# Supplementary material for: Unsupervised Deconvolution of Dynamic Imaging Reveals Intratumor Vascular Heterogeneity and Repopulation Dynamics
Source: PubMed Central journal article supplement (PMC4224420; doi:10.1371/journal.pone.0112143), 2014-11-07
Supplement: pone.0112143.s011.pdf [file pone.0112143.s011.pdf]

## Data S1

### Demo\_for\_simulation.m:

```
clear;close all;clc;
load 'simdataS1SNR10'

%=====
%-----CAM-----
[A_est S_est]=CAM(X_mask,3,1,0);
% -----end CAM-----
%=====

%=====
%-----Decide which curve correspond to which tissue type-----
K=3;
for k=1:K,
    [peak,peakIX(k)]=max(A_est(:,k));
end
[peakind,inds]=max(peakIX); %% the slow flow has latest come of peak
[peakind,indp]=min(peakIX); %% the input function has earliest come of
peak
indf=setdiff([1,2,3],[inds,indp]);
TC_f=A_est(:,indf);
TC_s=A_est(:,inds);
TC_p=A_est(:,indp);
TCs=[TC_f,TC_s,TC_p];
% -----show TCs-----
h=figure;
x=[1:size(TC_p,1)]*0.5;    %0.5 minutes per frame
hl1 = line(x,TC_p,'LineStyle','--','Color','b');legend('input')
ax1 = gca;
set(ax1,'XColor','b','YColor','b')
xlabel('Time (minutes)')
ylabel('Tracer Concentration (mM/L)')
text(size(TC_p,1)/2,max(TC_p)/2,'Estimated TCs');%%to show title of
the figure
ax2 =
axes('Position',get(ax1,'Position'),'XAxisLocation','top','YAxisLocati
on','right','Color','none','XColor','r','YColor','r');
hl2 = line(x,TC_f,'Color','r','LineStyle','-','Parent',ax2);
hold on;
hl3 =
line(x,TC_s,'Color','r','LineStyle',':','Parent',ax2);legend('fast','s
low')
ylabel('Tracer Concentration (mM/L)')
saveas(h,'Estimated TCs.png')

h=figure;
hl1 = line(x,gtTCp,'LineStyle','--','Color','b');legend('input')
```

```

ax1 = gca;
set(ax1,'XColor','b','YColor','b')
xlabel('Time (minutes)')
ylabel('Tracer Concentration (mM/L)')
text(size(TC_p,1)/2,max(gtTCp)/2,'Ground Truth TCs');%%to show title
of the figure
ax2 =
axes('Position',get(ax1,'Position'),'XAxisLocation','top','YAxisLocati
on','right','Color','none','XColor','r','YColor','r');
hl2 = line(x,gtTCf,'Color','r','LineStyle','-','Parent',ax2);
hold on;
hl3 =
line(x,gtTCs,'Color','r','LineStyle',':','Parent',ax2);legend('fast','
slow')
ylabel('Tracer Concentration (mM/L)')
saveas(h,'Ground Truth TCs.png')
% -----end-----
%=====

%=====
% -----perform CM-----
% random initialization
kis=0.1*rand(1);
kos=kis+rand(1);
kif=0.1*rand(1);
kof=kif+rand(1);
initk=[kis,kos,kif,kof];
[eKtrans_s,eKep_s,eKtrans_f,eKep_f,pixelwise_Ktran]=CM(X_mask,TCs,init
k,del_t);
save simresult eKtrans_s eKep_s eKtrans_f eKep_f Ktrans_s Kep_s
Ktrans_f Kep_f
% -----end perform CM-----
% =====

```

Ground truth TCs:

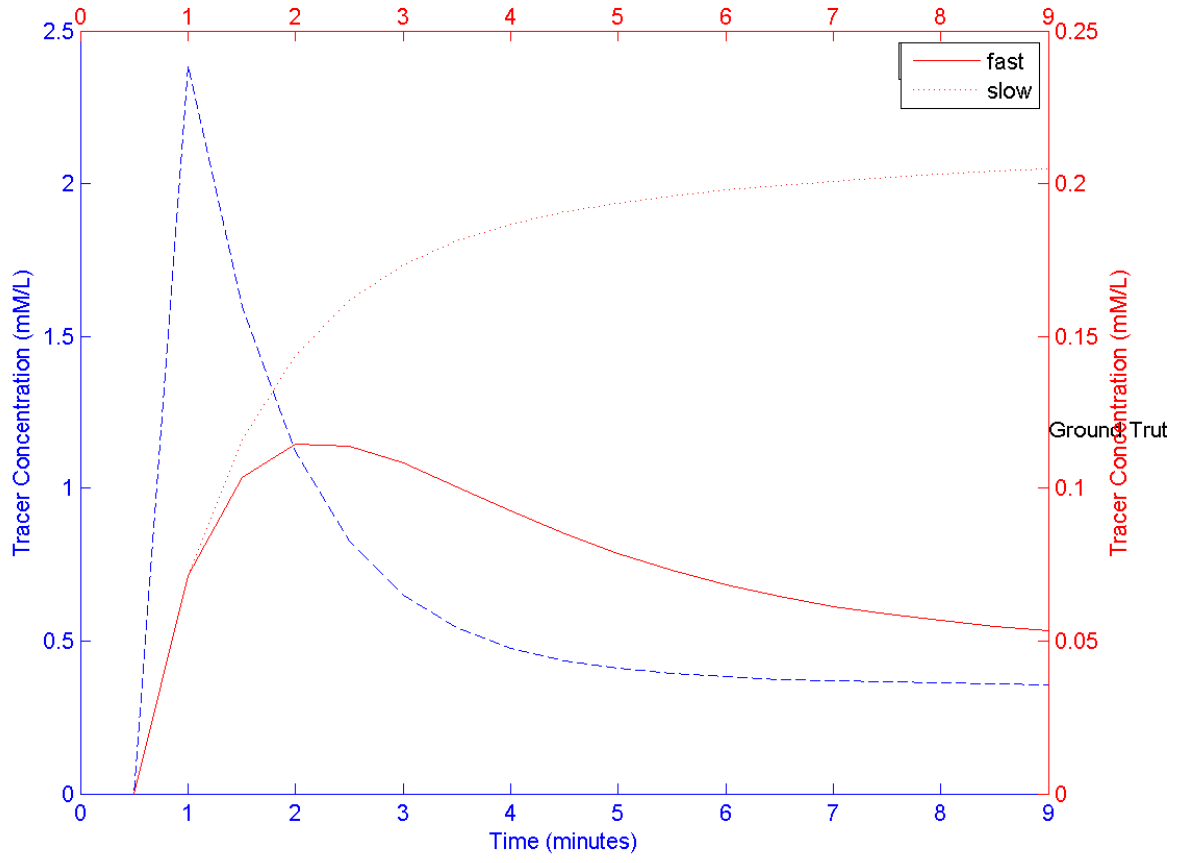

# Estimated TCs

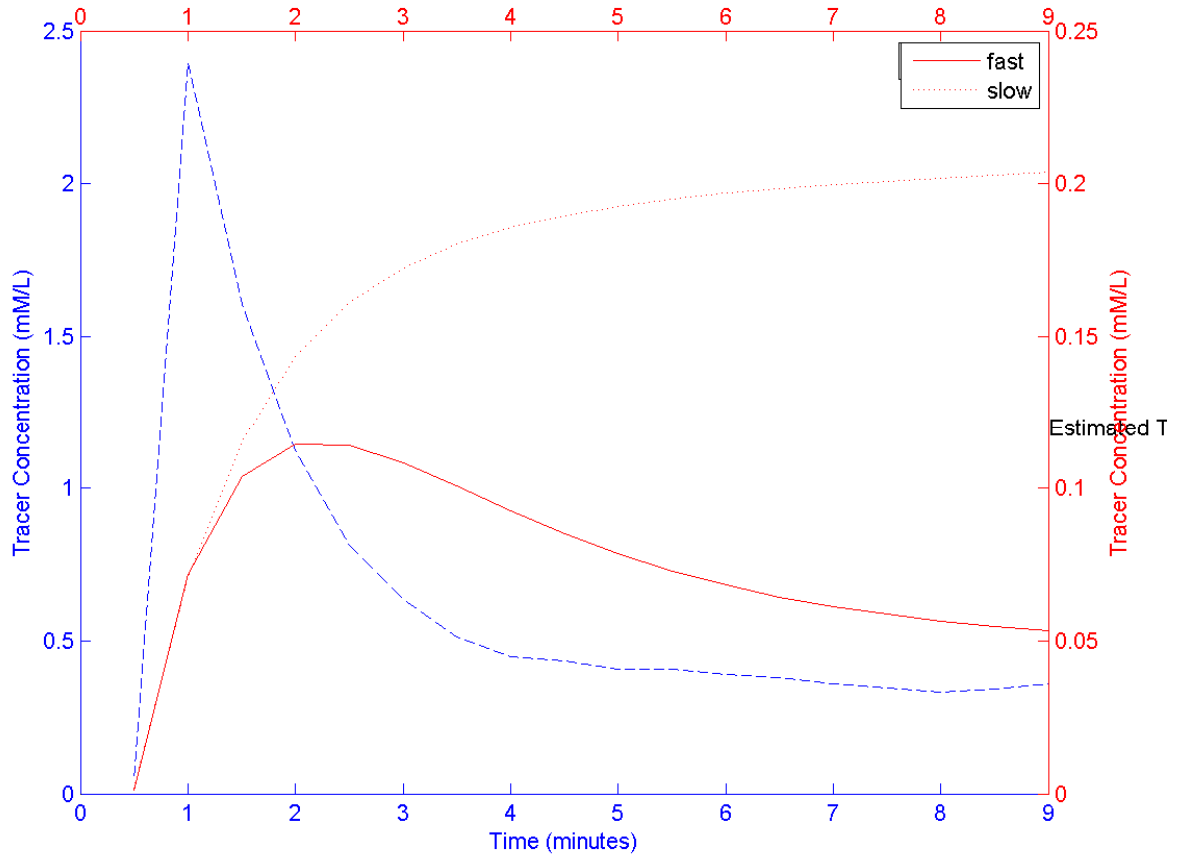

ROI\_fast:

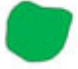

ROI\_slow:

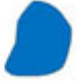

ROI\_input

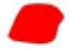

Simulation data S1SNR10 result:

Kep\_f=0.5

Kep\_s=0.1

Ktrans\_f=0.03

Ktrans\_s=0.03

eKep\_f=0.4875

eKep\_s=0.0962

eKtrans\_f=0.0296

eKtrans\_s=0.0296

simulator.m:

```
clear;clc
close all

% DCE-MRI data simulation, generate the data "simdata.mat"
% make sure you set the current directory to the one containing "Simulator.m"

% % % % % % % % =====parameter setting
=====
NumTframe=18;          % number of time frames for Dynamic imaging data
del_t=0.5;             % the sampling interval between time frames (/min)
SNR=10;                % the signal to noise ratio for the simulated data
Ktrans_s = 0.05;      % volume transfer rate for slow flow
Kep_s =0.6;            % flux rate for slow flow
Ktrans_f = 0.08;      % volume transfer rate for fast flow
Kep_f = 1.5;           % flux rate for fast flow
% Note: The spatial distribution of different tissue types are in the figures:
ROI_fast.jpg, ROI_slow.jpg, ROI_input.jpg
% % % % % % % % =====

%=====distribution maps for different tissue types=====
%-----slow volume transfer
R1 = double(imread('ROI_fast.jpg')); R1=R1(:, :, 1)/255; [m n]=size(R1); R1 =
ones(m,n)-R1;
R1(find(R1>0.5))=1; R1(find(R1<=0.5))=0;
R1(R1==1) = imnoise(R1(R1==1), 'gaussian', 0, 0.05); %add gaussian noise on
the spatial distribution
%-----plasma volume
R2 = double(imread('ROI_input.jpg')); R2=R2(:, :, 2)/255; R2 = ones(m,n)-R2;
R2(find(R2>0.5))=1; R2(find(R2<=0.5))=0;
R2(R2==1) = imnoise(R2(R2==1), 'gaussian', 0, 0.05);
%-----fast volume transfer
R3 = double(imread('ROI_slow.jpg')); R3=R3(:, :, 1)/255; R3 = ones(m,n)-R3;
R3(find(R3>0.5))=1; R3(find(R3<=0.5))=0;
R3(R3==1) = imnoise(R3(R3==1), 'gaussian', 0, 0.05);

%=====Time activity curves=====
%-----Plasma input function-----
time=0:0.5:15; % mintues
Cp=0.5*(3.99*exp(-1*time)+0.78*exp(-0.0111*time));
%-----Associated fast volume transfer compartment-----
Cf = Ktrans_f*conv(Cp, exp(-Kep_f*time));
Cf = Cf(1:length(time));
%-----Associated slow volume transfer compartment-----
Cs = Ktrans_s*conv(Cp, exp(-Kep_s*time));
Cs = Cs(1:length(time));

Cp=[0, Cp(1:NumTframe-1)];
Cs=[0, Cs(1:NumTframe-1)];
Cf=[0, Cf(1:NumTframe-1)];
```

```

% %-----show Cp, Cs, Cf-----
% timeslot=[0:NumTframe-1]*del_t;
% figure; plot(timeslot, Cp, '-b','LineWidth', 4);
% hold on; plot(timeslot, Cs,':g', 'LineWidth', 4);
% hold on; plot(timeslot, Cf,'--r','LineWidth', 4);
% legend ('plasma input','slow flow','fast flow', 'fontsize', 18, 1);
% xlabel('time (min)','fontsize', 18);
% ylabel('Tracer Concentration (mM/L)','fontsize', 18);
% set (gcf,'Position',[300,300,400,300], 'color','w');
% %-----show normalized Cp, Cs, Cf-----
% figure; plot(timeslot, Cp/sum(Cp), '-b','LineWidth', 4);
% hold on; plot(timeslot, Cs/sum(Cs),':g', 'LineWidth', 4);
% hold on; plot(timeslot, Cf/sum(Cf),'--r','LineWidth', 4);
% legend ('plasma input','slow flow','fast flow', 'fontsize', 18, 1);
% xlabel('time (min)','fontsize', 18);
% ylabel('Normalized TC','fontsize', 18);
% set(gca,'fontsize',18)

%====Data generation====
sumR=R1(:)+R2(:)+R3(:)+eps;
S = [R1(:)'./sumR'; R2(:)'./sumR'; R3(:)'./sumR'];
A = [Cs' Cp' Cf'];
X = A*S;
%-----loading the mask-----
index=find(sum(S,1)>0);
index=index';
N=length(index); % N is the number of the pixels in masked ROI
M=NumTframe;

X_mask=X(:,index);
Rn=eye(M);
alpha=0.9;
for i=1:M
    for j=1:M
        Rn(i,j)=alpha^(abs(i-j));
    end
end
R=chol(Rn);

for i=1:N,
    sigma=std(X_mask(:,i))*10^(-SNR/10);
    X_mask(:,i)=X_mask(:,i)+sigma*R'*randn(M,1);
end
X_mask(find(X_mask<0))=eps;
origX=X(:,index);
gtS=S(:,index); gtSs=gtS(1,:); gtSp=gtS(2,:); gtSf=gtS(3,:);
gtTCp=Cp';gtTCf=Cf';gtTCs=Cs';
save simdata gtTCf gtTCs gtTCp gtSs gtSp gtSf del_t Ktrans_f Kep_f Ktrans_s
Kep_s X_mask

```





|         |         |         |         |         |         |   |
|---------|---------|---------|---------|---------|---------|---|
| 0       | 0       | 0       | 0       | 0       | 0       | 0 |
| 0.5     | 0.46736 | 0.4634  | 0.5     | 0.52245 | 0.4886  |   |
| 0       | 0       | 0       | 0       | 0       | 0       |   |
| 0       | 0       | 0       | 0       | 0       | 0       |   |
| 0       | 0       | 0       | 0       | 0       | 0       |   |
| 0       | 0       | 0       | 0       | 0       | 0       |   |
| 0       | 0       | 0       | 0       | 0.49022 | 0.57984 |   |
| 0.41857 | 0.37374 | 0.5     | 0.54093 | 0.5     | 0.57661 |   |
| 0.5     | 0       | 0       | 0       | 0       | 0       |   |
| 0       | 0       | 0       | 0       | 0       | 0       |   |
| 0       | 0       | 0       | 0       | 0       | 0       |   |
| 0       | 0       | 0       | 0.49138 | 0.47198 | 0.5     |   |
| 0.58079 | 0.5     | 0.50888 | 0.56456 | 0.60103 | 0.53759 |   |
| 0.52786 | 0.54348 | 0.41996 | 0       | 0       | 0       |   |
| 0       | 0       | 0       | 0       | 0       | 0       |   |
| 0       | 0       | 0       | 0       | 0       | 0       |   |
| 0       | 0       | 0       | 0       | 0       | 0       |   |
| 0       | 0.47515 | 0.46177 | 0.48304 | 0.46769 | 0.50609 |   |
| 0.57877 | 0.5     | 0.4066  | 0.47317 | 0.45989 | 0.53221 |   |
| 0.5     | 0.49707 | 0.41003 | 0.57031 | 0       | 0       |   |
| 0       | 0       | 0       | 0       | 0       | 0       |   |
| 0       | 0       | 0       | 0       | 0       | 0       |   |
| 0       | 0       | 0       | 0       | 0       | 0       |   |
| 0.5     | 0.5085  | 0.5     | 0.46075 | 0.5342  | 0.49722 |   |
| 0.5     | 0.52192 | 0.45687 | 0.5     | 0.51491 | 0.40948 |   |
| 0.65548 | 0.58223 | 0.5     | 0.5     | 0.59748 | 0.5     |   |
| 0       | 0       | 0       | 0       | 0       | 0       |   |
| 0       | 0       | 0       | 0       | 0       | 0.34131 |   |
| 0.29458 | 0.30372 | 0.37115 | 0.37492 | 0.26713 | 0.38387 |   |
| 0.33803 | 0.44792 | 0.496   | 0.5     | 0.48695 | 0.46982 |   |
| 0.5     | 0.4778  | 0.50319 | 0.48983 | 0.56002 | 0.50014 |   |
| 0.35275 | 0.5     | 0.49097 | 0.5     | 0.5     | 0.44565 |   |
| 0.4977  | 0.48922 | 0       | 0       | 0       | 0       |   |
| 0       | 0       | 0       | 0       | 0       | 0.50705 |   |
| 0.30936 | 0.29768 | 0.28929 | 0.36855 | 0.33333 | 0.32306 |   |
| 0.25054 | 0.26664 | 0.33655 | 0.33728 | 0.5265  | 0.43687 |   |
| 0.39823 | 0.49444 | 0.48603 | 0.48632 | 0.5     | 0.5     |   |
| 0.50093 | 0.55883 | 0.23132 | 0.56067 | 0.50146 | 0.65757 |   |
| 0.48994 | 0.44525 | 0.5     | 0.51636 | 0       | 0       |   |
| 0       | 0       | 0       | 0       | 0       | 0.53001 |   |
| 0.509   | 0.49879 | 0.33333 | 0.36575 | 0.33633 | 0.27239 |   |
| 0.33453 | 0.33874 | 0.33333 | 0.33926 | 0.34324 | 0.28438 |   |
| 0.68184 | 0.45931 | 0.56814 | 0.5     | 0.52791 | 0.4179  |   |
| 0.5     | 0.46543 | 0.52031 | 0.5     | 0.49534 | 0.48094 |   |
| 0.42707 | 0.5     | 0.48776 | 0.45348 | 0.5     | 0.55252 |   |
| 0       | 0       | 0       | 0       | 0       | 0       |   |
| 0.55814 | 0.5     | 0.5     | 0.5     | 0.51276 | 0.27307 |   |
| 0.3564  | 0.33333 | 0.32483 | 0.33726 | 0.36491 | 0.3364  |   |
| 0.42017 | 0.34039 | 0.44679 | 0.51322 | 0.59962 | 0.38591 |   |
| 0.43854 | 0.5     | 0.46699 | 0.5426  | 0.5     | 0.51752 |   |
| 0.44191 | 0.58394 | 0.46671 | 0.417   | 0.5     | 0.56451 |   |

|         |         |         |         |         |         |
|---------|---------|---------|---------|---------|---------|
| 0.5     | 0.5     | 0       | 0       | 0       | 0       |
| 0       | 0.45399 | 0.55224 | 0.5     | 0.40293 | 0.46445 |
| 0.44886 | 0.31825 | 0.40739 | 0.26596 | 0.33707 | 0.38413 |
| 0.35651 | 0.28775 | 0.38273 | 0.3526  | 0.45907 | 0.5     |
| 0.46707 | 0.38639 | 0.42286 | 0.5     | 0.41797 | 0.5     |
| 0.5     | 0.51749 | 0.5     | 0.39871 | 0.56759 | 0.50127 |
| 0.50829 | 0.55528 | 0.5     | 0.49056 | 0       | 0       |
| 0       | 0.46695 | 0.5     | 0.52821 | 0.44401 | 0.41725 |
| 0.5     | 0.44412 | 0.51833 | 0.33333 | 0.34242 | 0.27339 |
| 0.31995 | 0.36287 | 0.35858 | 0.36496 | 0.30718 | 0.34928 |
| 0.54226 | 0.52175 | 0.52146 | 0.46746 | 0.5632  | 0.5     |
| 0.5     | 0.37305 | 0.5     | 0.58453 | 0.52485 | 0.5326  |
| 0.53875 | 0.5331  | 0.55172 | 0.44858 | 0.5     | 0.45056 |
| 0       | 0.35561 | 0.46489 | 0.5     | 0.48327 | 0.41698 |
| 0.54751 | 0.5     | 0.48743 | 0.46501 | 0.34119 | 0.38883 |
| 0.20008 | 0.35015 | 0.28411 | 0.2614  | 0.26973 | 0.45708 |
| 0.32724 | 0.47467 | 0.5     | 0.49999 | 0.53253 | 0.50152 |
| 0.46812 | 0.53366 | 0.48796 | 0.44676 | 0.46675 | 0.33116 |
| 0.53908 | 0.38963 | 0.46469 | 0.50585 | 0.47543 | 0.48188 |
| 1       | 0.50574 | 0.47828 | 0.51905 | 0.42334 | 0.42155 |
| 0.5     | 0.52639 | 0.62511 | 0.5     | 0.53928 | 0.30627 |
| 0.3109  | 0.33811 | 0.3571  | 0.35143 | 0.32371 | 0.25506 |
| 0.32528 | 0.34024 | 0.48026 | 0.5     | 0.5     | 0.41324 |
| 0.50672 | 0.46018 | 0.49728 | 0.50519 | 0.52716 | 0.59241 |
| 0.48647 | 0.46144 | 0.55328 | 0.48448 | 0.43001 | 0.53994 |
| 0.49547 | 1       | 0.5     | 0.5     | 0.51416 | 0.50594 |
| 0.4961  | 0.47434 | 0.48871 | 0.5     | 0.5     | 0.52609 |
| 0.30335 | 0.25654 | 0.39804 | 0.38267 | 0.40913 | 0.21581 |
| 0.37017 | 0.34479 | 0.52286 | 0.5     | 0.5249  | 0.54172 |
| 0.64004 | 0.49975 | 0.55522 | 0.52135 | 0.49118 | 0.45786 |
| 0.38338 | 0.41524 | 0.52251 | 0.49164 | 0.5     | 0.48189 |
| 0.51867 | 0.54541 | 1       | 0.46733 | 0.5     | 0.47521 |
| 0.52    | 0.48142 | 0.45067 | 0.47865 | 0.6147  | 0.53689 |
| 0.43313 | 0.27266 | 0.40651 | 0.34571 | 0.34031 | 0.32909 |
| 0.26615 | 0.30899 | 0.31487 | 0.48655 | 0.57853 | 0.5     |
| 0.57737 | 0.52092 | 0.5     | 0.5     | 0.48164 | 0.2879  |
| 0.4749  | 0.4967  | 0.55365 | 0.54106 | 0.4772  | 0.56969 |
| 0.43741 | 0.41026 | 1       | 1       | 1       | 0.55253 |
| 0.44011 | 0.45628 | 0.50539 | 0.49549 | 0.81754 | 0.61035 |
| 0.52339 | 0.5     | 0.33333 | 0.33333 | 0.36645 | 0.22683 |
| 0.30328 | 0.33333 | 0.63393 | 0.5     | 0.5     | 0.5     |
| 0.49157 | 0.5     | 0.44523 | 0.62166 | 0.5     | 0.54115 |
| 0.57537 | 0.34631 | 0.47505 | 0.5     | 0.56466 | 0.49448 |
| 0.53735 | 0.5     | 1       | 1       | 1       | 1       |
| 0.42914 | 0.5     | 0.5     | 0.44567 | 0.49111 | 0.5     |
| 0.5     | 0.5     | 0.5     | 0.30146 | 0.29276 | 0.33787 |
| 0.50187 | 0.50146 | 0.12723 | 0.53647 | 0.43661 | 0.5     |
| 0.54198 | 0.5     | 0.51439 | 0.5576  | 0.37509 | 0.45721 |
| 0.5     | 0.55761 | 0.44074 | 0.5     | 0.53646 | 0.45554 |
| 0.5     | 0.58788 | 1       | 1       | 1       | 1       |
| 1       | 1       | 0.50281 | 0.5     | 0.52082 | 0.4906  |
| 0.5     | 0.5     | 0.46119 | 0.47794 | 0.43427 | 0.5     |



|         |         |         |         |         |         |     |
|---------|---------|---------|---------|---------|---------|-----|
| 1       | 1       | 1       | 1       | 1       | 1       | 1   |
| 1       | 1       | 1       | 1       | 1       | 1       | 1   |
| 1       | 1       | 1       | 1       | 1       | 1       | 1   |
| 1       | 1       | 1       | 1       | 1       | 1       | 1   |
| 1       | 1       | 1       | 1       | 1       | 1       | 1   |
| 1       | 1       | 1       | 1       | 1       | 1       | 1   |
| 1       | 1       | 1       | 1       | 1       | 1       | 1   |
| 1       | 1       | 1       | 1       | 1       | 1       | 1   |
| 1       | 1       | 1       | 1       | 1       | 1       | 1   |
| 1       | 1       | 1       | 1       | 1       | 1       | 1   |
| 1       | 1       | 1       | 1       | 1       | 1       | 1   |
| 1       | 1       | 1       | 1       | 1       | 1       | 1   |
| 1       | 1       | 1       | 1       | 1       | 1       | 1   |
| 1       | 1       | 1       | 1       | 1       | 1       | 1   |
| 1       | 1       | 1       | 1       | 1       | 1       | 1   |
| 1       | 1       | 1       | 1       | 1       | 1       | 1   |
| 1       | 1       | 1       | 1       | 1       | 1       | 1   |
| 1       | 1       | 1       | 1       | 1       | 1       | 1   |
| gtSs=1  | 1       | 1       | 1       | 1       | 1       | 1   |
| 1       | 1       | 1       | 1       | 1       | 1       | 1   |
| 1       | 1       | 1       | 1       | 1       | 1       | 1   |
| 1       | 1       | 0.42836 | 0.4788  | 0.47053 | 0.50637 |     |
| 1       | 1       | 1       | 1       | 1       | 1       |     |
| 1       | 1       | 1       | 1       | 1       | 1       |     |
| 1       | 1       | 1       | 0       | 0.49645 | 0.49671 |     |
| 0.50492 | 0.52901 | 0.5     | 0.49199 | 1       |         | 1   |
| 1       | 1       | 1       | 1       | 1       | 1       |     |
| 1       | 1       | 1       | 1       | 1       | 1       |     |
| 1       | 0       | 0       | 0.54259 | 0.4154  | 0.5     |     |
| 0.46973 | 0.48501 | 0.43905 | 0.66366 | 0.4839  |         | 1   |
| 1       | 1       | 1       | 1       | 1       | 1       |     |
| 1       | 1       | 1       | 1       | 1       | 1       |     |
| 1       | 1       | 0       | 0       | 0       | 0.51849 |     |
| 0.48634 | 0.58601 | 0.50608 | 0.5     | 0.56976 | 0.67163 |     |
| 0.49326 | 0.5     | 1       | 1       | 1       | 1       | 1   |
| 1       | 1       | 1       | 1       | 1       | 1       |     |
| 1       | 1       | 1       | 1       | 1       | 1       |     |
| 0       | 0       | 0       | 0       | 0.41688 | 0.60648 |     |
| 0.59026 | 0.5032  | 0.5     | 0.5252  | 0.47334 |         | 0.5 |
| 0.49158 | 0.49133 | 1       | 1       | 1       | 1       | 1   |
| 1       | 1       | 1       | 1       | 1       | 1       |     |
| 1       | 1       | 1       | 1       | 1       | 1       |     |
| 0       | 0       | 0       | 0       | 0       | 0       |     |
| 0.48372 | 0.43016 | 0.55212 | 0.49644 | 0.5     |         | 0.5 |
| 0.5     | 0.5     | 0.52921 | 0.41594 | 1       |         | 1   |
| 1       | 1       | 1       | 1       | 1       | 1       |     |
| 1       | 1       | 1       | 1       | 1       | 1       |     |
| 1       | 1       | 1       | 0       | 0       | 0       |     |
| 0       | 0       | 0       | 0.66941 | 0.5     | 0.56393 |     |
| 0.5     | 0.49266 | 0.54063 | 0.53974 | 0.44355 | 0.52109 |     |
| 0.47686 | 0.4557  | 1       | 1       | 1       | 1       | 1   |
| 1       | 1       | 1       | 1       | 1       | 1       |     |
| 1       | 1       | 1       | 0.4407  | 0.64688 | 0.48558 |     |

|         |         |         |         |         |         |   |
|---------|---------|---------|---------|---------|---------|---|
| 1       | 0       | 0       | 0       | 0       | 0       | 0 |
| 0       | 0       | 0.46085 | 0.50722 | 0.38179 | 0.4921  |   |
| 0.4461  | 0.40522 | 0.44416 | 0.58802 | 0.41052 | 0.48945 |   |
| 0.53199 | 1       | 1       | 1       | 1       | 1       | 1 |
| 1       | 1       | 1       | 1       | 1       | 1       | 1 |
| 0.5     | 0.53264 | 0.5366  | 0.5     | 0.47755 | 0.5114  |   |
| 1       | 0       | 0       | 0       | 0       | 0       |   |
| 0       | 0       | 0.5     | 0.40446 | 0.41206 | 0.4912  |   |
| 0.5     | 0.5     | 0.5     | 0.50185 | 0.5     | 0.50788 |   |
| 0.54295 | 1       | 1       | 1       | 1       | 1       | 1 |
| 1       | 1       | 1       | 1       | 0.50978 | 0.42016 |   |
| 0.58143 | 0.62626 | 0.5     | 0.45907 | 0.5     | 0.42339 |   |
| 0.5     | 1       | 0       | 0       | 0       | 0       |   |
| 0       | 0       | 0       | 0.54929 | 0.49298 | 0.5     |   |
| 0.55717 | 0.5     | 0.50252 | 0.5     | 0.3353  | 0.5     |   |
| 0.51478 | 0.5055  | 0.38605 | 1       | 1       | 1       |   |
| 1       | 1       | 1       | 0.50862 | 0.52802 | 0.5     |   |
| 0.41921 | 0.5     | 0.49112 | 0.43544 | 0.39897 | 0.46241 |   |
| 0.47214 | 0.45652 | 0.58004 | 0       | 0       | 0       |   |
| 0       | 0       | 0       | 0       | 0.70065 | 0.43767 |   |
| 0.52246 | 0.5     | 0.39289 | 0.52409 | 0.45618 | 0.57275 |   |
| 0.51302 | 0.5     | 0.5     | 0.50502 | 1       | 1       |   |
| 1       | 0.52485 | 0.53823 | 0.51696 | 0.53231 | 0.49391 |   |
| 0.42123 | 0.5     | 0.5934  | 0.52683 | 0.54011 | 0.46779 |   |
| 0.5     | 0.50293 | 0.58997 | 0.42969 | 0       | 0       |   |
| 0       | 0       | 0       | 0       | 0       | 0       |   |
| 0       | 0.4412  | 0.45804 | 0.56263 | 0.49764 | 0.5     |   |
| 0.50105 | 0.49794 | 0.49742 | 0.49911 | 0.47735 | 0.52504 |   |
| 0.5     | 0.4915  | 0.5     | 0.53925 | 0.4658  | 0.50278 |   |
| 0.5     | 0.47808 | 0.54313 | 0.5     | 0.48509 | 0.59052 |   |
| 0.34452 | 0.41777 | 0.5     | 0.5     | 0.40252 | 0.5     |   |
| 0       | 0       | 0       | 0       | 0       | 0       |   |
| 0       | 0       | 0       | 0.58635 | 0.45237 | 0.26797 |   |
| 0.37019 | 0.34814 | 0.29133 | 0.29178 | 0.36643 | 0.33279 |   |
| 0.28566 | 0.23479 | 0.504   | 0.5     | 0.51305 | 0.53018 |   |
| 0.5     | 0.5222  | 0.49681 | 0.51017 | 0.43998 | 0.49986 |   |
| 0.64725 | 0.5     | 0.50903 | 0.5     | 0.5     | 0.55435 |   |
| 0.5023  | 0.51078 | 0       | 0       | 0       | 0       |   |
| 0       | 0       | 0       | 0       | 0       | 0       |   |
| 0.34532 | 0.35116 | 0.3535  | 0.25942 | 0.33333 | 0.33847 |   |
| 0.35406 | 0.42044 | 0.30239 | 0.32544 | 0.4735  | 0.56313 |   |
| 0.60177 | 0.50556 | 0.51397 | 0.51368 | 0.5     | 0.5     |   |
| 0.49907 | 0.44117 | 0.76868 | 0.43933 | 0.49854 | 0.34243 |   |
| 0.51006 | 0.55475 | 0.5     | 0.48364 | 0       | 0       |   |
| 0       | 0       | 0       | 0       | 0       | 0       |   |
| 0       | 0       | 0.33333 | 0.2685  | 0.33633 | 0.35482 |   |
| 0.3434  | 0.34484 | 0.33333 | 0.31669 | 0.31351 | 0.35781 |   |
| 0.31816 | 0.54069 | 0.43186 | 0.5     | 0.47209 | 0.5821  |   |
| 0.5     | 0.53457 | 0.47969 | 0.5     | 0.50466 | 0.51906 |   |
| 0.57293 | 0.5     | 0.51224 | 0.54652 | 0.5     | 0.44748 |   |
| 0       | 0       | 0       | 0       | 0       | 0       |   |
| 0       | 0       | 0       | 0       | 0       | 0.36346 |   |

|         |         |         |         |         |         |
|---------|---------|---------|---------|---------|---------|
| 0.35794 | 0.33333 | 0.3204  | 0.32549 | 0.27019 | 0.3364  |
| 0.33417 | 0.34039 | 0.55321 | 0.48678 | 0.40038 | 0.61409 |
| 0.56146 | 0.5     | 0.53301 | 0.4574  | 0.5     | 0.48248 |
| 0.55809 | 0.41606 | 0.53329 | 0.583   | 0.5     | 0.43549 |
| 0.5     | 0.5     | 0       | 0       | 0       | 0       |
| 0       | 0       | 0       | 0       | 0       | 0       |
| 0       | 0.37604 | 0.37413 | 0.36702 | 0.32586 | 0.33673 |
| 0.35651 | 0.41616 | 0.24485 | 0.21336 | 0.54093 | 0.5     |
| 0.53293 | 0.61361 | 0.57714 | 0.5     | 0.58203 | 0.5     |
| 0.5     | 0.48251 | 0.5     | 0.60129 | 0.43241 | 0.49873 |
| 0.49171 | 0.44472 | 0.5     | 0.50944 | 0       | 0       |
| 0       | 0       | 0       | 0       | 0       | 0       |
| 0       | 0       | 0       | 0.33333 | 0.41636 | 0.3633  |
| 0.36755 | 0.34828 | 0.22236 | 0.23084 | 0.35626 | 0.30144 |
| 0.45774 | 0.47825 | 0.47854 | 0.53254 | 0.4368  | 0.5     |
| 0.5     | 0.62695 | 0.5     | 0.41547 | 0.47515 | 0.4674  |
| 0.46125 | 0.4669  | 0.44828 | 0.55142 | 0.5     | 0.54944 |
| 0       | 0       | 0       | 0       | 0       | 0       |
| 0       | 0       | 0       | 0       | 0.30128 | 0.28575 |
| 0.34876 | 0.35015 | 0.3774  | 0.36469 | 0.41159 | 0.18269 |
| 0.33638 | 0.52533 | 0.5     | 0.50001 | 0.46747 | 0.49848 |
| 0.53188 | 0.46634 | 0.51204 | 0.55324 | 0.53325 | 0.66884 |
| 0.46092 | 0.61037 | 0.53531 | 0.49415 | 0.52457 | 0.51812 |
| 0       | 0       | 0       | 0       | 0       | 0       |
| 0       | 0       | 0       | 0       | 0       | 0.34384 |
| 0.40322 | 0.33516 | 0.33796 | 0.29715 | 0.38546 | 0.37247 |
| 0.33736 | 0.31952 | 0.51974 | 0.5     | 0.5     | 0.58676 |
| 0.49328 | 0.53982 | 0.50272 | 0.49481 | 0.47284 | 0.40759 |
| 0.51353 | 0.53856 | 0.44672 | 0.51552 | 0.56999 | 0.46006 |
| 0.50453 | 0       | 0       | 0       | 0       | 0       |
| 0       | 0       | 0       | 0       | 0       | 0       |
| 0.34637 | 0.37173 | 0.29195 | 0.38267 | 0.38562 | 0.34992 |
| 0.33838 | 0.31042 | 0.47714 | 0.5     | 0.4751  | 0.45828 |
| 0.35996 | 0.50025 | 0.44478 | 0.47865 | 0.50882 | 0.54214 |
| 0.61662 | 0.58476 | 0.47749 | 0.50836 | 0.5     | 0.51811 |
| 0.48133 | 0.45459 | 0       | 0       | 0       | 0       |
| 0       | 0       | 0       | 0       | 0       | 0       |
| 0       | 0.32829 | 0.36191 | 0.34416 | 0.34031 | 0.35558 |
| 0.36772 | 0.3455  | 0.36911 | 0.51345 | 0.42147 | 0.5     |
| 0.42263 | 0.47908 | 0.5     | 0.5     | 0.51836 | 0.7121  |
| 0.5251  | 0.5033  | 0.44635 | 0.45894 | 0.5228  | 0.43031 |
| 0.56259 | 0.58974 | 0       | 0       | 0       | 0       |
| 0       | 0       | 0       | 0       | 0       | 0       |
| 0       | 0       | 0.33333 | 0.33333 | 0.36645 | 0.38785 |
| 0.34836 | 0.33333 | 0.36607 | 0.5     | 0.5     | 0.5     |
| 0.50843 | 0.5     | 0.55477 | 0.37834 | 0.5     | 0.45885 |
| 0.42463 | 0.65369 | 0.52495 | 0.5     | 0.43534 | 0.50552 |
| 0.46265 | 0.5     | 0       | 0       | 0       | 0       |
| 0       | 0       | 0       | 0       | 0       | 0       |
| 0       | 0       | 0       | 0.34933 | 0.36768 | 0.32385 |
| 0.49813 | 0.49854 | 0.87277 | 0.46353 | 0.56339 | 0.5     |
| 0.45802 | 0.5     | 0.48561 | 0.4424  | 0.62491 | 0.54279 |





|         |         |         |         |         |         |     |
|---------|---------|---------|---------|---------|---------|-----|
| 0       | 0       | 0       | 0       | 0       | 0       | 0   |
| 0       | 0       | 0       | 0       | 0       | 0       | 0   |
| 0       | 0       | 0       | 0       | 0       | 0       | 0   |
| 0       | 0       | 0       | 0       | 0       | 0       | 0   |
| 0       | 0       | 0       | 0       | 0       | 0       | 0   |
| 0       | 0       | 0       | 0       | 0       | 0       | 0   |
| 0       | 0       | 0       | 0       | 0       | 0       | 0   |
| 0       | 0       | 0       | 0       | 0       | 0       | 0   |
| 0       | 0       | 0       | 0       | 0       | 0       | 0   |
| 0       | 0       | 0       | 0       | 0       | 0       | 0   |
| 0       | 0       | 0       | 0       | 0       | 0       | 0   |
| 0       | 0       | 0       | 0       | 0       | 0       | 0   |
| 0       | 0       | 0       | 0       | 0       | 0       | 0   |
| 0       | 0       | 0       | 0       | 0       | 0       | 0   |
| 0       | 0       | 0       | 0       | 0       | 0       | 0   |
| 0       | 0       | 0       | 0       | 0       | 0       | 0   |
| 0       | 0       | 0       | 0       | 0       | 0       | 0   |
| 0       | 0       | 0       | 0       | 0       | 0       | 0   |
| 0       | 0       | 0       | 0       | 0       | 0       | 0   |
| 0       | 0       | 0       | 0       | 0       | 0       | 0   |
| 0       | 0       | 0       | 0       | 0       | 0       | 0   |
| 0       | 0       | 0       | 0       | 0       | 0       | 0   |
| 0       | 0       | 0       | 0       | 0       | 0       | 0   |
| 0       | 0       | 0       | 0       | 0       | 0       | 0   |
| gtSp=0  | 0       | 0       | 0       | 0       | 0       | 0   |
| 0       | 0       | 0       | 0       | 0       | 0       | 0   |
| 0       | 0       | 0       | 0       | 0       | 0       | 0   |
| 0       | 0       | 0.57164 | 0.5212  | 0.52947 | 0.49363 | 0   |
| 0       | 0       | 0       | 0       | 0       | 0       | 0   |
| 0       | 0       | 0       | 0       | 0       | 0       | 0   |
| 0       | 0       | 0       | 1       | 0.50355 | 0.50329 | 0   |
| 0.49508 | 0.47099 | 0.5     | 0.50801 | 0       | 0       | 0   |
| 0       | 0       | 0       | 0       | 0       | 0       | 0   |
| 0       | 0       | 0       | 0       | 0       | 0       | 0   |
| 0       | 1       | 1       | 0.45741 | 0.5846  | 0.5     | 0   |
| 0.53027 | 0.51499 | 0.56095 | 0.33634 | 0.5161  | 0       | 0   |
| 0       | 0       | 0       | 0       | 0       | 0       | 0   |
| 0       | 0       | 0       | 0       | 0       | 0       | 0   |
| 0       | 0       | 1       | 1       | 1       | 0.48151 | 0   |
| 0.51366 | 0.41399 | 0.49392 | 0.5     | 0.43024 | 0.32837 | 0   |
| 0.50674 | 0.5     | 0       | 0       | 0       | 0       | 0   |
| 0       | 0       | 0       | 0       | 0       | 0       | 0   |
| 0       | 0       | 0       | 0       | 0       | 0       | 0   |
| 1       | 1       | 1       | 1       | 0.58312 | 0.39352 | 0.5 |
| 0.40974 | 0.4968  | 0.5     | 0.4748  | 0.52666 | 0       | 0   |
| 0.50842 | 0.50867 | 0       | 0       | 0       | 0       | 0   |
| 0       | 0       | 0       | 0       | 0       | 0       | 0   |
| 0       | 0       | 0       | 0       | 0       | 0       | 0   |
| 1       | 1       | 1       | 1       | 1       | 1       | 1   |
| 0.51628 | 0.56984 | 0.44788 | 0.50356 | 0.5     | 0.5     | 0.5 |
| 0.5     | 0.5     | 0.47079 | 0.58406 | 0       | 0       | 0   |
| 0       | 0       | 0       | 0       | 0       | 0       | 0   |
| 0       | 0       | 0       | 0       | 0       | 0       | 0   |
| 0       | 0       | 0       | 1       | 1       | 1       | 1   |
| 1       | 1       | 1       | 0.33059 | 0.5     | 0.43607 | 0   |



|         |         |         |         |         |         |   |
|---------|---------|---------|---------|---------|---------|---|
| 0       | 0       | 0       | 0       | 0       | 0       | 0 |
| 0       | 0       | 0       | 0       | 0       | 0       | 0 |
| 1       | 1       | 1       | 1       | 1       | 1       | 1 |
| 0.44186 | 0.5     | 0.5     | 0.5     | 0.48724 | 0.36346 |   |
| 0.28566 | 0.33333 | 0.35477 | 0.33726 | 0.36491 | 0.3272  |   |
| 0.24566 | 0.31921 | 0       | 0       | 0       | 0       |   |
| 0       | 0       | 0       | 0       | 0       | 0       |   |
| 0       | 0       | 0       | 0       | 0       | 0       |   |
| 0       | 0       | 1       | 1       | 1       | 1       |   |
| 1       | 0.54601 | 0.44776 | 0.5     | 0.59707 | 0.53555 |   |
| 0.55114 | 0.30571 | 0.21848 | 0.36702 | 0.33707 | 0.27914 |   |
| 0.28697 | 0.29609 | 0.37242 | 0.43404 | 0       | 0       |   |
| 0       | 0       | 0       | 0       | 0       | 0       |   |
| 0       | 0       | 0       | 0       | 0       | 0       |   |
| 0       | 0       | 0       | 0       | 1       | 1       |   |
| 1       | 0.53305 | 0.5     | 0.47179 | 0.55599 | 0.58275 |   |
| 0.5     | 0.55588 | 0.48167 | 0.33333 | 0.24121 | 0.3633  |   |
| 0.3125  | 0.28885 | 0.41906 | 0.4042  | 0.33656 | 0.34928 |   |
| 0       | 0       | 0       | 0       | 0       | 0       |   |
| 0       | 0       | 0       | 0       | 0       | 0       |   |
| 0       | 0       | 0       | 0       | 0       | 0       |   |
| 1       | 0.64439 | 0.53511 | 0.5     | 0.51673 | 0.58302 |   |
| 0.45249 | 0.5     | 0.51257 | 0.53499 | 0.35753 | 0.32541 |   |
| 0.45116 | 0.2997  | 0.3385  | 0.37391 | 0.31868 | 0.36023 |   |
| 0.33638 | 0       | 0       | 0       | 0       | 0       |   |
| 0       | 0       | 0       | 0       | 0       | 0       |   |
| 0       | 0       | 0       | 0       | 0       | 0       |   |
| 0       | 0.49426 | 0.52172 | 0.48095 | 0.57666 | 0.57845 |   |
| 0.5     | 0.47361 | 0.37489 | 0.5     | 0.46072 | 0.34989 |   |
| 0.28588 | 0.32673 | 0.30494 | 0.35143 | 0.29082 | 0.37247 |   |
| 0.33736 | 0.34024 | 0       | 0       | 0       | 0       |   |
| 0       | 0       | 0       | 0       | 0       | 0       |   |
| 0       | 0       | 0       | 0       | 0       | 0       |   |
| 0       | 0       | 0.5     | 0.5     | 0.48584 | 0.49406 |   |
| 0.5039  | 0.52566 | 0.51129 | 0.5     | 0.5     | 0.47391 |   |
| 0.35029 | 0.37173 | 0.31002 | 0.23465 | 0.20525 | 0.43427 |   |
| 0.29145 | 0.34479 | 0       | 0       | 0       | 0       |   |
| 0       | 0       | 0       | 0       | 0       | 0       |   |
| 0       | 0       | 0       | 0       | 0       | 0       |   |
| 0       | 0       | 0       | 0.53267 | 0.5     | 0.52479 |   |
| 0.48    | 0.51858 | 0.54933 | 0.52135 | 0.3853  | 0.46311 |   |
| 0.56687 | 0.39905 | 0.23158 | 0.31013 | 0.31939 | 0.31532 |   |
| 0.36613 | 0.3455  | 0.31602 | 0       | 0       | 0       |   |
| 0       | 0       | 0       | 0       | 0       | 0       |   |
| 0       | 0       | 0       | 0       | 0       | 0       |   |
| 0       | 0       | 0       | 0       | 0       | 0.44747 |   |
| 0.55989 | 0.54372 | 0.49461 | 0.50451 | 0.18246 | 0.38965 |   |
| 0.47661 | 0.5     | 0.33333 | 0.33333 | 0.2671  | 0.38531 |   |
| 0.34836 | 0.33333 | 0       | 0       | 0       | 0       |   |
| 0       | 0       | 0       | 0       | 0       | 0       |   |
| 0       | 0       | 0       | 0       | 0       | 0       |   |
| 0       | 0       | 0       | 0       | 0       | 0       |   |



|   |   |   |   |   |   |
|---|---|---|---|---|---|
| 0 | 0 | 0 | 0 | 0 | 0 |
| 0 | 0 | 0 | 0 | 0 | 0 |
| 0 | 0 | 0 | 0 | 0 | 0 |
| 0 | 0 | 0 | 0 | 0 | 0 |
| 0 | 0 | 0 | 0 | 0 | 0 |
| 0 | 0 | 0 | 0 | 0 | 0 |
| 0 | 0 | 0 | 0 | 0 | 0 |
| 0 | 0 | 0 | 0 | 0 | 0 |
| 0 | 0 | 0 | 0 | 0 | 0 |
| 0 | 0 | 0 | 0 | 0 | 0 |
| 0 | 0 | 0 | 0 | 0 | 0 |
| 0 | 0 | 0 | 0 | 0 | 0 |
| 0 | 0 | 0 | 0 | 0 | 0 |
| 0 | 0 | 0 | 0 | 0 | 0 |
| 0 | 0 | 0 | 0 | 0 | 0 |
| 0 | 0 | 0 | 0 | 0 | 0 |
| 0 | 0 | 0 | 0 | 0 | 0 |
| 0 | 0 | 0 | 0 | 0 | 0 |
| 0 | 0 | 0 | 0 | 0 | 0 |
| 0 | 0 | 0 | 0 | 0 | 0 |
| 0 | 0 | 0 | 0 | 0 | 0 |
| 0 | 0 | 0 | 0 | 0 | 0 |
| 0 | 0 | 0 | 0 | 0 | 0 |

gtTCf=

0  
0.07155  
0.10366  
0.11432  
0.11389  
0.10824  
0.10059  
0.092638  
0.085208  
0.078648  
0.073046  
0.06836  
0.06449  
0.06132  
0.058731  
0.05662  
0.054894  
0.053478

gtTCs=

0  
0.07155  
0.116  
0.14393  
0.16177

0.17342  
0.18126  
0.18671  
0.19067  
0.19366  
0.19601  
0.19792  
0.19952  
0.20088  
0.20206  
0.20309  
0.20398  
0.20476

gtTCp=

0  
2.385  
1.5979  
1.1196  
0.8287  
0.65143  
0.54309  
0.47655  
0.43538  
0.4096  
0.39316  
0.38239  
0.37506  
0.36982  
0.36585  
0.36266  
0.35995  
0.35753

X\_mask=

0.0022484,2.2204e-016,0.0033748,2.2204e-016,2.2204e-016,2.2204e-016,2.2204e-016,2.2204e-016,0.0033904,0.0072767,2.2204e-016,0.0025844,2.2204e-016,2.2204e-016,2.2204e-016,2.2204e-016,0.0081626,2.2204e-016,0.0040083,2.2204e-016,2.2204e-016,0.0689,2.2204e-016,0.025188,0.00090851,0.0040193,0.0032049,2.2204e-016,2.2204e-016,2.2204e-016,2.2204e-016,0.0020517,0.0091332,0.0051866,0.0072337,2.2204e-016,2.2204e-016,2.2204e-016,0.0028636,0.064381,2.2204e-016,2.2204e-016,2.2204e-016,2.2204e-016,0.027218,0.023869,0.001601,0.0013081,2.2204e-016,2.2204e-016,0.0038673,0.0015719,0.0039682,2.2204e-016,2.2204e-016,2.2204e-016,0.0032644,2.2204e-016,0.0030937,0.0026613,2.2204e-016,0.091546,2.2204e-016,0.0070206,0.018826,2.2204e-016,0.036677,0.012133,2.2204e-016,2.2204e-016,0.038699,0.0077043,2.2204e-016,0.0044587,0.00065803,2.2204e-016,0.0070225,2.2204e-016,0.0019301,2.2204e-016,0.0073831,0.0026638,0.00035379,2.2204e-016,0.0048386,2.2204e-

016, 2.2204e-016, 2.2204e-016, 2.2204e-016, 2.2204e-  
016, 0.029546, 0.01737, 2.2204e-016, 2.2204e-016, 2.2204e-016, 2.2204e-  
016, 0.011752, 0.078041, 0.010882, 2.2204e-016, 0.0022451, 2.2204e-  
016, 2.2204e-016, 2.2204e-016, 2.2204e-016, 0.0059298, 2.2204e-  
016, 0.00074562, 0.00010981, 0.0042638, 0.0012151, 0.0031365, 0.0054541, 0.00  
50368, 0.025076, 2.2204e-016, 0.080776, 2.2204e-016, 2.2204e-  
016, 0.0032023, 2.2204e-016, 2.2204e-016, 0.0020948, 2.2204e-016, 2.2204e-  
016, 2.2204e-016, 0.0067711, 2.2204e-016, 2.2204e-016, 2.2204e-  
016, 0.0060687, 0.0014114, 2.2204e-016, 2.2204e-016, 2.2204e-016, 2.2204e-  
016, 0.0055236, 0.0027509, 2.2204e-016, 0.0023322, 0.0030161, 2.2204e-  
016, 2.2204e-016, 2.2204e-016, 0.020995, 2.2204e-016, 0.086036, 2.2204e-  
016, 2.2204e-016, 2.2204e-  
016, 0.025459, 0.0058511, 0.032885, 0.011673, 2.2204e-  
016, 0.020375, 0.028986, 2.2204e-016, 0.011804, 0.031125, 2.2204e-  
016, 2.2204e-016, 0.0056297, 2.2204e-016, 0.0047471, 2.2204e-016, 2.2204e-  
016, 0.0040121, 0.0035533, 0.0018302, 2.2204e-  
016, 0.00071181, 0.0026275, 2.2204e-016, 2.2204e-016, 2.2204e-016, 2.2204e-  
016, 2.2204e-016, 2.2204e-016, 2.2204e-016, 2.2204e-  
016, 0.044698, 0.074097, 2.2204e-016, 0.024473, 2.2204e-  
016, 0.024806, 0.0056565, 2.2204e-016, 0.033305, 2.2204e-  
016, 0.024244, 2.2204e-016, 2.2204e-016, 2.2204e-  
016, 0.001566, 0.0044695, 0.0035469, 2.2204e-016, 2.2204e-016, 4.6725e-  
005, 2.2204e-016, 2.2204e-016, 2.2204e-016, 2.2204e-  
016, 0.0020137, 0.0056467, 0.0021767, 2.2204e-016, 2.2204e-016, 2.2204e-  
016, 2.2204e-016, 2.2204e-016, 2.2204e-016, 0.050388, 2.2204e-  
016, 0.011187, 2.2204e-016, 0.0091767, 0.02253, 2.2204e-  
016, 0.017905, 2.2204e-  
016, 0.0052956, 0.0074485, 0.024828, 0.015581, 0.0077825, 0.041253, 2.2204e-  
016, 2.2204e-016, 2.2204e-016, 2.2204e-016, 0.010104, 2.2204e-  
016, 0.0095448, 0.004941, 2.2204e-016, 0.0011046, 2.2204e-016, 2.2204e-  
016, 2.2204e-016, 0.0040279, 2.2204e-016, 2.2204e-016, 0.0032189, 2.2204e-  
016, 2.2204e-016, 0.10436, 0.025494, 2.2204e-016, 2.2204e-  
016, 0.039705, 2.2204e-016, 0.023373, 0.012988, 0.025176, 2.2204e-  
016, 0.015912, 2.2204e-016, 2.2204e-  
016, 0.012266, 0.014304, 0.0067384, 0.0047374, 2.2204e-016, 2.2204e-  
016, 2.2204e-016, 0.0014952, 2.2204e-  
016, 0.0025421, 0.01094, 0.0003749, 0.0063387, 2.2204e-016, 2.2204e-  
016, 2.2204e-016, 2.2204e-016, 0.0085379, 0.0011607, 2.2204e-  
016, 0.0031604, 2.2204e-016, 0.0090529, 0.0055232, 2.2204e-  
016, 0.035073, 0.0060492, 2.2204e-016, 2.2204e-  
016, 0.0011137, 0.0082315, 2.2204e-016, 0.01764, 2.2204e-  
016, 0.024236, 0.0051028, 2.2204e-016, 0.011648, 0.031404, 2.2204e-  
016, 2.2204e-016, 2.2204e-016, 2.2204e-016, 0.0059022, 2.2204e-016, 2.2204e-  
016, 0.0038284, 0.0073895, 2.2204e-  
016, 0.0063664, 0.0047578, 0.0016242, 0.0021264, 2.2204e-  
016, 0.0014513, 2.2204e-016, 2.2204e-016, 2.2204e-016, 2.2204e-  
016, 0.0029392, 2.2204e-016, 2.2204e-016, 0.019961, 0.050624, 2.2204e-  
016, 2.2204e-016, 0.079524, 2.2204e-016, 2.2204e-016, 0.021995, 2.2204e-  
016, 2.2204e-016, 2.2204e-016, 0.0044307, 2.2204e-016, 2.2204e-  
016, 0.025154, 2.2204e-016, 2.2204e-016, 2.2204e-016, 2.2204e-016, 2.2204e-  
016, 0.002227, 0.0080358, 0.001333, 2.2204e-016, 2.2204e-  
016, 0.00075391, 0.0037536, 0.0036369, 0.0016803, 9.7979e-

005,0.0037614,0.0087774,2.2204e-016,2.2204e-  
016,0.0016919,0.026193,0.012996,0.063104,2.2204e-016,2.2204e-  
016,2.2204e-016,0.025646,0.0079718,2.2204e-016,0.037519,2.2204e-  
016,0.0051063,2.2204e-016,0.027174,2.2204e-016,2.2204e-016,2.2204e-  
016,2.2204e-016,0.0079457,2.2204e-016,2.2204e-016,0.0011452,2.2204e-  
016,0.00019208,0.0036164,0.0055147,2.2204e-  
016,0.0088094,0.0036161,0.0066894,2.2204e-016,0.011157,9.9742e-  
005,2.2204e-016,2.2204e-016,0.00086911,0.00013777,2.2204e-  
016,0.057526,2.2204e-  
016,0.067276,0.099942,0.055629,0.075538,0.034363,2.2204e-016,2.2204e-  
016,0.02285,2.2204e-016,0.011586,2.2204e-  
016,0.0017367,0.020727,0.026907,0.0055377,2.2204e-016,0.04182,2.2204e-  
016,0.00012818,0.0054423,0.00018004,0.00014433,0.00085781,0.0087797,2.  
2204e-016,2.2204e-016,2.2204e-016,2.2204e-016,2.2204e-016,2.2204e-  
016,2.2204e-016,2.2204e-016,0.0012118,0.0050122,2.2204e-016,2.2204e-  
016,2.2204e-016,0.018331,0.075393,2.2204e-016,0.044119,2.2204e-  
016,2.2204e-016,2.2204e-016,0.040234,2.2204e-016,2.2204e-016,2.2204e-  
016,0.029478,0.023814,2.2204e-016,0.022558,2.2204e-  
016,0.013961,2.2204e-016,0.02945,0.0018836,0.0052651,2.2204e-  
016,0.001488,0.001298,2.2204e-016,0.0041071,2.2204e-  
016,0.0027494,0.0022966,2.2204e-016,2.2204e-016,2.2204e-  
016,0.0035016,0.0017142,0.0061537,0.00054875,2.2204e-016,2.2204e-  
016,0.085403,2.2204e-016,2.2204e-016,2.2204e-016,2.2204e-  
016,0.038386,0.015547,2.2204e-016,2.2204e-016,2.2204e-  
016,0.010912,2.2204e-016,0.017938,2.2204e-016,2.2204e-  
016,0.00085114,2.2204e-016,2.2204e-016,0.032499,0.0019669,2.2204e-  
016,2.2204e-016,0.00048469,0.0024615,0.0009354,2.2204e-  
016,0.0033516,0.00038173,0.0012051,0.0017326,2.2204e-016,2.2204e-  
016,2.2204e-016,2.2204e-016,0.001541,0.00097911,2.2204e-016,2.2204e-  
016,0.0072597,2.2204e-016,2.2204e-016,2.2204e-016,2.2204e-  
016,0.0063423,2.2204e-016,2.2204e-016,2.2204e-016,2.2204e-  
016,0.0076384,2.2204e-016,0.0056087,0.016963,0.0072978,2.2204e-  
016,2.2204e-016,2.2204e-016,2.2204e-016,0.0011046,2.2204e-  
016,0.0018708,0.0044797,2.2204e-016,2.2204e-016,2.2204e-016,2.2204e-  
016,0.00031218,2.2204e-016,0.0043732,0.00062187,0.008985,2.2204e-  
016,2.2204e-016,2.2204e-  
016,0.0018141,0.0075072,0.077169,0.030165,2.2204e-  
016,0.033854,0.12118,0.013176,0.048258,0.043096,0.047995,0.021702,2.22  
04e-016,0.025461,2.2204e-016,0.0042441,2.2204e-  
016,0.00082458,0.0085843,0.0023502,0.022731,2.2204e-016,2.2204e-  
016,0.0052551,0.0027915,0.0037117,0.0030038,0.0025526,0.0015746,2.2204  
e-016,2.2204e-016,2.2204e-016,0.0040803,2.2204e-016,2.2204e-  
016,2.2204e-016,0.0021453,0.0057076,2.2204e-016,2.2204e-016,2.2204e-  
016,2.2204e-016,0.068425,0.0034446,2.2204e-  
016,0.00069565,0.0091966,2.2204e-016,2.2204e-016,2.2204e-  
016,0.029086,0.0060246,2.2204e-016,0.024798,2.2204e-016,2.2204e-  
016,2.2204e-016,2.2204e-016,0.030976,0.030521,2.2204e-  
016,0.00082957,2.2204e-016,2.2204e-016,0.0020535,2.2204e-016,8.1685e-  
006,2.2204e-016,0.0012901,0.001778,2.2204e-  
016,0.0027,0.0037729,2.2204e-016,2.2204e-  
016,0.00044386,0.0033072,2.2204e-016,0.070265,0.022598,2.2204e-  
016,0.012432,0.027089,0.044594,2.2204e-



016,0.013846,0.0066245,0.020703,0.0046888,2.2204e-  
016,0.020588,0.017776,2.2204e-016,0.0042056,2.2204e-016,2.2204e-  
016,2.2204e-016,0.0010216,0.00066516,2.2204e-  
016,0.0060225,0.0052445,0.00035761,2.2204e-  
016,0.0011986,0.0070753,2.2204e-016,0.00030627,0.0013472,2.2204e-  
016,2.2204e-016,0.0038038,0.004175,2.2204e-016,2.2204e-016,2.2204e-  
016,0.0058949,2.2204e-016,2.2204e-016,0.0055208,2.2204e-016,2.2204e-  
016,2.2204e-016,2.2204e-016,0.026083,2.2204e-  
016,0.01734,0.0072841,2.2204e-016,0.025813,2.2204e-016,2.2204e-  
016,2.2204e-016,0.019564,0.0028039,0.0025758,2.2204e-  
016,0.0018672,0.00032161,0.0070365,2.2204e-016,2.2204e-  
016,0.0023288,0.010226,0.0014876,2.2204e-016,2.2204e-  
016,0.0021558,2.2204e-016,2.2204e-016,2.2204e-016,2.2204e-  
016,0.0088222,2.2204e-016,2.2204e-016,2.2204e-016,2.2204e-  
016,0.024726,2.2204e-016,0.0019336,0.022367,0.028818,2.2204e-  
016,2.2204e-016,0.0042197,2.2204e-016,2.2204e-016,0.00034618,2.2204e-  
016,2.2204e-016,2.2204e-016,2.2204e-016,2.2204e-016,2.2204e-  
016,0.0025489,2.2204e-016,0.0029642,0.0043573,0.005879,2.2204e-  
016,0.0038554,2.2204e-016,2.2204e-016,2.2204e-016,0.0046509,2.2204e-  
016,0.0022798,0.0017062,0.0011034,0.053409,0.022947,0.012959,2.2204e-  
016,0.057479,2.2204e-016,0.017126,2.2204e-016,0.0063845,2.2204e-  
016,0.022967,0.0068025,2.2204e-016,2.2204e-016,0.041428,2.2204e-  
016,0.0096642,2.2204e-016,0.0012235,0.0020811,2.2204e-016,2.2204e-  
016,0.00268,0.0038212,0.0052801,0.0041703,2.2204e-016,2.2204e-  
016,0.0019534,0.0033982,2.2204e-016,0.0028245,2.2204e-  
016,0.0029213,1.8672e-005,0.0053597,2.2204e-016,0.0011605,2.2204e-  
016,2.2204e-016,2.2204e-016,2.2204e-016,2.2204e-  
016,0.0050859,0.029891,0.026379,0.024945,2.2204e-016,2.2204e-  
016,2.2204e-016,2.2204e-016,0.04228,0.007759,2.2204e-016,2.2204e-  
016,2.2204e-016,2.2204e-016,0.0032997,2.2204e-  
016,0.00047996,0.00043765,2.2204e-016,2.2204e-016,2.2204e-  
016,0.0038471,0.0014047,0.0038909,2.2204e-016,0.0016372,2.2204e-  
016,0.00064941,2.2204e-  
016,0.0023029,0.00053307,0.00068496,0.0082998,0.0029294,0.0018727,2.22  
04e-016,2.2204e-016,0.0069818,0.024111,2.2204e-016,2.2204e-  
016,0.014421,0.011536,0.023711,0.0049519,0.0022132,2.2204e-  
016,0.0021411,0.0010477,0.0067525,2.2204e-016,2.2204e-016,2.2204e-  
016,0.0033353,0.0034154,0.0018069,0.00062285,2.2204e-  
016,0.0064197,2.2204e-016,2.2204e-  
016,0.0024349,0.0014785,0.0027713,2.2204e-016,2.2204e-016,2.2204e-  
016,2.2204e-016,2.2204e-016,0.0016041,2.2204e-016,2.2204e-016,2.2204e-  
016,0.010012,0.03158,2.2204e-016,0.017719,0.022135,2.2204e-  
016,0.0032445,0.0027723,2.2204e-016,0.0047169,2.2204e-016,2.2204e-  
016,0.0055745,0.0059223,2.2204e-016,0.0042797,2.2204e-016,2.2204e-  
016,0.00061649,2.2204e-016,2.2204e-016,0.00093654,0.00063886,2.2204e-  
016,2.2204e-016,0.0006934,2.2204e-016,2.2204e-016,0.001658,2.2204e-  
016,0.0026536,0.002507,0.00054585,2.2204e-016,2.2204e-  
016,0.030186,0.013337,0.011048,2.2204e-  
016,0.0078947,0.00035224,0.00093651,2.2204e-016,2.2204e-  
016,0.001714,2.2204e-016,2.2204e-  
016,0.0047764,0.00086618,0.00026522,0.0081887,2.2204e-016,2.2204e-  
016,0.0015789,2.2204e-016,2.2204e-016,2.2204e-

016,0.0054997,0.0085495,0.00084381,0.0052648,0.0010947,0.0028558,2.220  
4e-016,0.0031097,2.2204e-016,0.00021527,2.2204e-016,2.2204e-  
016,0.0034967,2.2204e-016,2.2204e-016,2.2204e-016,0.028495,2.2204e-  
016,0.0050194,2.2204e-016,0.00063375,2.2204e-016,0.0010082,2.2204e-  
016,2.2204e-016,0.0037492,2.2204e-016,2.2204e-  
016,0.0058464,0.0019312,0.0065867,2.2204e-016,2.2204e-016,2.2204e-  
016,2.2204e-016,2.2204e-016,0.0034365,2.2204e-016,0.0013249,2.2204e-  
016,0.00040566,0.00073284,2.2204e-016,0.00052855,0.0013165,8.6148e-  
005,0.0026822,2.2204e-016,2.2204e-016,0.0061937,0.0015945,2.2204e-  
016,0.0027804,0.0024011,0.0037182,2.2204e-016,0.0078392,2.2204e-  
016,0.0010863,0.0037613,2.2204e-016,0.00085597,2.2204e-016,2.2204e-  
016,2.2204e-016,0.0026929,2.2204e-016,8.5756e-005,2.2204e-  
016,0.0012636,0.0016328,0.0017029,0.0035474,0.00015203,0.0042224,0.005  
0575,0.0012606,2.2204e-016,0.0014989,0.001972,2.2204e-  
016,0.0015981,2.2204e-016,2.2204e-016,2.2204e-016,2.2204e-016,2.2204e-  
016,0.0043844,2.2204e-016,0.0022398,2.2204e-  
016,0.0026255,0.0047824,2.2204e-016,2.2204e-016,0.00038936,2.2204e-  
016,2.2204e-016,0.0018797,2.2204e-016,0.0028727,2.9722e-005,2.2204e-  
016,0.0020799,2.2204e-016,0.0051043,2.2204e-016,2.2204e-  
016,0.0019284,2.2204e-016,0.00073328,2.2204e-016,0.0032117,2.2204e-  
016,0.0045385,2.2204e-  
016,0.0015304,0.005461,0.0023979,0.00084965,2.2204e-  
016,0.0010242,0.0045125,2.2204e-016,2.2204e-016,2.2204e-  
016,0.00016435,0.0017287,0.0025064,2.2204e-016,0.0071128,2.2204e-  
016,0.0045412,2.2204e-  
016,0.0033492,0.0013911,0.0043254,0.00067861,0.00040749,0.0047798,0.00  
015893,0.0027497,2.2204e-016,0.0030322,2.2204e-016,2.2204e-  
016,2.2204e-016,2.2204e-016,2.2204e-016,0.0026964,2.2204e-  
016,0.0044205,2.2204e-016,0.0034589,0.0042935,0.00094795,2.2204e-  
016,0.0024449,2.2204e-016,0.0025398,2.2204e-016,2.2204e-  
016,0.00026284,9.343e-006,0.0053549,2.2204e-016,2.2204e-016,2.7803e-  
005,2.2204e-016,2.2204e-016,0.0007859,0.0012445,2.2204e-016,2.2204e-  
016,0.0037996,0.0025058,0.0018712,0.0045724,0.00080901,2.2204e-  
016,2.2204e-016,0.0045604,2.2204e-016,2.2204e-016,6.7996e-  
005,0.0011647,2.2204e-016,2.2204e-016,2.2204e-  
016,0.0010378,0.0035374,0.0038504,0.0044828,2.2204e-  
016,0.002731,0.0013783,0.00030325,2.2204e-016,2.2204e-  
016,0.0015729,2.2204e-016,0.0022186,0.00042734,0.0017681,2.2204e-  
016,2.2204e-016,0.0067858,2.2204e-016,2.2204e-016,2.2204e-016,2.2204e-  
016,2.2204e-016,0.00067385,0.00038905,0.0037154,2.2204e-016,2.2204e-  
016,2.2204e-016,0.0022979,0.00089273,2.2204e-016,9.2551e-005,2.2204e-  
016,0.0037352,2.2204e-016,0.0020225,2.2204e-  
016,0.0018792,0.0016318,0.00091268,2.2204e-016,2.2204e-016,2.2204e-  
016,2.2204e-016,0.0039901,2.2204e-  
016,0.0059167,0.0023221,0.0053391,0.0012609,2.2204e-  
016,0.0010101,0.00093719,2.2204e-016,0.00055523,0.003535,2.2204e-  
016,2.2204e-016,0.0028869,0.00060503,0.0043412,0.0026378,1.0387e-  
005,2.2204e-016,2.2204e-016,2.2204e-016,0.0020271,2.2204e-  
016,0.0024479,0.0058865,2.2204e-016,2.2204e-016,2.2204e-016,2.2204e-  
016,0.0018554,2.2204e-016,0.0036754,2.2204e-016,2.2204e-016,2.2204e-  
016,0.0049514,0.0033721,2.2204e-016,2.2204e-016,0.0020871,2.2204e-  
016,2.2204e-016,2.2204e-016,0.0011743,0.00075418,2.2204e-016,2.2204e-

016,2.2204e-016,2.2204e-016,0.004432,8.944e-  
005,0.0010191,0.0025466,2.2204e-016,0.0018382,2.2204e-  
016,0.0005954,2.2204e-016,2.2204e-  
016,0.0025657,0.0024755,0.0033843,0.0010546,2.2204e-  
016,0.0028503,0.0034081,2.2204e-  
016,0.0032044,0.0081752,0.004199,2.2204e-016,0.00067334,9.8559e-  
005,2.2204e-016,0.0028342,2.2204e-016,2.2204e-016,2.2204e-  
016,0.00016964,0.0015863,2.2204e-016,2.2204e-  
016,0.0029823,0.0038041,2.2204e-016,0.00060526,2.2204e-  
016,0.0022203,0.0034299,0.00073952,2.2204e-016,0.0034266,2.2204e-  
016,0.00076175,2.2204e-016,2.2204e-016,2.2204e-016,0.0010023,2.2204e-  
016,0.0023834,2.2204e-016,0.0028828,2.2204e-016,2.2204e-  
016,0.0022286,0.0025531,0.0014244,2.2204e-016,2.2204e-  
016,0.00064109,0.0045715,2.2204e-016,0.0052799,0.0027845,2.2204e-  
016,2.2204e-016,2.2204e-016,0.0046829,2.2204e-  
016,0.005141,0.000963,2.2204e-016,0.00098093,0.0013942  
0.074981,0.061099,0.075901,0.065157,0.072091,0.071078,0.063982,0.06203  
9,0.075527,0.081841,0.06594,0.069856,0.072328,0.069498,0.070531,0.0649  
01,0.073873,0.066362,0.073165,0.06838,1.3595,1.3187,1.2837,1.2583,0.07  
5439,0.075249,0.075576,0.073407,0.064216,0.066589,0.069157,0.073325,0.  
077144,0.077488,0.076087,0.068475,0.06263,0.068525,0.074865,2.4162,1.2  
419,1.1992,1.1963,1.1384,1.2615,1.2667,0.070549,0.070384,0.067733,0.06  
1984,0.076415,0.070357,0.07545,0.067101,0.066123,0.069978,0.073467,0.0  
71357,0.075854,0.07251,0.070095,2.4347,2.321,1.1315,1.4621,1.202,1.342  
,1.2671,1.3646,0.86126,1.291,0.079867,0.065728,0.074154,0.079385,0.069  
335,0.07629,0.067862,0.075372,0.072864,0.072734,0.070406,0.075428,0.07  
1578,0.07488,0.065945,2.2795,2.3525,2.3863,1.1423,1.284,1.0392,1.2136,  
1.204,1.0388,0.81076,1.2625,1.2861,0.077729,0.070899,0.075449,0.072021  
,0.072508,0.069163,0.069629,0.077254,0.062226,0.068695,0.072506,0.0752  
69,0.073534,0.074836,0.079708,0.080602,2.4266,2.3314,2.4766,2.4276,1.4  
078,0.98977,0.99716,1.1984,1.2236,1.1274,1.2609,1.1813,1.2622,1.247,0.  
069101,0.069703,0.078222,0.075683,0.066636,0.067997,0.05827,0.062787,0.  
.073635,0.072768,0.067396,0.078587,0.072318,0.06656,0.069372,0.071882,  
2.4189,2.3447,2.4602,2.3383,2.3737,2.347,1.289,1.3777,1.135,1.2543,1.1  
856,1.2392,1.2741,1.2149,1.1647,1.4418,0.073206,0.067631,0.075066,0.06  
7255,0.073821,0.059008,0.071445,0.072952,0.07427,0.072165,0.067134,0.0  
71424,0.074568,0.072991,0.068423,0.066126,0.070616,2.4099,2.332,2.3459  
,2.3449,2.4366,2.4591,0.83095,1.243,1.0353,1.252,1.271,1.1093,1.1705,1.  
.3437,1.2022,1.2618,1.3061,0.067676,0.068657,0.068298,0.073526,0.06467  
9,0.070681,0.070952,0.062051,0.064399,0.070615,0.069195,0.074547,0.075  
736,0.073966,0.071412,0.070298,0.061356,2.3346,2.3521,2.4217,2.4023,2.  
2664,2.3706,2.3093,1.3335,1.2529,1.4821,1.2706,1.3808,1.4697,1.3694,1.  
0474,1.4489,1.2657,1.1833,0.069146,0.066116,0.073539,0.068646,0.078204  
,0.06279,0.080235,0.075594,0.070312,0.071047,0.071636,0.068128,0.06263  
6,0.074046,0.073408,0.069154,0.07562,0.064747,2.2861,2.484,2.4361,2.33  
49,2.3257,2.4176,2.3462,1.2355,1.4595,1.4513,1.2238,1.2477,1.2078,1.19  
55,1.2544,1.2371,1.2134,1.1448,0.065524,0.068477,0.062823,0.075732,0.0  
57707,0.075691,0.083811,0.073136,0.075936,0.07124,0.069688,0.071117,0.  
069991,0.079385,0.072373,0.0695,0.075241,0.068619,0.081661,2.3683,2.34  
11,2.392,2.3556,2.3284,2.3477,2.3825,1.1112,1.2195,1.2757,1.097,1.258,  
1.2122,1.2186,1.627,1.2676,1.1945,1.196,1.459,0.070577,0.073555,0.0702  
47,0.068947,0.073813,0.07593,0.065284,0.07645,0.079089,0.075251,0.0725

23,0.069953,0.070735,0.064041,0.067977,0.07134,0.071558,0.076103,2.401  
7,2.3251,2.3968,2.4137,2.366,2.2704,2.4756,0.75578,1.3549,1.2017,1.181  
5,1.4765,1.1679,1.3337,1.0539,1.1445,1.2396,1.2157,1.2022,0.067375,0.0  
69793,0.064856,0.076384,0.077842,0.074455,0.072164,0.071265,0.071018,0  
.074832,0.076433,0.072623,0.069577,0.075042,0.082004,0.072542,0.066563  
,0.072417,2.4327,2.3458,2.475,2.3032,2.3779,2.3968,2.3966,2.4077,2.415  
4,1.3853,1.2684,1.0765,1.2,1.264,1.2281,1.2321,1.2124,1.2231,1.2854,1.  
1492,0.070458,0.071833,0.068296,0.071758,0.073267,0.076688,0.071049,0.  
080956,0.072962,0.0763,0.07283,0.086378,0.071595,0.067274,0.068826,0.0  
72792,0.070078,0.07087,2.4556,2.3833,2.4566,2.4424,2.4341,2.4215,2.394  
4,2.3706,2.3801,1.0582,1.2742,1.0037,0.84248,0.87586,0.86478,0.86969,0  
.9189,0.71329,0.97389,0.78983,0.071792,0.075245,0.072032,0.073642,0.07  
3138,0.078893,0.069548,0.068543,0.069173,0.069497,0.071606,0.070056,0.  
071162,0.072337,0.071838,0.078357,0.070109,0.070248,2.3646,2.3696,2.42  
11,2.3031,2.4935,2.2971,2.3175,2.3902,2.4262,1.2016,0.85818,0.86965,0.  
92542,0.9639,0.83553,0.88853,0.96545,0.81415,0.8925,0.89173,0.072593,0  
.076743,0.063565,0.070201,0.072459,0.068075,0.07713,0.070528,0.073859,  
0.072944,0.065604,0.069255,0.072113,0.074314,0.072676,0.079007,0.07271  
4,0.064158,2.4,2.4308,2.2788,2.34,2.3885,2.3894,2.4101,1.1649,1.1861,1  
.1971,0.83975,0.9261,0.81506,0.94939,0.81758,0.78725,0.84932,0.85507,0  
.85203,0.91923,0.074482,0.067658,0.068837,0.071122,0.075616,0.075404,0  
.067648,0.073813,0.071021,0.073436,0.074687,0.066433,0.067733,0.071309  
,0.069655,0.073361,0.070578,0.066528,2.287,2.3666,2.4029,2.4052,2.3516  
,2.2841,1.1192,1.2063,1.2155,1.2314,1.1715,0.91305,0.71415,0.83364,0.9  
1381,0.86518,0.89752,0.82826,0.6312,0.80924,0.072799,0.072144,0.072727  
,0.071193,0.070473,0.068289,0.072184,0.072084,0.07367,0.065866,0.07725  
7,0.073055,0.080348,0.066794,0.066124,0.068483,0.071032,0.078689,2.421  
4,2.4354,2.3846,2.4111,2.4962,1.3486,1.1441,1.2692,1.4967,1.3256,1.306  
3,0.78736,0.56489,0.91665,0.82949,0.72444,0.74718,0.75528,0.95876,1.04  
34,0.070317,0.077129,0.069769,0.073298,0.074383,0.074587,0.072856,0.06  
952,0.067566,0.069636,0.075181,0.071559,0.067418,0.071492,0.074009,0.0  
7641,0.068493,0.074222,2.2923,2.4266,2.4413,1.3351,1.2039,1.1589,1.372  
7,1.3568,1.2073,1.3773,1.2143,0.84883,0.61268,0.92568,0.79119,0.72783,  
1.0391,0.9942,0.87784,0.9017,0.067699,0.072045,0.067627,0.070306,0.073  
297,0.07115,0.071534,0.069056,0.07221,0.075317,0.070412,0.07428,0.0749  
76,0.065865,0.069592,0.073803,0.072228,0.072582,2.4582,1.595,1.2601,1.  
226,1.2847,1.4576,1.1264,1.2373,1.2576,1.3314,0.89962,0.81054,1.1295,0  
.78483,0.82304,0.94028,0.79999,0.90379,0.85171,0.072888,0.072687,0.067  
854,0.078374,0.073666,0.072713,0.074094,0.071973,0.077418,0.072799,0.0  
67853,0.071748,0.068427,0.072319,0.074557,0.07464,0.070097,0.067678,1.  
1913,1.2596,1.1636,1.3841,1.3983,1.2008,1.1338,0.93535,1.2112,1.158,0.  
87013,0.75073,0.83272,0.78631,0.92001,0.73103,0.91603,0.85009,0.86693,  
0.075544,0.077378,0.06842,0.072903,0.072083,0.079131,0.069678,0.067911  
,0.074657,0.084054,0.07447,0.072244,0.07173,0.075583,0.06657,0.07035,0  
.064743,0.07114,1.2353,1.1927,1.1929,1.1549,1.1989,1.3018,1.2488,1.221  
,1.2506,1.1701,0.86458,0.90007,0.79277,0.59803,0.54356,1.0855,0.71616,  
0.83883,0.06296,0.072804,0.070053,0.072336,0.074374,0.071254,0.074762,  
0.075127,0.076062,0.063193,0.075488,0.067586,0.068045,0.063826,0.07471  
5,0.069902,0.074652,0.074051,0.07187,1.3612,1.2529,1.2965,1.1913,1.337  
1,1.3476,1.3139,0.90983,1.1641,1.3446,1.0131,0.61282,0.78971,0.78477,0  
.83515,0.91809,0.88957,0.79778,0.073233,0.072386,0.070216,0.067995,0.0  
75244,0.072876,0.076596,0.07595,0.071857,0.064487,0.073242,0.075401,0.

069925,0.072889,0.069144,0.072887,0.072236,0.075779,0.070834,0.073908,  
1.0782,1.3507,1.2659,1.2009,1.2313,0.49885,0.99808,1.1967,1.2433,0.821  
12,0.84191,0.67603,0.95378,0.90837,0.85381,0.06904,0.065463,0.066099,0  
.069655,0.074234,0.070791,0.070434,0.072041,0.070498,0.069278,0.069694  
,0.07304,0.07229,0.075834,0.072177,0.075963,0.068113,0.072231,0.072251  
,0.072742,0.069534,0.072477,1.4121,1.2397,1.2043,1.3326,1.2345,1.2481,  
1.2528,1.2263,1.2289,0.89519,0.85644,0.87941,0.080109,0.075077,0.06737  
9,0.073373,0.072521,0.076908,0.071162,0.071165,0.067201,0.078785,0.072  
233,0.075803,0.072245,0.069296,0.077528,0.06711,0.070363,0.071888,0.07  
1557,0.071354,0.072244,0.071571,0.069879,0.066612,0.072701,0.072401,1.  
201,1.2179,1.1285,1.2525,1.2448,1.2121,1.3155,1.2954,0.069981,0.072985  
,0.076697,0.072718,0.077764,0.069422,0.06656,0.075768,0.075864,0.06876  
9,0.074691,0.069955,0.067555,0.072113,0.070356,0.065425,0.073366,0.074  
051,0.069128,0.065783,0.07121,0.070334,0.070658,0.070465,0.074089,0.07  
3128,0.076124,0.070809,0.069345,1.3127,1.2642,1.2411,1.2585,1.2147,0.0  
76478,0.07195,0.073666,0.073554,0.070522,0.074239,0.06819,0.071842,0.0  
74664,0.073149,0.073783,0.078118,0.068435,0.069465,0.070605,0.066419,0  
.069477,0.068048,0.075541,0.080583,0.072093,0.074144,0.07158,0.074787,  
0.070307,0.074181,0.070602,0.071236,0.070441,0.069512,0.074714,0.06965  
6,0.071033,0.95688,1.2247,0.072653,0.074466,0.065856,0.072235,0.068262  
,0.07361,0.068558,0.064765,0.074487,0.067115,0.070547,0.075222,0.07259  
8,0.07579,0.071717,0.072095,0.069497,0.069521,0.068828,0.076957,0.0696  
96,0.072205,0.074641,0.071496,0.071982,0.067551,0.074738,0.072818,0.07  
0155,0.07272,0.070349,0.069616,0.077181,0.073456,0.06768,0.073951,0.07  
5367,0.075278,0.069779,0.079325,0.067546,0.073383,0.074353,0.068903,0.  
072335,0.071373,0.069481,0.071779,0.074642,0.067577,0.073201,0.068066,  
0.072851,0.075405,0.071265,0.073919,0.072991,0.076336,0.075946,0.07180  
1,0.06809,0.073575,0.073498,0.071959,0.073266,0.073742,0.069169,0.0708  
05,0.068714,0.064757,0.075859,0.069644,0.074162,0.066393,0.072342,0.07  
5916,0.068539,0.068961,0.070351,0.065994,0.070646,0.072379,0.069018,0.  
071014,0.073189,0.064913,0.073803,0.070757,0.075362,0.069839,0.071939,  
0.074673,0.069092,0.071625,0.072461,0.073616,0.071716,0.075301,0.07076  
1,0.073967,0.075976,0.072887,0.073826,0.067718,0.071611,0.075838,0.071  
492,0.068914,0.073738,0.071684,0.074299,0.074122,0.068205,0.079908,0.0  
71281,0.074617,0.071687,0.073117,0.072388,0.075372,0.072321,0.075629,0  
.075208,0.070916,0.075605,0.069548,0.073898,0.070882,0.070523,0.070911  
,0.071038,0.069805,0.074174,0.069127,0.076795,0.070545,0.075689,0.0763  
05,0.070568,0.069767,0.073935,0.071184,0.072951,0.068805,0.069218,0.07  
2092,0.069463,0.076468,0.067947,0.066117,0.071911,0.070224,0.069597,0.  
073398,0.072304,0.068253,0.069967,0.07587,0.076905,0.069907,0.076926,0  
.072097,0.068737,0.068171,0.073853,0.069887,0.071133,0.07144,0.072812,  
0.068003,0.069413,0.067322,0.074012,0.075982,0.074009,0.076186,0.07087  
8,0.073189,0.072822,0.07086,0.069351,0.070876,0.071115,0.07032,0.07349  
9,0.071387,0.073579,0.071496,0.070326,0.078258,0.065645,0.071413,0.064  
996,0.06925,0.069897,0.071248,0.071879,0.073496,0.072411,0.070747,0.06  
7899,0.071776,0.072221,0.06655,0.071605,0.068476,0.073403,0.069671,0.0  
74866,0.066303,0.071356,0.072978,0.072472,0.069505,0.070557,0.07126,0.  
065406,0.074421,0.072113,0.077101,0.075793,0.075101,0.075172,0.06805,0  
.070309,0.071871,0.067976,0.072735,0.075515,0.066088,0.070698,0.074628  
,0.071467,0.072919,0.076812,0.072222,0.070336,0.072038,0.070883,0.0727  
26,0.069325,0.072415,0.076434,0.067457,0.069757,0.067643,0.071822,0.07  
1808,0.070779,0.077838,0.071323,0.068846,0.069412,0.073663,0.074352,0.

071832,0.06691,0.075005,0.069766,0.072587,0.069338,0.07178,0.070486,0.070513,0.067134,0.068011,0.071218,0.074628,0.071294,0.071144,0.074053,0.072546,0.07339,0.071438,0.07306,0.070849,0.071884,0.075859,0.075621,0.074078,0.071397,0.07075,0.074589,0.076603,0.06481,0.075278,0.079548,0.074477,0.066868,0.070591,0.072189,0.068373,0.076875,0.069085,0.068813,0.065149,0.072629,0.073515,0.071719,0.071613,0.076184,0.07406,0.067173,0.071665,0.069853,0.073287,0.074489,0.073591,0.068666,0.073741,0.071342,0.073578,0.066175,0.07144,0.066157,0.071982,0.067686,0.074558,0.069767,0.073433,0.065804,0.072467,0.075155,0.072138,0.074874,0.066854,0.070053,0.071,0.07761,0.069927,0.076291,0.07616,0.064897,0.072604,0.071377,0.075301,0.06735,0.077233,0.072953,0.070044,0.070688,0.071137  
0.11793,0.10244,0.1208,0.11082,0.11609,0.11423,0.10912,0.10788,0.11977,0.12651,0.11091,0.12014,0.11768,0.11096,0.11882,0.11097,0.11895,0.11707,0.11598,0.1094,0.92385,0.92332,0.8741,0.88599,0.12173,0.11921,0.12091,0.11612,0.10585,0.108,0.11425,0.11593,0.12181,0.12305,0.12009,0.11438,0.10844,0.11372,0.11828,1.6648,0.86552,0.82736,0.84134,0.81164,0.88615,0.86686,0.11381,0.11577,0.11071,0.10672,0.12273,0.11265,0.12156,0.11085,0.11155,0.11747,0.11903,0.11904,0.12288,0.1183,0.11352,1.6598,1.5576,0.79517,1.0031,0.82546,0.94354,0.88877,0.96079,0.62309,0.91373,0.12276,0.10776,0.11586,0.12319,0.1145,0.12229,0.11241,0.11755,0.11844,0.11015,0.11471,0.12058,0.11325,0.11851,0.11734,1.526,1.582,1.5802,0.77432,0.88147,0.76019,0.84478,0.81223,0.71529,0.58802,0.89323,0.91438,0.12299,0.11872,0.12022,0.11363,0.11311,0.11394,0.11147,0.12252,0.1066,0.10994,0.11805,0.12094,0.11795,0.11822,0.12608,0.1197,1.6021,1.5106,1.6271,1.5813,0.96024,0.70052,0.7173,0.85336,0.85046,0.77363,0.86395,0.81497,0.88071,0.85151,0.11829,0.11337,0.11893,0.1173,0.10886,0.11034,0.10418,0.10428,0.1203,0.11538,0.11501,0.1254,0.11359,0.10961,0.11924,0.1153,1.6372,1.5898,1.6597,1.5587,1.582,1.5956,0.91716,0.94398,0.80863,0.88025,0.82004,0.86898,0.89338,0.81958,0.81703,1.0082,0.11875,0.11364,0.12049,0.11342,0.12297,0.10205,0.11655,0.11545,0.12014,0.11809,0.11281,0.11484,0.1168,0.1179,0.1147,0.11103,0.11877,1.6296,1.5345,1.5314,1.6015,1.6449,1.634,0.58753,0.8597,0.71698,0.88715,0.88874,0.779,0.84431,0.91906,0.83743,0.90162,0.88822,0.11105,0.11801,0.11351,0.11944,0.11364,0.11969,0.11493,0.10675,0.1073,0.11393,0.11675,0.11596,0.11537,0.11133,0.11204,0.10895,0.10321,1.5525,1.5641,1.6087,1.6075,1.4854,1.6238,1.5323,0.92078,0.89379,1.0312,0.88741,0.95875,1.0017,0.96704,0.76328,0.99641,0.87614,0.8368,0.11315,0.11398,0.11694,0.11574,0.11993,0.10755,0.1197,0.11882,0.11718,0.11443,0.12018,0.10611,0.098865,0.1133,0.11265,0.10906,0.11329,0.1129,1.5216,1.7055,1.6178,1.5438,1.5345,1.6692,1.5204,0.85867,1.0126,1.0009,0.85508,0.88106,0.84972,0.83757,0.88277,0.8721,0.83391,0.81783,0.10675,0.1187,0.11129,0.11675,0.10073,0.11824,0.12993,0.11734,0.12079,0.11062,0.10788,0.10901,0.10966,0.12043,0.11017,0.10941,0.11251,0.10722,0.12377,1.5592,1.5592,1.5787,1.5638,1.5459,1.5842,1.5638,0.77783,0.84216,0.90216,0.77496,0.91142,0.84825,0.85267,1.1369,0.89328,0.83453,0.83596,1.0022,0.11718,0.11846,0.1133,0.10932,0.11524,0.12267,0.10292,0.11615,0.11699,0.11159,0.11123,0.10539,0.10913,0.10201,0.10491,0.10861,0.10989,0.11358,1.6207,1.5005,1.6366,1.6398,1.5494,1.5059,1.6573,0.53908,0.91967,0.85614,0.81224,1.0274,0.82569,0.93139,0.74419,0.79772,0.86797,0.84459,0.84086,0.11275,0.11494,0.1085,0.11375,0.11407,0.10988,0.11244,0.10987,0.11003,0.11467,0.11465,0.10964,0.10833,0.11101,0.11779,0.10889,0.10635,0.11132,1.6285,1.5556,1.6647,1.5327,1.5783,1.5669,1.591,1.6313,1.5582,0.96145,0.86661,0.74211,0.80697,0.8

7692,0.86981,0.85238,0.83168,0.84847,0.91258,0.80335,0.10755,0.11023,0.10662,0.11011,0.11238,0.11316,0.10933,0.11905,0.11367,0.11414,0.11046,0.12324,0.10856,0.10665,0.10697,0.10949,0.10921,0.10767,1.6653,1.6122,1.6225,1.6285,1.6362,1.6166,1.614,1.5609,1.6209,0.74672,0.84976,0.71454,0.6113,0.61832,0.61907,0.62814,0.64844,0.51895,0.70661,0.55948,0.10914,0.11279,0.10929,0.11207,0.10994,0.11302,0.10933,0.10767,0.10414,0.10765,0.10973,0.10663,0.10857,0.11202,0.10883,0.11682,0.10824,0.10883,1.5645,1.5788,1.6301,1.5135,1.7094,1.5279,1.545,1.5673,1.637,0.80818,0.61434,0.62502,0.67704,0.70436,0.60165,0.63814,0.67577,0.59431,0.62727,0.6475,0.10881,0.11557,0.10678,0.10762,0.11177,0.10494,0.11584,0.11109,0.11369,0.10943,0.10836,0.10689,0.10977,0.11102,0.11016,0.11552,0.11168,0.10342,1.594,1.6627,1.5225,1.5949,1.5861,1.6059,1.6039,0.80978,0.82583,0.82163,0.6095,0.6645,0.58796,0.68657,0.58087,0.56824,0.60456,0.62213,0.61259,0.65064,0.11071,0.10645,0.10755,0.10852,0.11562,0.11298,0.10628,0.1149,0.11194,0.10989,0.11005,0.10386,0.107,0.11036,0.10871,0.11742,0.11027,0.10402,1.4891,1.5805,1.6173,1.6188,1.5128,1.5107,0.7766,0.85388,0.84627,0.84722,0.80538,0.65509,0.52646,0.59483,0.6587,0.60826,0.63725,0.59562,0.47466,0.59276,0.11222,0.11019,0.10771,0.1125,0.10894,0.10616,0.10861,0.10903,0.11057,0.10472,0.11743,0.10971,0.11667,0.10646,0.10559,0.10626,0.10971,0.11598,1.6247,1.6304,1.5531,1.5948,1.7193,0.93442,0.8122,0.88699,1.0464,0.91287,0.91255,0.57558,0.42323,0.65688,0.59202,0.53491,0.53648,0.55345,0.69791,0.73208,0.10756,0.11399,0.10966,0.11325,0.11391,0.11345,0.11384,0.10794,0.10756,0.1077,0.11247,0.11069,0.10499,0.1103,0.11086,0.11219,0.10687,0.11395,1.5065,1.652,1.6362,0.93703,0.83206,0.80142,0.96712,0.92077,0.82272,0.94272,0.86621,0.61874,0.45837,0.66354,0.56755,0.53199,0.73263,0.69811,0.63522,0.65183,0.10231,0.11148,0.10668,0.11206,0.1127,0.11209,0.10958,0.11303,0.10987,0.11519,0.10892,0.11344,0.11384,0.10567,0.10692,0.11153,0.10993,0.11096,1.6672,1.0913,0.85476,0.82887,0.87363,0.99877,0.79207,0.84936,0.87599,0.92584,0.62205,0.57577,0.80428,0.56832,0.59083,0.6564,0.5907,0.65632,0.61128,0.11142,0.10954,0.10558,0.11528,0.11273,0.11115,0.11238,0.11002,0.11471,0.111,0.10883,0.10773,0.10901,0.10991,0.11277,0.11024,0.10582,0.098133,0.82077,0.85818,0.81629,0.93536,0.94264,0.84468,0.76625,0.65785,0.84619,0.79691,0.63281,0.55723,0.60359,0.58408,0.66237,0.52545,0.64549,0.59871,0.61782,0.11382,0.11389,0.10689,0.11395,0.11065,0.11639,0.10746,0.10451,0.11158,0.11843,0.11515,0.11142,0.10971,0.11446,0.10509,0.11088,0.10462,0.10626,0.8581,0.8406,0.84807,0.77282,0.82392,0.87771,0.86587,0.86205,0.87268,0.8228,0.61796,0.61583,0.57246,0.45042,0.41395,0.78685,0.52472,0.59458,0.10024,0.11184,0.11193,0.11069,0.11089,0.10923,0.11289,0.11445,0.11342,0.10316,0.11448,0.1078,0.10694,0.10532,0.11597,0.11022,0.11143,0.10819,0.10431,0.94643,0.87862,0.90077,0.82502,0.94177,0.93289,0.91136,0.62264,0.80474,0.90894,0.7126,0.45529,0.57457,0.55811,0.60308,0.66596,0.63927,0.57007,0.11372,0.11003,0.11115,0.10522,0.11101,0.11099,0.11553,0.11179,0.11001,0.099955,0.11046,0.11305,0.10934,0.1087,0.10773,0.11169,0.1135,0.10868,0.10261,0.10741,0.74521,0.91062,0.86369,0.83465,0.85252,0.37541,0.71043,0.85751,0.8738,0.58966,0.57702,0.50433,0.68279,0.65352,0.60106,0.10678,0.10561,0.1032,0.1069,0.1138,0.1087,0.11324,0.10792,0.10902,0.10725,0.10663,0.11525,0.11318,0.11296,0.11159,0.11573,0.1068,0.10901,0.10306,0.10423,0.10036,0.10277,0.97109,0.87628,0.84574,0.90713,0.85294,0.88859,0.88471,0.83901,0.87732,0.62577,0.6168,0.63604,0.11784,0.11251,0.10896,0.11081,0.11175,0.11722,0.10632,0.1088,0.1075,0.11707,0.11354,0.11455,0.10842,0.10694,0.

11457,0.10528,0.1079,0.11152,0.10926,0.10829,0.1036,0.10358,0.10192,0.  
099648,0.10458,0.10708,0.82437,0.82837,0.78482,0.87637,0.87095,0.83489  
,0.90206,0.89628,0.10977,0.10808,0.11575,0.11016,0.11507,0.11127,0.104  
14,0.11515,0.11326,0.10684,0.11192,0.10835,0.10774,0.11021,0.10915,0.1  
0548,0.11304,0.11017,0.10784,0.10478,0.1123,0.10954,0.10612,0.10351,0.  
10669,0.10426,0.10691,0.10351,0.10267,0.85543,0.87529,0.86766,0.86459,  
0.86004,0.10815,0.10143,0.11076,0.11036,0.10563,0.11391,0.10719,0.1111  
6,0.10854,0.11065,0.11207,0.11534,0.10854,0.11017,0.111,0.10401,0.1076  
3,0.10742,0.11575,0.12108,0.11201,0.10981,0.10464,0.10684,0.10374,0.10  
417,0.10201,0.1027,0.10163,0.10156,0.10721,0.10275,0.10348,0.66785,0.8  
5303,0.10378,0.10465,0.099539,0.10454,0.10804,0.1124,0.10522,0.10423,0  
.11423,0.10609,0.11136,0.11289,0.11148,0.11261,0.10971,0.11014,0.10703  
,0.10803,0.10548,0.11404,0.11011,0.11208,0.11484,0.10212,0.10438,0.102  
76,0.10631,0.1067,0.10291,0.10596,0.10058,0.099035,0.10691,0.10505,0.1  
0243,0.10557,0.10638,0.10605,0.10188,0.11142,0.10475,0.11335,0.10964,0  
.10708,0.11044,0.11033,0.10724,0.11008,0.11121,0.10534,0.1135,0.10407,  
0.11182,0.11068,0.10969,0.10953,0.10313,0.11149,0.10782,0.10239,0.0988  
62,0.10494,0.1055,0.10489,0.10497,0.10596,0.10138,0.10479,0.10285,0.09  
7786,0.10625,0.10175,0.10416,0.099928,0.10583,0.11597,0.10664,0.10757,  
0.10779,0.1043,0.10986,0.11269,0.1064,0.11445,0.11061,0.10452,0.11374,  
0.11012,0.10411,0.10053,0.1035,0.10692,0.10258,0.10327,0.10297,0.10404  
,0.10383,0.10916,0.10452,0.10323,0.10597,0.10752,0.10461,0.10096,0.101  
55,0.10759,0.10487,0.10275,0.10474,0.11082,0.11296,0.11097,0.10806,0.1  
1526,0.11089,0.113,0.10954,0.11264,0.10339,0.10685,0.10454,0.1072,0.10  
561,0.10141,0.10754,0.10352,0.10682,0.10493,0.10171,0.10362,0.10303,0.  
10309,0.10611,0.099947,0.10673,0.10387,0.10827,0.10883,0.10387,0.10233  
,0.10582,0.10154,0.10618,0.10819,0.10563,0.10746,0.10972,0.10691,0.098  
979,0.097904,0.10393,0.10342,0.098697,0.1037,0.10318,0.10105,0.10307,0  
.10588,0.10724,0.10263,0.11123,0.103,0.1019,0.099469,0.10445,0.1024,0.  
1028,0.10568,0.10618,0.10074,0.10275,0.097769,0.1034,0.10577,0.10508,0  
.10784,0.10341,0.10632,0.10631,0.10429,0.10169,0.10261,0.10181,0.10218  
,0.1047,0.10413,0.10622,0.10329,0.103,0.1106,0.099206,0.10273,0.098277  
,0.10227,0.1019,0.10348,0.10353,0.10322,0.10522,0.10361,0.10063,0.1040  
4,0.10335,0.10088,0.10504,0.10043,0.1061,0.10202,0.10832,0.10184,0.102  
91,0.10548,0.10586,0.10259,0.1022,0.10385,0.097611,0.10641,0.10432,0.1  
1005,0.10789,0.10798,0.10823,0.10152,0.1032,0.10409,0.099955,0.10527,0  
.10747,0.098296,0.10083,0.10624,0.10341,0.10422,0.10852,0.1051,0.1007,  
0.10074,0.10328,0.10378,0.10218,0.10436,0.1087,0.10134,0.10113,0.09960  
4,0.10306,0.10234,0.10411,0.10876,0.10051,0.10043,0.10169,0.10575,0.10  
407,0.10369,0.099247,0.10598,0.10283,0.10321,0.10102,0.1071,0.10258,0.  
1028,0.10016,0.099972,0.10365,0.10874,0.10371,0.1029,0.10668,0.10327,0  
.10509,0.10237,0.10598,0.10324,0.10423,0.10713,0.10681,0.1062,0.10317,  
0.10283,0.10496,0.10732,0.09914,0.10745,0.11104,0.10522,0.096571,0.103  
61,0.10399,0.10275,0.10732,0.10211,0.10111,0.098027,0.10467,0.10548,0.  
10241,0.10395,0.10673,0.10628,0.098783,0.10336,0.10183,0.10479,0.10772  
,0.10366,0.10106,0.10788,0.10448,0.10481,0.099578,0.10494,0.097416,0.1  
0382,0.10077,0.10313,0.099789,0.10394,0.099327,0.1046,0.10602,0.10439,  
0.10728,0.10047,0.10279,0.10237,0.11053,0.10195,0.10841,0.10633,0.0966  
62,0.10203,0.10255,0.10707,0.10051,0.10993,0.10354,0.10352,0.10304,0.1  
0546  
0.1465,0.13137,0.14536,0.14086,0.1391,0.1396,0.13724,0.13635,0.14772,0  
.15535,0.14164,0.15067,0.14387,0.14143,0.14447,0.13997,0.14562,0.14205



,0.14099,0.13881,0.63549,0.69246,0.67235,0.65468,0.14822,0.14693,0.14701,0.14369,0.13212,0.13815,0.14228,0.14215,0.15191,0.15346,0.1502,0.14075,0.1393,0.14094,0.14572,1.1935,0.61504,0.59191,0.60227,0.61461,0.65708,0.61879,0.14633,0.14181,0.13979,0.1359,0.14469,0.14673,0.14735,0.13624,0.13661,0.14866,0.14126,0.14747,0.14664,0.14795,0.14127,1.1852,1.1123,0.57562,0.73912,0.62441,0.70251,0.64156,0.67244,0.47998,0.69677,0.14941,0.13792,0.14578,0.15175,0.14527,0.14806,0.14085,0.14971,0.14383,0.13794,0.14497,0.14937,0.14192,0.14793,0.14548,1.0794,1.1263,1.1071,0.57235,0.65917,0.56806,0.61503,0.58222,0.51771,0.46992,0.67618,0.68977,0.14965,0.14567,0.14966,0.14044,0.13761,0.13832,0.14112,0.15003,0.13758,0.13838,0.14722,0.14809,0.14187,0.15165,0.15637,0.14772,1.1487,1.0549,1.1808,1.0693,0.68268,0.53104,0.54332,0.64526,0.63452,0.56232,0.63882,0.59707,0.65622,0.62596,0.14316,0.14541,0.14866,0.14826,0.14281,0.13831,0.13357,0.13239,0.146,0.14646,0.14947,0.15108,0.14187,0.13967,0.14768,0.13702,1.1765,1.1153,1.1636,1.091,1.0897,1.1045,0.69854,0.6757,0.61339,0.67048,0.60715,0.64336,0.67528,0.58866,0.60861,0.71878,0.14748,0.14238,0.14609,0.14154,0.14789,0.12753,0.14423,0.1457,0.14631,0.14585,0.14048,0.14596,0.14709,0.14872,0.1453,0.13664,0.14302,1.1372,1.0739,1.0593,1.1061,1.1589,1.1612,0.45688,0.62365,0.53328,0.66275,0.66596,0.58102,0.64459,0.64983,0.62005,0.65891,0.65026,0.14186,0.1478,0.14127,0.14425,0.14083,0.14728,0.1405,0.13361,0.13992,0.14334,0.14661,0.14006,0.14179,0.13182,0.13524,0.12707,0.13395,1.0636,1.1045,1.1016,1.1422,1.0083,1.1561,1.0812,0.67402,0.66979,0.7277,0.65406,0.6802,0.73297,0.7082,0.58142,0.74187,0.66331,0.62953,0.14196,0.14473,0.14677,0.14155,0.15019,0.1359,0.15233,0.14289,0.14451,0.14391,0.14408,0.12552,0.11962,0.13226,0.1305,0.12693,0.1308,0.14339,1.041,1.21,1.1358,0.99693,1.0489,1.2226,1.0316,0.62795,0.75188,0.74128,0.62506,0.66496,0.61597,0.62681,0.65659,0.64066,0.60406,0.62399,0.13914,0.14781,0.14,0.14288,0.13386,0.14269,0.15529,0.14305,0.1462,0.13238,0.12431,0.1309,0.13152,0.13355,0.12841,0.12911,0.13055,0.12549,0.14758,1.0839,1.0698,1.0607,1.127,1.026,1.1318,1.0783,0.59714,0.6138,0.69053,0.592,0.68116,0.65499,0.63073,0.8058,0.67667,0.62585,0.61864,0.69617,0.14919,0.14987,0.1402,0.1378,0.14226,0.1476,0.1214,0.13558,0.13971,0.13125,0.1303,0.12606,0.12845,0.11689,0.12283,0.12624,0.12876,0.13502,1.1682,1.0198,1.14,1.169,1.087,1.0443,1.1652,0.42167,0.64031,0.64373,0.61309,0.75614,0.60514,0.67309,0.56395,0.58429,0.64341,0.63793,0.59685,0.14597,0.14572,0.13519,0.13411,0.132,0.1288,0.1326,0.12956,0.12746,0.13414,0.13549,0.13085,0.13082,0.12946,0.13597,0.13197,0.12721,0.12966,1.1643,1.0518,1.148,1.0622,1.0697,1.1189,1.1266,1.1118,1.1025,0.67041,0.61584,0.54333,0.5798,0.65206,0.64814,0.6261,0.60589,0.61902,0.6618,0.60592,0.12759,0.13037,0.12684,0.1307,0.13021,0.13409,0.12895,0.13687,0.1338,0.13277,0.12652,0.14317,0.12495,0.12571,0.12293,0.12832,0.12785,0.12633,1.1253,1.1448,1.1769,1.1653,1.1226,1.1103,1.1377,1.0966,1.1324,0.5662,0.58888,0.55224,0.46604,0.46882,0.47217,0.48153,0.50265,0.39855,0.52784,0.42734,0.12957,0.13261,0.1273,0.1294,0.13233,0.1309,0.12684,0.12826,0.12305,0.12687,0.1353,0.12574,0.12957,0.13013,0.13053,0.13823,0.12763,0.12727,1.1144,1.1254,1.1647,1.0146,1.2444,1.0478,1.0532,1.0829,1.1406,0.58982,0.46909,0.46432,0.49844,0.51412,0.44877,0.48248,0.48952,0.4534,0.47008,0.48952,0.12746,0.13767,0.12879,0.12689,0.13043,0.12396,0.13335,0.13108,0.13134,0.12625,0.13166,0.12291,0.12949,0.12751,0.12892,0.13569,0.13166,0.12086,1.1569,1.134,1.0582,1.094,1.16,1.1024,1.1192,0.58108,0.61658,0.59269,0.46922,0.50445,0.4397,0.52225,0.43167,0.42768,0.46155,0.4782,0.47239,

0.49843,0.12708,0.12499,0.12761,0.1275,0.13202,0.13229,0.12643,0.13421  
,0.13106,0.12933,0.13063,0.12685,0.1276,0.12928,0.12852,0.13653,0.1301  
2,0.12158,1.0482,1.1234,1.113,1.1249,1.0612,1.0806,0.56282,0.60518,0.6  
036,0.64036,0.58978,0.50379,0.39694,0.4582,0.48794,0.46414,0.48198,0.4  
4876,0.38063,0.45604,0.13143,0.12873,0.12557,0.13261,0.13099,0.12696,0  
.13043,0.12636,0.12745,0.12178,0.1371,0.12799,0.13584,0.12774,0.12464,  
0.12534,0.12976,0.135,1.1444,1.1343,1.0908,1.136,1.1966,0.67061,0.5937  
7,0.65624,0.76114,0.6541,0.66506,0.44498,0.32431,0.48835,0.45549,0.407  
47,0.4064,0.43635,0.51683,0.5322,0.12717,0.13203,0.12752,0.13696,0.132  
68,0.13198,0.13245,0.12793,0.12651,0.12716,0.1308,0.13217,0.12208,0.12  
742,0.12965,0.13017,0.12635,0.13169,1.0098,1.1832,1.1805,0.6742,0.5860  
4,0.56549,0.72275,0.64293,0.57422,0.67264,0.64175,0.45973,0.36436,0.50  
799,0.43756,0.40629,0.53351,0.51027,0.49217,0.5157,0.12114,0.13182,0.1  
2606,0.13019,0.12976,0.13084,0.12902,0.13373,0.12998,0.13193,0.1261,0.  
13443,0.13486,0.12575,0.12385,0.12992,0.128,0.1305,1.1692,0.79383,0.61  
649,0.62091,0.64287,0.71997,0.57356,0.61275,0.64211,0.67086,0.46296,0.  
44355,0.60065,0.43668,0.44463,0.48815,0.43773,0.49322,0.46447,0.13121,  
0.13099,0.12663,0.1346,0.13135,0.13325,0.12989,0.1294,0.13148,0.13166,  
0.12911,0.12642,0.12752,0.13189,0.13204,0.1276,0.12715,0.10779,0.60712  
,0.61749,0.61721,0.66751,0.66642,0.60853,0.55146,0.4839,0.61793,0.5852  
4,0.48134,0.43714,0.46568,0.44605,0.50784,0.39114,0.48122,0.4632,0.476  
53,0.13427,0.13211,0.12535,0.1335,0.13026,0.13448,0.12605,0.12375,0.13  
023,0.1336,0.13484,0.12955,0.12836,0.13413,0.1262,0.13013,0.12752,0.11  
808,0.63469,0.61152,0.63366,0.53134,0.59722,0.61207,0.60766,0.63522,0.  
64037,0.5833,0.48612,0.45924,0.44995,0.3596,0.33457,0.59501,0.40449,0.  
42801,0.12064,0.12934,0.13099,0.13061,0.12758,0.12576,0.13078,0.1324,0  
.13208,0.12637,0.13396,0.1296,0.12594,0.12626,0.13511,0.12964,0.12736,  
0.1249,0.11433,0.68318,0.63784,0.65952,0.60962,0.69366,0.67816,0.64843  
,0.45961,0.5693,0.65593,0.53352,0.35726,0.43202,0.41321,0.47255,0.5302  
8,0.49055,0.42652,0.13331,0.12583,0.13301,0.12118,0.12633,0.12962,0.13  
429,0.12996,0.1323,0.12019,0.13209,0.13005,0.12778,0.12723,0.12393,0.1  
3173,0.13584,0.12002,0.11372,0.11874,0.52841,0.68635,0.6231,0.58908,0.  
6241,0.29875,0.5278,0.64129,0.62344,0.43714,0.41385,0.39192,0.51641,0.  
49745,0.44077,0.12273,0.12593,0.12296,0.12503,0.13255,0.1301,0.1288,0.  
12875,0.12847,0.12411,0.12466,0.13614,0.13302,0.1307,0.12915,0.13308,0  
.12583,0.12502,0.11353,0.11549,0.11206,0.11376,0.69973,0.65074,0.63431  
,0.6764,0.62797,0.65251,0.6404,0.6262,0.64584,0.46928,0.44728,0.48115,  
0.13787,0.13294,0.13458,0.12994,0.12998,0.13738,0.12451,0.12824,0.1271  
9,0.1355,0.1363,0.13238,0.12875,0.1237,0.13472,0.12531,0.12557,0.13229  
,0.12829,0.12444,0.11373,0.11563,0.11318,0.11022,0.11423,0.1189,0.5737  
8,0.59129,0.54352,0.65708,0.64024,0.60467,0.66243,0.66224,0.12991,0.12  
811,0.1338,0.12976,0.13306,0.13361,0.12442,0.13607,0.13491,0.12837,0.1  
3341,0.12513,0.1299,0.12569,0.12898,0.12689,0.13287,0.12986,0.12974,0.  
12439,0.1309,0.13013,0.12394,0.11451,0.11898,0.11502,0.11507,0.11515,0  
.11404,0.61383,0.63169,0.66859,0.6074,0.63038,0.11848,0.11391,0.13093,  
0.13007,0.12459,0.13362,0.12246,0.13008,0.12479,0.12841,0.13094,0.1327  
3,0.12809,0.13037,0.13048,0.12681,0.12507,0.12845,0.13308,0.14026,0.13  
294,0.13096,0.12211,0.11674,0.11511,0.1152,0.11057,0.11407,0.11111,0.1  
1004,0.11558,0.11261,0.11436,0.4915,0.6175,0.11335,0.11555,0.11244,0.1  
1382,0.12954,0.13145,0.12566,0.12546,0.13646,0.12977,0.1318,0.13178,0.  
13176,0.13163,0.12964,0.12907,0.12731,0.12924,0.12123,0.12815,0.13084,  
0.13096,0.1326,0.11279,0.11586,0.11182,0.11584,0.11837,0.11316,0.11777

,0.11023,0.11173,0.11721,0.11599,0.1141,0.11693,0.11484,0.11442,0.1123  
2,0.12153,0.13028,0.13488,0.12724,0.12953,0.12911,0.12759,0.12582,0.13  
252,0.12779,0.1246,0.13356,0.12351,0.13108,0.12914,0.128,0.12969,0.114  
98,0.12143,0.11876,0.11184,0.1096,0.11702,0.11451,0.11318,0.11547,0.11  
597,0.10995,0.11595,0.11718,0.10953,0.11692,0.11307,0.11458,0.11131,0.  
11685,0.13467,0.12798,0.1253,0.12796,0.12503,0.12703,0.13409,0.12392,0  
.13889,0.1294,0.12415,0.12984,0.12989,0.11509,0.11177,0.11332,0.11788,  
0.11333,0.11307,0.11262,0.11484,0.11507,0.11795,0.11466,0.11434,0.1176  
6,0.11894,0.11473,0.11389,0.1114,0.11634,0.11529,0.11208,0.11436,0.130  
38,0.13295,0.12841,0.12852,0.13466,0.12863,0.1328,0.1288,0.13396,0.112  
38,0.11513,0.11632,0.11686,0.11267,0.11299,0.11774,0.11722,0.11832,0.1  
1411,0.11253,0.11343,0.11346,0.11416,0.11573,0.11273,0.11722,0.11583,0  
.1179,0.11897,0.11414,0.11443,0.11706,0.1134,0.11796,0.1272,0.12514,0.  
12692,0.12964,0.11645,0.11119,0.10811,0.11477,0.11463,0.10999,0.1123,0  
.11279,0.11175,0.113,0.11496,0.11606,0.11223,0.12077,0.11309,0.11358,0  
.11144,0.11582,0.11413,0.11328,0.11491,0.11509,0.11118,0.11398,0.11092  
,0.116,0.11758,0.11533,0.11646,0.1165,0.11604,0.11488,0.11341,0.11331,  
0.11237,0.11238,0.11377,0.11524,0.11738,0.11489,0.11435,0.11549,0.1193  
9,0.1101,0.11381,0.11119,0.11343,0.11415,0.11367,0.11364,0.11364,0.114  
78,0.11514,0.1122,0.1155,0.11242,0.11143,0.11623,0.10987,0.11581,0.112  
12,0.11672,0.11468,0.11362,0.11716,0.11806,0.11457,0.11303,0.11242,0.1  
0946,0.11817,0.11445,0.1198,0.11876,0.11862,0.11852,0.11357,0.11375,0.  
11553,0.11243,0.116,0.11834,0.11072,0.11304,0.11676,0.11496,0.11359,0.  
1193,0.11624,0.11311,0.11095,0.11284,0.11602,0.11435,0.11498,0.12067,0  
.11431,0.11059,0.11031,0.11392,0.115,0.11628,0.11984,0.11403,0.11212,0  
.11233,0.11703,0.11508,0.11404,0.11002,0.11532,0.11337,0.11457,0.11314  
,0.11759,0.11148,0.11466,0.11021,0.11217,0.1148,0.11949,0.11389,0.1129  
4,0.11787,0.11301,0.11268,0.11412,0.11906,0.11194,0.11472,0.11716,0.11  
885,0.11626,0.11326,0.11348,0.11694,0.11816,0.10915,0.11692,0.12021,0.  
11569,0.10589,0.11562,0.11412,0.11215,0.11642,0.11574,0.11206,0.11003,  
0.11452,0.11429,0.11292,0.11412,0.11567,0.11579,0.10699,0.11157,0.1139  
8,0.11429,0.11884,0.11581,0.11082,0.11903,0.11504,0.11678,0.11318,0.11  
494,0.10811,0.11382,0.11292,0.11393,0.11079,0.11249,0.10806,0.11779,0.  
11789,0.11488,0.11754,0.11207,0.1148,0.11127,0.11938,0.11269,0.12059,0  
.11718,0.10718,0.11306,0.11154,0.11635,0.11155,0.1193,0.1147,0.1141,0.  
11208,0.11435  
0.16315,0.147,0.1608,0.16181,0.15643,0.15881,0.15477,0.15495,0.16494,0  
.17076,0.16038,0.16981,0.16078,0.15767,0.15675,0.1582,0.16104,0.15752,  
0.1567,0.15846,0.45373,0.54178,0.52328,0.4937,0.16683,0.16858,0.16755,  
0.16191,0.15262,0.15424,0.15661,0.16201,0.16962,0.16965,0.16451,0.1584  
8,0.15699,0.16143,0.1656,0.88799,0.47338,0.4659,0.48099,0.47633,0.5126  
1,0.46578,0.16442,0.15977,0.15895,0.15505,0.16328,0.16867,0.16486,0.15  
542,0.15225,0.16639,0.1556,0.1668,0.16813,0.1652,0.15736,0.89686,0.762  
57,0.459,0.57783,0.50789,0.55814,0.51823,0.52955,0.39142,0.56956,0.166  
78,0.14819,0.16002,0.17042,0.16656,0.1673,0.15515,0.16717,0.16071,0.16  
134,0.16182,0.16709,0.15997,0.15819,0.16337,0.8116,0.84729,0.84278,0.4  
3826,0.5341,0.42844,0.47555,0.45882,0.42313,0.3923,0.52533,0.5472,0.16  
933,0.16212,0.16453,0.15737,0.15619,0.1595,0.15535,0.1655,0.15548,0.15  
394,0.16375,0.16755,0.15949,0.16809,0.17216,0.16762,0.85232,0.7518,0.8  
4363,0.78417,0.53845,0.41538,0.45472,0.51804,0.49554,0.43061,0.49206,0  
.46163,0.50584,0.47862,0.15994,0.16461,0.16488,0.16422,0.16067,0.16047  
,0.15083,0.15288,0.16478,0.16226,0.16937,0.16717,0.15845,0.15869,0.161

63,0.15753,0.87799,0.82855,0.88684,0.77927,0.81582,0.82632,0.56593,0.4  
9931,0.48308,0.53614,0.45708,0.51038,0.52983,0.43895,0.48764,0.53879,0  
.16224,0.16428,0.16581,0.15752,0.16736,0.14498,0.16454,0.15913,0.16542  
,0.16631,0.15842,0.16056,0.1671,0.16445,0.15981,0.15277,0.15889,0.8756  
4,0.82128,0.76764,0.83776,0.83405,0.82886,0.37309,0.47892,0.41827,0.52  
224,0.512,0.4723,0.51297,0.49209,0.47857,0.52213,0.48606,0.15618,0.166  
24,0.15784,0.16575,0.16214,0.16539,0.15419,0.15171,0.16172,0.15612,0.1  
6339,0.15827,0.161,0.13966,0.14404,0.13823,0.15018,0.7909,0.80958,0.82  
798,0.83961,0.71713,0.86705,0.78021,0.52277,0.53148,0.54306,0.53222,0.  
5217,0.5695,0.55018,0.4791,0.56989,0.51235,0.49958,0.15902,0.16445,0.1  
6198,0.15842,0.16713,0.15378,0.17311,0.1608,0.16393,0.162,0.16348,0.13  
763,0.13129,0.14194,0.14105,0.13326,0.13872,0.16582,0.77134,0.95761,0.  
82094,0.71438,0.79008,0.91414,0.75434,0.48083,0.59384,0.57293,0.49767,  
0.53849,0.47233,0.47239,0.49723,0.50033,0.47325,0.51878,0.15878,0.1665  
2,0.15604,0.15809,0.15079,0.15976,0.17133,0.16099,0.16534,0.14263,0.13  
169,0.14004,0.14227,0.13919,0.13459,0.13916,0.13696,0.13612,0.16552,0.  
76697,0.81498,0.77408,0.88455,0.76496,0.83561,0.79967,0.45807,0.45751,  
0.54159,0.45859,0.53369,0.50957,0.50362,0.62571,0.5421,0.49103,0.48662  
,0.52719,0.17034,0.16877,0.15739,0.15295,0.15805,0.16365,0.13027,0.144  
46,0.14714,0.13684,0.13714,0.13562,0.13532,0.1237,0.1323,0.13345,0.138  
57,0.14464,0.88552,0.71763,0.86252,0.91216,0.79004,0.76135,0.83885,0.3  
5139,0.49513,0.49138,0.49241,0.59235,0.45532,0.51241,0.44528,0.44614,0  
.51043,0.49489,0.4645,0.16237,0.16686,0.15449,0.14177,0.14127,0.13939,  
0.14023,0.13741,0.13397,0.14401,0.14606,0.13817,0.13703,0.13995,0.1420  
7,0.14101,0.13887,0.13581,0.8694,0.73251,0.8647,0.7682,0.75773,0.8596,  
0.79714,0.84021,0.81825,0.49845,0.48555,0.43976,0.44258,0.51839,0.5177  
5,0.49998,0.45992,0.50427,0.54256,0.4839,0.13753,0.13909,0.13707,0.138  
23,0.13854,0.14125,0.13919,0.14404,0.14396,0.14168,0.1335,0.15058,0.13  
245,0.13122,0.13288,0.13931,0.13515,0.13624,0.86406,0.88677,0.89244,0.  
90372,0.88286,0.83424,0.83346,0.8135,0.83717,0.46737,0.42833,0.42903,0  
.37549,0.37306,0.39276,0.38646,0.39848,0.32189,0.43614,0.33946,0.13745  
,0.13977,0.13715,0.13838,0.14284,0.13948,0.1359,0.13638,0.13279,0.1347  
6,0.14342,0.13344,0.13859,0.13723,0.13747,0.14648,0.13919,0.13729,0.82  
609,0.74511,0.87288,0.71921,0.94506,0.72824,0.79833,0.83213,0.82613,0.  
45292,0.37467,0.37847,0.39877,0.41504,0.34417,0.38964,0.38007,0.38205,  
0.37057,0.41241,0.13379,0.14544,0.14029,0.13483,0.13859,0.13522,0.1421  
1,0.14023,0.14068,0.1335,0.14421,0.13168,0.14031,0.13358,0.13538,0.146  
41,0.13707,0.13216,0.83171,0.86089,0.78665,0.80051,0.89809,0.80821,0.8  
5496,0.44425,0.45824,0.46203,0.37653,0.40475,0.35739,0.42971,0.33358,0  
.34934,0.37697,0.37368,0.37155,0.39456,0.13373,0.13693,0.13453,0.13886  
,0.14026,0.14425,0.13415,0.13909,0.14133,0.13758,0.13599,0.13453,0.138  
49,0.13969,0.14126,0.1462,0.13899,0.12823,0.78174,0.82755,0.88055,0.83  
111,0.75332,0.7295,0.45833,0.46749,0.46087,0.47442,0.45199,0.40371,0.3  
2134,0.37536,0.37951,0.36925,0.38195,0.35282,0.32145,0.38369,0.13936,0  
.1362,0.13124,0.14122,0.14071,0.13397,0.13735,0.13556,0.13734,0.13119,  
0.14321,0.13791,0.14494,0.13753,0.13293,0.13525,0.1418,0.14242,0.90347  
,0.82421,0.80319,0.82729,0.91722,0.49427,0.45333,0.52592,0.58606,0.490  
03,0.49552,0.37152,0.27908,0.38848,0.35542,0.33084,0.3358,0.35641,0.39  
717,0.4254,0.13698,0.14103,0.1359,0.14482,0.14161,0.14257,0.14134,0.13  
683,0.13379,0.13612,0.13702,0.14496,0.13088,0.13569,0.13734,0.13663,0.  
13322,0.1369,0.75375,0.85216,0.85908,0.5044,0.44281,0.42144,0.55561,0.  
4646,0.44182,0.53005,0.50293,0.36887,0.2918,0.42059,0.34638,0.32618,0.

40209,0.40652,0.41431,0.41653,0.12937,0.13972,0.13539,0.14056,0.1366,0  
.14005,0.13855,0.14382,0.13654,0.13806,0.13434,0.14162,0.14451,0.13179  
,0.13026,0.13993,0.13729,0.13998,0.853,0.59849,0.47552,0.46058,0.48431  
,0.5579,0.44165,0.46954,0.46549,0.50392,0.36677,0.35722,0.48471,0.3491  
9,0.33207,0.38349,0.35261,0.39585,0.36883,0.14124,0.13949,0.13334,0.14  
347,0.14072,0.14408,0.13672,0.13897,0.14182,0.14209,0.14346,0.13562,0.  
13772,0.14336,0.14033,0.13988,0.13481,0.11012,0.47067,0.46279,0.46891,  
0.54002,0.52632,0.48705,0.41648,0.3917,0.46633,0.45195,0.39217,0.3671,  
0.37826,0.37878,0.40247,0.31101,0.38737,0.3649,0.36905,0.14459,0.13929  
,0.13595,0.14177,0.13926,0.14261,0.1344,0.13182,0.1382,0.13785,0.14153  
,0.1386,0.13532,0.14313,0.13355,0.13761,0.13548,0.11623,0.4928,0.45196  
,0.48782,0.37731,0.47338,0.44737,0.44203,0.49847,0.49989,0.46343,0.393  
51,0.35524,0.36889,0.29192,0.28322,0.47866,0.32224,0.336,0.1272,0.1382  
9,0.13791,0.13697,0.13604,0.13522,0.13853,0.13764,0.14078,0.136,0.1421  
,0.13952,0.13382,0.13385,0.14537,0.1374,0.13355,0.13325,0.11331,0.5670  
3,0.49859,0.50757,0.47841,0.55254,0.50713,0.47607,0.36866,0.44205,0.48  
494,0.42453,0.30668,0.34444,0.33322,0.37569,0.4423,0.39842,0.34183,0.1  
432,0.13291,0.1434,0.12867,0.13447,0.13944,0.14231,0.1403,0.14621,0.13  
216,0.14049,0.13727,0.13713,0.13563,0.13158,0.1394,0.14789,0.11768,0.1  
137,0.11722,0.39593,0.52572,0.46081,0.46819,0.47867,0.24164,0.4121,0.4  
9807,0.47819,0.34944,0.32935,0.31113,0.39704,0.38859,0.34053,0.1301,0.  
13587,0.13396,0.13339,0.13943,0.13807,0.13819,0.13499,0.13507,0.13288,  
0.13115,0.14747,0.14084,0.13889,0.13666,0.14114,0.13362,0.13457,0.1126  
1,0.11421,0.1128,0.1142,0.54641,0.49182,0.49357,0.53336,0.4924,0.50516  
,0.51108,0.49873,0.51918,0.3741,0.36264,0.4029,0.14488,0.14118,0.14882  
,0.13532,0.13924,0.14608,0.13194,0.13389,0.13381,0.14319,0.14552,0.142  
02,0.13626,0.13121,0.14254,0.13521,0.13395,0.13972,0.13689,0.13254,0.1  
1333,0.11553,0.11318,0.10879,0.11333,0.11791,0.42332,0.45119,0.38893,0  
.51146,0.46926,0.46047,0.5202,0.52547,0.14022,0.13943,0.14299,0.13961,  
0.14377,0.14124,0.13446,0.14299,0.14357,0.13796,0.14144,0.1314,0.14066  
,0.1328,0.13646,0.1349,0.14402,0.14027,0.13738,0.13486,0.1387,0.13827,  
0.12891,0.11479,0.12081,0.11416,0.1158,0.11268,0.1121,0.44443,0.47416,  
0.52351,0.45099,0.48368,0.11726,0.11349,0.1416,0.13619,0.13291,0.14446  
,0.12804,0.13945,0.13272,0.13513,0.13995,0.14281,0.13597,0.13972,0.139  
04,0.13291,0.13375,0.13699,0.14293,0.14791,0.14244,0.13743,0.12984,0.1  
1487,0.11411,0.11271,0.11215,0.1111,0.11141,0.10855,0.1143,0.1124,0.11  
376,0.37461,0.47384,0.11332,0.1158,0.11323,0.11317,0.13964,0.13557,0.1  
3672,0.13333,0.14842,0.14181,0.14167,0.13884,0.13956,0.13769,0.13744,0  
.13995,0.13712,0.13721,0.12854,0.13326,0.13876,0.13684,0.1421,0.11278,  
0.11362,0.1132,0.11746,0.11975,0.11029,0.11694,0.11059,0.11152,0.11748  
,0.11378,0.11241,0.11762,0.11349,0.11351,0.11418,0.11847,0.14179,0.143  
62,0.13214,0.1415,0.13564,0.13729,0.13329,0.14107,0.13412,0.13283,0.14  
415,0.13233,0.13864,0.13897,0.13703,0.14162,0.11545,0.12205,0.11541,0.  
11042,0.10869,0.11323,0.11389,0.11326,0.11626,0.11615,0.11104,0.11387,  
0.11561,0.10844,0.1168,0.11147,0.1135,0.11096,0.11763,0.14244,0.13437,  
0.13568,0.13983,0.13339,0.13297,0.14348,0.13116,0.1538,0.13792,0.13192  
,0.13975,0.14031,0.11564,0.11158,0.11284,0.11476,0.11236,0.11434,0.113  
01,0.11497,0.11639,0.11877,0.11434,0.11296,0.11878,0.1173,0.11488,0.11  
664,0.1123,0.11883,0.11584,0.11198,0.11485,0.13895,0.139,0.13762,0.138  
94,0.14358,0.14066,0.14299,0.13873,0.14306,0.11152,0.11432,0.11471,0.1  
1735,0.1116,0.11114,0.11658,0.11693,0.11743,0.1142,0.11296,0.11092,0.1  
1235,0.11384,0.11551,0.11354,0.1186,0.11532,0.11639,0.11584,0.11497,0.

11352,0.11513,0.11234,0.11795,0.13623,0.1366,0.13603,0.13704,0.11698,0.  
.11021,0.10802,0.11366,0.11387,0.11041,0.11427,0.11431,0.11186,0.11157  
,0.11253,0.11534,0.11302,0.1196,0.11438,0.11366,0.11106,0.11633,0.1159  
5,0.11289,0.11487,0.11648,0.111,0.11396,0.11131,0.1129,0.11675,0.11443  
,0.11512,0.11369,0.11497,0.11437,0.11169,0.11609,0.11251,0.11281,0.113  
79,0.11329,0.11486,0.11462,0.11598,0.11467,0.118,0.11019,0.11366,0.111  
79,0.11249,0.11361,0.11342,0.11331,0.11063,0.1165,0.11386,0.1115,0.113  
47,0.11499,0.1105,0.11676,0.10896,0.11569,0.11357,0.11439,0.11474,0.11  
431,0.11686,0.11776,0.11539,0.11289,0.11362,0.10975,0.11679,0.11527,0.  
11923,0.11918,0.11641,0.116,0.11134,0.11273,0.11533,0.11252,0.11331,0.  
11774,0.10954,0.11127,0.1158,0.1167,0.114,0.11821,0.11374,0.11388,0.11  
133,0.11146,0.11328,0.11352,0.11419,0.11827,0.11419,0.11136,0.10923,0.  
11451,0.11429,0.11716,0.11934,0.11316,0.1121,0.11236,0.11709,0.11486,0.  
.11445,0.10972,0.11445,0.11253,0.11246,0.11365,0.11574,0.1107,0.11545,  
0.10953,0.11201,0.11512,0.11963,0.11353,0.11206,0.11648,0.11279,0.1117  
8,0.11411,0.11794,0.11031,0.11203,0.1163,0.1177,0.11623,0.11314,0.1144  
,0.11522,0.11812,0.1098,0.11745,0.12075,0.11421,0.10569,0.11505,0.1135  
8,0.11145,0.11579,0.11489,0.11203,0.10837,0.11308,0.11383,0.112,0.1119  
3,0.11524,0.11516,0.10782,0.11248,0.11083,0.11148,0.11646,0.1153,0.112  
55,0.11789,0.1139,0.11702,0.113,0.11441,0.10694,0.11609,0.11132,0.1130  
1,0.11008,0.11294,0.10999,0.11594,0.11651,0.11597,0.11873,0.11235,0.11  
487,0.11066,0.12056,0.11391,0.11829,0.11627,0.10786,0.11223,0.1101,0.1  
1317,0.1126,0.11939,0.11453,0.11299,0.11048,0.11179  
0.17264,0.15626,0.16955,0.17463,0.16751,0.16976,0.16685,0.16613,0.1777  
5,0.18187,0.1713,0.18169,0.17026,0.16757,0.16996,0.16907,0.17418,0.168  
34,0.1703,0.16847,0.38812,0.45684,0.42161,0.394,0.17421,0.18002,0.1789  
8,0.17611,0.16595,0.1632,0.16602,0.17082,0.18043,0.17784,0.17754,0.167  
85,0.16977,0.1742,0.17555,0.7258,0.39305,0.36934,0.40405,0.41613,0.424  
31,0.41016,0.17448,0.17195,0.16913,0.16695,0.17303,0.18032,0.1747,0.17  
115,0.16295,0.17697,0.16672,0.17574,0.17892,0.17894,0.16998,0.73979,0.  
55544,0.40342,0.47811,0.42642,0.44473,0.44795,0.45843,0.33479,0.48945,  
0.17841,0.16474,0.17319,0.18102,0.17598,0.17823,0.16761,0.17513,0.1700  
9,0.17174,0.1732,0.17633,0.17182,0.1721,0.17723,0.65489,0.67573,0.6401  
4,0.3662,0.44917,0.36622,0.38646,0.37873,0.36581,0.34316,0.4465,0.4861  
3,0.17596,0.17227,0.17543,0.16557,0.16448,0.16948,0.17106,0.17848,0.16  
61,0.16964,0.17026,0.17913,0.1692,0.17676,0.18392,0.17557,0.68813,0.63  
151,0.66364,0.62112,0.43762,0.36204,0.40199,0.42744,0.41822,0.35904,0.  
38676,0.38669,0.41193,0.39166,0.17,0.17497,0.17472,0.17589,0.17424,0.1  
6905,0.16317,0.16545,0.17369,0.17496,0.18123,0.18049,0.17131,0.17324,0.  
.17226,0.16597,0.69848,0.60938,0.68423,0.63161,0.6183,0.65031,0.47481,  
0.39477,0.40216,0.45094,0.36635,0.43034,0.42993,0.35358,0.403,0.43,0.1  
7031,0.17769,0.17605,0.16675,0.17941,0.15528,0.17064,0.16891,0.17848,0.  
.18323,0.1677,0.17072,0.18126,0.17602,0.17042,0.16409,0.17099,0.68944,  
0.6483,0.59481,0.65094,0.65694,0.66047,0.3246,0.39616,0.3431,0.4286,0.  
42814,0.40315,0.4227,0.40758,0.40918,0.43012,0.39329,0.16645,0.17888,0.  
.1699,0.17726,0.17417,0.17746,0.16008,0.16234,0.17243,0.16865,0.17759,  
0.17411,0.17241,0.1425,0.15158,0.14,0.16219,0.61824,0.66798,0.64544,0.  
64769,0.55705,0.67741,0.63702,0.45351,0.44371,0.4166,0.44555,0.4324,0.  
45828,0.45554,0.4136,0.475,0.43046,0.42474,0.17366,0.17603,0.17234,0.1  
72,0.17755,0.16807,0.18402,0.17123,0.17493,0.17503,0.17455,0.13932,0.1  
3367,0.14422,0.14388,0.13829,0.14001,0.1756,0.57092,0.75424,0.68855,0.  
51887,0.61562,0.75258,0.63524,0.40229,0.49852,0.48566,0.43777,0.43894,

0.40101,0.39134,0.41408,0.41717,0.39218,0.42782,0.16602,0.17996,0.1662  
6,0.16892,0.16587,0.17153,0.183,0.17031,0.18116,0.14553,0.13286,0.1445  
4,0.14576,0.1414,0.1377,0.14182,0.13935,0.1384,0.17611,0.57708,0.65567  
,0.63075,0.6725,0.56943,0.61873,0.63968,0.38049,0.36814,0.46242,0.3810  
1,0.43943,0.42586,0.41986,0.52141,0.46104,0.42152,0.40229,0.41826,0.17  
807,0.18123,0.16953,0.16381,0.17205,0.17473,0.1339,0.14747,0.15038,0.1  
3801,0.14056,0.13895,0.13657,0.12654,0.13196,0.13658,0.1419,0.15095,0.  
70076,0.59669,0.68936,0.71198,0.57821,0.60771,0.64431,0.30521,0.38136,  
0.4025,0.4186,0.48211,0.35759,0.41226,0.38003,0.37378,0.42343,0.41635,  
0.3905,0.17631,0.17753,0.17115,0.14671,0.14484,0.14005,0.14015,0.14109  
,0.13722,0.1452,0.14964,0.14069,0.13991,0.14019,0.14553,0.14351,0.1444  
1,0.13864,0.71763,0.56818,0.67441,0.56862,0.58389,0.68954,0.63667,0.67  
875,0.61703,0.39621,0.42442,0.35631,0.36703,0.42055,0.42315,0.41743,0.  
37679,0.45587,0.43517,0.40885,0.14011,0.13884,0.13968,0.1419,0.14178,0.  
.14281,0.14271,0.14477,0.1476,0.14453,0.13682,0.15691,0.13252,0.13281,  
0.13619,0.14281,0.138,0.13661,0.70632,0.712,0.6839,0.73616,0.68749,0.6  
6903,0.66778,0.64952,0.62703,0.40204,0.31817,0.37455,0.29688,0.3165,0.  
33822,0.30746,0.3321,0.28095,0.36451,0.2873,0.14118,0.14355,0.14108,0.  
14311,0.14433,0.14287,0.14036,0.142,0.13605,0.13718,0.14708,0.13678,0.  
14219,0.14055,0.14077,0.14792,0.14199,0.14267,0.68532,0.57149,0.7091,0  
.54986,0.78904,0.57022,0.62888,0.62681,0.59283,0.36139,0.31737,0.31609  
,0.33033,0.33001,0.28613,0.33441,0.30562,0.33336,0.31237,0.35322,0.138  
19,0.1479,0.14878,0.1383,0.14321,0.13768,0.14462,0.14398,0.1429,0.1357  
5,0.15156,0.13486,0.14253,0.13329,0.13837,0.14578,0.13908,0.13553,0.68  
296,0.65474,0.6381,0.62888,0.71189,0.61798,0.6339,0.34417,0.36736,0.38  
307,0.32866,0.33232,0.30481,0.33687,0.28672,0.30481,0.33353,0.30066,0.  
31343,0.3123,0.13393,0.14297,0.13628,0.14519,0.14381,0.14975,0.13636,0.  
.14509,0.14434,0.1404,0.13945,0.13819,0.14438,0.1398,0.1438,0.15098,0.  
14181,0.13177,0.61321,0.6364,0.66573,0.63197,0.58675,0.5216,0.36055,0.  
38909,0.37188,0.38744,0.37738,0.34548,0.2889,0.31235,0.30726,0.31655,0.  
.32062,0.2952,0.26894,0.3203,0.14358,0.14012,0.13133,0.14536,0.14632,0  
.13798,0.14054,0.13693,0.13959,0.13272,0.15041,0.13894,0.14943,0.14341  
,0.13809,0.13528,0.14538,0.14451,0.71661,0.64708,0.59941,0.6937,0.7503  
2,0.41809,0.37534,0.41489,0.50587,0.35962,0.38004,0.31037,0.24491,0.33  
533,0.31087,0.28165,0.27499,0.3066,0.33778,0.33229,0.14096,0.14126,0.1  
3894,0.14819,0.14472,0.14412,0.14706,0.13989,0.13634,0.13782,0.14311,0  
.15024,0.13238,0.13857,0.13968,0.13824,0.13769,0.14094,0.54842,0.67024  
,0.70034,0.39025,0.3704,0.34427,0.46519,0.34776,0.34571,0.41495,0.4147  
7,0.31217,0.25922,0.33677,0.29643,0.27642,0.32139,0.33142,0.3559,0.362  
64,0.13189,0.14193,0.13709,0.14501,0.14031,0.14148,0.13917,0.14644,0.1  
4016,0.13946,0.13497,0.14286,0.14715,0.13423,0.13367,0.14571,0.14241,0  
.14235,0.76416,0.49808,0.38268,0.37319,0.41678,0.45811,0.36037,0.37332  
,0.36623,0.42946,0.29288,0.30199,0.41285,0.29688,0.2769,0.31209,0.3042  
5,0.33577,0.31782,0.14598,0.14684,0.14044,0.14384,0.14378,0.14887,0.13  
753,0.14228,0.14456,0.1433,0.15116,0.13899,0.14348,0.1456,0.13974,0.14  
308,0.14064,0.10534,0.35793,0.35304,0.3737,0.4311,0.43643,0.40105,0.33  
844,0.32722,0.3623,0.3617,0.30567,0.32148,0.32018,0.31775,0.33949,0.27  
693,0.32469,0.31088,0.30072,0.14735,0.1425,0.13887,0.14635,0.14014,0.1  
4675,0.13819,0.13698,0.14134,0.14025,0.1449,0.14321,0.13771,0.1471,0.1  
3847,0.13969,0.13695,0.11077,0.41687,0.36252,0.4024,0.29691,0.37646,0.  
35921,0.35629,0.41963,0.40203,0.36573,0.32976,0.30533,0.30868,0.26594,  
0.24774,0.3909,0.27009,0.29282,0.13277,0.14004,0.13997,0.13972,0.13381

,0.13847,0.14078,0.1386,0.1409,0.14364,0.14993,0.1415,0.13562,0.13694,  
0.14629,0.14164,0.13656,0.13706,0.10582,0.47185,0.41653,0.4125,0.37831  
,0.47656,0.39946,0.39318,0.29714,0.35693,0.38648,0.35354,0.25544,0.285  
32,0.29493,0.33148,0.36328,0.33603,0.28822,0.14694,0.13482,0.14697,0.1  
2931,0.13829,0.13986,0.14353,0.14472,0.15321,0.13362,0.14212,0.13923,0  
.13961,0.13715,0.13446,0.14505,0.15046,0.111,0.10746,0.11044,0.3273,0.  
42691,0.37049,0.37487,0.3953,0.20879,0.34716,0.4003,0.38442,0.29175,0.  
2755,0.26585,0.33619,0.32372,0.29095,0.12971,0.13634,0.13787,0.13925,0  
.14235,0.14089,0.14173,0.1338,0.14125,0.13426,0.13447,0.15248,0.14512,  
0.14359,0.13726,0.14435,0.13592,0.13843,0.10553,0.10785,0.1076,0.10829  
,0.43576,0.38934,0.42674,0.41691,0.38064,0.40034,0.41698,0.40639,0.424  
74,0.32758,0.29346,0.3411,0.14582,0.14308,0.16057,0.14338,0.14143,0.14  
923,0.13243,0.13686,0.13723,0.14403,0.14988,0.14684,0.14058,0.13415,0.  
14637,0.14044,0.13324,0.1446,0.13913,0.13307,0.10964,0.10867,0.10483,0  
.1041,0.10988,0.11082,0.34981,0.36318,0.31076,0.40556,0.3723,0.3683,0.  
42062,0.42237,0.14421,0.14493,0.14763,0.14366,0.14757,0.14413,0.13798,  
0.14541,0.14741,0.13931,0.14416,0.13304,0.14695,0.13222,0.13893,0.1372  
5,0.15055,0.14495,0.141,0.14011,0.14276,0.14383,0.12957,0.11008,0.1134  
2,0.11,0.10952,0.10836,0.10531,0.35074,0.39567,0.44138,0.36583,0.37659  
,0.11027,0.10954,0.14528,0.13791,0.13488,0.14987,0.13299,0.14265,0.134  
02,0.13571,0.14406,0.14624,0.13863,0.14436,0.14169,0.13643,0.13706,0.1  
402,0.14548,0.15219,0.1446,0.14237,0.13048,0.10975,0.10798,0.10592,0.1  
0785,0.10653,0.10538,0.1034,0.10675,0.10803,0.10834,0.31443,0.38111,0.  
10881,0.11022,0.1071,0.10547,0.14601,0.13693,0.13896,0.13921,0.15124,0  
.14746,0.14561,0.14378,0.14371,0.13855,0.13799,0.14456,0.13931,0.14263  
,0.13156,0.13404,0.14647,0.13961,0.14555,0.10859,0.10826,0.10774,0.111  
06,0.11351,0.10531,0.11212,0.10342,0.10529,0.11335,0.1084,0.10856,0.11  
254,0.10871,0.10973,0.11033,0.11302,0.1436,0.14807,0.13397,0.14237,0.1  
375,0.14046,0.13755,0.14303,0.13484,0.13414,0.14871,0.13469,0.14259,0.  
13986,0.14102,0.1443,0.10945,0.11421,0.10933,0.10439,0.10361,0.10728,0  
.10963,0.10889,0.11188,0.11096,0.10664,0.10929,0.10695,0.10465,0.10995  
,0.1055,0.10797,0.10681,0.11279,0.14625,0.13658,0.13789,0.14373,0.1347  
2,0.13446,0.15238,0.13193,0.15716,0.14088,0.13297,0.14219,0.14339,0.10  
939,0.10578,0.107,0.10876,0.10678,0.1099,0.10819,0.10923,0.11135,0.111  
81,0.10856,0.10783,0.11366,0.11274,0.10977,0.1115,0.1067,0.1125,0.1099  
3,0.10626,0.10675,0.14163,0.1426,0.1407,0.14324,0.14838,0.14329,0.1447  
5,0.14433,0.14836,0.10453,0.11138,0.10783,0.11146,0.10734,0.10621,0.11  
024,0.11332,0.10975,0.10769,0.10643,0.10673,0.10777,0.10831,0.10785,0.  
10911,0.11236,0.11148,0.10833,0.10863,0.11003,0.10646,0.11083,0.10558,  
0.11324,0.13819,0.14056,0.13872,0.14093,0.11256,0.10561,0.10085,0.1092  
3,0.10797,0.10256,0.11158,0.10845,0.10811,0.10572,0.10623,0.10914,0.10  
621,0.11155,0.10797,0.10689,0.10551,0.11145,0.1116,0.10734,0.1103,0.11  
161,0.10705,0.10665,0.10423,0.10783,0.111,0.11013,0.10793,0.10334,0.10  
926,0.10911,0.10562,0.10962,0.10591,0.1062,0.10863,0.10719,0.10765,0.1  
0776,0.11068,0.10994,0.11179,0.1037,0.11033,0.10682,0.10657,0.10951,0.  
10856,0.1072,0.10324,0.1074,0.10838,0.10725,0.10735,0.10803,0.10627,0.  
10985,0.10224,0.11063,0.10708,0.10672,0.10743,0.10838,0.11148,0.11214,  
0.10963,0.10662,0.10858,0.10431,0.10949,0.11151,0.11094,0.11417,0.1094  
1,0.11009,0.10768,0.10735,0.10811,0.10804,0.1072,0.10961,0.10212,0.104  
7,0.11048,0.10847,0.10966,0.11302,0.10862,0.10784,0.10343,0.1061,0.107  
5,0.11094,0.1085,0.11267,0.10884,0.10648,0.10353,0.10963,0.10741,0.112  
85,0.11052,0.10919,0.108,0.10754,0.11211,0.10982,0.10968,0.10677,0.108



41,0.10741,0.10659,0.10739,0.10883,0.10537,0.10826,0.10496,0.10743,0.10931,0.11251,0.10661,0.10714,0.10979,0.10773,0.10693,0.10729,0.11172,0.10419,0.10744,0.11213,0.11188,0.11224,0.10858,0.10578,0.10859,0.11136,0.10585,0.11112,0.11334,0.10802,0.10132,0.10819,0.1068,0.10633,0.1094,0.1092,0.10521,0.10372,0.10788,0.10662,0.10476,0.107,0.11,0.10921,0.10274,0.10572,0.1051,0.10754,0.11033,0.10958,0.10804,0.11464,0.10875,0.11049,0.1059,0.10905,0.10328,0.11144,0.1049,0.10693,0.10521,0.10973,0.10501,0.10811,0.10886,0.10965,0.11244,0.10627,0.10898,0.10458,0.11482,0.10794,0.10998,0.11177,0.10126,0.10708,0.10329,0.10858,0.10733,0.11316,0.11075,0.10785,0.10419,0.1043  
0.18049,0.16146,0.1784,0.17853,0.17145,0.17532,0.1757,0.17501,0.18559,0.19366,0.17909,0.18703,0.1794,0.17501,0.17843,0.18182,0.18362,0.17485,0.1762,0.17388,0.3196,0.41424,0.37508,0.35054,0.18253,0.1854,0.18733,0.1901,0.17313,0.17048,0.175,0.17902,0.1896,0.18792,0.18413,0.17966,0.17536,0.18261,0.18356,0.66648,0.35809,0.3335,0.35462,0.36339,0.38536,0.34776,0.18119,0.17877,0.18126,0.17045,0.17813,0.18687,0.1818,0.18112,0.17163,0.18166,0.1753,0.18687,0.18279,0.18644,0.17794,0.6085,0.45808,0.37069,0.42807,0.38951,0.38117,0.37181,0.40478,0.30898,0.41833,0.18992,0.17104,0.18119,0.18552,0.1838,0.18657,0.17572,0.18193,0.17677,0.1784,0.17984,0.18442,0.17863,0.18489,0.18174,0.54987,0.54287,0.53837,0.30834,0.40024,0.32429,0.36293,0.32459,0.3147,0.31504,0.42425,0.42557,0.18293,0.17729,0.18075,0.17531,0.1735,0.17339,0.17703,0.18734,0.17669,0.17827,0.17682,0.18966,0.1775,0.18218,0.18691,0.1797,0.61081,0.51486,0.54856,0.48377,0.37881,0.31466,0.36848,0.36194,0.38311,0.31401,0.32157,0.35115,0.37504,0.32717,0.17682,0.18297,0.18109,0.18462,0.1797,0.17889,0.17635,0.16969,0.18288,0.18053,0.18821,0.18768,0.18088,0.17993,0.17979,0.17516,0.60161,0.44729,0.61909,0.50444,0.55333,0.52174,0.43405,0.35744,0.3457,0.39625,0.32022,0.38793,0.38518,0.30703,0.35694,0.40723,0.17728,0.18517,0.18509,0.17269,0.18665,0.16642,0.17975,0.17852,0.18859,0.19106,0.17543,0.17804,0.1909,0.18362,0.17685,0.17611,0.17999,0.5912,0.51808,0.52424,0.48289,0.49134,0.52242,0.30839,0.35725,0.30321,0.37619,0.37522,0.37066,0.38061,0.33969,0.34284,0.39407,0.3223,0.1762,0.18798,0.18205,0.18278,0.18358,0.18167,0.16911,0.17474,0.18003,0.17775,0.18396,0.18419,0.17944,0.14032,0.15731,0.13813,0.17243,0.47766,0.54609,0.56074,0.50455,0.50683,0.54463,0.49419,0.37053,0.36886,0.35101,0.38849,0.35741,0.40401,0.4154,0.36655,0.43317,0.38397,0.37219,0.18375,0.18171,0.18221,0.18005,0.18546,0.17856,0.1936,0.18194,0.18306,0.18121,0.17971,0.1404,0.13186,0.14558,0.13952,0.13822,0.14058,0.18117,0.44635,0.61631,0.60915,0.43191,0.48796,0.66665,0.51517,0.37863,0.4289,0.39243,0.37838,0.39034,0.34627,0.32875,0.35948,0.34931,0.34247,0.376,0.17577,0.1878,0.17146,0.17816,0.17342,0.18116,0.18921,0.17969,0.18621,0.14499,0.13191,0.14762,0.14764,0.14142,0.13549,0.14248,0.13912,0.13708,0.18259,0.49934,0.562,0.50091,0.56486,0.42766,0.53375,0.54303,0.35213,0.31664,0.40354,0.33847,0.38254,0.37598,0.35024,0.44793,0.39522,0.37884,0.36348,0.3739,0.18604,0.18545,0.1771,0.17429,0.18023,0.18256,0.13549,0.14733,0.14949,0.13745,0.1402,0.1393,0.13466,0.12644,0.13183,0.13569,0.14202,0.15346,0.60531,0.46956,0.56422,0.57594,0.50647,0.51665,0.50554,0.27479,0.35625,0.35912,0.38123,0.39254,0.30561,0.35471,0.34875,0.32296,0.35642,0.35073,0.34622,0.18187,0.18435,0.1819,0.14692,0.14889,0.13942,0.14315,0.14032,0.13664,0.14396,0.15136,0.14118,0.14246,0.14063,0.14638,0.14173,0.14735,0.13678,0.58264,0.43787,0.55816,0.46079,0.50272,0.55424,0.50225,0.56672,0.49387,0.35756,0.37656,0.31855,0.31587,0.38016,0.36

541,0.38298,0.32651,0.39475,0.387,0.38045,0.14141,0.13827,0.14294,0.14  
004,0.14299,0.14289,0.14297,0.14316,0.14711,0.14399,0.13652,0.15559,0.  
12925,0.1326,0.13744,0.14231,0.13752,0.13818,0.61118,0.59792,0.5468,0.  
61294,0.58527,0.58793,0.54987,0.56481,0.50821,0.34044,0.26099,0.31983,  
0.26261,0.27308,0.30268,0.25964,0.30378,0.253,0.32305,0.24999,0.14048,  
0.14415,0.14013,0.14451,0.1472,0.14324,0.14031,0.13912,0.13721,0.13776  
,0.15112,0.13684,0.13802,0.14066,0.14218,0.15075,0.13873,0.14585,0.572  
65,0.44254,0.58489,0.4482,0.66276,0.41376,0.4793,0.51354,0.46547,0.309  
05,0.26561,0.2803,0.29122,0.29831,0.25906,0.30532,0.26248,0.30546,0.27  
415,0.32001,0.13981,0.14766,0.14947,0.13952,0.14221,0.13945,0.1462,0.1  
4307,0.14056,0.13541,0.15918,0.13412,0.14375,0.12985,0.14164,0.14707,0  
.13715,0.13421,0.5611,0.51831,0.54349,0.50626,0.68312,0.51604,0.5532,0  
.28313,0.32148,0.30763,0.30246,0.28759,0.28169,0.28681,0.24741,0.28357  
,0.27431,0.27106,0.27629,0.27852,0.12927,0.14292,0.13654,0.14299,0.142  
82,0.15208,0.13859,0.14521,0.14149,0.14084,0.14204,0.13815,0.14483,0.1  
4221,0.14254,0.14992,0.14186,0.12981,0.51801,0.49411,0.54904,0.56034,0  
.47006,0.43586,0.31303,0.31155,0.33178,0.3369,0.32727,0.30124,0.25506,  
0.27913,0.26673,0.2776,0.28297,0.25818,0.22794,0.29184,0.14463,0.14085  
,0.12884,0.14485,0.14631,0.14042,0.14191,0.13565,0.14001,0.1343,0.1480  
7,0.13792,0.15321,0.14531,0.13751,0.13553,0.14493,0.14717,0.58388,0.53  
256,0.50184,0.60209,0.63166,0.34813,0.31896,0.36327,0.4374,0.31371,0.3  
0879,0.28179,0.2209,0.31042,0.26941,0.2475,0.24395,0.26501,0.29256,0.2  
8257,0.14219,0.13987,0.14103,0.15061,0.14602,0.14373,0.1473,0.14048,0.  
13678,0.13695,0.14536,0.15189,0.13383,0.13926,0.1402,0.13898,0.14156,0  
.14141,0.47062,0.54591,0.5455,0.34302,0.3334,0.28338,0.40197,0.30411,0  
.28718,0.342,0.33513,0.26943,0.2289,0.30987,0.26864,0.23895,0.27705,0.  
28911,0.30931,0.31779,0.13186,0.14532,0.13686,0.14496,0.13732,0.14361,  
0.13892,0.14551,0.14095,0.14006,0.13401,0.14378,0.14638,0.13371,0.1340  
2,0.1458,0.14162,0.14159,0.63961,0.4135,0.31568,0.29196,0.35786,0.3764  
,0.3181,0.31426,0.30758,0.34978,0.26311,0.26057,0.35781,0.26658,0.2491  
2,0.27784,0.27091,0.2909,0.27516,0.14905,0.14303,0.14038,0.14436,0.144  
22,0.15085,0.13312,0.14352,0.14761,0.1453,0.15575,0.13754,0.1445,0.145  
4,0.13816,0.14318,0.14376,0.099011,0.29874,0.28799,0.31957,0.35685,0.3  
5898,0.32388,0.28238,0.31029,0.28872,0.32633,0.27848,0.2878,0.28747,0.  
28219,0.28829,0.2434,0.29318,0.28561,0.2544,0.14872,0.14287,0.1384,0.1  
4446,0.14294,0.14867,0.1403,0.13841,0.14017,0.13926,0.14338,0.14273,0.  
13696,0.14828,0.14049,0.14036,0.14017,0.10093,0.33906,0.32155,0.34071,  
0.2469,0.33539,0.29939,0.31242,0.35913,0.36492,0.32052,0.29906,0.2648,  
0.28556,0.23965,0.2284,0.3447,0.22767,0.25315,0.13142,0.14019,0.13982,  
0.14028,0.13158,0.14009,0.13999,0.13676,0.14099,0.14403,0.1538,0.14544  
,0.13889,0.13799,0.14754,0.14149,0.13559,0.1386,0.097072,0.4063,0.3710  
2,0.35298,0.31654,0.3985,0.31687,0.33627,0.25351,0.29847,0.32793,0.293  
76,0.22245,0.24899,0.27272,0.30535,0.32934,0.30552,0.24597,0.14676,0.1  
3076,0.14653,0.1313,0.13605,0.13804,0.13948,0.14488,0.15553,0.13458,0.  
1413,0.13962,0.13878,0.13874,0.13643,0.14678,0.15125,0.10483,0.10032,0  
.10285,0.27289,0.36611,0.28525,0.32434,0.34035,0.17658,0.29657,0.32344  
,0.32157,0.24396,0.24655,0.24569,0.29048,0.28417,0.25805,0.12721,0.136  
05,0.13733,0.13681,0.14594,0.13911,0.14474,0.13168,0.14209,0.13284,0.1  
3305,0.15345,0.14518,0.14104,0.13573,0.14292,0.13552,0.14229,0.09783,0  
.097831,0.10176,0.09963,0.37117,0.33528,0.3885,0.32591,0.31763,0.32524  
,0.34692,0.34514,0.37112,0.28004,0.24709,0.30088,0.14241,0.13963,0.166  
7,0.14316,0.14285,0.14872,0.1318,0.13877,0.13686,0.14197,0.15164,0.149

19,0.14081,0.1337,0.15142,0.13945,0.135,0.1472,0.14008,0.13354,0.10127  
,0.0997,0.097672,0.094333,0.10416,0.10314,0.30575,0.30732,0.24494,0.35  
472,0.3225,0.31693,0.37399,0.34969,0.14629,0.14442,0.14493,0.14429,0.1  
4938,0.14633,0.14107,0.14471,0.14693,0.13697,0.14555,0.13037,0.14934,0  
.13243,0.14061,0.13685,0.15354,0.14462,0.13884,0.13936,0.14269,0.14512  
,0.12579,0.1013,0.10561,0.10307,0.10107,0.1015,0.09709,0.29952,0.34359  
,0.41331,0.28547,0.33218,0.10265,0.10171,0.14553,0.13482,0.13474,0.150  
08,0.13405,0.14392,0.13059,0.13505,0.14546,0.14503,0.13917,0.14423,0.1  
4262,0.13523,0.13628,0.13843,0.14776,0.15157,0.14489,0.14234,0.12954,0  
.10052,0.098837,0.098188,0.097915,0.098281,0.097335,0.09613,0.1007,0.1  
003,0.099556,0.27181,0.30331,0.10195,0.10045,0.10139,0.095717,0.1476,0  
.13469,0.13881,0.14055,0.15476,0.1484,0.15216,0.14529,0.14086,0.13896,  
0.13637,0.14493,0.14027,0.14161,0.13167,0.12937,0.14736,0.1405,0.14202  
,0.099642,0.10011,0.099825,0.10299,0.10238,0.098374,0.10352,0.096577,0  
.096416,0.10655,0.1004,0.10329,0.10481,0.10334,0.10293,0.10116,0.10422  
,0.1485,0.14721,0.13285,0.14608,0.13687,0.14235,0.13816,0.14146,0.1340  
8,0.13181,0.14664,0.1353,0.14175,0.14097,0.14273,0.14113,0.10047,0.105  
74,0.10262,0.09591,0.099223,0.10009,0.10196,0.10051,0.10414,0.10365,0.  
09725,0.10276,0.099324,0.097186,0.1013,0.097865,0.10025,0.10056,0.1056  
2,0.1496,0.13502,0.13756,0.14143,0.13545,0.13173,0.15378,0.13271,0.161  
66,0.14059,0.13307,0.14108,0.14353,0.10008,0.098006,0.097334,0.10171,0  
.098725,0.10443,0.099138,0.10254,0.1037,0.10266,0.10112,0.10017,0.1052  
1,0.10425,0.10189,0.10176,0.098551,0.10522,0.10226,0.099654,0.099957,0  
.14005,0.14224,0.13875,0.14311,0.14839,0.14282,0.14453,0.14626,0.14928  
,0.096205,0.10463,0.10109,0.10212,0.10043,0.097629,0.10318,0.10558,0.1  
0261,0.10096,0.098918,0.099113,0.098779,0.10058,0.10106,0.10067,0.1052  
5,0.10309,0.10025,0.10252,0.10265,0.097797,0.10075,0.098123,0.10447,0.  
13857,0.14007,0.14029,0.13921,0.10381,0.095422,0.091486,0.099753,0.100  
81,0.095622,0.10221,0.10174,0.10136,0.098884,0.099026,0.10142,0.098817  
,0.10156,0.10221,0.097678,0.098916,0.10374,0.10248,0.097943,0.10284,0.  
10353,0.10068,0.099995,0.097719,0.10255,0.10248,0.10193,0.10175,0.0971  
97,0.1017,0.10205,0.098274,0.10355,0.099216,0.098307,0.1014,0.099241,0  
.098835,0.10307,0.10251,0.10107,0.10459,0.094864,0.10099,0.098055,0.09  
8851,0.10187,0.10166,0.098501,0.096261,0.10234,0.10064,0.099804,0.1012  
2,0.10053,0.10043,0.10311,0.096157,0.10151,0.10128,0.097247,0.1007,0.0  
99775,0.1019,0.10614,0.10447,0.10073,0.098629,0.099192,0.10339,0.10071  
,0.1025,0.10556,0.10375,0.10386,0.10056,0.10176,0.10197,0.10252,0.1010  
8,0.1012,0.095009,0.096702,0.10263,0.10098,0.10266,0.10574,0.10139,0.0  
99785,0.096595,0.098608,0.10041,0.10248,0.1006,0.10465,0.10153,0.09956  
6,0.094259,0.10224,0.10096,0.10615,0.10132,0.10161,0.099292,0.09853,0.  
10317,0.10304,0.1048,0.096696,0.10294,0.10145,0.098595,0.10086,0.10163  
,0.097492,0.10133,0.097362,0.10072,0.10279,0.10271,0.099628,0.10044,0.  
10164,0.099715,0.098711,0.099578,0.10439,0.098581,0.10038,0.10431,0.10  
52,0.10599,0.10078,0.098419,0.099743,0.10358,0.097159,0.10444,0.10547,  
0.097612,0.093722,0.10214,0.10017,0.095761,0.1003,0.10086,0.097609,0.0  
94106,0.098806,0.098801,0.097059,0.10095,0.10092,0.10153,0.096006,0.09  
9034,0.097866,0.10237,0.10158,0.10113,0.099839,0.10743,0.10076,0.10111  
,0.10079,0.10152,0.096738,0.10333,0.096406,0.09948,0.096757,0.10162,0.  
096369,0.10046,0.10069,0.10244,0.1049,0.10165,0.10095,0.095725,0.10839  
,0.10219,0.1029,0.10231,0.095566,0.10035,0.097561,0.098936,0.10063,0.1  
0476,0.10379,0.10037,0.097051,0.094263

0.18585,0.16896,0.18252,0.18447,0.18156,0.17997,0.18137,0.17706,0.1938  
5,0.19404,0.18243,0.19081,0.18349,0.17837,0.18236,0.18297,0.18831,0.18  
392,0.18014,0.17871,0.28462,0.37748,0.35206,0.32342,0.18688,0.1875,0.1  
9412,0.19686,0.17778,0.17631,0.17645,0.18694,0.19619,0.19698,0.1913,0.  
18514,0.17949,0.188,0.19377,0.5588,0.32423,0.29361,0.31692,0.35851,0.3  
5923,0.31481,0.18636,0.17963,0.18353,0.17712,0.1859,0.19247,0.18685,0.  
18466,0.17657,0.18885,0.17843,0.19194,0.1893,0.18741,0.18212,0.54355,0  
.37254,0.3572,0.38296,0.36257,0.35736,0.35186,0.35736,0.30796,0.3746,0  
.19859,0.17747,0.18601,0.18827,0.18957,0.19366,0.18216,0.19052,0.18161  
,0.18158,0.18483,0.18948,0.18278,0.18711,0.18632,0.47354,0.45524,0.452  
54,0.2818,0.3665,0.30668,0.3206,0.28501,0.28363,0.30394,0.38202,0.3784  
1,0.18546,0.1836,0.18573,0.18152,0.18159,0.18218,0.18267,0.19122,0.177  
96,0.18629,0.18286,0.18906,0.18502,0.18962,0.19361,0.18484,0.55402,0.4  
3607,0.46542,0.46989,0.33772,0.28637,0.34351,0.33867,0.33881,0.29502,0  
.29641,0.32755,0.34126,0.29646,0.18532,0.18822,0.18465,0.19679,0.1858,  
0.1815,0.18133,0.17453,0.18881,0.18207,0.19069,0.19238,0.19125,0.18233  
,0.18635,0.17909,0.54959,0.39911,0.58996,0.4367,0.49058,0.45282,0.3928  
5,0.29891,0.32453,0.37252,0.30109,0.37445,0.35096,0.2857,0.3136,0.3936  
,0.18242,0.18918,0.18703,0.18082,0.19048,0.17274,0.18682,0.18282,0.191  
94,0.19218,0.18586,0.18604,0.19142,0.18778,0.17743,0.18449,0.18526,0.5  
0278,0.46429,0.51435,0.41255,0.38802,0.45714,0.29179,0.31712,0.28095,0  
.33793,0.32654,0.34369,0.36604,0.30903,0.30636,0.36596,0.30097,0.18072  
,0.1995,0.18885,0.18667,0.185,0.18194,0.18073,0.1832,0.18792,0.17971,0  
.18914,0.18818,0.18715,0.13946,0.16058,0.13656,0.17734,0.39163,0.51156  
,0.47529,0.4455,0.41492,0.50613,0.39901,0.34684,0.3633,0.31603,0.37176  
,0.32827,0.36825,0.35886,0.34233,0.39111,0.35224,0.36163,0.19134,0.185  
87,0.18144,0.18721,0.19416,0.19119,0.19994,0.18809,0.18848,0.18671,0.1  
8191,0.1381,0.13032,0.14322,0.13809,0.13532,0.14115,0.18705,0.38677,0.  
49325,0.50111,0.42006,0.48392,0.58247,0.42828,0.34435,0.40284,0.35561,  
0.3508,0.36778,0.31521,0.29998,0.31738,0.30828,0.32746,0.32741,0.17986  
,0.19635,0.17737,0.18421,0.17884,0.18738,0.19547,0.18676,0.19544,0.142  
73,0.12933,0.14824,0.14697,0.13887,0.13497,0.1403,0.13587,0.1373,0.185  
76,0.43227,0.46573,0.41794,0.49224,0.3615,0.47101,0.42273,0.32036,0.29  
192,0.36173,0.30554,0.33874,0.33586,0.32412,0.41027,0.36448,0.3252,0.3  
1272,0.33776,0.19124,0.19448,0.18889,0.17641,0.18909,0.19468,0.13428,0  
.14439,0.14845,0.13671,0.13891,0.14159,0.13437,0.12502,0.13042,0.13456  
,0.14063,0.15577,0.54132,0.38973,0.51186,0.48182,0.40738,0.48797,0.457  
32,0.25719,0.33982,0.32594,0.35075,0.3677,0.29391,0.3201,0.32894,0.289  
93,0.3471,0.31032,0.34145,0.19035,0.19038,0.18389,0.14532,0.14863,0.14  
103,0.1422,0.13468,0.13252,0.14295,0.15224,0.13997,0.14275,0.13791,0.1  
4329,0.14021,0.14923,0.13532,0.46795,0.40777,0.5115,0.4562,0.4294,0.50  
062,0.46579,0.52043,0.41798,0.32445,0.35098,0.31297,0.29467,0.35438,0.  
33128,0.34477,0.28307,0.35347,0.33403,0.34429,0.14197,0.13654,0.14302,  
0.13814,0.14078,0.14022,0.1441,0.1434,0.15006,0.14483,0.1374,0.15495,0  
.12564,0.13058,0.13996,0.14256,0.13253,0.13823,0.54273,0.53581,0.49173  
,0.53495,0.48614,0.51598,0.4934,0.5108,0.40761,0.30029,0.23237,0.28289  
,0.22975,0.23849,0.28355,0.23414,0.27971,0.23862,0.28064,0.22461,0.137  
59,0.14505,0.13874,0.14346,0.14463,0.14287,0.13777,0.13653,0.13314,0.1  
365,0.15151,0.13677,0.13684,0.13859,0.14179,0.15167,0.13899,0.14524,0.  
54796,0.38148,0.5036,0.38472,0.58305,0.35349,0.40879,0.43656,0.38627,0  
.29061,0.22291,0.25007,0.27645,0.2619,0.23229,0.28518,0.24618,0.27755,  
0.25202,0.28571,0.13672,0.14911,0.14966,0.13605,0.14252,0.14161,0.1427

9,0.13956,0.13783,0.13256,0.15887,0.13177,0.14059,0.12749,0.13986,0.14  
739,0.13727,0.13426,0.48481,0.44611,0.48627,0.3958,0.60444,0.47226,0.4  
4487,0.25202,0.27829,0.25696,0.26512,0.27295,0.25468,0.27017,0.22295,0  
.25628,0.25198,0.25312,0.26129,0.25275,0.12543,0.1412,0.1347,0.1414,0.  
14088,0.1504,0.13947,0.14588,0.13942,0.14161,0.13842,0.13964,0.14376,0  
.14305,0.14104,0.14766,0.14047,0.12893,0.41119,0.44836,0.51952,0.48644  
,0.36661,0.41808,0.28859,0.28391,0.29223,0.31096,0.26748,0.27185,0.236  
79,0.25385,0.25316,0.26254,0.26753,0.23584,0.20658,0.27404,0.14539,0.1  
4063,0.12762,0.14533,0.1461,0.13849,0.14305,0.13348,0.13913,0.13416,0.  
14749,0.13483,0.15629,0.14715,0.13623,0.13251,0.14377,0.14613,0.57544,  
0.47615,0.42693,0.51129,0.58261,0.32156,0.27334,0.3082,0.39425,0.28517  
,0.27091,0.256,0.20663,0.27745,0.23495,0.23001,0.21372,0.25027,0.25921  
,0.2538,0.13954,0.14038,0.14195,0.1534,0.14524,0.13895,0.1489,0.13987,  
0.13686,0.13709,0.14554,0.15233,0.13172,0.13925,0.13826,0.1363,0.14096  
,0.13979,0.43349,0.4712,0.45301,0.30389,0.28443,0.2618,0.35842,0.24725  
,0.26415,0.31105,0.293,0.22846,0.20367,0.286,0.24483,0.22437,0.24945,0  
.2545,0.29738,0.29158,0.12905,0.14506,0.13749,0.14439,0.13417,0.14321,  
0.13894,0.14615,0.14037,0.13757,0.13288,0.14213,0.14264,0.1312,0.13187  
,0.14463,0.14139,0.13943,0.58364,0.36332,0.29464,0.25469,0.30112,0.356  
27,0.29553,0.29737,0.27481,0.3291,0.24089,0.2508,0.31529,0.25208,0.219  
29,0.26699,0.25255,0.27971,0.25456,0.14698,0.14082,0.14045,0.14274,0.1  
4139,0.15012,0.13342,0.14353,0.14704,0.14463,0.16144,0.13585,0.14204,0  
.14457,0.13756,0.1428,0.14468,0.091055,0.25818,0.25136,0.27803,0.31869  
,0.31156,0.27515,0.25343,0.27424,0.25338,0.30277,0.25005,0.26084,0.274  
14,0.26143,0.25542,0.2118,0.2767,0.24906,0.23385,0.14761,0.14042,0.136  
69,0.14155,0.14298,0.14792,0.14046,0.13754,0.13667,0.13789,0.14547,0.1  
4263,0.13436,0.14718,0.1424,0.13702,0.14035,0.093741,0.29755,0.26165,0  
.29068,0.21321,0.2899,0.2475,0.30384,0.3054,0.3181,0.27196,0.26339,0.2  
246,0.25976,0.22521,0.21221,0.31737,0.21608,0.21552,0.12986,0.13983,0.  
13832,0.13723,0.12718,0.13951,0.13908,0.1335,0.13926,0.14228,0.15258,0  
.14842,0.13934,0.13673,0.14484,0.13632,0.13478,0.13703,0.090767,0.3468  
5,0.33517,0.30998,0.27982,0.3499,0.2672,0.32353,0.21298,0.26045,0.2833  
3,0.26639,0.21572,0.21601,0.25178,0.28776,0.31237,0.29137,0.22129,0.14  
597,0.12889,0.14288,0.13095,0.13477,0.13845,0.13919,0.14408,0.15654,0.  
13419,0.13988,0.13583,0.13821,0.14052,0.13246,0.14476,0.152,0.095987,0  
.091815,0.092648,0.24402,0.33237,0.26899,0.27834,0.2968,0.15249,0.2590  
5,0.28353,0.26911,0.22235,0.23557,0.23175,0.27688,0.25753,0.23102,0.12  
579,0.13776,0.13398,0.13466,0.14408,0.13706,0.1465,0.13003,0.14257,0.1  
3269,0.13049,0.15314,0.14606,0.14161,0.13427,0.14197,0.13581,0.14308,0  
.090893,0.09161,0.09029,0.092644,0.29568,0.30002,0.35421,0.30313,0.281  
26,0.30421,0.29961,0.30468,0.33525,0.24767,0.22255,0.27475,0.13976,0.1  
3802,0.17208,0.1415,0.14473,0.14836,0.13103,0.13698,0.13321,0.13988,0.  
15208,0.1467,0.13953,0.13166,0.1503,0.13743,0.13447,0.1459,0.13731,0.1  
3121,0.093475,0.090233,0.089121,0.087086,0.094938,0.093878,0.26516,0.2  
5161,0.22995,0.30817,0.27152,0.27626,0.3472,0.30189,0.14758,0.14539,0.  
14494,0.14376,0.14545,0.14634,0.14008,0.14282,0.14585,0.13486,0.14294,  
0.12665,0.15358,0.1275,0.13901,0.1377,0.15243,0.14359,0.13872,0.13803,  
0.13927,0.14467,0.12304,0.095488,0.096194,0.095443,0.092361,0.092788,0  
.0913,0.25648,0.30825,0.36465,0.26632,0.31335,0.094692,0.092077,0.1455  
1,0.13477,0.13386,0.15027,0.13099,0.1425,0.12718,0.13299,0.14333,0.142  
71,0.13648,0.14494,0.14184,0.13549,0.13466,0.13728,0.14586,0.1483,0.14  
514,0.13995,0.12483,0.092039,0.090757,0.090514,0.089846,0.090915,0.091

217,0.089974,0.092991,0.09242,0.090539,0.24122,0.28793,0.095279,0.0901  
56,0.096302,0.088286,0.14287,0.13251,0.14076,0.14175,0.14955,0.14781,0  
.14872,0.14258,0.14212,0.13764,0.13302,0.14419,0.13828,0.14086,0.12915  
,0.12603,0.14386,0.14137,0.13907,0.088824,0.091917,0.092791,0.095448,0  
.096053,0.090385,0.094482,0.088001,0.087574,0.097002,0.092208,0.095552  
,0.095838,0.094099,0.094745,0.094636,0.094428,0.15129,0.14814,0.13171,  
0.14485,0.1338,0.14006,0.13735,0.13736,0.13091,0.1309,0.14478,0.13475,  
0.1384,0.14099,0.13959,0.14141,0.093445,0.097632,0.097007,0.089639,0.0  
9218,0.091778,0.095746,0.092084,0.09489,0.094693,0.09035,0.094253,0.09  
2934,0.089646,0.0933,0.090252,0.092932,0.093984,0.098733,0.14807,0.131  
86,0.13583,0.1419,0.13553,0.13075,0.15114,0.13228,0.1621,0.13909,0.131  
34,0.13806,0.13959,0.092527,0.089426,0.089257,0.094446,0.090581,0.0963  
02,0.09144,0.095446,0.094513,0.094392,0.09341,0.092317,0.095931,0.0971  
27,0.093418,0.094878,0.090729,0.098207,0.094669,0.092259,0.092324,0.14  
327,0.14021,0.13846,0.14157,0.14436,0.14167,0.14305,0.14385,0.14617,0.  
08835,0.096083,0.096479,0.094027,0.093808,0.089239,0.095952,0.098519,0  
.094872,0.091645,0.090069,0.092286,0.09151,0.093911,0.093148,0.090799,  
0.096319,0.094701,0.092532,0.093028,0.094596,0.091467,0.092897,0.09074  
6,0.095485,0.13639,0.13823,0.13988,0.13889,0.094337,0.086858,0.086405,  
0.092513,0.092534,0.086909,0.094203,0.092926,0.092413,0.091911,0.09120  
9,0.093377,0.089984,0.092448,0.094502,0.090358,0.093194,0.094265,0.093  
428,0.092023,0.093916,0.094121,0.093246,0.091137,0.091084,0.093373,0.0  
94266,0.092666,0.092883,0.089166,0.094718,0.093161,0.092201,0.095648,0  
.09018,0.091633,0.093544,0.092494,0.089923,0.096156,0.092335,0.093405,  
0.096245,0.087861,0.092562,0.091208,0.089807,0.094643,0.095431,0.09029  
,0.087214,0.094502,0.092672,0.090375,0.093759,0.09482,0.091806,0.09521  
8,0.089695,0.090969,0.092477,0.087943,0.091685,0.092373,0.096696,0.099  
087,0.097235,0.093152,0.091215,0.090136,0.094624,0.092203,0.094784,0.0  
96143,0.096799,0.095638,0.091313,0.094452,0.093242,0.091555,0.093578,0  
.092629,0.089267,0.089496,0.093674,0.092019,0.093921,0.097123,0.093162  
,0.092312,0.089614,0.090319,0.093974,0.093592,0.092419,0.096213,0.0928  
32,0.090845,0.085393,0.094347,0.091908,0.097528,0.094486,0.092591,0.09  
0532,0.088742,0.094651,0.095885,0.096145,0.088643,0.093524,0.092737,0.  
09025,0.095843,0.094849,0.08917,0.093852,0.088687,0.09237,0.093236,0.0  
93388,0.091165,0.0964,0.093692,0.093819,0.091846,0.090242,0.099342,0.0  
90415,0.092746,0.094399,0.095954,0.098309,0.093131,0.091529,0.092166,0  
.095501,0.090118,0.096206,0.09421,0.091362,0.085639,0.095147,0.091407,  
0.088679,0.093208,0.094686,0.088807,0.085503,0.092998,0.091439,0.09090  
4,0.093286,0.094008,0.093179,0.0904,0.091242,0.090705,0.092814,0.09214  
6,0.094259,0.092213,0.097927,0.09298,0.095979,0.092509,0.091368,0.0879  
23,0.094729,0.088685,0.092355,0.088685,0.094126,0.087336,0.090514,0.09  
2404,0.094851,0.096301,0.09426,0.091513,0.086972,0.097201,0.093149,0.0  
93988,0.094585,0.087684,0.090739,0.091445,0.090134,0.090532,0.096781,0  
.093533,0.093265,0.089618,0.088169  
0.19287,0.17507,0.18731,0.19053,0.18426,0.18291,0.18718,0.1835,0.19822  
,0.19665,0.18423,0.19164,0.18607,0.18223,0.18517,0.18826,0.19197,0.186  
33,0.18315,0.18071,0.2822,0.34508,0.33154,0.30396,0.18957,0.19396,0.19  
533,0.20012,0.18661,0.18518,0.18137,0.19265,0.20048,0.19724,0.19248,0.  
18878,0.18286,0.19157,0.19834,0.47002,0.28625,0.28161,0.31721,0.34197,  
0.31773,0.31355,0.19283,0.18707,0.18593,0.1825,0.19042,0.19961,0.1941,  
0.18702,0.1787,0.19228,0.17678,0.19567,0.19459,0.18994,0.18674,0.50459  
,0.38895,0.32073,0.34283,0.34338,0.35272,0.329,0.33176,0.29527,0.35297

,0.2014,0.18573,0.19115,0.18913,0.19344,0.19651,0.18928,0.19306,0.18728,0.18609,0.18644,0.18991,0.18682,0.19178,0.19129,0.42555,0.37921,0.40236,0.26948,0.33009,0.28936,0.30576,0.27361,0.27157,0.29888,0.3456,0.35465,0.1884,0.19053,0.18843,0.18624,0.18564,0.18281,0.18586,0.19511,0.18649,0.19136,0.1873,0.1906,0.18614,0.19063,0.1958,0.1885,0.52987,0.3872,0.44351,0.40037,0.31116,0.27236,0.32132,0.31356,0.31562,0.26569,0.28929,0.31993,0.30676,0.26283,0.18698,0.19341,0.19037,0.20226,0.19241,0.18481,0.18747,0.18214,0.19787,0.18019,0.19477,0.19683,0.19426,0.18485,0.1892,0.1842,0.52122,0.3935,0.53216,0.42725,0.41042,0.43553,0.35088,0.29243,0.30187,0.35712,0.27381,0.33714,0.35217,0.2736,0.29948,0.37003,0.18265,0.19036,0.18881,0.18781,0.19174,0.17501,0.1914,0.18464,0.19582,0.19717,0.18918,0.1915,0.19722,0.19309,0.18246,0.19278,0.18822,0.49727,0.41398,0.48287,0.38645,0.30862,0.42335,0.29424,0.29586,0.24198,0.33248,0.31822,0.30376,0.36052,0.31446,0.30353,0.34626,0.29314,0.18407,0.1981,0.19012,0.18912,0.1905,0.18486,0.18237,0.18551,0.1896,0.18258,0.19855,0.18969,0.19157,0.13911,0.15676,0.13488,0.18266,0.38038,0.47966,0.43212,0.42038,0.34062,0.46966,0.38164,0.32401,0.36038,0.31539,0.34243,0.30945,0.32115,0.31923,0.33547,0.3862,0.33857,0.33738,0.19188,0.19146,0.18227,0.18888,0.19692,0.19496,0.20014,0.19201,0.19345,0.18962,0.18593,0.13384,0.12994,0.14315,0.13517,0.13428,0.14063,0.18675,0.41429,0.47728,0.4485,0.38213,0.45369,0.50193,0.39835,0.33558,0.40411,0.32587,0.31823,0.35916,0.26734,0.28281,0.29155,0.29845,0.31431,0.3129,0.18293,0.20042,0.18679,0.18706,0.17996,0.19315,0.2016,0.19294,0.19965,0.13995,0.1279,0.14953,0.1475,0.13918,0.1352,0.13883,0.13281,0.13643,0.19032,0.39818,0.44695,0.3614,0.46092,0.35557,0.42305,0.41012,0.2948,0.27986,0.34537,0.28596,0.34099,0.32564,0.31053,0.361,0.34632,0.31482,0.27759,0.29703,0.19376,0.19964,0.18777,0.1826,0.19062,0.20145,0.13242,0.14337,0.14502,0.13176,0.13955,0.13938,0.13423,0.12443,0.12973,0.13221,0.13673,0.15469,0.51423,0.35028,0.49153,0.44252,0.38585,0.45331,0.39005,0.25093,0.3151,0.31273,0.32927,0.32513,0.27884,0.32042,0.29667,0.29279,0.32059,0.28733,0.33232,0.19158,0.1976,0.18501,0.14185,0.14748,0.13839,0.14135,0.13345,0.13113,0.14221,0.14985,0.13789,0.13972,0.13659,0.13895,0.13825,0.1493,0.13142,0.45094,0.39145,0.48059,0.44841,0.40092,0.46099,0.44098,0.46759,0.36421,0.31765,0.34115,0.30825,0.27724,0.32023,0.32669,0.31278,0.26508,0.34525,0.32526,0.31306,0.14106,0.13471,0.1416,0.13731,0.13773,0.13777,0.14224,0.14346,0.14907,0.14033,0.13398,0.14934,0.12337,0.12776,0.13982,0.14156,0.12938,0.13558,0.51583,0.46478,0.42635,0.4596,0.44552,0.43744,0.45806,0.46665,0.35009,0.28237,0.23355,0.26194,0.21456,0.21467,0.26975,0.22393,0.26878,0.22902,0.2746,0.19981,0.13474,0.14219,0.13659,0.14286,0.14151,0.1405,0.13577,0.13592,0.13303,0.13579,0.15213,0.13363,0.13499,0.13583,0.14006,0.15076,0.13883,0.14267,0.51978,0.32879,0.47902,0.33024,0.50649,0.32236,0.41378,0.35614,0.3455,0.26216,0.19795,0.24094,0.25032,0.22922,0.22269,0.26244,0.2447,0.26684,0.25471,0.26584,0.13334,0.15138,0.15186,0.13285,0.13862,0.14054,0.14121,0.13791,0.13555,0.13187,0.16449,0.12942,0.13825,0.12488,0.13895,0.14383,0.13578,0.13088,0.45532,0.50851,0.4278,0.32817,0.56876,0.42091,0.3835,0.23446,0.25785,0.23576,0.24397,0.24751,0.24306,0.26339,0.21517,0.23869,0.25214,0.24299,0.22148,0.24241,0.12127,0.13955,0.13265,0.13948,0.1378,0.14812,0.13628,0.14276,0.13795,0.14057,0.13524,0.13848,0.14137,0.1424,0.14076,0.14417,0.1382,0.12576,0.38908,0.42537,0.43262,0.44253,0.34061,0.3462,0.25303,0.25714,0.25765,0.28066,0.23403,0.2676,0.22353,0.23501,0.24769,0.23748,0.24814,0.23468,0.20098,0.24716,0.14481,0.13

85,0.12506,0.14517,0.14118,0.13548,0.14164,0.13288,0.13489,0.1327,0.14  
632,0.13127,0.1525,0.14774,0.13703,0.13084,0.14198,0.14688,0.5288,0.43  
153,0.4172,0.45148,0.54479,0.3065,0.23281,0.28342,0.34163,0.26206,0.24  
891,0.23462,0.19546,0.25108,0.22308,0.22444,0.19295,0.23187,0.24818,0.  
22591,0.13713,0.14111,0.1416,0.15269,0.14638,0.13749,0.14691,0.13809,0  
.13525,0.13607,0.14628,0.15482,0.12744,0.13526,0.13528,0.13425,0.13767  
,0.13826,0.41072,0.40332,0.41642,0.28164,0.26712,0.23613,0.35077,0.244  
4,0.23418,0.28938,0.25879,0.22622,0.19443,0.26463,0.23296,0.20669,0.23  
275,0.23293,0.2879,0.29828,0.1273,0.14008,0.13591,0.14285,0.12755,0.13  
955,0.13751,0.14833,0.13915,0.13508,0.13391,0.13841,0.13906,0.13119,0.  
12715,0.14454,0.14065,0.13919,0.50476,0.32984,0.26133,0.2279,0.27912,0  
.32167,0.27591,0.26182,0.23915,0.31167,0.21366,0.23666,0.30268,0.24158  
,0.22682,0.2471,0.23654,0.23484,0.23703,0.1449,0.13518,0.13808,0.13763  
,0.13785,0.14662,0.13321,0.1427,0.1466,0.14098,0.16398,0.13447,0.1413,  
0.1447,0.13647,0.14226,0.14217,0.083795,0.24168,0.22775,0.2557,0.2959,  
0.28591,0.25921,0.23224,0.27443,0.21614,0.26369,0.23229,0.25138,0.2493  
4,0.25858,0.25629,0.19929,0.25795,0.22326,0.21889,0.14863,0.13761,0.13  
636,0.1386,0.13956,0.14633,0.13953,0.13625,0.13507,0.13516,0.14622,0.1  
4159,0.13516,0.146,0.14007,0.13523,0.1403,0.085182,0.26855,0.23005,0.2  
5928,0.20495,0.28382,0.21796,0.29802,0.27259,0.29684,0.23511,0.25282,0  
.21787,0.24169,0.21166,0.2031,0.307,0.20337,0.20299,0.12851,0.13864,0.  
13601,0.13543,0.12498,0.14275,0.13698,0.13105,0.13594,0.1413,0.15211,0  
.14468,0.13796,0.13347,0.1398,0.1334,0.13457,0.13627,0.081949,0.32624,  
0.29883,0.26341,0.23792,0.3025,0.2421,0.2967,0.18138,0.22612,0.24464,0  
.25352,0.20436,0.20506,0.23334,0.27271,0.31103,0.27536,0.20729,0.1437,  
0.12723,0.14271,0.12816,0.13248,0.13403,0.13606,0.14169,0.15827,0.1336  
8,0.13751,0.13059,0.13704,0.13951,0.12989,0.14213,0.14916,0.087523,0.0  
83636,0.084038,0.22125,0.29516,0.24975,0.28009,0.25799,0.1278,0.23677,  
0.26343,0.25477,0.19273,0.21837,0.22704,0.2882,0.25252,0.22602,0.1233,  
0.13669,0.13486,0.13349,0.14173,0.13675,0.14467,0.12562,0.13822,0.1328  
3,0.12807,0.15171,0.1438,0.14047,0.13243,0.14045,0.13335,0.14288,0.082  
749,0.084692,0.082203,0.087433,0.2764,0.28523,0.32271,0.28163,0.27675,  
0.26523,0.26549,0.29068,0.28971,0.24494,0.20967,0.25383,0.13634,0.1350  
6,0.17347,0.13875,0.1444,0.14635,0.1321,0.13518,0.13104,0.13577,0.1518  
1,0.14294,0.13752,0.12792,0.15093,0.13816,0.13115,0.14074,0.13378,0.12  
916,0.084284,0.081103,0.080835,0.081563,0.086084,0.08418,0.25454,0.240  
7,0.22263,0.30085,0.24973,0.24836,0.30114,0.2821,0.1481,0.13901,0.1423  
7,0.14135,0.14611,0.14486,0.14062,0.13937,0.14299,0.1337,0.14261,0.120  
6,0.15365,0.12335,0.13851,0.13694,0.15275,0.14148,0.14002,0.13537,0.13  
856,0.14376,0.12021,0.086973,0.087892,0.087765,0.086511,0.084279,0.081  
371,0.24376,0.26462,0.33274,0.21992,0.28806,0.086601,0.086644,0.1442,0  
.13265,0.13129,0.14619,0.13102,0.14158,0.12395,0.1297,0.14365,0.13814,  
0.13689,0.14331,0.1397,0.13274,0.13237,0.13503,0.14486,0.14756,0.14276  
,0.13951,0.12184,0.082878,0.082647,0.085026,0.084631,0.083603,0.083361  
,0.080728,0.085713,0.083372,0.08382,0.21836,0.25151,0.088767,0.083405,  
0.087278,0.081012,0.14176,0.13043,0.14099,0.1384,0.15032,0.14793,0.148  
72,0.14123,0.14202,0.13423,0.1312,0.14045,0.13571,0.13759,0.12612,0.11  
932,0.1405,0.13833,0.14255,0.081044,0.084722,0.085907,0.087492,0.08849  
7,0.083201,0.084272,0.081021,0.07938,0.086477,0.08527,0.088549,0.09097  
6,0.085947,0.087115,0.086601,0.088993,0.15033,0.14568,0.12978,0.14093,  
0.13046,0.1362,0.13545,0.13576,0.12652,0.12959,0.14231,0.13324,0.1365,  
0.14173,0.13977,0.14095,0.086445,0.092482,0.091287,0.081905,0.082975,0



.084166,0.087523,0.086702,0.087274,0.088227,0.082935,0.087872,0.086576  
,0.082764,0.086234,0.082943,0.084672,0.087041,0.090621,0.14498,0.13194  
,0.13177,0.14115,0.13272,0.12608,0.15229,0.13141,0.16187,0.13954,0.130  
57,0.1353,0.13892,0.08622,0.081362,0.082436,0.085786,0.082934,0.087713  
,0.083553,0.087108,0.088056,0.088358,0.087743,0.085794,0.089337,0.0882  
5,0.087214,0.086732,0.083704,0.089878,0.087946,0.084179,0.087026,0.140  
78,0.13689,0.13603,0.14084,0.14056,0.14204,0.14046,0.1414,0.14536,0.07  
9118,0.087838,0.088602,0.086697,0.085249,0.082137,0.087271,0.090298,0.  
089005,0.086449,0.084254,0.087161,0.085048,0.083722,0.083677,0.085856,  
0.089097,0.087534,0.081698,0.086346,0.088199,0.083932,0.084667,0.08374  
7,0.088431,0.13397,0.13837,0.14027,0.13665,0.087415,0.078677,0.076752,  
0.084957,0.08508,0.079787,0.08806,0.085486,0.08778,0.084127,0.083196,0.  
.08394,0.08104,0.086431,0.088051,0.0844,0.083907,0.085979,0.085605,0.0  
85897,0.085563,0.084324,0.083977,0.084677,0.084621,0.086713,0.088072,0.  
.08482,0.085146,0.081075,0.086761,0.083891,0.085737,0.088669,0.082165,  
0.084464,0.086644,0.086071,0.082756,0.087233,0.084229,0.087651,0.08682  
2,0.082002,0.085407,0.083005,0.084032,0.08699,0.086445,0.083927,0.0770  
64,0.088898,0.086564,0.082801,0.085404,0.088591,0.083257,0.087852,0.08  
2393,0.084497,0.086754,0.079881,0.086372,0.086436,0.091305,0.089379,0.  
090721,0.086889,0.083705,0.083488,0.087766,0.083361,0.086557,0.087387,  
0.090571,0.088501,0.083681,0.086917,0.08449,0.083532,0.086444,0.084153  
,0.083124,0.083146,0.088726,0.085227,0.086492,0.091495,0.086418,0.0842  
76,0.083589,0.083076,0.083605,0.085992,0.084979,0.086508,0.084691,0.08  
221,0.077943,0.085512,0.082842,0.090489,0.090054,0.085115,0.083117,0.0  
80294,0.086906,0.089918,0.088622,0.081236,0.086405,0.085763,0.08215,0.  
088063,0.087884,0.081773,0.084339,0.082686,0.085073,0.084748,0.084591,  
0.084466,0.089191,0.086925,0.086598,0.082962,0.082454,0.091054,0.08192  
7,0.083854,0.084223,0.086574,0.090977,0.089478,0.085337,0.082396,0.088  
72,0.083473,0.089175,0.087249,0.083326,0.07881,0.088418,0.084811,0.079  
463,0.087211,0.087325,0.080822,0.079632,0.085948,0.084607,0.085353,0.0  
86787,0.086461,0.085572,0.084005,0.084006,0.081888,0.086472,0.085031,0.  
.086045,0.082762,0.089266,0.085216,0.086189,0.084535,0.086221,0.082031  
,0.08856,0.081785,0.08332,0.082943,0.087602,0.077505,0.082394,0.082668  
,0.086576,0.088228,0.086282,0.083655,0.081281,0.090781,0.084488,0.0859  
12,0.08846,0.080638,0.081481,0.083165,0.080046,0.08141,0.088013,0.0856  
11,0.084558,0.083818,0.079438  
0.198,0.182,0.19212,0.19671,0.18879,0.18853,0.18879,0.19099,0.19775,0.  
19878,0.18428,0.19683,0.18878,0.18798,0.18815,0.19369,0.19733,0.19336,  
0.1868,0.18643,0.26331,0.33943,0.32629,0.30343,0.19128,0.19899,0.19605  
,0.20074,0.19019,0.18524,0.18622,0.19512,0.19976,0.20141,0.1915,0.1935  
3,0.18909,0.19326,0.19541,0.44756,0.27587,0.27446,0.29432,0.33525,0.30  
041,0.29331,0.19866,0.19482,0.1893,0.18503,0.19176,0.20244,0.1988,0.19  
518,0.18402,0.1998,0.18133,0.19606,0.19835,0.19047,0.18522,0.4679,0.36  
755,0.28604,0.32686,0.33556,0.33629,0.33433,0.3244,0.28466,0.3338,0.20  
448,0.19312,0.19742,0.1914,0.19613,0.19261,0.193,0.19405,0.18889,0.188  
79,0.19125,0.19362,0.19048,0.19402,0.1946,0.40479,0.40537,0.42017,0.26  
855,0.33126,0.27952,0.29489,0.25403,0.24401,0.28879,0.34469,0.32793,0.  
19408,0.1939,0.19129,0.18849,0.18874,0.18956,0.1922,0.19766,0.19234,0.  
19465,0.18984,0.18912,0.18749,0.19674,0.19622,0.18843,0.51616,0.35777,  
0.43147,0.40858,0.31448,0.27643,0.30955,0.32238,0.33282,0.25862,0.2684  
2,0.30516,0.30399,0.23341,0.19039,0.19274,0.19298,0.20289,0.19788,0.19  
045,0.1903,0.18295,0.20263,0.18766,0.19761,0.19871,0.19708,0.18936,0.1

8898,0.19171,0.49133,0.34553,0.48007,0.38724,0.37657,0.40315,0.33743,0.  
.30393,0.29092,0.33349,0.29052,0.32564,0.33431,0.27921,0.27356,0.35585  
,0.18685,0.19572,0.19062,0.19413,0.19209,0.18221,0.19085,0.18644,0.200  
51,0.19706,0.18897,0.1939,0.20193,0.19726,0.18586,0.19079,0.19128,0.45  
867,0.37358,0.48043,0.35313,0.22953,0.40442,0.29437,0.27758,0.24069,0.  
30882,0.29035,0.30147,0.34037,0.31793,0.29386,0.32384,0.28236,0.18529,  
0.2006,0.19315,0.19143,0.19531,0.18778,0.18555,0.19267,0.18914,0.18487  
,0.19889,0.19101,0.19336,0.13855,0.15717,0.13206,0.18875,0.34593,0.460  
07,0.37506,0.42278,0.37159,0.38858,0.33221,0.30639,0.3305,0.3162,0.316  
55,0.31161,0.30455,0.31142,0.31415,0.35948,0.31713,0.32611,0.19335,0.1  
9509,0.1876,0.19261,0.19918,0.19733,0.20425,0.19676,0.19844,0.19228,0.  
18861,0.1307,0.13073,0.14079,0.13695,0.13109,0.13625,0.19149,0.36465,0.  
.43665,0.40456,0.38462,0.45755,0.478,0.37714,0.31577,0.3856,0.33238,0.  
28469,0.34856,0.25939,0.2695,0.29188,0.27167,0.29354,0.30489,0.18356,0.  
.20522,0.19149,0.18983,0.18551,0.19281,0.20504,0.19647,0.19788,0.1386,  
0.12528,0.14717,0.14841,0.13992,0.13376,0.134,0.13183,0.13341,0.19449,  
0.39786,0.43966,0.32731,0.42729,0.34926,0.42052,0.36935,0.28716,0.2716  
3,0.3273,0.29748,0.2984,0.31813,0.29048,0.34055,0.33111,0.29307,0.2669  
4,0.27194,0.19415,0.20297,0.19221,0.18359,0.19314,0.20408,0.13189,0.14  
303,0.14054,0.12737,0.13571,0.13631,0.13198,0.12352,0.12756,0.13304,0.  
13409,0.15448,0.52764,0.34276,0.43519,0.4017,0.38835,0.45673,0.37927,0.  
.2479,0.28769,0.28753,0.3154,0.29259,0.24721,0.29449,0.2953,0.28246,0.  
33382,0.2806,0.31486,0.19439,0.20133,0.18692,0.14197,0.14416,0.1381,0.  
14013,0.13121,0.12775,0.13801,0.14793,0.13584,0.13717,0.13581,0.13675,  
0.13393,0.15003,0.12792,0.42175,0.39493,0.41528,0.41282,0.42103,0.4716  
7,0.41088,0.41752,0.37254,0.29631,0.33248,0.27594,0.28156,0.30169,0.31  
38,0.33494,0.23061,0.34204,0.31282,0.29406,0.13749,0.13377,0.1398,0.13  
74,0.1357,0.13865,0.14189,0.13992,0.14566,0.13948,0.13141,0.14867,0.12  
024,0.12587,0.1384,0.13793,0.12789,0.13252,0.44659,0.45182,0.39551,0.4  
407,0.4426,0.40591,0.41937,0.39089,0.33434,0.30298,0.23391,0.25578,0.2  
0255,0.21085,0.27278,0.23087,0.2541,0.22593,0.25471,0.19258,0.13218,0.  
14106,0.1346,0.1416,0.14012,0.13912,0.13548,0.1324,0.1307,0.13501,0.15  
226,0.13398,0.13169,0.13344,0.13898,0.15104,0.13742,0.1414,0.53093,0.2  
7237,0.4581,0.32153,0.43955,0.28904,0.37257,0.3473,0.34897,0.24519,0.1  
9078,0.2362,0.23065,0.20298,0.21036,0.24772,0.23553,0.26496,0.23898,0.  
26377,0.12921,0.15243,0.14887,0.13186,0.13758,0.14102,0.13892,0.13845,  
0.13371,0.13057,0.16574,0.12608,0.13727,0.12041,0.13754,0.14634,0.1315  
6,0.12742,0.42956,0.46388,0.41554,0.30517,0.52937,0.37969,0.34491,0.21  
991,0.23663,0.2233,0.22757,0.23826,0.23998,0.24268,0.22005,0.22543,0.2  
2859,0.22422,0.20931,0.24294,0.11585,0.13802,0.12633,0.13845,0.13727,0.  
.14818,0.13331,0.14139,0.13675,0.13553,0.13684,0.13761,0.13991,0.13967  
,0.13876,0.14152,0.13743,0.12485,0.32883,0.41704,0.37721,0.38492,0.315  
59,0.33738,0.22905,0.26845,0.2345,0.25027,0.20915,0.26364,0.21134,0.22  
79,0.24932,0.2327,0.22674,0.23481,0.19273,0.23505,0.14498,0.13598,0.12  
133,0.14333,0.14303,0.13559,0.14066,0.13233,0.13018,0.13081,0.14287,0.  
12785,0.15049,0.1448,0.13383,0.13049,0.13883,0.14435,0.51259,0.38684,0.  
.42409,0.41772,0.50131,0.29496,0.22169,0.27932,0.33677,0.26661,0.21941  
,0.22089,0.1851,0.25238,0.19527,0.21127,0.18992,0.22473,0.23632,0.2360  
5,0.13592,0.13852,0.13725,0.15342,0.1488,0.13538,0.14626,0.13608,0.134  
4,0.13304,0.14468,0.15415,0.12491,0.13477,0.13656,0.13278,0.133,0.1348  
4,0.36117,0.37575,0.3783,0.26711,0.24995,0.21384,0.32256,0.24258,0.204  
75,0.2553,0.25083,0.21541,0.18632,0.25416,0.22482,0.20122,0.24501,0.22

397,0.2764,0.29142,0.12663,0.13819,0.13209,0.14011,0.12554,0.13774,0.1  
3724,0.14573,0.13789,0.13054,0.12987,0.13851,0.13848,0.12951,0.12675,0  
.14363,0.13919,0.13882,0.47155,0.30957,0.22679,0.23218,0.25375,0.29383  
,0.25371,0.27303,0.2084,0.28712,0.20273,0.21856,0.29054,0.22436,0.2144  
9,0.22607,0.22612,0.21895,0.22069,0.14425,0.13454,0.13526,0.13349,0.13  
397,0.1449,0.13242,0.14244,0.14523,0.13854,0.16172,0.1324,0.14123,0.14  
188,0.13385,0.14221,0.14087,0.078055,0.22381,0.21767,0.24375,0.29671,0  
.28427,0.2383,0.19934,0.26146,0.20639,0.26238,0.22685,0.25119,0.23328,  
0.2499,0.22713,0.19065,0.25021,0.21964,0.2145,0.14636,0.13558,0.13354,  
0.14143,0.13696,0.14258,0.13816,0.13317,0.13212,0.13236,0.14346,0.1394  
2,0.13335,0.14272,0.1388,0.13128,0.13922,0.077747,0.23388,0.22312,0.24  
264,0.19009,0.28315,0.19042,0.28525,0.23278,0.26932,0.20007,0.2379,0.2  
1999,0.23733,0.19862,0.20317,0.28108,0.19341,0.2066,0.12643,0.13724,0.  
13654,0.13357,0.12014,0.14157,0.13479,0.13132,0.13213,0.13823,0.14899,  
0.14374,0.13753,0.13391,0.13684,0.13098,0.1338,0.13268,0.076157,0.3118  
3,0.30098,0.24014,0.23133,0.27445,0.2429,0.28938,0.16825,0.19303,0.237  
48,0.24711,0.1942,0.20751,0.2273,0.26584,0.27779,0.26265,0.20437,0.140  
95,0.12588,0.14288,0.12648,0.13176,0.13232,0.1348,0.13996,0.15884,0.13  
266,0.13664,0.12925,0.13663,0.13789,0.12834,0.14115,0.14656,0.079807,0  
.077451,0.078129,0.20707,0.28203,0.24498,0.24785,0.24698,0.1273,0.2261  
8,0.24165,0.20492,0.17989,0.21463,0.2177,0.27618,0.22899,0.21761,0.120  
95,0.13606,0.13296,0.13261,0.13778,0.13614,0.1429,0.1243,0.1353,0.1311  
7,0.12654,0.15297,0.14172,0.14093,0.13065,0.13874,0.1325,0.13898,0.077  
506,0.080608,0.074883,0.079305,0.25142,0.27011,0.29461,0.2529,0.25402,  
0.25434,0.23718,0.2703,0.2702,0.22828,0.20419,0.2203,0.13558,0.13329,0  
.17768,0.13379,0.14313,0.14475,0.13059,0.13361,0.1297,0.13144,0.15065,  
0.1408,0.13498,0.12642,0.14712,0.1359,0.13027,0.14028,0.13095,0.12756,  
0.077583,0.074538,0.074602,0.073986,0.078329,0.07924,0.22918,0.20483,0  
.20161,0.27279,0.21918,0.23406,0.26137,0.27257,0.14661,0.13502,0.14115  
,0.14,0.14309,0.1422,0.13928,0.13686,0.14128,0.12915,0.14127,0.11702,0  
.15152,0.11962,0.13798,0.13629,0.15076,0.13809,0.1364,0.13569,0.13609,  
0.14186,0.11759,0.078819,0.081499,0.081174,0.078466,0.077311,0.073375,  
0.21169,0.24149,0.29523,0.20306,0.25975,0.079709,0.077916,0.14163,0.12  
867,0.13132,0.1414,0.12825,0.13865,0.12181,0.12806,0.14296,0.13521,0.1  
3445,0.14055,0.13778,0.13011,0.13053,0.13094,0.14095,0.14383,0.14046,0  
.13709,0.11796,0.075703,0.076072,0.078953,0.079327,0.078057,0.075386,0  
.075818,0.078061,0.076611,0.077515,0.19699,0.23032,0.082063,0.077938,0  
.080666,0.076327,0.14093,0.13034,0.14139,0.13786,0.15376,0.14695,0.151  
56,0.13946,0.14023,0.13072,0.12788,0.13839,0.1318,0.13613,0.12279,0.11  
548,0.14007,0.13541,0.14183,0.075277,0.078221,0.079358,0.081669,0.0808  
08,0.076373,0.077812,0.076556,0.072337,0.078946,0.080081,0.081352,0.08  
5209,0.081555,0.081667,0.079126,0.084334,0.15173,0.14145,0.12621,0.140  
76,0.12703,0.13483,0.13254,0.13353,0.12541,0.12894,0.13977,0.13227,0.1  
3698,0.13998,0.13708,0.14066,0.08181,0.084482,0.085448,0.074424,0.0760  
99,0.078798,0.080165,0.078277,0.078905,0.080447,0.076752,0.081108,0.08  
0203,0.07825,0.080215,0.074603,0.079374,0.081268,0.083876,0.14148,0.13  
117,0.12807,0.13845,0.13436,0.12429,0.15084,0.12929,0.16061,0.13924,0.  
12852,0.13079,0.13891,0.07814,0.075927,0.075785,0.077615,0.075518,0.08  
179,0.077614,0.080702,0.081116,0.082274,0.081694,0.079103,0.080796,0.0  
81773,0.078954,0.078605,0.079505,0.081589,0.080473,0.080584,0.079513,0  
.13635,0.13594,0.13377,0.14067,0.13847,0.14147,0.13782,0.14208,0.14595  
,0.072348,0.081654,0.083274,0.080313,0.078493,0.075787,0.080831,0.0837

15,0.081414,0.081217,0.076128,0.081476,0.078839,0.077189,0.077769,0.08  
0241,0.081856,0.083445,0.073105,0.080071,0.079891,0.077259,0.077847,0.  
078265,0.081009,0.13216,0.13464,0.13573,0.13405,0.081738,0.073303,0.06  
9922,0.079723,0.077481,0.073222,0.082685,0.077707,0.080262,0.076117,0.  
075953,0.078449,0.07617,0.079577,0.079974,0.077995,0.076776,0.079791,0.  
.077377,0.079302,0.079046,0.07688,0.078021,0.076014,0.07694,0.079715,0.  
.081854,0.079127,0.078016,0.074301,0.079704,0.075556,0.078246,0.078259  
,0.075457,0.079566,0.077017,0.079581,0.077807,0.079149,0.077457,0.0823  
57,0.081138,0.073405,0.078965,0.074976,0.077917,0.079403,0.078282,0.07  
7112,0.071416,0.081922,0.080886,0.075393,0.077418,0.081041,0.076367,0.  
081039,0.075573,0.077712,0.080006,0.074746,0.078319,0.078564,0.084577,  
0.08321,0.084623,0.081405,0.078394,0.076379,0.078125,0.077483,0.081916  
,0.080248,0.085635,0.080146,0.077629,0.07947,0.079499,0.076346,0.07895  
1,0.077628,0.077928,0.07812,0.08494,0.079098,0.080854,0.083175,0.07837  
1,0.078038,0.078305,0.075891,0.078358,0.079898,0.07756,0.07998,0.07726  
2,0.075866,0.071176,0.078658,0.07698,0.082752,0.085353,0.079439,0.0773  
1,0.074102,0.0786,0.084167,0.082569,0.074341,0.078879,0.079592,0.07612  
9,0.079121,0.07988,0.07527,0.078397,0.076386,0.079044,0.078476,0.07734  
9,0.077819,0.082633,0.080833,0.081937,0.077537,0.076302,0.082187,0.075  
972,0.078024,0.07973,0.080787,0.086652,0.08121,0.077086,0.074491,0.083  
001,0.078343,0.082551,0.079939,0.08034,0.072606,0.081646,0.076309,0.07  
3508,0.079798,0.079391,0.072993,0.07433,0.080094,0.077659,0.078271,0.0  
78599,0.078957,0.076033,0.077477,0.078046,0.075893,0.078554,0.078268,0  
.079564,0.075849,0.080487,0.079226,0.079597,0.078838,0.078598,0.076241  
,0.082315,0.073281,0.075665,0.076069,0.08085,0.072488,0.076836,0.07587  
3,0.079207,0.078827,0.079817,0.075282,0.075106,0.081946,0.079732,0.079  
265,0.083132,0.072605,0.075691,0.076216,0.073883,0.073133,0.079074,0.0  
80295,0.078032,0.076276,0.073454  
0.20048,0.18431,0.19466,0.19957,0.19252,0.19408,0.19348,0.19278,0.2011  
5,0.19867,0.18877,0.19481,0.19502,0.19018,0.18719,0.19644,0.20223,0.19  
748,0.18974,0.18941,0.22963,0.34682,0.34027,0.30713,0.19367,0.20248,0.  
19739,0.20243,0.18949,0.18797,0.18819,0.19704,0.2028,0.20382,0.19613,0  
.19799,0.1905,0.19491,0.19225,0.42076,0.27812,0.26558,0.28744,0.31531,  
0.2751,0.30737,0.19825,0.19534,0.19014,0.19181,0.19053,0.20783,0.20183  
,0.19939,0.18819,0.20229,0.18665,0.19989,0.20081,0.1888,0.19003,0.5032  
9,0.36649,0.26633,0.31601,0.33461,0.3153,0.32796,0.30662,0.28028,0.347  
09,0.20612,0.19112,0.20058,0.19196,0.20144,0.19326,0.19591,0.20152,0.1  
9579,0.18764,0.19263,0.19315,0.18962,0.19112,0.1951,0.4049,0.38217,0.4  
1828,0.26671,0.32746,0.28313,0.28035,0.26677,0.23523,0.27457,0.34655,0  
.31567,0.20034,0.20181,0.1987,0.18967,0.19401,0.19785,0.19887,0.20295,  
0.19489,0.19435,0.19125,0.19385,0.18934,0.1977,0.1999,0.18971,0.48592,  
0.36044,0.44943,0.39983,0.31055,0.27839,0.31022,0.32212,0.32077,0.2627  
9,0.27774,0.30523,0.30221,0.25373,0.19116,0.19793,0.1956,0.19888,0.202  
74,0.19497,0.193,0.18475,0.20417,0.18723,0.19862,0.19574,0.19942,0.193  
94,0.19228,0.19426,0.48825,0.32214,0.46185,0.39987,0.37089,0.359,0.325  
81,0.30056,0.28451,0.32746,0.28875,0.31513,0.31114,0.25336,0.27195,0.3  
4937,0.18968,0.20061,0.19178,0.19376,0.19379,0.18534,0.19082,0.19129,0  
.20293,0.19717,0.19038,0.19406,0.20331,0.19701,0.18688,0.19181,0.19229  
,0.43321,0.36962,0.4494,0.3674,0.22018,0.4079,0.28773,0.28671,0.2446,0  
.31509,0.27661,0.28123,0.31448,0.30608,0.27861,0.32956,0.27664,0.18503  
,0.20085,0.19806,0.19337,0.20058,0.19382,0.18856,0.19554,0.18974,0.190  
28,0.19956,0.19332,0.19145,0.13609,0.15743,0.13088,0.19448,0.36733,0.4

5741,0.36177,0.41915,0.37543,0.38106,0.30846,0.30112,0.33966,0.32798,0.30064,0.27892,0.32209,0.29859,0.30699,0.35099,0.33667,0.3125,0.19124,0.19845,0.18401,0.18989,0.20013,0.19479,0.20536,0.19594,0.20581,0.1953,0.19122,0.12924,0.13225,0.13905,0.13461,0.12887,0.13412,0.19397,0.36077,0.45442,0.36176,0.37606,0.44651,0.44283,0.34502,0.30897,0.36044,0.3276,0.28923,0.33379,0.25783,0.27686,0.27366,0.25512,0.28205,0.29719,0.18623,0.20827,0.19255,0.18705,0.18738,0.19352,0.20321,0.19594,0.20181,0.13641,0.12232,0.1459,0.14863,0.13945,0.13276,0.13044,0.12932,0.1312,0.19329,0.3765,0.42059,0.29729,0.43229,0.32327,0.38374,0.37648,0.26286,0.26421,0.30917,0.29172,0.28522,0.32355,0.26722,0.31165,0.34854,0.29249,0.27835,0.23464,0.20154,0.20624,0.19785,0.18682,0.19851,0.20593,0.12784,0.14041,0.13686,0.12475,0.1347,0.13406,0.13065,0.123,0.12355,0.12968,0.13123,0.15376,0.54208,0.37347,0.42684,0.38257,0.39736,0.42033,0.33804,0.23759,0.3069,0.26849,0.32013,0.26743,0.26898,0.29311,0.29126,0.28436,0.32987,0.25498,0.30603,0.19547,0.20342,0.19139,0.14275,0.14137,0.13896,0.13944,0.12807,0.12487,0.13395,0.14504,0.13369,0.13683,0.13262,0.1355,0.12998,0.1519,0.12692,0.43644,0.38238,0.38254,0.37719,0.40006,0.45841,0.43034,0.41161,0.3532,0.2974,0.30874,0.27438,0.2753,0.30217,0.32261,0.33104,0.22949,0.33453,0.29011,0.27482,0.13539,0.13411,0.13683,0.1344,0.13393,0.1406,0.13848,0.13692,0.14197,0.137,0.1291,0.147,0.11639,0.12323,0.13567,0.13766,0.12483,0.12943,0.40005,0.43976,0.35597,0.42039,0.43685,0.40435,0.38191,0.374,0.32999,0.29411,0.23909,0.24113,0.207,0.21921,0.27423,0.23079,0.24431,0.2195,0.24685,0.19899,0.13096,0.13836,0.13358,0.14176,0.14045,0.13735,0.13545,0.13181,0.12801,0.13554,0.15087,0.13383,0.12771,0.13475,0.13955,0.15086,0.13574,0.14029,0.54622,0.2865,0.41558,0.35493,0.44243,0.29516,0.3931,0.35102,0.35434,0.24993,0.18634,0.22907,0.21563,0.19143,0.22328,0.22728,0.22147,0.25658,0.22126,0.25483,0.12906,0.14838,0.14685,0.12934,0.13504,0.1379,0.13596,0.13534,0.1311,0.12774,0.16393,0.12493,0.13645,0.11853,0.13644,0.14293,0.13009,0.12412,0.43154,0.42307,0.37347,0.32291,0.55497,0.37463,0.3441,0.19201,0.22693,0.17885,0.21517,0.23203,0.22875,0.23468,0.21807,0.21451,0.2195,0.207,0.19804,0.24746,0.11388,0.1378,0.1244,0.1395,0.13725,0.14975,0.13295,0.13797,0.13321,0.13203,0.13115,0.13197,0.13569,0.13855,0.13617,0.13829,0.13624,0.12033,0.30668,0.44511,0.38686,0.3574,0.32387,0.32128,0.20784,0.25739,0.23566,0.24236,0.21654,0.26696,0.20681,0.22498,0.24798,0.23124,0.22149,0.23057,0.18258,0.21954,0.14231,0.13161,0.12229,0.14407,0.14082,0.13485,0.13811,0.1295,0.12766,0.13306,0.13851,0.12356,0.14665,0.14496,0.13358,0.12926,0.13732,0.14293,0.46431,0.35815,0.38695,0.38991,0.44203,0.27991,0.21643,0.24763,0.32259,0.23352,0.23483,0.21033,0.19119,0.23051,0.18683,0.20583,0.18555,0.20971,0.23666,0.23228,0.13472,0.1357,0.13549,0.15095,0.14791,0.13487,0.1481,0.13437,0.13484,0.13137,0.14115,0.15044,0.12393,0.13347,0.136,0.12723,0.13253,0.1347,0.3493,0.33565,0.38421,0.266,0.23897,0.19861,0.28526,0.24057,0.21314,0.20903,0.24898,0.21896,0.17517,0.25781,0.21789,0.20154,0.23618,0.20905,0.26755,0.28068,0.12418,0.13405,0.13152,0.13848,0.12266,0.13601,0.1378,0.14442,0.13776,0.12453,0.12879,0.134,0.13566,0.12932,0.12628,0.14455,0.13931,0.13649,0.46231,0.29076,0.21721,0.21388,0.24504,0.25858,0.23488,0.26235,0.19742,0.27826,0.19283,0.22134,0.27247,0.21655,0.22053,0.22594,0.21816,0.21989,0.2074,0.14173,0.13292,0.135,0.13124,0.13055,0.14289,0.12876,0.14312,0.14716,0.13556,0.16253,0.13141,0.14299,0.1389,0.13116,0.14271,0.14166,0.072596,0.24403,0.21486,0.23065,0.2701,0.27069,0.24207,0.17848,0.2316,0.18976,0.22583,0.22562,0.24158,0.23046,0.

25056,0.23127,0.18999,0.24293,0.21315,0.21231,0.14431,0.13734,0.13152,  
0.14053,0.13371,0.14063,0.13827,0.13258,0.13186,0.12917,0.14064,0.1384  
3,0.12862,0.13764,0.13711,0.12946,0.13518,0.074114,0.21698,0.24106,0.2  
4301,0.19589,0.27189,0.19059,0.25435,0.23049,0.26712,0.20581,0.2314,0.  
22052,0.23452,0.19223,0.19729,0.26955,0.1877,0.20725,0.12538,0.13513,0  
.13142,0.13137,0.11747,0.13972,0.13118,0.12641,0.12725,0.138,0.14695,0  
.13974,0.13538,0.13489,0.1352,0.1335,0.13339,0.13093,0.070839,0.27721,  
0.2896,0.22175,0.21681,0.27152,0.20945,0.27092,0.15623,0.19195,0.21709  
,0.22355,0.19214,0.2005,0.22024,0.24969,0.26489,0.25475,0.19992,0.1380  
1,0.12365,0.14133,0.12539,0.13041,0.13288,0.13099,0.13808,0.15866,0.12  
943,0.13707,0.12572,0.13599,0.1333,0.12543,0.13998,0.1458,0.073847,0.0  
76043,0.073262,0.19998,0.25245,0.25722,0.22526,0.2396,0.12368,0.21467,  
0.23745,0.19702,0.17994,0.20178,0.20823,0.26959,0.23642,0.21302,0.1192  
3,0.1333,0.13356,0.12917,0.1346,0.13518,0.13625,0.12106,0.13408,0.1287  
,0.12261,0.15188,0.1427,0.13774,0.12788,0.13453,0.13189,0.13762,0.0739  
94,0.075242,0.070922,0.072606,0.24977,0.27619,0.26023,0.24345,0.22799,  
0.24259,0.24411,0.24764,0.24423,0.23554,0.2036,0.21757,0.1344,0.13311,  
0.17736,0.12999,0.14365,0.13948,0.12926,0.13204,0.13088,0.12854,0.1487  
7,0.13952,0.1307,0.1245,0.14696,0.13415,0.12942,0.14092,0.12903,0.1252  
7,0.071285,0.070917,0.06969,0.07031,0.072483,0.072733,0.19796,0.17556,  
0.19073,0.24024,0.22653,0.21726,0.23877,0.24366,0.14338,0.13289,0.1384  
6,0.13708,0.14006,0.14427,0.13815,0.13369,0.14102,0.12549,0.14018,0.11  
506,0.15053,0.11843,0.13713,0.12877,0.15079,0.13551,0.13465,0.13447,0.  
13458,0.14107,0.11501,0.073833,0.07537,0.076743,0.073983,0.07315,0.067  
815,0.22817,0.22592,0.29192,0.19221,0.23166,0.07455,0.071403,0.1414,0.  
12434,0.13136,0.13838,0.12496,0.13981,0.12046,0.1278,0.14006,0.13431,0  
.13399,0.13715,0.13485,0.12938,0.13157,0.1282,0.13951,0.14546,0.13863,  
0.13686,0.11509,0.0711,0.070431,0.072854,0.075356,0.071568,0.06861,0.0  
71588,0.071875,0.072155,0.071298,0.19639,0.24623,0.076902,0.071366,0.0  
76901,0.071945,0.14066,0.1278,0.13982,0.13446,0.15534,0.14637,0.15184,  
0.13736,0.13816,0.12864,0.12498,0.13628,0.13338,0.13269,0.12421,0.1129  
1,0.13737,0.13482,0.14033,0.069905,0.072784,0.075571,0.073232,0.073382  
,0.069603,0.070872,0.070689,0.066795,0.072739,0.073148,0.075077,0.0781  
01,0.075204,0.075209,0.072075,0.078696,0.15158,0.1393,0.12456,0.13765,  
0.12384,0.13637,0.13077,0.13281,0.12187,0.12456,0.13878,0.13337,0.1351  
8,0.13977,0.13363,0.13592,0.075136,0.078722,0.078373,0.067327,0.070703  
,0.072299,0.073247,0.074016,0.071339,0.07568,0.069782,0.074114,0.07379  
7,0.070493,0.072589,0.070201,0.074694,0.074833,0.07892,0.14337,0.13012  
,0.12755,0.13737,0.13208,0.12093,0.14896,0.12667,0.16061,0.13522,0.126  
79,0.1272,0.13875,0.072483,0.069958,0.071421,0.073081,0.071738,0.07752  
1,0.07081,0.076311,0.074481,0.075814,0.075488,0.073226,0.07601,0.07617  
,0.074907,0.073588,0.073615,0.075885,0.074769,0.074163,0.072594,0.1352  
3,0.13469,0.13158,0.13838,0.13526,0.13696,0.137,0.13963,0.14372,0.0679  
2,0.07557,0.078784,0.074681,0.073496,0.068275,0.075606,0.079175,0.0755  
16,0.076535,0.071431,0.075359,0.074136,0.071797,0.072261,0.074756,0.07  
6499,0.076125,0.069356,0.070893,0.073402,0.071507,0.070646,0.07276,0.0  
75482,0.13215,0.13313,0.13324,0.13241,0.076243,0.066497,0.063701,0.075  
109,0.071265,0.066451,0.077032,0.0721,0.076305,0.069402,0.072285,0.073  
777,0.071555,0.075455,0.075568,0.069872,0.070932,0.074343,0.072076,0.0  
72413,0.072675,0.071634,0.071339,0.071681,0.071047,0.074367,0.07607,0.  
073002,0.073319,0.067392,0.07199,0.069207,0.075166,0.073017,0.06788,0.  
07255,0.071336,0.073255,0.07339,0.073377,0.073399,0.076253,0.073961,0.

067516,0.074322,0.070144,0.07159,0.072589,0.073457,0.071745,0.065646,0.075484,0.077346,0.069769,0.07235,0.07571,0.071125,0.075192,0.067983,0.072531,0.07394,0.071094,0.072442,0.072041,0.079599,0.076877,0.078798,0.073617,0.073739,0.069038,0.072401,0.074109,0.076672,0.07233,0.078592,0.073055,0.072207,0.073431,0.073525,0.070964,0.072587,0.071783,0.074368,0.072991,0.077371,0.071031,0.074701,0.080469,0.072976,0.072766,0.071559,0.0702,0.072324,0.076215,0.072619,0.075038,0.069864,0.071942,0.06614,0.074397,0.068624,0.07544,0.078791,0.073961,0.073989,0.06741,0.072788,0.07908,0.079414,0.069021,0.073222,0.072828,0.071333,0.073001,0.074191,0.070379,0.073167,0.068909,0.073375,0.071363,0.071192,0.07086,0.076843,0.07644,0.074377,0.072557,0.070304,0.07792,0.069081,0.074009,0.07323,0.075601,0.07824,0.075898,0.073514,0.06877,0.07604,0.070964,0.076348,0.073402,0.075347,0.066338,0.080574,0.071563,0.066809,0.071627,0.073648,0.068517,0.06787,0.075508,0.072154,0.072478,0.075197,0.073756,0.070991,0.072372,0.073362,0.070796,0.075159,0.070955,0.073831,0.068882,0.07414,0.074304,0.073451,0.073248,0.07204,0.07197,0.077528,0.068046,0.069316,0.070079,0.074059,0.067935,0.068818,0.071985,0.075287,0.072279,0.073211,0.06823,0.069756,0.074937,0.075614,0.073665,0.076718,0.068953,0.070572,0.069208,0.069253,0.068202,0.074353,0.075514,0.072095,0.071489,0.069211

0.19962,0.18642,0.19851,0.2064,0.19252,0.19603,0.19249,0.1905,0.20332,0.19879,0.18673,0.20106,0.19756,0.19129,0.19273,0.19949,0.2048,0.20191,0.1926,0.1919,0.24703,0.34615,0.32614,0.31134,0.19496,0.20442,0.19605,0.20517,0.1967,0.18638,0.19449,0.20097,0.20595,0.19933,0.19877,0.19885,0.19293,0.1958,0.19203,0.37693,0.28757,0.25054,0.29663,0.3082,0.26992,0.27083,0.19655,0.19832,0.19338,0.19355,0.19521,0.20836,0.2026,0.20321,0.1911,0.20183,0.1901,0.20441,0.20299,0.18763,0.19044,0.50337,0.34738,0.27455,0.30826,0.32058,0.30125,0.32784,0.29089,0.263,0.34281,0.20739,0.19163,0.19804,0.19524,0.20014,0.19284,0.19388,0.20535,0.1963,0.18425,0.19537,0.19078,0.19562,0.19778,0.20052,0.425,0.3652,0.36996,0.25661,0.30709,0.26829,0.27861,0.26323,0.24472,0.26967,0.34892,0.31997,0.20255,0.20424,0.19907,0.19347,0.19447,0.20051,0.20663,0.20586,0.19773,0.19849,0.19123,0.19541,0.19483,0.20274,0.2035,0.19473,0.44454,0.31008,0.43086,0.39708,0.30578,0.27799,0.29372,0.31171,0.3061,0.26881,0.26425,0.30745,0.3104,0.26225,0.19659,0.20243,0.19413,0.20155,0.20196,0.19764,0.19742,0.18849,0.20603,0.19338,0.20075,0.20102,0.19729,0.19577,0.19623,0.194,0.44764,0.3242,0.44099,0.38274,0.36506,0.38087,0.33146,0.32448,0.29513,0.30805,0.28264,0.30946,0.29305,0.24078,0.27295,0.31861,0.19214,0.20411,0.1955,0.19647,0.19492,0.18287,0.1966,0.1937,0.2052,0.19923,0.19129,0.19547,0.20517,0.19831,0.19143,0.19784,0.19848,0.4549,0.36895,0.43402,0.35881,0.21748,0.40934,0.29036,0.25912,0.23633,0.2986,0.26711,0.27405,0.32037,0.29691,0.25839,0.3259,0.2821,0.18594,0.2045,0.20166,0.19685,0.19903,0.19444,0.1902,0.19378,0.18998,0.19024,0.20018,0.19782,0.19744,0.13317,0.15739,0.12968,0.1965,0.35359,0.46313,0.40308,0.39522,0.34506,0.33528,0.27837,0.27834,0.32092,0.3454,0.32033,0.28125,0.33513,0.28932,0.31112,0.33315,0.30521,0.2818,0.19323,0.20242,0.18751,0.1901,0.20023,0.19542,0.20479,0.19295,0.20748,0.19592,0.1923,0.12852,0.13055,0.13695,0.13457,0.12841,0.13396,0.19881,0.35538,0.4343,0.37375,0.37126,0.40335,0.38787,0.32459,0.33038,0.36176,0.31335,0.29105,0.32935,0.26524,0.26597,0.23639,0.26392,0.27899,0.31062,0.1899,0.208,0.19745,0.18903,0.18811,0.19735,0.20282,0.19831,0.20645,0.1332,0.11878,0.14337,0.14645,0.13942,0.13036,0.12773,0.12388,0.12992,0.19803,0.38748,0.4

4272,0.31756,0.40845,0.31872,0.40754,0.3679,0.25136,0.28587,0.29424,0.30472,0.28992,0.32681,0.25696,0.29288,0.33323,0.27339,0.28197,0.25959,0.20205,0.20634,0.19843,0.19063,0.202,0.20606,0.1261,0.13813,0.13285,0.12107,0.13522,0.13418,0.12698,0.12102,0.1221,0.13101,0.13225,0.15067,0.51817,0.35621,0.41729,0.38785,0.39821,0.42685,0.35661,0.233,0.29912,0.2636,0.31424,0.24217,0.2701,0.28222,0.26934,0.27956,0.31718,0.2714,0.28927,0.19694,0.2059,0.19611,0.14183,0.13771,0.1396,0.13483,0.12592,0.12051,0.13241,0.14694,0.13344,0.13801,0.12792,0.13608,0.131,0.15,0.12724,0.41234,0.36172,0.44195,0.36996,0.37937,0.45777,0.40203,0.38319,0.31172,0.30838,0.30012,0.29193,0.2931,0.30381,0.31972,0.32712,0.24399,0.3196,0.3022,0.26701,0.1337,0.13308,0.13545,0.13301,0.1333,0.14236,0.13498,0.13418,0.14353,0.13483,0.12731,0.14598,0.11665,0.12215,0.13439,0.14027,0.12316,0.12854,0.35945,0.42289,0.36052,0.3688,0.37874,0.38428,0.38439,0.37702,0.34632,0.29537,0.24275,0.23931,0.2041,0.22317,0.27079,0.23506,0.23018,0.21937,0.24026,0.19791,0.12947,0.13524,0.13185,0.14094,0.13689,0.13536,0.13284,0.1282,0.12368,0.13326,0.14935,0.1328,0.12553,0.13351,0.13561,0.14969,0.13218,0.13788,0.55615,0.30869,0.42905,0.2934,0.39197,0.27641,0.36768,0.33836,0.32861,0.24408,0.18845,0.21752,0.22533,0.19194,0.20507,0.22769,0.21238,0.25391,0.21771,0.24674,0.12481,0.14625,0.14689,0.12764,0.13228,0.13636,0.13501,0.13369,0.12922,0.12619,0.16431,0.1235,0.1356,0.11407,0.13791,0.14402,0.12887,0.12559,0.45042,0.40343,0.33582,0.33103,0.58299,0.36877,0.32684,0.1594,0.23263,0.18937,0.23236,0.21078,0.22621,0.24167,0.20877,0.21137,0.21079,0.19764,0.18184,0.23168,0.10943,0.13723,0.12344,0.13876,0.13543,0.14702,0.13226,0.13902,0.13252,0.12648,0.12861,0.13071,0.13547,0.13848,0.13397,0.13555,0.13518,0.11868,0.36054,0.40461,0.38649,0.33156,0.33868,0.28943,0.1872,0.25048,0.23299,0.22503,0.21149,0.25664,0.21622,0.22369,0.25711,0.22167,0.21505,0.22875,0.18126,0.22027,0.14019,0.13131,0.11901,0.14452,0.13849,0.13489,0.13642,0.12541,0.12669,0.13372,0.14,0.12187,0.14639,0.14456,0.1286,0.12868,0.137,0.14064,0.4162,0.37694,0.37216,0.35912,0.43678,0.27776,0.21935,0.2321,0.31801,0.22536,0.21634,0.20081,0.19989,0.22158,0.19816,0.19579,0.18335,0.20064,0.25299,0.24775,0.13157,0.13472,0.13459,0.14742,0.14232,0.13231,0.14764,0.13331,0.13327,0.13066,0.13839,0.15041,0.12168,0.13106,0.13428,0.12436,0.13018,0.13391,0.3557,0.3112,0.40486,0.27749,0.22131,0.19227,0.25079,0.22178,0.21114,0.22624,0.22663,0.20621,0.17488,0.26009,0.21519,0.19239,0.21921,0.21514,0.2752,0.26256,0.12261,0.13041,0.12898,0.133,0.12385,0.1334,0.1369,0.14472,0.14062,0.12346,0.12784,0.13581,0.12978,0.12821,0.12459,0.14376,0.13816,0.13599,0.45896,0.26902,0.23097,0.21126,0.23604,0.24027,0.21753,0.26375,0.18214,0.2777,0.19212,0.22001,0.26587,0.22405,0.2109,0.21139,0.20312,0.20957,0.21375,0.13912,0.13197,0.13334,0.12929,0.12862,0.14671,0.13087,0.13924,0.1448,0.13577,0.16032,0.12882,0.1412,0.13464,0.13279,0.14241,0.13791,0.067953,0.22895,0.20148,0.20823,0.25108,0.29022,0.24314,0.18905,0.19704,0.20985,0.21424,0.23284,0.23809,0.23153,0.25215,0.22577,0.18598,0.23874,0.21065,0.20851,0.14172,0.13707,0.13087,0.14119,0.13205,0.13903,0.13366,0.13302,0.12907,0.1274,0.14126,0.13751,0.12783,0.13581,0.13541,0.12658,0.13232,0.067568,0.21668,0.24622,0.22509,0.18821,0.25279,0.19004,0.25492,0.22732,0.25753,0.20859,0.23177,0.19765,0.22276,0.19277,0.18805,0.27783,0.18185,0.20855,0.12752,0.13014,0.13165,0.12818,0.11566,0.13691,0.1302,0.12549,0.12589,0.13693,0.14586,0.13804,0.13221,0.13297,0.13356,0.1326,0.13157,0.12998,0.064967,0.27208,0.27919,0.2231,0.21648,0.26181,0.22336,0.28789,0.14587,0.1885,0.2152,0.21718,0.191,0.



20297,0.21544,0.23423,0.25733,0.24282,0.20622,0.13716,0.12276,0.14021,  
0.12396,0.1292,0.13164,0.13122,0.13713,0.15882,0.1307,0.13447,0.12381,  
0.13415,0.13225,0.12506,0.13862,0.14538,0.068768,0.071944,0.070526,0.1  
9534,0.26871,0.26393,0.218,0.22894,0.11355,0.20519,0.24997,0.19381,0.1  
8274,0.20233,0.21125,0.24297,0.23641,0.21162,0.11668,0.13293,0.13155,0  
.12769,0.13567,0.13422,0.13589,0.11894,0.13122,0.12619,0.11709,0.14854  
,0.14227,0.13644,0.12676,0.1334,0.12852,0.13212,0.069145,0.070462,0.06  
6918,0.067601,0.22383,0.26699,0.25917,0.24359,0.23989,0.24562,0.22714,  
0.25516,0.24026,0.23075,0.19879,0.22465,0.13395,0.1315,0.17471,0.12972  
,0.14203,0.13835,0.1263,0.13092,0.1277,0.12642,0.14744,0.13754,0.12943  
,0.12428,0.14753,0.13443,0.12673,0.13909,0.12925,0.12217,0.067928,0.06  
6781,0.065611,0.065146,0.068962,0.070732,0.19006,0.16568,0.18276,0.210  
7,0.22672,0.20768,0.22494,0.21534,0.14039,0.13255,0.13664,0.13588,0.13  
703,0.14473,0.13867,0.13482,0.13966,0.12509,0.13895,0.11323,0.14958,0.  
11631,0.13559,0.13016,0.15151,0.13547,0.13218,0.13285,0.13205,0.13987,  
0.11197,0.070773,0.070097,0.071607,0.069147,0.067189,0.063654,0.20099,  
0.20698,0.2775,0.17563,0.22938,0.070399,0.068424,0.13976,0.12138,0.129  
36,0.13725,0.12168,0.139,0.11683,0.12622,0.14016,0.13367,0.13345,0.135  
06,0.13531,0.1275,0.13176,0.13137,0.13677,0.14434,0.13777,0.13311,0.11  
184,0.064973,0.067118,0.067625,0.070623,0.066561,0.064725,0.067184,0.0  
66513,0.065947,0.067981,0.18935,0.21648,0.071567,0.065588,0.071502,0.0  
67271,0.14072,0.12805,0.13692,0.13257,0.15417,0.14532,0.14942,0.13679,  
0.13639,0.12618,0.12235,0.13668,0.1314,0.1303,0.1237,0.11294,0.13866,0  
.13462,0.13885,0.066417,0.068762,0.070679,0.069577,0.069473,0.064271,0  
.066785,0.067181,0.062634,0.067448,0.069264,0.069418,0.073775,0.068223  
,0.069745,0.06579,0.07,0.15144,0.13972,0.12363,0.13644,0.12507,0.13446  
,0.12912,0.13031,0.12002,0.12364,0.13621,0.13142,0.13451,0.13761,0.132  
78,0.13229,0.072173,0.074303,0.07215,0.065557,0.065403,0.06623,0.07002  
7,0.06747,0.065392,0.069594,0.06543,0.068081,0.067845,0.064464,0.06898  
2,0.067478,0.068966,0.069415,0.072456,0.14134,0.13349,0.12819,0.1391,0  
.13093,0.11899,0.14861,0.12702,0.16202,0.13465,0.1251,0.12687,0.13857,  
0.065809,0.065236,0.065721,0.067195,0.065603,0.072374,0.066107,0.07238  
6,0.069062,0.071847,0.070533,0.067055,0.07044,0.069231,0.06924,0.07049  
4,0.071696,0.072069,0.06795,0.070925,0.068348,0.13436,0.13029,0.13107,  
0.13943,0.13211,0.13697,0.13559,0.1348,0.14236,0.063819,0.07061,0.0736  
19,0.071479,0.070485,0.061681,0.070518,0.073717,0.070878,0.071234,0.06  
7217,0.070278,0.069152,0.068595,0.067394,0.070368,0.071482,0.070382,0.  
06474,0.065141,0.068449,0.066242,0.067132,0.070799,0.070266,0.13032,0.  
13374,0.13533,0.12917,0.071451,0.063288,0.060132,0.07026,0.064561,0.06  
2387,0.072391,0.067883,0.072892,0.063095,0.066966,0.070229,0.067446,0.  
070941,0.073853,0.064275,0.064656,0.069961,0.068582,0.069893,0.068447,  
0.064839,0.066419,0.067805,0.065271,0.069066,0.07237,0.065987,0.071011  
,0.063378,0.069473,0.063746,0.069423,0.068856,0.063044,0.068479,0.0674  
64,0.067655,0.06944,0.070119,0.068886,0.07109,0.067553,0.062479,0.0690  
09,0.067409,0.067163,0.067145,0.067901,0.068637,0.06192,0.070887,0.072  
89,0.065521,0.068527,0.072121,0.06642,0.069208,0.064414,0.066039,0.070  
853,0.066041,0.067666,0.065974,0.074514,0.071234,0.073336,0.069958,0.0  
69152,0.064582,0.068248,0.068945,0.071189,0.068095,0.071906,0.066259,0  
.066739,0.067461,0.066483,0.065723,0.067963,0.067625,0.071453,0.065843  
,0.071221,0.067984,0.071177,0.074834,0.068462,0.068584,0.067322,0.0648  
07,0.068487,0.072377,0.067845,0.071588,0.067126,0.066704,0.059339,0.06  
9722,0.063694,0.070691,0.073919,0.067065,0.068359,0.064787,0.067514,0.

073206,0.074517,0.062432,0.068217,0.069335,0.067981,0.070837,0.069736,  
0.065454,0.068189,0.066487,0.069254,0.066401,0.067982,0.066689,0.07228  
3,0.071091,0.072292,0.066964,0.065517,0.07224,0.064186,0.071694,0.0688  
88,0.070065,0.073391,0.071609,0.067298,0.06448,0.068059,0.065893,0.070  
328,0.068918,0.070494,0.063289,0.075213,0.066988,0.063301,0.066349,0.0  
68676,0.064723,0.064859,0.068798,0.067899,0.068143,0.071271,0.070953,0  
.069064,0.068816,0.067288,0.066469,0.070848,0.064021,0.067947,0.068173  
,0.069017,0.07,0.068258,0.066507,0.067635,0.069153,0.071432,0.063751,0  
.067537,0.066049,0.068473,0.063421,0.062763,0.067206,0.07407,0.068051,  
0.069158,0.06566,0.066383,0.069568,0.071762,0.06959,0.072714,0.067222,  
0.065599,0.066013,0.064544,0.064657,0.069073,0.071877,0.068142,0.06593  
7,0.06271  
0.19996,0.18738,0.2002,0.20565,0.1962,0.1995,0.1988,0.19359,0.20381,0.  
19945,0.19345,0.20462,0.19729,0.19135,0.18923,0.19911,0.2053,0.20218,0  
.19406,0.19557,0.2647,0.33855,0.33906,0.28908,0.19755,0.20343,0.20035,  
0.20538,0.20247,0.18919,0.19476,0.20207,0.20656,0.20087,0.19949,0.2029  
,0.19622,0.19409,0.1923,0.36753,0.28911,0.26263,0.30342,0.28423,0.2716  
7,0.26927,0.19743,0.19805,0.19753,0.19316,0.19453,0.21038,0.2031,0.205  
83,0.19189,0.20108,0.19212,0.20857,0.20536,0.1903,0.19154,0.5025,0.325  
84,0.24854,0.2971,0.3224,0.31135,0.29753,0.26618,0.25387,0.31289,0.206  
68,0.19374,0.19857,0.19516,0.1994,0.19608,0.198,0.20384,0.19499,0.1858  
2,0.19564,0.19675,0.19815,0.19914,0.20715,0.33198,0.36216,0.34204,0.24  
754,0.3018,0.27312,0.27928,0.24603,0.24637,0.26736,0.32593,0.30788,0.2  
0345,0.20695,0.1959,0.19543,0.19587,0.20521,0.20997,0.2023,0.1981,0.20  
207,0.19483,0.1983,0.19585,0.20591,0.20337,0.19245,0.44348,0.28471,0.4  
5195,0.37334,0.31153,0.25998,0.309,0.32253,0.27628,0.22774,0.2846,0.29  
778,0.30921,0.26339,0.20182,0.20251,0.19692,0.19827,0.20109,0.20022,0.  
20331,0.18862,0.2091,0.19847,0.20114,0.2044,0.19474,0.1983,0.19802,0.1  
9456,0.47084,0.34452,0.42138,0.37343,0.3627,0.39519,0.34598,0.31851,0.  
29219,0.33082,0.27623,0.31402,0.28272,0.25367,0.2924,0.29624,0.1922,0.  
20667,0.20009,0.20039,0.19942,0.18417,0.19627,0.19537,0.20686,0.20231,  
0.19118,0.19583,0.20885,0.1984,0.19777,0.20067,0.20321,0.44886,0.42284  
,0.4243,0.29279,0.18684,0.35621,0.28554,0.25421,0.22746,0.30031,0.2716  
7,0.26588,0.30545,0.29234,0.24851,0.32328,0.3001,0.18859,0.20264,0.201  
91,0.19826,0.19586,0.1968,0.1909,0.19677,0.19025,0.18875,0.20053,0.199  
46,0.2035,0.133,0.15543,0.12871,0.19775,0.35445,0.42463,0.38962,0.4115  
8,0.34088,0.33102,0.28612,0.27468,0.31443,0.33039,0.30635,0.28972,0.29  
237,0.29483,0.31182,0.3164,0.29556,0.28309,0.19145,0.19939,0.19143,0.1  
9371,0.20322,0.19666,0.2039,0.19536,0.20556,0.19698,0.19811,0.12657,0.  
12909,0.13846,0.13187,0.12642,0.13494,0.1998,0.35655,0.45617,0.38836,0  
.35617,0.42023,0.37649,0.37681,0.32073,0.36863,0.32098,0.27275,0.29473  
,0.26117,0.26182,0.22551,0.26612,0.27271,0.31826,0.19722,0.21527,0.199  
97,0.19333,0.18551,0.19887,0.20493,0.20094,0.20629,0.13369,0.11869,0.1  
4526,0.14733,0.13602,0.12821,0.12775,0.12173,0.12693,0.19669,0.3658,0.  
41085,0.34825,0.43463,0.28863,0.36884,0.31538,0.25825,0.25886,0.29439,  
0.31288,0.29706,0.32316,0.26353,0.29787,0.34878,0.27006,0.29733,0.2540  
7,0.2002,0.20655,0.20293,0.19332,0.20016,0.21023,0.12722,0.13573,0.131  
35,0.11992,0.13242,0.13344,0.12674,0.12116,0.121,0.12914,0.13143,0.153  
21,0.51824,0.37413,0.38788,0.40077,0.37545,0.3919,0.31943,0.23829,0.30  
446,0.26532,0.32241,0.2712,0.25243,0.30224,0.26399,0.25314,0.30043,0.2  
6423,0.29903,0.19686,0.20528,0.20087,0.13971,0.13725,0.14076,0.13402,0  
.12651,0.12111,0.12966,0.1425,0.13244,0.13699,0.1274,0.1332,0.12956,0.

15064,0.12635,0.4267,0.35843,0.42925,0.39278,0.37158,0.41901,0.37944,0.  
.3784,0.29938,0.30193,0.30805,0.2712,0.29462,0.31256,0.30483,0.32987,0.  
.24686,0.30472,0.31927,0.27121,0.13138,0.1328,0.135,0.13625,0.13086,0.  
14194,0.13323,0.13328,0.14243,0.134,0.12659,0.14737,0.11464,0.12234,0.  
13262,0.1376,0.11895,0.12926,0.34934,0.40659,0.35425,0.34197,0.35809,0.  
.37924,0.37678,0.38838,0.33065,0.27435,0.21645,0.23442,0.21057,0.21271  
,0.25978,0.22587,0.22046,0.21413,0.24616,0.19419,0.1288,0.13394,0.1316  
2,0.14056,0.13433,0.13026,0.13212,0.12824,0.12546,0.13421,0.15305,0.13  
306,0.1217,0.13195,0.13232,0.14742,0.13133,0.1366,0.5686,0.31642,0.394  
42,0.31996,0.38942,0.24799,0.36234,0.33954,0.29764,0.23415,0.19273,0.2  
2014,0.21422,0.20274,0.20085,0.21704,0.21788,0.25213,0.19947,0.23078,0.  
.1256,0.14326,0.14686,0.12643,0.12998,0.13619,0.13401,0.13307,0.12703,  
0.12615,0.16308,0.12192,0.13394,0.11199,0.13712,0.1448,0.12677,0.12622  
,0.40776,0.42613,0.28334,0.31007,0.58642,0.36345,0.29786,0.16849,0.225  
93,0.19501,0.2306,0.21721,0.2067,0.23665,0.20961,0.20556,0.20698,0.194  
31,0.1815,0.22696,0.10756,0.13756,0.12556,0.13979,0.13146,0.14391,0.13  
103,0.1374,0.13339,0.12401,0.12577,0.12969,0.13558,0.13644,0.13131,0.1  
3384,0.13513,0.11939,0.34611,0.42016,0.34618,0.3044,0.32914,0.3262,0.1  
9164,0.23509,0.21009,0.20696,0.19748,0.25413,0.218,0.2195,0.23405,0.20  
01,0.22153,0.22077,0.1788,0.20534,0.14065,0.13059,0.11824,0.14728,0.13  
241,0.13035,0.13365,0.12472,0.12268,0.13147,0.13916,0.11937,0.14356,0.  
14503,0.12509,0.12645,0.13787,0.13946,0.36204,0.40294,0.36074,0.36212,  
0.43974,0.25805,0.19649,0.20885,0.33843,0.20554,0.22489,0.20226,0.1943  
3,0.22151,0.19385,0.18665,0.19948,0.20369,0.23323,0.24377,0.13056,0.13  
275,0.1359,0.1457,0.14427,0.13191,0.14518,0.13042,0.13244,0.12843,0.13  
639,0.14955,0.12099,0.12851,0.13123,0.12142,0.13107,0.13287,0.35057,0.  
26956,0.393,0.28813,0.21628,0.20004,0.23131,0.21398,0.19299,0.22674,0.  
20921,0.19216,0.1707,0.24289,0.21375,0.18769,0.22326,0.20997,0.26706,0.  
.24854,0.12106,0.12876,0.12834,0.13089,0.12417,0.13322,0.13489,0.14659  
,0.13938,0.12218,0.1287,0.13691,0.12946,0.12912,0.12318,0.14498,0.1380  
5,0.13566,0.39766,0.26121,0.25783,0.21394,0.26392,0.22114,0.19261,0.25  
368,0.17777,0.2482,0.19269,0.2085,0.26878,0.21945,0.19679,0.20379,0.21  
209,0.21153,0.20524,0.1364,0.13128,0.13376,0.12905,0.12816,0.14323,0.1  
3005,0.1362,0.14065,0.13633,0.16082,0.12583,0.14421,0.13363,0.13002,0.  
1431,0.13671,0.06303,0.22812,0.1888,0.21519,0.24909,0.29341,0.25076,0.  
16325,0.19208,0.17462,0.19704,0.21669,0.2258,0.22241,0.25025,0.21739,0.  
.18238,0.22243,0.20099,0.21319,0.13983,0.13545,0.12945,0.14103,0.13073  
,0.13464,0.13477,0.1324,0.12578,0.12442,0.14121,0.13623,0.12763,0.1363  
3,0.13387,0.12701,0.13249,0.062044,0.20374,0.22971,0.2175,0.19332,0.25  
411,0.19073,0.24998,0.21662,0.2511,0.18668,0.23064,0.20226,0.2298,0.18  
626,0.18331,0.25605,0.18553,0.21593,0.12808,0.12984,0.12778,0.12646,0.  
11486,0.13488,0.12791,0.1249,0.12727,0.13762,0.14603,0.14169,0.13119,0.  
.13243,0.13085,0.12939,0.12951,0.12675,0.06138,0.25229,0.27547,0.22112  
,0.2027,0.24912,0.21261,0.27712,0.14911,0.17078,0.24697,0.19864,0.1908  
5,0.21436,0.21384,0.2322,0.24107,0.24964,0.20909,0.13206,0.12062,0.137  
73,0.12156,0.12944,0.13039,0.13069,0.13384,0.16178,0.12994,0.13075,0.1  
2389,0.13143,0.12985,0.12235,0.14089,0.14379,0.064304,0.066458,0.06569  
,0.18754,0.25489,0.23936,0.21674,0.22639,0.10947,0.21168,0.22689,0.177  
82,0.18178,0.20398,0.21392,0.23079,0.21914,0.20859,0.11548,0.13029,0.1  
2901,0.1284,0.13116,0.13364,0.13622,0.11756,0.12957,0.1243,0.11609,0.1  
4874,0.1399,0.13559,0.12739,0.13291,0.12659,0.13131,0.064054,0.066958,  
0.065379,0.065344,0.19367,0.26073,0.26681,0.26846,0.2308,0.23879,0.243

65,0.24498,0.23786,0.21141,0.18638,0.23153,0.13297,0.13007,0.1756,0.13045,0.13934,0.13616,0.12478,0.12907,0.12667,0.1253,0.14362,0.13621,0.12973,0.12189,0.14767,0.13025,0.12677,0.13843,0.13165,0.11992,0.064589,0.062576,0.063369,0.061245,0.064363,0.067524,0.18254,0.16732,0.19507,0.21352,0.1979,0.21035,0.2066,0.22302,0.13921,0.13359,0.13585,0.13232,0.13589,0.14699,0.13836,0.13352,0.13651,0.12413,0.1386,0.11298,0.14612,0.11551,0.13634,0.12805,0.15155,0.13726,0.13017,0.13093,0.13042,0.13828,0.10857,0.066126,0.065717,0.070083,0.065882,0.064379,0.059692,0.20258,0.19082,0.28843,0.15949,0.22319,0.065091,0.064437,0.13605,0.1199,0.12631,0.13783,0.1203,0.13834,0.11448,0.12486,0.13775,0.13117,0.12906,0.13435,0.13208,0.12868,0.1312,0.13145,0.13684,0.14294,0.13516,0.12796,0.11004,0.061544,0.061948,0.064804,0.06858,0.063023,0.060641,0.065047,0.06256,0.061623,0.064892,0.21067,0.21598,0.067583,0.060266,0.06559,0.062508,0.13786,0.12427,0.13717,0.13018,0.15322,0.14544,0.14873,0.13571,0.13399,0.12474,0.1209,0.13686,0.13079,0.13182,0.12238,0.1127,0.13809,0.13375,0.13439,0.062026,0.063126,0.066049,0.066128,0.067749,0.063169,0.062634,0.062902,0.061491,0.06436,0.065034,0.066157,0.070103,0.062875,0.064916,0.063122,0.067053,0.15179,0.14031,0.12635,0.13549,0.12329,0.1341,0.12882,0.12853,0.11931,0.1243,0.1355,0.12771,0.13155,0.13569,0.1315,0.13078,0.068604,0.067978,0.069294,0.063863,0.064325,0.061684,0.066537,0.062813,0.061237,0.065449,0.061447,0.063882,0.063174,0.059484,0.064978,0.061834,0.065266,0.065416,0.069053,0.14057,0.1353,0.12534,0.13907,0.13074,0.11839,0.1445,0.12421,0.16067,0.1347,0.12399,0.12537,0.14059,0.0627,0.061742,0.063055,0.063487,0.064341,0.067543,0.062009,0.066799,0.065011,0.068034,0.066456,0.062177,0.065143,0.06408,0.066198,0.066551,0.065114,0.066699,0.064523,0.064551,0.062461,0.13663,0.13223,0.13072,0.1339,0.13144,0.13328,0.13421,0.1325,0.1451,0.061553,0.068573,0.070461,0.066388,0.068166,0.056259,0.065537,0.068981,0.067028,0.06579,0.063681,0.068719,0.063374,0.06312,0.064904,0.063767,0.067023,0.064607,0.059508,0.06248,0.066292,0.063001,0.062792,0.066048,0.06681,0.12866,0.13205,0.13414,0.12726,0.065769,0.060219,0.05617,0.067128,0.062007,0.059819,0.068627,0.061477,0.069825,0.058556,0.064543,0.065864,0.06469,0.065503,0.069529,0.061793,0.061448,0.065897,0.06437,0.067548,0.064775,0.060476,0.060956,0.066777,0.061278,0.066529,0.067675,0.060216,0.065825,0.061719,0.067983,0.060577,0.067035,0.065217,0.059599,0.066817,0.064612,0.062885,0.064764,0.064745,0.0635,0.066964,0.063531,0.05807,0.066162,0.064168,0.065359,0.063452,0.062419,0.065687,0.058619,0.066355,0.068418,0.059315,0.065647,0.068576,0.065028,0.06573,0.062963,0.062688,0.066497,0.063875,0.060753,0.063168,0.071214,0.067713,0.067904,0.065654,0.065813,0.061254,0.063358,0.066182,0.067209,0.062369,0.068204,0.062445,0.062715,0.063742,0.062774,0.060121,0.064955,0.063363,0.067957,0.062215,0.065914,0.063013,0.066748,0.069289,0.064593,0.06398,0.064353,0.06329,0.06607,0.067121,0.062961,0.065327,0.063521,0.061254,0.056048,0.064304,0.059119,0.067936,0.069602,0.063793,0.066491,0.059291,0.064428,0.069016,0.071644,0.060253,0.063324,0.065637,0.061749,0.066396,0.068747,0.063325,0.064871,0.062959,0.065657,0.061973,0.066005,0.064769,0.064988,0.065668,0.070065,0.063534,0.061204,0.067864,0.059104,0.0663,0.065294,0.064631,0.06885,0.067914,0.064795,0.062181,0.066459,0.06324,0.065149,0.063549,0.068357,0.061127,0.070017,0.063462,0.060127,0.061356,0.064238,0.060407,0.06048,0.064577,0.063234,0.066369,0.068052,0.064912,0.065112,0.065124,0.063941,0.064227,0.065876,0.060151,0.062895,0.063268,0.062081,0.067178,0.065295,0.062867,0.06389,0.066606,0.066596,0.060691,0.06

4562,0.064557,0.06312,0.06108,0.058686,0.064798,0.069119,0.06409,0.065  
935,0.063678,0.062768,0.064813,0.066509,0.066214,0.070659,0.061966,0.0  
62129,0.062723,0.06035,0.06178,0.065245,0.069404,0.064061,0.062919,0.0  
56714  
0.20432,0.18883,0.20256,0.20034,0.19564,0.20015,0.1989,0.1968,0.20439,  
0.2012,0.19779,0.20809,0.19944,0.19177,0.18793,0.20305,0.20589,0.20521  
,0.1978,0.19868,0.28289,0.34534,0.34859,0.29157,0.19791,0.20591,0.2005  
8,0.20538,0.20194,0.19278,0.19551,0.20254,0.20657,0.2041,0.20339,0.202  
85,0.19955,0.19317,0.19447,0.37275,0.30646,0.25423,0.30492,0.29683,0.2  
5856,0.27303,0.19849,0.19845,0.20241,0.19626,0.19471,0.21477,0.203,0.2  
0723,0.19769,0.2025,0.19361,0.21109,0.2067,0.18803,0.19252,0.52204,0.2  
8995,0.26016,0.31854,0.30841,0.30066,0.30667,0.28816,0.24478,0.30034,0  
.20495,0.19752,0.20353,0.19367,0.20267,0.19648,0.19534,0.19979,0.19808  
,0.1876,0.19774,0.19473,0.20085,0.20355,0.20694,0.34965,0.35367,0.3151  
8,0.26011,0.28513,0.25958,0.27772,0.24006,0.23344,0.27216,0.29177,0.29  
584,0.2011,0.20996,0.19384,0.19745,0.19292,0.20838,0.20836,0.20433,0.2  
0049,0.20605,0.19685,0.19835,0.19617,0.20135,0.20366,0.19593,0.44647,0  
.2966,0.47795,0.38467,0.29222,0.26315,0.30322,0.3232,0.28227,0.23355,0  
.28057,0.29343,0.31414,0.25693,0.20507,0.20317,0.1994,0.19815,0.20032,  
0.20192,0.20525,0.18987,0.20658,0.19612,0.20397,0.20355,0.19855,0.2022  
8,0.19934,0.19398,0.46345,0.33009,0.40007,0.33735,0.39865,0.4295,0.344  
18,0.30505,0.28695,0.31456,0.27395,0.32713,0.2879,0.24331,0.27452,0.31  
613,0.19724,0.20331,0.20161,0.19891,0.20044,0.183,0.19482,0.19841,0.20  
449,0.20493,0.19285,0.20083,0.21109,0.20077,0.19883,0.19998,0.20485,0.  
4141,0.42478,0.38963,0.27343,0.21858,0.31235,0.27978,0.26542,0.2352,0.  
31289,0.27593,0.27063,0.30697,0.31221,0.23846,0.31795,0.29012,0.19123,  
0.20597,0.20519,0.19771,0.19933,0.199,0.18947,0.1922,0.19408,0.19121,0  
.20121,0.20234,0.20107,0.13269,0.15363,0.12856,0.20529,0.30671,0.43458  
,0.38194,0.40151,0.34403,0.33891,0.29315,0.26743,0.31618,0.33669,0.306  
98,0.29006,0.28886,0.2883,0.30584,0.31325,0.27828,0.28307,0.18995,0.20  
203,0.19165,0.19625,0.20664,0.19499,0.20566,0.19719,0.20293,0.19782,0.  
19484,0.12267,0.13073,0.13696,0.13133,0.1249,0.13624,0.19924,0.38491,0  
.45119,0.36939,0.37298,0.41354,0.38767,0.37907,0.33748,0.3549,0.3236,0  
.27861,0.30649,0.27416,0.27847,0.22852,0.25973,0.26324,0.27625,0.20099  
,0.21006,0.19821,0.19724,0.18356,0.20539,0.2091,0.20467,0.20508,0.1322  
,0.11607,0.14324,0.14684,0.13773,0.12387,0.12652,0.12006,0.12741,0.199  
54,0.32531,0.38807,0.37014,0.42851,0.25798,0.3332,0.30515,0.24838,0.23  
036,0.29818,0.33051,0.28304,0.32858,0.25908,0.30591,0.33951,0.26971,0.  
29801,0.26372,0.19961,0.20388,0.20149,0.19132,0.19894,0.21043,0.12567,  
0.13402,0.13168,0.11862,0.13036,0.13125,0.12581,0.12193,0.11844,0.1270  
4,0.13023,0.15303,0.47398,0.33929,0.37139,0.39772,0.3621,0.36568,0.301  
83,0.24442,0.34823,0.25984,0.31685,0.26816,0.25243,0.29352,0.25826,0.2  
6045,0.30244,0.27151,0.30078,0.19929,0.2022,0.20028,0.13802,0.13474,0.  
14093,0.13393,0.1268,0.12047,0.13103,0.14383,0.13318,0.13488,0.1279,0.  
1323,0.12884,0.14922,0.12326,0.42042,0.35042,0.42238,0.36429,0.36709,0  
.42246,0.39846,0.39733,0.32375,0.29609,0.29879,0.26799,0.31538,0.31558  
,0.30784,0.33047,0.28078,0.32577,0.3217,0.24397,0.13015,0.13015,0.1342  
6,0.13489,0.13014,0.13888,0.13211,0.13224,0.14206,0.1339,0.12684,0.147  
47,0.11137,0.12165,0.13299,0.13483,0.1224,0.1273,0.35854,0.43899,0.361  
82,0.33673,0.36317,0.35129,0.34367,0.35199,0.32451,0.25976,0.24582,0.2  
2,0.20588,0.21241,0.25509,0.21267,0.21728,0.21398,0.24563,0.20168,0.12  
679,0.13403,0.1302,0.13619,0.13292,0.13227,0.13397,0.13025,0.12264,0.1

3295,0.1506,0.1308,0.12474,0.13031,0.13286,0.14764,0.13232,0.13349,0.5  
7343,0.31729,0.41641,0.3214,0.36536,0.22809,0.34396,0.32945,0.31247,0.  
21019,0.19547,0.2118,0.20743,0.19318,0.20173,0.2177,0.21135,0.25552,0.  
20022,0.22205,0.12588,0.14097,0.14953,0.12619,0.13009,0.13429,0.13431,  
0.13293,0.12644,0.12561,0.16852,0.11935,0.13353,0.10946,0.13604,0.143,  
0.12627,0.12757,0.37355,0.42065,0.23939,0.31171,0.51388,0.37861,0.2772  
,0.15613,0.21726,0.21287,0.21543,0.20875,0.20879,0.24101,0.20369,0.205  
74,0.20384,0.20953,0.18709,0.21997,0.1043,0.13762,0.12448,0.13965,0.13  
085,0.14281,0.13258,0.13483,0.13178,0.12458,0.12555,0.13004,0.13473,0.  
13492,0.12967,0.13255,0.13624,0.11995,0.31412,0.42506,0.33777,0.30604,  
0.32754,0.33341,0.18672,0.21762,0.18679,0.19501,0.21799,0.24045,0.2135  
5,0.22438,0.21965,0.20172,0.20933,0.20931,0.18451,0.19153,0.13837,0.12  
684,0.11953,0.14541,0.13195,0.13005,0.13456,0.12621,0.12345,0.13032,0.  
13745,0.12108,0.14148,0.14562,0.12513,0.12394,0.1358,0.1391,0.36366,0.  
39419,0.33778,0.35033,0.41841,0.2627,0.18796,0.21766,0.35505,0.2034,0.  
22661,0.19527,0.19013,0.21983,0.20117,0.18336,0.19907,0.20589,0.23403,  
0.2396,0.13026,0.13554,0.13492,0.14609,0.14614,0.13192,0.14574,0.12811  
,0.13173,0.12793,0.13084,0.14688,0.11835,0.12477,0.12902,0.12109,0.127  
7,0.13199,0.36129,0.30381,0.38108,0.29052,0.19844,0.19691,0.22544,0.19  
859,0.20833,0.24437,0.20187,0.18523,0.17233,0.234,0.2144,0.1772,0.2271  
4,0.19983,0.26532,0.23835,0.11996,0.12849,0.12671,0.13131,0.12167,0.13  
1,0.13158,0.14847,0.13782,0.11899,0.12845,0.13408,0.1295,0.12742,0.121  
48,0.14591,0.13323,0.1346,0.42113,0.24879,0.24253,0.2138,0.27364,0.217  
62,0.18363,0.27987,0.19414,0.24776,0.17345,0.20607,0.26939,0.21173,0.1  
9398,0.20362,0.20769,0.21365,0.19988,0.13239,0.13017,0.13345,0.12774,0  
.12983,0.14229,0.12769,0.13627,0.1395,0.13724,0.16387,0.1236,0.14398,0  
.13279,0.13131,0.14321,0.13455,0.061594,0.22378,0.1697,0.22567,0.25511  
,0.30336,0.22532,0.16024,0.19482,0.18251,0.18235,0.20422,0.23757,0.219  
88,0.24685,0.21192,0.185,0.21119,0.19538,0.22454,0.13598,0.13557,0.129  
,0.1413,0.12872,0.13258,0.13336,0.13115,0.12675,0.12099,0.13796,0.1358  
9,0.12652,0.13662,0.1324,0.12726,0.13183,0.060025,0.20682,0.20934,0.21  
747,0.20095,0.28832,0.20226,0.22363,0.20115,0.22987,0.17639,0.21628,0.  
20424,0.23108,0.18798,0.1824,0.24863,0.18472,0.21951,0.1256,0.13275,0.  
12753,0.12466,0.11385,0.13158,0.12448,0.12329,0.12672,0.13583,0.14601,  
0.14007,0.12848,0.13115,0.13069,0.12821,0.12809,0.12453,0.057666,0.248  
31,0.28166,0.22673,0.18919,0.24087,0.20535,0.26441,0.14925,0.17379,0.2  
3704,0.18432,0.19189,0.22162,0.22664,0.23573,0.25407,0.24625,0.20701,0  
.12788,0.12081,0.1358,0.12105,0.12948,0.13095,0.12924,0.13127,0.16479,  
0.13059,0.12996,0.12192,0.12823,0.12754,0.12224,0.14186,0.14391,0.0610  
43,0.061013,0.062291,0.1773,0.23714,0.23513,0.2026,0.22439,0.10694,0.2  
1277,0.23174,0.16457,0.18158,0.20141,0.20858,0.2213,0.21353,0.21149,0.  
11566,0.1326,0.12931,0.12838,0.13069,0.13412,0.13442,0.11416,0.12689,0  
.12266,0.11727,0.15144,0.13944,0.13232,0.1266,0.13062,0.125,0.12847,0.  
059374,0.063764,0.063932,0.061877,0.19073,0.24951,0.26279,0.26102,0.21  
059,0.24196,0.23995,0.23289,0.2394,0.22368,0.1924,0.2256,0.13307,0.129  
5,0.17591,0.12949,0.14107,0.13285,0.12401,0.13109,0.12708,0.12295,0.14  
357,0.13831,0.12784,0.12292,0.14538,0.13213,0.12465,0.13895,0.13108,0.  
12002,0.061039,0.059365,0.059749,0.057593,0.062117,0.062996,0.18476,0.  
15616,0.18839,0.19628,0.21448,0.20624,0.19668,0.22329,0.13857,0.13089,  
0.13544,0.13124,0.133,0.14419,0.13725,0.13065,0.13248,0.12424,0.13958,  
0.10959,0.14385,0.11377,0.13465,0.12733,0.15271,0.13751,0.13095,0.1314  
,0.1291,0.13877,0.10791,0.065073,0.062326,0.066005,0.062397,0.062482,0

.056065,0.18035,0.20755,0.2785,0.15499,0.22122,0.061829,0.061833,0.13539,0.11865,0.12268,0.1356,0.11974,0.13497,0.11398,0.12204,0.1377,0.13088,0.12845,0.13426,0.1302,0.12579,0.13149,0.12956,0.13509,0.14042,0.13629,0.12638,0.1105,0.058133,0.059268,0.06171,0.067104,0.059066,0.057108,0.062862,0.05932,0.058739,0.063478,0.16905,0.21421,0.06267,0.058343,0.063226,0.059626,0.13767,0.12204,0.13569,0.13171,0.15551,0.14627,0.14922,0.13309,0.13198,0.12453,0.11996,0.13468,0.13243,0.13114,0.12047,0.11015,0.13609,0.13463,0.13297,0.05932,0.058333,0.060865,0.065227,0.06449,0.060458,0.060497,0.060647,0.05604,0.060025,0.06034,0.061763,0.066926,0.059537,0.062671,0.059452,0.063389,0.1519,0.14048,0.12532,0.13511,0.12254,0.13327,0.12797,0.12817,0.11862,0.12228,0.13263,0.1287,0.13167,0.13503,0.12804,0.13018,0.065898,0.063323,0.067817,0.062541,0.062013,0.057846,0.06286,0.06172,0.059562,0.062543,0.057632,0.059486,0.060254,0.05624,0.063894,0.059636,0.062463,0.064416,0.064442,0.1417,0.13412,0.12629,0.13834,0.1273,0.11741,0.14142,0.12316,0.16477,0.13223,0.12398,0.12244,0.14038,0.058877,0.058132,0.060537,0.060366,0.0609,0.062214,0.057761,0.065471,0.061395,0.065426,0.059561,0.060276,0.063214,0.060712,0.059818,0.061567,0.060578,0.062728,0.062339,0.059796,0.058914,0.13423,0.1291,0.12966,0.13562,0.13075,0.13125,0.13391,0.13088,0.14806,0.059512,0.065195,0.067933,0.064462,0.065584,0.052497,0.062598,0.067463,0.065153,0.061456,0.06203,0.065773,0.060835,0.061253,0.062512,0.060105,0.06425,0.062048,0.055314,0.060033,0.062421,0.061563,0.058208,0.064263,0.066989,0.1263,0.13409,0.13246,0.12627,0.062135,0.05735,0.05341,0.064072,0.058479,0.058611,0.065571,0.055962,0.064884,0.056044,0.060603,0.062368,0.061318,0.06208,0.066229,0.059066,0.058246,0.063854,0.061101,0.065367,0.06036,0.055173,0.057488,0.065315,0.058396,0.063237,0.06387,0.057362,0.064308,0.05815,0.0642,0.05696,0.063048,0.062398,0.055976,0.063195,0.061382,0.059053,0.063103,0.06344,0.060285,0.063463,0.0607,0.056792,0.062564,0.063076,0.059393,0.061051,0.058304,0.06181,0.055048,0.062911,0.064442,0.05676,0.06247,0.065676,0.062528,0.063164,0.059097,0.060495,0.065474,0.062296,0.058101,0.058822,0.067049,0.064749,0.063593,0.063695,0.060575,0.059605,0.060378,0.064388,0.064512,0.059035,0.063804,0.059626,0.058936,0.06057,0.058329,0.057692,0.061833,0.058743,0.065054,0.060571,0.059754,0.059158,0.062739,0.064746,0.063171,0.06399,0.06135,0.059646,0.063549,0.064467,0.061142,0.060267,0.060876,0.058658,0.055549,0.058843,0.054076,0.065188,0.065825,0.05935,0.06298,0.057897,0.062677,0.064828,0.068267,0.057741,0.059323,0.061654,0.059581,0.0645,0.065199,0.058452,0.060575,0.058248,0.06219,0.058507,0.063477,0.059531,0.061713,0.062515,0.067676,0.060751,0.057927,0.0672,0.05547,0.062822,0.064622,0.06096,0.065875,0.062948,0.062217,0.059908,0.064508,0.059756,0.061623,0.059645,0.063702,0.057667,0.067796,0.061198,0.057991,0.060817,0.05939,0.057376,0.057441,0.061591,0.059881,0.065312,0.063932,0.062623,0.06309,0.060673,0.060373,0.060653,0.062867,0.054818,0.058121,0.060138,0.05814,0.064222,0.06373,0.06227,0.062011,0.063459,0.063733,0.059453,0.061637,0.060963,0.060182,0.059024,0.055871,0.06297,0.065006,0.060721,0.060899,0.061322,0.060986,0.061289,0.060244,0.061701,0.065138,0.058739,0.060481,0.058892,0.05574,0.05955,0.062105,0.065874,0.062196,0.061215,0.054365

0.20901,0.18688,0.20691,0.20045,0.19798,0.20036,0.20122,0.1934,0.20459,0.19801,0.19827,0.20568,0.19829,0.19704,0.18874,0.20075,0.21241,0.20143,0.19643,0.20086,0.3039,0.33778,0.35123,0.30593,0.19687,0.20722,0.19942,0.20574,0.20154,0.19521,0.19881,0.20363,0.20636,0.20605,0.2044,0.2

0286,0.2002,0.19428,0.19512,0.37901,0.31111,0.24945,0.29264,0.27437,0.25303,0.27841,0.20225,0.19608,0.20484,0.19658,0.19409,0.2174,0.20355,0.20509,0.19903,0.20568,0.19926,0.21182,0.20292,0.19273,0.194,0.4836,0.31069,0.24868,0.31346,0.30234,0.31126,0.2856,0.28142,0.2419,0.29744,0.20135,0.1964,0.20562,0.19096,0.20327,0.20256,0.19649,0.20016,0.20027,0.18962,0.20062,0.19488,0.20073,0.20364,0.20801,0.35741,0.35101,0.32467,0.26547,0.26834,0.26022,0.26863,0.2494,0.25125,0.28167,0.27283,0.28144,0.20781,0.21113,0.19289,0.2012,0.19531,0.21175,0.21373,0.20803,0.20081,0.20873,0.19397,0.19972,0.2004,0.19736,0.20292,0.19718,0.42047,0.32259,0.46123,0.38104,0.29864,0.26956,0.30455,0.32768,0.29143,0.23772,0.27886,0.28418,0.30264,0.26521,0.21113,0.20439,0.20074,0.20067,0.19911,0.19834,0.20921,0.1864,0.20847,0.19885,0.20496,0.20579,0.19708,0.20216,0.20074,0.19656,0.38484,0.32894,0.41479,0.3235,0.40734,0.40272,0.32304,0.30259,0.29492,0.31408,0.27642,0.34229,0.29614,0.25704,0.26136,0.32943,0.20207,0.20334,0.20397,0.19675,0.20283,0.18185,0.19769,0.20054,0.20424,0.20905,0.19928,0.20391,0.21016,0.20097,0.19717,0.202,0.20868,0.36898,0.41079,0.37194,0.23775,0.26359,0.3403,0.27984,0.27055,0.24072,0.29935,0.26806,0.26225,0.30985,0.31074,0.21345,0.30179,0.29351,0.19693,0.20136,0.20577,0.19718,0.19884,0.19902,0.18818,0.19351,0.19183,0.19029,0.20076,0.20101,0.2002,0.13227,0.15114,0.12792,0.20664,0.33167,0.42471,0.35659,0.35392,0.30873,0.3543,0.27802,0.26309,0.31033,0.34238,0.30671,0.29467,0.28754,0.29451,0.29811,0.32276,0.28135,0.28959,0.19625,0.20683,0.19724,0.19896,0.20545,0.1926,0.20686,0.19654,0.207,0.20159,0.19348,0.12032,0.1312,0.13499,0.12898,0.12347,0.13192,0.19954,0.40028,0.44731,0.37656,0.36351,0.43667,0.38673,0.37575,0.32388,0.34916,0.29674,0.26185,0.29508,0.274,0.29077,0.2311,0.27012,0.25757,0.28206,0.20397,0.21202,0.19794,0.19911,0.1903,0.20334,0.20851,0.20466,0.20721,0.13379,0.11613,0.14177,0.14947,0.13485,0.12512,0.12331,0.12065,0.12887,0.19726,0.30108,0.3479,0.42003,0.44228,0.2619,0.38814,0.35879,0.25791,0.23842,0.29968,0.30655,0.26341,0.33276,0.27646,0.33946,0.34055,0.27645,0.30648,0.24892,0.19997,0.20517,0.19944,0.19212,0.2031,0.21192,0.12566,0.13447,0.13025,0.11875,0.12849,0.12956,0.12592,0.11951,0.1172,0.12762,0.1299,0.15412,0.39881,0.31957,0.37704,0.38296,0.33125,0.34506,0.29793,0.24723,0.33622,0.25203,0.29834,0.27513,0.25557,0.29605,0.25903,0.24658,0.29958,0.27313,0.30617,0.20032,0.20538,0.20119,0.13879,0.13708,0.14112,0.13686,0.1263,0.12064,0.13076,0.14407,0.13121,0.13171,0.12745,0.13131,0.12708,0.14942,0.1215,0.42255,0.32388,0.41057,0.35336,0.3642,0.42192,0.32764,0.38501,0.32048,0.29703,0.29283,0.25738,0.30339,0.29771,0.29871,0.34258,0.27045,0.30693,0.31935,0.25253,0.12707,0.12934,0.13279,0.13415,0.12977,0.13859,0.13246,0.13048,0.14159,0.13274,0.12396,0.14618,0.10954,0.12049,0.13282,0.136,0.1215,0.12467,0.38331,0.40465,0.37065,0.3783,0.3614,0.37206,0.31847,0.34818,0.34022,0.25464,0.25059,0.22649,0.21902,0.2071,0.23899,0.22194,0.21699,0.20368,0.25066,0.18952,0.1241,0.13545,0.12709,0.13371,0.13166,0.1306,0.13363,0.13097,0.12067,0.13232,0.15468,0.12974,0.12415,0.13241,0.13196,0.14465,0.12985,0.13128,0.56325,0.2984,0.40498,0.33766,0.38072,0.24447,0.31348,0.31842,0.30879,0.22417,0.19015,0.21555,0.20919,0.19215,0.19709,0.21017,0.20598,0.24678,0.18714,0.21783,0.12796,0.1419,0.15019,0.12626,0.13043,0.13611,0.13062,0.13172,0.12709,0.12474,0.16701,0.11825,0.13215,0.10711,0.13304,0.13919,0.12588,0.12784,0.40865,0.40165,0.26374,0.29885,0.50274,0.38,0.26061,0.16382,0.22004,0.18951,0.2344,0.20083,0.20683,0.23375,0.20401,0.21694,0.19632,0.21692,0.18862,0.20522,0.10171,0.13748,0.12284,0.13917,0.1



2867,0.14081,0.13163,0.13324,0.12914,0.12621,0.12608,0.13028,0.13487,0.13418,0.1279,0.13227,0.13267,0.12173,0.33578,0.38953,0.38723,0.29314,0.37687,0.29983,0.19687,0.21004,0.18583,0.19196,0.21798,0.22957,0.20562,0.21699,0.21271,0.19561,0.21183,0.21022,0.17491,0.18452,0.13631,0.12846,0.12027,0.14676,0.13296,0.12976,0.13475,0.12442,0.12254,0.13056,0.13794,0.12315,0.13768,0.14206,0.12662,0.12453,0.13804,0.13905,0.38091,0.35753,0.34348,0.34861,0.36894,0.24569,0.19038,0.21261,0.3522,0.19036,0.22838,0.183,0.19223,0.22058,0.20252,0.19003,0.1793,0.20344,0.22614,0.24263,0.13133,0.13464,0.13335,0.14298,0.14711,0.12961,0.14385,0.12812,0.12936,0.12846,0.13246,0.14665,0.11734,0.12506,0.1291,0.11909,0.12363,0.13177,0.37751,0.25444,0.35475,0.28984,0.20781,0.21828,0.21992,0.19734,0.21078,0.22427,0.20181,0.17122,0.16335,0.22572,0.2154,0.17792,0.23189,0.19245,0.25786,0.2173,0.11943,0.12846,0.12636,0.13115,0.12309,0.13346,0.13084,0.1481,0.13563,0.11877,0.12633,0.13137,0.12843,0.12635,0.11933,0.14822,0.13033,0.13661,0.4235,0.22694,0.23859,0.22459,0.26565,0.19953,0.1964,0.25709,0.1948,0.22305,0.18959,0.20227,0.28228,0.22744,0.19359,0.21731,0.20811,0.20977,0.19153,0.1313,0.12766,0.13342,0.12583,0.13006,0.1406,0.12669,0.13733,0.13878,0.13612,0.16368,0.12321,0.14347,0.13316,0.13082,0.13848,0.13487,0.06086,0.2155,0.17652,0.22681,0.252,0.3155,0.22006,0.14437,0.17719,0.17685,0.1803,0.20815,0.23061,0.22552,0.23351,0.20355,0.18444,0.19781,0.21103,0.21067,0.13383,0.1355,0.12721,0.14321,0.12616,0.1317,0.13375,0.12995,0.12566,0.11984,0.13754,0.13557,0.12462,0.13565,0.1338,0.12741,0.13298,0.055945,0.21472,0.19131,0.2173,0.1999,0.2638,0.19227,0.22419,0.18216,0.18928,0.17794,0.20776,0.21137,0.22368,0.1905,0.18842,0.25025,0.19026,0.20836,0.12447,0.13272,0.1274,0.12522,0.10988,0.12865,0.1241,0.12291,0.12573,0.13401,0.14555,0.13959,0.12617,0.12856,0.13107,0.12676,0.12732,0.12256,0.056228,0.2372,0.28406,0.20896,0.17494,0.23137,0.2,0.25768,0.14717,0.17224,0.25874,0.19352,0.17881,0.21238,0.22679,0.23926,0.2417,0.2373,0.19545,0.12676,0.11736,0.1344,0.12197,0.12762,0.12945,0.13149,0.13179,0.16569,0.13045,0.12836,0.12217,0.12684,0.12551,0.12277,0.14001,0.14383,0.058954,0.06002,0.059945,0.18352,0.22993,0.22248,0.19838,0.2221,0.11284,0.18783,0.21754,0.15098,0.18464,0.20533,0.20469,0.21642,0.18966,0.21623,0.11427,0.13293,0.12949,0.1256,0.13055,0.13409,0.13587,0.11136,0.12525,0.12487,0.11857,0.15078,0.14174,0.12744,0.12682,0.13183,0.12819,0.12578,0.05694,0.061908,0.062475,0.061415,0.17207,0.24074,0.24297,0.26188,0.19295,0.24585,0.23515,0.24275,0.23398,0.21124,0.1886,0.21331,0.13157,0.12816,0.17895,0.12901,0.14098,0.12984,0.1252,0.12888,0.1241,0.12127,0.1459,0.13947,0.12766,0.12044,0.14364,0.13262,0.12385,0.13934,0.13182,0.11645,0.060144,0.057219,0.057044,0.054381,0.059174,0.059,0.19418,0.1617,0.18175,0.19762,0.2109,0.20146,0.20594,0.20503,0.14003,0.13065,0.13768,0.13107,0.13044,0.14641,0.13276,0.13043,0.13238,0.1263,0.13569,0.10666,0.14382,0.1109,0.1335,0.1298,0.15379,0.13425,0.13007,0.12871,0.12937,0.13917,0.10601,0.062027,0.06106,0.060995,0.05953,0.058411,0.053726,0.19195,0.20038,0.27914,0.17051,0.21907,0.061012,0.060156,0.13445,0.11607,0.1198,0.1354,0.12054,0.13155,0.11387,0.12333,0.1391,0.12944,0.12997,0.13465,0.12764,0.12594,0.13013,0.13023,0.13544,0.13853,0.13764,0.12597,0.10994,0.0555,0.05688,0.057272,0.063009,0.055756,0.054106,0.062816,0.056879,0.058643,0.061885,0.16198,0.21747,0.060836,0.053929,0.059339,0.057698,0.13782,0.12208,0.135,0.12913,0.15163,0.14484,0.14658,0.13217,0.13194,0.12291,0.11831,0.1317,0.13503,0.13024,0.11917,0.11059,0.13572,0.13404,0.13064,0.057312,0.057835,0.058182,0.062249,0.060971,0.0575,0.

056647,0.059195,0.055649,0.0573,0.059149,0.060084,0.065327,0.055608,0.06084,0.054906,0.0586,0.1511,0.13989,0.12559,0.13398,0.12158,0.1327,0.12725,0.1293,0.1176,0.12204,0.13172,0.12864,0.12806,0.13785,0.12826,0.13049,0.06358,0.060374,0.066386,0.058281,0.060232,0.054963,0.059733,0.057784,0.0597,0.061828,0.057045,0.056388,0.05877,0.054348,0.06303,0.056916,0.057647,0.061024,0.061015,0.14103,0.13192,0.12556,0.13814,0.1275,0.11526,0.14218,0.11917,0.16598,0.13275,0.12542,0.1231,0.1357,0.058093,0.05624,0.057492,0.057569,0.061173,0.059886,0.054225,0.062612,0.059596,0.063826,0.056158,0.058282,0.061738,0.059515,0.05915,0.059557,0.057887,0.059571,0.060987,0.057179,0.05697,0.1316,0.12645,0.13008,0.13407,0.12889,0.12848,0.1323,0.12962,0.14488,0.058254,0.061925,0.064986,0.062406,0.061594,0.049695,0.061706,0.064709,0.061739,0.057616,0.060099,0.063685,0.062153,0.060159,0.057502,0.059909,0.061059,0.058646,0.054975,0.058365,0.059897,0.060444,0.056628,0.0618,0.062234,0.12826,0.13295,0.12935,0.126,0.059005,0.056153,0.051479,0.059812,0.054789,0.056222,0.062917,0.054109,0.065315,0.052785,0.058054,0.056894,0.058023,0.060981,0.063892,0.057071,0.056267,0.06057,0.056844,0.062273,0.057552,0.053915,0.055994,0.061411,0.05595,0.060628,0.060214,0.055498,0.061862,0.057215,0.062491,0.055777,0.061032,0.058464,0.052654,0.060933,0.058062,0.056581,0.060518,0.060456,0.057426,0.060019,0.056431,0.052068,0.062081,0.060856,0.058602,0.058895,0.058176,0.060997,0.052922,0.057194,0.062174,0.051587,0.059918,0.060241,0.058678,0.05972,0.055142,0.057392,0.063717,0.060231,0.05488,0.053828,0.063256,0.064856,0.061072,0.059612,0.056557,0.05568,0.054587,0.063313,0.063467,0.056297,0.059748,0.055333,0.056451,0.059876,0.056279,0.053755,0.058118,0.057371,0.06058,0.05884,0.058575,0.056476,0.063028,0.061798,0.060995,0.059947,0.057605,0.056589,0.06031,0.060645,0.057286,0.059225,0.059108,0.055534,0.054793,0.056209,0.051734,0.060443,0.061647,0.05797,0.061939,0.058418,0.060221,0.061913,0.065248,0.054148,0.057694,0.057969,0.054249,0.061157,0.060865,0.053956,0.058833,0.056413,0.058608,0.056903,0.060898,0.058573,0.060712,0.060941,0.065135,0.056931,0.055678,0.06344,0.05197,0.059044,0.062197,0.058942,0.063635,0.060856,0.06054,0.057037,0.061961,0.059675,0.058778,0.055645,0.059138,0.054431,0.06476,0.058045,0.053778,0.058168,0.058027,0.054599,0.056331,0.058683,0.057233,0.061239,0.061188,0.061253,0.060507,0.056823,0.060667,0.057936,0.06167,0.052409,0.058024,0.056155,0.058859,0.060404,0.060095,0.059577,0.059712,0.063263,0.062284,0.05743,0.060305,0.058125,0.058961,0.056821,0.055674,0.059112,0.059837,0.05949,0.057665,0.058323,0.057552,0.056677,0.058351,0.060345,0.062895,0.054273,0.056521,0.055538,0.054603,0.057274,0.059661,0.062177,0.058472,0.058652,0.052948,0.2114,0.18877,0.21067,0.20171,0.19715,0.20202,0.20617,0.19727,0.20565,0.20083,0.19757,0.20451,0.20028,0.19457,0.19091,0.1999,0.21252,0.20021,0.20089,0.20414,0.31059,0.34698,0.33328,0.3071,0.19989,0.20813,0.20388,0.20108,0.19912,0.19278,0.2027,0.20341,0.20435,0.20665,0.20207,0.20368,0.20017,0.19318,0.19877,0.35558,0.29399,0.24379,0.29368,0.281,0.24867,0.29979,0.20532,0.19967,0.20665,0.20263,0.19657,0.21956,0.20345,0.20734,0.20331,0.20529,0.2064,0.21232,0.20539,0.19442,0.19149,0.45141,0.32399,0.23317,0.2982,0.30896,0.30601,0.29373,0.26965,0.24516,0.29209,0.19978,0.19517,0.20682,0.19493,0.20146,0.20442,0.20056,0.20173,0.20038,0.18912,0.19861,0.19738,0.19867,0.20691,0.20767,0.28824,0.35789,0.3413,0.26044,0.27945,0.26585,0.27927,0.25726,0.26399,0.27834,0.26114,0.28259,0.20669,0.20965,0.19081,0.2041,0.19811,0.20906,0.21393,0.21038,0.20494,0.21124,0.19483,0.20012,0.20259,0.20104,0.20569,0.199,0.38657,0.

29194,0.49415,0.37879,0.29826,0.26478,0.315,0.29922,0.25916,0.23662,0.26825,0.29268,0.30086,0.25305,0.21277,0.20249,0.20546,0.19995,0.19975,0.2004,0.20907,0.18712,0.20787,0.1995,0.20443,0.20454,0.19462,0.20433,0.20255,0.19512,0.38668,0.31066,0.45641,0.32162,0.4043,0.41486,0.33635,0.29286,0.29494,0.30204,0.25962,0.34161,0.30382,0.24977,0.25479,0.33936,0.20659,0.20335,0.2049,0.19961,0.20597,0.18564,0.20104,0.20359,0.20541,0.20699,0.20172,0.20403,0.20682,0.20161,0.19609,0.20464,0.20616,0.36545,0.39568,0.3951,0.2285,0.24244,0.33746,0.26693,0.25916,0.2453,0.30777,0.28348,0.2641,0.30907,0.31376,0.21193,0.31163,0.28443,0.20212,0.20001,0.20678,0.1976,0.20087,0.19657,0.19074,0.1964,0.19405,0.19917,0.20303,0.20126,0.20214,0.13197,0.15121,0.12544,0.20566,0.35086,0.42954,0.34362,0.32105,0.32552,0.36884,0.26136,0.25295,0.31318,0.32218,0.30048,0.28583,0.28275,0.2582,0.28261,0.30718,0.27073,0.29059,0.19782,0.20885,0.19889,0.20196,0.20665,0.19484,0.20382,0.19798,0.20931,0.19947,0.19304,0.11854,0.13304,0.13622,0.12675,0.1235,0.13049,0.20265,0.35425,0.40827,0.35378,0.33014,0.47189,0.33662,0.36741,0.32617,0.31818,0.28295,0.26504,0.28205,0.27042,0.28436,0.23973,0.2797,0.24336,0.28089,0.20737,0.20829,0.20218,0.19928,0.20117,0.20529,0.21071,0.20689,0.20521,0.13177,0.11476,0.14454,0.15017,0.13618,0.12249,0.12365,0.11799,0.12737,0.19907,0.25165,0.34626,0.39264,0.41409,0.28864,0.36681,0.3286,0.25756,0.22911,0.30429,0.30889,0.25073,0.32827,0.26442,0.35079,0.34485,0.28153,0.31508,0.24061,0.19816,0.20474,0.20039,0.19434,0.20123,0.21324,0.12512,0.13565,0.1305,0.11728,0.12908,0.13032,0.12357,0.11682,0.11584,0.12895,0.12568,0.15173,0.40354,0.3046,0.39905,0.39148,0.34016,0.34378,0.28915,0.23895,0.32947,0.26702,0.30365,0.28189,0.23339,0.27622,0.26527,0.25268,0.29146,0.25161,0.31571,0.19908,0.20387,0.20323,0.13739,0.13749,0.14204,0.13996,0.12598,0.11861,0.13292,0.14328,0.13154,0.12989,0.12665,0.13301,0.12667,0.14729,0.12087,0.37741,0.33339,0.41397,0.35536,0.32294,0.38469,0.30125,0.39861,0.29085,0.27208,0.28186,0.26371,0.30554,0.30307,0.28986,0.34961,0.28249,0.2911,0.30665,0.24855,0.12864,0.12862,0.1354,0.13223,0.12765,0.13472,0.13096,0.12977,0.14376,0.12983,0.12542,0.14489,0.10808,0.12004,0.13072,0.13649,0.12089,0.1265,0.40171,0.39608,0.34664,0.3608,0.3182,0.35626,0.34866,0.31563,0.30306,0.2609,0.25949,0.23812,0.21435,0.19167,0.25768,0.21864,0.21182,0.19745,0.22669,0.19722,0.12447,0.13424,0.12516,0.13612,0.13237,0.13111,0.13179,0.13296,0.12154,0.13519,0.15149,0.13193,0.12154,0.13074,0.1306,0.14166,0.12807,0.12989,0.51625,0.28582,0.40553,0.3541,0.39747,0.27607,0.31355,0.32421,0.27773,0.2118,0.1944,0.22851,0.17662,0.17943,0.19903,0.22341,0.22832,0.25473,0.18358,0.20338,0.12748,0.1424,0.14544,0.12621,0.13025,0.13107,0.13317,0.12934,0.12891,0.12404,0.16623,0.11936,0.1327,0.10668,0.13216,0.13759,0.12743,0.12663,0.39842,0.37219,0.27874,0.28374,0.51009,0.39185,0.2415,0.16228,0.21976,0.21161,0.21397,0.21073,0.21592,0.22182,0.19138,0.21907,0.19405,0.20452,0.19979,0.20075,0.10031,0.13823,0.12255,0.13721,0.1263,0.13749,0.13094,0.13227,0.13038,0.12671,0.12613,0.12959,0.13663,0.13411,0.12819,0.13301,0.1345,0.12323,0.31575,0.41131,0.39904,0.26975,0.35537,0.32654,0.20576,0.22354,0.18142,0.20581,0.20076,0.23254,0.21058,0.2051,0.21727,0.20448,0.21649,0.21057,0.16693,0.17597,0.13353,0.12804,0.1173,0.15076,0.13416,0.13177,0.13262,0.12501,0.12198,0.12895,0.13924,0.11989,0.13651,0.14233,0.1262,0.1265,0.13484,0.13676,0.41861,0.33726,0.33239,0.34426,0.37339,0.2528,0.19187,0.19624,0.33813,0.15683,0.20433,0.17976,0.19632,0.21744,0.1912,0.17511,0.18199,0.20158,0.21896,0.24013,0.12933,0.13434,0.13309,0.14527,0.1464,0.12674,0.14571,0.

1273,0.12814,0.12758,0.13352,0.14312,0.11475,0.12844,0.12955,0.1177,0.  
1207,0.13326,0.3469,0.2472,0.35709,0.27876,0.18819,0.2025,0.20354,0.18  
66,0.19798,0.25142,0.18813,0.16934,0.16244,0.2129,0.2274,0.18553,0.229  
3,0.18354,0.25874,0.19771,0.11829,0.12591,0.12762,0.13231,0.12133,0.13  
256,0.12975,0.1499,0.13265,0.11935,0.12596,0.12937,0.1284,0.12491,0.11  
909,0.14522,0.13062,0.13597,0.37363,0.22814,0.22113,0.22775,0.26542,0.  
20081,0.20352,0.27628,0.19793,0.20861,0.17845,0.19368,0.28519,0.22156,  
0.19677,0.21429,0.21763,0.20334,0.1814,0.13006,0.12596,0.13391,0.12467  
,0.13278,0.14229,0.12529,0.13567,0.13797,0.13484,0.16376,0.12559,0.146  
95,0.13387,0.1289,0.13666,0.13318,0.058383,0.21646,0.20031,0.22379,0.2  
3485,0.30367,0.21335,0.13928,0.16647,0.15561,0.15915,0.21398,0.23455,0  
.235,0.2243,0.2093,0.18093,0.19793,0.21169,0.22096,0.1316,0.13598,0.12  
382,0.14329,0.12588,0.13149,0.13172,0.12834,0.12633,0.11899,0.1368,0.1  
3396,0.12366,0.13484,0.13283,0.12595,0.13311,0.05558,0.2084,0.2106,0.2  
3219,0.21123,0.26232,0.18227,0.22485,0.18684,0.18374,0.1615,0.20533,0.  
20941,0.2188,0.18799,0.18018,0.24531,0.1879,0.20455,0.12512,0.13242,0.  
12729,0.12582,0.11117,0.12751,0.1225,0.12625,0.12305,0.13543,0.14832,0  
.1374,0.12593,0.12659,0.1317,0.12763,0.12697,0.12298,0.053227,0.23694,  
0.2792,0.22244,0.16589,0.25618,0.19467,0.2698,0.13754,0.15615,0.24362,  
0.21825,0.1647,0.21529,0.21878,0.23349,0.23874,0.25578,0.20234,0.12741  
,0.11345,0.13027,0.12089,0.12576,0.13061,0.12955,0.13317,0.16251,0.130  
69,0.1271,0.12082,0.12567,0.12674,0.12219,0.1395,0.14268,0.05723,0.059  
512,0.059759,0.1786,0.23627,0.2034,0.19576,0.20518,0.10218,0.184,0.207  
14,0.14378,0.18848,0.20611,0.19462,0.23186,0.20735,0.20996,0.11217,0.1  
3509,0.12921,0.12624,0.12939,0.13386,0.13375,0.11498,0.12433,0.12484,0  
.11807,0.15266,0.14083,0.12631,0.12577,0.13161,0.12834,0.12611,0.05528  
5,0.056567,0.061244,0.059067,0.17446,0.23805,0.24196,0.25577,0.18106,0  
.25693,0.21377,0.22023,0.23246,0.20841,0.17259,0.2161,0.13117,0.1298,0  
.18343,0.1289,0.14163,0.12919,0.12711,0.12945,0.12552,0.12279,0.14516,  
0.13845,0.12818,0.12032,0.14514,0.13209,0.12145,0.13839,0.12824,0.1151  
1,0.059829,0.056138,0.053423,0.052616,0.056267,0.057628,0.19454,0.1495  
7,0.18966,0.19824,0.23138,0.20053,0.19607,0.22003,0.1399,0.12885,0.133  
02,0.1316,0.13089,0.14746,0.13328,0.12861,0.13394,0.12457,0.1345,0.106  
04,0.14447,0.1087,0.13373,0.13037,0.153,0.13404,0.13207,0.13092,0.1296  
2,0.1387,0.10529,0.058558,0.058713,0.05951,0.057617,0.055709,0.05181,0  
.19751,0.22954,0.25488,0.16438,0.22016,0.059724,0.059087,0.13237,0.113  
05,0.11924,0.13591,0.11785,0.12861,0.11404,0.12061,0.14007,0.12851,0.1  
2745,0.136,0.12879,0.1262,0.12886,0.13037,0.13277,0.13838,0.1365,0.124  
97,0.10955,0.054758,0.054803,0.058926,0.060198,0.054334,0.051645,0.061  
502,0.054284,0.056015,0.058711,0.17174,0.22364,0.059294,0.054227,0.057  
98,0.054235,0.13789,0.11912,0.13323,0.12747,0.15197,0.1436,0.14524,0.1  
3194,0.13149,0.12351,0.11896,0.12958,0.13497,0.132,0.11732,0.11149,0.1  
3343,0.13136,0.13252,0.055463,0.056914,0.055903,0.059951,0.056034,0.05  
4244,0.054711,0.058634,0.054534,0.053663,0.055611,0.05619,0.064517,0.0  
50947,0.057739,0.053217,0.05707,0.15181,0.13708,0.12385,0.13434,0.1191  
,0.13134,0.12499,0.13044,0.12061,0.12272,0.13039,0.1274,0.12803,0.1380  
1,0.13009,0.13048,0.060808,0.058977,0.064577,0.053851,0.057615,0.05309  
8,0.056633,0.057162,0.05752,0.059331,0.056962,0.055478,0.057125,0.0533  
48,0.059457,0.054608,0.053319,0.057496,0.059447,0.14256,0.13259,0.1269  
3,0.13642,0.12708,0.1151,0.14263,0.11852,0.16585,0.13497,0.12439,0.122  
95,0.13525,0.056212,0.055766,0.055433,0.055779,0.058985,0.054853,0.052  
783,0.059918,0.058633,0.061235,0.053371,0.056403,0.060787,0.057638,0.0

55218,0.057517,0.056066,0.056571,0.059011,0.055411,0.05586,0.13386,0.1  
2703,0.12985,0.1325,0.12746,0.12891,0.13286,0.13019,0.1432,0.055341,0.  
057698,0.063924,0.060429,0.058982,0.049096,0.058422,0.062262,0.05902,0  
.056744,0.056198,0.058834,0.057884,0.057589,0.054914,0.056771,0.059353  
,0.05507,0.054317,0.054218,0.057398,0.057687,0.055452,0.058806,0.06009  
1,0.12766,0.13212,0.12756,0.1236,0.057262,0.056264,0.048443,0.056431,0  
.053309,0.05305,0.05815,0.050227,0.061603,0.051095,0.055232,0.054906,0  
.056301,0.057788,0.059657,0.05617,0.053933,0.058572,0.056615,0.06046,0  
.055989,0.052281,0.052285,0.059585,0.05586,0.056576,0.05717,0.052141,0  
.058221,0.055147,0.058566,0.055534,0.059174,0.057309,0.049749,0.05766,  
0.056898,0.056253,0.060241,0.056288,0.055235,0.057636,0.053014,0.04904  
8,0.058734,0.059052,0.056091,0.057581,0.055353,0.057321,0.052896,0.055  
98,0.05991,0.051752,0.056505,0.057108,0.054177,0.056854,0.054164,0.055  
525,0.058953,0.056737,0.0536,0.052595,0.060842,0.059549,0.05864,0.0588  
94,0.054877,0.054379,0.049694,0.060268,0.059379,0.055156,0.057351,0.05  
3855,0.05557,0.059326,0.05588,0.052642,0.056727,0.058183,0.058081,0.05  
7355,0.055582,0.055458,0.06148,0.059246,0.058483,0.057224,0.0537,0.054  
267,0.057897,0.058262,0.055938,0.058021,0.058658,0.05327,0.054192,0.05  
3864,0.051529,0.055808,0.059631,0.056327,0.061841,0.054843,0.05732,0.0  
6037,0.065,0.051327,0.05701,0.053903,0.052596,0.057328,0.058028,0.0529  
67,0.057787,0.054312,0.055767,0.055973,0.057817,0.055306,0.056598,0.06  
0544,0.065119,0.058032,0.053024,0.06075,0.048601,0.057842,0.060064,0.0  
56619,0.061169,0.0582,0.056428,0.055863,0.058083,0.056505,0.057249,0.0  
52984,0.056296,0.053571,0.060816,0.055455,0.051219,0.055262,0.055082,0  
.051046,0.053901,0.057939,0.052887,0.058378,0.058824,0.05791,0.059333,  
0.054437,0.061302,0.056024,0.05953,0.050885,0.05594,0.054585,0.055447,  
0.059017,0.058414,0.057145,0.057398,0.06081,0.060462,0.054787,0.058624  
,0.05447,0.057582,0.054403,0.05287,0.055162,0.057236,0.05748,0.055865,  
0.057191,0.055371,0.053999,0.056214,0.057506,0.059489,0.053108,0.05478  
5,0.05364,0.054753,0.052624,0.056224,0.05856,0.055922,0.055917,0.05088

4

0.21173,0.18811,0.2134,0.20015,0.19825,0.19917,0.21154,0.19725,0.20598  
,0.20165,0.19869,0.20048,0.20051,0.19741,0.19277,0.19692,0.21236,0.203  
37,0.19852,0.20297,0.29208,0.3574,0.32862,0.31214,0.20367,0.20491,0.20  
21,0.20145,0.20261,0.19466,0.20745,0.20552,0.20449,0.20953,0.20658,0.2  
0555,0.20129,0.19554,0.19819,0.32484,0.2941,0.25132,0.2975,0.29184,0.2  
3186,0.32812,0.20585,0.20392,0.20686,0.20342,0.19857,0.21855,0.20803,0  
.20483,0.20237,0.2061,0.20392,0.21001,0.20651,0.19675,0.19342,0.45474,  
0.33228,0.24984,0.29671,0.28179,0.30752,0.30591,0.28692,0.24365,0.3052  
2,0.20018,0.20058,0.20624,0.19753,0.2043,0.20953,0.2033,0.20786,0.2019  
6,0.19183,0.19979,0.19987,0.20323,0.2085,0.21099,0.29455,0.3496,0.3516  
5,0.26968,0.28471,0.26479,0.27661,0.27759,0.26822,0.27825,0.26663,0.30  
229,0.20355,0.21379,0.19178,0.20278,0.20049,0.21209,0.21221,0.21172,0.  
20556,0.20871,0.19505,0.20629,0.20176,0.20236,0.2063,0.20537,0.34268,0  
.29531,0.46795,0.35156,0.29095,0.27847,0.30865,0.2904,0.27574,0.25936,  
0.25942,0.3015,0.29636,0.25556,0.21303,0.20589,0.20658,0.20081,0.20151  
,0.20117,0.20269,0.19227,0.20911,0.20226,0.20492,0.20572,0.1946,0.2058  
4,0.20032,0.19787,0.3546,0.33603,0.46853,0.32867,0.37453,0.38502,0.346  
49,0.30356,0.29211,0.30353,0.26279,0.32838,0.3106,0.2581,0.26679,0.308  
62,0.20917,0.20677,0.20108,0.20247,0.20743,0.18566,0.20359,0.20395,0.2  
069,0.21007,0.2042,0.19868,0.20519,0.20014,0.19687,0.20402,0.20699,0.3  
5026,0.37452,0.40624,0.22794,0.25852,0.33311,0.26987,0.2388,0.24555,0.

30818,0.28917,0.2664,0.31078,0.31487,0.22072,0.31092,0.27637,0.2032,0.  
20021,0.2076,0.20426,0.20278,0.19675,0.19508,0.1968,0.19515,0.19853,0.  
20431,0.2023,0.20363,0.13182,0.15099,0.12492,0.20722,0.33324,0.41424,0.  
.32365,0.34533,0.32653,0.39133,0.31325,0.2771,0.30911,0.31035,0.29641,  
0.28399,0.25182,0.25431,0.28793,0.2902,0.27351,0.28099,0.20015,0.20702  
,0.20183,0.20322,0.21015,0.19614,0.20927,0.20047,0.2112,0.20258,0.1976  
1,0.11707,0.13042,0.13423,0.12811,0.12188,0.12773,0.20091,0.34298,0.41  
344,0.32463,0.31225,0.45965,0.33206,0.35434,0.33222,0.33939,0.28932,0.  
2568,0.29715,0.26043,0.28553,0.23102,0.25972,0.23623,0.2868,0.20505,0.  
20817,0.19974,0.20082,0.1995,0.2034,0.2162,0.20711,0.20668,0.13141,0.1  
1465,0.14372,0.14929,0.13357,0.12022,0.12563,0.11795,0.12897,0.20318,0.  
.26327,0.34243,0.3906,0.41735,0.32099,0.34922,0.36265,0.27116,0.22674,  
0.30536,0.32491,0.25213,0.33962,0.25555,0.34718,0.31699,0.28601,0.3015  
7,0.22583,0.19814,0.20735,0.20035,0.1927,0.2026,0.2123,0.12602,0.13314  
,0.13112,0.11512,0.12889,0.1286,0.11889,0.11578,0.1161,0.12741,0.12553  
,0.15216,0.39647,0.34921,0.40822,0.34815,0.3436,0.30457,0.36121,0.2408  
3,0.31695,0.26899,0.2992,0.27494,0.23832,0.27962,0.25247,0.24992,0.298  
16,0.24967,0.31182,0.1953,0.20455,0.20316,0.13682,0.13781,0.14103,0.14  
022,0.12474,0.1188,0.13126,0.14578,0.12972,0.12932,0.12526,0.13123,0.1  
2541,0.14429,0.11868,0.37306,0.3404,0.4041,0.38028,0.30296,0.38523,0.3  
1668,0.3789,0.27193,0.27495,0.28893,0.27074,0.32258,0.29962,0.29295,0.  
36247,0.27225,0.28901,0.32189,0.25142,0.13075,0.12909,0.1348,0.13016,0.  
.12873,0.13251,0.12907,0.12773,0.14153,0.12932,0.12304,0.14341,0.10543  
,0.11913,0.13037,0.13395,0.11971,0.12749,0.3701,0.41437,0.33655,0.3611  
,0.31566,0.34519,0.34826,0.32844,0.3134,0.26877,0.25088,0.23502,0.2166  
2,0.18947,0.24781,0.22057,0.21549,0.19257,0.21653,0.19073,0.12399,0.13  
441,0.12568,0.13495,0.1328,0.13188,0.12974,0.13364,0.1227,0.13391,0.15  
072,0.12988,0.12216,0.13039,0.13018,0.14001,0.12721,0.1311,0.52617,0.2  
2604,0.37458,0.35469,0.4137,0.29861,0.34138,0.28923,0.31326,0.22899,0.  
1822,0.21377,0.18243,0.19201,0.19268,0.22388,0.22794,0.24269,0.19381,0.  
.19381,0.12726,0.14186,0.14517,0.1241,0.13174,0.13164,0.13066,0.12953,  
0.12912,0.12171,0.16773,0.1212,0.13254,0.10582,0.13451,0.13576,0.12735  
,0.12685,0.33049,0.39459,0.30247,0.29438,0.48441,0.3892,0.22377,0.1544  
7,0.22945,0.22321,0.21419,0.20774,0.20685,0.21451,0.19141,0.21785,0.18  
635,0.20334,0.19904,0.20644,0.10016,0.13771,0.12159,0.13507,0.12623,0.  
13886,0.13132,0.13113,0.12569,0.12891,0.12973,0.12947,0.13762,0.13616,  
0.12819,0.1307,0.13303,0.12185,0.30605,0.41207,0.40857,0.29316,0.33365  
,0.29456,0.20783,0.23874,0.17558,0.18373,0.17904,0.22978,0.21681,0.211  
22,0.20599,0.18723,0.22325,0.20971,0.16725,0.17166,0.13148,0.1268,0.11  
587,0.14926,0.13501,0.13062,0.13406,0.12418,0.12299,0.13085,0.13813,0.  
12028,0.13564,0.14155,0.12851,0.1263,0.13407,0.13519,0.44713,0.32623,0.  
.32207,0.32003,0.40346,0.24862,0.19757,0.21042,0.32596,0.17374,0.22065  
,0.18194,0.19713,0.214,0.18275,0.18205,0.18882,0.19272,0.21904,0.23935  
,0.12964,0.13595,0.13531,0.14529,0.14573,0.1285,0.1466,0.12831,0.12816  
,0.1282,0.13141,0.14068,0.11533,0.1308,0.12951,0.11781,0.1193,0.1329,0.  
.36004,0.28347,0.35423,0.28926,0.18497,0.21024,0.20077,0.2088,0.21366,  
0.245,0.20161,0.17726,0.16021,0.21903,0.2379,0.19531,0.20477,0.1932,0.  
24241,0.2003,0.11675,0.12478,0.13071,0.13123,0.11904,0.13365,0.13099,0.  
.1492,0.13457,0.11983,0.12588,0.12955,0.12853,0.12419,0.11848,0.14176,  
0.13042,0.13344,0.30134,0.20635,0.19655,0.22929,0.2506,0.17,0.19404,0.  
28439,0.19785,0.21318,0.18775,0.18328,0.28332,0.20609,0.19885,0.21733,  
0.22825,0.20264,0.17624,0.12853,0.12801,0.13388,0.12491,0.13353,0.1406

8, 0.12372, 0.13769, 0.13782, 0.13308, 0.16323, 0.12522, 0.14582, 0.13714, 0.13008, 0.13507, 0.13143, 0.054618, 0.21849, 0.20383, 0.22221, 0.24356, 0.27827, 0.20314, 0.12216, 0.16271, 0.16478, 0.15299, 0.22524, 0.22038, 0.24551, 0.21522, 0.19986, 0.17699, 0.20367, 0.2015, 0.23158, 0.13089, 0.13249, 0.12376, 0.1433, 0.12442, 0.13092, 0.13136, 0.12835, 0.12398, 0.11782, 0.13619, 0.13238, 0.1212, 0.13303, 0.13318, 0.12442, 0.13451, 0.055236, 0.21061, 0.21043, 0.22431, 0.20462, 0.25175, 0.17639, 0.23313, 0.20513, 0.17447, 0.16471, 0.20591, 0.21297, 0.21358, 0.1893, 0.18342, 0.23379, 0.20004, 0.19121, 0.12572, 0.13037, 0.12815, 0.12792, 0.11195, 0.12866, 0.12054, 0.12537, 0.12701, 0.13492, 0.14803, 0.13801, 0.12684, 0.12664, 0.13042, 0.12737, 0.12362, 0.12048, 0.052371, 0.22422, 0.26309, 0.19009, 0.17125, 0.27687, 0.19611, 0.2787, 0.14131, 0.14631, 0.22822, 0.2199, 0.16661, 0.20795, 0.21229, 0.22375, 0.23967, 0.24603, 0.21006, 0.13085, 0.11503, 0.12894, 0.11915, 0.12212, 0.13258, 0.12816, 0.1298, 0.15991, 0.13248, 0.12896, 0.11984, 0.12619, 0.12945, 0.12105, 0.13878, 0.14332, 0.057496, 0.058679, 0.055326, 0.17229, 0.24714, 0.18772, 0.17221, 0.19948, 0.095261, 0.17911, 0.21435, 0.15933, 0.18687, 0.22251, 0.19301, 0.23059, 0.22285, 0.21714, 0.11438, 0.13327, 0.12644, 0.12713, 0.12937, 0.13242, 0.1334, 0.11426, 0.12282, 0.1258, 0.11778, 0.15402, 0.1379, 0.12549, 0.12248, 0.1315, 0.12985, 0.12453, 0.056416, 0.054874, 0.059384, 0.056268, 0.17213, 0.22997, 0.25381, 0.26866, 0.18729, 0.25364, 0.21605, 0.2076, 0.24104, 0.19022, 0.17965, 0.20168, 0.12867, 0.12636, 0.18302, 0.12728, 0.14066, 0.13205, 0.12614, 0.13186, 0.12637, 0.12141, 0.14603, 0.13679, 0.12954, 0.12162, 0.1459, 0.12931, 0.12175, 0.13636, 0.12968, 0.11577, 0.057902, 0.052909, 0.050981, 0.050678, 0.054787, 0.054405, 0.17274, 0.17344, 0.17079, 0.18779, 0.23242, 0.20174, 0.22448, 0.22463, 0.13955, 0.12877, 0.13381, 0.13188, 0.13082, 0.14636, 0.13118, 0.12838, 0.13287, 0.12464, 0.13419, 0.10601, 0.14336, 0.10884, 0.13133, 0.12941, 0.15278, 0.13352, 0.13255, 0.1284, 0.13031, 0.14, 0.10577, 0.057413, 0.05603, 0.056767, 0.054298, 0.053881, 0.049775, 0.22051, 0.22173, 0.2571, 0.1862, 0.21793, 0.05623, 0.057891, 0.13279, 0.11187, 0.116, 0.13441, 0.11806, 0.12662, 0.11316, 0.11906, 0.13888, 0.12872, 0.12823, 0.13627, 0.12849, 0.12549, 0.12763, 0.12681, 0.13347, 0.13919, 0.13595, 0.12289, 0.10736, 0.052254, 0.053128, 0.054732, 0.059167, 0.052164, 0.05103, 0.059041, 0.052927, 0.055412, 0.0571, 0.16939, 0.23373, 0.057867, 0.057058, 0.054687, 0.051287, 0.13817, 0.11697, 0.13481, 0.128, 0.14682, 0.14565, 0.14385, 0.13049, 0.12957, 0.12234, 0.11831, 0.12894, 0.1324, 0.13346, 0.11531, 0.11142, 0.13326, 0.13072, 0.12737, 0.052313, 0.05464, 0.055804, 0.058477, 0.054758, 0.05228, 0.052098, 0.058494, 0.054721, 0.052253, 0.052675, 0.055014, 0.063064, 0.051555, 0.056053, 0.051735, 0.057341, 0.15455, 0.13645, 0.12216, 0.13377, 0.11904, 0.13222, 0.12478, 0.12929, 0.12002, 0.12279, 0.12987, 0.12654, 0.12617, 0.13635, 0.12916, 0.12797, 0.059141, 0.05552, 0.063225, 0.051881, 0.054723, 0.051934, 0.053465, 0.056789, 0.054179, 0.057246, 0.054455, 0.052057, 0.054954, 0.052476, 0.056335, 0.054109, 0.050779, 0.055861, 0.056787, 0.14369, 0.13026, 0.12564, 0.13639, 0.12422, 0.11573, 0.1424, 0.11912, 0.16677, 0.13277, 0.12842, 0.12262, 0.13797, 0.057088, 0.053375, 0.055539, 0.052245, 0.060632, 0.052982, 0.050794, 0.056946, 0.056864, 0.059171, 0.05249, 0.053366, 0.058597, 0.056848, 0.054099, 0.057386, 0.054202, 0.053379, 0.055744, 0.052934, 0.052493, 0.13361, 0.12748, 0.13039, 0.13395, 0.12712, 0.12934, 0.13258, 0.12979, 0.14244, 0.053713, 0.054907, 0.060342, 0.057872, 0.058128, 0.046094, 0.05801, 0.060293, 0.055931, 0.055629, 0.057532, 0.056468, 0.053748, 0.055494, 0.054352, 0.053766, 0.057506, 0.054584, 0.054257, 0.05344, 0.057747, 0.056037, 0.055024, 0.055851, 0.059698, 0.12675, 0.13366, 0.12483, 0.12234, 0.054432, 0.055471, 0.046704, 0.05636, 0.053376, 0.049427, 0.055176, 0.04952, 0.060578, 0.049569, 0.053378, 0.05336, 0.053597, 0.05581, 0.05665, 0.054358, 0.051782, 0.055901, 0.053725, 0.0

5759,0.052578,0.053396,0.05129,0.056558,0.054092,0.054579,0.054829,0.05246,0.057373,0.052076,0.054219,0.05605,0.057561,0.055531,0.048316,0.056268,0.054956,0.052147,0.05664,0.05764,0.054468,0.054587,0.052486,0.047923,0.056486,0.05622,0.053588,0.056079,0.052042,0.054303,0.052616,0.05294,0.060079,0.051586,0.057623,0.056867,0.054525,0.055702,0.053895,0.054331,0.056997,0.056094,0.052645,0.050346,0.059872,0.057059,0.056899,0.05771,0.051053,0.055232,0.050808,0.058267,0.057883,0.053088,0.055311,0.050884,0.055229,0.058894,0.054198,0.049533,0.056777,0.055428,0.05799,0.056966,0.053457,0.054705,0.058213,0.058374,0.05665,0.055275,0.052443,0.05156,0.05579,0.05632,0.054263,0.056817,0.055795,0.052469,0.052819,0.053762,0.05146,0.056208,0.058522,0.056234,0.059976,0.052239,0.054651,0.057133,0.063472,0.050006,0.055085,0.050386,0.051772,0.055623,0.057443,0.05191,0.057633,0.052502,0.055069,0.054952,0.055024,0.050844,0.055071,0.058506,0.061697,0.054271,0.050718,0.05688,0.046251,0.057629,0.056512,0.054101,0.05885,0.057502,0.054911,0.052973,0.054162,0.05499,0.054248,0.053539,0.054245,0.050641,0.058211,0.052908,0.04967,0.053228,0.05475,0.052366,0.052789,0.055525,0.051938,0.054793,0.054231,0.056176,0.056045,0.052946,0.058624,0.053268,0.055905,0.051018,0.053746,0.052519,0.052026,0.056896,0.055557,0.05287,0.055993,0.057442,0.056858,0.051958,0.056654,0.052621,0.058105,0.054823,0.050517,0.053301,0.057533,0.055707,0.055297,0.053986,0.054305,0.051079,0.053638,0.055663,0.058433,0.05155,0.053456,0.049653,0.050908,0.05224,0.053416,0.056388,0.054144,0.05494,0.050564

0.21383,0.19246,0.21448,0.2001,0.20041,0.19758,0.21181,0.19842,0.20515,0.20303,0.2017,0.20259,0.20214,0.19582,0.194,0.20187,0.21579,0.20329,0.19958,0.20359,0.30717,0.34185,0.32485,0.30293,0.20296,0.2074,0.20504,0.20306,0.2063,0.19899,0.20795,0.20196,0.20278,0.21088,0.20901,0.20558,0.2002,0.19481,0.19906,0.29277,0.29997,0.25244,0.30512,0.26729,0.23592,0.32466,0.20471,0.20457,0.20946,0.20416,0.19557,0.219,0.20875,0.2051,0.20699,0.20432,0.20609,0.2108,0.20934,0.2001,0.19602,0.44597,0.37762,0.2511,0.298,0.27382,0.31127,0.282,0.2671,0.24027,0.29028,0.19901,0.20113,0.20747,0.19883,0.20921,0.20975,0.20783,0.21095,0.20269,0.19314,0.19583,0.19921,0.20166,0.20578,0.21393,0.29261,0.3366,0.35613,0.26672,0.29512,0.25279,0.26629,0.27795,0.26298,0.27241,0.27934,0.28443,0.20763,0.21232,0.19257,0.2036,0.20647,0.21277,0.21379,0.21173,0.20595,0.21106,0.19672,0.21198,0.20298,0.19903,0.2103,0.20746,0.3715,0.30377,0.44473,0.35558,0.29431,0.26688,0.30954,0.30998,0.27505,0.27213,0.25943,0.29863,0.27888,0.26945,0.21218,0.2043,0.20652,0.20052,0.20599,0.20314,0.20309,0.19333,0.21203,0.203,0.20701,0.20686,0.20075,0.20389,0.19899,0.19739,0.37115,0.35441,0.46875,0.3413,0.39054,0.38632,0.3239,0.2883,0.29,0.30069,0.2579,0.34242,0.31502,0.26654,0.2714,0.30938,0.21231,0.20891,0.20211,0.20402,0.20622,0.18631,0.20352,0.20368,0.21144,0.21412,0.19791,0.20223,0.20649,0.20434,0.19194,0.20462,0.20593,0.30957,0.39591,0.44102,0.24621,0.27442,0.33839,0.26696,0.22738,0.22714,0.2962,0.27846,0.25172,0.29267,0.30467,0.21935,0.32186,0.29861,0.20784,0.20258,0.2079,0.20395,0.20308,0.20303,0.19903,0.19845,0.20119,0.19904,0.20304,0.20129,0.20821,0.1302,0.15038,0.12482,0.20947,0.30782,0.42148,0.29276,0.36334,0.34712,0.42452,0.25883,0.27991,0.31095,0.32311,0.31231,0.285,0.25492,0.24705,0.28242,0.2803,0.27822,0.26638,0.20158,0.20784,0.20306,0.20549,0.21289,0.19557,0.21256,0.20377,0.20926,0.20177,0.20057,0.11721,0.12982,0.13423,0.12759,0.12296,0.12775,0.19871,0.36264,0.45334,0.36235,0.33698,0.47656,0.36339,0.33261,0.3243,0.31965,0.31635,0.28467,0.3077



7,0.24461,0.27043,0.2393,0.26179,0.24218,0.28198,0.20459,0.20466,0.201  
66,0.20424,0.20091,0.20251,0.21711,0.20811,0.20513,0.13497,0.11311,0.1  
4295,0.15027,0.13055,0.12189,0.12631,0.11801,0.12997,0.20306,0.25704,0  
.38416,0.35445,0.40148,0.30964,0.3351,0.3984,0.26757,0.24701,0.28955,0  
.32164,0.25728,0.31606,0.25749,0.3312,0.30576,0.28023,0.30678,0.23864,  
0.19705,0.20995,0.20397,0.19534,0.20262,0.21145,0.12651,0.13282,0.1302  
5,0.11505,0.12874,0.12939,0.12055,0.11633,0.11549,0.12577,0.12611,0.15  
098,0.37575,0.35451,0.44176,0.29399,0.32563,0.30201,0.31212,0.23052,0.  
30071,0.26795,0.30473,0.27699,0.24008,0.28025,0.25418,0.23556,0.31119,  
0.24165,0.30772,0.19755,0.20132,0.19698,0.13598,0.13764,0.14013,0.1408  
,0.12574,0.12013,0.1305,0.14599,0.12643,0.12797,0.12351,0.13201,0.1283  
1,0.14444,0.12008,0.36137,0.33935,0.38336,0.42982,0.33875,0.35971,0.31  
468,0.34463,0.27878,0.25349,0.33383,0.2683,0.32514,0.295,0.29672,0.350  
07,0.25303,0.28985,0.31839,0.25092,0.12813,0.13285,0.13613,0.13169,0.1  
2794,0.13223,0.12797,0.12594,0.144,0.13137,0.12141,0.14353,0.10524,0.1  
1844,0.12601,0.13134,0.11632,0.12832,0.41298,0.3999,0.39952,0.35985,0.  
33368,0.36234,0.33031,0.35201,0.34203,0.26991,0.25455,0.25397,0.22345,  
0.18793,0.23274,0.20715,0.23529,0.20914,0.21733,0.19847,0.12472,0.1361  
,0.12372,0.13265,0.1323,0.12989,0.13146,0.13309,0.12193,0.13297,0.1518  
7,0.13003,0.12347,0.13101,0.13145,0.1411,0.12698,0.13001,0.49081,0.210  
79,0.37559,0.40167,0.42817,0.32995,0.33413,0.29598,0.33083,0.22479,0.1  
9897,0.20406,0.19614,0.19718,0.1969,0.2191,0.2141,0.22919,0.19025,0.19  
695,0.1269,0.13899,0.14409,0.12518,0.13103,0.13398,0.12746,0.12806,0.1  
3034,0.1196,0.16928,0.12046,0.13282,0.10455,0.13516,0.13655,0.12772,0.  
1294,0.34063,0.42702,0.36381,0.28324,0.44454,0.39851,0.27609,0.16437,0  
.20452,0.21172,0.21684,0.20308,0.20345,0.19311,0.1928,0.21232,0.18146,  
0.20805,0.21036,0.20244,0.099011,0.14016,0.12263,0.13515,0.12768,0.140  
69,0.1279,0.13332,0.12668,0.12765,0.13138,0.12673,0.13818,0.1322,0.129  
79,0.13034,0.13106,0.12007,0.29654,0.41191,0.3296,0.31143,0.33197,0.29  
316,0.19752,0.26433,0.16058,0.15031,0.19243,0.20868,0.21659,0.21006,0.  
20459,0.19056,0.21821,0.20781,0.16905,0.1716,0.13285,0.127,0.11514,0.1  
4951,0.13698,0.12787,0.13381,0.12257,0.12181,0.12778,0.13655,0.11922,0  
.13322,0.14202,0.12653,0.12706,0.13502,0.13218,0.43976,0.32191,0.3057,  
0.34112,0.38731,0.23734,0.20174,0.21247,0.3075,0.18659,0.22969,0.20012  
,0.18568,0.22187,0.17745,0.18255,0.189,0.19147,0.22488,0.22765,0.13105  
,0.13442,0.1368,0.14364,0.1432,0.12751,0.14537,0.12741,0.12482,0.12651  
,0.13069,0.1432,0.11491,0.13133,0.12752,0.11745,0.12199,0.13189,0.3435  
,0.33315,0.35971,0.28149,0.19023,0.1971,0.22321,0.20792,0.19082,0.2482  
7,0.19411,0.17091,0.15856,0.20776,0.24174,0.19498,0.19429,0.19493,0.24  
034,0.18989,0.11726,0.12381,0.12885,0.13048,0.12197,0.13251,0.1288,0.1  
4614,0.13612,0.11917,0.12513,0.129,0.12708,0.12297,0.11779,0.13937,0.1  
308,0.13606,0.34492,0.22718,0.18433,0.20677,0.22779,0.14912,0.19538,0.  
2723,0.19149,0.22241,0.19639,0.18242,0.28718,0.20461,0.20089,0.21939,0  
.2325,0.19849,0.18046,0.12652,0.13142,0.13193,0.12446,0.13175,0.13809,  
0.12352,0.13698,0.13801,0.13226,0.16321,0.12685,0.14663,0.13796,0.1282  
6,0.13689,0.13168,0.05536,0.19162,0.21072,0.22533,0.24065,0.28399,0.22  
37,0.11804,0.16013,0.17663,0.17315,0.21373,0.22659,0.25269,0.2166,0.18  
449,0.17796,0.20733,0.21431,0.2225,0.13166,0.13028,0.12198,0.14226,0.1  
2487,0.13117,0.13111,0.12961,0.12382,0.11761,0.13684,0.13476,0.12063,0  
.13495,0.13395,0.12227,0.13645,0.052695,0.2158,0.20405,0.19503,0.20152  
,0.22907,0.14138,0.22178,0.20845,0.15739,0.17091,0.21109,0.21237,0.201  
58,0.192,0.17989,0.219,0.19511,0.18992,0.12469,0.12976,0.12908,0.12575

,0.1116,0.12931,0.11928,0.12441,0.13274,0.13421,0.14877,0.13892,0.1253  
9,0.129,0.1291,0.12942,0.12329,0.12095,0.051825,0.20947,0.25163,0.1980  
7,0.16636,0.27079,0.19981,0.24393,0.138,0.17562,0.25226,0.22157,0.1667  
5,0.20358,0.21305,0.21536,0.23743,0.22836,0.20606,0.13215,0.11291,0.12  
707,0.11924,0.12223,0.13203,0.12702,0.13268,0.15931,0.13246,0.1296,0.1  
2007,0.12799,0.1283,0.12016,0.14001,0.14314,0.054746,0.055207,0.052814  
,0.16047,0.24347,0.19029,0.16924,0.20611,0.0985,0.18076,0.21209,0.1731  
5,0.17006,0.21925,0.20173,0.22705,0.2178,0.21079,0.11419,0.13071,0.127  
54,0.12804,0.12803,0.1313,0.13737,0.11177,0.1249,0.12652,0.11939,0.156  
59,0.13578,0.12453,0.1211,0.13059,0.1279,0.12313,0.053004,0.054021,0.0  
58112,0.056336,0.18936,0.21536,0.25275,0.26763,0.18114,0.24788,0.20312  
,0.20383,0.2507,0.19239,0.18641,0.20656,0.12767,0.12712,0.18477,0.1285  
1,0.14217,0.1319,0.12741,0.13042,0.12502,0.12104,0.14885,0.13649,0.130  
6,0.12065,0.14598,0.128,0.12248,0.13888,0.12869,0.11497,0.055367,0.050  
729,0.049484,0.050558,0.05297,0.053435,0.18754,0.17124,0.17034,0.18745  
,0.21857,0.1941,0.23386,0.21868,0.14076,0.13191,0.13284,0.1299,0.13189  
,0.1445,0.12802,0.12903,0.13462,0.12172,0.13177,0.10606,0.14379,0.1069  
9,0.133,0.13082,0.15086,0.13191,0.13042,0.12706,0.12817,0.13914,0.1046  
4,0.057782,0.054809,0.05611,0.05304,0.051937,0.047255,0.20846,0.20281,  
0.24147,0.20855,0.23894,0.054486,0.059017,0.13321,0.11192,0.11616,0.13  
329,0.12146,0.12516,0.11256,0.12067,0.13743,0.12663,0.12651,0.13389,0.  
12835,0.12463,0.12932,0.12627,0.13064,0.13886,0.13737,0.12344,0.10478,  
0.053049,0.050977,0.050181,0.057668,0.05005,0.047417,0.057782,0.051696  
,0.055194,0.054679,0.16504,0.20996,0.055603,0.053301,0.053061,0.051768  
,0.13765,0.1144,0.13418,0.12911,0.14431,0.1481,0.14105,0.12687,0.12911  
,0.12333,0.11776,0.12944,0.13301,0.13165,0.11524,0.10949,0.13431,0.131  
1,0.12726,0.05038,0.054801,0.055969,0.057665,0.054293,0.051608,0.05367  
2,0.0571,0.053801,0.051491,0.051714,0.054609,0.059125,0.052152,0.05483  
3,0.051832,0.05538,0.15554,0.13719,0.12302,0.13293,0.11555,0.13494,0.1  
2068,0.12985,0.11842,0.12252,0.12938,0.1258,0.12535,0.13536,0.13257,0.  
12501,0.056703,0.056435,0.060953,0.051398,0.052889,0.049595,0.052987,0  
.052806,0.054462,0.055957,0.052206,0.050995,0.055484,0.050312,0.054609  
,0.054098,0.050359,0.053636,0.055574,0.14268,0.12843,0.12589,0.13593,0  
.12348,0.11699,0.14058,0.11908,0.16825,0.13394,0.12857,0.12346,0.13768  
,0.053658,0.052942,0.054017,0.049745,0.058464,0.054122,0.048581,0.0579  
21,0.056385,0.058358,0.051805,0.051922,0.056164,0.056368,0.05348,0.055  
644,0.051579,0.053724,0.055617,0.052084,0.050977,0.13139,0.12934,0.130  
08,0.13547,0.1287,0.1283,0.13197,0.12825,0.14179,0.053351,0.051891,0.0  
56787,0.056609,0.054621,0.045441,0.05477,0.061064,0.056404,0.056471,0.  
052568,0.057089,0.052873,0.05418,0.052803,0.052645,0.055091,0.052061,0  
.05387,0.050878,0.057303,0.053294,0.051929,0.0534,0.056924,0.12415,0.1  
3299,0.125,0.12357,0.053241,0.053428,0.046083,0.055974,0.053218,0.0485  
72,0.053569,0.046652,0.058224,0.047542,0.050181,0.053024,0.053579,0.05  
3431,0.055444,0.053528,0.049474,0.054406,0.051071,0.055177,0.051297,0.  
05328,0.049648,0.057102,0.052153,0.052153,0.053716,0.049847,0.055693,0  
.048423,0.052692,0.056856,0.054724,0.054052,0.046889,0.055676,0.054493  
,0.050069,0.057338,0.055805,0.05528,0.05491,0.053459,0.045792,0.056763  
,0.054232,0.051332,0.054159,0.048091,0.052455,0.053738,0.054315,0.0568  
16,0.050822,0.055818,0.055994,0.053801,0.054421,0.051196,0.055797,0.05  
5728,0.054644,0.050327,0.050486,0.057644,0.056344,0.055013,0.052336,0.  
049633,0.05323,0.051047,0.057329,0.054463,0.050342,0.052002,0.050896,0  
.056056,0.056808,0.055786,0.051051,0.052283,0.053946,0.055022,0.055364



|         |         |         |         |         |         |
|---------|---------|---------|---------|---------|---------|
| 0       | 0       | 0       | 0       | 0       | 0       |
| 0       | 0       | 0       | 0       | 0       | 0       |
| 0       | 0       | 0       | 0       | 0       | 0       |
| 0       | 0       | 0       | 0       | 0       | 0       |
| 0       | 0       | 0       | 0       | 0       | 0       |
| 0       | 0       | 0       | 0       | 0       | 0       |
| 0       | 0       | 0       | 0       | 0       | 0       |
| 0       | 0       | 0       | 0       | 0       | 0       |
| 0       | 0       | 0       | 0.5     | 0.46419 | 0.44109 |
| 0       | 0       | 0       | 0       | 0       | 0       |
| 0       | 0       | 0       | 0       | 0       | 0       |
| 0       | 0       | 0       | 0       | 0       | 0       |
| 0       | 0       | 0       | 0       | 0       | 0       |
| 0       | 0       | 0       | 0       | 0       | 0       |
| 0.57237 | 0.45312 | 0.5     | 0.6107  | 0.56282 | 0.49425 |
| 0       | 0       | 0       | 0       | 0       | 0       |
| 0       | 0       | 0       | 0       | 0       | 0       |
| 0       | 0       | 0       | 0       | 0       | 0       |
| 0       | 0       | 0       | 0       | 0       | 0       |
| 0       | 0       | 0       | 0       | 0.55987 | 0.53749 |
| 0.5275  | 0.53043 | 0.53198 | 0.61494 | 0.5     | 0.47748 |
| 0.51258 | 0       | 0       | 0       | 0       | 0       |
| 0       | 0       | 0       | 0       | 0       | 0       |
| 0       | 0       | 0       | 0       | 0       | 0       |
| 0       | 0       | 0       | 0       | 0       | 0       |
| 0       | 0       | 0       | 0.54522 | 0.50819 | 0.48728 |
| 0.44735 | 0.43204 | 0.5     | 0.5     | 0.4573  | 0.48777 |
| 0.35764 | 0.52237 | 0.5     | 0       | 0       | 0       |
| 0       | 0       | 0       | 0       | 0       | 0       |
| 0       | 0       | 0       | 0       | 0       | 0       |
| 0       | 0       | 0       | 0       | 0       | 0       |
| 0       | 0.48282 | 0.48911 | 0.50532 | 0.50726 | 0.46558 |
| 0.5     | 0.3431  | 0.4977  | 0.39281 | 0.52896 | 0.53205 |
| 0.47302 | 0.47664 | 0.51891 | 0.41606 | 0       | 0       |
| 0       | 0       | 0       | 0       | 0       | 0       |
| 0       | 0       | 0       | 0       | 0       | 0       |
| 0       | 0       | 0       | 0       | 0       | 0       |
| 0.45679 | 0.44552 | 0.51086 | 0.4445  | 0.56508 | 0.47447 |
| 0.5     | 0.55228 | 0.48247 | 0.46033 | 0.50438 | 0.57074 |
| 0.33442 | 0.51616 | 0.46163 | 0.5436  | 0.5     | 0.52304 |
| 0       | 0       | 0       | 0       | 0       | 0       |
| 0       | 0       | 0       | 0       | 0       | 0.39567 |
| 0.35317 | 0.26352 | 0.3652  | 0.29742 | 0.33135 | 0.33622 |
| 0.29626 | 0.3532  | 0.5569  | 0.42652 | 0.61357 | 0.52928 |
| 0.5     | 0.49854 | 0.65245 | 0.51819 | 0.49771 | 0.5     |
| 0.47696 | 0.48808 | 0.54283 | 0.5126  | 0.5     | 0.54183 |
| 0.37323 | 0.43958 | 0       | 0       | 0       | 0       |
| 0       | 0       | 0       | 0       | 0       | 0.46595 |
| 0.37563 | 0.30888 | 0.27294 | 0.33333 | 0.33973 | 0.35098 |
| 0.26266 | 0.31161 | 0.35651 | 0.3624  | 0.44297 | 0.54435 |
| 0.47426 | 0.53168 | 0.47887 | 0.45128 | 0.40908 | 0.49321 |
| 0.53576 | 0.5907  | 0.50837 | 0.45413 | 0.54529 | 0.48219 |
| 0.47635 | 0.51303 | 0.52763 | 0.48439 | 0       | 0       |

|         |         |         |         |         |         |
|---------|---------|---------|---------|---------|---------|
| 0       | 0       | 0       | 0       | 0       | 0.5     |
| 0.54795 | 0.48903 | 0.42349 | 0.33333 | 0.29041 | 0.39718 |
| 0.36046 | 0.33333 | 0.26573 | 0.33333 | 0.37923 | 0.36231 |
| 0.56881 | 0.5     | 0.5046  | 0.47784 | 0.44472 | 0.5     |
| 0.77894 | 0.49857 | 0.43177 | 0.5     | 0.5     | 0.55746 |
| 0.51082 | 0.54066 | 0.44008 | 0.49498 | 0.5     | 0.52599 |
| 0       | 0       | 0       | 0       | 0       | 0       |
| 0.5     | 0.46109 | 0.45548 | 0.51307 | 0.50249 | 0.3821  |
| 0.33333 | 0.34668 | 0.34225 | 0.24452 | 0.38733 | 0.30251 |
| 0.30335 | 0.30639 | 0.38114 | 0.5     | 0.5     | 0.5671  |
| 0.5614  | 0.46513 | 0.46085 | 0.54258 | 0.50066 | 0.5     |
| 0.5     | 0.5     | 0.51582 | 0.49734 | 0.49008 | 0.45883 |
| 0.36315 | 0.43041 | 0       | 0       | 0       | 0       |
| 0       | 0.586   | 0.52933 | 0.53191 | 0.46629 | 0.5     |
| 0.53966 | 0.33333 | 0.36608 | 0.37874 | 0.33333 | 0.36011 |
| 0.38862 | 0.31877 | 0.37906 | 0.3337  | 0.5     | 0.5     |
| 0.53753 | 0.54789 | 0.50224 | 0.5     | 0.41734 | 0.57341 |
| 0.41473 | 0.48123 | 0.5     | 0.5     | 0.53538 | 0.5     |
| 0.5     | 0.5     | 0.46942 | 0.45638 | 0       | 0       |
| 0       | 0.3408  | 0.52564 | 0.34637 | 0.48836 | 0.50422 |
| 0.5     | 0.54671 | 0.47777 | 0.29169 | 0.28981 | 0.38355 |
| 0.29806 | 0.34593 | 0.24734 | 0.29512 | 0.33333 | 0.15593 |
| 0.46251 | 0.49961 | 0.45718 | 0.49541 | 0.5     | 0.39931 |
| 0.47744 | 0.51198 | 0.43345 | 0.58256 | 0.42296 | 0.4838  |
| 0.45135 | 0.5719  | 0.38409 | 0.46578 | 0.49407 | 0.5     |
| 0       | 0.5     | 0.54308 | 0.526   | 0.47113 | 0.45047 |
| 0.5     | 0.54049 | 0.47277 | 0.44198 | 0.33333 | 0.33432 |
| 0.35727 | 0.33333 | 0.31557 | 0.35886 | 0.37778 | 0.3827  |
| 0.31894 | 0.4859  | 0.50018 | 0.58121 | 0.45933 | 0.5     |
| 0.5     | 0.46612 | 0.5     | 0.56707 | 0.4726  | 0.52817 |
| 0.5051  | 0.47764 | 0.46196 | 0.5012  | 0.55713 | 0.45355 |
| 1       | 0.53664 | 0.5     | 0.61545 | 0.5     | 0.5     |
| 0.45007 | 0.55576 | 0.45612 | 0.5     | 0.55842 | 0.33333 |
| 0.34034 | 0.34984 | 0.33333 | 0.37896 | 0.31821 | 0.20974 |
| 0.33333 | 0.37706 | 0.55997 | 0.5     | 0.5     | 0.54886 |
| 0.5     | 0.48411 | 0.52083 | 0.5     | 0.49763 | 0.5     |
| 0.5     | 0.61181 | 0.50862 | 0.5     | 0.53636 | 0.58292 |
| 0.5     | 1       | 0.51719 | 0.49308 | 0.54026 | 0.74727 |
| 0.48526 | 0.49306 | 0.47833 | 0.45067 | 0.43982 | 0.5     |
| 0.26715 | 0.29551 | 0.3514  | 0.28263 | 0.40636 | 0.28872 |
| 0.34667 | 0.36623 | 0.5     | 0.5     | 0.52414 | 0.5     |
| 0.47129 | 0.48515 | 0.51212 | 0.42948 | 0.55411 | 0.60195 |
| 0.67231 | 0.5     | 0.53693 | 0.4876  | 0.57651 | 0.58677 |
| 0.53523 | 0.44857 | 1       | 0.45766 | 0.5     | 0.5     |
| 0.5121  | 0.49815 | 0.5     | 0.45705 | 0.5     | 0.6064  |
| 0.46966 | 0.22332 | 0.33333 | 0.31261 | 0.43138 | 0.24969 |
| 0.33716 | 0.37152 | 0.27781 | 0.47331 | 0.48962 | 0.49155 |
| 0.51861 | 0.46612 | 0.45529 | 0.44889 | 0.52749 | 0.5     |
| 0.43212 | 0.65371 | 0.47712 | 0.63036 | 0.46791 | 0.51271 |
| 0.57609 | 0.49191 | 1       | 1       | 1       | 0.53693 |
| 0.39841 | 0.51861 | 0.5     | 0.5595  | 0.51833 | 0.62264 |
| 0.54384 | 0.47819 | 0.20831 | 0.36313 | 0.33708 | 0.38041 |

|         |         |         |         |         |         |
|---------|---------|---------|---------|---------|---------|
| 0.33387 | 0.33333 | 0.41659 | 0.50173 | 0.5     | 0.51262 |
| 0.61037 | 0.44634 | 0.5     | 0.45632 | 0.53512 | 0.46048 |
| 0.51422 | 0.51906 | 0.5     | 0.40747 | 0.42797 | 0.5     |
| 0.43891 | 0.5     | 1       | 1       | 1       | 1       |
| 0.47567 | 0.5     | 0.5     | 0.84311 | 0.49588 | 0.49144 |
| 0.64584 | 0.42946 | 0.5     | 0.33366 | 0.3725  | 0.35091 |
| 0.44014 | 0.59622 | 0.54759 | 0.5     | 0.5     | 0.38955 |
| 0.52752 | 0.54885 | 0.48965 | 0.4922  | 0.38561 | 0.46161 |
| 0.49797 | 0.49002 | 0.59364 | 0.46544 | 0.5     | 0.49065 |
| 0.42516 | 0.47575 | 1       | 1       | 1       | 1       |
| 1       | 1       | 0.5     | 0.46797 | 0.55551 | 0.65424 |
| 0.46431 | 0.45101 | 0.5     | 0.59185 | 0.46186 | 0.62586 |
| 0.44945 | 0.48025 | 0.5     | 0.36218 | 0.5     | 0.55334 |
| 0.47386 | 0.5     | 0.51404 | 0.5     | 0.48939 | 0.55445 |
| 0.50691 | 0.477   | 0.54685 | 0.5     | 0.31342 | 0.5     |
| 0.48346 | 0.5     | 0.46605 | 1       | 1       | 1       |
| 1       | 1       | 1       | 0.5     | 0.44741 | 0.6825  |
| 0.55499 | 0.46519 | 1       | 1       | 0.47109 | 0.5532  |
| 0.37752 | 0.5     | 0.49338 | 0.5     | 0.5     | 0.46737 |
| 0.48254 | 0.5     | 0.51301 | 0.49024 | 0.63159 | 0.577   |
| 0.5     | 0.36781 | 0.4133  | 0.43581 | 0.5     | 0.45245 |
| 0.57755 | 1       | 1       | 1       | 1       | 1       |
| 1       | 1       | 1       | 1       | 1       | 0.5     |
| 0.47606 | 1       | 1       | 1       | 1       | 0.52174 |
| 0.47929 | 0.46001 | 0.34787 | 0.53051 | 0.53335 | 0.44323 |
| 0.46528 | 0.57027 | 0.5     | 0.64367 | 0.43558 | 0.47677 |
| 0.50262 | 0.37202 | 0.5     | 0.5     | 0.5     | 0.5     |
| 1       | 1       | 1       | 1       | 1       | 1       |
| 1       | 1       | 1       | 1       | 1       | 1       |
| 1       | 1       | 1       | 1       | 1       | 0.5     |
| 0.5     | 0.48868 | 0.42127 | 0.56426 | 0.5     | 0.30995 |
| 0.5     | 0.49586 | 0.54744 | 0.47493 | 0.5     | 0.57004 |
| 0.48379 | 0.5189  | 0.51258 | 1       | 1       | 1       |
| 1       | 1       | 1       | 1       | 1       | 1       |
| 1       | 1       | 1       | 1       | 1       | 1       |
| 1       | 1       | 1       | 1       | 0.62345 | 0.5     |
| 0.50565 | 0.47326 | 0.47634 | 0.5     | 0.45789 | 0.52789 |
| 0.5     | 0.54316 | 0.5     | 0.52434 | 0.49675 | 1       |
| 1       | 1       | 1       | 1       | 1       | 1       |
| 1       | 1       | 1       | 1       | 1       | 1       |
| 1       | 1       | 1       | 1       | 1       | 1       |
| 1       | 1       | 0.44342 | 0.54371 | 0.50459 | 0.52179 |
| 0.57367 | 0.43134 | 0.38057 | 0.42482 | 0.5     | 1       |
| 1       | 1       | 1       | 1       | 1       | 1       |
| 1       | 1       | 1       | 1       | 1       | 1       |
| 1       | 1       | 1       | 1       | 1       | 1       |
| 1       | 1       | 1       | 1       | 1       | 1       |
| 0.54583 | 0.5     | 0.63539 | 0.55631 | 1       | 1       |
| 1       | 1       | 1       | 1       | 1       | 1       |
| 1       | 1       | 1       | 1       | 1       | 1       |
| 1       | 1       | 1       | 1       | 1       | 1       |
| 1       | 1       | 1       | 1       | 1       | 1       |



|         |         |         |         |         |         |         |
|---------|---------|---------|---------|---------|---------|---------|
| 1       | 1       | 1       | 1       | 1       | 1       | 1       |
| 0       | 0       | 0       | 0       | 0       | 0       | 0       |
| 0.46265 | 0.4102  |         | 0.5     | 0.53127 | 0.5     | 0.49064 |
| 0.47921 | 0.4974  |         | 0.5     | 0.5     | 1       | 1       |
| 1       | 1       | 1       | 1       | 1       | 1       | 1       |
| 1       | 1       | 1       | 1       | 1       | 1       | 1       |
| 1       | 1       | 1       | 0       | 0       | 0       | 0       |
| 0       | 0       | 0       | 0.44415 | 0.23125 | 0.52448 |         |
| 0.60108 | 0.53948 | 0.47094 |         | 0.5231  | 0.5     | 0.5     |
| 0.45245 | 0.42415 |         | 1       | 1       | 1       | 1       |
| 1       | 1       | 1       | 1       | 1       | 1       | 1       |
| 1       | 1       | 1       | 0.5     | 0.53581 | 0.55891 |         |
| 1       | 0       | 0       | 0       | 0       | 0       | 0       |
| 0       | 0       | 0.5     | 0.49836 | 0.50877 | 0.44977 |         |
| 0.5     | 0.5     | 0.5323  | 0.52512 | 0.4852  | 0.55776 |         |
| 0.59705 |         | 1       | 1       | 1       | 1       | 1       |
| 1       | 1       | 1       | 1       | 1       | 1       | 1       |
| 0.42763 | 0.54688 |         | 0.5     | 0.3893  | 0.43718 | 0.50575 |
| 1       | 0       | 0       | 0       | 0       | 0       | 0       |
| 0       | 0       | 0.48412 | 0.56829 | 0.46183 | 0.67387 |         |
| 0.53788 |         | 0.5     | 0.51805 | 0.39711 | 0.58892 | 0.5     |
| 0.53768 |         | 1       | 1       | 1       | 1       | 1       |
| 1       | 1       | 1       | 1       | 0.44013 | 0.46251 |         |
| 0.4725  | 0.46957 | 0.46802 | 0.38506 |         | 0.5     | 0.52252 |
| 0.48742 |         | 1       | 0       | 0       | 0       | 0       |
| 0       | 0       | 0       | 0.5     | 0.48134 | 0.50312 |         |
| 0.54863 | 0.54029 | 0.51931 | 0.55294 | 0.39475 |         | 0.5     |
| 0.5     | 0.5     | 0.5     | 1       | 1       | 1       | 1       |
| 1       | 1       | 1       | 0.45478 | 0.49181 | 0.51272 |         |
| 0.55265 | 0.56796 |         | 0.5     | 0.5     | 0.5427  | 0.51223 |
| 0.64236 | 0.47763 |         | 0.5     | 0       | 0       | 0       |
| 0       | 0       | 0       | 0       | 0.5     | 0.49901 |         |
| 0.48742 | 0.53057 | 0.48743 | 0.43946 | 0.55948 |         | 0.5     |
| 0.62499 | 0.48424 | 0.57133 | 0.44045 |         | 1       | 1       |
| 1       | 0.51718 | 0.51089 | 0.49468 | 0.49274 | 0.53442 |         |
| 0.5     | 0.6569  | 0.5023  | 0.60719 | 0.47104 | 0.46795 |         |
| 0.52698 | 0.52336 | 0.48109 | 0.58394 |         | 0       | 0       |
| 0       | 0       | 0       | 0       | 0       | 0       | 0       |
| 0       | 0.43408 | 0.48348 | 0.5     | 0.5     | 0.49483 |         |
| 0.54473 |         | 0.5     | 0.46552 | 0.5     | 0.50699 | 0.60622 |
| 0.54321 | 0.55448 | 0.48914 |         | 0.5555  | 0.43492 | 0.52553 |
| 0.5     | 0.44772 | 0.51753 | 0.53967 | 0.49562 | 0.42926 |         |
| 0.66558 | 0.48384 | 0.53837 | 0.4564  |         | 0.5     | 0.47696 |
| 0       | 0       | 0       | 0       | 0       | 0       | 0       |
| 0       | 0       | 0       | 0.5     | 0.51979 | 0.39567 |         |
| 0.33442 | 0.36824 | 0.36618 | 0.35129 | 0.29588 | 0.33622 |         |
| 0.347   | 0.29361 | 0.4431  | 0.57348 | 0.38643 | 0.47072 |         |
| 0.5     | 0.50146 | 0.34755 | 0.48181 | 0.50229 | 0.5     |         |
| 0.52304 | 0.51192 | 0.45717 | 0.4874  |         | 0.5     | 0.45817 |
| 0.62677 | 0.56042 |         | 0       | 0       | 0       | 0       |
| 0       | 0       | 0       | 0       | 0       | 0       | 0       |
| 0.24874 | 0.38325 | 0.32818 | 0.33333 | 0.33973 | 0.36478 |         |



|         |         |         |         |         |         |
|---------|---------|---------|---------|---------|---------|
| 0.36867 | 0.37508 | 0.28697 | 0.2895  | 0.55703 | 0.45565 |
| 0.52574 | 0.46832 | 0.52113 | 0.54872 | 0.59092 | 0.50679 |
| 0.46424 | 0.4093  | 0.49163 | 0.54587 | 0.45471 | 0.51781 |
| 0.52365 | 0.48697 | 0.47237 | 0.51561 | 0       | 0       |
| 0       | 0       | 0       | 0       | 0       | 0       |
| 0       | 0       | 0.15302 | 0.33333 | 0.387   | 0.27261 |
| 0.27909 | 0.33333 | 0.39387 | 0.33333 | 0.39137 | 0.27537 |
| 0.43119 | 0.5     | 0.4954  | 0.52216 | 0.55528 | 0.5     |
| 0.22106 | 0.50143 | 0.56823 | 0.5     | 0.5     | 0.44254 |
| 0.48918 | 0.45934 | 0.55992 | 0.50502 | 0.5     | 0.47401 |
| 0       | 0       | 0       | 0       | 0       | 0       |
| 0       | 0       | 0       | 0       | 0       | 0.27486 |
| 0.33333 | 0.30664 | 0.34225 | 0.43766 | 0.38733 | 0.36531 |
| 0.34832 | 0.36041 | 0.61886 | 0.5     | 0.5     | 0.4329  |
| 0.4386  | 0.53487 | 0.53915 | 0.45742 | 0.49934 | 0.5     |
| 0.5     | 0.5     | 0.48418 | 0.50266 | 0.50992 | 0.54117 |
| 0.63685 | 0.56959 | 0       | 0       | 0       | 0       |
| 0       | 0       | 0       | 0       | 0       | 0       |
| 0       | 0.33333 | 0.36608 | 0.23173 | 0.33333 | 0.36594 |
| 0.29735 | 0.34061 | 0.28463 | 0.3326  | 0.5     | 0.5     |
| 0.46247 | 0.45211 | 0.49776 | 0.5     | 0.58266 | 0.42659 |
| 0.58527 | 0.51877 | 0.5     | 0.5     | 0.46462 | 0.5     |
| 0.5     | 0.5     | 0.53058 | 0.54362 | 0       | 0       |
| 0       | 0       | 0       | 0       | 0       | 0       |
| 0       | 0       | 0       | 0.32815 | 0.3551  | 0.26271 |
| 0.35527 | 0.30814 | 0.35348 | 0.34597 | 0.33333 | 0.42203 |
| 0.53749 | 0.50039 | 0.54282 | 0.50459 | 0.5     | 0.60069 |
| 0.52256 | 0.48802 | 0.56655 | 0.41744 | 0.57704 | 0.5162  |
| 0.54865 | 0.4281  | 0.61591 | 0.53422 | 0.50593 | 0.5     |
| 0       | 0       | 0       | 0       | 0       | 0       |
| 0       | 0       | 0       | 0       | 0.33333 | 0.31185 |
| 0.28546 | 0.33333 | 0.27813 | 0.35886 | 0.37207 | 0.26847 |
| 0.34511 | 0.5141  | 0.49982 | 0.41879 | 0.54067 | 0.5     |
| 0.5     | 0.53388 | 0.5     | 0.43293 | 0.5274  | 0.47183 |
| 0.4949  | 0.52236 | 0.53804 | 0.4988  | 0.44287 | 0.54645 |
| 0       | 0       | 0       | 0       | 0       | 0       |
| 0       | 0       | 0       | 0       | 0       | 0.33333 |
| 0.31961 | 0.33934 | 0.33333 | 0.37896 | 0.3409  | 0.39513 |
| 0.33333 | 0.29322 | 0.44003 | 0.5     | 0.5     | 0.45114 |
| 0.5     | 0.51589 | 0.47917 | 0.5     | 0.50237 | 0.5     |
| 0.5     | 0.38819 | 0.49138 | 0.5     | 0.46364 | 0.41708 |
| 0.5     | 0       | 0       | 0       | 0       | 0       |
| 0       | 0       | 0       | 0       | 0       | 0       |
| 0.38705 | 0.35225 | 0.3514  | 0.35868 | 0.31854 | 0.35625 |
| 0.34667 | 0.26755 | 0.5     | 0.5     | 0.47586 | 0.5     |
| 0.52871 | 0.51485 | 0.48788 | 0.57052 | 0.44589 | 0.39805 |
| 0.32769 | 0.5     | 0.46307 | 0.5124  | 0.42349 | 0.41323 |
| 0.46477 | 0.55143 | 0       | 0       | 0       | 0       |
| 0       | 0       | 0       | 0       | 0       | 0       |
| 0       | 0.38834 | 0.33333 | 0.38318 | 0.26459 | 0.35173 |
| 0.32569 | 0.37323 | 0.33053 | 0.52669 | 0.51038 | 0.50845 |
| 0.48139 | 0.53388 | 0.54471 | 0.55111 | 0.47251 | 0.5     |

|         |         |         |         |         |         |
|---------|---------|---------|---------|---------|---------|
| 0.56788 | 0.34629 | 0.52288 | 0.36964 | 0.53209 | 0.48729 |
| 0.42391 | 0.50809 | 0       | 0       | 0       | 0       |
| 0       | 0       | 0       | 0       | 0       | 0       |
| 0       | 0       | 0.39315 | 0.36313 | 0.21436 | 0.20968 |
| 0.3232  | 0.33333 | 0.58341 | 0.49827 | 0.5     | 0.48738 |
| 0.38963 | 0.55366 | 0.5     | 0.54368 | 0.46488 | 0.53952 |
| 0.48578 | 0.48094 | 0.5     | 0.59253 | 0.57203 | 0.5     |
| 0.56109 | 0.5     | 0       | 0       | 0       | 0       |
| 0       | 0       | 0       | 0       | 0       | 0       |
| 0       | 0       | 0       | 0.33268 | 0.28038 | 0.32367 |
| 0.55986 | 0.40378 | 0.45241 | 0.5     | 0.5     | 0.61045 |
| 0.47248 | 0.45115 | 0.51035 | 0.5078  | 0.61439 | 0.53839 |
| 0.50203 | 0.50998 | 0.40636 | 0.53456 | 0.5     | 0.50935 |
| 0.57484 | 0.52425 | 0       | 0       | 0       | 0       |
| 0       | 0       | 0       | 0       | 0       | 0       |
| 0       | 0       | 0       | 0       | 0.53814 | 0.37414 |
| 0.55055 | 0.51975 | 0.5     | 0.63782 | 0.5     | 0.44666 |
| 0.52614 | 0.5     | 0.48596 | 0.5     | 0.51061 | 0.44555 |
| 0.49309 | 0.523   | 0.45315 | 0.5     | 0.68658 | 0.5     |
| 0.51654 | 0.5     | 0.53395 | 0       | 0       | 0       |
| 0       | 0       | 0       | 0       | 0       | 0       |
| 0       | 0       | 0       | 0       | 0.52891 | 0.4468  |
| 0.62248 | 0.5     | 0.50662 | 0.5     | 0.5     | 0.53263 |
| 0.51746 | 0.5     | 0.48699 | 0.50976 | 0.36841 | 0.423   |
| 0.5     | 0.63219 | 0.5867  | 0.56419 | 0.5     | 0.54755 |
| 0.42245 | 0       | 0       | 0       | 0       | 0       |
| 0       | 0       | 0       | 0       | 0       | 0       |
| 0       | 0       | 0       | 0       | 0       | 0.47826 |
| 0.52071 | 0.53999 | 0.65213 | 0.46949 | 0.46665 | 0.55677 |
| 0.53472 | 0.42973 | 0.5     | 0.35633 | 0.56442 | 0.52323 |
| 0.49738 | 0.62798 | 0.5     | 0.5     | 0.5     | 0.5     |
| 0       | 0       | 0       | 0       | 0       | 0       |
| 0       | 0       | 0       | 0       | 0       | 0       |
| 0       | 0       | 0       | 0       | 0       | 0.5     |
| 0.5     | 0.51132 | 0.57873 | 0.43574 | 0.5     | 0.69005 |
| 0.5     | 0.50414 | 0.45256 | 0.52507 | 0.5     | 0.42996 |
| 0.51621 | 0.4811  | 0.48742 | 0       | 0       | 0       |
| 0       | 0       | 0       | 0       | 0       | 0       |
| 0       | 0       | 0       | 0       | 0       | 0       |
| 0       | 0       | 0       | 0       | 0.37655 | 0.5     |
| 0.49435 | 0.52674 | 0.52366 | 0.5     | 0.54211 | 0.47211 |
| 0.5     | 0.45684 | 0.5     | 0.47566 | 0.50325 | 0       |
| 0       | 0       | 0       | 0       | 0       | 0       |
| 0       | 0       | 0       | 0       | 0       | 0       |
| 0       | 0       | 0       | 0       | 0       | 0       |
| 0       | 0       | 0.55658 | 0.45629 | 0.49541 | 0.47821 |
| 0.42633 | 0.56866 | 0.61943 | 0.57518 | 0.5     | 0       |
| 0       | 0       | 0       | 0       | 0       | 0       |
| 0       | 0       | 0       | 0       | 0       | 0       |
| 0       | 0       | 0       | 0       | 0       | 0       |
| 0       | 0       | 0       | 0       | 0       | 0       |
| 0.45417 | 0.5     | 0.36461 | 0.44369 | 0       | 0       |





|         |         |         |         |         |         |
|---------|---------|---------|---------|---------|---------|
| 0       | 0       | 0       | 0       | 0       | 0       |
| 0       | 0       | 1       | 1       | 1       | 1       |
| 1       | 1       | 1       | 1       | 1       | 0.53405 |
| 0.37563 | 0.30787 | 0.39888 | 0.33333 | 0.32053 | 0.28425 |
| 0.36867 | 0.31331 | 0.35651 | 0.3481  | 0       | 0       |
| 0       | 0       | 0       | 0       | 0       | 0       |
| 0       | 0       | 0       | 0       | 0       | 0       |
| 0       | 0       | 0       | 0       | 1       | 1       |
| 1       | 1       | 1       | 1       | 1       | 0.5     |
| 0.45205 | 0.51097 | 0.42349 | 0.33333 | 0.32259 | 0.33021 |
| 0.36046 | 0.33333 | 0.3404  | 0.33333 | 0.2294  | 0.36231 |
| 0       | 0       | 0       | 0       | 0       | 0       |
| 0       | 0       | 0       | 0       | 0       | 0       |
| 0       | 0       | 0       | 0       | 0       | 0       |
| 1       | 1       | 1       | 1       | 1       | 1       |
| 0.5     | 0.53891 | 0.54452 | 0.48693 | 0.49751 | 0.34303 |
| 0.33333 | 0.34668 | 0.31551 | 0.31782 | 0.22534 | 0.33219 |
| 0.34832 | 0.3332  | 0       | 0       | 0       | 0       |
| 0       | 0       | 0       | 0       | 0       | 0       |
| 0       | 0       | 0       | 0       | 0       | 0       |
| 0       | 0       | 1       | 1       | 1       | 1       |
| 1       | 0.414   | 0.47067 | 0.46809 | 0.53371 | 0.5     |
| 0.46034 | 0.33333 | 0.26784 | 0.38953 | 0.33333 | 0.27395 |
| 0.31402 | 0.34061 | 0.33631 | 0.3337  | 0       | 0       |
| 0       | 0       | 0       | 0       | 0       | 0       |
| 0       | 0       | 0       | 0       | 0       | 0       |
| 0       | 0       | 0       | 0       | 1       | 1       |
| 1       | 0.6592  | 0.47436 | 0.65363 | 0.51164 | 0.49578 |
| 0.5     | 0.45329 | 0.52223 | 0.38016 | 0.3551  | 0.35375 |
| 0.34667 | 0.34593 | 0.39918 | 0.35892 | 0.33333 | 0.42203 |
| 0       | 0       | 0       | 0       | 0       | 0       |
| 0       | 0       | 0       | 0       | 0       | 0       |
| 0       | 0       | 0       | 0       | 0       | 0       |
| 1       | 0.5     | 0.45692 | 0.474   | 0.52887 | 0.54953 |
| 0.5     | 0.45951 | 0.52723 | 0.55802 | 0.33333 | 0.35383 |
| 0.35727 | 0.33333 | 0.40631 | 0.28229 | 0.25016 | 0.34883 |
| 0.33595 | 0       | 0       | 0       | 0       | 0       |
| 0       | 0       | 0       | 0       | 0       | 0       |
| 0       | 0       | 0       | 0       | 0       | 0       |
| 0       | 0.46336 | 0.5     | 0.38455 | 0.5     | 0.5     |
| 0.54993 | 0.44424 | 0.54388 | 0.5     | 0.44158 | 0.33333 |
| 0.34005 | 0.31082 | 0.33333 | 0.24207 | 0.3409  | 0.39513 |
| 0.33333 | 0.32972 | 0       | 0       | 0       | 0       |
| 0       | 0       | 0       | 0       | 0       | 0       |
| 0       | 0       | 0       | 0       | 0       | 0       |
| 0       | 0       | 0.48281 | 0.50692 | 0.45974 | 0.25273 |
| 0.51474 | 0.50694 | 0.52167 | 0.54933 | 0.56018 | 0.5     |
| 0.34581 | 0.35225 | 0.29721 | 0.35868 | 0.2751  | 0.35503 |
| 0.30666 | 0.36623 | 0       | 0       | 0       | 0       |
| 0       | 0       | 0       | 0       | 0       | 0       |
| 0       | 0       | 0       | 0       | 0       | 0       |
| 0       | 0       | 0       | 0.54234 | 0.5     | 0.5     |



|   |   |   |   |   |   |
|---|---|---|---|---|---|
| 0 | 0 | 0 | 0 | 0 | 0 |
| 0 | 0 | 0 | 0 | 0 | 0 |
| 0 | 0 | 0 | 0 | 0 | 0 |
| 0 | 0 | 0 | 0 | 0 | 0 |
| 0 | 0 | 0 | 0 | 0 | 0 |
| 0 | 0 | 0 | 0 | 0 | 0 |
| 0 | 0 | 0 | 0 | 0 | 0 |
| 0 | 0 | 0 | 0 | 0 | 0 |
| 0 | 0 | 0 | 0 | 0 | 0 |
| 0 | 0 | 0 | 0 | 0 | 0 |
| 0 | 0 | 0 | 0 | 0 | 0 |
| 0 | 0 | 0 | 0 | 0 | 0 |
| 0 | 0 | 0 | 0 | 0 | 0 |
| 0 | 0 | 0 | 0 | 0 | 0 |
| 0 | 0 | 0 | 0 | 0 | 0 |
| 0 | 0 | 0 | 0 | 0 | 0 |
| 0 | 0 | 0 | 0 | 0 | 0 |
| 0 | 0 | 0 | 0 | 0 | 0 |
| 0 | 0 | 0 | 0 | 0 | 0 |
| 0 | 0 | 0 | 0 | 0 | 0 |
| 0 | 0 | 0 | 0 | 0 | 0 |
| 0 | 0 | 0 | 0 | 0 | 0 |
| 0 | 0 | 0 | 0 | 0 | 0 |
| 0 | 0 | 0 | 0 | 0 | 0 |
| 0 | 0 | 0 | 0 | 0 | 0 |
| 0 | 0 | 0 | 0 | 0 | 0 |
| 0 | 0 | 0 | 0 | 0 | 0 |
| 0 | 0 | 0 | 0 | 0 | 0 |
| 0 | 0 | 0 | 0 | 0 | 0 |
| 0 | 0 | 0 | 0 | 0 | 0 |
| 0 | 0 | 0 | 0 | 0 | 0 |
| 0 | 0 | 0 | 0 | 0 | 0 |
| 0 | 0 | 0 | 0 | 0 | 0 |
| 0 | 0 | 0 | 0 | 0 | 0 |
| 0 | 0 | 0 | 0 | 0 | 0 |
| 0 | 0 | 0 | 0 | 0 | 0 |
| 0 | 0 | 0 | 0 | 0 | 0 |
| 0 | 0 | 0 | 0 | 0 | 0 |
| 0 | 0 | 0 | 0 | 0 | 0 |
| 0 | 0 | 0 | 0 | 0 | 0 |
| 0 | 0 | 0 | 0 | 0 | 0 |
| 0 | 0 | 0 | 0 | 0 | 0 |
| 0 | 0 | 0 | 0 | 0 | 0 |
| 0 | 0 | 0 | 0 | 0 | 0 |

gtTCf=

- 0
- 0.07155
- 0.10366
- 0.11432
- 0.11389
- 0.10824
- 0.10059
- 0.092638
- 0.085208
- 0.078648
- 0.073046
- 0.06836
- 0.06449

0.06132  
0.058731  
0.05662  
0.054894  
0.053478

gtTCs=

0  
0.07155  
0.116  
0.14393  
0.16177  
0.17342  
0.18126  
0.18671  
0.19067  
0.19366  
0.19601  
0.19792  
0.19952  
0.20088  
0.20206  
0.20309  
0.20398  
0.20476

gtTCp=

0  
2.385  
1.5979  
1.1196  
0.8287  
0.65143  
0.54309  
0.47655  
0.43538  
0.4096  
0.39316  
0.38239  
0.37506  
0.36982  
0.36585  
0.36266  
0.35995  
0.35753

X\_mask=

2.2204e-016,0.00015702,0.0026107,2.2204e-016,1.041e-  
005,0.00055343,2.2204e-016,2.2204e-016,0.0017086,2.2204e-016,9.2897e-  
005,2.2204e-016,2.2204e-016,0.00075279,2.2204e-016,2.2204e-  
016,2.2204e-016,0.0030329,0.001438,2.2204e-016,0.017955,2.2204e-  
016,2.2204e-016,2.2204e-016,2.2204e-016,0.00041569,2.2204e-



016,2.2204e-016,2.2204e-016,0.00013707,0.00015742,0.0014064,2.2204e-  
016,2.2204e-016,0.0017082,0.0018947,0.0014796,2.2204e-  
016,0.00060087,2.2204e-016,2.2204e-016,0.01241,0.0015053,2.2204e-  
016,0.0024267,0.0069177,2.2204e-016,0.00036427,2.2204e-016,2.2204e-  
016,0.0012304,0.00060621,2.2204e-016,2.2204e-016,2.2204e-  
016,0.0010119,0.0011917,0.0014705,2.2204e-  
016,0.0024831,0.00036703,8.2919e-005,0.017603,0.0039722,2.2204e-  
016,2.2204e-016,0.0071468,2.2204e-016,0.0081691,0.0054022,2.2204e-  
016,2.2204e-016,2.2204e-016,2.2204e-016,2.2204e-016,2.2204e-  
016,2.2204e-016,0.0017635,0.0015307,2.2204e-016,2.2204e-016,2.2204e-  
016,2.2204e-016,2.2204e-016,2.2204e-016,2.2204e-  
016,0.017143,0.01626,2.2204e-016,0.0028764,0.0027075,2.2204e-  
016,0.001553,2.2204e-016,0.003553,0.0038841,2.2204e-  
016,0.0028385,0.0019088,0.0011269,0.00093725,0.0021512,2.2204e-  
016,0.0013659,0.0004513,0.0019933,2.2204e-016,0.00012626,2.2204e-  
016,2.2204e-016,0.0011422,0.00022948,2.2204e-016,2.2204e-  
016,0.013853,2.2204e-016,2.2204e-016,0.021168,2.2204e-016,2.2204e-  
016,0.016518,0.013773,0.0012378,0.0097199,2.2204e-  
016,0.011788,0.010204,2.2204e-016,2.2204e-016,0.00031706,2.2204e-  
016,0.00085738,0.00092517,2.2204e-016,0.0021448,2.2204e-016,2.2204e-  
016,0.0019308,0.0025147,0.00014086,0.0008253,2.2204e-  
016,0.0017765,2.2204e-016,2.2204e-  
016,0.005148,0.0017275,0.012357,0.00095341,2.2204e-016,2.2204e-  
016,2.2204e-016,2.2204e-016,2.2204e-016,2.2204e-016,2.2204e-  
016,0.008764,0.021862,2.2204e-016,0.00065806,2.2204e-  
016,0.0015886,2.2204e-016,2.2204e-016,0.0019515,2.2204e-016,2.2204e-  
016,0.00079658,2.2204e-016,0.001504,0.0038716,2.2204e-  
016,0.0051929,2.2204e-016,0.0012565,0.0014676,2.2204e-016,2.2204e-  
016,0.0066957,0.027714,0.009024,0.0050441,2.2204e-  
016,0.0044853,0.001361,0.0074919,0.0031899,2.2204e-016,2.2204e-  
016,2.2204e-016,2.2204e-016,2.2204e-  
016,0.0035414,0.011366,0.0010373,0.00031317,0.0019048,2.2204e-  
016,0.001453,0.00039701,2.2204e-016,0.0013322,0.0014486,2.2204e-  
016,2.2204e-016,2.2204e-016,2.2204e-  
016,0.000849,0.0013045,0.00074011,0.0016548,2.2204e-  
016,0.0099232,0.0030652,0.0065567,2.2204e-  
016,0.012622,0.0041976,2.2204e-  
016,0.0020932,0.013314,0.013058,0.012155,2.2204e-  
016,0.0023897,0.0013796,0.0026749,0.0059669,2.2204e-016,2.2204e-  
016,2.2204e-016,0.00054102,2.2204e-016,2.2204e-  
016,0.0028198,0.0030973,0.0018653,2.2204e-  
016,0.0011892,0.0012081,9.3005e-005,0.00097575,2.2204e-  
016,0.00011685,0.00063366,2.2204e-016,0.0040263,2.2204e-  
016,0.0066783,2.2204e-016,2.2204e-016,0.012233,2.2204e-  
016,0.013414,0.0017098,0.0037985,0.011114,2.2204e-  
016,0.0075292,3.7053e-005,2.2204e-016,4.2213e-  
005,0.01305,0.007347,2.2204e-016,2.2204e-016,2.2204e-016,2.2204e-  
016,0.0026662,0.00018063,0.0045053,0.0016291,0.0011656,2.2204e-  
016,0.00077062,2.2204e-  
016,0.001277,0.003693,0.001415,0.0014289,2.2204e-016,2.2204e-  
016,2.2204e-016,2.2204e-016,2.2204e-016,0.00015249,2.2204e-  
016,0.012245,2.2204e-016,2.2204e-016,2.2204e-016,2.2204e-

016,0.0057911,0.00051073,2.2204e-016,0.008065,0.0082763,2.2204e-  
016,2.2204e-016,2.2204e-016,0.0063637,2.2204e-016,0.017176,2.2204e-  
016,0.00095267,2.2204e-016,2.2204e-016,2.2204e-016,2.2204e-  
016,2.2204e-016,2.2204e-016,2.2204e-016,2.2204e-  
016,0.0005003,0.0016367,2.2204e-  
016,0.0013331,0.00073176,0.0010097,0.00071939,2.2204e-016,2.2204e-  
016,0.021976,2.2204e-  
016,0.034087,0.004687,0.017068,0.0048666,0.016059,2.2204e-016,2.2204e-  
016,0.0067051,0.015109,2.2204e-  
016,0.007047,0.014633,0.0027695,0.0018643,0.0087587,0.010114,0.0014381  
,0.0032229,0.0011263,2.2204e-  
016,0.0016741,0.00010017,0.00091126,2.2204e-016,2.2204e-  
016,0.0005315,2.2204e-016,2.2204e-016,2.2204e-016,0.0015208,2.2204e-  
016,2.2204e-016,0.00039843,0.0034132,2.2204e-016,2.2204e-  
016,0.0099817,2.2204e-016,2.2204e-016,0.012171,2.2204e-016,2.2204e-  
016,2.2204e-016,0.0029329,2.2204e-016,0.0043,0.0010388,2.2204e-  
016,2.2204e-016,2.2204e-016,2.2204e-016,0.015594,2.2204e-016,2.2204e-  
016,0.0011305,2.2204e-016,0.00082451,2.2204e-016,4.3159e-  
005,0.00027069,2.2204e-016,0.00034963,2.2204e-016,2.481e-  
005,0.00045334,0.0012346,0.0012647,0.00057358,1.9912e-  
005,0.00021206,0.00063505,2.2204e-  
016,0.0017315,0.012601,0.017162,2.2204e-016,0.020549,2.2204e-  
016,0.01925,2.2204e-016,0.015164,2.2204e-016,2.2204e-016,2.2204e-  
016,2.2204e-016,0.011499,0.0022386,2.2204e-016,2.2204e-  
016,0.0034538,2.2204e-016,2.2204e-  
016,0.001031,0.00077525,0.00013868,2.2204e-016,0.00028592,2.2204e-  
016,2.2204e-016,2.2204e-016,0.000421,0.00080442,2.2204e-  
016,0.00029576,0.00076326,2.2204e-016,0.00013908,0.00060107,2.2204e-  
016,2.2204e-016,0.021968,2.2204e-016,2.2204e-016,2.2204e-  
016,0.012667,0.0036261,2.2204e-016,0.0081843,0.0050092,2.2204e-  
016,2.2204e-016,2.2204e-016,0.0046098,0.0036792,2.2204e-016,2.2204e-  
016,2.2204e-016,2.2204e-016,0.0022268,0.00026097,2.2204e-  
016,0.00081265,2.2204e-016,0.00084967,2.2204e-016,2.2204e-  
016,0.0018949,0.0008113,0.0013556,0.0010581,2.2204e-016,2.2204e-  
016,0.00036417,2.2204e-016,2.2204e-016,0.00022185,2.2204e-016,2.2204e-  
016,0.010053,8.1666e-005,0.021813,0.013323,0.010826,0.010104,2.2204e-  
016,0.011033,2.2204e-016,2.2204e-016,0.00083283,2.2204e-016,2.2204e-  
016,2.2204e-016,0.007674,0.0032605,0.00024149,2.2204e-016,2.2204e-  
016,2.2204e-016,0.00083643,0.0006881,2.2204e-016,2.2204e-016,2.2204e-  
016,0.0011444,0.00097898,0.00037399,0.0012183,2.2204e-016,2.2204e-  
016,2.2204e-016,0.00020659,2.2204e-016,2.2204e-016,0.0012397,2.2204e-  
016,2.2204e-016,2.2204e-  
016,0.0024711,0.019461,0.0012612,0.0034358,2.2204e-016,2.2204e-  
016,0.0094687,0.0077184,2.2204e-016,2.2204e-016,2.2204e-  
016,0.010079,2.2204e-016,0.0088828,2.2204e-016,0.0020168,2.3261e-  
006,2.2204e-016,2.2204e-016,0.00073683,0.00016474,2.2204e-  
016,0.0014247,2.2204e-016,0.0021357,2.2204e-  
016,0.0012159,0.0003605,0.00070338,2.2204e-016,2.2204e-  
016,0.0014329,0.0011282,2.2204e-016,2.2204e-016,2.2204e-  
016,0.00089714,2.2204e-016,2.2204e-016,2.2204e-016,0.017399,2.2204e-  
016,0.0036632,2.2204e-016,2.2204e-016,0.0050437,2.2204e-  
016,0.0038116,0.0031156,0.0023766,2.2204e-

016,0.0018534,0.0022748,0.0013906,2.2204e-  
016,0.0010871,0.0024989,2.2204e-016,0.00091273,2.2204e-  
016,0.0012889,0.00079729,0.0010058,2.2204e-016,2.2204e-016,2.2204e-  
016,0.0016561,2.2204e-016,0.0013877,0.00051207,2.2204e-  
016,0.0003797,2.2204e-016,0.0011926,2.2204e-  
016,0.010611,0.01064,2.2204e-016,2.2204e-  
016,0.020249,0.0057349,0.0013462,2.2204e-016,0.0060815,2.2204e-  
016,2.2204e-016,2.2204e-016,0.0014419,0.010499,2.2204e-  
016,0.0027794,2.2204e-016,0.0020449,2.2204e-016,2.2204e-016,2.2204e-  
016,2.2204e-016,2.2204e-016,0.0006905,2.2204e-016,2.2204e-016,2.2204e-  
016,2.2204e-016,2.2204e-016,2.2204e-  
016,0.00021144,0.00043662,0.00036417,0.00043635,2.2204e-016,2.2204e-  
016,2.2204e-016,2.2204e-016,2.2204e-016,0.001339,2.2204e-016,2.2204e-  
016,0.016007,0.0089574,2.2204e-016,2.2204e-016,2.2204e-  
016,0.018916,0.0050183,0.0057731,0.012216,2.2204e-016,2.2204e-  
016,2.2204e-016,0.0049046,0.0085048,2.2204e-016,2.2204e-016,2.2204e-  
016,0.00019606,2.296e-005,0.0010711,2.2204e-  
016,0.00057678,0.00024452,0.00059458,2.2204e-016,2.2204e-  
016,0.0020224,0.00046837,2.2204e-016,2.2204e-  
016,0.0010129,0.00033217,2.2204e-  
016,0.011787,0.0080629,0.012143,0.0080728,0.018521,0.001777,2.2204e-  
016,3.8839e-005,2.2204e-016,2.2204e-  
016,0.0029865,0.00054335,0.0032649,2.2204e-016,0.0011957,2.2204e-  
016,2.2204e-016,0.0025356,0.001756,2.2204e-016,2.2204e-016,8.6578e-  
005,2.2204e-016,0.00047996,2.2204e-016,0.0021448,0.00019156,2.2204e-  
016,2.2204e-016,2.2204e-016,0.00098806,2.2204e-016,2.2204e-  
016,2.2204e-016,2.2204e-016,2.2204e-016,2.2204e-  
016,0.0088283,0.00071351,0.0074633,0.0042341,0.0062558,2.2204e-  
016,2.2204e-016,0.0048833,0.0059054,2.2204e-016,2.2204e-  
016,0.00050226,0.0046637,2.2204e-016,0.0021776,2.2204e-016,2.2204e-  
016,2.2204e-016,0.00011844,2.2204e-016,2.2204e-016,2.2204e-  
016,2.2204e-016,0.00063695,0.00031657,2.2204e-016,2.2204e-  
016,0.001323,2.2204e-016,0.00047935,0.00095355,2.2204e-016,2.2204e-  
016,2.2204e-016,0.00090903,2.2204e-016,0.0008255,0.0027238,2.2204e-  
016,2.2204e-016,2.2204e-016,2.2204e-016,0.0029076,2.2204e-  
016,0.013414,2.2204e-016,2.2204e-016,2.2204e-016,2.2204e-016,2.2204e-  
016,0.0073461,0.0033803,0.0068301,2.2204e-016,0.010574,2.2204e-  
016,2.2204e-016,0.001152,0.0002641,0.00078162,0.00045113,2.2204e-  
016,0.00078622,2.2204e-016,0.00051419,0.0001995,2.2204e-016,2.2204e-  
016,0.00029005,0.0011483,0.00045344,2.2204e-016,0.00048304,2.2204e-  
016,2.2204e-016,0.011752,2.2204e-016,2.2204e-016,0.0091565,2.2204e-  
016,2.2204e-016,2.2204e-016,2.2204e-016,0.0055758,2.2204e-  
016,0.010239,0.00075518,0.0013626,6.9293e-005,2.2204e-016,2.2204e-  
016,0.00033659,0.00093789,0.00010939,0.00054397,0.0016812,0.00070168,2  
.2204e-016,0.00038856,0.00040625,2.2204e-016,2.2204e-  
016,0.0014363,0.00082597,2.2204e-016,2.2204e-016,2.2204e-016,2.2204e-  
016,2.2204e-016,0.0004083,2.2204e-016,0.00090716,2.2204e-  
016,0.017215,2.2204e-016,0.0053896,0.012576,0.0024245,2.2204e-  
016,2.2204e-016,0.0024408,2.2204e-016,0.0093069,2.2204e-  
016,0.0013265,0.00035277,0.0034972,2.085e-005,2.2204e-016,2.2204e-  
016,2.2204e-016,2.2204e-016,2.2204e-016,2.2204e-016,0.001306,2.2204e-  
016,0.00059117,0.00043791,2.2204e-016,2.2204e-

016,0.0011391,0.00083803,0.0002815,2.2204e-016,0.00014129,9.0886e-005,2.2204e-016,2.2204e-016,0.00068891,0.00052922,2.2204e-016,0.010208,2.2204e-016,0.0050374,2.2204e-016,0.021099,2.2204e-016,0.0068055,0.00075321,2.2204e-016,2.2204e-016,2.2204e-016,2.2204e-016,2.2204e-016,2.2204e-016,2.2204e-016,0.0015495,2.2204e-016,0.0017238,2.2204e-016,0.00013791,0.0016821,0.00074587,2.2204e-016,0.00051203,0.0017525,0.00069625,0.0022776,0.0003675,0.0014553,2.2204e-016,2.2204e-016,0.00016139,2.2204e-016,2.2204e-016,2.2204e-016,0.0091351,0.0063555,3.2535e-005,0.0030562,2.2204e-016,0.00082778,0.0005205,0.00057811,0.00071812,2.2204e-016,2.2204e-016,0.00045078,0.0023081,2.2204e-016,0.0030945,0.00077352,2.2204e-016,2.2204e-016,0.0011407,0.0029587,2.2204e-016,4.4489e-005,0.001176,2.2204e-016,0.00019623,0.00032453,2.2204e-016,0.0018564,0.00086072,2.2204e-016,0.00060998,0.00073873,2.2204e-016,2.2204e-016,2.2204e-016,0.0013917,0.0013087,0.00016781,0.0074086,0.0016653,2.2204e-016,5.0212e-005,2.2204e-016,0.0014961,2.2204e-016,2.2204e-016,0.0018032,0.00030372,0.0012383,2.2204e-016,2.2204e-016,2.2204e-016,2.2204e-016,0.00025482,2.2204e-016,2.2204e-016,2.2204e-016,2.2204e-016,2.2204e-016,0.001623,2.2204e-016,2.2204e-016,2.2204e-016,0.0023606,2.2204e-016,0.001545,0.0017621,0.00086032,0.0013375,0.0010728,0.00052604,2.2204e-016,0.0008491,0.00097673,2.2204e-016,0.00035228,0.0007292,0.0024685,2.2204e-016,2.2204e-016,7.718e-005,0.0019711,2.2204e-016,2.2204e-016,0.0003809,2.2204e-016,0.0010419,0.00083946,2.2204e-016,2.2204e-016,2.2204e-016,0.00039615,2.2204e-016,0.00034921,0.0015624,2.2204e-016,2.2204e-016,0.0001457,2.2204e-016,0.0010481,2.2204e-016,2.2204e-016,2.2204e-016,0.00091877,7.0312e-005,0.0003132,0.0010091,2.2204e-016,0.0017411,0.0013843,0.0011085,2.2204e-016,2.2204e-016,0.0016346,2.2204e-016,0.00035785,0.001311,0.00095053,2.2204e-016,2.3312e-005,2.2204e-016,0.00074276,0.0016552,0.0004785,2.2204e-016,2.2204e-016,2.2204e-016,2.2204e-016,2.2204e-016,0.00085909,2.2204e-016,2.2204e-016,2.2204e-016,2.2204e-016,2.2204e-016,2.2204e-016,2.2204e-016,0.00077311,2.2204e-016,5.0414e-005,2.2204e-016,2.2204e-016,0.0010691,2.2204e-016,0.00078844,0.00072594,2.2204e-016,2.2204e-016,2.2204e-016,2.2204e-016,2.2204e-016,2.2204e-016,0.001516,2.2204e-016,0.00089308,0.00031222,0.001045,0.0009393,2.2204e-016,0.00074411,0.00067531,2.2204e-016,2.2204e-016,0.001142,2.2204e-016,0.00012053,0.0019126,0.00014749,2.2204e-016,2.2204e-016,2.2204e-016,0.0004688,0.0010228,0.0011735,0.0014532,2.2204e-016,0.00056491,0.00068583,2.2204e-016,2.2204e-016,0.0016804,0.00066254,2.2204e-016,0.0001349,0.00083991,2.2204e-016,2.2204e-016,0.00076545,2.2204e-016,0.00017112,0.00039035,0.0020808,0.0017677,2.2204e-016,2.2204e-016,0.00089008,0.00065578,2.2204e-016,2.2204e-016,0.00039029,2.2204e-016,0.00044121,2.2204e-016,2.2204e-016,2.2204e-016,0.00028217,0.0016697,2.2204e-016,5.9243e-005,0.00086979,0.00047967,2.2204e-016,2.2204e-016,2.2204e-016,2.2204e-016,2.2204e-016,2.2204e-016,0.00050062,0.00072728,4.213e-005,4.6473e-005,2.2204e-016,0.00046489,0.00020925,2.2204e-016,2.2204e-016

016,0.00043722,0.00025817,0.0010825,2.2204e-016,2.2204e-  
016,0.001109,0.00035657,2.2204e-016,0.00049333,2.2204e-  
016,0.00042834,2.2204e-016,2.2204e-016,2.2204e-016,0.0012855,2.2204e-  
016,0.00014939,2.2204e-016,2.2204e-016,0.00076616,0.001438,2.2204e-  
016,2.2204e-016,0.00052661,2.2204e-016,2.2204e-016,2.2204e-  
016,2.2204e-016,2.2204e-016,0.0012436,2.2204e-016,2.2204e-016,2.2204e-  
016,2.2204e-016,2.2204e-016,5.3602e-005,0.0012067,0.0002857,2.2204e-  
016,0.00031481,0.001032,0.0003871,0.0012371,0.0017247,0.00058803,0.000  
9119,0.00065241,0.00021408,2.2204e-016,2.2204e-016,2.2204e-  
016,2.2204e-016,0.00068495,2.2204e-016,2.2204e-016,2.2204e-  
016,2.2204e-016,2.2204e-016,0.0013381,2.2204e-016,2.2204e-016,2.2204e-  
016,2.2204e-016,2.2204e-016,2.2204e-  
016,0.0015425,0.00037835,0.00042331,0.0021613,2.2204e-016,2.2204e-  
016,0.00025682,0.00030652,2.2204e-016,2.2204e-016,2.2204e-016,2.2204e-  
016,0.0003164,0.00048478,2.2204e-016,2.2204e-016,4.2469e-  
005,0.0012935,2.2204e-016,2.2204e-016,2.2204e-  
016,0.0011061,0.00093271,0.0017918,0.00011096,2.2204e-016,7.0424e-  
005,2.2204e-016,0.0005622,0.00018798,0.00079344,6.2002e-  
005,0.0005419,0.00066581,2.2204e-  
016,0.00068885,0.00072481,0.00074508,2.2204e-016,0.00065054,2.2204e-  
016,2.2204e-016,0.00012369,0.00044184,0.00010578,2.2204e-016,2.2204e-  
016,0.001142,2.2204e-016,0.00017023,2.2204e-016,2.2204e-016,7.9262e-  
005,2.2204e-016,2.2204e-016,0.00098643,0.00037086,2.2204e-016,2.2204e-  
016,2.2204e-016,2.2204e-016,2.2204e-  
016,0.00031044,0.00015878,0.0003702,2.2204e-016,2.2204e-016,2.2204e-  
016,0.0005058,0.0017032,2.2204e-016,0.00044416,2.2204e-016,2.2204e-  
016,2.2204e-016,2.2204e-016,2.2204e-016,9.692e-  
005,0.00068352,0.00042014,2.2204e-016,2.2204e-016,0.00049216,2.2204e-  
016,2.2204e-016,2.2204e-016,2.2204e-016,2.1097e-  
005,0.00066843,0.00029371,0.00058035,0.00034721,0.00018088  
0.070343,0.073717,0.074786,0.06979,0.07314,0.071476,0.070493,0.071291,  
0.073718,0.06902,0.071762,0.06823,0.071056,0.071272,0.071209,0.069123,  
0.070454,0.075141,0.072774,0.06985,1.2406,1.2081,1.2218,1.3257,0.07166  
,0.072359,0.066686,0.0703,0.071564,0.07011,0.070999,0.072866,0.068475,  
0.07008,0.072651,0.073521,0.073511,0.068746,0.072552,2.3787,1.2077,1.1  
925,1.2286,1.1623,1.2245,1.5113,0.071707,0.071742,0.06847,0.070103,0.0  
72298,0.07414,0.071077,0.070039,0.071078,0.071876,0.072374,0.072769,0.  
069867,0.072837,0.071669,2.3641,2.4077,1.3893,1.2951,1.2753,1.346,1.19  
17,1.2316,1.1959,1.347,0.069879,0.071324,0.070043,0.066747,0.071047,0.  
070906,0.073702,0.073281,0.069111,0.071915,0.069589,0.070171,0.071211,  
0.071172,0.066884,2.4046,2.4102,2.3742,1.2491,1.2202,0.97507,1.2285,1.  
3073,1.349,1.2389,1.2565,1.3507,0.072144,0.072515,0.071826,0.073425,0.  
07035,0.07305,0.07189,0.074046,0.071096,0.071603,0.069288,0.071958,0.0  
73124,0.072322,0.069214,0.07242,2.4042,2.3677,2.376,2.4034,1.0849,1.07  
49,1.2558,1.1684,1.2824,1.2405,1.2166,1.2435,1.3004,1.0901,0.070654,0.  
071552,0.068451,0.07176,0.073424,0.071513,0.07321,0.069785,0.070907,0.  
072028,0.074112,0.073134,0.07237,0.069329,0.071926,0.069909,2.3661,2.3  
809,2.3772,2.4018,2.3948,2.3833,1.3086,1.4219,1.2315,1.1497,1.2167,1.2  
417,1.2813,1.2525,1.2208,1.2248,0.06871,0.073386,0.072163,0.069998,0.0  
72333,0.071496,0.068436,0.071071,0.068712,0.073661,0.075552,0.07227,0.  
076761,0.072369,0.07377,0.07229,0.069016,2.3839,2.3955,2.3989,2.3779,2  
.3691,2.3768,1.3579,1.8436,1.1675,0.99451,1.1312,1.2966,1.1609,1.2239,

1.2238,1.3422,1.4116,0.07173,0.071974,0.073246,0.071079,0.072586,0.073  
702,0.0684,0.07402,0.073319,0.070184,0.067848,0.069343,0.072445,0.0726  
4,0.072812,0.072021,0.07311,2.353,2.3962,2.3834,2.3854,2.3866,2.3995,2  
.3865,1.2255,1.2288,1.2171,1.3605,1.2439,1.2132,1.1573,1.1737,1.2693,1  
.0961,0.99739,0.072187,0.070411,0.071705,0.06967,0.067535,0.073264,0.0  
73639,0.073354,0.070515,0.07085,0.071831,0.070649,0.072131,0.070624,0.  
071651,0.071956,0.069736,0.075332,2.3795,2.4088,2.3916,2.3706,2.3907,2  
.3779,2.3989,1.2642,1.0761,1.3235,0.81249,1.1462,1.2239,1.1825,1.4603,  
1.0409,1.2329,1.1379,0.068267,0.070202,0.06826,0.074018,0.070962,0.075  
883,0.071971,0.074214,0.070557,0.072627,0.070949,0.071763,0.074184,0.0  
73444,0.072782,0.070224,0.071606,0.071846,0.071959,2.3594,2.3966,2.364  
9,2.4037,2.3688,2.3807,2.374,1.2231,1.2763,1.2214,1.1113,1.1424,1.188,  
1.0876,1.4715,1.2179,1.2319,1.2317,1.245,0.071888,0.073336,0.069986,0.  
070444,0.070026,0.069241,0.071867,0.068956,0.071626,0.070866,0.072224,  
0.073943,0.068664,0.072772,0.072242,0.072023,0.071724,0.070118,2.3866,  
2.4108,2.3751,2.4216,2.3994,2.4153,2.3938,1.2486,1.2223,1.2463,1.1576,  
1.2717,1.3623,1.0912,1.2352,0.94089,1.2655,1.0709,1.3745,0.073555,0.07  
4406,0.073241,0.071122,0.072975,0.071655,0.07174,0.07056,0.070069,0.07  
1678,0.071482,0.070546,0.071445,0.07375,0.072436,0.071027,0.072191,0.0  
74341,2.3553,2.3767,2.4041,2.359,2.377,2.4078,2.3806,2.3727,2.3649,1.3  
816,1.261,1.2349,1.2305,1.2341,1.1202,1.2196,1.2949,1.244,1.187,0.9776  
4,0.073408,0.072059,0.073115,0.070135,0.071526,0.071955,0.070011,0.071  
211,0.070066,0.070965,0.071488,0.073279,0.073105,0.071782,0.071315,0.0  
72178,0.072053,0.071561,2.3803,2.3935,2.4017,2.357,2.4112,2.3644,2.393  
1,2.3762,2.3954,1.2253,1.1748,0.54983,0.7917,0.93803,0.69568,0.88043,0  
.92979,0.83058,0.89244,0.88572,0.073664,0.071968,0.070749,0.071049,0.0  
70933,0.071227,0.070885,0.071376,0.072821,0.071829,0.071022,0.07178,0.  
071841,0.071617,0.071874,0.071356,0.071525,0.071679,2.4041,2.3802,2.4,  
2.3805,2.4031,2.3857,2.3546,2.4043,2.3843,1.2984,0.93997,0.78292,0.998  
67,0.84365,0.81228,0.7262,0.92233,0.79223,0.89437,0.87681,0.070182,0.0  
72487,0.070605,0.072599,0.071813,0.071842,0.073145,0.071442,0.073402,0  
.072153,0.070772,0.069137,0.072018,0.07031,0.071044,0.07145,0.070771,0  
.070332,2.3842,2.3906,2.3905,2.4082,2.3933,2.4042,2.3807,1.2363,1.1159  
,1.2467,1.0514,0.83692,0.8084,0.83041,0.91766,0.8507,0.85809,0.83539,0  
.59991,0.90786,0.072251,0.072292,0.071151,0.071384,0.071083,0.072618,0  
.072384,0.071833,0.073296,0.071175,0.069434,0.071721,0.072244,0.071036  
,0.07048,0.072691,0.06845,0.070572,2.3838,2.379,2.416,2.3821,2.3898,2.  
3585,1.2095,1.3306,1.3398,1.1797,1.2215,0.86356,0.85195,0.87124,0.811,  
0.80613,0.59429,0.83997,0.88439,0.84032,0.07235,0.071384,0.071686,0.07  
2276,0.070886,0.073954,0.070533,0.072381,0.071602,0.072388,0.071617,0.  
070585,0.073301,0.073228,0.070453,0.06905,0.07163,0.071758,2.3705,2.38  
38,2.358,2.3958,2.3705,1.0365,1.154,1.1524,1.3077,1.2297,1.1407,0.8418  
6,0.69491,0.96148,0.84415,0.70817,0.79732,0.85297,0.85602,0.84732,0.07  
1186,0.072802,0.072249,0.073268,0.071904,0.072024,0.070898,0.070953,0.  
07049,0.073002,0.070864,0.073359,0.072026,0.072592,0.071936,0.071496,0  
.072378,0.070414,2.3876,2.3934,2.37,1.5694,1.186,1.5828,1.2571,1.2212,  
1.2354,1.1145,1.2608,0.95076,0.89186,0.90035,0.87686,0.87451,0.99215,0  
.90524,0.84832,1.0474,0.070239,0.071246,0.069797,0.072043,0.070431,0.0  
70905,0.070916,0.070879,0.071073,0.071305,0.072583,0.071892,0.072379,0  
.072108,0.071186,0.071295,0.071104,0.070473,2.3861,1.2264,1.1133,1.168  
6,1.3169,1.357,1.2151,1.1332,1.2831,1.3849,0.84341,0.89177,0.90913,0.8  
4202,1.0135,0.72457,0.65413,0.88991,0.84109,0.070762,0.070189,0.070865

,0.071305,0.072374,0.069541,0.072285,0.071451,0.071953,0.071922,0.0699  
07,0.073435,0.071752,0.070999,0.070163,0.071744,0.070742,0.070982,1.15  
14,1.2385,0.97551,1.2374,1.2448,1.3475,1.095,1.331,1.2326,1.0824,0.843  
82,0.86111,0.79528,0.8448,0.6325,0.8498,0.98825,0.84643,0.83728,0.0705  
73,0.071732,0.07133,0.071859,0.071504,0.069679,0.073949,0.07146,0.0713  
19,0.071538,0.071451,0.072519,0.0694,0.070465,0.070516,0.071575,0.0697  
45,0.070668,1.196,1.2478,1.1433,0.65988,1.2633,1.2225,1.2701,1.3445,1.  
3652,1.2222,0.86677,0.88782,0.7614,0.895,0.71345,0.89275,0.77635,0.916  
63,0.071777,0.071006,0.071071,0.070733,0.069235,0.072693,0.071378,0.07  
0965,0.071153,0.071845,0.07098,0.07199,0.072576,0.071723,0.071207,0.07  
0705,0.071636,0.070726,0.071723,1.3316,1.2276,1.2257,1.1829,1.2206,1.2  
393,1.3018,1.2391,0.97912,1.2915,0.96448,0.84021,0.77197,0.78046,0.992  
4,0.85497,0.65638,0.98634,0.070124,0.070869,0.072611,0.071277,0.072746  
,0.071516,0.070926,0.071484,0.070717,0.072226,0.071319,0.06968,0.07014  
9,0.071489,0.072254,0.07327,0.071736,0.072627,0.072056,0.070707,1.1564  
,1.4587,1.1757,1.2397,1.0881,1.1861,0.94214,1.1129,1.2877,0.98649,0.71  
316,1.1075,1.0178,0.86879,0.83068,0.070177,0.07181,0.073161,0.071128,0.  
.072212,0.073053,0.07229,0.070804,0.07197,0.072435,0.070267,0.070893,0.  
.072709,0.071248,0.070171,0.070966,0.07129,0.071195,0.070246,0.070887,  
0.070529,0.072401,1.2726,1.2438,1.2248,0.43857,1.2551,1.2528,0.88321,1.  
.3699,1.2337,0.83964,0.87966,0.81348,0.073031,0.071648,0.075594,0.0714  
18,0.070972,0.071468,0.071357,0.071308,0.071171,0.069411,0.072705,0.07  
0954,0.072269,0.071282,0.071637,0.070126,0.072823,0.071571,0.072374,0.  
070223,0.071662,0.070957,0.070534,0.070619,0.072118,0.071981,1.2237,1.  
3076,1.099,0.87731,1.3088,1.3583,1.2269,1.022,0.072763,0.070993,0.0703  
59,0.072035,0.070486,0.071345,0.071415,0.07043,0.071357,0.072775,0.070  
606,0.07339,0.069841,0.071356,0.073061,0.072132,0.071187,0.07119,0.072  
437,0.071953,0.073075,0.071043,0.073469,0.07145,0.071035,0.071447,0.07  
0883,0.070119,0.07029,1.2386,1.366,0.80578,1.0991,1.3051,0.071815,0.07  
1909,0.071358,0.071706,0.070466,0.070652,0.072626,0.073433,0.071763,0.  
074411,0.072887,0.071858,0.070186,0.072267,0.073861,0.070436,0.071334,  
0.072937,0.07225,0.071579,0.071884,0.070196,0.07355,0.072406,0.07032,0.  
.071989,0.072154,0.071267,0.072323,0.070226,0.072499,0.072955,0.071671  
,1.2296,1.277,0.071091,0.071783,0.070502,0.072393,0.070018,0.071343,0.  
07395,0.071882,0.072264,0.070408,0.071006,0.069463,0.06978,0.072446,0.  
070255,0.071648,0.071254,0.070878,0.072864,0.070702,0.072369,0.070929,  
0.073582,0.070719,0.072264,0.073732,0.071777,0.072259,0.072503,0.07224  
6,0.071215,0.072567,0.073348,0.070419,0.072043,0.071961,0.074067,0.070  
84,0.070751,0.071253,0.073603,0.06999,0.071795,0.071894,0.071463,0.072  
356,0.071945,0.071563,0.071559,0.070554,0.072428,0.070355,0.072166,0.0  
72774,0.070407,0.070875,0.071316,0.070259,0.071911,0.071093,0.071389,0.  
.070423,0.071346,0.073202,0.07175,0.071953,0.07264,0.070399,0.073429,0.  
.072394,0.072252,0.070581,0.070553,0.073519,0.071135,0.07185,0.072566,  
0.072449,0.070404,0.07011,0.071151,0.072373,0.073012,0.071532,0.07055,  
0.071177,0.070379,0.071029,0.070592,0.07229,0.070838,0.070561,0.070773  
,0.071059,0.070714,0.071583,0.07245,0.070866,0.07124,0.071561,0.070986  
,0.072606,0.071028,0.072699,0.072438,0.07085,0.071839,0.070118,0.07085  
7,0.071129,0.0741,0.070295,0.072391,0.071915,0.07266,0.071885,0.070551  
,0.072036,0.072358,0.071014,0.070969,0.072474,0.070651,0.071612,0.0734  
34,0.071275,0.070958,0.070519,0.070777,0.071824,0.072494,0.072427,0.07  
2915,0.071381,0.072014,0.071905,0.071176,0.070381,0.073018,0.072381,0.  
070441,0.07167,0.072033,0.071139,0.069854,0.072811,0.071156,0.071596,0

.071485,0.07353,0.072491,0.071515,0.06942,0.072341,0.072788,0.071315,0.071351,0.071426,0.070881,0.071085,0.071382,0.069903,0.071014,0.071877,0.073385,0.069532,0.07179,0.072179,0.071508,0.071247,0.070926,0.070949,0.071384,0.069852,0.070226,0.071935,0.071714,0.071859,0.071626,0.071608,0.07167,0.071273,0.0707,0.071736,0.072371,0.071413,0.072311,0.070939,0.071385,0.07246,0.0719,0.070968,0.072082,0.071839,0.072008,0.07153,0.071651,0.071667,0.072147,0.071435,0.071651,0.071656,0.070726,0.07278,0.072857,0.070832,0.07052,0.072079,0.070514,0.07032,0.071428,0.071479,0.070215,0.072729,0.069938,0.070895,0.071839,0.07189,0.070428,0.071093,0.072852,0.071974,0.07151,0.072391,0.071946,0.072669,0.072616,0.072856,0.07202,0.072474,0.072224,0.072166,0.071578,0.070955,0.071129,0.071305,0.071835,0.070605,0.071381,0.071285,0.071259,0.071782,0.073227,0.071386,0.071067,0.070415,0.070983,0.070426,0.07104,0.072921,0.072134,0.071911,0.072819,0.070108,0.070315,0.071902,0.072279,0.071213,0.070282,0.071196,0.071282,0.071827,0.071993,0.070606,0.070205,0.071225,0.072732,0.070594,0.070984,0.07166,0.072674,0.072436,0.073866,0.072253,0.072061,0.07184,0.07113,0.072467,0.071585,0.072731,0.071433,0.07194,0.072302,0.069981,0.072035,0.072448,0.072628,0.071755,0.071982,0.070429,0.070905,0.071541,0.071646,0.071432,0.070262,0.070938,0.072238,0.070288,0.071811,0.069943,0.071054,0.071405,0.071019,0.071307,0.073318,0.072381,0.071138,0.071124,0.070597,0.071555,0.070335,0.072317,0.072335,0.071365,0.070251,0.071719,0.071089,0.072035,0.07279,0.070523,0.072485,0.070308,0.071374,0.070812,0.07005,0.07189,0.070896,0.072481,0.071939,0.070832,0.070656,0.072426,0.071334,0.071016,0.071256,0.071221,0.071279,0.072355,0.071973,0.072143,0.072288,0.072108  
0.11549,0.11801,0.11909,0.11431,0.11725,0.11778,0.11421,0.11692,0.11807,0.11337,0.11615,0.11264,0.11586,0.11515,0.11499,0.11384,0.11458,0.121,0.11753,0.11491,0.864,0.84643,0.84687,0.91808,0.11619,0.118,0.11133,0.11524,0.11652,0.11464,0.11642,0.11739,0.11394,0.11407,0.11772,0.11672,0.11728,0.11362,0.11617,1.5895,0.83349,0.83211,0.85556,0.81351,0.85513,1.0315,0.11691,0.11615,0.11324,0.11574,0.11671,0.11648,0.11562,0.11475,0.11657,0.11697,0.1175,0.1177,0.11557,0.11808,0.11491,1.5874,1.6131,0.96613,0.89579,0.88342,0.93947,0.82911,0.84831,0.83568,0.93243,0.11472,0.11779,0.1143,0.11223,0.11548,0.11549,0.11661,0.1179,0.11322,0.11653,0.11313,0.11564,0.11622,0.11647,0.11199,1.6216,1.621,1.5869,0.87164,0.85332,0.69221,0.8661,0.90746,0.93343,0.86965,0.87382,0.93203,0.1171,0.11611,0.11515,0.11757,0.11489,0.1178,0.11521,0.11859,0.11495,0.11535,0.11331,0.11498,0.11921,0.11788,0.11405,0.11733,1.613,1.5811,1.5906,1.6129,0.76135,0.75842,0.88404,0.81977,0.89193,0.87166,0.84011,0.87026,0.9067,0.76778,0.11546,0.11683,0.11318,0.11696,0.11868,0.11605,0.11777,0.11478,0.1151,0.11586,0.11905,0.11826,0.11606,0.11342,0.11728,0.11521,1.5841,1.5997,1.5765,1.6086,1.6027,1.5942,0.90776,0.98007,0.8615,0.80721,0.85053,0.8582,0.88834,0.87364,0.84682,0.85331,0.11435,0.11731,0.11638,0.1151,0.11576,0.11596,0.11195,0.11553,0.11448,0.11746,0.12016,0.11777,0.12191,0.11604,0.11738,0.11613,0.11379,1.603,1.5942,1.6126,1.591,1.5884,1.5771,0.93991,1.2503,0.81939,0.70752,0.78426,0.89958,0.81225,0.85789,0.85449,0.92856,0.97942,0.11662,0.11549,0.11676,0.11662,0.11769,0.11698,0.11272,0.11774,0.11831,0.11517,0.11317,0.11446,0.11737,0.11074,0.112,0.11043,0.1175,1.5715,1.6005,1.5903,1.5813,1.5983,1.6192,1.6002,0.8516,0.86176,0.85075,0.94395,0.87768,0.8386,0.81445,0.81844,0.88954,0.76803,0.70439,0.11644,0.11387,0.11487,0.11371,0.11172,0.11676,0.11714,0.11778,0.11631,0.11466,0.11605,0.10921,0.11051,0.10831,0.10



869,0.10884,0.10847,0.11833,1.6009,1.6219,1.5956,1.5956,1.5968,1.6011,  
1.6113,0.87689,0.76087,0.91569,0.58608,0.81013,0.85497,0.83056,1.0035,  
0.73942,0.85906,0.79994,0.11323,0.115,0.11207,0.11915,0.11532,0.11902,  
0.11666,0.11873,0.1151,0.10982,0.10884,0.11005,0.11226,0.11047,0.10978  
,0.10925,0.10949,0.11115,0.11607,1.5814,1.5994,1.5909,1.5989,1.5722,1.  
5883,1.5887,0.85046,0.88633,0.84726,0.78365,0.79931,0.83511,0.75867,1.  
015,0.84138,0.86043,0.8577,0.87248,0.1177,0.11785,0.11287,0.11482,0.11  
536,0.11442,0.10892,0.10773,0.10983,0.11078,0.11233,0.11169,0.10748,0.  
11115,0.11019,0.11177,0.11025,0.10822,1.5975,1.6331,1.5921,1.641,1.616  
7,1.6205,1.5977,0.87678,0.84768,0.86467,0.81282,0.88571,0.94184,0.7688  
1,0.86231,0.67469,0.88299,0.75926,0.95487,0.11822,0.1177,0.11767,0.11,  
0.11079,0.10955,0.10972,0.10909,0.10768,0.1122,0.11006,0.1097,0.10903,  
0.1117,0.11069,0.10982,0.11083,0.11331,1.5555,1.5802,1.6122,1.5691,1.5  
725,1.629,1.5956,1.5982,1.5742,0.95647,0.87602,0.86265,0.86492,0.85966  
,0.79455,0.85094,0.89708,0.86616,0.82918,0.69265,0.11163,0.11049,0.111  
25,0.10851,0.10912,0.11061,0.10825,0.10891,0.1081,0.1096,0.10982,0.11,  
0.11374,0.11028,0.10967,0.10899,0.11118,0.10979,1.5977,1.5939,1.6154,1.  
.57,1.6255,1.575,1.6092,1.5921,1.6134,0.85286,0.81494,0.41519,0.5706,0.  
.6695,0.51273,0.63084,0.65839,0.60074,0.63878,0.63412,0.11163,0.11164,  
0.10793,0.10921,0.11003,0.10922,0.10694,0.10974,0.11083,0.11014,0.1097  
5,0.1102,0.10876,0.10985,0.10942,0.10949,0.11143,0.11105,1.6102,1.6032  
,1.6083,1.582,1.6066,1.5936,1.5713,1.6083,1.6085,0.89267,0.66361,0.565  
32,0.70687,0.61093,0.58913,0.53109,0.65781,0.57504,0.64279,0.62754,0.1  
0934,0.10967,0.10852,0.11146,0.11028,0.11071,0.11208,0.10933,0.11179,0.  
.1094,0.1086,0.10823,0.11033,0.10862,0.10916,0.10985,0.10916,0.10864,1.  
.5895,1.6095,1.5867,1.6217,1.6149,1.6038,1.5958,0.85773,0.77566,0.8597  
6,0.73593,0.60254,0.58275,0.59493,0.65686,0.61103,0.61927,0.59698,0.44  
63,0.64592,0.10985,0.11045,0.10936,0.11011,0.11063,0.11094,0.10719,0.1  
1,0.1121,0.10907,0.10816,0.1091,0.11045,0.10848,0.10971,0.11028,0.1071  
9,0.10826,1.5892,1.5836,1.6364,1.5878,1.5852,1.5726,0.8332,0.91928,0.9  
2756,0.81605,0.84696,0.61217,0.6152,0.61895,0.58901,0.58684,0.44878,0.  
60366,0.63309,0.60247,0.11195,0.10929,0.10967,0.10926,0.10745,0.11298,  
0.10892,0.11133,0.1101,0.11024,0.10942,0.10989,0.11139,0.11108,0.10882  
,0.10748,0.11127,0.11071,1.5899,1.6049,1.5551,1.611,1.5974,0.72601,0.8  
0458,0.79823,0.9023,0.85564,0.79732,0.60519,0.51097,0.67755,0.60481,0.  
52091,0.5773,0.60827,0.6173,0.60868,0.11024,0.11073,0.10938,0.11028,0.  
10983,0.11089,0.11022,0.1085,0.10971,0.11037,0.10858,0.11126,0.10963,0.  
.11104,0.10971,0.1093,0.11045,0.10874,1.595,1.6099,1.5874,1.0655,0.831  
22,1.0843,0.87309,0.84381,0.85918,0.77723,0.86651,0.67877,0.63951,0.64  
085,0.6301,0.62412,0.70986,0.65077,0.61082,0.74003,0.10971,0.109,0.108  
63,0.11038,0.10879,0.11011,0.10979,0.10849,0.10989,0.10817,0.11232,0.1  
101,0.11078,0.10921,0.11082,0.10963,0.10993,0.1085,1.6024,0.85097,0.77  
813,0.80884,0.91221,0.94741,0.83932,0.79014,0.8822,0.95323,0.60385,0.6  
36,0.64689,0.60319,0.72221,0.53235,0.48982,0.63689,0.59969,0.10851,0.1  
0906,0.1085,0.11025,0.11118,0.10805,0.11121,0.11029,0.1092,0.11014,0.1  
0852,0.11146,0.11073,0.10891,0.10834,0.10928,0.11,0.10261,0.79648,0.86  
332,0.69466,0.84504,0.86923,0.9325,0.76286,0.91895,0.8576,0.75744,0.60  
467,0.6143,0.57356,0.60762,0.47026,0.60759,0.70257,0.60443,0.60425,0.1  
083,0.1099,0.10986,0.10955,0.10986,0.10889,0.11195,0.11017,0.11012,0.1  
0999,0.1095,0.10973,0.10753,0.10887,0.10812,0.10956,0.10846,0.10327,0.  
82932,0.86426,0.79666,0.48789,0.87721,0.84368,0.87279,0.92112,0.92818,  
0.84493,0.62081,0.63704,0.55294,0.63926,0.52133,0.6371,0.56712,0.65169

,0.11067,0.10805,0.10794,0.10976,0.10867,0.11104,0.10893,0.10957,0.10939,0.10914,0.10732,0.10914,0.10959,0.11018,0.10833,0.10772,0.10885,0.10916,0.10424,0.92024,0.84239,0.84859,0.81446,0.84457,0.86271,0.88664,0.85947,0.69906,0.89033,0.67716,0.60117,0.55617,0.56471,0.7025,0.61168,0.48136,0.70539,0.10928,0.10879,0.11043,0.10974,0.11138,0.1103,0.11056,0.10877,0.10885,0.11182,0.10851,0.10793,0.10714,0.11035,0.11177,0.11064,0.11015,0.10406,0.10387,0.1028,0.80784,0.99953,0.8151,0.86094,0.7521,0.82373,0.66582,0.76328,0.89842,0.69887,0.52657,0.77239,0.71923,0.62223,0.59608,0.10978,0.11036,0.11131,0.10928,0.10959,0.11301,0.10988,0.10939,0.10916,0.1118,0.10801,0.10806,0.11098,0.11144,0.11035,0.10935,0.11003,0.1094,0.10229,0.10252,0.10316,0.10461,0.86816,0.86934,0.84405,0.33997,0.86972,0.86682,0.62774,0.93989,0.85071,0.6031,0.62924,0.58459,0.11135,0.1082,0.11353,0.10952,0.10882,0.11035,0.10876,0.1092,0.11018,0.10803,0.11189,0.11,0.10976,0.11048,0.10834,0.10896,0.11097,0.10983,0.11132,0.10899,0.10308,0.10291,0.10228,0.10343,0.1046,0.10343,0.84902,0.90836,0.76621,0.62901,0.90213,0.94818,0.85089,0.71582,0.11193,0.10722,0.10975,0.11094,0.10888,0.11147,0.10842,0.10758,0.10977,0.11097,0.10867,0.11144,0.10878,0.10902,0.1114,0.11062,0.1095,0.1101,0.1125,0.11001,0.11163,0.1098,0.11228,0.10355,0.10313,0.10337,0.10387,0.10212,0.10162,0.85324,0.94121,0.57675,0.77029,0.89889,0.10432,0.10406,0.10989,0.1085,0.11136,0.10924,0.11115,0.11158,0.11056,0.11296,0.11131,0.10929,0.10844,0.10993,0.10978,0.10744,0.11041,0.11267,0.11095,0.11022,0.10995,0.10933,0.1116,0.10507,0.10252,0.10464,0.10424,0.10297,0.1047,0.10267,0.10443,0.10499,0.10391,0.85536,0.8805,0.1035,0.10402,0.10272,0.10432,0.10801,0.1099,0.11256,0.11173,0.1105,0.1091,0.11,0.10775,0.10766,0.11094,0.1073,0.11088,0.1102,0.10879,0.1125,0.10859,0.11129,0.10906,0.11173,0.10327,0.10391,0.1056,0.10341,0.10398,0.10432,0.10442,0.1036,0.10427,0.10522,0.10283,0.10421,0.10408,0.10636,0.10326,0.1028,0.10205,0.11213,0.10821,0.11012,0.1113,0.10884,0.11121,0.11253,0.10933,0.10993,0.10776,0.11051,0.10888,0.10973,0.11089,0.10887,0.10877,0.10377,0.10348,0.1032,0.10287,0.10377,0.10247,0.10394,0.10555,0.10481,0.10435,0.10446,0.10249,0.10548,0.10393,0.10409,0.10263,0.10294,0.10595,0.10316,0.10851,0.11021,0.11082,0.10908,0.10881,0.1095,0.1107,0.11068,0.10998,0.108,0.10954,0.10808,0.10996,0.10287,0.10377,0.10325,0.10323,0.1033,0.10298,0.10247,0.10377,0.10437,0.10281,0.10269,0.10327,0.10348,0.10468,0.10292,0.10422,0.10448,0.10204,0.10408,0.10218,0.10307,0.1094,0.1114,0.10859,0.1106,0.10922,0.11161,0.11055,0.10928,0.11117,0.10434,0.10363,0.10315,0.10501,0.10296,0.10424,0.10552,0.10322,0.10293,0.10327,0.10292,0.10405,0.10443,0.10453,0.10469,0.10389,0.10374,0.10385,0.10345,0.10287,0.10524,0.10447,0.10275,0.10389,0.10474,0.10887,0.10775,0.10922,0.10856,0.10377,0.1032,0.10592,0.10418,0.10347,0.10193,0.10454,0.10465,0.10374,0.10243,0.10388,0.1032,0.10342,0.10369,0.10215,0.10359,0.10482,0.10581,0.10168,0.1035,0.10414,0.10426,0.10366,0.10337,0.10324,0.1037,0.10191,0.10244,0.10357,0.10348,0.10412,0.10367,0.1035,0.10393,0.10317,0.10237,0.10399,0.10483,0.10367,0.10448,0.10348,0.10287,0.10448,0.10355,0.10341,0.10346,0.10401,0.10357,0.10372,0.10298,0.10412,0.10402,0.10381,0.10395,0.1037,0.10304,0.10502,0.10437,0.10265,0.10249,0.1044,0.10191,0.10277,0.1034,0.10391,0.10222,0.10469,0.10224,0.10323,0.10361,0.1038,0.10287,0.10312,0.10502,0.10442,0.10364,0.10438,0.10431,0.10435,0.10414,0.10551,0.10412,0.10409,0.10466,0.10424,0.10417,0.103,0.10353,0.10324,0.10338,0.10329,0.10339,0.10303,0.10358,0.10343,0.10559,0.10383,0.1036,0.10258,0.10325,0.10297,0.1027,0.10473,0.10423,0.10461,0.10558,0

.10307,0.10223,0.10342,0.10387,0.10296,0.10303,0.1032,0.10426,0.10444,  
0.10396,0.10226,0.10248,0.10331,0.10527,0.10234,0.10339,0.10383,0.1056  
2,0.1047,0.10599,0.10403,0.1044,0.10339,0.10316,0.10477,0.10362,0.1043  
7,0.10418,0.10385,0.10426,0.10174,0.10447,0.10496,0.10542,0.10393,0.10  
404,0.10238,0.10298,0.10396,0.1044,0.10348,0.10262,0.10337,0.1036,0.10  
305,0.10434,0.10217,0.10341,0.10362,0.10291,0.10341,0.10545,0.10503,0.  
10338,0.10272,0.10342,0.10384,0.10312,0.10422,0.10556,0.10411,0.1029,0  
.10391,0.10273,0.10473,0.10377,0.1025,0.10486,0.10239,0.10338,0.10312,  
0.10269,0.1036,0.10323,0.10413,0.10365,0.10349,0.10285,0.10476,0.10315  
,0.1027,0.1036,0.10334,0.10327,0.10426,0.10469,0.10461,0.10374,0.10377  
0.14408,0.14578,0.14715,0.14165,0.14423,0.14477,0.14284,0.14388,0.1458  
8,0.14049,0.14524,0.14154,0.14427,0.14137,0.14399,0.14252,0.14343,0.14  
827,0.14605,0.14194,0.63567,0.62582,0.62305,0.66814,0.14318,0.14466,0.  
13877,0.14305,0.14569,0.14246,0.14496,0.14682,0.14226,0.142,0.14595,0.  
1445,0.14604,0.14058,0.14431,1.115,0.6102,0.61611,0.62955,0.59608,0.62  
71,0.74806,0.14396,0.14408,0.14117,0.14409,0.14618,0.14482,0.14266,0.1  
4329,0.14437,0.14436,0.14461,0.14548,0.14285,0.14662,0.14148,1.1119,1.  
1331,0.70529,0.65909,0.64432,0.69348,0.6065,0.62191,0.61555,0.68377,0.  
14307,0.14471,0.1429,0.13952,0.14395,0.14411,0.14408,0.14572,0.14191,0  
.14456,0.14306,0.14334,0.14391,0.14379,0.14021,1.1401,1.137,1.1124,0.6  
443,0.63038,0.51998,0.64054,0.6656,0.67955,0.63705,0.6386,0.68203,0.14  
502,0.14454,0.14392,0.14629,0.14291,0.14646,0.14355,0.14464,0.14319,0.  
14344,0.14171,0.1435,0.14709,0.14509,0.14206,0.14562,1.1437,1.087,1.10  
56,1.1455,0.56818,0.56562,0.64997,0.61553,0.65079,0.6461,0.61416,0.651  
65,0.66966,0.57181,0.14456,0.14449,0.14097,0.14596,0.14665,0.14389,0.1  
4444,0.14211,0.14297,0.14349,0.14601,0.14532,0.14213,0.14149,0.14552,0  
.14238,1.1142,1.1302,1.0976,1.1145,1.1363,1.1234,0.66027,0.72281,0.633  
7,0.59898,0.62375,0.62759,0.64836,0.65187,0.61998,0.63177,0.14207,0.14  
527,0.14405,0.14338,0.14381,0.1425,0.14067,0.14443,0.14077,0.14484,0.1  
4709,0.14589,0.1498,0.1452,0.14594,0.14421,0.14207,1.1301,1.1153,1.122  
5,1.1154,1.1115,1.1005,0.69339,0.88711,0.60698,0.53114,0.58844,0.66472  
,0.59901,0.63578,0.63211,0.68162,0.72431,0.14534,0.14351,0.14346,0.143  
68,0.14725,0.14539,0.14058,0.14597,0.14692,0.14272,0.14116,0.14294,0.1  
4463,0.12948,0.13194,0.13058,0.14571,1.0909,1.113,1.1069,1.0959,1.1147  
,1.1379,1.118,0.63459,0.63833,0.63272,0.69442,0.65134,0.61667,0.6066,0  
.60345,0.65762,0.57399,0.53056,0.14617,0.14216,0.14382,0.14227,0.13979  
,0.14572,0.14471,0.14564,0.14361,0.14327,0.14336,0.12736,0.13046,0.127  
42,0.12598,0.1279,0.12806,0.14554,1.1131,1.1542,1.1178,1.1066,1.1215,1  
.1081,1.1311,0.64676,0.57254,0.67367,0.45251,0.60732,0.62839,0.61217,0  
.72569,0.55917,0.63419,0.5999,0.14353,0.14374,0.14026,0.14658,0.14341,  
0.14694,0.14442,0.14654,0.14336,0.12804,0.12743,0.1285,0.13079,0.12918  
,0.12698,0.12863,0.1292,0.12995,0.14321,1.1035,1.1259,1.1123,1.1267,1.  
0814,1.1064,1.0981,0.62737,0.65219,0.63131,0.57927,0.59481,0.62111,0.5  
6766,0.74067,0.61656,0.63263,0.63444,0.64238,0.14495,0.1465,0.1403,0.1  
4283,0.14326,0.14213,0.12769,0.12699,0.12952,0.13059,0.13266,0.13049,0  
.12735,0.1312,0.12972,0.13311,0.12935,0.12709,1.1276,1.1443,1.1201,1.1  
592,1.1519,1.1369,1.114,0.65006,0.62814,0.63707,0.61114,0.65037,0.6848  
,0.5765,0.63568,0.51677,0.6605,0.57228,0.69984,0.14603,0.14487,0.146,0  
.12973,0.1303,0.12813,0.12844,0.1297,0.12648,0.13385,0.1296,0.13037,0.  
12758,0.13025,0.13097,0.13009,0.12961,0.13373,1.0969,1.1108,1.1425,1.0  
921,1.1057,1.1365,1.1102,1.1257,1.1004,0.69315,0.64604,0.63622,0.63483  
,0.62985,0.58934,0.62354,0.66005,0.63709,0.61138,0.52223,0.1317,0.1300

8, 0.13069, 0.12895, 0.12739, 0.13073, 0.12791, 0.12745, 0.1276, 0.1297, 0.1296  
9, 0.12815, 0.13606, 0.12927, 0.12969, 0.1272, 0.12998, 0.12856, 1.1172, 1.1192  
, 1.1282, 1.114, 1.1409, 1.1062, 1.1305, 1.1143, 1.1341, 0.6225, 0.60144, 0.3333  
, 0.43244, 0.50366, 0.39913, 0.47872, 0.49108, 0.45515, 0.48159, 0.48178, 0.129  
49, 0.13218, 0.125, 0.12857, 0.12947, 0.12807, 0.12327, 0.12913, 0.12964, 0.130  
39, 0.12867, 0.12979, 0.12719, 0.12864, 0.12903, 0.12716, 0.13275, 0.13042, 1.1  
266, 1.1159, 1.1305, 1.1049, 1.1231, 1.1189, 1.0892, 1.1315, 1.134, 0.64595, 0.4  
9518, 0.43359, 0.52099, 0.46397, 0.45269, 0.41101, 0.49332, 0.44094, 0.48606, 0  
.47533, 0.12984, 0.12842, 0.1289, 0.13017, 0.12925, 0.13022, 0.13225, 0.1289, 0  
.13043, 0.12753, 0.12808, 0.12842, 0.12828, 0.12853, 0.1291, 0.12931, 0.12795,  
0.12843, 1.1033, 1.1275, 1.109, 1.1568, 1.1393, 1.1401, 1.1144, 0.62199, 0.5697  
5, 0.62233, 0.54314, 0.45691, 0.44379, 0.44935, 0.49331, 0.46543, 0.47307, 0.45  
432, 0.35439, 0.48403, 0.12803, 0.13077, 0.13016, 0.12918, 0.13018, 0.12954, 0.  
12118, 0.1297, 0.13262, 0.12841, 0.12807, 0.12638, 0.1306, 0.12681, 0.12977, 0.  
12956, 0.1271, 0.12673, 1.119, 1.1119, 1.1577, 1.0983, 1.1047, 1.0939, 0.60373,  
0.66728, 0.66586, 0.59147, 0.61388, 0.4607, 0.4699, 0.46249, 0.45096, 0.45233,  
0.35719, 0.46071, 0.48034, 0.45688, 0.13333, 0.12938, 0.12895, 0.127, 0.12613,  
0.13251, 0.12901, 0.12942, 0.12966, 0.12876, 0.12899, 0.12921, 0.13065, 0.1295  
2, 0.12809, 0.12779, 0.13328, 0.13176, 1.1154, 1.1307, 1.0887, 1.1279, 1.1229, 0  
.52767, 0.5859, 0.57731, 0.6498, 0.62546, 0.58291, 0.46229, 0.39589, 0.50676, 0  
.45764, 0.40146, 0.44043, 0.45848, 0.47062, 0.46255, 0.13003, 0.13002, 0.12759  
, 0.1287, 0.12928, 0.12971, 0.13097, 0.1268, 0.13156, 0.13009, 0.12834, 0.12934  
, 0.1289, 0.13059, 0.12945, 0.12826, 0.13069, 0.12884, 1.1228, 1.1374, 1.1188, 0  
.76697, 0.60647, 0.77037, 0.63921, 0.61283, 0.61852, 0.56545, 0.62774, 0.50446  
, 0.48087, 0.48047, 0.47484, 0.46919, 0.53187, 0.48869, 0.46653, 0.54831, 0.129  
39, 0.1283, 0.12869, 0.13053, 0.12821, 0.13188, 0.12901, 0.12765, 0.13025, 0.12  
594, 0.13309, 0.12987, 0.13113, 0.12754, 0.13223, 0.12991, 0.12957, 0.12836, 1.  
1271, 0.61077, 0.56741, 0.58439, 0.65878, 0.68885, 0.60717, 0.57207, 0.63548, 0  
.68589, 0.45811, 0.48004, 0.48626, 0.45617, 0.54344, 0.40947, 0.38381, 0.48469  
, 0.44997, 0.12825, 0.12813, 0.12698, 0.13033, 0.13059, 0.12767, 0.12988, 0.129  
57, 0.12765, 0.12981, 0.12758, 0.1312, 0.13104, 0.12911, 0.12794, 0.12741, 0.13  
088, 0.11352, 0.58548, 0.63016, 0.51542, 0.60838, 0.63655, 0.67732, 0.55229, 0.  
66261, 0.62771, 0.55667, 0.46151, 0.46022, 0.43386, 0.46191, 0.36937, 0.45424,  
0.52765, 0.45732, 0.45738, 0.12643, 0.1297, 0.12871, 0.12793, 0.12881, 0.12934  
, 0.12929, 0.1305, 0.12904, 0.12922, 0.12957, 0.12631, 0.12602, 0.12774, 0.1270  
6, 0.1282, 0.12883, 0.11423, 0.59775, 0.62589, 0.58065, 0.37603, 0.62872, 0.615  
89, 0.62846, 0.66382, 0.67225, 0.61683, 0.4752, 0.48309, 0.42513, 0.48074, 0.40  
559, 0.47745, 0.43234, 0.48765, 0.12964, 0.12753, 0.12637, 0.12924, 0.12869, 0.  
13059, 0.1275, 0.13054, 0.12803, 0.12647, 0.12335, 0.12866, 0.1282, 0.12888, 0.  
12604, 0.12615, 0.12722, 0.12865, 0.1147, 0.66096, 0.61058, 0.61393, 0.5858, 0.  
60804, 0.62911, 0.63418, 0.62814, 0.51408, 0.63935, 0.50463, 0.4554, 0.4224, 0.  
43232, 0.52392, 0.46342, 0.37538, 0.53134, 0.12872, 0.12815, 0.12915, 0.12873,  
0.13063, 0.13033, 0.13011, 0.12766, 0.12837, 0.13167, 0.12537, 0.12784, 0.1245  
5, 0.13036, 0.13068, 0.12855, 0.13019, 0.11439, 0.11472, 0.11359, 0.58909, 0.71  
143, 0.58734, 0.62865, 0.55003, 0.60462, 0.4959, 0.54631, 0.64828, 0.52174, 0.4  
0461, 0.56495, 0.53445, 0.47495, 0.44659, 0.13015, 0.12951, 0.13144, 0.12812, 0  
.12705, 0.13283, 0.12856, 0.1292, 0.12805, 0.1314, 0.12652, 0.12719, 0.13037, 0  
.13369, 0.13047, 0.12916, 0.12953, 0.12819, 0.11298, 0.11289, 0.11415, 0.1148,  
0.62961, 0.63996, 0.60644, 0.27282, 0.64008, 0.63134, 0.46559, 0.67928, 0.6155  
6, 0.45239, 0.47109, 0.44316, 0.13115, 0.12606, 0.13142, 0.12918, 0.12789, 0.13  
128, 0.12778, 0.12807, 0.12898, 0.12714, 0.13289, 0.13015, 0.12877, 0.13019, 0.  
12536, 0.12891, 0.13048, 0.13029, 0.13199, 0.12914, 0.11392, 0.11327, 0.11318,

0.11412,0.11501,0.11377,0.61657,0.66149,0.55417,0.47076,0.65652,0.6968  
4,0.62335,0.52128,0.13144,0.12486,0.13003,0.13024,0.1294,0.13276,0.128  
25,0.127,0.12902,0.13026,0.12743,0.13048,0.12791,0.12778,0.1312,0.1310  
7,0.12726,0.12967,0.13578,0.1292,0.13107,0.12823,0.13126,0.11456,0.114  
15,0.11341,0.11518,0.11361,0.11251,0.6258,0.67516,0.42874,0.56068,0.65  
421,0.11507,0.11441,0.12959,0.12733,0.13276,0.12892,0.13055,0.13061,0.  
12943,0.13291,0.13132,0.12886,0.12733,0.12949,0.12672,0.12518,0.12972,  
0.13461,0.13109,0.13078,0.12852,0.12989,0.12953,0.11541,0.11353,0.1162  
5,0.11536,0.11325,0.11565,0.11388,0.11503,0.11515,0.11443,0.61629,0.63  
885,0.11452,0.11442,0.11385,0.11527,0.12691,0.13014,0.13234,0.1335,0.1  
2916,0.12829,0.13047,0.12772,0.12576,0.12902,0.12441,0.13088,0.12952,0  
.12808,0.13471,0.12772,0.13063,0.12831,0.13008,0.1138,0.11537,0.11517,  
0.11413,0.11494,0.11419,0.1146,0.11383,0.11475,0.11672,0.11358,0.11475  
,0.11441,0.1165,0.11382,0.11426,0.11252,0.13171,0.12738,0.12851,0.1322  
3,0.12682,0.13018,0.13484,0.12776,0.12988,0.12598,0.13012,0.12817,0.12  
798,0.13036,0.12772,0.12858,0.11398,0.11471,0.11382,0.1141,0.11433,0.1  
1386,0.11594,0.1162,0.11512,0.11502,0.11512,0.11313,0.11629,0.11415,0.  
11468,0.11282,0.11313,0.11651,0.11421,0.12522,0.12904,0.13053,0.1286,0  
.12885,0.12895,0.13043,0.12995,0.12931,0.12799,0.12884,0.12829,0.12928  
,0.11373,0.11436,0.11424,0.11377,0.11365,0.1139,0.11397,0.11454,0.1150  
9,0.11359,0.11307,0.11404,0.11433,0.11592,0.11298,0.11461,0.11529,0.11  
331,0.11427,0.11332,0.11368,0.13039,0.12971,0.12803,0.12995,0.12754,0.  
13123,0.13215,0.12973,0.13036,0.11495,0.11416,0.11354,0.11576,0.11406,  
0.11417,0.11542,0.11396,0.11358,0.1149,0.11419,0.11471,0.1153,0.11514,  
0.11565,0.11427,0.11448,0.11488,0.11449,0.11347,0.11595,0.11463,0.1129  
9,0.11584,0.11594,0.12702,0.12751,0.12642,0.1263,0.11447,0.11394,0.116  
73,0.1148,0.11488,0.11273,0.11544,0.11485,0.1138,0.11356,0.11467,0.113  
14,0.11346,0.11437,0.11358,0.11407,0.11539,0.11581,0.11182,0.11369,0.1  
1446,0.11477,0.11428,0.11377,0.11371,0.11432,0.11307,0.11329,0.11468,0  
.11409,0.11509,0.11456,0.11424,0.11424,0.11416,0.11305,0.11499,0.11555  
,0.11473,0.11538,0.11375,0.11464,0.11494,0.11447,0.11404,0.11408,0.114  
88,0.11439,0.11459,0.11395,0.11452,0.11489,0.1142,0.11454,0.11428,0.11  
418,0.11531,0.11481,0.11272,0.11313,0.11469,0.11244,0.11383,0.11399,0.  
1145,0.1128,0.11526,0.11307,0.11356,0.11499,0.115,0.1132,0.11359,0.115  
72,0.11468,0.11411,0.1149,0.11477,0.11488,0.1148,0.11643,0.11439,0.114  
16,0.1155,0.11498,0.11485,0.11419,0.11502,0.11306,0.11317,0.11438,0.11  
385,0.11396,0.11409,0.11419,0.1164,0.11411,0.11401,0.11329,0.11381,0.1  
14,0.11416,0.11504,0.11538,0.11521,0.11532,0.11404,0.11322,0.11416,0.1  
1462,0.1132,0.11362,0.11337,0.11514,0.11504,0.11487,0.11351,0.11391,0.  
11411,0.11579,0.11305,0.11389,0.11454,0.11641,0.11521,0.11636,0.11499,  
0.11495,0.11403,0.11368,0.11491,0.114,0.11429,0.11439,0.11423,0.11496,  
0.1128,0.11524,0.11574,0.11618,0.11467,0.11479,0.1135,0.11425,0.11503,  
0.11533,0.11399,0.11281,0.11399,0.11424,0.11323,0.11521,0.11344,0.1144  
6,0.11398,0.11414,0.11385,0.11581,0.11532,0.11399,0.11386,0.11437,0.11  
461,0.11331,0.11428,0.1157,0.11372,0.11378,0.11482,0.11364,0.11506,0.1  
1465,0.11351,0.11539,0.11345,0.11372,0.11372,0.11244,0.11405,0.11397,0  
.11492,0.11486,0.11444,0.11321,0.11589,0.11378,0.11335,0.11382,0.11375  
,0.11376,0.11512,0.11509,0.11581,0.11409,0.11447  
0.16202,0.1635,0.16535,0.16027,0.16214,0.16123,0.16178,0.16188,0.16331  
,0.1592,0.16262,0.15901,0.16206,0.15909,0.16189,0.16051,0.16168,0.1660  
7,0.16471,0.16056,0.49307,0.49497,0.49209,0.51432,0.16109,0.16225,0.15  
62,0.16067,0.16425,0.15934,0.16351,0.16454,0.1604,0.16044,0.16325,0.16

312,0.16333,0.15897,0.16232,0.827,0.47895,0.48475,0.49467,0.46913,0.49  
179,0.5792,0.16177,0.16149,0.15835,0.16116,0.16422,0.16323,0.15966,0.1  
6098,0.16143,0.16263,0.16412,0.16276,0.16088,0.1662,0.15909,0.81281,0.  
83757,0.55178,0.51841,0.49864,0.53717,0.47711,0.48578,0.48338,0.53145,  
0.16123,0.1624,0.16131,0.15779,0.1628,0.16063,0.16184,0.16327,0.1607,0  
.16221,0.16033,0.16078,0.16171,0.16083,0.15772,0.85188,0.82822,0.81743  
,0.50486,0.49348,0.41782,0.51412,0.52596,0.5235,0.49521,0.49788,0.5304  
,0.1627,0.16218,0.16199,0.16437,0.16133,0.16418,0.16129,0.16314,0.1609  
2,0.16132,0.15891,0.15993,0.16469,0.16224,0.15998,0.16337,0.84528,0.79  
497,0.82189,0.85225,0.44589,0.44812,0.50809,0.48935,0.50979,0.50977,0.  
48434,0.50918,0.52903,0.45407,0.16183,0.16401,0.1591,0.16347,0.16529,0  
.16177,0.16373,0.16015,0.1618,0.16151,0.16533,0.16394,0.16,0.15998,0.1  
6308,0.16019,0.81419,0.83799,0.8111,0.8189,0.84504,0.84148,0.51604,0.5  
5466,0.49974,0.47248,0.47674,0.48773,0.50208,0.50954,0.48266,0.49354,0  
.15825,0.16311,0.16122,0.16153,0.16135,0.1625,0.15824,0.16198,0.15804,  
0.16283,0.16491,0.16297,0.16756,0.16342,0.16307,0.16252,0.16016,0.8329  
2,0.81545,0.82284,0.81681,0.82297,0.81677,0.5418,0.6678,0.47954,0.4267  
5,0.4629,0.51251,0.46587,0.49889,0.4958,0.53014,0.56198,0.16349,0.1615  
3,0.16142,0.1619,0.16413,0.16312,0.15881,0.16298,0.16483,0.15997,0.157  
61,0.15888,0.163,0.13796,0.14121,0.13977,0.1632,0.79772,0.81583,0.8197  
,0.80085,0.83061,0.83889,0.83371,0.49501,0.49614,0.49431,0.53805,0.508  
37,0.48425,0.48692,0.48155,0.51842,0.45827,0.42932,0.16447,0.16032,0.1  
6224,0.1601,0.1577,0.16454,0.16124,0.16308,0.16134,0.16112,0.16211,0.1  
3467,0.14,0.13683,0.13321,0.135,0.13734,0.16297,0.81674,0.8599,0.82775  
,0.80299,0.82797,0.83102,0.83066,0.49983,0.45429,0.52448,0.37506,0.485  
85,0.49432,0.47981,0.55625,0.44893,0.49691,0.47801,0.16163,0.16139,0.1  
585,0.16416,0.16102,0.16468,0.16218,0.16366,0.16277,0.13534,0.13581,0.  
13732,0.13782,0.1383,0.13393,0.1378,0.13844,0.1379,0.16065,0.82085,0.8  
1442,0.82895,0.83759,0.78945,0.82386,0.80996,0.4913,0.51491,0.50093,0.  
45826,0.47381,0.4907,0.44837,0.57519,0.48283,0.49845,0.48969,0.50336,0  
.1635,0.16391,0.15932,0.15982,0.16261,0.15993,0.13519,0.13493,0.13935,  
0.14052,0.14231,0.13964,0.13617,0.14143,0.13836,0.14362,0.13675,0.1358  
8,0.83539,0.84458,0.83012,0.86567,0.86616,0.85507,0.81993,0.50438,0.48  
828,0.49408,0.48063,0.50717,0.53016,0.46146,0.49915,0.41949,0.51792,0.  
45291,0.5416,0.16217,0.16227,0.1638,0.13875,0.13913,0.13786,0.13687,0.  
1397,0.1351,0.14478,0.13872,0.14151,0.13611,0.13794,0.14072,0.13922,0.  
13773,0.14452,0.81908,0.82017,0.84998,0.79964,0.82409,0.85273,0.81089,  
0.82185,0.82097,0.53945,0.50411,0.49598,0.49763,0.49288,0.46948,0.4859  
2,0.51159,0.50044,0.48075,0.4192,0.14181,0.13972,0.13843,0.13813,0.135  
12,0.13982,0.13648,0.13552,0.13698,0.13941,0.13749,0.13564,0.14829,0.1  
379,0.13928,0.13494,0.13877,0.13657,0.82115,0.8264,0.83731,0.83373,0.8  
4206,0.81231,0.83952,0.82669,0.83059,0.48648,0.47327,0.28285,0.35135,0  
.40093,0.32382,0.38144,0.38755,0.36538,0.38383,0.38219,0.1365,0.14188,  
0.13131,0.13662,0.13761,0.13679,0.12946,0.13746,0.13875,0.13956,0.1375  
9,0.13838,0.13551,0.13785,0.13763,0.13535,0.14473,0.13985,0.8363,0.820  
14,0.83934,0.82394,0.82651,0.82942,0.79932,0.84858,0.81327,0.48557,0.3  
9247,0.34665,0.41478,0.37419,0.36599,0.33348,0.38876,0.35363,0.38926,0  
.38094,0.14013,0.13638,0.13783,0.13832,0.13876,0.1394,0.14304,0.13862,  
0.13804,0.13435,0.13666,0.13783,0.13648,0.13812,0.13842,0.13795,0.1358  
5,0.13693,0.82322,0.83249,0.82007,0.86884,0.84781,0.85728,0.83251,0.47  
622,0.434,0.47213,0.42519,0.366,0.35428,0.36006,0.39002,0.37272,0.3775  
4,0.3625,0.29354,0.38392,0.13597,0.13958,0.13958,0.13829,0.14022,0.138

35,0.12469,0.13883,0.1431,0.13706,0.13733,0.1335,0.13898,0.1346,0.1393  
5,0.1383,0.13564,0.13518,0.82751,0.8198,0.85979,0.80789,0.81737,0.7961  
1,0.45623,0.50852,0.5005,0.44591,0.46564,0.36958,0.38099,0.37307,0.364  
47,0.36491,0.29918,0.37281,0.38242,0.36573,0.14433,0.13824,0.13764,0.1  
3484,0.13387,0.14131,0.13807,0.13664,0.13878,0.13732,0.13794,0.13763,0  
.13884,0.13885,0.13741,0.13792,0.1441,0.14095,0.81378,0.84416,0.80339,  
0.83154,0.83026,0.39727,0.44267,0.44134,0.49733,0.47522,0.44491,0.3735  
1,0.32265,0.39552,0.37052,0.32896,0.34907,0.37132,0.37775,0.36908,0.13  
862,0.13828,0.13563,0.13645,0.13893,0.1391,0.14049,0.13376,0.1411,0.13  
921,0.13657,0.13761,0.13719,0.14006,0.13784,0.13676,0.13977,0.13836,0.  
82976,0.82045,0.82067,0.57881,0.46439,0.5886,0.49112,0.47391,0.48082,0  
.43368,0.48095,0.39801,0.38205,0.37945,0.38137,0.37308,0.41737,0.38495  
,0.37507,0.43028,0.13875,0.13715,0.13852,0.13958,0.13672,0.14292,0.138  
43,0.1357,0.13955,0.13303,0.14225,0.13893,0.14017,0.13504,0.14256,0.13  
98,0.1378,0.13744,0.83585,0.46399,0.43784,0.44267,0.49337,0.53112,0.46  
852,0.42909,0.48941,0.52399,0.37052,0.3843,0.38486,0.36577,0.4265,0.32  
868,0.31606,0.38876,0.36067,0.13731,0.13777,0.13338,0.14012,0.13956,0.  
13683,0.13969,0.13809,0.1348,0.13868,0.1357,0.13974,0.13968,0.13843,0.  
13721,0.1349,0.14088,0.11304,0.45647,0.48199,0.40016,0.46819,0.48694,0  
.51154,0.42653,0.50188,0.48114,0.42833,0.37123,0.37178,0.34773,0.36959  
,0.30753,0.36353,0.41743,0.36029,0.36992,0.13447,0.13821,0.13837,0.135  
44,0.1371,0.13881,0.13708,0.13962,0.13721,0.13729,0.13888,0.13313,0.13  
537,0.13635,0.13518,0.13607,0.13871,0.11358,0.45988,0.48339,0.44546,0.  
30478,0.47605,0.47066,0.47979,0.50312,0.50718,0.47156,0.38086,0.38479,  
0.34133,0.38346,0.33222,0.38235,0.34763,0.38712,0.13798,0.1357,0.13451  
,0.13764,0.13734,0.13918,0.13651,0.14061,0.13563,0.13349,0.12893,0.136  
92,0.13576,0.13819,0.13352,0.13365,0.13457,0.1387,0.1141,0.50893,0.467  
67,0.46037,0.4505,0.45877,0.48198,0.46976,0.48624,0.39787,0.48271,0.39  
996,0.36421,0.33925,0.34958,0.41484,0.37317,0.30528,0.42399,0.13832,0.  
13674,0.13816,0.13683,0.14009,0.13976,0.1405,0.13595,0.13726,0.14068,0  
.13147,0.13774,0.13135,0.13979,0.13976,0.13455,0.13951,0.11374,0.11457  
,0.11313,0.45328,0.5337,0.44808,0.48686,0.41494,0.46124,0.38877,0.4087  
1,0.49385,0.41487,0.32969,0.43718,0.41915,0.37598,0.35573,0.13976,0.13  
827,0.1404,0.1361,0.13379,0.14232,0.13699,0.1396,0.13667,0.14123,0.135  
09,0.1356,0.13822,0.14384,0.14132,0.13832,0.13841,0.13726,0.11304,0.11  
198,0.11366,0.11469,0.47947,0.49918,0.46442,0.22714,0.49229,0.4859,0.3  
6306,0.52548,0.46106,0.36034,0.37719,0.35781,0.14136,0.1329,0.13833,0.  
13787,0.13726,0.14181,0.136,0.13621,0.13747,0.1358,0.14266,0.14118,0.1  
3748,0.1389,0.13251,0.13808,0.13846,0.13897,0.1413,0.13829,0.11389,0.1  
1291,0.11258,0.11293,0.1146,0.1135,0.47204,0.50215,0.42854,0.36885,0.4  
9923,0.53259,0.47424,0.40386,0.14048,0.13182,0.13996,0.1385,0.1382,0.1  
4463,0.13702,0.13472,0.13875,0.13932,0.13575,0.13867,0.13739,0.13537,0  
.13987,0.13977,0.13457,0.13823,0.14766,0.13777,0.1392,0.13677,0.14079,  
0.11399,0.11353,0.11273,0.11483,0.11295,0.11229,0.48312,0.5149,0.33738  
,0.42982,0.49341,0.11444,0.11347,0.13841,0.13518,0.14385,0.13794,0.139  
38,0.13941,0.13809,0.14142,0.14073,0.13716,0.13563,0.13882,0.13334,0.1  
3341,0.13914,0.14408,0.14142,0.14173,0.13687,0.14016,0.13596,0.11539,0  
.1127,0.11541,0.11434,0.11316,0.11521,0.11384,0.11442,0.11471,0.11424,  
0.46877,0.48924,0.11414,0.11481,0.11387,0.11438,0.13558,0.13864,0.1416  
1,0.14517,0.13733,0.13601,0.13993,0.13754,0.13328,0.1371,0.13068,0.141  
,0.13913,0.13728,0.14541,0.13651,0.13943,0.13728,0.1381,0.11375,0.1142  
8,0.11474,0.11434,0.11416,0.11351,0.11476,0.11344,0.11421,0.11676,0.11

319,0.11464,0.11402,0.1161,0.11332,0.11329,0.11252,0.14039,0.1366,0.13789,0.14148,0.13426,0.13784,0.14768,0.1368,0.13842,0.13406,0.13956,0.13743,0.13605,0.1391,0.13659,0.13737,0.11352,0.11407,0.11338,0.11358,0.11397,0.11369,0.11471,0.1154,0.11463,0.11407,0.11416,0.11274,0.116,0.11373,0.11411,0.11295,0.11325,0.11586,0.11424,0.13243,0.13751,0.13992,0.13888,0.13786,0.13774,0.13999,0.13833,0.13861,0.13699,0.138,0.13588,0.13943,0.11356,0.11363,0.11439,0.11303,0.11303,0.11395,0.11352,0.11382,0.11462,0.11334,0.11322,0.11298,0.1135,0.11535,0.11275,0.11443,0.11512,0.11285,0.11418,0.1132,0.11351,0.14091,0.13753,0.13659,0.13798,0.13543,0.14075,0.14296,0.14031,0.13888,0.11449,0.11381,0.11347,0.11522,0.11336,0.11371,0.11499,0.11344,0.11314,0.11384,0.11391,0.11457,0.11499,0.11478,0.11447,0.1138,0.11387,0.11385,0.11454,0.1134,0.11573,0.11404,0.11245,0.11509,0.11552,0.13458,0.1367,0.13209,0.1351,0.1138,0.1135,0.11573,0.11418,0.11439,0.11259,0.11451,0.11457,0.11307,0.1132,0.11382,0.11283,0.11288,0.11391,0.11309,0.11264,0.11507,0.11518,0.11113,0.11294,0.11359,0.11354,0.11416,0.1139,0.11259,0.11342,0.11331,0.11283,0.11455,0.11378,0.11522,0.11418,0.11356,0.1133,0.11297,0.11259,0.11494,0.11497,0.11447,0.1148,0.11336,0.11448,0.11434,0.1141,0.11412,0.1135,0.11415,0.11306,0.11425,0.11379,0.11421,0.11458,0.11389,0.11411,0.11386,0.11419,0.11463,0.1137,0.11309,0.11272,0.11426,0.11212,0.11345,0.11347,0.11409,0.11233,0.11432,0.11307,0.11267,0.11404,0.11457,0.11256,0.1135,0.11501,0.11449,0.11313,0.11485,0.11462,0.1146,0.11427,0.11588,0.11362,0.11302,0.1152,0.11474,0.11422,0.11373,0.11479,0.11237,0.11297,0.11427,0.11436,0.11309,0.11318,0.11394,0.1157,0.11382,0.11365,0.11301,0.11328,0.11366,0.114,0.11466,0.11518,0.1146,0.11448,0.1137,0.11359,0.11409,0.11383,0.11288,0.11275,0.11259,0.11518,0.11443,0.11404,0.11241,0.11348,0.114,0.11533,0.11344,0.11388,0.11433,0.1158,0.11456,0.11569,0.11395,0.11463,0.11352,0.1129,0.11435,0.11365,0.11349,0.11385,0.11417,0.1149,0.11266,0.1143,0.11521,0.1154,0.11338,0.11495,0.11289,0.11356,0.11469,0.11468,0.11426,0.11313,0.11391,0.11415,0.11234,0.11458,0.11317,0.11434,0.11367,0.11378,0.11333,0.11562,0.11512,0.11363,0.11368,0.11417,0.11401,0.11346,0.11368,0.11582,0.11385,0.1134,0.11407,0.11289,0.1152,0.11467,0.11351,0.11417,0.11344,0.1129,0.11336,0.11186,0.11374,0.11353,0.1142,0.11496,0.11447,0.11287,0.1152,0.11302,0.11322,0.11331,0.11297,0.11381,0.11403,0.11476,0.11497,0.11326,0.11362  
0.17478,0.17464,0.17651,0.17051,0.17395,0.1717,0.1735,0.17386,0.17534,0.1711,0.17394,0.17002,0.17407,0.17152,0.17422,0.17321,0.17341,0.17694,0.17513,0.17297,0.41698,0.41748,0.40869,0.42806,0.1733,0.17395,0.16902,0.17282,0.17628,0.17161,0.17566,0.17521,0.17274,0.17246,0.17478,0.17451,0.17651,0.17065,0.17381,0.65722,0.40244,0.40187,0.41133,0.38848,0.40244,0.48266,0.17304,0.17369,0.16934,0.17372,0.17563,0.17439,0.17113,0.17303,0.17302,0.17425,0.17515,0.17383,0.17266,0.17724,0.17067,0.64221,0.66937,0.45296,0.42529,0.40529,0.43799,0.39833,0.40067,0.40542,0.44535,0.17286,0.17426,0.17375,0.171,0.17423,0.17294,0.17407,0.17434,0.17186,0.17293,0.17059,0.17252,0.17305,0.17231,0.17024,0.67501,0.647,0.62885,0.41796,0.41462,0.35181,0.42748,0.43269,0.442,0.40945,0.41107,0.43281,0.17317,0.1737,0.17442,0.17533,0.17313,0.17525,0.17241,0.1743,0.17455,0.17181,0.16966,0.17158,0.17558,0.17327,0.17119,0.17364,0.65814,0.624,0.65684,0.67446,0.37361,0.38167,0.42145,0.40656,0.42716,0.42427,0.40249,0.42975,0.43949,0.39117,0.17308,0.17567,0.17144,0.17471,0.17733,0.17283,0.17593,0.17203,0.1731,0.17375,0.17557,0.17639,0.17037,0.17266,0.17504,0.1735,0.64607,0.65679,0.62679,0.63807,0.67704,0.66522,0.4276



7,0.45278,0.4187,0.39473,0.39287,0.40915,0.41304,0.42191,0.39498,0.412  
19,0.17171,0.17479,0.17346,0.17244,0.17193,0.1743,0.16792,0.173,0.1710  
7,0.1753,0.17624,0.17519,0.17927,0.17435,0.17423,0.17367,0.17274,0.662  
87,0.63377,0.63489,0.64515,0.65287,0.63507,0.44684,0.53728,0.40201,0.3  
6134,0.38534,0.42943,0.39068,0.42029,0.41803,0.4348,0.46434,0.17439,0.  
1722,0.17558,0.17431,0.17563,0.17624,0.17171,0.17388,0.17644,0.17102,0  
.16964,0.17159,0.1729,0.14079,0.14361,0.14447,0.1754,0.626,0.62216,0.6  
3323,0.62682,0.64393,0.65171,0.6589,0.41335,0.41613,0.41059,0.44253,0.  
42557,0.40118,0.40873,0.39914,0.43331,0.38635,0.36833,0.1755,0.17155,0  
.1743,0.17235,0.16901,0.17396,0.17355,0.17459,0.17312,0.17474,0.17402,  
0.13627,0.14361,0.13977,0.13366,0.13633,0.13987,0.17362,0.63061,0.6923  
7,0.64872,0.61671,0.65192,0.65929,0.66595,0.41441,0.38355,0.43239,0.32  
314,0.41028,0.4169,0.39944,0.44684,0.38788,0.4132,0.40145,0.17262,0.17  
2,0.1695,0.17618,0.17212,0.17552,0.17513,0.17549,0.17336,0.13737,0.138  
03,0.13957,0.14044,0.14047,0.13502,0.14094,0.1415,0.14012,0.17403,0.65  
489,0.64112,0.6483,0.66482,0.61797,0.6601,0.64963,0.40617,0.42703,0.41  
516,0.38839,0.39736,0.4088,0.37448,0.46994,0.39898,0.4157,0.40948,0.41  
438,0.17615,0.17592,0.17053,0.1707,0.17379,0.16975,0.137,0.13863,0.142  
46,0.14452,0.14655,0.14337,0.13906,0.14492,0.14129,0.14887,0.13959,0.1  
3885,0.67401,0.65443,0.64907,0.68703,0.68637,0.66121,0.63971,0.42103,0  
.40529,0.41215,0.4027,0.42201,0.44411,0.39162,0.41022,0.35853,0.43207,  
0.38478,0.44414,0.17323,0.17399,0.17574,0.14175,0.14238,0.14065,0.1402  
7,0.14302,0.13957,0.15072,0.14109,0.1467,0.13879,0.14009,0.1443,0.1413  
,0.14004,0.14848,0.63414,0.64119,0.6759,0.63535,0.64719,0.67554,0.6594  
7,0.66069,0.64566,0.44466,0.41575,0.41624,0.41889,0.41187,0.39412,0.40  
363,0.42131,0.41949,0.39979,0.35858,0.1449,0.14432,0.14134,0.14186,0.1  
3704,0.14334,0.13952,0.13822,0.14109,0.14311,0.14054,0.13749,0.15474,0  
.14041,0.14277,0.13723,0.14191,0.1395,0.64788,0.63495,0.6643,0.67033,0  
.6631,0.63388,0.66414,0.63577,0.65798,0.40477,0.39882,0.24839,0.29998,  
0.34011,0.28227,0.32315,0.32441,0.30845,0.32657,0.31687,0.13871,0.1464  
6,0.13317,0.13891,0.14001,0.14008,0.12946,0.13994,0.14125,0.14246,0.14  
106,0.14163,0.13809,0.1409,0.14072,0.13725,0.15,0.14276,0.65876,0.6352  
,0.65437,0.64277,0.64893,0.64434,0.62946,0.6586,0.63174,0.39585,0.3308  
2,0.29298,0.35222,0.31273,0.31457,0.28629,0.32885,0.29973,0.32942,0.31  
714,0.14511,0.139,0.14023,0.14072,0.14247,0.14384,0.14804,0.14145,0.14  
045,0.13554,0.13893,0.14205,0.1385,0.14162,0.14108,0.14058,0.13857,0.1  
411,0.65065,0.67291,0.65296,0.68266,0.67292,0.67598,0.65059,0.3823,0.3  
4202,0.38316,0.34552,0.31027,0.30257,0.30358,0.32312,0.31281,0.3212,0.  
31213,0.25383,0.32034,0.13784,0.14278,0.1424,0.1419,0.1442,0.14165,0.1  
2341,0.14181,0.14765,0.13957,0.14094,0.13619,0.14149,0.13801,0.1434,0.  
14072,0.1388,0.13646,0.65268,0.65031,0.67151,0.62854,0.65122,0.63121,0  
.36271,0.41663,0.39416,0.36125,0.37068,0.30932,0.32137,0.31272,0.31147  
,0.31281,0.25857,0.31786,0.32409,0.31386,0.14883,0.14126,0.14011,0.136  
92,0.13607,0.14511,0.14166,0.1388,0.14181,0.14038,0.14132,0.14038,0.14  
151,0.14249,0.14058,0.14213,0.14977,0.1453,0.62817,0.66131,0.63323,0.6  
4877,0.66088,0.32369,0.35599,0.35435,0.40217,0.38011,0.3613,0.31323,0.  
27977,0.33078,0.31142,0.28296,0.2907,0.31351,0.3171,0.31241,0.14166,0.  
14073,0.1389,0.13827,0.14205,0.14208,0.14507,0.13523,0.14593,0.1421,0.  
14005,0.14166,0.14015,0.14375,0.14094,0.13963,0.14465,0.14224,0.65449,  
0.66072,0.64114,0.45541,0.37396,0.47126,0.40506,0.37625,0.39152,0.3482  
6,0.37987,0.33203,0.32185,0.31634,0.32092,0.31077,0.3458,0.32887,0.312  
6,0.36405,0.14237,0.13986,0.14221,0.14191,0.13953,0.14674,0.14203,0.13

921,0.14485,0.13464,0.14771,0.14156,0.14499,0.13713,0.14814,0.14376,0.14106,0.14048,0.6568,0.37128,0.35261,0.35802,0.3998,0.4232,0.37631,0.34751,0.39455,0.42321,0.3164,0.32041,0.32216,0.30875,0.35772,0.2815,0.27436,0.32599,0.30284,0.14076,0.13952,0.13535,0.14445,0.14111,0.14028,0.14285,0.14182,0.137,0.14214,0.13805,0.14261,0.14368,0.14159,0.14028,0.13726,0.14498,0.10764,0.37293,0.39211,0.32638,0.37657,0.39476,0.41714,0.35327,0.40446,0.38549,0.34422,0.31166,0.31414,0.29599,0.30655,0.26621,0.30347,0.35627,0.30519,0.31602,0.13594,0.14073,0.14129,0.13769,0.14042,0.14242,0.13938,0.14304,0.14018,0.14091,0.14132,0.13373,0.13799,0.13972,0.13726,0.1376,0.14129,0.10854,0.37248,0.3801,0.3585,0.25534,0.38289,0.37947,0.38316,0.40753,0.41434,0.37656,0.32386,0.32264,0.28763,0.32266,0.28302,0.32107,0.29727,0.3199,0.14126,0.13983,0.13754,0.14065,0.14098,0.14161,0.13905,0.14502,0.13762,0.13466,0.12922,0.1389,0.13784,0.14178,0.13542,0.13564,0.13783,0.14208,0.10867,0.4068,0.37952,0.36445,0.36375,0.37324,0.39142,0.36881,0.38829,0.32961,0.38672,0.34056,0.30829,0.28939,0.29226,0.34647,0.31639,0.26604,0.3471,0.14189,0.14041,0.14151,0.13957,0.14391,0.143,0.14365,0.13866,0.14082,0.14571,0.13187,0.14128,0.13163,0.14456,0.14232,0.13641,0.14187,0.10835,0.10835,0.10791,0.36629,0.43328,0.36242,0.39661,0.33133,0.37075,0.31773,0.33292,0.39672,0.3437,0.28447,0.36119,0.34653,0.31633,0.30041,0.1446,0.14089,0.14347,0.13978,0.13409,0.1464,0.13937,0.14351,0.13978,0.14546,0.13812,0.13883,0.14175,0.14827,0.14598,0.14122,0.14253,0.14,0.10796,0.10664,0.10774,0.10931,0.38708,0.40347,0.37915,0.19472,0.3917,0.39259,0.29167,0.42835,0.37536,0.30391,0.31482,0.30544,0.14593,0.13485,0.14026,0.14052,0.1407,0.14662,0.13886,0.13814,0.14035,0.13896,0.14748,0.14491,0.14045,0.14136,0.13318,0.1421,0.1414,0.14216,0.1453,0.14211,0.10741,0.10649,0.10731,0.10708,0.10859,0.10852,0.37878,0.39596,0.35102,0.30409,0.39588,0.42552,0.38011,0.32785,0.1437,0.13261,0.14357,0.14143,0.14045,0.15018,0.14003,0.13743,0.1431,0.14211,0.13883,0.14148,0.14085,0.13717,0.14288,0.14306,0.1368,0.14143,0.15354,0.14075,0.14232,0.13986,0.14535,0.10756,0.10817,0.1077,0.10894,0.10727,0.10683,0.39357,0.41141,0.27633,0.35062,0.39169,0.10961,0.10785,0.1424,0.13676,0.14921,0.14066,0.14266,0.14208,0.14091,0.14502,0.1434,0.14014,0.13891,0.14295,0.13433,0.13431,0.14255,0.14952,0.14585,0.14628,0.13998,0.14491,0.13754,0.10958,0.10718,0.1092,0.10939,0.10792,0.10931,0.10761,0.1094,0.10895,0.10834,0.37968,0.393,0.10806,0.1091,0.10824,0.10882,0.13822,0.14103,0.1447,0.15044,0.1398,0.13847,0.1439,0.14228,0.13504,0.14068,0.13104,0.14505,0.14246,0.14018,0.15016,0.13949,0.14256,0.14003,0.14142,0.1078,0.10885,0.10881,0.10799,0.10909,0.1083,0.10869,0.10723,0.10863,0.11071,0.10768,0.10882,0.10769,0.11069,0.10778,0.10767,0.10655,0.14323,0.14009,0.14119,0.14554,0.13612,0.14103,0.15333,0.13951,0.14146,0.13667,0.14259,0.14083,0.13835,0.14299,0.1389,0.14058,0.10808,0.10815,0.10758,0.10774,0.10821,0.10813,0.10882,0.10927,0.10916,0.10815,0.10845,0.10749,0.11008,0.10819,0.10924,0.10784,0.10739,0.10925,0.10825,0.13292,0.14003,0.14237,0.1432,0.14072,0.14072,0.14399,0.14085,0.14097,0.13887,0.14043,0.13823,0.14254,0.108,0.10793,0.1089,0.10736,0.1078,0.10825,0.10755,0.10776,0.10944,0.10836,0.10725,0.10773,0.10767,0.10938,0.10712,0.10881,0.10937,0.1081,0.10853,0.10756,0.10785,0.14516,0.13921,0.1403,0.13998,0.13622,0.14526,0.14761,0.14407,0.1411,0.10847,0.10821,0.10812,0.10927,0.10763,0.10842,0.10926,0.10719,0.1074,0.10713,0.10878,0.10902,0.10898,0.10891,0.10904,0.10862,0.10825,0.10791,0.109,0.1072,0.10993,0.10826,0.10704,0.1095,0.10978,0.13687,0.14059,0.13274,0.13662,0.1082,0.10768,0.11005,0.1085

9, 0.10927, 0.1072, 0.10898, 0.10935, 0.1073, 0.10806, 0.1082, 0.10733, 0.1083, 0.10822, 0.10755, 0.10753, 0.10962, 0.1099, 0.10589, 0.10786, 0.10769, 0.10745, 0.1085, 0.10819, 0.10685, 0.10751, 0.10747, 0.10771, 0.10823, 0.10788, 0.10937, 0.10885, 0.10841, 0.10761, 0.10767, 0.10747, 0.10958, 0.10941, 0.10847, 0.10952, 0.10754, 0.10847, 0.10854, 0.10805, 0.10849, 0.10835, 0.10845, 0.10769, 0.10819, 0.10941, 0.10916, 0.10828, 0.10782, 0.10874, 0.10763, 0.10818, 0.10891, 0.10796, 0.10737, 0.10652, 0.1094, 0.10594, 0.10745, 0.10706, 0.10804, 0.10751, 0.10838, 0.10748, 0.10691, 0.10813, 0.10839, 0.1073, 0.10862, 0.10883, 0.10806, 0.10813, 0.10933, 0.10962, 0.10971, 0.10853, 0.11034, 0.10852, 0.10737, 0.10969, 0.10882, 0.10909, 0.10783, 0.10881, 0.10701, 0.10761, 0.10855, 0.10828, 0.10761, 0.10756, 0.10866, 0.11002, 0.10863, 0.10777, 0.10764, 0.10764, 0.10754, 0.109, 0.10887, 0.10881, 0.10902, 0.10769, 0.1085, 0.10813, 0.10847, 0.10807, 0.10752, 0.10705, 0.10738, 0.10874, 0.10881, 0.10808, 0.10626, 0.10745, 0.10804, 0.10919, 0.10842, 0.10777, 0.10941, 0.11079, 0.10894, 0.11011, 0.10873, 0.10848, 0.10771, 0.10765, 0.10858, 0.10822, 0.10779, 0.10872, 0.10783, 0.10926, 0.1075, 0.1084, 0.10943, 0.10943, 0.10766, 0.10926, 0.10732, 0.10707, 0.10882, 0.10851, 0.10849, 0.10773, 0.10822, 0.108, 0.10751, 0.10847, 0.10822, 0.10829, 0.10805, 0.10801, 0.10815, 0.10979, 0.10917, 0.10828, 0.10792, 0.10789, 0.10859, 0.1074, 0.10838, 0.10957, 0.10856, 0.10825, 0.10858, 0.10749, 0.10875, 0.108, 0.10774, 0.10865, 0.10802, 0.10717, 0.10802, 0.10618, 0.10805, 0.10767, 0.10856, 0.10945, 0.10886, 0.10723, 0.10892, 0.10754, 0.10755, 0.10744, 0.1076, 0.10862, 0.1083, 0.10886, 0.10896, 0.10706, 0.10824  
0.18157, 0.18285, 0.18534, 0.17937, 0.18115, 0.17988, 0.18297, 0.17983, 0.18162, 0.18014, 0.18086, 0.17982, 0.18148, 0.17902, 0.18227, 0.18158, 0.18222, 0.18384, 0.18504, 0.18042, 0.36604, 0.37109, 0.35658, 0.37823, 0.18164, 0.18185, 0.17799, 0.18126, 0.18428, 0.17976, 0.18305, 0.18289, 0.18052, 0.1807, 0.18099, 0.18189, 0.1849, 0.17945, 0.18184, 0.55343, 0.35046, 0.3536, 0.36322, 0.34408, 0.3546, 0.42096, 0.18129, 0.18145, 0.17791, 0.18177, 0.18213, 0.18213, 0.17935, 0.18128, 0.17895, 0.18161, 0.18132, 0.18159, 0.18078, 0.18547, 0.17891, 0.5376, 0.56021, 0.39397, 0.37719, 0.35344, 0.37898, 0.34828, 0.34941, 0.35009, 0.38936, 0.18073, 0.18405, 0.18072, 0.18173, 0.18212, 0.18144, 0.18208, 0.18315, 0.17998, 0.17989, 0.17918, 0.17948, 0.18079, 0.17993, 0.17799, 0.56301, 0.52333, 0.51715, 0.37108, 0.36081, 0.3115, 0.37252, 0.37395, 0.3864, 0.35719, 0.35951, 0.37562, 0.18075, 0.18252, 0.18124, 0.18209, 0.18051, 0.18342, 0.17996, 0.18302, 0.18165, 0.1797, 0.17773, 0.17783, 0.18363, 0.18003, 0.17944, 0.18109, 0.54858, 0.51896, 0.55223, 0.57383, 0.33036, 0.34559, 0.37276, 0.3579, 0.37302, 0.36927, 0.35217, 0.37648, 0.39158, 0.34775, 0.18159, 0.18292, 0.17844, 0.18121, 0.18574, 0.18058, 0.18374, 0.17956, 0.18174, 0.18287, 0.18515, 0.18417, 0.17896, 0.1807, 0.18197, 0.18061, 0.53371, 0.53623, 0.53025, 0.52957, 0.56326, 0.57206, 0.37047, 0.39201, 0.36956, 0.34908, 0.33818, 0.35834, 0.36313, 0.37032, 0.34927, 0.36033, 0.17941, 0.18299, 0.18096, 0.18121, 0.1813, 0.18261, 0.17601, 0.18304, 0.17973, 0.18325, 0.18359, 0.18263, 0.18656, 0.18235, 0.18125, 0.18212, 0.1801, 0.53208, 0.52658, 0.54408, 0.52672, 0.53946, 0.52048, 0.38837, 0.45901, 0.35685, 0.32718, 0.33611, 0.37693, 0.34583, 0.3686, 0.36864, 0.38122, 0.40953, 0.18098, 0.18063, 0.18265, 0.18275, 0.1835, 0.18343, 0.17934, 0.18234, 0.18261, 0.17849, 0.17839, 0.17936, 0.18029, 0.14074, 0.14443, 0.14638, 0.18211, 0.51572, 0.51221, 0.52893, 0.52676, 0.54378, 0.55489, 0.5447, 0.36402, 0.37136, 0.36439, 0.38645, 0.37136, 0.34901, 0.36105, 0.34859, 0.37863, 0.34588, 0.32811, 0.18373, 0.18018, 0.1813, 0.1803, 0.17642, 0.18158, 0.18204, 0.181, 0.17993, 0.18302, 0.18068, 0.13543, 0.14425, 0.13983, 0.13149, 0.13509, 0.13953, 0.18166, 0.52585, 0.58223, 0.54531, 0.52026, 0.54047, 0.54686, 0.55518, 0.36749, 0.34572, 0.3759, 0.29439, 0.36152, 0.3683, 0.35001, 0.38501, 0.34124, 0.36022, 0.35124, 0

.17958,0.17898,0.17775,0.1831,0.18017,0.1828,0.18297,0.18312,0.18113,0.13622,0.13774,0.13829,0.13931,0.13929,0.13237,0.14147,0.14147,0.14043,0.18228,0.54753,0.53278,0.52101,0.5423,0.50932,0.54855,0.53005,0.35666,0.36951,0.36746,0.34327,0.35497,0.36041,0.33137,0.41041,0.34929,0.36125,0.35817,0.36692,0.18432,0.18316,0.17857,0.17868,0.18172,0.1785,0.13724,0.13859,0.14198,0.14549,0.14754,0.14333,0.14014,0.14563,0.14203,0.15166,0.13893,0.14016,0.56187,0.54841,0.53101,0.55575,0.57098,0.54949,0.5274,0.36692,0.35466,0.35981,0.35092,0.36628,0.38328,0.33919,0.35633,0.32264,0.38099,0.33967,0.38738,0.18106,0.18201,0.18226,0.1416,0.14222,0.14166,0.13994,0.14379,0.14051,0.15295,0.14168,0.14852,0.13753,0.13972,0.14517,0.1419,0.14051,0.14981,0.5297,0.52343,0.5713,0.52224,0.54628,0.55529,0.56063,0.54892,0.53825,0.38231,0.36296,0.36517,0.37119,0.36167,0.3483,0.35003,0.36575,0.36667,0.35007,0.32392,0.1445,0.1452,0.14118,0.14287,0.1358,0.14375,0.14026,0.13745,0.14131,0.14364,0.14033,0.13725,0.15664,0.14046,0.14383,0.13683,0.14216,0.13935,0.54246,0.53943,0.55973,0.56224,0.55982,0.53643,0.55613,0.53683,0.55163,0.35737,0.35804,0.22482,0.26493,0.30323,0.25623,0.28164,0.2821,0.27276,0.28735,0.27437,0.13796,0.14782,0.13164,0.13948,0.14012,0.13994,0.12728,0.13985,0.14113,0.14318,0.14169,0.142,0.13799,0.14062,0.141,0.13741,0.15122,0.14361,0.55031,0.5348,0.53999,0.54939,0.55968,0.52547,0.5269,0.5459,0.51899,0.33195,0.2895,0.2611,0.31071,0.27189,0.2769,0.25265,0.28857,0.26477,0.28876,0.27748,0.14567,0.13859,0.14086,0.13998,0.14288,0.1446,0.14989,0.14137,0.14061,0.13407,0.13893,0.14249,0.13779,0.14205,0.14151,0.14099,0.13803,0.14196,0.53458,0.56339,0.54262,0.58959,0.56758,0.56841,0.54369,0.32465,0.29086,0.324,0.30131,0.27497,0.27184,0.26894,0.28223,0.27485,0.28279,0.27533,0.23016,0.27584,0.13676,0.14257,0.14279,0.14283,0.14513,0.14136,0.119,0.14153,0.14917,0.14041,0.14139,0.1351,0.14125,0.13827,0.14425,0.14092,0.13907,0.13664,0.54986,0.55103,0.56436,0.51933,0.53209,0.53036,0.30066,0.35581,0.33342,0.30494,0.31131,0.27687,0.28507,0.27675,0.27385,0.27971,0.23411,0.28361,0.28248,0.27766,0.15111,0.1408,0.13974,0.13601,0.13533,0.14539,0.14353,0.13715,0.14096,0.14032,0.14107,0.14007,0.14105,0.14267,0.14072,0.143,0.15234,0.14678,0.52203,0.55509,0.52831,0.54864,0.56412,0.27774,0.29922,0.29933,0.33619,0.32812,0.30648,0.28025,0.25489,0.28955,0.2753,0.253,0.25798,0.27538,0.27875,0.27506,0.1425,0.14128,0.13833,0.13724,0.14167,0.1419,0.14674,0.13398,0.14763,0.14282,0.13959,0.141,0.13923,0.14414,0.14156,0.14019,0.14395,0.14258,0.54298,0.54382,0.51678,0.37954,0.3227,0.39041,0.35099,0.31812,0.32903,0.29738,0.31979,0.28929,0.28525,0.27421,0.28565,0.27784,0.30417,0.29434,0.27837,0.31776,0.14299,0.14012,0.14291,0.14163,0.14015,0.14851,0.14227,0.13872,0.14468,0.13349,0.14909,0.14182,0.14489,0.13531,0.14924,0.14491,0.14078,0.13977,0.55487,0.31007,0.29844,0.30956,0.34478,0.35817,0.31136,0.28591,0.33687,0.35926,0.27776,0.28118,0.28837,0.27376,0.30987,0.25229,0.24761,0.28176,0.27101,0.14026,0.13989,0.13491,0.14437,0.14108,0.14001,0.14303,0.14121,0.13601,0.1415,0.13779,0.14197,0.14416,0.14249,0.14083,0.13628,0.14608,0.10069,0.32156,0.32794,0.27903,0.32576,0.33592,0.36166,0.30249,0.34267,0.3291,0.29095,0.27331,0.27817,0.26215,0.27046,0.24047,0.26775,0.3104,0.27161,0.28121,0.13515,0.14077,0.14138,0.13669,0.14116,0.14231,0.13874,0.14345,0.14078,0.14117,0.14177,0.13194,0.13853,0.14032,0.13633,0.13619,0.14112,0.1014,0.32713,0.31827,0.30147,0.22201,0.32743,0.3208,0.32258,0.34714,0.34383,0.32778,0.28766,0.28647,0.25379,0.28162,0.25474,0.28208,0.26958,0.27849,0.14084,0.14083,0.13716,0.13996,0.14088,0.14195,0.13904,0.14667,0.13714,0.13329

,0.12654,0.13922,0.1369,0.14123,0.13457,0.13356,0.13829,0.14291,0.10093,0.34248,0.32213,0.30362,0.30893,0.32321,0.33548,0.30882,0.32713,0.27594,0.33075,0.2997,0.2713,0.25873,0.25737,0.30466,0.28223,0.2389,0.30635,0.1428,0.1411,0.14211,0.13981,0.14479,0.14415,0.14548,0.138,0.14137,0.14704,0.12889,0.14208,0.1303,0.14509,0.14293,0.13501,0.14148,0.10081,0.10096,0.10024,0.30551,0.36377,0.30316,0.33266,0.2796,0.30958,0.2687,0.28471,0.33365,0.30585,0.253,0.31497,0.30422,0.28241,0.26443,0.14616,0.14137,0.14264,0.13951,0.13266,0.14646,0.13999,0.14407,0.13924,0.14538,0.13875,0.13838,0.14165,0.14902,0.14704,0.1414,0.14444,0.14011,0.099859,0.09976,0.10006,0.10175,0.33466,0.34499,0.31859,0.17056,0.33465,0.33009,0.25157,0.36504,0.30652,0.26684,0.27484,0.27301,0.14744,0.13378,0.13911,0.14066,0.14049,0.14804,0.13896,0.13787,0.14104,0.13956,0.15005,0.14602,0.1404,0.14168,0.13246,0.14242,0.14149,0.14294,0.14638,0.14233,0.098977,0.098783,0.099696,0.10028,0.1008,0.10062,0.32718,0.33625,0.29304,0.26045,0.32947,0.37247,0.31874,0.27987,0.14488,0.12997,0.14462,0.14255,0.14008,0.15209,0.14056,0.1359,0.14314,0.1425,0.13867,0.1415,0.14044,0.13622,0.14155,0.14326,0.13653,0.14211,0.1574,0.14148,0.14289,0.13996,0.14533,0.10016,0.10043,0.1001,0.10102,0.099236,0.099203,0.33646,0.3463,0.23415,0.30057,0.33743,0.10183,0.10076,0.14235,0.13642,0.15126,0.14037,0.14318,0.14238,0.14115,0.14534,0.14322,0.1404,0.13872,0.14346,0.13241,0.13322,0.14203,0.15172,0.1478,0.14725,0.14035,0.14526,0.13757,0.10144,0.099427,0.10155,0.10154,0.10058,0.10188,0.099518,0.10099,0.10193,0.10095,0.31887,0.33394,0.10011,0.10104,0.10047,0.10079,0.1381,0.14123,0.14548,0.15308,0.13911,0.13835,0.14519,0.1432,0.13394,0.14065,0.12898,0.14621,0.14285,0.1407,0.15264,0.13878,0.14273,0.13949,0.14204,0.10062,0.10189,0.10094,0.10014,0.10117,0.10056,0.10103,0.099557,0.10104,0.10317,0.10002,0.10091,0.10006,0.10258,0.099791,0.10025,0.098355,0.14463,0.13995,0.14153,0.14713,0.13527,0.14046,0.15586,0.13974,0.14201,0.13668,0.14314,0.14151,0.13771,0.14344,0.13923,0.14077,0.10023,0.10106,0.1004,0.099396,0.10029,0.10072,0.1019,0.10226,0.10232,0.10065,0.1009,0.099684,0.10226,0.10071,0.10103,0.099965,0.099992,0.10178,0.10037,0.13086,0.14079,0.14233,0.14324,0.14067,0.14075,0.14493,0.14076,0.141,0.13827,0.13974,0.13764,0.14263,0.099307,0.10001,0.10136,0.10007,0.10126,0.10045,0.10026,0.099602,0.10185,0.10052,0.098928,0.099672,0.099998,0.10186,0.099255,0.1013,0.10157,0.10036,0.10063,0.099867,0.10013,0.14534,0.13798,0.14006,0.14009,0.13544,0.14671,0.14982,0.14578,0.14144,0.10068,0.10095,0.10001,0.10127,0.099622,0.10065,0.10145,0.10034,0.10009,0.099773,0.10086,0.10103,0.10159,0.10147,0.10181,0.10143,0.10068,0.10072,0.10145,0.099258,0.10228,0.10137,0.098879,0.10123,0.10174,0.13644,0.14046,0.13033,0.13605,0.10052,0.10022,0.103,0.10084,0.10185,0.10047,0.10073,0.10094,0.10013,0.10044,0.10037,0.099345,0.099999,0.10019,0.099927,0.099776,0.1022,0.10255,0.098167,0.099843,0.099682,0.099826,0.1005,0.10008,0.09943,0.10027,0.099947,0.1004,0.10051,0.10037,0.10143,0.10108,0.101,0.10045,0.099778,0.099934,0.10151,0.10119,0.10138,0.10143,0.10014,0.10056,0.10074,0.10044,0.10156,0.10109,0.10036,0.099634,0.10103,0.10152,0.10121,0.10019,0.10008,0.1005,0.099734,0.10077,0.10085,0.10041,0.099967,0.099236,0.10087,0.098684,0.10043,0.099269,0.10017,0.10031,0.10058,0.099761,0.098848,0.10092,0.10072,0.098826,0.10039,0.10127,0.099693,0.1007,0.10175,0.10221,0.10133,0.10038,0.10237,0.1004,0.10032,0.10187,0.10095,0.10107,0.10069,0.10135,0.09943,0.09956,0.10097,0.10034,0.099446,0.10012,0.10144,0.10212,0.10051,0.10007,0.10008,0.099782,0.10023,0.10125,0.10076,0.10068,0.10118,0.10033,0.10102,0.10057,0

.10046,0.10112,0.10014,0.099339,0.10036,0.10097,0.10137,0.09982,0.0984  
62,0.10047,0.10042,0.10141,0.10074,0.10015,0.1013,0.10325,0.10134,0.10  
21,0.10129,0.10067,0.1005,0.1001,0.099985,0.10061,0.099486,0.10118,0.1  
0075,0.10089,0.099295,0.099994,0.10213,0.1012,0.10023,0.10172,0.099594  
,0.099419,0.10117,0.10083,0.1006,0.099894,0.10105,0.10022,0.10079,0.10  
079,0.10091,0.10086,0.10028,0.10069,0.10013,0.10127,0.10132,0.10073,0.  
099992,0.10025,0.10096,0.099793,0.10115,0.10124,0.10096,0.10107,0.1004  
4,0.10057,0.10195,0.10014,0.10014,0.10168,0.10014,0.099545,0.10042,0.0  
98753,0.10097,0.099817,0.10064,0.10152,0.10112,0.099819,0.10138,0.1001  
9,0.099849,0.10055,0.10061,0.10113,0.10116,0.10149,0.10139,0.10018,0.1  
0058  
0.18648,0.18634,0.19143,0.18405,0.1872,0.18575,0.18855,0.18561,0.18743  
,0.18598,0.18702,0.18682,0.18844,0.18505,0.18785,0.18672,0.1879,0.1876  
5,0.19033,0.18599,0.3341,0.33684,0.32056,0.34101,0.18642,0.18817,0.184  
44,0.18598,0.18873,0.1856,0.18778,0.18854,0.18601,0.18578,0.18588,0.18  
831,0.19061,0.18382,0.18683,0.48153,0.31769,0.32435,0.32516,0.31879,0.  
3234,0.38009,0.18748,0.18687,0.18352,0.18829,0.18856,0.18848,0.18606,0  
.18577,0.18502,0.18667,0.18704,0.18696,0.186,0.19057,0.18441,0.46586,0  
.49271,0.35567,0.34586,0.32588,0.34079,0.31247,0.32034,0.32307,0.34935  
,0.18513,0.18981,0.18722,0.18734,0.18839,0.18762,0.18691,0.18931,0.185  
83,0.18387,0.18517,0.18718,0.18466,0.18516,0.18288,0.50104,0.45414,0.4  
7015,0.33815,0.32656,0.288,0.33733,0.34294,0.34705,0.32915,0.32461,0.3  
4107,0.18608,0.18818,0.18803,0.18734,0.18551,0.18834,0.18565,0.18808,0  
.18742,0.18534,0.1842,0.18258,0.18782,0.18558,0.18374,0.18701,0.48129,  
0.45177,0.46817,0.50261,0.30114,0.31836,0.34605,0.323,0.3481,0.33695,0  
.31721,0.33662,0.36167,0.31683,0.187,0.18745,0.18501,0.18672,0.19084,0  
.18572,0.18927,0.18682,0.18733,0.18875,0.18964,0.19049,0.18494,0.18552  
,0.18783,0.18838,0.46728,0.46382,0.46019,0.44477,0.498,0.52513,0.33632  
,0.34982,0.34586,0.31336,0.31223,0.33319,0.33023,0.34002,0.31233,0.335  
29,0.18794,0.18835,0.18725,0.18765,0.18694,0.18811,0.18202,0.18807,0.1  
852,0.18861,0.18855,0.18902,0.1926,0.1882,0.18575,0.18813,0.1855,0.467  
97,0.45147,0.47879,0.45653,0.47243,0.45018,0.35323,0.41185,0.3319,0.31  
021,0.30656,0.33988,0.3138,0.33761,0.33723,0.34926,0.37727,0.18563,0.1  
8583,0.18825,0.18816,0.18964,0.18799,0.18307,0.18822,0.18919,0.18568,0  
.18416,0.18401,0.18648,0.14009,0.143,0.14511,0.18695,0.46064,0.44689,0  
.46431,0.47276,0.47806,0.49589,0.46295,0.33605,0.3379,0.33797,0.35744,  
0.33791,0.31976,0.33528,0.32328,0.34521,0.3175,0.30144,0.19055,0.18527  
,0.18689,0.18484,0.18262,0.18636,0.18824,0.18553,0.18688,0.18824,0.184  
86,0.13415,0.14335,0.13799,0.12873,0.13314,0.13801,0.18714,0.45838,0.5  
1271,0.48301,0.46431,0.46016,0.47468,0.49498,0.33425,0.32399,0.34377,0  
.2796,0.33493,0.33755,0.32553,0.35464,0.31448,0.32909,0.32049,0.18509,  
0.18351,0.18352,0.1891,0.18647,0.18662,0.18922,0.1889,0.18615,0.13469,  
0.13605,0.13646,0.13825,0.1376,0.12935,0.14048,0.14102,0.13864,0.18811  
,0.48359,0.47167,0.47522,0.48915,0.45348,0.48859,0.45408,0.32978,0.334  
86,0.33191,0.31651,0.3281,0.32962,0.30662,0.36936,0.32141,0.32853,0.32  
605,0.33889,0.18892,0.18768,0.18425,0.18455,0.18784,0.1857,0.13535,0.1  
3752,0.14128,0.14514,0.14748,0.14222,0.13911,0.14473,0.14107,0.15311,0  
.13852,0.13915,0.49793,0.4923,0.46863,0.4863,0.49952,0.49744,0.45638,0  
.33784,0.32365,0.33509,0.32478,0.3383,0.34628,0.31483,0.32792,0.30207,  
0.3434,0.31263,0.35759,0.18548,0.18749,0.18762,0.14045,0.14142,0.14056  
,0.13872,0.14285,0.13956,0.1535,0.14109,0.14942,0.13577,0.13805,0.1437  
8,0.14068,0.13873,0.1506,0.45664,0.45432,0.50188,0.45948,0.47712,0.496

17,0.48751,0.49525,0.47788,0.34737,0.32879,0.33409,0.32997,0.33173,0.3  
2051,0.3198,0.33003,0.33396,0.31907,0.2967,0.14294,0.1449,0.13962,0.14  
236,0.13313,0.14267,0.1394,0.13579,0.14114,0.14373,0.13892,0.13476,0.1  
5648,0.13853,0.14415,0.13488,0.14015,0.13833,0.48281,0.49421,0.48709,0  
.50044,0.49,0.48009,0.4836,0.46385,0.49171,0.32428,0.32552,0.21148,0.2  
4761,0.27628,0.23799,0.25995,0.25965,0.24933,0.26304,0.24826,0.13503,0  
.14697,0.12915,0.1377,0.13838,0.13912,0.12403,0.13828,0.14022,0.14207,  
0.14089,0.14135,0.13588,0.13972,0.13967,0.13508,0.1521,0.14302,0.48641  
,0.47383,0.47194,0.49144,0.48122,0.46354,0.45621,0.48604,0.43424,0.296  
93,0.26206,0.2398,0.28142,0.2502,0.25119,0.23103,0.26113,0.24251,0.261  
69,0.25297,0.14607,0.13668,0.13985,0.13787,0.14161,0.14459,0.1496,0.14  
113,0.13823,0.13157,0.13775,0.14236,0.13581,0.14021,0.14056,0.13894,0.  
13643,0.141,0.47447,0.49758,0.47714,0.52142,0.49516,0.48677,0.47183,0.  
28566,0.25656,0.2917,0.26499,0.24944,0.24989,0.24626,0.25293,0.25308,0  
.25969,0.24788,0.21333,0.24622,0.13415,0.14181,0.14007,0.14159,0.14462  
,0.14008,0.11412,0.14004,0.14895,0.13949,0.14005,0.13354,0.13995,0.136  
69,0.14367,0.13949,0.13731,0.13567,0.48939,0.48772,0.49128,0.46722,0.4  
5633,0.46288,0.26542,0.30924,0.29618,0.27096,0.27472,0.25306,0.25761,0  
.25127,0.25096,0.2611,0.21892,0.26392,0.25605,0.25769,0.15099,0.13919,  
0.13877,0.13426,0.13359,0.14434,0.14298,0.13544,0.13949,0.13826,0.1403  
8,0.13935,0.13965,0.14105,0.13842,0.1416,0.15339,0.14728,0.4473,0.4873  
9,0.47371,0.48225,0.48163,0.24759,0.26819,0.27042,0.30102,0.28807,0.27  
645,0.25575,0.23721,0.26469,0.25019,0.23511,0.24035,0.25184,0.25645,0.  
25252,0.14117,0.14022,0.13614,0.1351,0.14036,0.14018,0.1466,0.13111,0.  
14759,0.14163,0.13841,0.14033,0.13721,0.1417,0.14027,0.13852,0.14245,0  
.1424,0.46629,0.4806,0.46072,0.33132,0.28447,0.34382,0.3096,0.28536,0.  
2951,0.262,0.28088,0.26338,0.26078,0.25438,0.25794,0.24934,0.27691,0.2  
7143,0.25622,0.29447,0.14338,0.13884,0.14314,0.1401,0.13892,0.14687,0.  
14156,0.13811,0.14491,0.1306,0.14909,0.14088,0.14327,0.13275,0.14966,0  
.14423,0.13952,0.13901,0.48878,0.2762,0.26704,0.27181,0.30143,0.31691,  
0.27595,0.25015,0.30094,0.31876,0.25304,0.25811,0.25868,0.24752,0.2821  
5,0.23241,0.22444,0.25668,0.24643,0.13942,0.13819,0.13356,0.14302,0.13  
969,0.13852,0.1421,0.13973,0.13358,0.1413,0.1362,0.14001,0.14239,0.141  
93,0.13945,0.13425,0.14539,0.092504,0.28817,0.28628,0.24911,0.28807,0.  
29814,0.3136,0.26328,0.30469,0.28373,0.25958,0.24966,0.25423,0.24488,0  
.24781,0.22401,0.24632,0.2797,0.24658,0.25701,0.13346,0.13959,0.1403,0  
.13445,0.13946,0.14071,0.13721,0.14229,0.13874,0.13947,0.14038,0.12941  
,0.13721,0.14009,0.13477,0.13461,0.14013,0.093223,0.2906,0.28971,0.266  
97,0.19699,0.28961,0.2799,0.27515,0.30811,0.30156,0.29126,0.26605,0.25  
901,0.23451,0.25526,0.23707,0.26451,0.24645,0.25518,0.13934,0.13953,0.  
13587,0.13822,0.14037,0.14111,0.13675,0.14649,0.13521,0.13035,0.12232,  
0.13842,0.13478,0.14066,0.13264,0.13112,0.1364,0.1425,0.092529,0.30212  
,0.28565,0.26512,0.26756,0.28889,0.2985,0.27475,0.29051,0.24454,0.2867  
7,0.27262,0.24695,0.23352,0.23525,0.27741,0.25676,0.22098,0.28235,0.14  
221,0.14078,0.14117,0.13816,0.14356,0.14298,0.14484,0.13689,0.13992,0.  
14639,0.12543,0.14135,0.12712,0.14415,0.1415,0.13249,0.14096,0.091838,  
0.09397,0.092447,0.26558,0.31979,0.26875,0.29415,0.25051,0.27476,0.240  
01,0.25074,0.28548,0.27988,0.23455,0.2797,0.2762,0.25738,0.2427,0.1460  
3,0.13975,0.14161,0.1392,0.12997,0.14532,0.13858,0.14341,0.13727,0.144  
51,0.13754,0.13768,0.13974,0.14896,0.14657,0.13938,0.14379,0.13918,0.0  
91844,0.091407,0.091889,0.093286,0.2929,0.29939,0.28448,0.15417,0.2957  
2,0.29582,0.22159,0.31736,0.26513,0.24597,0.24965,0.24839,0.14638,0.13

181,0.13684,0.13928,0.13887,0.14837,0.13769,0.13611,0.14022,0.13805,0.15101,0.14438,0.13876,0.14074,0.13015,0.14141,0.14048,0.14247,0.1462,0.14147,0.091185,0.090915,0.092041,0.091666,0.092796,0.091996,0.29262,0.28971,0.25727,0.23271,0.29194,0.32647,0.28053,0.24455,0.14469,0.12704,0.14449,0.14237,0.13891,0.15308,0.13885,0.13413,0.14159,0.14077,0.13742,0.1397,0.13944,0.13391,0.14003,0.1423,0.13531,0.14004,0.15898,0.14053,0.14206,0.13951,0.14438,0.092561,0.092751,0.0915,0.092595,0.091224,0.091401,0.29958,0.30312,0.20616,0.27033,0.29673,0.09388,0.092958,0.14049,0.13381,0.15197,0.13883,0.14183,0.14121,0.13996,0.14447,0.14178,0.13993,0.13752,0.14217,0.1295,0.1316,0.14045,0.1528,0.14708,0.14693,0.1393,0.14504,0.13519,0.093457,0.091125,0.093342,0.093613,0.092255,0.093443,0.092089,0.092812,0.09392,0.093211,0.27696,0.30119,0.092449,0.092414,0.092603,0.092579,0.13689,0.14031,0.14461,0.15308,0.13755,0.13566,0.14482,0.14136,0.13176,0.13922,0.12581,0.14561,0.14251,0.14051,0.1527,0.13802,0.14089,0.13826,0.14087,0.09226,0.093854,0.093202,0.092983,0.093482,0.092823,0.093516,0.092048,0.092676,0.094873,0.092783,0.092752,0.092491,0.094095,0.092469,0.092431,0.090768,0.14306,0.13895,0.14013,0.14635,0.1334,0.13984,0.15647,0.13884,0.141,0.13421,0.14224,0.14025,0.13592,0.14307,0.13783,0.13923,0.092891,0.093188,0.092197,0.091011,0.091602,0.092507,0.093923,0.09462,0.094094,0.092248,0.09319,0.091624,0.094425,0.092994,0.092942,0.091463,0.091688,0.093781,0.093219,0.12768,0.13933,0.14068,0.14217,0.13943,0.13907,0.14315,0.13922,0.13962,0.13573,0.13941,0.13628,0.14148,0.091007,0.091944,0.093851,0.091345,0.093012,0.092658,0.093399,0.092241,0.093897,0.092308,0.091707,0.092083,0.092384,0.093269,0.090968,0.092878,0.093584,0.092625,0.092822,0.092273,0.091934,0.14501,0.13596,0.1389,0.13846,0.13252,0.14635,0.15051,0.14518,0.13961,0.09285,0.092662,0.092408,0.092927,0.092057,0.093525,0.093435,0.092273,0.092248,0.091753,0.092648,0.092688,0.093346,0.093008,0.093421,0.093251,0.092708,0.092417,0.093426,0.091961,0.094546,0.093878,0.091576,0.093026,0.093482,0.13481,0.1395,0.12752,0.13376,0.092918,0.092201,0.09527,0.092699,0.094132,0.092854,0.092464,0.093601,0.092397,0.092741,0.092466,0.091499,0.091939,0.092244,0.092198,0.091403,0.093223,0.093971,0.090135,0.091891,0.092315,0.092016,0.09284,0.092675,0.091526,0.092388,0.093072,0.092833,0.092356,0.092699,0.09347,0.092891,0.092635,0.092998,0.0924,0.091723,0.093985,0.093203,0.092813,0.094037,0.092263,0.092545,0.092591,0.092251,0.093805,0.09333,0.092626,0.091124,0.092775,0.093458,0.093313,0.092419,0.092228,0.092772,0.092575,0.092787,0.093484,0.092175,0.091817,0.092217,0.092703,0.09121,0.092166,0.091304,0.09309,0.09245,0.093025,0.092703,0.090319,0.093174,0.093517,0.091046,0.092068,0.093053,0.092479,0.093073,0.094355,0.094552,0.093432,0.093097,0.093657,0.092483,0.091687,0.093872,0.09362,0.09361,0.092097,0.092804,0.091624,0.091314,0.09332,0.092559,0.091847,0.092693,0.093225,0.094159,0.092542,0.092535,0.091603,0.09191,0.092973,0.093647,0.093325,0.0929,0.093194,0.092792,0.093429,0.092968,0.092879,0.094032,0.091716,0.091311,0.093719,0.092482,0.093656,0.091953,0.09129,0.092676,0.092389,0.093182,0.092761,0.091653,0.093308,0.094602,0.093095,0.093971,0.093265,0.092739,0.092047,0.092419,0.092768,0.092418,0.092032,0.093162,0.092518,0.092417,0.090848,0.091775,0.094357,0.093116,0.091932,0.093965,0.091807,0.091318,0.093832,0.092746,0.092135,0.09197,0.093014,0.09262,0.092804,0.092813,0.092343,0.093343,0.092561,0.092241,0.092339,0.093656,0.093208,0.091907,0.092563,0.09252,0.093116,0.091965,0.092355,0.09271,0.092756,0.092659,0.092789,0.093024,0.093349,0.091916,0.092351,0.093344,0.092705,0.091347



,0.093072,0.090711,0.092376,0.092487,0.092541,0.093464,0.093037,0.092377,0.09315,0.091288,0.092182,0.093057,0.092087,0.092382,0.093384,0.092946,0.093314,0.092033,0.092663  
0.19042,0.19175,0.19455,0.18782,0.19179,0.18983,0.19231,0.18847,0.19164,0.19049,0.19073,0.19043,0.19235,0.18958,0.19105,0.19119,0.19113,0.19081,0.19336,0.19013,0.32104,0.32416,0.30171,0.31958,0.18977,0.19215,0.18802,0.18883,0.19205,0.18963,0.19151,0.1925,0.19,0.1893,0.1909,0.19258,0.19434,0.18837,0.19056,0.44949,0.30446,0.30632,0.3112,0.30387,0.30589,0.35082,0.19118,0.19055,0.18771,0.19225,0.19144,0.19196,0.18865,0.18958,0.18894,0.19053,0.1915,0.1911,0.19051,0.19462,0.18903,0.42989,0.45845,0.33124,0.33221,0.30894,0.32077,0.29622,0.30432,0.30774,0.32268,0.19045,0.19361,0.19137,0.19095,0.19314,0.19131,0.19188,0.19294,0.19071,0.18753,0.18885,0.19233,0.18911,0.19135,0.18848,0.45574,0.41337,0.42681,0.33096,0.3076,0.274,0.31614,0.31981,0.32126,0.31367,0.30871,0.32151,0.18991,0.19373,0.19237,0.1914,0.19121,0.19158,0.18862,0.19192,0.19085,0.18782,0.18921,0.18777,0.19195,0.19017,0.18848,0.19121,0.44493,0.41002,0.43043,0.45776,0.28807,0.30323,0.3258,0.30756,0.32356,0.31822,0.3015,0.3181,0.33818,0.29924,0.19141,0.19065,0.1881,0.1913,0.19248,0.18939,0.19362,0.18986,0.19064,0.19378,0.19445,0.19349,0.18897,0.18926,0.19221,0.19232,0.42975,0.42091,0.428,0.41149,0.46587,0.47003,0.32104,0.32658,0.32991,0.29292,0.29505,0.31382,0.31006,0.31947,0.29538,0.3198,0.19094,0.19266,0.19111,0.19217,0.19153,0.19108,0.18718,0.19155,0.19,0.19235,0.19189,0.19263,0.19566,0.19119,0.1902,0.19185,0.1905,0.43445,0.42575,0.44332,0.42986,0.43118,0.40919,0.33786,0.37894,0.31144,0.30133,0.29188,0.32695,0.29391,0.32207,0.31898,0.33355,0.35973,0.18985,0.19163,0.19148,0.19279,0.19279,0.19198,0.18767,0.19258,0.19303,0.19038,0.18803,0.18752,0.19062,0.1381,0.14177,0.14376,0.19075,0.42884,0.40753,0.42557,0.44137,0.44548,0.46268,0.41891,0.32338,0.31391,0.32119,0.3338,0.32061,0.30708,0.31893,0.30275,0.32172,0.29884,0.28682,0.19408,0.18962,0.19145,0.18943,0.1877,0.18963,0.19099,0.18867,0.19062,0.1927,0.18984,0.1307,0.14256,0.13556,0.12584,0.13127,0.13664,0.18962,0.41623,0.46512,0.44343,0.43447,0.41352,0.42992,0.45668,0.30899,0.30569,0.31956,0.27149,0.31919,0.3179,0.30751,0.33385,0.29433,0.31637,0.30477,0.18949,0.18763,0.18934,0.19243,0.18927,0.18902,0.19322,0.19309,0.191,0.1323,0.13403,0.1343,0.13569,0.13431,0.12674,0.13922,0.13966,0.13612,0.19271,0.44588,0.42295,0.44215,0.45992,0.41272,0.42782,0.40683,0.30432,0.31576,0.30842,0.30042,0.31613,0.30862,0.28882,0.34716,0.30062,0.3102,0.31483,0.32476,0.19115,0.19119,0.18794,0.18868,0.1918,0.19018,0.13326,0.13621,0.13892,0.1433,0.1466,0.14053,0.13849,0.14374,0.13991,0.15317,0.13653,0.13697,0.44514,0.44792,0.41729,0.4384,0.46271,0.46255,0.42038,0.32089,0.30854,0.31312,0.31242,0.3273,0.32144,0.29588,0.31113,0.29073,0.32431,0.29838,0.33877,0.18909,0.19245,0.19041,0.13901,0.13952,0.13857,0.13637,0.14124,0.13767,0.15305,0.13946,0.14875,0.1337,0.13644,0.14344,0.13901,0.13642,0.14951,0.41424,0.426,0.45067,0.42315,0.45201,0.46621,0.44991,0.44957,0.43542,0.32744,0.31163,0.31731,0.30724,0.30865,0.30463,0.29929,0.30958,0.31432,0.30148,0.2852,0.14186,0.14379,0.13738,0.14218,0.1308,0.14154,0.13795,0.13265,0.13952,0.14321,0.13638,0.13178,0.15707,0.13688,0.1421,0.13347,0.13831,0.1367,0.44903,0.45173,0.44445,0.45286,0.44946,0.43771,0.44107,0.41426,0.45065,0.3072,0.30355,0.19966,0.23201,0.26224,0.22581,0.24837,0.24415,0.23406,0.25117,0.23115,0.13245,0.14581,0.12631,0.13516,0.13687,0.13876,0.12103,0.13611,0.13846,0.13958,0.14001,0.14105,0.13402,0.13779,0.13778,0.133,0.15224,0.14264,0.4357,0.4

2434,0.42347,0.4511,0.43635,0.41994,0.40944,0.44209,0.38657,0.26909,0.24493,0.23044,0.26198,0.23573,0.23851,0.21794,0.24715,0.23014,0.24631,0.23555,0.14501,0.13524,0.13777,0.13514,0.14079,0.14286,0.14957,0.14029,0.13628,0.12856,0.13638,0.14117,0.13418,0.13953,0.13945,0.13739,0.13399,0.13959,0.42949,0.45292,0.43015,0.47663,0.46548,0.46356,0.42458,0.26044,0.22904,0.27161,0.24669,0.234,0.23439,0.23524,0.234,0.23395,0.24191,0.23238,0.20228,0.23134,0.13197,0.13997,0.13805,0.1393,0.14306,0.13782,0.10916,0.13834,0.14841,0.1369,0.13759,0.13094,0.13671,0.13362,0.1424,0.13809,0.13651,0.1335,0.44819,0.45071,0.44174,0.43837,0.4193,0.4085,0.23567,0.27731,0.26871,0.2498,0.25032,0.23583,0.24466,0.236,0.2353,0.24612,0.20711,0.24827,0.24832,0.23835,0.1508,0.13706,0.13754,0.1326,0.13101,0.14277,0.14209,0.13331,0.13741,0.13694,0.13815,0.13832,0.13835,0.139,0.13692,0.14033,0.15356,0.14556,0.41879,0.44039,0.42385,0.44387,0.44652,0.22949,0.24549,0.25494,0.27117,0.26273,0.25579,0.23914,0.22568,0.24661,0.23692,0.22118,0.22782,0.23845,0.2442,0.24173,0.13922,0.13863,0.13493,0.13233,0.13858,0.13783,0.14539,0.1286,0.14655,0.14037,0.13739,0.13946,0.1348,0.13949,0.13916,0.1371,0.14078,0.14185,0.43318,0.44929,0.4085,0.30483,0.26201,0.30429,0.27916,0.25727,0.27121,0.23562,0.2586,0.24806,0.24582,0.23922,0.24334,0.23302,0.25671,0.2538,0.23811,0.27752,0.14217,0.13765,0.14208,0.13852,0.13678,0.14638,0.14026,0.1363,0.14455,0.128,0.14743,0.13898,0.14233,0.13004,0.14856,0.14308,0.13796,0.13708,0.44859,0.25579,0.24206,0.25151,0.27908,0.29236,0.24799,0.22378,0.27593,0.29479,0.23838,0.24542,0.24281,0.23227,0.26835,0.21828,0.21099,0.23826,0.23566,0.13853,0.13739,0.13076,0.14155,0.13913,0.1365,0.1411,0.13715,0.13107,0.14015,0.13427,0.13824,0.14078,0.141,0.13768,0.13171,0.14354,0.085138,0.2611,0.26338,0.23111,0.26437,0.26823,0.28195,0.24899,0.28084,0.26031,0.24019,0.23555,0.23816,0.22721,0.23582,0.21566,0.23842,0.26944,0.2326,0.23675,0.13002,0.13806,0.13771,0.13221,0.13804,0.13953,0.1355,0.13997,0.13715,0.13766,0.13856,0.12598,0.13588,0.13894,0.13216,0.13117,0.13821,0.086311,0.26753,0.25452,0.23995,0.17788,0.26332,0.26094,0.24659,0.27651,0.27404,0.26412,0.25121,0.24005,0.22185,0.24374,0.22343,0.24673,0.23017,0.24127,0.13753,0.13662,0.13424,0.1364,0.13842,0.14039,0.13549,0.14594,0.13314,0.12725,0.11905,0.13676,0.13305,0.13816,0.12899,0.12773,0.13505,0.14108,0.085534,0.28301,0.26148,0.23526,0.23772,0.2654,0.27811,0.2466,0.26338,0.21978,0.26356,0.25919,0.23224,0.22357,0.21936,0.26318,0.24357,0.20638,0.26318,0.14016,0.13949,0.14,0.13678,0.1421,0.14225,0.14347,0.13463,0.13789,0.14534,0.12273,0.13966,0.12383,0.14268,0.13916,0.1308,0.13959,0.084147,0.086725,0.084905,0.24179,0.29717,0.2509,0.26207,0.22625,0.25276,0.2168,0.22719,0.25898,0.26352,0.22017,0.2581,0.26076,0.24034,0.22704,0.14553,0.13745,0.14037,0.13749,0.12639,0.14435,0.13602,0.14264,0.13486,0.14261,0.13447,0.13591,0.13808,0.14775,0.14499,0.13845,0.14296,0.13696,0.084537,0.084087,0.084366,0.086399,0.26496,0.28014,0.25823,0.14122,0.27501,0.27203,0.20352,0.29088,0.23712,0.22742,0.23659,0.23292,0.14496,0.12918,0.1337,0.13718,0.1367,0.14911,0.13573,0.13381,0.13912,0.13667,0.1502,0.14382,0.13815,0.14001,0.12702,0.14029,0.1386,0.14034,0.14499,0.13968,0.08404,0.084233,0.08544,0.084538,0.085759,0.085128,0.26792,0.26797,0.23558,0.20865,0.28003,0.2949,0.26382,0.22644,0.14324,0.12467,0.14312,0.14107,0.13672,0.15384,0.13729,0.13201,0.14053,0.13918,0.13573,0.13739,0.13684,0.13201,0.13726,0.14017,0.13366,0.13856,0.15916,0.13865,0.14006,0.13766,0.14286,0.085091,0.085565,0.083988,0.085409,0.083874,0.084168,0.2753,0.28941,0.19281,0.25464,0.27318,0.086115,0.085637,0.13915,0.13202,0.

15163,0.13728,0.13929,0.13968,0.13942,0.14364,0.13955,0.13792,0.135,0.  
14091,0.12627,0.12907,0.13905,0.15198,0.14607,0.14562,0.13694,0.14372,  
0.13282,0.085612,0.084383,0.085967,0.086416,0.08467,0.08505,0.08482,0.  
084839,0.086961,0.086007,0.25353,0.27324,0.085031,0.084837,0.085405,0.  
085513,0.13507,0.13925,0.14308,0.15388,0.13529,0.13394,0.14437,0.13969  
,0.12877,0.13707,0.12296,0.14503,0.14079,0.13877,0.15249,0.13638,0.137  
96,0.13562,0.13889,0.085,0.085957,0.086096,0.085387,0.086857,0.085632,  
0.086694,0.084601,0.085453,0.087319,0.084874,0.084606,0.08538,0.086693  
,0.085239,0.084382,0.083648,0.14081,0.13731,0.13787,0.14661,0.13124,0.  
13841,0.15675,0.1367,0.1395,0.13108,0.1408,0.1382,0.13302,0.14134,0.13  
468,0.13712,0.085334,0.085296,0.084304,0.083514,0.084489,0.08422,0.086  
482,0.087145,0.086897,0.085072,0.085874,0.084257,0.086636,0.085816,0.0  
85642,0.083693,0.084553,0.086411,0.086105,0.12482,0.13859,0.1384,0.140  
9,0.13843,0.1378,0.14141,0.13687,0.13707,0.13252,0.13846,0.13397,0.139  
85,0.084285,0.083853,0.086491,0.083792,0.085337,0.084378,0.085943,0.08  
5124,0.086145,0.084306,0.085072,0.084382,0.084952,0.085049,0.083609,0.  
085218,0.08626,0.085382,0.085823,0.084961,0.084379,0.14343,0.13304,0.1  
3749,0.13616,0.13021,0.14496,0.15103,0.1447,0.13794,0.08512,0.085529,0  
.085133,0.085593,0.084489,0.086515,0.085844,0.085159,0.084522,0.084447  
,0.085319,0.085562,0.08554,0.08551,0.086102,0.085514,0.085715,0.084692  
,0.085976,0.084596,0.086802,0.086288,0.083568,0.08542,0.08593,0.13209,  
0.13738,0.1243,0.13119,0.085593,0.084863,0.086944,0.085904,0.086225,0.  
08567,0.085467,0.085858,0.084657,0.084559,0.085176,0.084156,0.084167,0  
.084868,0.085188,0.084362,0.085739,0.086053,0.083142,0.084108,0.084463  
,0.084979,0.085073,0.084978,0.084021,0.085973,0.084696,0.08567,0.08532  
1,0.085487,0.085753,0.085844,0.08505,0.085125,0.084944,0.084232,0.0862  
87,0.085643,0.085972,0.086362,0.084964,0.085145,0.084691,0.085149,0.08  
6555,0.085368,0.084779,0.08407,0.08552,0.086414,0.085617,0.084631,0.08  
4476,0.085688,0.084818,0.08531,0.085666,0.084762,0.084362,0.084592,0.0  
85893,0.084391,0.084342,0.084495,0.086174,0.085196,0.08555,0.085179,0.  
083139,0.086286,0.085941,0.083812,0.085464,0.085483,0.085368,0.085242,  
0.08632,0.087397,0.085966,0.085988,0.086159,0.084697,0.084448,0.08625,  
0.085273,0.086673,0.085477,0.085041,0.084264,0.083751,0.086113,0.08461  
4,0.084191,0.085383,0.085875,0.0854,0.084849,0.085323,0.083961,0.08438  
7,0.085677,0.085555,0.085825,0.085509,0.08561,0.084858,0.086579,0.0853  
46,0.085753,0.086287,0.084376,0.083457,0.086115,0.084868,0.086279,0.08  
4437,0.083895,0.085025,0.085033,0.086114,0.085504,0.084131,0.085843,0.  
086013,0.085176,0.087174,0.086214,0.085963,0.084956,0.084483,0.084951,  
0.084874,0.084629,0.085388,0.085185,0.084687,0.08371,0.083935,0.086866  
,0.086171,0.084908,0.086091,0.084238,0.084143,0.086871,0.084906,0.0851  
51,0.085124,0.085214,0.085571,0.085079,0.084851,0.085182,0.08602,0.084  
846,0.085221,0.084684,0.086748,0.085403,0.084952,0.085448,0.08465,0.08  
5255,0.084662,0.085148,0.085264,0.085395,0.085196,0.085444,0.08587,0.0  
85747,0.084134,0.084698,0.085627,0.085302,0.084445,0.084855,0.083784,0  
.084712,0.085369,0.084532,0.085921,0.085691,0.084726,0.085282,0.083426  
,0.0845,0.08571,0.084231,0.084913,0.08611,0.086117,0.086181,0.08484,0.  
084162  
0.19318,0.19424,0.19786,0.1912,0.19559,0.1937,0.19567,0.19165,0.19337,  
0.19296,0.19333,0.19342,0.19629,0.1919,0.19426,0.19325,0.19342,0.19515  
,0.19694,0.19301,0.30694,0.30915,0.29327,0.3092,0.19157,0.19629,0.1912  
5,0.1917,0.19522,0.1926,0.19367,0.19669,0.19351,0.19264,0.19364,0.1963  
5,0.19732,0.19281,0.19139,0.41913,0.29136,0.29518,0.29856,0.29408,0.29

46,0.33053,0.19399,0.19341,0.19011,0.19428,0.19444,0.19427,0.19141,0.19178,0.19279,0.19382,0.19362,0.19487,0.1932,0.19693,0.19283,0.39564,0.41973,0.3236,0.32093,0.2986,0.30555,0.27983,0.28358,0.30341,0.31311,0.19296,0.19588,0.19381,0.19394,0.19611,0.19273,0.19459,0.19603,0.19358,0.19216,0.19149,0.1954,0.19134,0.19398,0.19211,0.41034,0.39405,0.41088,0.31784,0.29903,0.2657,0.30816,0.30402,0.31118,0.29971,0.29826,0.30695,0.19244,0.19633,0.19545,0.19456,0.19242,0.19352,0.19113,0.19512,0.19302,0.1916,0.19186,0.19134,0.19642,0.19362,0.1931,0.19442,0.41328,0.37972,0.41814,0.4312,0.27722,0.29331,0.30992,0.3007,0.31122,0.31688,0.29008,0.30513,0.32744,0.28644,0.19373,0.19292,0.19061,0.19512,0.19458,0.19269,0.19759,0.19278,0.19335,0.19702,0.1985,0.19707,0.19185,0.19258,0.19568,0.19663,0.39479,0.40046,0.39587,0.38516,0.45669,0.44147,0.31008,0.31484,0.32425,0.28684,0.2898,0.30502,0.29602,0.30266,0.28047,0.30514,0.19485,0.19523,0.19276,0.19351,0.19535,0.19407,0.18829,0.19504,0.19264,0.19563,0.19547,0.19416,0.19802,0.19433,0.19199,0.19514,0.19284,0.40893,0.39883,0.42603,0.40239,0.39928,0.37862,0.32029,0.35239,0.29962,0.29499,0.28386,0.31927,0.28966,0.30702,0.30935,0.33042,0.34278,0.19319,0.19487,0.19433,0.19642,0.19576,0.19547,0.19042,0.19557,0.19484,0.19206,0.19176,0.19026,0.19282,0.13688,0.14085,0.14183,0.19392,0.40519,0.3768,0.40677,0.4138,0.41233,0.42929,0.3956,0.31604,0.30748,0.30658,0.3226,0.30818,0.2949,0.30044,0.28441,0.31515,0.28621,0.27715,0.19715,0.19417,0.19411,0.19245,0.19089,0.19088,0.19391,0.19175,0.19235,0.19527,0.19379,0.12797,0.14104,0.13442,0.123,0.12934,0.13559,0.19196,0.40249,0.4299,0.42966,0.4005,0.38521,0.40639,0.42788,0.30023,0.29372,0.30366,0.26068,0.305,0.30341,0.29068,0.32265,0.28551,0.31286,0.29092,0.19264,0.19127,0.19294,0.19587,0.19245,0.19234,0.19689,0.19609,0.19423,0.13019,0.13191,0.13271,0.13355,0.13241,0.12349,0.13693,0.13823,0.13349,0.19636,0.41867,0.38998,0.41448,0.44147,0.38142,0.3937,0.36576,0.29199,0.30536,0.29764,0.28902,0.30757,0.293,0.28102,0.33149,0.28215,0.29971,0.30339,0.31853,0.19276,0.19537,0.19268,0.19312,0.19463,0.193,0.13123,0.13358,0.13649,0.14169,0.14573,0.13742,0.13629,0.14345,0.13936,0.15258,0.1343,0.135,0.424,0.41488,0.38995,0.39193,0.42765,0.44526,0.39565,0.30828,0.29426,0.29764,0.29999,0.31144,0.3094,0.28966,0.29826,0.28204,0.30882,0.28622,0.32746,0.19319,0.19649,0.19389,0.13776,0.13616,0.13647,0.13515,0.13961,0.13549,0.15266,0.13811,0.14886,0.13224,0.13454,0.14227,0.13803,0.13403,0.14822,0.39346,0.39904,0.43129,0.38885,0.41806,0.44045,0.4238,0.43067,0.40693,0.31717,0.30569,0.3057,0.2963,0.29738,0.29447,0.2894,0.30175,0.30567,0.30583,0.28124,0.13998,0.14198,0.13588,0.1411,0.12901,0.13985,0.13724,0.13009,0.13841,0.14228,0.13462,0.12942,0.15677,0.13453,0.14095,0.13125,0.13696,0.13471,0.41533,0.42645,0.42068,0.41525,0.41981,0.41012,0.42522,0.39191,0.40268,0.30208,0.29282,0.19185,0.22443,0.25378,0.21565,0.24008,0.23402,0.22882,0.23335,0.2248,0.12997,0.14453,0.12382,0.13263,0.13613,0.13627,0.11834,0.13354,0.13674,0.13822,0.13866,0.13921,0.13201,0.13591,0.13563,0.12997,0.15108,0.14168,0.40177,0.38723,0.40266,0.41708,0.41607,0.38735,0.37774,0.40334,0.37152,0.25343,0.23476,0.22352,0.24801,0.23083,0.22694,0.21165,0.2337,0.22149,0.23244,0.22848,0.14304,0.13312,0.13612,0.13323,0.1386,0.14209,0.14848,0.13844,0.13414,0.12574,0.13471,0.13895,0.13163,0.13829,0.13754,0.1353,0.13149,0.13741,0.40124,0.42363,0.40484,0.4433,0.44173,0.43899,0.398,0.24599,0.21388,0.25947,0.23155,0.22906,0.22683,0.22577,0.22597,0.22577,0.23855,0.21725,0.19604,0.21728,0.12846,0.13833,0.13589,0.13796,0.14143,0.13573,0.10437,0.13708,0.14632,0.13601,0.13587,0.12863,0.1343,0.1

3206,0.14102,0.13633,0.13501,0.13092,0.41557,0.41948,0.41876,0.41769,0.3973,0.38252,0.21874,0.2554,0.25314,0.23399,0.23612,0.22477,0.23712,0.22124,0.22197,0.24015,0.19992,0.23542,0.23745,0.22914,0.15092,0.13513,0.13535,0.1303,0.12883,0.14109,0.14189,0.13192,0.1361,0.13459,0.13644,0.13677,0.13641,0.13686,0.13504,0.13819,0.15295,0.14513,0.40719,0.41319,0.39807,0.42057,0.42065,0.21316,0.23565,0.23571,0.24996,0.24649,0.23336,0.22695,0.2161,0.24098,0.22996,0.21099,0.21558,0.22806,0.23106,0.23007,0.13839,0.13693,0.13298,0.12975,0.13633,0.13592,0.14467,0.12752,0.14614,0.13818,0.13596,0.13726,0.13331,0.13754,0.13732,0.13561,0.13878,0.14014,0.41368,0.41267,0.39701,0.28433,0.24518,0.2875,0.26158,0.24229,0.2568,0.2213,0.23911,0.23511,0.23661,0.22939,0.23163,0.22437,0.247,0.24973,0.23225,0.26811,0.1414,0.13642,0.14106,0.13669,0.13408,0.14528,0.13819,0.134,0.14358,0.12549,0.14607,0.13754,0.14091,0.128,0.14735,0.14133,0.13615,0.1347,0.40837,0.23588,0.21807,0.23793,0.25508,0.27846,0.23712,0.21247,0.25546,0.2775,0.23126,0.23488,0.22898,0.22175,0.25665,0.20946,0.20329,0.23009,0.23174,0.13752,0.13605,0.12774,0.13989,0.13743,0.13493,0.13911,0.13512,0.12873,0.13922,0.13284,0.13601,0.13859,0.13931,0.13523,0.12897,0.14156,0.0779,0.24058,0.24667,0.22084,0.24603,0.25206,0.26844,0.23085,0.26352,0.24586,0.22863,0.22725,0.22709,0.22277,0.22728,0.20975,0.22605,0.25956,0.22399,0.22421,0.12776,0.13577,0.13613,0.13009,0.1363,0.13805,0.13335,0.1379,0.13536,0.13597,0.13587,0.12403,0.13421,0.13682,0.13056,0.12833,0.13624,0.079623,0.24036,0.23658,0.22881,0.16356,0.25032,0.23989,0.23694,0.26232,0.26141,0.24593,0.2411,0.22875,0.21477,0.23386,0.21547,0.23288,0.22003,0.23165,0.13518,0.13482,0.13215,0.13471,0.13693,0.1387,0.13328,0.14346,0.13202,0.12477,0.11536,0.13599,0.13044,0.13571,0.12619,0.12498,0.13294,0.13913,0.079015,0.26913,0.2463,0.22235,0.21871,0.2568,0.2606,0.22505,0.24437,0.20441,0.24484,0.25086,0.22391,0.21529,0.21128,0.25409,0.23327,0.19737,0.24845,0.13879,0.13754,0.13801,0.1346,0.1405,0.14097,0.14307,0.13276,0.13637,0.1435,0.11905,0.13799,0.12078,0.14147,0.13693,0.12834,0.13755,0.077914,0.080078,0.078684,0.22327,0.29013,0.23851,0.24486,0.21101,0.23519,0.20492,0.20519,0.24976,0.25749,0.21061,0.24048,0.24882,0.22937,0.21954,0.1446,0.13583,0.13781,0.13477,0.12315,0.14239,0.13413,0.14051,0.13243,0.14083,0.13306,0.13378,0.13608,0.1469,0.14275,0.13615,0.14138,0.13472,0.077773,0.078208,0.077356,0.079976,0.25062,0.26504,0.24492,0.13246,0.25721,0.25931,0.19523,0.27232,0.2205,0.21436,0.22455,0.22143,0.14391,0.12552,0.13116,0.13511,0.13525,0.14777,0.13339,0.13073,0.13667,0.13567,0.14916,0.14116,0.13644,0.13831,0.12357,0.1384,0.13702,0.13881,0.14423,0.13867,0.077587,0.077701,0.079293,0.078627,0.079315,0.07905,0.25364,0.24415,0.22427,0.196,0.26432,0.27197,0.24716,0.21206,0.14182,0.12258,0.14227,0.13949,0.13539,0.1537,0.13555,0.1298,0.13958,0.13759,0.1347,0.13572,0.13503,0.12969,0.13554,0.13908,0.13186,0.1373,0.15933,0.13651,0.13847,0.13612,0.14166,0.078325,0.078539,0.077807,0.078639,0.077488,0.078039,0.26126,0.27867,0.17782,0.23778,0.25518,0.079529,0.078509,0.13771,0.12961,0.1514,0.13499,0.13799,0.13757,0.13749,0.14161,0.13846,0.1358,0.13434,0.13874,0.12288,0.12589,0.13746,0.15202,0.14531,0.14444,0.1344,0.14188,0.12974,0.078556,0.077665,0.078865,0.080228,0.078563,0.077783,0.078691,0.078788,0.080479,0.078858,0.23417,0.26079,0.07904,0.078744,0.07841,0.078809,0.13313,0.13853,0.14145,0.15404,0.133,0.13215,0.1421,0.1389,0.12513,0.13585,0.11924,0.14367,0.1391,0.13668,0.152,0.13486,0.13582,0.13373,0.13655,0.078099,0.078874,0.07937,0.079618,0.079775,0.079323,0.080141,0.077858,0.07863,0.081708,0.078525,0.078037,0.07909

5,0.080114,0.077895,0.077606,0.07722,0.1392,0.13589,0.13651,0.14543,0.12854,0.13659,0.15641,0.13463,0.13838,0.12955,0.13993,0.13604,0.13049,0.14016,0.13297,0.13538,0.07885,0.078318,0.078038,0.077138,0.077641,0.077462,0.080253,0.080126,0.080123,0.078466,0.07968,0.077144,0.08029,0.079384,0.079008,0.077637,0.077756,0.079665,0.078758,0.12175,0.1367,0.13672,0.13986,0.13766,0.13633,0.1406,0.13475,0.13484,0.13031,0.13702,0.13254,0.13755,0.078138,0.076458,0.080188,0.077778,0.078456,0.078127,0.079519,0.078514,0.080715,0.078455,0.079098,0.077865,0.078272,0.078044,0.07753,0.078607,0.079806,0.078526,0.078802,0.078737,0.078033,0.14211,0.13065,0.13536,0.13398,0.12772,0.14322,0.15086,0.14454,0.13597,0.079635,0.078903,0.078514,0.079721,0.077968,0.080071,0.080177,0.078904,0.077503,0.077849,0.078673,0.078868,0.079026,0.078779,0.07908,0.079131,0.078681,0.077606,0.079145,0.078052,0.080483,0.080259,0.077613,0.078962,0.079338,0.1305,0.1358,0.12103,0.12898,0.078984,0.078112,0.080152,0.079318,0.079805,0.079685,0.078855,0.079154,0.078508,0.078284,0.079544,0.07731,0.077541,0.078626,0.078738,0.07734,0.079119,0.079147,0.076386,0.077735,0.077959,0.078178,0.077646,0.078313,0.078061,0.079189,0.078261,0.078853,0.079243,0.079302,0.078994,0.080174,0.078602,0.077838,0.078908,0.077988,0.079181,0.078423,0.078455,0.079843,0.078481,0.07838,0.078611,0.078465,0.07945,0.078879,0.078248,0.077789,0.078913,0.079275,0.079265,0.077863,0.077954,0.07939,0.078297,0.078559,0.07928,0.078062,0.078193,0.078036,0.07928,0.077516,0.077602,0.077645,0.079337,0.07909,0.079469,0.078651,0.077252,0.079618,0.07991,0.077193,0.078937,0.078763,0.077585,0.079398,0.080046,0.08058,0.079853,0.078505,0.080324,0.078618,0.078034,0.079239,0.078238,0.079427,0.07946,0.078428,0.078338,0.077217,0.079748,0.077851,0.077154,0.078732,0.079463,0.078651,0.077665,0.078978,0.077259,0.077878,0.079842,0.078764,0.07969,0.079764,0.078712,0.079498,0.079933,0.079004,0.080212,0.079494,0.078195,0.077831,0.07936,0.078233,0.079502,0.077796,0.077285,0.078187,0.078651,0.079907,0.078926,0.078144,0.078171,0.079272,0.078368,0.080525,0.079321,0.079147,0.077919,0.077942,0.078106,0.07836,0.077286,0.078599,0.078412,0.078294,0.077438,0.077662,0.080502,0.080157,0.079122,0.078941,0.077314,0.077259,0.080489,0.07853,0.078698,0.078718,0.078257,0.078895,0.078291,0.078159,0.079189,0.079125,0.078124,0.078849,0.078647,0.079956,0.078505,0.078077,0.078365,0.077922,0.07822,0.078098,0.079071,0.078101,0.078927,0.079121,0.078925,0.079248,0.079542,0.077444,0.07798,0.079399,0.078443,0.07771,0.078578,0.077256,0.07814,0.079621,0.078213,0.079212,0.078989,0.07804,0.079064,0.076672,0.07819,0.079091,0.077856,0.077677,0.078894,0.078933,0.079762,0.078048,0.077921

0.1947,0.1965,0.20131,0.19445,0.19733,0.19589,0.198,0.19522,0.19578,0.19595,0.19568,0.19718,0.19787,0.19525,0.19844,0.19486,0.19547,0.19664,0.19773,0.19624,0.29562,0.30668,0.28278,0.30213,0.19552,0.19753,0.19359,0.19387,0.19714,0.19488,0.19734,0.19924,0.19561,0.19487,0.19677,0.1989,0.19753,0.19386,0.19578,0.4038,0.28308,0.28306,0.28904,0.29185,0.28796,0.32323,0.19692,0.19634,0.19251,0.19572,0.19615,0.19754,0.19325,0.19276,0.19605,0.19537,0.19329,0.19769,0.19662,0.19968,0.19457,0.38648,0.41152,0.30189,0.30211,0.29544,0.29558,0.27443,0.28014,0.30046,0.31051,0.19541,0.19856,0.19619,0.19548,0.19836,0.1937,0.19746,0.1979,0.19591,0.19511,0.19383,0.19762,0.1942,0.19691,0.19522,0.39807,0.37738,0.39039,0.31205,0.2911,0.26025,0.30618,0.29476,0.30891,0.28833,0.29324,0.30575,0.1943,0.19788,0.19559,0.19614,0.19533,0.19541,0.19395,0.19684,0.19621,0.19433,0.19372,0.193,0.19868,0.19698,0.19544,0.19754,0.40512,0.3

6291,0.4018,0.41408,0.27449,0.28925,0.29674,0.2921,0.30369,0.30956,0.2  
8563,0.29918,0.31668,0.27548,0.19618,0.1937,0.19363,0.19786,0.19653,0.  
19418,0.19912,0.19507,0.19507,0.1998,0.19982,0.19957,0.19452,0.19535,0.  
.19735,0.19877,0.37855,0.39112,0.3774,0.37099,0.43728,0.42072,0.29331,  
0.30237,0.31116,0.28759,0.28682,0.29882,0.29029,0.29984,0.2709,0.30122  
,0.19755,0.19639,0.19593,0.19626,0.19902,0.19594,0.19121,0.19595,0.195  
5,0.19763,0.1972,0.19732,0.20185,0.19685,0.1945,0.19658,0.19533,0.3862  
9,0.39536,0.41057,0.38248,0.3927,0.35323,0.30807,0.34314,0.29154,0.288  
14,0.27772,0.30997,0.28615,0.29765,0.30427,0.33107,0.3325,0.19566,0.19  
599,0.1964,0.19865,0.19795,0.19879,0.19313,0.19827,0.19613,0.19389,0.1  
9499,0.19268,0.19567,0.13582,0.13921,0.1409,0.19769,0.3779,0.37797,0.3  
8967,0.39528,0.39281,0.39948,0.3861,0.31281,0.30269,0.30106,0.31722,0.  
29804,0.28726,0.29355,0.276,0.30549,0.27703,0.26925,0.19934,0.19692,0.  
19664,0.19465,0.19319,0.19261,0.19713,0.19317,0.19399,0.19881,0.19519,  
0.12651,0.13994,0.13275,0.12115,0.12787,0.13394,0.19435,0.38787,0.4124  
7,0.40462,0.39497,0.38009,0.37656,0.41102,0.29272,0.28499,0.29149,0.25  
687,0.29787,0.29578,0.28159,0.31956,0.27645,0.30069,0.27726,0.19563,0.  
19413,0.19437,0.19847,0.19646,0.19451,0.19889,0.19768,0.19537,0.128,0.  
13011,0.1311,0.13054,0.13087,0.12117,0.13508,0.13677,0.13171,0.19776,0  
.39456,0.38092,0.3953,0.43221,0.37006,0.37229,0.35359,0.29126,0.2985,0  
.28606,0.27698,0.29869,0.28708,0.2771,0.33136,0.27516,0.2937,0.28769,0  
.30746,0.19557,0.19749,0.19523,0.19554,0.19646,0.19598,0.1294,0.1314,0  
.13578,0.13996,0.14492,0.13539,0.13493,0.14195,0.13828,0.15277,0.13192  
,0.13313,0.4063,0.40768,0.37634,0.38057,0.40971,0.41707,0.39025,0.3059  
1,0.28608,0.29329,0.29055,0.30856,0.30396,0.28141,0.2944,0.2783,0.3001  
8,0.27817,0.31864,0.19512,0.19895,0.19614,0.13552,0.13448,0.13482,0.13  
429,0.13808,0.1336,0.15295,0.13652,0.14875,0.13084,0.13208,0.14123,0.1  
3583,0.13149,0.14695,0.36924,0.37209,0.42287,0.3739,0.40862,0.41531,0.  
41463,0.41854,0.37553,0.3054,0.29832,0.30617,0.29333,0.29477,0.28707,0  
.28465,0.29394,0.29704,0.2919,0.27801,0.1389,0.14081,0.13517,0.13984,0  
.12646,0.13768,0.13546,0.1276,0.13704,0.14022,0.13291,0.12716,0.15636,  
0.13277,0.13941,0.12896,0.13589,0.13249,0.40744,0.40437,0.40535,0.3873  
7,0.39866,0.40046,0.41197,0.38359,0.38649,0.29038,0.28507,0.1855,0.216  
56,0.2469,0.20825,0.23572,0.23416,0.22123,0.23075,0.21543,0.12838,0.14  
346,0.12185,0.12948,0.13465,0.13509,0.11516,0.13173,0.13496,0.13661,0.  
13713,0.13842,0.1294,0.13401,0.13498,0.1277,0.15042,0.14006,0.38398,0.  
38282,0.39357,0.3966,0.3898,0.37571,0.36256,0.38006,0.35599,0.23414,0.  
22468,0.22431,0.24163,0.2272,0.21693,0.20731,0.22587,0.21857,0.22594,0  
.21841,0.14199,0.12983,0.13514,0.13183,0.13818,0.14092,0.1475,0.13643,  
0.13167,0.12313,0.13345,0.13861,0.12935,0.1369,0.13623,0.13326,0.1293,  
0.13594,0.39348,0.40044,0.38823,0.42398,0.43282,0.40745,0.39704,0.2336  
9,0.20466,0.24858,0.22134,0.22044,0.22432,0.21802,0.2172,0.21901,0.229  
12,0.21587,0.19078,0.21026,0.12596,0.13637,0.1333,0.136,0.13985,0.1337  
,0.1001,0.13563,0.14495,0.13394,0.13414,0.12685,0.13244,0.12982,0.1397  
5,0.13396,0.13243,0.12922,0.40197,0.40456,0.40809,0.40988,0.38277,0.37  
869,0.21032,0.24284,0.24293,0.22864,0.22494,0.21717,0.23022,0.21779,0.  
2154,0.2329,0.1936,0.22653,0.23557,0.22592,0.15068,0.1339,0.13343,0.12  
824,0.12673,0.14056,0.14013,0.12892,0.13435,0.13283,0.13464,0.13466,0.  
13424,0.1352,0.13424,0.13755,0.15279,0.14475,0.39589,0.39976,0.38393,0  
.41085,0.40116,0.19908,0.22681,0.22673,0.23885,0.23524,0.22386,0.21622  
,0.20994,0.23342,0.22158,0.20901,0.20924,0.21971,0.22029,0.22527,0.137  
51,0.13505,0.13042,0.12735,0.1342,0.13345,0.14446,0.12558,0.14499,0.13

677,0.13466,0.13607,0.13081,0.13573,0.13559,0.13413,0.1364,0.13993,0.3  
9394,0.3932,0.38329,0.27361,0.23954,0.27403,0.25138,0.23355,0.24724,0.  
21389,0.23019,0.22784,0.23131,0.22417,0.22243,0.2192,0.23886,0.23784,0  
.22751,0.2634,0.13923,0.13475,0.14037,0.13432,0.133,0.1439,0.13638,0.1  
3259,0.1434,0.1235,0.14483,0.13475,0.13973,0.1249,0.14581,0.139,0.1342  
6,0.13339,0.40334,0.21737,0.20784,0.22208,0.23666,0.25519,0.23274,0.20  
19,0.2385,0.26691,0.22601,0.2298,0.22237,0.21629,0.24657,0.20498,0.196  
35,0.22317,0.22576,0.13657,0.13356,0.12497,0.1388,0.13608,0.13347,0.13  
7,0.13433,0.12608,0.13767,0.13084,0.13419,0.13596,0.13864,0.13327,0.12  
66,0.13982,0.071754,0.23203,0.23929,0.21221,0.23491,0.23645,0.2528,0.2  
1525,0.25291,0.2362,0.21341,0.22376,0.22397,0.21599,0.21956,0.2014,0.2  
1635,0.25229,0.21724,0.22014,0.12534,0.13387,0.13434,0.12898,0.13498,0  
.13651,0.13202,0.1355,0.13369,0.13474,0.13425,0.12203,0.13234,0.13524,  
0.12932,0.12629,0.13369,0.07401,0.22904,0.22496,0.22215,0.15362,0.2362  
5,0.23202,0.22892,0.24769,0.24819,0.23222,0.23542,0.2264,0.21116,0.225  
09,0.20701,0.22783,0.21383,0.22561,0.13304,0.13281,0.13016,0.13326,0.1  
3501,0.13659,0.13199,0.14248,0.12943,0.12208,0.11296,0.13485,0.12807,0  
.13439,0.12386,0.12279,0.13054,0.1386,0.073554,0.25509,0.2327,0.21692,  
0.20023,0.24447,0.25202,0.2154,0.23724,0.19794,0.23188,0.24082,0.21754  
,0.20998,0.20693,0.25012,0.22789,0.19293,0.24492,0.13776,0.13716,0.136  
86,0.13288,0.1384,0.13974,0.14143,0.1305,0.13552,0.14223,0.11601,0.136  
77,0.11833,0.13906,0.13527,0.12544,0.13573,0.072403,0.074423,0.073491,  
0.21899,0.28197,0.226,0.23185,0.20634,0.21907,0.19411,0.19798,0.23422,  
0.2546,0.20413,0.23437,0.23795,0.22349,0.21397,0.1426,0.13398,0.13603,  
0.13259,0.12056,0.14139,0.13202,0.1397,0.13078,0.13916,0.13178,0.13334  
,0.13415,0.1462,0.14257,0.13498,0.14049,0.13302,0.072508,0.072493,0.07  
2199,0.074511,0.24695,0.2561,0.23573,0.12453,0.23572,0.25397,0.18936,0  
.25359,0.20892,0.20931,0.2196,0.21761,0.1424,0.1236,0.12901,0.13413,0.  
13393,0.14675,0.13287,0.12956,0.13515,0.13341,0.14861,0.13955,0.13511,  
0.13747,0.12104,0.13676,0.13589,0.13683,0.14341,0.13676,0.071663,0.071  
817,0.074198,0.072936,0.073404,0.073066,0.23759,0.23561,0.21591,0.1848  
8,0.24697,0.2612,0.23448,0.20603,0.14038,0.11962,0.14112,0.13746,0.134  
19,0.15331,0.13408,0.1273,0.13846,0.13578,0.13225,0.13398,0.13429,0.12  
781,0.13429,0.13745,0.12925,0.13563,0.1583,0.13503,0.13704,0.1343,0.13  
983,0.073181,0.07286,0.072519,0.072508,0.072131,0.072081,0.24805,0.272  
32,0.16571,0.22472,0.24452,0.073503,0.073108,0.13654,0.12766,0.15031,0  
.13411,0.137,0.13541,0.13518,0.14064,0.13725,0.13466,0.13282,0.13692,0  
.11989,0.12345,0.13558,0.15149,0.14485,0.14257,0.13285,0.1405,0.12692,  
0.073237,0.072107,0.073823,0.07431,0.073313,0.071814,0.073287,0.072779  
,0.075037,0.073048,0.22416,0.25526,0.073547,0.073834,0.073492,0.073384  
,0.1321,0.13682,0.14001,0.15324,0.13106,0.13083,0.14071,0.13741,0.1233  
4,0.13433,0.11639,0.14231,0.13743,0.1345,0.15136,0.13294,0.13354,0.131  
87,0.13478,0.073089,0.073135,0.073237,0.074155,0.074302,0.073844,0.073  
901,0.072776,0.073188,0.075636,0.073064,0.072467,0.073327,0.074206,0.0  
72029,0.072448,0.070665,0.13713,0.13505,0.13559,0.14385,0.12698,0.1351  
5,0.15601,0.13281,0.13637,0.12766,0.13802,0.13489,0.12744,0.13866,0.13  
152,0.13292,0.074034,0.07333,0.071753,0.07141,0.071714,0.071932,0.0746  
21,0.074607,0.073631,0.073316,0.073825,0.071639,0.074396,0.074347,0.07  
4056,0.072298,0.072419,0.07358,0.073173,0.11938,0.13495,0.13491,0.1385  
4,0.13641,0.13384,0.13883,0.13231,0.13318,0.12845,0.13431,0.13062,0.13  
598,0.072114,0.071291,0.075158,0.072145,0.073404,0.072495,0.073945,0.0  
72989,0.075575,0.073329,0.073681,0.071436,0.07224,0.072235,0.072178,0.



073081,0.073622,0.072376,0.073111,0.072611,0.073168,0.142,0.12885,0.13  
37,0.13138,0.1255,0.1411,0.14993,0.14323,0.13411,0.074411,0.072479,0.0  
73476,0.074048,0.07276,0.074007,0.074532,0.073595,0.071862,0.07206,0.0  
73047,0.073335,0.073024,0.073021,0.07305,0.073492,0.073845,0.071964,0.  
073534,0.072222,0.074226,0.074696,0.071938,0.073113,0.073286,0.1288,0.  
134,0.11886,0.12697,0.073536,0.073172,0.074892,0.073742,0.074499,0.074  
211,0.073629,0.073696,0.073116,0.073066,0.073935,0.072277,0.072356,0.0  
72773,0.073548,0.071879,0.07421,0.073304,0.070591,0.072622,0.072471,0.  
072567,0.072199,0.072685,0.072475,0.073421,0.072492,0.073321,0.073903,  
0.073655,0.072964,0.073811,0.072952,0.071326,0.073323,0.072159,0.07358  
2,0.072508,0.07309,0.074326,0.073318,0.072267,0.073384,0.072912,0.0740  
13,0.073121,0.072667,0.071865,0.07293,0.073967,0.073834,0.071793,0.072  
168,0.073463,0.072041,0.072425,0.073214,0.072015,0.072937,0.073046,0.0  
73299,0.072326,0.072002,0.072295,0.073369,0.073442,0.073899,0.072481,0  
.071412,0.073811,0.074777,0.071776,0.073568,0.073308,0.072322,0.073401  
,0.074565,0.074903,0.074528,0.072586,0.074466,0.073642,0.072831,0.0734  
13,0.07203,0.073357,0.074163,0.073228,0.072526,0.071804,0.074521,0.072  
426,0.072166,0.073098,0.07404,0.072292,0.072505,0.07371,0.071563,0.072  
531,0.073782,0.073038,0.073853,0.07468,0.072886,0.07416,0.074048,0.073  
305,0.07458,0.074142,0.072642,0.072697,0.073598,0.072398,0.074193,0.07  
2558,0.071346,0.072077,0.073224,0.074281,0.072618,0.072489,0.072656,0.  
072374,0.07304,0.07487,0.074106,0.073543,0.072476,0.071987,0.072659,0.  
073033,0.071095,0.073443,0.072405,0.072785,0.071544,0.072227,0.074543,  
0.074187,0.073457,0.073326,0.07183,0.071446,0.074551,0.073318,0.072569  
,0.073403,0.072414,0.073536,0.072396,0.072782,0.074049,0.07417,0.07244  
1,0.073548,0.072931,0.074068,0.072948,0.07262,0.072717,0.072591,0.0728  
58,0.072496,0.073711,0.072844,0.072977,0.073844,0.073332,0.073564,0.07  
4655,0.072207,0.071958,0.073453,0.072821,0.072506,0.072399,0.071673,0.  
072354,0.074143,0.072605,0.072982,0.073958,0.072142,0.0736,0.071821,0.  
072517,0.073056,0.072767,0.072116,0.073711,0.073321,0.074377,0.072471,  
0.071686  
0.19693,0.19745,0.20256,0.19567,0.19879,0.19816,0.20022,0.1981,0.19672  
,0.19824,0.19816,0.19802,0.19924,0.19649,0.2,0.19591,0.19716,0.1981,0.  
19979,0.19852,0.28641,0.30242,0.2804,0.30368,0.19622,0.19864,0.19586,0  
.19514,0.19982,0.19761,0.19811,0.20127,0.1988,0.19741,0.19634,0.19976,  
0.19877,0.19794,0.19728,0.37315,0.27767,0.27962,0.28775,0.28772,0.2828  
,0.32211,0.19899,0.19861,0.19452,0.19863,0.19908,0.19902,0.19503,0.196  
6,0.19957,0.19692,0.19603,0.19939,0.19815,0.20167,0.19622,0.38393,0.39  
501,0.30028,0.29615,0.2917,0.28879,0.27197,0.276,0.29374,0.3024,0.1981  
3,0.19872,0.19736,0.19593,0.19891,0.1961,0.19923,0.19859,0.19766,0.197  
83,0.19625,0.19938,0.19768,0.19962,0.19688,0.39213,0.36356,0.38648,0.3  
1318,0.28612,0.25769,0.30625,0.2951,0.30111,0.28229,0.2869,0.30131,0.1  
9558,0.19859,0.1966,0.19824,0.19801,0.19671,0.19625,0.19831,0.19785,0.  
19497,0.19547,0.19554,0.20026,0.19965,0.19677,0.19923,0.3804,0.34728,0  
.3982,0.40021,0.27832,0.28885,0.29292,0.28541,0.30253,0.30528,0.28337,  
0.29123,0.31343,0.27253,0.19839,0.1972,0.1965,0.20002,0.19796,0.19603,  
0.20081,0.19662,0.19511,0.20098,0.20221,0.20032,0.19547,0.19702,0.1994  
,0.2004,0.37068,0.38349,0.36734,0.35992,0.42209,0.41882,0.29018,0.3035  
4,0.31038,0.279,0.28389,0.29026,0.28903,0.29543,0.27649,0.29522,0.1991  
7,0.19741,0.19912,0.1983,0.20003,0.1973,0.19352,0.19865,0.19906,0.1998  
3,0.19944,0.1995,0.203,0.19829,0.19658,0.19876,0.1965,0.38336,0.3843,0  
.41395,0.37118,0.38231,0.34751,0.30481,0.34167,0.28325,0.28354,0.26534

,0.30406,0.28239,0.29283,0.29592,0.31389,0.33063,0.19853,0.19922,0.19876,0.20037,0.19844,0.20127,0.19646,0.19871,0.19828,0.19525,0.19693,0.19537,0.19757,0.13359,0.13766,0.14013,0.1988,0.37549,0.36777,0.37227,0.38519,0.38463,0.38582,0.38069,0.29828,0.29627,0.28797,0.30575,0.29644,0.28342,0.28743,0.27358,0.30477,0.27518,0.2643,0.20036,0.19936,0.19741,0.19798,0.19476,0.19551,0.19917,0.19572,0.19666,0.20081,0.19704,0.12506,0.13934,0.13151,0.11895,0.12581,0.13317,0.19565,0.37869,0.40005,0.39925,0.38284,0.36839,0.36294,0.40007,0.29259,0.28097,0.28335,0.2523,0.30072,0.29445,0.2822,0.3097,0.27371,0.29756,0.27383,0.19732,0.197,0.19611,0.20097,0.19817,0.1954,0.20073,0.19947,0.19764,0.12561,0.12818,0.12934,0.1294,0.12902,0.11884,0.13389,0.13555,0.13056,0.19901,0.37643,0.37861,0.37592,0.40634,0.36352,0.35466,0.34352,0.28636,0.29327,0.28075,0.27437,0.29936,0.2866,0.27184,0.33448,0.27464,0.2886,0.28259,0.29763,0.19792,0.1994,0.19638,0.19816,0.19807,0.19637,0.12762,0.12991,0.13467,0.13861,0.14334,0.13501,0.13362,0.13925,0.13571,0.1525,0.12989,0.13207,0.39887,0.39057,0.36893,0.36809,0.41339,0.41778,0.38072,0.30413,0.28154,0.2871,0.28088,0.30622,0.29894,0.27843,0.29304,0.26943,0.29066,0.2772,0.31604,0.19749,0.19891,0.19817,0.13468,0.13378,0.13329,0.13268,0.13676,0.13249,0.15171,0.13509,0.14826,0.12964,0.13098,0.1405,0.13447,0.13008,0.14578,0.37246,0.3646,0.39806,0.36132,0.39872,0.40139,0.39724,0.39988,0.37206,0.29814,0.29743,0.30411,0.28301,0.29718,0.28266,0.27957,0.29602,0.30008,0.28478,0.27792,0.13701,0.14031,0.13389,0.13894,0.12457,0.13689,0.13414,0.12606,0.13609,0.1395,0.13032,0.12535,0.15612,0.13212,0.13886,0.12765,0.13486,0.1306,0.38573,0.39436,0.40671,0.37461,0.37763,0.39516,0.40115,0.38116,0.36953,0.28633,0.28391,0.18251,0.20877,0.24167,0.2048,0.22926,0.22914,0.21562,0.22287,0.20766,0.12623,0.14248,0.11951,0.12784,0.13304,0.13328,0.1132,0.13034,0.13415,0.13512,0.13573,0.13658,0.12706,0.13311,0.13369,0.12589,0.14984,0.13907,0.38105,0.37295,0.38448,0.38505,0.37266,0.36643,0.34462,0.3782,0.34962,0.22555,0.21708,0.22113,0.23732,0.22154,0.21276,0.20418,0.22104,0.21313,0.22221,0.2127,0.14055,0.12843,0.13368,0.12956,0.13664,0.14016,0.14719,0.13591,0.12949,0.12109,0.13256,0.13783,0.12847,0.13552,0.13547,0.13234,0.12822,0.13471,0.3686,0.38997,0.37644,0.42117,0.40666,0.39954,0.39082,0.22567,0.19865,0.24184,0.21902,0.21714,0.21948,0.21243,0.21553,0.20998,0.22382,0.20831,0.18792,0.20969,0.12401,0.13481,0.13252,0.13522,0.13936,0.13238,0.097659,0.13391,0.14378,0.13272,0.13335,0.12511,0.13168,0.12793,0.13892,0.13299,0.13093,0.12821,0.38531,0.4027,0.40499,0.39414,0.36815,0.37377,0.2038,0.23205,0.23585,0.21618,0.22034,0.21475,0.22905,0.21098,0.21228,0.23152,0.18994,0.21989,0.22978,0.22043,0.14923,0.13311,0.13222,0.12665,0.12436,0.13882,0.13846,0.12671,0.13374,0.13199,0.13272,0.13284,0.13246,0.1336,0.13338,0.13728,0.15164,0.14399,0.37938,0.38654,0.37351,0.39615,0.38764,0.19469,0.22429,0.22108,0.23453,0.22802,0.21805,0.21246,0.20445,0.22833,0.21464,0.20492,0.20657,0.21697,0.21069,0.21949,0.13573,0.13428,0.1285,0.12542,0.13324,0.13195,0.14426,0.12346,0.14426,0.13471,0.13223,0.13528,0.12917,0.13419,0.13424,0.13351,0.13614,0.13923,0.39136,0.38566,0.37443,0.26893,0.23257,0.27215,0.23949,0.22325,0.23715,0.2061,0.23132,0.22057,0.22837,0.22088,0.22166,0.21481,0.23638,0.2294,0.2251,0.25761,0.13835,0.13444,0.13886,0.13297,0.13196,0.14356,0.13521,0.13171,0.14301,0.12188,0.14426,0.13427,0.13903,0.12395,0.14603,0.13841,0.13316,0.13177,0.41255,0.20431,0.19934,0.21285,0.2199,0.24252,0.22656,0.19669,0.22717,0.25731,0.22476,0.22493,0.21811,0.21613,0.23999,0.20082,0.19601,0.2149,0.21941,0.13424,0.13224,0.124,0.1383,0.

13436,0.13243,0.13587,0.13341,0.1241,0.13667,0.13017,0.13226,0.13437,0.  
.1373,0.13202,0.12407,0.13912,0.066643,0.224,0.23259,0.20522,0.23138,0.  
.22612,0.2416,0.20858,0.24342,0.22561,0.20684,0.22118,0.21645,0.21056,  
0.21463,0.19664,0.21318,0.24816,0.21868,0.21622,0.12409,0.13322,0.1325  
5,0.12778,0.13379,0.13534,0.13055,0.13336,0.13194,0.13286,0.13358,0.12  
101,0.13138,0.13352,0.12744,0.12369,0.13282,0.069315,0.22331,0.21293,0.  
.21287,0.14847,0.22474,0.22544,0.22676,0.2362,0.24329,0.22367,0.23203,  
0.22364,0.20997,0.21955,0.204,0.21784,0.2074,0.22175,0.13022,0.1315,0.  
12811,0.13178,0.1343,0.13563,0.1311,0.1413,0.12771,0.11964,0.11032,0.1  
336,0.12656,0.13306,0.12187,0.12085,0.12943,0.13811,0.068494,0.24214,0.  
.23441,0.20946,0.19605,0.22985,0.23689,0.21221,0.22689,0.19321,0.22106  
,0.2386,0.21235,0.20469,0.20214,0.24551,0.22211,0.18953,0.24071,0.1359  
1,0.13595,0.13559,0.13165,0.13739,0.13872,0.1404,0.12888,0.13357,0.142  
1,0.11328,0.13636,0.11612,0.13758,0.13324,0.12323,0.13425,0.06788,0.06  
9667,0.06957,0.21307,0.27962,0.22361,0.21877,0.20229,0.2084,0.18915,0.  
19123,0.22705,0.2506,0.20018,0.22844,0.22881,0.2187,0.21057,0.14258,0.  
13326,0.13561,0.13221,0.11878,0.1404,0.1309,0.13947,0.1286,0.13732,0.1  
3025,0.13238,0.13302,0.14446,0.14145,0.13386,0.13998,0.13182,0.067207,  
0.067695,0.066876,0.069427,0.23789,0.24044,0.22956,0.11998,0.2276,0.24  
87,0.18686,0.2478,0.20487,0.20441,0.21381,0.21126,0.1415,0.12158,0.127  
48,0.13265,0.1324,0.14644,0.13096,0.12805,0.13414,0.13177,0.14812,0.13  
847,0.13375,0.13541,0.11933,0.13604,0.13392,0.13547,0.14259,0.13541,0.  
067412,0.067699,0.068622,0.067828,0.068403,0.068173,0.23059,0.22421,0.  
20448,0.17574,0.23977,0.24308,0.22306,0.19574,0.13896,0.11788,0.14004,  
0.13528,0.13266,0.15379,0.1327,0.12579,0.13762,0.13442,0.1305,0.13306,  
0.13293,0.12606,0.13244,0.13677,0.1277,0.13404,0.15745,0.13313,0.13592  
,0.13381,0.13813,0.069094,0.067656,0.067483,0.068795,0.067242,0.067622  
,0.23722,0.25888,0.16109,0.21823,0.23052,0.068926,0.068334,0.13471,0.1  
2582,0.14951,0.13258,0.1361,0.13428,0.13323,0.13939,0.13595,0.13356,0.  
1311,0.13582,0.11683,0.12121,0.13475,0.15144,0.14363,0.14125,0.13185,0.  
.13883,0.12439,0.068389,0.066962,0.069261,0.069303,0.068017,0.067452,0.  
.068772,0.068257,0.07021,0.06882,0.21746,0.24649,0.068514,0.069118,0.0  
68652,0.06789,0.12983,0.13599,0.13888,0.15246,0.12921,0.12909,0.1393,0.  
.13656,0.12208,0.13366,0.11396,0.14081,0.13558,0.13231,0.15041,0.13188  
,0.13248,0.13085,0.13239,0.067952,0.068437,0.068445,0.069599,0.069381,  
0.068114,0.069032,0.068056,0.068918,0.070404,0.069116,0.067869,0.06883  
4,0.069412,0.067226,0.067252,0.066589,0.13545,0.13331,0.1342,0.14312,0.  
.12501,0.1336,0.15603,0.13155,0.13545,0.12581,0.13697,0.13291,0.12617,  
0.13772,0.13033,0.1316,0.069141,0.068556,0.067205,0.066652,0.067692,0.  
067217,0.070044,0.070179,0.068664,0.068339,0.069388,0.067251,0.069001,  
0.069791,0.068842,0.067791,0.068237,0.068674,0.068437,0.11784,0.13341,  
0.13295,0.13676,0.13548,0.1324,0.13831,0.13048,0.13215,0.12669,0.13352  
,0.12876,0.13392,0.067534,0.066299,0.069612,0.068259,0.068845,0.067764  
,0.068954,0.068361,0.070742,0.068409,0.068469,0.066836,0.067546,0.0671  
51,0.068231,0.067345,0.068813,0.067419,0.068136,0.068616,0.068316,0.14  
173,0.12704,0.1319,0.12967,0.12393,0.14125,0.14942,0.14254,0.1327,0.06  
9828,0.06704,0.068602,0.069915,0.068141,0.070351,0.069708,0.068766,0.0  
67413,0.067612,0.068368,0.068094,0.068153,0.068288,0.068403,0.068175,0.  
.068828,0.067517,0.06901,0.067215,0.06988,0.068864,0.067382,0.067858,0.  
.068596,0.12686,0.13269,0.11672,0.12552,0.069108,0.068609,0.069895,0.0  
68811,0.069872,0.068922,0.069098,0.068642,0.067554,0.06854,0.06898,0.0  
67496,0.067881,0.067654,0.068893,0.067019,0.069773,0.068666,0.066555,0

.068048,0.068481,0.068312,0.068201,0.068398,0.067861,0.068558,0.067751  
,0.06818,0.069577,0.068775,0.06843,0.069062,0.068254,0.066698,0.069145  
,0.06757,0.068652,0.06821,0.068415,0.070124,0.069118,0.068124,0.068246  
,0.06825,0.069177,0.068202,0.067766,0.067618,0.067951,0.069521,0.06906  
,0.06745,0.067293,0.068575,0.067297,0.067998,0.068174,0.06744,0.068536  
,0.068335,0.068155,0.06716,0.066673,0.067698,0.068927,0.068415,0.06898  
2,0.067476,0.066847,0.068987,0.070027,0.066861,0.069007,0.068833,0.068  
138,0.068597,0.070285,0.070506,0.069614,0.067506,0.0694,0.069066,0.068  
374,0.06857,0.066867,0.067802,0.069101,0.069118,0.067874,0.067285,0.06  
9917,0.068009,0.067448,0.0682,0.069067,0.067979,0.067273,0.068448,0.06  
7327,0.068276,0.068655,0.068055,0.069024,0.070384,0.068482,0.069101,0.  
069826,0.068871,0.06992,0.069185,0.06929,0.068713,0.069473,0.067775,0.  
069589,0.068187,0.067041,0.06734,0.068108,0.068474,0.068399,0.067646,0.  
.068581,0.068312,0.067941,0.070466,0.069713,0.068813,0.067819,0.067594  
,0.067797,0.068127,0.066752,0.06896,0.067682,0.068526,0.067325,0.06758  
1,0.069842,0.068901,0.069064,0.069093,0.066827,0.066831,0.069982,0.068  
412,0.067696,0.069192,0.067962,0.069048,0.067632,0.068044,0.069012,0.0  
69139,0.068082,0.068524,0.068594,0.070159,0.068328,0.067337,0.068098,0.  
.067881,0.068225,0.068384,0.068881,0.067825,0.068358,0.069554,0.068985  
,0.068602,0.070461,0.067699,0.067571,0.068823,0.06882,0.067811,0.06834  
2,0.067219,0.067505,0.069726,0.068339,0.068008,0.068972,0.067492,0.068  
995,0.067669,0.067856,0.068689,0.067606,0.06758,0.069138,0.069288,0.06  
9475,0.067918,0.066835  
0.19809,0.19769,0.20391,0.19865,0.20106,0.19986,0.20203,0.20031,0.1989  
,0.19988,0.20081,0.20064,0.20066,0.19862,0.20285,0.19657,0.19778,0.199  
26,0.20183,0.20028,0.27844,0.29988,0.27561,0.29964,0.19763,0.20037,0.1  
9813,0.19926,0.20141,0.19934,0.20014,0.20122,0.20115,0.19776,0.19788,0.  
.20061,0.2008,0.19817,0.19923,0.3698,0.27824,0.27535,0.29077,0.28463,0.  
.28196,0.32191,0.20078,0.2004,0.19637,0.20022,0.20142,0.19918,0.19665,  
0.1986,0.19966,0.1997,0.19787,0.20066,0.19949,0.20279,0.19896,0.36874,  
0.36999,0.30159,0.29111,0.2861,0.28606,0.27308,0.2718,0.29029,0.29495,  
0.19831,0.20111,0.19979,0.19734,0.1995,0.1982,0.20137,0.20032,0.1992,0.  
.20004,0.19861,0.20117,0.19881,0.20016,0.1999,0.38272,0.36194,0.37857,  
0.306,0.28916,0.2622,0.30279,0.29167,0.29397,0.28691,0.28317,0.29137,0.  
.19797,0.19975,0.19937,0.19936,0.20102,0.19989,0.19743,0.20115,0.19922  
,0.19758,0.19799,0.19698,0.2008,0.20116,0.19835,0.20114,0.37828,0.3354  
9,0.37943,0.3757,0.27838,0.28303,0.28836,0.28223,0.2957,0.30259,0.2860  
8,0.28485,0.30696,0.26698,0.19985,0.19794,0.19727,0.2005,0.19884,0.198  
15,0.20245,0.19906,0.19747,0.20162,0.20238,0.20225,0.19692,0.19899,0.2  
0066,0.20192,0.36096,0.38369,0.36071,0.34424,0.40604,0.40446,0.28847,0.  
.30589,0.30018,0.27647,0.28538,0.29181,0.28426,0.29204,0.27635,0.2853,  
0.20104,0.19878,0.20027,0.19807,0.20176,0.19829,0.19546,0.20054,0.2009  
8,0.20175,0.20151,0.20194,0.20516,0.20027,0.19959,0.19906,0.19844,0.36  
344,0.38169,0.39592,0.35157,0.36762,0.33965,0.2983,0.34665,0.27934,0.2  
7723,0.25927,0.301,0.276,0.29501,0.29038,0.31289,0.32505,0.19979,0.200  
72,0.20143,0.20135,0.19918,0.20368,0.19936,0.20085,0.20038,0.19684,0.1  
9832,0.19751,0.19919,0.13249,0.1367,0.13927,0.2002,0.37776,0.37491,0.3  
6005,0.38289,0.37526,0.38003,0.36539,0.2928,0.29072,0.28378,0.30489,0.  
29108,0.28638,0.28377,0.2692,0.30237,0.27406,0.26266,0.20245,0.20222,0.  
.19873,0.19867,0.19592,0.19662,0.19995,0.1977,0.19894,0.20332,0.1977,0.  
.12273,0.13859,0.13058,0.11717,0.12379,0.13225,0.19823,0.37212,0.38588  
,0.3879,0.3756,0.3671,0.35851,0.38341,0.28821,0.27948,0.28558,0.25359,

0.29682,0.29514,0.28352,0.30535,0.272,0.29117,0.26558,0.19902,0.19867,  
0.19687,0.20142,0.20077,0.19708,0.20136,0.20104,0.20035,0.12465,0.1271  
7,0.12765,0.12833,0.12717,0.11711,0.13271,0.1346,0.12939,0.19998,0.376  
25,0.36416,0.36957,0.40355,0.37242,0.34476,0.3438,0.28917,0.29047,0.27  
6,0.27251,0.29816,0.28265,0.26801,0.3261,0.27429,0.29078,0.28258,0.291  
04,0.19983,0.19958,0.19621,0.19931,0.2006,0.19913,0.12603,0.12818,0.13  
368,0.13755,0.14133,0.13376,0.13235,0.13882,0.13352,0.15259,0.12884,0.  
13047,0.39012,0.38164,0.34431,0.36242,0.39822,0.42323,0.37272,0.30005,  
0.28118,0.28616,0.28361,0.29973,0.29876,0.27605,0.2931,0.26681,0.29614  
,0.2755,0.31585,0.19956,0.20077,0.19952,0.13314,0.13282,0.13211,0.1317  
,0.13534,0.13107,0.15145,0.13375,0.14699,0.12804,0.12871,0.13967,0.133  
89,0.12919,0.14381,0.37523,0.34607,0.38817,0.34113,0.38585,0.40253,0.4  
0294,0.39005,0.36457,0.29051,0.30271,0.29314,0.27755,0.29377,0.28453,0.  
.27696,0.29586,0.29445,0.28414,0.27985,0.13664,0.13878,0.13332,0.13834  
,0.12325,0.13557,0.13329,0.12477,0.13547,0.13879,0.12946,0.12363,0.155  
69,0.13059,0.13901,0.12731,0.13347,0.12865,0.37664,0.36846,0.40593,0.3  
7249,0.35949,0.37419,0.38149,0.36785,0.3524,0.28183,0.28125,0.18083,0.  
20443,0.23961,0.20033,0.22623,0.22275,0.21384,0.21946,0.20437,0.12487,  
0.14207,0.11732,0.12585,0.13105,0.13235,0.11107,0.12921,0.13365,0.1337  
1,0.135,0.1366,0.12599,0.13172,0.13234,0.12449,0.14903,0.13966,0.36241  
,0.36379,0.37763,0.38222,0.36928,0.36076,0.34025,0.36289,0.33516,0.216  
53,0.2119,0.21834,0.23363,0.22247,0.21121,0.20637,0.21963,0.20787,0.21  
516,0.21073,0.14002,0.12672,0.13278,0.12845,0.1358,0.13877,0.14647,0.1  
3428,0.12828,0.11948,0.13149,0.13701,0.12713,0.13514,0.13494,0.13143,0.  
.12727,0.13329,0.36974,0.38225,0.3686,0.39844,0.4136,0.39387,0.38684,0.  
.21109,0.1906,0.23408,0.21592,0.2146,0.21606,0.20785,0.20894,0.20914,0.  
.22019,0.2073,0.18738,0.20583,0.12227,0.13352,0.13197,0.13443,0.13849,  
0.13058,0.094483,0.13325,0.14388,0.13209,0.13217,0.12325,0.1307,0.1264  
5,0.13831,0.13204,0.13014,0.12732,0.38257,0.37964,0.40483,0.37665,0.36  
177,0.36819,0.20001,0.22779,0.2307,0.20865,0.2121,0.20909,0.22627,0.20  
997,0.21167,0.23142,0.18627,0.21762,0.22434,0.2147,0.14824,0.13136,0.1  
3066,0.12476,0.123,0.13791,0.13746,0.12565,0.13237,0.1313,0.13209,0.13  
135,0.13054,0.13313,0.13264,0.13661,0.15087,0.14271,0.36329,0.36806,0.  
35711,0.38435,0.38954,0.18715,0.21628,0.21457,0.22888,0.22231,0.21134,  
0.21105,0.20318,0.22896,0.20774,0.19883,0.20118,0.213,0.2099,0.21671,0.  
.1355,0.13351,0.12711,0.12421,0.13207,0.1313,0.14356,0.121,0.14318,0.1  
3288,0.13051,0.13335,0.12865,0.13355,0.13254,0.13278,0.13524,0.13755,0.  
.37874,0.39661,0.36717,0.26038,0.2297,0.27362,0.23383,0.21504,0.23061,  
0.20073,0.23042,0.22207,0.22369,0.21883,0.22575,0.21449,0.23347,0.2304  
4,0.22472,0.25687,0.13691,0.13325,0.13758,0.13177,0.1309,0.14326,0.134  
51,0.1307,0.14299,0.12078,0.14387,0.13322,0.13792,0.12307,0.1457,0.136  
65,0.13299,0.13042,0.4073,0.20061,0.18972,0.20757,0.21449,0.24516,0.22  
246,0.19583,0.22555,0.2508,0.2221,0.2158,0.21593,0.21301,0.24152,0.199  
98,0.19348,0.21025,0.21394,0.1333,0.13058,0.12205,0.13812,0.13325,0.13  
144,0.13496,0.13136,0.12244,0.1361,0.12866,0.13086,0.13375,0.13788,0.1  
3118,0.12241,0.13898,0.063093,0.21992,0.22693,0.19643,0.22888,0.22139,  
0.23562,0.19832,0.23034,0.22152,0.20562,0.2191,0.20834,0.20915,0.21735  
,0.1956,0.21271,0.24615,0.215,0.21069,0.12283,0.13192,0.13149,0.12585,  
0.13266,0.13503,0.12852,0.13266,0.13057,0.13136,0.13247,0.11895,0.1296  
4,0.13361,0.12649,0.12164,0.13194,0.065647,0.21591,0.21012,0.20957,0.1  
4454,0.21692,0.22115,0.222,0.23446,0.23842,0.22403,0.22833,0.22038,0.2  
0665,0.21205,0.1981,0.21482,0.20307,0.22095,0.12904,0.12991,0.12689,0.

13068,0.13411,0.13397,0.13007,0.14002,0.12638,0.11766,0.10775,0.13226,  
0.12579,0.13148,0.12049,0.11988,0.12794,0.13766,0.064844,0.23661,0.227  
87,0.20889,0.18681,0.22485,0.23022,0.21144,0.2206,0.18737,0.22172,0.23  
785,0.20911,0.20487,0.1947,0.23639,0.21775,0.19035,0.23611,0.13515,0.1  
3465,0.13369,0.12965,0.13681,0.13742,0.13901,0.12668,0.13194,0.14077,0  
.11119,0.1352,0.11444,0.13636,0.1323,0.12135,0.13313,0.065187,0.066147  
,0.065595,0.21368,0.27055,0.20749,0.20685,0.19902,0.19806,0.18627,0.18  
699,0.21787,0.248,0.19995,0.22765,0.2238,0.21293,0.20643,0.14205,0.131  
66,0.13458,0.13102,0.11635,0.1406,0.13037,0.13895,0.12743,0.13604,0.12  
893,0.13053,0.13131,0.1436,0.1413,0.13285,0.13951,0.13024,0.063121,0.0  
63473,0.063702,0.065063,0.23725,0.23485,0.22246,0.11391,0.21628,0.2451  
4,0.18841,0.24162,0.19949,0.19711,0.21522,0.20671,0.14099,0.11917,0.12  
622,0.13204,0.13146,0.14635,0.12949,0.12613,0.13292,0.1304,0.14771,0.1  
376,0.13228,0.13315,0.11853,0.13433,0.13274,0.1345,0.142,0.1348,0.0630  
54,0.064146,0.064572,0.064168,0.063849,0.065185,0.21803,0.21538,0.1950  
3,0.17046,0.22346,0.23878,0.21713,0.19123,0.13802,0.11591,0.13929,0.13  
458,0.13122,0.15319,0.13167,0.12506,0.13583,0.13339,0.12937,0.13152,0.  
13232,0.1238,0.13227,0.13567,0.12574,0.13313,0.15714,0.1321,0.13434,0.  
13218,0.13758,0.065033,0.064143,0.063773,0.06483,0.063532,0.063725,0.2  
3197,0.25375,0.15541,0.21463,0.22334,0.06486,0.064321,0.13339,0.12366,  
0.14871,0.13055,0.13528,0.13315,0.13161,0.1373,0.13457,0.13223,0.13,0.  
13485,0.11459,0.12018,0.13387,0.15102,0.14323,0.14118,0.13085,0.1376,0  
.12372,0.063761,0.06261,0.066095,0.065554,0.064462,0.062832,0.064636,0  
.06488,0.064568,0.065114,0.20946,0.23906,0.063874,0.064983,0.065189,0.  
064035,0.12797,0.13495,0.13707,0.15202,0.1284,0.12731,0.13837,0.13632,  
0.1216,0.13273,0.11235,0.13996,0.13397,0.13084,0.14967,0.13081,0.131,0  
.13026,0.13088,0.064232,0.064351,0.064343,0.065775,0.065575,0.063795,0  
.064649,0.063934,0.065043,0.06565,0.065399,0.064218,0.065174,0.065599,  
0.06307,0.063795,0.063506,0.13476,0.13244,0.13329,0.14186,0.12311,0.13  
219,0.15625,0.13111,0.13408,0.12393,0.13536,0.13221,0.12412,0.13557,0.  
12952,0.13025,0.064936,0.064637,0.063056,0.063678,0.063682,0.063429,0.  
065714,0.066088,0.064291,0.064467,0.065496,0.06336,0.064182,0.066286,0  
.064475,0.063877,0.063331,0.06402,0.064608,0.11564,0.13199,0.1306,0.13  
65,0.13556,0.13102,0.13787,0.12924,0.1314,0.12431,0.13223,0.12656,0.13  
325,0.06408,0.062925,0.065478,0.064508,0.06497,0.06336,0.065115,0.0652  
71,0.066717,0.064576,0.064425,0.06389,0.064412,0.062601,0.063941,0.062  
961,0.065218,0.06366,0.064108,0.064871,0.064283,0.14017,0.12576,0.1308  
2,0.1287,0.12189,0.1402,0.14876,0.14173,0.13172,0.065879,0.062946,0.06  
436,0.065337,0.064584,0.065575,0.064994,0.064976,0.06335,0.063402,0.06  
4269,0.063837,0.064161,0.064732,0.064261,0.064647,0.064966,0.063866,0.  
064731,0.06311,0.06613,0.065082,0.063649,0.06369,0.065265,0.12599,0.13  
246,0.11454,0.12389,0.064975,0.064436,0.065525,0.064704,0.065693,0.064  
593,0.064646,0.064687,0.063396,0.065215,0.065268,0.064379,0.064037,0.0  
6356,0.064458,0.062584,0.066021,0.064475,0.062445,0.063544,0.064215,0.  
063953,0.063851,0.064952,0.063655,0.064358,0.063682,0.064002,0.065034,  
0.064747,0.064406,0.065362,0.065183,0.062795,0.06534,0.063382,0.064194  
,0.064457,0.064086,0.065764,0.064328,0.064482,0.064574,0.064607,0.0659  
69,0.065478,0.063581,0.063537,0.06365,0.065342,0.065691,0.063792,0.063  
426,0.064327,0.063346,0.06405,0.064332,0.063359,0.064645,0.064436,0.06  
3582,0.062959,0.06336,0.064199,0.064955,0.06476,0.064558,0.063574,0.06  
289,0.064885,0.066417,0.062969,0.065459,0.064699,0.064485,0.064704,0.0  
65729,0.066355,0.065846,0.063855,0.065332,0.065321,0.064865,0.064794,0

.062912,0.063733,0.064988,0.06446,0.063686,0.063234,0.066336,0.064178,  
0.063677,0.064144,0.065252,0.064435,0.063257,0.064962,0.063758,0.06403  
9,0.064349,0.064201,0.06527,0.066269,0.064682,0.06549,0.066179,0.06532  
,0.065863,0.064572,0.065364,0.064801,0.066479,0.06402,0.065948,0.06413  
7,0.062949,0.063226,0.064949,0.064759,0.064146,0.064139,0.064792,0.064  
156,0.064901,0.06622,0.065826,0.064962,0.064484,0.06377,0.064473,0.064  
393,0.062516,0.065216,0.063399,0.064868,0.063446,0.064047,0.065989,0.0  
64892,0.065267,0.064588,0.062619,0.062958,0.065762,0.063998,0.063293,0  
.064937,0.064188,0.065271,0.063502,0.064444,0.065087,0.064849,0.063723  
,0.06527,0.064403,0.065721,0.064884,0.062864,0.064522,0.064088,0.06436  
8,0.064248,0.064722,0.064283,0.065043,0.06601,0.065853,0.065176,0.0664  
57,0.06412,0.064389,0.064498,0.064537,0.064475,0.064508,0.063251,0.063  
524,0.06623,0.064715,0.063555,0.065581,0.063764,0.065313,0.06399,0.064  
321,0.064419,0.064368,0.063785,0.065214,0.065828,0.065462,0.064256,0.0  
63404  
0.19902,0.19872,0.20491,0.20109,0.20257,0.19986,0.20359,0.20045,0.2003  
8,0.2013,0.20266,0.20113,0.2028,0.2003,0.20395,0.19783,0.19805,0.20112  
,0.2027,0.20148,0.28501,0.2972,0.27325,0.30061,0.19875,0.20099,0.20021  
,0.2012,0.20282,0.20135,0.20169,0.20244,0.20128,0.19955,0.19894,0.2026  
1,0.20348,0.19933,0.20049,0.37939,0.27986,0.27193,0.28715,0.28475,0.28  
265,0.31369,0.2022,0.20256,0.19681,0.20307,0.20303,0.20059,0.19863,0.1  
9978,0.20183,0.20168,0.19904,0.20153,0.19925,0.20437,0.20072,0.36511,0  
.37183,0.30666,0.27969,0.28198,0.28854,0.26916,0.272,0.28365,0.29845,0  
.20093,0.20322,0.20041,0.19778,0.20051,0.1998,0.20268,0.20166,0.19995,  
0.2011,0.19966,0.20293,0.19989,0.20058,0.20197,0.37606,0.34999,0.38222  
,0.3085,0.28856,0.2618,0.30057,0.28956,0.29526,0.28128,0.27972,0.2879,  
0.19915,0.20219,0.20056,0.20084,0.20089,0.20035,0.19886,0.20241,0.2010  
1,0.19945,0.19927,0.19814,0.20226,0.20244,0.19988,0.20266,0.36803,0.32  
624,0.37643,0.3738,0.27831,0.29076,0.28398,0.27913,0.29064,0.29739,0.2  
7967,0.2816,0.30369,0.26401,0.20033,0.19966,0.19956,0.20197,0.20022,0.  
19998,0.20403,0.20076,0.19848,0.20335,0.20419,0.20464,0.19955,0.20034,  
0.20113,0.20187,0.35682,0.38801,0.34863,0.33914,0.39786,0.39225,0.2792  
9,0.29838,0.29777,0.27447,0.28173,0.29266,0.27974,0.28704,0.27696,0.28  
499,0.20131,0.19931,0.20211,0.19958,0.20212,0.20049,0.1976,0.20217,0.2  
0118,0.20214,0.20183,0.20295,0.20579,0.20119,0.20049,0.20165,0.19998,0  
.35256,0.38349,0.37966,0.34764,0.3717,0.35106,0.29268,0.34908,0.27757,  
0.27287,0.25713,0.3008,0.27199,0.30071,0.28509,0.30429,0.32611,0.20087  
,0.20191,0.2029,0.20225,0.20103,0.20351,0.20121,0.20338,0.20156,0.1994  
7,0.19956,0.19798,0.2003,0.13114,0.1358,0.1382,0.20209,0.36764,0.36914  
,0.36053,0.3909,0.36761,0.36014,0.3665,0.28369,0.28327,0.28441,0.30619  
,0.29295,0.28038,0.27998,0.27373,0.30695,0.27194,0.25957,0.20334,0.202  
92,0.20133,0.19912,0.19798,0.19933,0.20032,0.19893,0.20033,0.20401,0.1  
9985,0.12153,0.13856,0.12934,0.11599,0.12192,0.13063,0.20035,0.37963,0  
.37665,0.37416,0.37468,0.37134,0.355,0.37528,0.28897,0.27373,0.28458,0  
.25146,0.29434,0.29213,0.27249,0.30069,0.26842,0.28365,0.26667,0.2019,  
0.20163,0.19785,0.20354,0.20276,0.19844,0.20204,0.20299,0.20122,0.1240  
3,0.12616,0.12604,0.12803,0.12604,0.11566,0.13129,0.13367,0.129,0.2017  
3,0.36259,0.36846,0.34977,0.38662,0.35671,0.33616,0.33564,0.28489,0.29  
321,0.27935,0.26627,0.29223,0.28125,0.26736,0.32597,0.26886,0.28934,0.  
28477,0.284,0.20246,0.20179,0.1987,0.20084,0.20193,0.19995,0.12482,0.1  
2702,0.13236,0.13705,0.14051,0.132,0.13148,0.13801,0.13198,0.15285,0.1  
2803,0.12861,0.38892,0.3754,0.33763,0.36695,0.39528,0.41246,0.37411,0.

29796,0.27958,0.28503,0.27854,0.2986,0.29187,0.27602,0.28548,0.26198,0.29002,0.27772,0.31243,0.20091,0.20134,0.19969,0.13134,0.13235,0.13145,0.13034,0.13467,0.13013,0.15108,0.13249,0.14658,0.12633,0.12715,0.1385,0.13371,0.1277,0.14244,0.36923,0.35254,0.38032,0.33651,0.37155,0.39777,0.37904,0.393,0.37772,0.29034,0.29165,0.28678,0.27321,0.28592,0.2797,0.26798,0.29546,0.29454,0.28265,0.28074,0.13678,0.13882,0.13201,0.13846,0.12239,0.13465,0.13283,0.12319,0.13346,0.1385,0.12944,0.1223,0.15534,0.12947,0.13765,0.12538,0.13231,0.12721,0.38236,0.35878,0.39558,0.35122,0.36838,0.36856,0.38412,0.37031,0.34462,0.27848,0.28265,0.17765,0.20049,0.23546,0.19548,0.22507,0.22103,0.21358,0.21767,0.20297,0.12414,0.1416,0.11563,0.12609,0.13091,0.13137,0.10986,0.12789,0.13228,0.13366,0.13415,0.13495,0.12505,0.13057,0.13126,0.12258,0.14927,0.13994,0.35304,0.36213,0.37033,0.37005,0.36682,0.36519,0.33861,0.36721,0.33962,0.21215,0.21143,0.2122,0.23371,0.21598,0.20853,0.20705,0.21916,0.20519,0.21552,0.21484,0.13936,0.12486,0.13223,0.127,0.13484,0.13756,0.14635,0.13259,0.12748,0.11801,0.13049,0.13768,0.12622,0.13437,0.13489,0.1295,0.12649,0.13209,0.35585,0.38076,0.35553,0.38392,0.40149,0.38761,0.37902,0.20292,0.18585,0.22639,0.21602,0.21431,0.21366,0.20079,0.2103,0.20674,0.21958,0.20588,0.18608,0.20222,0.12096,0.13245,0.13044,0.13343,0.13831,0.12907,0.092621,0.13197,0.14269,0.13235,0.13154,0.12258,0.12993,0.12433,0.13886,0.13083,0.13,0.12614,0.37218,0.36777,0.39031,0.38051,0.34928,0.3661,0.19458,0.2263,0.22489,0.20454,0.21173,0.20793,0.2214,0.20862,0.20906,0.22658,0.18441,0.21969,0.2221,0.211,0.14805,0.13082,0.13018,0.1237,0.12173,0.13692,0.13651,0.12501,0.13148,0.13114,0.13001,0.13086,0.12895,0.1324,0.1309,0.13591,0.15042,0.14158,0.35175,0.3667,0.36351,0.36866,0.38791,0.18248,0.2073,0.2166,0.22688,0.22148,0.20728,0.20837,0.20087,0.22378,0.20744,0.19547,0.1979,0.21022,0.20841,0.21599,0.13474,0.1323,0.12665,0.12411,0.13124,0.13057,0.14321,0.11983,0.1429,0.13242,0.13017,0.13204,0.127,0.13262,0.13153,0.13159,0.13483,0.13691,0.3599,0.38359,0.37156,0.25752,0.2279,0.26838,0.22834,0.22029,0.21804,0.19969,0.22516,0.21907,0.22404,0.21474,0.2167,0.21545,0.22951,0.2287,0.21854,0.25418,0.1356,0.1319,0.1363,0.13095,0.12961,0.14331,0.13391,0.12944,0.14198,0.11969,0.14366,0.13258,0.13735,0.12194,0.14507,0.13617,0.13194,0.12977,0.39831,0.20005,0.19127,0.21272,0.21831,0.23455,0.21969,0.19688,0.22661,0.23972,0.21997,0.21242,0.21312,0.21232,0.23635,0.195,0.19059,0.20171,0.21249,0.13148,0.12973,0.12019,0.13799,0.13324,0.1307,0.13426,0.13101,0.12086,0.13551,0.12731,0.12975,0.13215,0.13711,0.12997,0.12159,0.13813,0.060452,0.21361,0.22137,0.19747,0.2187,0.21696,0.22753,0.19309,0.22629,0.21529,0.20772,0.21623,0.20796,0.21001,0.21457,0.19557,0.20809,0.24304,0.21109,0.20848,0.12188,0.131,0.1308,0.12425,0.13151,0.13379,0.12762,0.13091,0.13003,0.12921,0.13122,0.11731,0.12844,0.13254,0.12557,0.12071,0.13096,0.062067,0.21647,0.2087,0.20729,0.13965,0.21863,0.22086,0.214,0.23221,0.23293,0.22133,0.22689,0.21851,0.2012,0.20965,0.19646,0.21257,0.20204,0.21842,0.12855,0.12954,0.12676,0.13016,0.13416,0.1332,0.13009,0.13951,0.12481,0.11636,0.10669,0.13118,0.12443,0.13116,0.11827,0.11841,0.12695,0.13772,0.062084,0.22947,0.21669,0.20638,0.18184,0.22511,0.22202,0.21228,0.21919,0.18497,0.21229,0.2373,0.20793,0.19988,0.19332,0.22728,0.2164,0.18912,0.2412,0.13515,0.13361,0.13243,0.12929,0.13599,0.13665,0.1377,0.12582,0.13018,0.13989,0.10938,0.13351,0.11374,0.13517,0.13182,0.12084,0.13213,0.061781,0.062251,0.062665,0.21272,0.2656,0.20031,0.20465,0.18932,0.19709,0.18708,0.18733,0.20905,0.24405,0.19963,0.22541,0.2195,0.21029,0.205,0.1412,0.13167,0



.13321,0.12935,0.1147,0.13976,0.13063,0.13753,0.1271,0.1351,0.1278,0.12957,0.13116,0.14319,0.14131,0.1315,0.13823,0.1298,0.061181,0.060922,0.060973,0.061468,0.22438,0.22921,0.2238,0.10999,0.20817,0.23558,0.18338,0.24324,0.19536,0.1946,0.21193,0.20519,0.14094,0.11715,0.12413,0.1316,0.13063,0.14508,0.12799,0.12439,0.13282,0.1304,0.14712,0.1373,0.13143,0.13209,0.11749,0.13321,0.13127,0.13313,0.14125,0.13438,0.059718,0.061356,0.061297,0.061198,0.061262,0.062585,0.20929,0.21294,0.18557,0.16615,0.2139,0.22988,0.21514,0.18293,0.1372,0.11451,0.13861,0.13447,0.1299,0.15289,0.13103,0.12379,0.13446,0.13208,0.12836,0.13101,0.13131,0.12323,0.13123,0.13367,0.12485,0.13164,0.15788,0.13029,0.13337,0.13122,0.1369,0.061155,0.059898,0.060768,0.06138,0.061444,0.060989,0.22056,0.24288,0.15488,0.20966,0.21771,0.062165,0.061097,0.13283,0.12155,0.14878,0.13062,0.13441,0.13223,0.12969,0.13649,0.13402,0.13088,0.12983,0.13372,0.11266,0.11877,0.13312,0.14982,0.143,0.14019,0.12962,0.13673,0.12213,0.060458,0.059487,0.062638,0.061899,0.060867,0.060171,0.062019,0.061613,0.060959,0.062098,0.20735,0.2332,0.060445,0.061762,0.062702,0.060651,0.12722,0.13416,0.13563,0.15269,0.12694,0.12565,0.13781,0.136,0.11976,0.13205,0.11147,0.13975,0.13405,0.13042,0.14829,0.12937,0.12984,0.12974,0.1304,0.061619,0.06209,0.061088,0.061784,0.062668,0.060345,0.061236,0.06097,0.061671,0.062407,0.062108,0.061537,0.06151,0.062423,0.059973,0.060695,0.060296,0.13407,0.13065,0.13327,0.14098,0.12189,0.13156,0.15668,0.13023,0.13364,0.12235,0.13462,0.13099,0.12301,0.13452,0.12737,0.12942,0.062269,0.06141,0.060775,0.06024,0.060796,0.060414,0.061927,0.063019,0.060801,0.060798,0.062001,0.060062,0.061093,0.063292,0.062216,0.060527,0.060646,0.061488,0.062081,0.11363,0.1312,0.12987,0.13525,0.1354,0.13041,0.13829,0.12784,0.13045,0.12386,0.13157,0.12538,0.13229,0.060867,0.060719,0.062255,0.060801,0.061679,0.060037,0.062355,0.062181,0.063462,0.061331,0.061282,0.060712,0.060381,0.059761,0.060556,0.060349,0.061632,0.06022,0.061193,0.061345,0.06132,0.1393,0.12529,0.1298,0.12957,0.12101,0.13984,0.14818,0.14094,0.1311,0.061938,0.06009,0.061259,0.062056,0.061651,0.062358,0.061571,0.061847,0.060345,0.060605,0.060994,0.060498,0.060899,0.061717,0.060616,0.06176,0.061172,0.060742,0.06141,0.060373,0.063573,0.061915,0.060604,0.061149,0.061991,0.12431,0.13187,0.11294,0.12305,0.061455,0.060809,0.062154,0.061369,0.062331,0.061666,0.061257,0.06158,0.05999,0.062202,0.062241,0.061067,0.06049,0.060882,0.061071,0.059355,0.062902,0.061538,0.058994,0.060123,0.061531,0.060791,0.061211,0.061871,0.060729,0.060985,0.059812,0.061231,0.062364,0.060917,0.061328,0.061557,0.061993,0.059874,0.061954,0.060669,0.061091,0.061735,0.060575,0.062182,0.061573,0.061818,0.062012,0.062174,0.063265,0.062846,0.060305,0.060714,0.060633,0.062472,0.062645,0.060825,0.060452,0.061217,0.059935,0.060665,0.061795,0.06007,0.061975,0.061655,0.060625,0.059861,0.06043,0.060897,0.062065,0.061754,0.060903,0.060072,0.060067,0.062163,0.06281,0.059563,0.061475,0.061132,0.061336,0.061886,0.062023,0.063241,0.062931,0.061341,0.061462,0.061944,0.060955,0.061156,0.059784,0.060666,0.06258,0.060813,0.059776,0.060804,0.062602,0.06126,0.060266,0.060982,0.062238,0.061382,0.060209,0.061137,0.060078,0.061152,0.061568,0.060685,0.062217,0.062885,0.061912,0.062229,0.062294,0.062208,0.062942,0.061885,0.061931,0.061749,0.063312,0.060278,0.063031,0.060631,0.059676,0.060875,0.061522,0.061824,0.060715,0.061126,0.061319,0.061098,0.062449,0.062786,0.062626,0.061729,0.061112,0.060123,0.061582,0.062056,0.059957,0.061803,0.061033,0.061474,0.060184,0.061411,0.062734,0.061241,0.06241,0.061384,0.060023,0.060117,0.062907,0.061264,0.0

60204,0.062126,0.06078,0.061576,0.060308,0.062049,0.061817,0.061623,0.060198,0.061903,0.060656,0.062,0.06185,0.059877,0.06169,0.060886,0.061039,0.061079,0.061944,0.061445,0.062083,0.06258,0.062632,0.061852,0.063837,0.060786,0.061391,0.061733,0.061658,0.061899,0.061233,0.059965,0.060591,0.062494,0.062305,0.060614,0.062506,0.061094,0.061094,0.060398,0.060966,0.061309,0.061067,0.060556,0.06228,0.061954,0.062548,0.061051,0.061386  
0.20079,0.19898,0.20623,0.20341,0.20254,0.20158,0.20539,0.20254,0.20176,0.20266,0.2042,0.20098,0.20441,0.20133,0.2044,0.19941,0.20024,0.20229,0.20299,0.20187,0.27539,0.2958,0.27059,0.29877,0.19901,0.20094,0.20102,0.20264,0.20323,0.20229,0.20412,0.2031,0.20187,0.20017,0.20055,0.20322,0.20439,0.20066,0.20122,0.36987,0.27538,0.2741,0.28009,0.28857,0.28015,0.30686,0.2031,0.20509,0.1986,0.20409,0.20289,0.20219,0.1992,0.20121,0.2028,0.20171,0.2002,0.2019,0.20077,0.20411,0.20236,0.35348,0.3694,0.30098,0.28753,0.27885,0.2756,0.26866,0.26905,0.28486,0.30114,0.20253,0.20397,0.20246,0.19829,0.20255,0.20149,0.204,0.20206,0.20167,0.20245,0.20149,0.20355,0.20116,0.20365,0.20338,0.39848,0.33973,0.36781,0.30365,0.28002,0.26204,0.29421,0.28461,0.29519,0.27415,0.28499,0.28588,0.20112,0.20316,0.20225,0.20278,0.202,0.2016,0.20103,0.20343,0.20202,0.20169,0.20089,0.20001,0.20468,0.2042,0.20091,0.20257,0.34927,0.32151,0.37225,0.37402,0.27302,0.28616,0.27905,0.28183,0.29289,0.29404,0.27818,0.27361,0.29543,0.26828,0.20171,0.20054,0.20067,0.20341,0.20254,0.20121,0.20502,0.20157,0.20029,0.20369,0.20667,0.20552,0.20216,0.20271,0.20277,0.20241,0.34906,0.37093,0.33821,0.33165,0.39203,0.39231,0.27939,0.29952,0.29701,0.27792,0.28257,0.28979,0.28051,0.29177,0.27505,0.28534,0.20188,0.20024,0.20318,0.20122,0.20268,0.20213,0.1984,0.20288,0.20265,0.20366,0.20342,0.20504,0.20723,0.20222,0.20162,0.20151,0.20109,0.34014,0.38223,0.3732,0.34194,0.36263,0.35886,0.29621,0.33528,0.27627,0.27172,0.25474,0.3043,0.26983,0.30323,0.28716,0.29933,0.3139,0.2013,0.20225,0.20599,0.20369,0.20249,0.20429,0.20233,0.20414,0.20165,0.20109,0.20119,0.19953,0.20096,0.13031,0.13507,0.13724,0.20428,0.37491,0.36914,0.33885,0.38659,0.36404,0.36474,0.38162,0.28562,0.27698,0.28547,0.29758,0.28839,0.27517,0.27526,0.26068,0.30491,0.27476,0.25832,0.20458,0.20301,0.20139,0.1996,0.19908,0.19941,0.20185,0.20072,0.20164,0.20388,0.20045,0.12038,0.13828,0.12949,0.11517,0.1216,0.12993,0.20148,0.37848,0.37693,0.35985,0.37243,0.35924,0.35263,0.38102,0.29098,0.27262,0.28569,0.25437,0.29116,0.29762,0.2697,0.30045,0.27037,0.28214,0.27075,0.20461,0.20312,0.19907,0.20363,0.20427,0.19996,0.20325,0.20515,0.20149,0.12177,0.12489,0.12503,0.12783,0.12577,0.11469,0.13116,0.13337,0.12868,0.20244,0.35871,0.36353,0.34838,0.38008,0.35334,0.34365,0.3335,0.28287,0.28939,0.28008,0.26305,0.28697,0.27785,0.26077,0.32081,0.27061,0.28617,0.28316,0.28088,0.2029,0.20276,0.20045,0.20259,0.20313,0.20041,0.124,0.12757,0.13133,0.13701,0.13978,0.13123,0.13029,0.13781,0.1315,0.15331,0.12636,0.12867,0.37684,0.3817,0.35128,0.37493,0.37467,0.4111,0.36814,0.29389,0.28518,0.28062,0.26593,0.29931,0.29101,0.27702,0.27942,0.26384,0.29079,0.2751,0.31495,0.20167,0.20229,0.20159,0.13098,0.13151,0.13063,0.12993,0.13518,0.12938,0.15131,0.13141,0.14625,0.1252,0.1259,0.13747,0.13306,0.12705,0.14188,0.35614,0.34545,0.3729,0.33995,0.35886,0.3911,0.37913,0.38452,0.37839,0.27887,0.28079,0.28562,0.27217,0.28521,0.2835,0.26762,0.29775,0.29121,0.2762,0.2828,0.13626,0.13843,0.13037,0.13843,0.12069,0.1339,0.13221,0.12226,0.13283,0.13785,0.12939,0.12112,0.15465,0.12811,0.1371,0.12452,0.13141,0.1258,0.37436,0.34587,0.38552,0.3

4914,0.3778,0.37236,0.38253,0.3706,0.33732,0.27825,0.27845,0.17591,0.2  
0257,0.23346,0.19393,0.22199,0.21679,0.20576,0.21953,0.20137,0.12282,0  
.14103,0.11437,0.12655,0.13038,0.13107,0.10855,0.1278,0.13137,0.13188,  
0.1337,0.13493,0.12513,0.12966,0.1305,0.12195,0.14913,0.13906,0.35289,  
0.35509,0.3675,0.36822,0.36312,0.35995,0.34548,0.3579,0.35139,0.20982,  
0.21482,0.20932,0.22646,0.2116,0.20746,0.20772,0.22095,0.20658,0.2142,  
0.21187,0.13918,0.12451,0.13223,0.12696,0.1344,0.13731,0.14514,0.13121  
,0.12605,0.11694,0.12996,0.13796,0.1247,0.13281,0.13506,0.12866,0.1248  
7,0.13237,0.36683,0.38186,0.36194,0.38512,0.39588,0.37681,0.38423,0.19  
971,0.18635,0.22167,0.21471,0.21729,0.21141,0.20197,0.20652,0.20177,0.  
21677,0.20122,0.18512,0.20042,0.11933,0.13239,0.12957,0.13311,0.13741,  
0.12815,0.09123,0.13194,0.14134,0.13183,0.13006,0.12192,0.12906,0.1242  
3,0.13859,0.13077,0.1296,0.1252,0.36675,0.36023,0.38692,0.36965,0.3437  
,0.37268,0.19563,0.22384,0.22666,0.19865,0.21286,0.20787,0.21596,0.206  
32,0.20898,0.21821,0.1859,0.21166,0.22008,0.21281,0.14832,0.13044,0.13  
,0.12223,0.12136,0.13609,0.13712,0.12386,0.13073,0.13015,0.1295,0.1306  
3,0.12824,0.13253,0.12999,0.13618,0.14964,0.1417,0.33552,0.37268,0.366  
24,0.37734,0.37374,0.18122,0.20529,0.21254,0.22725,0.21537,0.19871,0.2  
0608,0.19486,0.218,0.20275,0.19484,0.19576,0.20917,0.20695,0.21894,0.1  
3376,0.1313,0.12549,0.12274,0.13012,0.12963,0.1425,0.11933,0.14199,0.1  
3173,0.12951,0.13156,0.12611,0.13149,0.13106,0.13049,0.13347,0.1359,0.  
35318,0.37601,0.36949,0.2476,0.22073,0.26789,0.22041,0.21904,0.21753,0  
.19306,0.22665,0.22145,0.22092,0.20927,0.21631,0.21134,0.22892,0.22884  
,0.21469,0.25087,0.13501,0.13131,0.13562,0.13005,0.12837,0.14353,0.133  
53,0.1287,0.14075,0.11794,0.14328,0.13197,0.13716,0.1204,0.14481,0.134  
86,0.13145,0.12951,0.39331,0.19746,0.1872,0.20521,0.22013,0.22376,0.21  
872,0.19544,0.21416,0.24641,0.21809,0.20719,0.21234,0.20822,0.23434,0.  
19606,0.1913,0.20278,0.2106,0.13113,0.12928,0.11836,0.13751,0.13215,0.  
13031,0.13306,0.13011,0.12037,0.13473,0.12589,0.12875,0.13148,0.13617,  
0.13002,0.12076,0.13809,0.057351,0.20749,0.22296,0.1928,0.21807,0.2172  
4,0.22229,0.1907,0.21754,0.20888,0.20658,0.21058,0.20449,0.20566,0.211  
87,0.19304,0.21042,0.24199,0.20815,0.20693,0.12131,0.13158,0.13055,0.1  
229,0.13078,0.13222,0.1268,0.13009,0.12901,0.12849,0.12997,0.11646,0.1  
2739,0.1325,0.12446,0.12023,0.13024,0.059694,0.20948,0.20781,0.19925,0  
.13882,0.2153,0.21744,0.21025,0.22421,0.23327,0.22014,0.22691,0.21433,  
0.20254,0.21344,0.19877,0.20709,0.2021,0.21926,0.12825,0.12946,0.12671  
,0.13042,0.13326,0.13231,0.12924,0.13987,0.12416,0.11541,0.10559,0.130  
75,0.12368,0.13116,0.1171,0.11818,0.12556,0.1374,0.059742,0.23067,0.21  
928,0.20001,0.1821,0.21986,0.21897,0.21312,0.22049,0.17507,0.20606,0.2  
3999,0.21058,0.20214,0.18864,0.22554,0.21128,0.18455,0.24201,0.13499,0  
.13282,0.13141,0.12812,0.13577,0.13668,0.13706,0.12629,0.12861,0.13997  
,0.1089,0.13354,0.1122,0.13525,0.13028,0.11933,0.13123,0.059316,0.0598  
77,0.060041,0.20733,0.26245,0.19802,0.20594,0.18654,0.1943,0.17943,0.1  
874,0.20921,0.24068,0.19524,0.22521,0.21673,0.20817,0.20132,0.13978,0.  
13002,0.13224,0.12894,0.11342,0.13906,0.13147,0.1372,0.12642,0.1345,0.  
1273,0.12792,0.13106,0.14265,0.14009,0.1305,0.13729,0.12845,0.05874,0.  
058376,0.058618,0.058504,0.22045,0.21822,0.22143,0.10844,0.20083,0.236  
03,0.17314,0.23484,0.19326,0.19693,0.20657,0.20189,0.14039,0.11631,0.1  
2326,0.13034,0.12897,0.14548,0.12781,0.12362,0.13136,0.12889,0.14687,0  
.1367,0.13021,0.13173,0.11643,0.13249,0.13042,0.13319,0.13971,0.13351,  
0.057146,0.059064,0.057961,0.05896,0.058564,0.059342,0.20212,0.20797,0  
.18804,0.16305,0.20996,0.22352,0.20938,0.18089,0.13631,0.11314,0.1385,

0.13397,0.12935,0.15225,0.1303,0.12283,0.13405,0.13164,0.12789,0.13086  
,0.13068,0.12223,0.12984,0.13333,0.12448,0.13126,0.15875,0.12976,0.133  
49,0.12992,0.13581,0.058877,0.057659,0.057958,0.059062,0.059143,0.0584  
59,0.21684,0.24965,0.14691,0.20503,0.21715,0.059899,0.058863,0.13404,0  
.12038,0.14826,0.13059,0.13392,0.13155,0.12894,0.13624,0.13311,0.13025  
,0.12875,0.13301,0.11152,0.1183,0.13247,0.14956,0.1423,0.13967,0.12866  
,0.13603,0.12105,0.058282,0.056755,0.060343,0.058564,0.058857,0.057212  
,0.059737,0.059459,0.058461,0.059743,0.19858,0.22401,0.057895,0.05961,  
0.060226,0.058405,0.12783,0.13324,0.13557,0.15235,0.12574,0.12444,0.13  
714,0.13588,0.11848,0.13123,0.10983,0.13974,0.13285,0.1298,0.14737,0.1  
2975,0.12927,0.12854,0.12999,0.058702,0.059659,0.058556,0.059239,0.060  
338,0.057722,0.058582,0.058065,0.059514,0.059483,0.058974,0.059268,0.0  
58405,0.060371,0.057691,0.058326,0.058027,0.1331,0.13004,0.13295,0.140  
58,0.12154,0.13126,0.15657,0.12918,0.13209,0.12323,0.13486,0.13052,0.1  
2191,0.13426,0.1266,0.12842,0.059671,0.057977,0.057659,0.058081,0.0582  
34,0.057797,0.059729,0.060748,0.058703,0.058075,0.059376,0.057664,0.05  
8297,0.059701,0.05979,0.057863,0.058156,0.058751,0.059076,0.11275,0.13  
041,0.12933,0.13443,0.13507,0.12994,0.13749,0.12678,0.12971,0.12282,0.  
13151,0.12447,0.13098,0.058484,0.058972,0.059634,0.058056,0.059465,0.0  
57328,0.060767,0.059646,0.060774,0.058688,0.058133,0.058972,0.057606,0  
.056948,0.057799,0.057681,0.059237,0.057707,0.058871,0.059311,0.058858  
,0.13835,0.12536,0.12937,0.12844,0.12041,0.14077,0.14722,0.1403,0.1309  
3,0.059484,0.057302,0.059079,0.059427,0.058819,0.059489,0.05873,0.0591  
18,0.057282,0.057543,0.058847,0.05822,0.058744,0.059039,0.05809,0.0590  
76,0.058094,0.058022,0.059474,0.0581,0.061211,0.059433,0.058013,0.0579  
06,0.059401,0.12415,0.13157,0.1108,0.12237,0.058297,0.057833,0.059153,  
0.058161,0.05949,0.059023,0.058267,0.058457,0.058039,0.059966,0.059561  
,0.059359,0.058446,0.057733,0.057973,0.05615,0.060523,0.058561,0.05655  
,0.058742,0.059459,0.058169,0.059072,0.059113,0.057627,0.059128,0.0572  
82,0.058168,0.059997,0.058431,0.058999,0.059514,0.05928,0.057821,0.059  
508,0.058566,0.057896,0.059479,0.057055,0.059218,0.059055,0.058964,0.0  
59547,0.059328,0.06104,0.0605,0.05792,0.057702,0.058127,0.059416,0.059  
976,0.058019,0.057325,0.059077,0.058178,0.058376,0.05934,0.057736,0.05  
942,0.058921,0.057969,0.057567,0.057839,0.058292,0.05981,0.059439,0.05  
7944,0.057359,0.057281,0.059798,0.060296,0.057105,0.058414,0.058471,0.  
057866,0.059525,0.059063,0.059759,0.060694,0.058974,0.059086,0.0591,0.  
058642,0.058407,0.05806,0.058268,0.059944,0.058017,0.05778,0.058474,0.  
05984,0.058985,0.05822,0.057947,0.060039,0.058515,0.057966,0.059238,0.  
057434,0.057969,0.059343,0.058066,0.059335,0.059715,0.05931,0.05966,0.  
059511,0.059786,0.060416,0.058723,0.059032,0.058956,0.06068,0.057821,0  
.06095,0.058546,0.057515,0.058004,0.058343,0.059202,0.058622,0.059033,  
0.0585,0.059047,0.059617,0.059998,0.059708,0.059229,0.058816,0.057223,  
0.059162,0.058855,0.057595,0.059948,0.058338,0.059082,0.057515,0.05901  
,0.059472,0.058885,0.060246,0.058634,0.057489,0.058691,0.060393,0.0586  
09,0.058053,0.059425,0.057755,0.05866,0.057715,0.059441,0.059006,0.059  
637,0.057795,0.058899,0.058191,0.058708,0.059157,0.05781,0.058837,0.05  
8603,0.058961,0.058498,0.059776,0.058964,0.05947,0.0595,0.05914,0.0592  
32,0.060574,0.058176,0.059841,0.058731,0.05931,0.059019,0.058334,0.056  
459,0.057291,0.060036,0.059068,0.058212,0.059639,0.05815,0.058679,0.05  
7656,0.058085,0.05895,0.057675,0.058196,0.059508,0.05926,0.06026,0.058  
696,0.058619

0.20306,0.20155,0.20676,0.20487,0.20344,0.2026,0.20562,0.20384,0.2017,  
0.20269,0.20482,0.20237,0.20527,0.20289,0.20452,0.20117,0.20119,0.2034  
,0.20465,0.20185,0.27819,0.29575,0.27099,0.29999,0.19907,0.20188,0.202  
03,0.20377,0.20464,0.20319,0.20519,0.20367,0.203,0.20155,0.20089,0.204  
75,0.20596,0.20227,0.20282,0.36464,0.27267,0.27486,0.26876,0.28384,0.2  
8227,0.3056,0.20412,0.20612,0.19883,0.20447,0.20345,0.2026,0.20019,0.2  
011,0.20431,0.2034,0.20218,0.20204,0.2019,0.20342,0.20308,0.35491,0.35  
862,0.2973,0.27998,0.28261,0.27886,0.26905,0.26902,0.27286,0.30939,0.2  
0278,0.20524,0.20449,0.19917,0.20297,0.20131,0.20604,0.20306,0.20314,0  
.20354,0.20167,0.20513,0.20099,0.20426,0.20363,0.40389,0.33789,0.37844  
,0.30699,0.27536,0.26669,0.29129,0.27898,0.29162,0.27804,0.28724,0.283  
33,0.20208,0.20339,0.20222,0.20383,0.20345,0.20284,0.20156,0.20426,0.2  
0162,0.20168,0.20232,0.20121,0.20497,0.20601,0.20205,0.20379,0.33727,0  
.31952,0.36405,0.37494,0.26559,0.28362,0.2796,0.28351,0.29381,0.2993,0  
.27413,0.27051,0.29261,0.27117,0.20273,0.20325,0.20136,0.20466,0.2026,  
0.20188,0.20571,0.20258,0.20165,0.20521,0.20663,0.20629,0.20263,0.2033  
9,0.20413,0.20346,0.35179,0.37216,0.33249,0.32555,0.37476,0.39334,0.28  
031,0.29147,0.29812,0.27645,0.27871,0.287,0.28585,0.29306,0.27627,0.28  
739,0.20299,0.20158,0.20331,0.20291,0.20432,0.20384,0.20132,0.2037,0.2  
0364,0.20505,0.20485,0.20504,0.20681,0.20198,0.20198,0.20296,0.20143,0  
.3322,0.38425,0.3638,0.3343,0.34814,0.36063,0.29587,0.33602,0.28153,0.  
26816,0.25598,0.30143,0.27186,0.29822,0.28691,0.2916,0.30788,0.20273,0  
.20298,0.20597,0.20396,0.20284,0.2044,0.20282,0.20501,0.20146,0.20187,  
0.20078,0.19974,0.20137,0.12959,0.13449,0.13742,0.2055,0.37164,0.35438  
,0.34143,0.36362,0.35883,0.365,0.37284,0.28529,0.27617,0.2845,0.29833,  
0.28413,0.27835,0.27705,0.25715,0.29796,0.27083,0.25957,0.20501,0.2046  
1,0.20392,0.20088,0.20118,0.20074,0.20367,0.20206,0.20227,0.20552,0.20  
259,0.11948,0.13667,0.12911,0.11444,0.12052,0.12997,0.20315,0.38111,0.  
36988,0.35675,0.36005,0.35882,0.35048,0.39585,0.2907,0.27381,0.28898,0  
.25195,0.29414,0.2944,0.26897,0.30096,0.27417,0.28383,0.26954,0.2048,0  
.20295,0.20014,0.20405,0.20468,0.20056,0.20432,0.20699,0.20212,0.12153  
,0.12447,0.12509,0.12698,0.12526,0.11349,0.13125,0.13305,0.12841,0.202  
37,0.36986,0.37004,0.34331,0.38345,0.35853,0.32793,0.34199,0.2845,0.29  
173,0.28212,0.25499,0.28155,0.27804,0.25948,0.31355,0.27395,0.28532,0.  
27829,0.27247,0.20429,0.20418,0.20217,0.20297,0.20529,0.20133,0.12332,  
0.12761,0.13106,0.13604,0.1391,0.13066,0.1306,0.13846,0.13069,0.15275,  
0.12572,0.12887,0.37429,0.38178,0.34779,0.36049,0.38353,0.40295,0.3655  
9,0.29191,0.28337,0.28549,0.2688,0.29908,0.28785,0.2819,0.28006,0.2628  
,0.29645,0.27581,0.30177,0.20161,0.20318,0.20259,0.13092,0.13189,0.129  
56,0.1288,0.13432,0.12973,0.15098,0.1306,0.14652,0.12391,0.12584,0.136  
43,0.13289,0.12626,0.14171,0.35379,0.33207,0.37503,0.32886,0.34618,0.3  
8035,0.37952,0.37663,0.37443,0.27711,0.27301,0.28499,0.27701,0.28402,0  
.28279,0.26414,0.29695,0.28655,0.27532,0.28348,0.13644,0.13795,0.12869  
,0.13767,0.12014,0.13385,0.13176,0.12067,0.13221,0.13703,0.12939,0.119  
81,0.15411,0.12794,0.13633,0.12393,0.13079,0.12511,0.37566,0.34301,0.3  
8815,0.34319,0.36762,0.3748,0.37168,0.37167,0.33605,0.27633,0.27325,0.  
17388,0.20223,0.2307,0.19565,0.21733,0.21757,0.20017,0.21921,0.20531,0  
.12175,0.1396,0.11349,0.12628,0.1291,0.13032,0.10806,0.12666,0.13071,0  
.13187,0.13258,0.13509,0.12416,0.1284,0.12967,0.12194,0.14906,0.13892,  
0.34155,0.34989,0.36884,0.37071,0.34787,0.36178,0.33712,0.35387,0.3593  
9,0.20734,0.21567,0.20871,0.2239,0.20658,0.20407,0.20729,0.22087,0.207  
55,0.21435,0.20947,0.13816,0.12411,0.13188,0.12661,0.13347,0.13776,0.1

4434,0.13075,0.12626,0.11527,0.12929,0.13736,0.12384,0.13244,0.13382,0.12785,0.1247,0.13183,0.36554,0.37891,0.35273,0.38973,0.39326,0.38045,0.38323,0.19601,0.18641,0.21728,0.21617,0.21442,0.20814,0.20344,0.20095,0.20024,0.21833,0.20236,0.18338,0.19971,0.11895,0.13072,0.12929,0.13267,0.13804,0.12787,0.089289,0.13117,0.14031,0.13084,0.12991,0.12097,0.12911,0.12286,0.13838,0.13043,0.1291,0.12424,0.37321,0.35664,0.37063,0.35271,0.35461,0.37379,0.19526,0.21968,0.22381,0.19648,0.21256,0.20386,0.21598,0.20567,0.21018,0.21664,0.18814,0.21197,0.21852,0.21482,0.14869,0.12932,0.13015,0.12195,0.12046,0.13522,0.13654,0.12342,0.13003,0.12918,0.12855,0.13029,0.12752,0.13168,0.12931,0.1367,0.14925,0.14079,0.32641,0.37428,0.36272,0.3609,0.36341,0.176,0.20865,0.20438,0.22258,0.21602,0.19551,0.20874,0.19603,0.21743,0.20389,0.19376,0.19306,0.21046,0.2059,0.21756,0.13328,0.13086,0.12479,0.12125,0.12903,0.12986,0.14155,0.11846,0.14165,0.13186,0.12922,0.13133,0.12501,0.13083,0.13028,0.12961,0.13357,0.13605,0.34436,0.3701,0.35934,0.24796,0.22065,0.26294,0.2181,0.21764,0.21441,0.18656,0.21998,0.21664,0.21801,0.20973,0.21263,0.20662,0.23003,0.22714,0.21295,0.24612,0.13467,0.12985,0.13462,0.12911,0.12743,0.14406,0.13213,0.12791,0.14005,0.11763,0.14287,0.13092,0.13614,0.11919,0.14518,0.13384,0.13057,0.12939,0.37899,0.1961,0.18582,0.20735,0.22614,0.22262,0.21277,0.18834,0.20809,0.24032,0.21627,0.20635,0.2122,0.20534,0.2296,0.19308,0.1906,0.20456,0.2074,0.13071,0.1283,0.1174,0.13709,0.13091,0.13059,0.13425,0.12885,0.12054,0.13416,0.12503,0.12769,0.1307,0.13704,0.13024,0.12013,0.1373,0.055264,0.21027,0.21441,0.18895,0.21212,0.21289,0.21999,0.18904,0.21561,0.20303,0.20743,0.20862,0.20493,0.20573,0.20666,0.19055,0.21076,0.24567,0.20821,0.2079,0.12162,0.13111,0.1305,0.12177,0.12982,0.13179,0.12648,0.12978,0.12846,0.12815,0.12962,0.11516,0.12766,0.13137,0.12334,0.11887,0.13025,0.057033,0.20513,0.20863,0.19325,0.13892,0.21706,0.21451,0.21316,0.22747,0.23229,0.21582,0.22543,0.21363,0.20074,0.21133,0.19821,0.20705,0.20124,0.21477,0.12774,0.12845,0.12621,0.12983,0.13259,0.132,0.12781,0.13992,0.12335,0.11408,0.10442,0.12997,0.12318,0.13063,0.11669,0.1174,0.12511,0.13716,0.056527,0.22624,0.2181,0.20537,0.18414,0.21842,0.21835,0.20919,0.21739,0.17301,0.20806,0.23816,0.20706,0.20194,0.18959,0.22297,0.20817,0.18677,0.24063,0.13467,0.13194,0.131,0.12633,0.1353,0.13619,0.13694,0.12537,0.12784,0.13996,0.10783,0.13284,0.11132,0.13507,0.12917,0.11791,0.13052,0.057406,0.057796,0.058354,0.20548,0.25571,0.20115,0.20414,0.18568,0.19086,0.17174,0.18226,0.21021,0.24311,0.19092,0.23028,0.2132,0.20305,0.20421,0.13999,0.12995,0.13178,0.1281,0.11202,0.13844,0.13089,0.13685,0.12584,0.13435,0.1279,0.12759,0.12977,0.14195,0.13951,0.12998,0.13686,0.12721,0.056297,0.05635,0.056476,0.056564,0.22011,0.21385,0.21805,0.10609,0.19353,0.23639,0.1719,0.23154,0.19208,0.20148,0.20828,0.20343,0.14008,0.1152,0.12307,0.12944,0.12894,0.14438,0.12699,0.12368,0.13086,0.12809,0.14617,0.13675,0.12902,0.13158,0.1163,0.13228,0.12966,0.13256,0.13914,0.1325,0.05534,0.057002,0.05646,0.056751,0.055927,0.05659,0.20169,0.20279,0.18771,0.15606,0.21571,0.22332,0.20325,0.17711,0.13547,0.11245,0.138,0.1337,0.12796,0.15264,0.13033,0.12149,0.13441,0.13111,0.12743,0.12981,0.13086,0.1214,0.12844,0.1321,0.12388,0.13011,0.15829,0.12891,0.13221,0.13011,0.13509,0.056998,0.056249,0.055675,0.056904,0.057787,0.05611,0.20962,0.23987,0.14579,0.20076,0.21437,0.056768,0.057032,0.13383,0.11978,0.14891,0.12997,0.13317,0.13186,0.12866,0.13622,0.13268,0.12974,0.12865,0.13154,0.11066,0.11769,0.13178,0.14931,0.14224,0.13888,0.12749,0.13538,0.11948,0.055795,0.054311,0.058248,0.056402,0.

05609,0.055301,0.057635,0.057328,0.056561,0.057288,0.19761,0.22157,0.055774,0.057241,0.058812,0.055605,0.12711,0.13278,0.13608,0.15284,0.12541,0.12404,0.13759,0.13534,0.1173,0.13142,0.10887,0.13916,0.13209,0.12931,0.14686,0.12902,0.12855,0.12888,0.12949,0.056498,0.057773,0.05675,0.057327,0.058202,0.055745,0.056975,0.057055,0.057725,0.057691,0.057163,0.057102,0.057162,0.058416,0.055478,0.056679,0.05578,0.13292,0.1296,0.13276,0.13962,0.12121,0.13057,0.15573,0.12949,0.13116,0.12305,0.13493,0.12945,0.12157,0.13314,0.12615,0.12722,0.057523,0.055498,0.056861,0.055436,0.056559,0.055585,0.057735,0.058439,0.056157,0.055098,0.056898,0.055869,0.056442,0.057529,0.057001,0.055981,0.056012,0.056759,0.057161,0.11113,0.12956,0.129,0.13385,0.13471,0.12926,0.13716,0.12608,0.12934,0.12158,0.13154,0.12443,0.13017,0.056321,0.055954,0.057181,0.056609,0.056796,0.056468,0.058848,0.057159,0.058335,0.056329,0.055919,0.056703,0.055607,0.055376,0.055211,0.05583,0.056993,0.056214,0.056786,0.056987,0.057088,0.1379,0.12436,0.1281,0.12745,0.11986,0.14078,0.14735,0.13948,0.12986,0.057424,0.055068,0.056381,0.057288,0.057077,0.057728,0.05657,0.056632,0.055812,0.056322,0.05649,0.056315,0.056277,0.057483,0.056208,0.056283,0.055605,0.056118,0.057798,0.056262,0.058739,0.057073,0.056326,0.055693,0.057179,0.12332,0.13122,0.11013,0.12184,0.056256,0.055686,0.056729,0.055975,0.057436,0.056281,0.056157,0.056199,0.056244,0.057527,0.057487,0.057263,0.056284,0.055217,0.056143,0.055167,0.058455,0.056619,0.054361,0.057186,0.056522,0.056407,0.056767,0.05658,0.055185,0.056678,0.055848,0.056694,0.057538,0.055574,0.056783,0.057012,0.057315,0.056273,0.058086,0.056922,0.05583,0.057378,0.054393,0.057103,0.057202,0.058102,0.057849,0.056852,0.058206,0.058281,0.056117,0.055799,0.056515,0.057511,0.057417,0.056135,0.056152,0.057166,0.055279,0.056099,0.057238,0.056105,0.056758,0.057362,0.056409,0.055607,0.055342,0.056601,0.056729,0.056978,0.055535,0.055545,0.055467,0.057708,0.057895,0.054969,0.056204,0.056163,0.055947,0.056915,0.056386,0.05802,0.058783,0.056672,0.056104,0.057059,0.056375,0.055691,0.055975,0.056781,0.058676,0.05657,0.056938,0.056099,0.056912,0.057378,0.056719,0.055734,0.05729,0.056319,0.055417,0.057157,0.055525,0.056186,0.057297,0.056255,0.057838,0.057376,0.057199,0.057181,0.056664,0.057326,0.05749,0.056955,0.057005,0.057045,0.059019,0.055757,0.058248,0.056143,0.055928,0.055865,0.056453,0.056773,0.057096,0.057091,0.057548,0.057308,0.057248,0.057892,0.05733,0.057407,0.056612,0.055716,0.057049,0.056422,0.05594,0.058426,0.056217,0.056428,0.054378,0.057062,0.057152,0.056728,0.058054,0.056541,0.055833,0.056206,0.058297,0.05646,0.056252,0.057661,0.05519,0.057147,0.056266,0.057186,0.056272,0.057219,0.056045,0.0569,0.056966,0.056455,0.056699,0.055817,0.056557,0.056582,0.056336,0.056269,0.057245,0.057262,0.057076,0.05733,0.057947,0.056452,0.057881,0.056461,0.057438,0.05681,0.057246,0.056713,0.056333,0.054429,0.055059,0.057972,0.056158,0.056045,0.057846,0.055829,0.056343,0.055666,0.055804,0.057137,0.055263,0.055822,0.057444,0.057134,0.058336,0.056285,0.056617

0.20401,0.20273,0.2065,0.20517,0.20485,0.20396,0.20577,0.20581,0.20253,0.20263,0.20584,0.20248,0.20541,0.203,0.20434,0.20246,0.20297,0.2035,0.20656,0.20369,0.27722,0.29295,0.27406,0.29476,0.20136,0.20364,0.20222,0.20504,0.20599,0.20445,0.20588,0.20455,0.20485,0.20078,0.20231,0.20453,0.20531,0.20382,0.20372,0.36735,0.27453,0.27379,0.26863,0.28049,0.27564,0.30636,0.20434,0.20713,0.19826,0.20496,0.20378,0.20451,0.20225,0.20262,0.20573,0.2042,0.20248,0.20333,0.20295,0.20436,0.20423,0.36145,0.34168,0.28999,0.27458,0.2808,0.28946,0.2708,0.27448,0.27142,0.29632

,0.20449,0.20549,0.20536,0.20009,0.2043,0.20239,0.20787,0.20401,0.2049  
,0.20523,0.20268,0.20576,0.20297,0.20562,0.20367,0.40311,0.32925,0.376  
99,0.30336,0.2746,0.26485,0.28592,0.27478,0.28993,0.27132,0.28908,0.27  
734,0.20411,0.20417,0.20343,0.20471,0.20576,0.20262,0.20313,0.20394,0.  
20212,0.2024,0.20366,0.20099,0.20596,0.20708,0.20366,0.20548,0.34007,0.  
.31533,0.36238,0.36479,0.26843,0.28095,0.28182,0.28138,0.28759,0.29537  
,0.27777,0.26701,0.29036,0.27365,0.20275,0.20357,0.20257,0.20366,0.203  
73,0.20352,0.20591,0.20269,0.20183,0.20614,0.20683,0.20669,0.20458,0.2  
0483,0.20421,0.20299,0.35163,0.36744,0.34055,0.32786,0.37414,0.37973,0.  
.28127,0.28736,0.29908,0.26791,0.27529,0.2894,0.27719,0.29059,0.27825,  
0.28211,0.2035,0.20221,0.20324,0.20372,0.20497,0.20379,0.20142,0.20514  
,0.20456,0.20506,0.20553,0.20506,0.20795,0.20269,0.20307,0.2043,0.2023  
,0.34474,0.36757,0.36013,0.33867,0.34991,0.35998,0.29002,0.33213,0.276  
62,0.2719,0.25467,0.29497,0.26985,0.29177,0.28015,0.2943,0.30658,0.203  
13,0.20311,0.20654,0.20611,0.20363,0.20495,0.20347,0.20492,0.20269,0.2  
0317,0.20118,0.19997,0.20266,0.12914,0.13555,0.1384,0.206,0.36996,0.34  
95,0.34531,0.35362,0.3441,0.35317,0.38458,0.28543,0.2676,0.2816,0.2973  
1,0.28158,0.2804,0.28016,0.25808,0.28861,0.26795,0.25809,0.20651,0.206  
89,0.20491,0.20278,0.20256,0.20332,0.20326,0.20212,0.20302,0.20519,0.2  
0211,0.11893,0.13744,0.12862,0.11354,0.11969,0.12936,0.20446,0.37051,0.  
.36476,0.3527,0.36086,0.35564,0.3496,0.39129,0.28877,0.26637,0.29155,0.  
.25307,0.2903,0.28897,0.26636,0.30162,0.26975,0.27949,0.26956,0.20679,  
0.20393,0.20319,0.20496,0.20618,0.20106,0.2052,0.2065,0.20324,0.1215,0.  
.12489,0.12503,0.12681,0.12425,0.11238,0.13122,0.13245,0.12776,0.20213  
,0.35628,0.35633,0.33511,0.36658,0.36007,0.32123,0.36211,0.28816,0.286  
29,0.27004,0.25722,0.28611,0.27882,0.25725,0.31195,0.27537,0.2887,0.27  
901,0.26763,0.20605,0.20555,0.20281,0.20448,0.2071,0.20201,0.12262,0.1  
2718,0.13115,0.13524,0.13907,0.1304,0.12964,0.13738,0.13024,0.15269,0.  
12514,0.12795,0.36266,0.36837,0.34069,0.3588,0.36095,0.39755,0.34079,0.  
.28429,0.2822,0.28917,0.26756,0.29258,0.28606,0.27764,0.27922,0.26305,  
0.28614,0.27338,0.30631,0.20289,0.20481,0.20242,0.13006,0.13175,0.1290  
1,0.12888,0.13379,0.12919,0.15052,0.13035,0.14584,0.12328,0.12558,0.13  
619,0.13305,0.1258,0.14129,0.34872,0.33366,0.35656,0.32805,0.35724,0.3  
8208,0.37182,0.36998,0.37113,0.27824,0.26953,0.28459,0.27669,0.28006,0.  
.28358,0.2673,0.29219,0.29186,0.27923,0.27729,0.13619,0.13776,0.12805,  
0.13831,0.11976,0.13343,0.13091,0.12053,0.13141,0.13542,0.12968,0.1191  
2,0.15507,0.12775,0.13618,0.1241,0.13033,0.12557,0.37772,0.34635,0.396  
16,0.3552,0.36318,0.37393,0.36871,0.36555,0.3431,0.27614,0.27666,0.175  
71,0.20138,0.23082,0.1959,0.21597,0.21707,0.2006,0.21432,0.20025,0.120  
49,0.13952,0.11268,0.12678,0.12821,0.12906,0.1071,0.12605,0.1301,0.131  
38,0.13212,0.13468,0.12282,0.12844,0.12798,0.12249,0.14923,0.13827,0.3  
5143,0.36254,0.37961,0.36607,0.35722,0.36065,0.33609,0.34927,0.34073,0.  
.20307,0.20756,0.20883,0.22116,0.20424,0.20206,0.20798,0.22388,0.20828  
,0.21195,0.20654,0.13855,0.12316,0.13151,0.1262,0.13332,0.1381,0.14424  
,0.13031,0.12551,0.11442,0.1288,0.13661,0.12299,0.13218,0.13317,0.1273  
2,0.12419,0.13168,0.35713,0.37465,0.34671,0.37787,0.3821,0.37697,0.373  
63,0.19715,0.1849,0.21447,0.21426,0.21619,0.20817,0.20413,0.20047,0.20  
443,0.21753,0.2012,0.18431,0.19856,0.11876,0.13031,0.1284,0.13203,0.13  
831,0.12793,0.08868,0.13087,0.13963,0.12988,0.12901,0.1205,0.12842,0.1  
2215,0.13881,0.12936,0.12902,0.12391,0.37528,0.35686,0.36687,0.35403,0.  
.35454,0.36498,0.19705,0.2195,0.22009,0.19653,0.20485,0.19842,0.2121,0.  
.20508,0.2064,0.2148,0.18633,0.20925,0.216,0.21528,0.14832,0.12938,0.1



2999,0.12048,0.12052,0.13543,0.13652,0.12309,0.13007,0.12795,0.12866,0.  
.13015,0.12674,0.13113,0.12923,0.13659,0.14953,0.14088,0.31951,0.37415  
,0.3688,0.36696,0.36794,0.17349,0.2004,0.20288,0.22018,0.20977,0.19702  
,0.20991,0.19324,0.21913,0.19945,0.18827,0.19016,0.20947,0.20482,0.212  
94,0.13245,0.12964,0.12386,0.1217,0.12875,0.12979,0.142,0.11805,0.1404  
9,0.1318,0.1283,0.13132,0.12485,0.13068,0.13028,0.12907,0.13216,0.1360  
2,0.34945,0.36216,0.3556,0.23918,0.21259,0.25958,0.21767,0.21448,0.208  
96,0.18132,0.21901,0.21631,0.21878,0.20847,0.21066,0.20478,0.22495,0.2  
2448,0.20353,0.24889,0.13371,0.12993,0.13408,0.12944,0.12729,0.14413,0  
.13242,0.1274,0.13977,0.11584,0.14337,0.13176,0.13624,0.11824,0.1457,0  
.13371,0.13052,0.12875,0.37742,0.19686,0.19039,0.20149,0.22528,0.22035  
,0.21034,0.18463,0.21129,0.23145,0.21299,0.20331,0.21533,0.2006,0.2291  
,0.19263,0.1878,0.20281,0.20658,0.13024,0.12777,0.11669,0.13698,0.1299  
3,0.12932,0.13433,0.1287,0.11966,0.13449,0.12471,0.12769,0.13054,0.137  
02,0.12956,0.11909,0.13698,0.053194,0.20285,0.21358,0.18433,0.20501,0.  
21175,0.21696,0.18082,0.21466,0.20354,0.20889,0.21156,0.20588,0.20427,  
0.20236,0.1883,0.2088,0.2443,0.2078,0.20304,0.12036,0.12999,0.12974,0.  
12114,0.13,0.13092,0.12578,0.12916,0.12844,0.12778,0.12922,0.11475,0.1  
2635,0.13029,0.12367,0.11794,0.12891,0.055022,0.20147,0.20594,0.19483,  
0.13414,0.20371,0.2153,0.21231,0.22308,0.22769,0.2059,0.22205,0.20532,  
0.19909,0.20878,0.19257,0.20948,0.20147,0.20834,0.12826,0.12816,0.1248  
6,0.1291,0.13285,0.1317,0.12771,0.13942,0.12325,0.1136,0.10346,0.12879  
,0.12316,0.13035,0.116,0.11736,0.12428,0.13688,0.054501,0.22511,0.2107  
8,0.20386,0.18625,0.21529,0.21642,0.2067,0.21823,0.16988,0.20217,0.238  
73,0.2087,0.19656,0.18883,0.21765,0.20262,0.18519,0.24087,0.13423,0.13  
167,0.13096,0.12662,0.13452,0.13593,0.13696,0.12613,0.12721,0.13941,0.  
107,0.13224,0.11053,0.13401,0.12911,0.11677,0.13013,0.055945,0.057017,  
0.057081,0.20217,0.24384,0.19637,0.19822,0.19191,0.18943,0.16885,0.186  
59,0.2079,0.23971,0.19121,0.22952,0.21172,0.2012,0.19983,0.14,0.12868,  
0.13139,0.12839,0.11144,0.13701,0.12965,0.13623,0.12554,0.13443,0.1270  
4,0.12669,0.12981,0.14231,0.13928,0.12966,0.13711,0.12739,0.054317,0.0  
55114,0.054685,0.055652,0.21917,0.21529,0.2099,0.10473,0.18379,0.22406  
,0.17012,0.23294,0.19182,0.20209,0.20408,0.20237,0.13965,0.11462,0.123  
01,0.12886,0.12876,0.14401,0.12678,0.12335,0.13136,0.12814,0.14691,0.1  
3685,0.12943,0.13162,0.11517,0.13195,0.12912,0.13142,0.13857,0.13175,0  
.053909,0.055248,0.054805,0.055235,0.054936,0.054611,0.19769,0.19614,0  
.18617,0.15244,0.21481,0.22407,0.20499,0.17915,0.13496,0.11202,0.13794  
,0.13378,0.12794,0.15345,0.12943,0.12041,0.13434,0.12931,0.12726,0.129  
77,0.13021,0.12138,0.12935,0.13125,0.12316,0.13023,0.15737,0.12868,0.1  
3196,0.12924,0.13512,0.055394,0.054371,0.053959,0.055195,0.056,0.05446  
7,0.21172,0.23334,0.14768,0.19811,0.21787,0.055162,0.055055,0.13376,0.  
11842,0.14872,0.12916,0.13223,0.13157,0.12837,0.13709,0.13228,0.12885,  
0.12839,0.1307,0.1096,0.11694,0.13085,0.14892,0.14202,0.13801,0.12726,  
0.13505,0.11881,0.053486,0.052942,0.056291,0.055044,0.054906,0.053729,  
0.055925,0.05598,0.054539,0.05529,0.19274,0.21828,0.054599,0.056019,0.  
056953,0.053848,0.12651,0.13238,0.13533,0.15292,0.12503,0.12335,0.1376  
7,0.13489,0.11727,0.13076,0.10845,0.13839,0.13217,0.12799,0.14646,0.12  
833,0.12755,0.12837,0.12822,0.054521,0.0562,0.054911,0.055267,0.056802  
,0.055041,0.054877,0.055209,0.055797,0.056331,0.055329,0.055239,0.0555  
75,0.055693,0.053854,0.054853,0.054266,0.1319,0.12929,0.13166,0.14002,  
0.12075,0.12996,0.15502,0.12904,0.13061,0.12224,0.13404,0.12868,0.1214  
1,0.13306,0.12516,0.12682,0.055822,0.054002,0.055358,0.053607,0.054337

,0.053413,0.05629,0.056681,0.053999,0.053927,0.055318,0.054439,0.0546,  
0.055243,0.054914,0.053993,0.054628,0.055043,0.05555,0.11041,0.12986,0  
.12844,0.13389,0.13326,0.12945,0.13763,0.12552,0.1297,0.12147,0.13122,  
0.12402,0.1304,0.053481,0.053797,0.055341,0.054912,0.054777,0.055044,0  
.057442,0.055702,0.055836,0.054826,0.054407,0.05537,0.053599,0.053873,  
0.053919,0.053676,0.055221,0.054793,0.055061,0.055631,0.055226,0.13767  
,0.12407,0.12832,0.12554,0.11904,0.14058,0.14672,0.14055,0.12942,0.055  
314,0.053233,0.054345,0.055548,0.055497,0.0562,0.054355,0.055093,0.053  
861,0.054338,0.054436,0.054743,0.054257,0.056143,0.054381,0.054701,0.0  
53914,0.054817,0.055945,0.053919,0.057245,0.055143,0.054944,0.053907,0  
.055785,0.12348,0.13022,0.1098,0.12163,0.054713,0.054126,0.055109,0.05  
4015,0.056315,0.054587,0.05426,0.054283,0.054307,0.056236,0.055601,0.0  
56213,0.055001,0.053402,0.054032,0.05417,0.056755,0.055164,0.052956,0.  
055982,0.054751,0.05479,0.054473,0.054952,0.053648,0.054542,0.054466,0  
.055229,0.055719,0.053709,0.055092,0.056222,0.056013,0.054184,0.056879  
,0.055295,0.054452,0.055194,0.053048,0.055416,0.055491,0.055977,0.0565  
07,0.054972,0.056452,0.056108,0.054639,0.053875,0.054076,0.056145,0.05  
4951,0.054367,0.053607,0.055597,0.053347,0.054501,0.056481,0.054787,0.  
055131,0.05536,0.055115,0.054439,0.054159,0.05486,0.054338,0.055455,0.  
053628,0.054012,0.053929,0.056585,0.056487,0.053986,0.054606,0.054071,  
0.053514,0.055417,0.054848,0.055762,0.057107,0.054801,0.054438,0.05593  
1,0.054363,0.054023,0.054475,0.054655,0.055936,0.054296,0.054445,0.054  
551,0.055669,0.055216,0.055414,0.054183,0.055035,0.054601,0.054548,0.0  
55855,0.053755,0.05412,0.055763,0.054514,0.056091,0.055024,0.055903,0.  
055752,0.054646,0.056086,0.055706,0.054873,0.055295,0.055943,0.056943,  
0.054138,0.057219,0.053999,0.05385,0.053863,0.055051,0.054828,0.055513  
,0.055527,0.055358,0.055494,0.055785,0.055711,0.056025,0.054831,0.0545  
33,0.054571,0.055887,0.054652,0.054306,0.057298,0.054657,0.05536,0.053  
165,0.054581,0.054439,0.054974,0.055752,0.054986,0.054091,0.0543,0.055  
864,0.054896,0.053495,0.056429,0.053498,0.055647,0.054336,0.054924,0.0  
54618,0.055299,0.054374,0.054548,0.055618,0.055106,0.054877,0.054514,0  
.054911,0.055126,0.054242,0.054905,0.055817,0.054911,0.055904,0.055316  
,0.056248,0.05414,0.055118,0.054499,0.055394,0.055012,0.055714,0.05583  
6,0.054316,0.052761,0.053941,0.056694,0.054231,0.054141,0.055581,0.054  
713,0.054402,0.053875,0.053796,0.055422,0.052884,0.054893,0.056109,0.0  
55458,0.056745,0.053954,0.055188  
0.20493,0.20386,0.20852,0.2064,0.20604,0.20544,0.20735,0.20586,0.20336  
,0.20323,0.20644,0.2036,0.20572,0.20353,0.20553,0.20279,0.20287,0.2037  
6,0.20795,0.2055,0.2771,0.29123,0.27178,0.28762,0.20152,0.20514,0.2025  
7,0.20637,0.20683,0.2057,0.20474,0.20619,0.2061,0.2017,0.20315,0.20527  
,0.20654,0.20367,0.20568,0.37612,0.27728,0.27717,0.26783,0.27409,0.281  
19,0.30906,0.20524,0.20766,0.19964,0.20442,0.2057,0.2056,0.20334,0.202  
4,0.20668,0.20557,0.20469,0.20446,0.2047,0.20493,0.20541,0.35435,0.339  
57,0.28072,0.28199,0.27751,0.28842,0.27148,0.27162,0.26864,0.29171,0.2  
0402,0.20741,0.20617,0.20291,0.2053,0.2021,0.20728,0.20384,0.20585,0.2  
0695,0.20415,0.20628,0.20328,0.20543,0.20491,0.38564,0.332,0.35493,0.3  
0375,0.27355,0.26376,0.28615,0.27979,0.28883,0.26918,0.28649,0.27319,0  
.20527,0.20497,0.20319,0.2049,0.20584,0.20248,0.20372,0.20573,0.20221,  
0.20407,0.20393,0.20116,0.20525,0.20824,0.20448,0.20506,0.34706,0.2906  
3,0.36261,0.35691,0.26881,0.28201,0.28178,0.28315,0.28722,0.2847,0.276  
85,0.26355,0.29757,0.26696,0.20408,0.20458,0.20425,0.20451,0.20395,0.2  
0504,0.20558,0.20262,0.20413,0.20482,0.20686,0.20811,0.20455,0.20457,0

.20576,0.20355,0.34666,0.37646,0.34707,0.32088,0.3612,0.36822,0.2842,0.28529,0.30635,0.27065,0.27808,0.29598,0.27185,0.28679,0.27795,0.28443,0.20547,0.20279,0.20509,0.20411,0.20615,0.20298,0.20331,0.20628,0.20458,0.20625,0.2049,0.20486,0.20794,0.20409,0.20317,0.20522,0.20372,0.35359,0.36389,0.36165,0.33316,0.34314,0.35929,0.29164,0.33182,0.27752,0.26694,0.25295,0.30008,0.26645,0.28667,0.27589,0.29576,0.30073,0.20293,0.20407,0.20737,0.20805,0.20598,0.20619,0.20359,0.20689,0.20357,0.20457,0.20303,0.20186,0.20336,0.1286,0.13474,0.13852,0.20623,0.3757,0.35266,0.33907,0.34629,0.34879,0.33351,0.37673,0.27979,0.2768,0.27405,0.29546,0.27802,0.27917,0.27776,0.25935,0.28839,0.27255,0.25637,0.20755,0.20738,0.20593,0.20275,0.20343,0.20319,0.20462,0.20176,0.20444,0.20677,0.20305,0.11855,0.13695,0.12855,0.11251,0.11964,0.12913,0.20616,0.37441,0.34115,0.35176,0.36085,0.35598,0.34413,0.37313,0.28536,0.27017,0.29041,0.25459,0.29043,0.28485,0.26712,0.30605,0.26894,0.27897,0.26577,0.2076,0.20401,0.20325,0.20523,0.20497,0.20082,0.20443,0.2071,0.20314,0.12141,0.12593,0.12505,0.12699,0.1248,0.11146,0.13119,0.13231,0.12749,0.20347,0.35269,0.35651,0.32117,0.3606,0.3594,0.32049,0.3677,0.28935,0.28651,0.28062,0.25862,0.29098,0.28103,0.25476,0.31329,0.27246,0.29017,0.27608,0.27343,0.20565,0.20635,0.20316,0.2055,0.20679,0.20341,0.12229,0.12619,0.13118,0.13542,0.13878,0.12994,0.12928,0.13687,0.13021,0.15303,0.12512,0.12755,0.35853,0.35685,0.35319,0.36924,0.35117,0.38781,0.33708,0.27316,0.27694,0.29554,0.27749,0.29583,0.28455,0.27324,0.27973,0.25746,0.28651,0.274,0.31242,0.20351,0.20703,0.20358,0.12981,0.13108,0.12836,0.12945,0.13303,0.12858,0.15114,0.12985,0.14508,0.1234,0.12505,0.13671,0.13321,0.12632,0.14039,0.3363,0.32727,0.34703,0.34488,0.35364,0.38824,0.35733,0.36776,0.37468,0.27843,0.27085,0.27884,0.28005,0.28081,0.27533,0.26602,0.29352,0.29235,0.27699,0.28342,0.13592,0.13659,0.12777,0.13815,0.11893,0.13238,0.13087,0.12114,0.13159,0.13525,0.12919,0.1187,0.15615,0.12742,0.13551,0.12442,0.13029,0.12534,0.3731,0.35076,0.39161,0.36366,0.35648,0.35913,0.36238,0.34872,0.3356,0.2741,0.28283,0.17634,0.19956,0.23,0.19297,0.21352,0.21409,0.19487,0.21163,0.20077,0.12008,0.13902,0.11295,0.12599,0.12714,0.12858,0.10662,0.12524,0.1302,0.13033,0.13169,0.13333,0.12208,0.12798,0.12758,0.12334,0.1492,0.13762,0.34271,0.3428,0.38079,0.36655,0.337,0.3563,0.33357,0.34435,0.34691,0.19768,0.20645,0.20701,0.22117,0.20256,0.20117,0.20611,0.22617,0.21081,0.21238,0.20516,0.13843,0.12269,0.13192,0.12553,0.13322,0.13858,0.14351,0.13022,0.12508,0.11411,0.12826,0.13548,0.12279,0.1317,0.13273,0.12767,0.1239,0.13148,0.36088,0.38229,0.34787,0.37102,0.37534,0.38511,0.37521,0.19484,0.18569,0.21108,0.21376,0.20714,0.20654,0.20391,0.20564,0.20816,0.2173,0.1949,0.18243,0.19752,0.11866,0.1291,0.12803,0.13163,0.13892,0.12764,0.087264,0.13044,0.13906,0.1289,0.12857,0.12063,0.12722,0.12204,0.13791,0.12922,0.1284,0.1237,0.37518,0.33759,0.36039,0.34228,0.35284,0.36771,0.19156,0.21559,0.22279,0.19322,0.19541,0.19841,0.21041,0.20228,0.20401,0.21691,0.18819,0.20718,0.2095,0.2136,0.14843,0.12947,0.12946,0.12071,0.12047,0.13496,0.13548,0.12162,0.1288,0.12741,0.12794,0.12948,0.12659,0.13064,0.12932,0.13701,0.14939,0.14012,0.33113,0.38021,0.35991,0.3635,0.35524,0.17746,0.19826,0.1974,0.2187,0.21262,0.19498,0.20858,0.19207,0.21782,0.19733,0.18837,0.18644,0.20952,0.20546,0.21043,0.13165,0.12893,0.1239,0.12196,0.12766,0.12872,0.14228,0.11859,0.14101,0.13165,0.12829,0.13113,0.12499,0.1301,0.12992,0.1285,0.1317,0.13544,0.35849,0.35998,0.35633,0.23616,0.2102,0.25952,0.22099,0.21295,0.20163,0.1838,0.21158,0.21461,0.21787,0.2075,0.20904,0.20215,0.21998,0.2

2321,0.20115,0.24319,0.1343,0.12967,0.13356,0.12887,0.12733,0.14453,0.13136,0.1277,0.13968,0.11519,0.14452,0.13098,0.13652,0.11764,0.14528,0.13365,0.13003,0.12841,0.37395,0.19399,0.19525,0.20065,0.22027,0.21426,0.20926,0.18432,0.20773,0.2322,0.21217,0.20603,0.20946,0.20375,0.22736,0.19254,0.18363,0.1978,0.20234,0.12986,0.12619,0.11608,0.13636,0.13012,0.12865,0.13476,0.12824,0.11849,0.13421,0.12426,0.12745,0.13105,0.13716,0.1295,0.11875,0.13612,0.051924,0.20439,0.21223,0.18196,0.20345,0.20745,0.21122,0.18286,0.20786,0.19998,0.2055,0.2083,0.20143,0.2016,0.19898,0.18848,0.21384,0.23909,0.20852,0.20038,0.11962,0.1296,0.12902,0.12032,0.12921,0.13071,0.12533,0.12896,0.12772,0.1279,0.12845,0.11403,0.12635,0.12988,0.12342,0.11704,0.12877,0.053512,0.19961,0.20579,0.20206,0.13028,0.20621,0.21474,0.20964,0.22434,0.22741,0.20671,0.22733,0.20758,0.19624,0.20468,0.19322,0.21238,0.19696,0.20066,0.12752,0.12841,0.12551,0.12871,0.13306,0.13056,0.12672,0.13919,0.12279,0.1126,0.102,0.12852,0.12266,0.13027,0.11534,0.11654,0.12393,0.13722,0.053194,0.22294,0.20269,0.19828,0.18425,0.2197,0.20597,0.20759,0.2176,0.16322,0.20176,0.23102,0.20914,0.19371,0.18597,0.22078,0.2019,0.18706,0.23766,0.13314,0.13104,0.13022,0.12629,0.13487,0.13547,0.13631,0.12555,0.12677,0.13904,0.10613,0.13186,0.11008,0.13414,0.12884,0.11682,0.13056,0.054647,0.055463,0.055203,0.20252,0.24775,0.19129,0.19375,0.19255,0.18438,0.16304,0.18211,0.20885,0.23347,0.19075,0.22661,0.21491,0.19634,0.19872,0.14099,0.13001,0.13158,0.12835,0.1107,0.13769,0.12862,0.13534,0.12511,0.13364,0.12702,0.12649,0.13023,0.14204,0.13909,0.12985,0.13624,0.12692,0.052907,0.053327,0.052838,0.054134,0.22193,0.20923,0.20264,0.10292,0.19001,0.22195,0.17275,0.23075,0.19557,0.20014,0.20272,0.19703,0.1389,0.11359,0.12253,0.12787,0.1283,0.1443,0.12632,0.12289,0.13106,0.12768,0.14694,0.13772,0.12875,0.13121,0.11367,0.13228,0.12904,0.1312,0.13849,0.13205,0.052636,0.05382,0.052793,0.052695,0.052546,0.053345,0.20084,0.19949,0.18795,0.14706,0.21945,0.22978,0.20366,0.18267,0.1345,0.11062,0.13748,0.13285,0.12669,0.15314,0.12928,0.12056,0.13496,0.12887,0.12681,0.12926,0.12993,0.12127,0.12887,0.13135,0.12294,0.12974,0.15796,0.12908,0.13236,0.12866,0.1354,0.053449,0.053088,0.052108,0.053902,0.054204,0.05388,0.2064,0.23473,0.14657,0.19449,0.21598,0.053026,0.053571,0.13304,0.11779,0.14849,0.12961,0.13186,0.13116,0.12794,0.13647,0.13121,0.1284,0.12874,0.13054,0.10919,0.11684,0.13068,0.14846,0.14192,0.13793,0.12808,0.1351,0.11881,0.05266,0.051841,0.055033,0.054324,0.052753,0.052798,0.053827,0.05406,0.052724,0.053987,0.19304,0.22084,0.053133,0.053863,0.055762,0.053134,0.12624,0.13226,0.1353,0.15386,0.1252,0.12365,0.13742,0.13485,0.11652,0.13058,0.10783,0.13881,0.13156,0.12727,0.14686,0.12831,0.12707,0.1286,0.1273,0.0537,0.054619,0.053433,0.053664,0.055179,0.053771,0.053545,0.053648,0.054801,0.054782,0.053695,0.054217,0.054666,0.054298,0.052346,0.05308,0.05295,0.13136,0.12881,0.13062,0.13884,0.12035,0.12982,0.15537,0.12878,0.13052,0.12253,0.13391,0.12839,0.12034,0.13287,0.12511,0.12663,0.05497,0.052698,0.053427,0.052574,0.053605,0.052251,0.054351,0.055015,0.052988,0.052984,0.054068,0.053468,0.052597,0.054221,0.053452,0.052898,0.053181,0.053621,0.053629,0.11013,0.12954,0.12748,0.13364,0.13266,0.12924,0.13777,0.12481,0.12951,0.12184,0.13055,0.124,0.13038,0.051927,0.053048,0.053927,0.053469,0.053755,0.054145,0.055782,0.054357,0.05464,0.05394,0.05324,0.054436,0.051905,0.052741,0.052681,0.052899,0.054002,0.053642,0.053737,0.054393,0.05399,0.13737,0.12376,0.12705,0.12464,0.11846,0.14052,0.14647,0.14011,0.12933,0.053373,0.051878,0.052867,0.053574,0.05389,0.054873,0.053565,0.053578,0.





|         |         |         |         |         |         |
|---------|---------|---------|---------|---------|---------|
| 0       | 0       | 0       | 0       | 0       | 0       |
| 0       | 0       | 0       | 0       | 0       | 0.28658 |
| 0.44138 | 0.3436  | 0.35899 | 0.33333 | 0.34611 | 0.33333 |
| 0.34821 | 0.27493 | 0.41093 | 0.48316 | 0.48792 | 0.5     |
| 0.60203 | 0.5     | 0.54127 | 0.52239 | 0.40316 | 0.5     |
| 0.56696 | 0.5     | 0.60869 | 0.46443 | 0.45027 | 0.5     |
| 0.5     | 0.6033  | 0       | 0       | 0       | 0       |
| 0       | 0       | 0       | 0       | 0       | 0.48422 |
| 0.30253 | 0.33333 | 0.2888  | 0.33388 | 0.36277 | 0.34444 |
| 0.36573 | 0.33811 | 0.25374 | 0.31956 | 0.48663 | 0.41821 |
| 0.46702 | 0.5     | 0.55204 | 0.50385 | 0.45603 | 0.48763 |
| 0.48956 | 0.51572 | 0.44375 | 0.65303 | 0.5     | 0.44749 |
| 0.41553 | 0.43459 | 0.39291 | 0.53859 | 0       | 0       |
| 0       | 0       | 0       | 0       | 0       | 0.5     |
| 0.54515 | 0.62254 | 0.32443 | 0.35416 | 0.33333 | 0.27287 |
| 0.39777 | 0.27581 | 0.28109 | 0.3638  | 0.35352 | 0.3547  |
| 0.44696 | 0.354   | 0.59324 | 0.50561 | 0.46651 | 0.50183 |
| 0.56493 | 0.4758  | 0.48207 | 0.62766 | 0.47702 | 0.5857  |
| 0.5659  | 0.62498 | 0.50788 | 0.48943 | 0.33587 | 0.49726 |
| 0       | 0       | 0       | 0       | 0       | 0       |
| 0.5     | 0.6392  | 0.4644  | 0.30586 | 0.5     | 0.31675 |
| 0.35232 | 0.22561 | 0.28123 | 0.33333 | 0.20696 | 0.38577 |
| 0.36308 | 0.32545 | 0.48059 | 0.42245 | 0.5895  | 0.5     |
| 0.56797 | 0.53058 | 0.54212 | 0.46192 | 0.5     | 0.49024 |
| 0.51745 | 0.5     | 0.55693 | 0.51017 | 0.49118 | 0.47355 |
| 0.5     | 0.5     | 0       | 0       | 0       | 0       |
| 0       | 0.5     | 0.53356 | 0.5     | 0.46503 | 0.5     |
| 0.5     | 0.30229 | 0.36021 | 0.33333 | 0.33333 | 0.35527 |
| 0.29398 | 0.26434 | 0.32317 | 0.34238 | 0.5901  | 0.62484 |
| 0.53613 | 0.5     | 0.47747 | 0.413   | 0.46349 | 0.49292 |
| 0.46494 | 0.4827  | 0.43487 | 0.4393  | 0.5     | 0.4978  |
| 0.50944 | 0.36275 | 0.50596 | 0.5     | 0       | 0       |
| 0       | 0.58902 | 0.46039 | 0.49745 | 0.56227 | 0.46674 |
| 0.5     | 0.5074  | 0.51386 | 0.37506 | 0.35796 | 0.35283 |
| 0.33333 | 0.38168 | 0.31769 | 0.36014 | 0.32918 | 0.33549 |
| 0.54503 | 0.5     | 0.5     | 0.43151 | 0.50605 | 0.4437  |
| 0.58377 | 0.5578  | 0.5     | 0.5     | 0.41767 | 0.5     |
| 0.5804  | 0.60257 | 0.46961 | 0.59132 | 0.47204 | 0.5     |
| 0       | 0.5     | 0.49856 | 0.39093 | 0.37252 | 0.52553 |
| 0.52491 | 0.46541 | 0.49739 | 0.49552 | 0.27693 | 0.27459 |
| 0.29531 | 0.30009 | 0.3141  | 0.37078 | 0.35653 | 0.36552 |
| 0.33692 | 0.47412 | 0.43426 | 0.35065 | 0.48953 | 0.4792  |
| 0.46657 | 0.69423 | 0.48721 | 0.50367 | 0.5     | 0.5     |
| 0.5     | 0.35852 | 0.43207 | 0.36813 | 0.5     | 0.46115 |
| 1       | 0.47891 | 0.5     | 0.45152 | 0.5     | 0.56515 |
| 0.55212 | 0.49747 | 0.56074 | 0.52534 | 0.41343 | 0.33333 |
| 0.35144 | 0.28428 | 0.25745 | 0.33333 | 0.34334 | 0.3664  |
| 0.39004 | 0.34625 | 0.43989 | 0.54286 | 0.47785 | 0.52353 |
| 0.49914 | 0.5     | 0.44297 | 0.45622 | 0.78929 | 0.49356 |
| 0.49321 | 0.4578  | 0.49317 | 0.47678 | 0.65295 | 0.61443 |
| 0.49228 | 1       | 0.41873 | 0.40851 | 0.51115 | 0.57288 |
| 0.59289 | 0.52531 | 0.49715 | 0.5     | 0.5     | 0.5     |

|         |         |         |         |         |         |
|---------|---------|---------|---------|---------|---------|
| 0.33672 | 0.33333 | 0.34426 | 0.34169 | 0.34899 | 0.33333 |
| 0.36894 | 0.37074 | 0.50292 | 0.64655 | 0.5     | 0.47089 |
| 0.5     | 0.58211 | 0.5     | 0.52419 | 0.53854 | 0.51288 |
| 0.50066 | 0.5     | 0.49415 | 0.46491 | 0.57635 | 0.49101 |
| 0.45496 | 0.54819 | 1       | 0.58608 | 0.4562  | 0.40469 |
| 0.5     | 0.5     | 0.5     | 0.46409 | 0.49242 | 0.56105 |
| 0.5     | 0.36543 | 0.37906 | 0.33935 | 0.33336 | 0.31417 |
| 0.34301 | 0.35062 | 0.38578 | 0.54024 | 0.48451 | 0.5     |
| 0.57831 | 0.29076 | 0.51372 | 0.5     | 0.5     | 0.50893 |
| 0.43629 | 0.51802 | 0.46134 | 0.42968 | 0.58786 | 0.48483 |
| 0.5     | 0.5067  | 1       | 1       | 1       | 0.68316 |
| 0.5     | 0.55897 | 0.5     | 0.58676 | 0.5     | 0.5152  |
| 0.45803 | 0.44952 | 0.346   | 0.35074 | 0.35776 | 0.38727 |
| 0.34476 | 0.33741 | 0.53026 | 0.41775 | 0.47614 | 0.5     |
| 0.5     | 0.39109 | 0.5836  | 0.5427  | 0.5     | 0.5     |
| 0.33764 | 0.46858 | 0.56999 | 0.56609 | 0.5     | 0.39852 |
| 0.51471 | 0.5     | 1       | 1       | 1       | 1       |
| 0.5     | 0.57512 | 0.48209 | 0.5     | 0.5     | 0.50054 |
| 0.46252 | 0.50678 | 0.5     | 0.28811 | 0.33698 | 0.35909 |
| 0.50025 | 0.47962 | 0.49393 | 0.58641 | 0.46185 | 0.5     |
| 0.5     | 0.32572 | 0.5     | 0.5     | 0.53435 | 0.14103 |
| 0.60283 | 0.47233 | 0.5     | 0.49063 | 0.52395 | 0.5     |
| 0.67115 | 0.5     | 1       | 1       | 1       | 1       |
| 1       | 1       | 0.57002 | 0.64005 | 0.45265 | 0.50489 |
| 0.51696 | 0.48565 | 0.42715 | 0.5     | 0.57636 | 0.5726  |
| 0.48513 | 0.41066 | 0.54011 | 0.48656 | 0.49349 | 0.54122 |
| 0.41919 | 0.50986 | 0.57237 | 0.40119 | 0.5     | 0.45974 |
| 0.46943 | 0.5     | 0.52057 | 0.5     | 0.53659 | 0.4395  |
| 0.49296 | 0.5142  | 0.43975 | 1       | 1       | 1       |
| 1       | 1       | 1       | 0.37411 | 0.51086 | 0.5     |
| 0.41781 | 0.44664 | 1       | 1       | 0.48802 | 0.50328 |
| 0.43385 | 0.5286  | 0.5     | 0.60044 | 0.577   | 0.54476 |
| 0.47992 | 0.53083 | 0.58746 | 0.53996 | 0.45074 | 0.48324 |
| 0.5     | 0.45544 | 0.46409 | 0.42621 | 0.62948 | 0.53509 |
| 0.5     | 1       | 1       | 1       | 1       | 1       |
| 1       | 1       | 1       | 1       | 1       | 0.48079 |
| 0.50183 | 1       | 1       | 1       | 1       | 0.5     |
| 0.48059 | 0.51614 | 0.5311  | 0.64524 | 0.40575 | 0.46099 |
| 0.5     | 0.5     | 0.5     | 0.5     | 0.50294 | 0.62186 |
| 0.54602 | 0.45327 | 0.5     | 0.5     | 0.40481 | 0.53061 |
| 1       | 1       | 1       | 1       | 1       | 1       |
| 1       | 1       | 1       | 1       | 1       | 1       |
| 1       | 1       | 1       | 1       | 1       | 0.5     |
| 0.52075 | 0.34375 | 0.41301 | 0.5138  | 0.49534 | 0.55203 |
| 0.37638 | 0.38655 | 0.54385 | 0.45544 | 0.49391 | 0.50064 |
| 0.5     | 0.49805 | 0.5     | 1       | 1       | 1       |
| 1       | 1       | 1       | 1       | 1       | 1       |
| 1       | 1       | 1       | 1       | 1       | 1       |
| 1       | 1       | 1       | 1       | 0.62302 | 0.5     |
| 0.68084 | 0.49395 | 0.5     | 0.5     | 0.5063  | 0.58951 |
| 0.49973 | 0.5     | 0.45565 | 0.5     | 0.56105 | 1       |
| 1       | 1       | 1       | 1       | 1       | 1       |



|         |         |         |         |         |         |   |
|---------|---------|---------|---------|---------|---------|---|
| 1       | 1       | 1       | 1       | 1       | 1       | 1 |
| 1       | 1       | 1       | 1       | 1       | 1       | 1 |
| 1       | 1       | 0.5     | 0.5     | 0.5     | 0.46668 | 1 |
| 0.54738 | 0.4183  | 0.5     | 0.43522 | 0.43481 | 1       | 1 |
| 1       | 1       | 1       | 1       | 1       | 1       | 1 |
| 1       | 1       | 1       | 1       | 1       | 1       | 1 |
| 1       | 1       | 1       | 1       | 1       | 1       | 1 |
| 1       | 1       | 1       | 1       | 1       | 1       | 1 |
| 0.42938 | 0.45918 | 0.55079 | 0.55349 | 1       | 1       | 1 |
| 1       | 1       | 1       | 1       | 1       | 1       | 1 |
| 1       | 1       | 1       | 1       | 1       | 1       | 1 |
| 1       | 1       | 1       | 1       | 1       | 1       | 1 |
| 1       | 1       | 1       | 1       | 1       | 1       | 1 |
| 1       | 1       | 1       | 1       | 1       | 1       | 1 |
| 1       | 1       | 1       | 1       | 1       | 1       | 1 |
| 1       | 1       | 1       | 1       | 1       | 1       | 1 |
| 1       | 1       | 1       | 1       | 1       | 1       | 1 |
| 1       | 1       | 1       | 1       | 1       | 1       | 1 |
| 1       | 1       | 1       | 1       | 1       | 1       | 1 |
| 1       | 1       | 1       | 1       | 1       | 1       | 1 |
| 1       | 1       | 1       | 1       | 1       | 1       | 1 |
| 1       | 1       | 1       | 1       | 1       | 1       | 1 |
| 1       | 1       | 1       | 1       | 1       | 1       | 1 |
| 1       | 1       | 1       | 1       | 1       | 1       | 1 |
| 1       | 1       | 1       | 1       | 1       | 1       | 1 |
| 1       | 1       | 1       | 1       | 1       | 1       | 1 |
| 1       | 1       | 1       | 1       | 1       | 1       | 1 |
| 1       | 1       | 1       | 1       | 1       | 1       | 1 |
| 1       | 1       | 1       | 1       | 1       | 1       | 1 |
| 1       | 1       | 1       | 1       | 1       | 1       | 1 |
| 1       | 1       | 1       | 1       | 1       | 1       | 1 |
| 1       | 1       | 1       | 1       | 1       | 1       | 1 |
| 1       | 1       | 1       | 1       | 1       | 1       | 1 |
| 1       | 1       | 1       | 1       | 1       | 1       | 1 |
| 1       | 1       | 1       | 1       | 1       | 1       | 1 |
| 1       | 1       | 1       | 1       | 1       | 1       | 1 |
| 1       | 1       | 1       | 1       | 1       | 1       | 1 |
| 1       | 1       | 1       | 1       | 1       | 1       | 1 |
| 1       | 1       | 1       | 1       | 1       | 1       | 1 |
| 1       | 1       | 1       | 1       | 1       | 1       | 1 |
| 1       | 1       | 1       | 1       | 1       | 1       | 1 |
| 1       | 1       | 1       | 1       | 1       | 1       | 1 |
| 1       | 1       | 1       | 1       | 1       | 1       | 1 |
| gtSs=1  | 1       | 1       | 1       | 1       | 1       | 1 |
| 1       | 1       | 1       | 1       | 1       | 1       | 1 |
| 1       | 1       | 1       | 1       | 1       | 1       | 1 |
| 1       | 1       | 0.52999 | 0.41984 | 0.47847 | 0.52128 | 1 |
| 1       | 1       | 1       | 1       | 1       | 1       | 1 |
| 1       | 1       | 1       | 1       | 1       | 1       | 1 |
| 1       | 1       | 1       | 0       | 0.5     | 0.40531 | 1 |
| 0.50605 | 0.5339  | 0.47385 | 0.48377 | 1       | 1       | 1 |
| 1       | 1       | 1       | 1       | 1       | 1       | 1 |
| 1       | 1       | 1       | 1       | 1       | 1       | 1 |

|         |         |         |         |         |         |         |
|---------|---------|---------|---------|---------|---------|---------|
| 1       | 0       | 0       | 0.53963 | 0.67874 | 0.5     |         |
| 0.63632 | 0.50603 | 0.48267 | 0.5116  | 0.50532 |         | 1       |
| 1       | 1       | 1       | 1       | 1       | 1       |         |
| 1       | 1       | 1       | 1       | 1       | 1       |         |
| 1       | 1       | 0       | 0       | 0       | 0.50778 |         |
| 0.40924 | 0.55703 | 0.48921 |         | 0.5     | 0.5     | 0.46027 |
| 0.48625 | 0.46159 | 1       |         | 1       | 1       | 1       |
| 1       | 1       | 1       | 1       | 1       | 1       | 1       |
| 1       | 1       | 1       | 1       | 1       | 1       | 1       |
| 0       | 0       | 0       | 0       | 0.42179 | 0.4481  |         |
| 0.52744 | 0.43047 | 0.5306  | 0.60702 | 0.4675  | 0.48713 |         |
| 0.63393 | 0.55944 | 1       | 1       | 1       | 1       | 1       |
| 1       | 1       | 1       | 1       | 1       | 1       | 1       |
| 1       | 1       | 1       | 1       | 1       | 1       | 1       |
| 0       | 0       | 0       | 0       | 0       | 0       | 0       |
| 0.5     | 0.47586 | 0.54709 | 0.45337 | 0.5108  | 0.43799 |         |
| 0.38637 | 0.48563 | 0.28975 |         | 0.5     | 1       | 1       |
| 1       | 1       | 1       | 1       | 1       | 1       | 1       |
| 1       | 1       | 1       | 1       | 1       | 1       | 1       |
| 1       | 1       | 1       | 0       | 0       | 0       | 0       |
| 0       | 0       | 0       | 0.48009 | 0.43531 | 0.51247 |         |
| 0.5     | 0.5008  | 0.5     | 0.50203 | 0.43367 | 0.40231 |         |
| 0.41314 | 0.44735 |         | 1       | 1       | 1       | 1       |
| 1       | 1       | 1       | 1       | 1       | 1       | 1       |
| 1       | 1       | 1       | 0.48569 | 0.55036 | 0.51808 |         |
| 1       | 0       | 0       | 0       | 0       | 0       | 0       |
| 0       | 0       | 0.5     | 0.5     | 0.43709 | 0.5     |         |
| 0.58091 | 0.58682 | 0.48016 | 0.55973 | 0.58448 | 0.59864 |         |
| 0.42413 | 1       | 1       | 1       | 1       | 1       | 1       |
| 1       | 1       | 1       | 1       | 1       | 1       | 1       |
| 0.50748 | 0.33977 | 0.4769  |         | 0.5     | 0.5     | 0.41761 |
| 1       | 0       | 0       | 0       | 0       | 0       | 0       |
| 0       | 0       | 0.39549 | 0.48896 | 0.48682 | 0.46032 |         |
| 0.58909 | 0.34691 | 0.44371 |         | 0.5     | 0.5     | 0.52701 |
| 0.42367 | 1       | 1       | 1       | 1       | 1       | 1       |
| 1       | 1       | 1       | 1       | 0.5     | 0.5     |         |
| 0.52495 | 0.5     | 0.4982  | 0.49716 | 0.51148 | 0.48487 |         |
| 0.5453  | 1       | 0       | 0       | 0       | 0       | 0       |
| 0       | 0       | 0       | 0.45233 | 0.49726 | 0.47203 |         |
| 0.5     | 0.40902 | 0.372   | 0.53364 | 0.44155 | 0.4987  |         |
| 0.41564 | 0.5     | 0.63888 |         | 1       | 1       | 1       |
| 1       | 1       | 1       | 0.5     | 0.48554 | 0.48973 |         |
| 0.5     | 0.55391 | 0.57741 | 0.5     | 0.38713 | 0.49886 |         |
| 0.51007 | 0.5112  | 0.35898 |         | 0       | 0       | 0       |
| 0       | 0       | 0       | 0       | 0.55598 | 0.51302 |         |
| 0.38431 | 0.5     | 0.59306 | 0.45463 | 0.45552 | 0.41901 |         |
| 0.55711 | 0.33674 | 0.45841 | 0.46478 |         | 1       | 1       |
| 1       | 0.58462 | 0.45536 | 0.55978 | 0.5     | 0.5     |         |
| 0.46178 | 0.44294 | 0.5     | 0.55839 | 0.51088 | 0.41399 |         |
| 0.43137 | 0.5471  | 0.5     | 0.5     | 0       | 0       | 0       |
| 0       | 0       | 0       | 0       | 0       | 0       | 0       |
| 0       | 0.5     | 0.46475 | 0.50063 | 0.42508 | 0.5     |         |

|         |         |         |         |         |         |
|---------|---------|---------|---------|---------|---------|
| 0.50407 | 0.5     | 0.5     | 0.44774 | 0.35373 | 0.47515 |
| 0.49359 | 0.46972 | 0.52183 | 0.43955 | 0.5     | 0.5     |
| 0.52087 | 0.51789 | 0.44331 | 0.29691 | 0.54011 | 0.40137 |
| 0.51487 | 0.50693 | 0.5     | 0.54262 | 0.53306 | 0.48617 |
| 0       | 0       | 0       | 0       | 0       | 0       |
| 0       | 0       | 0       | 0.5     | 0.68067 | 0.37566 |
| 0.25567 | 0.32409 | 0.33915 | 0.33333 | 0.30777 | 0.33333 |
| 0.27221 | 0.40656 | 0.58907 | 0.51684 | 0.51208 | 0.5     |
| 0.39797 | 0.5     | 0.45873 | 0.47761 | 0.59684 | 0.5     |
| 0.43304 | 0.5     | 0.39131 | 0.53557 | 0.54973 | 0.5     |
| 0.5     | 0.3967  | 0       | 0       | 0       | 0       |
| 0       | 0       | 0       | 0       | 0       | 0       |
| 0.35687 | 0.33333 | 0.37201 | 0.33388 | 0.29529 | 0.34444 |
| 0.36573 | 0.33811 | 0.41299 | 0.31694 | 0.51337 | 0.58179 |
| 0.53298 | 0.5     | 0.44796 | 0.49615 | 0.54397 | 0.51237 |
| 0.51044 | 0.48428 | 0.55625 | 0.34697 | 0.5     | 0.55251 |
| 0.58447 | 0.56541 | 0.60709 | 0.46141 | 0       | 0       |
| 0       | 0       | 0       | 0       | 0       | 0       |
| 0       | 0       | 0.34654 | 0.35592 | 0.33333 | 0.35969 |
| 0.20446 | 0.35444 | 0.31653 | 0.2724  | 0.28879 | 0.2906  |
| 0.55304 | 0.646   | 0.40676 | 0.49439 | 0.53349 | 0.49817 |
| 0.43507 | 0.5242  | 0.51793 | 0.37234 | 0.52298 | 0.4143  |
| 0.4341  | 0.37502 | 0.49212 | 0.51057 | 0.66413 | 0.50274 |
| 0       | 0       | 0       | 0       | 0       | 0       |
| 0       | 0       | 0       | 0       | 0       | 0.41966 |
| 0.35232 | 0.3872  | 0.44948 | 0.33333 | 0.39652 | 0.22846 |
| 0.27384 | 0.31551 | 0.51941 | 0.57755 | 0.4105  | 0.5     |
| 0.43203 | 0.46942 | 0.45788 | 0.53808 | 0.5     | 0.50976 |
| 0.48255 | 0.5     | 0.44307 | 0.48983 | 0.50882 | 0.52645 |
| 0.5     | 0.5     | 0       | 0       | 0       | 0       |
| 0       | 0       | 0       | 0       | 0       | 0       |
| 0       | 0.3793  | 0.28061 | 0.33333 | 0.33333 | 0.32397 |
| 0.33944 | 0.36809 | 0.40219 | 0.28784 | 0.4099  | 0.37516 |
| 0.46387 | 0.5     | 0.52253 | 0.587   | 0.53651 | 0.50708 |
| 0.53506 | 0.5173  | 0.56513 | 0.5607  | 0.5     | 0.5022  |
| 0.49056 | 0.63725 | 0.49404 | 0.5     | 0       | 0       |
| 0       | 0       | 0       | 0       | 0       | 0       |
| 0       | 0       | 0       | 0.24989 | 0.35796 | 0.29435 |
| 0.33333 | 0.37901 | 0.37334 | 0.36014 | 0.39943 | 0.32903 |
| 0.45497 | 0.5     | 0.5     | 0.56849 | 0.49395 | 0.5563  |
| 0.41623 | 0.4422  | 0.5     | 0.5     | 0.58233 | 0.5     |
| 0.4196  | 0.39743 | 0.53039 | 0.40868 | 0.52796 | 0.5     |
| 0       | 0       | 0       | 0       | 0       | 0       |
| 0       | 0       | 0       | 0       | 0.34355 | 0.31472 |
| 0.35234 | 0.37816 | 0.34295 | 0.31111 | 0.28695 | 0.26896 |
| 0.33692 | 0.52588 | 0.56574 | 0.64935 | 0.51047 | 0.5208  |
| 0.53343 | 0.30577 | 0.51279 | 0.49633 | 0.5     | 0.5     |
| 0.5     | 0.64148 | 0.56793 | 0.63187 | 0.5     | 0.53885 |
| 0       | 0       | 0       | 0       | 0       | 0       |
| 0       | 0       | 0       | 0       | 0       | 0.33333 |
| 0.29687 | 0.3546  | 0.35482 | 0.33333 | 0.34334 | 0.24783 |
| 0.23007 | 0.34343 | 0.56011 | 0.45714 | 0.52215 | 0.47647 |

|         |         |         |         |         |         |
|---------|---------|---------|---------|---------|---------|
| 0.50086 | 0.5     | 0.55703 | 0.54378 | 0.21071 | 0.50644 |
| 0.50679 | 0.5422  | 0.50683 | 0.52322 | 0.34705 | 0.38557 |
| 0.50772 | 0       | 0       | 0       | 0       | 0       |
| 0       | 0       | 0       | 0       | 0       | 0       |
| 0.33672 | 0.33333 | 0.34426 | 0.34169 | 0.34899 | 0.33333 |
| 0.36181 | 0.32016 | 0.49708 | 0.35345 | 0.5     | 0.52911 |
| 0.5     | 0.41789 | 0.5     | 0.47581 | 0.46146 | 0.48712 |
| 0.49934 | 0.5     | 0.50585 | 0.53509 | 0.42365 | 0.50899 |
| 0.54504 | 0.45181 | 0       | 0       | 0       | 0       |
| 0       | 0       | 0       | 0       | 0       | 0       |
| 0       | 0.32236 | 0.24188 | 0.30757 | 0.32023 | 0.36599 |
| 0.31399 | 0.29875 | 0.23884 | 0.45976 | 0.51549 | 0.5     |
| 0.42169 | 0.70924 | 0.48628 | 0.5     | 0.5     | 0.49107 |
| 0.56371 | 0.48198 | 0.53866 | 0.57032 | 0.41214 | 0.51517 |
| 0.5     | 0.4933  | 0       | 0       | 0       | 0       |
| 0       | 0       | 0       | 0       | 0       | 0       |
| 0       | 0       | 0.25888 | 0.38828 | 0.35776 | 0.30376 |
| 0.33683 | 0.32517 | 0.46974 | 0.58225 | 0.52386 | 0.5     |
| 0.5     | 0.60891 | 0.4164  | 0.4573  | 0.5     | 0.5     |
| 0.66236 | 0.53142 | 0.43001 | 0.43391 | 0.5     | 0.60148 |
| 0.48529 | 0.5     | 0       | 0       | 0       | 0       |
| 0       | 0       | 0       | 0       | 0       | 0       |
| 0       | 0       | 0       | 0.40582 | 0.32604 | 0.35909 |
| 0.49975 | 0.52038 | 0.50607 | 0.41359 | 0.53815 | 0.5     |
| 0.5     | 0.67428 | 0.5     | 0.5     | 0.46565 | 0.85897 |
| 0.39717 | 0.52767 | 0.5     | 0.50937 | 0.47605 | 0.5     |
| 0.32885 | 0.5     | 0       | 0       | 0       | 0       |
| 0       | 0       | 0       | 0       | 0       | 0       |
| 0       | 0       | 0       | 0       | 0.42364 | 0.4274  |
| 0.51487 | 0.58934 | 0.45989 | 0.51344 | 0.50651 | 0.45878 |
| 0.58081 | 0.49014 | 0.42763 | 0.59881 | 0.5     | 0.54026 |
| 0.53057 | 0.5     | 0.47943 | 0.5     | 0.46341 | 0.5605  |
| 0.50704 | 0.4858  | 0.56025 | 0       | 0       | 0       |
| 0       | 0       | 0       | 0       | 0       | 0       |
| 0       | 0       | 0       | 0       | 0.51198 | 0.49672 |
| 0.56615 | 0.4714  | 0.5     | 0.39956 | 0.423   | 0.45524 |
| 0.52008 | 0.46917 | 0.41254 | 0.46004 | 0.54926 | 0.51676 |
| 0.5     | 0.54456 | 0.53591 | 0.57379 | 0.37052 | 0.46491 |
| 0.5     | 0       | 0       | 0       | 0       | 0       |
| 0       | 0       | 0       | 0       | 0       | 0       |
| 0       | 0       | 0       | 0       | 0       | 0.5     |
| 0.51941 | 0.48386 | 0.4689  | 0.35476 | 0.59425 | 0.53901 |
| 0.5     | 0.5     | 0.5     | 0.5     | 0.49706 | 0.37814 |
| 0.45398 | 0.54673 | 0.5     | 0.5     | 0.59519 | 0.46939 |
| 0       | 0       | 0       | 0       | 0       | 0       |
| 0       | 0       | 0       | 0       | 0       | 0       |
| 0       | 0       | 0       | 0       | 0       | 0.5     |
| 0.47925 | 0.65625 | 0.58699 | 0.4862  | 0.50466 | 0.44797 |
| 0.62362 | 0.61345 | 0.45615 | 0.54456 | 0.50609 | 0.49936 |
| 0.5     | 0.50195 | 0.5     | 0       | 0       | 0       |
| 0       | 0       | 0       | 0       | 0       | 0       |
| 0       | 0       | 0       | 0       | 0       | 0       |

|         |         |         |         |         |         |   |
|---------|---------|---------|---------|---------|---------|---|
| 0       | 0       | 0       | 0       | 0.37698 | 0.5     |   |
| 0.31916 | 0.50605 | 0.5     | 0.5     | 0.4937  | 0.41049 |   |
| 0.50027 | 0.5     | 0.54435 | 0.5     | 0.43895 | 0       |   |
| 0       | 0       | 0       | 0       | 0       | 0       |   |
| 0       | 0       | 0       | 0       | 0       | 0       |   |
| 0       | 0       | 0       | 0       | 0       | 0       |   |
| 0       | 0       | 0.5     | 0.5     | 0.5     | 0.53332 |   |
| 0.45262 | 0.5817  | 0.5     | 0.56478 | 0.56519 | 0       |   |
| 0       | 0       | 0       | 0       | 0       | 0       |   |
| 0       | 0       | 0       | 0       | 0       | 0       |   |
| 0       | 0       | 0       | 0       | 0       | 0       |   |
| 0       | 0       | 0       | 0       | 0       | 0       |   |
| 0.57062 | 0.54082 | 0.44921 | 0.44651 | 0       | 0       | 0 |
| 0       | 0       | 0       | 0       | 0       | 0       |   |
| 0       | 0       | 0       | 0       | 0       | 0       |   |
| 0       | 0       | 0       | 0       | 0       | 0       |   |
| 0       | 0       | 0       | 0       | 0       | 0       |   |
| 0       | 0       | 0       | 0       | 0       | 0       |   |
| 0       | 0       | 0       | 0       | 0       | 0       |   |
| 0       | 0       | 0       | 0       | 0       | 0       |   |
| 0       | 0       | 0       | 0       | 0       | 0       |   |
| 0       | 0       | 0       | 0       | 0       | 0       |   |
| 0       | 0       | 0       | 0       | 0       | 0       |   |
| 0       | 0       | 0       | 0       | 0       | 0       |   |
| 0       | 0       | 0       | 0       | 0       | 0       |   |
| 0       | 0       | 0       | 0       | 0       | 0       |   |
| 0       | 0       | 0       | 0       | 0       | 0       |   |
| 0       | 0       | 0       | 0       | 0       | 0       |   |
| 0       | 0       | 0       | 0       | 0       | 0       |   |
| 0       | 0       | 0       | 0       | 0       | 0       |   |
| 0       | 0       | 0       | 0       | 0       | 0       |   |
| 0       | 0       | 0       | 0       | 0       | 0       |   |
| 0       | 0       | 0       | 0       | 0       | 0       |   |
| 0       | 0       | 0       | 0       | 0       | 0       |   |
| 0       | 0       | 0       | 0       | 0       | 0       |   |
| 0       | 0       | 0       | 0       | 0       | 0       |   |
| 0       | 0       | 0       | 0       | 0       | 0       |   |
| 0       | 0       | 0       | 0       | 0       | 0       |   |
| 0       | 0       | 0       | 0       | 0       | 0       |   |
| 0       | 0       | 0       | 0       | 0       | 0       |   |
| gtSp=0  | 0       | 0       | 0       | 0       | 0       | 0 |
| 0       | 0       | 0       | 0       | 0       | 0       |   |
| 0       | 0       | 0       | 0       | 0       | 0       |   |
| 0       | 0       | 0.47001 | 0.58016 | 0.52153 | 0.47872 |   |
| 0       | 0       | 0       | 0       | 0       | 0       |   |
| 0       | 0       | 0       | 0       | 0       | 0       |   |

|         |         |         |         |         |         |         |
|---------|---------|---------|---------|---------|---------|---------|
| 0       | 0       | 0       | 1       | 0.5     | 0.59469 |         |
| 0.49395 | 0.4661  | 0.52615 | 0.51623 |         | 0       | 0       |
| 0       | 0       | 0       | 0       | 0       | 0       |         |
| 0       | 0       | 0       | 0       | 0       | 0       |         |
| 0       | 1       | 1       | 0.46037 | 0.32126 |         | 0.5     |
| 0.36368 | 0.49397 | 0.51733 | 0.4884  | 0.49468 |         | 0       |
| 0       | 0       | 0       | 0       | 0       | 0       |         |
| 0       | 0       | 0       | 0       | 0       | 0       |         |
| 0       | 0       | 1       | 1       | 1       | 0.49222 |         |
| 0.59076 | 0.44297 | 0.51079 |         | 0.5     | 0.5     | 0.53973 |
| 0.51375 | 0.53841 | 0       |         | 0       | 0       | 0       |
| 0       | 0       | 0       | 0       | 0       | 0       | 0       |
| 0       | 0       | 0       | 0       | 0       | 0       | 0       |
| 1       | 1       | 1       | 1       | 0.57821 |         | 0.5519  |
| 0.47256 | 0.56953 | 0.4694  | 0.39298 | 0.5325  |         | 0.51287 |
| 0.36607 | 0.44056 | 0       | 0       | 0       | 0       | 0       |
| 0       | 0       | 0       | 0       | 0       | 0       | 0       |
| 0       | 0       | 0       | 0       | 0       | 0       | 0       |
| 1       | 1       | 1       | 1       | 1       | 1       | 1       |
| 0.5     | 0.52414 | 0.45291 | 0.54663 | 0.4892  |         | 0.56201 |
| 0.61363 | 0.51437 | 0.71025 |         | 0.5     | 0       | 0       |
| 0       | 0       | 0       | 0       | 0       | 0       | 0       |
| 0       | 0       | 0       | 0       | 0       | 0       | 0       |
| 0       | 0       | 0       | 1       | 1       |         | 1       |
| 1       | 1       | 1       | 0.51991 | 0.56469 |         | 0.48753 |
| 0.5     | 0.4992  | 0.5     | 0.49797 | 0.56633 |         | 0.59769 |
| 0.58686 | 0.55265 | 0       | 0       | 0       | 0       | 0       |
| 0       | 0       | 0       | 0       | 0       | 0       | 0       |
| 0       | 0       | 0       | 0       | 0       | 0       | 0       |
| 0       | 1       | 1       | 1       | 1       |         | 1       |
| 1       | 1       | 0.5     | 0.5     | 0.56291 |         | 0.5     |
| 0.41909 | 0.41318 | 0.51984 | 0.44027 | 0.41552 |         | 0.40136 |
| 0.57587 | 0       | 0       | 0       | 0       | 0       | 0       |
| 0       | 0       | 0       | 0       | 0       | 0       | 0       |
| 0       | 0       | 0       | 0       | 0       | 0       | 0       |
| 0       | 1       | 1       | 1       | 1       |         | 1       |
| 1       | 1       | 0.60451 | 0.51104 | 0.51318 |         | 0.53968 |
| 0.41091 | 0.65309 | 0.55629 |         | 0.5     | 0.5     | 0.47299 |
| 0.57633 | 0       | 0       | 0       | 0       | 0       | 0       |
| 0       | 0       | 0       | 0       | 0       | 0       | 0       |
| 0       | 0       | 0       | 0       | 0       | 0       | 0       |
| 0       | 0       | 1       | 1       | 1       |         | 1       |
| 1       | 1       | 1       | 0.54767 | 0.50274 |         | 0.52797 |
| 0.5     | 0.59098 | 0.628   | 0.46636 | 0.55845 |         | 0.5013  |
| 0.58436 | 0.5     | 0.36112 |         | 0       | 0       | 0       |
| 0       | 0       | 0       | 0       | 0       | 0       | 0       |
| 0       | 0       | 0       | 0       | 0       | 0       | 0       |
| 0       | 0       | 0       | 1       | 1       |         | 1       |
| 1       | 1       | 1       | 1       | 0.44402 |         | 0.48698 |
| 0.61569 | 0.5     | 0.40694 | 0.54537 | 0.54448 |         | 0.58099 |
| 0.44289 | 0.66326 | 0.54159 | 0.53522 |         | 0       | 0       |
| 0       | 0       | 0       | 0       | 0       | 0       | 0       |

|         |         |         |         |         |         |         |
|---------|---------|---------|---------|---------|---------|---------|
| 0       | 0       | 0       | 0       | 0       | 0       | 0       |
| 0       | 0       | 0       | 0       | 0       | 1       | 1       |
| 1       | 1       | 1       | 1       | 1       | 1       | 1       |
| 1       | 0.5     | 0.53525 | 0.49937 | 0.57492 |         | 0.5     |
| 0.49593 |         | 0.5     | 0.5     | 0.55226 | 0.64627 | 0.52485 |
| 0       | 0       | 0       | 0       | 0       | 0       | 0       |
| 0       | 0       | 0       | 0       | 0       | 0       | 0       |
| 0       | 0       | 0       | 0       | 0       | 0       | 0       |
| 1       | 1       | 1       | 1       | 1       | 1       | 1       |
| 1       | 1       | 1       |         | 0.5     | 0.31933 | 0.33775 |
| 0.30295 | 0.33231 | 0.30186 |         | 0.33333 | 0.34611 | 0.33333 |
| 0.37959 | 0.31851 |         | 0       | 0       | 0       | 0       |
| 0       | 0       | 0       | 0       | 0       | 0       | 0       |
| 0       | 0       | 0       | 0       | 0       | 0       | 0       |
| 0       | 0       | 1       | 1       | 1       | 1       | 1       |
| 1       | 1       | 1       | 1       | 1       | 1       | 0.51578 |
| 0.3406  | 0.33333 | 0.33919 | 0.33224 | 0.34193 |         | 0.31113 |
| 0.26853 | 0.32378 | 0.33327 | 0.36349 |         | 0       | 0       |
| 0       | 0       | 0       | 0       | 0       | 0       | 0       |
| 0       | 0       | 0       | 0       | 0       | 0       | 0       |
| 0       | 0       | 0       | 0       | 0       | 1       | 1       |
| 1       | 1       | 1       | 1       | 1       | 1       | 0.5     |
| 0.45485 | 0.37746 | 0.32904 | 0.28992 | 0.33333 |         | 0.36744 |
| 0.39777 | 0.36975 | 0.40238 |         | 0.3638  | 0.35769 | 0.3547  |
| 0       | 0       | 0       | 0       | 0       | 0       | 0       |
| 0       | 0       | 0       | 0       | 0       | 0       | 0       |
| 0       | 0       | 0       | 0       | 0       | 0       | 0       |
| 1       | 1       | 1       | 1       | 1       | 1       | 1       |
| 0.5     | 0.3608  | 0.5356  | 0.69414 | 0.5     |         | 0.26359 |
| 0.29535 |         | 0.3872  | 0.2693  | 0.33333 | 0.39652 | 0.38577 |
| 0.36308 | 0.35904 |         | 0       | 0       | 0       | 0       |
| 0       | 0       | 0       | 0       | 0       | 0       | 0       |
| 0       | 0       | 0       | 0       | 0       | 0       | 0       |
| 0       | 0       | 1       | 1       | 1       | 1       | 1       |
| 1       | 0.5     | 0.46644 | 0.5     | 0.53497 |         | 0.5     |
| 0.5     | 0.31841 | 0.35918 | 0.33333 | 0.33333 |         | 0.32075 |
| 0.36659 | 0.36757 | 0.27463 |         | 0.36978 | 0       | 0       |
| 0       | 0       | 0       | 0       | 0       | 0       | 0       |
| 0       | 0       | 0       | 0       | 0       | 0       | 0       |
| 0       | 0       | 0       | 0       | 0       | 1       | 1       |
| 1       | 0.41098 | 0.53961 | 0.50255 | 0.43773 |         | 0.53326 |
| 0.5     | 0.4926  | 0.48614 | 0.37506 | 0.28409 |         | 0.35283 |
| 0.33333 | 0.23931 | 0.30897 | 0.27971 | 0.27139 |         | 0.33549 |
| 0       | 0       | 0       | 0       | 0       | 0       | 0       |
| 0       | 0       | 0       | 0       | 0       | 0       | 0       |
| 0       | 0       | 0       | 0       | 0       | 0       | 0       |
| 1       | 0.5     | 0.50144 | 0.60907 | 0.62748 |         | 0.47447 |
| 0.47509 | 0.53459 | 0.50261 | 0.50448 | 0.37952 |         | 0.41068 |
| 0.35234 | 0.32175 | 0.34295 | 0.31811 | 0.35653 |         | 0.36552 |
| 0.32615 |         | 0       | 0       | 0       | 0       | 0       |
| 0       | 0       | 0       | 0       | 0       | 0       | 0       |
| 0       | 0       | 0       | 0       | 0       | 0       | 0       |







0  
0.07155  
0.10366  
0.11432  
0.11389  
0.10824  
0.10059  
0.092638  
0.085208  
0.078648  
0.073046  
0.06836  
0.06449  
0.06132  
0.058731  
0.05662  
0.054894  
0.053478

gtTCs=

0  
0.07155  
0.116  
0.14393  
0.16177  
0.17342  
0.18126  
0.18671  
0.19067  
0.19366  
0.19601  
0.19792  
0.19952  
0.20088  
0.20206  
0.20309  
0.20398  
0.20476

gtTCp=

0  
2.385  
1.5979  
1.1196  
0.8287  
0.65143  
0.54309  
0.47655  
0.43538  
0.4096  
0.39316  
0.38239

0.37506  
0.36982  
0.36585  
0.36266  
0.35995  
0.35753

X\_mask=

3.4884e-006,0.00044924,0.00044134,2.2204e-016,2.2204e-016,0.00073602,0.0001353,2.2204e-016,0.00034075,0.00038145,0.00032156,2.2204e-016,0.00025396,0.00068856,2.2204e-016,0.00038344,2.2204e-016,2.2204e-016,0.0006038,2.2204e-016,0.0041082,2.2204e-016,0.0025854,0.0012658,0.0002949,2.2204e-016,2.2204e-016,0.00028977,2.2204e-016,0.00068612,0.00097969,2.2204e-016,2.2204e-016,2.2204e-016,0.00076182,0.00030883,2.2204e-016,0.0043199,2.2204e-016,2.2204e-016,2.2204e-016,2.2204e-016,2.2204e-016,0.00016136,0.00059284,2.2204e-016,2.2204e-016,0.00092861,2.2204e-016,6.7177e-005,2.2204e-016,2.2204e-016,2.2204e-016,2.2204e-016,0.00053311,2.2204e-016,2.2204e-016,0.0012008,2.2204e-016,2.2204e-016,0.0012827,2.2204e-016,0.0078569,2.2204e-016,2.2204e-016,2.2204e-016,0.0014638,0.0015729,0.00034619,0.00093581,0.0010491,2.2204e-016,0.00037037,2.2204e-016,0.00062269,2.2204e-016,2.2204e-016,2.2204e-016,0.00055703,6.8809e-005,0.00019239,0.00032171,0.00040926,2.2204e-016,2.2204e-016,2.2204e-016,0.0018926,2.2204e-016,0.0025917,2.2204e-016,2.2204e-016,0.00081974,0.001805,0.0019616,2.2204e-016,2.2204e-016,0.00050855,0.00025252,2.0531e-005,2.2204e-016,2.2204e-016,2.2204e-016,0.00057023,2.2204e-016,2.2204e-016,0.00040869,8.4154e-005,3.5505e-005,0.0012805,2.2204e-016,0.00030399,2.2204e-016,0.00093024,0.0051633,0.0032936,2.2204e-016,0.00020104,2.2204e-016,0.0016132,0.0012762,0.0039043,2.2204e-016,0.0010202,2.2204e-016,2.2204e-016,0.00024071,2.2204e-016,2.2204e-016,5.698e-005,2.2204e-016,0.00030534,0.00038723,5.0031e-005,6.3027e-005,0.00011797,2.2204e-016,0.00024116,2.2204e-016,2.2204e-016,1.2968e-005,2.2204e-016,2.2204e-016,0.0016916,0.0037389,2.2204e-016,2.2204e-016,0.0033421,0.0019111,2.2204e-016,0.0034709,2.2204e-016,0.0013825,0.0058213,2.2204e-016,0.00035463,2.2204e-016,2.2204e-016,2.2204e-016,0.0004251,2.2204e-016,0.00054945,0.00050982,2.2204e-016,0.00012031,0.00038128,0.00081199,2.2204e-016,0.00019073,0.00022708,0.00011342,2.2204e-016,0.00023326,0.00014827,0.00031178,2.2204e-016,2.2204e-016,2.2204e-016,2.2204e-016,0.00096967,0.0012225,2.2204e-016,2.2204e-016,0.00017222,2.2204e-016,0.0011207,0.0069471,2.2204e-016,2.2204e-016,2.2204e-016,0.00040279,2.2204e-016,0.0011423,2.2204e-016,0.00060027,2.2204e-016,0.00046469,2.2204e-016,0.00031252,0.0003221,2.2204e-016,2.2204e-016,2.2204e-016,0.00076329,9.6879e-005,0.00054146,2.2204e-016,7.8116e-005,0.00045828,0.0030453,2.2204e-016,0.0024178,0.0080559,0.0044865,0.0074759,2.2204e-016,2.2204e-016,2.2204e-016,0.00090346,0.0030378,0.00079143,5.9872e-006,2.2204e-016,0.0047141,0.00101,0.0010209,0.00071705,2.2204e-016,2.2204e-016

016,0.00044299,2.2204e-016,2.2204e-016,2.2204e-016,2.2204e-  
016,2.2204e-016,0.00040456,2.2204e-016,0.00016698,2.2204e-  
016,0.00010769,2.2204e-016,0.0004884,0.00050066,0.0004126,2.2204e-  
016,2.2204e-016,0.012491,0.0048756,0.0025456,2.2204e-016,2.2204e-  
016,2.2204e-016,0.00021839,0.0016954,2.2204e-016,2.2204e-016,9.8419e-  
005,2.2204e-016,2.2204e-016,2.2204e-  
016,0.0044178,0.00075908,0.0039708,2.2204e-016,2.2204e-  
016,0.00033552,2.2204e-016,0.00058655,0.00035013,2.2204e-016,2.2204e-  
016,0.00011458,2.2204e-016,2.2204e-016,2.2204e-016,2.2204e-  
016,0.00019906,0.0004941,2.2204e-016,6.553e-005,2.2204e-  
016,0.00065597,0.0090775,2.2204e-016,2.2204e-016,2.2204e-  
016,0.00092544,2.2204e-016,0.0016536,0.0032096,2.2204e-016,2.2204e-  
016,0.0031921,2.2204e-016,4.6789e-005,0.0057189,2.2204e-016,2.2204e-  
016,2.2204e-016,0.0032404,0.0011337,2.2204e-016,0.00069774,2.2204e-  
016,8.9534e-005,0.00037533,2.2204e-016,2.844e-005,2.2204e-  
016,0.00018812,7.3697e-005,2.2204e-016,0.00010956,2.2204e-  
016,0.00035753,9.7038e-  
005,0.0001339,0.00071954,0.00052966,0.0016888,2.2204e-016,2.2204e-  
016,2.2204e-016,0.0048909,0.00073524,0.011361,0.0041031,2.2204e-  
016,0.00019347,0.00037065,2.2204e-016,2.2204e-016,0.0015542,2.2204e-  
016,0.00097422,0.0081449,0.0010549,2.2204e-  
016,0.00023136,0.00026268,2.2204e-016,2.2204e-016,2.2204e-  
016,0.00040084,2.2204e-016,0.00012501,0.00018556,2.1476e-  
005,0.00063059,2.2204e-016,2.2204e-016,2.2204e-016,2.2204e-  
016,0.00012511,2.2204e-016,2.2204e-016,2.2204e-016,0.0040828,2.2204e-  
016,2.2204e-016,2.2204e-016,2.2204e-016,2.2204e-  
016,0.0062907,0.0079013,2.2204e-016,0.0025232,2.2204e-  
016,0.0034067,0.00010173,2.2204e-016,2.2204e-016,2.2204e-016,2.2204e-  
016,0.00030113,2.2204e-016,2.2204e-016,2.2204e-016,0.00042382,2.2204e-  
016,2.2204e-016,2.2204e-016,2.2204e-016,2.2204e-016,9.844e-  
005,2.2204e-016,0.00054613,2.2204e-016,2.2204e-016,2.2204e-  
016,0.00013891,2.2204e-016,0.00079112,0.00042315,2.2204e-016,2.2204e-  
016,0.0029342,3.9666e-  
005,0.0051733,0.002712,0.0021208,0.0038294,2.2204e-016,2.2204e-  
016,2.2204e-016,0.00010165,2.2204e-016,2.2204e-016,2.2204e-  
016,0.00011655,0.000856,2.9608e-005,2.2204e-  
016,0.0016889,0.00042199,4.1366e-006,0.00021243,2.2204e-016,2.2204e-  
016,2.2204e-016,2.2204e-016,2.2204e-016,0.00035083,2.2204e-  
016,0.0005589,0.00010623,0.00020582,2.2204e-  
016,0.0003709,0.00065188,0.00014275,2.2204e-  
016,0.0063931,0.0010504,2.2204e-016,2.2204e-  
016,0.0011122,0.0073953,2.2204e-016,2.2204e-016,2.2204e-016,2.2204e-  
016,0.0013517,0.0035961,0.0010329,2.2204e-016,0.0042806,2.2204e-  
016,0.0036328,0.00084126,2.2204e-016,3.2817e-005,0.00041599,2.2204e-  
016,2.2204e-016,2.2204e-016,2.2204e-016,2.2204e-016,2.2204e-  
016,0.00012844,0.00027312,5.3882e-005,0.00037682,2.2204e-016,2.2204e-  
016,7.836e-005,2.2463e-005,2.2204e-016,2.2204e-016,2.2204e-  
016,2.2204e-016,0.0020721,0.0026567,0.0037837,2.2204e-  
016,0.0031271,2.2204e-016,2.2204e-016,2.2204e-016,0.0012977,2.2204e-  
016,2.2204e-016,0.0014227,0.0010146,2.2204e-016,0.00093252,2.2204e-  
016,2.2204e-016,2.2204e-016,2.2204e-016,0.00018916,2.2204e-  
016,0.00031276,2.2204e-016,0.00025698,0.00054959,2.2204e-016,4.9657e-

005,0.00058785,0.00026558,0.00051152,7.7086e-005,2.2204e-016,7.5962e-005,0.00019871,2.2204e-016,0.00022308,2.2204e-016,0.0043399,0.0019582,0.00010752,2.2204e-016,0.0024011,2.2204e-016,0.0026434,0.0028116,0.0057922,2.2204e-016,0.0018496,0.0024176,2.2204e-016,0.0026106,2.2204e-016,0.0015536,2.2204e-016,2.2204e-016,0.0044748,2.2204e-016,5.1167e-005,2.2204e-016,2.2204e-016,2.2204e-016,4.0745e-006,2.2204e-016,2.2204e-016,0.000299,2.2204e-016,2.2204e-016,0.00032173,2.2204e-016,0.00057472,2.0725e-005,2.2204e-016,0.00018754,7.6909e-005,2.2204e-016,0.00064995,0.0016555,2.2204e-016,0.002644,0.0084117,2.2204e-016,2.2204e-016,0.0024867,0.0017054,2.2204e-016,0.0035758,2.2204e-016,0.0034884,2.2204e-016,2.2204e-016,2.2204e-016,0.0039159,2.2204e-016,0.0025583,2.2204e-016,3.2172e-005,2.2204e-016,1.706e-005,2.2204e-016,0.00057737,0.00026153,7.3555e-006,2.2204e-016,2.2204e-016,0.00027497,2.2204e-016,0.00043225,2.2204e-016,2.2204e-016,2.2204e-016,0.00026873,2.2204e-016,2.2204e-016,0.00072757,2.2204e-016,0.006564,0.00043551,2.2204e-016,0.0020297,2.2204e-016,2.2204e-016,2.2204e-016,2.2204e-016,2.2204e-016,2.2204e-016,0.00025029,2.2204e-016,0.0037498,0.00039374,0.0020462,2.2204e-016,2.2204e-016,1.285e-005,2.2204e-016,0.00022794,6.0168e-005,2.2204e-016,2.2204e-016,0.00012758,2.2204e-016,2.2204e-016,3.908e-005,2.2204e-016,2.2204e-016,2.2204e-016,0.00026756,1.266e-005,0.00048599,2.2204e-016,2.2204e-016,2.2204e-016,2.2204e-016,2.2204e-016,0.0018082,0.0010585,0.0079103,0.0060932,2.2204e-016,0.00080563,0.0014462,2.2204e-016,2.2204e-016,2.2204e-016,2.2204e-016,0.0031232,2.2204e-016,2.2204e-016,2.2204e-016,2.2204e-016,2.2204e-016,2.2204e-016,2.2204e-016,2.2204e-016,0.00053982,2.2204e-016,2.2204e-016,5.9323e-006,2.2204e-016,2.2204e-016,2.2204e-016,2.2204e-016,0.00042044,2.2204e-016,2.2204e-016,2.2204e-016,2.2204e-016,2.2204e-016,1.7357e-005,2.2204e-016,0.0022304,2.2204e-016,0.0025421,2.2204e-016,0.002929,2.2204e-016,0.0014554,2.2204e-016,2.2204e-016,2.2204e-016,2.2204e-016,2.2204e-016,0.0019269,0.0033245,0.00034547,0.001281,2.2204e-016,0.00076158,0.0019006,0.00011799,0.00014372,0.00037853,0.00025493,8.6467e-005,0.00027979,2.2204e-016,2.2204e-016,2.2204e-016,2.2204e-016,9.4901e-005,2.2204e-016,8.3699e-005,0.00013355,2.2204e-016,2.2204e-016,2.2204e-016,0.00030027,2.2204e-016,0.00064997,0.0046878,0.0041981,0.0017096,5.5943e-005,0.0012087,0.002161,0.0045952,0.0019002,0.0045897,0.00049328,0.0011999,9.9903e-005,0.00041873,2.2204e-016,0.0018173,0.0017138,2.2204e-016,2.2204e-016,2.2204e-016,0.00060664,1.4128e-006,2.2204e-016,0.00033586,2.2204e-016,5.7284e-005,0.00030148,2.9442e-005,0.00047942,2.2204e-016,2.2204e-016,2.2204e-016,3.9274e-005,2.2204e-016,0.00017391,2.2204e-016,2.2204e-016,2.2204e-016,2.2204e-016,0.0018371,0.0023636,0.0018362,2.2204e-016,0.0010025,2.2204e-016,2.2204e-016,2.2204e-016,0.00083533,2.2204e-016,0.0012174,3.0674e-005,0.00025478,2.2204e-016,0.0012437,2.2204e-016,0.00071035,0.00092584,2.2204e-016,0.0001655,6.1184e-007,0.00044017,2.2204e-016,0.00010236,2.2204e-016,2.2204e-016,0.00018854,0.00010818,2.9647e-005,2.2204e-016,0.00039242,2.2204e-016,2.6818e-005,2.6011e-006,0.00023243,0.00036888,0.00020657,5.2534e-005,0.0042533,2.2204e-016,2.2204e-016,2.2204e-016,2.2204e-016,2.2204e-016

016,0.0020529,0.0024036,0.0054706,0.0035546,0.00033442,0.0021729,0.000  
97989,2.2204e-016,0.0014483,0.00063856,0.00036566,1.9003e-005,6.039e-  
005,3.7312e-005,0.00098735,0.00027994,0.00039902,7.0557e-  
007,0.00033577,2.2204e-016,0.00033417,2.2204e-016,2.2204e-016,2.2204e-  
016,0.00044713,0.00013302,2.2204e-016,0.00027869,2.2204e-016,2.2204e-  
016,0.00014799,2.2204e-016,2.2204e-016,0.0023332,0.00089826,2.2204e-  
016,2.2204e-016,2.2204e-016,0.0065426,2.2204e-  
016,0.0031464,0.0011815,2.2204e-  
016,0.00016475,0.00052443,0.00022158,7.7565e-005,2.2204e-  
016,0.00036811,0.00011868,0.00037276,2.2204e-  
016,0.00024659,0.00018235,0.00054825,2.2204e-016,2.2204e-  
016,0.00023268,0.00022199,2.2204e-016,2.2204e-016,0.0002142,2.2204e-  
016,2.2204e-016,2.2204e-016,0.00020039,0.00043804,2.2204e-  
016,0.00023962,2.2204e-016,0.00037647,0.003744,2.2204e-  
016,0.005222,2.2204e-016,2.2204e-016,0.0037716,2.2204e-016,2.2204e-  
016,0.00017555,0.00026612,0.00017926,7.2636e-005,0.00038657,2.2204e-  
016,2.2204e-016,3.5527e-005,0.00018852,0.00042228,1.2682e-005,2.2204e-  
016,2.2204e-016,0.00011399,2.2204e-016,0.00013475,2.2204e-016,2.2204e-  
016,0.00027049,2.2204e-016,0.00027736,2.2204e-016,8.8831e-005,2.2204e-  
016,2.2601e-006,2.839e-  
005,0.00025916,0.0002647,0.0018646,0.00252,2.2204e-016,2.2204e-  
016,0.00062345,2.2204e-016,0.00028259,2.2204e-016,2.2204e-016,2.2204e-  
016,2.2204e-016,2.2204e-016,0.00045678,2.2204e-016,0.00013351,2.2204e-  
016,2.2204e-016,2.2204e-016,2.2204e-016,0.00012196,2.2204e-  
016,0.00011318,7.8592e-005,2.2204e-016,2.2204e-  
016,0.00050411,0.00047255,2.2204e-016,0.00025569,0.00014721,9.5237e-  
005,2.2204e-016,2.2204e-016,0.0001681,2.2204e-016,0.00020557,2.2204e-  
016,0.00010111,2.2204e-016,0.0032769,0.00015499,2.2204e-016,2.2204e-  
016,4.2818e-005,2.2204e-016,0.00031188,2.2204e-016,2.2204e-  
016,8.7196e-006,1.8592e-006,8.5274e-007,5.4694e-  
005,0.00018753,2.2204e-016,2.2204e-016,6.9618e-005,0.00019076,2.2204e-  
016,2.2204e-016,0.0001414,0.00010967,0.00016899,2.2204e-  
016,0.00015127,5.4787e-005,2.2204e-016,0.00053651,2.2204e-016,2.2204e-  
016,0.00047967,2.2204e-016,0.00014945,8.0643e-005,2.2204e-016,2.2204e-  
016,2.2204e-016,0.00022176,0.00016886,0.00040988,0.00031495,2.2204e-  
016,2.2204e-016,0.00023959,0.00010182,0.00048003,2.2204e-016,2.2204e-  
016,0.00042574,1.6572e-005,2.2204e-  
016,0.00014155,0.00022288,0.00036205,6.5488e-005,2.2204e-016,2.2204e-  
016,2.2204e-016,2.2204e-016,2.2204e-016,2.2204e-016,2.2204e-  
016,5.0397e-005,2.2204e-016,2.2204e-016,0.00022078,2.2204e-  
016,0.0002377,2.2204e-016,0.00026706,0.00016651,0.00042351,3.6029e-  
005,2.2204e-016,0.00058186,2.2204e-016,0.00016963,2.2204e-  
016,0.00045719,2.2204e-016,0.00034431,0.00044978,2.2204e-  
016,0.00037976,9.8043e-005,2.2204e-016,0.00034044,2.2204e-016,2.2204e-  
016,2.2204e-016,0.00017679,2.2204e-016,2.2204e-016,1.1194e-  
005,4.8099e-005,2.2204e-016,2.2204e-016,2.2204e-016,2.2204e-  
016,2.2204e-016,2.2204e-016,9.5547e-005,2.2204e-  
016,0.00037976,0.00034854,4.0472e-005,0.0001993,2.2204e-  
016,0.00010518,0.00014204,0.00078449,0.00033482,2.2204e-  
016,0.00046834,0.00038878,0.0007424,0.00063808,0.00031004,0.00021955,0  
.00012522,9.3383e-005,2.2204e-016,9.583e-006,0.00011669,8.5306e-  
005,2.2204e-016,0.00022178,2.2204e-016,0.00037747,2.2204e-016,2.2204e-

016,0.00038307,0.00040122,2.517e-005,0.00028228,2.2204e-016,2.2204e-016,0.00020049,0.0005651,0.00010746,2.2204e-016,2.2204e-016,2.2204e-016,0.00019848,2.2204e-016,2.2204e-016,0.00015682,2.2204e-016,2.2204e-016,0.00021011,0.00017328,0.00037796,2.2204e-016,5.8238e-006,2.2204e-016,2.2204e-016,2.2204e-016,0.00034196,2.2204e-016,0.00013319,2.2204e-016,0.0004026,2.2204e-016,0.00036335,2.2204e-016,2.2204e-016,9.6427e-005,2.2204e-016,0.00036026,9.5882e-005,2.2204e-016,2.2204e-016,2.2204e-016,2.2204e-016,2.0136e-005,0.00022524,2.2204e-016,0.00023229,8.367e-005,2.2204e-016,2.2204e-016,7.7199e-005,0.00034,0.00023592,9.6665e-005,2.2204e-016,0.00034126,2.2204e-016,0.0002494,2.2204e-016,0.00032416,2.2204e-016,0.00026864,2.2204e-016,2.2204e-016,0.00032287,0.00012997,0.00042494,2.2204e-016,2.2204e-016,2.2204e-016,2.2204e-016,0.00038049,2.2204e-016,0.00023408,2.2204e-016,0.00013889,2.2204e-016,0.0005769,2.2204e-016,6.1111e-005,2.2204e-016,0.00011496,2.2204e-016,2.2204e-016,2.2204e-016,2.2204e-016,0.00028329,2.6368e-005,2.2204e-016,0.00027295,0.00036435,9.8515e-005,5.2988e-005,2.2204e-016,2.2204e-016,2.2204e-016,7.4946e-005,2.2204e-016,0.00069446,2.2204e-016,2.2204e-016,2.2204e-016,0.00056021,2.2204e-016,0.00019923,0.00013041,0.00027304,0.00021054,0.00016635,2.2204e-016,0.00012672,2.2204e-016,2.5113e-005,2.2204e-016,1.6912e-005,2.2204e-016,4.3475e-006,7.7531e-006,0.00047996,3.0965e-005,6.9488e-005,2.2204e-016,0.00014794,2.2204e-016,1.2493e-005,0.00015261,2.2204e-016,2.2204e-016,0.00025783,2.2204e-016,9.0315e-005,0.0006352,0.00015965,0.00020836,2.2204e-016,2.2204e-016,2.2204e-016,2.2204e-016,2.2204e-016,0.00021162,0.00023886,2.2204e-016,0.0001034,0.00029744,0.0001191,2.2204e-016,0.00054636,2.2204e-016,0.00049811,2.2204e-016,0.00021365,2.2204e-016,2.2204e-016,2.2204e-016,1.7702e-005,2.2204e-016,0.00015654,0.00019894,2.2204e-016,0.00015924,8.6877e-005,2.2204e-016,2.2204e-016,2.2204e-016,2.2204e-016,0.00026918,0.00073106,2.2204e-016,0.00021572,0.00045548,0.00025748,5.3711e-005,2.2204e-016,2.2204e-016,2.2204e-016,2.2204e-016,2.2204e-016,2.2204e-016,0.00030089,0.00054389,8.5479e-005,0.00014312,2.2204e-016,0.00042042,6.6172e-005,2.2204e-016,0.00050461,4.5826e-005,7.9263e-005,6.3393e-005,8.2188e-005,0.00027254,2.2204e-016,2.2204e-016,2.2204e-016,2.2204e-016,0.00030437,2.2204e-016,2.2204e-016,2.2204e-016,8.9235e-005,0.00023036,7.4465e-006,2.2204e-016,2.2204e-016,0.00038516,2.2204e-016,2.2204e-016,2.2204e-016,2.2204e-016,2.2204e-016

0.071567,0.071964,0.072056,0.071198,0.070608,0.072482,0.071249,0.070371,0.071819,0.072134,0.071571,0.07142,0.071873,0.072132,0.071052,0.072103,0.070775,0.071607,0.071131,0.071998,1.1552,1.4194,1.2762,1.1802,0.072566,0.07211,0.071462,0.071418,0.07144,0.071117,0.07189,0.072764,0.071145,0.071121,0.07151,0.071332,0.072276,0.071593,0.070773,2.3896,1.229,1.4476,1.2104,1.1501,1.2853,1.2653,0.071961,0.072101,0.070983,0.071348,0.072622,0.071095,0.072078,0.071399,0.07079,0.070853,0.071515,0.072438,0.071448,0.071555,0.072258,2.3833,2.3786,1.1381,0.81248,1.236,0.91238,1.2103,1.267,1.2025,1.2184,0.071578,0.072372,0.071973,0.071237,0.071712,0.071178,0.072125,0.071072,0.070769,0.071358,0.071707,0.071277,0.071607,0.07134,0.071852,2.3785,2.3789,2.3879,1.2135,1.4356,1.0994,1.2473,1.2282,1.2295,1.3195,1.262,1.3157,0.071672,0.071882,0.071902,0.0713

03,0.071094,0.070794,0.071006,0.07219,0.069735,0.070788,0.072499,0.071857,0.071522,0.072773,0.071563,0.072106,2.3861,2.3896,2.3908,2.3889,1.4045,1.3501,1.1637,1.3896,1.1599,0.98213,1.3004,1.2581,0.92001,1.0914,0.071953,0.071172,0.07105,0.071733,0.071524,0.07192,0.071751,0.071466,0.071829,0.071727,0.0702,0.071995,0.070388,0.07074,0.071669,0.071538,2.3815,2.3855,2.3884,2.3787,2.3849,2.3859,1.2285,1.2798,1.1225,1.3328,1.2053,1.3766,1.4898,1.2637,1.7111,1.2259,0.071189,0.071932,0.071271,0.072225,0.07173,0.071105,0.071922,0.071729,0.072115,0.071175,0.0719,0.072174,0.071453,0.071485,0.071171,0.071609,0.072178,2.3756,2.3753,2.3746,2.3797,2.3862,2.3883,1.2675,1.3773,1.1992,1.2279,1.2266,1.2351,1.2206,1.3795,1.4562,1.4288,1.3465,0.072697,0.070985,0.072525,0.070927,0.071807,0.071423,0.072055,0.071793,0.071086,0.071329,0.071185,0.07251,0.071463,0.07198,0.071321,0.071623,0.071577,2.3883,2.3737,2.3851,2.389,2.389,2.3908,2.3843,1.2277,1.2238,1.3748,1.2326,1.0431,1.0265,1.2712,1.0929,1.0329,1.0021,1.403,0.070485,0.07065,0.072196,0.070243,0.070008,0.071458,0.071656,0.070923,0.071785,0.070767,0.071815,0.07156,0.071707,0.071228,0.071892,0.071572,0.071737,0.070521,2.3838,2.3999,2.3909,2.3857,2.3782,2.3718,2.3836,1.4693,1.2538,1.2584,1.3207,1.0229,1.5795,1.3543,1.2268,1.2317,1.1684,1.4089,0.071201,0.070647,0.072096,0.071291,0.071926,0.0715,0.071481,0.070417,0.071698,0.070882,0.071279,0.071316,0.071004,0.071609,0.071911,0.071626,0.071759,0.071234,0.072036,2.3937,2.3846,2.3782,2.3839,2.3837,2.3798,2.3887,1.3413,1.2344,1.2893,1.2305,1.4353,1.5247,1.156,1.3629,1.2294,1.4208,1.234,0.90808,0.072181,0.072187,0.071604,0.0716,0.072082,0.070997,0.071828,0.0711,0.071828,0.071375,0.071336,0.071805,0.071319,0.071957,0.071735,0.072016,0.07226,0.071971,2.388,2.3834,2.3826,2.3808,2.3912,2.3848,2.3928,1.1026,1.195,1.4948,1.2284,1.0096,1.3305,1.3326,1.4127,1.097,1.6114,1.3268,1.3074,0.071552,0.071869,0.071564,0.070812,0.071254,0.072023,0.071062,0.071562,0.071537,0.071467,0.072083,0.07151,0.071453,0.07142,0.071397,0.071486,0.071591,0.071174,2.3864,2.3829,2.3835,2.3838,2.3844,2.3904,2.3863,2.3927,2.3926,1.2275,1.3119,1.226,1.4051,1.2302,1.2186,1.2277,1.2262,1.3495,1.5671,1.2832,0.071477,0.071463,0.072384,0.071464,0.071319,0.070901,0.071137,0.071144,0.071793,0.071283,0.071824,0.071597,0.071787,0.071278,0.071923,0.071782,0.072332,0.071803,2.3831,2.3804,2.3907,2.3856,2.3894,2.389,2.3861,2.3859,2.3755,1.2293,0.81108,0.85215,0.77088,0.84077,0.7702,0.8426,0.87291,0.84287,0.94853,0.81106,0.072006,0.071422,0.071869,0.071226,0.071143,0.071488,0.070841,0.071465,0.072072,0.071069,0.071767,0.071888,0.071674,0.071296,0.072116,0.072293,0.071836,0.071795,2.3935,2.386,2.3849,2.3776,2.3854,2.3882,2.3861,2.3751,2.3816,1.2633,0.86123,0.8447,0.85835,0.84026,0.86694,0.79072,0.69604,0.82101,0.8411,0.91311,0.072142,0.071503,0.070906,0.071536,0.071293,0.071745,0.071314,0.071822,0.071886,0.071512,0.071761,0.071381,0.071575,0.071688,0.071626,0.071425,0.070925,0.070655,2.3899,2.3878,2.3842,2.3871,2.3817,2.386,2.375,1.226,1.1233,0.94633,0.83359,0.7397,0.84378,0.92275,0.99254,0.928,1.0033,0.91399,0.89861,0.89064,0.071928,0.071257,0.071777,0.071456,0.071902,0.072171,0.071441,0.072047,0.072053,0.071476,0.071749,0.071725,0.071337,0.071616,0.072002,0.071013,0.071652,0.071502,2.3932,2.3853,2.3815,2.3877,2.3867,2.3825,1.2304,0.90719,1.3161,1.6752,1.2291,0.68329,0.75251,0.97,0.69386,0.84465,0.98879,0.9614,0.91602,0.90222,0.071529,0.071412,0.071614,0.07114,0.071405,0.071315,0.070984,0.071765,0.071508,0.071275,0.071594,0.071519,0.072176,0.071417,0.07117,0.071747,0.071664,0.071636,2.3838,2.3827,2.3852,2.3919,2.3972,1.228,1.1481,1.2291,1.3088,1.2265,1



.2294,0.80587,0.90579,0.84016,0.84145,0.81165,0.92243,0.91872,0.7093,0.92508,0.071609,0.071473,0.071524,0.070981,0.071879,0.071609,0.071697,0.071321,0.071205,0.071896,0.071672,0.072032,0.071473,0.07168,0.070836,0.071827,0.071707,0.071323,2.3836,2.3825,2.3876,1.0245,1.3178,1.2361,1.0827,1.304,1.2255,1.2073,1.1958,0.93764,0.72962,0.88525,0.84271,0.62538,0.78926,0.71801,0.70072,0.84551,0.071332,0.07164,0.071287,0.071863,0.071713,0.071524,0.071279,0.071781,0.071363,0.071122,0.071406,0.071406,0.071352,0.071451,0.071892,0.071933,0.071946,0.07167,2.3845,1.2275,1.2276,1.4808,1.5162,1.1705,1.1698,1.3156,1.241,1.2387,0.9508,1.0223,0.88513,0.81639,0.86221,0.81056,0.89198,0.91617,0.82526,0.071183,0.071579,0.070388,0.071666,0.071376,0.072054,0.071283,0.071385,0.07161,0.071075,0.071382,0.071464,0.071907,0.071279,0.07166,0.070912,0.071201,0.071666,1.2795,1.2298,1.34,1.2302,1.0746,1.1099,1.2321,1.0904,1.1624,1.4242,0.84237,0.8846,0.90924,0.97113,0.84356,0.79655,0.96343,0.95178,0.79026,0.071762,0.071717,0.071998,0.071642,0.071699,0.071741,0.071649,0.071303,0.071516,0.071461,0.071289,0.071187,0.071853,0.071611,0.071397,0.071912,0.071102,0.072146,1.4212,1.4436,1.205,1.0578,1.0142,1.1714,1.239,1.2302,1.2325,1.2297,0.8286,0.84228,0.79205,0.80459,0.77239,0.8448,0.6928,0.78675,0.071319,0.071994,0.07146,0.071829,0.071962,0.071158,0.071587,0.071894,0.071535,0.072092,0.071471,0.07148,0.071329,0.071686,0.071259,0.071624,0.071439,0.071427,0.071421,1.0305,1.331,1.4515,1.2239,1.2285,1.2285,1.3101,1.2455,1.086,1.2253,0.7941,0.94906,0.88881,0.87215,0.81333,0.86454,0.88233,0.94144,0.0715,0.071677,0.071719,0.07183,0.071035,0.0717,0.071224,0.07136,0.071795,0.07137,0.071675,0.071206,0.071935,0.071466,0.071532,0.071786,0.071657,0.071815,0.07175,0.071608,0.80756,1.2289,1.0919,1.2253,1.0259,1.2318,1.1979,1.3297,1.3489,0.98523,0.67719,0.73161,0.78478,0.81013,0.85201,0.071872,0.071282,0.071708,0.071498,0.07244,0.071741,0.071936,0.071385,0.072004,0.071393,0.071778,0.071201,0.07128,0.071491,0.072333,0.071545,0.070891,0.07173,0.071686,0.071384,0.071764,0.071474,1.2252,1.0581,1.2727,1.2277,1.227,1.2274,1.3194,1.2119,1.2318,0.78044,0.85058,0.72308,0.071953,0.071852,0.071416,0.071438,0.071842,0.071249,0.071949,0.071348,0.071761,0.071641,0.071969,0.07118,0.071411,0.071562,0.071694,0.071131,0.071185,0.071866,0.071257,0.071561,0.070847,0.071715,0.07187,0.071455,0.071713,0.071045,1.0657,0.90828,1.3368,1.22,1.1856,1.2566,1.4019,1.2279,0.071374,0.071842,0.071654,0.071722,0.071812,0.071716,0.070921,0.07147,0.071769,0.071511,0.0718,0.071453,0.071345,0.071192,0.071693,0.071418,0.071544,0.071513,0.071746,0.071764,0.071557,0.072027,0.071408,0.071577,0.071112,0.071449,0.071514,0.071685,0.071915,1.5208,1.2077,1.2301,1.4178,1.3515,0.071379,0.072066,0.071008,0.070878,0.071673,0.071319,0.070672,0.071835,0.071542,0.071844,0.071548,0.07115,0.0715,0.071455,0.071513,0.071484,0.071743,0.071652,0.071315,0.071666,0.072033,0.07202,0.071461,0.071709,0.071624,0.071583,0.071529,0.071139,0.071713,0.071415,0.071907,0.071527,0.071606,1.2698,1.2254,0.071746,0.071447,0.071238,0.071586,0.070592,0.072041,0.071172,0.071241,0.071729,0.071719,0.071611,0.071616,0.071499,0.071185,0.071107,0.07162,0.071503,0.071556,0.071433,0.071577,0.071556,0.07185,0.07154,0.071812,0.071674,0.07142,0.072091,0.071171,0.071208,0.071975,0.071595,0.071584,0.071564,0.071391,0.071467,0.071243,0.071866,0.071496,0.07185,0.071892,0.071565,0.071817,0.071695,0.071773,0.071918,0.071355,0.071244,0.072163,0.071578,0.071443,0.071725,0.072066,0.072113,0.071692,0.071476,0.071649,0.071209,0.071565,0.071358,0.071438,0.071281,0.071713,0.071594,0.071635,0.071949,0.071233,0.071742,0.071238,0.0717

27,0.071793,0.071966,0.07168,0.071682,0.072032,0.071514,0.071447,0.071521,0.072096,0.071264,0.071998,0.072186,0.070606,0.071913,0.071752,0.071318,0.071976,0.071357,0.071191,0.071401,0.071841,0.071287,0.071552,0.071598,0.071589,0.071524,0.07158,0.071467,0.071478,0.071296,0.071153,0.071388,0.071425,0.072081,0.071989,0.07163,0.071693,0.071672,0.071547,0.071915,0.072319,0.071889,0.071388,0.072061,0.071728,0.072144,0.071965,0.071863,0.071884,0.071757,0.071564,0.071477,0.071362,0.071594,0.071562,0.070912,0.071863,0.071492,0.071865,0.071398,0.071332,0.07174,0.071946,0.071534,0.071781,0.071573,0.071511,0.071594,0.071722,0.071433,0.071148,0.071306,0.071129,0.071566,0.071799,0.071394,0.071799,0.071826,0.07145,0.071841,0.071856,0.072094,0.071288,0.0714,0.071468,0.071559,0.07146,0.071892,0.071409,0.071586,0.071109,0.071826,0.070975,0.072052,0.070807,0.071603,0.071558,0.07125,0.071838,0.071615,0.071366,0.071423,0.070823,0.071534,0.071639,0.071563,0.071354,0.071765,0.071519,0.071602,0.071589,0.071552,0.071901,0.071728,0.071484,0.07137,0.072096,0.071495,0.071534,0.071199,0.071816,0.071125,0.071729,0.07122,0.071375,0.071679,0.071776,0.072121,0.071608,0.071491,0.071471,0.071282,0.071441,0.071873,0.071324,0.071646,0.071246,0.07146,0.071182,0.07205,0.071417,0.071496,0.071278,0.071435,0.071229,0.071558,0.071089,0.071601,0.071778,0.071546,0.071326,0.071984,0.071775,0.071591,0.071609,0.071439,0.071259,0.07153,0.071459,0.071548,0.072315,0.071216,0.07134,0.071291,0.072112,0.07115,0.071932,0.071546,0.071732,0.071639,0.071791,0.071725,0.071856,0.071258,0.071821,0.071219,0.071579,0.071208,0.071411,0.071511,0.072062,0.071426,0.071476,0.071626,0.071584,0.071307,0.071737,0.071535,0.070968,0.071069,0.071908,0.07178,0.071464,0.072092,0.071667,0.071908,0.071105,0.071219,0.071108,0.071611,0.071421,0.0713,0.071749,0.071746,0.07133,0.071697,0.071957,0.07168,0.07111,0.072044,0.071416,0.072072,0.071438,0.071648,0.071161,0.071197,0.071146,0.071486,0.071603,0.07161,0.071714,0.071567,0.071597,0.071578,0.071369,0.070978,0.071404,0.071437,0.071651,0.072324,0.07148,0.071679,0.07192,0.071971,0.071554,0.071202,0.071402,0.071033,0.071198,0.071529,0.07153,0.071772,0.071983,0.071675,0.071702,0.071249,0.071774,0.071559,0.071184,0.071955,0.071642,0.071634,0.071639,0.071613,0.071787,0.071603,0.07141,0.071252,0.071336,0.071753,0.070865,0.071395,0.071216,0.071418,0.071806,0.071632,0.071539,0.071646,0.071963,0.071354,0.071521,0.071271,0.07103  
0.11557,0.11604,0.11629,0.11566,0.1148,0.11708,0.11552,0.11524,0.11625,0.11729,0.11636,0.11585,0.11646,0.11672,0.11554,0.11666,0.11565,0.1162,0.11583,0.11671,0.80848,0.9783,0.88482,0.82476,0.117,0.11603,0.11611,0.11585,0.11588,0.11557,0.11629,0.117,0.11585,0.11556,0.11568,0.11574,0.11663,0.11547,0.1154,1.5994,0.85935,0.99414,0.84477,0.8048,0.89283,0.87991,0.11689,0.11649,0.11546,0.11603,0.11701,0.11545,0.11637,0.11599,0.11532,0.11555,0.11602,0.11683,0.11598,0.11592,0.11677,1.596,1.5932,0.79779,0.59073,0.86541,0.65432,0.8454,0.88337,0.83884,0.8509,0.11616,0.11705,0.11678,0.11573,0.11612,0.11534,0.11677,0.1153,0.11539,0.11555,0.11594,0.11557,0.1162,0.11534,0.11619,1.5912,1.593,1.6016,0.84653,0.98702,0.77527,0.86736,0.85671,0.85703,0.91313,0.87727,0.91136,0.11609,0.11648,0.11642,0.11571,0.11595,0.11527,0.11561,0.11645,0.11414,0.11522,0.11712,0.1163,0.11616,0.11723,0.11601,0.11615,1.6017,1.603,1.5976,1.6013,0.96776,0.93213,0.81487,0.96109,0.81374,0.70151,0.90384,0.87756,0.65947,0.77052,0.11637,0.11571,0.11561,0.11638,0.11634,0.11612,0.11561,0.11594,0.11596,0.11629,0.11455,0.11635,0.11478,0.11503,0.1164,0.11582,1.5909,1.5988,1.6035,1.5909,1.6034,1.6033,0.8561,0.88765,0.79031,0

.92173,0.84399,0.95246,1.0253,0.88227,1.165,0.85467,0.11577,0.11653,0.11563,0.11669,0.11615,0.11546,0.11599,0.11631,0.11621,0.11573,0.11651,0.11678,0.11568,0.11611,0.11568,0.11607,0.11643,1.583,1.5868,1.5888,1.5972,1.5998,1.6035,0.87909,0.95363,0.84037,0.85527,0.85594,0.86339,0.85204,0.95329,1.0047,0.98695,0.93089,0.11712,0.11531,0.11661,0.11516,0.11651,0.11602,0.11618,0.11613,0.11587,0.11586,0.11584,0.11685,0.1157,0.11006,0.11026,0.1103,0.11555,1.6005,1.586,1.5979,1.6008,1.5996,1.6099,1.602,0.85645,0.85305,0.95082,0.86117,0.73828,0.7269,0.88431,0.77095,0.73255,0.71345,0.96801,0.1149,0.11517,0.11632,0.11435,0.1149,0.11596,0.11649,0.11536,0.11661,0.11532,0.11627,0.10999,0.10806,0.10909,0.11045,0.10974,0.10871,0.11504,1.5973,1.6131,1.602,1.5984,1.5924,1.5827,1.5949,1.012,0.87322,0.87741,0.91759,0.72499,1.082,0.93526,0.85641,0.85872,0.82204,0.97515,0.11569,0.11502,0.11657,0.11568,0.11626,0.11604,0.11594,0.11485,0.11622,0.10934,0.10946,0.10995,0.10957,0.10987,0.11028,0.11007,0.1099,0.11047,0.11583,1.6074,1.5947,1.5877,1.5965,1.5986,1.5905,1.6056,0.9331,0.85926,0.89581,0.85817,0.99246,1.0464,0.81119,0.94203,0.85932,0.97978,0.86248,0.65253,0.1166,0.11672,0.11604,0.11596,0.11666,0.11572,0.11002,0.10946,0.1099,0.10976,0.11022,0.11097,0.1096,0.10873,0.10993,0.11043,0.11059,0.10829,1.5976,1.5987,1.5958,1.5944,1.6045,1.5984,1.6063,0.77908,0.83448,1.0279,0.85649,0.71564,0.9231,0.92432,0.97406,0.7738,1.1028,0.91829,0.9056,0.11622,0.11641,0.116,0.11011,0.109,0.11115,0.10925,0.10981,0.10923,0.10903,0.11019,0.11054,0.10999,0.10868,0.10881,0.11046,0.10958,0.10922,1.5998,1.5984,1.5979,1.5973,1.5969,1.6007,1.6044,1.6045,1.603,0.85733,0.90983,0.85423,0.97022,0.85824,0.85205,0.85568,0.85537,0.93621,1.0768,0.88939,0.10983,0.1096,0.11091,0.10874,0.10966,0.10924,0.10974,0.10951,0.1093,0.10713,0.11045,0.10881,0.1104,0.10994,0.11013,0.11051,0.1111,0.1099,1.5978,1.5946,1.6015,1.5956,1.6004,1.5994,1.5997,1.5999,1.5875,0.85823,0.58995,0.61216,0.559,0.60532,0.55862,0.60628,0.62562,0.6058,0.67253,0.5861,0.11133,0.10995,0.11019,0.1094,0.10822,0.11024,0.10845,0.1097,0.11149,0.10969,0.1091,0.10989,0.10834,0.10996,0.11097,0.11042,0.11018,0.10879,1.6061,1.5984,1.5987,1.5953,1.5972,1.6012,1.5953,1.5888,1.5976,0.87318,0.61908,0.60729,0.61692,0.60425,0.62221,0.57224,0.51212,0.59151,0.60494,0.65124,0.11072,0.11091,0.1097,0.1098,0.10923,0.10984,0.11011,0.11019,0.11004,0.10968,0.11035,0.10795,0.10964,0.11055,0.11098,0.11065,0.11066,0.10851,1.5992,1.6016,1.5925,1.6041,1.5939,1.5982,1.5885,0.8497,0.78155,0.66856,0.60023,0.53934,0.6063,0.6579,0.70215,0.66192,0.71036,0.6516,0.64099,0.63754,0.11082,0.1114,0.10887,0.10957,0.11061,0.11046,0.10925,0.1105,0.1107,0.10863,0.1102,0.10878,0.10875,0.10844,0.11012,0.10936,0.11212,0.10968,1.6045,1.6021,1.5922,1.6004,1.5999,1.5956,0.85308,0.64319,0.91038,1.1367,0.84874,0.50501,0.54642,0.69066,0.51133,0.60853,0.70026,0.68127,0.65225,0.6445,0.11011,0.11057,0.10906,0.10952,0.10882,0.10927,0.10901,0.11053,0.11009,0.10957,0.10966,0.10947,0.10952,0.10952,0.10962,0.11029,0.10979,0.10991,1.5935,1.5997,1.5941,1.6051,1.6085,0.84989,0.8,0.85265,0.90189,0.84954,0.8516,0.58257,0.64708,0.60353,0.60587,0.58526,0.6583,0.65393,0.52208,0.65845,0.10867,0.10831,0.10922,0.10921,0.11024,0.1105,0.11044,0.10954,0.11002,0.11051,0.11072,0.11082,0.10953,0.10993,0.10897,0.11207,0.1099,0.10994,1.595,1.6,1.6022,0.71923,0.90884,0.85692,0.75786,0.89728,0.8484,0.83754,0.83019,0.66373,0.53397,0.6317,0.60516,0.46524,0.5733,0.52485,0.51639,0.60693,0.10913,0.10978,0.10957,0.11078,0.10979,0.11047,0.10842,0.10954,0.10963,0.10935,0.11051,0.10982,0.10846,0.10847,0.11065,0.10894,0.11039,0.11,1.5971,0.85022,0.85052,1.0138,

1.0339,0.81658,0.81252,0.90848,0.8593,0.85762,0.67562,0.72097,0.63241,  
0.58896,0.61772,0.58516,0.63716,0.6526,0.59445,0.10987,0.11046,0.11094  
,0.11012,0.10988,0.11082,0.10731,0.11002,0.10988,0.10945,0.10988,0.109  
7,0.1118,0.11031,0.11168,0.10916,0.10991,0.10352,0.88484,0.85252,0.922  
25,0.85117,0.75071,0.77525,0.85334,0.76279,0.80731,0.97565,0.60538,0.6  
3349,0.65001,0.69105,0.60623,0.57576,0.68035,0.67624,0.57214,0.11069,0  
.10936,0.11051,0.10956,0.1101,0.10988,0.1107,0.11003,0.10625,0.10988,0  
.1097,0.10998,0.11018,0.11022,0.10775,0.1087,0.10948,0.10417,0.97645,0  
.99024,0.83781,0.74113,0.71141,0.81619,0.85851,0.85308,0.85465,0.85223  
,0.59633,0.60638,0.57271,0.58134,0.56064,0.60771,0.50825,0.57018,0.109  
6,0.10817,0.11,0.11065,0.11011,0.1085,0.10987,0.10983,0.10916,0.11008,  
0.10976,0.10988,0.10979,0.11039,0.10867,0.11007,0.11031,0.1091,0.10347  
,0.72363,0.9171,0.99597,0.84549,0.85131,0.85077,0.9019,0.86412,0.75866  
,0.84906,0.57464,0.6731,0.63647,0.62429,0.58855,0.61969,0.62972,0.6684  
4,0.10925,0.11015,0.1101,0.10912,0.1119,0.10969,0.10938,0.10989,0.1099  
6,0.11061,0.10972,0.1101,0.11115,0.1085,0.11015,0.11,0.10971,0.10373,0  
.10391,0.10376,0.57996,0.85183,0.76153,0.84992,0.71983,0.85061,0.83261  
,0.91897,0.92718,0.69687,0.50006,0.53514,0.56856,0.58517,0.61073,0.109  
65,0.11061,0.11028,0.10987,0.11051,0.11129,0.1092,0.1093,0.11018,0.109  
43,0.11212,0.11003,0.10863,0.109,0.11055,0.1112,0.10919,0.10996,0.1035  
5,0.10336,0.10372,0.10344,0.84885,0.7398,0.87801,0.8508,0.84898,0.8502  
4,0.90928,0.83844,0.85655,0.56687,0.61,0.52894,0.11035,0.11042,0.10997  
,0.10857,0.1107,0.10938,0.11025,0.11204,0.11011,0.11013,0.10984,0.1137  
1,0.10838,0.11034,0.10993,0.10974,0.10922,0.11007,0.10772,0.10983,0.10  
324,0.10361,0.10398,0.10378,0.10405,0.1031,0.746,0.64602,0.92121,0.846  
82,0.82225,0.86768,0.9652,0.84851,0.10868,0.10927,0.10988,0.11111,0.10  
937,0.11004,0.10929,0.10906,0.11109,0.10992,0.109,0.1109,0.10981,0.110  
01,0.11023,0.10992,0.10978,0.10983,0.10964,0.11087,0.10991,0.10985,0.1  
1053,0.10379,0.10337,0.10351,0.1036,0.10375,0.10398,1.0399,0.83913,0.8  
5091,0.97169,0.93137,0.10342,0.1039,0.10937,0.10905,0.11107,0.10919,0.  
109,0.10903,0.10893,0.10962,0.10991,0.10916,0.10853,0.10919,0.11041,0.  
10992,0.1101,0.11041,0.10992,0.11093,0.1085,0.10979,0.10965,0.10377,0.  
10367,0.10359,0.10366,0.1034,0.1038,0.10369,0.10381,0.10365,0.10352,0.  
87521,0.84969,0.1039,0.10348,0.10356,0.10379,0.10883,0.11056,0.10932,0  
.10922,0.10821,0.11103,0.11042,0.10984,0.10969,0.10931,0.10951,0.10965  
,0.10826,0.1093,0.11035,0.10982,0.10979,0.11125,0.10935,0.10386,0.1035  
2,0.10348,0.10416,0.10329,0.10332,0.10396,0.10391,0.10367,0.10361,0.10  
338,0.1037,0.10334,0.10394,0.10362,0.10397,0.10392,0.10984,0.10983,0.1  
1171,0.11087,0.1101,0.10969,0.10897,0.11174,0.11128,0.10911,0.11059,0.  
11021,0.11014,0.10974,0.10963,0.10994,0.10345,0.10357,0.10327,0.1035,0  
.10328,0.10385,0.10374,0.10368,0.10402,0.10346,0.10365,0.1033,0.10395,  
0.10382,0.10398,0.10399,0.10378,0.10402,0.10388,0.10845,0.10993,0.1081  
7,0.10978,0.10996,0.11018,0.10897,0.10891,0.11039,0.10969,0.11094,0.10  
965,0.10885,0.10354,0.10376,0.10353,0.10362,0.1038,0.10384,0.10357,0.1  
0371,0.10341,0.10356,0.10354,0.10335,0.1035,0.10359,0.10425,0.10421,0.  
10366,0.10391,0.1037,0.10349,0.10395,0.11056,0.1098,0.10958,0.11066,0.  
10943,0.1113,0.11013,0.1111,0.11116,0.10405,0.10379,0.10353,0.10358,0.  
10387,0.10369,0.10286,0.10389,0.10354,0.1042,0.1035,0.10323,0.10379,0.  
10388,0.10361,0.10377,0.10349,0.10368,0.10379,0.10411,0.10374,0.10329,  
0.10346,0.10323,0.10375,0.11082,0.11023,0.10946,0.10949,0.10342,0.1039  
2,0.10403,0.10393,0.10362,0.10357,0.10356,0.10354,0.1035,0.10392,0.103  
77,0.10387,0.10329,0.10371,0.10307,0.10423,0.10303,0.10384,0.10352,0.1

0345,0.10421,0.10389,0.1035,0.10364,0.10313,0.10369,0.10364,0.10365,0.10321,0.10389,0.10359,0.10359,0.1036,0.10361,0.10394,0.10388,0.10358,0.10357,0.10418,0.10351,0.10352,0.10323,0.10386,0.10329,0.10376,0.10338,0.10347,0.10358,0.10393,0.10406,0.10384,0.1035,0.10356,0.10342,0.10345,0.10365,0.10337,0.10349,0.10334,0.10365,0.10346,0.10411,0.10335,0.10343,0.10317,0.10361,0.10322,0.10372,0.10333,0.10409,0.10374,0.10371,0.10352,0.10418,0.10385,0.10376,0.10361,0.10367,0.1035,0.10363,0.10369,0.10371,0.10441,0.10324,0.10336,0.10337,0.10407,0.10344,0.10402,0.10355,0.10386,0.10365,0.10377,0.10384,0.10418,0.10314,0.10394,0.10342,0.10374,0.10327,0.10362,0.10366,0.104,0.10363,0.10361,0.10384,0.10365,0.10323,0.10376,0.10387,0.10333,0.10321,0.10385,0.10394,0.10333,0.10437,0.10395,0.1041,0.10313,0.10323,0.10334,0.10369,0.10323,0.1034,0.10414,0.104,0.10354,0.10385,0.10391,0.10407,0.10317,0.10422,0.10351,0.10418,0.10355,0.10372,0.10337,0.10327,0.10329,0.10338,0.10379,0.10352,0.10361,0.10344,0.10351,0.10356,0.10366,0.10316,0.10348,0.10369,0.10345,0.10422,0.10344,0.1037,0.1039,0.10405,0.10355,0.10343,0.10352,0.10309,0.10328,0.10363,0.10377,0.10381,0.10407,0.10392,0.1039,0.10334,0.10382,0.10375,0.10315,0.10402,0.10372,0.10387,0.10369,0.10359,0.10415,0.10371,0.10328,0.10352,0.10337,0.10407,0.10291,0.10351,0.10329,0.10336,0.10404,0.10389,0.10385,0.10383,0.10429,0.10371,0.10355,0.10348,0.10304  
0.1434,0.14401,0.1443,0.14386,0.14246,0.14527,0.14356,0.14332,0.14434,0.14525,0.14432,0.14337,0.1439,0.14452,0.14326,0.14459,0.1441,0.14431,0.14367,0.14442,0.5995,0.7122,0.64869,0.61149,0.14474,0.14383,0.14374,0.14405,0.14376,0.14394,0.14412,0.14425,0.14405,0.1439,0.14375,0.14429,0.14451,0.14318,0.14339,1.1221,0.63392,0.71928,0.62273,0.59798,0.65503,0.64744,0.14516,0.14456,0.14338,0.14412,0.14519,0.1428,0.14404,0.14378,0.14353,0.14358,0.144,0.14466,0.14401,0.14348,0.14487,1.1183,1.1173,0.59155,0.45825,0.63958,0.49784,0.62375,0.64845,0.62,0.62711,0.14427,0.14474,0.14484,0.14378,0.14391,0.1431,0.14491,0.14335,0.14362,0.14339,0.14379,0.14349,0.14439,0.14364,0.1441,1.113,1.1174,1.1234,0.62341,0.71623,0.58001,0.63803,0.62979,0.63193,0.66762,0.64467,0.66654,0.14381,0.14421,0.14428,0.14322,0.14449,0.14317,0.14341,0.14403,0.14254,0.14297,0.14538,0.14439,0.14421,0.14489,0.14372,0.14367,1.1242,1.1273,1.1202,1.1278,0.70282,0.67969,0.60439,0.69871,0.60334,0.52933,0.66233,0.64741,0.50216,0.57453,0.14431,0.14391,0.14383,0.14459,0.14407,0.14398,0.14334,0.14366,0.14355,0.14396,0.14264,0.14443,0.14274,0.1431,0.14435,0.14366,1.1135,1.1185,1.125,1.1131,1.1252,1.1281,0.62839,0.65188,0.58955,0.67442,0.62187,0.69705,0.74108,0.64916,0.83496,0.62841,0.14396,0.14409,0.14348,0.14485,0.14435,0.14353,0.14376,0.14433,0.14398,0.1437,0.14413,0.14461,0.1431,0.14407,0.14366,0.14429,0.14413,1.1033,1.1114,1.1071,1.1191,1.1195,1.1236,0.64411,0.69231,0.62073,0.63043,0.63056,0.63774,0.62957,0.69552,0.72974,0.71929,0.68043,0.14531,0.14341,0.14471,0.14299,0.1445,0.14394,0.14435,0.1441,0.1441,0.14399,0.14378,0.14445,0.14377,0.12869,0.13009,0.13017,0.14372,1.1198,1.1085,1.1171,1.1255,1.1201,1.1319,1.127,0.63067,0.62715,0.69506,0.63785,0.55552,0.54518,0.64805,0.57379,0.55015,0.53673,0.70485,0.14285,0.1431,0.14411,0.14263,0.14298,0.14371,0.14489,0.14363,0.14444,0.14365,0.14357,0.12939,0.12457,0.12787,0.13006,0.12893,0.12664,0.14321,1.1189,1.1358,1.1206,1.1194,1.1155,1.1056,1.121,0.73345,0.64114,0.64525,0.6706,0.54564,0.77693,0.68177,0.63204,0.63365,0.61037,0.70976,0.14383,0.14325,0.14403,0.1436,0.14398,0.144,0.1435,0.14249,0.14387,0.12852,0.12871,0.12968,0.12889,0.12919,0.12949,0.12951,0.12913,0.13034,0.14396,1.1235,1.1188,1.1058,1.12,1.1205,1.

1123,1.1278,0.68334,0.63108,0.65497,0.63308,0.72177,0.75504,0.60372,0.68872,0.63063,0.71426,0.63698,0.49712,0.14478,0.14462,0.14437,0.14411,0.14474,0.14397,0.12922,0.12843,0.1291,0.12924,0.13057,0.13186,0.1286,0.12587,0.1294,0.12997,0.13003,0.12541,1.1188,1.1242,1.1143,1.1177,1.1286,1.1168,1.1296,0.5835,0.61689,0.74324,0.63029,0.53763,0.67522,0.6759,0.70619,0.57798,0.7945,0.66981,0.66075,0.14436,0.14443,0.14402,0.13112,0.12771,0.13151,0.12857,0.1291,0.12794,0.12729,0.12931,0.13105,0.12933,0.1264,0.12686,0.13069,0.1286,0.1289,1.1181,1.1203,1.1203,1.1202,1.1169,1.1164,1.1246,1.1241,1.1232,0.63193,0.66558,0.63263,0.70586,0.63355,0.63012,0.63055,0.63056,0.683,0.77729,0.64992,0.12906,0.12854,0.13067,0.12693,0.12878,0.12879,0.1296,0.12937,0.12759,0.12284,0.13051,0.12605,0.13002,0.12944,0.12943,0.13051,0.13093,0.12894,1.1164,1.1186,1.1231,1.1153,1.1212,1.1197,1.1193,1.1231,1.106,0.63306,0.45608,0.46455,0.42655,0.45903,0.42708,0.45819,0.47236,0.45814,0.5022,0.44748,0.1322,0.12955,0.12958,0.12862,0.12606,0.12983,0.12701,0.12883,0.13238,0.12871,0.12722,0.12894,0.12599,0.12992,0.13128,0.1297,0.12966,0.12611,1.1286,1.118,1.1247,1.1148,1.1199,1.1221,1.1163,1.1101,1.1219,0.63192,0.46993,0.45994,0.46879,0.45934,0.47102,0.43626,0.3987,0.44952,0.46064,0.48761,0.13009,0.13172,0.12964,0.12925,0.12761,0.1292,0.13055,0.1296,0.12959,0.1286,0.13056,0.12461,0.12883,0.1305,0.13146,0.13118,0.1321,0.12719,1.1223,1.1245,1.116,1.1306,1.117,1.1175,1.1095,0.61422,0.56802,0.49532,0.45468,0.41456,0.46044,0.49529,0.52117,0.49856,0.53061,0.48805,0.4809,0.47934,0.13126,0.13351,0.1267,0.12905,0.13046,0.12973,0.12742,0.13006,0.13034,0.12562,0.12998,0.12641,0.12665,0.12551,0.1293,0.1286,0.13419,0.1289,1.1295,1.1258,1.1119,1.1221,1.1218,1.1171,0.62012,0.47721,0.65758,0.8083,0.61546,0.39416,0.41977,0.5189,0.39797,0.46367,0.5238,0.50714,0.48929,0.4855,0.12997,0.1315,0.12694,0.12878,0.12701,0.12794,0.12771,0.13025,0.12926,0.12902,0.12887,0.12861,0.12794,0.12851,0.12906,0.13005,0.12919,0.12909,1.1178,1.1222,1.114,1.1338,1.13,0.61584,0.58101,0.61893,0.65182,0.61646,0.61755,0.44444,0.48644,0.45907,0.45971,0.44524,0.49581,0.49187,0.4056,0.49412,0.12658,0.12535,0.1279,0.12846,0.12975,0.13143,0.13044,0.12885,0.12982,0.13011,0.13114,0.13085,0.12866,0.12918,0.12834,0.13387,0.12919,0.1293,1.1166,1.1178,1.1164,0.52887,0.65563,0.62142,0.55338,0.64774,0.61408,0.60827,0.60238,0.49513,0.41243,0.4757,0.45955,0.36545,0.44035,0.40559,0.40091,0.46014,0.1276,0.12915,0.12887,0.13104,0.12908,0.13085,0.12633,0.12774,0.12916,0.12887,0.13129,0.12878,0.12635,0.12613,0.13031,0.12638,0.13013,0.12924,1.1178,0.61572,0.616,0.72496,0.73611,0.59736,0.59108,0.65606,0.62379,0.62061,0.50661,0.53746,0.47672,0.44789,0.46577,0.44692,0.47903,0.49126,0.45225,0.12948,0.13076,0.13278,0.1295,0.12973,0.13072,0.12314,0.12959,0.12916,0.1287,0.1289,0.12891,0.13371,0.13073,0.13323,0.12847,0.12989,0.11417,0.63914,0.6193,0.66668,0.61822,0.54844,0.56795,0.61879,0.55699,0.58815,0.69991,0.45981,0.47858,0.48791,0.51833,0.45843,0.43922,0.50694,0.50386,0.43741,0.13124,0.12804,0.13013,0.12833,0.12956,0.12927,0.13074,0.13013,0.12056,0.12947,0.12896,0.12984,0.12933,0.12995,0.12458,0.12591,0.1292,0.11485,0.70163,0.71132,0.60978,0.54177,0.52529,0.59617,0.62126,0.62035,0.62002,0.6159,0.4524,0.4596,0.43727,0.4437,0.42972,0.46067,0.39356,0.43448,0.12917,0.12482,0.12922,0.1304,0.12926,0.12596,0.12889,0.12845,0.12792,0.12927,0.12891,0.12926,0.12958,0.13007,0.12668,0.12945,0.12999,0.12774,0.11413,0.5329,0.65982,0.7137,0.61393,0.61522,0.61868,0.65106,0.62665,0.55595,0.61575,0.43644,0.50225,0.4804,0.47249,0.45023,0.4684,0.47378,0.49854,0.12758,0.12991,0.12913,0.12717,0.1351,0.12874,0.

12851,0.1293,0.12908,0.13128,0.12869,0.13007,0.1318,0.12638,0.12966,0.12931,0.12884,0.1144,0.11449,0.11426,0.43678,0.61788,0.55686,0.61605,0.52647,0.6166,0.60536,0.66597,0.66724,0.51804,0.39024,0.41211,0.43329,0.44602,0.46146,0.12814,0.13142,0.13009,0.12911,0.12968,0.13244,0.12694,0.12776,0.12943,0.12889,0.13426,0.12975,0.12691,0.12691,0.12972,0.13224,0.12812,0.12942,0.11403,0.11394,0.11458,0.11411,0.61617,0.54037,0.63373,0.6159,0.61526,0.61631,0.65583,0.61014,0.62054,0.43622,0.46208,0.40746,0.12937,0.12986,0.12945,0.12627,0.13061,0.12872,0.1292,0.13445,0.12943,0.12927,0.12859,0.13915,0.12596,0.13008,0.12922,0.12937,0.12809,0.12923,0.12391,0.12909,0.11409,0.11421,0.11473,0.1146,0.11461,0.11378,0.54723,0.48165,0.66478,0.61626,0.59609,0.6274,0.69512,0.6188,0.1266,0.1276,0.12976,0.13179,0.12802,0.12945,0.12864,0.12773,0.13184,0.12913,0.12708,0.13164,0.12914,0.13005,0.12992,0.12922,0.12874,0.12916,0.12857,0.13122,0.12932,0.12891,0.13103,0.11444,0.11409,0.11442,0.11429,0.11452,0.1144,0.74859,0.60975,0.61794,0.69977,0.67016,0.11426,0.11443,0.1288,0.12832,0.13138,0.1282,0.12852,0.12645,0.12716,0.12802,0.12963,0.12792,0.12653,0.12792,0.13063,0.1295,0.1293,0.13042,0.13006,0.13169,0.12582,0.12852,0.12919,0.11433,0.11411,0.11422,0.11425,0.11407,0.11437,0.11449,0.11444,0.11442,0.11444,0.63385,0.61862,0.11461,0.11404,0.11457,0.11442,0.1282,0.12991,0.1284,0.12805,0.12473,0.13208,0.13045,0.12905,0.12927,0.12863,0.12857,0.12901,0.12543,0.12802,0.13059,0.12919,0.12882,0.13206,0.12831,0.1147,0.11438,0.114,0.1149,0.11413,0.11407,0.11462,0.11445,0.11432,0.11438,0.11388,0.11448,0.11408,0.11468,0.11422,0.11466,0.11484,0.12925,0.12859,0.1335,0.13197,0.12958,0.12928,0.12717,0.1333,0.13282,0.12756,0.13058,0.12959,0.12948,0.12913,0.12887,0.12944,0.11404,0.11422,0.11366,0.11415,0.11382,0.11452,0.11434,0.11431,0.11476,0.11423,0.11401,0.1142,0.11454,0.11447,0.11472,0.11477,0.11459,0.11462,0.11451,0.12557,0.12926,0.1244,0.12926,0.12934,0.12956,0.12818,0.12671,0.12966,0.12923,0.13112,0.12875,0.12707,0.11415,0.11436,0.11438,0.11438,0.11425,0.11455,0.11427,0.11426,0.11418,0.11423,0.11413,0.11421,0.11417,0.11443,0.11501,0.11455,0.11451,0.11436,0.11431,0.11422,0.11463,0.12996,0.12898,0.12907,0.13062,0.12802,0.1317,0.12946,0.13139,0.13161,0.11466,0.11457,0.11426,0.11404,0.11433,0.1144,0.11369,0.11451,0.11402,0.11477,0.11423,0.1139,0.11439,0.11455,0.11416,0.11445,0.11419,0.11428,0.11441,0.11463,0.11461,0.11397,0.11427,0.11373,0.1146,0.13134,0.1306,0.12809,0.12792,0.11417,0.11452,0.11474,0.11437,0.11435,0.11425,0.11414,0.11445,0.11413,0.11451,0.11429,0.11445,0.11383,0.11457,0.11384,0.11486,0.11376,0.11458,0.1141,0.11407,0.11495,0.11444,0.11401,0.11426,0.11381,0.11434,0.11441,0.11421,0.11407,0.1145,0.11448,0.11445,0.11425,0.11435,0.11462,0.11461,0.11435,0.11452,0.11475,0.11407,0.11419,0.11395,0.11447,0.11391,0.11421,0.11391,0.11397,0.11416,0.11454,0.11477,0.11437,0.11417,0.1143,0.11399,0.11429,0.11441,0.11397,0.11432,0.11393,0.11419,0.11403,0.11479,0.11392,0.1142,0.11386,0.11432,0.11401,0.11408,0.11392,0.1148,0.11449,0.11433,0.11421,0.11487,0.11428,0.1145,0.11421,0.11446,0.11419,0.11428,0.11445,0.11453,0.11502,0.11416,0.1138,0.11431,0.11494,0.11387,0.11467,0.1142,0.11456,0.11426,0.11433,0.11453,0.1146,0.11383,0.11458,0.11432,0.11436,0.11429,0.11418,0.1142,0.11481,0.1143,0.11427,0.11445,0.1143,0.11372,0.11447,0.11466,0.11401,0.11395,0.11466,0.11473,0.11415,0.11491,0.11454,0.11474,0.11398,0.11385,0.1141,0.11433,0.1138,0.1142,0.11472,0.11434,0.11432,0.11433,0.11475,0.11451,0.11401,0.11489,0.11424,0.11465,0.11422,0.11447,0.11411,0.11393,0.11404,0.11412,0.11435,0.11428,0.1144,0.11419,0.1142,0.11431,0.114,0.11397,0.11

406,0.11432,0.11413,0.11493,0.11407,0.1143,0.11452,0.1147,0.11444,0.11  
393,0.11403,0.11412,0.11404,0.11426,0.11462,0.11435,0.11467,0.11478,0.  
1148,0.11383,0.11438,0.11433,0.11395,0.11461,0.11449,0.11467,0.11419,0  
.11425,0.11486,0.11444,0.11425,0.11414,0.11399,0.1146,0.11367,0.11404,  
0.11412,0.1142,0.1147,0.11463,0.11454,0.1144,0.11499,0.11438,0.11423,0  
.11385,0.11358  
0.1614,0.16199,0.16145,0.16162,0.1605,0.16309,0.16138,0.16074,0.16213,  
0.16286,0.16227,0.16098,0.16188,0.16217,0.16115,0.16275,0.16143,0.1621  
8,0.16161,0.16207,0.47266,0.55051,0.50644,0.48008,0.16249,0.16158,0.16  
141,0.16166,0.16149,0.16139,0.1618,0.16264,0.1616,0.16169,0.16161,0.16  
176,0.16211,0.16093,0.16161,0.82908,0.49765,0.55448,0.48851,0.47281,0.  
51087,0.5069,0.16286,0.16212,0.16087,0.16212,0.16312,0.16033,0.16195,0  
.16165,0.1615,0.16159,0.16184,0.16249,0.16215,0.16143,0.16252,0.8308,0  
.82594,0.46876,0.37732,0.5016,0.40435,0.49,0.50751,0.4881,0.49264,0.16  
186,0.16223,0.16254,0.16199,0.16196,0.16109,0.1626,0.16107,0.16186,0.1  
6122,0.16186,0.16127,0.1621,0.1612,0.16165,0.82362,0.82689,0.83491,0.4  
9073,0.55324,0.45932,0.50047,0.49466,0.49443,0.51782,0.50459,0.5172,0.  
16175,0.16226,0.16213,0.16141,0.1623,0.16161,0.16169,0.16185,0.16076,0  
.16075,0.16344,0.16237,0.16161,0.16285,0.16162,0.16195,0.83507,0.83514  
,0.83058,0.83403,0.54048,0.52862,0.47666,0.53936,0.4764,0.42646,0.5184  
2,0.50505,0.40742,0.45635,0.16206,0.16184,0.16181,0.1621,0.16203,0.161  
73,0.16124,0.16157,0.16136,0.16189,0.16064,0.162,0.16073,0.16103,0.162  
38,0.16127,0.8242,0.83127,0.83149,0.82218,0.83212,0.83582,0.49265,0.50  
933,0.46556,0.52569,0.48851,0.5415,0.56943,0.50866,0.63428,0.49151,0.1  
6172,0.16213,0.16174,0.16258,0.16186,0.16152,0.16161,0.16202,0.16163,0  
.16154,0.16163,0.16252,0.16122,0.16204,0.16138,0.16202,0.1615,0.81499,  
0.82405,0.81563,0.82673,0.82389,0.83534,0.50345,0.53475,0.48894,0.4958  
,0.49559,0.50012,0.49276,0.53932,0.56472,0.55582,0.52757,0.16317,0.161  
27,0.16205,0.16107,0.16229,0.16144,0.16235,0.16165,0.16183,0.16212,0.1  
6181,0.1629,0.16168,0.13698,0.1399,0.13935,0.16166,0.82553,0.81764,0.8  
3082,0.83259,0.83181,0.84212,0.83541,0.49273,0.49302,0.53935,0.50307,0  
.443,0.43652,0.50405,0.45508,0.43916,0.43159,0.54603,0.16089,0.16089,0  
.16218,0.16068,0.16056,0.16172,0.16246,0.16139,0.16221,0.16161,0.16146  
,0.13828,0.13029,0.13637,0.13893,0.13761,0.1339,0.16085,0.83118,0.8447  
3,0.83301,0.83002,0.82138,0.818,0.82999,0.56255,0.50143,0.50449,0.5221  
8,0.43832,0.59349,0.52987,0.49371,0.49691,0.48228,0.54856,0.16204,0.16  
111,0.16201,0.16199,0.16177,0.16206,0.1612,0.1606,0.16165,0.1373,0.137  
5,0.13874,0.1376,0.13781,0.13822,0.1386,0.13723,0.13989,0.16173,0.8333  
4,0.83249,0.81897,0.82618,0.82737,0.8209,0.83719,0.53266,0.49497,0.510  
31,0.49449,0.5577,0.57874,0.4786,0.53476,0.49376,0.55098,0.49958,0.402  
72,0.16285,0.16243,0.16215,0.16216,0.16255,0.16175,0.13807,0.13675,0.1  
3764,0.13774,0.14017,0.14216,0.13718,0.13252,0.13792,0.1387,0.13887,0.  
1315,0.82922,0.83503,0.82286,0.82893,0.8342,0.82501,0.83727,0.46232,0.  
48431,0.57024,0.49573,0.42998,0.52463,0.52573,0.54513,0.46014,0.60541,  
0.51886,0.51308,0.16228,0.16222,0.16211,0.14136,0.13591,0.14123,0.1374  
8,0.13782,0.13597,0.13502,0.1376,0.1408,0.13831,0.13337,0.1342,0.14014  
,0.13736,0.1374,0.82548,0.82785,0.82865,0.827,0.82387,0.82447,0.83396,  
0.83661,0.8323,0.49501,0.51867,0.49654,0.54599,0.49802,0.49398,0.49343  
,0.49326,0.53103,0.5935,0.50605,0.13771,0.13661,0.13962,0.13468,0.1375  
9,0.13745,0.13852,0.13845,0.13529,0.12798,0.13992,0.13304,0.13881,0.13  
83,0.13785,0.14007,0.13994,0.13727,0.83029,0.82893,0.83166,0.82193,0.8  
3016,0.82599,0.8283,0.83004,0.81363,0.4954,0.37572,0.37401,0.34127,0.3



6726,0.34518,0.36557,0.37628,0.36593,0.39667,0.36285,0.14251,0.13856,0.13841,0.1375,0.13282,0.13852,0.13509,0.13678,0.14277,0.1376,0.13444,0.1377,0.13269,0.13926,0.14072,0.13855,0.13843,0.13309,0.83169,0.82322,0.83393,0.82516,0.82956,0.83312,0.8245,0.81766,0.83223,0.48144,0.3749,0.36886,0.37722,0.36896,0.37526,0.35117,0.32669,0.36223,0.37104,0.38789,0.13904,0.14201,0.13901,0.13793,0.13533,0.13791,0.14001,0.13812,0.13829,0.13719,0.14029,0.13056,0.13756,0.14017,0.14154,0.14099,0.14284,0.13504,0.82782,0.83647,0.82212,0.84272,0.82699,0.82464,0.81741,0.46729,0.43758,0.38582,0.36531,0.33695,0.36932,0.39309,0.40877,0.39605,0.42034,0.38641,0.38109,0.3812,0.14098,0.14492,0.13367,0.13765,0.13963,0.13827,0.1347,0.1391,0.13932,0.13207,0.13908,0.13362,0.13446,0.13192,0.13765,0.13737,0.14611,0.13796,0.83826,0.83421,0.82194,0.83444,0.82977,0.82776,0.47602,0.36955,0.50126,0.60676,0.47139,0.32349,0.33999,0.41252,0.32756,0.37121,0.41583,0.39847,0.38913,0.38571,0.13898,0.14155,0.13377,0.13752,0.13438,0.13606,0.13592,0.13942,0.13797,0.13807,0.13729,0.13755,0.13532,0.13707,0.13802,0.13912,0.13787,0.13776,0.82976,0.83255,0.82279,0.84264,0.83901,0.47203,0.44608,0.47051,0.49504,0.46975,0.47264,0.35914,0.38622,0.36782,0.36881,0.35871,0.3956,0.39313,0.33205,0.3913,0.13362,0.13175,0.13619,0.13715,0.13916,0.14181,0.13971,0.13767,0.13904,0.13896,0.14096,0.14069,0.13727,0.13808,0.1371,0.14475,0.13805,0.13813,0.82846,0.82911,0.82583,0.40852,0.49985,0.47629,0.42445,0.4919,0.4704,0.46411,0.46013,0.39057,0.33618,0.37799,0.36741,0.30347,0.35518,0.33195,0.3279,0.36989,0.13572,0.13782,0.13766,0.14081,0.13806,0.14037,0.13384,0.13526,0.13798,0.13787,0.14147,0.13725,0.13361,0.13287,0.13949,0.13344,0.13936,0.13791,0.82594,0.47176,0.46992,0.54845,0.55338,0.45966,0.45399,0.50019,0.4757,0.47437,0.40216,0.42278,0.3812,0.35935,0.37217,0.35915,0.38171,0.39051,0.36382,0.13868,0.14086,0.14457,0.13832,0.13873,0.13988,0.12828,0.13832,0.13765,0.13767,0.13759,0.13778,0.14492,0.14083,0.14423,0.13735,0.13931,0.11383,0.48822,0.47498,0.50752,0.47227,0.42306,0.43565,0.47186,0.43022,0.45217,0.52695,0.36793,0.38081,0.38986,0.41194,0.36716,0.35418,0.40105,0.39618,0.35239,0.14103,0.13599,0.13915,0.13682,0.13818,0.13766,0.14063,0.13981,0.12397,0.1384,0.1379,0.13931,0.13818,0.13925,0.13023,0.13249,0.13818,0.11432,0.53205,0.53757,0.46722,0.41789,0.40567,0.45541,0.47463,0.47451,0.47566,0.46859,0.36269,0.3683,0.35334,0.3583,0.34839,0.36932,0.32229,0.3504,0.1376,0.13081,0.13808,0.13961,0.13768,0.13334,0.13765,0.13651,0.13615,0.1372,0.13752,0.13766,0.13846,0.13926,0.13404,0.13819,0.13927,0.13549,0.11364,0.41002,0.50192,0.53765,0.46949,0.47125,0.4754,0.49376,0.47762,0.42626,0.47153,0.35073,0.394,0.38285,0.37717,0.36373,0.37578,0.37816,0.39313,0.13568,0.13875,0.1377,0.1345,0.14732,0.13753,0.13759,0.13786,0.1375,0.14136,0.13705,0.13934,0.1416,0.13349,0.13847,0.1379,0.13754,0.11397,0.11397,0.11374,0.34428,0.47106,0.4297,0.47042,0.40677,0.47313,0.46512,0.50671,0.5057,0.40786,0.3207,0.33626,0.34808,0.35958,0.36922,0.1364,0.14171,0.13942,0.13746,0.13857,0.14301,0.13395,0.13561,0.13826,0.13765,0.14588,0.13926,0.13457,0.13448,0.13826,0.14234,0.13662,0.13841,0.11365,0.11363,0.11405,0.11393,0.4684,0.41552,0.48428,0.46979,0.47033,0.47181,0.50113,0.46583,0.47627,0.35482,0.37061,0.33123,0.13807,0.13913,0.13802,0.13317,0.14011,0.13735,0.13816,0.14639,0.1378,0.13792,0.13667,0.15447,0.13271,0.13937,0.13795,0.13822,0.13629,0.13784,0.12917,0.1377,0.11359,0.11363,0.11432,0.11424,0.11424,0.11364,0.42199,0.37731,0.50591,0.47297,0.45553,0.47858,0.52547,0.47236,0.13378,0.13506,0.13885,0.14231,0.13583,0.13824,0.1375,0.13564,0.1421,0.13782,0.13459,0.14188,0.13775,0.

13946,0.13943,0.138,0.13718,0.13784,0.13648,0.14088,0.13807,0.13728,0.  
1409,0.11392,0.11376,0.11414,0.11379,0.11405,0.11373,0.56513,0.46776,0.  
.47004,0.52697,0.50773,0.11363,0.11393,0.13775,0.13704,0.14119,0.13642  
,0.13731,0.13336,0.13444,0.13609,0.13849,0.13622,0.13381,0.13601,0.140  
26,0.13863,0.13804,0.13975,0.13936,0.14165,0.13191,0.13642,0.13805,0.1  
138,0.11381,0.11376,0.11362,0.11336,0.11388,0.11391,0.11394,0.11398,0.  
11408,0.48145,0.47271,0.1142,0.1136,0.11408,0.11418,0.13691,0.13896,0.  
13695,0.1361,0.1307,0.14262,0.13975,0.13771,0.13797,0.1374,0.1372,0.13  
767,0.13198,0.13573,0.14005,0.13795,0.13772,0.14257,0.13652,0.11429,0.  
11383,0.11367,0.11432,0.11362,0.11355,0.11402,0.11397,0.11385,0.11393,  
0.11359,0.11419,0.11357,0.11421,0.1139,0.11402,0.1145,0.13815,0.13675,  
0.1451,0.14215,0.13775,0.13804,0.13529,0.14424,0.14333,0.13552,0.14007  
,0.13836,0.13817,0.13781,0.13764,0.13818,0.11383,0.11383,0.11319,0.113  
53,0.11344,0.11393,0.11376,0.11384,0.11425,0.11371,0.11371,0.1137,0.11  
408,0.11401,0.11416,0.1143,0.11398,0.1142,0.11405,0.13183,0.13796,0.12  
966,0.13845,0.13785,0.13829,0.13694,0.13387,0.13844,0.13792,0.14032,0.  
13746,0.13457,0.11382,0.11367,0.11399,0.11414,0.11375,0.11425,0.11374,  
0.11387,0.1137,0.1139,0.11366,0.11364,0.11372,0.11401,0.11441,0.11414,  
0.11426,0.11383,0.11377,0.11388,0.11435,0.13827,0.13767,0.138,0.13999,  
0.13588,0.14223,0.13834,0.14116,0.14157,0.11415,0.1142,0.11388,0.11356  
,0.11406,0.11397,0.11329,0.1139,0.11374,0.11437,0.11368,0.11347,0.1139  
2,0.11427,0.11383,0.1139,0.11387,0.1138,0.11396,0.1141,0.1144,0.1135,0  
.11376,0.11339,0.11403,0.14149,0.13997,0.13581,0.13552,0.11381,0.11421  
,0.1144,0.11375,0.11409,0.11377,0.11387,0.11404,0.11363,0.11398,0.1138  
3,0.11398,0.11345,0.11417,0.1134,0.11446,0.11351,0.11416,0.11357,0.113  
74,0.11442,0.11398,0.1135,0.11386,0.11336,0.11384,0.11404,0.1136,0.113  
77,0.11414,0.11391,0.11393,0.11382,0.1138,0.11411,0.11413,0.11403,0.11  
413,0.11436,0.11346,0.11384,0.11348,0.11413,0.11346,0.1138,0.11344,0.1  
1357,0.11384,0.11414,0.11417,0.11394,0.11379,0.11387,0.1136,0.11389,0.  
11401,0.11371,0.11378,0.11344,0.11364,0.11369,0.1143,0.1133,0.11367,0.  
11351,0.11389,0.11365,0.1136,0.11356,0.11448,0.114,0.11385,0.11393,0.1  
1447,0.11404,0.11417,0.11396,0.11417,0.11358,0.11382,0.11403,0.11416,0  
.11478,0.11365,0.11349,0.11383,0.11435,0.11331,0.11425,0.11377,0.11387  
,0.11363,0.11385,0.11414,0.11414,0.1136,0.1141,0.11398,0.11398,0.1138,  
0.11367,0.1138,0.11436,0.11402,0.11402,0.11389,0.11384,0.11339,0.11389  
,0.11417,0.11375,0.11354,0.11416,0.11437,0.11368,0.1144,0.11391,0.1140  
4,0.11343,0.11341,0.11376,0.11382,0.11341,0.11359,0.11419,0.1141,0.113  
83,0.11398,0.11444,0.11399,0.11363,0.11445,0.1138,0.11422,0.1138,0.114  
25,0.11363,0.11356,0.11356,0.11372,0.114,0.11385,0.11402,0.11362,0.113  
82,0.11382,0.11371,0.11377,0.11373,0.11418,0.11388,0.11436,0.11379,0.1  
1395,0.11396,0.11417,0.11412,0.1136,0.11358,0.1137,0.11347,0.11402,0.1  
142,0.11412,0.11434,0.11434,0.11432,0.11351,0.11386,0.11381,0.11356,0.  
11422,0.11399,0.11418,0.11394,0.1138,0.11441,0.11407,0.11394,0.11374,0  
.11341,0.11436,0.11366,0.11372,0.1135,0.11377,0.11417,0.1141,0.11395,0  
.11403,0.11462,0.1139,0.1139,0.11356,0.11324  
0.1731,0.17376,0.17361,0.17314,0.17277,0.17483,0.17293,0.17267,0.17324  
,0.17477,0.17336,0.17252,0.1739,0.17374,0.17274,0.17439,0.17336,0.1737  
,0.17308,0.17357,0.3952,0.45298,0.41869,0.40095,0.17369,0.17352,0.1731  
3,0.17365,0.17338,0.17307,0.17321,0.17438,0.17312,0.17331,0.17356,0.17  
355,0.17358,0.17286,0.17313,0.65017,0.41519,0.45607,0.40732,0.39803,0.  
42366,0.42278,0.1743,0.17411,0.17222,0.17325,0.17462,0.17246,0.17356,0  
.17317,0.17345,0.17322,0.17339,0.17436,0.17338,0.17326,0.17365,0.65034

,0.6528,0.39504,0.32944,0.41845,0.34775,0.40827,0.4187,0.41045,0.41096  
,0.17351,0.174,0.1741,0.17382,0.17336,0.17265,0.17429,0.17294,0.17357,  
0.17269,0.17338,0.17291,0.1735,0.17289,0.17303,0.64148,0.65499,0.65717  
,0.40753,0.44991,0.38855,0.41507,0.41231,0.41172,0.4279,0.41932,0.4254  
9,0.17349,0.17382,0.17388,0.17251,0.1735,0.17336,0.17333,0.17355,0.172  
6,0.17249,0.17509,0.17386,0.17293,0.17475,0.17281,0.17374,0.65718,0.65  
956,0.65212,0.65574,0.44364,0.43511,0.39823,0.44371,0.39987,0.36369,0.  
42849,0.41929,0.35009,0.38586,0.17372,0.17376,0.17316,0.174,0.17326,0.  
17341,0.17312,0.1732,0.17312,0.17355,0.17242,0.17387,0.17272,0.17278,0.  
.17372,0.17289,0.64897,0.65486,0.6541,0.64864,0.65608,0.65522,0.41099,  
0.42281,0.39202,0.43461,0.40713,0.44541,0.46489,0.42385,0.51198,0.4069  
8,0.17336,0.17402,0.17339,0.17406,0.17377,0.17297,0.17302,0.1743,0.173  
49,0.17315,0.17329,0.17424,0.17271,0.1737,0.173,0.17384,0.17288,0.6379  
1,0.64949,0.63828,0.65118,0.64861,0.65434,0.41681,0.44147,0.41101,0.41  
04,0.41353,0.41615,0.41064,0.44418,0.46265,0.45476,0.43404,0.17477,0.1  
729,0.17364,0.17254,0.17375,0.17322,0.17441,0.17335,0.17381,0.17396,0.  
17352,0.17436,0.1736,0.13972,0.14394,0.14258,0.17316,0.64669,0.64345,0.  
.65446,0.6532,0.65879,0.66345,0.65513,0.4096,0.40752,0.4451,0.41726,0.  
37337,0.36935,0.41781,0.38519,0.3719,0.36774,0.44951,0.17282,0.17282,0.  
.17383,0.17226,0.17197,0.17319,0.17418,0.17301,0.17379,0.17345,0.17345  
,0.14149,0.13074,0.13887,0.14176,0.14054,0.13551,0.17255,0.65406,0.670  
04,0.65299,0.65175,0.64854,0.64286,0.65183,0.45823,0.41711,0.41935,0.4  
319,0.37068,0.48069,0.43673,0.41119,0.41379,0.40412,0.45177,0.17424,0.  
17287,0.17357,0.17372,0.17348,0.17351,0.17263,0.17242,0.17336,0.14032,  
0.14052,0.14235,0.14079,0.14073,0.14114,0.14192,0.14001,0.14387,0.1737  
5,0.65372,0.65546,0.63959,0.64834,0.65164,0.64493,0.6635,0.43796,0.412  
09,0.42053,0.4104,0.4573,0.47436,0.4015,0.44033,0.41029,0.45376,0.4155  
1,0.34651,0.17475,0.17448,0.17383,0.17374,0.17435,0.17335,0.14094,0.13  
958,0.14032,0.14039,0.14441,0.14652,0.14031,0.13339,0.14109,0.14189,0.  
14186,0.13206,0.65098,0.65265,0.64713,0.65146,0.65692,0.64966,0.66302,  
0.39059,0.40531,0.46557,0.41398,0.36479,0.43292,0.43237,0.4472,0.38797  
,0.49129,0.43046,0.42433,0.17433,0.17372,0.17362,0.14576,0.13801,0.145  
29,0.14076,0.14082,0.13805,0.13721,0.14053,0.14479,0.14147,0.13503,0.1  
3602,0.14405,0.14065,0.14074,0.6498,0.65147,0.65354,0.64745,0.64628,0.  
64214,0.65639,0.65974,0.65789,0.41296,0.43018,0.41308,0.45128,0.41525,  
0.41091,0.40929,0.41018,0.43808,0.48013,0.41679,0.14043,0.1393,0.14283  
,0.13671,0.14061,0.14071,0.14193,0.14182,0.13756,0.12756,0.14348,0.134  
17,0.14218,0.14128,0.14106,0.14391,0.1434,0.14026,0.64984,0.65327,0.65  
723,0.64866,0.65236,0.6482,0.65443,0.65487,0.63893,0.41286,0.32816,0.3  
1659,0.28935,0.3105,0.29413,0.30867,0.31907,0.30847,0.33143,0.30842,0.  
14696,0.14166,0.14138,0.14075,0.13414,0.14155,0.13741,0.13949,0.14706,  
0.14074,0.13628,0.14071,0.13357,0.143,0.14426,0.14147,0.14126,0.13435,  
0.65265,0.64497,0.65317,0.64854,0.65105,0.65375,0.64697,0.6426,0.65887  
,0.38707,0.31501,0.31347,0.32048,0.3116,0.31626,0.29941,0.28023,0.3066  
6,0.31572,0.32496,0.14212,0.14645,0.14256,0.14091,0.13741,0.14105,0.14  
379,0.14136,0.14165,0.13977,0.14437,0.13083,0.14082,0.14407,0.14584,0.  
14527,0.1479,0.13762,0.65033,0.65907,0.64532,0.66417,0.65155,0.64857,0.  
.64178,0.37802,0.35573,0.31423,0.31032,0.28852,0.31072,0.33131,0.33839  
,0.33396,0.34915,0.32181,0.32099,0.31956,0.14486,0.15032,0.13523,0.140  
36,0.14299,0.14124,0.13637,0.14271,0.14246,0.13276,0.14234,0.13531,0.1  
3658,0.13238,0.14052,0.14064,0.15207,0.14091,0.66479,0.65923,0.64786,0.  
.65603,0.65151,0.64813,0.38362,0.30046,0.40463,0.48256,0.37794,0.2805,

0.28996,0.34645,0.28319,0.31421,0.35026,0.33107,0.3258,0.32377,0.14231  
,0.14604,0.13515,0.14053,0.13641,0.13863,0.13835,0.14296,0.14096,0.141  
05,0.14007,0.14031,0.13734,0.13978,0.14122,0.14253,0.14091,0.14121,0.6  
4742,0.65357,0.64657,0.66122,0.65916,0.38022,0.36049,0.37925,0.39771,0  
.37909,0.3815,0.307,0.32362,0.3103,0.3115,0.30231,0.33329,0.3299,0.285  
53,0.32699,0.135,0.1327,0.13866,0.14016,0.1425,0.14627,0.14344,0.14093  
,0.14268,0.14254,0.14551,0.14459,0.14046,0.14114,0.13986,0.14984,0.140  
94,0.14089,0.65576,0.65005,0.64523,0.33285,0.40173,0.38531,0.34488,0.3  
9453,0.37897,0.37574,0.36945,0.32403,0.28852,0.31589,0.31101,0.26194,0  
.30285,0.28487,0.28144,0.31203,0.1379,0.14077,0.14056,0.14495,0.14083,  
0.14441,0.13569,0.13725,0.14144,0.14077,0.14607,0.14049,0.13519,0.1342  
9,0.143,0.13447,0.14252,0.14064,0.64999,0.37977,0.37717,0.43902,0.4423  
6,0.37194,0.36623,0.4035,0.38211,0.38168,0.33876,0.35158,0.3224,0.3055  
,0.31734,0.30339,0.32025,0.32781,0.30728,0.14229,0.14516,0.15019,0.141  
41,0.14208,0.14345,0.12792,0.1418,0.14059,0.14063,0.1406,0.141,0.15019  
,0.14495,0.14952,0.14028,0.14317,0.10813,0.39329,0.3809,0.40915,0.3825  
9,0.3405,0.35229,0.37978,0.35018,0.36762,0.42135,0.30984,0.32057,0.327  
12,0.34556,0.31103,0.30016,0.33414,0.33124,0.30021,0.14514,0.1384,0.14  
26,0.13957,0.14125,0.14058,0.14462,0.14339,0.12212,0.14171,0.14102,0.1  
431,0.14136,0.14292,0.13049,0.13356,0.14137,0.10875,0.42696,0.43095,0.  
37769,0.33815,0.33038,0.36891,0.38155,0.38188,0.38583,0.3773,0.3062,0.  
31195,0.30077,0.30231,0.29668,0.31281,0.27715,0.29635,0.14065,0.13159,  
0.14108,0.14321,0.1408,0.13507,0.14041,0.13901,0.13866,0.14004,0.14056  
,0.14073,0.1415,0.14265,0.1355,0.14118,0.14305,0.1377,0.10784,0.33351,  
0.40272,0.42812,0.37888,0.38057,0.38332,0.39725,0.38524,0.34634,0.3794  
,0.2974,0.32724,0.32247,0.3164,0.30944,0.31775,0.31762,0.32749,0.1382,  
0.14199,0.14067,0.13601,0.15391,0.14067,0.14084,0.14076,0.14018,0.1453  
6,0.13981,0.14303,0.14568,0.13516,0.1416,0.14115,0.14068,0.10834,0.108  
25,0.10795,0.28368,0.38092,0.34648,0.37962,0.332,0.38176,0.37522,0.405  
96,0.40539,0.33881,0.2764,0.28863,0.29463,0.30493,0.31245,0.13893,0.14  
61,0.14261,0.14053,0.14142,0.14781,0.13558,0.13782,0.14124,0.14071,0.1  
514,0.14282,0.13637,0.13644,0.14151,0.14741,0.13955,0.14138,0.1079,0.1  
0816,0.1084,0.10817,0.37898,0.33791,0.39032,0.38091,0.38004,0.38147,0.  
40282,0.37466,0.38491,0.30447,0.31186,0.28413,0.14115,0.14227,0.14119,  
0.13463,0.14362,0.1404,0.14122,0.15211,0.14085,0.14092,0.13894,0.16337  
,0.13394,0.14317,0.14096,0.14116,0.13897,0.14087,0.12916,0.14059,0.108  
06,0.10787,0.10866,0.10839,0.10853,0.1082,0.342,0.30936,0.4069,0.38288  
,0.36661,0.38397,0.42134,0.38249,0.13547,0.1369,0.14242,0.14702,0.1383  
7,0.14145,0.14048,0.13773,0.14615,0.1404,0.13652,0.14672,0.14095,0.142  
87,0.14318,0.14125,0.13992,0.14079,0.13868,0.14498,0.14148,0.14003,0.1  
4486,0.10811,0.1079,0.10848,0.10799,0.10838,0.10801,0.45149,0.37905,0.  
37953,0.4231,0.40552,0.10813,0.10839,0.14095,0.13987,0.14519,0.13915,0  
.14032,0.13452,0.13625,0.13806,0.14193,0.13875,0.1354,0.13806,0.14388,  
0.14213,0.14105,0.14369,0.14301,0.14573,0.13259,0.13907,0.14099,0.1079  
9,0.10814,0.10793,0.10807,0.10778,0.10848,0.10819,0.10834,0.10845,0.10  
813,0.38575,0.37989,0.10834,0.10798,0.10843,0.10838,0.13996,0.14228,0.  
13976,0.13848,0.13106,0.14723,0.14325,0.14085,0.14108,0.14038,0.14015,  
0.14043,0.13289,0.13776,0.14394,0.14109,0.1405,0.14729,0.13885,0.10846  
,0.10825,0.10799,0.10867,0.10782,0.10785,0.10828,0.10834,0.10828,0.108  
33,0.10797,0.10853,0.10823,0.10856,0.10832,0.10841,0.10892,0.14114,0.1  
3963,0.15098,0.14685,0.14053,0.14109,0.13767,0.14949,0.14815,0.13779,0  
.14406,0.14119,0.14102,0.14069,0.14073,0.14091,0.1082,0.10814,0.10748,

0.10804,0.10798,0.10793,0.1082,0.1083,0.10872,0.10812,0.10821,0.1082,0.1085,0.10838,0.1086,0.10853,0.10852,0.10849,0.10843,0.13274,0.14079,0.12937,0.14172,0.14081,0.14113,0.13979,0.13541,0.1414,0.14093,0.14421,0.14057,0.13651,0.10814,0.108,0.10825,0.10836,0.10821,0.10857,0.10827,0.1082,0.10818,0.10809,0.10801,0.10799,0.10828,0.10843,0.10891,0.10844,0.10856,0.10831,0.10804,0.10829,0.10861,0.14125,0.1407,0.14105,0.14365,0.13796,0.14678,0.14126,0.14512,0.14572,0.10855,0.10874,0.10815,0.10812,0.10825,0.10837,0.10776,0.10831,0.10815,0.10871,0.10792,0.10782,0.10817,0.10843,0.10824,0.1083,0.10821,0.10802,0.10829,0.10841,0.10872,0.10791,0.10819,0.10793,0.10832,0.14573,0.14351,0.13783,0.13751,0.10832,0.10845,0.10897,0.10824,0.10851,0.1081,0.10822,0.10838,0.10814,0.1084,0.10805,0.1084,0.10791,0.10844,0.10764,0.10872,0.10798,0.10849,0.10763,0.10813,0.10888,0.1081,0.10783,0.10832,0.10786,0.1083,0.10821,0.10781,0.1081,0.10847,0.10814,0.10802,0.1081,0.10821,0.10839,0.10845,0.10836,0.10829,0.10855,0.10775,0.10802,0.10785,0.10823,0.10783,0.10809,0.10778,0.10809,0.1081,0.10841,0.10824,0.10822,0.10828,0.10836,0.10778,0.10806,0.10828,0.10802,0.10818,0.10774,0.10802,0.10806,0.10872,0.10763,0.10815,0.10789,0.10831,0.1079,0.10804,0.10821,0.10868,0.10819,0.10822,0.10825,0.10877,0.10843,0.10864,0.10814,0.1084,0.10788,0.1079,0.10843,0.10858,0.1088,0.10796,0.10788,0.10805,0.10869,0.10784,0.10855,0.10824,0.1083,0.10796,0.10828,0.10866,0.10857,0.10784,0.10846,0.10838,0.10816,0.10806,0.10824,0.10822,0.1086,0.10834,0.10824,0.10814,0.10823,0.10771,0.10836,0.10863,0.10816,0.10787,0.10832,0.10888,0.10805,0.10896,0.10821,0.1084,0.108,0.1078,0.10834,0.10824,0.10791,0.10798,0.10859,0.10862,0.1081,0.1082,0.10872,0.10809,0.10804,0.1089,0.10838,0.10855,0.10808,0.10858,0.1081,0.10766,0.10803,0.10826,0.1083,0.10825,0.10843,0.10807,0.10813,0.10814,0.10823,0.10807,0.10794,0.10861,0.10823,0.10873,0.10818,0.10839,0.1083,0.10835,0.10849,0.10797,0.10804,0.10807,0.10789,0.10831,0.10878,0.10839,0.1085,0.1084,0.10864,0.10792,0.10827,0.1082,0.10797,0.10868,0.10816,0.10869,0.10808,0.10825,0.10863,0.10848,0.10828,0.10814,0.10789,0.10851,0.10801,0.10812,0.10786,0.10835,0.10828,0.10838,0.10832,0.10828,0.10898,0.10836,0.10832,0.10796,0.10749  
0.18136,0.18173,0.18109,0.18102,0.18071,0.18246,0.1809,0.18093,0.18084,0.18206,0.18071,0.18063,0.18172,0.18162,0.18039,0.18217,0.18148,0.18175,0.18106,0.1815,0.34921,0.39176,0.36435,0.35341,0.18167,0.18121,0.18118,0.18104,0.18122,0.18118,0.18093,0.1824,0.18101,0.18119,0.1813,0.18138,0.18138,0.18105,0.18056,0.53691,0.36286,0.39838,0.35982,0.35342,0.37004,0.36815,0.1822,0.18202,0.18013,0.18062,0.18274,0.18041,0.18147,0.18085,0.18134,0.18068,0.1807,0.18221,0.18141,0.18071,0.18147,0.54353,0.54342,0.34852,0.29917,0.36708,0.31218,0.35803,0.36624,0.36046,0.36123,0.18146,0.18191,0.18172,0.18165,0.18129,0.18049,0.18159,0.18106,0.18113,0.18073,0.18147,0.18107,0.18147,0.18088,0.181,0.53561,0.54366,0.54442,0.35795,0.3902,0.34567,0.36218,0.36102,0.36059,0.37195,0.36835,0.37096,0.18121,0.18154,0.1816,0.18062,0.18125,0.1812,0.18134,0.18133,0.18061,0.18056,0.18284,0.18174,0.18083,0.18253,0.18066,0.1814,0.54858,0.54694,0.53918,0.54153,0.38555,0.37995,0.35229,0.38562,0.35462,0.32537,0.37737,0.36792,0.31692,0.34148,0.18182,0.18118,0.1809,0.18173,0.18139,0.18095,0.18138,0.18162,0.18123,0.18203,0.18069,0.18147,0.18068,0.18056,0.1812,0.18026,0.54343,0.54502,0.54866,0.5373,0.54717,0.54437,0.36039,0.3713,0.34873,0.38106,0.3604,0.38797,0.40179,0.37304,0.43919,0.35882,0.18077,0.18168,0.18127,0.18192,0.18168,0.18084,0.18104,0.18236,0.1812,0.18108,0.18096,0.18241,0.18036,0.18157,0.18088,0.18145,0.18092,0.

52882,0.54128,0.53088,0.54215,0.53837,0.54287,0.36563,0.38555,0.36226,  
0.36056,0.36299,0.36692,0.35912,0.3859,0.40098,0.3959,0.37757,0.18254,  
0.18096,0.18126,0.18066,0.18142,0.18144,0.18203,0.18113,0.18191,0.1816  
3,0.18185,0.1822,0.1817,0.13946,0.14491,0.14295,0.18128,0.53462,0.5371  
3,0.54175,0.54624,0.54903,0.55746,0.54877,0.36262,0.3562,0.38901,0.365  
92,0.3326,0.3291,0.36602,0.34065,0.33201,0.32928,0.39121,0.18075,0.180  
66,0.18173,0.18027,0.17977,0.1811,0.18188,0.18072,0.18168,0.18162,0.18  
124,0.14167,0.12835,0.13859,0.14171,0.1409,0.13455,0.18055,0.54673,0.5  
614,0.54502,0.54337,0.54058,0.5367,0.54176,0.39679,0.36702,0.36808,0.3  
7514,0.33229,0.41329,0.38002,0.36325,0.36385,0.35624,0.3942,0.18237,0.  
18096,0.18168,0.18141,0.18111,0.1811,0.18059,0.18026,0.18101,0.14042,0  
.14074,0.14281,0.14083,0.14074,0.14098,0.1421,0.14003,0.1448,0.18158,0  
.54228,0.54617,0.53389,0.53879,0.53936,0.53345,0.55143,0.38157,0.36456  
,0.36643,0.36074,0.39635,0.40819,0.35446,0.38416,0.36177,0.39209,0.365  
91,0.31182,0.18232,0.18217,0.18156,0.18161,0.18228,0.18098,0.14118,0.1  
3923,0.14018,0.14032,0.14538,0.14783,0.14048,0.13172,0.14119,0.14207,0  
.14192,0.1297,0.54677,0.54528,0.541,0.54313,0.54989,0.54505,0.54843,0.  
34598,0.3586,0.39979,0.36324,0.32654,0.37989,0.3772,0.38638,0.34274,0.  
4198,0.37546,0.36907,0.18179,0.18159,0.18136,0.14716,0.13747,0.14629,0  
.14077,0.14094,0.13734,0.1364,0.1408,0.14573,0.1417,0.13373,0.13528,0.  
14478,0.14081,0.1407,0.5382,0.54207,0.54673,0.53596,0.54023,0.53539,0.  
54954,0.55527,0.55353,0.36211,0.37447,0.36262,0.39176,0.36473,0.36127,  
0.35776,0.35938,0.37992,0.41301,0.36235,0.14059,0.13905,0.14328,0.1358  
4,0.14079,0.14095,0.14205,0.14232,0.13673,0.12459,0.14438,0.13264,0.14  
245,0.14146,0.14127,0.14473,0.14402,0.14001,0.54183,0.54768,0.54887,0.  
54167,0.54633,0.54145,0.54742,0.54226,0.53057,0.3604,0.29748,0.27997,0  
.25597,0.27542,0.26108,0.27336,0.28045,0.27246,0.2907,0.27497,0.14835,  
0.14184,0.14179,0.14048,0.13275,0.14178,0.13683,0.13921,0.14862,0.1410  
4,0.13539,0.14067,0.13198,0.14352,0.14544,0.14131,0.14123,0.13279,0.54  
508,0.53323,0.5412,0.53836,0.54065,0.54362,0.5407,0.53422,0.55007,0.32  
851,0.27909,0.27675,0.28378,0.2774,0.27913,0.26482,0.2508,0.27061,0.28  
031,0.28653,0.14246,0.14763,0.14331,0.14097,0.13672,0.14083,0.14475,0.  
142,0.14195,0.13973,0.14531,0.12853,0.14091,0.14501,0.14714,0.14645,0.  
15006,0.13731,0.54303,0.55029,0.53705,0.5585,0.54579,0.54296,0.53369,0  
.32101,0.30009,0.26699,0.27473,0.25773,0.27359,0.29422,0.29285,0.29486  
,0.30529,0.28104,0.28061,0.28014,0.14553,0.15253,0.1338,0.1402,0.14372  
,0.14121,0.13557,0.14295,0.14274,0.13097,0.14287,0.13398,0.13563,0.130  
57,0.1406,0.14121,0.15491,0.14082,0.55544,0.54979,0.5371,0.54819,0.543  
89,0.53583,0.32818,0.25801,0.3418,0.40537,0.32163,0.25198,0.25698,0.30  
466,0.25674,0.27712,0.30872,0.28882,0.28507,0.28491,0.14251,0.14738,0.  
13353,0.14052,0.13548,0.13849,0.1378,0.14351,0.14116,0.14148,0.13979,0  
.14046,0.13665,0.13957,0.14147,0.14302,0.14099,0.14123,0.54036,0.54647  
,0.53886,0.5516,0.55052,0.32156,0.30403,0.32311,0.33668,0.3216,0.32187  
,0.27258,0.28364,0.27522,0.27595,0.26578,0.29242,0.29045,0.25588,0.286  
06,0.13375,0.13101,0.13815,0.14047,0.14303,0.14743,0.14414,0.14122,0.1  
4339,0.14301,0.14657,0.14589,0.14076,0.14145,0.13992,0.15225,0.14101,0  
.14099,0.54472,0.53852,0.53409,0.28374,0.33886,0.32691,0.28936,0.33668  
,0.3207,0.3197,0.3144,0.28218,0.25796,0.27574,0.27454,0.23593,0.2698,0  
.25341,0.2525,0.27482,0.13723,0.14083,0.14064,0.14621,0.14072,0.14552,  
0.13434,0.13655,0.14158,0.14102,0.14748,0.14076,0.13421,0.13261,0.1434  
5,0.13342,0.14323,0.14059,0.54049,0.32206,0.31986,0.37082,0.37063,0.31  
516,0.31163,0.34129,0.32364,0.32249,0.29634,0.30839,0.28536,0.27236,0.

28141,0.26722,0.2826,0.28769,0.27195,0.14275,0.14662,0.15299,0.14151,0.14252,0.144,0.12507,0.14204,0.14051,0.14064,0.14058,0.14084,0.15245,0.1462,0.15174,0.1404,0.14379,0.10045,0.33087,0.32111,0.34312,0.32389,0.29092,0.29861,0.31857,0.2981,0.31051,0.35499,0.27377,0.28041,0.2884,0.3036,0.27409,0.26645,0.28919,0.28981,0.26773,0.14611,0.13777,0.14313,0.13924,0.14124,0.14091,0.14571,0.14426,0.11773,0.14166,0.14145,0.14372,0.14132,0.14324,0.12829,0.13165,0.14172,0.10103,0.35974,0.36524,0.3207,0.28858,0.28014,0.31206,0.32182,0.32104,0.3263,0.31969,0.27007,0.27504,0.26712,0.26819,0.26444,0.27844,0.24843,0.26292,0.14073,0.12928,0.14112,0.14356,0.14075,0.13395,0.14072,0.13859,0.13814,0.13985,0.1406,0.14072,0.14131,0.14336,0.13454,0.14147,0.14392,0.13712,0.10009,0.2828,0.34114,0.36225,0.31921,0.32275,0.32448,0.33407,0.32688,0.29457,0.32047,0.26335,0.28442,0.28257,0.27775,0.27535,0.2799,0.27934,0.28517,0.13759,0.14183,0.1406,0.13476,0.15718,0.14047,0.14076,0.14057,0.14023,0.14619,0.13953,0.14372,0.14696,0.13384,0.14209,0.14105,0.14077,0.10077,0.10062,0.10041,0.24327,0.32256,0.29567,0.32272,0.28226,0.32483,0.31954,0.34194,0.3414,0.29559,0.24897,0.25839,0.2603,0.26973,0.27601,0.13841,0.14755,0.14284,0.14072,0.14151,0.14958,0.13456,0.1374,0.14116,0.14082,0.15421,0.14334,0.13533,0.13559,0.14167,0.14896,0.13941,0.14161,0.1001,0.10045,0.10085,0.10071,0.32132,0.28832,0.33075,0.32202,0.32315,0.32053,0.33917,0.31747,0.32688,0.27198,0.27414,0.25416,0.14112,0.14277,0.14142,0.13337,0.14443,0.14061,0.14144,0.15486,0.14104,0.14094,0.13829,0.16938,0.13233,0.14375,0.14103,0.14139,0.13863,0.14095,0.12661,0.14066,0.10017,0.10022,0.10099,0.10083,0.10081,0.10043,0.29169,0.26578,0.3451,0.3243,0.31108,0.32472,0.35473,0.32277,0.13419,0.13565,0.14292,0.1489,0.1379,0.14171,0.14099,0.13723,0.14769,0.14039,0.13553,0.14818,0.14107,0.14365,0.14367,0.1412,0.13966,0.14098,0.13792,0.14602,0.14151,0.14027,0.1457,0.10045,0.10026,0.10086,0.10019,0.10056,0.10031,0.37942,0.32112,0.32035,0.35481,0.34276,0.1005,0.1006,0.14128,0.14013,0.14623,0.13868,0.14063,0.13314,0.13504,0.13749,0.14217,0.13852,0.13405,0.13788,0.14483,0.14269,0.14142,0.14426,0.14383,0.14701,0.13053,0.13883,0.14126,0.10016,0.10042,0.10022,0.10037,0.1003,0.10087,0.10052,0.10083,0.10068,0.10064,0.32742,0.32281,0.10076,0.10041,0.1008,0.10066,0.14018,0.14273,0.13958,0.13788,0.12899,0.14909,0.14386,0.1411,0.14103,0.1407,0.14028,0.14038,0.13101,0.13712,0.14462,0.14091,0.14061,0.14898,0.13831,0.10081,0.10079,0.10028,0.10095,0.09995,0.10026,0.10073,0.1005,0.10066,0.10066,0.10029,0.10092,0.10074,0.10104,0.10061,0.10072,0.10125,0.1411,0.13943,0.1536,0.14819,0.14022,0.14097,0.13703,0.1514,0.15016,0.13745,0.14493,0.14138,0.14107,0.14091,0.14073,0.14098,0.10059,0.10036,0.10006,0.10061,0.10035,0.10019,0.1004,0.1007,0.10095,0.1006,0.10059,0.10041,0.10067,0.10076,0.10078,0.10078,0.10091,0.10056,0.10066,0.13123,0.14084,0.12652,0.14203,0.14098,0.14107,0.13973,0.13405,0.14119,0.14071,0.14495,0.14072,0.13552,0.1003,0.10065,0.10043,0.10073,0.10047,0.10095,0.10068,0.10053,0.10057,0.1003,0.10046,0.10021,0.10074,0.10083,0.10111,0.10079,0.1009,0.10069,0.10059,0.10061,0.101,0.14136,0.14092,0.14115,0.14438,0.13744,0.14833,0.1413,0.14625,0.14671,0.10069,0.10123,0.10071,0.10043,0.1006,0.10061,0.10014,0.10076,0.10029,0.10109,0.10062,0.1001,0.10067,0.10095,0.1005,0.10068,0.10047,0.10015,0.10074,0.10067,0.101,0.10026,0.10058,0.10066,0.10086,0.14682,0.14458,0.13705,0.13666,0.10054,0.10063,0.10121,0.10052,0.10085,0.10041,0.10043,0.10071,0.10049,0.10069,0.1003,0.10077,0.1006,0.1008,0.10023,0.10102,0.10051,0.10066,0.099907,0.10049,0.10124,0.10035,0.10044,0.10069,0.10027,0.10086,0.10056,0.10

043,0.10066,0.10074,0.10054,0.10028,0.10046,0.10042,0.10063,0.10088,0.  
10071,0.10055,0.10076,0.10022,0.10033,0.10011,0.10029,0.10043,0.10042,  
0.10025,0.10048,0.1005,0.10055,0.10056,0.10048,0.10053,0.10071,0.10012  
,0.10055,0.10062,0.10034,0.10056,0.10002,0.1003,0.10038,0.1011,0.09995  
7,0.10028,0.10033,0.10068,0.10035,0.10045,0.10038,0.10128,0.10057,0.10  
053,0.10063,0.10098,0.10075,0.10072,0.10061,0.10053,0.10021,0.10028,0.  
1007,0.10107,0.10115,0.10016,0.10019,0.10031,0.10104,0.10006,0.10062,0  
.10077,0.10062,0.10033,0.10055,0.10109,0.10092,0.10035,0.10082,0.10075  
,0.10071,0.1003,0.10072,0.1007,0.10077,0.10086,0.10081,0.10047,0.10049  
,0.099837,0.10055,0.10071,0.10068,0.10026,0.10049,0.10106,0.10042,0.10  
141,0.10066,0.10075,0.10015,0.10019,0.10064,0.10079,0.10014,0.10022,0.  
10056,0.10086,0.1004,0.10036,0.1011,0.10043,0.10032,0.10111,0.10072,0.  
10084,0.10034,0.10099,0.10043,0.10009,0.10036,0.10066,0.10082,0.10062,  
0.10076,0.10041,0.10057,0.10067,0.10065,0.10047,0.10025,0.10085,0.1006  
7,0.10118,0.10061,0.10055,0.10052,0.10081,0.10078,0.10023,0.10034,0.10  
052,0.10014,0.10081,0.10133,0.10053,0.10084,0.10072,0.10101,0.10044,0.  
10067,0.10058,0.10044,0.1008,0.10066,0.1011,0.1004,0.1004,0.10102,0.10  
084,0.10078,0.10044,0.10019,0.10081,0.10045,0.10041,0.10029,0.10074,0.  
10074,0.10066,0.10065,0.10039,0.10133,0.10066,0.10074,0.10048,0.099853  
0.18664,0.18683,0.18637,0.1865,0.18636,0.18749,0.18641,0.18654,0.18643  
,0.18725,0.18654,0.18661,0.18693,0.18686,0.18637,0.18762,0.18677,0.187  
31,0.18685,0.18662,0.31982,0.35712,0.33374,0.32496,0.18704,0.18666,0.1  
8671,0.18661,0.18695,0.1868,0.18666,0.18766,0.18649,0.18676,0.18691,0.  
18696,0.18702,0.18656,0.18619,0.47115,0.33254,0.35876,0.33014,0.32449,  
0.33943,0.33607,0.18774,0.18731,0.18576,0.18623,0.1881,0.1862,0.18693,  
0.18615,0.18656,0.1857,0.18602,0.1875,0.18665,0.18634,0.18632,0.47707,  
0.47515,0.31905,0.28259,0.33696,0.2903,0.32635,0.33417,0.33018,0.33049  
,0.18676,0.18719,0.18724,0.18714,0.18703,0.186,0.18696,0.18682,0.18674  
,0.18625,0.18775,0.18641,0.18719,0.18661,0.1867,0.46694,0.47426,0.4798  
3,0.32936,0.35501,0.31669,0.33061,0.33094,0.33052,0.33968,0.33596,0.33  
795,0.18655,0.18704,0.18697,0.18597,0.18681,0.18661,0.18687,0.18729,0.  
18597,0.18611,0.18815,0.18732,0.18672,0.18769,0.18643,0.18661,0.48108,  
0.48203,0.46927,0.47676,0.34988,0.34512,0.32462,0.34981,0.32601,0.3032  
8,0.34522,0.33634,0.29669,0.31329,0.18735,0.18622,0.18648,0.18716,0.18  
69,0.18663,0.18678,0.18649,0.187,0.18752,0.18648,0.18696,0.18655,0.185  
93,0.1864,0.18542,0.47562,0.47988,0.48265,0.46859,0.47982,0.47317,0.33  
066,0.34097,0.32117,0.34749,0.32828,0.35285,0.36456,0.34079,0.39291,0.  
32885,0.18606,0.18709,0.18674,0.18726,0.18723,0.18636,0.18652,0.18758,  
0.18659,0.18657,0.18616,0.18764,0.18565,0.187,0.18646,0.18649,0.18642,  
0.46195,0.47383,0.46597,0.4751,0.47057,0.47119,0.33379,0.34909,0.33201  
,0.32949,0.33247,0.33662,0.33023,0.35025,0.3621,0.35974,0.34344,0.1878  
2,0.18636,0.18678,0.18594,0.18726,0.18701,0.18739,0.18654,0.18679,0.18  
695,0.18714,0.18707,0.18682,0.13806,0.14425,0.14222,0.18671,0.47087,0.  
47029,0.47242,0.48129,0.48332,0.48982,0.47798,0.33276,0.32553,0.35416,  
0.3355,0.3084,0.30483,0.33603,0.31401,0.30665,0.30469,0.35495,0.18678,  
0.1857,0.18698,0.18573,0.18534,0.18696,0.18724,0.18585,0.18678,0.18707  
,0.18693,0.14047,0.12491,0.1371,0.14035,0.13957,0.13202,0.18591,0.4809  
3,0.49575,0.47887,0.47881,0.47317,0.47273,0.47732,0.35803,0.33544,0.33  
696,0.34146,0.30883,0.37206,0.3454,0.3324,0.33338,0.32697,0.35931,0.18  
825,0.18638,0.18696,0.1867,0.18675,0.18608,0.18589,0.18588,0.18618,0.1  
3919,0.13958,0.14216,0.13974,0.13955,0.13965,0.14074,0.13835,0.14419,0  
.18722,0.47357,0.4807,0.46847,0.47318,0.47415,0.47085,0.48441,0.34734,



0.33295,0.33487,0.33029,0.35923,0.37363,0.32524,0.35249,0.33108,0.3549  
1,0.33275,0.291,0.18746,0.18775,0.18673,0.18716,0.18778,0.18676,0.1397  
4,0.13759,0.13887,0.139,0.14466,0.14757,0.1392,0.12911,0.13984,0.14121  
,0.14101,0.12652,0.47699,0.47668,0.47327,0.47454,0.48288,0.47387,0.480  
74,0.31882,0.32811,0.3599,0.33194,0.30391,0.34764,0.34091,0.3494,0.313  
15,0.37888,0.34343,0.33674,0.18765,0.18688,0.18639,0.14701,0.13567,0.1  
4597,0.13959,0.13955,0.13555,0.13432,0.13958,0.14521,0.14066,0.13167,0  
.13327,0.14419,0.13936,0.13956,0.4732,0.47792,0.4762,0.46799,0.47247,0  
.46706,0.48347,0.48542,0.48418,0.33422,0.34127,0.33197,0.35673,0.33314  
,0.3318,0.32675,0.32918,0.34664,0.37228,0.33112,0.13923,0.13734,0.1424  
5,0.1339,0.13967,0.13961,0.14146,0.14122,0.13476,0.12061,0.14399,0.130  
22,0.14114,0.14024,0.14032,0.14383,0.14311,0.13867,0.4769,0.48402,0.47  
524,0.47344,0.47823,0.47594,0.48078,0.46978,0.46842,0.33059,0.28031,0.  
25701,0.23362,0.25181,0.23897,0.25122,0.25589,0.25065,0.26337,0.25269,  
0.14861,0.14085,0.14062,0.13937,0.13005,0.14063,0.13495,0.13787,0.1489  
2,0.13995,0.13313,0.1397,0.1292,0.14292,0.14487,0.13991,0.13997,0.1300  
4,0.4753,0.46819,0.47576,0.47187,0.47369,0.47471,0.4711,0.46692,0.4817  
9,0.29145,0.25674,0.25298,0.26124,0.25431,0.25452,0.24418,0.23171,0.24  
73,0.25756,0.26206,0.1412,0.14763,0.14244,0.13954,0.1346,0.13962,0.144  
28,0.14081,0.14103,0.13865,0.14459,0.12519,0.13926,0.14456,0.14732,0.1  
4588,0.15035,0.13551,0.47538,0.48315,0.47132,0.49332,0.47596,0.47838,0  
.4688,0.28349,0.26676,0.23724,0.25149,0.23725,0.24991,0.2701,0.26588,0  
.27018,0.27776,0.25722,0.25553,0.25516,0.14494,0.1532,0.13107,0.13889,  
0.14298,0.13988,0.13354,0.14215,0.14175,0.12808,0.14202,0.13148,0.1334  
9,0.12768,0.13923,0.14025,0.15582,0.13937,0.48925,0.47939,0.47057,0.48  
101,0.47812,0.46955,0.29109,0.2288,0.303,0.35691,0.28379,0.23386,0.237  
4,0.27921,0.23901,0.25398,0.28261,0.26098,0.25808,0.25865,0.14138,0.14  
688,0.13119,0.13926,0.13309,0.13674,0.13595,0.1429,0.13989,0.14008,0.1  
3862,0.13943,0.1347,0.13836,0.14019,0.14237,0.13964,0.14001,0.47432,0.  
47931,0.47522,0.47983,0.47615,0.28385,0.26963,0.28458,0.29591,0.28306,  
0.28303,0.25048,0.25836,0.25152,0.25147,0.24463,0.26708,0.26563,0.2365  
6,0.25932,0.1314,0.12798,0.13654,0.1392,0.14215,0.14762,0.14338,0.1402  
1,0.14217,0.14184,0.14623,0.14556,0.13963,0.14026,0.13852,0.15302,0.13  
978,0.13982,0.4776,0.47739,0.46749,0.25166,0.30127,0.29081,0.25798,0.2  
9724,0.28456,0.28295,0.27799,0.25597,0.23746,0.2519,0.25101,0.21963,0.  
24884,0.23231,0.2344,0.25107,0.13519,0.13924,0.13959,0.14578,0.1394,0.  
14508,0.13185,0.13431,0.14017,0.13998,0.14711,0.13969,0.13215,0.12991,  
0.1428,0.13094,0.14237,0.13956,0.47304,0.28605,0.28291,0.32688,0.32601  
,0.27787,0.27519,0.3032,0.28795,0.28694,0.26946,0.28001,0.26115,0.2514  
4,0.25665,0.24538,0.25715,0.26058,0.24933,0.14153,0.14613,0.15357,0.14  
037,0.14143,0.14336,0.12113,0.1408,0.13946,0.1396,0.13927,0.13971,0.15  
317,0.146,0.15229,0.13923,0.14311,0.092579,0.29258,0.28272,0.30343,0.2  
8774,0.25884,0.26552,0.28297,0.2641,0.27573,0.31421,0.24895,0.25482,0.  
2631,0.27679,0.24998,0.24439,0.26137,0.26138,0.24668,0.1457,0.13612,0.  
14216,0.13788,0.13989,0.13962,0.14508,0.1437,0.11275,0.14024,0.1403,0.  
14312,0.14049,0.14234,0.12474,0.12905,0.14088,0.093197,0.31632,0.32437  
,0.28218,0.25541,0.24928,0.27748,0.28311,0.28249,0.28999,0.28232,0.247  
5,0.25155,0.24478,0.24578,0.24365,0.25466,0.2294,0.24244,0.13956,0.125  
95,0.14003,0.14267,0.13953,0.1316,0.13942,0.13714,0.13625,0.13832,0.13  
919,0.13945,0.14003,0.14256,0.13209,0.14022,0.14325,0.13511,0.09212,0.  
25018,0.30127,0.31817,0.28191,0.28564,0.28806,0.29278,0.2875,0.26129,0  
.28298,0.24201,0.25774,0.25726,0.25156,0.25222,0.25537,0.25447,0.25852

,0.1359,0.14064,0.13932,0.13244,0.15925,0.13921,0.13946,0.13943,0.1389  
9,0.14565,0.13822,0.14302,0.1468,0.13132,0.14119,0.13999,0.13915,0.092  
67,0.092683,0.09228,0.21662,0.28563,0.2617,0.28596,0.25021,0.28709,0.2  
8248,0.30176,0.3032,0.26757,0.23037,0.23882,0.23834,0.24704,0.25294,0.  
1367,0.14747,0.14196,0.13933,0.14017,0.14986,0.13215,0.13561,0.13966,0  
.13948,0.15514,0.14229,0.13307,0.13363,0.14021,0.14905,0.138,0.14028,0  
.091933,0.092515,0.093065,0.092642,0.28461,0.257,0.29166,0.2876,0.2860  
6,0.28555,0.29937,0.28173,0.28721,0.25196,0.25172,0.23624,0.13982,0.14  
178,0.14017,0.13091,0.14365,0.13945,0.14015,0.15582,0.13989,0.13943,0.  
13666,0.17285,0.12973,0.14275,0.13981,0.14033,0.13718,0.13951,0.12301,  
0.13972,0.092254,0.092145,0.0931,0.092761,0.09269,0.092589,0.26001,0.2  
3619,0.30283,0.28381,0.27509,0.28913,0.31502,0.28619,0.13193,0.13321,0  
.14175,0.14883,0.13634,0.14069,0.14002,0.13555,0.14732,0.139,0.1332,0.  
14807,0.1397,0.14303,0.14293,0.13976,0.13834,0.13975,0.13626,0.14546,0  
.14028,0.13859,0.14557,0.092549,0.092238,0.092833,0.092375,0.092539,0.  
092323,0.33488,0.28321,0.28211,0.31251,0.30233,0.092379,0.09246,0.1403  
7,0.13873,0.1459,0.13714,0.13937,0.13066,0.13285,0.13544,0.14107,0.136  
99,0.1315,0.13613,0.14427,0.14179,0.13983,0.14366,0.14295,0.14675,0.12  
748,0.13706,0.13986,0.092279,0.092386,0.092514,0.092429,0.092274,0.093  
106,0.092785,0.092623,0.092524,0.09265,0.28956,0.28563,0.092684,0.0925  
03,0.092944,0.09251,0.13868,0.14186,0.13834,0.13624,0.12578,0.14886,0.  
1432,0.13959,0.1399,0.13963,0.13927,0.13891,0.12806,0.13559,0.14385,0.  
13967,0.13933,0.1491,0.13669,0.092775,0.092913,0.09233,0.092974,0.0918  
61,0.092468,0.09271,0.092431,0.092553,0.092692,0.092534,0.092773,0.092  
794,0.092862,0.092615,0.09248,0.093378,0.13994,0.13793,0.15422,0.14839  
,0.13863,0.13976,0.13515,0.15171,0.15047,0.13566,0.14458,0.1403,0.1397  
9,0.13963,0.13956,0.13978,0.092605,0.092447,0.092179,0.092704,0.092442  
,0.092184,0.092262,0.092842,0.093171,0.092549,0.092483,0.092491,0.0927  
06,0.092916,0.092744,0.092553,0.092887,0.092567,0.092735,0.12839,0.139  
74,0.12258,0.14099,0.13969,0.14001,0.13861,0.13159,0.14015,0.13949,0.1  
443,0.13964,0.13394,0.09232,0.092926,0.092475,0.092637,0.092221,0.0930  
78,0.092799,0.092487,0.092529,0.092435,0.092595,0.09236,0.092589,0.092  
67,0.093015,0.092583,0.092818,0.092741,0.092723,0.09272,0.0931,0.14002  
,0.13972,0.14,0.14334,0.13554,0.14827,0.1402,0.14586,0.1463,0.092799,0  
.093053,0.092752,0.092378,0.092655,0.092883,0.092212,0.092739,0.092315  
,0.093319,0.092639,0.092029,0.092717,0.092899,0.092428,0.092608,0.0924  
72,0.092216,0.092682,0.092882,0.092736,0.092426,0.092916,0.092817,0.09  
3096,0.14636,0.14372,0.13518,0.13485,0.092425,0.092517,0.092992,0.0924  
92,0.09287,0.092507,0.092182,0.092979,0.092693,0.092826,0.092264,0.092  
663,0.092733,0.092685,0.092362,0.093048,0.09267,0.092845,0.091878,0.09  
2646,0.093253,0.092311,0.092555,0.092885,0.092277,0.092948,0.092698,0.  
092385,0.092913,0.092797,0.092603,0.092387,0.092326,0.092442,0.092668,  
0.092846,0.092832,0.092551,0.092734,0.092262,0.092188,0.092137,0.09238  
7,0.092614,0.092444,0.092567,0.092239,0.092604,0.09276,0.092578,0.0924  
84,0.092547,0.092781,0.092158,0.092608,0.09276,0.092535,0.092489,0.092  
033,0.092525,0.092342,0.093041,0.091815,0.092304,0.092221,0.092741,0.0  
92596,0.092406,0.092388,0.09328,0.09256,0.092451,0.092545,0.09287,0.09  
2862,0.092577,0.09275,0.092452,0.092306,0.0924,0.092699,0.093078,0.093  
224,0.092406,0.092342,0.092579,0.093012,0.092054,0.09255,0.092704,0.09  
2488,0.092669,0.092571,0.09337,0.092669,0.092238,0.092871,0.092693,0.0  
92772,0.092219,0.092927,0.092657,0.092808,0.092756,0.09293,0.092389,0.  
092418,0.091983,0.09256,0.092833,0.09275,0.092469,0.092531,0.093102,0.

092439,0.093488,0.092774,0.092787,0.091962,0.092347,0.09257,0.09284,0.  
092175,0.092325,0.092432,0.092668,0.092286,0.092476,0.093166,0.092663,  
0.092406,0.09322,0.092723,0.092932,0.092456,0.092921,0.092503,0.092059  
,0.092304,0.092625,0.092931,0.092737,0.092907,0.092433,0.092463,0.0925  
92,0.092671,0.092619,0.09238,0.092665,0.092879,0.093107,0.092777,0.092  
64,0.092492,0.092715,0.092884,0.092392,0.092561,0.092649,0.091971,0.09  
2903,0.093218,0.092316,0.092947,0.0928,0.093093,0.092379,0.092677,0.09  
2619,0.092421,0.092873,0.092746,0.092944,0.092482,0.092199,0.092929,0.  
092767,0.092927,0.092491,0.092272,0.092747,0.092526,0.09256,0.092478,0  
.092935,0.092601,0.092535,0.092411,0.092672,0.093093,0.092514,0.092854  
,0.092521,0.092052  
0.19044,0.19108,0.19017,0.19021,0.19079,0.19126,0.19017,0.19051,0.1904  
9,0.19098,0.19086,0.19092,0.19089,0.19075,0.18993,0.19151,0.19095,0.19  
132,0.1909,0.19018,0.30024,0.33611,0.31521,0.3057,0.19115,0.19028,0.19  
011,0.19046,0.19079,0.19063,0.19024,0.19107,0.19019,0.19079,0.19057,0.  
19072,0.19079,0.19059,0.19048,0.42753,0.31293,0.33537,0.31121,0.30773,  
0.31947,0.31481,0.19135,0.19115,0.1897,0.19063,0.1923,0.18972,0.19094,  
0.18983,0.19079,0.18976,0.18995,0.19129,0.19071,0.19024,0.18993,0.4379  
9,0.43407,0.30231,0.27238,0.31746,0.27935,0.30851,0.31317,0.31147,0.31  
009,0.19083,0.19131,0.19116,0.19105,0.19135,0.19008,0.19061,0.19061,0.  
19055,0.19063,0.19174,0.1905,0.19125,0.19079,0.1905,0.42507,0.43597,0.  
438,0.30962,0.33465,0.30032,0.311,0.31246,0.31403,0.31841,0.31667,0.31  
519,0.19059,0.19104,0.19148,0.1902,0.19076,0.19103,0.19064,0.19109,0.1  
8969,0.19035,0.19203,0.19128,0.19066,0.19179,0.19089,0.19051,0.44026,0  
.44176,0.43214,0.43521,0.32693,0.32337,0.30712,0.32671,0.30656,0.28835  
,0.32384,0.3173,0.28496,0.29636,0.19134,0.18956,0.19088,0.19118,0.1911  
4,0.19077,0.1908,0.19018,0.19089,0.19143,0.19009,0.19062,0.19073,0.189  
74,0.19008,0.1895,0.43575,0.43651,0.44005,0.42814,0.43725,0.43353,0.31  
26,0.3225,0.30566,0.32642,0.30846,0.33188,0.33965,0.32304,0.36478,0.30  
939,0.19011,0.19098,0.19062,0.19107,0.19074,0.19082,0.19024,0.19203,0.  
19063,0.19065,0.19023,0.19154,0.18978,0.19088,0.19073,0.19064,0.19076,  
0.41988,0.43435,0.42507,0.43195,0.43406,0.43125,0.31563,0.32651,0.3142  
3,0.31161,0.31353,0.31569,0.31014,0.32931,0.33979,0.33713,0.32509,0.19  
171,0.19024,0.19071,0.19007,0.19129,0.19076,0.19148,0.19066,0.19044,0.  
19106,0.1913,0.19113,0.1906,0.13625,0.14319,0.1403,0.19078,0.43131,0.4  
2537,0.43519,0.4402,0.43857,0.44815,0.43493,0.31294,0.30667,0.33047,0.  
31807,0.29127,0.29154,0.31646,0.29798,0.29086,0.29049,0.33354,0.19062,  
0.18994,0.19101,0.19008,0.18935,0.19072,0.19118,0.19002,0.19097,0.1910  
8,0.19059,0.13881,0.1212,0.13513,0.13867,0.13783,0.12913,0.19019,0.438  
21,0.45059,0.43827,0.43904,0.43486,0.4293,0.43379,0.33547,0.31436,0.31  
745,0.32129,0.29263,0.34591,0.32547,0.31514,0.31719,0.30835,0.33751,0.  
19179,0.19063,0.19107,0.19069,0.19058,0.1895,0.18962,0.1902,0.19053,0.  
13757,0.1378,0.14073,0.13799,0.13795,0.1378,0.13907,0.13634,0.14301,0.  
19083,0.43382,0.43609,0.42712,0.43404,0.43565,0.43214,0.43985,0.32522,  
0.31186,0.31452,0.31218,0.33745,0.34782,0.31029,0.32987,0.3128,0.33142  
,0.31319,0.27974,0.19151,0.19132,0.19085,0.19115,0.19166,0.19054,0.137  
95,0.13605,0.13683,0.13746,0.14368,0.14653,0.13744,0.12601,0.13815,0.1  
3945,0.13919,0.1234,0.43668,0.43369,0.42852,0.43187,0.44009,0.43487,0.  
43867,0.30207,0.30831,0.33889,0.31267,0.28886,0.32728,0.31868,0.32598,  
0.29899,0.35501,0.32426,0.31727,0.1917,0.19054,0.1898,0.14632,0.13319,  
0.14478,0.13779,0.13787,0.13334,0.132,0.13782,0.14421,0.13901,0.129,0.  
13081,0.14274,0.13759,0.13807,0.43091,0.44041,0.43791,0.43173,0.43204,

0.42471,0.4424,0.44371,0.44356,0.31634,0.32298,0.31451,0.33356,0.31405  
,0.31354,0.3104,0.31052,0.32647,0.34764,0.31099,0.13745,0.13515,0.1409  
4,0.13149,0.13787,0.1378,0.13991,0.13969,0.13229,0.1166,0.14267,0.1273  
3,0.13993,0.13838,0.1383,0.14241,0.14192,0.13671,0.43742,0.4407,0.4312  
9,0.43437,0.44437,0.43502,0.44169,0.42495,0.42586,0.31145,0.27104,0.24  
221,0.21842,0.23731,0.22519,0.2366,0.24017,0.23575,0.24672,0.23963,0.1  
4762,0.13927,0.13899,0.13754,0.12732,0.13875,0.13315,0.13593,0.14823,0  
.13785,0.13048,0.13824,0.12595,0.14168,0.14353,0.1381,0.13826,0.12716,  
0.43283,0.42919,0.43286,0.43294,0.4332,0.43389,0.42843,0.42601,0.44285  
,0.2662,0.24152,0.23806,0.24702,0.23937,0.23794,0.22959,0.21885,0.2335  
8,0.24381,0.24582,0.13957,0.14704,0.14093,0.13809,0.13228,0.13796,0.14  
299,0.13942,0.13938,0.13623,0.14354,0.12184,0.13753,0.14354,0.14658,0.  
14486,0.14962,0.13324,0.43257,0.43961,0.43134,0.45166,0.4389,0.43447,0.  
.42862,0.25965,0.2438,0.21815,0.23682,0.22434,0.23553,0.25426,0.24759,  
0.25401,0.26094,0.24008,0.2384,0.23864,0.14384,0.15298,0.12824,0.13702  
,0.14157,0.13795,0.13132,0.14056,0.14007,0.12483,0.1405,0.12875,0.1307  
6,0.12452,0.13756,0.13851,0.15577,0.13756,0.44701,0.4372,0.4274,0.4384  
5,0.4373,0.42753,0.2658,0.20954,0.27841,0.32958,0.25779,0.22183,0.2245  
7,0.26224,0.22749,0.23834,0.2656,0.24296,0.24151,0.24399,0.13985,0.146  
18,0.12836,0.13749,0.13056,0.13464,0.13374,0.14174,0.13816,0.13894,0.1  
3674,0.13763,0.13228,0.13643,0.13842,0.14112,0.13814,0.13825,0.43355,0  
.43831,0.43656,0.435,0.43518,0.25752,0.24648,0.25973,0.26883,0.25943,0  
.25853,0.23616,0.24129,0.23562,0.23673,0.23006,0.25197,0.24998,0.22496  
,0.24191,0.12864,0.12494,0.13457,0.13747,0.14053,0.14691,0.14208,0.138  
81,0.14084,0.14029,0.14512,0.14434,0.13831,0.13869,0.13647,0.1527,0.13  
779,0.13816,0.43508,0.43615,0.42796,0.22973,0.27663,0.26664,0.23786,0.  
27241,0.26168,0.2588,0.25554,0.24006,0.22287,0.23565,0.23514,0.20741,0  
.23526,0.21959,0.22203,0.23617,0.13282,0.13757,0.13775,0.14502,0.13751  
,0.14399,0.12919,0.13199,0.13864,0.13814,0.14621,0.13793,0.12955,0.126  
98,0.14151,0.12798,0.14113,0.13779,0.43419,0.26002,0.25688,0.29846,0.3  
0029,0.25494,0.25148,0.27694,0.26277,0.26279,0.25353,0.26188,0.24745,0  
.2372,0.2421,0.23025,0.24038,0.24306,0.23524,0.14032,0.14516,0.15386,0  
.13885,0.13988,0.14195,0.11736,0.13912,0.13771,0.13797,0.13769,0.13773  
,0.15286,0.14528,0.15208,0.13762,0.14184,0.085079,0.26605,0.2578,0.279  
6,0.26412,0.23666,0.24304,0.25964,0.24176,0.25127,0.28974,0.2347,0.238  
99,0.24814,0.25942,0.2352,0.23036,0.24528,0.24356,0.23134,0.14474,0.13  
413,0.1406,0.13595,0.13821,0.13795,0.14401,0.14245,0.10765,0.13832,0.1  
3849,0.14187,0.13882,0.14098,0.12124,0.12614,0.13905,0.085792,0.29114,  
0.29974,0.25795,0.23239,0.22888,0.25545,0.26002,0.2588,0.26609,0.25628  
,0.23205,0.23794,0.23004,0.2305,0.22994,0.23977,0.21683,0.22742,0.1377  
7,0.12256,0.13842,0.14114,0.13793,0.12889,0.1376,0.13514,0.13412,0.136  
3,0.13747,0.13778,0.13843,0.14149,0.1296,0.1389,0.14216,0.13305,0.0847  
31,0.23074,0.27405,0.29062,0.25796,0.26163,0.26576,0.26792,0.26204,0.2  
4007,0.25746,0.22872,0.24067,0.24152,0.23707,0.23783,0.24143,0.24022,0  
.24184,0.13369,0.13936,0.13753,0.12999,0.1598,0.13724,0.13764,0.13755,  
0.13724,0.1449,0.13642,0.14167,0.14582,0.1286,0.13924,0.13833,0.13725,  
0.085502,0.085358,0.08475,0.19763,0.26059,0.23884,0.26398,0.22984,0.26  
195,0.25599,0.27577,0.27741,0.24771,0.21822,0.22621,0.22487,0.23217,0.  
23863,0.13488,0.14678,0.14044,0.13742,0.13836,0.14955,0.12948,0.13344,  
0.13781,0.13766,0.15497,0.14128,0.13034,0.13126,0.13828,0.14849,0.1362  
1,0.13847,0.084628,0.085327,0.085579,0.085144,0.26015,0.23644,0.2657,0  
.26221,0.26078,0.2596,0.27364,0.25762,0.26265,0.23801,0.23643,0.22332,

0.13806,0.14055,0.13854,0.12847,0.14252,0.13766,0.13843,0.15612,0.1382  
6,0.13791,0.13463,0.17529,0.12693,0.14132,0.13793,0.13878,0.13534,0.13  
8,0.1193,0.13795,0.084801,0.084643,0.085464,0.085567,0.085079,0.08512,  
0.23654,0.21504,0.27594,0.26023,0.24991,0.26344,0.28857,0.26245,0.1298  
,0.13052,0.14006,0.14797,0.13425,0.13909,0.13845,0.13331,0.1465,0.1371  
1,0.1305,0.14771,0.13793,0.14166,0.14133,0.13816,0.13636,0.13782,0.133  
99,0.14424,0.13846,0.13663,0.14446,0.085,0.085004,0.085519,0.084933,0.  
085089,0.085125,0.30808,0.26038,0.25773,0.28837,0.27637,0.084955,0.085  
045,0.13889,0.13705,0.14505,0.13502,0.13765,0.12765,0.13006,0.13333,0.  
13951,0.13473,0.12901,0.13392,0.14319,0.14031,0.13811,0.14244,0.14148,  
0.14556,0.12436,0.13484,0.13791,0.084728,0.084964,0.085121,0.08487,0.0  
84861,0.085665,0.085433,0.085183,0.085051,0.08516,0.26327,0.26381,0.08  
5408,0.085179,0.085373,0.085043,0.13699,0.14008,0.13625,0.13426,0.1224  
4,0.14836,0.14202,0.13764,0.13824,0.1378,0.13765,0.13717,0.1248,0.1332  
8,0.14258,0.13801,0.13797,0.14842,0.13453,0.085333,0.085568,0.084673,0  
.085505,0.084537,0.085253,0.085324,0.085072,0.085188,0.085122,0.084996  
,0.08532,0.085212,0.085195,0.085232,0.085307,0.08583,0.13831,0.13582,0  
.15412,0.14763,0.13681,0.13818,0.13271,0.15141,0.14996,0.13337,0.14344  
,0.13879,0.13784,0.13769,0.13795,0.13789,0.085284,0.084802,0.084934,0.  
085419,0.085215,0.084672,0.084887,0.085429,0.085638,0.084957,0.085104,  
0.084916,0.085228,0.085553,0.085312,0.085023,0.085431,0.085434,0.08523  
7,0.1253,0.13784,0.11878,0.13945,0.138,0.13853,0.13696,0.12887,0.13836  
,0.13776,0.14282,0.13769,0.13154,0.085007,0.085509,0.084742,0.085323,0  
.084814,0.085636,0.085525,0.085361,0.085034,0.08499,0.085151,0.085145,  
0.084981,0.085334,0.085541,0.085214,0.08532,0.085473,0.085075,0.085317  
,0.085363,0.13834,0.13791,0.13833,0.14171,0.13321,0.14727,0.13842,0.14  
458,0.14517,0.085341,0.085821,0.085395,0.084799,0.085075,0.085572,0.08  
4666,0.085237,0.085026,0.085908,0.085234,0.08452,0.085396,0.085403,0.0  
84804,0.084963,0.084886,0.084698,0.085378,0.085578,0.085347,0.084998,0  
.08555,0.085452,0.085774,0.14537,0.14242,0.13275,0.13244,0.084714,0.08  
5018,0.085443,0.085075,0.085553,0.085162,0.084877,0.085661,0.085013,0.  
085507,0.085199,0.085172,0.085184,0.085161,0.08485,0.085605,0.085132,0  
.085379,0.084458,0.085286,0.085755,0.084886,0.085064,0.085274,0.084828  
,0.085531,0.085251,0.085028,0.085539,0.085435,0.08507,0.085018,0.08503  
3,0.08496,0.085192,0.085377,0.085223,0.085048,0.08519,0.084791,0.08476  
,0.084679,0.085127,0.085227,0.084982,0.085353,0.085003,0.08514,0.08530  
8,0.085,0.085198,0.085138,0.085241,0.084727,0.085151,0.085318,0.085116  
,0.084961,0.084857,0.084903,0.084826,0.08549,0.084648,0.084909,0.08480  
7,0.085188,0.08504,0.08484,0.084857,0.085632,0.085201,0.08493,0.085094  
,0.085356,0.085436,0.085176,0.085043,0.085155,0.084967,0.084832,0.0851  
96,0.085442,0.085643,0.08494,0.085281,0.085094,0.085511,0.084836,0.085  
221,0.08517,0.085148,0.085323,0.085106,0.085774,0.085164,0.084693,0.08  
555,0.085178,0.085297,0.084773,0.085447,0.085157,0.085495,0.085482,0.0  
85606,0.084749,0.084911,0.08461,0.085026,0.085395,0.085143,0.084975,0.  
085333,0.085366,0.084917,0.08591,0.085369,0.085393,0.08475,0.084786,0.  
085148,0.085746,0.084826,0.085029,0.084827,0.085078,0.085004,0.084915,  
0.085852,0.08537,0.08507,0.085774,0.085486,0.085532,0.085292,0.085501,  
0.084984,0.084659,0.084627,0.08499,0.085578,0.085435,0.085572,0.08498,  
0.084923,0.085147,0.085131,0.085309,0.085084,0.085152,0.085479,0.08583  
7,0.085423,0.085323,0.085139,0.085417,0.085443,0.085135,0.084903,0.085  
212,0.084673,0.085632,0.085707,0.084913,0.08551,0.085137,0.085627,0.08  
5065,0.085144,0.085153,0.084992,0.085389,0.085236,0.085668,0.085068,0.

084638,0.085534,0.08556,0.085564,0.085037,0.085135,0.085247,0.085069,0.084913,0.084991,0.085416,0.085316,0.085136,0.085059,0.085407,0.085707,0.08509,0.0853,0.085085,0.084752  
0.19345,0.1944,0.19318,0.19313,0.19349,0.19448,0.19311,0.19382,0.19324,0.19396,0.19349,0.194,0.19359,0.19357,0.19305,0.19428,0.19353,0.19458,0.19393,0.19281,0.28964,0.32278,0.303,0.29569,0.19402,0.19323,0.19315,0.19325,0.19382,0.19373,0.19346,0.19426,0.19305,0.1939,0.19363,0.19376,0.1934,0.19375,0.1936,0.40582,0.30283,0.32428,0.30114,0.29646,0.3074,0.30197,0.19423,0.19396,0.19265,0.194,0.19578,0.19268,0.19388,0.1929,0.19365,0.19285,0.19308,0.19402,0.19362,0.19331,0.19308,0.41099,0.41076,0.29336,0.26483,0.3065,0.27177,0.29714,0.30112,0.30179,0.30135,0.19413,0.1946,0.19402,0.19418,0.19441,0.19297,0.19408,0.19368,0.19348,0.19298,0.19503,0.19332,0.1944,0.19378,0.19319,0.40144,0.41305,0.41665,0.29834,0.32247,0.29105,0.29866,0.30155,0.3045,0.30775,0.30656,0.30395,0.19381,0.19408,0.19454,0.19312,0.19389,0.1943,0.19354,0.19397,0.19291,0.19355,0.19429,0.1937,0.19356,0.19475,0.19389,0.19323,0.41634,0.4132,0.40743,0.41163,0.31446,0.30895,0.29611,0.31253,0.29653,0.2793,0.31263,0.30526,0.27824,0.28612,0.19435,0.1927,0.1937,0.1937,0.19403,0.19346,0.1934,0.19327,0.19372,0.19461,0.19298,0.19346,0.19359,0.19331,0.19292,0.19298,0.40857,0.4135,0.4143,0.40137,0.40917,0.40313,0.30209,0.30987,0.29391,0.31118,0.29786,0.31812,0.32721,0.31327,0.34828,0.29884,0.19292,0.19379,0.19374,0.19372,0.19359,0.19382,0.19347,0.19502,0.19349,0.19381,0.19373,0.19383,0.1932,0.1937,0.19355,0.19354,0.1935,0.39639,0.40933,0.39608,0.40873,0.4065,0.40515,0.3032,0.31262,0.30366,0.29858,0.3019,0.30589,0.29956,0.31577,0.32539,0.32128,0.3109,0.19519,0.1928,0.19352,0.19274,0.19402,0.19399,0.19463,0.19304,0.19361,0.19453,0.1941,0.19412,0.19394,0.13415,0.14181,0.13867,0.19397,0.40618,0.40263,0.41296,0.41232,0.41474,0.42134,0.41172,0.30064,0.29558,0.31661,0.3061,0.28286,0.28218,0.30544,0.28744,0.28242,0.28221,0.31919,0.19319,0.19283,0.19415,0.19307,0.19211,0.19348,0.19456,0.19299,0.19413,0.19422,0.19333,0.13717,0.11762,0.13306,0.13659,0.136,0.12658,0.19309,0.41249,0.42469,0.41141,0.41376,0.41022,0.40644,0.41024,0.32221,0.30365,0.30419,0.30931,0.28309,0.33195,0.3118,0.30283,0.30545,0.29953,0.32582,0.19443,0.19374,0.19411,0.19413,0.19367,0.19283,0.19202,0.19328,0.19315,0.13584,0.13613,0.13901,0.13624,0.13607,0.1359,0.1374,0.1346,0.1416,0.19398,0.40539,0.40944,0.3984,0.4046,0.41171,0.4068,0.41062,0.31402,0.30012,0.30323,0.30018,0.32267,0.33393,0.2994,0.318,0.30138,0.31977,0.30243,0.27226,0.19472,0.19427,0.19346,0.19452,0.19444,0.19349,0.13598,0.13438,0.13488,0.13554,0.14247,0.14544,0.13571,0.12308,0.13655,0.13774,0.13756,0.1202,0.4163,0.40758,0.40695,0.40499,0.41346,0.40866,0.40909,0.29213,0.29817,0.32337,0.30157,0.27877,0.31278,0.30424,0.31509,0.28973,0.33878,0.30978,0.30486,0.19458,0.19333,0.19305,0.14541,0.13075,0.14349,0.1359,0.13605,0.1313,0.12995,0.13594,0.14288,0.13739,0.12636,0.12839,0.14149,0.13569,0.1363,0.40442,0.41464,0.40937,0.40104,0.40706,0.39554,0.41612,0.41507,0.41577,0.304,0.31055,0.30311,0.32111,0.30236,0.30274,0.29945,0.2993,0.31497,0.33202,0.29847,0.13538,0.13305,0.13934,0.12923,0.13609,0.13604,0.13851,0.13808,0.13012,0.1128,0.14149,0.12466,0.13831,0.13656,0.13649,0.14106,0.14053,0.13451,0.41282,0.41721,0.40841,0.40274,0.41899,0.40768,0.41615,0.39671,0.40289,0.29865,0.26455,0.2328,0.20808,0.22636,0.2169,0.22673,0.22986,0.22555,0.2341,0.23167,0.14684,0.13774,0.13722,0.13565,0.12471,0.13703,0.13113,0.13387,0.14734,0.13604,0.1282,0.13642,0.12331,0.14034,0.14232,0.13608,0.13657,0.12424,0.40859,0.40374,0.40

405,0.40354,0.40726,0.40874,0.40071,0.39916,0.41559,0.24821,0.2317,0.2  
2706,0.2382,0.23046,0.22713,0.22003,0.21006,0.22332,0.23575,0.23537,0.  
13804,0.14587,0.1394,0.13624,0.12991,0.13607,0.14146,0.13772,0.13777,0  
.13441,0.14258,0.11889,0.13578,0.14225,0.14565,0.14351,0.1487,0.131,0.  
41245,0.41333,0.40773,0.42642,0.41071,0.41156,0.40044,0.2426,0.22806,0  
.20543,0.22664,0.21563,0.2254,0.24453,0.23495,0.24486,0.24996,0.23006,  
0.2288,0.22893,0.14253,0.15269,0.12575,0.13524,0.14012,0.13601,0.12899  
,0.1389,0.13837,0.12177,0.13924,0.12626,0.12826,0.12153,0.13541,0.1369  
1,0.15526,0.13556,0.42014,0.41206,0.40279,0.41627,0.41201,0.39785,0.24  
987,0.19594,0.26047,0.31323,0.24387,0.21355,0.21655,0.25136,0.21981,0.  
22818,0.25629,0.2312,0.23222,0.23152,0.13814,0.14494,0.12586,0.13556,0  
.12818,0.13267,0.13163,0.14037,0.1362,0.13734,0.13474,0.13569,0.12979,  
0.13457,0.13673,0.13942,0.13637,0.13654,0.40674,0.41112,0.41131,0.4068  
,0.40674,0.24063,0.23139,0.24314,0.25456,0.24333,0.2428,0.22867,0.2319  
7,0.22645,0.22672,0.22059,0.24189,0.2391,0.21724,0.23227,0.12612,0.122  
19,0.13259,0.13567,0.13895,0.14606,0.14056,0.13702,0.1393,0.13875,0.14  
424,0.14279,0.13659,0.13677,0.13504,0.15209,0.13619,0.13631,0.41105,0.  
41199,0.40277,0.21494,0.25828,0.24907,0.22287,0.25525,0.24549,0.24142,  
0.24011,0.23068,0.21373,0.22551,0.22564,0.19953,0.22592,0.21102,0.2132  
8,0.22502,0.13058,0.13552,0.13581,0.14362,0.13543,0.14292,0.12682,0.12  
989,0.13662,0.13639,0.14529,0.13615,0.12686,0.12396,0.13997,0.1255,0.1  
3939,0.13597,0.41099,0.244,0.23962,0.28068,0.28263,0.24012,0.23578,0.2  
6121,0.24546,0.24727,0.2433,0.24963,0.23781,0.22785,0.23178,0.22061,0.  
22951,0.23097,0.22427,0.13906,0.14409,0.15397,0.13705,0.13829,0.1405,0  
.11379,0.13735,0.13582,0.13606,0.13601,0.13601,0.15225,0.14405,0.15157  
,0.13579,0.14081,0.078524,0.25121,0.24363,0.26196,0.24676,0.22287,0.22  
813,0.24312,0.22522,0.23318,0.27422,0.22507,0.22935,0.23739,0.25007,0.  
22723,0.22122,0.23295,0.23147,0.22139,0.14357,0.13169,0.13897,0.13358,  
0.13654,0.13619,0.14263,0.14104,0.10292,0.13661,0.13697,0.14053,0.1371  
2,0.13925,0.11807,0.12329,0.13736,0.079182,0.27274,0.27936,0.24369,0.2  
1917,0.21664,0.23907,0.24549,0.24238,0.24915,0.24038,0.22306,0.22885,0  
.22124,0.22108,0.21994,0.23074,0.20794,0.21832,0.13597,0.11928,0.13678  
,0.13986,0.13618,0.12646,0.13564,0.13327,0.13211,0.13442,0.13592,0.136  
09,0.13661,0.14015,0.12712,0.13709,0.14088,0.13078,0.078213,0.21726,0.  
25878,0.27301,0.24316,0.24476,0.24704,0.2514,0.24631,0.22609,0.2419,0.  
21763,0.22899,0.23136,0.22878,0.22958,0.23064,0.22877,0.23198,0.13144,  
0.13772,0.13573,0.12727,0.15999,0.13535,0.13599,0.13579,0.13537,0.1436  
5,0.13442,0.14027,0.14473,0.12581,0.13765,0.13652,0.1354,0.079009,0.07  
8588,0.078114,0.18441,0.24439,0.22192,0.24947,0.21574,0.24632,0.2387,0  
.26096,0.26105,0.23627,0.21061,0.2168,0.21549,0.22299,0.22815,0.13292,  
0.14543,0.13892,0.13549,0.13646,0.14871,0.12715,0.1312,0.13629,0.13613  
,0.15478,0.13989,0.12788,0.12867,0.13656,0.14757,0.13432,0.1365,0.0780  
47,0.078501,0.078946,0.078601,0.24428,0.2204,0.24729,0.24617,0.24599,0  
.24431,0.25836,0.24321,0.24804,0.22806,0.22757,0.21511,0.13645,0.13907  
,0.13688,0.12561,0.14108,0.13566,0.13672,0.15637,0.13668,0.13614,0.132  
63,0.17694,0.12405,0.13988,0.1363,0.13725,0.13327,0.13624,0.11607,0.13  
611,0.078461,0.078288,0.078872,0.079117,0.078468,0.07857,0.22142,0.200  
51,0.25792,0.24355,0.23671,0.24741,0.27288,0.24639,0.12699,0.12796,0.1  
3845,0.14732,0.13201,0.13756,0.13695,0.13129,0.1456,0.1353,0.12818,0.1  
47,0.1361,0.1402,0.14003,0.13603,0.13445,0.13589,0.13192,0.14301,0.136  
72,0.13479,0.1431,0.078404,0.078489,0.078802,0.07841,0.078677,0.078752  
,0.28943,0.24466,0.24235,0.27054,0.26089,0.078415,0.078555,0.13715,0.1

3492,0.14393,0.13282,0.13603,0.12487,0.12745,0.13107,0.13802,0.13254,0.12647,0.13185,0.1418,0.13861,0.1364,0.14109,0.14,0.1445,0.1215,0.13272,0.13624,0.078162,0.078362,0.078647,0.078288,0.07849,0.079123,0.078774,0.078666,0.07855,0.078567,0.24808,0.2479,0.078626,0.07851,0.078793,0.078409,0.13519,0.13842,0.13411,0.13225,0.1191,0.14733,0.14058,0.13598,0.13632,0.13612,0.13583,0.13534,0.12206,0.13093,0.14133,0.13601,0.13603,0.1473,0.13249,0.078647,0.07877,0.078007,0.078871,0.078044,0.078703,0.078765,0.078706,0.078546,0.078648,0.078197,0.078682,0.078587,0.078511,0.07862,0.078691,0.079031,0.13628,0.13375,0.15392,0.14659,0.13479,0.13628,0.13037,0.15045,0.14933,0.13125,0.14194,0.13685,0.13616,0.13591,0.13622,0.13607,0.078618,0.078345,0.07836,0.078717,0.07864,0.077914,0.078292,0.078614,0.078974,0.078405,0.078468,0.078283,0.078584,0.079083,0.078803,0.078521,0.07852,0.078916,0.078658,0.12208,0.13586,0.11552,0.13762,0.13605,0.13656,0.13493,0.12627,0.13645,0.13589,0.14122,0.13607,0.12907,0.078329,0.078816,0.078293,0.078836,0.078587,0.078808,0.078798,0.0787,0.078425,0.078755,0.078672,0.078638,0.078246,0.078695,0.079073,0.078668,0.078587,0.078843,0.07854,0.078593,0.078777,0.13673,0.13603,0.13655,0.1403,0.13082,0.14609,0.13699,0.14333,0.14404,0.078698,0.079133,0.078899,0.078477,0.07835,0.079076,0.078132,0.078673,0.078703,0.079175,0.078692,0.077721,0.079054,0.078972,0.078486,0.078552,0.078364,0.078106,0.078763,0.078847,0.078659,0.078435,0.079104,0.078543,0.079174,0.14439,0.14071,0.13032,0.13018,0.078001,0.078448,0.079046,0.078585,0.078642,0.078559,0.07839,0.079031,0.078326,0.078911,0.078558,0.078654,0.078683,0.078756,0.078308,0.078991,0.078669,0.078825,0.077862,0.078584,0.079038,0.0783,0.078481,0.078714,0.078454,0.078921,0.078726,0.078569,0.078936,0.078784,0.078562,0.078485,0.078439,0.078573,0.078768,0.078884,0.07859,0.078514,0.078622,0.078056,0.078133,0.078321,0.078656,0.078685,0.078426,0.078894,0.078383,0.078607,0.078723,0.078314,0.078583,0.078726,0.07882,0.078366,0.078638,0.078678,0.078433,0.07827,0.078383,0.078715,0.078397,0.078904,0.07814,0.078356,0.07824,0.078565,0.078639,0.078318,0.078476,0.078865,0.07874,0.078521,0.0784,0.078705,0.078825,0.078636,0.078499,0.078444,0.078502,0.078371,0.078573,0.078797,0.079231,0.078502,0.078824,0.07852,0.0791,0.078453,0.078635,0.078513,0.078749,0.078636,0.078677,0.079159,0.078481,0.078176,0.07899,0.078611,0.078732,0.078437,0.078813,0.078607,0.078704,0.078892,0.079173,0.078034,0.078343,0.077792,0.07851,0.078878,0.07862,0.078409,0.078903,0.078831,0.078437,0.079496,0.079019,0.078863,0.078249,0.078251,0.078607,0.079192,0.078294,0.078465,0.078324,0.078262,0.078525,0.078517,0.07924,0.078533,0.0784,0.079226,0.079302,0.078925,0.078735,0.078971,0.078733,0.078008,0.0781,0.078602,0.079091,0.078703,0.078985,0.078727,0.078302,0.078622,0.078513,0.078721,0.078621,0.078788,0.079023,0.079044,0.078791,0.078745,0.07886,0.078739,0.078734,0.078743,0.078194,0.078602,0.078143,0.079108,0.079157,0.078265,0.078867,0.078689,0.079208,0.078532,0.07855,0.078724,0.078417,0.078623,0.078536,0.078977,0.078414,0.078299,0.079096,0.078987,0.078942,0.078393,0.078689,0.078795,0.078308,0.078744,0.078428,0.078843,0.078717,0.078588,0.078266,0.078868,0.079018,0.078677,0.078699,0.078445,0.078007

0.19572,0.19699,0.19563,0.19535,0.19641,0.19642,0.19543,0.19589,0.19564,0.19603,0.19585,0.19659,0.19593,0.19581,0.19606,0.1963,0.19636,0.19701,0.19665,0.19539,0.28441,0.31425,0.296,0.28915,0.19671,0.19561,0.19571,0.19654,0.19572,0.19599,0.19565,0.19696,0.1952,0.19598,0.19618,0.19628,0.19553,0.19569,0.19603,0.39207,0.29613,0.31495,0.29376,0.28907,0.



30238,0.29547,0.1965,0.19638,0.19515,0.19644,0.19775,0.19494,0.19621,0.19566,0.19672,0.19535,0.19577,0.19667,0.19598,0.19555,0.19562,0.3972,0.39762,0.28752,0.26178,0.29918,0.26744,0.29149,0.2944,0.29334,0.29403,0.19661,0.19673,0.19626,0.19653,0.19666,0.1954,0.19662,0.19573,0.19557,0.19504,0.19738,0.19579,0.19698,0.19574,0.19605,0.38626,0.39778,0.40005,0.29061,0.31298,0.28325,0.29092,0.29333,0.29642,0.30027,0.30164,0.29859,0.19601,0.19663,0.19674,0.19529,0.19615,0.1969,0.19577,0.19617,0.19518,0.19552,0.19641,0.19586,0.19619,0.1968,0.19651,0.1955,0.39957,0.39701,0.38817,0.39458,0.30673,0.30159,0.28967,0.30547,0.28843,0.27403,0.30447,0.29771,0.27393,0.28084,0.19694,0.19539,0.1962,0.19624,0.19624,0.1952,0.1958,0.19583,0.19588,0.19729,0.19514,0.19586,0.19596,0.19616,0.19548,0.19574,0.39175,0.39537,0.3988,0.38678,0.38607,0.38907,0.29515,0.30154,0.28693,0.30279,0.29051,0.31077,0.31729,0.30527,0.3358,0.29337,0.1952,0.19629,0.19635,0.19595,0.19597,0.19605,0.19569,0.19736,0.19578,0.19612,0.19636,0.196,0.19569,0.19613,0.19598,0.19601,0.1961,0.37645,0.39064,0.37663,0.38891,0.3889,0.38993,0.29947,0.30377,0.29613,0.29198,0.29384,0.29864,0.29214,0.30604,0.31739,0.31097,0.30078,0.19709,0.19541,0.19601,0.19557,0.19675,0.19621,0.1968,0.19554,0.19584,0.19653,0.19626,0.19668,0.19634,0.13256,0.14067,0.13714,0.19644,0.39024,0.38368,0.39649,0.39455,0.40028,0.40628,0.39671,0.2925,0.29113,0.30701,0.29975,0.27778,0.27692,0.29615,0.2818,0.27683,0.27607,0.31259,0.19533,0.19488,0.19662,0.19561,0.19429,0.19607,0.19715,0.19548,0.19633,0.19624,0.19552,0.13573,0.11474,0.13143,0.13478,0.13433,0.12398,0.19525,0.39355,0.40968,0.39441,0.40229,0.39163,0.38844,0.39571,0.31498,0.2978,0.29594,0.30348,0.27837,0.32105,0.30562,0.29388,0.29785,0.29391,0.31533,0.19665,0.19625,0.19635,0.19693,0.19615,0.19564,0.19447,0.196,0.19577,0.13415,0.13488,0.1375,0.1347,0.13444,0.13404,0.13596,0.13265,0.14008,0.19621,0.38785,0.39125,0.38511,0.38929,0.38971,0.39102,0.39273,0.30511,0.29426,0.29764,0.29346,0.31234,0.32227,0.29357,0.30937,0.29419,0.30965,0.29552,0.26746,0.19704,0.19627,0.19563,0.1965,0.19729,0.19561,0.13447,0.13269,0.1332,0.13405,0.14134,0.14442,0.13382,0.12066,0.13501,0.13605,0.13595,0.1174,0.39843,0.39369,0.39049,0.39023,0.40026,0.39422,0.39703,0.28644,0.29149,0.31515,0.29364,0.27409,0.30516,0.29584,0.30568,0.28391,0.33108,0.30362,0.29809,0.19726,0.19583,0.1956,0.14447,0.12871,0.14257,0.13406,0.13442,0.12963,0.12805,0.13433,0.14178,0.13566,0.12408,0.12634,0.14033,0.1339,0.13455,0.38651,0.39474,0.39645,0.38729,0.3906,0.3798,0.39794,0.39825,0.39727,0.29693,0.30169,0.29748,0.31442,0.29526,0.29653,0.29179,0.29365,0.30702,0.32366,0.29308,0.13361,0.13135,0.13789,0.12701,0.13445,0.13458,0.13723,0.13668,0.12758,0.10951,0.13986,0.12219,0.13663,0.13511,0.1347,0.13972,0.13917,0.13265,0.39776,0.39606,0.38958,0.38297,0.40166,0.39084,0.40068,0.38086,0.38807,0.29147,0.26124,0.22641,0.20022,0.22026,0.21114,0.22192,0.22244,0.21943,0.22651,0.22643,0.14569,0.13624,0.1354,0.13421,0.12216,0.13528,0.12906,0.13226,0.14658,0.13449,0.12637,0.13465,0.12093,0.13885,0.14121,0.13442,0.13468,0.1218,0.39081,0.38644,0.39053,0.38267,0.39194,0.39421,0.3836,0.38679,0.39975,0.23751,0.22499,0.21964,0.23165,0.22358,0.22,0.21511,0.20385,0.21674,0.22959,0.22811,0.13637,0.14504,0.1379,0.13448,0.12783,0.13435,0.14024,0.13631,0.13634,0.13273,0.14117,0.11612,0.13421,0.14085,0.14476,0.1425,0.14787,0.12924,0.39243,0.39629,0.3891,0.40883,0.39403,0.39534,0.38657,0.22934,0.2172,0.19613,0.22001,0.20923,0.21938,0.23739,0.22697,0.23691,0.24207,0.22207,0.22351,0.22149,0.14142,0.15202,0.12324,0.13347,0.1386,0.1344,0.12678,0.13724,0.13678,0.11916,0.13771,0.12413,0.12615

,0.11909,0.13364,0.13523,0.15523,0.1341,0.4066,0.39818,0.38622,0.40072  
,0.39345,0.38228,0.23645,0.18574,0.24659,0.30028,0.23299,0.20825,0.210  
55,0.2443,0.21518,0.2207,0.24912,0.22404,0.22572,0.22473,0.13677,0.143  
99,0.1234,0.13394,0.12625,0.1309,0.12947,0.13884,0.13491,0.13555,0.133  
06,0.13435,0.12764,0.13296,0.13521,0.13795,0.13474,0.13493,0.38816,0.3  
8974,0.39218,0.39023,0.39084,0.23016,0.22162,0.23478,0.24431,0.23207,0  
.23237,0.22305,0.22407,0.21945,0.2205,0.21546,0.23402,0.23252,0.21252,  
0.22609,0.12368,0.11968,0.13084,0.13423,0.13742,0.14524,0.13935,0.1354  
7,0.13804,0.13733,0.14301,0.14188,0.13502,0.13523,0.13339,0.15149,0.13  
465,0.1347,0.39193,0.39567,0.38578,0.20529,0.24637,0.2378,0.21153,0.24  
379,0.23426,0.23268,0.23174,0.22283,0.20806,0.21968,0.21928,0.19504,0.  
22023,0.20498,0.20823,0.21927,0.12865,0.13403,0.13425,0.14258,0.13363,  
0.14189,0.1246,0.12787,0.13505,0.13469,0.1445,0.13471,0.12439,0.12169,  
0.1387,0.12308,0.13803,0.13386,0.39632,0.23318,0.22764,0.26806,0.27056  
,0.22846,0.22735,0.25101,0.23253,0.23525,0.23605,0.24118,0.2307,0.2217  
3,0.2259,0.21349,0.22376,0.22431,0.21691,0.13774,0.14306,0.15343,0.135  
87,0.13715,0.1389,0.11048,0.13574,0.13438,0.13458,0.13465,0.13473,0.15  
193,0.14291,0.15124,0.13437,0.13964,0.072849,0.24098,0.23214,0.25062,0  
.2366,0.21125,0.21803,0.23399,0.21424,0.22199,0.26381,0.21792,0.22193,  
0.23097,0.24112,0.22028,0.21609,0.22614,0.22326,0.21505,0.14205,0.1295  
2,0.13793,0.13156,0.13482,0.1345,0.14111,0.13969,0.099058,0.13528,0.13  
549,0.1392,0.13547,0.13797,0.11504,0.12066,0.13574,0.073272,0.26094,0.  
26576,0.23288,0.2075,0.20768,0.22738,0.23454,0.23074,0.23768,0.22835,0  
.21683,0.22325,0.21432,0.21504,0.2147,0.22435,0.20197,0.21207,0.13443,  
0.11635,0.13504,0.13849,0.1346,0.12441,0.13409,0.13154,0.13024,0.13276  
,0.13436,0.13428,0.13524,0.1388,0.12461,0.13556,0.13962,0.12886,0.0725  
66,0.20677,0.24793,0.26156,0.23199,0.23238,0.23512,0.23763,0.23411,0.2  
1598,0.22983,0.21141,0.22212,0.22525,0.22149,0.22251,0.22313,0.22207,0  
.22452,0.12948,0.13621,0.13403,0.12486,0.16009,0.13371,0.13446,0.13399  
,0.13363,0.14259,0.13246,0.13904,0.14384,0.1235,0.13631,0.13476,0.1339  
6,0.073231,0.073112,0.072637,0.17588,0.23372,0.21272,0.23746,0.20763,0  
.23452,0.22712,0.24923,0.25032,0.23003,0.2054,0.21027,0.20909,0.21682,  
0.22157,0.13077,0.14429,0.13751,0.13392,0.1346,0.14755,0.12487,0.12927  
,0.13443,0.13462,0.15449,0.13845,0.12576,0.12665,0.13466,0.14691,0.132  
81,0.13477,0.072559,0.072691,0.073385,0.072934,0.23402,0.21278,0.23702  
,0.23154,0.23557,0.23489,0.24609,0.23197,0.23431,0.22284,0.2219,0.2094  
5,0.13477,0.13759,0.1354,0.12343,0.13961,0.13417,0.13529,0.15645,0.134  
98,0.13454,0.13051,0.17844,0.12182,0.13849,0.1349,0.13551,0.13155,0.13  
466,0.11317,0.13457,0.072908,0.072669,0.073001,0.073271,0.072961,0.073  
022,0.21199,0.18981,0.24662,0.23105,0.22698,0.23492,0.26163,0.23644,0.  
1248,0.12601,0.13667,0.14621,0.13002,0.13596,0.13523,0.1294,0.1448,0.1  
3359,0.1259,0.14625,0.13447,0.13927,0.13864,0.13457,0.1324,0.13458,0.1  
2998,0.14189,0.13535,0.13295,0.14195,0.072852,0.073097,0.073229,0.0728  
31,0.072995,0.073135,0.27457,0.23411,0.23145,0.26211,0.24628,0.072949,  
0.072932,0.13555,0.13305,0.14272,0.13121,0.13433,0.12267,0.12542,0.129  
16,0.13663,0.13086,0.12427,0.12973,0.14033,0.13692,0.13486,0.13969,0.1  
3859,0.14356,0.11873,0.13086,0.13447,0.072549,0.072646,0.07304,0.07266  
6,0.073137,0.073515,0.073227,0.073251,0.072877,0.072929,0.23782,0.2360  
9,0.073203,0.072757,0.07331,0.072722,0.13372,0.13668,0.13211,0.13036,0  
.11626,0.14643,0.1394,0.13459,0.13468,0.13448,0.13428,0.13395,0.11927,  
0.1291,0.13998,0.13439,0.13439,0.14657,0.13054,0.073174,0.072988,0.072  
789,0.073273,0.07221,0.073158,0.073463,0.073201,0.073089,0.072935,0.07

2699,0.07308,0.073065,0.07271,0.073097,0.07295,0.073453,0.13489,0.1318  
1,0.15341,0.14556,0.13281,0.13442,0.12837,0.14997,0.14885,0.12939,0.14  
086,0.13551,0.1343,0.13437,0.13485,0.13429,0.073123,0.072619,0.072804,  
0.073284,0.073101,0.072464,0.072756,0.073106,0.073525,0.072898,0.07270  
8,0.072698,0.072919,0.073557,0.073411,0.072901,0.0732,0.073338,0.07309  
7,0.11949,0.13424,0.11244,0.13602,0.13463,0.13478,0.13325,0.12399,0.13  
462,0.13426,0.14006,0.13427,0.12694,0.072525,0.073179,0.072806,0.07321  
9,0.072776,0.073212,0.073256,0.0732,0.072969,0.073192,0.073174,0.07310  
9,0.072706,0.073112,0.073534,0.073062,0.072972,0.073162,0.07293,0.0728  
09,0.07311,0.1351,0.13459,0.13523,0.13909,0.12901,0.14533,0.13508,0.14  
227,0.14304,0.073043,0.073449,0.073313,0.072969,0.072772,0.073441,0.07  
2419,0.073033,0.072943,0.07359,0.073047,0.072206,0.073297,0.073485,0.0  
72969,0.072843,0.072759,0.072402,0.073157,0.073099,0.072997,0.072778,0  
.073574,0.073106,0.073436,0.14338,0.13958,0.12854,0.12802,0.07261,0.07  
2912,0.07321,0.072953,0.07314,0.073238,0.073053,0.07327,0.072808,0.073  
053,0.073093,0.072829,0.073261,0.07321,0.072949,0.073445,0.07312,0.073  
322,0.072172,0.073052,0.073532,0.07266,0.072789,0.073081,0.072878,0.07  
319,0.073155,0.072842,0.073039,0.073005,0.072851,0.072888,0.072987,0.0  
73016,0.073294,0.073216,0.073006,0.073033,0.073015,0.072622,0.072806,0  
.072637,0.07295,0.073094,0.072786,0.073214,0.072644,0.072788,0.073174,  
0.072737,0.072799,0.073276,0.073015,0.072657,0.073138,0.073143,0.07285  
2,0.072726,0.072662,0.073033,0.072896,0.073241,0.072438,0.072676,0.072  
768,0.072913,0.073203,0.072803,0.072862,0.073218,0.073348,0.072812,0.0  
72848,0.072998,0.07313,0.072965,0.072955,0.072776,0.073096,0.072953,0.  
072971,0.073356,0.073588,0.072766,0.073098,0.072938,0.073406,0.072823,  
0.073042,0.073224,0.073187,0.072803,0.072996,0.073533,0.072917,0.07253  
2,0.073336,0.073044,0.073218,0.072738,0.073037,0.072956,0.07306,0.0733  
78,0.073444,0.072437,0.073035,0.072166,0.073068,0.073267,0.072842,0.07  
2765,0.073286,0.073214,0.072409,0.07389,0.073456,0.073108,0.072657,0.0  
72498,0.072665,0.073644,0.072826,0.073087,0.072985,0.072874,0.072968,0  
.072833,0.073526,0.072986,0.07288,0.073578,0.073746,0.07317,0.073055,0  
.07325,0.073213,0.072453,0.072601,0.073054,0.073458,0.073144,0.073196,  
0.073109,0.072658,0.073117,0.072954,0.073037,0.073062,0.07323,0.073332  
,0.073431,0.073243,0.073112,0.073056,0.073087,0.072984,0.073149,0.0724  
42,0.073052,0.07253,0.073548,0.073578,0.072799,0.073276,0.072976,0.073  
496,0.073005,0.072502,0.07302,0.072795,0.072897,0.072951,0.073499,0.07  
2919,0.072515,0.073555,0.073301,0.073307,0.072853,0.072867,0.073203,0.  
072655,0.073026,0.072859,0.073342,0.073274,0.072924,0.072388,0.073308,  
0.073261,0.072832,0.073162,0.072771,0.072414  
0.19763,0.19864,0.19745,0.19714,0.19813,0.198,0.19723,0.19758,0.19748,  
0.19812,0.19787,0.19817,0.19776,0.19812,0.19775,0.19811,0.19815,0.1986  
6,0.19842,0.19755,0.28118,0.31052,0.29192,0.28715,0.19867,0.19803,0.19  
814,0.19836,0.19735,0.19799,0.19768,0.19808,0.19732,0.19779,0.1982,0.1  
9821,0.19752,0.19764,0.1981,0.37634,0.29118,0.30873,0.28924,0.28433,0.  
29636,0.29057,0.19806,0.19839,0.1973,0.19838,0.19911,0.19653,0.1982,0.  
19734,0.19881,0.19668,0.19796,0.19879,0.19774,0.19709,0.19754,0.38449,  
0.38309,0.28398,0.25984,0.29382,0.26478,0.28616,0.2907,0.28964,0.2899,  
0.19822,0.19868,0.19833,0.198,0.19913,0.19762,0.1987,0.19758,0.19758,0  
.19714,0.1993,0.19797,0.19917,0.19758,0.19777,0.37817,0.3818,0.3909,0.  
28865,0.30753,0.2795,0.28615,0.29004,0.29134,0.29597,0.29749,0.29428,0  
.19787,0.19866,0.19854,0.19756,0.19787,0.19878,0.19745,0.19858,0.19711  
,0.19791,0.19807,0.19788,0.19794,0.19874,0.19825,0.19739,0.39038,0.386

53,0.38149,0.38489,0.30433,0.29863,0.28655,0.30066,0.28515,0.27106,0.29917,0.29339,0.27035,0.27745,0.19866,0.19729,0.19804,0.19811,0.19833,0.19733,0.19772,0.1973,0.1974,0.19938,0.19735,0.19781,0.19828,0.198,0.1976,0.19836,0.38379,0.38802,0.39371,0.37611,0.3765,0.37899,0.28963,0.29722,0.28143,0.29991,0.28791,0.30491,0.312,0.29796,0.32541,0.28783,0.19719,0.19823,0.19865,0.19761,0.19736,0.19811,0.19776,0.19934,0.198,0.19791,0.19812,0.19772,0.19785,0.19804,0.19804,0.19801,0.19784,0.36492,0.37643,0.36578,0.37893,0.37513,0.37998,0.29337,0.29784,0.29192,0.2869,0.29046,0.29687,0.28636,0.30285,0.31156,0.30544,0.2975,0.19863,0.19752,0.19818,0.19753,0.19865,0.19803,0.19868,0.19754,0.19814,0.1985,0.19847,0.19849,0.19828,0.13098,0.13988,0.13589,0.19823,0.37927,0.37192,0.38857,0.38355,0.3914,0.39184,0.38771,0.28518,0.28757,0.30115,0.29468,0.27528,0.2731,0.29212,0.27743,0.27495,0.27369,0.30411,0.19699,0.19702,0.19825,0.19785,0.19646,0.1978,0.19851,0.19776,0.19848,0.19778,0.19755,0.13436,0.11217,0.13013,0.13354,0.13301,0.12192,0.19736,0.38192,0.39859,0.38061,0.38967,0.38112,0.37779,0.38236,0.30854,0.29313,0.29166,0.29932,0.27453,0.31549,0.30017,0.29011,0.29162,0.28919,0.30709,0.19857,0.19846,0.19826,0.19857,0.19813,0.19748,0.19691,0.19789,0.19727,0.13287,0.13315,0.1362,0.13325,0.13313,0.1326,0.13474,0.13111,0.139,0.1981,0.37935,0.38294,0.37367,0.37703,0.38045,0.37909,0.38178,0.29882,0.28819,0.2951,0.2901,0.30609,0.315,0.29024,0.30415,0.28974,0.30628,0.29006,0.26543,0.19906,0.19791,0.1977,0.19822,0.19903,0.19733,0.13319,0.13105,0.13164,0.1327,0.14052,0.14368,0.13251,0.11882,0.13356,0.13477,0.13467,0.11501,0.38721,0.38382,0.38236,0.37141,0.39083,0.38593,0.38715,0.28273,0.28718,0.30802,0.28604,0.27001,0.29924,0.2927,0.30126,0.27926,0.32379,0.29829,0.29399,0.1992,0.19743,0.19766,0.1438,0.12725,0.14128,0.13269,0.13331,0.12806,0.12618,0.13288,0.14016,0.13451,0.12241,0.12449,0.13937,0.13233,0.13329,0.3722,0.38586,0.39131,0.3744,0.38187,0.37028,0.3846,0.38505,0.3872,0.29252,0.29527,0.29074,0.30825,0.29186,0.29184,0.2871,0.28926,0.30324,0.3177,0.28802,0.13193,0.12999,0.13635,0.12517,0.13314,0.13305,0.13631,0.13539,0.12571,0.1069,0.13864,0.12033,0.13531,0.13373,0.13331,0.13849,0.13796,0.13136,0.38275,0.38751,0.37908,0.37344,0.39093,0.37508,0.3894,0.37548,0.37764,0.28477,0.25852,0.22199,0.1963,0.21471,0.20744,0.21723,0.2181,0.21444,0.22136,0.22306,0.14515,0.13496,0.13412,0.13312,0.12019,0.13393,0.12726,0.13045,0.14619,0.133,0.12444,0.13321,0.11884,0.13787,0.14013,0.13304,0.13329,0.11969,0.37803,0.37471,0.37461,0.36885,0.38288,0.38663,0.37874,0.37744,0.38999,0.23079,0.2213,0.21573,0.22828,0.21828,0.21595,0.21197,0.19996,0.21444,0.22691,0.22281,0.13521,0.1443,0.13681,0.13297,0.12624,0.13292,0.13897,0.13509,0.13514,0.1313,0.14012,0.11369,0.13288,0.13992,0.14403,0.14156,0.14709,0.12725,0.38279,0.38709,0.37987,0.39738,0.38134,0.3796,0.37344,0.22093,0.20988,0.18816,0.21502,0.2059,0.21452,0.23165,0.22018,0.233,0.23554,0.21676,0.21996,0.21626,0.14054,0.15177,0.12119,0.13229,0.13739,0.13321,0.12496,0.13593,0.13549,0.11679,0.13644,0.12207,0.12423,0.11661,0.13223,0.13387,0.15497,0.13268,0.38881,0.38347,0.37637,0.38673,0.38532,0.36536,0.22836,0.17863,0.2379,0.2944,0.22575,0.20516,0.20643,0.2397,0.21244,0.21645,0.24538,0.21697,0.22129,0.22026,0.13565,0.1435,0.12141,0.1324,0.1244,0.12925,0.12748,0.13761,0.13338,0.13426,0.13141,0.13288,0.12566,0.13144,0.13386,0.13681,0.13348,0.13365,0.37904,0.37703,0.38243,0.37612,0.38144,0.22176,0.21308,0.22852,0.2341,0.22462,0.22332,0.21908,0.21955,0.21588,0.21604,0.21054,0.23036,0.22701,0.209,0.2203,0.12165,0.11736,0.12922,0.133,0.13633,0.14475,0.13814,0.13395,0.13696,0.13607,0.

14176,0.14055,0.1335,0.13366,0.13217,0.15119,0.13334,0.13337,0.38117,0.38512,0.37304,0.19795,0.23824,0.23099,0.20585,0.23412,0.22583,0.22406,0.22432,0.21759,0.20487,0.2139,0.21444,0.19103,0.21422,0.20186,0.20411,0.21467,0.1269,0.13276,0.13287,0.14164,0.13205,0.14114,0.12265,0.12627,0.13368,0.13333,0.14357,0.13327,0.12252,0.11948,0.13742,0.12124,0.13685,0.13268,0.38166,0.22419,0.21766,0.2604,0.26355,0.22139,0.22075,0.2425,0.22786,0.2245,0.23112,0.23554,0.2257,0.21704,0.22181,0.20917,0.21785,0.22,0.21252,0.13673,0.14199,0.15283,0.1345,0.13597,0.1378,0.10784,0.13435,0.13298,0.1335,0.13336,0.13325,0.15158,0.14191,0.15052,0.13297,0.13838,0.068089,0.23282,0.22337,0.24367,0.22868,0.20308,0.20963,0.2274,0.20649,0.21323,0.25506,0.21263,0.21735,0.22623,0.23547,0.21551,0.21239,0.22142,0.21827,0.21103,0.14106,0.12792,0.13641,0.12988,0.1335,0.13329,0.14018,0.13851,0.095816,0.13385,0.13409,0.13814,0.13424,0.13667,0.11271,0.11843,0.13432,0.068474,0.25345,0.25757,0.22439,0.20062,0.20047,0.22027,0.22339,0.22457,0.22954,0.22157,0.21314,0.21808,0.21012,0.21058,0.20919,0.21817,0.19767,0.20831,0.13302,0.11402,0.13365,0.13726,0.13326,0.12247,0.13256,0.12988,0.12855,0.13139,0.13279,0.13301,0.1338,0.13735,0.12275,0.13424,0.13857,0.12724,0.06785,0.19896,0.24067,0.25366,0.22207,0.22574,0.22598,0.23311,0.22683,0.2082,0.22277,0.20671,0.21641,0.22047,0.21705,0.21836,0.21832,0.21759,0.21951,0.12793,0.13456,0.13291,0.12306,0.16007,0.13212,0.13307,0.13264,0.13223,0.1418,0.13099,0.13801,0.14308,0.12156,0.13515,0.1334,0.13249,0.068805,0.0684,0.067616,0.17078,0.22561,0.20611,0.22857,0.20167,0.22618,0.21838,0.23967,0.24272,0.22313,0.20239,0.20711,0.20573,0.21296,0.21668,0.12926,0.14345,0.13614,0.13261,0.13332,0.1467,0.12301,0.12774,0.13281,0.1334,0.15444,0.13713,0.12406,0.12485,0.13345,0.14644,0.13128,0.13329,0.068103,0.067967,0.068629,0.068056,0.22622,0.20321,0.22976,0.22502,0.22683,0.22749,0.23677,0.22567,0.22695,0.21897,0.21758,0.20399,0.13322,0.13629,0.13417,0.12172,0.13827,0.13291,0.13368,0.15655,0.13376,0.13315,0.129,0.17919,0.11987,0.1372,0.13341,0.13412,0.13,0.1334,0.11056,0.13318,0.068073,0.068243,0.068184,0.068488,0.068217,0.068221,0.2046,0.18232,0.24053,0.2262,0.21948,0.22945,0.25343,0.22819,0.12262,0.12411,0.13536,0.14541,0.12841,0.13449,0.13387,0.12768,0.14384,0.1321,0.12387,0.14538,0.13327,0.13826,0.13756,0.13315,0.13088,0.13329,0.12843,0.14104,0.13402,0.13144,0.1411,0.068293,0.068493,0.06874,0.068247,0.06832,0.068516,0.26401,0.2259,0.22572,0.25465,0.23701,0.068322,0.068313,0.13421,0.13181,0.14199,0.12957,0.13282,0.12067,0.12362,0.12761,0.13548,0.12928,0.12221,0.12795,0.13955,0.13573,0.13335,0.13887,0.13747,0.14237,0.11671,0.1294,0.13281,0.068008,0.067892,0.068449,0.068034,0.06828,0.068726,0.068553,0.068601,0.068274,0.068294,0.22834,0.22918,0.068732,0.068044,0.068583,0.068258,0.13242,0.1356,0.13083,0.12885,0.11384,0.1454,0.13829,0.13337,0.13315,0.13317,0.13311,0.13254,0.11697,0.12749,0.13889,0.13301,0.13301,0.14579,0.12884,0.068329,0.068322,0.068153,0.068406,0.067458,0.068336,0.068591,0.068584,0.068467,0.068204,0.068119,0.068351,0.068376,0.068064,0.068358,0.068369,0.068545,0.13364,0.13012,0.15309,0.14485,0.13144,0.13315,0.12678,0.14951,0.14807,0.12769,0.13958,0.13418,0.13301,0.13311,0.13349,0.13313,0.068657,0.067972,0.068328,0.068855,0.068338,0.067656,0.067837,0.068409,0.068958,0.068517,0.06798,0.068054,0.068353,0.068607,0.069002,0.06819,0.068488,0.06874,0.068414,0.11723,0.13291,0.10986,0.13469,0.13302,0.13343,0.13186,0.122,0.13325,0.13269,0.13897,0.13284,0.12505,0.068225,0.068686,0.068091,0.068442,0.068318,0.068301,0.068482,0.068451,0.068298,0.068827,0.068831,0.068403,0.068067,0.06855,0.068823

,0.068277,0.068614,0.068313,0.068211,0.068237,0.068475,0.13351,0.1334,  
0.13392,0.13793,0.12747,0.14445,0.13372,0.14108,0.14227,0.068465,0.068  
729,0.068699,0.068305,0.06844,0.068827,0.067611,0.068358,0.068095,0.06  
8703,0.068401,0.067619,0.068873,0.068726,0.068281,0.068115,0.068236,0.  
067842,0.068398,0.06847,0.068213,0.068047,0.068552,0.068527,0.068695,0  
.14263,0.1384,0.12671,0.12636,0.067701,0.068224,0.068476,0.0684,0.0686  
23,0.068647,0.068403,0.068432,0.068227,0.0685,0.068424,0.068153,0.0685  
16,0.068572,0.068137,0.068858,0.068244,0.068456,0.067502,0.068421,0.06  
8829,0.068109,0.068076,0.068359,0.068136,0.068527,0.068499,0.068043,0.  
068453,0.068543,0.068102,0.068048,0.068256,0.068496,0.068544,0.068545,  
0.068469,0.068353,0.068362,0.068117,0.068094,0.068074,0.068202,0.06841  
3,0.067925,0.068597,0.068052,0.067893,0.068464,0.068137,0.068097,0.068  
46,0.068633,0.068077,0.0686,0.068571,0.068119,0.067985,0.068107,0.0681  
53,0.067963,0.068488,0.067816,0.067928,0.068042,0.068377,0.068188,0.06  
827,0.068269,0.068388,0.068841,0.068268,0.068098,0.068472,0.068335,0.0  
68317,0.068052,0.068278,0.068475,0.068494,0.068212,0.068741,0.069024,0  
.068264,0.068481,0.06852,0.068616,0.06811,0.068384,0.068427,0.068577,0  
.068208,0.068189,0.068862,0.068474,0.067984,0.068725,0.068247,0.068444  
,0.068025,0.068248,0.068332,0.068466,0.068635,0.068708,0.067653,0.0685  
5,0.067403,0.068408,0.068712,0.068184,0.06814,0.068494,0.06859,0.06774  
9,0.069026,0.068632,0.068466,0.067926,0.067644,0.068008,0.068962,0.068  
14,0.068205,0.068384,0.068304,0.068425,0.068294,0.068797,0.068149,0.06  
8215,0.068754,0.069073,0.068546,0.068311,0.068437,0.068429,0.067742,0.  
068067,0.068426,0.06892,0.068439,0.068468,0.068466,0.068174,0.068315,0  
.067964,0.068352,0.068499,0.068473,0.068518,0.068809,0.068768,0.068256  
,0.068289,0.068278,0.068166,0.068527,0.067632,0.068337,0.068166,0.0688  
02,0.068907,0.068159,0.06866,0.068377,0.06888,0.068115,0.067946,0.0685  
98,0.068011,0.068189,0.068323,0.068598,0.068481,0.067846,0.068802,0.06  
8569,0.068386,0.068389,0.068236,0.068427,0.068051,0.068404,0.06833,0.0  
68736,0.068794,0.068369,0.067742,0.068611,0.068616,0.068153,0.068426,0  
.068188,0.067903  
0.19926,0.20005,0.1994,0.19854,0.20006,0.19954,0.19892,0.19981,0.19897  
,0.2002,0.1994,0.19962,0.19948,0.19943,0.19998,0.20008,0.19959,0.20001  
,0.19956,0.19921,0.27738,0.30708,0.28793,0.28521,0.20001,0.2003,0.1996  
5,0.19968,0.19908,0.19991,0.19933,0.19957,0.19899,0.19903,0.2002,0.199  
58,0.19897,0.19919,0.19922,0.37091,0.28986,0.30373,0.28782,0.28036,0.2  
946,0.28831,0.19958,0.19961,0.19859,0.19969,0.2005,0.19791,0.20015,0.1  
9936,0.20046,0.19864,0.19929,0.20012,0.19957,0.19892,0.19922,0.37371,0  
.36966,0.28031,0.26058,0.29272,0.26336,0.28174,0.28711,0.28705,0.28652  
,0.19979,0.20031,0.19981,0.19969,0.2005,0.19885,0.20027,0.19974,0.1992  
3,0.19886,0.20091,0.1998,0.20035,0.1993,0.19894,0.36877,0.37441,0.3817  
5,0.28721,0.30199,0.27687,0.28527,0.2886,0.28716,0.29103,0.29415,0.290  
13,0.19961,0.2003,0.19974,0.19921,0.19941,0.20034,0.19892,0.20013,0.19  
915,0.19976,0.19945,0.19914,0.19992,0.20017,0.19986,0.1989,0.38355,0.3  
8047,0.37569,0.37634,0.30025,0.29406,0.28515,0.29367,0.28099,0.26926,0  
.29541,0.2901,0.26792,0.27457,0.2,0.19868,0.1997,0.20008,0.19993,0.199  
24,0.1992,0.19869,0.19902,0.20138,0.19892,0.19957,0.19996,0.19977,0.19  
924,0.19951,0.37692,0.37995,0.38162,0.36899,0.36769,0.37022,0.28678,0.  
29283,0.28017,0.29753,0.28429,0.30114,0.30903,0.29369,0.32018,0.28461,  
0.19853,0.19989,0.20019,0.1991,0.19855,0.19972,0.1998,0.20048,0.19959,  
0.19941,0.19955,0.19927,0.19937,0.19999,0.19944,0.19928,0.19923,0.3587  
,0.36918,0.35792,0.37908,0.36917,0.37172,0.2884,0.29541,0.2891,0.28395

,0.28812,0.29308,0.28291,0.3003,0.30527,0.30452,0.29442,0.20048,0.1989  
,0.19997,0.19929,0.20014,0.19971,0.20058,0.19916,0.19912,0.20004,0.199  
95,0.20017,0.20003,0.1298,0.13901,0.13506,0.20025,0.37269,0.36723,0.38  
17,0.37828,0.38651,0.38499,0.37816,0.28261,0.28368,0.2979,0.29259,0.27  
355,0.27052,0.28664,0.27414,0.27347,0.27146,0.29898,0.19894,0.1983,0.1  
9954,0.1989,0.19828,0.19931,0.20026,0.19919,0.20008,0.19961,0.19958,0.  
13321,0.11041,0.12894,0.13272,0.1319,0.12045,0.19918,0.37278,0.39375,0  
.37289,0.3763,0.37709,0.37078,0.37497,0.30258,0.28892,0.28901,0.2973,0  
.2708,0.31194,0.29708,0.28899,0.28842,0.28509,0.30309,0.20032,0.20025,  
0.20021,0.20022,0.1996,0.19922,0.19873,0.19943,0.19867,0.13173,0.13204  
,0.13529,0.13223,0.13193,0.1314,0.13337,0.12991,0.1379,0.19988,0.37335  
,0.37384,0.36556,0.36789,0.37458,0.37104,0.37417,0.29544,0.28504,0.291  
6,0.28678,0.30146,0.30938,0.28559,0.301,0.28586,0.30272,0.28619,0.2645  
2,0.20047,0.19969,0.19913,0.19947,0.20056,0.19918,0.13193,0.1301,0.130  
67,0.13169,0.13943,0.14275,0.13153,0.11706,0.13218,0.1336,0.13378,0.11  
353,0.37696,0.37404,0.37641,0.36785,0.3791,0.38207,0.38021,0.27986,0.2  
8364,0.30547,0.2838,0.2671,0.29769,0.28767,0.29836,0.27907,0.32043,0.2  
9448,0.29119,0.20071,0.1993,0.19947,0.14323,0.12604,0.1403,0.13159,0.1  
3238,0.12651,0.12475,0.13151,0.1393,0.13335,0.12082,0.12295,0.13872,0.  
13139,0.13204,0.3695,0.37863,0.38426,0.36715,0.374,0.36409,0.37677,0.3  
8091,0.37957,0.29043,0.29384,0.28863,0.30662,0.28997,0.28951,0.2836,0.  
28721,0.30054,0.31733,0.2873,0.13076,0.12868,0.13513,0.12378,0.13199,0  
.13184,0.13515,0.13441,0.1241,0.10465,0.13724,0.11871,0.1343,0.13268,0  
.13184,0.13763,0.13709,0.13025,0.37516,0.38657,0.3738,0.36647,0.38301,  
0.37021,0.38037,0.36421,0.36912,0.28208,0.25669,0.21762,0.19283,0.2107  
9,0.20518,0.21414,0.21513,0.21052,0.2177,0.22016,0.14433,0.13364,0.133  
12,0.13204,0.11825,0.1328,0.12604,0.12944,0.14553,0.13227,0.12288,0.13  
214,0.11716,0.13709,0.13937,0.13205,0.13212,0.11815,0.36896,0.36528,0.  
37187,0.36728,0.37595,0.38056,0.37135,0.37305,0.38573,0.22496,0.21801,  
0.21277,0.22449,0.21423,0.21153,0.20793,0.19767,0.21072,0.22304,0.2192  
4,0.1342,0.14375,0.1364,0.13151,0.12496,0.13191,0.13813,0.13394,0.1340  
7,0.13021,0.13956,0.11158,0.13181,0.1391,0.14342,0.14049,0.1467,0.1259  
,0.37717,0.37927,0.37192,0.38868,0.37853,0.37654,0.36969,0.21646,0.204  
87,0.18402,0.21096,0.20216,0.21218,0.22652,0.21652,0.22903,0.23338,0.2  
1248,0.21617,0.21258,0.13961,0.1517,0.11959,0.13112,0.13628,0.13198,0.  
12315,0.13488,0.13456,0.11501,0.13516,0.12045,0.12258,0.11469,0.13091,  
0.13278,0.15471,0.13145,0.38227,0.37824,0.36637,0.37882,0.37631,0.3590  
8,0.22248,0.17383,0.23204,0.2881,0.22,0.20242,0.20305,0.23715,0.21048,  
0.21297,0.24167,0.21405,0.21759,0.21623,0.13453,0.14288,0.1198,0.13162  
,0.12271,0.12782,0.12634,0.13679,0.13217,0.13301,0.13017,0.13168,0.124  
05,0.13006,0.13288,0.13614,0.13219,0.13278,0.376,0.37089,0.37737,0.368  
46,0.37289,0.21543,0.20517,0.22372,0.22794,0.21671,0.21803,0.21709,0.2  
1632,0.21203,0.21238,0.20766,0.22639,0.22457,0.20702,0.21654,0.11998,0  
.1154,0.12802,0.13197,0.13535,0.14413,0.13745,0.13294,0.13601,0.13487,  
0.14103,0.14013,0.13233,0.13235,0.13102,0.15121,0.13209,0.13231,0.3723  
8,0.37552,0.36725,0.19303,0.23147,0.22403,0.19916,0.23182,0.21945,0.21  
692,0.2171,0.21381,0.20176,0.21085,0.2124,0.18904,0.21195,0.19898,0.20  
181,0.21197,0.12564,0.13153,0.13183,0.141,0.13089,0.1403,0.121,0.12466  
,0.13256,0.13242,0.14281,0.13216,0.12084,0.118,0.13657,0.11939,0.13605  
,0.1313,0.37165,0.22007,0.21439,0.25355,0.25557,0.21465,0.21563,0.2363  
7,0.22255,0.22047,0.22815,0.23274,0.22441,0.21463,0.21968,0.2051,0.213  
94,0.21673,0.20929,0.13566,0.14082,0.15253,0.13314,0.13479,0.13696,0.1

0564,0.13332,0.13188,0.13237,0.13221,0.13233,0.15124,0.14119,0.14995,0.13194,0.13762,0.064297,0.22736,0.2177,0.23899,0.22507,0.19893,0.20598,0.22369,0.20081,0.20782,0.25092,0.21089,0.21313,0.22313,0.23377,0.21279,0.21008,0.21657,0.21503,0.20778,0.13989,0.1265,0.13542,0.12886,0.13227,0.13206,0.13929,0.13794,0.093299,0.13279,0.13291,0.13705,0.13326,0.1355,0.11082,0.11686,0.13315,0.064388,0.24556,0.25087,0.21868,0.19572,0.19497,0.21508,0.21803,0.2182,0.22511,0.2176,0.20837,0.21552,0.20821,0.20638,0.20602,0.21518,0.19473,0.20574,0.13176,0.1123,0.13255,0.13622,0.13201,0.12088,0.13135,0.1289,0.12704,0.13035,0.13164,0.13173,0.13286,0.13648,0.12112,0.13292,0.13776,0.12577,0.063939,0.19432,0.23454,0.24864,0.21701,0.21929,0.22054,0.22626,0.22133,0.20142,0.216,0.20477,0.21237,0.21615,0.21416,0.21333,0.21595,0.21419,0.21551,0.1265,0.1336,0.1315,0.1217,0.15987,0.13083,0.13174,0.13143,0.13108,0.14076,0.12976,0.13705,0.14259,0.12013,0.13423,0.13221,0.13126,0.064886,0.064528,0.063862,0.16658,0.21926,0.19995,0.22212,0.19714,0.22206,0.21365,0.23348,0.23837,0.22025,0.19958,0.20399,0.2017,0.2085,0.21263,0.12782,0.14275,0.13493,0.13149,0.13227,0.14633,0.12125,0.12656,0.13144,0.13225,0.15412,0.1363,0.12266,0.12336,0.13248,0.14562,0.12994,0.13216,0.064222,0.06419,0.064755,0.064233,0.22132,0.19801,0.22289,0.22071,0.21969,0.22153,0.23002,0.21886,0.22146,0.21663,0.2152,0.20116,0.13203,0.13527,0.13297,0.11996,0.13744,0.13194,0.13272,0.15632,0.13255,0.13186,0.12763,0.17975,0.11829,0.13609,0.13222,0.13294,0.12864,0.13227,0.10853,0.1321,0.064379,0.064551,0.064399,0.064753,0.064255,0.064416,0.19946,0.17681,0.23119,0.21618,0.21792,0.22441,0.24342,0.22287,0.12087,0.12266,0.13435,0.14485,0.12702,0.13355,0.13269,0.12617,0.14337,0.13073,0.12239,0.14488,0.13251,0.13766,0.13651,0.13173,0.12964,0.13205,0.12716,0.14031,0.13271,0.13011,0.14043,0.064454,0.064678,0.064694,0.064219,0.064464,0.064616,0.25843,0.22043,0.2203,0.24806,0.23405,0.064431,0.064381,0.13309,0.13076,0.141,0.12822,0.13184,0.11904,0.12217,0.12627,0.13442,0.12791,0.12057,0.12677,0.13872,0.13474,0.13205,0.13814,0.13677,0.14168,0.11488,0.12804,0.13181,0.064229,0.064309,0.064522,0.063958,0.064359,0.065106,0.0647,0.064871,0.064348,0.064369,0.22278,0.22136,0.064905,0.064256,0.06482,0.064388,0.13145,0.1345,0.12963,0.12767,0.11194,0.14477,0.13754,0.13206,0.13193,0.13183,0.13198,0.13122,0.11542,0.12607,0.13815,0.13192,0.13187,0.1454,0.12732,0.064325,0.064513,0.064207,0.064644,0.063951,0.064521,0.064705,0.064418,0.064627,0.064371,0.064342,0.064529,0.064446,0.064067,0.064577,0.064407,0.064837,0.13241,0.12884,0.15297,0.1444,0.12999,0.13238,0.12546,0.14924,0.14759,0.12623,0.1386,0.13287,0.13192,0.13188,0.13235,0.13215,0.064794,0.064214,0.064538,0.064911,0.064442,0.063744,0.063781,0.06485,0.065236,0.064651,0.06422,0.06424,0.064588,0.064451,0.065262,0.064337,0.064831,0.064837,0.064668,0.1154,0.13185,0.10766,0.13372,0.13205,0.13217,0.13091,0.12051,0.13198,0.13147,0.1383,0.13168,0.12358,0.064369,0.064852,0.064138,0.064651,0.064685,0.064628,0.064684,0.064475,0.064429,0.0651,0.065236,0.064563,0.064263,0.06459,0.064983,0.064441,0.064628,0.064569,0.064447,0.064467,0.064775,0.13212,0.13213,0.13267,0.13682,0.12583,0.14394,0.13261,0.1403,0.14127,0.064532,0.064726,0.064918,0.064729,0.064633,0.064719,0.063907,0.06448,0.064118,0.064724,0.064615,0.063853,0.06504,0.064911,0.064517,0.064271,0.064332,0.063843,0.064382,0.064594,0.064164,0.064323,0.064616,0.064555,0.064708,0.14167,0.13762,0.12531,0.12485,0.064007,0.064336,0.064764,0.064619,0.064794,0.064608,0.06462,0.064515,0.064413,0.064663,0.064422,0.064407,0.064572,0.064867,0.064229,0.065163,0.064309,0.0648,0.063643,0.064639,



0.064906,0.064469,0.06408,0.064671,0.064212,0.064751,0.064528,0.064482  
,0.06447,0.064726,0.064237,0.06421,0.064704,0.064609,0.064712,0.064401  
,0.064667,0.064592,0.06454,0.064301,0.064109,0.064475,0.064534,0.06472  
,0.064091,0.064733,0.06414,0.063951,0.064814,0.064331,0.064206,0.06452  
3,0.06459,0.064139,0.064777,0.064577,0.064242,0.064189,0.064003,0.0641  
79,0.064146,0.064669,0.063993,0.063982,0.064344,0.064582,0.064332,0.06  
4505,0.064406,0.064463,0.064953,0.064113,0.064342,0.064827,0.064268,0.  
064528,0.064422,0.064584,0.064523,0.064642,0.064566,0.064753,0.065186,  
0.064436,0.064558,0.064693,0.064566,0.064445,0.064437,0.06452,0.064653  
,0.06412,0.06412,0.065043,0.064667,0.064092,0.064732,0.064528,0.064382  
,0.064232,0.064434,0.064757,0.064644,0.064735,0.064832,0.064,0.064644,  
0.063581,0.064877,0.06492,0.064239,0.064256,0.064494,0.064731,0.063946  
,0.065036,0.064765,0.064577,0.063944,0.063517,0.064251,0.065193,0.0642  
77,0.064296,0.064441,0.064268,0.064482,0.064344,0.064838,0.064331,0.06  
4597,0.064716,0.065179,0.064698,0.064407,0.064327,0.064517,0.063996,0.  
064261,0.064355,0.065125,0.064589,0.064721,0.064577,0.064197,0.064394,  
0.064134,0.064383,0.064563,0.064612,0.0646,0.06483,0.065035,0.064543,0.  
.064392,0.06437,0.064105,0.064452,0.063761,0.064531,0.064161,0.064922,  
0.065057,0.064337,0.064913,0.064585,0.064942,0.064104,0.064056,0.06479  
8,0.064239,0.064312,0.06431,0.064746,0.064607,0.063851,0.064844,0.0648  
1,0.064444,0.064543,0.064394,0.064476,0.064037,0.064539,0.064413,0.064  
793,0.064822,0.064517,0.063765,0.064818,0.064881,0.064453,0.064334,0.0  
64387,0.063868

0.20055,0.20115,0.20097,0.20047,0.20091,0.20082,0.20079,0.20098,0.2002  
9,0.20169,0.20094,0.20079,0.20107,0.20061,0.20104,0.20179,0.20094,0.20  
112,0.20111,0.20053,0.27659,0.30265,0.28621,0.28365,0.20143,0.20182,0.  
20102,0.20142,0.20088,0.20132,0.20055,0.20039,0.20055,0.20055,0.20151,  
0.20106,0.20062,0.20087,0.2009,0.36544,0.28589,0.29737,0.28551,0.28004  
,0.29176,0.28785,0.2011,0.20122,0.19966,0.20147,0.20158,0.19973,0.2013  
6,0.20095,0.20157,0.20023,0.2007,0.20149,0.20058,0.20033,0.20047,0.367  
01,0.36555,0.27826,0.25907,0.28972,0.26223,0.27806,0.28633,0.28445,0.2  
8607,0.20099,0.20148,0.20138,0.20092,0.2022,0.20005,0.201,0.2011,0.201  
01,0.19999,0.20218,0.20107,0.20144,0.2009,0.20039,0.36717,0.36966,0.37  
71,0.28789,0.30158,0.2747,0.28172,0.28621,0.28634,0.28844,0.29045,0.28  
746,0.20102,0.20169,0.20129,0.20093,0.20067,0.20179,0.20057,0.20189,0.  
20067,0.20083,0.20061,0.20097,0.20159,0.2013,0.20095,0.20067,0.37636,0  
.37521,0.3693,0.37265,0.2966,0.29272,0.28464,0.2911,0.27916,0.26659,0.  
29479,0.28924,0.26726,0.27322,0.2012,0.20007,0.20123,0.20143,0.20126,0.  
.20047,0.20013,0.20012,0.20048,0.20271,0.2006,0.20088,0.20142,0.20075,  
0.20074,0.20072,0.37176,0.37893,0.3794,0.36553,0.36166,0.36064,0.28753  
,0.29087,0.27904,0.29368,0.28176,0.29775,0.3045,0.2903,0.31737,0.28271  
,0.20012,0.2012,0.20139,0.20061,0.2002,0.20087,0.20111,0.20182,0.20045  
,0.20069,0.20067,0.20067,0.20107,0.20108,0.20095,0.20048,0.2002,0.3533  
8,0.3629,0.36302,0.36952,0.36257,0.36554,0.28848,0.29348,0.28676,0.280  
42,0.286,0.2882,0.27865,0.29705,0.30126,0.29786,0.29149,0.20128,0.2001  
1,0.20109,0.20069,0.20178,0.20133,0.20199,0.20039,0.2003,0.20165,0.201  
2,0.20159,0.20125,0.12858,0.13835,0.13418,0.20196,0.3661,0.36224,0.371  
56,0.37092,0.37783,0.37702,0.37341,0.28061,0.2812,0.29707,0.28953,0.27  
136,0.26952,0.28518,0.27399,0.27187,0.26954,0.29741,0.20047,0.19977,0.  
20078,0.20027,0.20015,0.20081,0.20109,0.20062,0.20186,0.20103,0.20084,  
0.13218,0.1087,0.12804,0.13144,0.1307,0.11923,0.20036,0.36921,0.38948,  
0.37253,0.37239,0.36956,0.3659,0.37055,0.29951,0.2861,0.2851,0.29558,0

.26766,0.30874,0.29499,0.28747,0.288,0.28331,0.29886,0.20171,0.20174,0.20118,0.20221,0.20052,0.20063,0.20022,0.20041,0.20017,0.13083,0.13106,0.13429,0.13137,0.13084,0.13114,0.13247,0.12915,0.13723,0.20149,0.37252,0.36929,0.36074,0.36167,0.37085,0.3669,0.37507,0.29378,0.28304,0.28927,0.28125,0.29976,0.30621,0.28523,0.29759,0.28495,0.29934,0.28404,0.26231,0.20186,0.20099,0.20056,0.20084,0.20205,0.20098,0.13102,0.12932,0.12964,0.13072,0.13887,0.14228,0.13054,0.11573,0.13121,0.13259,0.13301,0.11215,0.37182,0.36714,0.36982,0.36307,0.37401,0.37515,0.3722,0.27936,0.28055,0.30055,0.28084,0.26632,0.29505,0.28475,0.29597,0.27646,0.31427,0.29067,0.28905,0.20171,0.20116,0.20068,0.14276,0.12513,0.13974,0.13055,0.13149,0.12541,0.12362,0.13091,0.13904,0.13252,0.11945,0.12167,0.13785,0.13034,0.13114,0.36638,0.37462,0.37903,0.36386,0.368,0.35484,0.37463,0.37707,0.37155,0.28746,0.29234,0.28406,0.30265,0.28934,0.28984,0.28062,0.28587,0.29816,0.3122,0.28556,0.12995,0.12756,0.13413,0.12273,0.13121,0.13084,0.13424,0.13358,0.12279,0.10278,0.13657,0.1175,0.13343,0.13189,0.13099,0.13678,0.13603,0.12941,0.3677,0.3815,0.36692,0.36252,0.38095,0.35719,0.37001,0.36081,0.36757,0.28086,0.2557,0.21598,0.19041,0.20917,0.20257,0.21315,0.21227,0.2078,0.21439,0.21839,0.14404,0.1331,0.13221,0.13097,0.11681,0.13193,0.12496,0.12832,0.14531,0.13135,0.1219,0.1312,0.11563,0.13602,0.13872,0.13116,0.1313,0.11672,0.36164,0.36039,0.3624,0.36661,0.36784,0.37486,0.36758,0.36617,0.38156,0.22177,0.21549,0.20975,0.2223,0.21081,0.20884,0.20429,0.19604,0.20818,0.22015,0.21701,0.1333,0.1431,0.13577,0.13072,0.12371,0.13089,0.1376,0.13275,0.1333,0.12932,0.1387,0.11013,0.13071,0.13851,0.14305,0.13983,0.14627,0.12506,0.36733,0.37407,0.36279,0.3841,0.37314,0.37276,0.36273,0.21336,0.19963,0.18111,0.20923,0.19994,0.20786,0.22438,0.21342,0.2257,0.23119,0.20972,0.21232,0.20702,0.13878,0.15183,0.11809,0.13028,0.13549,0.13117,0.12211,0.13444,0.13358,0.11368,0.13431,0.11917,0.1217,0.11343,0.12988,0.13195,0.15432,0.1307,0.38035,0.37331,0.35695,0.37379,0.37138,0.35139,0.21741,0.16988,0.22537,0.28373,0.21337,0.20051,0.20118,0.23344,0.20815,0.20918,0.23899,0.2088,0.21539,0.2142,0.13404,0.14229,0.11847,0.13074,0.12163,0.127,0.12524,0.136,0.13142,0.13189,0.12904,0.13085,0.12329,0.12893,0.13206,0.13529,0.1312,0.13158,0.36999,0.36384,0.37477,0.36421,0.36833,0.20972,0.20159,0.21914,0.22439,0.2136,0.21289,0.21517,0.21367,0.21007,0.20988,0.20384,0.22424,0.2215,0.2048,0.21386,0.11864,0.11381,0.12665,0.13109,0.13435,0.14356,0.1367,0.1318,0.13553,0.13417,0.14031,0.13941,0.13147,0.13146,0.12981,0.15086,0.13089,0.13114,0.3666,0.3673,0.36396,0.19092,0.22956,0.21887,0.19652,0.22484,0.21629,0.21333,0.21259,0.21118,0.19859,0.20943,0.21035,0.18695,0.20923,0.19712,0.20029,0.20919,0.12469,0.13045,0.13098,0.14051,0.13002,0.13947,0.11983,0.1234,0.13164,0.13147,0.14229,0.13127,0.11971,0.11659,0.13589,0.11801,0.13548,0.13017,0.37118,0.21595,0.21124,0.24996,0.24965,0.21053,0.21081,0.23078,0.21685,0.21716,0.2261,0.23101,0.22061,0.21292,0.21747,0.20152,0.20932,0.21245,0.2074,0.13476,0.1401,0.15225,0.13226,0.13401,0.13626,0.1043,0.13257,0.13086,0.13145,0.13128,0.1313,0.15084,0.14046,0.14948,0.13103,0.13677,0.061081,0.22379,0.21471,0.23552,0.22097,0.19191,0.20237,0.21981,0.19648,0.20396,0.24844,0.20886,0.20783,0.22106,0.23309,0.2096,0.20733,0.21299,0.21138,0.2055,0.13941,0.12542,0.13473,0.12795,0.13136,0.13101,0.13871,0.13747,0.090769,0.13191,0.13182,0.13614,0.13255,0.1347,0.10929,0.11548,0.13207,0.061306,0.2402,0.24622,0.21394,0.19321,0.19113,0.21052,0.21428,0.21313,0.22064,0.21303,0.20837,0.21279,0.20548,0.20407,0.20307,0.21207,0.19299,0.20353,0.13075,0.11067,0.13161,0

.13562,0.13085,0.11963,0.13051,0.12791,0.12595,0.12936,0.13077,0.13067,0.13196,0.13567,0.12024,0.13201,0.13712,0.12452,0.060865,0.18964,0.22886,0.24463,0.21192,0.21233,0.21714,0.2201,0.21649,0.1972,0.2123,0.20316,0.21095,0.21375,0.21428,0.21338,0.21272,0.21246,0.21327,0.12553,0.13305,0.13058,0.12055,0.15966,0.12989,0.13076,0.13061,0.12965,0.14004,0.12848,0.13658,0.14186,0.11857,0.13349,0.13111,0.13041,0.061684,0.061592,0.06073,0.16142,0.21636,0.19722,0.21876,0.19336,0.21684,0.20829,0.22557,0.23524,0.21916,0.19688,0.20084,0.19963,0.20541,0.20991,0.12693,0.14203,0.13422,0.13042,0.13115,0.14595,0.12008,0.1254,0.13046,0.1312,0.15437,0.13564,0.1217,0.12232,0.13146,0.1453,0.12893,0.13149,0.06086,0.060968,0.061707,0.06095,0.21757,0.19425,0.21759,0.21348,0.21531,0.21712,0.22442,0.21565,0.21822,0.21433,0.21255,0.20052,0.13103,0.13435,0.13203,0.11874,0.13668,0.13096,0.13199,0.15608,0.1317,0.13089,0.12655,0.18047,0.11691,0.13551,0.13132,0.13218,0.1276,0.13155,0.10684,0.13124,0.061278,0.061547,0.061336,0.061526,0.061295,0.061256,0.19546,0.17314,0.22872,0.21492,0.21344,0.21882,0.23773,0.21748,0.1198,0.12139,0.13347,0.14446,0.1259,0.13257,0.13178,0.12471,0.14263,0.12976,0.12132,0.1446,0.1315,0.13679,0.1355,0.13086,0.12864,0.13119,0.12614,0.13953,0.13194,0.129,0.13988,0.061527,0.061476,0.061357,0.061111,0.061158,0.061224,0.25487,0.2167,0.21764,0.24145,0.23026,0.061316,0.061115,0.13226,0.12993,0.1406,0.12717,0.13083,0.11761,0.1206,0.12527,0.13367,0.12703,0.1193,0.1256,0.13816,0.13413,0.13104,0.13723,0.13612,0.14106,0.11362,0.12683,0.1307,0.06085,0.061332,0.061198,0.060634,0.061257,0.061927,0.061692,0.06164,0.061355,0.061164,0.21985,0.21606,0.061845,0.061152,0.061667,0.061257,0.13058,0.1336,0.1286,0.12694,0.1104,0.14431,0.1369,0.13135,0.13103,0.13102,0.1311,0.13025,0.11363,0.12502,0.13748,0.13092,0.13092,0.14468,0.12629,0.061087,0.061279,0.061174,0.061435,0.061033,0.061375,0.061306,0.061259,0.061408,0.061185,0.061232,0.061412,0.061284,0.060844,0.061194,0.06106,0.061634,0.13134,0.1278,0.15294,0.1438,0.12901,0.13156,0.12422,0.14906,0.14721,0.12519,0.1378,0.13194,0.13108,0.13067,0.13152,0.13106,0.061671,0.061164,0.061317,0.061841,0.061281,0.060582,0.060704,0.061611,0.061874,0.061485,0.061307,0.061203,0.061511,0.061284,0.061811,0.061022,0.061678,0.061658,0.061659,0.11422,0.13069,0.10612,0.13279,0.13103,0.13112,0.12979,0.11906,0.13119,0.13047,0.13741,0.13069,0.12232,0.061315,0.061878,0.061011,0.06145,0.061601,0.061242,0.061413,0.061236,0.061325,0.061914,0.061863,0.061441,0.061161,0.061344,0.061769,0.061403,0.061432,0.061354,0.06123,0.061344,0.061588,0.13141,0.13109,0.13184,0.1359,0.12441,0.14327,0.13165,0.13972,0.14047,0.061311,0.061625,0.061759,0.061469,0.061419,0.061572,0.060996,0.061144,0.060947,0.061393,0.061226,0.060667,0.061812,0.061647,0.061326,0.061035,0.061061,0.060864,0.061289,0.061351,0.060991,0.061121,0.061413,0.061449,0.061292,0.14067,0.13683,0.12431,0.12359,0.061041,0.061088,0.061532,0.061462,0.061571,0.061444,0.061436,0.061017,0.061177,0.061375,0.061089,0.061407,0.061531,0.061654,0.061058,0.062117,0.061072,0.061747,0.060443,0.061524,0.061792,0.061241,0.060868,0.061447,0.060822,0.061503,0.061334,0.06132,0.061284,0.061643,0.060956,0.060918,0.061576,0.061298,0.061643,0.06116,0.061364,0.061332,0.061216,0.06112,0.06074,0.061222,0.061265,0.061485,0.060984,0.061329,0.060775,0.060874,0.061818,0.061359,0.061146,0.061045,0.061432,0.061093,0.061563,0.061448,0.061238,0.061113,0.060854,0.060983,0.061239,0.061409,0.060689,0.060936,0.061243,0.061388,0.061174,0.061442,0.061239,0.061335,0.061658,0.061147,0.061258,0.061423,0.061144,0.061429,0.061327,0.06146,0.061398,0.061573,0.061504,0.061642,0.061

748,0.061148,0.061567,0.061616,0.061394,0.061209,0.06123,0.061338,0.06  
1242,0.060941,0.060886,0.061851,0.061521,0.060991,0.061592,0.061604,0.  
061291,0.061234,0.061293,0.061782,0.061451,0.061523,0.061301,0.060984,  
0.061488,0.060569,0.061603,0.061715,0.06101,0.061069,0.06119,0.061615,  
0.061046,0.061882,0.061704,0.061365,0.060794,0.060354,0.061106,0.06206  
2,0.061255,0.061221,0.061283,0.061042,0.06155,0.061335,0.061606,0.0610  
44,0.061539,0.061626,0.06195,0.061579,0.061253,0.061053,0.061124,0.060  
871,0.061185,0.061153,0.061985,0.061367,0.061575,0.06152,0.061031,0.06  
1352,0.06106,0.061026,0.0613,0.061243,0.061586,0.061399,0.061967,0.061  
674,0.061092,0.061383,0.060988,0.061195,0.060696,0.061251,0.061043,0.0  
61621,0.061841,0.061115,0.061981,0.061349,0.061681,0.061281,0.060894,0  
.061533,0.061147,0.061233,0.061128,0.061529,0.061465,0.060726,0.061545  
,0.06174,0.061298,0.061402,0.061403,0.061356,0.060913,0.061441,0.06128  
5,0.061792,0.061601,0.061336,0.060573,0.061679,0.061775,0.061187,0.061  
181,0.061163,0.061047  
0.20196,0.20217,0.20237,0.20126,0.20215,0.20179,0.20184,0.20186,0.2013  
3,0.20297,0.202,0.20234,0.20235,0.20187,0.20189,0.20286,0.20254,0.2022  
5,0.20165,0.20175,0.27637,0.30198,0.28507,0.2831,0.20254,0.20274,0.202  
43,0.20264,0.20188,0.20271,0.20142,0.2014,0.20166,0.20176,0.20295,0.20  
187,0.20146,0.20202,0.20215,0.35784,0.28519,0.29435,0.2849,0.27729,0.2  
9172,0.28628,0.20242,0.20251,0.20126,0.20264,0.20286,0.20094,0.20257,0  
.20194,0.20261,0.20107,0.20182,0.20234,0.20198,0.20119,0.20137,0.3615,  
0.35907,0.27588,0.25842,0.28803,0.26241,0.27724,0.28533,0.28181,0.2848  
5,0.20223,0.20234,0.20283,0.20251,0.20337,0.20152,0.20239,0.20202,0.20  
204,0.20135,0.20319,0.20244,0.20264,0.20191,0.20129,0.36906,0.3661,0.3  
8009,0.28426,0.29942,0.27215,0.28022,0.28308,0.28227,0.28738,0.28991,0  
.28683,0.20222,0.20256,0.20249,0.20226,0.20192,0.20271,0.20199,0.20331  
,0.20203,0.2017,0.20186,0.20219,0.20257,0.2028,0.20189,0.20194,0.37035  
,0.37154,0.36881,0.36758,0.29616,0.28905,0.2822,0.28804,0.27616,0.2660  
5,0.29425,0.28803,0.26457,0.27134,0.20256,0.20098,0.20268,0.20271,0.20  
221,0.2016,0.20125,0.20161,0.20174,0.20401,0.20173,0.2021,0.2026,0.202  
05,0.20208,0.2022,0.36954,0.37888,0.37293,0.36522,0.36191,0.3605,0.284  
34,0.28797,0.2788,0.29259,0.28016,0.29428,0.30337,0.28922,0.31711,0.28  
238,0.20121,0.20264,0.20226,0.20155,0.20142,0.20225,0.2022,0.20335,0.2  
0183,0.20179,0.20207,0.20163,0.20241,0.20212,0.20184,0.20118,0.2018,0.  
34955,0.3598,0.35784,0.36133,0.36295,0.36169,0.28748,0.29146,0.2851,0.  
2793,0.28517,0.28961,0.2776,0.29359,0.30123,0.295,0.29152,0.20276,0.20  
109,0.20231,0.20196,0.20259,0.20229,0.2032,0.20182,0.20136,0.20296,0.2  
028,0.20255,0.20276,0.12756,0.13753,0.13341,0.20323,0.36364,0.35623,0.  
36952,0.36763,0.36752,0.38109,0.36654,0.28114,0.2787,0.29435,0.28827,0  
.2682,0.26753,0.28404,0.27311,0.27162,0.26736,0.29577,0.20186,0.20122,  
0.20147,0.20176,0.20099,0.20215,0.2022,0.20216,0.20308,0.20228,0.20193  
,0.13159,0.10767,0.1273,0.13067,0.1298,0.11839,0.20162,0.3646,0.38216,  
0.36723,0.36653,0.36718,0.36149,0.3703,0.29557,0.28536,0.28628,0.29434  
,0.26721,0.30435,0.29445,0.28709,0.28679,0.28205,0.30011,0.20293,0.203  
24,0.20242,0.20326,0.20155,0.20202,0.20143,0.20172,0.20152,0.13017,0.1  
3021,0.1336,0.1307,0.13,0.13026,0.13166,0.12853,0.13653,0.20283,0.3688  
3,0.36695,0.35121,0.35699,0.36795,0.36562,0.36808,0.2943,0.28028,0.288  
13,0.28137,0.30084,0.30407,0.2849,0.29407,0.28201,0.29553,0.28285,0.26  
031,0.2027,0.20201,0.20204,0.20191,0.20319,0.20198,0.13039,0.12864,0.1  
2902,0.1305,0.13839,0.14184,0.12992,0.11447,0.13055,0.13171,0.13237,0.  
11073,0.36753,0.36483,0.36938,0.36039,0.37078,0.37203,0.37055,0.2795,0

.27997,0.29741,0.2791,0.26688,0.29305,0.2839,0.29529,0.27521,0.30853,0.28912,0.28782,0.20319,0.20235,0.20235,0.14249,0.12423,0.13884,0.12989,0.13067,0.12457,0.12248,0.13035,0.13859,0.13206,0.11845,0.12086,0.13718,0.12983,0.13043,0.36409,0.3745,0.37334,0.35937,0.36792,0.34921,0.36759,0.3714,0.36569,0.28487,0.2932,0.28176,0.29943,0.28821,0.28685,0.27994,0.28434,0.29587,0.31108,0.28271,0.12937,0.12691,0.13352,0.12175,0.13052,0.13005,0.13377,0.13285,0.12177,0.10127,0.13593,0.11663,0.13284,0.13142,0.13031,0.13627,0.13558,0.12867,0.36666,0.37679,0.36837,0.35979,0.36969,0.35791,0.36563,0.35801,0.3622,0.27868,0.25477,0.21432,0.18803,0.20797,0.2003,0.21015,0.21049,0.20568,0.21276,0.21673,0.14353,0.13244,0.13163,0.12996,0.11593,0.1312,0.12403,0.12742,0.14454,0.13059,0.1209,0.13039,0.11468,0.13522,0.13827,0.13022,0.13048,0.11543,0.35835,0.35502,0.35967,0.36563,0.36674,0.37096,0.36716,0.36459,0.37394,0.22039,0.21342,0.20786,0.22046,0.20854,0.20777,0.20447,0.194,0.20616,0.21719,0.21392,0.13276,0.14226,0.13495,0.13029,0.12263,0.12996,0.13715,0.13219,0.1327,0.12852,0.13817,0.10863,0.12984,0.13836,0.14245,0.13926,0.14557,0.1241,0.36404,0.36812,0.35943,0.37889,0.3698,0.3722,0.36535,0.20932,0.19729,0.17742,0.2063,0.1981,0.20585,0.22407,0.21122,0.2227,0.22754,0.2088,0.21033,0.20614,0.13829,0.15155,0.11711,0.12973,0.13484,0.1305,0.12116,0.13389,0.13273,0.11237,0.13362,0.11827,0.12061,0.11209,0.12904,0.13144,0.15413,0.13014,0.37167,0.37254,0.35383,0.37044,0.36677,0.35041,0.21728,0.1677,0.22125,0.27955,0.20999,0.19866,0.19983,0.23147,0.20754,0.20666,0.23653,0.20788,0.21231,0.2115,0.13333,0.14169,0.11754,0.13007,0.12037,0.12613,0.12437,0.13543,0.13063,0.13117,0.12831,0.13025,0.12234,0.12827,0.1312,0.13469,0.13063,0.13086,0.3659,0.35202,0.37482,0.35634,0.36635,0.20696,0.20061,0.21433,0.22073,0.21251,0.20914,0.21354,0.21146,0.20726,0.20696,0.20062,0.22238,0.2197,0.20424,0.21157,0.11788,0.11262,0.12563,0.13031,0.13372,0.14278,0.13611,0.13116,0.13505,0.13352,0.13989,0.13895,0.13073,0.13075,0.1289,0.15042,0.13017,0.13069,0.36548,0.36184,0.35904,0.18705,0.22519,0.21508,0.19516,0.22294,0.21068,0.20932,0.20794,0.20851,0.19687,0.20626,0.20967,0.18609,0.20815,0.19472,0.19877,0.20697,0.12377,0.12966,0.1302,0.13983,0.12952,0.13897,0.11864,0.12246,0.13087,0.13047,0.14169,0.13042,0.11852,0.11553,0.13525,0.11709,0.13479,0.12953,0.36404,0.21203,0.20865,0.24972,0.24909,0.20539,0.20662,0.22813,0.21341,0.21318,0.2233,0.23024,0.21753,0.21106,0.21345,0.20043,0.20625,0.20969,0.2067,0.13429,0.1398,0.15216,0.13173,0.13341,0.13546,0.10292,0.13205,0.13017,0.13063,0.13055,0.13072,0.15061,0.14003,0.14916,0.1303,0.13626,0.058471,0.21907,0.2113,0.23163,0.2149,0.18889,0.19898,0.21751,0.19185,0.20145,0.24651,0.20631,0.20519,0.21979,0.23146,0.20829,0.20551,0.21007,0.20761,0.20346,0.13874,0.12454,0.13421,0.12698,0.13061,0.13051,0.13833,0.13724,0.089088,0.13147,0.131,0.13572,0.13192,0.13414,0.10809,0.1143,0.13132,0.058631,0.2366,0.24099,0.21049,0.19047,0.18679,0.20904,0.21143,0.20896,0.218,0.20806,0.2061,0.21035,0.20236,0.20315,0.20077,0.2103,0.19222,0.20183,0.1302,0.10932,0.13094,0.13486,0.13006,0.1187,0.12991,0.12702,0.12514,0.1285,0.1299,0.13001,0.13135,0.1351,0.11924,0.13127,0.13653,0.12361,0.058225,0.18535,0.22561,0.24169,0.21026,0.21043,0.21637,0.21784,0.21327,0.19365,0.2093,0.20099,0.20871,0.21074,0.21164,0.21103,0.21007,0.21036,0.21064,0.12472,0.13236,0.13013,0.1195,0.15985,0.12912,0.13026,0.13014,0.12898,0.13956,0.12791,0.13613,0.14138,0.11749,0.13285,0.13035,0.1299,0.058995,0.058721,0.058232,0.15891,0.21135,0.1959,0.21696,0.19104,0.21463,0.20568,0.22251,0.23287,0.21729,0.19497,0.19927,0.19855,0.20453,0.20889,0.12593,0.14

168,0.1336,0.12991,0.13048,0.14555,0.11903,0.12467,0.12987,0.13057,0.1  
5417,0.135,0.12068,0.12157,0.13094,0.14512,0.12825,0.13082,0.058221,0.  
058412,0.058957,0.058448,0.21552,0.19072,0.21455,0.21056,0.21237,0.211  
46,0.22103,0.21257,0.21559,0.21227,0.20972,0.19842,0.13032,0.13392,0.1  
314,0.11782,0.13575,0.13014,0.13081,0.15611,0.13101,0.13017,0.12564,0.  
18095,0.11577,0.13473,0.1306,0.13156,0.12698,0.13079,0.10548,0.13037,0  
.058663,0.058831,0.058675,0.059102,0.058709,0.058627,0.19204,0.1714,0.  
22525,0.21232,0.21046,0.21566,0.23309,0.2148,0.11898,0.12048,0.13286,0  
.14411,0.12489,0.13196,0.13128,0.12371,0.14205,0.12923,0.12034,0.14433  
,0.13085,0.13644,0.13493,0.13049,0.12793,0.13028,0.1252,0.13883,0.1313  
2,0.12804,0.1391,0.058996,0.058906,0.058767,0.058667,0.058379,0.058691  
,0.25147,0.2116,0.21615,0.23798,0.22717,0.058762,0.058496,0.13172,0.12  
927,0.13996,0.12611,0.13039,0.11653,0.11987,0.12457,0.13279,0.12613,0.  
11829,0.12476,0.1375,0.13337,0.13019,0.13651,0.13535,0.14055,0.11251,0  
.12568,0.12991,0.058364,0.058833,0.058775,0.058172,0.058648,0.059228,0  
.058926,0.059234,0.058632,0.058611,0.21419,0.21364,0.05923,0.058524,0.  
059066,0.05885,0.12993,0.13315,0.12784,0.12594,0.10912,0.14376,0.1361,  
0.13016,0.13038,0.13012,0.13067,0.12966,0.11262,0.12395,0.13672,0.1301  
4,0.13028,0.14427,0.12558,0.058666,0.058637,0.058382,0.05881,0.05837,0  
.058688,0.058758,0.058627,0.059035,0.058621,0.058689,0.058647,0.058609  
,0.058478,0.058638,0.058483,0.058887,0.13057,0.12715,0.15248,0.14333,0  
.12837,0.13074,0.12319,0.14873,0.14719,0.12417,0.13687,0.1312,0.13039,  
0.1302,0.13088,0.13024,0.05897,0.058519,0.058702,0.059546,0.058874,0.0  
57977,0.058172,0.059016,0.059195,0.059032,0.058663,0.058582,0.059082,0  
.058584,0.059318,0.058434,0.059016,0.058934,0.058913,0.11294,0.12998,0  
.10473,0.13204,0.13011,0.13029,0.12896,0.118,0.13035,0.12989,0.1369,0.  
13012,0.12148,0.058352,0.059154,0.058413,0.058568,0.058928,0.058713,0.  
058822,0.058707,0.058937,0.059226,0.059049,0.058737,0.058615,0.058788,  
0.059152,0.058733,0.058814,0.058818,0.058711,0.058928,0.059221,0.13062  
,0.13092,0.13098,0.13532,0.12369,0.14298,0.13118,0.13931,0.13998,0.058  
674,0.059002,0.059065,0.058866,0.058952,0.05902,0.058371,0.058699,0.05  
8328,0.059011,0.058656,0.058013,0.059206,0.05897,0.058912,0.058766,0.0  
58699,0.05833,0.058777,0.05878,0.058167,0.058711,0.058523,0.05905,0.05  
8634,0.14022,0.13625,0.12326,0.12263,0.05828,0.05854,0.059204,0.058992  
,0.058784,0.058829,0.058677,0.058239,0.058544,0.058932,0.058204,0.0586  
78,0.058825,0.058907,0.058451,0.059459,0.058386,0.059102,0.057987,0.05  
8828,0.059113,0.058706,0.058352,0.059119,0.058152,0.058926,0.058946,0.  
05878,0.058777,0.058917,0.058249,0.058241,0.05901,0.058528,0.05889,0.0  
58678,0.058737,0.058751,0.05886,0.058516,0.058056,0.058736,0.058641,0.  
058847,0.058526,0.058807,0.058248,0.058298,0.059167,0.058932,0.05878,0  
.058531,0.058838,0.058708,0.058811,0.058722,0.058578,0.058464,0.058421  
,0.058444,0.058686,0.058685,0.058332,0.058243,0.058471,0.058676,0.0587  
07,0.058836,0.058579,0.058772,0.059126,0.058655,0.058468,0.058976,0.05  
8712,0.058882,0.058646,0.058937,0.058752,0.058995,0.058813,0.059174,0.  
059052,0.058644,0.05891,0.058859,0.058721,0.058651,0.05857,0.058777,0.  
058639,0.058687,0.058448,0.059276,0.058726,0.058544,0.059155,0.059001,  
0.058812,0.058683,0.058682,0.059082,0.058903,0.058903,0.058562,0.05851  
2,0.058823,0.058029,0.05901,0.05914,0.058504,0.058569,0.058666,0.05905  
6,0.058394,0.059092,0.059161,0.058876,0.058134,0.057827,0.058523,0.059  
442,0.058589,0.058559,0.058649,0.058367,0.059029,0.058844,0.059071,0.0  
58528,0.058909,0.058897,0.05925,0.058853,0.058551,0.058525,0.058558,0.  
058195,0.058847,0.058402,0.059316,0.059044,0.058741,0.058896,0.058174,

0.05861,0.058391,0.058478,0.058818,0.058772,0.059105,0.058781,0.05941,  
0.058793,0.058354,0.058746,0.05824,0.058556,0.058084,0.0587,0.058534,0  
.059099,0.058999,0.05851,0.059314,0.058961,0.058989,0.058917,0.05832,0  
.059088,0.058403,0.058563,0.058693,0.059065,0.058805,0.058181,0.058929  
,0.059009,0.058573,0.058721,0.058571,0.058802,0.058328,0.058891,0.0585  
63,0.059174,0.059015,0.0589,0.058019,0.059093,0.059305,0.058362,0.0584  
18,0.058407,0.058417  
0.20314,0.20312,0.20327,0.20252,0.20321,0.20273,0.20283,0.20279,0.2026  
4,0.20381,0.20319,0.20339,0.20323,0.20295,0.20291,0.20382,0.20352,0.20  
378,0.20239,0.20257,0.27621,0.30013,0.28308,0.2826,0.20356,0.20428,0.2  
04,0.20312,0.20321,0.20371,0.20278,0.20253,0.20283,0.20307,0.20415,0.2  
0305,0.20244,0.20299,0.20324,0.35366,0.28543,0.29609,0.28424,0.27768,0  
.28931,0.28571,0.20347,0.20328,0.20211,0.20312,0.20368,0.20213,0.20341  
,0.2028,0.20351,0.20247,0.20273,0.20354,0.20312,0.20222,0.20248,0.3583  
5,0.35841,0.27537,0.25721,0.28544,0.26134,0.27689,0.28399,0.28137,0.28  
355,0.203,0.20299,0.20381,0.2034,0.20402,0.20275,0.20355,0.20284,0.202  
93,0.20234,0.20419,0.20355,0.20364,0.2032,0.20253,0.36284,0.36154,0.37  
186,0.28253,0.29669,0.26898,0.27938,0.28129,0.28103,0.28686,0.28673,0.  
28418,0.20323,0.20351,0.20355,0.20324,0.20272,0.20352,0.20297,0.20426,  
0.20276,0.20257,0.20266,0.2033,0.2033,0.20348,0.2028,0.20295,0.36524,0  
.36583,0.3629,0.36311,0.29515,0.28657,0.28008,0.28952,0.27684,0.26584,  
0.29352,0.28878,0.26414,0.27165,0.20331,0.20244,0.20367,0.20357,0.2033  
9,0.20294,0.20261,0.20255,0.20304,0.20486,0.20308,0.20318,0.2035,0.202  
97,0.20272,0.20307,0.36562,0.37415,0.36875,0.36199,0.36013,0.35852,0.2  
8544,0.28575,0.27776,0.29173,0.27946,0.29516,0.30059,0.28735,0.31346,0  
.28154,0.20212,0.20386,0.20327,0.20243,0.20259,0.20339,0.20313,0.20425  
,0.20294,0.20302,0.20274,0.20294,0.20358,0.20318,0.20312,0.20215,0.203  
16,0.34963,0.35346,0.35671,0.36006,0.35785,0.36238,0.28647,0.28986,0.2  
8504,0.27955,0.28505,0.28762,0.27564,0.29409,0.29932,0.29508,0.29253,0  
.20391,0.20195,0.20302,0.20284,0.20367,0.20308,0.20447,0.20323,0.20271  
,0.20384,0.20384,0.20377,0.20368,0.12735,0.13695,0.13284,0.20413,0.360  
77,0.35345,0.36472,0.36524,0.3615,0.37249,0.36169,0.28125,0.27759,0.29  
161,0.28655,0.26784,0.26687,0.28395,0.27316,0.27242,0.26653,0.29802,0.  
20282,0.20283,0.20291,0.20294,0.20226,0.20347,0.20307,0.2026,0.20434,0  
.20319,0.20297,0.13113,0.10671,0.12659,0.12999,0.12905,0.11753,0.20244  
,0.35976,0.37782,0.36847,0.36332,0.36345,0.36011,0.36613,0.29439,0.283  
99,0.28437,0.29171,0.26637,0.3019,0.29327,0.28574,0.28518,0.28195,0.29  
636,0.20387,0.20377,0.20397,0.20456,0.20289,0.20294,0.20278,0.20304,0.  
20281,0.12968,0.1299,0.13292,0.13002,0.12962,0.12978,0.13108,0.12796,0  
.13629,0.20344,0.37138,0.36446,0.34507,0.35723,0.36133,0.36381,0.36354  
,0.29296,0.27848,0.28634,0.28173,0.29987,0.30555,0.28311,0.29241,0.282  
47,0.29774,0.28294,0.26104,0.20371,0.20306,0.20279,0.20273,0.20443,0.2  
0306,0.12946,0.12808,0.1287,0.12985,0.13779,0.14166,0.12937,0.11341,0.  
1296,0.13089,0.13194,0.10983,0.36352,0.3588,0.36667,0.36048,0.36819,0.  
36614,0.36498,0.27603,0.28054,0.29684,0.2812,0.26733,0.2914,0.28615,0.  
29467,0.27325,0.30738,0.28721,0.28517,0.20373,0.2035,0.20306,0.14236,0  
.12314,0.13839,0.12936,0.13017,0.12398,0.1214,0.12958,0.13823,0.13126,  
0.11777,0.12027,0.13696,0.12935,0.12994,0.36103,0.37093,0.37295,0.3619  
,0.36453,0.34706,0.3608,0.36384,0.36304,0.28295,0.29358,0.28131,0.2979  
5,0.2879,0.28626,0.27991,0.28364,0.29422,0.30978,0.28035,0.12891,0.126  
14,0.13319,0.12089,0.13014,0.12954,0.13331,0.13228,0.12116,0.10022,0.1  
355,0.11559,0.13201,0.13053,0.12948,0.13583,0.13512,0.12803,0.36472,0.

37009,0.36444,0.3543,0.36791,0.35105,0.36463,0.35291,0.36287,0.27831,0.  
.25401,0.21352,0.18634,0.20744,0.19957,0.20896,0.20988,0.20447,0.21126  
,0.2147,0.14314,0.13234,0.13089,0.12952,0.115,0.13067,0.12324,0.12679,  
0.1443,0.13001,0.12017,0.12982,0.11403,0.13464,0.13767,0.12973,0.13017  
,0.11459,0.35779,0.35545,0.35476,0.36429,0.3628,0.3651,0.36019,0.35989  
,0.36813,0.21839,0.21232,0.20732,0.21789,0.20751,0.20661,0.20339,0.191  
99,0.20478,0.21701,0.21188,0.13224,0.14168,0.13445,0.12984,0.12205,0.1  
2955,0.13693,0.13164,0.13209,0.12773,0.13791,0.10754,0.12967,0.13789,0  
.14214,0.13901,0.14547,0.12365,0.36042,0.36574,0.35382,0.37365,0.37034  
,0.37137,0.36376,0.20776,0.19633,0.1751,0.20469,0.19825,0.20649,0.2227  
1,0.21059,0.22077,0.22444,0.20792,0.20824,0.20366,0.13801,0.15137,0.11  
646,0.12902,0.13443,0.12978,0.12048,0.13344,0.13215,0.11144,0.13321,0.  
11754,0.11991,0.11114,0.1286,0.1312,0.15418,0.12974,0.36978,0.36891,0.  
34777,0.3642,0.36638,0.34835,0.21469,0.1644,0.22017,0.27735,0.20641,0.  
19754,0.19816,0.23214,0.20696,0.20524,0.23623,0.2062,0.21138,0.20948,0  
.13312,0.14168,0.11688,0.1293,0.1197,0.12538,0.12373,0.13512,0.12992,0  
.13074,0.12747,0.12967,0.1215,0.12767,0.13055,0.13408,0.12996,0.13023,  
0.36049,0.34901,0.37185,0.35164,0.36113,0.20529,0.19841,0.2126,0.21737  
,0.20963,0.20709,0.21175,0.20946,0.20697,0.20519,0.1998,0.21999,0.2178  
,0.20227,0.21061,0.11699,0.11156,0.12498,0.12968,0.13316,0.14243,0.135  
51,0.13055,0.13512,0.13302,0.1398,0.13844,0.13027,0.13019,0.12825,0.15  
039,0.12935,0.13029,0.36527,0.36015,0.35431,0.18596,0.22399,0.21241,0.  
19373,0.2195,0.2093,0.20719,0.20372,0.20712,0.19616,0.20501,0.20689,0.  
18515,0.20641,0.19334,0.1977,0.20623,0.12297,0.12935,0.12973,0.13942,0  
.12878,0.13866,0.11768,0.12169,0.13018,0.1297,0.14146,0.12977,0.11767,  
0.11493,0.13472,0.11634,0.13405,0.12918,0.3639,0.2091,0.20691,0.24687,  
0.24474,0.20149,0.20298,0.22485,0.20898,0.21234,0.22185,0.22759,0.2162  
,0.21065,0.21292,0.20107,0.20443,0.20755,0.20522,0.13355,0.13905,0.152  
16,0.13113,0.13295,0.13503,0.10178,0.13147,0.12942,0.13013,0.12983,0.1  
3001,0.15058,0.13988,0.14918,0.12967,0.13568,0.056534,0.21606,0.21001,  
0.23009,0.21108,0.18594,0.19406,0.21423,0.18882,0.20149,0.2439,0.20402  
,0.20523,0.21793,0.23034,0.20602,0.20509,0.2097,0.20603,0.20322,0.1382  
5,0.12399,0.13354,0.12649,0.13008,0.12988,0.13792,0.13683,0.087657,0.1  
3099,0.13059,0.13542,0.13138,0.13386,0.10699,0.11335,0.13085,0.05667,0  
.23076,0.23806,0.20958,0.18909,0.18392,0.20499,0.20933,0.2066,0.21387,  
0.20423,0.20336,0.20928,0.20128,0.20187,0.19929,0.20945,0.19054,0.2013  
,0.12938,0.10821,0.13017,0.13449,0.12981,0.11792,0.12931,0.12641,0.124  
53,0.12793,0.12938,0.12965,0.13117,0.13472,0.11847,0.13091,0.13616,0.1  
2292,0.0561,0.18395,0.22256,0.23784,0.20695,0.20818,0.21277,0.21611,0.  
21123,0.19149,0.20653,0.1996,0.20777,0.21109,0.21066,0.21097,0.20932,0  
.20885,0.2093,0.12412,0.13181,0.12939,0.11872,0.15992,0.12843,0.12961,  
0.12962,0.12843,0.13934,0.12725,0.13541,0.14117,0.11672,0.13236,0.1296  
9,0.12919,0.056904,0.056423,0.056444,0.15575,0.20768,0.19331,0.21423,0  
.1901,0.2119,0.20208,0.21872,0.2299,0.21471,0.19444,0.19872,0.19797,0.  
20351,0.20805,0.12547,0.14141,0.13342,0.12956,0.12982,0.14512,0.11802,  
0.12385,0.12965,0.1301,0.15406,0.13485,0.12005,0.12057,0.13041,0.14458  
,0.1278,0.1303,0.056342,0.056283,0.056843,0.056421,0.2108,0.18711,0.21  
353,0.20584,0.2086,0.21031,0.22075,0.20891,0.21036,0.21074,0.20823,0.1  
9745,0.12979,0.13323,0.13095,0.1171,0.13518,0.12959,0.12992,0.15626,0.  
13048,0.12955,0.12512,0.18144,0.11505,0.13432,0.12999,0.13097,0.12617,  
0.12994,0.10417,0.12944,0.056333,0.056684,0.05658,0.056967,0.056643,0.  
056496,0.1901,0.16891,0.22219,0.20852,0.20793,0.21138,0.22831,0.21216,



0.11844,0.11985,0.13234,0.14369,0.12424,0.13141,0.13066,0.12307,0.1414  
7,0.12872,0.11938,0.14412,0.13019,0.13606,0.13443,0.13003,0.12727,0.12  
97,0.12449,0.13851,0.13076,0.12764,0.13899,0.056862,0.056706,0.056852,  
0.056375,0.056164,0.056737,0.25113,0.20724,0.21374,0.23768,0.225,0.056  
748,0.05672,0.13104,0.12874,0.13964,0.12547,0.12963,0.11563,0.11888,0.  
12386,0.13245,0.1257,0.11747,0.12403,0.13723,0.133,0.12975,0.13647,0.1  
3491,0.14033,0.11142,0.12476,0.12954,0.056303,0.056681,0.056735,0.0561  
96,0.05656,0.057013,0.056854,0.057092,0.056577,0.05652,0.21163,0.2104,  
0.057108,0.056443,0.056907,0.056679,0.12956,0.13262,0.12721,0.12533,0.  
1081,0.14348,0.13566,0.12974,0.12965,0.12981,0.13014,0.12892,0.11188,0  
.12355,0.13633,0.12951,0.12989,0.14396,0.125,0.056352,0.05655,0.0564,0  
.056696,0.056335,0.056601,0.056653,0.056553,0.056801,0.056502,0.056533  
,0.056604,0.056354,0.056263,0.056473,0.056339,0.05683,0.12996,0.12637,  
0.15231,0.14272,0.12759,0.13043,0.12271,0.1484,0.14688,0.1234,0.13659,  
0.13055,0.12981,0.12961,0.13023,0.12965,0.056882,0.056548,0.05667,0.05  
7359,0.056743,0.05591,0.05598,0.057034,0.05691,0.057157,0.056482,0.056  
506,0.057227,0.056691,0.057114,0.056592,0.056902,0.057035,0.057004,0.1  
1196,0.12937,0.10364,0.13135,0.12941,0.12957,0.12858,0.11723,0.12992,0  
.12926,0.13655,0.12987,0.12069,0.056293,0.057045,0.05644,0.056475,0.05  
691,0.056662,0.056758,0.056618,0.056851,0.057288,0.056796,0.056526,0.0  
56408,0.056395,0.057035,0.056666,0.056591,0.056635,0.05684,0.057065,0.  
057115,0.13011,0.13049,0.13041,0.13456,0.1231,0.1427,0.13062,0.13885,0  
.13984,0.056656,0.056756,0.056854,0.056601,0.056809,0.057044,0.056179,  
0.056642,0.056111,0.05695,0.056393,0.056171,0.056932,0.05696,0.056877,  
0.056662,0.056499,0.056258,0.056534,0.056511,0.055921,0.056412,0.05676  
5,0.056819,0.056413,0.13962,0.13574,0.12245,0.12184,0.05645,0.056199,0  
.056888,0.057067,0.056698,0.056703,0.056697,0.056308,0.056359,0.056906  
,0.056264,0.056618,0.056734,0.056809,0.056388,0.057367,0.056095,0.0570  
75,0.056013,0.056614,0.057031,0.05679,0.05597,0.056997,0.056075,0.0567  
58,0.056725,0.056758,0.056555,0.05642,0.056092,0.056111,0.056627,0.056  
304,0.056748,0.056571,0.056425,0.056637,0.056602,0.05637,0.055946,0.05  
6604,0.056608,0.056829,0.056355,0.056759,0.056072,0.056248,0.057089,0.  
056867,0.056558,0.056342,0.056665,0.056564,0.056928,0.056605,0.056621,  
0.056396,0.056365,0.056336,0.056427,0.056603,0.05627,0.056251,0.056217  
,0.056441,0.056703,0.056833,0.05637,0.056762,0.057013,0.056507,0.05660  
7,0.056923,0.056885,0.056792,0.056574,0.056782,0.056613,0.056917,0.056  
402,0.057037,0.056942,0.056366,0.05696,0.056622,0.056524,0.056612,0.05  
6252,0.056687,0.056523,0.056744,0.056291,0.057278,0.05652,0.056314,0.0  
57066,0.057076,0.05675,0.056363,0.056748,0.057006,0.056989,0.056616,0.  
056463,0.056351,0.056908,0.055963,0.056739,0.056973,0.056456,0.056515,  
0.056488,0.05692,0.056327,0.056794,0.057099,0.056822,0.056229,0.055857  
,0.056461,0.057196,0.056558,0.056465,0.056677,0.056347,0.056942,0.0566  
04,0.057035,0.056221,0.056668,0.056622,0.057189,0.056688,0.056598,0.05  
6748,0.056573,0.056259,0.056739,0.05625,0.05713,0.056765,0.056342,0.05  
6695,0.056237,0.056858,0.056237,0.056306,0.056571,0.056673,0.056979,0.  
056697,0.057189,0.056793,0.056318,0.056674,0.055997,0.056379,0.05596,0  
.056393,0.0564,0.057119,0.056751,0.056404,0.057122,0.056931,0.056694,0  
.056803,0.056354,0.057068,0.056259,0.056499,0.056669,0.056993,0.056627  
,0.05595,0.056838,0.056817,0.056239,0.056631,0.056596,0.056771,0.05633  
8,0.056955,0.056441,0.057056,0.056962,0.056871,0.055863,0.056944,0.057  
058,0.056363,0.056488,0.056425,0.056104

0.20336,0.20435,0.2041,0.20381,0.20384,0.20357,0.20381,0.20392,0.20338  
,0.20475,0.20413,0.20409,0.20455,0.20352,0.20384,0.20423,0.2041,0.2048  
,0.20362,0.20338,0.27322,0.30177,0.28317,0.28008,0.20398,0.20506,0.204  
71,0.20427,0.20457,0.20424,0.20355,0.20357,0.20402,0.20416,0.20479,0.2  
0399,0.20318,0.20395,0.20399,0.35295,0.28494,0.29275,0.2825,0.27817,0.  
28839,0.28556,0.20447,0.20418,0.2031,0.20349,0.20442,0.20304,0.20454,0  
.20371,0.20447,0.20315,0.20345,0.20454,0.20433,0.20346,0.20331,0.35819  
,0.35697,0.2773,0.25604,0.28337,0.26189,0.2773,0.28229,0.28064,0.28069  
,0.20433,0.20378,0.20435,0.20423,0.20493,0.20362,0.20422,0.20371,0.204  
31,0.2036,0.20438,0.20428,0.20456,0.20355,0.20368,0.36225,0.35696,0.36  
694,0.28148,0.29697,0.26795,0.28196,0.28053,0.27902,0.28425,0.28636,0.  
28438,0.204,0.20473,0.20453,0.20393,0.20402,0.20428,0.20397,0.20519,0.  
20386,0.20384,0.20381,0.20411,0.20341,0.20441,0.20397,0.20371,0.36326,  
0.35998,0.35996,0.36116,0.29435,0.28467,0.27966,0.28771,0.27527,0.2642  
,0.29186,0.28611,0.26477,0.27081,0.20413,0.20301,0.2045,0.20453,0.2047  
,0.20335,0.20309,0.20356,0.20425,0.20542,0.20409,0.2043,0.20466,0.2039  
5,0.20363,0.20381,0.36761,0.36967,0.36477,0.36049,0.36438,0.35489,0.28  
313,0.28454,0.27826,0.2889,0.27775,0.29311,0.29895,0.28647,0.31154,0.2  
8057,0.20356,0.20453,0.20435,0.20363,0.2034,0.2043,0.20436,0.20507,0.2  
0374,0.20381,0.20362,0.20411,0.20413,0.20395,0.20413,0.2032,0.2042,0.3  
496,0.35419,0.35455,0.36125,0.35585,0.3601,0.28471,0.29007,0.28576,0.2  
8,0.28489,0.28603,0.27445,0.29262,0.29567,0.29451,0.29279,0.20483,0.20  
29,0.20337,0.20353,0.20419,0.20445,0.20542,0.2043,0.20403,0.20417,0.20  
456,0.2047,0.20415,0.12684,0.1368,0.13246,0.20536,0.35874,0.35324,0.36  
898,0.36509,0.35775,0.37141,0.362,0.27918,0.27813,0.29116,0.2848,0.267  
36,0.26642,0.28193,0.27191,0.27064,0.26602,0.29499,0.20374,0.20386,0.2  
0379,0.20431,0.20302,0.20419,0.20417,0.20343,0.20578,0.20383,0.20363,0  
.13074,0.10583,0.12608,0.12946,0.12859,0.11695,0.20317,0.35579,0.37545  
,0.3683,0.36103,0.35851,0.35719,0.36438,0.29133,0.28259,0.2832,0.28891  
,0.26485,0.30357,0.29183,0.28498,0.28391,0.28,0.29685,0.20437,0.20448,  
0.20483,0.20538,0.20393,0.20385,0.20395,0.20368,0.20363,0.12948,0.1295  
1,0.13261,0.12945,0.12924,0.1293,0.13071,0.12748,0.13605,0.20374,0.365  
72,0.36443,0.34582,0.35243,0.35909,0.35919,0.36122,0.29285,0.2782,0.28  
435,0.28093,0.29868,0.30226,0.28286,0.29031,0.28329,0.29735,0.28149,0.  
2613,0.20469,0.20395,0.20399,0.20333,0.20507,0.20417,0.12924,0.12753,0  
.12827,0.12938,0.13734,0.14101,0.12907,0.11248,0.12904,0.13055,0.13155  
,0.10897,0.36101,0.35484,0.36226,0.35229,0.36074,0.36621,0.36162,0.274  
87,0.27795,0.29487,0.27912,0.26783,0.28893,0.28314,0.29405,0.27221,0.3  
0716,0.28677,0.28422,0.20464,0.2041,0.2034,0.14205,0.12273,0.13793,0.1  
2919,0.12989,0.12335,0.12121,0.12923,0.13809,0.13091,0.11686,0.11986,0  
.13639,0.12911,0.12938,0.35553,0.36459,0.36769,0.35988,0.36466,0.3493,  
0.36207,0.36081,0.35756,0.28193,0.29474,0.28166,0.29646,0.28675,0.2842  
1,0.27872,0.28192,0.29045,0.30761,0.27986,0.12875,0.12559,0.13289,0.12  
04,0.12964,0.12887,0.13281,0.13207,0.12061,0.099233,0.13539,0.11498,0.  
13167,0.12993,0.12912,0.1357,0.13475,0.12756,0.36172,0.36609,0.35814,0  
.35367,0.36541,0.35105,0.3657,0.35227,0.35566,0.2782,0.25355,0.21161,0  
.18579,0.20555,0.19842,0.20742,0.20757,0.20363,0.2082,0.21289,0.14302,  
0.13201,0.13048,0.1293,0.11436,0.13,0.12296,0.12617,0.14404,0.12947,0.  
1194,0.12949,0.11327,0.13415,0.13734,0.1293,0.12956,0.11403,0.35408,0.  
35406,0.35226,0.36165,0.3646,0.36049,0.35815,0.3566,0.36409,0.21497,0.  
21208,0.20641,0.21684,0.20661,0.20606,0.20195,0.19254,0.20559,0.21572,  
0.21098,0.1318,0.14143,0.13408,0.12941,0.12131,0.12905,0.13667,0.13136

,0.1316,0.12715,0.13741,0.1068,0.1293,0.13752,0.14217,0.13878,0.14519,  
0.12319,0.35863,0.36471,0.34863,0.37113,0.36479,0.36765,0.35837,0.2048  
,0.19324,0.1729,0.20381,0.19687,0.20352,0.21976,0.20867,0.21954,0.224,  
0.20489,0.20714,0.20314,0.1375,0.15111,0.11574,0.12859,0.13426,0.1293,  
0.11981,0.13293,0.13185,0.11065,0.13293,0.11688,0.11928,0.11055,0.1280  
1,0.13083,0.15433,0.12968,0.36779,0.3654,0.34866,0.36086,0.3632,0.3499  
6,0.21109,0.16301,0.21913,0.27354,0.20437,0.19666,0.19767,0.23071,0.20  
609,0.20395,0.23569,0.20437,0.20914,0.20877,0.13284,0.14125,0.11637,0.  
12861,0.11941,0.12503,0.12283,0.13482,0.12965,0.13018,0.12699,0.12892,  
0.12096,0.12701,0.13017,0.13373,0.12966,0.12979,0.35833,0.35431,0.3684  
6,0.34971,0.35906,0.20331,0.1969,0.21089,0.21488,0.20903,0.20541,0.210  
13,0.20781,0.20563,0.20524,0.19932,0.21791,0.21717,0.20073,0.20683,0.1  
1639,0.11045,0.12442,0.12958,0.13264,0.1425,0.13539,0.13004,0.13484,0.  
13269,0.13933,0.13837,0.12981,0.12971,0.12761,0.15031,0.12884,0.12965,  
0.36353,0.35381,0.35301,0.18385,0.22033,0.20811,0.19167,0.21698,0.2066  
1,0.20457,0.20034,0.20479,0.19543,0.20332,0.20658,0.18448,0.2042,0.191  
82,0.19613,0.20635,0.12244,0.12897,0.12945,0.13913,0.1286,0.13825,0.11  
7,0.12113,0.12967,0.12934,0.14145,0.12956,0.11718,0.11418,0.13444,0.11  
563,0.13388,0.12845,0.35747,0.20895,0.20663,0.24444,0.24273,0.19954,0.  
19921,0.2232,0.20435,0.20983,0.22119,0.22612,0.21446,0.21031,0.211,0.2  
0041,0.20167,0.20615,0.20457,0.13308,0.13876,0.15186,0.13079,0.13256,0.  
.13457,0.10059,0.13119,0.12884,0.1296,0.12934,0.12963,0.15062,0.13952,  
0.14916,0.12921,0.13561,0.054755,0.21476,0.20957,0.22735,0.20838,0.183  
65,0.19039,0.21237,0.18809,0.19998,0.23935,0.20385,0.20244,0.21786,0.2  
2823,0.20512,0.20425,0.20875,0.2047,0.20156,0.13825,0.12342,0.13321,0.  
1258,0.12946,0.1293,0.13774,0.13651,0.08642,0.13051,0.13024,0.13526,0.  
13093,0.13333,0.10634,0.1126,0.13057,0.054859,0.22949,0.23613,0.20693,  
0.18698,0.18126,0.20242,0.20759,0.20759,0.21178,0.20122,0.20337,0.2069  
3,0.19975,0.19852,0.19887,0.20822,0.18892,0.20008,0.12895,0.10725,0.12  
966,0.13399,0.12952,0.11695,0.12881,0.12598,0.12427,0.12747,0.12932,0.  
12925,0.13058,0.13432,0.11766,0.13036,0.1357,0.12237,0.054369,0.18099,  
0.22099,0.23699,0.20461,0.20656,0.2105,0.21461,0.21143,0.18894,0.20416  
,0.19859,0.20825,0.21131,0.20897,0.21005,0.20861,0.20682,0.20831,0.123  
5,0.13161,0.12888,0.11779,0.16009,0.12788,0.12945,0.1292,0.1279,0.1393  
,0.12678,0.13523,0.14094,0.11612,0.13185,0.12931,0.12875,0.055157,0.05  
461,0.054697,0.15276,0.20584,0.19184,0.21116,0.18641,0.21159,0.19936,0.  
.21676,0.22508,0.2149,0.19323,0.19757,0.19715,0.20119,0.20768,0.12495,  
0.14121,0.13307,0.12916,0.12916,0.14493,0.11734,0.1234,0.12931,0.12976  
,0.154,0.13464,0.11951,0.11971,0.12996,0.14449,0.12743,0.12974,0.05453  
9,0.054467,0.055276,0.054481,0.20636,0.1834,0.21179,0.20366,0.20718,0.  
21002,0.21794,0.20657,0.20648,0.20945,0.2064,0.19595,0.12927,0.13273,0.  
.13058,0.11653,0.13473,0.12922,0.12936,0.15639,0.12986,0.12893,0.1245,  
0.18193,0.11435,0.13384,0.12958,0.13088,0.1256,0.1295,0.10335,0.12898,  
0.054559,0.055023,0.055,0.055261,0.05509,0.054867,0.18635,0.16628,0.22  
047,0.20707,0.2041,0.20958,0.22491,0.20824,0.11796,0.11922,0.13209,0.1  
4322,0.12358,0.1311,0.13038,0.12269,0.14135,0.1282,0.11868,0.14404,0.1  
2966,0.13567,0.13391,0.12951,0.12651,0.12927,0.12417,0.13821,0.13029,0.  
.12713,0.13865,0.05519,0.054822,0.055068,0.054742,0.054383,0.054855,0.  
2492,0.20428,0.21052,0.23411,0.22297,0.055044,0.054793,0.13052,0.12842  
,0.13914,0.12521,0.12938,0.11513,0.11825,0.12338,0.13208,0.12525,0.116  
82,0.12338,0.13672,0.13228,0.12912,0.13611,0.13422,0.1402,0.1106,0.124  
13,0.12919,0.05465,0.054966,0.054958,0.054325,0.054914,0.055403,0.0551

25,0.055198,0.054754,0.054883,0.20925,0.20585,0.055253,0.054744,0.0551  
63,0.055069,0.12944,0.13246,0.12668,0.12518,0.10735,0.14329,0.13518,0.  
12933,0.1292,0.12952,0.12977,0.12841,0.11128,0.1231,0.13618,0.12902,0.  
12959,0.14379,0.12446,0.054502,0.054879,0.054627,0.054979,0.054538,0.0  
54662,0.054815,0.054878,0.054835,0.054534,0.054601,0.054846,0.054667,0  
.054483,0.054871,0.054692,0.055098,0.12937,0.12595,0.15227,0.14256,0.1  
2736,0.13026,0.12219,0.14808,0.1466,0.12298,0.13612,0.1302,0.12963,0.1  
2883,0.12979,0.12895,0.055218,0.054876,0.055109,0.055504,0.055175,0.05  
4183,0.054281,0.055359,0.055192,0.055191,0.054615,0.054874,0.05537,0.0  
54902,0.05528,0.054974,0.055054,0.055377,0.055174,0.11101,0.12877,0.10  
26,0.13124,0.12921,0.12906,0.12798,0.11661,0.12966,0.129,0.13633,0.129  
14,0.11996,0.05461,0.055242,0.054521,0.054796,0.055188,0.05498,0.05513  
8,0.055066,0.055292,0.055518,0.054824,0.054826,0.054827,0.054707,0.055  
335,0.05476,0.05491,0.05482,0.055259,0.055389,0.055461,0.12957,0.12995  
,0.13004,0.13426,0.12245,0.14246,0.13014,0.13857,0.1395,0.055065,0.054  
962,0.055107,0.055004,0.055106,0.055237,0.054627,0.054823,0.054293,0.0  
55236,0.05465,0.054636,0.055371,0.054997,0.055227,0.054962,0.054713,0.  
054744,0.05491,0.054915,0.053985,0.054745,0.054976,0.054967,0.054783,0  
.1394,0.13562,0.12189,0.12118,0.054926,0.054428,0.055158,0.055511,0.05  
4829,0.055106,0.055041,0.054624,0.054788,0.055064,0.054723,0.055031,0.  
05491,0.05511,0.054843,0.055746,0.054621,0.055409,0.054357,0.054797,0.  
055372,0.055246,0.054276,0.055398,0.054454,0.055135,0.055113,0.055024,  
0.054993,0.05461,0.054288,0.054513,0.054936,0.0544,0.054966,0.054931,0  
.054786,0.05503,0.05466,0.054423,0.054277,0.0549,0.05491,0.054861,0.05  
4481,0.054907,0.05432,0.054613,0.055495,0.055318,0.055047,0.054532,0.0  
54795,0.054874,0.054986,0.054787,0.055035,0.054745,0.054672,0.054789,0  
.054758,0.054599,0.054503,0.054619,0.054275,0.05468,0.054756,0.055086,  
0.054601,0.055057,0.055282,0.054752,0.054617,0.055276,0.055179,0.05481  
6,0.054801,0.054955,0.054926,0.055234,0.054724,0.055068,0.055263,0.054  
546,0.05539,0.054797,0.054805,0.055023,0.054514,0.055025,0.054875,0.05  
5026,0.054477,0.055387,0.054629,0.05446,0.05542,0.055329,0.054906,0.05  
4656,0.054932,0.055007,0.055201,0.054933,0.05475,0.054632,0.055321,0.0  
54208,0.054882,0.055089,0.054631,0.054684,0.054631,0.055109,0.054353,0  
.055214,0.055333,0.055022,0.054412,0.05404,0.054609,0.055384,0.05489,0  
.054864,0.054966,0.054712,0.055284,0.054949,0.055143,0.054339,0.055019  
,0.05512,0.055378,0.054682,0.055156,0.055107,0.054919,0.054405,0.05508  
5,0.054326,0.055516,0.055023,0.054869,0.055055,0.054593,0.055139,0.054  
536,0.054547,0.054883,0.055071,0.05525,0.054901,0.055354,0.055039,0.05  
4687,0.055068,0.054198,0.054757,0.054285,0.054652,0.054676,0.05536,0.0  
54935,0.054531,0.055308,0.055016,0.054871,0.055163,0.054634,0.055254,0  
.054508,0.05505,0.05475,0.055076,0.054848,0.054151,0.055229,0.055183,0  
.054439,0.054739,0.054978,0.054875,0.054736,0.0553,0.054652,0.055227,0  
.055147,0.055152,0.054066,0.055069,0.055198,0.054686,0.054773,0.054533  
,0.054419  
0.20381,0.20529,0.20485,0.20454,0.2044,0.20443,0.20502,0.20478,0.20416  
,0.20533,0.20523,0.20498,0.20456,0.20392,0.20434,0.20476,0.20448,0.205  
57,0.20438,0.20437,0.27108,0.29856,0.28243,0.27973,0.2051,0.20578,0.20  
535,0.20518,0.20551,0.205,0.20431,0.20442,0.2047,0.20523,0.20575,0.205  
01,0.20425,0.20457,0.20458,0.35132,0.28323,0.29219,0.2815,0.27533,0.28  
97,0.28621,0.20495,0.20488,0.20421,0.20425,0.20519,0.2043,0.20528,0.20  
487,0.205,0.20399,0.20447,0.2052,0.20512,0.20467,0.20399,0.36058,0.355  
65,0.27789,0.25574,0.28087,0.26289,0.27653,0.28009,0.28015,0.28118,0.2

0508,0.20473,0.20493,0.20447,0.20546,0.20413,0.2052,0.2047,0.20483,0.2  
0477,0.2057,0.20525,0.20502,0.2048,0.20437,0.36094,0.35479,0.36424,0.2  
8089,0.29768,0.26834,0.27997,0.27984,0.27747,0.28312,0.28697,0.28267,0  
.20512,0.20531,0.20523,0.20482,0.20473,0.20507,0.20483,0.20597,0.20498  
,0.20492,0.20483,0.20495,0.20407,0.20548,0.20469,0.20442,0.35973,0.354  
85,0.35624,0.3578,0.29204,0.28317,0.27805,0.28692,0.27411,0.26313,0.29  
086,0.28607,0.26432,0.27057,0.20465,0.20388,0.20546,0.20514,0.20544,0.  
20441,0.20448,0.2041,0.20472,0.20608,0.20505,0.20509,0.20547,0.20439,0  
.20428,0.20424,0.36263,0.36259,0.35389,0.35736,0.36604,0.35212,0.28062  
,0.28319,0.27563,0.28742,0.27966,0.2911,0.29727,0.28428,0.30804,0.2805  
6,0.20451,0.2056,0.20513,0.20403,0.20443,0.20507,0.20473,0.20558,0.205  
09,0.20448,0.20455,0.20505,0.20547,0.20451,0.20488,0.20373,0.20518,0.3  
4579,0.35005,0.35386,0.35873,0.35621,0.35934,0.28279,0.29056,0.28344,0  
.27818,0.2841,0.28523,0.27347,0.28982,0.2947,0.29149,0.29326,0.20563,0  
.20379,0.20447,0.20453,0.20498,0.20519,0.2068,0.20532,0.20489,0.20435,  
0.20517,0.20555,0.20491,0.12651,0.1367,0.13217,0.20621,0.35208,0.35106  
,0.3652,0.36415,0.35442,0.36986,0.36371,0.27702,0.27885,0.28796,0.2839  
6,0.26826,0.26565,0.28109,0.27015,0.26891,0.26692,0.29439,0.20481,0.20  
46,0.20486,0.20484,0.2042,0.20416,0.20517,0.20389,0.20637,0.20456,0.20  
436,0.13025,0.10503,0.12567,0.12932,0.12838,0.11652,0.20399,0.35329,0.  
37406,0.36657,0.3567,0.35473,0.35581,0.36146,0.29048,0.28081,0.28177,0  
.286,0.26306,0.30313,0.28906,0.28657,0.2837,0.27706,0.29761,0.20515,0.  
20495,0.20535,0.20647,0.20459,0.20445,0.20487,0.20443,0.20442,0.12924,  
0.12925,0.13243,0.12916,0.12885,0.12926,0.13034,0.12721,0.13566,0.2042  
4,0.36302,0.35912,0.3458,0.35201,0.35598,0.35434,0.36237,0.2898,0.2775  
2,0.28299,0.27934,0.29637,0.29937,0.28176,0.28935,0.28339,0.29449,0.28  
135,0.26153,0.20551,0.2048,0.20501,0.20443,0.2057,0.20474,0.129,0.127,  
0.12786,0.12879,0.13716,0.14093,0.12892,0.11184,0.12889,0.13013,0.1313  
,0.10812,0.35459,0.35152,0.36101,0.34768,0.35908,0.36155,0.35912,0.272  
86,0.27541,0.29349,0.27603,0.26654,0.28658,0.28306,0.29286,0.27221,0.3  
0707,0.28423,0.2862,0.20507,0.20493,0.20407,0.142,0.12224,0.13769,0.12  
865,0.12963,0.1231,0.12056,0.12909,0.13779,0.13075,0.11624,0.11904,0.1  
3596,0.1287,0.12923,0.356,0.35994,0.36278,0.35853,0.36113,0.34674,0.36  
425,0.3584,0.35361,0.28116,0.29447,0.28105,0.29757,0.28381,0.28459,0.2  
7667,0.28079,0.28811,0.30918,0.27941,0.12858,0.1253,0.13217,0.1202,0.1  
2928,0.12861,0.13244,0.13177,0.12027,0.098768,0.13524,0.11446,0.13142,  
0.1298,0.12859,0.13546,0.13429,0.12728,0.35787,0.36605,0.35454,0.35117  
,0.36597,0.35074,0.36027,0.34882,0.35566,0.27826,0.25294,0.21078,0.185  
26,0.20435,0.19703,0.20757,0.20572,0.20166,0.20587,0.21218,0.14276,0.1  
3156,0.12998,0.12929,0.11374,0.12947,0.1227,0.12563,0.14413,0.12915,0.  
11897,0.12923,0.11296,0.13375,0.13708,0.12886,0.1293,0.11363,0.3546,0.  
35258,0.34986,0.3581,0.3646,0.35948,0.3533,0.35186,0.35947,0.21355,0.2  
1241,0.20532,0.21509,0.20512,0.20483,0.20164,0.19186,0.20541,0.21497,0  
.21033,0.13135,0.14111,0.13367,0.12904,0.12086,0.12862,0.13622,0.13114  
,0.13138,0.12687,0.13709,0.1061,0.12888,0.13735,0.14189,0.13867,0.1451  
8,0.12263,0.35766,0.36439,0.34775,0.36691,0.36248,0.36379,0.35319,0.20  
465,0.19113,0.17252,0.20252,0.19625,0.20206,0.2184,0.20889,0.21965,0.2  
2201,0.20329,0.20646,0.20324,0.13723,0.15128,0.11521,0.12854,0.13386,0  
.12892,0.11941,0.13283,0.13133,0.11015,0.13265,0.11616,0.11883,0.10993  
,0.1274,0.13063,0.15404,0.1292,0.36337,0.35408,0.34228,0.35696,0.36252  
,0.34656,0.20942,0.16207,0.21587,0.27046,0.20176,0.19614,0.19662,0.228  
77,0.20464,0.20356,0.23421,0.20261,0.20728,0.20906,0.1324,0.14091,0.11

613,0.12829,0.11877,0.12491,0.12248,0.13483,0.12934,0.12999,0.12653,0.12873,0.1206,0.12682,0.12984,0.13348,0.12935,0.12946,0.35156,0.34951,0.36488,0.3454,0.35744,0.20222,0.19416,0.20909,0.21314,0.20631,0.20128,0.20906,0.20568,0.20316,0.20476,0.1978,0.21749,0.21728,0.19961,0.20626,0.11577,0.11004,0.12404,0.12954,0.13215,0.14214,0.13522,0.12996,0.13482,0.13249,0.13908,0.13821,0.12926,0.12941,0.12706,0.15015,0.12863,0.12925,0.35805,0.35536,0.35378,0.18179,0.22096,0.20619,0.18662,0.2162,0.20686,0.20387,0.19851,0.20307,0.19375,0.20161,0.20618,0.18369,0.20358,0.19138,0.19695,0.20423,0.1221,0.12887,0.12929,0.13894,0.12827,0.13764,0.11654,0.12051,0.12946,0.12901,0.14134,0.12919,0.11654,0.11349,0.13404,0.11518,0.13345,0.12804,0.35509,0.20704,0.20362,0.24298,0.24076,0.19662,0.19653,0.2196,0.2014,0.20611,0.22028,0.22411,0.21273,0.20886,0.21016,0.19965,0.20129,0.20318,0.20303,0.1329,0.13851,0.15207,0.13043,0.13244,0.13422,0.099683,0.13094,0.12852,0.12924,0.12902,0.12927,0.1505,0.13924,0.14922,0.1291,0.13523,0.053391,0.21166,0.20694,0.22302,0.20548,0.18187,0.18928,0.20942,0.18559,0.19909,0.23565,0.20242,0.20131,0.21699,0.22538,0.20311,0.20386,0.20857,0.20293,0.20124,0.13813,0.12295,0.13299,0.12535,0.12921,0.12912,0.13769,0.1363,0.085342,0.13,0.12983,0.13516,0.13046,0.13319,0.10567,0.11208,0.13051,0.053294,0.22775,0.23423,0.20579,0.18389,0.18031,0.19925,0.20743,0.20486,0.20721,0.19925,0.20183,0.20608,0.19856,0.19718,0.19798,0.20713,0.18871,0.19787,0.12901,0.10661,0.12919,0.13361,0.12915,0.11645,0.12873,0.1257,0.12361,0.12724,0.12903,0.12871,0.13018,0.13411,0.11725,0.13022,0.13556,0.12167,0.052761,0.1786,0.21811,0.23376,0.20323,0.20567,0.20668,0.21259,0.2089,0.18833,0.2028,0.19752,0.20687,0.21021,0.20828,0.20962,0.20777,0.20621,0.20749,0.12294,0.13126,0.12861,0.11705,0.16006,0.12743,0.12907,0.12878,0.12744,0.1392,0.12665,0.13509,0.1408,0.11576,0.13166,0.12908,0.12849,0.053745,0.053271,0.053478,0.15188,0.20364,0.19003,0.20926,0.18354,0.21061,0.19787,0.21463,0.22295,0.21481,0.19136,0.19554,0.19591,0.19969,0.20546,0.12453,0.14135,0.1327,0.12904,0.12876,0.14484,0.11688,0.12286,0.12908,0.12908,0.15401,0.13436,0.11883,0.11906,0.12974,0.14461,0.127,0.12934,0.053146,0.053038,0.053695,0.053389,0.2042,0.1828,0.21014,0.20277,0.20627,0.21003,0.21512,0.20595,0.20355,0.20838,0.20591,0.19476,0.12898,0.13244,0.13032,0.11602,0.13466,0.12874,0.12925,0.15615,0.12968,0.12845,0.12425,0.1826,0.11372,0.13334,0.12918,0.13054,0.12536,0.1289,0.10257,0.12864,0.053266,0.053559,0.053469,0.053921,0.053636,0.053403,0.18542,0.16357,0.21926,0.2056,0.20319,0.20953,0.22278,0.20789,0.1171,0.11861,0.13183,0.14323,0.12304,0.13087,0.13023,0.12239,0.14112,0.12823,0.11812,0.14398,0.1293,0.13548,0.13369,0.12886,0.12616,0.12899,0.12362,0.13815,0.1299,0.12675,0.13858,0.053742,0.053493,0.053715,0.053271,0.052859,0.053334,0.24786,0.20152,0.20893,0.23058,0.22315,0.053676,0.053567,0.13028,0.12803,0.13901,0.12474,0.12914,0.11466,0.11763,0.12284,0.13173,0.12469,0.11624,0.12304,0.13652,0.13183,0.12911,0.13587,0.13413,0.13999,0.10987,0.12371,0.12908,0.05335,0.053502,0.053402,0.052981,0.053471,0.054102,0.05364,0.053756,0.053455,0.053423,0.20714,0.20552,0.053658,0.053379,0.053553,0.053505,0.12926,0.13208,0.1265,0.12473,0.10692,0.14309,0.13485,0.12907,0.12891,0.12918,0.12931,0.12791,0.11072,0.12271,0.13591,0.12865,0.12918,0.14373,0.12424,0.053299,0.053502,0.053149,0.053617,0.053211,0.053402,0.05332,0.053315,0.053431,0.053268,0.053364,0.053424,0.053175,0.053214,0.053756,0.053189,0.053602,0.12877,0.12571,0.15214,0.14252,0.12693,0.13027,0.12157,0.14801,0.14628,0.12265,0.13601,0.13012,0.12917,0.12832,0.12951,0.12888,0.053762,0.05334,0.053828,0.05

4029,0.053708,0.052721,0.053032,0.05372,0.053886,0.053658,0.052867,0.053425,0.054031,0.053235,0.053913,0.053589,0.053726,0.053784,0.053902,0.11012,0.12875,0.10189,0.13073,0.12886,0.12851,0.12755,0.11589,0.1292,0.12908,0.13587,0.12869,0.11946,0.053405,0.053825,0.052926,0.053244,0.053479,0.053332,0.053582,0.053715,0.053752,0.053909,0.053526,0.053526,0.05355,0.053476,0.053866,0.053198,0.053416,0.053311,0.053706,0.053779,0.053732,0.12903,0.12965,0.12979,0.13396,0.12188,0.14228,0.12958,0.13845,0.13923,0.053646,0.05358,0.053693,0.053511,0.053509,0.054108,0.053303,0.053386,0.052936,0.05387,0.053415,0.053542,0.053877,0.053334,0.053698,0.053359,0.053297,0.053356,0.053507,0.053693,0.052637,0.053507,0.053577,0.053594,0.05338,0.13928,0.13539,0.12154,0.1209,0.053674,0.052917,0.05388,0.054014,0.053418,0.053923,0.053603,0.053246,0.053431,0.053749,0.053343,0.053537,0.05374,0.053621,0.053581,0.054108,0.05319,0.054106,0.052879,0.053178,0.054202,0.053559,0.053023,0.054061,0.053054,0.053799,0.05368,0.053603,0.053493,0.053236,0.052925,0.053153,0.053429,0.052845,0.053476,0.053509,0.053464,0.053559,0.053129,0.053054,0.052912,0.053341,0.053327,0.053548,0.05312,0.053587,0.052957,0.053004,0.054061,0.053983,0.053607,0.052846,0.053474,0.053458,0.05366,0.053402,0.0536,0.053285,0.053313,0.053347,0.053304,0.053247,0.053031,0.053462,0.052812,0.053055,0.053665,0.053696,0.053205,0.053803,0.053772,0.053405,0.053327,0.054051,0.05368,0.053236,0.053274,0.053767,0.053402,0.054063,0.053296,0.053401,0.053437,0.053288,0.053726,0.053498,0.053492,0.053729,0.053178,0.053452,0.053477,0.053239,0.053428,0.053787,0.053347,0.053111,0.053774,0.05386,0.053332,0.053391,0.053549,0.053518,0.053754,0.053492,0.053161,0.053255,0.054144,0.052763,0.053527,0.053658,0.053181,0.05331,0.05312,0.053864,0.052937,0.053888,0.053756,0.05362,0.052992,0.052579,0.053214,0.053918,0.053264,0.053525,0.053451,0.053155,0.053745,0.053518,0.053754,0.052869,0.053453,0.053514,0.053883,0.053122,0.053773,0.053689,0.053512,0.052951,0.053715,0.052764,0.053818,0.053522,0.053541,0.053626,0.053098,0.053563,0.053099,0.053359,0.053301,0.053787,0.053656,0.053331,0.054058,0.053641,0.053223,0.053436,0.052796,0.053345,0.053002,0.053332,0.053437,0.053978,0.053448,0.053358,0.053596,0.053776,0.053563,0.053598,0.053278,0.053734,0.053099,0.053828,0.053392,0.053677,0.053591,0.052873,0.053791,0.053761,0.053018,0.053346,0.053483,0.053431,0.05346,0.053739,0.053244,0.053624,0.053845,0.05391,0.052799,0.05377,0.05373,0.053413,0.053249,0.053164,0.053016

#simdataS2SNR10:

Kep\_f=1.2

Kep\_f=1.2

Kep\_s=0.1

Ktrans\_f=0.05

Ktrans\_s=0.03

del\_t=0.5

gtSf=0

|   |   |   |   |   |   |   |   |
|---|---|---|---|---|---|---|---|
| 0 | 0 | 0 | 0 | 0 | 0 | 0 | 0 |
| 0 | 0 | 0 | 0 | 0 | 0 | 0 | 0 |
| 0 | 0 | 0 | 0 | 0 | 0 | 0 | 0 |
| 0 | 0 | 0 | 0 | 0 | 0 | 0 | 0 |
| 0 | 0 | 0 | 0 | 0 | 0 | 0 | 0 |





|         |         |         |         |         |         |
|---------|---------|---------|---------|---------|---------|
| 0.51735 | 0.56124 | 0.36458 | 0.34977 | 0.60809 | 0.5     |
| 0.45641 | 0.52548 | 0.50356 | 0.32237 | 0       | 0       |
| 0       | 0       | 0       | 0       | 0       | 0       |
| 0       | 0       | 0       | 0       | 0       | 0       |
| 0       | 0       | 0       | 0       | 0       | 0       |
| 0.55319 | 0.57323 | 0.39421 | 0.60372 | 0.44338 | 0.40867 |
| 0.46995 | 0.5     | 0.5     | 0.4953  | 0.50638 | 0.47214 |
| 0.53703 | 0.49064 | 0.5     | 0.4385  | 0.57015 | 0.65463 |
| 0       | 0       | 0       | 0       | 0       | 0       |
| 0       | 0       | 0       | 0       | 0       | 0.29885 |
| 0.33333 | 0.33333 | 0.37346 | 0.33333 | 0.33333 | 0.4113  |
| 0.37962 | 0.32845 | 0.50295 | 0.65898 | 0.5     | 0.57887 |
| 0.48211 | 0.45957 | 0.50711 | 0.5     | 0.42856 | 0.52176 |
| 0.47387 | 0.61593 | 0.5521  | 0.5     | 0.51382 | 0.50613 |
| 0.5     | 0.4732  | 0       | 0       | 0       | 0       |
| 0       | 0       | 0       | 0       | 0       | 0.5     |
| 0.33333 | 0.34641 | 0.31335 | 0.33679 | 0.33078 | 0.36239 |
| 0.33333 | 0.26111 | 0.29701 | 0.33117 | 0.4902  | 0.56579 |
| 0.5     | 0.5     | 0.5778  | 0.50579 | 0.5     | 0.48379 |
| 0.55932 | 0.56748 | 0.55153 | 0.5     | 0.57006 | 0.6572  |
| 0.49108 | 0.5     | 0.62159 | 0.55882 | 0       | 0       |
| 0       | 0       | 0       | 0       | 0       | 0.5     |
| 0.47983 | 0.5     | 0.37143 | 0.27875 | 0.33892 | 0.34393 |
| 0.33333 | 0.33718 | 0.32399 | 0.3714  | 0.3565  | 0.33333 |
| 0.50072 | 0.50559 | 0.48237 | 0.57375 | 0.49524 | 0.47695 |
| 0.5     | 0.51865 | 0.52027 | 0.56117 | 0.50242 | 0.5     |
| 0.5     | 0.46403 | 0.49451 | 0.4484  | 0.46985 | 0.46359 |
| 0       | 0       | 0       | 0       | 0       | 0       |
| 0.48359 | 0.5     | 0.5     | 0.48814 | 0.48388 | 0.37028 |
| 0.29854 | 0.30911 | 0.31688 | 0.29846 | 0.23201 | 0.35088 |
| 0.3773  | 0.37421 | 0.43934 | 0.59955 | 0.56057 | 0.4964  |
| 0.47256 | 0.53816 | 0.5     | 0.5     | 0.54382 | 0.47829 |
| 0.5103  | 0.40092 | 0.5     | 0.37852 | 0.49696 | 0.53406 |
| 0.52738 | 0.44727 | 0       | 0       | 0       | 0       |
| 0       | 0.46951 | 0.46252 | 0.51922 | 0.5387  | 0.5     |
| 0.5     | 0.33879 | 0.3193  | 0.33333 | 0.38245 | 0.37769 |
| 0.3056  | 0.38699 | 0.33306 | 0.30576 | 0.46914 | 0.3817  |
| 0.5     | 0.5     | 0.45621 | 0.50192 | 0.5     | 0.58985 |
| 0.5     | 0.52221 | 0.5     | 0.41588 | 0.56489 | 0.45051 |
| 0.39597 | 0.50116 | 0.5     | 0.60506 | 0       | 0       |
| 0       | 0.46055 | 0.5083  | 0.57875 | 0.5     | 0.51104 |
| 0.46564 | 0.59449 | 0.45016 | 0.35741 | 0.36102 | 0.32181 |
| 0.35346 | 0.29176 | 0.32509 | 0.26418 | 0.38926 | 0.34484 |
| 0.56216 | 0.56623 | 0.42121 | 0.61252 | 0.45594 | 0.61907 |
| 0.5     | 0.5     | 0.6578  | 0.5     | 0.4081  | 0.5     |
| 0.5     | 0.5     | 0.5     | 0.51944 | 0.5     | 0.5     |
| 0       | 0.5     | 0.5246  | 0.58769 | 0.5     | 0.5     |
| 0.50753 | 0.6022  | 0.52153 | 0.5     | 0.33496 | 0.30401 |
| 0.32451 | 0.39694 | 0.3258  | 0.29246 | 0.36064 | 0.3642  |
| 0.33472 | 0.44062 | 0.50142 | 0.50702 | 0.5     | 0.49457 |
| 0.63548 | 0.50575 | 0.5     | 0.54678 | 0.55056 | 0.52148 |
| 0.48933 | 0.59137 | 0.5     | 0.51251 | 0.5     | 0.52368 |

|         |         |         |         |         |         |         |
|---------|---------|---------|---------|---------|---------|---------|
| 1       | 0.51071 | 0.42041 | 0.41941 | 0.5484  | 0.42841 |         |
| 0.47943 |         | 0.5     | 0.49659 | 0.5     | 0.49792 | 0.32573 |
| 0.27728 | 0.31384 |         | 0.33333 | 0.40421 | 0.33333 | 0.33333 |
| 0.33333 | 0.32435 |         | 0.48626 | 0.49151 | 0.46002 | 0.5     |
| 0.60185 | 0.46735 |         | 0.51721 | 0.5556  | 0.49856 | 0.5     |
| 0.48016 |         | 0.5     | 0.4952  | 0.49675 | 0.48556 | 0.51357 |
| 0.5     | 1       |         | 0.5     | 0.43546 | 0.44426 | 0.5     |
| 0.45113 | 0.46201 |         | 0.53916 | 0.5     | 0.58374 | 0.52789 |
| 0.2516  | 0.34597 |         | 0.3455  | 0.31005 | 0.34964 | 0.34256 |
| 0.33333 | 0.29902 |         | 0.31537 | 0.5     | 0.50629 | 0.42994 |
| 0.53647 | 0.46446 |         | 0.4708  | 0.50417 | 0.54984 | 0.41404 |
| 0.53651 | 0.52977 |         | 0.44448 | 0.5     | 0.5     | 0.54104 |
| 0.5     | 0.45927 |         | 1       | 0.54427 | 0.53255 | 0.49234 |
| 0.4058  | 0.54147 |         | 0.5124  | 0.57415 | 0.5     | 0.55778 |
| 0.47409 | 0.26881 |         | 0.31394 | 0.26788 | 0.35136 | 0.39486 |
| 0.38893 | 0.28575 |         | 0.33974 | 0.5     | 0.57905 | 0.46628 |
| 0.5     | 0.44865 |         | 0.5     | 0.53992 | 0.5     | 0.53329 |
| 0.52523 |         | 0.5     | 0.5     | 0.5621  | 0.5     | 0.55267 |
| 0.45649 |         | 0.5     | 1       | 1       | 1       | 0.5     |
| 0.50036 |         | 0.5     | 0.62469 | 0.51272 | 0.65151 | 0.50324 |
| 0.4391  |         | 0.5     | 0.32991 | 0.33866 | 0.33333 | 0.33029 |
| 0.34798 | 0.30604 |         | 0.44142 | 0.5     | 0.46458 | 0.43204 |
| 0.5     | 0.60219 |         | 0.49922 | 0.47904 | 0.51772 | 0.51093 |
| 0.49432 | 0.60802 |         | 0.43536 | 0.52283 | 0.64106 | 0.50593 |
| 0.5     | 0.53837 |         | 1       | 1       | 1       | 1       |
| 0.5     | 0.47126 |         | 0.53011 | 0.52147 | 0.62139 | 0.56676 |
| 0.64262 | 0.45923 |         | 0.5183  | 0.36691 | 0.29924 | 0.38289 |
| 0.55223 | 0.35103 |         | 0.44313 | 0.5     | 0.4557  | 0.59393 |
| 0.49766 | 0.4748  |         | 0.43572 | 0.39305 | 0.5     | 0.5     |
| 0.63181 | 0.47635 |         | 0.51873 | 0.6092  | 0.5311  | 0.61869 |
| 0.53113 | 0.48711 |         | 1       | 1       | 1       | 1       |
| 1       | 1       |         | 0.56794 | 0.5     | 0.60584 | 0.53255 |
| 0.48872 | 0.57467 |         | 0.5     | 0.51988 | 0.51513 | 0.55747 |
| 0.65644 | 0.46825 |         | 0.49153 | 0.50829 | 0.51547 | 0.55986 |
| 0.50243 | 0.3509  |         | 0.5     | 0.5     | 0.43441 | 0.45751 |
| 0.3588  | 0.53542 |         | 0.51881 | 0.50296 | 0.51161 | 0.51743 |
| 0.5     | 0.38025 |         | 0.49649 | 1       | 1       | 1       |
| 1       | 1       |         | 1       | 0.40482 | 0.47027 | 0.44036 |
| 0.42049 | 0.49288 |         | 1       | 1       | 0.51766 | 0.5081  |
| 0.579   | 0.5     |         | 0.52693 | 0.50605 | 0.55014 | 0.5     |
| 0.54847 | 0.54504 |         | 0.5     | 0.59358 | 0.5147  | 0.5     |
| 0.44926 | 0.45984 |         | 0.47679 | 0.53662 | 0.5     | 0.67886 |
| 0.5061  | 1       |         | 1       | 1       | 1       | 1       |
| 1       | 1       |         | 1       | 1       | 1       | 0.57246 |
| 0.47126 |         | 1       | 1       | 1       | 1       | 0.5641  |
| 0.5     | 0.57012 |         | 0.5     | 0.62407 | 0.49001 | 0.51524 |
| 0.55315 | 0.50665 |         | 0.57962 | 0.50851 | 0.51792 | 0.5749  |
| 0.57432 | 0.54367 |         | 0.4548  | 0.5     | 0.45995 | 0.45688 |
| 1       | 1       |         | 1       | 1       | 1       | 1       |
| 1       | 1       |         | 1       | 1       | 1       | 1       |
| 1       | 1       |         | 1       | 1       | 1       | 0.44788 |
| 0.50866 | 0.47601 |         | 0.54675 | 0.53696 | 0.51934 | 0.51793 |



|         |         |         |         |         |         |         |
|---------|---------|---------|---------|---------|---------|---------|
| 1       | 1       | 1       | 1       | 1       | 1       | 1       |
| 1       | 1       | 0.46302 | 0.49237 | 0.41438 | 0.50909 |         |
| 1       | 1       | 1       | 1       | 1       | 1       |         |
| 1       | 1       | 1       | 1       | 1       | 1       |         |
| 1       | 1       | 1       | 0       | 0.42851 | 0.50406 |         |
| 0.4391  | 0.53129 | 0.5     | 0.42881 |         | 1       | 1       |
| 1       | 1       | 1       | 1       | 1       | 1       |         |
| 1       | 1       | 1       | 1       | 1       | 1       |         |
| 1       | 0       | 0       | 0.50065 | 0.33799 | 0.5     |         |
| 0.5     | 0.5     | 0.46771 | 0.56737 | 0.62347 |         | 1       |
| 1       | 1       | 1       | 1       | 1       | 1       |         |
| 1       | 1       | 1       | 1       | 1       | 1       |         |
| 1       | 1       | 0       | 0       | 0       | 0.5     |         |
| 0.55049 | 0.58763 | 0.60102 | 0.43952 |         | 0.5     | 0.51178 |
| 0.57323 | 0.41332 | 1       | 1       | 1       | 1       | 1       |
| 1       | 1       | 1       | 1       | 1       | 1       |         |
| 1       | 1       | 1       | 1       | 1       | 1       |         |
| 0       | 0       | 0       | 0       | 0.45238 | 0.44329 |         |
| 0.463   | 0.5     | 0.52498 | 0.72464 | 0.52909 | 0.48391 |         |
| 0.37621 | 0.52838 | 1       | 1       | 1       | 1       | 1       |
| 1       | 1       | 1       | 1       | 1       | 1       |         |
| 1       | 1       | 1       | 1       | 1       | 1       |         |
| 0       | 0       | 0       | 0       | 0       | 0       |         |
| 0.46644 | 0.5     | 0.5     | 0.50283 | 0.40598 | 0.49726 |         |
| 0.5801  | 0.48939 | 0.5     | 0.5     | 1       | 1       | 1       |
| 1       | 1       | 1       | 1       | 1       | 1       |         |
| 1       | 1       | 1       | 1       | 1       | 1       |         |
| 1       | 1       | 1       | 0       | 0       | 0       |         |
| 0       | 0       | 0       | 0.43313 | 0.44056 | 0.48851 |         |
| 0.40375 | 0.39797 | 0.60925 | 0.53406 | 0.49596 |         | 0.5     |
| 0.44509 | 0.6674  | 1       | 1       | 1       | 1       | 1       |
| 1       | 1       | 1       | 1       | 1       | 1       |         |
| 1       | 1       | 1       | 0.51212 | 0.5984  | 0.5     |         |
| 1       | 0       | 0       | 0       | 0       | 0       |         |
| 0       | 0       | 0.50462 | 0.51061 | 0.43778 | 0.5     |         |
| 0.47913 | 0.5     | 0.49339 | 0.5     | 0.48657 | 0.50287 |         |
| 0.5     | 1       | 1       | 1       | 1       | 1       | 1       |
| 1       | 1       | 1       | 1       | 1       | 1       |         |
| 0.5     | 0.51042 | 0.48312 | 0.50252 | 0.5     | 0.5     |         |
| 1       | 0       | 0       | 0       | 0       | 0       |         |
| 0       | 0       | 0.5     | 0.51728 | 0.487   | 0.44636 |         |
| 0.5     | 0.5     | 0.44474 | 0.5     | 0.49363 | 0.5     |         |
| 0.60713 | 1       | 1       | 1       | 1       | 1       | 1       |
| 1       | 1       | 1       | 1       | 0.50288 | 0.47458 |         |
| 0.45119 | 0.5     | 0.54214 | 0.41559 | 0.55856 | 0.5     |         |
| 0.5     | 1       | 0       | 0       | 0       | 0       |         |
| 0       | 0       | 0       | 0.54654 | 0.5     | 0.5     |         |
| 0.66526 | 0.38678 | 0.53093 | 0.42684 | 0.44745 | 0.47417 |         |
| 0.46406 | 0.5     | 0.5415  | 1       | 1       | 1       | 1       |
| 1       | 1       | 1       | 0.5     | 0.5     | 0.48063 |         |
| 0.53573 | 0.53967 | 0.41696 | 0.61025 | 0.5     | 0.57132 |         |
| 0.50213 | 0.46462 | 0.53094 | 0       | 0       | 0       | 0       |

|         |         |         |         |         |         |
|---------|---------|---------|---------|---------|---------|
| 0       | 0       | 0       | 0       | 0.5     | 0.5     |
| 0.5646  | 0.50596 | 0.54039 | 0.51797 | 0.5     | 0.38842 |
| 0.5     | 0.45949 | 0.45868 | 0.63348 | 1       | 1       |
| 1       | 0.5044  | 0.5     | 0.50122 | 0.54471 | 0.5     |
| 0.48265 | 0.43876 | 0.63542 | 0.65023 | 0.39191 | 0.5     |
| 0.54359 | 0.47452 | 0.49644 | 0.67763 | 0       | 0       |
| 0       | 0       | 0       | 0       | 0       | 0       |
| 0       | 0.59287 | 0.50451 | 0.58063 | 0.45952 | 0.46142 |
| 0.5     | 0.44086 | 0.56001 | 0.42732 | 0.5     | 0.47241 |
| 0.44681 | 0.42677 | 0.60579 | 0.39628 | 0.55662 | 0.59133 |
| 0.53005 | 0.5     | 0.5     | 0.5047  | 0.49362 | 0.52786 |
| 0.46297 | 0.50936 | 0.5     | 0.5615  | 0.42985 | 0.34537 |
| 0       | 0       | 0       | 0       | 0       | 0       |
| 0       | 0       | 0       | 0.5     | 0.5     | 0.33359 |
| 0.33333 | 0.33333 | 0.25309 | 0.33333 | 0.33333 | 0.18298 |
| 0.39621 | 0.25281 | 0.49705 | 0.34102 | 0.5     | 0.42113 |
| 0.51789 | 0.54043 | 0.49289 | 0.5     | 0.57144 | 0.47824 |
| 0.52613 | 0.38407 | 0.4479  | 0.5     | 0.48618 | 0.49387 |
| 0.5     | 0.5268  | 0       | 0       | 0       | 0       |
| 0       | 0       | 0       | 0       | 0       | 0       |
| 0.33333 | 0.29752 | 0.34332 | 0.33679 | 0.25921 | 0.27522 |
| 0.33333 | 0.36944 | 0.36503 | 0.33442 | 0.5098  | 0.43421 |
| 0.5     | 0.5     | 0.4222  | 0.49421 | 0.5     | 0.51621 |
| 0.44068 | 0.43252 | 0.44847 | 0.5     | 0.42994 | 0.3428  |
| 0.50892 | 0.5     | 0.37841 | 0.44118 | 0       | 0       |
| 0       | 0       | 0       | 0       | 0       | 0       |
| 0       | 0       | 0.25714 | 0.32568 | 0.32216 | 0.31214 |
| 0.33333 | 0.32564 | 0.27816 | 0.4074  | 0.3565  | 0.33333 |
| 0.49928 | 0.49441 | 0.51763 | 0.42625 | 0.50476 | 0.52305 |
| 0.5     | 0.48135 | 0.47973 | 0.43883 | 0.49758 | 0.5     |
| 0.5     | 0.53597 | 0.50549 | 0.5516  | 0.53015 | 0.53641 |
| 0       | 0       | 0       | 0       | 0       | 0       |
| 0       | 0       | 0       | 0       | 0       | 0.32889 |
| 0.34532 | 0.36636 | 0.34156 | 0.26793 | 0.38399 | 0.29824 |
| 0.24638 | 0.33104 | 0.56066 | 0.40045 | 0.43943 | 0.5036  |
| 0.52744 | 0.46184 | 0.5     | 0.5     | 0.45618 | 0.52171 |
| 0.4897  | 0.59908 | 0.5     | 0.62148 | 0.50304 | 0.46594 |
| 0.47262 | 0.55273 | 0       | 0       | 0       | 0       |
| 0       | 0       | 0       | 0       | 0       | 0       |
| 0       | 0.33879 | 0.38293 | 0.33333 | 0.26654 | 0.33201 |
| 0.35798 | 0.25267 | 0.33347 | 0.34712 | 0.53086 | 0.6183  |
| 0.5     | 0.5     | 0.54379 | 0.49808 | 0.5     | 0.41015 |
| 0.5     | 0.47779 | 0.5     | 0.58412 | 0.43511 | 0.54949 |
| 0.60403 | 0.49884 | 0.5     | 0.39494 | 0       | 0       |
| 0       | 0       | 0       | 0       | 0       | 0       |
| 0       | 0       | 0       | 0.35341 | 0.33046 | 0.3391  |
| 0.35346 | 0.26697 | 0.30427 | 0.36791 | 0.32477 | 0.31848 |
| 0.43784 | 0.43377 | 0.57879 | 0.38748 | 0.54406 | 0.38093 |
| 0.5     | 0.5     | 0.3422  | 0.5     | 0.5919  | 0.5     |
| 0.5     | 0.5     | 0.5     | 0.48056 | 0.5     | 0.5     |
| 0       | 0       | 0       | 0       | 0       | 0       |
| 0       | 0       | 0       | 0       | 0.33007 | 0.32215 |

|         |         |         |         |         |         |
|---------|---------|---------|---------|---------|---------|
| 0.40325 | 0.33664 | 0.34643 | 0.41752 | 0.36064 | 0.24129 |
| 0.32089 | 0.55938 | 0.49858 | 0.49298 | 0.5     | 0.50543 |
| 0.36452 | 0.49425 | 0.5     | 0.45322 | 0.44944 | 0.47852 |
| 0.51067 | 0.40863 | 0.5     | 0.48749 | 0.5     | 0.47632 |
| 0       | 0       | 0       | 0       | 0       | 0       |
| 0       | 0       | 0       | 0       | 0       | 0.35377 |
| 0.36371 | 0.34572 | 0.33333 | 0.34416 | 0.33333 | 0.33333 |
| 0.33333 | 0.32695 | 0.51374 | 0.50849 | 0.53998 | 0.5     |
| 0.39815 | 0.53265 | 0.48279 | 0.4444  | 0.50144 | 0.5     |
| 0.51984 | 0.5     | 0.5048  | 0.50325 | 0.51444 | 0.48643 |
| 0.5     | 0       | 0       | 0       | 0       | 0       |
| 0       | 0       | 0       | 0       | 0       | 0       |
| 0.38516 | 0.36029 | 0.27638 | 0.34498 | 0.28878 | 0.31487 |
| 0.33333 | 0.3259  | 0.68463 | 0.5     | 0.49371 | 0.57006 |
| 0.46353 | 0.53554 | 0.5292  | 0.49583 | 0.45016 | 0.58596 |
| 0.46349 | 0.47023 | 0.55552 | 0.5     | 0.5     | 0.45896 |
| 0.5     | 0.54073 | 0       | 0       | 0       | 0       |
| 0       | 0       | 0       | 0       | 0       | 0       |
| 0       | 0.3656  | 0.34629 | 0.36606 | 0.3367  | 0.3428  |
| 0.3229  | 0.3664  | 0.32053 | 0.5     | 0.42095 | 0.53372 |
| 0.5     | 0.55135 | 0.5     | 0.46008 | 0.5     | 0.46671 |
| 0.47477 | 0.5     | 0.5     | 0.4379  | 0.5     | 0.44733 |
| 0.54351 | 0.5     | 0       | 0       | 0       | 0       |
| 0       | 0       | 0       | 0       | 0       | 0       |
| 0       | 0       | 0.39979 | 0.32218 | 0.33333 | 0.33151 |
| 0.32335 | 0.3707  | 0.55858 | 0.5     | 0.53542 | 0.56796 |
| 0.5     | 0.39781 | 0.50078 | 0.52096 | 0.48228 | 0.48907 |
| 0.50568 | 0.39198 | 0.56464 | 0.47717 | 0.35894 | 0.49407 |
| 0.5     | 0.46163 | 0       | 0       | 0       | 0       |
| 0       | 0       | 0       | 0       | 0       | 0       |
| 0       | 0       | 0       | 0.26618 | 0.31209 | 0.23422 |
| 0.44777 | 0.64897 | 0.55687 | 0.5     | 0.5443  | 0.40607 |
| 0.50234 | 0.5252  | 0.56428 | 0.60695 | 0.5     | 0.5     |
| 0.36819 | 0.52365 | 0.48127 | 0.3908  | 0.4689  | 0.38131 |
| 0.46887 | 0.51289 | 0       | 0       | 0       | 0       |
| 0       | 0       | 0       | 0       | 0       | 0       |
| 0       | 0       | 0       | 0       | 0.48487 | 0.44253 |
| 0.34356 | 0.53175 | 0.50847 | 0.49171 | 0.48453 | 0.44014 |
| 0.49757 | 0.6491  | 0.5     | 0.5     | 0.56559 | 0.54249 |
| 0.6412  | 0.46458 | 0.48119 | 0.49704 | 0.48839 | 0.48257 |
| 0.5     | 0.61975 | 0.50351 | 0       | 0       | 0       |
| 0       | 0       | 0       | 0       | 0       | 0       |
| 0       | 0       | 0       | 0       | 0.48234 | 0.4919  |
| 0.421   | 0.5     | 0.47307 | 0.49395 | 0.44986 | 0.5     |
| 0.45153 | 0.45496 | 0.5     | 0.40642 | 0.4853  | 0.5     |
| 0.55074 | 0.54016 | 0.52321 | 0.46338 | 0.5     | 0.32114 |
| 0.4939  | 0       | 0       | 0       | 0       | 0       |
| 0       | 0       | 0       | 0       | 0       | 0       |
| 0       | 0       | 0       | 0       | 0       | 0.4359  |
| 0.5     | 0.42988 | 0.5     | 0.37593 | 0.50999 | 0.48476 |
| 0.44685 | 0.49335 | 0.42038 | 0.49149 | 0.48208 | 0.4251  |
| 0.42568 | 0.45633 | 0.5452  | 0.5     | 0.54005 | 0.54312 |



|         |         |         |         |         |         |   |
|---------|---------|---------|---------|---------|---------|---|
| 0       | 0       | 0       | 0       | 0       | 0       | 0 |
| 0       |         |         |         |         |         |   |
| gtSp=0  | 0       | 0       | 0       | 0       | 0       | 0 |
| 0       | 0       | 0       | 0       | 0       | 0       | 0 |
| 0       | 0       | 0       | 0       | 0       | 0       | 0 |
| 0       | 0       | 0.53698 | 0.50763 | 0.58562 | 0.49091 |   |
| 0       | 0       | 0       | 0       | 0       | 0       |   |
| 0       | 0       | 0       | 0       | 0       | 0       |   |
| 0       | 0       | 0       | 1       | 0.57149 | 0.49594 |   |
| 0.5609  | 0.46871 | 0.5     | 0.57119 | 0       | 0       | 0 |
| 0       | 0       | 0       | 0       | 0       | 0       |   |
| 0       | 0       | 0       | 0       | 0       | 0       |   |
| 0       | 1       | 1       | 0.49935 | 0.66201 | 0.5     |   |
| 0.5     | 0.5     | 0.53229 | 0.43263 | 0.37653 | 0       |   |
| 0       | 0       | 0       | 0       | 0       | 0       |   |
| 0       | 0       | 0       | 0       | 0       | 0       |   |
| 0       | 0       | 1       | 1       | 1       | 0.5     |   |
| 0.44951 | 0.41237 | 0.39898 | 0.56048 | 0.5     | 0.48822 |   |
| 0.42677 | 0.58668 | 0       | 0       | 0       | 0       | 0 |
| 0       | 0       | 0       | 0       | 0       | 0       |   |
| 0       | 0       | 0       | 0       | 0       | 0       |   |
| 1       | 1       | 1       | 1       | 0.54762 | 0.55671 |   |
| 0.537   | 0.5     | 0.47502 | 0.27536 | 0.47091 | 0.51609 |   |
| 0.62379 | 0.47162 | 0       | 0       | 0       | 0       | 0 |
| 0       | 0       | 0       | 0       | 0       | 0       |   |
| 0       | 0       | 0       | 0       | 0       | 0       |   |
| 1       | 1       | 1       | 1       | 1       | 1       |   |
| 0.53356 | 0.5     | 0.5     | 0.49717 | 0.59402 | 0.50274 |   |
| 0.4199  | 0.51061 | 0.5     | 0.5     | 0       | 0       | 0 |
| 0       | 0       | 0       | 0       | 0       | 0       |   |
| 0       | 0       | 0       | 0       | 0       | 0       |   |
| 0       | 0       | 0       | 1       | 1       | 1       |   |
| 1       | 1       | 1       | 0.56687 | 0.55944 | 0.51149 |   |
| 0.59625 | 0.60203 | 0.39075 | 0.46594 | 0.50404 | 0.5     |   |
| 0.55491 | 0.3326  | 0       | 0       | 0       | 0       | 0 |
| 0       | 0       | 0       | 0       | 0       | 0       |   |
| 0       | 0       | 0       | 0       | 0       | 0       |   |
| 0       | 1       | 1       | 1       | 1       | 1       |   |
| 1       | 1       | 0.49538 | 0.48939 | 0.56222 | 0.5     |   |
| 0.52087 | 0.5     | 0.50661 | 0.5     | 0.51343 | 0.49713 |   |
| 0.5     | 0       | 0       | 0       | 0       | 0       |   |
| 0       | 0       | 0       | 0       | 0       | 0       |   |
| 0       | 0       | 0       | 0       | 0       | 0       |   |
| 0       | 1       | 1       | 1       | 1       | 1       |   |
| 1       | 1       | 0.5     | 0.48272 | 0.513   | 0.55364 |   |
| 0.5     | 0.5     | 0.55526 | 0.5     | 0.50637 | 0.5     |   |
| 0.39287 | 0       | 0       | 0       | 0       | 0       | 0 |
| 0       | 0       | 0       | 0       | 0       | 0       |   |
| 0       | 0       | 0       | 0       | 0       | 0       |   |
| 0       | 0       | 1       | 1       | 1       | 1       |   |
| 1       | 1       | 1       | 0.45346 | 0.5     | 0.5     |   |
| 0.33474 | 0.61322 | 0.46907 | 0.57316 | 0.55255 | 0.52583 |   |



|         |  |         |         |  |         |  |         |  |         |
|---------|--|---------|---------|--|---------|--|---------|--|---------|
| 0.53594 |  | 0.5     | 0.4585  |  | 0       |  | 0       |  | 0       |
| 0       |  | 0       | 0       |  | 0       |  | 0       |  | 0       |
| 0       |  | 0       | 0       |  | 0       |  | 0       |  | 0       |
| 0       |  | 0       | 0       |  | 1       |  | 1       |  | 1       |
| 1       |  | 1       | 1       |  | 1       |  | 0.5     |  | 0.5     |
| 0.4354  |  | 0.49404 | 0.45961 |  | 0.48203 |  | 0.5     |  | 0.61158 |
| 0.5     |  | 0.54051 | 0.54132 |  | 0.36652 |  | 0       |  | 0       |
| 0       |  | 0       | 0       |  | 0       |  | 0       |  | 0       |
| 0       |  | 0       | 0       |  | 0       |  | 0       |  | 0       |
| 0       |  | 0       | 0       |  | 0       |  | 1       |  | 1       |
| 1       |  | 1       | 1       |  | 1       |  | 1       |  | 1       |
| 1       |  | 0.40713 | 0.49549 |  | 0.41937 |  | 0.54048 |  | 0.53858 |
| 0.5     |  | 0.55914 | 0.43999 |  | 0.57268 |  | 0.5     |  | 0.52759 |
| 0       |  | 0       | 0       |  | 0       |  | 0       |  | 0       |
| 0       |  | 0       | 0       |  | 0       |  | 0       |  | 0       |
| 0       |  | 0       | 0       |  | 0       |  | 0       |  | 0       |
| 1       |  | 1       | 1       |  | 1       |  | 1       |  | 1       |
| 1       |  | 1       | 1       |  | 0.5     |  | 0.5     |  | 0.36756 |
| 0.33333 |  | 0.33333 | 0.37346 |  | 0.33333 |  | 0.33333 |  | 0.40572 |
| 0.22417 |  | 0.41874 | 0       |  | 0       |  | 0       |  | 0       |
| 0       |  | 0       | 0       |  | 0       |  | 0       |  | 0       |
| 0       |  | 0       | 0       |  | 0       |  | 0       |  | 0       |
| 0       |  | 0       | 1       |  | 1       |  | 1       |  | 1       |
| 1       |  | 1       | 1       |  | 1       |  | 1       |  | 0.5     |
| 0.33333 |  | 0.35607 | 0.34332 |  | 0.32642 |  | 0.41001 |  | 0.36239 |
| 0.33333 |  | 0.36944 | 0.33797 |  | 0.33442 |  | 0       |  | 0       |
| 0       |  | 0       | 0       |  | 0       |  | 0       |  | 0       |
| 0       |  | 0       | 0       |  | 0       |  | 0       |  | 0       |
| 0       |  | 0       | 0       |  | 0       |  | 1       |  | 1       |
| 1       |  | 1       | 1       |  | 1       |  | 1       |  | 0.5     |
| 0.52017 |  | 0.5     | 0.37143 |  | 0.39557 |  | 0.33892 |  | 0.34393 |
| 0.33333 |  | 0.33718 | 0.39785 |  | 0.22121 |  | 0.287   |  | 0.33333 |
| 0       |  | 0       | 0       |  | 0       |  | 0       |  | 0       |
| 0       |  | 0       | 0       |  | 0       |  | 0       |  | 0       |
| 0       |  | 0       | 0       |  | 0       |  | 0       |  | 0       |
| 1       |  | 1       | 1       |  | 1       |  | 1       |  | 1       |
| 0.51641 |  | 0.5     | 0.5     |  | 0.51186 |  | 0.51612 |  | 0.30083 |
| 0.35614 |  | 0.32453 | 0.34156 |  | 0.43362 |  | 0.38399 |  | 0.35088 |
| 0.37632 |  | 0.29475 | 0       |  | 0       |  | 0       |  | 0       |
| 0       |  | 0       | 0       |  | 0       |  | 0       |  | 0       |
| 0       |  | 0       | 0       |  | 0       |  | 0       |  | 0       |
| 0       |  | 0       | 1       |  | 1       |  | 1       |  | 1       |
| 1       |  | 0.53049 | 0.53748 |  | 0.48078 |  | 0.4613  |  | 0.5     |
| 0.5     |  | 0.32242 | 0.29777 |  | 0.33333 |  | 0.35101 |  | 0.2903  |
| 0.33642 |  | 0.36034 | 0.33347 |  | 0.34712 |  | 0       |  | 0       |
| 0       |  | 0       | 0       |  | 0       |  | 0       |  | 0       |
| 0       |  | 0       | 0       |  | 0       |  | 0       |  | 0       |
| 0       |  | 0       | 0       |  | 0       |  | 1       |  | 1       |
| 1       |  | 0.53945 | 0.4917  |  | 0.42125 |  | 0.5     |  | 0.48896 |
| 0.53436 |  | 0.40551 | 0.54984 |  | 0.28918 |  | 0.30852 |  | 0.3391  |
| 0.29309 |  | 0.44128 | 0.37064 |  | 0.36791 |  | 0.28597 |  | 0.33669 |
| 0       |  | 0       | 0       |  | 0       |  | 0       |  | 0       |

|         |         |         |         |         |         |         |
|---------|---------|---------|---------|---------|---------|---------|
| 0       | 0       | 0       | 0       | 0       | 0       | 0       |
| 0       | 0       | 0       | 0       | 0       | 0       | 0       |
| 1       | 0.5     | 0.4754  | 0.41231 | 0.5     | 0.5     | 0.5     |
| 0.49247 | 0.3978  | 0.47847 | 0.5     | 0.33496 | 0.37384 | 0.37384 |
| 0.27224 | 0.26642 | 0.32777 | 0.29002 | 0.27873 | 0.39451 | 0.39451 |
| 0.34439 | 0       | 0       | 0       | 0       | 0       | 0       |
| 0       | 0       | 0       | 0       | 0       | 0       | 0       |
| 0       | 0       | 0       | 0       | 0       | 0       | 0       |
| 0       | 0.48929 | 0.57959 | 0.58059 | 0.4516  | 0.57159 | 0.57159 |
| 0.52057 | 0.5     | 0.50341 | 0.5     | 0.50208 | 0.3205  | 0.3205  |
| 0.35901 | 0.34044 | 0.33333 | 0.25163 | 0.33333 | 0.33333 | 0.33333 |
| 0.33333 | 0.3487  | 0       | 0       | 0       | 0       | 0       |
| 0       | 0       | 0       | 0       | 0       | 0       | 0       |
| 0       | 0       | 0       | 0       | 0       | 0       | 0       |
| 0       | 0       | 0.5     | 0.56454 | 0.55574 | 0.5     | 0.5     |
| 0.54887 | 0.53799 | 0.46084 | 0.5     | 0.41626 | 0.47211 | 0.47211 |
| 0.36324 | 0.29374 | 0.37812 | 0.34498 | 0.36158 | 0.34256 | 0.34256 |
| 0.33333 | 0.37509 | 0       | 0       | 0       | 0       | 0       |
| 0       | 0       | 0       | 0       | 0       | 0       | 0       |
| 0       | 0       | 0       | 0       | 0       | 0       | 0       |
| 0       | 0       | 0       | 0.45573 | 0.46745 | 0.50766 | 0.50766 |
| 0.5942  | 0.45853 | 0.4876  | 0.42585 | 0.5     | 0.44222 | 0.44222 |
| 0.52591 | 0.3656  | 0.33977 | 0.36606 | 0.31194 | 0.26234 | 0.26234 |
| 0.28817 | 0.34785 | 0.33974 | 0       | 0       | 0       | 0       |
| 0       | 0       | 0       | 0       | 0       | 0       | 0       |
| 0       | 0       | 0       | 0       | 0       | 0       | 0       |
| 0       | 0       | 0       | 0       | 0       | 0.5     | 0.5     |
| 0.49964 | 0.5     | 0.37531 | 0.48728 | 0.34849 | 0.49676 | 0.49676 |
| 0.5609  | 0.5     | 0.2703  | 0.33917 | 0.33333 | 0.33819 | 0.33819 |
| 0.32867 | 0.32325 | 0       | 0       | 0       | 0       | 0       |
| 0       | 0       | 0       | 0       | 0       | 0       | 0       |
| 0       | 0       | 0       | 0       | 0       | 0       | 0       |
| 0       | 0       | 0       | 0       | 0       | 0       | 0       |
| 0.5     | 0.52874 | 0.46989 | 0.47853 | 0.37861 | 0.43324 | 0.43324 |
| 0.35738 | 0.54077 | 0.4817  | 0.36691 | 0.38866 | 0.38289 | 0.38289 |
| 0       | 0       | 0       | 0       | 0       | 0       | 0       |
| 0       | 0       | 0       | 0       | 0       | 0       | 0       |
| 0       | 0       | 0       | 0       | 0       | 0       | 0       |
| 0       | 0       | 0       | 0       | 0       | 0       | 0       |
| 0       | 0       | 0.43206 | 0.5     | 0.39416 | 0.46745 | 0.46745 |
| 0.51128 | 0.42533 | 0.5     | 0.48012 | 0       | 0       | 0       |
| 0       | 0       | 0       | 0       | 0       | 0       | 0       |
| 0       | 0       | 0       | 0       | 0       | 0       | 0       |
| 0       | 0       | 0       | 0       | 0       | 0       | 0       |
| 0       | 0       | 0       | 0       | 0       | 0       | 0       |
| 0       | 0       | 0       | 0.59518 | 0.52973 | 0.55964 | 0.55964 |
| 0.57951 | 0.50712 | 0       | 0       | 0       | 0       | 0       |
| 0       | 0       | 0       | 0       | 0       | 0       | 0       |
| 0       | 0       | 0       | 0       | 0       | 0       | 0       |
| 0       | 0       | 0       | 0       | 0       | 0       | 0       |
| 0       | 0       | 0       | 0       | 0       | 0       | 0       |
| 0       | 0       | 0       | 0       | 0       | 0.42754 | 0.42754 |



|   |   |   |   |   |   |   |
|---|---|---|---|---|---|---|
| 0 | 0 | 0 | 0 | 0 | 0 | 0 |
| 0 | 0 | 0 | 0 | 0 | 0 | 0 |
| 0 | 0 | 0 | 0 | 0 | 0 | 0 |
| 0 | 0 | 0 | 0 | 0 | 0 | 0 |
| 0 | 0 | 0 | 0 | 0 | 0 | 0 |
| 0 | 0 | 0 | 0 | 0 | 0 | 0 |

gtTCf=

0  
0.11925  
0.14534  
0.13574  
0.11593  
0.096197  
0.079948  
0.067704  
0.058926  
0.052819  
0.048646  
0.045817  
0.043898  
0.042582  
0.041662  
0.040998  
0.040498  
0.040102

gtTCs=

0  
0.07155  
0.116  
0.14393  
0.16177  
0.17342  
0.18126  
0.18671  
0.19067  
0.19366  
0.19601  
0.19792  
0.19952  
0.20088  
0.20206  
0.20309  
0.20398  
0.20476

gtTCp=

0  
2.385  
1.5979  
1.1196

0.8287  
0.65143  
0.54309  
0.47655  
0.43538  
0.4096  
0.39316  
0.38239  
0.37506  
0.36982  
0.36585  
0.36266  
0.35995  
0.35753

X\_mask=

0.0030685, 2.2204e-016, 2.2204e-016, 2.2204e-016, 2.2204e-016, 2.2204e-016, 0.004374, 2.2204e-016, 0.0011435, 2.2204e-016, 0.0097365, 2.2204e-016, 2.2204e-016, 0.012221, 0.00020301, 0.0020754, 0.0010208, 0.0035671, 0.012452, 0.0018718, 2.2204e-016, 0.036644, 2.2204e-016, 2.2204e-016, 2.2204e-016, 2.2204e-016, 0.010207, 0.00056438, 0.006216, 2.2204e-016, 0.0012772, 0.0035536, 2.2204e-016, 0.0091167, 0.0083212, 0.0059096, 2.2204e-016, 0.0011077, 2.2204e-016, 2.2204e-016, 2.2204e-016, 2.2204e-016, 0.013554, 2.2204e-016, 0.017722, 2.2204e-016, 2.2204e-016, 0.00094705, 0.0037262, 0.00080915, 2.2204e-016, 2.2204e-016, 0.0037398, 2.2204e-016, 2.2204e-016, 2.2204e-016, 2.2204e-016, 0.0014895, 0.0026633, 0.0016327, 2.2204e-016, 2.2204e-016, 0.0045177, 2.2204e-016, 0.040232, 2.2204e-016, 0.022117, 0.019791, 0.0074744, 0.042956, 2.2204e-016, 0.0088503, 2.2204e-016, 0.0015828, 2.2204e-016, 2.2204e-016, 2.2204e-016, 0.0027895, 0.0027944, 0.0052966, 2.2204e-016, 2.2204e-016, 2.2204e-016, 0.0018904, 2.2204e-016, 2.2204e-016, 0.0046743, 0.0096896, 2.2204e-016, 2.2204e-016, 2.2204e-016, 0.033871, 2.2204e-016, 2.2204e-016, 2.2204e-016, 0.047579, 2.2204e-016, 2.2204e-016, 2.2204e-016, 2.2204e-016, 2.2204e-016, 0.010278, 0.0012764, 0.0064898, 0.0095092, 0.0022309, 0.00050207, 2.2204e-016, 2.2204e-016, 2.2204e-016, 2.2204e-016, 0.0084324, 0.0057722, 2.2204e-016, 0.012171, 2.2204e-016, 0.040593, 2.2204e-016, 0.013132, 2.2204e-016, 0.060174, 0.0055757, 0.031659, 0.014337, 2.2204e-016, 0.0036402, 0.014674, 2.2204e-016, 2.2204e-016, 2.2204e-016, 2.2204e-016, 2.2204e-016, 2.2204e-016, 2.2204e-016, 0.003538, 0.0043874, 0.00018597, 0.0023329, 0.00012237, 0.0079741, 2.2204e-016, 0.0049791, 0.0076445, 0.0038364, 0.0040629, 0.0081828, 2.2204e-016, 0.020728, 0.077192, 2.2204e-016, 0.043128, 0.036202, 0.033268, 0.012408, 2.2204e-016, 2.2204e-016, 0.0048157, 2.2204e-016, 0.027145, 2.2204e-016, 0.012795, 2.2204e-016, 0.00045552, 0.0049595, 2.2204e-016, 0.0085097, 2.2204e-016, 0.0027878, 0.0024895, 2.2204e-016, 2.2204e-016, 0.0014493, 2.2204e-016, 0.00060938, 0.0051862, 2.2204e-016, 0.0010655, 2.2204e-016, 0.033569, 0.048231, 2.2204e-016, 0.06976, 2.2204e-016, 2.2204e-016, 0.0026037, 2.2204e-016, 2.2204e-016, 2.2204e-016, 2.2204e-016, 2.2204e-016, 2.2204e-016



016,0.0045066,0.0021409,0.0029124,2.2204e-  
016,0.0025844,0.0014978,2.2204e-016,0.0020949,2.2204e-016,2.2204e-  
016,0.0025743,0.060235,2.2204e-016,2.2204e-  
016,0.044056,0.042284,2.2204e-016,0.02872,0.013256,2.2204e-  
016,0.0021936,2.2204e-016,2.2204e-  
016,0.054713,0.0044473,0.020621,0.03333,0.0040573,0.0051484,2.2204e-  
016,0.0074991,2.2204e-016,0.003131,2.2204e-016,0.0031216,2.2204e-  
016,2.2204e-  
016,0.00022334,0.00044499,0.0028364,0.0017623,0.0045956,2.2204e-  
016,0.00072722,2.2204e-016,0.00075972,2.2204e-016,2.2204e-  
016,0.0033052,0.014312,0.0014771,0.0064453,0.057773,2.2204e-  
016,0.014078,0.0008548,2.2204e-016,0.020581,0.014324,2.2204e-  
016,2.2204e-016,0.010451,0.016303,2.2204e-016,0.021226,2.2204e-  
016,2.2204e-016,2.2204e-016,0.011545,2.2204e-016,2.2204e-  
016,0.0052844,2.2204e-016,0.0036378,0.00078492,0.0025908,2.2204e-  
016,0.0013165,2.2204e-016,0.0019123,2.2204e-016,2.2204e-016,2.2204e-  
016,0.00018534,0.00093307,2.2204e-016,2.2204e-  
016,0.056812,0.045425,0.0051524,2.2204e-  
016,0.015878,0.0060945,2.2204e-016,0.0433,2.2204e-016,2.2204e-  
016,2.2204e-016,2.2204e-016,2.2204e-  
016,0.0061174,0.0060213,0.0015804,0.024196,0.037895,2.2204e-  
016,0.0022068,2.2204e-  
016,0.0014682,0.0028184,0.0002515,0.0039516,0.0059682,0.0058949,0.0015  
417,0.00030008,0.0032758,0.0014431,2.2204e-016,0.0027716,2.2204e-  
016,0.0012645,2.2204e-016,2.2204e-016,2.2204e-016,2.2204e-  
016,0.038673,0.043208,0.038908,0.099306,0.0065362,0.013425,2.2204e-  
016,0.01098,2.2204e-016,2.2204e-016,0.01695,0.023771,2.2204e-  
016,0.0090705,2.2204e-016,0.020984,0.015145,2.2204e-  
016,0.053983,0.0021179,2.2204e-016,2.2204e-016,2.2204e-  
016,0.0013782,0.00052915,0.0010479,2.2204e-016,2.2204e-016,2.2204e-  
016,0.0068392,0.0031131,2.2204e-016,2.2204e-016,0.003046,2.2204e-  
016,2.2204e-016,2.2204e-016,0.034424,0.0018515,2.2204e-  
016,0.027276,2.2204e-016,2.2204e-016,2.2204e-016,0.02958,2.2204e-  
016,2.2204e-016,0.024828,2.2204e-016,2.2204e-016,2.2204e-016,2.2204e-  
016,2.2204e-016,2.2204e-016,2.2204e-016,0.06219,0.0016565,2.2204e-  
016,0.0038331,2.2204e-016,2.2204e-  
016,0.0013687,0.0024013,0.0021543,0.0027958,2.2204e-016,2.2204e-  
016,0.0059349,2.2204e-016,2.2204e-016,0.0024944,2.2204e-016,2.2204e-  
016,0.0014041,0.035175,0.010141,0.024787,2.2204e-  
016,0.053174,0.040674,2.2204e-016,0.026337,2.2204e-  
016,0.012235,0.0054407,0.032988,2.2204e-016,2.2204e-016,2.2204e-  
016,0.014293,2.2204e-016,0.004951,2.2204e-016,2.2204e-  
016,0.0045219,0.00091885,2.2204e-016,0.0029617,2.2204e-016,2.2204e-  
016,0.0026886,0.0053286,0.0043011,0.0033572,0.0031217,0.00084863,2.220  
4e-016,0.0022841,0.0024899,2.2204e-016,2.2204e-016,0.015228,2.2204e-  
016,2.2204e-016,2.2204e-016,0.009834,2.2204e-016,2.2204e-  
016,0.042316,2.2204e-016,2.2204e-016,2.2204e-  
016,0.011016,0.023328,2.2204e-016,0.0064258,0.022151,2.2204e-  
016,0.0027134,2.2204e-016,2.2204e-016,0.0054936,0.0029938,2.2204e-  
016,0.0028763,2.2204e-016,0.0046997,2.2204e-016,2.2204e-  
016,0.0010462,0.0039261,2.2204e-016,0.0019031,2.2204e-016,2.2204e-  
016,0.0038686,0.0032784,0.00042593,0.035451,0.015731,0.042779,0.031457

,0.028075,2.2204e-016,0.029428,0.025666,0.00030811,2.2204e-016,2.2204e-016,2.2204e-016,0.030472,2.2204e-016,0.029692,0.039308,0.022642,0.0073926,2.2204e-016,0.0054804,0.0039839,2.2204e-016,0.0043288,0.0016175,2.2204e-016,2.2204e-016,2.2204e-016,0.0038627,0.0038675,2.2204e-016,2.2204e-016,2.2204e-016,0.00068903,2.2204e-016,2.2204e-016,0.0029987,0.0078475,0.0093329,2.2204e-016,2.2204e-016,2.2204e-016,0.013827,0.023411,0.0076299,2.2204e-016,0.016724,2.2204e-016,2.2204e-016,2.2204e-016,2.2204e-016,0.0061785,2.2204e-016,0.0017294,0.0030031,2.2204e-016,0.0065302,2.2204e-016,2.2204e-016,2.2204e-016,0.0025491,2.2204e-016,0.0047739,2.2204e-016,0.0024763,0.00098973,2.2204e-016,0.0044746,2.2204e-016,2.2204e-016,2.2204e-016,2.2204e-016,0.0065619,0.00095811,2.2204e-016,2.2204e-016,2.2204e-016,0.024146,0.011741,0.016488,2.2204e-016,2.2204e-016,0.062593,2.2204e-016,0.0011202,0.010939,0.0035477,0.0014366,3.5091e-005,0.00079899,0.00062427,2.2204e-016,2.2204e-016,0.0019098,2.2204e-016,0.003172,0.00096879,5.9199e-006,0.0053819,2.2204e-016,2.2204e-016,0.0037379,0.0014046,2.2204e-016,0.0036114,0.0018821,0.001436,2.2204e-016,0.0027867,0.001266,2.2204e-016,0.0033505,2.2204e-016,2.2204e-016,0.0076414,2.2204e-016,0.012664,2.2204e-016,2.2204e-016,0.017153,0.0010112,2.2204e-016,0.0048121,0.002546,9.0675e-005,2.2204e-016,0.0010343,2.2204e-016,0.002154,2.2204e-016,2.2204e-016,2.2204e-016,2.2204e-016,2.2204e-016,0.00013637,2.2204e-016,2.2204e-016,2.2204e-016,0.0052861,2.2204e-016,2.2204e-016,2.2204e-016,0.0067639,2.2204e-016,0.0032181,2.2204e-016,2.2204e-016,2.2204e-016,2.2204e-016,0.011176,0.00099206,0.022779,2.2204e-016,0.0039804,0.0031404,2.2204e-016,0.0011352,2.2204e-016,2.2204e-016,0.0015354,0.0079071,2.2204e-016,0.0022237,0.0031313,0.0026836,2.2204e-016,2.2204e-016,0.0014953,2.2204e-016,2.2204e-016,0.00085627,0.0010683,2.2204e-016,2.2204e-016,0.0041698,0.00226,2.2204e-016,2.2204e-016,2.2204e-016,0.0021325,2.2204e-016,2.2204e-016,0.0057549,0.0083525,2.2204e-016,0.0016956,2.2204e-016,0.025189,2.2204e-016,2.2204e-016,0.0030239,0.003107,2.2204e-016,2.2204e-016,2.2204e-016,2.2204e-016,2.2204e-016,2.2204e-016,2.2204e-016,0.0020127,0.0030189,2.2204e-016,2.2204e-016,2.2204e-016,2.2204e-016,0.0026682,0.0010956,0.00028125,2.2204e-016,2.2204e-016,2.2204e-016,2.2204e-016,2.2204e-016,0.0032289,2.2204e-016,0.0028973,0.00081433,0.0020203,2.2204e-016,0.0064357,0.00036508,0.0089603,2.2204e-016,0.010925,2.2204e-016,2.2204e-016,2.2204e-016,0.0057535,2.2204e-016,0.0001404,0.010643,2.2204e-016,0.0015344,2.2204e-016,0.00281,2.2204e-016,2.2204e-016,2.2204e-016,2.2204e-016,2.2204e-016,6.0233e-005,0.0013796,2.2204e-016,2.2204e-016,2.2204e-016,2.2204e-016,0.0068342,0.0032938,0.0044504,2.2204e-016,2.2204e-016,2.2204e-016,2.2204e-016,0.0021831,2.2204e-016,0.00077259,2.2204e-016,2.2204e-016,2.2204e-016,2.2204e-016,2.2204e-016,2.2204e-016,0.007759,0.0037224,0.0069987,2.2204e-016,2.2204e-016,2.2204e-016,0.0033682,2.2204e-016,2.2204e-016,0.00024815,2.2204e-016,0.0013624,2.2204e-016,2.2204e-016,0.0039433,2.2204e-016



016,0.0039596,2.2204e-016,0.0019664,2.2204e-016,0.00078357,2.2204e-  
016,0.0020883,2.2204e-016,0.007504,2.2204e-016,2.2204e-016,2.2204e-  
016,2.2204e-016,2.2204e-016,2.2204e-016,2.2204e-  
016,0.001713,0.0094698,2.2204e-016,2.2204e-016,2.2204e-016,2.2204e-  
016,0.0035868,0.0049329,2.2204e-016,2.2204e-016,2.2204e-016,2.2204e-  
016,0.0013358,0.0034604,0.0050097,2.2204e-016,2.2204e-  
016,0.0037518,2.2204e-016,0.00054526,0.0019621,2.2204e-  
016,0.0042239,2.2204e-016,2.2204e-016,0.0078893,2.2204e-  
016,0.00060347,2.2204e-016,2.2204e-  
016,0.0030566,0.002739,0.0013653,0.00071766,0.0022973,2.2204e-  
016,0.0050798,0.0042592,0.0013121,0.0012193,0.00063746,2.2204e-  
016,2.2204e-016,2.2204e-016,2.2204e-016,0.0022006,2.2204e-016,2.2204e-  
016,2.2204e-016,2.2204e-016,2.2204e-  
016,0.010985,0.0013555,0.00026528,2.2204e-016,2.2204e-  
016,0.0019861,2.2204e-016,2.2204e-016,2.2204e-  
016,0.0045719,0.0006326,2.2204e-016,2.2204e-016,2.2204e-016,2.2204e-  
016,0.00093542,2.2204e-016,0.00060524,0.0041798,2.2204e-  
016,0.00093996,0.0034914,0.0015237,2.2204e-  
016,0.0024591,0.0029091,0.0003937,2.2204e-016,0.0033718,2.2204e-  
016,2.2204e-016,0.0017944,0.0020824,2.2204e-  
016,0.0014675,0.0052423,2.2204e-016,2.2204e-016,2.2204e-  
016,0.00047406,0.00091473,0.0004403,0.0023627,2.2204e-016,2.2204e-  
016,2.2204e-016,0.0013215,3.3251e-006,0.0082803,2.2204e-  
016,0.0018308,2.2204e-016,2.2204e-016,2.2204e-  
016,0.0024163,0.0018022,2.2204e-016,2.2204e-016,0.0014841,2.2204e-  
016,2.2204e-016,0.0020027,0.0036617,2.2204e-016,5.5292e-005,2.2204e-  
016,0.0078926,2.2204e-016,2.2204e-016,0.001693,2.2204e-  
016,0.0016643,0.0072206,0.010105,0.0025361,0.0054088,2.2204e-  
016,2.2204e-016,0.0065656,0.0035042,0.0025087,2.2204e-  
016,0.0015145,2.2204e-016,0.00096892,0.0026204,2.2204e-  
016,0.0037793,2.2204e-016,2.2204e-016,0.0029207,2.2204e-  
016,0.0023301,2.2204e-016,2.2204e-016,0.0053225,2.2204e-  
016,0.0092346,2.2204e-016,2.2204e-  
016,0.00079802,0.00079448,0.00016257,2.2204e-016,2.2204e-016,2.2204e-  
016,0.0080023,2.2204e-016,2.2204e-016,2.2204e-016,2.2204e-016,2.2204e-  
016,0.0017854,0.0031992,0.00094338,0.0022198,0.0039705,0.0099131,2.220  
4e-016,0.0055613,0.0051987,2.2204e-016,2.2204e-016,0.0061364,2.2204e-  
016,0.0055153,0.001588,0.0012244,2.2204e-016,2.2204e-  
016,0.0040303,0.00066867,2.2204e-016,0.0051824,2.2204e-  
016,0.00091381,2.2204e-016,0.00067634,2.2204e-016,2.2204e-  
016,0.0046336,0.004478,0.00080161,2.2204e-016,2.2204e-  
016,0.0047589,2.2204e-  
016,0.00049626,0.0037475,0.00028147,0.001703,2.2204e-  
016,0.0031452,2.2204e-016,2.2204e-016,0.004668,2.2204e-  
016,0.0068466,0.00050979,2.2204e-016,0.0040545,0.0046587,2.2204e-  
016,0.00043927,0.00067623,0.0016763,2.2204e-016,0.00033709,2.2204e-  
016,2.2204e-016,0.0051377,0.0041248,2.2204e-  
016,0.002927,0.00066479,0.0037765,2.2204e-016,0.0016742,2.2204e-  
016,0.0069575,2.2204e-016,0.0031158,0.0045473,2.2204e-016,0.00018057  
0.072317,0.073784,0.076856,0.075182,0.065173,0.059397,0.078953,0.06563  
,0.073475,0.065839,0.079499,0.070998,0.066095,0.082367,0.070568,0.0753  
37,0.070068,0.071107,0.07748,0.072463,1.3079,1.2816,1.4243,1.1776,0.06

436,0.065965,0.083209,0.07374,0.077142,0.067641,0.070407,0.073547,0.069978,0.077126,0.07704,0.078426,0.07226,0.075234,0.061807,2.2914,1.3637,1.1781,1.4135,1.1206,1.2429,1.388,0.064465,0.068299,0.078468,0.07413,0.065463,0.072781,0.074119,0.070624,0.066587,0.062633,0.073893,0.075419,0.06944,0.059055,0.067352,2.3433,2.3562,1.2669,1.5639,1.2274,1.2548,1.2407,1.3335,1.0384,0.96781,0.070284,0.071748,0.064074,0.07067,0.06646,0.069368,0.073459,0.072384,0.07149,0.071839,0.059624,0.072191,0.070325,0.069142,0.076958,2.4365,2.3442,2.3225,1.2353,1.1279,0.97038,0.9779,1.3451,1.2799,1.1844,1.0454,1.3969,0.062919,0.084542,0.078263,0.080026,0.081237,0.074702,0.074466,0.063766,0.068384,0.0737,0.063898,0.078668,0.075967,0.060789,0.077055,0.064024,2.4194,2.309,2.4384,2.3136,1.3816,1.3581,1.3524,1.2419,1.1668,0.70589,1.1618,1.2509,1.5017,1.1747,0.068443,0.068223,0.063656,0.067484,0.070171,0.073063,0.074656,0.070472,0.073678,0.074668,0.080237,0.069858,0.078484,0.080505,0.078717,0.075833,2.3781,2.3792,2.4138,2.4802,2.3981,2.4465,1.3434,1.2426,1.24,1.2146,1.4222,1.2484,1.0358,1.2665,1.2229,1.2417,0.063889,0.07141,0.077347,0.070817,0.076329,0.070357,0.072407,0.071445,0.062121,0.068375,0.074964,0.065081,0.072611,0.081621,0.069903,0.07435,0.069648,2.4401,2.3853,2.3496,2.4407,2.3153,2.3452,1.3914,1.2989,1.2373,1.4186,1.4365,0.98403,1.1169,1.2123,1.2188,1.3066,0.84927,0.060761,0.076634,0.065559,0.073525,0.074843,0.061947,0.068828,0.076782,0.076463,0.07148,0.064701,0.075213,0.071236,0.093954,0.095589,0.098245,0.077329,2.3506,2.3399,2.4944,2.345,2.2639,2.3927,2.3889,1.22,1.1617,1.3524,1.2205,1.2435,1.1833,1.2363,1.238,1.2902,1.2366,1.2821,0.076698,0.066721,0.074437,0.069904,0.075435,0.076867,0.068662,0.070128,0.068473,0.07503,0.076605,0.097321,0.092842,0.097267,0.092614,0.094473,0.09925,0.064883,2.3636,2.3678,2.3686,2.3813,2.3587,2.4957,2.3619,1.2149,1.1637,1.2399,1.3462,1.1927,1.2358,1.303,1.2051,1.2113,1.2654,0.94727,0.068806,0.07792,0.061351,0.074774,0.073901,0.075132,0.069147,0.066508,0.074478,0.098621,0.09426,0.098882,0.087857,0.091377,0.098361,0.096132,0.09269,0.10076,0.070144,2.4052,2.4208,2.4545,2.4202,2.4324,2.3538,2.3977,1.1483,1.2177,1.2613,0.81083,1.5062,1.1515,1.3746,1.3454,1.2826,1.2619,1.2218,1.1101,0.071114,0.075566,0.06622,0.076043,0.067459,0.07758,0.095555,0.095299,0.097528,0.097096,0.096187,0.095967,0.083181,0.097309,0.098154,0.08594,0.0971,0.095959,2.5441,2.3619,2.4175,2.4423,2.3647,2.3759,2.317,1.2483,1.2251,1.0871,1.2389,1.1312,1.1425,1.2118,1.4939,1.2095,1.3646,1.3518,0.90716,0.079142,0.066412,0.066427,0.093289,0.10202,0.10134,0.086261,0.08889,0.099427,0.095523,0.088517,0.080687,0.10416,0.092406,0.095051,0.096404,0.094424,0.083249,2.2536,2.3715,2.3487,2.422,2.3973,2.462,2.3359,2.4543,2.2839,1.0209,1.2304,0.9963,1.334,1.3197,1.177,1.349,1.0353,1.4456,1.2522,1.3037,0.095087,0.099959,0.0899,0.09991,0.087283,0.084562,0.090849,0.098425,0.094403,0.097535,0.098205,0.097927,0.098947,0.098239,0.097483,0.096254,0.10142,0.10722,2.3216,2.4191,2.4418,2.4098,2.3834,2.4223,2.4552,2.4022,2.3674,1.1751,1.2701,0.93837,0.83691,0.86522,0.95736,0.90503,0.82834,1.0491,0.59534,1.0978,0.097246,0.1033,0.093689,0.10056,0.095383,0.09086,0.096943,0.098664,0.090212,0.092911,0.094782,0.10373,0.10329,0.094745,0.096555,0.098284,0.096225,0.097936,2.3907,2.4265,2.4485,2.4373,2.5669,2.3424,2.4595,2.3607,2.3541,1.2911,0.84845,0.9545,0.88934,0.81796,1.0011,0.92544,0.84468,0.95726,0.88432,0.86716,0.10421,0.097833,0.089156,0.094733,0.099318,0.09532,0.091096,0.098671,0.099491,0.099279,0.09325,0.098594,0.10148,0.10196,0.097967,0.093596,0.098963,0.10019,2.3987,2.3841,2.2967,2.3763,2.4138,2.3845,2.4651,1.2609,1.3118,1.250

7,0.93177,0.97093,0.91741,0.87088,0.88556,0.88938,1.0088,0.60449,0.741  
13,0.84694,0.09186,0.099414,0.09234,0.10356,0.094558,0.090767,0.094681  
,0.097245,0.097043,0.097796,0.099944,0.094684,0.096207,0.093222,0.0962  
7,0.092117,0.091963,0.098493,2.409,2.3944,2.3883,2.4435,2.3873,2.409,1  
.2907,1.2188,1.2552,1.2885,1.2419,0.77641,0.91073,0.85712,0.86755,1.10  
27,0.95243,0.86831,0.95334,0.77835,0.090346,0.10029,0.1032,0.091852,0.  
097937,0.097476,0.099332,0.094406,0.0998,0.096824,0.097935,0.081614,0.  
091926,0.082719,0.094492,0.098867,0.09558,0.089076,2.418,2.4136,2.4456  
,2.3082,2.4033,1.3442,1.3097,1.229,1.1696,1.2005,1.2276,0.82091,0.7821  
7,0.84631,0.91193,0.76036,0.89127,0.94208,0.82853,0.89889,0.094135,0.0  
91492,0.097444,0.09583,0.099882,0.099991,0.10112,0.10035,0.096265,0.10  
107,0.096928,0.087215,0.10084,0.089383,0.090027,0.091603,0.093201,0.09  
4584,2.3019,2.4602,2.3787,1.3698,1.3086,1.0755,1.2875,1.2166,1.3529,1.  
0206,1.3553,0.77775,0.82631,0.83995,0.76725,1.066,0.96233,0.94939,0.74  
748,0.91794,0.099756,0.09654,0.088748,0.10068,0.096427,0.10251,0.09597  
5,0.09363,0.099932,0.090631,0.097887,0.098284,0.094929,0.09125,0.09782  
4,0.095784,0.090543,0.089826,2.39,1.2331,1.1899,1.0707,1.1849,1.212,1.  
2157,1.0283,1.1752,1.1835,0.8796,0.94473,0.6891,0.70076,0.84368,0.7518  
,0.72501,0.9833,0.93475,0.094196,0.095498,0.10104,0.0953,0.091525,0.10  
267,0.097252,0.098222,0.099248,0.096688,0.095323,0.101,0.098379,0.0921  
65,0.099725,0.092178,0.094992,0.12009,1.2549,1.4289,1.4989,1.1029,1.43  
92,1.329,1.2163,1.2671,1.2273,1.2603,0.83123,0.94517,0.84002,0.83907,0  
.67077,0.8727,0.84196,0.86954,0.87131,0.09048,0.09911,0.095324,0.08973  
5,0.10271,0.094627,0.094527,0.1007,0.099835,0.099607,0.096716,0.097194  
,0.094436,0.095248,0.098588,0.097899,0.091176,0.11931,1.2372,1.3761,1.  
3675,1.2358,1.3903,1.324,1.1086,1.2984,1.0529,1.1657,0.91177,0.77364,0  
.97286,0.86143,0.92887,0.89409,0.85853,0.96223,0.080948,0.096699,0.099  
336,0.095083,0.095764,0.097951,0.088963,0.097408,0.094077,0.089793,0.0  
97414,0.10229,0.086583,0.096675,0.097188,0.095789,0.095554,0.096665,0.  
1199,1.1834,1.197,1.3187,1.4989,1.1891,1.2074,1.0935,1.2851,1.1141,1.3  
107,0.92248,0.86287,0.94656,0.7971,0.72644,0.80425,0.9046,0.86638,0.09  
2779,0.10677,0.099489,0.095119,0.095592,0.095926,0.094527,0.091747,0.0  
92485,0.10008,0.099022,0.093188,0.10019,0.095239,0.098499,0.08879,0.09  
316,0.11817,0.12685,0.12896,1.2017,1.2465,1.2597,0.99416,1.2427,0.9186  
9,1.2402,1.4122,1.2275,0.69723,0.87057,0.86222,0.87427,0.85519,0.79993  
,0.09306,0.098312,0.091214,0.096128,0.09759,0.099382,0.093343,0.095658  
,0.093947,0.10132,0.094842,0.10349,0.095639,0.09398,0.10703,0.093638,0  
.093727,0.096748,0.11938,0.11588,0.12595,0.11667,1.2383,1.275,1.1802,1  
.2133,0.98859,1.0981,0.9022,1.3099,1.2545,0.91011,0.9813,0.98266,0.100  
69,0.089528,0.090921,0.095793,0.09451,0.097234,0.093906,0.095922,0.090  
475,0.0944,0.094173,0.096034,0.10748,0.087744,0.096565,0.10374,0.09884  
9,0.097968,0.099978,0.094921,0.12333,0.11949,0.11842,0.11839,0.11549,0  
.12189,1.0472,1.2142,1.012,1.1194,1.3121,1.0722,1.2548,1.2438,0.096198  
,0.095484,0.10597,0.09948,0.094099,0.094185,0.097415,0.098164,0.098145  
,0.086181,0.08937,0.094172,0.090773,0.090038,0.086166,0.09562,0.094758  
,0.096615,0.096705,0.097853,0.090121,0.090724,0.094565,0.12635,0.11354  
,0.12313,0.11444,0.11686,0.11744,1.4075,1.321,1.394,1.4406,1.2512,0.12  
258,0.12173,0.097782,0.092455,0.097728,0.093921,0.098614,0.10323,0.093  
979,0.096758,0.099789,0.10341,0.09174,0.095248,0.095852,0.092926,0.093  
193,0.09528,0.095079,0.096114,0.093177,0.10728,0.098681,0.12184,0.1156  
9,0.11939,0.11844,0.11969,0.117,0.12674,0.12779,0.11886,0.11922,1.0649  
,1.3428,0.11556,0.11534,0.12296,0.12162,0.096787,0.093368,0.095534,0.0

93002,0.095635,0.093023,0.098028,0.10114,0.091899,0.098605,0.092629,0.09732,0.10336,0.096476,0.097251,0.090153,0.095721,0.092864,0.0923,0.11571,0.124,0.11792,0.12473,0.12329,0.11992,0.11266,0.12583,0.11637,0.12702,0.11426,0.13009,0.11858,0.11488,0.11908,0.12582,0.11761,0.090521,0.1029,0.092743,0.10025,0.094322,0.098002,0.089186,0.096372,0.094578,0.095156,0.094326,0.093492,0.098166,0.092869,0.094736,0.092985,0.11692,0.12529,0.1218,0.1228,0.11633,0.11109,0.11726,0.11429,0.12199,0.11981,0.11926,0.11444,0.11971,0.11778,0.12017,0.11649,0.12042,0.11579,0.12475,0.09667,0.10512,0.095925,0.098355,0.097746,0.094337,0.09487,0.094219,0.092972,0.095813,0.095404,0.091611,0.093114,0.12193,0.11338,0.12237,0.11702,0.11919,0.11378,0.11734,0.12113,0.12132,0.11533,0.12688,0.11061,0.11442,0.11422,0.11692,0.11356,0.12132,0.11218,0.12152,0.12894,0.11748,0.094951,0.088865,0.093237,0.099783,0.093009,0.092101,0.093513,0.094248,0.092836,0.12071,0.12294,0.12241,0.11378,0.11118,0.12571,0.12006,0.12074,0.12542,0.11754,0.12419,0.11765,0.1183,0.12878,0.11865,0.11943,0.11821,0.11775,0.12299,0.12057,0.11552,0.12062,0.12402,0.12185,0.12463,0.1008,0.10094,0.09796,0.096366,0.11592,0.11875,0.12036,0.11503,0.12235,0.11779,0.1071,0.10991,0.12016,0.11471,0.12909,0.11958,0.11741,0.11836,0.11429,0.11685,0.11536,0.1154,0.11374,0.12359,0.12005,0.11502,0.11648,0.11701,0.11434,0.11947,0.11308,0.11557,0.12424,0.11673,0.119,0.12107,0.12236,0.11641,0.12086,0.12,0.11759,0.11754,0.12155,0.11579,0.11678,0.12175,0.12256,0.11574,0.11955,0.12535,0.1204,0.11553,0.11918,0.11833,0.11995,0.11846,0.12294,0.11407,0.11783,0.11755,0.12118,0.12016,0.12657,0.11318,0.11851,0.1149,0.11317,0.12037,0.11984,0.1203,0.11479,0.11702,0.11959,0.1191,0.11833,0.12276,0.12391,0.11807,0.11718,0.1126,0.12728,0.11502,0.11467,0.12057,0.11944,0.12183,0.12467,0.12953,0.12431,0.1231,0.11631,0.1173,0.12388,0.12137,0.1212,0.11213,0.12008,0.11723,0.11892,0.12436,0.12194,0.12127,0.12213,0.11776,0.12208,0.10899,0.12241,0.1181,0.11872,0.12309,0.11832,0.12655,0.11962,0.11699,0.12115,0.1181,0.11757,0.11517,0.11862,0.11474,0.12791,0.11204,0.11478,0.11726,0.11753,0.11436,0.12005,0.12265,0.11982,0.12354,0.1256,0.12998,0.1202,0.1229,0.12485,0.12229,0.11694,0.12379,0.1165,0.12124,0.12038,0.119,0.11366,0.12024,0.12213,0.12031,0.11703,0.1239,0.11655,0.1222,0.11785,0.11956,0.11438,0.11809,0.12197,0.12073,0.11969,0.11293,0.11723,0.1241,0.12096,0.12184,0.12101,0.12148,0.12057,0.11299,0.12267,0.11833,0.11884,0.12521,0.11348,0.12149,0.11746,0.11887,0.12587,0.11975,0.12054,0.11905,0.12127,0.12263,0.11781,0.11966,0.11859,0.1163,0.12467,0.12309,0.11315,0.11986,0.11883,0.12209,0.11929,0.11924,0.1162,0.13107,0.11923,0.12326,0.12231,0.11318,0.11408

0.11849,0.11846,0.11394,0.12044,0.11137,0.10535,0.12278,0.11007,0.11834,0.11268,0.12327,0.1146,0.10986,0.12553,0.11543,0.12143,0.11084,0.1155,0.12238,0.11955,0.89443,0.89815,0.96844,0.8256,0.10962,0.10745,0.12822,0.11622,0.11982,0.11287,0.11868,0.12275,0.11826,0.12084,0.1199,0.11574,0.11934,0.12048,0.10736,1.5206,0.94563,0.7879,0.96656,0.76624,0.85437,0.96519,0.11062,0.11473,0.12671,0.11961,0.10916,0.11642,0.11695,0.11641,0.11258,0.10901,0.11955,0.12056,0.11415,0.10037,0.11481,1.5498,1.5526,0.90657,1.0653,0.8721,0.87184,0.86893,0.91592,0.73807,0.68195,0.11569,0.11377,0.10762,0.11721,0.11119,0.11902,0.11367,0.11806,0.11766,0.11893,0.099617,0.1145,0.11463,0.11171,0.123,1.5946,1.5424,1.5279,0.86242,0.78232,0.67028,0.66924,0.93726,0.91313,0.82368,0.74236,0.94444,0.10984,0.1297,0.12457,0.12739,0.12588,0.11483,0.11478,0.10849,0.11077,0.11829,0.11061,0.12578,0.1193,0.10229,0.12073,0.11042,1.5969,1.4719,1

.6443,1.4834,0.96056,0.9571,0.95891,0.84583,0.82633,0.50896,0.81472,0.85885,1.054,0.82905,0.11785,0.1115,0.10682,0.11495,0.1199,0.11342,0.1164,0.11298,0.1186,0.12141,0.12627,0.11784,0.1194,0.12361,0.1196,0.12038,1.6099,1.606,1.6191,1.6482,1.5976,1.6519,0.92862,0.88888,0.84943,0.8524,0.99293,0.87186,0.73463,0.88639,0.82189,0.83592,0.10807,0.11348,0.1249,0.11565,0.12032,0.11526,0.1138,0.11688,0.10626,0.11401,0.11637,0.11205,0.11942,0.12476,0.10774,0.1191,0.11537,1.7005,1.5837,1.5845,1.6553,1.5534,1.618,0.94673,0.90513,0.85597,0.97077,0.97043,0.69516,0.767,0.86001,0.85364,0.90985,0.61314,0.10426,0.12135,0.10698,0.1171,0.11318,0.10985,0.10846,0.12071,0.11809,0.11777,0.10873,0.11651,0.11247,0.12903,0.13338,0.13044,0.1182,1.5592,1.5514,1.7345,1.514,1.4351,1.607,1.641,0.84872,0.7763,0.92899,0.85715,0.86607,0.83015,0.86864,0.85894,0.88513,0.86401,0.89749,0.1176,0.11479,0.11917,0.11714,0.11869,0.12319,0.11467,0.11562,0.11303,0.11902,0.1211,0.1298,0.12997,0.13293,0.12994,0.12693,0.13353,0.11365,1.5632,1.5857,1.5644,1.5882,1.5885,1.6923,1.6137,0.84355,0.81714,0.8559,0.91823,0.78189,0.85678,0.9108,0.82492,0.81655,0.89105,0.67017,0.11598,0.12071,0.10554,0.1191,0.11757,0.11737,0.11563,0.11088,0.12259,0.13316,0.13035,0.1359,0.12389,0.12965,0.13053,0.13465,0.12742,0.13529,0.11496,1.6451,1.645,1.6997,1.6351,1.5933,1.5517,1.6057,0.82844,0.84842,0.87839,0.59383,1.0571,0.7749,0.94366,0.93939,0.88059,0.88801,0.84031,0.80024,0.11422,0.11867,0.11125,0.11769,0.11323,0.12142,0.12859,0.13215,0.13454,0.13278,0.13181,0.13054,0.12022,0.12986,0.1325,0.12094,0.13163,0.13087,1.7482,1.5631,1.6073,1.6572,1.6078,1.5645,1.4913,0.87989,0.84938,0.756,0.83726,0.79587,0.79918,0.83115,1.0024,0.83953,0.95954,0.96223,0.6479,0.11952,0.10864,0.11011,0.12837,0.13863,0.13513,0.1245,0.12592,0.13493,0.12944,0.12648,0.12131,0.13354,0.12881,0.13174,0.13107,0.12796,0.11999,1.4562,1.5624,1.5963,1.6448,1.6269,1.6421,1.5234,1.6782,1.5292,0.72472,0.83829,0.69432,0.95307,0.91389,0.80715,0.91757,0.72117,1.0244,0.88216,0.93582,0.12885,0.13361,0.12831,0.13236,0.12363,0.12262,0.12846,0.13181,0.12865,0.13309,0.13245,0.13227,0.13469,0.13151,0.13189,0.13308,0.13467,0.13849,1.5746,1.6174,1.6586,1.621,1.5516,1.6325,1.6701,1.625,1.5873,0.80692,0.90768,0.67078,0.58819,0.6193,0.69013,0.67573,0.58881,0.73308,0.44676,0.78093,0.13215,0.13703,0.12983,0.13426,0.12935,0.12678,0.12904,0.13374,0.13019,0.1282,0.13186,0.13975,0.13685,0.13152,0.13155,0.13164,0.13264,0.13171,1.6085,1.6475,1.657,1.6785,1.7484,1.5929,1.6704,1.5941,1.5919,0.91365,0.61395,0.68644,0.63185,0.58938,0.69154,0.65976,0.60186,0.68839,0.64708,0.63515,0.13814,0.13294,0.12343,0.12837,0.13231,0.12896,0.12833,0.13477,0.13497,0.13284,0.12575,0.13245,0.13585,0.13679,0.13146,0.12711,0.13161,0.13153,1.5937,1.5575,1.4854,1.5633,1.6215,1.5859,1.6953,0.88401,0.91812,0.86035,0.66481,0.6909,0.67226,0.6142,0.64078,0.63706,0.7105,0.46335,0.53752,0.60061,0.12633,0.13281,0.12835,0.13576,0.12942,0.12887,0.12762,0.13234,0.13043,0.13139,0.13233,0.13057,0.12954,0.12974,0.13116,0.12688,0.12865,0.13503,1.611,1.6325,1.6041,1.6431,1.5661,1.6575,0.89854,0.83929,0.85464,0.88326,0.86332,0.57315,0.65455,0.61843,0.60463,0.77748,0.69063,0.62125,0.68137,0.56895,0.12727,0.1312,0.13825,0.12954,0.13327,0.13282,0.1349,0.1292,0.13257,0.1322,0.1322,0.11978,0.12812,0.12174,0.12929,0.13512,0.13137,0.12623,1.6622,1.6428,1.612,1.5285,1.6193,0.9314,0.90644,0.85123,0.8136,0.82008,0.85381,0.59134,0.55854,0.61134,0.64713,0.55871,0.64435,0.68524,0.59931,0.64529,0.12766,0.1299,0.13249,0.13156,0.13525,0.13484,0.13459,0.13413,0.13071,0.13725,0.13306,0.12721,0.13483,0.12677,0.12757,0.12661,0.12867,0.12856,1.5014,1.6929,1.6058,0.952

9,0.92129,0.76047,0.91173,0.85077,0.94927,0.69315,0.9688,0.5564,0.5995  
6,0.60222,0.5727,0.73075,0.69572,0.67248,0.54691,0.68595,0.13279,0.132  
41,0.12627,0.13364,0.13349,0.13711,0.13029,0.12929,0.13451,0.12671,0.1  
361,0.13269,0.13127,0.1263,0.13283,0.13047,0.1258,0.12554,1.5271,0.856  
81,0.83779,0.77446,0.80921,0.81755,0.84926,0.72423,0.81441,0.80777,0.6  
4017,0.66274,0.49878,0.51027,0.61404,0.55528,0.5273,0.71595,0.69573,0.  
12899,0.13228,0.13612,0.12963,0.12668,0.13347,0.13213,0.13466,0.13154,  
0.12949,0.12994,0.13252,0.13235,0.12834,0.13169,0.12607,0.12989,0.1457  
,0.8875,0.98167,1.0514,0.78452,1.0067,0.93291,0.82367,0.88814,0.87796,  
0.87488,0.58936,0.6716,0.59858,0.58704,0.50239,0.62323,0.59801,0.63194  
,0.6285,0.126,0.13389,0.1281,0.12495,0.13708,0.131,0.13085,0.13612,0.1  
3412,0.13646,0.13089,0.13264,0.13117,0.13219,0.13543,0.13333,0.1267,0.  
14582,0.85389,0.92852,0.94432,0.84554,0.97012,0.91498,0.751,0.9011,0.7  
3375,0.81315,0.66094,0.5556,0.71339,0.61662,0.6702,0.63922,0.61439,0.6  
7494,0.11942,0.13178,0.1333,0.12947,0.13019,0.13393,0.12306,0.13434,0.  
12937,0.12802,0.13285,0.13697,0.12319,0.13198,0.13169,0.13173,0.12956,  
0.13378,0.14631,0.83481,0.85014,0.93149,1.0201,0.84576,0.82242,0.77455  
,0.89286,0.79846,0.92357,0.64605,0.62315,0.68813,0.56651,0.5486,0.5995  
3,0.66503,0.62682,0.12771,0.13816,0.13474,0.12961,0.1306,0.1322,0.1275  
4,0.12716,0.12813,0.13322,0.136,0.12679,0.13548,0.13284,0.13439,0.1251  
9,0.12793,0.14491,0.15281,0.1535,0.82831,0.84649,0.86367,0.71699,0.863  
54,0.64539,0.8606,0.96647,0.86415,0.50499,0.64111,0.62355,0.64793,0.61  
505,0.56452,0.1292,0.13386,0.12731,0.13151,0.13382,0.1331,0.13032,0.12  
972,0.13236,0.1355,0.12958,0.13715,0.13078,0.12921,0.13732,0.12857,0.1  
2957,0.13064,0.1442,0.13873,0.15117,0.1436,0.86976,0.85285,0.82236,0.8  
3741,0.70252,0.78501,0.64247,0.8686,0.90114,0.63571,0.70195,0.7037,0.1  
3514,0.12741,0.12593,0.12853,0.13216,0.13044,0.13104,0.12995,0.13003,0  
.13222,0.12889,0.13171,0.14053,0.12469,0.13283,0.13758,0.13284,0.13345  
,0.13355,0.12829,0.14612,0.14504,0.14318,0.14314,0.14148,0.14509,0.711  
12,0.83334,0.68642,0.77062,0.91447,0.7558,0.87659,0.88204,0.13041,0.12  
913,0.13728,0.13746,0.13089,0.13022,0.13294,0.13134,0.13254,0.12401,0.  
12637,0.13017,0.12652,0.1287,0.1251,0.12929,0.12966,0.13206,0.13079,0.  
13443,0.12672,0.12909,0.13374,0.14985,0.13911,0.15228,0.13858,0.14377,  
0.1436,0.9348,0.91421,0.96677,1.008,0.86871,0.14861,0.14723,0.13107,0.  
1291,0.12984,0.12973,0.13359,0.13794,0.12639,0.13191,0.13335,0.13809,0  
.1287,0.13086,0.12788,0.13072,0.12792,0.13174,0.1307,0.1321,0.12809,0.  
13914,0.13383,0.14774,0.14153,0.14722,0.14485,0.1472,0.1462,0.15443,0.  
15325,0.14535,0.14996,0.73102,0.93724,0.14348,0.14119,0.14565,0.14578,  
0.1329,0.12854,0.12997,0.12868,0.1298,0.12971,0.13009,0.13627,0.12879,  
0.13056,0.1281,0.13247,0.13905,0.13013,0.1344,0.12811,0.13296,0.13054,  
0.12818,0.14328,0.14835,0.14114,0.15031,0.14687,0.14596,0.13898,0.1531  
2,0.14294,0.15008,0.14181,0.15454,0.14332,0.13956,0.14454,0.1499,0.141  
38,0.12592,0.13908,0.12935,0.13452,0.1308,0.13095,0.12652,0.13059,0.12  
75,0.13166,0.13012,0.12972,0.13418,0.12985,0.12929,0.12999,0.14242,0.1  
5126,0.15019,0.14871,0.1431,0.14058,0.14256,0.14268,0.14889,0.14777,0.  
14623,0.13862,0.14489,0.14389,0.14787,0.14165,0.14442,0.14221,0.14947,  
0.13189,0.14048,0.1319,0.13533,0.13309,0.13174,0.12907,0.13039,0.12885  
,0.13193,0.12994,0.12766,0.12623,0.14548,0.1404,0.1462,0.14265,0.14449  
,0.14042,0.1406,0.146,0.15185,0.13889,0.15152,0.13525,0.14182,0.13987,  
0.14357,0.14126,0.14821,0.13743,0.14405,0.15438,0.14446,0.13065,0.1260  
4,0.12864,0.13506,0.12993,0.12767,0.12895,0.13034,0.12886,0.14572,0.14  
616,0.14737,0.13931,0.13803,0.15153,0.14746,0.14761,0.14895,0.14376,0.

15056,0.14625,0.1422,0.1557,0.1448,0.14444,0.14848,0.1475,0.14799,0.14  
295,0.14168,0.14827,0.15147,0.14825,0.15189,0.13755,0.13652,0.13286,0.  
13146,0.13887,0.14777,0.14767,0.14256,0.14558,0.14721,0.13255,0.13435,  
0.14532,0.14105,0.15316,0.1448,0.14245,0.14255,0.14133,0.14553,0.1433,  
0.14183,0.13976,0.15138,0.1446,0.1401,0.14278,0.1428,0.14169,0.14666,0.  
.13789,0.14179,0.15226,0.14332,0.14374,0.14524,0.14868,0.14285,0.14636  
,0.14489,0.14515,0.14397,0.14745,0.13929,0.14253,0.14628,0.14648,0.139  
82,0.14461,0.15034,0.14826,0.14299,0.14808,0.14635,0.14404,0.14323,0.1  
4834,0.13914,0.14522,0.14487,0.14643,0.1474,0.15051,0.14087,0.14487,0.  
14066,0.13887,0.14553,0.14465,0.14383,0.14368,0.14412,0.14464,0.14789,  
0.14225,0.14993,0.14966,0.14418,0.1428,0.1421,0.15613,0.14052,0.14134,  
0.14493,0.14587,0.14604,0.14754,0.15215,0.14731,0.14718,0.13912,0.1438  
4,0.14987,0.14699,0.14875,0.14015,0.14695,0.1441,0.14655,0.15002,0.151  
84,0.14664,0.14642,0.14454,0.14771,0.13256,0.14604,0.14725,0.14668,0.1  
5005,0.14584,0.14929,0.14353,0.1447,0.14564,0.14418,0.14565,0.14036,0.  
14538,0.14444,0.15274,0.13704,0.14412,0.14131,0.14554,0.14232,0.14611,  
0.14402,0.1466,0.14967,0.1513,0.15685,0.14694,0.1472,0.14895,0.14727,0.  
.1455,0.14763,0.14237,0.14678,0.14747,0.14466,0.13909,0.14467,0.14958,  
0.14725,0.14226,0.15185,0.14475,0.14971,0.14464,0.14312,0.1405,0.14617  
,0.14758,0.14688,0.14322,0.13673,0.14286,0.14718,0.14659,0.14666,0.145  
76,0.15155,0.14663,0.13986,0.14831,0.14414,0.14538,0.15218,0.13912,0.1  
4751,0.14192,0.14522,0.14854,0.14254,0.14712,0.1447,0.14713,0.14743,0.  
14145,0.14547,0.14571,0.14632,0.14845,0.14712,0.13907,0.14692,0.14501,  
0.14763,0.1433,0.14348,0.139,0.15639,0.14438,0.14801,0.15109,0.14036,0.  
.1422  
0.1414,0.14512,0.14455,0.144,0.13913,0.13013,0.1526,0.13605,0.14332,0.  
13845,0.15428,0.14349,0.13614,0.15097,0.14477,0.14587,0.13563,0.14127,  
0.15325,0.15118,0.65103,0.69043,0.72701,0.59662,0.13816,0.13721,0.1589  
8,0.14038,0.1452,0.14181,0.14567,0.15022,0.1467,0.14682,0.15062,0.1471  
2,0.14236,0.1502,0.13647,1.0334,0.68,0.58108,0.72974,0.55168,0.64679,0.  
.70012,0.13854,0.14163,0.15261,0.15094,0.13567,0.14312,0.14414,0.14057  
,0.14072,0.13575,0.1477,0.14856,0.1425,0.13161,0.14354,1.0963,1.0757,0.  
.66757,0.77604,0.65333,0.64029,0.65312,0.6733,0.54653,0.52043,0.13991,  
0.14041,0.13372,0.14471,0.1389,0.14427,0.14077,0.14024,0.14478,0.14547  
,0.13007,0.145,0.14227,0.14047,0.15123,1.1041,1.0644,1.0631,0.61338,0.  
58192,0.48334,0.50585,0.69218,0.6932,0.597,0.54553,0.63856,0.13781,0.1  
5633,0.14898,0.15502,0.15389,0.1451,0.14334,0.13509,0.13819,0.14813,0.  
13853,0.15126,0.14506,0.12798,0.14811,0.13906,1.1427,0.99738,1.152,1.0  
311,0.688,0.67741,0.71152,0.62514,0.63192,0.40107,0.61507,0.6436,0.759  
83,0.61244,0.14483,0.14122,0.13191,0.14159,0.1464,0.14577,0.14425,0.13  
794,0.14571,0.1479,0.15387,0.14434,0.1463,0.1538,0.14297,0.14791,1.178  
5,1.1748,1.13,1.155,1.1149,1.2089,0.7109,0.6423,0.636,0.60003,0.72782,  
0.6527,0.54766,0.6464,0.58914,0.59394,0.13731,0.14211,0.1519,0.148,0.1  
4664,0.14649,0.14135,0.14436,0.1352,0.14411,0.14309,0.14005,0.14526,0.  
153,0.13232,0.14799,0.1421,1.1758,1.1198,1.1423,1.1579,1.1243,1.1693,0.  
.68837,0.6807,0.61634,0.72146,0.69023,0.51843,0.55115,0.64644,0.62334,  
0.66713,0.46945,0.13469,0.1484,0.13867,0.14334,0.14255,0.13981,0.13609  
,0.14476,0.14537,0.1443,0.14187,0.14543,0.14405,0.13793,0.14407,0.1417  
6,0.14779,1.0999,1.0628,1.2154,1.078,0.99241,1.1302,1.1862,0.60834,0.5  
5263,0.68833,0.63451,0.61559,0.62288,0.65137,0.64885,0.65078,0.63503,0.  
.67179,0.14532,0.14162,0.14909,0.14292,0.14608,0.14638,0.13975,0.14781  
,0.14078,0.14769,0.1471,0.14104,0.13985,0.14193,0.14293,0.13812,0.1425

2, 0.13711, 1.0646, 1.1077, 1.1016, 1.1197, 1.0684, 1.2403, 1.1563, 0.63472, 0.59836, 0.63411, 0.67534, 0.57095, 0.6174, 0.65448, 0.62909, 0.57773, 0.66267, 0.50963, 0.14394, 0.1487, 0.13787, 0.15025, 0.14732, 0.14418, 0.14145, 0.14025, 0.15074, 0.14067, 0.14061, 0.13994, 0.13366, 0.14155, 0.13586, 0.1448, 0.13617, 0.14582, 0.1425, 1.1423, 1.1726, 1.2371, 1.154, 1.0872, 1.048, 1.0965, 0.62108, 0.62845, 0.65279, 0.44943, 0.78561, 0.54934, 0.68199, 0.65294, 0.62549, 0.63792, 0.63193, 0.58615, 0.1445, 0.14501, 0.14159, 0.14066, 0.1393, 0.14715, 0.13916, 0.14164, 0.14218, 0.14119, 0.14001, 0.13629, 0.13448, 0.13776, 0.14445, 0.13003, 0.13832, 0.14158, 1.2444, 1.0826, 1.1426, 1.2107, 1.1561, 1.1218, 1.0585, 0.66416, 0.63859, 0.55462, 0.59247, 0.58117, 0.58673, 0.61597, 0.72112, 0.61693, 0.695, 0.71827, 0.48434, 0.14871, 0.1338, 0.13946, 0.13676, 0.14716, 0.1456, 0.13535, 0.13446, 0.14039, 0.13462, 0.13912, 0.13664, 0.13735, 0.13782, 0.14515, 0.13815, 0.13602, 0.13457, 1.016, 1.0738, 1.1223, 1.1559, 1.1636, 1.1815, 1.0651, 1.1894, 1.0369, 0.53643, 0.61222, 0.50786, 0.70297, 0.69624, 0.55925, 0.64402, 0.52096, 0.76645, 0.64343, 0.69578, 0.13838, 0.13906, 0.14175, 0.13619, 0.13496, 0.13525, 0.13903, 0.14211, 0.13759, 0.14168, 0.14032, 0.14031, 0.14068, 0.14009, 0.14202, 0.14562, 0.14109, 0.14204, 1.0636, 1.141, 1.1741, 1.1212, 1.0667, 1.195, 1.1752, 1.1593, 1.0928, 0.5823, 0.66513, 0.50968, 0.44614, 0.46973, 0.50803, 0.52211, 0.45189, 0.54618, 0.35685, 0.57439, 0.14015, 0.13861, 0.14127, 0.14031, 0.13851, 0.13488, 0.14031, 0.14131, 0.14068, 0.13692, 0.14327, 0.14524, 0.14566, 0.13969, 0.14314, 0.14173, 0.14261, 0.1418, 1.1483, 1.151, 1.1866, 1.2244, 1.2445, 1.1093, 1.1848, 1.16, 1.1138, 0.66593, 0.44271, 0.50668, 0.47234, 0.44098, 0.50443, 0.4913, 0.43678, 0.51815, 0.49973, 0.48404, 0.14653, 0.13913, 0.13345, 0.13778, 0.13887, 0.13849, 0.13721, 0.14286, 0.14219, 0.13795, 0.1341, 0.14068, 0.13896, 0.13954, 0.14067, 0.13687, 0.13507, 0.13977, 1.1285, 1.0892, 0.98477, 1.0979, 1.1378, 1.1312, 1.2587, 0.62622, 0.6659, 0.64175, 0.48305, 0.5087, 0.50589, 0.4696, 0.48064, 0.46583, 0.52887, 0.36681, 0.40879, 0.45112, 0.13521, 0.14407, 0.13915, 0.14071, 0.13752, 0.13941, 0.13776, 0.13871, 0.13782, 0.13877, 0.1425, 0.14063, 0.13913, 0.13856, 0.13899, 0.14002, 0.13883, 0.14544, 1.1163, 1.1735, 1.0892, 1.1878, 1.0809, 1.1613, 0.64843, 0.597, 0.60935, 0.63232, 0.60711, 0.44007, 0.4985, 0.47706, 0.45927, 0.56506, 0.50714, 0.46056, 0.51613, 0.41988, 0.14028, 0.13859, 0.14479, 0.14061, 0.13999, 0.14007, 0.14201, 0.13942, 0.1405, 0.14285, 0.14255, 0.13261, 0.13888, 0.13663, 0.13747, 0.14169, 0.13899, 0.13817, 1.171, 1.1428, 1.1654, 1.0907, 1.1094, 0.686, 0.66373, 0.62906, 0.58171, 0.57994, 0.61283, 0.43645, 0.43481, 0.45556, 0.47907, 0.42536, 0.4829, 0.51482, 0.46182, 0.46822, 0.13886, 0.14589, 0.14247, 0.14043, 0.14511, 0.14225, 0.14676, 0.14067, 0.13986, 0.14607, 0.14172, 0.13991, 0.14195, 0.13582, 0.14227, 0.13681, 0.13595, 0.13548, 1.0384, 1.2147, 1.1641, 0.68324, 0.67308, 0.55172, 0.66975, 0.6162, 0.67097, 0.52734, 0.71152, 0.42846, 0.44998, 0.45308, 0.43873, 0.49917, 0.51087, 0.50862, 0.41932, 0.52802, 0.14085, 0.13827, 0.13845, 0.13991, 0.14413, 0.14087, 0.13816, 0.13727, 0.13761, 0.13623, 0.1472, 0.1433, 0.14178, 0.13842, 0.14169, 0.14097, 0.13738, 0.13512, 1.0689, 0.62756, 0.64092, 0.5592, 0.54719, 0.58468, 0.61519, 0.50258, 0.5563, 0.573, 0.48964, 0.48963, 0.37609, 0.39324, 0.46207, 0.41531, 0.39778, 0.53087, 0.52827, 0.13943, 0.14188, 0.14375, 0.13836, 0.13575, 0.13743, 0.1397, 0.14347, 0.14026, 0.13757, 0.13811, 0.13989, 0.13896, 0.13694, 0.142, 0.13652, 0.14078, 0.13765, 0.65327, 0.70604, 0.74562, 0.56123, 0.73307, 0.66687, 0.56481, 0.65929, 0.6304, 0.59897, 0.43946, 0.49977, 0.45851, 0.44609, 0.39125, 0.4666, 0.46285, 0.50182, 0.46526, 0.13525, 0.14213, 0.14072, 0.13622, 0.14125, 0.14319, 0.13974, 0.14125, 0.14134, 0.14426, 0.13998, 0.14375, 0.13924, 0.14094, 0.14428, 0.14169, 0.13396, 0.13465, 0.60426, 0.67537, 0.66538, 0.59761, 0.72847, 0.65508, 0.54487, 0.64651, 0.54712, 0.60667, 0.50039, 0.43179, 0.53117, 0.48244, 0.51835, 0.48464, 0.44967, 0



.5087,0.13589,0.14129,0.14202,0.14252,0.13556,0.14492,0.13394,0.14312,  
0.13795,0.14201,0.14093,0.14538,0.13253,0.14208,0.13964,0.14082,0.1399  
7,0.14133,0.13665,0.62262,0.62496,0.67507,0.74187,0.63161,0.5948,0.564  
6,0.63509,0.59179,0.65483,0.49036,0.47434,0.5258,0.4274,0.43235,0.4673  
5,0.50134,0.47648,0.13701,0.14642,0.14467,0.13806,0.13964,0.14139,0.13  
595,0.13553,0.13807,0.14167,0.14545,0.13713,0.14295,0.14396,0.14074,0.  
13627,0.13627,0.13791,0.14287,0.14499,0.57645,0.60729,0.61015,0.52483,  
0.61131,0.48291,0.59684,0.65531,0.62747,0.38546,0.48161,0.49477,0.4915  
8,0.46033,0.42801,0.14029,0.14177,0.13621,0.14378,0.14358,0.13882,0.14  
262,0.14124,0.13928,0.14095,0.13755,0.14228,0.14122,0.13666,0.13896,0.  
1382,0.13877,0.13748,0.1358,0.13167,0.13919,0.13194,0.59655,0.62241,0.  
58328,0.60768,0.52016,0.57418,0.47896,0.59823,0.65649,0.49208,0.52202,  
0.51598,0.14164,0.14286,0.13909,0.13629,0.14208,0.13635,0.13956,0.1399  
1,0.14082,0.14249,0.13869,0.14286,0.14354,0.13561,0.14021,0.1424,0.142  
82,0.13614,0.14153,0.13576,0.13771,0.13154,0.13309,0.13199,0.13188,0.1  
3538,0.53326,0.59653,0.49435,0.54578,0.66447,0.55093,0.6389,0.63402,0.  
14044,0.13678,0.14044,0.14793,0.14122,0.13909,0.13963,0.14027,0.14279,  
0.13837,0.13602,0.14102,0.13978,0.13948,0.13706,0.13708,0.13915,0.1416  
7,0.1411,0.14235,0.13649,0.14292,0.14291,0.13907,0.13023,0.14652,0.128  
51,0.13615,0.13471,0.65738,0.66381,0.69953,0.70835,0.63702,0.13967,0.1  
3427,0.13986,0.1366,0.13565,0.1406,0.14106,0.14556,0.1331,0.14102,0.14  
132,0.14471,0.13953,0.13661,0.13546,0.14177,0.13979,0.14342,0.14114,0.  
14009,0.13736,0.14215,0.14343,0.14052,0.13143,0.13809,0.1333,0.13882,0  
.13828,0.14438,0.14166,0.13551,0.14254,0.54111,0.67726,0.13384,0.12974  
,0.13883,0.1348,0.13904,0.13723,0.13876,0.1368,0.13471,0.13757,0.13854  
,0.1429,0.1385,0.13704,0.13836,0.14023,0.14388,0.13547,0.1405,0.14025,  
0.14228,0.14167,0.1391,0.13636,0.13866,0.13161,0.14294,0.136,0.13254,0  
.12997,0.14776,0.13352,0.13786,0.13409,0.14333,0.13329,0.12892,0.13434  
,0.14,0.13207,0.13689,0.14602,0.13899,0.1449,0.13762,0.13834,0.13664,0  
.14049,0.13644,0.13916,0.14146,0.1375,0.14408,0.13846,0.13473,0.13961,  
0.13051,0.14203,0.14101,0.13869,0.13471,0.13117,0.13552,0.13189,0.1382  
5,0.13707,0.13627,0.12989,0.1373,0.13186,0.13754,0.13051,0.13611,0.135  
74,0.13792,0.14534,0.14593,0.1417,0.14265,0.13816,0.1441,0.13838,0.139  
06,0.14138,0.14001,0.14002,0.13579,0.13663,0.13813,0.13089,0.13677,0.1  
3542,0.13627,0.13391,0.13119,0.13145,0.14303,0.12823,0.13818,0.12783,0  
.12968,0.13322,0.13362,0.13038,0.1384,0.12854,0.13574,0.14312,0.13493,  
0.13787,0.13789,0.13817,0.14266,0.14592,0.1371,0.14069,0.14042,0.13967  
,0.13624,0.13648,0.13964,0.13044,0.13156,0.14188,0.1388,0.13757,0.1381  
4,0.1366,0.1392,0.13768,0.13475,0.14649,0.13462,0.13566,0.13772,0.1383  
2,0.14028,0.13071,0.13168,0.1417,0.14109,0.13618,0.14057,0.14607,0.142  
12,0.14132,0.14265,0.12816,0.13771,0.13799,0.13352,0.13469,0.13715,0.1  
2486,0.12466,0.13999,0.13325,0.14443,0.13649,0.13177,0.1312,0.13153,0.  
13319,0.13749,0.13313,0.13026,0.14412,0.13335,0.13233,0.13459,0.13007,  
0.13232,0.1356,0.13084,0.12936,0.14271,0.13363,0.1351,0.13418,0.14047,  
0.13228,0.13687,0.13454,0.13572,0.13374,0.13785,0.12786,0.13612,0.1347  
4,0.13664,0.1309,0.13407,0.13986,0.13636,0.13351,0.13768,0.13672,0.138  
45,0.1344,0.13943,0.13053,0.13523,0.13622,0.13701,0.14121,0.14041,0.13  
437,0.13965,0.13532,0.12821,0.13501,0.13447,0.13625,0.13356,0.13316,0.  
13605,0.13853,0.13089,0.14165,0.13781,0.13825,0.13457,0.13271,0.14625,  
0.13258,0.13474,0.13352,0.13928,0.13913,0.14012,0.14119,0.13729,0.1368  
6,0.12957,0.13248,0.13843,0.13616,0.13615,0.1297,0.13477,0.13288,0.137  
05,0.14135,0.14059,0.13642,0.13496,0.1357,0.13992,0.12303,0.13818,0.13

546,0.13178,0.14055,0.13591,0.14008,0.13591,0.13703,0.13603,0.13586,0.13807,0.13134,0.13414,0.13594,0.14124,0.12605,0.13571,0.12963,0.13787,0.13152,0.13751,0.13321,0.13675,0.13944,0.1408,0.14874,0.13658,0.13803,0.14187,0.13383,0.13257,0.13766,0.13057,0.13675,0.13653,0.13506,0.13112,0.13271,0.1375,0.13247,0.1316,0.14226,0.13659,0.13999,0.13553,0.13381,0.13125,0.13719,0.13797,0.13777,0.13205,0.1269,0.13346,0.13787,0.13753,0.13721,0.13643,0.14105,0.13716,0.13291,0.1376,0.13436,0.13477,0.14262,0.13169,0.13695,0.13085,0.13371,0.13794,0.13445,0.13753,0.13601,0.14046,0.13889,0.13167,0.1319,0.13318,0.13702,0.13658,0.13829,0.13171,0.13747,0.13301,0.13685,0.13421,0.13377,0.13287,0.14518,0.13425,0.13912,0.14312,0.13138,0.13341  
0.16089,0.16422,0.17015,0.16762,0.15685,0.14805,0.16637,0.15153,0.16501,0.1585,0.17152,0.16399,0.15378,0.16831,0.16402,0.1654,0.14965,0.15415,0.17156,0.16738,0.51672,0.5648,0.55585,0.47834,0.15429,0.15346,0.1766,0.16048,0.16191,0.16361,0.16363,0.17164,0.16521,0.16474,0.1685,0.16906,0.16297,0.16817,0.15765,0.78572,0.49012,0.47155,0.59982,0.4145,0.52201,0.5284,0.15652,0.16036,0.17312,0.16812,0.15047,0.1622,0.16193,0.15673,0.15935,0.15285,0.16658,0.16592,0.16081,0.15005,0.16499,0.79564,0.80997,0.50509,0.6,0.51975,0.51093,0.50522,0.53106,0.42752,0.44258,0.15691,0.15907,0.155,0.16202,0.16011,0.16075,0.15596,0.16015,0.16666,0.16347,0.14834,0.16098,0.16126,0.15844,0.16873,0.80591,0.77077,0.78811,0.47864,0.465,0.40118,0.39531,0.55872,0.55034,0.46538,0.45089,0.47962,0.15782,0.1741,0.17012,0.17047,0.17227,0.16451,0.16278,0.16097,0.15524,0.16436,0.15852,0.17066,0.163,0.14944,0.16772,0.15975,0.8485,0.68497,0.86205,0.77496,0.53252,0.51571,0.57195,0.47128,0.49236,0.33817,0.49746,0.50686,0.59056,0.49601,0.16384,0.16144,0.15331,0.15772,0.1626,0.16126,0.15915,0.15592,0.16597,0.1629,0.17142,0.16505,0.16053,0.1689,0.15913,0.16559,0.85443,0.84352,0.88588,0.90757,0.78998,0.93024,0.58621,0.49373,0.47807,0.4475,0.53839,0.50823,0.44186,0.50543,0.43414,0.4525,0.15966,0.16208,0.17047,0.16019,0.17029,0.16474,0.15758,0.16143,0.15735,0.16636,0.16412,0.15608,0.16607,0.17074,0.1539,0.16526,0.15977,0.86551,0.80341,0.84445,0.86922,0.81557,0.85591,0.52462,0.52618,0.47374,0.53339,0.50388,0.41772,0.43156,0.5049,0.50269,0.5318,0.38266,0.15485,0.16279,0.16104,0.15737,0.1628,0.1529,0.15954,0.16346,0.16139,0.1611,0.16246,0.16549,0.16209,0.13824,0.14564,0.14075,0.16813,0.8217,0.80416,0.86715,0.82035,0.71792,0.78935,0.90055,0.47672,0.43081,0.54109,0.52343,0.4689,0.48303,0.50702,0.51687,0.51893,0.47667,0.52528,0.16177,0.16242,0.16786,0.16345,0.16289,0.16742,0.15634,0.1642,0.16195,0.16849,0.16568,0.1424,0.14062,0.1405,0.14325,0.13484,0.14441,0.15512,0.76076,0.87802,0.78431,0.81727,0.80075,0.93722,0.82816,0.50973,0.47461,0.50505,0.5183,0.44191,0.49943,0.51837,0.48552,0.4194,0.52761,0.39205,0.16281,0.16635,0.15796,0.1697,0.1661,0.16204,0.15964,0.15663,0.16017,0.14152,0.13944,0.13761,0.13426,0.14054,0.13055,0.14536,0.13475,0.1443,0.15894,0.86271,0.87168,0.87618,0.85822,0.82678,0.78817,0.82264,0.50781,0.49613,0.53376,0.36929,0.60271,0.4129,0.54128,0.49107,0.47664,0.49523,0.49611,0.47593,0.15903,0.16354,0.16177,0.15873,0.15691,0.15931,0.13695,0.14038,0.14021,0.14137,0.14014,0.13173,0.13671,0.13743,0.14716,0.12932,0.13773,0.14056,0.92971,0.75505,0.79737,0.91663,0.8931,0.85345,0.74432,0.52701,0.51934,0.43618,0.46708,0.47164,0.43206,0.48102,0.55805,0.49075,0.54278,0.53966,0.3978,0.16635,0.15136,0.16077,0.13546,0.14445,0.14509,0.1366,0.13462,0.13924,0.13434,0.14185,0.14152,0.13055,0.13442,0.14632,0.13563,0.13313,0.14259,0.75406,0.76523,0.82756,0.91268,0.8996,0.8477,0.798

64,0.87125,0.76104,0.43695,0.48658,0.40063,0.55136,0.53441,0.44442,0.5  
215,0.42015,0.59516,0.51599,0.56027,0.13574,0.13384,0.14449,0.13494,0.  
13517,0.13771,0.13966,0.13883,0.13485,0.14024,0.13843,0.14187,0.13858,  
0.13951,0.14043,0.14979,0.13578,0.13487,0.73372,0.85651,0.87902,0.8314  
8,0.80213,0.90585,0.89188,0.87262,0.80962,0.46312,0.51885,0.41196,0.34  
929,0.3883,0.41549,0.41627,0.36543,0.40542,0.28692,0.45047,0.13758,0.1  
3065,0.14176,0.13631,0.13804,0.13661,0.13666,0.14071,0.14276,0.13443,0  
.14352,0.13917,0.14066,0.13868,0.14247,0.14087,0.1399,0.13977,0.84852,  
0.81116,0.91278,0.91393,0.93595,0.80202,0.87882,0.90333,0.83969,0.5208  
3,0.35099,0.39528,0.37148,0.34436,0.38564,0.37687,0.3447,0.39974,0.396  
08,0.38882,0.14468,0.13704,0.13065,0.13783,0.13467,0.13785,0.13305,0.1  
4255,0.13938,0.1347,0.13191,0.13898,0.13564,0.1311,0.13808,0.13848,0.1  
3163,0.13692,0.80678,0.84961,0.75746,0.82336,0.86864,0.84178,0.98673,0  
.46105,0.51372,0.48625,0.38991,0.40779,0.40661,0.38301,0.37129,0.38586  
,0.41287,0.29419,0.3211,0.36779,0.13446,0.14149,0.13826,0.13823,0.1371  
6,0.13751,0.13732,0.13836,0.13592,0.13432,0.14132,0.14013,0.13871,0.13  
944,0.13497,0.14293,0.14104,0.14726,0.82443,0.91528,0.79471,0.90266,0.  
82441,0.86233,0.49399,0.44132,0.47033,0.47884,0.45758,0.3552,0.39284,0  
.3828,0.36248,0.42635,0.38784,0.34544,0.42854,0.33294,0.14354,0.13471,  
0.14324,0.14036,0.13877,0.1364,0.14154,0.13616,0.13752,0.14272,0.14202  
,0.13706,0.13906,0.14014,0.13828,0.13927,0.13667,0.13987,0.90538,0.884  
2,0.86556,0.81162,0.81445,0.51717,0.47434,0.46446,0.44375,0.43132,0.46  
618,0.34166,0.36281,0.35472,0.3684,0.3468,0.38315,0.4052,0.36651,0.368  
22,0.13729,0.14633,0.14059,0.13967,0.14429,0.14071,0.14603,0.13538,0.1  
3943,0.14317,0.13974,0.14149,0.13876,0.13539,0.1451,0.13553,0.13433,0.  
13171,0.70789,0.90423,0.8357,0.51251,0.49984,0.42063,0.50926,0.47776,0  
.52262,0.38614,0.53134,0.33563,0.35964,0.35714,0.35365,0.37974,0.40885  
,0.40842,0.32715,0.40641,0.13789,0.13234,0.14059,0.1351,0.14532,0.1347  
5,0.13736,0.13752,0.13152,0.13564,0.14826,0.14399,0.14071,0.13693,0.13  
941,0.13938,0.13655,0.13547,0.82049,0.46307,0.48526,0.43087,0.39468,0.  
44115,0.46513,0.3803,0.41518,0.40345,0.38657,0.37681,0.30004,0.31056,0  
.36484,0.32642,0.30141,0.4163,0.40726,0.14015,0.141,0.14361,0.13869,0.  
13586,0.13224,0.13718,0.14244,0.13664,0.13334,0.13622,0.13993,0.1342,0  
.13733,0.1426,0.13716,0.13775,0.11801,0.51297,0.52999,0.5799,0.39966,0  
.55857,0.48896,0.44228,0.50034,0.47796,0.44643,0.33893,0.40274,0.37052  
,0.35334,0.31932,0.35939,0.3552,0.39991,0.38505,0.13456,0.14279,0.1414  
6,0.13609,0.13625,0.14405,0.14074,0.1392,0.14281,0.14343,0.13908,0.143  
27,0.13779,0.13899,0.14045,0.14159,0.13346,0.11363,0.43884,0.4835,0.49  
508,0.45745,0.55523,0.4969,0.40728,0.4643,0.40231,0.44527,0.3934,0.339  
29,0.43674,0.38269,0.41018,0.38279,0.36791,0.39163,0.14151,0.13929,0.1  
3966,0.14738,0.134,0.14575,0.13414,0.14132,0.13661,0.14669,0.1392,0.14  
39,0.1343,0.14034,0.13897,0.13788,0.13885,0.14418,0.11805,0.46848,0.46  
536,0.51707,0.52471,0.46679,0.43592,0.4331,0.48164,0.44699,0.48188,0.3  
8803,0.37467,0.4158,0.34655,0.33628,0.38034,0.40405,0.38377,0.13804,0.  
14018,0.14461,0.14084,0.1429,0.13984,0.13511,0.1352,0.13808,0.13986,0.  
14275,0.13834,0.13833,0.14403,0.1379,0.13603,0.1373,0.11932,0.12075,0.  
12421,0.43766,0.44985,0.4543,0.40853,0.46059,0.35599,0.44128,0.50916,0  
.46493,0.30897,0.38884,0.39043,0.38828,0.36119,0.33,0.14145,0.14053,0.  
13535,0.14102,0.14175,0.13511,0.1415,0.1427,0.13947,0.13915,0.13667,0.  
13485,0.14218,0.13451,0.13229,0.1376,0.13653,0.13365,0.1159,0.11391,0.  
12031,0.11377,0.43941,0.47607,0.43369,0.4647,0.38715,0.44037,0.36969,0  
.44206,0.49909,0.38324,0.40491,0.40382,0.14003,0.14597,0.14036,0.1359,

0.14332,0.13138,0.13968,0.13912,0.14417,0.14601,0.13741,0.14174,0.1369  
2,0.13832,0.14104,0.13784,0.13995,0.13095,0.13828,0.13445,0.11738,0.11  
313,0.1118,0.11091,0.11446,0.11681,0.40048,0.46655,0.36657,0.40077,0.5  
1922,0.41111,0.46956,0.48514,0.1427,0.13223,0.13242,0.14973,0.13991,0.  
13907,0.13863,0.13705,0.14311,0.14636,0.13545,0.1379,0.14018,0.13832,0  
.14207,0.13608,0.13904,0.14197,0.14098,0.13995,0.13622,0.14509,0.13568  
,0.11695,0.11098,0.12386,0.10621,0.11751,0.1147,0.49299,0.5077,0.53296  
,0.53845,0.4658,0.11878,0.11261,0.13911,0.13531,0.13111,0.13815,0.1374  
,0.144,0.13227,0.13983,0.13914,0.1423,0.14071,0.13307,0.13823,0.13944,  
0.13899,0.14374,0.13939,0.13866,0.13785,0.1331,0.14443,0.12062,0.11498  
,0.11804,0.1188,0.12057,0.12063,0.12224,0.12333,0.11185,0.12099,0.4150  
7,0.4953,0.11626,0.11018,0.11728,0.11631,0.13879,0.13503,0.13641,0.136  
15,0.12873,0.13571,0.1384,0.13932,0.13777,0.13397,0.13736,0.13843,0.14  
079,0.13219,0.14046,0.14025,0.14279,0.14186,0.14067,0.11781,0.11545,0.  
11379,0.12091,0.11566,0.11204,0.11037,0.12639,0.1177,0.11743,0.1144,0.  
12021,0.11151,0.10746,0.11324,0.12152,0.1151,0.14208,0.14349,0.14,0.14  
348,0.13589,0.13465,0.13485,0.13965,0.13306,0.13693,0.14303,0.13828,0.  
14156,0.13735,0.13194,0.13985,0.10853,0.12065,0.12284,0.12085,0.11265,  
0.10955,0.11462,0.1141,0.11969,0.11764,0.11688,0.10983,0.12043,0.11388  
,0.11936,0.11107,0.1176,0.11601,0.11579,0.14497,0.1394,0.13952,0.13975  
,0.13392,0.14193,0.13901,0.14167,0.14017,0.13559,0.14186,0.13684,0.135  
32,0.11852,0.11142,0.11846,0.11683,0.11516,0.11384,0.11081,0.11368,0.1  
2007,0.11058,0.11905,0.10648,0.11103,0.11379,0.11471,0.1078,0.11856,0.  
11017,0.11699,0.12433,0.11631,0.13607,0.13796,0.13545,0.13819,0.15045,  
0.13601,0.13932,0.14093,0.13713,0.1154,0.11507,0.12031,0.1079,0.11289,  
0.12053,0.11643,0.11971,0.11654,0.11779,0.12046,0.1175,0.11567,0.12674  
,0.1145,0.11512,0.11863,0.11741,0.1211,0.1088,0.11351,0.12242,0.12517,  
0.11571,0.12058,0.14196,0.13929,0.1392,0.142,0.10933,0.1162,0.1177,0.1  
1521,0.11509,0.1181,0.10716,0.10724,0.1163,0.11375,0.12112,0.11622,0.1  
1011,0.11472,0.11194,0.11362,0.11712,0.11355,0.11156,0.12158,0.11415,0  
.11699,0.11292,0.1088,0.11063,0.11781,0.1112,0.11244,0.12008,0.11501,0  
.11591,0.1154,0.1207,0.11072,0.11758,0.11326,0.1174,0.11491,0.11663,0.  
11019,0.11482,0.11311,0.12001,0.1115,0.11764,0.11804,0.1173,0.11619,0.  
1189,0.11778,0.11929,0.11708,0.11889,0.11007,0.11555,0.12058,0.11688,0  
.12239,0.12079,0.11733,0.1176,0.11451,0.11034,0.11651,0.11378,0.11626,  
0.11632,0.11361,0.11821,0.12066,0.11457,0.12004,0.12058,0.11833,0.1161  
3,0.11521,0.12843,0.1159,0.11672,0.11417,0.12102,0.11861,0.12132,0.120  
61,0.11572,0.11888,0.11226,0.11208,0.11889,0.12055,0.11755,0.11063,0.1  
1515,0.11295,0.11392,0.12139,0.11996,0.11646,0.11225,0.11507,0.12058,0  
.10435,0.1156,0.11917,0.11279,0.12013,0.11494,0.11635,0.11645,0.11775,  
0.11531,0.11787,0.11894,0.11199,0.11571,0.11585,0.12342,0.10736,0.1167  
7,0.11086,0.11648,0.11516,0.11663,0.11183,0.11631,0.11698,0.12141,0.12  
766,0.11468,0.11769,0.12191,0.1137,0.11552,0.11389,0.10913,0.11767,0.1  
1711,0.11841,0.1108,0.11351,0.11727,0.11338,0.11039,0.12174,0.11706,0.  
11916,0.117,0.11526,0.11181,0.12139,0.11689,0.11857,0.1136,0.10762,0.1  
1652,0.11701,0.11813,0.11477,0.11735,0.12442,0.11761,0.11345,0.11467,0  
.11447,0.114,0.12285,0.10983,0.11926,0.11114,0.11387,0.11683,0.11526,0  
.11693,0.11582,0.12308,0.11837,0.11098,0.11024,0.11633,0.11668,0.11747  
,0.11989,0.11282,0.11871,0.11725,0.11652,0.11577,0.11539,0.11291,0.123  
11,0.11172,0.11655,0.12495,0.11295,0.11444  
0.17153,0.1733,0.1789,0.17475,0.17092,0.16284,0.17622,0.1643,0.17854,0  
.17148,0.18336,0.17792,0.16504,0.17788,0.17915,0.17424,0.16007,0.16817

,0.18474,0.17635,0.39699,0.46936,0.41748,0.42838,0.17051,0.16537,0.19122,0.17112,0.17717,0.17514,0.17966,0.17699,0.17551,0.17457,0.18466,0.1765,0.16969,0.17984,0.16879,0.60613,0.3966,0.38403,0.48764,0.34667,0.42629,0.42409,0.17267,0.17515,0.18386,0.17871,0.16188,0.17182,0.17229,0.16791,0.16684,0.1663,0.18185,0.17406,0.17489,0.16448,0.17493,0.66377,0.63234,0.40907,0.46878,0.44512,0.43242,0.40617,0.43867,0.3537,0.37585,0.1749,0.17108,0.16604,0.16972,0.1698,0.17247,0.1639,0.17491,0.178,0.17584,0.1625,0.17386,0.17456,0.16907,0.18143,0.67478,0.59864,0.59641,0.41266,0.3853,0.33819,0.35227,0.44277,0.45791,0.38988,0.3966,0.38066,0.16972,0.18254,0.179,0.18117,0.17839,0.17974,0.17834,0.17478,0.17037,0.17778,0.17028,0.18379,0.17516,0.1598,0.17643,0.17255,0.67137,0.50756,0.65687,0.64399,0.41898,0.43438,0.45445,0.36285,0.4068,0.30758,0.42626,0.4197,0.48274,0.4095,0.17651,0.17272,0.16691,0.17088,0.17183,0.17035,0.1705,0.1664,0.17697,0.17603,0.18181,0.17242,0.17398,0.17898,0.17099,0.17674,0.68375,0.64012,0.71245,0.75609,0.60993,0.75403,0.49698,0.42102,0.39258,0.38731,0.45491,0.44141,0.37155,0.43548,0.3538,0.38882,0.16788,0.17203,0.18103,0.17223,0.18687,0.17719,0.17059,0.17397,0.16745,0.17693,0.17412,0.17318,0.17592,0.18086,0.16444,0.17573,0.16906,0.64903,0.6544,0.65455,0.71731,0.61947,0.68249,0.42927,0.42825,0.39575,0.41188,0.43214,0.35873,0.35635,0.43254,0.41409,0.44483,0.329,0.16777,0.17761,0.17004,0.17177,0.17846,0.1638,0.1752,0.17515,0.17301,0.17116,0.17443,0.17839,0.1724,0.13497,0.14225,0.13704,0.18249,0.62475,0.60636,0.71127,0.65488,0.53138,0.55641,0.74095,0.40229,0.33561,0.44128,0.42679,0.39062,0.39469,0.41623,0.4481,0.44394,0.40073,0.46423,0.17041,0.17315,0.17892,0.17089,0.18019,0.17808,0.17053,0.16767,0.17679,0.17653,0.17807,0.13976,0.13556,0.13282,0.14155,0.12938,0.14037,0.16825,0.59731,0.65498,0.6575,0.67887,0.65698,0.71169,0.65217,0.43346,0.39846,0.42472,0.43729,0.36804,0.40708,0.42776,0.3922,0.35366,0.45778,0.33733,0.17337,0.17499,0.16942,0.1837,0.1809,0.178,0.17499,0.17052,0.17488,0.13781,0.13517,0.13236,0.12914,0.13789,0.12471,0.14383,0.13344,0.1409,0.1713,0.64946,0.73678,0.7138,0.72829,0.63821,0.59065,0.59796,0.43148,0.38811,0.44124,0.31997,0.48795,0.34944,0.45023,0.3916,0.40848,0.42411,0.39916,0.40267,0.17293,0.17232,0.17547,0.16742,0.16773,0.17042,0.13097,0.13873,0.13502,0.14003,0.13946,0.12665,0.13648,0.13369,0.14511,0.12452,0.1335,0.13745,0.69366,0.59919,0.64452,0.74064,0.69482,0.61296,0.60574,0.45587,0.445,0.34866,0.37941,0.3834,0.36376,0.40928,0.42705,0.41025,0.46681,0.42589,0.34784,0.17702,0.16437,0.17227,0.1323,0.14149,0.1429,0.13532,0.13113,0.13184,0.12677,0.14326,0.14416,0.12299,0.12785,0.14153,0.12937,0.13113,0.14381,0.55984,0.60587,0.65362,0.75399,0.73037,0.66856,0.6038,0.68197,0.59387,0.36312,0.42391,0.33415,0.43666,0.4494,0.36366,0.43568,0.34426,0.50822,0.43566,0.46183,0.12923,0.12518,0.14409,0.12697,0.13268,0.13751,0.13586,0.13468,0.13099,0.1343,0.1359,0.13748,0.13528,0.13562,0.13379,0.14544,0.13147,0.1261,0.55852,0.66617,0.78444,0.63506,0.60232,0.71484,0.70234,0.7313,0.61627,0.39171,0.42085,0.33873,0.2963,0.33923,0.33977,0.33754,0.31523,0.31541,0.24701,0.36254,0.13508,0.12143,0.137,0.12995,0.13626,0.13241,0.13527,0.13661,0.14121,0.12979,0.14069,0.13272,0.13532,0.13547,0.13929,0.14057,0.1377,0.13712,0.67225,0.66832,0.72483,0.751,0.72958,0.59469,0.68452,0.72238,0.68389,0.41859,0.28272,0.33235,0.30481,0.28124,0.31084,0.31729,0.28869,0.33454,0.32528,0.33673,0.14038,0.1292,0.12815,0.13502,0.12656,0.13351,0.13065,0.13569,0.13222,0.12864,0.12709,0.13479,0.12823,0.11975,0.13547,0.13507,0.12414,0.13,0.61381,0.67604,0.53435,0.67269,0.71171,0.69879,0.77154,0.37097,0.3

9924,0.38517,0.31625,0.34845,0.33192,0.32483,0.30189,0.31679,0.33427,0.25853,0.2662,0.30464,0.13071,0.13699,0.13436,0.13046,0.13471,0.13454,0.13357,0.13512,0.13047,0.12729,0.13625,0.13516,0.13432,0.13654,0.12999,0.14008,0.13879,0.14293,0.64979,0.72151,0.60504,0.72486,0.62898,0.6762,0.37937,0.35642,0.36165,0.40255,0.35936,0.29463,0.31531,0.31617,0.29428,0.34556,0.30997,0.30227,0.35776,0.30357,0.14134,0.12704,0.13634,0.13673,0.13464,0.13037,0.13671,0.13089,0.13178,0.13999,0.13807,0.13641,0.13511,0.13858,0.13484,0.13392,0.12974,0.1372,0.71627,0.67176,0.69069,0.62275,0.62642,0.40782,0.38487,0.38274,0.34881,0.33344,0.38506,0.28553,0.29394,0.29515,0.29579,0.29636,0.31707,0.32351,0.30945,0.29937,0.13299,0.14594,0.13614,0.1364,0.14104,0.13819,0.14162,0.12793,0.13213,0.13477,0.13859,0.13745,0.13169,0.13641,0.14644,0.13205,0.13024,0.12071,0.5288,0.76418,0.60576,0.39129,0.38593,0.33734,0.41498,0.41409,0.41607,0.2894,0.41476,0.28138,0.30213,0.30899,0.2916,0.30484,0.33936,0.33813,0.27107,0.34707,0.13294,0.12588,0.13949,0.12833,0.14337,0.12832,0.13244,0.1338,0.12391,0.13238,0.14994,0.13879,0.13762,0.13303,0.13475,0.13466,0.13361,0.13094,0.64512,0.36087,0.39589,0.34862,0.3394,0.35258,0.36276,0.28018,0.31859,0.30522,0.32632,0.31212,0.24767,0.26941,0.31016,0.27479,0.25725,0.34264,0.34793,0.1369,0.136,0.1414,0.13477,0.13285,0.12481,0.13249,0.13689,0.13223,0.12911,0.1289,0.13466,0.12566,0.13303,0.13908,0.1297,0.1322,0.096286,0.42544,0.41197,0.45841,0.31477,0.44142,0.37141,0.32562,0.40422,0.36819,0.35316,0.2792,0.33923,0.31055,0.31034,0.26817,0.30749,0.30303,0.33386,0.31459,0.13202,0.14197,0.13651,0.13255,0.12874,0.14011,0.13698,0.13284,0.13843,0.13956,0.13587,0.13832,0.1335,0.13471,0.13713,0.13827,0.12739,0.095642,0.33997,0.36515,0.3786,0.35063,0.42997,0.41432,0.32585,0.36523,0.32511,0.36973,0.32195,0.2835,0.34586,0.31343,0.33989,0.30321,0.30839,0.31978,0.14543,0.13462,0.1365,0.14633,0.13282,0.14266,0.13208,0.13602,0.12922,0.14478,0.13524,0.13803,0.13132,0.13766,0.13565,0.13234,0.13515,0.14114,0.098755,0.37791,0.34565,0.40936,0.42238,0.34213,0.33366,0.35946,0.4,0.35715,0.37871,0.3148,0.3157,0.34627,0.28687,0.29072,0.31617,0.32405,0.33454,0.13322,0.13393,0.14312,0.13794,0.14074,0.13443,0.13144,0.13203,0.13413,0.13529,0.13939,0.13353,0.13298,0.13786,0.13154,0.13257,0.13195,0.099293,0.10045,0.10023,0.31476,0.33169,0.36731,0.33545,0.37589,0.26876,0.33631,0.41149,0.3635,0.26395,0.32752,0.34157,0.31645,0.29267,0.26627,0.13706,0.13637,0.13268,0.13884,0.13617,0.12763,0.13791,0.13998,0.13642,0.13735,0.13249,0.12717,0.13951,0.12819,0.12413,0.13379,0.13281,0.12853,0.093279,0.093585,0.098212,0.092503,0.33306,0.37843,0.3461,0.37329,0.32328,0.35903,0.29869,0.34172,0.38521,0.29941,0.34745,0.33377,0.13236,0.14814,0.13907,0.13295,0.14122,0.12394,0.13548,0.13549,0.1399,0.14453,0.13081,0.137,0.12624,0.13773,0.13605,0.1279,0.13474,0.12309,0.13369,0.13018,0.099988,0.091492,0.092983,0.092155,0.097647,0.094903,0.3119,0.38028,0.30505,0.29669,0.41917,0.31103,0.36872,0.38974,0.13682,0.12516,0.12125,0.14647,0.13614,0.13198,0.13508,0.12905,0.13954,0.14604,0.13134,0.13641,0.1375,0.13655,0.14211,0.13085,0.13462,0.13844,0.13565,0.13446,0.13396,0.14522,0.1314,0.095539,0.091921,0.10372,0.088928,0.09959,0.094247,0.36619,0.40089,0.42268,0.43151,0.39844,0.10154,0.096541,0.13361,0.13345,0.12532,0.13392,0.13312,0.13874,0.12676,0.13538,0.1317,0.13635,0.13744,0.12529,0.13352,0.13481,0.13868,0.13967,0.1344,0.1322,0.13464,0.12531,0.14059,0.10127,0.093935,0.0988,0.09888,0.099233,0.10073,0.10519,0.10038,0.093658,0.10008,0.34717,0.39929,0.094343,0.091525,0.096946,0.094179,0.13224,0.13249,0.13107,0.13215,0.12083,0.1342,0.13424,0.13293,0.

13619,0.12776,0.13128,0.13431,0.13376,0.12717,0.13515,0.13751,0.13883,  
0.14064,0.13824,0.10077,0.094796,0.094498,0.10053,0.097183,0.090398,0.  
091592,0.10465,0.095957,0.099334,0.098527,0.10217,0.090465,0.086134,0.  
093996,0.099174,0.095308,0.13734,0.1389,0.14051,0.14084,0.12853,0.1308  
7,0.12949,0.13711,0.12548,0.13052,0.14061,0.13837,0.13859,0.13401,0.12  
418,0.13608,0.089181,0.10165,0.10365,0.099823,0.089466,0.090187,0.0960  
11,0.094263,0.10258,0.096775,0.094547,0.089441,0.10044,0.092005,0.1001  
,0.089126,0.097303,0.09785,0.096541,0.14154,0.13234,0.13656,0.13352,0.  
12797,0.14218,0.13364,0.13769,0.13689,0.13185,0.13687,0.13393,0.13485,  
0.096281,0.091219,0.098356,0.095947,0.092628,0.095796,0.093005,0.09308  
8,0.099243,0.094159,0.098575,0.087881,0.093519,0.093674,0.097698,0.089  
205,0.097035,0.09051,0.096765,0.10346,0.097059,0.13075,0.13556,0.13128  
,0.13102,0.14923,0.1315,0.1345,0.13699,0.13372,0.093924,0.098059,0.102  
71,0.085218,0.094412,0.099194,0.098861,0.10218,0.098924,0.096817,0.101  
35,0.099632,0.098182,0.10581,0.09565,0.098104,0.098688,0.097821,0.1010  
5,0.087562,0.092943,0.103,0.10175,0.09689,0.10174,0.13525,0.13378,0.13  
702,0.139,0.092902,0.096555,0.096583,0.094044,0.094787,0.098857,0.0901  
43,0.090178,0.093422,0.093492,0.10471,0.094264,0.092315,0.09485,0.0921  
88,0.093896,0.096757,0.093941,0.092745,0.09902,0.093579,0.09664,0.0926  
2,0.089361,0.090235,0.096136,0.090611,0.09401,0.099966,0.09636,0.09572  
7,0.096949,0.1001,0.092221,0.095655,0.091316,0.097619,0.096532,0.09534  
4,0.090322,0.094878,0.093682,0.102,0.093402,0.094986,0.098269,0.099303  
,0.098459,0.094509,0.094357,0.097666,0.096654,0.099035,0.091659,0.0952  
69,0.10238,0.098898,0.10178,0.10341,0.097869,0.095843,0.093892,0.09001  
4,0.096996,0.094834,0.098162,0.098202,0.093109,0.098513,0.099803,0.095  
425,0.10271,0.099829,0.097597,0.09528,0.097637,0.10624,0.09521,0.09665  
2,0.094045,0.10149,0.096753,0.10012,0.10249,0.097191,0.099009,0.092727  
,0.093361,0.099107,0.10161,0.0977,0.091481,0.097967,0.093639,0.094213,  
0.10246,0.101,0.098297,0.091853,0.096926,0.10098,0.08452,0.09419,0.100  
54,0.09343,0.098785,0.09557,0.098703,0.097418,0.097746,0.09429,0.09769  
1,0.09772,0.091219,0.098157,0.0973,0.10483,0.090185,0.092936,0.093389,  
0.097032,0.095725,0.098583,0.096668,0.099295,0.098265,0.10156,0.10817,  
0.095566,0.096269,0.10223,0.094006,0.098445,0.095273,0.089151,0.099486  
,0.0976,0.099394,0.090053,0.093929,0.095977,0.091653,0.091187,0.1059,0.  
09805,0.099083,0.095551,0.095927,0.093179,0.10133,0.096344,0.098519,0.  
092697,0.091606,0.097775,0.094975,0.097075,0.094905,0.09348,0.10529,0.  
097019,0.093902,0.096779,0.096055,0.092396,0.10444,0.092026,0.099744,  
0.091015,0.094397,0.095552,0.09529,0.098597,0.094982,0.10264,0.10074,0.  
091622,0.091879,0.098463,0.094714,0.09623,0.097999,0.093395,0.099113,  
0.09727,0.095854,0.096366,0.097593,0.092228,0.10256,0.095676,0.096054,  
0.10036,0.094008,0.094553  
0.18292,0.18188,0.18527,0.18199,0.17868,0.17572,0.18543,0.1744,0.1843,  
0.17552,0.19286,0.18538,0.16906,0.18707,0.18778,0.17992,0.16907,0.1768  
7,0.19187,0.18672,0.35196,0.43395,0.36853,0.38652,0.17528,0.17368,0.19  
558,0.18151,0.18877,0.18644,0.18794,0.18594,0.18408,0.18417,0.19448,0.  
18681,0.17931,0.18605,0.18037,0.50958,0.36759,0.35735,0.44774,0.29967,  
0.3975,0.39517,0.18057,0.18627,0.18669,0.18471,0.17463,0.17885,0.1786,  
0.1743,0.17414,0.17684,0.18687,0.17834,0.18532,0.17351,0.18208,0.53326  
,0.5492,0.38453,0.39358,0.39402,0.37862,0.33317,0.37344,0.3337,0.34511  
,0.18729,0.17908,0.17343,0.17516,0.17388,0.18006,0.17061,0.18143,0.187  
73,0.18176,0.16722,0.18302,0.18278,0.1787,0.18411,0.57603,0.52828,0.49  
363,0.34205,0.32334,0.31673,0.31154,0.39645,0.42941,0.34762,0.36075,0.

31352,0.17934,0.18806,0.18491,0.18709,0.18848,0.19012,0.18804,0.18654,  
0.17843,0.18597,0.17852,0.18988,0.18015,0.16644,0.18494,0.181,0.56362,  
0.4026,0.53598,0.54231,0.35752,0.36114,0.39102,0.30276,0.36076,0.28968  
,0.40463,0.36926,0.42507,0.3582,0.18655,0.18147,0.17831,0.179,0.18203,  
0.17719,0.18179,0.17279,0.1813,0.18737,0.19052,0.1837,0.18332,0.184,0.  
17557,0.18518,0.59287,0.55748,0.5894,0.65516,0.50421,0.68071,0.45505,0  
.36736,0.34787,0.33585,0.40017,0.39154,0.3308,0.37211,0.31761,0.32742,  
0.17259,0.17749,0.18845,0.17483,0.19426,0.18719,0.18101,0.18162,0.1781  
6,0.18467,0.1878,0.18117,0.18509,0.19047,0.17384,0.18177,0.1767,0.5158  
,0.54982,0.5551,0.60886,0.52072,0.55804,0.36934,0.35884,0.33089,0.3744  
6,0.36433,0.32316,0.31515,0.35631,0.35102,0.38881,0.29329,0.1747,0.186  
2,0.17653,0.17689,0.18708,0.17051,0.17771,0.18473,0.18214,0.17937,0.18  
142,0.18957,0.18048,0.12988,0.14253,0.13335,0.18696,0.54231,0.50672,0.  
5675,0.59564,0.42103,0.48687,0.61815,0.36003,0.29124,0.36018,0.3906,0.  
34291,0.33536,0.38038,0.39819,0.38275,0.33991,0.42834,0.17676,0.1843,0  
.1873,0.17777,0.18443,0.18448,0.17546,0.17752,0.18582,0.18265,0.18705,  
0.13367,0.13034,0.12817,0.13742,0.12648,0.13585,0.17834,0.46454,0.5430  
7,0.56008,0.54457,0.57197,0.54602,0.55919,0.38028,0.33985,0.37092,0.38  
013,0.30941,0.34184,0.34769,0.3449,0.29648,0.39551,0.2817,0.18002,0.18  
448,0.1774,0.19461,0.18782,0.18515,0.18186,0.18047,0.18243,0.13238,0.1  
3161,0.12834,0.12495,0.13365,0.12073,0.13933,0.13036,0.13333,0.17706,0  
.57799,0.59217,0.58841,0.63281,0.56529,0.48202,0.45396,0.37191,0.34078  
,0.37217,0.28842,0.44,0.30477,0.38316,0.32079,0.36664,0.3782,0.3609,0.  
35258,0.1818,0.1828,0.1844,0.1784,0.18002,0.17916,0.12593,0.13487,0.12  
817,0.1366,0.13543,0.11918,0.13511,0.13034,0.14295,0.11996,0.12719,0.1  
3436,0.57214,0.47809,0.49741,0.60478,0.53581,0.46938,0.5005,0.39209,0.  
40569,0.30808,0.32659,0.3424,0.32457,0.3623,0.36558,0.37734,0.42123,0.  
37704,0.31703,0.18196,0.17327,0.18317,0.12792,0.13712,0.13888,0.13415,  
0.12581,0.12566,0.12207,0.14317,0.14032,0.11524,0.12374,0.1388,0.12354  
,0.12951,0.14599,0.49195,0.46784,0.52729,0.63292,0.61801,0.57119,0.488  
44,0.56217,0.49415,0.32856,0.36487,0.28704,0.38396,0.39226,0.33495,0.3  
6402,0.30937,0.46765,0.3902,0.38584,0.12362,0.11933,0.14043,0.12014,0.  
13127,0.13643,0.13262,0.13052,0.12757,0.13296,0.13353,0.13313,0.1288,0  
.13099,0.12881,0.14117,0.12501,0.11775,0.45923,0.55896,0.67654,0.51653  
,0.46711,0.61119,0.54641,0.59763,0.51704,0.33403,0.38655,0.31133,0.268  
55,0.28756,0.28167,0.27442,0.27293,0.2689,0.22598,0.31782,0.13116,0.11  
278,0.13244,0.12388,0.13571,0.13046,0.13152,0.13156,0.13701,0.12513,0.  
13799,0.12603,0.13272,0.1302,0.13431,0.13604,0.13367,0.13318,0.54283,0  
.56736,0.6417,0.66077,0.61356,0.50218,0.57752,0.63552,0.58204,0.36335,  
0.25247,0.29446,0.25305,0.25577,0.26989,0.27458,0.24768,0.29918,0.2914  
3,0.29309,0.13449,0.12376,0.12496,0.13142,0.12156,0.12867,0.12734,0.12  
854,0.12512,0.12388,0.12481,0.13284,0.12188,0.11249,0.13179,0.1305,0.1  
1755,0.12328,0.495,0.49676,0.4396,0.55009,0.58165,0.57606,0.67073,0.31  
961,0.33892,0.32464,0.26568,0.3134,0.28203,0.27337,0.25327,0.27545,0.2  
8661,0.23401,0.23587,0.26452,0.12976,0.13245,0.13363,0.12338,0.12962,0  
.12834,0.12716,0.13187,0.12799,0.12081,0.13153,0.13108,0.12715,0.13236  
,0.1251,0.13601,0.137,0.1389,0.5569,0.61076,0.54198,0.61366,0.53177,0.  
58058,0.3215,0.3032,0.32252,0.32763,0.28919,0.24137,0.2686,0.28842,0.2  
5537,0.3009,0.25981,0.25448,0.32265,0.27258,0.13544,0.12074,0.12929,0.  
13185,0.13081,0.12571,0.1316,0.12655,0.12526,0.13924,0.1344,0.13721,0.  
13199,0.13727,0.13236,0.12824,0.12705,0.137,0.58473,0.53514,0.55176,0.  
55234,0.51369,0.34774,0.33404,0.30684,0.28345,0.25405,0.32468,0.25584,



0.2588,0.25688,0.27292,0.24802,0.27743,0.27212,0.26216,0.24969,0.12799  
,0.14551,0.13333,0.13008,0.13785,0.13573,0.13877,0.1215,0.1307,0.13038  
,0.1352,0.13485,0.12673,0.13453,0.14739,0.12849,0.1276,0.11377,0.50256  
,0.6747,0.52128,0.33113,0.32934,0.27363,0.32829,0.34787,0.3423,0.21459  
,0.36539,0.24055,0.25796,0.26957,0.26582,0.26729,0.30417,0.2913,0.2436  
8,0.30024,0.12692,0.12074,0.13846,0.1208,0.13954,0.12131,0.12981,0.129  
69,0.11668,0.1279,0.14941,0.13581,0.13397,0.12702,0.12986,0.12936,0.12  
873,0.1264,0.49018,0.2991,0.3365,0.3144,0.24607,0.30583,0.27556,0.2372  
,0.26002,0.24195,0.29567,0.27963,0.214,0.24098,0.27194,0.26024,0.23243  
,0.29129,0.29232,0.13541,0.13258,0.13674,0.13032,0.12763,0.11779,0.131  
25,0.13546,0.12929,0.12254,0.12568,0.12893,0.12073,0.13054,0.1334,0.12  
797,0.12788,0.080589,0.36266,0.31437,0.37243,0.27439,0.36906,0.29565,0  
.26364,0.34075,0.30848,0.28562,0.2487,0.3032,0.27536,0.26376,0.25154,0  
.26394,0.2716,0.29561,0.27087,0.13044,0.13849,0.13289,0.12814,0.12311,  
0.1359,0.13321,0.12874,0.13319,0.13654,0.13495,0.13532,0.13164,0.13104  
,0.13443,0.13358,0.12472,0.081682,0.26523,0.29445,0.30396,0.3138,0.368  
23,0.32813,0.24864,0.30496,0.28464,0.31551,0.2936,0.24724,0.29795,0.25  
967,0.30046,0.25261,0.25751,0.25467,0.14905,0.13094,0.13228,0.14265,0.  
12854,0.13923,0.13222,0.13203,0.1218,0.14152,0.12761,0.13531,0.13059,0  
.13315,0.13044,0.12698,0.13328,0.1376,0.083331,0.31852,0.29108,0.31646  
,0.34973,0.3119,0.26876,0.28915,0.33165,0.28823,0.31055,0.27232,0.2635  
5,0.30539,0.2489,0.26789,0.27245,0.26743,0.30109,0.12874,0.12651,0.139  
27,0.13428,0.1354,0.12992,0.12558,0.1299,0.12881,0.13267,0.13531,0.127  
39,0.12609,0.13423,0.12915,0.13224,0.12777,0.082521,0.084386,0.081922,  
0.24411,0.26965,0.27712,0.28367,0.30954,0.23199,0.26228,0.34046,0.2884  
6,0.23221,0.29141,0.29863,0.28469,0.25621,0.22796,0.13122,0.12911,0.12  
911,0.13449,0.13318,0.12139,0.13111,0.13626,0.13308,0.13279,0.12906,0.  
1188,0.13821,0.12368,0.1162,0.13084,0.13016,0.12552,0.07737,0.078116,0  
.081723,0.077309,0.28005,0.32118,0.27079,0.29616,0.24975,0.2942,0.2558  
,0.27485,0.32455,0.27303,0.29663,0.27847,0.12657,0.1494,0.13674,0.1308  
3,0.13681,0.11938,0.13175,0.1352,0.13946,0.14486,0.12563,0.13216,0.120  
68,0.13321,0.13036,0.12184,0.13005,0.11677,0.12713,0.12487,0.08583,0.0  
7541,0.077036,0.074836,0.082507,0.079344,0.28106,0.32733,0.25775,0.243  
01,0.32929,0.23539,0.31739,0.32738,0.13124,0.12256,0.11314,0.14433,0.1  
3101,0.12849,0.13094,0.12363,0.13392,0.14652,0.12798,0.13296,0.13426,0  
.13187,0.1414,0.12765,0.13023,0.1348,0.12861,0.12977,0.13123,0.14425,0  
.12691,0.079674,0.07687,0.087421,0.06963,0.08104,0.076541,0.29623,0.34  
526,0.37082,0.37391,0.34647,0.082266,0.077669,0.12905,0.13043,0.11733,  
0.12941,0.12917,0.13481,0.1208,0.13087,0.12615,0.1306,0.1313,0.11994,0  
.13132,0.1295,0.13691,0.1358,0.12843,0.12733,0.12999,0.11619,0.134,0.0  
85642,0.076085,0.084199,0.080243,0.082298,0.084033,0.090462,0.084784,0  
.078735,0.085788,0.28492,0.35137,0.076861,0.07253,0.079737,0.076745,0.  
12481,0.12936,0.12429,0.13061,0.11481,0.13272,0.13136,0.12679,0.13125,  
0.12133,0.12516,0.13071,0.12688,0.12281,0.13131,0.1325,0.13407,0.13625  
,0.13326,0.083361,0.077482,0.076713,0.083851,0.083077,0.074077,0.07715  
7,0.087911,0.08041,0.082512,0.082453,0.084268,0.075853,0.072241,0.0784  
02,0.083967,0.08039,0.1347,0.13368,0.13497,0.13488,0.12029,0.12842,0.1  
2394,0.13248,0.12154,0.12632,0.13564,0.13518,0.13256,0.13027,0.12063,0  
.13343,0.071794,0.084887,0.087631,0.086719,0.075105,0.072687,0.081374,  
0.081146,0.087397,0.082116,0.077888,0.076563,0.081238,0.076128,0.08324  
9,0.072697,0.080766,0.082561,0.081553,0.13701,0.12355,0.13333,0.12948,  
0.12337,0.13943,0.12782,0.13432,0.13457,0.12728,0.13079,0.13067,0.1337

5,0.080937,0.072618,0.083481,0.079198,0.07509,0.07753,0.078786,0.07807  
,0.081403,0.076186,0.080793,0.071131,0.077257,0.077185,0.07968,0.07534  
8,0.080224,0.07321,0.079209,0.087743,0.080238,0.12649,0.13173,0.12599,  
0.12395,0.14838,0.12825,0.13161,0.13399,0.12793,0.077665,0.081532,0.08  
4089,0.069219,0.079105,0.081847,0.081014,0.086091,0.080805,0.078382,0.  
083904,0.083403,0.081852,0.091099,0.080003,0.080961,0.080973,0.079629,  
0.082544,0.068012,0.077836,0.084214,0.083311,0.080576,0.084085,0.13082  
,0.12631,0.13452,0.13447,0.076231,0.080256,0.080085,0.080851,0.077069,  
0.083754,0.07346,0.076376,0.078017,0.078572,0.087332,0.078179,0.077233  
,0.079626,0.075252,0.079094,0.081066,0.078882,0.076122,0.08111,0.07836  
,0.080128,0.078762,0.073909,0.077109,0.079121,0.071266,0.076846,0.0811  
93,0.081262,0.077916,0.079238,0.084925,0.073678,0.081367,0.076029,0.08  
4026,0.079008,0.077502,0.074248,0.077474,0.077741,0.085963,0.075887,0.  
07717,0.081328,0.082861,0.08174,0.079468,0.073957,0.08401,0.076372,0.0  
85004,0.077965,0.074955,0.085619,0.079865,0.085182,0.084513,0.080508,0  
.082678,0.076799,0.074958,0.08181,0.081581,0.081168,0.081447,0.08005,0  
.081614,0.082203,0.078542,0.085153,0.082563,0.082521,0.080234,0.080731  
,0.092353,0.081918,0.082035,0.077442,0.087709,0.080867,0.08247,0.08680  
3,0.080467,0.082048,0.078926,0.078384,0.080203,0.082604,0.080645,0.077  
818,0.079973,0.077784,0.079903,0.085611,0.084418,0.082288,0.076568,0.0  
80685,0.082223,0.07028,0.078684,0.083441,0.076398,0.083618,0.080564,0.  
081105,0.08302,0.079496,0.07644,0.079806,0.084211,0.074647,0.080949,0.  
076215,0.085408,0.075656,0.074461,0.079231,0.079707,0.080316,0.079983,  
0.078475,0.084186,0.082636,0.079143,0.092698,0.078207,0.077501,0.08434  
7,0.076193,0.080872,0.078594,0.07518,0.08339,0.081343,0.081713,0.07129  
9,0.079231,0.076877,0.076643,0.0747,0.089805,0.081474,0.082329,0.07905  
5,0.07893,0.077246,0.083624,0.081394,0.080912,0.073877,0.07509,0.08395  
3,0.079929,0.083593,0.0787,0.080282,0.086812,0.079817,0.081176,0.08031  
,0.079289,0.078066,0.086698,0.076351,0.082338,0.07291,0.078508,0.07637  
3,0.081624,0.082523,0.081865,0.083981,0.081839,0.072857,0.079066,0.080  
152,0.077122,0.079417,0.081489,0.078103,0.082813,0.081838,0.083844,0.0  
78117,0.077621,0.076081,0.083739,0.076291,0.082638,0.084824,0.078183,0  
.076342  
0.18744,0.18521,0.18997,0.18652,0.18252,0.17965,0.18836,0.18192,0.1844  
3,0.18074,0.1966,0.19063,0.17952,0.18935,0.19141,0.18648,0.17744,0.179  
88,0.19935,0.18806,0.32002,0.38436,0.33825,0.35961,0.18279,0.17951,0.2  
018,0.18736,0.18962,0.19621,0.19443,0.18959,0.18865,0.18961,0.19773,0.  
19427,0.18587,0.19316,0.18311,0.4602,0.33731,0.33664,0.40057,0.26609,0  
.35974,0.36546,0.18388,0.19006,0.19299,0.19227,0.17649,0.1854,0.182,0.  
17816,0.17989,0.18006,0.18655,0.18419,0.19303,0.17958,0.18725,0.44647,  
0.45825,0.3662,0.36255,0.35958,0.34943,0.29862,0.35623,0.31751,0.32965  
,0.19747,0.18731,0.18475,0.18113,0.17865,0.1858,0.17232,0.18266,0.1883  
7,0.18563,0.1712,0.18594,0.18979,0.18782,0.19153,0.49819,0.49741,0.454  
76,0.31387,0.28094,0.29437,0.28952,0.36635,0.36952,0.29186,0.33434,0.2  
9419,0.18615,0.19625,0.19187,0.19094,0.19383,0.1935,0.19179,0.19368,0.  
18637,0.19071,0.18498,0.19162,0.18826,0.17355,0.18846,0.18206,0.48698,  
0.36749,0.48215,0.49894,0.33641,0.31798,0.35399,0.27236,0.3135,0.27867  
,0.36835,0.32917,0.39369,0.33555,0.19105,0.18745,0.18512,0.18932,0.185  
28,0.18115,0.18695,0.18258,0.19014,0.19547,0.19558,0.19087,0.18875,0.1  
9171,0.1828,0.18992,0.50086,0.47631,0.50761,0.53467,0.41991,0.56435,0.  
43697,0.31768,0.34112,0.3099,0.38056,0.3403,0.29252,0.33273,0.29838,0.  
28791,0.18048,0.18428,0.19326,0.18198,0.19571,0.19319,0.18633,0.18843,

0.18582,0.18449,0.18885,0.19201,0.19015,0.1939,0.17859,0.18878,0.18019  
,0.49928,0.47313,0.49032,0.54451,0.42328,0.51296,0.36217,0.35141,0.302  
74,0.32677,0.32383,0.29402,0.28512,0.32434,0.30208,0.36142,0.28543,0.1  
8237,0.18638,0.17962,0.18477,0.19051,0.18057,0.18657,0.19332,0.18854,0  
.1865,0.18976,0.19586,0.18475,0.12712,0.13804,0.13133,0.19087,0.48706,  
0.42629,0.49626,0.52653,0.35097,0.45583,0.48841,0.30124,0.26853,0.2984  
6,0.34909,0.31214,0.33025,0.35683,0.37513,0.35766,0.31297,0.40821,0.18  
363,0.19134,0.19459,0.18396,0.18738,0.1867,0.17755,0.18197,0.19084,0.1  
9139,0.19765,0.12895,0.12684,0.12573,0.13137,0.12113,0.13114,0.18358,0  
.40204,0.47567,0.49067,0.47291,0.50888,0.46707,0.49782,0.32274,0.3087,  
0.36312,0.35933,0.2785,0.32743,0.32342,0.31651,0.28356,0.37603,0.26574  
,0.18706,0.18813,0.18135,0.19848,0.19406,0.19021,0.1874,0.1824,0.18396  
,0.12946,0.12884,0.12382,0.12622,0.13194,0.11868,0.13786,0.12623,0.129  
59,0.18269,0.46979,0.51496,0.50422,0.55171,0.51439,0.4074,0.38843,0.33  
853,0.30364,0.32652,0.27534,0.40043,0.26557,0.35155,0.29847,0.35018,0.  
34365,0.32866,0.32866,0.18822,0.18909,0.18874,0.18317,0.1887,0.18437,0  
.12169,0.13263,0.12411,0.13436,0.13427,0.11411,0.13486,0.12866,0.1399,  
0.11722,0.12353,0.13164,0.52752,0.42945,0.43281,0.53085,0.49998,0.4164  
9,0.44777,0.35644,0.35101,0.28795,0.3028,0.34311,0.30279,0.33096,0.345  
04,0.34322,0.38459,0.34143,0.29608,0.18553,0.18062,0.18879,0.12486,0.1  
3414,0.13353,0.13056,0.12269,0.12192,0.11651,0.1431,0.13519,0.10932,0.  
12193,0.13567,0.12174,0.12531,0.14782,0.49991,0.37916,0.50101,0.60029,  
0.56675,0.49228,0.4089,0.46167,0.42687,0.30295,0.30882,0.27493,0.36732  
,0.3719,0.30596,0.3803,0.28513,0.41898,0.36404,0.35013,0.12012,0.11372  
,0.13836,0.11528,0.12908,0.13625,0.12984,0.12364,0.1247,0.13026,0.1295  
3,0.12847,0.12766,0.12986,0.12294,0.13812,0.1188,0.11057,0.41099,0.488  
55,0.59532,0.43307,0.41449,0.55095,0.49428,0.49794,0.41956,0.29887,0.3  
6008,0.29418,0.2512,0.26504,0.25437,0.2401,0.23892,0.22654,0.20528,0.3  
0959,0.13009,0.10518,0.13039,0.11758,0.13482,0.1291,0.12651,0.12936,0.  
13399,0.12487,0.1337,0.12002,0.12881,0.12771,0.12951,0.13257,0.13066,0  
.13099,0.47607,0.50555,0.54593,0.60906,0.58463,0.44753,0.51637,0.60008  
,0.47453,0.33096,0.24017,0.25825,0.23394,0.22634,0.24747,0.23452,0.236  
27,0.26916,0.25447,0.25048,0.13172,0.11836,0.12351,0.12456,0.11802,0.1  
2399,0.12483,0.12451,0.12225,0.1182,0.11936,0.12896,0.11651,0.10619,0.  
12577,0.12847,0.11237,0.11896,0.42712,0.43107,0.37877,0.45476,0.54253,  
0.45242,0.61,0.26749,0.28419,0.2963,0.23435,0.27576,0.27164,0.2569,0.2  
3253,0.2565,0.25785,0.2118,0.21268,0.24874,0.12699,0.12893,0.12976,0.1  
1868,0.12616,0.1225,0.12098,0.12796,0.12218,0.11715,0.1294,0.1267,0.12  
37,0.13,0.12166,0.13491,0.13489,0.13436,0.51403,0.52807,0.48722,0.4925  
8,0.46263,0.52496,0.29418,0.26752,0.2823,0.28246,0.23628,0.21794,0.252  
35,0.25714,0.24029,0.26388,0.23347,0.21518,0.2721,0.2454,0.13334,0.114  
64,0.12489,0.12665,0.12648,0.12362,0.12743,0.12299,0.11937,0.1356,0.12  
88,0.13393,0.12768,0.13662,0.12896,0.12387,0.12503,0.13277,0.51257,0.4  
4431,0.48711,0.48132,0.45961,0.29069,0.28781,0.2853,0.24497,0.21112,0.  
28256,0.24535,0.25166,0.22349,0.25465,0.22519,0.25228,0.24556,0.23577,  
0.24384,0.12721,0.14191,0.12891,0.12634,0.13551,0.1326,0.13495,0.1166,  
0.12605,0.12693,0.13219,0.13083,0.11938,0.13355,0.14604,0.12572,0.1228  
8,0.11003,0.43996,0.57932,0.46686,0.28216,0.29557,0.23365,0.28069,0.30  
759,0.29077,0.17107,0.29372,0.21684,0.2346,0.24296,0.24462,0.23823,0.2  
6999,0.27111,0.22142,0.27277,0.12252,0.11586,0.1357,0.11583,0.13357,0.  
11768,0.12822,0.12876,0.11263,0.12493,0.14827,0.13136,0.13029,0.12472,  
0.12709,0.12352,0.12509,0.12244,0.44325,0.27386,0.27881,0.2814,0.20921

,0.25758,0.24792,0.20713,0.21533,0.20728,0.2696,0.2505,0.20555,0.21991  
,0.24703,0.24598,0.2111,0.26571,0.27879,0.13255,0.13048,0.13261,0.1284  
1,0.12428,0.11097,0.1267,0.1329,0.12443,0.11981,0.12074,0.12536,0.1159  
7,0.12409,0.13041,0.12583,0.12402,0.067136,0.31741,0.26049,0.32363,0.2  
4357,0.30613,0.27305,0.23836,0.30339,0.26214,0.23042,0.2237,0.28492,0.  
23627,0.24297,0.23059,0.23632,0.24784,0.26751,0.25051,0.12871,0.13509,  
0.12938,0.12448,0.11821,0.13379,0.12803,0.12341,0.12812,0.13111,0.1320  
2,0.12757,0.13103,0.12812,0.13138,0.13155,0.12105,0.071865,0.22768,0.2  
8279,0.27034,0.23933,0.31963,0.28244,0.18665,0.28493,0.25748,0.28896,0.  
.25696,0.24132,0.27184,0.24452,0.27384,0.22402,0.24113,0.22878,0.14919  
,0.12768,0.12898,0.14027,0.12401,0.13556,0.13063,0.12846,0.11858,0.139  
42,0.12251,0.13036,0.1269,0.13009,0.12594,0.12281,0.12876,0.13638,0.07  
2266,0.2694,0.24446,0.25698,0.30744,0.25121,0.22907,0.24418,0.28725,0.  
23876,0.251,0.24608,0.25077,0.28492,0.23829,0.2386,0.24675,0.22994,0.2  
9036,0.12362,0.12096,0.13689,0.132,0.13664,0.12586,0.11911,0.12801,0.1  
2567,0.1298,0.12998,0.12528,0.12045,0.12943,0.12559,0.12843,0.12302,0.  
071232,0.074549,0.070481,0.21973,0.22671,0.23825,0.26713,0.26594,0.203  
19,0.21577,0.29536,0.24203,0.20275,0.2605,0.27106,0.24296,0.23708,0.19  
485,0.13071,0.12616,0.12821,0.13191,0.12877,0.11444,0.12725,0.12985,0.  
13173,0.12941,0.12478,0.11196,0.13711,0.12176,0.1103,0.1289,0.12698,0.  
11961,0.065116,0.068352,0.069514,0.067161,0.19784,0.27938,0.23439,0.27  
115,0.24154,0.25866,0.22935,0.23088,0.27465,0.24979,0.26114,0.26423,0.  
12013,0.14913,0.1368,0.13056,0.13597,0.11308,0.13011,0.13048,0.13868,0.  
.14464,0.12216,0.12795,0.11365,0.12927,0.12871,0.11661,0.12296,0.10963  
,0.12294,0.12251,0.073416,0.065155,0.06798,0.062568,0.067045,0.067753,  
0.23101,0.29806,0.21847,0.21451,0.27919,0.17827,0.27329,0.29428,0.1304  
2,0.11723,0.10433,0.1416,0.12728,0.12484,0.1266,0.12027,0.12985,0.1472  
,0.12282,0.128,0.13462,0.13105,0.14069,0.12244,0.12501,0.13186,0.12202  
,0.12577,0.12768,0.14222,0.12457,0.065031,0.065853,0.073066,0.053162,0.  
.066582,0.063238,0.27181,0.31277,0.31377,0.32353,0.28942,0.070159,0.06  
6619,0.12203,0.12454,0.11423,0.12599,0.12711,0.12928,0.11477,0.12795,0.  
.12151,0.12586,0.12741,0.11417,0.12494,0.1265,0.13567,0.13343,0.12666,  
0.12293,0.12791,0.10997,0.13057,0.073739,0.064608,0.07502,0.06424,0.06  
8369,0.072229,0.078806,0.06958,0.068373,0.072634,0.25106,0.30765,0.066  
027,0.063752,0.066964,0.062627,0.11932,0.12642,0.11928,0.12895,0.11009  
,0.13048,0.12657,0.12412,0.1278,0.11714,0.12186,0.12598,0.12231,0.1208  
6,0.12449,0.1311,0.13168,0.13247,0.1312,0.069909,0.065586,0.063984,0.0  
69624,0.073596,0.06176,0.062498,0.072321,0.069575,0.069514,0.070026,0.  
071427,0.064975,0.062441,0.067195,0.068441,0.068213,0.13198,0.12913,0.  
13071,0.12879,0.11716,0.1264,0.11893,0.12839,0.11709,0.12454,0.13286,0.  
.13153,0.12712,0.12771,0.11583,0.12972,0.061822,0.072012,0.077406,0.07  
3549,0.065912,0.061899,0.067679,0.068564,0.072494,0.068869,0.065674,0.  
064828,0.067559,0.065548,0.070572,0.062646,0.069885,0.070082,0.070876,  
0.13444,0.1194,0.12925,0.12323,0.11868,0.13849,0.12339,0.1303,0.12948,  
0.12436,0.12638,0.12904,0.13034,0.069883,0.061261,0.067495,0.06948,0.0  
63631,0.065328,0.065077,0.063713,0.073817,0.062326,0.071324,0.060429,0.  
.064771,0.063078,0.066965,0.065514,0.06919,0.064554,0.06884,0.07501,0.  
070624,0.1241,0.12782,0.12268,0.11707,0.14729,0.12444,0.12761,0.12739,  
0.12681,0.063108,0.066566,0.071966,0.055785,0.068842,0.069323,0.068952  
,0.074751,0.06626,0.06496,0.071214,0.071685,0.067333,0.07867,0.068031,  
0.068958,0.069203,0.065761,0.06928,0.060525,0.063928,0.073471,0.070405  
,0.068154,0.071772,0.12524,0.12058,0.13019,0.1312,0.067404,0.070359,0.

070154,0.069481,0.066273,0.070616,0.062702,0.064871,0.066992,0.065954,  
0.075524,0.06498,0.064629,0.069142,0.064027,0.072653,0.071255,0.065414  
,0.064391,0.068292,0.065541,0.068564,0.069918,0.062264,0.064456,0.0677  
77,0.057914,0.063367,0.066954,0.06942,0.066009,0.064037,0.072853,0.062  
881,0.068529,0.066539,0.06855,0.067134,0.066996,0.064096,0.067252,0.06  
3828,0.072201,0.066874,0.06684,0.065642,0.071903,0.068631,0.068324,0.0  
61487,0.071693,0.063631,0.073851,0.06777,0.06326,0.072909,0.068342,0.0  
73087,0.071212,0.065459,0.070801,0.065308,0.064539,0.070521,0.069538,0  
.070048,0.069339,0.069383,0.068061,0.070749,0.063018,0.071382,0.071055  
,0.0674,0.066298,0.066087,0.07833,0.071426,0.070325,0.061532,0.076553,  
0.067718,0.068767,0.074488,0.066857,0.068023,0.065511,0.065195,0.06792  
9,0.071693,0.067285,0.068138,0.067876,0.062346,0.068569,0.072796,0.070  
924,0.070827,0.066236,0.067194,0.066659,0.060524,0.065497,0.072317,0.0  
64507,0.069494,0.06737,0.071073,0.072799,0.068624,0.063259,0.067652,0.  
070616,0.064242,0.069354,0.067994,0.069894,0.065886,0.06153,0.067667,0  
.065123,0.068485,0.066969,0.066614,0.071167,0.073018,0.065759,0.077936  
,0.064001,0.064415,0.074085,0.062652,0.067745,0.063333,0.063241,0.0707  
34,0.06735,0.068844,0.059218,0.06608,0.062397,0.063766,0.061456,0.0787  
16,0.067584,0.070034,0.06558,0.068984,0.067609,0.070936,0.069563,0.069  
051,0.061165,0.062921,0.069162,0.068819,0.068684,0.067364,0.067352,0.0  
73571,0.070345,0.070082,0.066242,0.065511,0.065159,0.071687,0.059801,0  
.070198,0.063871,0.066186,0.063103,0.068189,0.068363,0.067873,0.072456  
,0.070054,0.064162,0.066612,0.067585,0.061702,0.066565,0.069171,0.0635  
14,0.071296,0.069782,0.070201,0.063706,0.06772,0.063525,0.070219,0.062  
557,0.072258,0.07406,0.066884,0.064187  
0.1897,0.19127,0.19833,0.1887,0.18382,0.18341,0.19518,0.18762,0.18821,  
0.18741,0.20127,0.19385,0.18594,0.19163,0.1979,0.19199,0.18245,0.18978  
,0.20144,0.19209,0.30564,0.37963,0.32729,0.33994,0.19321,0.18208,0.209  
05,0.19003,0.19416,0.19661,0.19841,0.1929,0.19138,0.19095,0.19418,0.19  
742,0.19062,0.19842,0.19087,0.41148,0.32592,0.30214,0.38638,0.25156,0.  
34787,0.35624,0.18674,0.19454,0.19356,0.19738,0.18049,0.19047,0.18313,  
0.18153,0.18567,0.18403,0.18631,0.18982,0.1936,0.18323,0.1939,0.36974,  
0.40608,0.32526,0.33338,0.35359,0.33915,0.3015,0.31668,0.30272,0.32177  
,0.20213,0.18724,0.18976,0.18836,0.18375,0.18742,0.17953,0.18977,0.194  
28,0.18716,0.17632,0.18602,0.19307,0.18845,0.19431,0.46808,0.45256,0.3  
9939,0.30576,0.2465,0.27965,0.27533,0.33199,0.36122,0.28374,0.29676,0.  
28056,0.18875,0.19937,0.1961,0.1896,0.19675,0.19691,0.19492,0.19686,0.  
19134,0.19703,0.193,0.19894,0.19458,0.17892,0.19531,0.18781,0.46517,0.  
33862,0.4326,0.42447,0.32326,0.30356,0.30057,0.26544,0.2983,0.27371,0.  
35845,0.30787,0.3759,0.29963,0.19527,0.19262,0.18905,0.19139,0.18922,0  
.18358,0.18977,0.1858,0.19418,0.19687,0.20173,0.19668,0.19571,0.19353,  
0.18546,0.1948,0.45485,0.43442,0.50935,0.49571,0.43083,0.50109,0.40739  
,0.28699,0.31993,0.27913,0.3711,0.31556,0.28421,0.31856,0.29085,0.2856  
9,0.18435,0.185,0.19569,0.19017,0.19682,0.2,0.18582,0.19081,0.1914,0.1  
8942,0.19197,0.19621,0.19491,0.19632,0.18455,0.19605,0.18627,0.41646,0  
.42116,0.45426,0.47664,0.39057,0.49688,0.33461,0.32519,0.27962,0.35234  
,0.27499,0.28545,0.26609,0.31808,0.29116,0.33958,0.27274,0.1917,0.1878  
7,0.18038,0.18906,0.19172,0.185,0.19111,0.19326,0.19335,0.1931,0.19549  
,0.19907,0.19013,0.12339,0.14027,0.13143,0.19585,0.4359,0.36937,0.4051  
4,0.53615,0.34211,0.4513,0.42089,0.29095,0.25801,0.28798,0.32619,0.284  
13,0.33341,0.33531,0.35099,0.32308,0.28051,0.38574,0.1927,0.19568,0.19  
513,0.19026,0.18813,0.19303,0.185,0.18326,0.1986,0.19553,0.20551,0.126

86,0.1239,0.12289,0.13066,0.11742,0.12858,0.19217,0.34773,0.45805,0.44  
442,0.42196,0.48874,0.40188,0.4267,0.32396,0.27011,0.34285,0.3381,0.26  
716,0.32529,0.3079,0.28031,0.23776,0.35015,0.26044,0.19192,0.19802,0.1  
8582,0.20089,0.19561,0.1939,0.19388,0.19063,0.18604,0.1273,0.12518,0.1  
1705,0.12443,0.13064,0.11378,0.13352,0.12241,0.12705,0.18444,0.41607,0  
.41116,0.44924,0.55124,0.4565,0.33465,0.37323,0.31519,0.27491,0.30519,  
0.27151,0.37599,0.27126,0.33061,0.26191,0.3225,0.32191,0.29442,0.29756  
,0.19006,0.19203,0.19366,0.1851,0.19685,0.19004,0.12,0.13107,0.12269,0  
.13116,0.13303,0.10958,0.13587,0.12706,0.13715,0.11385,0.12078,0.13114  
,0.49032,0.3593,0.44755,0.51621,0.38913,0.35963,0.43647,0.34979,0.3489  
7,0.27349,0.30568,0.32787,0.29041,0.28814,0.35521,0.31974,0.34781,0.33  
034,0.28039,0.18404,0.18593,0.19462,0.12269,0.13143,0.12957,0.12702,0.  
12133,0.12038,0.11275,0.1405,0.13506,0.10781,0.12064,0.13391,0.11992,0  
.12161,0.14886,0.46663,0.31962,0.43395,0.5685,0.52021,0.44315,0.37913,  
0.41142,0.4016,0.28036,0.27951,0.25467,0.35247,0.33247,0.285,0.37463,0  
.27348,0.38601,0.34384,0.31322,0.11703,0.11155,0.13631,0.11112,0.12781  
,0.13415,0.12527,0.123,0.12512,0.1287,0.12704,0.12736,0.12479,0.12838,  
0.12034,0.13732,0.11628,0.10594,0.40492,0.41889,0.55582,0.35644,0.3838  
1,0.47104,0.46172,0.40859,0.35595,0.28802,0.345,0.28173,0.23058,0.2404  
8,0.25325,0.23678,0.2255,0.19727,0.19632,0.28404,0.12819,0.1017,0.1281  
7,0.11464,0.1335,0.12721,0.12422,0.12885,0.1318,0.12321,0.1296,0.11505  
,0.12759,0.12423,0.12681,0.12977,0.12456,0.12924,0.44627,0.46422,0.492  
56,0.55067,0.52344,0.44615,0.47958,0.53476,0.46487,0.30973,0.23003,0.2  
5589,0.22084,0.21862,0.22681,0.20886,0.21642,0.25321,0.22571,0.25233,0  
.12974,0.11376,0.11976,0.12248,0.11529,0.1237,0.12568,0.12457,0.1185,0  
.1169,0.11507,0.1261,0.11263,0.10111,0.12453,0.12702,0.10978,0.1154,0.  
41598,0.37477,0.37793,0.47155,0.52206,0.4161,0.51634,0.24381,0.25921,0  
.26038,0.22235,0.26573,0.24587,0.23292,0.21331,0.23809,0.23057,0.19578  
,0.20035,0.23734,0.12454,0.12604,0.12766,0.11465,0.12524,0.12069,0.118  
67,0.1246,0.119,0.11548,0.12566,0.12535,0.12063,0.12638,0.11984,0.1319  
6,0.13282,0.13252,0.48029,0.51121,0.41821,0.43583,0.44835,0.457,0.2721  
4,0.23317,0.25605,0.27045,0.21524,0.20364,0.23013,0.24356,0.23469,0.22  
063,0.23162,0.19387,0.25265,0.22582,0.13086,0.11081,0.12064,0.12374,0.  
12264,0.12231,0.12576,0.12159,0.11897,0.13196,0.12546,0.13216,0.12884,  
0.13614,0.12728,0.11979,0.12428,0.13074,0.43421,0.40238,0.45497,0.4440  
1,0.42581,0.26055,0.253,0.26658,0.23064,0.19136,0.2464,0.24267,0.24648  
,0.22093,0.22634,0.2106,0.22744,0.22691,0.22596,0.2283,0.12674,0.14522  
,0.1268,0.12337,0.1312,0.1282,0.13324,0.11097,0.12283,0.12552,0.12696,  
0.12945,0.1163,0.13238,0.14509,0.12367,0.12049,0.10656,0.40641,0.54156  
,0.40153,0.26284,0.28812,0.22588,0.26225,0.28101,0.26085,0.13573,0.249  
56,0.20177,0.21369,0.23281,0.23215,0.22344,0.24657,0.24785,0.21366,0.2  
4662,0.1204,0.11293,0.13405,0.11518,0.1313,0.1127,0.1253,0.12653,0.108  
96,0.12213,0.14677,0.12866,0.12653,0.12291,0.12311,0.12187,0.12277,0.1  
1813,0.38813,0.25908,0.25329,0.25372,0.19285,0.24781,0.22542,0.19955,0  
.20761,0.18873,0.25846,0.23266,0.19151,0.20877,0.23535,0.24169,0.19372  
,0.24934,0.24549,0.13216,0.13041,0.13045,0.12761,0.12129,0.10413,0.123  
01,0.13071,0.12119,0.11747,0.11772,0.12398,0.11168,0.12186,0.1281,0.12  
435,0.12152,0.060184,0.29436,0.24578,0.31532,0.23516,0.27506,0.23881,0  
.2195,0.2719,0.25307,0.2205,0.2109,0.26536,0.22369,0.22886,0.22601,0.2  
4312,0.23504,0.2531,0.21252,0.12534,0.13282,0.127,0.12218,0.11432,0.13  
15,0.12686,0.11983,0.12242,0.12655,0.13023,0.12739,0.12776,0.12267,0.1  
2963,0.12707,0.12179,0.062189,0.20942,0.27754,0.23659,0.22266,0.28479,

0.23975,0.17677,0.27309,0.24164,0.25402,0.23879,0.23001,0.23774,0.2354  
7,0.243,0.20062,0.22672,0.20189,0.15031,0.12528,0.12688,0.13971,0.1239  
6,0.13109,0.12975,0.12514,0.11773,0.1387,0.12109,0.12671,0.12572,0.129  
47,0.12366,0.12034,0.12541,0.13417,0.064185,0.24272,0.21033,0.23979,0.  
27816,0.21083,0.214,0.23621,0.25823,0.2251,0.22809,0.22549,0.22883,0.2  
6349,0.22626,0.2291,0.22527,0.20363,0.2766,0.11961,0.11936,0.13651,0.1  
2661,0.13451,0.12533,0.11772,0.1253,0.12253,0.12639,0.12864,0.12446,0.  
11822,0.12536,0.12133,0.12829,0.11897,0.063904,0.064883,0.060275,0.200  
26,0.23882,0.21304,0.24358,0.26914,0.20035,0.19581,0.25855,0.1915,0.20  
064,0.24928,0.25091,0.23884,0.22512,0.16893,0.13251,0.12195,0.12799,0.  
13255,0.12616,0.11018,0.12339,0.12635,0.1266,0.12327,0.12379,0.10831,0  
.13702,0.11891,0.10525,0.12848,0.12631,0.11773,0.058746,0.060205,0.058  
099,0.057455,0.16663,0.24629,0.21221,0.25351,0.22331,0.24547,0.21257,0  
.20907,0.24979,0.24095,0.23674,0.24941,0.11591,0.14968,0.1349,0.12651,  
0.13487,0.1083,0.12771,0.12887,0.13722,0.14399,0.1208,0.12522,0.10897,  
0.12745,0.12586,0.11264,0.12057,0.10587,0.11838,0.12077,0.064255,0.053  
403,0.056097,0.054372,0.060116,0.059226,0.2227,0.27575,0.19144,0.20223  
,0.26857,0.169,0.241,0.26489,0.12866,0.1155,0.099704,0.1395,0.12546,0.  
1215,0.12501,0.11741,0.12806,0.14634,0.11822,0.12637,0.13043,0.12958,0  
.13916,0.11983,0.1223,0.13053,0.11833,0.12417,0.12132,0.13971,0.1236,0  
.055921,0.054589,0.063113,0.045466,0.060154,0.055372,0.24406,0.28886,0  
.27107,0.28616,0.27005,0.059824,0.05952,0.12084,0.12407,0.11134,0.1235  
6,0.12239,0.12835,0.11286,0.1244,0.12073,0.12198,0.12687,0.11122,0.123  
7,0.12279,0.13424,0.12955,0.12464,0.12135,0.12559,0.10475,0.13017,0.06  
3778,0.053167,0.068337,0.057022,0.057698,0.062964,0.067344,0.062685,0.  
059931,0.065287,0.22086,0.27738,0.058165,0.051958,0.054571,0.053662,0.  
11976,0.12415,0.11491,0.12548,0.10736,0.12839,0.12353,0.11998,0.12406,  
0.1142,0.12078,0.1219,0.11825,0.11764,0.12095,0.12696,0.12778,0.13039,  
0.12927,0.062216,0.05555,0.055325,0.058457,0.066899,0.055282,0.050913,  
0.062727,0.05799,0.060288,0.058962,0.06547,0.057325,0.056551,0.057908,  
0.0594,0.060658,0.12994,0.12641,0.12555,0.12561,0.11506,0.12276,0.1139  
6,0.12399,0.1161,0.12228,0.13179,0.12878,0.12265,0.12468,0.11109,0.128  
27,0.052622,0.062836,0.068089,0.063295,0.061227,0.056804,0.061914,0.06  
2254,0.063826,0.058562,0.059106,0.055306,0.061097,0.05584,0.062721,0.0  
55809,0.060927,0.060976,0.063019,0.1334,0.11717,0.12712,0.1216,0.11443  
,0.13788,0.11759,0.1299,0.12655,0.12078,0.12691,0.12284,0.12477,0.0611  
12,0.052496,0.057801,0.060005,0.054364,0.056301,0.054925,0.056692,0.06  
8575,0.054014,0.061368,0.049254,0.057233,0.053943,0.057012,0.056403,0.  
06232,0.056478,0.060854,0.065113,0.062762,0.1223,0.12734,0.12124,0.112  
72,0.14619,0.12333,0.12645,0.12323,0.12607,0.054681,0.058855,0.061765,  
0.048806,0.058093,0.061185,0.058817,0.065724,0.05523,0.054605,0.059078  
,0.063565,0.05794,0.069322,0.059315,0.061836,0.059483,0.059801,0.06255  
5,0.050625,0.053709,0.063838,0.060675,0.059865,0.063733,0.12245,0.1177  
3,0.12729,0.12877,0.057396,0.063163,0.06056,0.058958,0.056859,0.061935  
,0.055051,0.056349,0.059245,0.057321,0.066903,0.057822,0.054746,0.0626  
02,0.056652,0.063553,0.062062,0.057502,0.056373,0.060598,0.05811,0.062  
01,0.059825,0.054812,0.060313,0.060444,0.054291,0.053364,0.062273,0.06  
3233,0.05485,0.054847,0.065551,0.056094,0.061262,0.057575,0.062238,0.0  
56452,0.056042,0.058461,0.059896,0.054767,0.062193,0.058211,0.060599,0  
.057243,0.060773,0.060998,0.062182,0.052405,0.06259,0.055942,0.067088,  
0.060237,0.056472,0.065663,0.059783,0.063081,0.062473,0.056949,0.06280  
1,0.056348,0.054136,0.062486,0.057418,0.063072,0.05925,0.061932,0.0597

02,0.062509,0.055491,0.064252,0.061485,0.057702,0.056136,0.057034,0.06  
8561,0.063691,0.062405,0.052584,0.067269,0.058595,0.059309,0.061819,0.  
059638,0.060465,0.058529,0.055078,0.060202,0.061941,0.057596,0.061798,  
0.060204,0.0526,0.062132,0.061374,0.061844,0.061983,0.055716,0.061956,  
0.060418,0.056556,0.057624,0.063489,0.056414,0.062805,0.058131,0.05808  
8,0.065588,0.060851,0.059411,0.063475,0.059288,0.057206,0.061006,0.057  
225,0.061858,0.054191,0.05473,0.058044,0.055144,0.058737,0.056195,0.05  
9362,0.06203,0.063094,0.059001,0.068706,0.055351,0.056493,0.064246,0.0  
56207,0.057452,0.055336,0.054727,0.059832,0.059618,0.059522,0.053174,0  
.057489,0.052885,0.055842,0.05432,0.06746,0.059966,0.060137,0.056129,0  
.060202,0.058055,0.064456,0.0635,0.060104,0.054573,0.05413,0.058308,0.  
060711,0.058381,0.061182,0.060406,0.063751,0.05989,0.061271,0.058715,0  
.0576,0.055013,0.064103,0.050359,0.059953,0.057446,0.056502,0.055702,0  
.058742,0.05665,0.060113,0.064322,0.062118,0.056039,0.05877,0.056639,0  
.051439,0.059098,0.059966,0.056267,0.062208,0.064101,0.062471,0.055213  
,0.057999,0.055545,0.062618,0.053942,0.065974,0.063689,0.058347,0.0605  
14

0.19178,0.1957,0.19872,0.19307,0.18594,0.18685,0.20199,0.19035,0.19033  
,0.19355,0.20206,0.19259,0.19072,0.19642,0.19591,0.19368,0.18808,0.187  
69,0.20254,0.19689,0.28169,0.3444,0.33615,0.32674,0.19424,0.18339,0.20  
928,0.19418,0.1912,0.19495,0.20316,0.19363,0.19105,0.19002,0.20052,0.1  
98,0.19357,0.20058,0.19303,0.44372,0.30613,0.28223,0.38565,0.23826,0.3  
307,0.34419,0.1928,0.19588,0.19382,0.20174,0.18413,0.19385,0.18907,0.1  
8362,0.18861,0.1877,0.19337,0.19276,0.19485,0.19193,0.19801,0.33382,0.  
41113,0.32835,0.32759,0.31923,0.30744,0.31086,0.31865,0.30299,0.31508,  
0.20235,0.19078,0.19582,0.19213,0.18428,0.19031,0.18294,0.19609,0.1928  
3,0.19295,0.17901,0.18635,0.19287,0.19059,0.19531,0.46748,0.38664,0.37  
862,0.30167,0.23697,0.29334,0.26164,0.3198,0.32915,0.27199,0.27537,0.2  
8503,0.19199,0.20002,0.20052,0.1931,0.1977,0.20181,0.19803,0.19774,0.1  
9458,0.19558,0.19562,0.19878,0.19355,0.18524,0.19817,0.19568,0.42808,0  
.33014,0.44049,0.38429,0.30793,0.29603,0.29804,0.26879,0.29595,0.2677,  
0.33864,0.29489,0.37361,0.27921,0.20022,0.1939,0.19177,0.19467,0.1939,  
0.18658,0.19451,0.18864,0.2001,0.19797,0.2035,0.19732,0.19813,0.19209,  
0.18646,0.19953,0.41636,0.40567,0.43555,0.44519,0.40974,0.5014,0.39234  
,0.26893,0.30346,0.27192,0.36118,0.31235,0.29023,0.28613,0.28483,0.267  
3,0.18855,0.18598,0.20028,0.19336,0.20183,0.20535,0.19034,0.19452,0.19  
526,0.19513,0.19487,0.20048,0.20138,0.19574,0.18859,0.19735,0.19087,0.  
39492,0.42229,0.42112,0.41773,0.40937,0.48059,0.30845,0.30976,0.26999,  
0.327,0.24222,0.28484,0.25743,0.33565,0.27783,0.33321,0.27197,0.19729,  
0.19125,0.18285,0.19018,0.19358,0.18674,0.18851,0.19727,0.19331,0.1940  
2,0.19973,0.20337,0.19875,0.12086,0.14038,0.12821,0.203,0.40912,0.3257  
5,0.37695,0.49381,0.36459,0.47812,0.39248,0.27786,0.24805,0.28494,0.30  
873,0.27048,0.33997,0.33649,0.32496,0.3127,0.26652,0.36726,0.19387,0.2  
004,0.19969,0.1884,0.19014,0.19841,0.18738,0.18325,0.2011,0.20186,0.20  
81,0.12536,0.12419,0.11928,0.12763,0.11658,0.1271,0.19535,0.31798,0.44  
798,0.39923,0.34639,0.43522,0.38451,0.3982,0.30441,0.27064,0.33411,0.3  
4506,0.24325,0.31689,0.29168,0.27524,0.22304,0.33534,0.26895,0.1947,0.  
19792,0.19517,0.20358,0.20237,0.19746,0.19678,0.19495,0.18402,0.12611,  
0.12211,0.11726,0.12165,0.12863,0.11045,0.13209,0.1217,0.12792,0.18552  
,0.38726,0.40459,0.42144,0.51206,0.41286,0.23335,0.33688,0.29543,0.266  
41,0.30485,0.28577,0.36536,0.25397,0.32996,0.26335,0.3222,0.29794,0.28  
139,0.29037,0.19307,0.19281,0.19817,0.18447,0.1994,0.19239,0.11939,0.1



2691,0.12165,0.12721,0.13254,0.10682,0.13353,0.1268,0.13682,0.11358,0.11824,0.13031,0.47153,0.35209,0.41141,0.47588,0.39586,0.35026,0.47256,0.31784,0.32452,0.27887,0.30161,0.33339,0.28463,0.25964,0.32099,0.31528,0.3345,0.31795,0.27153,0.19265,0.18769,0.19585,0.12015,0.12682,0.12888,0.12614,0.12221,0.12064,0.1112,0.14162,0.13613,0.10507,0.11889,0.13188,0.12058,0.11948,0.15011,0.43419,0.3151,0.40169,0.53214,0.4683,0.40083,0.35445,0.38065,0.35842,0.25935,0.27917,0.25406,0.32219,0.33632,0.27704,0.37263,0.26768,0.37204,0.33105,0.2833,0.11729,0.10806,0.13456,0.10995,0.1277,0.13379,0.1272,0.12004,0.12397,0.12547,0.12658,0.12522,0.12309,0.12687,0.12033,0.13645,0.11301,0.10536,0.38813,0.36905,0.50788,0.34598,0.35501,0.45136,0.44689,0.36422,0.35377,0.28221,0.32249,0.28915,0.21898,0.23832,0.23441,0.2471,0.23471,0.19361,0.19091,0.26071,0.12463,0.099283,0.12588,0.1105,0.13065,0.1245,0.12417,0.12554,0.12993,0.12094,0.12668,0.11364,0.12627,0.12356,0.12414,0.12713,0.1251,0.12588,0.4304,0.42082,0.44144,0.48749,0.48916,0.42085,0.45532,0.52455,0.41997,0.27754,0.22172,0.24115,0.21459,0.2077,0.22489,0.1941,0.2097,0.22831,0.22783,0.24443,0.12756,0.10984,0.11827,0.12208,0.11325,0.12091,0.12584,0.12701,0.11622,0.1134,0.11453,0.12648,0.11177,0.098049,0.12407,0.12389,0.10975,0.11337,0.46134,0.36263,0.36796,0.44353,0.49841,0.43411,0.48233,0.2329,0.2386,0.24773,0.20966,0.24534,0.23277,0.23365,0.22001,0.23127,0.23172,0.1879,0.20474,0.23772,0.12257,0.1249,0.12747,0.11339,0.12473,0.11878,0.11708,0.1217,0.11721,0.1116,0.12526,0.12511,0.11847,0.1248,0.11896,0.13231,0.13341,0.13169,0.43814,0.50279,0.4019,0.42681,0.4119,0.39514,0.25766,0.20693,0.23146,0.26335,0.21679,0.20663,0.20627,0.23738,0.21742,0.20735,0.22385,0.19775,0.2352,0.21054,0.12994,0.10895,0.11746,0.12035,0.12092,0.11931,0.12834,0.12056,0.11883,0.13009,0.1248,0.13581,0.12743,0.13784,0.12624,0.11779,0.12308,0.12842,0.44164,0.39145,0.39676,0.42438,0.39104,0.22488,0.23802,0.25433,0.22921,0.17698,0.23184,0.22537,0.23079,0.22094,0.22739,0.19346,0.22984,0.22037,0.23676,0.2225,0.12511,0.14682,0.1268,0.12262,0.12902,0.12648,0.12969,0.11005,0.12365,0.12043,0.12523,0.13102,0.11307,0.13118,0.1432,0.12554,0.11802,0.105,0.38035,0.52643,0.39201,0.24662,0.27223,0.19815,0.24395,0.27532,0.24208,0.1252,0.24092,0.20743,0.18932,0.23253,0.22215,0.20393,0.25034,0.25474,0.20442,0.24062,0.11783,0.11003,0.13439,0.11148,0.13195,0.11197,0.12571,0.12236,0.10426,0.12165,0.14351,0.12807,0.12735,0.1233,0.12131,0.11863,0.12059,0.11785,0.3674,0.25224,0.25309,0.22087,0.19844,0.24697,0.24704,0.20202,0.16631,0.1647,0.24453,0.22244,0.1927,0.1973,0.23035,0.22987,0.1739,0.26282,0.23072,0.1331,0.12957,0.12846,0.1237,0.11966,0.10179,0.12149,0.12748,0.11959,0.11476,0.11483,0.12338,0.10758,0.11786,0.12575,0.12443,0.12118,0.054687,0.28906,0.23125,0.30089,0.22813,0.24049,0.20097,0.22565,0.24879,0.20302,0.21388,0.20743,0.24817,0.21487,0.21195,0.2184,0.22844,0.2335,0.23435,0.20127,0.12412,0.12963,0.12742,0.12048,0.1113,0.13044,0.12388,0.11658,0.12158,0.12544,0.12917,0.12573,0.12364,0.12303,0.12929,0.12279,0.12125,0.053812,0.20641,0.23928,0.23325,0.19981,0.27315,0.2282,0.15599,0.2519,0.21628,0.25184,0.22517,0.21759,0.23039,0.2297,0.22463,0.20912,0.21516,0.18948,0.15005,0.12167,0.12512,0.13737,0.12407,0.12945,0.12828,0.12371,0.11575,0.13897,0.11808,0.12337,0.12306,0.12645,0.12086,0.11656,0.12429,0.13578,0.055832,0.20519,0.19743,0.23171,0.3091,0.20163,0.20076,0.22397,0.23329,0.2148,0.21163,0.22193,0.21725,0.2596,0.21497,0.22677,0.20472,0.18963,0.26106,0.11787,0.11763,0.13566,0.12376,0.132,0.12368,0.11615,0.1211,0.12021,0.12456,0.12642,0.12274,0.1177,0.125,0.11667,0.12869,0.1195,0.056612,0.0569

5,0.055824,0.1918,0.228,0.19989,0.23576,0.25684,0.20143,0.18791,0.2154  
5,0.19774,0.19565,0.2271,0.25396,0.21889,0.20845,0.17182,0.13154,0.119  
48,0.12588,0.13035,0.12499,0.10712,0.12179,0.12776,0.12276,0.12243,0.1  
232,0.10627,0.13718,0.11757,0.10134,0.12583,0.12649,0.11631,0.052964,0  
.053988,0.054048,0.050626,0.17052,0.22095,0.19962,0.21906,0.21803,0.24  
52,0.18877,0.18165,0.23794,0.22054,0.2189,0.2344,0.11424,0.15142,0.134  
53,0.12495,0.13342,0.10599,0.12678,0.12843,0.13701,0.14466,0.12014,0.1  
235,0.10494,0.12786,0.12179,0.10945,0.11932,0.10329,0.11679,0.12018,0.  
056604,0.044356,0.046032,0.052095,0.051672,0.050605,0.22361,0.27698,0.  
17367,0.17936,0.26245,0.15222,0.24222,0.24498,0.12762,0.11659,0.097383  
,0.13793,0.1226,0.12106,0.12238,0.11476,0.12657,0.14793,0.11883,0.1245  
8,0.13074,0.12757,0.14141,0.11718,0.12108,0.12649,0.11595,0.12436,0.11  
807,0.13979,0.12159,0.052018,0.050996,0.057607,0.037084,0.054187,0.050  
358,0.26385,0.26217,0.29979,0.29822,0.26387,0.053307,0.051988,0.12048,  
0.12332,0.10935,0.11998,0.12266,0.12554,0.11003,0.12152,0.11732,0.1202  
9,0.12395,0.10902,0.12079,0.12156,0.13233,0.12944,0.12411,0.11869,0.12  
139,0.099607,0.12826,0.056317,0.044504,0.060928,0.051021,0.048743,0.05  
8516,0.055245,0.057773,0.054867,0.055974,0.19413,0.27039,0.053182,0.04  
6376,0.049756,0.048353,0.11751,0.12433,0.11221,0.12438,0.1045,0.1253,0  
.11937,0.11618,0.12478,0.11473,0.11929,0.1219,0.11447,0.11727,0.1195,0  
.12679,0.12376,0.13135,0.12986,0.053753,0.052085,0.049876,0.052019,0.0  
60071,0.050442,0.046697,0.050724,0.053342,0.051399,0.053547,0.057033,0  
.053406,0.051011,0.052221,0.050527,0.054208,0.12929,0.12256,0.12345,0.  
12242,0.11261,0.12073,0.11292,0.12083,0.11422,0.12257,0.13058,0.1287,0  
.12462,0.12377,0.1078,0.12628,0.048743,0.05562,0.060803,0.059638,0.053  
403,0.047823,0.053845,0.052392,0.05677,0.052696,0.049899,0.050666,0.05  
3316,0.050326,0.058922,0.04873,0.054512,0.053634,0.057526,0.13394,0.11  
337,0.12699,0.1183,0.10972,0.13477,0.11948,0.12675,0.12449,0.12024,0.1  
2675,0.12158,0.12482,0.052472,0.050429,0.051414,0.055717,0.049391,0.05  
1062,0.051578,0.051299,0.061392,0.050834,0.054756,0.045019,0.051473,0.  
047388,0.051248,0.05221,0.054141,0.04874,0.053428,0.059761,0.055805,0.  
12033,0.12698,0.11942,0.11067,0.14434,0.12043,0.12438,0.12059,0.12352,  
0.049153,0.053583,0.053947,0.041396,0.048928,0.055975,0.053606,0.06159  
3,0.045879,0.047671,0.05289,0.057673,0.052293,0.062754,0.053219,0.0551  
12,0.054774,0.053491,0.057613,0.049097,0.048876,0.059484,0.053874,0.05  
2931,0.057584,0.12114,0.11238,0.12554,0.12556,0.049597,0.058122,0.0576  
71,0.050448,0.052364,0.054089,0.049806,0.0481,0.051252,0.05239,0.05895  
6,0.053144,0.051346,0.053618,0.05078,0.058087,0.051892,0.050897,0.0488  
53,0.05568,0.050023,0.052608,0.054785,0.050478,0.05215,0.054148,0.0484  
44,0.047927,0.056572,0.05637,0.051117,0.047129,0.060204,0.048556,0.055  
428,0.05303,0.05368,0.048516,0.050312,0.050754,0.051893,0.04976,0.0558  
49,0.051935,0.054217,0.048763,0.053178,0.056985,0.055041,0.04599,0.055  
803,0.04949,0.060829,0.053108,0.051336,0.059817,0.052573,0.05882,0.056  
911,0.051421,0.053865,0.050795,0.048271,0.05677,0.048712,0.057393,0.05  
3782,0.053623,0.049914,0.056666,0.051644,0.056251,0.055019,0.052287,0.  
048658,0.051505,0.061263,0.057748,0.055927,0.048674,0.060556,0.054725,  
0.05102,0.055204,0.053722,0.054824,0.051373,0.051485,0.056334,0.052227  
,0.051399,0.055035,0.05263,0.04154,0.057308,0.053935,0.055349,0.056934  
,0.048315,0.054156,0.057036,0.047818,0.048678,0.05681,0.048864,0.05635  
1,0.049625,0.053767,0.057962,0.056367,0.053465,0.058212,0.052016,0.052  
508,0.053068,0.049077,0.055523,0.049916,0.048401,0.051533,0.048838,0.0  
52991,0.047572,0.052594,0.05715,0.054576,0.050271,0.06444,0.048197,0.0

48703,0.057461,0.049718,0.054347,0.051261,0.051433,0.053592,0.053703,0.050413,0.046318,0.054558,0.044617,0.050018,0.051611,0.059886,0.055229,0.054103,0.051761,0.052818,0.054582,0.057085,0.05506,0.053567,0.047652,0.048839,0.053561,0.053763,0.051383,0.055011,0.053387,0.060814,0.052746,0.054324,0.050955,0.050389,0.048153,0.053808,0.044334,0.051621,0.050182,0.05348,0.05302,0.05527,0.05005,0.051068,0.057541,0.05327,0.048065,0.054061,0.051335,0.043098,0.055116,0.056571,0.052254,0.056323,0.056327,0.053836,0.048322,0.052052,0.051,0.054594,0.046086,0.056203,0.055326,0.052741,0.053964  
0.19298,0.19557,0.20231,0.19583,0.18886,0.18826,0.2026,0.19453,0.19024,0.20075,0.2057,0.1965,0.19304,0.19884,0.20053,0.1979,0.19267,0.19266,0.20359,0.19644,0.27204,0.32355,0.34109,0.31743,0.1977,0.18672,0.21176,0.20133,0.20006,0.19464,0.20371,0.19622,0.19456,0.19194,0.20155,0.2023,0.19926,0.20554,0.19517,0.48136,0.28317,0.26066,0.39389,0.23995,0.31685,0.33844,0.19393,0.19812,0.19616,0.20222,0.18757,0.19407,0.19173,0.18635,0.18941,0.18723,0.19616,0.19601,0.19449,0.19266,0.20509,0.31421,0.37599,0.3289,0.32069,0.3244,0.31187,0.31589,0.32055,0.29728,0.3155,0.20241,0.19633,0.1998,0.19542,0.19184,0.1967,0.18364,0.19604,0.19372,0.19523,0.18427,0.19188,0.19351,0.19233,0.1979,0.40077,0.42644,0.34368,0.29302,0.24279,0.28703,0.26511,0.30509,0.31028,0.25292,0.28369,0.27782,0.19441,0.19965,0.20168,0.19406,0.20149,0.20267,0.19454,0.20125,0.19742,0.20099,0.19544,0.19648,0.19714,0.18768,0.20021,0.19321,0.41395,0.30662,0.43048,0.38415,0.29981,0.31277,0.30967,0.28273,0.27295,0.25673,0.33289,0.29765,0.33483,0.27822,0.20419,0.19105,0.19631,0.19695,0.19651,0.18621,0.20025,0.19291,0.20177,0.2011,0.20019,0.2004,0.20028,0.19705,0.19333,0.20323,0.40467,0.37717,0.42898,0.44129,0.38276,0.50937,0.37279,0.26831,0.28926,0.27304,0.35867,0.29853,0.29778,0.29243,0.2827,0.25981,0.19388,0.18951,0.20216,0.19788,0.19854,0.21184,0.19793,0.19473,0.19511,0.2002,0.19677,0.19652,0.20319,0.2014,0.19395,0.19886,0.19328,0.42591,0.39009,0.41725,0.39663,0.39047,0.47591,0.28208,0.29518,0.25097,0.31302,0.22771,0.2779,0.26011,0.3181,0.28496,0.33392,0.27573,0.20223,0.19242,0.18503,0.18875,0.19443,0.18771,0.19297,0.19806,0.19507,0.1938,0.20323,0.20438,0.19994,0.11721,0.14192,0.12576,0.20546,0.39798,0.29674,0.36961,0.4371,0.34656,0.49193,0.41615,0.27733,0.26307,0.28118,0.26958,0.27871,0.31739,0.32497,0.31691,0.30237,0.24588,0.36252,0.19776,0.20674,0.2019,0.18741,0.19127,0.19876,0.19459,0.18581,0.20336,0.20754,0.20922,0.12281,0.12339,0.11817,0.12719,0.11805,0.12428,0.19914,0.31575,0.41223,0.4067,0.32112,0.40654,0.38166,0.39527,0.29672,0.26946,0.3202,0.35261,0.24021,0.31602,0.29239,0.28115,0.21633,0.32251,0.26504,0.19561,0.20128,0.19409,0.20774,0.20782,0.19717,0.19956,0.19766,0.18347,0.12765,0.12181,0.11696,0.12115,0.12667,0.11129,0.1328,0.12364,0.12723,0.18676,0.36934,0.39245,0.42518,0.45389,0.41753,0.22679,0.33009,0.28253,0.25097,0.30953,0.27131,0.35577,0.24552,0.30953,0.25945,0.31256,0.29456,0.29371,0.28294,0.19758,0.19338,0.20017,0.18588,0.1978,0.19278,0.11665,0.12601,0.12118,0.12746,0.13382,0.10774,0.13476,0.12643,0.1355,0.11219,0.11735,0.13118,0.50653,0.33249,0.3931,0.43272,0.37376,0.32782,0.43988,0.30166,0.28351,0.26608,0.28826,0.31462,0.28166,0.26627,0.32126,0.29797,0.33517,0.31798,0.27673,0.19627,0.18754,0.19848,0.11989,0.12675,0.12699,0.12587,0.12157,0.11931,0.11121,0.14414,0.1369,0.10351,0.1192,0.13172,0.11929,0.11777,0.14824,0.4236,0.29246,0.37954,0.47395,0.42825,0.36568,0.33395,0.40287,0.36747,0.25202,0.29284,0.25346,0.30258,0.34524,0.29213,0.36951,0.26126,0.33687,0.30367,0.28178,0.11763,0.11038,0

.13383,0.10694,0.12806,0.13426,0.12627,0.11749,0.12531,0.12424,0.12661  
,0.12308,0.11949,0.12744,0.11944,0.13702,0.11022,0.10522,0.39398,0.371  
38,0.48997,0.36219,0.37518,0.42523,0.45756,0.30682,0.3292,0.30199,0.33  
014,0.2808,0.20829,0.22537,0.21737,0.24653,0.23493,0.18216,0.18613,0.2  
5002,0.12493,0.097583,0.12177,0.11012,0.12884,0.12504,0.12187,0.12294,  
0.12853,0.11888,0.12797,0.11098,0.12335,0.12293,0.12211,0.1252,0.12664  
,0.12449,0.44168,0.40383,0.43021,0.47014,0.46625,0.40298,0.4486,0.4596  
3,0.38349,0.27826,0.21518,0.24664,0.19672,0.20299,0.22878,0.20011,0.17  
842,0.21188,0.21847,0.23001,0.1279,0.11054,0.1145,0.12097,0.11165,0.12  
042,0.12372,0.12527,0.11438,0.11314,0.11607,0.12553,0.11061,0.095908,0  
.12083,0.123,0.1081,0.11291,0.42733,0.36707,0.38734,0.42322,0.4501,0.4  
0087,0.42567,0.21934,0.24774,0.23035,0.21262,0.22344,0.22675,0.22448,0  
.23052,0.22357,0.23278,0.18654,0.20008,0.24017,0.12292,0.12349,0.12722  
,0.11088,0.12668,0.11846,0.11678,0.1201,0.11765,0.11096,0.12803,0.1251  
6,0.11632,0.12422,0.11996,0.13166,0.13333,0.12934,0.42041,0.49552,0.35  
417,0.43096,0.3757,0.34377,0.24264,0.21509,0.2337,0.24118,0.21033,0.19  
074,0.2065,0.23259,0.1988,0.18037,0.21325,0.19599,0.22969,0.20032,0.12  
811,0.10598,0.11637,0.12027,0.12047,0.11683,0.12947,0.1205,0.11724,0.1  
2875,0.12619,0.14,0.1259,0.14111,0.1248,0.11608,0.12285,0.12905,0.4397  
3,0.41612,0.32228,0.39901,0.36176,0.20464,0.21334,0.2407,0.21342,0.192  
63,0.20889,0.21758,0.22905,0.22655,0.2164,0.17618,0.22541,0.21796,0.24  
209,0.23498,0.12548,0.14601,0.12517,0.12281,0.1295,0.12504,0.12922,0.1  
089,0.12479,0.11908,0.12342,0.13107,0.11249,0.13009,0.14195,0.12378,0.  
11867,0.10239,0.34516,0.4937,0.3598,0.20555,0.26886,0.20167,0.23743,0.  
28332,0.24752,0.12402,0.25356,0.20946,0.18471,0.22512,0.21446,0.18302,  
0.2415,0.24352,0.19619,0.23423,0.1174,0.10887,0.13435,0.10962,0.12803,  
0.11007,0.12525,0.12353,0.1029,0.11957,0.14156,0.12997,0.12668,0.12391  
,0.12069,0.11761,0.12189,0.11645,0.34619,0.24195,0.2429,0.21436,0.1768  
,0.22418,0.22652,0.19068,0.16321,0.14315,0.24123,0.22308,0.19243,0.196  
98,0.22977,0.2135,0.17364,0.24648,0.21439,0.13297,0.12759,0.12762,0.12  
118,0.11946,0.10043,0.12156,0.1256,0.11633,0.11407,0.11586,0.12282,0.1  
0691,0.11841,0.12223,0.12602,0.12138,0.050477,0.27292,0.21017,0.31429,  
0.21931,0.20758,0.17964,0.21734,0.22987,0.20714,0.21446,0.19258,0.2222  
6,0.20751,0.20482,0.21232,0.21274,0.23428,0.22502,0.2009,0.12511,0.126  
84,0.12838,0.12015,0.1103,0.12958,0.12274,0.11635,0.12234,0.12477,0.12  
693,0.12387,0.124,0.12307,0.12935,0.1229,0.12187,0.050526,0.20977,0.24  
658,0.21268,0.17656,0.25812,0.21722,0.14188,0.24193,0.20934,0.22164,0.  
2258,0.20991,0.22434,0.22449,0.22,0.20594,0.19979,0.19643,0.14944,0.12  
296,0.12356,0.13576,0.12154,0.12937,0.12771,0.12717,0.11579,0.13842,0.  
118,0.12103,0.12395,0.12558,0.11697,0.11791,0.12443,0.1341,0.0486,0.19  
947,0.19476,0.225,0.29818,0.18814,0.19135,0.20166,0.20157,0.20186,0.19  
853,0.22045,0.21727,0.26258,0.20452,0.22537,0.20158,0.19693,0.26184,0.  
11768,0.11357,0.13523,0.12327,0.13082,0.12099,0.11581,0.12068,0.11823,  
0.12387,0.1254,0.11961,0.1142,0.12323,0.11694,0.12968,0.11754,0.052974  
,0.052889,0.049372,0.184,0.24212,0.19724,0.22803,0.24501,0.19336,0.208  
53,0.21003,0.20591,0.19843,0.23203,0.2394,0.20766,0.19981,0.15961,0.13  
202,0.11834,0.12486,0.13045,0.12562,0.107,0.11964,0.12462,0.12246,0.11  
871,0.12345,0.10344,0.1391,0.11554,0.099723,0.12389,0.12586,0.11416,0.  
047255,0.049452,0.049169,0.046702,0.16117,0.22285,0.18979,0.2262,0.201  
55,0.24353,0.16833,0.17951,0.20541,0.21011,0.18521,0.23156,0.11291,0.1  
4965,0.13625,0.12282,0.13281,0.10475,0.12326,0.12666,0.13501,0.14204,0  
.1189,0.12194,0.10213,0.12638,0.11975,0.10786,0.11702,0.10422,0.11591,

0.1202,0.051924,0.042859,0.044389,0.050692,0.049514,0.049703,0.22848,0  
.2479,0.16413,0.18366,0.25588,0.15017,0.23746,0.22157,0.12456,0.11585,  
0.096589,0.13653,0.12115,0.11873,0.12108,0.11319,0.12475,0.14654,0.117  
03,0.12326,0.13236,0.12916,0.14224,0.11554,0.11778,0.12402,0.11482,0.1  
2336,0.11616,0.13869,0.12279,0.050168,0.048399,0.05228,0.034735,0.0510  
37,0.046203,0.26141,0.24081,0.29982,0.28721,0.2557,0.048174,0.048426,0  
.12011,0.12198,0.1074,0.11831,0.12023,0.12415,0.11078,0.11995,0.11444,  
0.12102,0.12313,0.1078,0.11904,0.12017,0.13226,0.12652,0.12412,0.11786  
,0.12138,0.098065,0.12762,0.049439,0.040677,0.058772,0.047922,0.046457  
,0.053621,0.049633,0.0525,0.049962,0.049812,0.20127,0.23502,0.047227,0  
.042678,0.045243,0.040059,0.11359,0.12434,0.10861,0.12219,0.10333,0.12  
402,0.11741,0.11318,0.12517,0.11284,0.11719,0.12142,0.11429,0.11481,0.  
11778,0.12765,0.1199,0.13358,0.12777,0.050111,0.047505,0.047985,0.0487  
84,0.056808,0.046886,0.046719,0.047179,0.048064,0.048467,0.049781,0.05  
1801,0.048055,0.046761,0.048209,0.048235,0.048482,0.13242,0.12015,0.12  
333,0.12349,0.11219,0.11782,0.11443,0.11696,0.11363,0.12141,0.12894,0.  
12616,0.12552,0.12169,0.10629,0.12608,0.046835,0.051884,0.054461,0.052  
153,0.048699,0.041276,0.049924,0.049664,0.0544,0.047792,0.046328,0.044  
297,0.052158,0.046344,0.054655,0.042713,0.04843,0.048177,0.052744,0.13  
331,0.11402,0.12611,0.11639,0.10809,0.13593,0.12156,0.12482,0.12494,0.  
11941,0.12811,0.12169,0.12445,0.046971,0.047272,0.049012,0.049931,0.04  
0628,0.046402,0.048291,0.048548,0.054856,0.044545,0.050379,0.042511,0.  
047994,0.043936,0.047768,0.048875,0.050395,0.042871,0.050045,0.054746,  
0.050346,0.12045,0.12684,0.12027,0.10964,0.14431,0.11974,0.1249,0.1183  
3,0.12146,0.045479,0.050095,0.050029,0.037352,0.047586,0.049271,0.0481  
78,0.055972,0.040844,0.047463,0.048255,0.053005,0.046459,0.060667,0.04  
963,0.052109,0.050538,0.04896,0.054961,0.045096,0.047626,0.058047,0.04  
7848,0.047134,0.054381,0.12066,0.11099,0.12326,0.12463,0.046478,0.0527  
1,0.056738,0.04601,0.049393,0.050144,0.044035,0.04099,0.044272,0.05066  
2,0.053767,0.0445,0.046121,0.048767,0.049227,0.053503,0.046002,0.04428  
7,0.042584,0.050484,0.044517,0.047174,0.052253,0.044846,0.049567,0.048  
173,0.044686,0.042257,0.051639,0.051656,0.045644,0.04448,0.055849,0.04  
4571,0.050895,0.048674,0.048581,0.046623,0.045814,0.047792,0.046795,0.  
042301,0.055781,0.048034,0.050918,0.044758,0.047733,0.051505,0.049305,  
0.043045,0.04855,0.047849,0.056405,0.049937,0.049359,0.053904,0.047261  
,0.055588,0.050335,0.046093,0.048389,0.051076,0.044538,0.05195,0.04819  
2,0.052518,0.048743,0.047105,0.045344,0.050331,0.043539,0.049942,0.049  
016,0.049945,0.04517,0.048982,0.054206,0.051378,0.054437,0.045427,0.05  
6258,0.050654,0.046456,0.0537,0.049006,0.05224,0.047608,0.046229,0.053  
853,0.046935,0.048354,0.050435,0.045008,0.04136,0.051251,0.051232,0.05  
1001,0.052697,0.045764,0.046592,0.05183,0.040954,0.043178,0.052529,0.0  
467,0.050664,0.04553,0.050255,0.053022,0.050454,0.047954,0.052732,0.04  
7793,0.048179,0.047981,0.046976,0.04885,0.044751,0.047495,0.047545,0.0  
43759,0.055368,0.04546,0.046844,0.052523,0.047926,0.04393,0.060348,0.0  
43528,0.048551,0.049802,0.048968,0.048468,0.048103,0.047102,0.048157,0  
.050687,0.044971,0.042604,0.051652,0.041568,0.048266,0.04483,0.054424,  
0.050336,0.048769,0.049055,0.051307,0.051634,0.05178,0.052617,0.048262  
,0.043257,0.045246,0.048728,0.050976,0.048977,0.051239,0.050943,0.0553  
27,0.047423,0.048185,0.047664,0.048462,0.046027,0.050756,0.039512,0.04  
7469,0.04997,0.051268,0.049509,0.04789,0.046461,0.045071,0.052262,0.04  
6974,0.045013,0.049772,0.043761,0.037419,0.050937,0.050906,0.046616,0.

052701,0.05072,0.049538,0.044077,0.045197,0.045694,0.050015,0.044789,0.050593,0.048858,0.048832,0.049548  
0.19715,0.19949,0.2031,0.19572,0.19138,0.1958,0.20807,0.19571,0.19036,0.19948,0.20771,0.19787,0.19263,0.20424,0.2023,0.2006,0.19779,0.19365,0.20418,0.19659,0.27239,0.28939,0.34229,0.29619,0.20251,0.1888,0.21128,0.20216,0.20369,0.19809,0.20254,0.20342,0.19753,0.19851,0.20094,0.20252,0.19786,0.20234,0.19579,0.41399,0.28763,0.26321,0.37437,0.2184,0.29351,0.32824,0.1943,0.1996,0.19464,0.20656,0.1922,0.19121,0.19497,0.19136,0.19262,0.18988,0.19977,0.19709,0.19387,0.19336,0.20334,0.33544,0.36291,0.31005,0.31786,0.32687,0.31513,0.31939,0.32165,0.29012,0.3089,0.20111,0.19895,0.1984,0.197,0.19336,0.20052,0.18523,0.20059,0.19244,0.19993,0.18672,0.1934,0.1934,0.1949,0.20046,0.41428,0.42398,0.35311,0.27978,0.23092,0.29782,0.25556,0.30123,0.30384,0.2366,0.28645,0.25909,0.19647,0.20478,0.20169,0.19321,0.20486,0.20261,0.19298,0.20098,0.19786,0.20208,0.19562,0.20344,0.19906,0.18846,0.20033,0.19612,0.3894,0.34552,0.4275,0.36768,0.29805,0.30636,0.31196,0.28155,0.28122,0.25781,0.32061,0.28841,0.31856,0.26922,0.20377,0.19316,0.20083,0.20073,0.19733,0.18935,0.20364,0.19743,0.20199,0.20231,0.20272,0.19622,0.20217,0.2007,0.19037,0.20321,0.38349,0.42389,0.45149,0.45602,0.36187,0.52113,0.37323,0.26333,0.29826,0.28117,0.36274,0.30659,0.29043,0.29987,0.28084,0.27052,0.1957,0.19225,0.20519,0.19845,0.19755,0.21147,0.19856,0.19488,0.20135,0.19807,0.20484,0.1951,0.2032,0.20203,0.19673,0.19881,0.19555,0.42197,0.37885,0.4433,0.37475,0.37827,0.52974,0.29437,0.27863,0.23035,0.30591,0.2055,0.26681,0.25451,0.31577,0.27848,0.32955,0.27819,0.20576,0.19647,0.18773,0.19503,0.19825,0.19073,0.19224,0.19609,0.19801,0.19882,0.20354,0.20455,0.20162,0.11797,0.14284,0.12802,0.20637,0.36859,0.30289,0.33474,0.41315,0.40285,0.48238,0.40121,0.26472,0.26257,0.28157,0.28893,0.27303,0.28526,0.30532,0.33403,0.28816,0.25968,0.35789,0.20262,0.20738,0.20221,0.19147,0.19621,0.20331,0.19774,0.18678,0.20439,0.20878,0.20816,0.12169,0.11865,0.11904,0.12673,0.11645,0.1255,0.20244,0.34008,0.40946,0.4068,0.32697,0.39776,0.37318,0.36208,0.29257,0.28285,0.31836,0.35211,0.24346,0.298,0.28391,0.3173,0.22912,0.3105,0.27412,0.19724,0.20632,0.19338,0.21073,0.20505,0.19986,0.20115,0.19899,0.18439,0.12475,0.1194,0.11486,0.11948,0.12778,0.10734,0.13518,0.12304,0.12567,0.1913,0.34649,0.37707,0.43664,0.41921,0.3867,0.1706,0.36935,0.27818,0.23897,0.302,0.26741,0.33637,0.26588,0.33356,0.25253,0.3307,0.296,0.27672,0.29478,0.20107,0.19441,0.19794,0.18808,0.20237,0.19417,0.1147,0.12424,0.11816,0.12782,0.13368,0.10705,0.13609,0.12416,0.13638,0.11156,0.11687,0.12965,0.4459,0.33367,0.37359,0.40829,0.40701,0.34298,0.42864,0.29062,0.26669,0.2738,0.28873,0.30188,0.27526,0.27407,0.31146,0.30881,0.33663,0.28916,0.26757,0.19843,0.18589,0.19905,0.1196,0.12623,0.12672,0.12873,0.11942,0.11835,0.11178,0.144,0.13983,0.10305,0.1166,0.13201,0.12154,0.11656,0.14813,0.3853,0.29209,0.39333,0.42496,0.45865,0.41583,0.34449,0.35169,0.35689,0.26159,0.28292,0.23733,0.29849,0.33852,0.28886,0.31669,0.25102,0.30735,0.31283,0.29139,0.11731,0.1093,0.13414,0.10482,0.11283,0.1319,0.12707,0.11572,0.12442,0.12378,0.12429,0.12383,0.1179,0.12602,0.11879,0.1382,0.10968,0.10286,0.38268,0.37424,0.46567,0.34489,0.36021,0.37157,0.47633,0.319,0.33034,0.28997,0.30535,0.26513,0.2062,0.22996,0.18879,0.23206,0.22281,0.18514,0.19434,0.24982,0.12484,0.095054,0.12353,0.10943,0.12647,0.12273,0.12347,0.12201,0.12961,0.11856,0.12732,0.10859,0.12467,0.12166,0.12173,0.12607,0.1255,0.12462,0.41873,0.37244,0.40093,0.47279,0.42408,0.44262,0.40677,0.52677,0.38749,0.28024,0.21

93,0.23406,0.20409,0.19935,0.21544,0.20202,0.16442,0.2025,0.22866,0.23  
806,0.12294,0.11224,0.11412,0.12227,0.11056,0.1206,0.12451,0.12621,0.1  
1462,0.11529,0.11311,0.12367,0.10982,0.096012,0.11886,0.1224,0.10809,0  
.11213,0.38716,0.3644,0.36699,0.46269,0.37127,0.34172,0.41683,0.21991,  
0.21882,0.21244,0.21638,0.22053,0.23209,0.20803,0.23563,0.20193,0.2235  
,0.18187,0.19038,0.22843,0.12449,0.12118,0.12653,0.11318,0.12646,0.119  
31,0.11651,0.12108,0.11759,0.11116,0.12611,0.12449,0.11709,0.12672,0.1  
1892,0.13085,0.1296,0.12979,0.40399,0.48588,0.34153,0.41233,0.36782,0.  
35757,0.24156,0.19873,0.22222,0.2482,0.22026,0.1803,0.2129,0.21756,0.1  
8968,0.18368,0.2036,0.20447,0.22483,0.19876,0.12893,0.10553,0.11517,0.  
11942,0.12087,0.11468,0.12857,0.11901,0.11498,0.12892,0.12513,0.13951,  
0.12451,0.14033,0.12474,0.11463,0.12037,0.1269,0.43885,0.42069,0.32294  
,0.39103,0.38237,0.18356,0.204,0.23275,0.21412,0.1772,0.21681,0.21458,  
0.22936,0.20933,0.23684,0.17521,0.23395,0.20299,0.22987,0.2232,0.12482  
,0.14443,0.12397,0.12272,0.13028,0.12223,0.12782,0.10784,0.12611,0.117  
85,0.1214,0.13035,0.1132,0.13184,0.13971,0.12369,0.11805,0.10153,0.347  
91,0.49809,0.32854,0.20602,0.24841,0.18926,0.23234,0.26087,0.2401,0.12  
289,0.24593,0.21115,0.19337,0.21817,0.21125,0.19702,0.22825,0.23481,0.  
19416,0.22063,0.11684,0.10897,0.13269,0.10867,0.1268,0.10642,0.12384,0  
.12225,0.10144,0.12101,0.13964,0.12628,0.12725,0.12356,0.12136,0.11666  
,0.12273,0.11881,0.32129,0.24432,0.20473,0.20482,0.1828,0.20927,0.2282  
7,0.18324,0.1505,0.15439,0.24884,0.22001,0.18711,0.19695,0.22343,0.222  
5,0.16424,0.25178,0.21557,0.13202,0.12751,0.12886,0.11915,0.1195,0.100  
73,0.12312,0.12504,0.11577,0.11278,0.11703,0.12058,0.10549,0.11908,0.1  
2135,0.12637,0.12264,0.044927,0.28178,0.21686,0.30906,0.19461,0.21792,  
0.18431,0.21729,0.23101,0.19483,0.20822,0.19241,0.22773,0.2103,0.21097  
,0.21676,0.20412,0.23987,0.21584,0.20629,0.12442,0.12821,0.12733,0.121  
53,0.10791,0.13093,0.12424,0.11352,0.11957,0.12504,0.12531,0.1243,0.12  
313,0.12181,0.12914,0.12038,0.1221,0.044952,0.18309,0.25098,0.20497,0.  
1708,0.24269,0.20552,0.14665,0.21791,0.19169,0.23081,0.23286,0.19936,0  
.20741,0.2325,0.22519,0.19958,0.18691,0.19747,0.14862,0.12129,0.12333,  
0.13409,0.12121,0.12959,0.1255,0.12643,0.11658,0.13793,0.11779,0.11788  
,0.12566,0.12346,0.11665,0.11699,0.12217,0.13186,0.045751,0.1956,0.202  
38,0.21195,0.27626,0.20819,0.1824,0.19368,0.20028,0.23173,0.20304,0.20  
696,0.21862,0.25303,0.2025,0.21603,0.18453,0.19757,0.24746,0.11585,0.1  
1191,0.13413,0.11967,0.12875,0.11873,0.11268,0.12182,0.11666,0.12392,0  
.12377,0.1202,0.11192,0.12291,0.11487,0.13062,0.11915,0.052282,0.04861  
7,0.046119,0.17373,0.23924,0.20897,0.20012,0.24754,0.19537,0.19328,0.2  
1639,0.20332,0.18841,0.22167,0.22884,0.21258,0.19016,0.17882,0.13247,0  
.11901,0.12693,0.13075,0.12432,0.10723,0.11988,0.12375,0.12085,0.11628  
,0.12316,0.10211,0.13771,0.11445,0.09655,0.12389,0.12472,0.11384,0.043  
034,0.047673,0.044174,0.041387,0.15307,0.22844,0.16698,0.23971,0.19584  
,0.23573,0.15971,0.16523,0.19455,0.21922,0.20287,0.2297,0.11153,0.1513  
4,0.13549,0.1197,0.13261,0.1045,0.1245,0.125,0.13274,0.14134,0.12182,0  
.12226,0.10152,0.12676,0.12039,0.10673,0.11761,0.1049,0.11518,0.12058,  
0.051085,0.040864,0.043448,0.049267,0.046215,0.047512,0.23945,0.23406,  
0.14295,0.16914,0.22322,0.151,0.2346,0.20756,0.12423,0.11575,0.095999,  
0.1343,0.12187,0.11859,0.12086,0.11072,0.12418,0.14586,0.11667,0.12508  
,0.13285,0.12893,0.14391,0.11532,0.11982,0.1244,0.11314,0.12108,0.1157  
9,0.14007,0.12398,0.048422,0.040997,0.048171,0.032579,0.048973,0.04097  
,0.27354,0.22661,0.29266,0.28996,0.23826,0.046271,0.047746,0.12087,0.1  
1975,0.10676,0.1173,0.11893,0.12146,0.11019,0.12019,0.1126,0.11981,0.1

216,0.1054,0.11845,0.12094,0.13086,0.12741,0.12492,0.11577,0.1215,0.09  
7409,0.12739,0.044208,0.036548,0.057726,0.045615,0.043883,0.05039,0.04  
4869,0.050476,0.046971,0.045326,0.2182,0.23551,0.044292,0.040798,0.041  
827,0.037104,0.11078,0.12194,0.10825,0.12311,0.1017,0.1266,0.11702,0.1  
1107,0.12138,0.1129,0.11623,0.12022,0.11348,0.11425,0.11758,0.12927,0.  
12065,0.13159,0.12903,0.047796,0.043726,0.044861,0.045555,0.050585,0.0  
42395,0.044805,0.042164,0.046998,0.045644,0.046358,0.04892,0.047578,0.  
044415,0.042641,0.044925,0.046655,0.1315,0.11954,0.12479,0.12287,0.109  
48,0.11664,0.11605,0.11708,0.11192,0.12253,0.12903,0.12587,0.12419,0.1  
2245,0.10529,0.12289,0.042508,0.051084,0.052685,0.050585,0.045609,0.03  
8199,0.050473,0.043399,0.055363,0.044214,0.043533,0.042133,0.047445,0.  
043874,0.050978,0.039455,0.046962,0.046295,0.051358,0.13243,0.11304,0.  
12491,0.11772,0.10871,0.138,0.12105,0.12594,0.12367,0.11918,0.12795,0.  
123,0.12521,0.043942,0.047817,0.050092,0.045991,0.036404,0.041883,0.04  
46,0.047243,0.050829,0.043733,0.048307,0.040603,0.042042,0.040703,0.04  
1318,0.051382,0.048736,0.03985,0.048019,0.051649,0.051193,0.12167,0.12  
566,0.1188,0.10773,0.14435,0.1203,0.12518,0.11727,0.11994,0.040682,0.0  
48134,0.046573,0.03403,0.047447,0.042732,0.048162,0.051351,0.03869,0.0  
44272,0.044373,0.049456,0.042406,0.056578,0.044439,0.050323,0.047895,0  
.046613,0.048513,0.04274,0.046345,0.049947,0.043334,0.045498,0.049556,  
0.11965,0.11232,0.12338,0.12319,0.040736,0.047709,0.051539,0.045399,0.  
047125,0.047658,0.04037,0.0401,0.039194,0.04896,0.051762,0.043566,0.04  
429,0.046849,0.044364,0.04993,0.044438,0.039215,0.042048,0.045958,0.03  
9773,0.043683,0.048772,0.044882,0.045722,0.044629,0.041216,0.036218,0.  
049388,0.048847,0.041429,0.041395,0.049454,0.040787,0.047848,0.045197,  
0.048834,0.042409,0.045112,0.046216,0.043587,0.038564,0.053761,0.04372  
5,0.048279,0.042552,0.042865,0.051191,0.045473,0.037913,0.045536,0.045  
281,0.05285,0.045397,0.044879,0.04896,0.044868,0.050755,0.047725,0.040  
6,0.046977,0.049003,0.043879,0.049149,0.044911,0.048825,0.043656,0.045  
05,0.043125,0.048683,0.039427,0.045277,0.046095,0.047975,0.044712,0.04  
5599,0.052172,0.049301,0.051947,0.041989,0.05201,0.049381,0.040653,0.0  
51326,0.047292,0.050666,0.046706,0.041426,0.048682,0.042262,0.042063,0  
.044126,0.039424,0.040403,0.046991,0.048511,0.049903,0.049355,0.044093  
,0.043924,0.047441,0.036983,0.042969,0.050185,0.044501,0.047942,0.0434  
78,0.04601,0.049821,0.050954,0.044202,0.049397,0.044035,0.04685,0.0458  
51,0.041862,0.047261,0.044165,0.046147,0.043073,0.04296,0.055434,0.044  
969,0.047603,0.048641,0.04416,0.039353,0.056991,0.043524,0.047109,0.04  
5511,0.046381,0.045977,0.044466,0.045706,0.043949,0.046336,0.041876,0.  
042473,0.046476,0.039438,0.044488,0.044265,0.049831,0.048722,0.04497,0  
.045,0.049146,0.049476,0.050343,0.04922,0.043174,0.039261,0.040908,0.0  
42313,0.047176,0.04368,0.048407,0.04919,0.051567,0.043084,0.044862,0.0  
45637,0.042389,0.043778,0.050713,0.03872,0.042439,0.047229,0.049149,0.  
046404,0.045865,0.042439,0.04138,0.049387,0.045988,0.040738,0.043566,0  
.038259,0.036568,0.047966,0.04851,0.043569,0.049552,0.047127,0.045503,  
0.041356,0.042384,0.044597,0.044817,0.043691,0.04911,0.048144,0.043963  
,0.044942  
0.20111,0.19762,0.20049,0.19409,0.19435,0.19576,0.2088,0.19997,0.19283  
,0.20191,0.21052,0.20071,0.19122,0.20708,0.19961,0.20493,0.20086,0.195  
72,0.20404,0.19746,0.2728,0.27591,0.31524,0.29474,0.20682,0.191,0.2106  
3,0.20489,0.2088,0.19749,0.19731,0.20543,0.19869,0.19991,0.20666,0.202  
66,0.20003,0.2053,0.19688,0.43393,0.29682,0.27893,0.35693,0.22182,0.29  
487,0.31133,0.19616,0.20209,0.194,0.20814,0.19315,0.19364,0.19811,0.19



674,0.19507,0.19755,0.20322,0.19727,0.19791,0.19361,0.20732,0.35727,0.39,0.32597,0.31724,0.33072,0.31117,0.32322,0.32554,0.30008,0.29192,0.20399,0.20063,0.19935,0.19561,0.19349,0.20232,0.18926,0.20266,0.1954,0.2011,0.1907,0.19497,0.19351,0.20404,0.20398,0.39765,0.36533,0.36674,0.29119,0.23915,0.2943,0.26886,0.29447,0.29305,0.24596,0.28743,0.25428,0.20218,0.20045,0.20551,0.19259,0.20463,0.2053,0.19298,0.20121,0.19897,0.1996,0.2003,0.20532,0.19929,0.19461,0.19595,0.19669,0.38281,0.35465,0.39845,0.37174,0.31967,0.31032,0.3015,0.28578,0.29046,0.25171,0.30294,0.28274,0.30059,0.27159,0.20717,0.19743,0.20257,0.2064,0.19584,0.18763,0.20749,0.20051,0.20157,0.2084,0.20608,0.19796,0.20268,0.19834,0.1959,0.20317,0.36478,0.42802,0.43283,0.46797,0.36235,0.49254,0.34363,0.26683,0.3018,0.27311,0.36098,0.29515,0.29301,0.27639,0.2722,0.27137,0.19222,0.19941,0.20809,0.19901,0.20248,0.20877,0.2014,0.1968,0.20251,0.20266,0.20745,0.19638,0.20564,0.20104,0.19842,0.2006,0.19923,0.38345,0.37481,0.39351,0.35315,0.3764,0.51643,0.29731,0.27588,0.22581,0.31402,0.21137,0.26667,0.25474,0.31451,0.26907,0.33796,0.25464,0.20533,0.19894,0.19353,0.19795,0.19554,0.19752,0.19615,0.19522,0.20244,0.19806,0.20154,0.20663,0.20023,0.1191,0.14447,0.12855,0.20515,0.37224,0.30083,0.35867,0.40989,0.4099,0.44878,0.41171,0.27417,0.25306,0.27416,0.28707,0.27715,0.30955,0.29341,0.33032,0.27031,0.23692,0.33994,0.20299,0.20979,0.20696,0.19518,0.19971,0.20249,0.19889,0.18657,0.20504,0.21285,0.21082,0.12201,0.11985,0.1159,0.1262,0.11903,0.12734,0.2063,0.29039,0.42058,0.36816,0.36057,0.38927,0.44521,0.34121,0.27906,0.26647,0.32301,0.36597,0.23968,0.30355,0.26982,0.29005,0.2423,0.29128,0.27305,0.19742,0.20979,0.19529,0.21074,0.20877,0.20632,0.20092,0.19984,0.18605,0.12246,0.11993,0.11293,0.11799,0.1259,0.1062,0.13644,0.12316,0.12374,0.1916,0.3601,0.3798,0.45548,0.39334,0.36312,0.19302,0.34083,0.26483,0.23033,0.31395,0.26629,0.30283,0.23912,0.31195,0.24716,0.30445,0.30889,0.28633,0.29266,0.20645,0.19397,0.20007,0.18975,0.20541,0.19766,0.11717,0.12247,0.1181,0.12666,0.13332,0.10718,0.13723,0.12193,0.13599,0.11375,0.11727,0.12903,0.45494,0.33733,0.3572,0.39238,0.38467,0.34667,0.42924,0.28298,0.24547,0.27315,0.26525,0.28698,0.27559,0.26151,0.30091,0.30425,0.34506,0.29853,0.24838,0.20179,0.19198,0.20027,0.1159,0.12332,0.12669,0.12886,0.11807,0.11654,0.1115,0.14366,0.1411,0.10318,0.11675,0.13128,0.11957,0.11753,0.14889,0.39966,0.29304,0.36808,0.43272,0.4355,0.42758,0.3347,0.34618,0.29962,0.25406,0.29025,0.23872,0.30227,0.33384,0.3059,0.29994,0.2312,0.32395,0.30711,0.27103,0.11372,0.10973,0.13442,0.10427,0.12785,0.13017,0.12582,0.1161,0.12337,0.12458,0.12248,0.1262,0.12249,0.12492,0.1198,0.13878,0.1104,0.10028,0.40242,0.39107,0.43894,0.33503,0.32213,0.34286,0.48036,0.27442,0.36627,0.29445,0.2988,0.25131,0.20635,0.21692,0.19333,0.22103,0.23153,0.18291,0.18771,0.23937,0.12346,0.09574,0.12287,0.1084,0.12556,0.12295,0.12291,0.1218,0.12953,0.11784,0.12673,0.10838,0.12291,0.12286,0.12221,0.12392,0.12553,0.12633,0.4206,0.36924,0.3993,0.42253,0.44944,0.44347,0.41003,0.48909,0.37769,0.26249,0.22866,0.21931,0.20461,0.18921,0.20674,0.20838,0.17456,0.22463,0.22236,0.23104,0.12263,0.11258,0.11419,0.12,0.11342,0.11943,0.12334,0.12359,0.11597,0.11622,0.11336,0.12268,0.10881,0.095455,0.1175,0.12223,0.10619,0.11254,0.38088,0.33089,0.3848,0.4898,0.3871,0.34663,0.38954,0.20594,0.21698,0.18909,0.21156,0.22073,0.21571,0.19936,0.23583,0.19812,0.22145,0.17409,0.19602,0.22862,0.1268,0.12445,0.12639,0.11158,0.12573,0.12248,0.11304,0.12135,0.1182,0.10954,0.12609,0.12439,0.11811,0.12561,0.11843,0.12861,0.1278,0.13148,0.35416,0.47865,0.36672,0.39661,0.37243,0.333

2,0.21953,0.19252,0.22693,0.23865,0.24097,0.17626,0.20614,0.22191,0.18  
621,0.17509,0.20022,0.21214,0.22116,0.19425,0.13042,0.104,0.11401,0.11  
961,0.12222,0.11552,0.13234,0.11859,0.11375,0.13055,0.12543,0.13984,0.  
1232,0.14121,0.1236,0.11437,0.11962,0.12564,0.45662,0.40238,0.31732,0.  
39496,0.34633,0.17826,0.2112,0.24054,0.21567,0.175,0.20066,0.20469,0.2  
2664,0.19501,0.24155,0.17526,0.23442,0.19886,0.21017,0.21718,0.12334,0  
.14418,0.1215,0.12282,0.12991,0.12075,0.12776,0.1099,0.12575,0.11653,0  
.12273,0.13153,0.11328,0.12978,0.13757,0.12205,0.11894,0.10169,0.34124  
,0.51181,0.32449,0.20191,0.25765,0.17945,0.24734,0.26225,0.22496,0.117  
,0.24631,0.21064,0.18511,0.2281,0.20542,0.1992,0.22335,0.25204,0.19175  
,0.20521,0.11661,0.10774,0.13475,0.10736,0.12812,0.10569,0.12173,0.120  
42,0.10166,0.12262,0.13947,0.12516,0.12737,0.12171,0.1203,0.11849,0.12  
208,0.11923,0.28205,0.22816,0.1984,0.18611,0.19038,0.21908,0.22882,0.1  
5577,0.1568,0.16741,0.24226,0.22126,0.18916,0.17952,0.215,0.23957,0.16  
113,0.23423,0.22799,0.13177,0.12714,0.12675,0.11887,0.12129,0.10268,0.  
12291,0.1262,0.11476,0.11339,0.11665,0.12162,0.10673,0.11826,0.12298,0  
.12701,0.12209,0.041892,0.25414,0.20507,0.30065,0.17304,0.21751,0.1887  
3,0.20678,0.21249,0.20084,0.22898,0.19655,0.22202,0.20336,0.20495,0.21  
452,0.21514,0.23503,0.20422,0.18306,0.12456,0.12718,0.12633,0.12013,0.  
10986,0.13022,0.12398,0.1129,0.11973,0.12366,0.12395,0.12531,0.12383,0  
.12258,0.1282,0.12063,0.12447,0.045185,0.18498,0.24095,0.21156,0.17293  
,0.19133,0.18908,0.15718,0.21175,0.16156,0.21259,0.23618,0.1921,0.2055  
2,0.22881,0.21953,0.19782,0.18243,0.18925,0.1514,0.12293,0.12481,0.136  
06,0.12004,0.12856,0.12678,0.12768,0.11903,0.13875,0.11691,0.11849,0.1  
266,0.12153,0.11607,0.11784,0.11929,0.13257,0.046754,0.20586,0.18457,0  
.20903,0.28768,0.19583,0.16881,0.18068,0.20006,0.22314,0.20371,0.20911  
,0.21188,0.23607,0.20041,0.21793,0.17051,0.20448,0.2377,0.11471,0.1118  
,0.13464,0.11858,0.13145,0.11894,0.11231,0.12191,0.11708,0.12319,0.122  
91,0.12077,0.11243,0.12049,0.11671,0.13362,0.1168,0.049727,0.045997,0.  
043936,0.16504,0.22945,0.17748,0.18989,0.24718,0.18157,0.19462,0.24527  
,0.20867,0.18818,0.20336,0.22622,0.1958,0.18764,0.17155,0.13383,0.1176  
3,0.12839,0.13037,0.12635,0.10694,0.11979,0.12436,0.11949,0.11536,0.12  
249,0.10338,0.137,0.11492,0.095995,0.12434,0.12344,0.11391,0.0439,0.04  
6159,0.041508,0.039485,0.15141,0.20644,0.18024,0.25088,0.1853,0.21997,  
0.15038,0.18426,0.18391,0.21629,0.18616,0.23505,0.11403,0.14993,0.1348  
9,0.12049,0.13151,0.10537,0.12401,0.12532,0.13219,0.14123,0.11932,0.12  
295,0.10077,0.12667,0.12118,0.10899,0.11616,0.10428,0.1174,0.12093,0.0  
48518,0.037794,0.043395,0.046289,0.043265,0.047965,0.23116,0.21768,0.1  
6108,0.15572,0.2226,0.17386,0.23875,0.20875,0.12451,0.11516,0.096924,0  
.13472,0.12362,0.11636,0.12012,0.11243,0.12455,0.14548,0.11803,0.12416  
,0.13372,0.13022,0.14431,0.11711,0.11848,0.12459,0.11359,0.12231,0.116  
88,0.13872,0.12193,0.045536,0.040226,0.049233,0.0331,0.046123,0.039356  
,0.24839,0.20534,0.30417,0.28094,0.24094,0.043381,0.043764,0.11927,0.1  
1937,0.10505,0.11723,0.11884,0.12023,0.1109,0.12206,0.11101,0.12098,0.  
12474,0.10692,0.11797,0.11988,0.13218,0.12879,0.12382,0.11664,0.12266,  
0.095643,0.1263,0.04301,0.036526,0.05482,0.043424,0.042703,0.046885,0.  
040939,0.048249,0.044519,0.044374,0.21366,0.21081,0.045149,0.040449,0.  
042951,0.035966,0.10958,0.12263,0.10825,0.12207,0.099255,0.12792,0.116  
48,0.11294,0.12145,0.11044,0.11667,0.11776,0.11145,0.1122,0.11621,0.12  
949,0.12054,0.13213,0.12891,0.046193,0.042628,0.042644,0.043485,0.0456  
56,0.038395,0.038427,0.038182,0.048385,0.045519,0.041758,0.045263,0.04  
4337,0.040956,0.043339,0.04372,0.047932,0.13246,0.11836,0.12277,0.1233

6, 0.11003, 0.11745, 0.11739, 0.11932, 0.11171, 0.12218, 0.12789, 0.12799, 0.12  
289, 0.12497, 0.10377, 0.1227, 0.040549, 0.049447, 0.049282, 0.045535, 0.04363  
7, 0.03879, 0.048397, 0.042198, 0.052448, 0.040335, 0.043461, 0.041628, 0.0487  
22, 0.041959, 0.048712, 0.038196, 0.044777, 0.041703, 0.047688, 0.13279, 0.112  
74, 0.12666, 0.11766, 0.10774, 0.13707, 0.12001, 0.12627, 0.1223, 0.11957, 0.12  
706, 0.12297, 0.12479, 0.042442, 0.045785, 0.045665, 0.041574, 0.036328, 0.040  
529, 0.044598, 0.046641, 0.047994, 0.040638, 0.045412, 0.039031, 0.041129, 0.0  
41775, 0.038484, 0.047547, 0.047632, 0.035671, 0.043524, 0.047292, 0.046587, 0  
.12506, 0.12682, 0.11944, 0.10742, 0.14404, 0.11999, 0.12796, 0.11944, 0.12077  
, 0.039867, 0.044348, 0.044603, 0.030993, 0.046728, 0.041002, 0.048047, 0.0481  
9, 0.036306, 0.041566, 0.039846, 0.047658, 0.038771, 0.053384, 0.044988, 0.046  
377, 0.046573, 0.044563, 0.045011, 0.04156, 0.045717, 0.050339, 0.043117, 0.04  
4186, 0.047049, 0.12086, 0.11246, 0.12607, 0.12302, 0.040339, 0.047475, 0.0506  
41, 0.042294, 0.041386, 0.04198, 0.038561, 0.038981, 0.039307, 0.048809, 0.048  
576, 0.04514, 0.042441, 0.043312, 0.042769, 0.045362, 0.043098, 0.037742, 0.04  
, 0.043591, 0.037107, 0.0428, 0.048313, 0.046661, 0.042556, 0.04251, 0.04099, 0  
.035177, 0.0483, 0.045309, 0.039148, 0.039133, 0.047626, 0.038128, 0.044086, 0  
.046192, 0.045209, 0.040539, 0.044491, 0.042041, 0.041333, 0.036459, 0.052653  
, 0.040514, 0.045372, 0.039079, 0.042093, 0.049903, 0.04253, 0.035775, 0.04686  
7, 0.047174, 0.051435, 0.043783, 0.042064, 0.047786, 0.04547, 0.046546, 0.0483  
02, 0.041441, 0.04638, 0.044868, 0.040402, 0.047731, 0.041943, 0.04808, 0.0417  
2, 0.037507, 0.042925, 0.048378, 0.037875, 0.043369, 0.041238, 0.046408, 0.043  
792, 0.043724, 0.049031, 0.04502, 0.05104, 0.03954, 0.048299, 0.046412, 0.0383  
56, 0.048489, 0.045526, 0.050069, 0.046125, 0.04236, 0.048848, 0.041811, 0.042  
664, 0.040705, 0.040191, 0.040206, 0.040599, 0.049297, 0.047282, 0.046701, 0.0  
43559, 0.042836, 0.047516, 0.034067, 0.041933, 0.045576, 0.043759, 0.046123, 0  
.04166, 0.046929, 0.045466, 0.049915, 0.04125, 0.048685, 0.04213, 0.042875, 0.  
043748, 0.043679, 0.045663, 0.040666, 0.04291, 0.038667, 0.041206, 0.053387, 0  
.04179, 0.044414, 0.044452, 0.040909, 0.037076, 0.054389, 0.042365, 0.047434,  
0.042029, 0.043365, 0.043058, 0.041939, 0.044781, 0.041288, 0.045928, 0.03921  
6, 0.040372, 0.042086, 0.037164, 0.041619, 0.044541, 0.044392, 0.045248, 0.042  
593, 0.044849, 0.047844, 0.047139, 0.04748, 0.046507, 0.041026, 0.038586, 0.03  
8896, 0.039585, 0.045078, 0.04137, 0.045884, 0.04434, 0.047114, 0.038543, 0.04  
3518, 0.042825, 0.043898, 0.04331, 0.047972, 0.0387, 0.041735, 0.045479, 0.043  
487, 0.044487, 0.04202, 0.043455, 0.040632, 0.047064, 0.042716, 0.040872, 0.04  
2561, 0.038453, 0.035514, 0.043144, 0.047012, 0.041163, 0.045085, 0.044062, 0.  
044601, 0.039577, 0.041505, 0.040399, 0.043656, 0.038936, 0.048255, 0.045988,  
0.042587, 0.044038  
0.20351, 0.20022, 0.20102, 0.19659, 0.19733, 0.19725, 0.21221, 0.20238, 0.1924  
9, 0.20231, 0.21101, 0.20907, 0.19421, 0.20948, 0.20178, 0.2065, 0.20161, 0.196  
27, 0.20374, 0.1997, 0.27401, 0.28192, 0.29532, 0.27479, 0.20539, 0.19091, 0.21  
365, 0.20607, 0.21327, 0.19881, 0.19642, 0.20451, 0.19927, 0.20262, 0.21114, 0.  
20828, 0.19896, 0.20528, 0.19774, 0.40762, 0.2941, 0.30096, 0.34601, 0.25407, 0  
.29394, 0.28936, 0.19881, 0.20334, 0.19286, 0.20832, 0.19566, 0.19376, 0.20119  
, 0.19632, 0.19763, 0.19638, 0.20634, 0.20365, 0.19716, 0.192, 0.20964, 0.35301  
, 0.36724, 0.30597, 0.31584, 0.3148, 0.30689, 0.30228, 0.29531, 0.30141, 0.3082  
8, 0.21015, 0.20118, 0.1953, 0.20385, 0.1937, 0.20304, 0.18937, 0.20395, 0.1962  
6, 0.19963, 0.19283, 0.1983, 0.19367, 0.20253, 0.20499, 0.43151, 0.40106, 0.344  
55, 0.29681, 0.24229, 0.27689, 0.27619, 0.32373, 0.30103, 0.25166, 0.27722, 0.2  
7054, 0.20335, 0.20244, 0.20708, 0.19296, 0.20585, 0.20678, 0.19557, 0.20335, 0  
.20126, 0.20336, 0.2046, 0.20584, 0.20028, 0.19806, 0.19299, 0.20208, 0.3852, 0  
.35641, 0.44688, 0.35553, 0.31122, 0.33233, 0.28566, 0.30154, 0.27523, 0.26038

,0.29659,0.28893,0.29401,0.25974,0.20768,0.19418,0.20301,0.20895,0.19835,0.18911,0.2066,0.20293,0.20819,0.2034,0.20418,0.20092,0.20883,0.20189,0.19453,0.20248,0.37518,0.47207,0.46428,0.45534,0.3061,0.48319,0.34052,0.27169,0.29016,0.29712,0.32849,0.28223,0.29444,0.26828,0.24312,0.27081,0.20015,0.19703,0.20595,0.20134,0.20534,0.20754,0.19869,0.19861,0.20825,0.20526,0.20888,0.19693,0.20834,0.2005,0.19946,0.20232,0.19771,0.35771,0.36731,0.39492,0.35255,0.41655,0.49523,0.29047,0.27372,0.21737,0.31771,0.21705,0.26849,0.26114,0.31224,0.28511,0.3272,0.25929,0.20832,0.20453,0.19591,0.19626,0.1967,0.19859,0.19905,0.19249,0.20487,0.20005,0.20108,0.20719,0.20201,0.11991,0.14519,0.12915,0.20668,0.36232,0.28433,0.34814,0.39446,0.45557,0.43365,0.3803,0.27909,0.27181,0.26369,0.27719,0.27838,0.32841,0.29751,0.31306,0.26982,0.24393,0.33554,0.20593,0.2093,0.20785,0.19924,0.20338,0.20364,0.20058,0.19013,0.21097,0.21157,0.20982,0.12155,0.1206,0.11626,0.12624,0.11951,0.12654,0.20776,0.31981,0.37577,0.35345,0.33966,0.40088,0.44303,0.38934,0.27486,0.24644,0.29681,0.36924,0.24049,0.28578,0.27661,0.29237,0.23507,0.29652,0.26356,0.19849,0.20852,0.19279,0.2077,0.21029,0.20251,0.19708,0.20273,0.18864,0.12167,0.12014,0.11082,0.11759,0.12692,0.10636,0.13482,0.12279,0.1227,0.19753,0.33471,0.42323,0.42005,0.35361,0.34154,0.18799,0.35536,0.26721,0.2481,0.31502,0.26727,0.31916,0.25083,0.31887,0.25228,0.29133,0.29682,0.27625,0.29886,0.20261,0.19556,0.20317,0.1896,0.207,0.19952,0.11677,0.12399,0.11823,0.12617,0.13287,0.10874,0.13806,0.12245,0.13627,0.11618,0.11843,0.12811,0.405,0.36835,0.36254,0.43403,0.40029,0.36214,0.41107,0.29348,0.23489,0.25658,0.25958,0.26763,0.28336,0.26531,0.30288,0.27801,0.35857,0.30873,0.25341,0.20117,0.19125,0.20125,0.11681,0.12145,0.12521,0.12634,0.11786,0.11695,0.11184,0.14299,0.14141,0.10192,0.11904,0.1326,0.11844,0.12072,0.14859,0.42765,0.29648,0.312,0.41225,0.40414,0.45919,0.31411,0.36087,0.31104,0.25129,0.28303,0.243,0.30886,0.33303,0.31084,0.29473,0.24078,0.33079,0.29993,0.27643,0.11387,0.10749,0.13473,0.10606,0.12709,0.13152,0.12591,0.11942,0.12418,0.12341,0.12141,0.12453,0.1224,0.1233,0.12058,0.13696,0.10994,0.09981,0.37298,0.37346,0.38645,0.27976,0.2995,0.37441,0.45439,0.25546,0.32692,0.3054,0.28521,0.22366,0.20135,0.22872,0.19715,0.22522,0.2343,0.17409,0.18218,0.22995,0.12344,0.09702,0.12292,0.10978,0.12554,0.12287,0.12081,0.12267,0.13115,0.11759,0.12767,0.10735,0.12361,0.12226,0.12344,0.12527,0.12546,0.1262,0.43272,0.37095,0.39942,0.38157,0.44561,0.44211,0.40714,0.47379,0.35584,0.25985,0.22155,0.20226,0.20598,0.19096,0.21552,0.19937,0.17151,0.22211,0.22318,0.24973,0.12292,0.11343,0.11471,0.11843,0.11285,0.11812,0.12588,0.12482,0.11641,0.11558,0.11377,0.12115,0.10829,0.096131,0.11762,0.12087,0.10693,0.11098,0.35661,0.30189,0.37502,0.51345,0.36515,0.3294,0.38783,0.19354,0.23161,0.19749,0.21723,0.22772,0.22287,0.21574,0.22739,0.2027,0.21907,0.17201,0.18869,0.22293,0.12572,0.1223,0.1276,0.1112,0.12786,0.12144,0.11384,0.12112,0.11742,0.1107,0.12815,0.12492,0.1205,0.12342,0.11911,0.12915,0.12705,0.12863,0.33732,0.42028,0.35774,0.39789,0.34337,0.30682,0.21046,0.17994,0.21652,0.24628,0.22474,0.16781,0.20397,0.22371,0.17857,0.17849,0.2032,0.19892,0.20695,0.19146,0.13258,0.10403,0.11291,0.11928,0.12072,0.11762,0.13059,0.11767,0.11446,0.13043,0.12459,0.1408,0.1225,0.14168,0.12421,0.11356,0.11875,0.12641,0.43662,0.38384,0.32169,0.43548,0.36979,0.16578,0.18683,0.25609,0.22665,0.19335,0.2148,0.20187,0.23099,0.1943,0.23731,0.18181,0.22599,0.19507,0.21963,0.22962,0.12521,0.14273,0.11992,0.12291,0.1275,0.12045,0.12904,0.10919,0.12511,0.11883,0.12222,0.13276,0.11518,0.1319,0.13793,0.12144,

0.11975,0.10274,0.33289,0.46789,0.31106,0.18979,0.268,0.17611,0.24423,  
0.25427,0.22899,0.1188,0.24427,0.19934,0.19161,0.21849,0.19628,0.19356  
,0.23387,0.24465,0.2061,0.2129,0.11742,0.10642,0.13611,0.10765,0.12826  
,0.10546,0.12342,0.12042,0.10046,0.12351,0.13835,0.12425,0.12785,0.121  
72,0.12161,0.11704,0.1217,0.11967,0.29782,0.2184,0.1935,0.18885,0.1889  
9,0.19692,0.22821,0.15226,0.15318,0.18506,0.24242,0.22898,0.19077,0.18  
57,0.20249,0.23349,0.17149,0.22526,0.24585,0.12953,0.12671,0.12661,0.1  
1971,0.12139,0.10112,0.12598,0.12729,0.11631,0.11233,0.11716,0.12083,0  
.10803,0.1185,0.12184,0.12586,0.12283,0.037586,0.25908,0.19347,0.28635  
,0.18583,0.17639,0.18718,0.20029,0.20869,0.19991,0.22177,0.18865,0.218  
08,0.20619,0.19857,0.20071,0.20865,0.21958,0.19848,0.18714,0.12585,0.1  
2598,0.1271,0.12108,0.10927,0.12808,0.1243,0.11105,0.12048,0.12186,0.1  
2481,0.1253,0.12327,0.12253,0.12991,0.11989,0.12383,0.048171,0.19342,0  
.21672,0.2219,0.17639,0.20652,0.21096,0.19017,0.21935,0.17369,0.1901,0  
.23566,0.20276,0.22885,0.22127,0.21862,0.20804,0.19601,0.18749,0.15075  
,0.12371,0.12271,0.13393,0.11998,0.12641,0.12567,0.12695,0.11796,0.138  
18,0.11458,0.11777,0.12642,0.12158,0.11824,0.11615,0.11986,0.13143,0.0  
43056,0.20345,0.1684,0.19722,0.2693,0.2065,0.16926,0.18457,0.16905,0.2  
142,0.17563,0.21491,0.22228,0.22146,0.18913,0.22344,0.1773,0.20842,0.2  
4199,0.11521,0.11139,0.13404,0.11792,0.13028,0.12048,0.11316,0.1216,0.  
11764,0.12346,0.12226,0.12132,0.11155,0.12099,0.11595,0.13355,0.11815,  
0.043585,0.044682,0.042137,0.17392,0.223,0.17646,0.18899,0.23906,0.173  
8,0.1879,0.24264,0.19323,0.19606,0.19581,0.2128,0.2021,0.17826,0.18481  
,0.13798,0.11907,0.12728,0.12849,0.12848,0.10654,0.12088,0.12306,0.117  
38,0.11776,0.12349,0.10453,0.13721,0.11389,0.095909,0.12292,0.12213,0.  
11429,0.041783,0.045147,0.039736,0.036549,0.14262,0.21782,0.15998,0.24  
502,0.173,0.21371,0.14125,0.18132,0.18637,0.21871,0.18999,0.23803,0.11  
626,0.14761,0.13355,0.11882,0.13035,0.10663,0.12346,0.12649,0.13074,0.  
14148,0.12044,0.12209,0.102,0.12172,0.12352,0.11131,0.11532,0.1051,0.1  
1768,0.12162,0.047937,0.037594,0.042712,0.044885,0.0436,0.048166,0.213  
78,0.20815,0.17789,0.15654,0.19306,0.18034,0.2273,0.21705,0.12598,0.11  
52,0.098749,0.13403,0.12235,0.11789,0.12011,0.11093,0.12474,0.14607,0.  
1175,0.12329,0.13379,0.12933,0.14317,0.11689,0.11613,0.1217,0.11308,0.  
12399,0.11808,0.1403,0.1232,0.045498,0.044239,0.048715,0.034298,0.0438  
07,0.03592,0.23754,0.18301,0.2973,0.27804,0.22248,0.040542,0.046426,0.  
11989,0.11755,0.10377,0.11826,0.12079,0.12076,0.11163,0.12248,0.10981,  
0.11949,0.12541,0.10458,0.11926,0.11724,0.13327,0.13056,0.12488,0.1153  
7,0.12013,0.095542,0.12657,0.042533,0.033189,0.051361,0.038853,0.04018  
1,0.043832,0.040375,0.048991,0.044701,0.045191,0.21196,0.22498,0.04384  
7,0.038492,0.042114,0.034456,0.10943,0.12075,0.10744,0.11974,0.10015,0  
.12522,0.11543,0.11187,0.12175,0.11182,0.11696,0.11798,0.11228,0.11281  
,0.11668,0.12791,0.12109,0.13365,0.127,0.042781,0.041874,0.03906,0.043  
793,0.044112,0.038839,0.037597,0.036263,0.048556,0.043035,0.040505,0.0  
44301,0.042734,0.038832,0.040905,0.043158,0.043163,0.1315,0.11718,0.12  
255,0.12421,0.11175,0.11525,0.11532,0.12198,0.11119,0.12323,0.12824,0.  
12588,0.1224,0.12293,0.10677,0.12027,0.037481,0.046914,0.048605,0.0439  
36,0.039519,0.037577,0.045297,0.043295,0.052285,0.040744,0.042434,0.04  
0203,0.04774,0.042187,0.044654,0.038261,0.046352,0.04038,0.042859,0.13  
341,0.11257,0.12439,0.11663,0.10689,0.13549,0.12018,0.12521,0.12435,0.  
12023,0.12621,0.12364,0.1252,0.043111,0.046216,0.043814,0.040272,0.035  
294,0.040012,0.044763,0.045904,0.047065,0.038398,0.047643,0.039509,0.0  
38736,0.036719,0.03688,0.046258,0.043423,0.031002,0.038515,0.046699,0.

045267,0.12438,0.1276,0.12051,0.10576,0.1451,0.12106,0.1285,0.11891,0.  
1231,0.039984,0.043788,0.050315,0.031428,0.046337,0.040661,0.049329,0.  
048347,0.039765,0.043094,0.039207,0.046537,0.034433,0.049638,0.045574,  
0.04316,0.046414,0.041705,0.042858,0.038815,0.044298,0.04889,0.040519,  
0.044088,0.04476,0.12139,0.11454,0.12399,0.1241,0.041257,0.04826,0.047  
709,0.040525,0.041708,0.040625,0.037223,0.038717,0.036412,0.04662,0.04  
5632,0.040744,0.040983,0.043337,0.043659,0.046164,0.042629,0.0367,0.03  
8502,0.039609,0.038188,0.04065,0.043027,0.048565,0.041159,0.038751,0.0  
39751,0.03704,0.04544,0.045741,0.039304,0.037229,0.045192,0.0345,0.041  
816,0.046958,0.041821,0.041131,0.045014,0.039644,0.039442,0.035144,0.0  
51672,0.038197,0.043835,0.036667,0.042206,0.048599,0.042145,0.034629,0  
.042705,0.046876,0.049621,0.040971,0.044669,0.044252,0.042029,0.043768  
,0.047757,0.040988,0.046251,0.04127,0.041237,0.044638,0.043704,0.04309  
3,0.040614,0.037653,0.043634,0.044558,0.039552,0.042926,0.039385,0.044  
149,0.038936,0.042049,0.045985,0.043754,0.050248,0.036747,0.045954,0.0  
44027,0.039003,0.04899,0.044805,0.044474,0.045533,0.042171,0.043631,0.  
041146,0.042217,0.039658,0.036638,0.038908,0.035906,0.047975,0.045361,  
0.044111,0.042286,0.042846,0.046933,0.03226,0.043426,0.044582,0.043711  
,0.043654,0.038135,0.045037,0.0463,0.047764,0.039724,0.047785,0.039833  
,0.038089,0.041506,0.042665,0.043035,0.040884,0.042624,0.036904,0.0379  
5,0.051369,0.04006,0.042734,0.043286,0.038615,0.039228,0.049891,0.0407  
52,0.042808,0.044286,0.044327,0.043198,0.038423,0.044082,0.044892,0.04  
6338,0.03816,0.039675,0.042627,0.034561,0.040201,0.043164,0.043335,0.0  
44509,0.045918,0.04222,0.046013,0.044239,0.047896,0.045632,0.039782,0.  
03575,0.038993,0.039272,0.043338,0.03887,0.042402,0.041598,0.044622,0.  
038748,0.039858,0.040607,0.040745,0.039623,0.047625,0.036273,0.041182,  
0.042939,0.044853,0.043057,0.039072,0.04387,0.041817,0.04994,0.040592,  
0.042029,0.042504,0.03677,0.034823,0.039434,0.044457,0.036691,0.043105  
,0.04224,0.045199,0.038582,0.038787,0.038198,0.045286,0.036747,0.04522  
5,0.039845,0.042599,0.043182  
0.20439,0.20187,0.1999,0.19977,0.20321,0.19478,0.21358,0.20313,0.19964  
,0.20216,0.2102,0.21163,0.19622,0.21037,0.204,0.20617,0.20761,0.19696,  
0.2033,0.20259,0.28906,0.28391,0.31048,0.27435,0.20663,0.19235,0.21194  
,0.20539,0.2134,0.20017,0.19873,0.20718,0.20299,0.20597,0.20981,0.2079  
4,0.19664,0.20645,0.19774,0.39242,0.26228,0.31485,0.32777,0.26166,0.29  
261,0.28655,0.20384,0.2064,0.19571,0.20336,0.19968,0.19317,0.20777,0.1  
9321,0.19925,0.20103,0.2073,0.20654,0.19943,0.19505,0.20931,0.35898,0.  
37621,0.30142,0.29741,0.30078,0.30831,0.30373,0.29589,0.28855,0.30819,  
0.20979,0.20191,0.19844,0.21267,0.19426,0.20532,0.18953,0.20164,0.2026  
6,0.19938,0.19629,0.19972,0.18869,0.20195,0.20334,0.4864,0.41028,0.355  
77,0.29473,0.24751,0.26079,0.28293,0.3019,0.30213,0.24072,0.27374,0.28  
568,0.20837,0.20202,0.20786,0.19347,0.20668,0.20782,0.19912,0.20553,0.  
19991,0.20803,0.20291,0.20584,0.20339,0.20024,0.19603,0.20742,0.36723,  
0.41226,0.44693,0.34208,0.30395,0.33094,0.27765,0.30085,0.28359,0.2619  
5,0.28031,0.30154,0.28682,0.25419,0.20527,0.19855,0.20458,0.2098,0.199  
05,0.19444,0.20387,0.20257,0.21305,0.198,0.20595,0.20164,0.2094,0.2016  
3,0.19721,0.20512,0.3596,0.4769,0.44031,0.42361,0.35613,0.46173,0.3504  
3,0.28041,0.3165,0.2896,0.33772,0.28624,0.27662,0.25721,0.24578,0.2738  
,0.20091,0.19528,0.2078,0.20446,0.20229,0.20584,0.19986,0.20195,0.2081  
6,0.20585,0.21213,0.19415,0.2072,0.20301,0.19862,0.20579,0.19729,0.358  
32,0.36748,0.38109,0.36597,0.43465,0.4919,0.30814,0.27261,0.20803,0.31  
295,0.24129,0.2758,0.2689,0.31754,0.27602,0.31624,0.25286,0.20458,0.20

546,0.19782,0.20053,0.19976,0.19917,0.20172,0.1932,0.20493,0.20717,0.1  
9969,0.20403,0.20418,0.12046,0.14705,0.12645,0.204,0.39424,0.28622,0.3  
5524,0.38274,0.40972,0.43287,0.37956,0.28625,0.26666,0.27325,0.26699,0  
.27918,0.32807,0.30436,0.30412,0.27066,0.24844,0.31536,0.20511,0.20963  
,0.21193,0.2009,0.20499,0.20664,0.20066,0.18934,0.20952,0.21421,0.2079  
9,0.11953,0.12049,0.11695,0.12567,0.11927,0.1263,0.20894,0.28762,0.377  
04,0.37867,0.33461,0.38298,0.44024,0.41993,0.27663,0.24186,0.27567,0.3  
7928,0.23381,0.27756,0.2581,0.29176,0.2455,0.2839,0.26823,0.19582,0.21  
492,0.19528,0.20977,0.21419,0.20188,0.19976,0.20376,0.1912,0.12306,0.1  
2033,0.1117,0.11843,0.12664,0.10564,0.13464,0.12011,0.12272,0.19808,0.  
33024,0.42668,0.39893,0.35588,0.3432,0.16431,0.3379,0.2676,0.24965,0.3  
187,0.27389,0.32876,0.24954,0.31482,0.24446,0.28752,0.30152,0.27396,0.  
30802,0.2041,0.19969,0.20027,0.19236,0.20568,0.20461,0.11548,0.12536,0.  
.11841,0.12489,0.13252,0.10847,0.13982,0.12364,0.13459,0.11646,0.11678  
,0.12751,0.38236,0.31783,0.37372,0.47315,0.41336,0.42598,0.42059,0.278  
51,0.22449,0.26251,0.24916,0.25976,0.30133,0.25591,0.31545,0.29757,0.3  
5104,0.3003,0.26186,0.20259,0.19841,0.19693,0.11899,0.12068,0.12623,0.  
12501,0.11971,0.11612,0.11118,0.1434,0.14282,0.10201,0.11823,0.13161,0.  
.11538,0.12105,0.1464,0.41184,0.26301,0.31177,0.40832,0.43096,0.46669,  
0.33604,0.3449,0.30853,0.25195,0.291,0.24471,0.30839,0.32457,0.31314,0.  
.28071,0.24998,0.33668,0.28677,0.25751,0.11215,0.10812,0.13413,0.10526  
,0.13006,0.13153,0.12649,0.12285,0.12543,0.12282,0.12096,0.12673,0.121  
04,0.12438,0.12343,0.13714,0.10504,0.099984,0.36773,0.38016,0.3732,0.2  
7329,0.33314,0.38036,0.4956,0.23949,0.37272,0.30033,0.29776,0.2178,0.2  
0004,0.21293,0.21147,0.20909,0.24287,0.19335,0.17605,0.21747,0.12295,0.  
.095976,0.12059,0.10903,0.12596,0.12389,0.12302,0.12303,0.13243,0.1184  
8,0.12658,0.10693,0.12283,0.12309,0.12344,0.1234,0.1241,0.12687,0.4363  
3,0.38909,0.4433,0.36763,0.40408,0.43295,0.39283,0.43476,0.30005,0.255  
06,0.2177,0.19703,0.21275,0.17817,0.2121,0.18953,0.16977,0.22515,0.227  
76,0.26565,0.12338,0.11335,0.11483,0.1182,0.11197,0.11663,0.12749,0.12  
547,0.11412,0.1149,0.11537,0.12526,0.10658,0.097598,0.1161,0.12348,0.1  
0811,0.11004,0.3616,0.29852,0.38041,0.52159,0.40412,0.3355,0.39731,0.1  
9628,0.25035,0.19109,0.22354,0.22366,0.22908,0.22862,0.2315,0.21035,0.  
22769,0.1685,0.18945,0.2218,0.12718,0.12073,0.12935,0.109,0.12693,0.12  
069,0.11398,0.12094,0.11883,0.11097,0.12455,0.12402,0.11883,0.12397,0.  
12114,0.13084,0.12682,0.128,0.34083,0.38274,0.41878,0.39572,0.33648,0.  
34075,0.23888,0.20937,0.20563,0.26247,0.2273,0.17528,0.18558,0.22997,0.  
.19121,0.19421,0.20564,0.19288,0.21974,0.19151,0.13227,0.104,0.11589,0.  
.12023,0.12055,0.11617,0.1333,0.11832,0.11603,0.12871,0.12399,0.14227,  
0.12366,0.14418,0.12525,0.11511,0.11794,0.12715,0.40133,0.37622,0.3768  
8,0.45367,0.37395,0.17234,0.17907,0.25398,0.22489,0.19118,0.2143,0.203  
87,0.23315,0.1874,0.24691,0.17441,0.21305,0.20303,0.21507,0.22752,0.12  
559,0.14277,0.12114,0.1216,0.12707,0.12106,0.12772,0.10927,0.1242,0.11  
824,0.12238,0.13322,0.11433,0.13203,0.13664,0.12131,0.11913,0.10365,0.  
33808,0.4696,0.30791,0.17399,0.24707,0.1693,0.23974,0.23929,0.24196,0.  
11954,0.22727,0.18646,0.191,0.22433,0.1957,0.20879,0.23937,0.23797,0.1  
9814,0.2155,0.11376,0.10842,0.13754,0.10504,0.13038,0.1074,0.12154,0.1  
2058,0.099161,0.12207,0.13726,0.12439,0.12808,0.12308,0.12131,0.11607,  
0.12114,0.11934,0.28981,0.2219,0.20271,0.17185,0.19253,0.21013,0.20589  
,0.14974,0.15042,0.17186,0.23594,0.22509,0.18369,0.18617,0.20009,0.214  
83,0.18173,0.21911,0.23189,0.13211,0.12675,0.12729,0.12025,0.12224,0.0  
99264,0.12732,0.12883,0.11569,0.11405,0.11423,0.12241,0.1099,0.12114,0

.12,0.12762,0.12484,0.038433,0.26202,0.22227,0.25291,0.18023,0.16759,0.19876,0.18111,0.21308,0.1904,0.22008,0.20482,0.21718,0.1958,0.20953,0.20532,0.20401,0.21026,0.19853,0.18224,0.12746,0.12447,0.12694,0.12073,0.11123,0.12801,0.12277,0.1105,0.12041,0.12071,0.12347,0.12224,0.11988,0.12247,0.1317,0.11937,0.12434,0.045969,0.21535,0.20139,0.22498,0.17469,0.18927,0.20424,0.19177,0.20189,0.16024,0.19654,0.24694,0.20329,0.24346,0.21,0.21481,0.20597,0.20279,0.20939,0.15133,0.12418,0.12397,0.13365,0.11859,0.12663,0.12682,0.12708,0.11912,0.13742,0.11384,0.1161,0.12601,0.1234,0.11895,0.11708,0.12194,0.13044,0.043093,0.2111,0.14751,0.20069,0.28589,0.19219,0.16027,0.17961,0.17725,0.2255,0.18058,0.20114,0.22631,0.21149,0.19716,0.22682,0.18516,0.21501,0.23293,0.11707,0.112,0.13425,0.11994,0.13087,0.12047,0.11232,0.12007,0.11587,0.12041,0.12304,0.12434,0.11167,0.12218,0.11583,0.13281,0.11795,0.04244,0.04275,0.041803,0.17184,0.21043,0.1678,0.18059,0.21491,0.15644,0.17317,0.24212,0.19642,0.18831,0.193,0.22117,0.20176,0.17257,0.18361,0.13851,0.11965,0.12754,0.12876,0.13008,0.10489,0.11895,0.12222,0.11809,0.11717,0.12374,0.10564,0.13891,0.11447,0.096086,0.12356,0.12136,0.11721,0.041549,0.042266,0.038627,0.036457,0.15355,0.22549,0.17879,0.20773,0.15861,0.2111,0.12688,0.16674,0.19589,0.22877,0.17607,0.2229,0.11683,0.1474,0.13472,0.11813,0.13061,0.10741,0.12371,0.12845,0.12927,0.14301,0.11645,0.12141,0.10092,0.12352,0.121,0.1105,0.11518,0.10525,0.11669,0.12331,0.043954,0.036532,0.039952,0.040944,0.043454,0.044487,0.20794,0.20735,0.16194,0.17092,0.17778,0.14782,0.23433,0.21254,0.12501,0.11239,0.10111,0.13425,0.11969,0.12058,0.12187,0.11175,0.12508,0.14865,0.11712,0.12192,0.13517,0.12774,0.14376,0.11783,0.1176,0.12415,0.11355,0.12196,0.11615,0.14164,0.12308,0.048644,0.040774,0.047079,0.035549,0.040048,0.037285,0.24699,0.17945,0.25833,0.24373,0.20649,0.037832,0.047647,0.12068,0.11765,0.104,0.1185,0.12219,0.11923,0.11006,0.12313,0.11083,0.11734,0.12421,0.10594,0.11806,0.11718,0.13564,0.13124,0.12311,0.11474,0.11911,0.094312,0.12875,0.042162,0.031083,0.051119,0.036737,0.039666,0.041441,0.03944,0.046842,0.04453,0.044911,0.1935,0.21179,0.041646,0.035268,0.040368,0.035458,0.1094,0.12028,0.10689,0.11891,0.0995,0.12626,0.11717,0.11294,0.12124,0.11279,0.11783,0.11725,0.11117,0.1127,0.11417,0.12608,0.11983,0.13106,0.12561,0.041312,0.040656,0.040141,0.042733,0.042875,0.036077,0.036993,0.032353,0.045864,0.04402,0.040537,0.045849,0.043007,0.039028,0.040237,0.044812,0.04164,0.13187,0.11802,0.12222,0.12179,0.1107,0.11659,0.11512,0.12214,0.11094,0.12175,0.1306,0.12705,0.12128,0.12287,0.1063,0.1201,0.036858,0.042979,0.04472,0.042027,0.039624,0.040121,0.042312,0.043178,0.051225,0.040991,0.039949,0.039697,0.044487,0.040647,0.04013,0.037986,0.043524,0.040324,0.040775,0.13434,0.11048,0.12415,0.11334,0.10547,0.13298,0.11913,0.12514,0.12178,0.12111,0.12799,0.12354,0.12533,0.041856,0.045975,0.042587,0.03989,0.035911,0.040273,0.041959,0.045392,0.045696,0.038952,0.043472,0.039646,0.03869,0.039274,0.033866,0.044833,0.044653,0.032245,0.038644,0.046995,0.042689,0.12517,0.12783,0.12042,0.10468,0.14529,0.12054,0.12967,0.11881,0.12113,0.040571,0.043158,0.046327,0.03227,0.043703,0.037139,0.049665,0.048243,0.038933,0.040231,0.03663,0.044198,0.034014,0.051103,0.044837,0.041477,0.046037,0.040633,0.043452,0.040045,0.041092,0.047924,0.043747,0.041667,0.041833,0.12086,0.11528,0.12225,0.12541,0.03853,0.044559,0.043912,0.037597,0.044199,0.040276,0.036749,0.040536,0.036109,0.044275,0.04288,0.040335,0.040226,0.040159,0.041888,0.044523,0.041761,0.034918,0.038525,0.03805,0.035843,0.038479,0.045118,0.048051,0.041423,0.038615,0.040962,0.03796,



0.044684,0.043488,0.035914,0.035942,0.046028,0.037981,0.040006,0.044027,0.040372,0.039987,0.047147,0.037953,0.036144,0.035161,0.048425,0.039102,0.044418,0.039297,0.042596,0.044009,0.042493,0.03364,0.039366,0.044976,0.049293,0.038474,0.046404,0.046719,0.041365,0.040706,0.045054,0.042195,0.045777,0.042566,0.03573,0.040868,0.046496,0.042359,0.039427,0.0381,0.043638,0.042413,0.038492,0.045228,0.039343,0.044417,0.03678,0.042014,0.043715,0.044361,0.049823,0.034924,0.042527,0.045567,0.035824,0.046574,0.046275,0.044069,0.041157,0.044954,0.0448,0.040355,0.043203,0.041085,0.033574,0.037913,0.03593,0.046114,0.045002,0.042796,0.041378,0.040195,0.045849,0.034381,0.04407,0.040752,0.042168,0.041439,0.036672,0.041974,0.044433,0.048811,0.037366,0.04673,0.039455,0.039447,0.038848,0.044454,0.041777,0.041189,0.039284,0.035847,0.037532,0.045807,0.04013,0.042051,0.043664,0.038595,0.038408,0.054036,0.041126,0.041635,0.043193,0.046103,0.043334,0.035352,0.043532,0.047815,0.041971,0.039166,0.03969,0.041585,0.033842,0.041661,0.042718,0.041345,0.042305,0.04392,0.041639,0.045875,0.042512,0.045869,0.046167,0.03939,0.033107,0.039122,0.04092,0.040825,0.037187,0.041362,0.037333,0.043756,0.039517,0.040087,0.04227,0.03614,0.0387,0.049369,0.03769,0.041412,0.043913,0.04568,0.040181,0.039151,0.043682,0.04219,0.047055,0.040336,0.041217,0.041925,0.035498,0.035963,0.036737,0.041367,0.034729,0.039592,0.037726,0.043388,0.038,0.036809,0.03524,0.042932,0.037533,0.045547,0.041236,0.041886,0.04109

0.20614,0.20366,0.2031,0.20196,0.20493,0.2031,0.21439,0.20212,0.20088,0.20905,0.20895,0.20971,0.2005,0.20824,0.20412,0.20238,0.20708,0.19857,0.20921,0.20346,0.29469,0.30204,0.3326,0.26911,0.20227,0.19937,0.2121,0.2079,0.20956,0.20585,0.20042,0.20288,0.20861,0.21,0.20992,0.21437,0.19908,0.20511,0.19583,0.38042,0.26505,0.3113,0.33908,0.26438,0.29198,0.30393,0.20586,0.20838,0.1953,0.20702,0.20164,0.19286,0.20382,0.19334,0.20356,0.19737,0.21215,0.20822,0.20251,0.19654,0.20682,0.36017,0.38468,0.30071,0.2959,0.29802,0.32262,0.28883,0.30623,0.28211,0.2955,0.2112,0.20544,0.19624,0.21392,0.19619,0.20867,0.18783,0.20029,0.20418,0.20085,0.19582,0.20187,0.19655,0.20199,0.20392,0.51716,0.43597,0.37035,0.28123,0.26282,0.26161,0.27281,0.30601,0.32223,0.26163,0.28003,0.26086,0.21293,0.20604,0.20682,0.19194,0.20539,0.20846,0.19921,0.20522,0.19952,0.20986,0.20287,0.20672,0.20351,0.20079,0.1952,0.21021,0.38023,0.39558,0.44298,0.32281,0.30027,0.32865,0.28061,0.29862,0.28175,0.26994,0.29016,0.31657,0.2936,0.26965,0.20712,0.19933,0.20402,0.20902,0.20217,0.20158,0.2042,0.20641,0.21335,0.20024,0.20734,0.20223,0.20537,0.20089,0.19711,0.20564,0.39204,0.40664,0.44591,0.41602,0.3913,0.51406,0.35127,0.30087,0.31281,0.29697,0.32012,0.29347,0.27303,0.27753,0.24733,0.27538,0.20531,0.19567,0.20532,0.21062,0.20553,0.20007,0.19924,0.20263,0.20698,0.20563,0.21345,0.19543,0.209,0.20248,0.19703,0.20768,0.19679,0.38053,0.32863,0.39486,0.35426,0.43805,0.49574,0.30313,0.28535,0.21804,0.29624,0.23617,0.27038,0.23944,0.31242,0.27359,0.30683,0.25459,0.2046,0.20875,0.20351,0.20138,0.19806,0.19759,0.20179,0.19675,0.20606,0.20834,0.20131,0.20389,0.20604,0.12055,0.14321,0.12563,0.20445,0.39507,0.2686,0.37304,0.36759,0.43635,0.45197,0.39736,0.28647,0.28494,0.28971,0.25659,0.27278,0.31336,0.31406,0.2824,0.25145,0.25308,0.30358,0.20606,0.21004,0.21126,0.20147,0.20761,0.20507,0.20089,0.19047,0.20926,0.21218,0.20891,0.12118,0.12192,0.11883,0.12628,0.12136,0.12704,0.20795,0.31701,0.34593,0.36895,0.29751,0.36267,0.44619,0.41781,0.27202,0.25135,0.29163,0.38569,0.23461,0.24512,0.23907,0.30637,0.25073,0.29718,0.2595,0.19

315,0.21435,0.19804,0.21024,0.21798,0.20327,0.19956,0.20634,0.19213,0.12325,0.12037,0.11308,0.11855,0.12516,0.10814,0.13289,0.12088,0.12241,0.20128,0.31218,0.42472,0.3951,0.36794,0.37628,0.18047,0.32216,0.27176,0.28467,0.31787,0.27352,0.31875,0.22875,0.28048,0.23821,0.29044,0.30736,0.29039,0.30976,0.20653,0.20093,0.20222,0.1931,0.20476,0.20051,0.11563,0.1243,0.11883,0.12587,0.13198,0.11043,0.14024,0.12278,0.13409,0.11481,0.1195,0.12991,0.38292,0.3057,0.40157,0.43781,0.38533,0.42707,0.42292,0.30005,0.22001,0.25737,0.24897,0.24461,0.30244,0.26984,0.29815,0.30006,0.33809,0.28678,0.25141,0.2009,0.19979,0.19804,0.12096,0.12173,0.12465,0.12778,0.12042,0.11586,0.11163,0.14416,0.14432,0.10256,0.11902,0.13313,0.11593,0.1227,0.14617,0.38006,0.2346,0.32402,0.41907,0.40637,0.46623,0.33875,0.36934,0.29912,0.2551,0.26821,0.24442,0.29021,0.30802,0.29044,0.28128,0.25949,0.33385,0.27821,0.271,0.11252,0.10777,0.13745,0.10604,0.13254,0.13287,0.12668,0.12403,0.12513,0.12192,0.1199,0.1284,0.1178,0.12358,0.1236,0.13514,0.10453,0.099069,0.38274,0.37641,0.39349,0.28071,0.31864,0.34971,0.49594,0.25773,0.4055,0.30938,0.29116,0.21545,0.18818,0.20492,0.20304,0.20328,0.2291,0.19172,0.17473,0.21592,0.1215,0.0942,0.12034,0.10952,0.12664,0.12227,0.12251,0.12442,0.13043,0.11837,0.12786,0.10554,0.12304,0.12317,0.12452,0.1209,0.12137,0.12587,0.41982,0.34889,0.43554,0.40646,0.35464,0.36919,0.3854,0.45629,0.27632,0.21619,0.21462,0.19472,0.24072,0.18589,0.21303,0.19496,0.16721,0.21873,0.22052,0.24752,0.1235,0.11416,0.11655,0.11962,0.10955,0.11849,0.12637,0.12625,0.11528,0.11479,0.11651,0.12613,0.10851,0.095316,0.11728,0.12197,0.10911,0.11166,0.41749,0.26458,0.40931,0.51431,0.37769,0.35379,0.41979,0.20628,0.24052,0.18351,0.20796,0.2093,0.20658,0.22178,0.24147,0.21059,0.22854,0.17476,0.18097,0.22095,0.12643,0.12165,0.12715,0.11028,0.12673,0.12602,0.11492,0.11936,0.11946,0.11023,0.12345,0.12245,0.11741,0.12534,0.12191,0.13135,0.12807,0.12735,0.35547,0.36811,0.40177,0.3883,0.34421,0.3588,0.21874,0.22586,0.20729,0.25792,0.22848,0.16821,0.20012,0.22433,0.17771,0.1948,0.22952,0.18629,0.22061,0.19674,0.13467,0.10605,0.11616,0.11938,0.12092,0.115,0.13167,0.11998,0.11685,0.12825,0.12176,0.14197,0.12305,0.14543,0.12667,0.11542,0.11843,0.12628,0.3955,0.37335,0.37812,0.46675,0.34722,0.17399,0.16814,0.24266,0.23527,0.20065,0.24585,0.20383,0.23509,0.18753,0.25718,0.18446,0.20959,0.1998,0.21788,0.23744,0.1273,0.1416,0.12194,0.1236,0.12796,0.1203,0.12589,0.10907,0.12346,0.12089,0.12152,0.13262,0.11284,0.12947,0.13578,0.12028,0.11759,0.10242,0.32973,0.46127,0.34009,0.16754,0.21665,0.15508,0.23163,0.24258,0.26682,0.12033,0.21906,0.17183,0.19477,0.24088,0.19046,0.23293,0.22109,0.23744,0.20496,0.20001,0.10918,0.11054,0.13744,0.10469,0.13215,0.10669,0.12185,0.11952,0.098272,0.12365,0.13882,0.12647,0.12905,0.12517,0.11984,0.11621,0.12091,0.12135,0.32871,0.20894,0.19841,0.14941,0.19161,0.2259,0.21379,0.14515,0.14964,0.19593,0.23462,0.2124,0.19375,0.18717,0.20559,0.22067,0.17251,0.20055,0.22796,0.13358,0.12655,0.12588,0.11834,0.12015,0.10081,0.12593,0.13061,0.11535,0.11539,0.11523,0.12512,0.10831,0.12316,0.11785,0.12777,0.12522,0.040861,0.2583,0.21844,0.24737,0.18956,0.17271,0.16481,0.1733,0.22897,0.19342,0.22379,0.2137,0.22064,0.19025,0.21495,0.19893,0.20464,0.19011,0.21165,0.17043,0.1274,0.12316,0.12671,0.12289,0.11103,0.12996,0.12215,0.11219,0.12208,0.12029,0.12386,0.12233,0.11965,0.12294,0.13304,0.12049,0.12447,0.044236,0.21124,0.18948,0.20353,0.18967,0.21581,0.20374,0.19996,0.20433,0.15958,0.19432,0.24418,0.20442,0.2301,0.21272,0.2247,0.21878,0.2082,0.2119,0.14939,0.12389,0.12279,0.13112,0.11775,0.12762,0.12888,0.12678,0.11862,0.1

3537,0.11425,0.1172,0.12731,0.12093,0.12018,0.11873,0.12391,0.13058,0.042966,0.21426,0.16041,0.20434,0.27154,0.19384,0.15772,0.18968,0.17952,0.23799,0.1865,0.18476,0.24136,0.21084,0.18558,0.22441,0.17681,0.1988,0.2412,0.11669,0.10975,0.13164,0.12031,0.13102,0.12218,0.11201,0.12125,0.11517,0.11952,0.1225,0.12407,0.11123,0.12164,0.11686,0.13118,0.11999,0.040886,0.042993,0.040961,0.16978,0.21946,0.18131,0.17595,0.2135,0.16875,0.17062,0.23344,0.18116,0.18398,0.1963,0.21191,0.20089,0.16846,0.18014,0.1398,0.12152,0.12531,0.1276,0.12825,0.10707,0.11942,0.11957,0.11924,0.11807,0.12317,0.10363,0.13985,0.11248,0.09713,0.12244,0.1243,0.11647,0.040336,0.039042,0.036866,0.038264,0.17198,0.21104,0.17655,0.20247,0.17107,0.21217,0.10684,0.16837,0.19346,0.22231,0.19084,0.22181,0.11592,0.15034,0.13489,0.11946,0.1288,0.10578,0.12153,0.12871,0.13108,0.14622,0.1168,0.11998,0.099844,0.12698,0.12095,0.10835,0.11388,0.10507,0.11813,0.12414,0.044134,0.034792,0.039888,0.039649,0.043017,0.042457,0.1951,0.19524,0.16538,0.16202,0.19113,0.14529,0.24202,0.21933,0.12192,0.11285,0.099767,0.13321,0.12225,0.11978,0.12046,0.11183,0.12432,0.15038,0.11816,0.12261,0.13486,0.12787,0.14494,0.11671,0.11656,0.12347,0.11673,0.12067,0.12047,0.14263,0.12329,0.047865,0.038753,0.046812,0.033405,0.04152,0.035674,0.22836,0.18056,0.25605,0.25333,0.2108,0.038962,0.046925,0.11891,0.11843,0.10254,0.11913,0.12527,0.1203,0.11036,0.12255,0.11189,0.11724,0.12485,0.10648,0.11771,0.11821,0.13512,0.1324,0.1242,0.11623,0.12051,0.09675,0.12863,0.040694,0.029463,0.050054,0.034396,0.040374,0.039986,0.038531,0.046791,0.043471,0.044086,0.18672,0.21341,0.040868,0.035439,0.038232,0.03394,0.10982,0.12194,0.10934,0.12075,0.099531,0.12788,0.11888,0.11431,0.12256,0.1115,0.11892,0.11515,0.11163,0.11274,0.11391,0.13051,0.12129,0.13098,0.12652,0.038075,0.038251,0.040582,0.041076,0.039773,0.036205,0.033724,0.034407,0.042981,0.043297,0.040332,0.047136,0.041962,0.037106,0.039948,0.045805,0.042785,0.13233,0.11759,0.12018,0.12153,0.11065,0.11531,0.11438,0.1209,0.11056,0.1234,0.12846,0.1271,0.121,0.12254,0.1073,0.11955,0.036448,0.044467,0.041738,0.041662,0.040592,0.039849,0.042913,0.04481,0.049728,0.041397,0.041297,0.04057,0.044119,0.038793,0.040567,0.034608,0.037755,0.040515,0.04291,0.13298,0.10673,0.12283,0.11393,0.10448,0.13451,0.12094,0.12501,0.12185,0.12146,0.12588,0.12291,0.12469,0.036673,0.04543,0.041806,0.043159,0.034814,0.03873,0.040544,0.0455,0.046898,0.04139,0.043142,0.036524,0.038662,0.038338,0.033703,0.046791,0.044377,0.032234,0.037888,0.04567,0.04586,0.12548,0.12635,0.12097,0.10438,0.1464,0.11853,0.12746,0.11933,0.12132,0.040815,0.041509,0.04605,0.033488,0.044181,0.038203,0.049376,0.046675,0.037131,0.03951,0.035035,0.045571,0.035333,0.050176,0.044578,0.039064,0.046198,0.040574,0.042609,0.041475,0.037745,0.04589,0.042803,0.039326,0.041241,0.1188,0.11339,0.12197,0.12838,0.03677,0.042861,0.043061,0.0354,0.043946,0.040711,0.036498,0.038027,0.033855,0.042042,0.04142,0.04235,0.04226,0.040843,0.039576,0.044366,0.039967,0.033546,0.038089,0.037333,0.036915,0.0381,0.045131,0.048692,0.042469,0.037488,0.042166,0.037042,0.047256,0.041652,0.034941,0.032939,0.048,0.037353,0.041381,0.041103,0.040067,0.03925,0.047686,0.039914,0.036886,0.0376,0.044088,0.038805,0.045431,0.039179,0.042969,0.038869,0.043459,0.032598,0.038162,0.04505,0.049815,0.037902,0.045956,0.045971,0.040146,0.040153,0.04458,0.042867,0.046067,0.039732,0.037849,0.039921,0.046091,0.043159,0.037174,0.035559,0.039668,0.041108,0.038217,0.042724,0.035156,0.043035,0.039024,0.039942,0.04187,0.043929,0.051649,0.032793,0.04256,0.046052,0.035412,0.043158,0.044219,0.041844,0.040639,0.043401,0.046168,0.04

0415,0.04198,0.038603,0.032565,0.040304,0.035692,0.046215,0.045102,0.044215,0.040699,0.041712,0.044509,0.034379,0.042813,0.042708,0.043231,0.040941,0.036597,0.041085,0.042543,0.04654,0.038853,0.04553,0.036481,0.039835,0.039102,0.040425,0.041436,0.044609,0.038851,0.036856,0.038571,0.043986,0.039697,0.041397,0.042937,0.036244,0.040601,0.052083,0.041249,0.042042,0.042369,0.043714,0.043552,0.037492,0.040349,0.04441,0.041739,0.040723,0.041719,0.042041,0.032678,0.042335,0.043069,0.041118,0.040696,0.043205,0.040726,0.043903,0.042266,0.045837,0.046932,0.039012,0.034377,0.03739,0.040456,0.037964,0.036797,0.041579,0.03717,0.042285,0.040394,0.038239,0.041704,0.033189,0.039891,0.046308,0.036943,0.040132,0.043757,0.047969,0.039435,0.038981,0.043248,0.040278,0.045396,0.041297,0.040829,0.039508,0.031964,0.035047,0.037679,0.04224,0.036918,0.037472,0.035775,0.045716,0.0371,0.035829,0.033972,0.042247,0.037402,0.046652,0.040906,0.040012,0.041431

0.21001,0.20213,0.20167,0.20389,0.20179,0.20354,0.21279,0.20414,0.20188,0.20962,0.21167,0.20991,0.20245,0.20549,0.20242,0.20549,0.20574,0.19812,0.20744,0.20314,0.29615,0.29264,0.31966,0.27252,0.20584,0.20097,0.20976,0.20396,0.20851,0.20947,0.20222,0.20562,0.20587,0.21208,0.21123,0.21062,0.19983,0.20808,0.19658,0.3504,0.26229,0.30753,0.31885,0.26699,0.29675,0.297,0.2039,0.21043,0.19396,0.20752,0.20383,0.19473,0.20757,0.2004,0.20262,0.19962,0.21733,0.20818,0.20507,0.19817,0.20826,0.35364,0.38797,0.2983,0.30202,0.29935,0.31455,0.28762,0.3219,0.25788,0.28983,0.21399,0.20581,0.19453,0.21463,0.19752,0.20962,0.18871,0.20149,0.2044,0.20198,0.19761,0.20614,0.20034,0.20253,0.20643,0.46577,0.37728,0.37285,0.26624,0.26217,0.26013,0.26158,0.29082,0.31888,0.25111,0.27132,0.27954,0.21055,0.20706,0.20712,0.18884,0.20203,0.20424,0.20532,0.20882,0.2034,0.21086,0.2029,0.21008,0.2037,0.20006,0.20093,0.2105,0.38108,0.39205,0.45278,0.36608,0.29806,0.32185,0.25,0.31144,0.28305,0.27274,0.30552,0.30031,0.2937,0.27653,0.20869,0.20081,0.2034,0.20911,0.20596,0.20011,0.20858,0.20458,0.21086,0.20628,0.20699,0.20059,0.20507,0.20474,0.19608,0.20416,0.39241,0.40313,0.41586,0.45898,0.39388,0.46023,0.35592,0.29309,0.31577,0.29099,0.29009,0.29894,0.28435,0.28301,0.26126,0.27803,0.20244,0.19679,0.20547,0.21284,0.20453,0.20175,0.19955,0.20043,0.2072,0.20713,0.21676,0.19504,0.20723,0.20349,0.19663,0.20888,0.19707,0.4162,0.32943,0.40226,0.34167,0.43166,0.48037,0.31062,0.314,0.22827,0.29114,0.27343,0.27126,0.23245,0.31929,0.27314,0.32752,0.26138,0.20581,0.20984,0.2048,0.19968,0.20258,0.20194,0.20333,0.19754,0.20622,0.20822,0.19757,0.20418,0.20306,0.12037,0.14053,0.12657,0.20551,0.39434,0.26284,0.35213,0.39786,0.44146,0.38631,0.41587,0.28778,0.27894,0.28004,0.2558,0.27097,0.28688,0.29693,0.27159,0.27656,0.28003,0.30005,0.2083,0.21296,0.21864,0.20214,0.20618,0.20616,0.20245,0.19206,0.20942,0.21194,0.208,0.12082,0.1249,0.11744,0.12736,0.1207,0.1263,0.20697,0.33248,0.37247,0.39229,0.31123,0.34672,0.43255,0.44225,0.2696,0.25621,0.29156,0.36239,0.25685,0.24086,0.22145,0.28874,0.24376,0.29811,0.26749,0.19306,0.21241,0.19798,0.20991,0.21997,0.20796,0.19919,0.2078,0.19155,0.12098,0.12275,0.11395,0.11581,0.12593,0.10973,0.13494,0.12082,0.12329,0.20357,0.32059,0.40639,0.4113,0.35726,0.3965,0.22512,0.31644,0.27335,0.26853,0.32651,0.26876,0.32619,0.22293,0.27023,0.26163,0.30021,0.30651,0.29551,0.30282,0.21014,0.19801,0.2022,0.19419,0.20374,0.19802,0.11506,0.12262,0.11887,0.12763,0.13459,0.11139,0.14155,0.12283,0.13093,0.11624,0.11861,0.13109,0.34118,0.31227,0.38265,0.38922,0.35975,0.41742,0.43596,0.29807,0.22698,0.24425,0.24461,0.24944,0.3018,0.28364,0.29583,0.31182

,0.3278,0.27969,0.2535,0.19952,0.20695,0.19978,0.12341,0.12117,0.12643  
,0.12757,0.11991,0.11648,0.11091,0.14265,0.14421,0.10185,0.11874,0.132  
38,0.11297,0.12296,0.14485,0.33658,0.2428,0.33655,0.35541,0.36149,0.42  
421,0.33209,0.37729,0.30586,0.2613,0.25965,0.23761,0.27077,0.31782,0.2  
9407,0.27978,0.26304,0.3358,0.25903,0.2761,0.11455,0.10921,0.13846,0.1  
0754,0.12959,0.13358,0.12881,0.12591,0.12521,0.11997,0.11956,0.1296,0.  
11947,0.12379,0.12462,0.13724,0.10334,0.09951,0.38652,0.35082,0.37593,  
0.28782,0.30027,0.39757,0.49837,0.26131,0.38331,0.298,0.29595,0.23095,  
0.17826,0.20832,0.20955,0.19588,0.22424,0.18848,0.16727,0.21709,0.123,  
0.092127,0.12148,0.10915,0.12749,0.12387,0.12124,0.12537,0.13014,0.118  
96,0.12813,0.10683,0.12065,0.12284,0.12572,0.11891,0.1236,0.12515,0.44  
904,0.3573,0.4265,0.40902,0.32265,0.34962,0.40426,0.4373,0.28507,0.190  
54,0.22124,0.17728,0.24724,0.18498,0.2217,0.18838,0.16722,0.21271,0.21  
703,0.24781,0.12342,0.11327,0.11778,0.11942,0.11029,0.11869,0.12565,0.  
12624,0.11512,0.11544,0.11556,0.12401,0.11027,0.095092,0.11935,0.1217,  
0.10841,0.11148,0.36646,0.26888,0.37924,0.49434,0.34271,0.31992,0.4151  
6,0.2098,0.2288,0.20621,0.22195,0.2191,0.21074,0.22943,0.23549,0.19848  
,0.22983,0.17272,0.17812,0.21606,0.12596,0.12174,0.12632,0.11166,0.128  
7,0.12794,0.11483,0.11976,0.11752,0.10969,0.12549,0.1235,0.11835,0.129  
04,0.12238,0.13319,0.12754,0.1275,0.40485,0.37334,0.42642,0.41358,0.29  
872,0.37987,0.21601,0.21208,0.20656,0.23592,0.23309,0.19132,0.21671,0.  
22254,0.18345,0.20268,0.22197,0.20335,0.22293,0.19787,0.13402,0.10618,  
0.11548,0.11694,0.12209,0.11575,0.12936,0.12189,0.11693,0.12945,0.1179  
8,0.13982,0.12176,0.14377,0.12637,0.1157,0.12108,0.12703,0.39321,0.364  
3,0.37586,0.47822,0.30581,0.1828,0.17356,0.23766,0.21874,0.20123,0.246  
35,0.19771,0.22954,0.18437,0.25327,0.18272,0.21738,0.18576,0.22477,0.2  
3469,0.12607,0.14044,0.12093,0.12322,0.12657,0.11919,0.12844,0.10983,0  
.12344,0.12111,0.12113,0.13386,0.11481,0.1296,0.13619,0.11927,0.11903,  
0.10259,0.28767,0.47048,0.33284,0.15374,0.24465,0.16901,0.22687,0.2453  
5,0.29488,0.13414,0.22744,0.16717,0.20109,0.24488,0.19271,0.22,0.20763  
,0.2148,0.19123,0.20171,0.11059,0.10961,0.13685,0.1071,0.13284,0.10532  
,0.12347,0.12028,0.098218,0.12517,0.14052,0.12469,0.13083,0.12386,0.12  
019,0.11727,0.12197,0.12385,0.33134,0.20372,0.20711,0.15245,0.16911,0.  
20666,0.21457,0.14109,0.16663,0.20272,0.21557,0.22191,0.19041,0.18449,  
0.20704,0.22628,0.17193,0.21254,0.21845,0.13397,0.12617,0.12414,0.1178  
3,0.11747,0.099769,0.12587,0.1304,0.11565,0.11539,0.11426,0.12655,0.11  
011,0.12216,0.11932,0.13077,0.12443,0.03784,0.24036,0.23021,0.22835,0.  
17305,0.18287,0.16153,0.16682,0.2243,0.20033,0.22998,0.21325,0.21892,0.  
.19925,0.20774,0.19536,0.20804,0.1791,0.20055,0.16857,0.12695,0.12575,  
0.12694,0.12392,0.11094,0.13012,0.12103,0.1126,0.1231,0.11946,0.12369,  
0.12483,0.12012,0.12309,0.13257,0.11927,0.12425,0.046887,0.20093,0.202  
16,0.17824,0.18883,0.20859,0.21137,0.21251,0.19614,0.16205,0.19003,0.2  
4016,0.20044,0.21561,0.20248,0.20231,0.21873,0.19918,0.22881,0.14905,0  
.1222,0.1246,0.12987,0.11804,0.12949,0.13054,0.12621,0.1162,0.13371,0.  
11587,0.11926,0.12812,0.12106,0.12259,0.11951,0.1252,0.13162,0.044144,  
0.19793,0.16697,0.20477,0.26157,0.19342,0.14061,0.1844,0.16946,0.23576  
,0.20396,0.21232,0.2383,0.2134,0.1855,0.2217,0.18356,0.19019,0.23919,0  
.11772,0.1089,0.132,0.12274,0.13272,0.12093,0.11003,0.1212,0.11729,0.1  
2226,0.12148,0.12088,0.10995,0.12001,0.11656,0.1318,0.12033,0.03908,0.  
044355,0.041611,0.1582,0.22388,0.18209,0.17084,0.18877,0.16853,0.19105  
,0.22203,0.17881,0.18161,0.18154,0.20965,0.21242,0.1748,0.17528,0.1389  
4,0.12185,0.1268,0.12886,0.12919,0.10891,0.11853,0.11975,0.12049,0.118

33,0.12285,0.10346,0.13986,0.11275,0.097059,0.12247,0.1263,0.11897,0.0  
38528,0.04071,0.034539,0.039374,0.15431,0.17387,0.17237,0.19701,0.1511  
9,0.19629,0.095355,0.17909,0.20733,0.21211,0.19252,0.2231,0.11542,0.15  
292,0.13334,0.11978,0.12898,0.10459,0.12052,0.12882,0.12936,0.1465,0.1  
1738,0.12115,0.10017,0.12565,0.12059,0.10662,0.11269,0.1037,0.11668,0.  
12437,0.041721,0.035329,0.037478,0.040522,0.042576,0.040321,0.21037,0.  
22172,0.17277,0.1774,0.21965,0.13774,0.24042,0.21821,0.12303,0.11222,0  
.099099,0.1334,0.12268,0.11976,0.12485,0.11128,0.12466,0.14902,0.11597  
,0.1212,0.13738,0.12824,0.14706,0.11728,0.11691,0.12555,0.12025,0.1208  
6,0.12077,0.14335,0.12563,0.046124,0.038133,0.044743,0.031876,0.039114  
,0.033628,0.22199,0.17699,0.24095,0.24533,0.1925,0.038302,0.045797,0.1  
1816,0.11876,0.10199,0.1209,0.1224,0.11853,0.11077,0.12374,0.11188,0.1  
1861,0.12534,0.10515,0.12,0.11885,0.13356,0.13229,0.1256,0.11537,0.119  
93,0.095404,0.12631,0.041163,0.029333,0.04819,0.03659,0.039691,0.03464  
7,0.037934,0.041164,0.041532,0.044367,0.19294,0.19417,0.039579,0.03387  
2,0.036474,0.031725,0.11066,0.12109,0.10996,0.1231,0.10117,0.12768,0.1  
1806,0.11453,0.12109,0.10976,0.11797,0.11698,0.11355,0.11285,0.11167,0  
.1301,0.12078,0.13056,0.12659,0.035158,0.036755,0.040406,0.038163,0.03  
746,0.034843,0.035311,0.036011,0.043437,0.042758,0.036988,0.045305,0.0  
39243,0.034397,0.036614,0.045134,0.043174,0.13309,0.11972,0.12378,0.11  
947,0.11266,0.11473,0.11265,0.12258,0.11053,0.12344,0.13013,0.12654,0.  
1204,0.12318,0.10835,0.12043,0.034247,0.044935,0.038244,0.042292,0.041  
539,0.038298,0.044929,0.042816,0.050535,0.043061,0.039836,0.04217,0.04  
2369,0.038375,0.039166,0.034867,0.039248,0.039448,0.043953,0.13193,0.1  
0535,0.12295,0.11375,0.10612,0.13513,0.12085,0.12476,0.12068,0.12091,0  
.12621,0.12284,0.12428,0.033767,0.047322,0.037826,0.040781,0.036664,0.  
038544,0.038563,0.046927,0.044252,0.040738,0.042072,0.034666,0.03855,0  
.037467,0.033373,0.045127,0.043561,0.032583,0.036654,0.043561,0.044511  
,0.12677,0.12666,0.12322,0.10363,0.14808,0.11975,0.12532,0.11855,0.121  
09,0.038791,0.040619,0.046004,0.03309,0.041548,0.036807,0.048328,0.049  
151,0.036744,0.040527,0.036166,0.044508,0.03981,0.047679,0.04372,0.038  
272,0.047668,0.042527,0.037599,0.043286,0.036213,0.046821,0.044497,0.0  
38714,0.037802,0.11757,0.11443,0.12007,0.12837,0.034841,0.043203,0.041  
118,0.034853,0.04226,0.039416,0.035234,0.038631,0.036297,0.043303,0.04  
3608,0.041603,0.042301,0.036781,0.038435,0.043839,0.040335,0.035438,0.  
038383,0.036559,0.037113,0.040055,0.042699,0.047069,0.039597,0.037003,  
0.043056,0.039199,0.047213,0.040457,0.034852,0.033576,0.045755,0.03783  
9,0.041875,0.040164,0.03896,0.03882,0.046501,0.037455,0.038313,0.03452  
3,0.045471,0.041996,0.043457,0.040436,0.041315,0.039084,0.044864,0.031  
069,0.03699,0.041372,0.047061,0.037995,0.045209,0.047468,0.040834,0.04  
1175,0.040312,0.041609,0.044904,0.039095,0.037969,0.040913,0.046256,0.  
04158,0.038474,0.030774,0.039191,0.040514,0.037777,0.045155,0.033566,0  
.039883,0.042838,0.038043,0.042841,0.042853,0.050816,0.033547,0.042461  
,0.045071,0.035128,0.040711,0.045476,0.039506,0.044433,0.041359,0.0471  
52,0.041086,0.041893,0.034989,0.030772,0.040705,0.036834,0.04498,0.045  
709,0.045531,0.042913,0.042682,0.044955,0.035003,0.0425,0.042317,0.041  
648,0.037706,0.035105,0.039999,0.038908,0.045624,0.036721,0.045067,0.0  
34221,0.03904,0.03797,0.038936,0.040838,0.041887,0.035382,0.03639,0.04  
1932,0.044843,0.037268,0.040989,0.040492,0.036617,0.042311,0.049938,0.  
040305,0.03752,0.040328,0.042632,0.043913,0.038212,0.036626,0.042146,0  
.03995,0.040825,0.038844,0.041992,0.034642,0.04289,0.045313,0.041738,0  
.040459,0.042996,0.042351,0.043122,0.039752,0.047757,0.043271,0.040963

,0.03623,0.040726,0.03837,0.036046,0.035885,0.041037,0.037661,0.04113,  
0.041126,0.036391,0.041805,0.032671,0.041813,0.046517,0.036583,0.04073  
6,0.045854,0.045607,0.040707,0.03907,0.040399,0.037807,0.046389,0.0394  
43,0.041666,0.038047,0.033943,0.0355,0.037501,0.043791,0.039593,0.0386  
9,0.036856,0.043591,0.035996,0.032288,0.034148,0.040291,0.036358,0.042  
519,0.040587,0.039338,0.040231  
0.20454,0.20162,0.20085,0.20514,0.203,0.20388,0.21563,0.20654,0.20505,  
0.21061,0.20656,0.21077,0.20509,0.20214,0.20507,0.20789,0.20741,0.1995  
1,0.20974,0.20425,0.26992,0.291,0.30202,0.28874,0.21026,0.204,0.21322,  
0.20825,0.20733,0.20655,0.19857,0.20503,0.20469,0.21126,0.20664,0.2076  
3,0.20126,0.21216,0.19904,0.32966,0.25386,0.32956,0.33863,0.24404,0.28  
813,0.28344,0.20292,0.20933,0.19762,0.21317,0.20391,0.19788,0.20459,0.  
2,0.20111,0.20424,0.22012,0.2066,0.20614,0.20305,0.20835,0.31613,0.350  
85,0.29122,0.30183,0.31967,0.3161,0.30662,0.31463,0.2722,0.27947,0.214  
16,0.20542,0.19686,0.21533,0.19876,0.20628,0.19109,0.2101,0.20453,0.19  
777,0.1989,0.2094,0.19967,0.20409,0.20723,0.4864,0.36107,0.40058,0.267  
57,0.27109,0.24892,0.25614,0.2931,0.31959,0.26938,0.25375,0.30438,0.21  
129,0.20751,0.20637,0.19138,0.19816,0.20354,0.20868,0.20767,0.2044,0.2  
1416,0.19987,0.21025,0.20351,0.19948,0.20002,0.20522,0.41895,0.43055,0  
.44678,0.35694,0.30212,0.34011,0.22804,0.29218,0.28869,0.27035,0.31697  
,0.28749,0.29296,0.28069,0.20918,0.20099,0.20483,0.20669,0.20245,0.201  
74,0.20818,0.20558,0.20726,0.20519,0.20972,0.20454,0.20359,0.20542,0.1  
9707,0.20572,0.38698,0.37028,0.37619,0.41344,0.43224,0.45855,0.35113,0  
.28476,0.30277,0.28246,0.27904,0.30903,0.28343,0.30267,0.25175,0.28062  
,0.20545,0.19888,0.21041,0.21215,0.2041,0.20286,0.19686,0.20204,0.2080  
5,0.20386,0.21662,0.19338,0.21051,0.20446,0.19473,0.20505,0.19854,0.44  
03,0.30921,0.3582,0.31677,0.41536,0.39176,0.292,0.31371,0.22996,0.2973  
3,0.27347,0.27194,0.22222,0.31575,0.28182,0.32559,0.24695,0.20786,0.20  
754,0.20606,0.20323,0.20327,0.20494,0.20607,0.197,0.20703,0.21087,0.20  
003,0.20739,0.20432,0.12128,0.13903,0.12777,0.20227,0.38774,0.29484,0.  
37052,0.36306,0.40928,0.34282,0.38318,0.29011,0.27706,0.30643,0.24218,  
0.24552,0.29867,0.30238,0.28298,0.29198,0.29212,0.29948,0.20458,0.2154  
4,0.21768,0.20069,0.2056,0.20735,0.20492,0.18719,0.21364,0.21065,0.211  
27,0.12097,0.12494,0.11785,0.12706,0.1216,0.12614,0.20853,0.29991,0.40  
733,0.4063,0.36512,0.32811,0.46256,0.43329,0.25845,0.26427,0.281,0.357  
24,0.262,0.24986,0.21829,0.30825,0.2499,0.29614,0.26261,0.19745,0.2084  
4,0.19901,0.20504,0.22344,0.20809,0.19955,0.2065,0.19029,0.12184,0.121  
65,0.11345,0.11687,0.12768,0.10784,0.13165,0.12211,0.12238,0.20562,0.2  
6471,0.39601,0.37585,0.35463,0.38398,0.21399,0.31467,0.26027,0.25573,0  
.32596,0.27977,0.34331,0.22842,0.28493,0.27898,0.29212,0.30195,0.28828  
,0.29973,0.20767,0.19936,0.20358,0.19606,0.20409,0.20177,0.11767,0.122  
11,0.1174,0.12993,0.13463,0.1125,0.14025,0.12271,0.13107,0.11651,0.118  
42,0.13096,0.35344,0.34555,0.35647,0.43449,0.32097,0.42025,0.39054,0.2  
9605,0.23328,0.23935,0.24944,0.24862,0.29135,0.29336,0.27667,0.29505,0  
.34962,0.27645,0.26091,0.20155,0.21256,0.19919,0.12449,0.11875,0.12623  
,0.12833,0.12058,0.11758,0.11133,0.14251,0.14312,0.10183,0.1201,0.1344  
2,0.11739,0.1198,0.14385,0.2885,0.31124,0.30918,0.33283,0.36149,0.4307  
2,0.32912,0.41262,0.35872,0.24074,0.26336,0.23194,0.29718,0.32191,0.27  
674,0.28156,0.24758,0.35459,0.25639,0.26854,0.11443,0.10727,0.13781,0.  
10922,0.1309,0.13406,0.12702,0.12473,0.12424,0.1204,0.12042,0.13151,0.  
11792,0.12386,0.125,0.13807,0.10397,0.099605,0.35965,0.32548,0.4148,0.  
33004,0.32768,0.41161,0.45187,0.26637,0.40582,0.30566,0.29702,0.22686,

0.17409,0.20096,0.20729,0.19487,0.22918,0.17423,0.1642,0.21038,0.12385  
,0.092834,0.1235,0.11033,0.12769,0.12336,0.12101,0.12583,0.1297,0.1189  
8,0.12774,0.10936,0.12001,0.12281,0.12632,0.1183,0.12364,0.12443,0.436  
22,0.39316,0.41459,0.41695,0.33251,0.34858,0.33977,0.46193,0.29877,0.2  
0626,0.22296,0.17276,0.26661,0.17979,0.22576,0.19824,0.16903,0.19202,0  
.21579,0.23951,0.12367,0.11342,0.11858,0.12124,0.11106,0.12101,0.12675  
,0.12651,0.11558,0.11493,0.11487,0.12473,0.11026,0.094576,0.11855,0.12  
421,0.10561,0.11213,0.39213,0.28057,0.40368,0.49386,0.32717,0.33911,0.  
38452,0.20661,0.25783,0.21972,0.22204,0.23611,0.21635,0.21128,0.25316,  
0.19527,0.22191,0.17757,0.18509,0.22356,0.12598,0.12128,0.1266,0.11074  
,0.12759,0.12692,0.11499,0.12137,0.12,0.10943,0.12374,0.1228,0.11862,0  
.13149,0.12148,0.13524,0.12671,0.12638,0.35303,0.36866,0.46495,0.39312  
,0.30302,0.40288,0.22262,0.22975,0.21119,0.2269,0.236,0.1895,0.21907,0  
.22632,0.17236,0.20998,0.21161,0.19145,0.22126,0.20225,0.13554,0.10697  
,0.11685,0.11491,0.12142,0.1161,0.12699,0.12173,0.11803,0.1304,0.12042  
,0.13949,0.12058,0.14324,0.1283,0.11645,0.11975,0.1271,0.36569,0.36687  
,0.35643,0.42367,0.30323,0.20139,0.18599,0.23883,0.23033,0.19936,0.229  
5,0.1991,0.23242,0.18817,0.23614,0.17857,0.20201,0.18964,0.22856,0.228  
78,0.12676,0.13808,0.1226,0.12342,0.12667,0.11996,0.12842,0.10826,0.12  
329,0.11981,0.11819,0.1336,0.11357,0.12896,0.13622,0.1197,0.12137,0.10  
15,0.29897,0.49119,0.34072,0.14494,0.2359,0.18121,0.23244,0.22909,0.28  
047,0.14195,0.24009,0.1639,0.2007,0.24016,0.19915,0.20567,0.20632,0.22  
495,0.19632,0.19245,0.11043,0.11152,0.13443,0.1041,0.13345,0.10623,0.1  
2188,0.12567,0.099218,0.12528,0.14141,0.12594,0.1295,0.12529,0.11788,0  
.11811,0.12208,0.12344,0.33138,0.18854,0.19928,0.13246,0.18735,0.2064,  
0.21632,0.14579,0.18464,0.19358,0.2317,0.21453,0.19246,0.18687,0.21579  
,0.22655,0.16925,0.21784,0.21448,0.13484,0.12471,0.12225,0.11878,0.120  
23,0.097324,0.1248,0.1304,0.11595,0.1169,0.11486,0.12771,0.10961,0.122  
54,0.11849,0.12815,0.12451,0.037377,0.24237,0.21236,0.21985,0.15618,0.  
19468,0.17389,0.1733,0.22003,0.19918,0.24076,0.21842,0.2163,0.20632,0.  
21078,0.18456,0.21225,0.17004,0.19466,0.17602,0.12697,0.12414,0.12654,  
0.12481,0.10866,0.13068,0.12251,0.11265,0.12378,0.11961,0.12409,0.1248  
9,0.11827,0.12349,0.13041,0.12154,0.12512,0.04669,0.19681,0.19185,0.17  
988,0.192,0.19657,0.21846,0.23836,0.19719,0.14871,0.20405,0.23464,0.19  
897,0.23494,0.18529,0.206,0.2093,0.18881,0.22071,0.14908,0.12025,0.126  
36,0.13402,0.11503,0.131,0.1328,0.12705,0.11801,0.13566,0.11588,0.1205  
7,0.12844,0.11956,0.12365,0.11978,0.12521,0.12991,0.040764,0.22126,0.1  
5908,0.21313,0.26531,0.18303,0.14088,0.19347,0.17565,0.24116,0.1817,0.  
19918,0.23625,0.21022,0.18145,0.22139,0.19006,0.19586,0.2388,0.11861,0  
.10931,0.13217,0.12313,0.13111,0.12168,0.11063,0.12194,0.11964,0.12256  
,0.12277,0.12009,0.11188,0.12088,0.11769,0.13095,0.11902,0.037895,0.04  
585,0.040504,0.15058,0.23415,0.17499,0.16838,0.16957,0.18005,0.20501,0  
.2178,0.17263,0.18497,0.17393,0.21923,0.21904,0.17241,0.16751,0.13886,  
0.12186,0.12719,0.12971,0.12934,0.10653,0.11972,0.12235,0.12113,0.1188  
3,0.12227,0.10476,0.14078,0.11477,0.095152,0.12175,0.12756,0.12057,0.0  
37871,0.041705,0.035632,0.040335,0.16513,0.18372,0.17015,0.18035,0.131  
4,0.18781,0.095342,0.18771,0.20949,0.21181,0.18646,0.22017,0.11373,0.1  
5413,0.13607,0.12106,0.1275,0.10412,0.12137,0.1272,0.12932,0.14655,0.1  
1826,0.12258,0.1007,0.125,0.11996,0.10633,0.11195,0.104,0.12,0.12587,0  
.041998,0.037432,0.03711,0.040778,0.041534,0.041506,0.20753,0.23294,0.  
17646,0.16321,0.21495,0.13085,0.24924,0.21421,0.12127,0.11236,0.098366  
,0.13319,0.12221,0.11863,0.12533,0.11113,0.12404,0.14945,0.11612,0.121



1, 0.1376, 0.12706, 0.1461, 0.1193, 0.11889, 0.12299, 0.12144, 0.12054, 0.12073  
, 0.14136, 0.12661, 0.0463, 0.039755, 0.042834, 0.030531, 0.03593, 0.030625, 0.  
20587, 0.19042, 0.21353, 0.22593, 0.19278, 0.040248, 0.044853, 0.11887, 0.1201  
7, 0.10337, 0.12027, 0.12018, 0.11904, 0.10946, 0.12514, 0.11372, 0.11867, 0.12  
585, 0.10645, 0.1198, 0.11859, 0.13179, 0.13385, 0.12582, 0.11592, 0.12217, 0.0  
94849, 0.12665, 0.040557, 0.03052, 0.047983, 0.032156, 0.041821, 0.037078, 0.0  
36049, 0.040551, 0.040058, 0.044929, 0.21229, 0.19648, 0.044271, 0.034083, 0.0  
38251, 0.030954, 0.11193, 0.12099, 0.10958, 0.12258, 0.099407, 0.12907, 0.1173  
2, 0.11677, 0.12366, 0.1094, 0.11979, 0.11654, 0.11573, 0.11404, 0.11102, 0.130  
13, 0.12123, 0.12775, 0.12689, 0.039918, 0.035282, 0.042048, 0.039732, 0.03496  
8, 0.037392, 0.034966, 0.035867, 0.041147, 0.040435, 0.036222, 0.043458, 0.039  
62, 0.0354, 0.035087, 0.042239, 0.045139, 0.13472, 0.11736, 0.1255, 0.1212, 0.1  
1549, 0.11434, 0.11446, 0.12327, 0.1112, 0.12479, 0.13182, 0.12166, 0.12306, 0.  
12278, 0.10788, 0.12149, 0.032984, 0.044812, 0.038783, 0.041719, 0.042664, 0.0  
35653, 0.044902, 0.041947, 0.04954, 0.041915, 0.041252, 0.040688, 0.041552, 0.  
03801, 0.03803, 0.035983, 0.039308, 0.040626, 0.044772, 0.1345, 0.10762, 0.125  
17, 0.11209, 0.10665, 0.13425, 0.12324, 0.12633, 0.12213, 0.12163, 0.12595, 0.1  
2545, 0.12474, 0.036474, 0.045379, 0.035482, 0.039547, 0.038959, 0.03918, 0.03  
7734, 0.047619, 0.044267, 0.041061, 0.040854, 0.03592, 0.039525, 0.037796, 0.0  
34572, 0.044505, 0.042245, 0.032329, 0.035854, 0.047186, 0.047907, 0.12547, 0.  
12574, 0.12286, 0.10482, 0.14882, 0.12246, 0.12423, 0.11902, 0.12166, 0.035605  
, 0.040402, 0.04569, 0.032454, 0.042746, 0.037827, 0.046055, 0.048937, 0.03730  
7, 0.041908, 0.033785, 0.043467, 0.040195, 0.047429, 0.042695, 0.033766, 0.048  
146, 0.043529, 0.038042, 0.043498, 0.033232, 0.044848, 0.041172, 0.039039, 0.0  
3769, 0.11785, 0.11362, 0.12093, 0.12528, 0.034103, 0.042706, 0.04235, 0.03490  
3, 0.039904, 0.038575, 0.036434, 0.03939, 0.035813, 0.042141, 0.04081, 0.04162  
2, 0.041013, 0.037814, 0.040943, 0.043527, 0.040846, 0.031717, 0.038376, 0.037  
3, 0.039672, 0.041169, 0.039965, 0.04683, 0.039496, 0.035019, 0.037196, 0.0386  
24, 0.046963, 0.042214, 0.036413, 0.03769, 0.04518, 0.040614, 0.041884, 0.0401  
43, 0.037456, 0.04047, 0.044465, 0.034434, 0.038979, 0.036229, 0.044304, 0.042  
659, 0.042361, 0.038484, 0.040768, 0.038986, 0.043892, 0.031003, 0.036142, 0.0  
43569, 0.046467, 0.038919, 0.044285, 0.047155, 0.04267, 0.039068, 0.040213, 0.  
040667, 0.041443, 0.036732, 0.036246, 0.038874, 0.047043, 0.04193, 0.04012, 0.  
031428, 0.040231, 0.040329, 0.038914, 0.045384, 0.035479, 0.041196, 0.043896,  
0.036971, 0.040361, 0.040443, 0.048247, 0.032885, 0.039535, 0.042803, 0.0348,  
0.039712, 0.045629, 0.038847, 0.045212, 0.042697, 0.045384, 0.03989, 0.040195  
, 0.031303, 0.031216, 0.039573, 0.037314, 0.044862, 0.041597, 0.04407, 0.04324  
9, 0.041554, 0.047008, 0.033197, 0.042605, 0.041834, 0.038629, 0.03691, 0.0347  
08, 0.04079, 0.03613, 0.04558, 0.037546, 0.043425, 0.034294, 0.038513, 0.03728  
8, 0.039591, 0.041622, 0.041159, 0.036815, 0.035223, 0.0413, 0.042688, 0.03502  
1, 0.039202, 0.037836, 0.034093, 0.041754, 0.046342, 0.043492, 0.037281, 0.041  
908, 0.041048, 0.041406, 0.034119, 0.035434, 0.042253, 0.040515, 0.042912, 0.0  
39053, 0.041144, 0.033011, 0.046561, 0.045603, 0.042471, 0.042495, 0.041547, 0.  
.039962, 0.042838, 0.040519, 0.047683, 0.043792, 0.042302, 0.035206, 0.037652  
, 0.039016, 0.03596, 0.036274, 0.039489, 0.035877, 0.041559, 0.043127, 0.03749  
3, 0.044396, 0.028996, 0.042112, 0.04192, 0.036597, 0.039651, 0.046634, 0.0429  
67, 0.040003, 0.037122, 0.041204, 0.033741, 0.046199, 0.039162, 0.041455, 0.03  
8709, 0.033625, 0.034404, 0.038725, 0.042335, 0.037416, 0.038766, 0.036859, 0.  
043338, 0.038598, 0.030851, 0.032737, 0.040304, 0.036068, 0.0425, 0.039654, 0.  
041742, 0.041367

```
#simdataS2SNR15:

Kep_f=1.2
Kep_f=1.2
Kep_s=0.1
Ktrans_f=0.05
Ktrans_s=0.03
del_t=0.5
gtSf=0           0           0           0           0           0           0           0
0              0              0              0              0              0              0              0
0              0              0              0              0              0              0              0
0              0              0              0              0              0              0              0
0              0              0              0              0              0              0              0
0              0              0              0              0              0              0              0
0              0              0              0              0              0              0              0
0              0              0              0              0              0              0              0
0              0              0              0              0              0              0              0
0              0              0              0              0              0              0              0
0              0              0              0              0              0              0              0
0              0              0              0              0              0              0              0
0              0              0              0              0              0              0              0
0              0              0              0              0              0              0              0
0              0              0              0              0              0              0              0
0              0              0              0              0              0              0              0
0              0              0              0              0              0              0              0
0              0              0              0              0              0              0              0
0              0              0              0              0              0              0              0
0              0              0              0              0              0              0              0
0              0              0              0              0              0              0              0
0              0              0              0              0              0              0              0
0              0              0              0              0              0              0              0
0              0              0              0              0              0              0              0
0              0              0              0              0              0              0              0
0              0              0              0              0              0              0              0
0              0              0              0              0              0              0              0
0              0              0              0              0              0              0              0
0              0              0              0              0              0              0              0
0              0              0              0              0              0              0              0
0              0              0              0              0              0              0              0
0              0              0              0              0              0              0              0
0              0              0              0              0              0              0              0
0.6249        0.5            0.5            0.50711        0.49981        0.46367
0              0              0              0              0              0              0              0
0              0              0              0              0              0              0              0
0              0              0              0              0              0              0              0
```

|         |         |         |         |         |         |         |
|---------|---------|---------|---------|---------|---------|---------|
| 0       | 0       | 0       | 0       | 0       | 0       | 0       |
| 0       | 0       | 0       | 0       | 0       | 0.5     | 0.48525 |
| 0.41067 | 0.50943 | 0.5     | 0.5     | 0.5     | 0.5     | 0.46467 |
| 0.50993 | 0       | 0       | 0       | 0       | 0       | 0       |
| 0       | 0       | 0       | 0       | 0       | 0       | 0       |
| 0       | 0       | 0       | 0       | 0       | 0       | 0       |
| 0       | 0       | 0       | 0       | 0       | 0       | 0       |
| 0       | 0       | 0       | 0.54852 | 0.48907 | 0.46755 |         |
| 0.50748 | 0.38761 | 0.48129 | 0.54817 | 0.49418 | 0.49461 |         |
| 0.38803 | 0.49229 | 0.5     | 0       | 0       | 0       | 0       |
| 0       | 0       | 0       | 0       | 0       | 0       | 0       |
| 0       | 0       | 0       | 0       | 0       | 0       | 0       |
| 0       | 0       | 0       | 0       | 0       | 0       | 0       |
| 0       | 0.53529 | 0.3797  | 0.5732  | 0.57134 | 0.48624 |         |
| 0.51084 | 0.5     | 0.5     | 0.49068 | 0.48677 | 0.5     |         |
| 0.42862 | 0.46112 | 0.33857 | 0.48491 | 0       | 0       |         |
| 0       | 0       | 0       | 0       | 0       | 0       |         |
| 0       | 0       | 0       | 0       | 0       | 0       |         |
| 0       | 0       | 0       | 0       | 0       | 0       |         |
| 0.5     | 0.5     | 0.50657 | 0.51368 | 0.5     | 0.5     |         |
| 0.54053 | 0.5     | 0.46168 | 0.51399 | 0.58305 | 0.5     |         |
| 0.5     | 0.49936 | 0.5     | 0.60896 | 0.54338 | 0.47228 |         |
| 0       | 0       | 0       | 0       | 0       | 0       |         |
| 0       | 0       | 0       | 0       | 0       | 0.27461 |         |
| 0.38035 | 0.3181  | 0.33818 | 0.34804 | 0.27702 | 0.27259 |         |
| 0.33486 | 0.31473 | 0.46932 | 0.41234 | 0.55228 | 0.60093 |         |
| 0.5     | 0.38453 | 0.46755 | 0.5     | 0.45593 | 0.61859 |         |
| 0.51618 | 0.5     | 0.51233 | 0.5     | 0.47069 | 0.51655 |         |
| 0.5     | 0.52352 | 0       | 0       | 0       | 0       |         |
| 0       | 0       | 0       | 0       | 0       | 0.54958 |         |
| 0.33333 | 0.35738 | 0.25453 | 0.35236 | 0.24293 | 0.34865 |         |
| 0.27406 | 0.3641  | 0.33333 | 0.30245 | 0.5     | 0.4744  |         |
| 0.4223  | 0.5     | 0.51841 | 0.38712 | 0.35922 | 0.5     |         |
| 0.40917 | 0.49138 | 0.5     | 0.47219 | 0.4119  | 0.55084 |         |
| 0.57523 | 0.5     | 0.55696 | 0.49749 | 0       | 0       |         |
| 0       | 0       | 0       | 0       | 0       | 0.5     |         |
| 0.44292 | 0.36511 | 0.42216 | 0.3427  | 0.33972 | 0.31627 |         |
| 0.355   | 0.38578 | 0.31716 | 0.3075  | 0.28026 | 0.38472 |         |
| 0.5     | 0.5     | 0.43893 | 0.54046 | 0.50862 | 0.50705 |         |
| 0.49631 | 0.38195 | 0.5     | 0.49508 | 0.54683 | 0.48559 |         |
| 0.51449 | 0.5     | 0.54487 | 0.55139 | 0.51143 | 0.42555 |         |
| 0       | 0       | 0       | 0       | 0       | 0       |         |
| 0.47298 | 0.48523 | 0.5     | 0.52025 | 0.50127 | 0.25937 |         |
| 0.33382 | 0.33367 | 0.3541  | 0.279   | 0.34019 | 0.33882 |         |
| 0.34197 | 0.25316 | 0.50672 | 0.49514 | 0.50857 | 0.5     |         |
| 0.55332 | 0.5     | 0.53918 | 0.51123 | 0.4776  | 0.46389 |         |
| 0.37577 | 0.5     | 0.5     | 0.54611 | 0.42303 | 0.45521 |         |
| 0.58121 | 0.5     | 0       | 0       | 0       | 0       |         |
| 0       | 0.43956 | 0.5     | 0.5069  | 0.46393 | 0.56023 |         |
| 0.65532 | 0.3409  | 0.27168 | 0.35855 | 0.35146 | 0.38613 |         |
| 0.25389 | 0.37757 | 0.33333 | 0.28254 | 0.40842 | 0.58355 |         |
| 0.41145 | 0.52048 | 0.61592 | 0.49859 | 0.53117 | 0.41939 |         |

|         |         |         |         |         |         |
|---------|---------|---------|---------|---------|---------|
| 0.57825 | 0.5     | 0.55656 | 0.50157 | 0.5     | 0.51293 |
| 0.47783 | 0.43314 | 0.54892 | 0.5     | 0       | 0       |
| 0       | 0.5     | 0.5     | 0.5     | 0.46311 | 0.5     |
| 0.41389 | 0.5477  | 0.47856 | 0.30979 | 0.36122 | 0.36432 |
| 0.27088 | 0.37101 | 0.32128 | 0.40846 | 0.36306 | 0.35101 |
| 0.52506 | 0.5     | 0.57531 | 0.5     | 0.56182 | 0.45921 |
| 0.43116 | 0.48807 | 0.5     | 0.57    | 0.49321 | 0.49807 |
| 0.46925 | 0.41146 | 0.55282 | 0.5     | 0.5     | 0.5     |
| 0       | 0.47533 | 0.39133 | 0.5     | 0.55245 | 0.5     |
| 0.52519 | 0.5     | 0.5     | 0.50806 | 0.33333 | 0.33426 |
| 0.35814 | 0.33552 | 0.25467 | 0.3597  | 0.34003 | 0.30363 |
| 0.33333 | 0.5     | 0.5     | 0.49595 | 0.49926 | 0.52947 |
| 0.55048 | 0.5286  | 0.5     | 0.46581 | 0.47165 | 0.5     |
| 0.5     | 0.52555 | 0.46129 | 0.34056 | 0.509   | 0.58827 |
| 1       | 0.5     | 0.5     | 0.5     | 0.5265  | 0.5     |
| 0.60865 | 0.54003 | 0.41905 | 0.5     | 0.35879 | 0.23469 |
| 0.41424 | 0.38557 | 0.33333 | 0.33333 | 0.35099 | 0.31717 |
| 0.36672 | 0.36827 | 0.5     | 0.5     | 0.47917 | 0.50336 |
| 0.50922 | 0.66504 | 0.5     | 0.5613  | 0.46629 | 0.52681 |
| 0.44621 | 0.51817 | 0.50193 | 0.48721 | 0.5     | 0.50068 |
| 0.5     | 1       | 0.41677 | 0.5     | 0.5     | 0.42642 |
| 0.48726 | 0.56742 | 0.53614 | 0.61739 | 0.60865 | 0.48016 |
| 0.35776 | 0.2356  | 0.41043 | 0.41629 | 0.32807 | 0.27377 |
| 0.27727 | 0.21824 | 0.51201 | 0.5     | 0.5     | 0.49199 |
| 0.49888 | 0.59914 | 0.38072 | 0.47391 | 0.47479 | 0.48719 |
| 0.46028 | 0.5     | 0.5     | 0.5     | 0.55518 | 0.5     |
| 0.52357 | 0.5     | 1       | 0.50986 | 0.36088 | 0.5136  |
| 0.5     | 0.48767 | 0.52922 | 0.54751 | 0.45811 | 0.5459  |
| 0.5     | 0.3159  | 0.39207 | 0.35428 | 0.33964 | 0.27526 |
| 0.38799 | 0.41871 | 0.33572 | 0.42025 | 0.5     | 0.5     |
| 0.50848 | 0.50379 | 0.3519  | 0.53438 | 0.49778 | 0.51111 |
| 0.47872 | 0.49542 | 0.51634 | 0.5773  | 0.5458  | 0.55986 |
| 0.49907 | 0.41907 | 1       | 1       | 1       | 0.51116 |
| 0.52348 | 0.5     | 0.50147 | 0.48128 | 0.5     | 0.52999 |
| 0.50127 | 0.5     | 0.37153 | 0.35368 | 0.33333 | 0.43612 |
| 0.40384 | 0.29743 | 0.63267 | 0.47662 | 0.45554 | 0.50499 |
| 0.50223 | 0.5     | 0.54453 | 0.4675  | 0.57588 | 0.45317 |
| 0.5     | 0.5613  | 0.52598 | 0.51222 | 0.5499  | 0.55391 |
| 0.49439 | 0.51016 | 1       | 1       | 1       | 1       |
| 0.68241 | 0.50876 | 0.57721 | 0.65354 | 0.5     | 0.5     |
| 0.44378 | 0.41495 | 0.44787 | 0.28067 | 0.29832 | 0.28283 |
| 0.39051 | 0.53783 | 0.6052  | 0.56072 | 0.41715 | 0.42651 |
| 0.37723 | 0.55916 | 0.4709  | 0.5     | 0.42263 | 0.43923 |
| 0.49363 | 0.40284 | 0.49914 | 0.4911  | 0.47666 | 0.45835 |
| 0.58854 | 0.5     | 1       | 1       | 1       | 1       |
| 1       | 1       | 0.46149 | 0.5     | 0.38172 | 0.50335 |
| 0.54654 | 0.49123 | 0.53332 | 0.48222 | 0.55468 | 0.61871 |
| 0.68045 | 0.49725 | 0.5     | 0.5187  | 0.5     | 0.4799  |
| 0.67309 | 0.5     | 0.44492 | 0.26922 | 0.50784 | 0.51238 |
| 0.33317 | 0.47898 | 0.50466 | 0.66885 | 0.50175 | 0.53279 |
| 0.51926 | 0.53989 | 0.47787 | 1       | 1       | 1       |
| 1       | 1       | 1       | 0.47662 | 0.5     | 0.43275 |



|         |         |         |         |         |         |   |
|---------|---------|---------|---------|---------|---------|---|
| 1       | 1       | 1       | 1       | 1       | 1       | 1 |
| 1       | 1       | 1       | 1       | 1       | 1       | 1 |
| 1       | 1       | 1       | 1       | 1       | 1       | 1 |
| 1       | 1       | 1       | 1       | 1       | 1       | 1 |
| 1       | 1       | 1       | 1       | 1       | 1       | 1 |
| 1       | 1       | 1       | 1       | 1       | 1       | 1 |
| 1       | 1       | 1       | 1       | 1       | 1       | 1 |
| 1       | 1       | 1       | 1       | 1       | 1       | 1 |
| 1       | 1       | 1       | 1       | 1       | 1       | 1 |
| 1       | 1       | 1       | 1       | 1       | 1       | 1 |
| 1       | 1       | 1       | 1       | 1       | 1       | 1 |
| 1       | 1       | 1       | 1       | 1       | 1       | 1 |
| gtSs=1  | 1       | 1       | 1       | 1       | 1       | 1 |
| 1       | 1       | 1       | 1       | 1       | 1       | 1 |
| 1       | 1       | 1       | 1       | 1       | 1       | 1 |
| 1       | 1       | 0.41639 | 0.5212  | 0.32567 | 0.48958 |   |
| 1       | 1       | 1       | 1       | 1       | 1       |   |
| 1       | 1       | 1       | 1       | 1       | 1       |   |
| 1       | 1       | 1       | 0       | 0.49747 | 0.5     |   |
| 0.5     | 0.5     | 0.51805 | 0.5     | 1       | 1       |   |
| 1       | 1       | 1       | 1       | 1       | 1       |   |
| 1       | 1       | 1       | 1       | 1       | 1       |   |
| 1       | 0       | 0       | 0.5     | 0.43478 | 0.61042 |   |
| 0.50058 | 0.50173 | 0.50515 | 0.51762 | 0.5     |         | 1 |
| 1       | 1       | 1       | 1       | 1       | 1       |   |
| 1       | 1       | 1       | 1       | 1       | 1       |   |
| 1       | 1       | 0       | 0       | 0       | 0.73708 |   |
| 0.32107 | 0.50026 | 0.5     | 0.5     | 0.54691 | 0.39456 |   |
| 0.46722 | 0.5     | 1       | 1       | 1       | 1       |   |
| 1       | 1       | 1       | 1       | 1       | 1       |   |
| 1       | 1       | 1       | 1       | 1       | 1       |   |
| 0       | 0       | 0       | 0       | 0.49053 | 0.5     |   |
| 0.66871 | 0.49547 | 0.59411 | 0.5     | 0.55966 | 0.45613 |   |
| 0.5     | 0.40933 | 1       | 1       | 1       | 1       |   |
| 1       | 1       | 1       | 1       | 1       | 1       |   |
| 1       | 1       | 1       | 1       | 1       | 1       |   |
| 0       | 0       | 0       | 0       | 0       | 0       |   |
| 0.54584 | 0.41418 | 0.54562 | 0.54346 | 0.51741 | 0.47281 |   |
| 0.51514 | 0.5     | 0.51323 | 0.539   | 1       | 1       |   |
| 1       | 1       | 1       | 1       | 1       | 1       |   |
| 1       | 1       | 1       | 1       | 1       | 1       |   |
| 1       | 1       | 1       | 0       | 0       | 0       |   |
| 0       | 0       | 0       | 0.52137 | 0.5799  | 0.51226 |   |
| 0.43667 | 0.44593 | 0.45694 | 0.5     | 0.5     | 0.51816 |   |
| 0.5     | 0.48074 | 1       | 1       | 1       | 1       |   |
| 1       | 1       | 1       | 1       | 1       | 1       |   |
| 1       | 1       | 1       | 0.5356  | 0.4129  | 0.5378  |   |
| 1       | 0       | 0       | 0       | 0       | 0       |   |
| 0       | 0       | 0.43764 | 0.49022 | 0.48381 | 0.5     |   |
| 0.44925 | 0.46075 | 0.51437 | 0.5     | 0.48946 | 0.45403 |   |
| 0.53609 | 1       | 1       | 1       | 1       | 1       |   |
| 1       | 1       | 1       | 1       | 1       | 1       |   |

|         |         |         |         |         |         |         |         |
|---------|---------|---------|---------|---------|---------|---------|---------|
| 0.3751  |         | 0.5     |         | 0.5     | 0.49289 | 0.50019 | 0.53633 |
| 1       | 0       |         | 0       |         | 0       | 0       | 0       |
| 0       | 0       | 0.47104 |         | 0.45387 | 0.53684 | 0.47671 |         |
| 0.5     | 0.5     |         | 0.5     |         | 0.5     | 0.47131 | 0.5     |
| 0.60105 |         | 1       |         | 1       | 1       | 1       | 1       |
| 1       | 1       |         | 1       |         | 1       | 0.5     | 0.51475 |
| 0.58933 | 0.49057 |         |         | 0.5     | 0.5     | 0.5     | 0.53533 |
| 0.49007 |         | 1       |         | 0       | 0       | 0       | 0       |
| 0       | 0       |         | 0       | 0.58695 | 0.51435 | 0.52313 |         |
| 0.5     | 0.52544 |         | 0.5     |         | 0.5     | 0.61249 | 0.5     |
| 0.52734 | 0.50892 |         | 0.63984 |         | 1       | 1       | 1       |
| 1       | 1       |         | 1       | 0.45148 | 0.51093 | 0.53245 |         |
| 0.49252 | 0.61239 |         | 0.51871 | 0.45183 | 0.50582 | 0.50539 |         |
| 0.61197 | 0.50771 |         | 0.5     |         | 0       | 0       | 0       |
| 0       | 0       |         | 0       | 0       | 0.59367 | 0.5     |         |
| 0.5     | 0.5     |         | 0.5     | 0.47904 | 0.43391 | 0.5     |         |
| 0.47356 |         | 0.5     | 0.49871 |         | 0.5     | 1       | 1       |
| 1       | 0.46471 | 0.6203  |         | 0.4268  | 0.42866 | 0.51376 |         |
| 0.48916 |         | 0.5     |         | 0.5     | 0.50932 | 0.51323 | 0.5     |
| 0.57138 | 0.53888 |         | 0.66143 |         | 0.51509 | 0       | 0       |
| 0       | 0       |         | 0       |         | 0       | 0       |         |
| 0       | 0.49769 |         | 0.5     | 0.60241 | 0.48916 | 0.62986 |         |
| 0.54474 | 0.54727 |         |         | 0.5     | 0.5     | 0.40029 | 0.47668 |
| 0.5     | 0.5     | 0.49343 |         | 0.48632 |         | 0.5     | 0.5     |
| 0.45947 |         | 0.5     | 0.53832 | 0.48601 | 0.41695 |         | 0.5     |
| 0.5     | 0.50064 |         | 0.5     | 0.39104 | 0.45662 | 0.52772 |         |
| 0       | 0       |         | 0       |         | 0       | 0       |         |
| 0       | 0       |         | 0       | 0.45723 | 0.53457 | 0.32749 |         |
| 0.36822 | 0.34095 |         | 0.32365 | 0.30392 | 0.37539 | 0.31384 |         |
| 0.33486 | 0.34264 |         | 0.53068 | 0.58766 | 0.44772 | 0.39907 |         |
| 0.5     | 0.61547 | 0.53245 |         | 0.5     | 0.54407 | 0.38141 |         |
| 0.48382 |         | 0.5     | 0.48767 |         | 0.5     | 0.52931 | 0.48345 |
| 0.5     | 0.47648 |         | 0       |         | 0       | 0       | 0       |
| 0       | 0       |         | 0       |         | 0       | 0       |         |
| 0.33333 | 0.27992 |         | 0.37718 | 0.35236 | 0.37853 | 0.34865 |         |
| 0.30737 | 0.27181 |         | 0.33333 | 0.47416 | 0.5     | 0.5256  |         |
| 0.5777  |         | 0.5     | 0.48159 | 0.61288 | 0.64078 | 0.5     |         |
| 0.59083 | 0.50862 |         | 0.5     | 0.52781 | 0.5881  | 0.44916 |         |
| 0.42477 |         | 0.5     | 0.44304 | 0.50251 | 0       | 0       | 0       |
| 0       | 0       |         | 0       |         | 0       | 0       |         |
| 0       | 0       | 0.24716 |         | 0.3146  | 0.33972 | 0.34187 |         |
| 0.355   | 0.22844 |         | 0.3549  | 0.3493  | 0.39218 | 0.26614 |         |
| 0.5     | 0.5     | 0.56107 |         | 0.45954 | 0.49138 | 0.49295 |         |
| 0.50369 | 0.61805 |         | 0.5     | 0.50492 | 0.45317 | 0.51441 |         |
| 0.48551 |         | 0.5     | 0.45513 | 0.44861 | 0.48857 | 0.57445 |         |
| 0       | 0       |         | 0       |         | 0       | 0       |         |
| 0       | 0       |         | 0       |         | 0       | 0.31304 |         |
| 0.32854 | 0.33367 |         | 0.29179 | 0.3605  | 0.31962 | 0.30965 |         |
| 0.31606 | 0.37395 |         | 0.49328 | 0.50486 | 0.49143 | 0.5     |         |
| 0.44668 |         | 0.5     | 0.46082 | 0.48877 | 0.5224  | 0.53611 |         |
| 0.62423 |         | 0.5     | 0.5     | 0.45389 | 0.57697 | 0.54479 |         |
| 0.41879 |         | 0.5     | 0       |         | 0       | 0       | 0       |

|         |         |         |         |         |         |   |
|---------|---------|---------|---------|---------|---------|---|
| 0       | 0       | 0       | 0       | 0       | 0       | 0 |
| 0       | 0.3409  | 0.36416 | 0.28289 | 0.29709 | 0.22774 |   |
| 0.40754 | 0.25088 | 0.33333 | 0.35873 | 0.59158 | 0.41645 |   |
| 0.58855 | 0.47952 | 0.38408 | 0.50141 | 0.46883 | 0.58061 |   |
| 0.42175 | 0.5     | 0.44344 | 0.49843 | 0.5     | 0.48707 |   |
| 0.52217 | 0.56686 | 0.45108 | 0.5     | 0       | 0       |   |
| 0       | 0       | 0       | 0       | 0       | 0       |   |
| 0       | 0       | 0       | 0.30259 | 0.29549 | 0.27897 |   |
| 0.35139 | 0.37101 | 0.33936 | 0.19201 | 0.36306 | 0.35101 |   |
| 0.47494 | 0.5     | 0.42469 | 0.5     | 0.43818 | 0.54079 |   |
| 0.56884 | 0.51193 | 0.5     | 0.43    | 0.50679 | 0.50193 |   |
| 0.53075 | 0.58854 | 0.44718 | 0.5     | 0.5     | 0.5     |   |
| 0       | 0       | 0       | 0       | 0       | 0       |   |
| 0       | 0       | 0       | 0       | 0.33333 | 0.33148 |   |
| 0.26164 | 0.33552 | 0.38697 | 0.2806  | 0.31994 | 0.35914 |   |
| 0.33333 | 0.5     | 0.5     | 0.50405 | 0.50074 | 0.47053 |   |
| 0.44952 | 0.4714  | 0.5     | 0.53419 | 0.52835 | 0.5     |   |
| 0.5     | 0.47445 | 0.53871 | 0.65944 | 0.491   | 0.41173 |   |
| 0       | 0       | 0       | 0       | 0       | 0       |   |
| 0       | 0       | 0       | 0       | 0       | 0.38265 |   |
| 0.37518 | 0.38557 | 0.33333 | 0.33333 | 0.35099 | 0.3338  |   |
| 0.36672 | 0.26345 | 0.5     | 0.5     | 0.52083 | 0.49664 |   |
| 0.49078 | 0.33496 | 0.5     | 0.4387  | 0.53371 | 0.47319 |   |
| 0.55379 | 0.48183 | 0.49807 | 0.51279 | 0.5     | 0.49932 |   |
| 0.5     | 0       | 0       | 0       | 0       | 0       |   |
| 0       | 0       | 0       | 0       | 0       | 0       |   |
| 0.35776 | 0.34816 | 0.41019 | 0.20069 | 0.33596 | 0.36312 |   |
| 0.36136 | 0.39088 | 0.48799 | 0.5     | 0.5     | 0.50801 |   |
| 0.50112 | 0.40086 | 0.61928 | 0.52609 | 0.52521 | 0.51281 |   |
| 0.53972 | 0.5     | 0.5     | 0.5     | 0.44482 | 0.5     |   |
| 0.47643 | 0.5     | 0       | 0       | 0       | 0       |   |
| 0       | 0       | 0       | 0       | 0       | 0       |   |
| 0       | 0.34205 | 0.29832 | 0.35428 | 0.34278 | 0.36521 |   |
| 0.22403 | 0.18226 | 0.37794 | 0.57975 | 0.5     | 0.5     |   |
| 0.49152 | 0.49621 | 0.6481  | 0.46562 | 0.50222 | 0.48889 |   |
| 0.52128 | 0.50458 | 0.48366 | 0.4227  | 0.4542  | 0.44014 |   |
| 0.50093 | 0.58093 | 0       | 0       | 0       | 0       |   |
| 0       | 0       | 0       | 0       | 0       | 0       |   |
| 0       | 0       | 0.37153 | 0.35368 | 0.33333 | 0.2588  |   |
| 0.24147 | 0.35128 | 0.36733 | 0.52338 | 0.54446 | 0.49501 |   |
| 0.49777 | 0.5     | 0.45547 | 0.5325  | 0.42412 | 0.54683 |   |
| 0.5     | 0.4387  | 0.47402 | 0.48778 | 0.4501  | 0.44609 |   |
| 0.50561 | 0.48984 | 0       | 0       | 0       | 0       |   |
| 0       | 0       | 0       | 0       | 0       | 0       |   |
| 0       | 0       | 0       | 0.32234 | 0.42908 | 0.39802 |   |
| 0.60949 | 0.46217 | 0.3948  | 0.43928 | 0.58285 | 0.57349 |   |
| 0.62277 | 0.44084 | 0.5291  | 0.5     | 0.57737 | 0.56077 |   |
| 0.50637 | 0.59716 | 0.50086 | 0.5089  | 0.52334 | 0.54165 |   |
| 0.41146 | 0.5     | 0       | 0       | 0       | 0       |   |
| 0       | 0       | 0       | 0       | 0       | 0       |   |
| 0       | 0       | 0       | 0       | 0.44532 | 0.38129 |   |
| 0.31955 | 0.50275 | 0.5     | 0.4813  | 0.5     | 0.5201  |   |





|         |         |         |         |         |         |   |
|---------|---------|---------|---------|---------|---------|---|
| 0       | 0       | 0       | 0       | 0       | 0       | 0 |
| 0       | 0       | 0       | 0       | 0       | 0       | 0 |
| 0       | 0       | 0       | 0       | 0       | 0       | 0 |
| 0       | 0       | 0       | 0       | 0       | 0       | 0 |
| 0       | 0       | 0       | 0       | 0       | 0       | 0 |
| 0       | 0       | 0       | 0       | 0       | 0       | 0 |
| 0       | 0       | 0       | 0       | 0       | 0       | 0 |
| 0       | 0       | 0       | 0       | 0       | 0       | 0 |
| 0       | 0       | 0       | 0       | 0       | 0       | 0 |
| 0       | 0       | 0       | 0       | 0       | 0       | 0 |
| 0       | 0       | 0       | 0       | 0       | 0       | 0 |
| 0       | 0       | 0       | 0       | 0       | 0       | 0 |
| 0       | 0       | 0       | 0       | 0       | 0       | 0 |
| 0       | 0       | 0       | 0       | 0       | 0       | 0 |
| 0       | 0       | 0       | 0       | 0       | 0       | 0 |
| 0       | 0       | 0       | 0       | 0       | 0       | 0 |
| 0       | 0       | 0       | 0       | 0       | 0       | 0 |
| gtSp=0  |         | 0       | 0       | 0       | 0       | 0 |
| 0       | 0       | 0       | 0       | 0       | 0       | 0 |
| 0       | 0       | 0       | 0       | 0       | 0       | 0 |
| 0       | 0       | 0.58361 | 0.4788  | 0.67433 | 0.51042 |   |
| 0       | 0       | 0       | 0       | 0       | 0       | 0 |
| 0       | 0       | 0       | 0       | 0       | 0       | 0 |
| 0       | 0       | 0       | 1       | 0.50253 | 0.5     |   |
| 0.5     | 0.5     | 0.48195 | 0.5     |         | 0       | 0 |
| 0       | 0       | 0       | 0       | 0       | 0       | 0 |
| 0       | 0       | 0       | 0       | 0       | 0       | 0 |
| 0       | 1       | 1       | 0.5     | 0.56522 | 0.38958 |   |
| 0.49942 | 0.49827 | 0.49485 | 0.48238 |         | 0.5     | 0 |
| 0       | 0       | 0       | 0       | 0       | 0       | 0 |
| 0       | 0       | 0       | 0       | 0       | 0       | 0 |
| 0       | 0       | 1       | 1       | 1       | 0.26292 |   |
| 0.67893 | 0.49974 | 0.5     | 0.5     | 0.45309 | 0.60544 |   |
| 0.53278 | 0.5     | 0       | 0       | 0       | 0       | 0 |
| 0       | 0       | 0       | 0       | 0       | 0       | 0 |
| 0       | 0       | 0       | 0       | 0       | 0       | 0 |
| 1       | 1       | 1       | 1       | 0.50947 | 0.5     |   |
| 0.33129 | 0.50453 | 0.40589 | 0.5     | 0.44034 | 0.54387 |   |
| 0.5     | 0.59067 | 0       | 0       | 0       | 0       | 0 |
| 0       | 0       | 0       | 0       | 0       | 0       | 0 |
| 0       | 0       | 0       | 0       | 0       | 0       | 0 |
| 1       | 1       | 1       | 1       | 1       | 1       | 1 |
| 0.45416 | 0.58582 | 0.45438 | 0.45654 | 0.48259 | 0.52719 |   |
| 0.48486 | 0.5     | 0.48677 | 0.461   | 0       | 0       | 0 |
| 0       | 0       | 0       | 0       | 0       | 0       | 0 |
| 0       | 0       | 0       | 0       | 0       | 0       | 0 |
| 0       | 0       | 0       | 1       | 1       | 1       | 1 |
| 1       | 1       | 1       | 0.47863 | 0.4201  | 0.48774 |   |
| 0.56333 | 0.55407 | 0.54306 | 0.5     | 0.5     | 0.48184 |   |
| 0.5     | 0.51926 | 0       | 0       | 0       | 0       | 0 |
| 0       | 0       | 0       | 0       | 0       | 0       | 0 |
| 0       | 0       | 0       | 0       | 0       | 0       | 0 |
| 0       | 1       | 1       | 1       | 1       | 1       | 1 |

|         |         |         |         |         |         |         |   |
|---------|---------|---------|---------|---------|---------|---------|---|
| 1       | 1       | 0.56236 | 0.50978 | 0.51619 | 0.5     |         |   |
| 0.55075 | 0.53925 | 0.48563 |         | 0.5     | 0.51054 | 0.54597 |   |
| 0.46391 | 0       | 0       | 0       | 0       | 0       | 0       | 0 |
| 0       | 0       | 0       | 0       | 0       | 0       | 0       | 0 |
| 0       | 0       | 0       | 0       | 0       | 0       | 0       | 0 |
| 0       | 1       | 1       | 1       | 1       | 1       | 1       | 1 |
| 1       | 1       | 0.52896 | 0.54613 | 0.46316 | 0.52329 |         |   |
| 0.5     | 0.5     | 0.5     | 0.5     | 0.5     | 0.52869 | 0.5     |   |
| 0.39895 | 0       | 0       | 0       | 0       | 0       | 0       | 0 |
| 0       | 0       | 0       | 0       | 0       | 0       | 0       | 0 |
| 0       | 0       | 0       | 0       | 0       | 0       | 0       | 0 |
| 0       | 0       | 1       | 1       | 1       | 1       | 1       | 1 |
| 1       | 1       | 1       | 0.41305 | 0.48565 | 0.47687 |         |   |
| 0.5     | 0.47456 | 0.5     | 0.5     | 0.5     | 0.38751 | 0.5     |   |
| 0.47266 | 0.49108 | 0.36016 |         | 0       | 0       | 0       | 0 |
| 0       | 0       | 0       | 0       | 0       | 0       | 0       | 0 |
| 0       | 0       | 0       | 0       | 0       | 0       | 0       | 0 |
| 0       | 0       | 0       | 0       | 1       | 1       | 1       | 1 |
| 1       | 1       | 1       | 1       | 1       | 0.40633 | 0.5     |   |
| 0.5     | 0.5     | 0.5     | 0.52096 | 0.56609 | 0.5     | 0.5     |   |
| 0.52644 | 0.5     | 0.50129 |         | 0.5     | 0       | 0       | 0 |
| 0       | 0       | 0       | 0       | 0       | 0       | 0       | 0 |
| 0       | 0       | 0       | 0       | 0       | 0       | 0       | 0 |
| 0       | 0       | 0       | 0       | 0       | 1       | 1       | 1 |
| 1       | 1       | 1       | 1       | 1       | 1       | 1       | 1 |
| 1       | 0.50231 | 0.5     | 0.39759 | 0.51084 | 0.37014 |         |   |
| 0.45526 | 0.45273 | 0.5     | 0.5     | 0.5     | 0.59971 | 0.52332 |   |
| 0       | 0       | 0       | 0       | 0       | 0       | 0       | 0 |
| 0       | 0       | 0       | 0       | 0       | 0       | 0       | 0 |
| 0       | 0       | 0       | 0       | 0       | 0       | 0       | 0 |
| 1       | 1       | 1       | 1       | 1       | 1       | 1       | 1 |
| 1       | 1       | 1       | 0.54277 | 0.46543 | 0.3979  |         |   |
| 0.25143 | 0.34095 | 0.33818 | 0.34804 | 0.34759 | 0.41356 |         |   |
| 0.33028 | 0.34264 | 0       | 0       | 0       | 0       | 0       | 0 |
| 0       | 0       | 0       | 0       | 0       | 0       | 0       | 0 |
| 0       | 0       | 0       | 0       | 0       | 0       | 0       | 0 |
| 0       | 0       | 1       | 1       | 1       | 1       | 1       | 1 |
| 1       | 1       | 1       | 1       | 1       | 1       | 0.45042 |   |
| 0.33333 | 0.36269 | 0.36828 | 0.29528 | 0.37853 | 0.3027  |         |   |
| 0.41857 | 0.3641  | 0.33333 | 0.22338 | 0       | 0       | 0       | 0 |
| 0       | 0       | 0       | 0       | 0       | 0       | 0       | 0 |
| 0       | 0       | 0       | 0       | 0       | 0       | 0       | 0 |
| 0       | 0       | 0       | 0       | 1       | 1       | 1       | 1 |
| 1       | 1       | 1       | 1       | 1       | 1       | 0.5     |   |
| 0.55708 | 0.63489 | 0.33068 | 0.3427  | 0.32056 | 0.34187 |         |   |
| 0.29    | 0.38578 | 0.32795 | 0.34321 | 0.32756 | 0.34915 |         |   |
| 0       | 0       | 0       | 0       | 0       | 0       | 0       | 0 |
| 0       | 0       | 0       | 0       | 0       | 0       | 0       | 0 |
| 0       | 0       | 0       | 0       | 0       | 0       | 0       | 0 |
| 1       | 1       | 1       | 1       | 1       | 1       | 1       | 1 |
| 0.52702 | 0.51477 | 0.5     | 0.47975 | 0.49873 | 0.42759 |         |   |
| 0.33763 | 0.33266 | 0.3541  | 0.3605  | 0.34019 | 0.35153 |         |   |

|         |         |         |         |         |         |   |
|---------|---------|---------|---------|---------|---------|---|
| 0.34197 | 0.37289 | 0       | 0       | 0       | 0       | 0 |
| 0       | 0       | 0       | 0       | 0       | 0       | 0 |
| 0       | 0       | 0       | 0       | 0       | 0       | 0 |
| 0       | 0       | 1       | 1       | 1       | 1       | 1 |
| 1       | 0.56044 | 0.5     | 0.4931  | 0.53607 | 0.43977 |   |
| 0.34468 | 0.3182  | 0.36416 | 0.35855 | 0.35146 | 0.38613 |   |
| 0.33857 | 0.37155 | 0.33333 | 0.35873 | 0       | 0       |   |
| 0       | 0       | 0       | 0       | 0       | 0       |   |
| 0       | 0       | 0       | 0       | 0       | 0       |   |
| 0       | 0       | 0       | 0       | 1       | 1       |   |
| 1       | 0.5     | 0.5     | 0.5     | 0.53689 | 0.5     |   |
| 0.58611 | 0.4523  | 0.52144 | 0.38762 | 0.34329 | 0.35671 |   |
| 0.37773 | 0.25798 | 0.33936 | 0.39953 | 0.27388 | 0.29798 |   |
| 0       | 0       | 0       | 0       | 0       | 0       |   |
| 0       | 0       | 0       | 0       | 0       | 0       |   |
| 0       | 0       | 0       | 0       | 0       | 0       |   |
| 1       | 0.52467 | 0.60867 | 0.5     | 0.44755 | 0.5     |   |
| 0.47481 | 0.5     | 0.5     | 0.49194 | 0.33333 | 0.33426 |   |
| 0.38022 | 0.32897 | 0.35836 | 0.3597  | 0.34003 | 0.33723 |   |
| 0.33333 | 0       | 0       | 0       | 0       | 0       |   |
| 0       | 0       | 0       | 0       | 0       | 0       |   |
| 0       | 0       | 0       | 0       | 0       | 0       |   |
| 0       | 0.5     | 0.5     | 0.5     | 0.4735  | 0.5     |   |
| 0.39135 | 0.45997 | 0.58095 | 0.5     | 0.64121 | 0.38265 |   |
| 0.21058 | 0.22887 | 0.33333 | 0.33333 | 0.29802 | 0.34903 |   |
| 0.26656 | 0.36827 | 0       | 0       | 0       | 0       |   |
| 0       | 0       | 0       | 0       | 0       | 0       |   |
| 0       | 0       | 0       | 0       | 0       | 0       |   |
| 0       | 0       | 0.58323 | 0.5     | 0.5     | 0.57358 |   |
| 0.51274 | 0.43258 | 0.46386 | 0.38261 | 0.39135 | 0.51984 |   |
| 0.28447 | 0.41623 | 0.17938 | 0.38302 | 0.33596 | 0.36312 |   |
| 0.36136 | 0.39088 | 0       | 0       | 0       | 0       |   |
| 0       | 0       | 0       | 0       | 0       | 0       |   |
| 0       | 0       | 0       | 0       | 0       | 0       |   |
| 0       | 0       | 0       | 0.49014 | 0.63912 | 0.4864  |   |
| 0.5     | 0.51233 | 0.47078 | 0.45249 | 0.54189 | 0.4541  |   |
| 0.5     | 0.34205 | 0.30961 | 0.29145 | 0.31758 | 0.35952 |   |
| 0.38799 | 0.39903 | 0.28634 | 0       | 0       | 0       | 0 |
| 0       | 0       | 0       | 0       | 0       | 0       |   |
| 0       | 0       | 0       | 0       | 0       | 0       |   |
| 0       | 0       | 0       | 0       | 0       | 0.48884 |   |
| 0.47652 | 0.5     | 0.49853 | 0.51872 | 0.5     | 0.47001 |   |
| 0.49873 | 0.5     | 0.25693 | 0.29263 | 0.33333 | 0.30508 |   |
| 0.35469 | 0.35128 | 0       | 0       | 0       | 0       | 0 |
| 0       | 0       | 0       | 0       | 0       | 0       |   |
| 0       | 0       | 0       | 0       | 0       | 0       |   |
| 0       | 0       | 0       | 0       | 0       | 0       |   |
| 0.31759 | 0.49124 | 0.42279 | 0.34646 | 0.5     | 0.5     |   |
| 0.55622 | 0.58505 | 0.55213 | 0.39699 | 0.2726  | 0.31915 |   |
| 0       | 0       | 0       | 0       | 0       | 0       |   |
| 0       | 0       | 0       | 0       | 0       | 0       |   |
| 0       | 0       | 0       | 0       | 0       | 0       |   |



|   |   |   |   |   |   |   |
|---|---|---|---|---|---|---|
| 0 | 0 | 0 | 0 | 0 | 0 | 0 |
| 0 | 0 | 0 | 0 | 0 | 0 | 0 |
| 0 | 0 | 0 | 0 | 0 | 0 | 0 |
| 0 | 0 | 0 | 0 | 0 | 0 | 0 |
| 0 | 0 | 0 | 0 | 0 | 0 | 0 |
| 0 | 0 | 0 | 0 | 0 | 0 | 0 |
| 0 | 0 | 0 | 0 | 0 | 0 | 0 |
| 0 | 0 | 0 | 0 | 0 | 0 | 0 |
| 0 | 0 | 0 | 0 | 0 | 0 | 0 |
| 0 | 0 | 0 | 0 | 0 | 0 | 0 |
| 0 | 0 | 0 | 0 | 0 | 0 | 0 |
| 0 | 0 | 0 | 0 | 0 | 0 | 0 |
| 0 | 0 | 0 | 0 | 0 | 0 | 0 |
| 0 | 0 | 0 | 0 | 0 | 0 | 0 |
| 0 | 0 | 0 | 0 | 0 | 0 | 0 |
| 0 | 0 | 0 | 0 | 0 | 0 | 0 |
| 0 | 0 | 0 | 0 | 0 | 0 | 0 |
| 0 | 0 | 0 | 0 | 0 | 0 | 0 |
| 0 | 0 | 0 | 0 | 0 | 0 | 0 |
| 0 | 0 | 0 | 0 | 0 | 0 | 0 |
| 0 | 0 | 0 | 0 | 0 | 0 | 0 |

gtTCf=  
0  
0.11925  
0.14534  
0.13574  
0.11593  
0.096197  
0.079948  
0.067704  
0.058926  
0.052819  
0.048646  
0.045817  
0.043898  
0.042582  
0.041662  
0.040998  
0.040498  
0.040102

gtTCs=  
0  
0.07155  
0.116  
0.14393  
0.16177  
0.17342  
0.18126  
0.18671  
0.19067  
0.19366

0.19601  
0.19792  
0.19952  
0.20088  
0.20206  
0.20309  
0.20398  
0.20476

gtTCp=

0  
2.385  
1.5979  
1.1196  
0.8287  
0.65143  
0.54309  
0.47655  
0.43538  
0.4096  
0.39316  
0.38239  
0.37506  
0.36982  
0.36585  
0.36266  
0.35995  
0.35753

X\_mask=

0.0016599,0.00053591,2.2204e-016,0.0013802,0.00064615,2.2204e-  
016,0.0012221,2.2204e-016,0.0033074,8.0669e-  
005,0.0013836,0.0022243,2.2204e-016,2.2204e-016,2.2204e-016,2.2204e-  
016,2.2204e-016,2.2204e-016,0.00083093,0.00034843,2.2204e-  
016,0.0041995,0.00026723,2.2204e-  
016,0.00076709,0.00045776,0.0021593,2.2204e-  
016,0.00083284,0.00092762,2.2204e-016,0.0015764,2.2204e-016,2.2204e-  
016,0.0015715,2.2204e-016,2.2204e-016,2.2204e-016,2.2204e-016,2.2204e-  
016,0.013316,2.2204e-016,0.0058248,2.2204e-  
016,0.012708,0.011764,2.2204e-016,2.2204e-  
016,0.001792,0.0038863,0.0038809,0.0011248,2.2204e-016,2.2204e-  
016,0.0014345,0.00098871,0.00066243,2.6545e-006,2.2204e-  
016,0.0017367,0.0022284,0.0056222,2.2204e-  
016,0.001165,0.012957,0.013303,0.00019873,0.0055139,2.2204e-  
016,2.2204e-016,2.2204e-016,2.2204e-016,0.0020189,0.0016679,2.2204e-  
016,0.0016775,0.0013392,0.00015096,2.2204e-016,2.2204e-  
016,0.0023372,2.2204e-016,2.2204e-016,2.2204e-016,2.2204e-  
016,0.0018207,2.2204e-016,2.2204e-016,2.2204e-016,2.2204e-016,2.2204e-  
016,0.014742,0.01628,0.020502,0.0071364,0.0044811,2.2204e-016,2.2204e-  
016,0.0033338,2.2204e-016,0.00033777,2.2204e-016,0.0029297,2.2204e-  
016,0.00090863,2.2204e-  
016,0.0013928,0.00084417,0.0013951,0.00090933,2.2204e-016,2.2204e-

016,2.2204e-016,2.2204e-016,0.006822,2.2204e-016,2.2204e-016,2.2204e-016,2.2204e-016,2.2204e-016,0.0088954,0.00012181,2.2204e-016,0.00078376,2.2204e-016,0.0080258,2.2204e-016,0.0082285,0.0012485,0.0014024,0.0020031,2.2204e-016,0.0034176,2.2204e-016,0.0016557,2.2204e-016,0.00090817,2.2204e-016,2.2204e-016,2.2204e-016,0.00024975,0.0014194,0.0027616,2.2204e-016,2.2204e-016,2.2204e-016,2.2204e-016,0.015439,0.022325,2.2204e-016,2.2204e-016,0.00035517,0.0081728,0.0035599,0.015382,0.0043615,2.2204e-016,2.2204e-016,0.00247,0.0095688,0.0049214,0.0027007,0.0018162,0.0011167,0.00018005,2.2204e-016,2.2204e-016,0.0020488,2.2204e-016,0.00066582,2.2204e-016,0.00088779,2.2204e-016,0.00029,2.2204e-016,0.0011601,2.2204e-016,8.3242e-005,2.2204e-016,2.2204e-016,2.2204e-016,0.0089931,0.002421,0.016835,2.2204e-016,2.2204e-016,0.0058525,2.2204e-016,0.0063223,0.0063613,2.2204e-016,2.2204e-016,0.0030047,2.2204e-016,2.2204e-016,2.2204e-016,2.2204e-016,0.00071886,2.2204e-016,2.2204e-016,2.2204e-016,2.2204e-016,0.0016576,0.00027313,0.0013882,2.2204e-016,2.2204e-016,2.2204e-016,2.2204e-016,2.2204e-016,2.2204e-016,0.0011663,2.2204e-016,2.2204e-016,0.0025352,0.0053811,2.2204e-016,0.0005556,2.2204e-016,0.0056408,2.2204e-016,0.00037688,2.2204e-016,0.020583,2.2204e-016,2.2204e-016,2.2204e-016,0.0049005,0.0001702,0.0075996,0.0005126,0.0028762,2.2204e-016,2.2204e-016,2.2204e-016,0.00057733,0.00019306,0.0010293,2.2204e-016,2.2204e-016,2.2204e-016,2.2204e-016,2.1119e-005,8.3838e-005,2.2204e-016,2.2204e-016,5.7909e-005,2.2204e-016,2.2204e-016,0.018916,0.013626,0.0026598,0.013897,0.0042217,0.012641,2.2204e-016,0.0031335,2.2204e-016,0.005003,0.0082438,2.2204e-016,2.2204e-016,2.2204e-016,2.2204e-016,2.2204e-016,2.2204e-016,0.0010134,2.2204e-016,0.00029789,2.2204e-016,0.0037899,0.00085128,2.2204e-016,0.0032725,2.2204e-016,2.2204e-016,2.2204e-016,0.0013784,0.00080954,2.2204e-016,0.0020163,0.00057737,2.2204e-016,0.0017622,0.0041007,0.016603,0.0012112,0.016253,2.2204e-016,2.2204e-016,2.2204e-016,2.2204e-016,2.2204e-016,2.2204e-016,0.00031072,0.0073912,0.00074428,2.2204e-016,2.2204e-016,2.2204e-016,2.2204e-016,0.013268,2.2204e-016,2.2204e-016,2.2204e-016,2.2204e-016,2.2204e-016,0.00087355,0.004297,2.2204e-016,0.00099377,6.7495e-005,2.2204e-016,0.00063241,2.2204e-016,2.2204e-016,2.2204e-016,0.0010735,0.00087063,0.00035193,2.2204e-016,0.0014963,0.00014409,2.2204e-016,0.0049422,2.2204e-016,0.0053661,2.2204e-016,0.0040549,0.011134,2.2204e-016,0.00018146,0.0086139,2.2204e-016,0.017418,0.0022577,0.016951,0.012074,0.0038405,2.2204e-016,2.2204e-016,2.2204e-016,0.001917,0.00081305,0.00094645,0.00049152,0.0010719,0.00020104,0.0008248,0.0018404,2.2204e-016,2.2204e-016,2.2204e-016,0.00051576,2.2204e-016,2.2204e-016,2.2204e-016,2.2204e-016,0.0027283,0.00049053,0.0082018,0.0052535,0.013868,0.0062471,2.2204e-016,0.017813,0.02903,0.014247,0.0057897,2.2204e-016,2.2204e-016,2.2204e-016



016,0.020273,0.0053371,0.0095003,0.0060488,0.0062481,2.2204e-  
016,2.2204e-016,2.2204e-016,0.0020817,0.0001894,0.00023385,2.2204e-  
016,0.00031484,2.2204e-016,0.0015658,0.002027,2.2204e-016,2.2204e-  
016,2.2204e-016,0.00096975,2.2204e-016,2.2204e-016,2.2204e-  
016,2.2204e-016,0.00055426,0.00021082,2.2204e-016,0.014138,2.2204e-  
016,2.2204e-016,0.00074934,0.019286,0.0088076,2.2204e-016,2.2204e-  
016,2.2204e-016,0.00078755,0.0041624,0.00051792,2.2204e-  
016,0.0051734,0.014314,2.2204e-016,2.2204e-016,2.2204e-  
016,0.001714,2.2204e-016,1.314e-005,2.2204e-016,0.0010173,2.2204e-  
016,2.2204e-016,0.00022161,2.2204e-016,0.0019053,2.2204e-  
016,0.00047568,0.00079835,2.2204e-016,2.2204e-016,0.0011016,2.2204e-  
016,2.2204e-016,0.00016422,2.2204e-016,2.2204e-016,2.2204e-  
016,0.0051423,2.2204e-016,2.2204e-016,2.2204e-016,2.2204e-  
016,0.019785,0.0031723,0.013103,0.0039969,2.2204e-  
016,0.0030066,0.0034904,0.003156,0.0094208,0.0048364,0.0046772,2.2204e-  
-016,2.2204e-016,2.2204e-016,2.2204e-016,2.2204e-016,2.2204e-  
016,0.00033699,0.00099899,5.827e-006,0.00065479,0.00097336,2.2204e-  
016,0.00011365,2.2204e-016,2.2204e-  
016,0.0018324,0.0011726,0.00061102,2.2204e-016,2.2204e-016,2.2204e-  
016,0.018539,2.2204e-016,0.011272,2.2204e-016,2.2204e-  
016,0.0042614,2.2204e-016,2.2204e-  
016,0.006765,0.0013726,0.0010393,2.2204e-016,0.00020463,2.2204e-  
016,2.2204e-016,2.2204e-016,7.186e-005,0.0074521,0.0010699,2.2204e-  
016,2.2204e-016,0.00079194,0.00076143,8.1745e-005,2.2204e-016,2.2204e-  
016,0.0015284,0.00068906,2.2204e-016,0.00076583,2.2204e-016,2.2204e-  
016,2.2204e-016,0.0013407,2.2204e-016,0.00066178,0.010145,2.2204e-  
016,0.022845,2.2204e-016,0.023352,2.2204e-016,0.0043699,2.2204e-  
016,0.007862,2.2204e-016,2.2204e-016,2.2204e-016,0.0047313,2.2204e-  
016,0.0040842,0.0037404,2.2204e-016,2.2204e-  
016,0.0007655,0.0045137,2.2204e-  
016,0.0006149,0.0002978,0.00049434,2.2204e-016,2.2204e-  
016,0.00063791,2.2204e-016,0.00048428,0.00044404,0.00030653,2.2204e-  
016,2.2204e-  
016,0.00069562,0.001218,0.0010288,0.00030135,0.00013185,2.2204e-  
016,2.2204e-016,0.025946,2.2204e-016,2.2204e-016,2.2204e-  
016,0.01562,2.2204e-016,2.2204e-016,0.00023208,2.2204e-016,2.2204e-  
016,2.2204e-016,2.2204e-016,2.2204e-016,0.012826,2.2204e-  
016,0.0032692,0.0051265,2.2204e-016,0.00087371,2.2204e-  
016,0.00058195,2.2204e-016,2.2204e-  
016,0.00021538,0.0019059,0.0016671,0.0004064,2.2204e-  
016,0.00075413,0.00080621,2.2204e-016,0.00043726,2.2204e-  
016,0.0023786,0.00077205,0.00039523,2.2204e-  
016,0.015727,0.0066993,2.2204e-016,2.2204e-  
016,0.0071834,0.00018354,0.011031,2.2204e-  
016,0.0043561,0.019818,0.014226,0.0084291,2.2204e-016,2.2204e-  
016,0.00045975,2.2204e-016,0.0012395,2.2204e-  
016,0.0010177,0.0012061,0.00098715,2.2204e-016,2.2204e-016,2.2204e-  
016,0.00013269,2.2204e-016,2.2204e-016,0.0012018,0.0012647,2.2204e-  
016,0.0021351,2.2204e-016,2.2204e-016,0.0005463,2.2204e-  
016,0.00046531,2.2204e-016,2.2204e-016,2.2204e-016,2.2204e-  
016,2.2204e-016,2.2204e-016,0.0085129,2.2204e-  
016,0.0054039,0.007479,2.2204e-016,2.2204e-016,2.2204e-

016,0.0016671,2.2204e-016,0.0057051,2.2204e-  
016,0.001776,0.00030869,2.2204e-016,2.2204e-  
016,0.0015114,0.000672,2.2204e-016,0.00072695,2.2204e-  
016,0.00080655,2.2204e-016,2.2204e-016,2.2204e-016,0.00088732,2.2204e-  
016,2.2204e-016,0.00038093,0.00074384,0.0011924,2.2204e-  
016,0.0011019,2.2204e-  
016,0.020567,0.01375,0.0037154,0.01513,0.014715,2.2204e-016,2.2204e-  
016,0.0015972,0.0037812,0.0093137,2.2204e-  
016,0.00049369,0.0010827,0.0019242,2.2204e-016,2.2204e-  
016,0.0052334,2.2204e-016,0.00061283,0.0006103,2.2204e-  
016,0.001224,2.2204e-016,0.0023932,0.0014165,0.001575,2.2204e-  
016,2.2204e-016,0.00097647,0.00099387,2.2204e-  
016,0.00119,0.0005864,2.2204e-016,2.2204e-016,2.5178e-005,2.2204e-  
016,2.2204e-016,0.00080466,2.2204e-016,2.2204e-016,2.2204e-  
016,2.2204e-016,0.0031851,0.0037,2.2204e-016,2.2204e-  
016,0.0010937,0.0033564,0.00032306,2.2204e-016,2.2204e-016,2.2204e-  
016,0.0018675,2.2204e-016,0.00096355,0.001352,2.2204e-  
016,0.0010375,2.2204e-016,0.00025194,2.2204e-  
016,0.00093249,0.00042613,2.2204e-016,0.00029571,0.0014835,2.2204e-  
016,2.2204e-  
016,0.00018538,0.0002274,0.00072973,0.0017642,0.010254,2.2204e-  
016,2.2204e-016,2.2204e-016,0.0058303,0.00021736,0.0031303,2.2204e-  
016,2.2204e-016,0.0027574,2.2204e-016,0.0070111,2.2204e-  
016,0.0010726,0.0083666,2.2204e-016,0.0024433,0.0015851,2.2204e-  
016,2.2204e-016,2.2204e-016,2.2204e-016,2.2204e-  
016,0.00097328,2.2204e-016,2.2204e-016,2.2204e-016,2.2204e-  
016,2.2204e-016,0.00081483,0.00043616,2.2204e-016,0.00024867,2.2204e-  
016,0.00047562,2.2204e-016,0.00046015,2.2204e-016,2.2204e-  
016,0.0012986,2.2204e-016,0.0051979,0.0025401,2.2204e-016,2.2204e-  
016,2.2204e-016,2.2204e-016,2.2204e-016,0.005269,0.0011287,2.2204e-  
016,2.2204e-016,0.008103,2.2204e-016,0.0017496,0.00034043,2.2204e-  
016,0.00015038,0.00051563,2.2204e-016,2.2204e-016,4.4429e-  
005,0.0013412,2.2204e-016,3.0457e-005,2.2204e-016,2.2204e-016,2.2204e-  
016,2.2204e-016,0.00056842,2.2204e-016,0.0016315,2.2204e-016,2.2204e-  
016,2.2204e-016,2.2204e-016,0.001926,0.0023305,0.011672,2.2204e-  
016,2.2204e-016,2.2204e-016,2.2204e-016,0.0074714,2.2204e-  
016,0.00089792,0.0036766,0.00041054,2.2204e-016,0.0011485,4.4997e-  
005,2.2204e-  
016,0.00015046,0.00020291,0.00075996,0.0011392,0.0006963,2.2204e-  
016,2.2204e-016,2.2204e-016,2.2204e-016,2.2204e-016,2.2204e-  
016,2.2204e-016,2.2204e-016,0.00010001,9.6309e-005,2.2204e-  
016,0.00104,0.00056155,2.2204e-016,2.2204e-016,0.0002682,2.2204e-  
016,2.2204e-016,2.2204e-016,0.013738,2.2204e-  
016,0.0020102,0.0026568,2.2204e-016,2.2204e-016,2.2204e-  
016,0.0017943,0.00047021,2.2204e-016,0.0013236,2.2204e-016,2.2204e-  
016,2.2204e-016,2.2204e-016,2.2204e-016,2.2204e-016,2.2204e-  
016,2.2204e-016,0.0011465,0.00068743,2.2204e-016,0.0008553,2.2204e-  
016,0.0012169,2.2204e-016,2.2204e-016,2.2204e-016,2.2204e-016,2.2204e-  
016,2.2204e-016,2.2204e-016,2.2204e-016,0.0018678,0.01777,2.2204e-  
016,2.2204e-016,0.012507,2.2204e-016,2.2204e-016,2.2204e-  
016,0.0011452,0.00022593,0.00064105,2.2204e-  
016,0.00016078,0.0004506,0.001466,0.00074469,2.2204e-016,2.2204e-

016, 2.2204e-016, 0.0011723, 2.2204e-016, 0.0012845, 0.00045349, 2.2204e-016, 0.00066962, 0.00082052, 0.00029555, 0.0010336, 0.0004947, 0.0008115, 0.0035743, 2.2204e-016, 0.0022946, 2.2204e-016, 2.2204e-016, 0.0017985, 0.0018889, 2.2204e-016, 2.2204e-016, 2.2204e-016, 2.2204e-016, 0.0015852, 0.0013611, 2.2204e-016, 0.00060614, 2.2204e-016, 2.2204e-016, 0.00058748, 2.2204e-016, 0.00010659, 0.0002259, 2.2204e-016, 2.2204e-016, 2.2204e-016, 0.00020032, 0.00049596, 0.00018104, 2.2204e-016, 2.2204e-016, 2.2204e-016, 2.2204e-016, 0.0015547, 0.0012853, 0.001179, 2.2204e-016, 0.00058059, 0.00081942, 0.0010344, 0.00053769, 2.2204e-016, 2.2204e-016, 2.2204e-016, 2.2204e-016, 2.2204e-016, 2.2204e-016, 0.0013225, 0.0020407, 2.2204e-016, 0.00056968, 2.2204e-016, 0.00093384, 0.00076685, 0.00091591, 2.2204e-016, 0.0011272, 2.2204e-016, 2.2204e-016, 2.2204e-016, 0.0028121, 0.0018599, 2.2204e-016, 0.00083829, 0.00048274, 2.2204e-016, 0.0015249, 2.2204e-016, 2.2204e-016, 0.001643, 2.2204e-016, 0.001116, 0.0011451, 0.00088964, 2.2204e-016, 2.2204e-016, 0.0026573, 0.0025298, 0.00076189, 2.2204e-016, 0.00087439, 0.0014026, 2.2204e-016, 0.0035899, 2.2204e-016, 2.2204e-016, 2.2204e-016, 6.9884e-005, 2.2204e-016, 0.00053929, 2.2204e-016, 2.2204e-016, 1.4188e-005, 2.2204e-016, 2.2204e-016, 2.2204e-016, 0.0016938, 2.2204e-016, 0.0010462, 2.2204e-016, 0.00015791, 2.2204e-016, 0.00026239, 2.2204e-016, 0.00063015, 2.2204e-016, 2.2204e-016, 0.00036208, 0.0012371, 2.2204e-016, 0.00045699, 0.00069057, 0.00043776, 2.2204e-016, 2.2204e-016, 0.0021313, 2.2204e-016, 2.2204e-016, 2.2204e-016, 0.00066413, 0.0011478, 0.0013488, 2.2204e-016, 2.2204e-016, 0.00031331, 0.0010662, 9.48e-005, 2.2204e-016, 2.2204e-016, 2.2204e-016, 2.2204e-016, 2.2204e-016, 0.0027278, 2.2204e-016, 0.00022928, 0.0017742, 2.2204e-016, 0.0013307, 2.2204e-016, 0.0013021, 0.0013911, 0.0027009, 2.2204e-016, 2.2204e-016, 2.2204e-016, 2.2204e-016, 0.0013553, 0.0002906, 2.2204e-016, 0.00058154, 8.9369e-005, 0.0001541, 2.2204e-016, 0.001228, 0.0014242, 0.00081578, 2.2204e-016, 0.0010068, 0.00018768, 2.2204e-016, 2.2204e-016, 2.2204e-016, 0.0011953, 0.00082488, 2.2204e-016, 2.2204e-016, 2.2204e-016, 2.2204e-016, 2.2204e-016, 0.00077831, 0.00069343, 2.2204e-016, 0.0017637, 2.2204e-016, 0.00074971, 0.002757, 2.2204e-016, 0.001759, 2.2204e-016, 2.2204e-016, 0.0012767, 2.2204e-016, 0.00062808, 0.00090048, 0.00047944, 0.0024312, 0.0018098, 0.00086736, 2.2204e-016, 2.2204e-016, 2.2204e-016, 2.2204e-016, 0.0017041, 0.0035742, 0.00079468, 2.2204e-016, 0.0016155, 0.00014175, 2.2204e-016, 2.2204e-016, 2.2204e-016, 0.0022554, 0.00021823, 0.0010306, 2.2204e-016, 0.001131, 2.2204e-016, 0.0005843, 2.2204e-016, 0.0012471, 2.2204e-016, 2.2204e-016, 2.2204e-016, 2.2204e-016, 2.2204e-016, 2.2204e-016, 0.00054787, 2.2204e-016, 0.0002591, 2.2204e-016, 6.5411e-005, 2.2204e-016, 2.2204e-016, 0.00070506, 2.2204e-016, 0.0015124, 0.0015397, 2.2204e-016, 2.2204e-016, 2.2204e-016, 0.0019393, 0.0035012, 0.0022766, 2.2204e-016, 2.2204e-016, 2.2204e-016, 2.2204e-016, 0.00099208, 0.00015983, 0.00019842, 0.00037721, 2.2204e-016, 0.00055021, 0.00091585, 2.2204e-016, 2.2204e-016, 2.2204e-016, 2.2204e-016, 2.2204e-016, 2.2204e-016, 0.0011222, 2.2204e-016, 2.2204e-016, 2.2204e-016, 2.2204e-016, 0.00031097, 0.0012355, 2.2204e-016, 0.0001535, 5.2112e-005, 2.2204e-016, 2.2204e-016, 2.2204e-016, 0.0029634, 0.00038156, 2.2204e-016, 2.2204e-016, 0.0016916, 0.00094225, 2.2204e-016, 2.2204e-016, 2.2204e-016, 2.2204e-016

016,0.0013308,0.00091046,2.2204e-016,0.0017085,2.2204e-  
016,0.00068849,2.2204e-016,0.00055412,0.0017563,2.2204e-016,2.2204e-  
016,0.00040869,0.0013134,0.001159,2.2204e-  
016,0.0023062,0.00012278,0.0017712,0.00059091,0.00063997,2.2204e-  
016,0.00045339,2.2204e-016,0.00047943,2.2204e-016,2.2204e-016,2.2204e-  
016,0.00017749,0.0015514,2.2204e-016,2.2204e-  
016,0.00022606,0.00077262,0.0018478,0.00017783,0.0030552,0.0039242,0.0  
0017381,0.00046101,0.0021765,2.2204e-016,2.2204e-  
016,0.0015992,2.2204e-016,2.2204e-016,0.0022136,2.2204e-  
016,0.00089893,0.00019742,2.2204e-016,2.2204e-  
016,0.0010495,0.0015481,2.2204e-016,0.00030384,0.0027268,2.2204e-  
016,0.00015345,0.0019068,0.00059329,0.00067801,2.2204e-016,2.2204e-  
016,0.00073036,2.2204e-016,0.00064672,2.2204e-016,2.2204e-  
016,0.00048347,2.2204e-016,2.2204e-016,2.2204e-016,0.00070487,2.2204e-  
016,2.2204e-016,2.2204e-016,2.2204e-  
016,0.0019054,0.00094676,0.0007647,0.0025078,0.00097461,0.00033605,0.0  
014338,0.0021169  
0.073304,0.071256,0.070083,0.075148,0.072426,0.070514,0.071997,0.07068  
3,0.074673,0.070685,0.071731,0.07336,0.070665,0.069506,0.071001,0.0707  
71,0.068972,0.071791,0.074091,0.071969,1.4308,1.1799,1.6357,1.2361,0.0  
70793,0.07264,0.074354,0.071171,0.072167,0.072001,0.070617,0.071791,0.  
069702,0.070125,0.073608,0.068729,0.068937,0.068877,0.071923,2.3657,1.  
2474,1.2274,1.2303,1.2253,1.2012,1.2428,0.068885,0.071612,0.072258,0.0  
74936,0.075015,0.072649,0.070041,0.071794,0.074243,0.070785,0.071737,0  
.071014,0.070754,0.073852,0.072405,2.3911,2.3714,1.2325,1.3936,0.98199  
,1.2308,1.2295,1.2101,1.1796,1.2022,0.070461,0.072689,0.07248,0.070577  
,0.073426,0.073317,0.070598,0.069994,0.072029,0.07359,0.070157,0.07033  
9,0.070419,0.070368,0.072169,2.3648,2.3683,2.3745,0.67283,1.6324,1.238  
6,1.2419,1.2438,1.1287,1.48,1.2964,1.2231,0.075623,0.070639,0.072134,0  
.069276,0.074922,0.072002,0.071349,0.071657,0.072779,0.073389,0.072652  
,0.072419,0.072138,0.069914,0.068843,0.069633,2.3923,2.3701,2.3827,2.3  
855,1.2391,1.2319,0.8379,1.2367,1.0103,1.2128,1.1031,1.3219,1.2391,1.4  
35,0.07203,0.072976,0.071132,0.074421,0.06995,0.073495,0.070738,0.0726  
72,0.07065,0.070804,0.072662,0.072104,0.072094,0.073527,0.06938,0.0685  
45,2.3678,2.3695,2.3994,2.4156,2.3658,2.3628,1.1188,1.4434,1.118,1.139  
9,1.192,1.294,1.1767,1.2323,1.2052,1.1424,0.075204,0.072301,0.072184,0  
.072018,0.06808,0.069208,0.072787,0.071157,0.072767,0.071867,0.073014,  
0.069756,0.073077,0.070733,0.073593,0.068414,0.071173,2.3816,2.3788,2.  
3471,2.4022,2.3838,2.4004,1.174,1.0368,1.2056,1.3673,1.3648,1.3343,1.2  
19,1.2242,1.1914,1.2186,1.2655,0.070497,0.07044,0.071217,0.070228,0.07  
02,0.068864,0.069439,0.07301,0.070956,0.073836,0.070971,0.069606,0.068  
981,0.092943,0.098858,0.09225,0.073338,2.3607,2.3822,2.3851,2.3821,2.3  
72,2.3877,2.3933,1.3696,1.2283,1.2618,1.223,1.3602,1.3113,1.1775,1.224  
7,1.2549,1.345,1.1535,0.073182,0.074141,0.070127,0.069152,0.072463,0.0  
71945,0.072312,0.072852,0.069075,0.070995,0.069238,0.099596,0.09478,0.  
094954,0.094482,0.094449,0.09397,0.071445,2.3589,2.4108,2.4147,2.3916,  
2.3889,2.3878,2.3914,1.294,1.34,1.1405,1.2863,1.2378,1.21,1.2141,1.212  
2,1.2988,1.2268,0.99151,0.069753,0.073321,0.070946,0.071659,0.069582,0  
.074933,0.073768,0.070771,0.074292,0.094376,0.094369,0.09059,0.097288,  
0.095722,0.094535,0.097437,0.094173,0.095878,0.073523,2.3889,2.4005,2.  
3954,2.4009,2.3715,2.3636,2.3722,1.0152,1.1878,1.1715,1.226,1.1771,1.2  
245,1.228,0.96268,1.232,1.1803,1.2007,0.90064,0.069813,0.070618,0.0731

69,0.075872,0.070646,0.073033,0.097329,0.094321,0.094031,0.09532,0.088  
553,0.093708,0.099469,0.096581,0.095736,0.0892,0.09612,0.095886,2.3817  
,2.3832,2.3734,2.3944,2.3608,2.3991,2.3949,1.0132,1.2276,1.2412,1.2226  
,1.2459,1.278,1.394,1.2419,1.2942,1.2252,1.222,1.2204,0.074407,0.07346  
6,0.07265,0.098017,0.091732,0.098243,0.099464,0.096791,0.094289,0.0954  
83,0.094844,0.095837,0.094389,0.095065,0.088966,0.092622,0.090537,0.09  
414,2.3995,2.3875,2.4055,2.3963,2.3682,2.413,2.4141,2.389,2.3893,1.234  
9,1.2247,0.98823,1.2744,0.9381,1.1359,1.1174,1.2307,1.2194,1.4501,1.27  
18,0.097481,0.095774,0.096425,0.095729,0.095992,0.094179,0.099156,0.09  
7189,0.094205,0.094981,0.098911,0.096301,0.093966,0.09412,0.095504,0.1  
0049,0.098276,0.094703,2.3817,2.4193,2.3745,2.3632,2.3979,2.3921,2.397  
3,2.3738,2.3583,1.3286,1.1469,1.0129,0.67106,0.87751,0.87309,0.90241,0  
.88265,1.0314,0.84751,0.87898,0.092601,0.091858,0.097249,0.10108,0.094  
029,0.088307,0.094023,0.094933,0.095,0.1001,0.096572,0.096796,0.094688  
,0.094207,0.095054,0.09527,0.094803,0.096179,2.3638,2.3786,2.3828,2.39  
86,2.3953,2.3645,2.3762,2.3649,2.3986,1.1416,0.86744,0.92796,0.93765,0  
.77477,0.95735,0.78815,1.0624,0.93993,0.8653,0.60273,0.09474,0.092899,  
0.091931,0.09367,0.096933,0.090311,0.09032,0.095903,0.091974,0.096318,  
0.095252,0.094152,0.09115,0.097793,0.10111,0.096036,0.099098,0.094641,  
2.3816,2.3544,2.4005,2.3839,2.3995,2.3794,2.367,1.2583,1.3734,1.542,0.  
85864,0.88409,0.83036,0.87218,0.76312,0.97921,0.84176,0.87275,0.84273,  
0.90544,0.0961,0.094992,0.091831,0.098058,0.096085,0.095394,0.092997,0  
.089512,0.097156,0.095835,0.097597,0.095499,0.095307,0.094664,0.096123  
,0.099242,0.094639,0.092878,2.4004,2.3564,2.4106,2.387,2.3949,2.3754,1  
.3149,1.2784,1.2673,1.2066,1.2333,1.0602,0.87388,0.85176,0.91372,0.918  
66,0.87297,0.90108,0.88153,0.95518,0.095018,0.096212,0.095921,0.095442  
,0.097069,0.094266,0.097388,0.09542,0.094594,0.093179,0.090859,0.09526  
9,0.095634,0.098423,0.093198,0.094089,0.09969,0.09464,2.3554,2.374,2.4  
193,2.373,2.3735,1.3733,1.263,1.2351,1.3245,1.1202,0.89817,0.81241,0.9  
211,0.92083,0.90126,0.99683,0.86104,0.94893,0.8623,0.91425,0.091925,0.  
097976,0.09176,0.094736,0.10049,0.095454,0.098428,0.092625,0.1,0.09573  
6,0.099269,0.096414,0.095745,0.095994,0.093061,0.094921,0.097799,0.095  
14,2.3937,2.3813,2.3953,1.2442,1.2539,1.2573,1.3344,1.2609,1.4393,1.14  
61,1.3201,0.99653,0.8869,0.91076,0.95404,0.68556,0.86792,1.0185,0.7176  
,0.77844,0.097478,0.096519,0.097983,0.094414,0.097856,0.0939,0.090324,  
0.092385,0.096441,0.099455,0.093551,0.097331,0.092736,0.090702,0.09779  
3,0.094573,0.095349,0.094534,2.3769,1.2986,1.4876,1.2432,1.1292,1.2616  
,1.1943,1.254,1.2579,1.2345,0.85634,0.85683,0.96579,0.84754,0.91564,0.  
90995,0.87668,0.86815,0.85603,0.094396,0.097096,0.095618,0.094604,0.09  
7895,0.096876,0.097756,0.095141,0.093804,0.093745,0.096016,0.094837,0.  
096803,0.093103,0.088224,0.097551,0.097806,0.12,1.2429,1.2729,1.2607,1  
.1896,1.2668,1.0167,1.1557,1.4254,1.2512,1.579,0.97267,0.57316,0.62018  
,0.86266,0.85959,0.77392,0.88648,0.71142,0.93736,0.096457,0.096352,0.0  
92771,0.096864,0.095373,0.10578,0.096331,0.099757,0.092454,0.096312,0.  
093667,0.096437,0.094226,0.095248,0.09606,0.09502,0.094778,0.11828,1.4  
379,1.2357,1.2471,1.4095,1.2744,1.0997,1.1571,0.98846,1.0117,1.2955,0.  
73733,1.0478,0.50655,0.98382,0.86295,0.92251,0.91164,0.99148,0.095341,  
0.096202,0.096857,0.095401,0.096868,0.098336,0.090041,0.093836,0.09537  
9,0.095809,0.092861,0.095794,0.09622,0.094694,0.097181,0.095314,0.0968  
24,0.095941,0.12013,1.2455,1.5568,1.2084,1.2462,1.2871,1.1839,1.1527,1  
.3258,1.1359,1.2589,0.88136,0.81547,0.76173,0.82864,0.91974,0.98637,1.  
0189,0.74937,0.091115,0.094869,0.094637,0.094948,0.093699,0.087981,0.0

96588,0.093285,0.094504,0.09344,0.093828,0.097537,0.09968,0.097158,0.0  
99014,0.096364,0.092326,0.11802,0.11964,0.11828,1.2287,1.2023,1.2384,1  
.2533,1.3029,1.2556,1.1855,1.237,1.2443,0.68235,0.77432,0.86046,0.7985  
5,0.91001,0.90387,0.10081,0.09642,0.093992,0.095004,0.095652,0.096128,  
0.097337,0.09246,0.099219,0.093648,0.09568,0.098935,0.094607,0.096202,  
0.098433,0.097368,0.096521,0.094103,0.12054,0.11838,0.11691,0.11866,0.  
83354,1.2345,1.0788,0.91635,1.2409,1.2437,1.3837,1.4351,1.3874,0.99527  
,0.71286,0.82688,0.091159,0.097696,0.10179,0.097997,0.090676,0.091572,  
0.089619,0.09895,0.095337,0.095951,0.090618,0.091311,0.095085,0.089255  
,0.094387,0.094104,0.094024,0.091987,0.10001,0.096341,0.11835,0.12056,  
0.11964,0.11907,0.11815,0.12007,1.3189,1.2474,1.4931,1.2525,1.1424,1.2  
747,1.1719,1.2938,0.097992,0.10067,0.10567,0.095203,0.095114,0.097143,  
0.092912,0.093281,0.10312,0.09517,0.091356,0.084562,0.0947,0.095404,0.  
08818,0.094738,0.095894,0.10437,0.094548,0.097962,0.096987,0.096882,0.  
093529,0.11792,0.1192,0.11827,0.11818,0.11795,0.12124,1.3223,1.2484,1.  
4026,1.2649,1.3163,0.11886,0.11835,0.096122,0.095667,0.096681,0.095653  
,0.095213,0.095811,0.097225,0.093973,0.094893,0.097451,0.095256,0.0973  
85,0.093016,0.096274,0.098596,0.094283,0.094472,0.098222,0.095459,0.09  
3689,0.094654,0.12013,0.11917,0.11797,0.12205,0.11956,0.11851,0.12077,  
0.1219,0.11651,0.1182,1.2296,1.1109,0.12047,0.12028,0.11815,0.12015,0.  
092359,0.10192,0.095817,0.094164,0.094694,0.091724,0.09428,0.095652,0.  
09417,0.097536,0.098509,0.091216,0.092443,0.095345,0.093011,0.094764,0  
.099376,0.093618,0.093446,0.11863,0.12036,0.12114,0.11984,0.11879,0.11  
833,0.11639,0.11878,0.11782,0.11826,0.11785,0.12036,0.12136,0.11903,0.  
11974,0.11695,0.11963,0.096472,0.094109,0.098295,0.10261,0.094948,0.09  
6657,0.09468,0.10212,0.098141,0.094679,0.098085,0.095468,0.097694,0.09  
5962,0.091231,0.094667,0.12113,0.11861,0.12004,0.12017,0.11967,0.11946  
,0.11822,0.12212,0.12175,0.11967,0.11847,0.11917,0.12043,0.1184,0.1222  
5,0.11789,0.11837,0.11896,0.1201,0.096729,0.097468,0.089455,0.093666,0  
.099713,0.0945,0.095207,0.092658,0.098135,0.093884,0.095406,0.092729,0  
.10001,0.11948,0.11956,0.11837,0.11884,0.11886,0.11863,0.11977,0.1208,  
0.11898,0.11975,0.11987,0.12087,0.1185,0.11836,0.12103,0.1186,0.11978,  
0.11834,0.11976,0.12117,0.12028,0.096285,0.095247,0.094113,0.096712,0.  
092224,0.098927,0.096356,0.095267,0.093262,0.11831,0.12167,0.11888,0.1  
1915,0.12166,0.11877,0.12016,0.11795,0.11991,0.12097,0.12142,0.11909,0  
.11856,0.11923,0.11755,0.12117,0.11987,0.11826,0.11953,0.11937,0.11977  
,0.11891,0.12051,0.11957,0.11941,0.097094,0.092824,0.094804,0.099526,0  
.11795,0.11817,0.12017,0.12042,0.11678,0.11636,0.11892,0.11846,0.11957  
,0.11953,0.12018,0.11877,0.12133,0.11997,0.12023,0.12185,0.11818,0.120  
85,0.11651,0.11825,0.12013,0.11721,0.12042,0.11987,0.11979,0.12111,0.1  
2112,0.1214,0.1174,0.11908,0.11806,0.11918,0.1205,0.12283,0.12003,0.11  
787,0.12114,0.11827,0.11764,0.11811,0.11945,0.12107,0.11866,0.11994,0.  
11787,0.12167,0.11781,0.11922,0.12008,0.12033,0.1178,0.12015,0.11818,0  
.11869,0.11944,0.12005,0.11969,0.11939,0.11937,0.1188,0.11885,0.11777,  
0.12011,0.11794,0.12112,0.12085,0.11932,0.11878,0.11999,0.12069,0.1215  
2,0.12106,0.11855,0.11984,0.11816,0.11866,0.12049,0.11923,0.11971,0.11  
947,0.1179,0.11959,0.12071,0.11616,0.11881,0.11883,0.11779,0.11832,0.1  
198,0.11849,0.11775,0.1181,0.11912,0.12008,0.12102,0.11875,0.11885,0.1  
1952,0.11792,0.11913,0.11904,0.12269,0.11881,0.11909,0.11831,0.11988,0  
.12061,0.11748,0.11785,0.11873,0.12032,0.12022,0.11819,0.12103,0.11974  
,0.11903,0.11942,0.11914,0.121,0.11754,0.11859,0.11938,0.12061,0.11995  
,0.11952,0.12095,0.12014,0.1214,0.12,0.11929,0.11717,0.11913,0.11896,0

.11933,0.11803,0.11737,0.11912,0.12008,0.1211,0.11866,0.11724,0.12023,  
0.11981,0.12052,0.11955,0.122,0.12312,0.11981,0.12021,0.12143,0.11855,  
0.11834,0.12094,0.11834,0.11875,0.12212,0.11825,0.12044,0.11891,0.1190  
5,0.11905,0.11955,0.12025,0.11806,0.12045,0.12146,0.11866,0.12023,0.12  
071,0.11979,0.1207,0.1178,0.11881,0.11998,0.11887,0.12004,0.11788,0.11  
772,0.11846,0.11852,0.11801,0.11726,0.1195,0.11891,0.11825,0.11871,0.1  
1638,0.12112,0.12064,0.11964,0.12135,0.12065,0.11943,0.12073,0.12229  
0.11749,0.11624,0.11487,0.11878,0.11632,0.11348,0.11449,0.11521,0.1181  
1,0.11478,0.11751,0.11887,0.11459,0.11391,0.11654,0.11574,0.11458,0.11  
638,0.11781,0.11629,0.98829,0.82679,1.1226,0.8597,0.11504,0.11706,0.11  
952,0.1148,0.11684,0.11707,0.11387,0.11599,0.11404,0.1156,0.11749,0.11  
283,0.11317,0.11344,0.11431,1.5762,0.87378,0.85968,0.85816,0.8572,0.84  
166,0.8742,0.1134,0.11401,0.11743,0.11956,0.11863,0.11768,0.114,0.1161  
6,0.11897,0.11496,0.11644,0.11643,0.11478,0.11791,0.11567,1.5968,1.583  
2,0.85697,0.96567,0.69747,0.85658,0.85535,0.84273,0.8257,0.83565,0.115  
75,0.11731,0.11671,0.1162,0.11782,0.11726,0.11547,0.11327,0.11584,0.11  
86,0.1142,0.11622,0.11491,0.11447,0.11749,1.5911,1.5809,1.5777,0.49866  
,1.1077,0.86836,0.86909,0.86808,0.7948,1.0223,0.89708,0.85601,0.11892,  
0.11536,0.11619,0.11428,0.11909,0.11557,0.11566,0.11541,0.11772,0.1180  
8,0.11708,0.11597,0.11741,0.11385,0.11237,0.11417,1.595,1.5937,1.5973,  
1.5873,0.87009,0.86093,0.60966,0.86619,0.71979,0.83766,0.78332,0.91057  
,0.86957,0.99035,0.1163,0.11781,0.11574,0.11863,0.11387,0.11867,0.1144  
4,0.11678,0.11447,0.11492,0.11579,0.11568,0.116,0.11832,0.11424,0.1128  
9,1.5801,1.5909,1.612,1.6305,1.5836,1.5683,0.79141,0.98674,0.78552,0.8  
0475,0.83981,0.90043,0.81971,0.86327,0.83977,0.80713,0.11831,0.11647,0  
.11633,0.11774,0.11132,0.11418,0.11678,0.11621,0.11775,0.11786,0.11617  
,0.11522,0.11883,0.11516,0.11782,0.11266,0.11644,1.5902,1.5939,1.5676,  
1.612,1.5921,1.6194,0.82722,0.73539,0.84328,0.9427,0.95431,0.92813,0.8  
4642,0.85143,0.83244,0.84221,0.87568,0.11456,0.11398,0.11529,0.11505,0  
.11458,0.11438,0.11245,0.11741,0.11454,0.11912,0.11454,0.11323,0.11406  
,0.12922,0.13208,0.12875,0.11813,1.5801,1.6026,1.5902,1.5857,1.5907,1.  
5903,1.5873,0.94181,0.84901,0.88177,0.85261,0.94782,0.90239,0.81762,0.  
86042,0.87499,0.93492,0.81225,0.11736,0.11881,0.11548,0.11265,0.11557,  
0.11698,0.11668,0.11767,0.11315,0.11545,0.11473,0.13345,0.12957,0.1301  
8,0.1308,0.12992,0.1292,0.11763,1.5625,1.6079,1.6163,1.5965,1.6014,1.6  
161,1.6013,0.89566,0.92706,0.79269,0.89487,0.86515,0.84224,0.84875,0.8  
4415,0.90692,0.8599,0.69915,0.11414,0.11655,0.11525,0.11599,0.11428,0.  
12001,0.11906,0.11546,0.11772,0.12946,0.12922,0.12718,0.13164,0.13059,  
0.12991,0.13234,0.13047,0.13117,0.11791,1.6005,1.6098,1.623,1.6047,1.5  
728,1.579,1.5816,0.71747,0.83077,0.82372,0.85614,0.82807,0.85752,0.856  
12,0.68432,0.86235,0.82815,0.83474,0.64636,0.11372,0.11639,0.11886,0.1  
1935,0.11493,0.11904,0.13179,0.13012,0.12936,0.13109,0.12614,0.12956,0  
.13432,0.13127,0.13108,0.12742,0.13111,0.13113,1.5973,1.5892,1.5915,1.  
6003,1.5898,1.6104,1.609,0.71615,0.85576,0.8656,0.84874,0.87492,0.8842  
8,0.96866,0.87072,0.89748,0.85319,0.85083,0.84511,0.11977,0.11642,0.11  
719,0.13293,0.12936,0.13275,0.13288,0.1329,0.13008,0.13087,0.13018,0.1  
3154,0.13055,0.12987,0.12615,0.12796,0.12843,0.12928,1.6051,1.6118,1.6  
187,1.6138,1.5859,1.6281,1.6215,1.5909,1.5845,0.86526,0.85764,0.70273,  
0.88831,0.67697,0.80202,0.78607,0.85724,0.8543,0.99769,0.88718,0.13264  
,0.13114,0.13133,0.13098,0.1315,0.12911,0.13432,0.1334,0.13011,0.12979  
,0.13288,0.13249,0.12875,0.12991,0.13089,0.13395,0.13276,0.13102,1.582  
1,1.6195,1.5909,1.5701,1.621,1.6016,1.6096,1.5825,1.5666,0.92092,0.805

98,0.72231,0.49812,0.63584,0.63258,0.6494,0.62922,0.7323,0.60821,0.636  
11,0.12791,0.12858,0.13193,0.13424,0.12986,0.1266,0.13037,0.12999,0.13  
081,0.13284,0.1314,0.1319,0.13004,0.12915,0.13123,0.12992,0.13072,0.13  
121,1.5827,1.5875,1.5911,1.6078,1.6134,1.5674,1.5945,1.5786,1.6215,0.7  
9684,0.62424,0.65962,0.66752,0.56664,0.68154,0.57783,0.75346,0.67353,0  
.62748,0.45671,0.12941,0.12867,0.1285,0.12937,0.13229,0.12727,0.12764,  
0.13219,0.12863,0.13168,0.13014,0.13004,0.12806,0.13258,0.1345,0.13072  
,0.13387,0.13039,1.5853,1.5593,1.6076,1.6079,1.6086,1.5944,1.5694,0.87  
868,0.95325,1.053,0.62166,0.63826,0.60014,0.63343,0.56001,0.69626,0.60  
982,0.62657,0.60716,0.64856,0.13141,0.13037,0.12814,0.13203,0.13127,0.  
13062,0.12961,0.12676,0.13177,0.13143,0.13256,0.13151,0.13025,0.12952,  
0.13052,0.13372,0.12901,0.12991,1.6,1.5727,1.6082,1.6047,1.6166,1.584,  
0.91984,0.88757,0.88511,0.83669,0.85236,0.74323,0.63221,0.61061,0.6548  
6,0.65935,0.63109,0.64352,0.63569,0.68304,0.13146,0.13115,0.13162,0.13  
105,0.13213,0.12938,0.13252,0.13089,0.13051,0.12893,0.12835,0.13044,0.  
1305,0.13235,0.12957,0.12987,0.13323,0.12934,1.5735,1.5868,1.6181,1.58  
39,1.5753,0.94474,0.88524,0.86241,0.91238,0.78878,0.64125,0.58368,0.65  
773,0.65446,0.64897,0.70938,0.61793,0.67056,0.6225,0.65139,0.12903,0.1  
3184,0.12799,0.13069,0.13254,0.13103,0.13309,0.12909,0.13347,0.13111,0  
.1333,0.1319,0.13151,0.13131,0.12853,0.13116,0.13156,0.13051,1.599,1.5  
896,1.6041,0.86607,0.86889,0.88209,0.92435,0.87844,0.99184,0.80432,0.9  
2332,0.70645,0.63199,0.65277,0.67622,0.50746,0.62566,0.72761,0.52936,0  
.57138,0.13217,0.13123,0.13256,0.13014,0.13183,0.13017,0.12711,0.12838  
,0.13159,0.13297,0.1293,0.13251,0.12864,0.12757,0.13139,0.12925,0.1308  
9,0.1301,1.6079,0.90113,1.0134,0.86504,0.79413,0.88106,0.83692,0.87523  
,0.87568,0.86548,0.61242,0.6163,0.6876,0.61146,0.65908,0.6514,0.63065,  
0.62428,0.61929,0.13033,0.1317,0.13085,0.1292,0.13284,0.13088,0.13286,  
0.13028,0.12934,0.12914,0.13107,0.12981,0.13139,0.12937,0.12631,0.1325  
5,0.13124,0.14623,0.86489,0.89657,0.88345,0.83736,0.88271,0.72833,0.80  
442,0.98552,0.87726,1.0842,0.69166,0.43596,0.46827,0.62547,0.61979,0.5  
6367,0.63085,0.5262,0.66905,0.13099,0.13086,0.12854,0.13131,0.13057,0.  
13779,0.13106,0.13283,0.12899,0.13137,0.13012,0.13093,0.12931,0.13046,  
0.13185,0.13076,0.12959,0.14431,0.99069,0.85151,0.87503,0.97119,0.8928  
5,0.77823,0.81635,0.70308,0.72332,0.90055,0.53702,0.74218,0.39453,0.70  
174,0.62016,0.6586,0.65732,0.70299,0.12999,0.13152,0.13174,0.1311,0.13  
192,0.13265,0.12826,0.12869,0.1308,0.13079,0.12829,0.13086,0.13078,0.1  
2974,0.13105,0.12995,0.13127,0.13181,0.14616,0.87525,1.0704,0.83658,0.  
86984,0.89668,0.82953,0.80788,0.91186,0.7879,0.87963,0.63911,0.59528,0  
.55823,0.60522,0.65897,0.69426,0.72222,0.54482,0.12832,0.13011,0.1303,  
0.13111,0.12892,0.12619,0.13122,0.12864,0.13026,0.12976,0.12941,0.1325  
2,0.13315,0.13192,0.13326,0.13225,0.12852,0.14409,0.14562,0.14376,0.86  
127,0.84104,0.8556,0.87267,0.9022,0.8708,0.83472,0.85649,0.86434,0.507  
82,0.56737,0.62359,0.57642,0.65254,0.65016,0.13401,0.13145,0.1286,0.13  
066,0.13123,0.13115,0.13244,0.12887,0.13237,0.12977,0.13078,0.13305,0.  
13004,0.13201,0.13337,0.13151,0.1321,0.12948,0.14598,0.14495,0.14226,0  
.14536,0.60385,0.85866,0.76198,0.66147,0.86444,0.86536,0.96284,0.99314  
,0.9634,0.70476,0.52238,0.59937,0.1289,0.13183,0.13469,0.13259,0.12773  
,0.12873,0.12612,0.13288,0.13175,0.13204,0.12773,0.12787,0.13094,0.125  
91,0.12955,0.12963,0.12933,0.12825,0.13339,0.13219,0.1447,0.14577,0.14  
646,0.14504,0.14542,0.14588,0.90443,0.86894,1.0263,0.87079,0.79818,0.8  
8512,0.81965,0.89353,0.13252,0.13344,0.13718,0.13054,0.1309,0.1315,0.1  
2862,0.12973,0.13557,0.13039,0.1281,0.12396,0.13031,0.13041,0.12705,0.



13062,0.13078,0.13589,0.13008,0.13314,0.13145,0.13119,0.1291,0.14307,0  
.14535,0.14435,0.14505,0.14351,0.14678,0.90951,0.87649,0.97105,0.87823  
,0.90761,0.14472,0.14391,0.13197,0.13092,0.1317,0.13047,0.13022,0.1310  
1,0.13217,0.12918,0.12998,0.13192,0.13007,0.13228,0.12936,0.1315,0.132  
75,0.12957,0.12984,0.1331,0.13074,0.12921,0.13037,0.1457,0.14567,0.144  
08,0.14773,0.14585,0.14521,0.14631,0.14796,0.14347,0.14409,0.85137,0.7  
8108,0.14563,0.14648,0.14398,0.14568,0.12879,0.13516,0.13103,0.12942,0  
.13046,0.12799,0.13027,0.13063,0.12938,0.13346,0.13243,0.12814,0.12897  
,0.13053,0.12872,0.12982,0.13335,0.12971,0.12929,0.14466,0.14581,0.146  
62,0.14572,0.14521,0.14417,0.14299,0.14526,0.1445,0.1441,0.14428,0.146  
64,0.14777,0.14582,0.14638,0.14311,0.14584,0.13114,0.13009,0.13249,0.1  
3604,0.13018,0.13128,0.13059,0.13578,0.13298,0.13007,0.13284,0.13086,0  
.13192,0.13057,0.12817,0.12981,0.14709,0.14444,0.14572,0.1464,0.14534,  
0.14589,0.14426,0.14832,0.14734,0.14646,0.14444,0.14482,0.14697,0.1451  
,0.14868,0.14383,0.14535,0.14448,0.14695,0.13046,0.13155,0.12743,0.129  
26,0.13409,0.12996,0.13,0.12885,0.13233,0.12976,0.13034,0.12891,0.1337  
6,0.14593,0.145,0.14438,0.14449,0.14518,0.14552,0.14625,0.14682,0.1446  
1,0.14606,0.14711,0.14711,0.14462,0.14456,0.1467,0.14435,0.14683,0.144  
9,0.14513,0.14629,0.14664,0.13111,0.12958,0.12981,0.13285,0.12836,0.13  
255,0.13022,0.13121,0.12834,0.14414,0.14734,0.14499,0.14599,0.1468,0.1  
4547,0.14583,0.14413,0.14592,0.14636,0.14675,0.14461,0.14425,0.1447,0.  
14278,0.14665,0.14611,0.14464,0.14623,0.14587,0.14605,0.14571,0.14564,  
0.14531,0.14542,0.13204,0.12915,0.12947,0.13321,0.14465,0.14413,0.1452  
8,0.14675,0.1425,0.14233,0.14532,0.1438,0.14609,0.14675,0.14577,0.1447  
4,0.14757,0.14488,0.14621,0.14654,0.14319,0.146,0.14221,0.14394,0.1459  
6,0.14363,0.14609,0.14579,0.14693,0.14753,0.14807,0.14757,0.14402,0.14  
59,0.1446,0.14499,0.1471,0.14829,0.14544,0.14386,0.14749,0.1439,0.1442  
4,0.14475,0.1467,0.14723,0.14565,0.14644,0.14411,0.14753,0.14422,0.145  
85,0.14651,0.14699,0.14416,0.14585,0.14429,0.14454,0.14502,0.14512,0.1  
4549,0.14474,0.14553,0.1447,0.14486,0.14361,0.14728,0.14385,0.14641,0.  
14638,0.14534,0.1452,0.14603,0.14668,0.14711,0.14687,0.14385,0.14569,0  
.14396,0.14422,0.147,0.14636,0.14599,0.14492,0.14353,0.14595,0.14638,0  
.14254,0.14575,0.14491,0.14442,0.14368,0.14645,0.14416,0.1434,0.14377,  
0.14554,0.14578,0.14716,0.14559,0.14507,0.14519,0.14398,0.14581,0.1451  
9,0.14869,0.14535,0.14559,0.14474,0.14557,0.14654,0.14338,0.14452,0.14  
393,0.14655,0.14606,0.14419,0.14583,0.14596,0.1456,0.14565,0.14576,0.1  
4601,0.14328,0.14479,0.14561,0.14688,0.14568,0.14571,0.14653,0.14588,0  
.14767,0.1463,0.14524,0.14333,0.1458,0.14447,0.14531,0.14502,0.14449,0  
.1453,0.14569,0.14717,0.14454,0.14336,0.14586,0.14602,0.14636,0.1455,0  
.1475,0.14851,0.14714,0.14586,0.14715,0.14642,0.14463,0.14672,0.14523,  
0.14465,0.14855,0.14486,0.14579,0.14361,0.14556,0.14441,0.1458,0.14794  
,0.1444,0.14649,0.14697,0.14522,0.14532,0.14756,0.14558,0.14594,0.1436  
9,0.14486,0.14631,0.14527,0.14687,0.14294,0.14489,0.14541,0.14573,0.14  
41,0.14333,0.14502,0.14557,0.14547,0.14439,0.14244,0.14752,0.14722,0.1  
4511,0.1472,0.14595,0.14497,0.14653,0.14832  
0.14475,0.14495,0.14198,0.147,0.14553,0.14306,0.14242,0.14308,0.14559,  
0.14522,0.14538,0.14648,0.14237,0.14179,0.14513,0.14382,0.14269,0.1439  
3,0.14551,0.14389,0.72687,0.6088,0.81082,0.62373,0.14321,0.14652,0.145  
67,0.14216,0.14481,0.14482,0.14128,0.14343,0.14156,0.14265,0.14565,0.1  
4018,0.14135,0.14173,0.14232,1.0904,0.64177,0.63224,0.62983,0.62681,0.  
62783,0.64286,0.14086,0.14142,0.14496,0.14755,0.14635,0.14439,0.14245,  
0.14345,0.1447,0.14401,0.14376,0.14512,0.14299,0.14522,0.14433,1.1357,

1.1055,0.6274,0.71018,0.52834,0.63918,0.6345,0.62415,0.60785,0.60428,0  
.14356,0.14562,0.14515,0.1437,0.14543,0.14477,0.14426,0.14234,0.14489,  
0.14747,0.14177,0.14373,0.14466,0.14359,0.14444,1.1038,1.0885,1.1043,0  
.39303,0.80197,0.64205,0.64903,0.6425,0.59118,0.74337,0.65256,0.62748,  
0.14705,0.14263,0.14498,0.14266,0.14671,0.1429,0.1436,0.14264,0.14564,  
0.146,0.14575,0.14454,0.1453,0.14271,0.14122,0.14116,1.1219,1.1235,1.1  
117,1.1044,0.63943,0.6393,0.4709,0.6375,0.54288,0.61544,0.58493,0.6611  
2,0.64579,0.71716,0.1431,0.14606,0.14433,0.14616,0.14214,0.14622,0.143  
36,0.14546,0.14349,0.14244,0.14368,0.14279,0.1439,0.14584,0.14139,0.14  
143,1.0978,1.1102,1.1319,1.1445,1.1008,1.0958,0.59331,0.70992,0.58651,  
0.60005,0.62426,0.66088,0.59891,0.63956,0.61949,0.59802,0.14646,0.1439  
9,0.14465,0.14467,0.14001,0.14217,0.1457,0.14338,0.14581,0.14598,0.143  
76,0.14317,0.14781,0.14244,0.14506,0.14235,0.14514,1.1025,1.1257,1.092  
8,1.148,1.1135,1.141,0.61428,0.55523,0.62309,0.6887,0.70447,0.68324,0.  
62194,0.61941,0.61497,0.61671,0.63692,0.14333,0.14205,0.14344,0.14189,  
0.1418,0.14199,0.13963,0.14584,0.14211,0.14615,0.14392,0.13986,0.14234  
,0.14006,0.13848,0.13875,0.1469,1.1032,1.1274,1.117,1.1104,1.1205,1.12  
03,1.1136,0.6946,0.62113,0.65247,0.62487,0.69049,0.6592,0.60364,0.6337  
,0.64611,0.67878,0.60109,0.14516,0.14626,0.14309,0.14065,0.14413,0.146  
47,0.14463,0.14543,0.14135,0.14262,0.14255,0.13792,0.13867,0.13983,0.1  
3985,0.13905,0.13942,0.14563,1.0844,1.1261,1.1407,1.128,1.124,1.1305,1  
.1165,0.65579,0.68613,0.5896,0.6582,0.63354,0.61411,0.62409,0.62151,0.  
66405,0.63149,0.52771,0.14129,0.14323,0.14347,0.14407,0.14271,0.14737,  
0.14539,0.14252,0.14684,0.13898,0.13914,0.14009,0.14032,0.13972,0.1394  
,0.14134,0.14078,0.14005,0.14585,1.1265,1.1183,1.135,1.1404,1.0997,1.0  
925,1.109,0.53922,0.61894,0.6095,0.63284,0.61871,0.63307,0.6341,0.5187  
2,0.63189,0.61498,0.61511,0.48972,0.14158,0.14517,0.14687,0.14772,0.14  
245,0.14676,0.13886,0.13997,0.14037,0.13973,0.14001,0.13952,0.14138,0.  
14055,0.14065,0.14091,0.1411,0.14017,1.1145,1.1246,1.1085,1.1255,1.111  
7,1.1287,1.1294,0.5385,0.63262,0.6413,0.63358,0.65424,0.64587,0.70997,  
0.63696,0.66017,0.63509,0.63035,0.61918,0.14931,0.14368,0.14476,0.1407  
8,0.14241,0.13958,0.13914,0.14237,0.13896,0.13971,0.13954,0.14162,0.14  
053,0.13982,0.13877,0.13849,0.14333,0.13901,1.1214,1.1228,1.1445,1.141  
9,1.1109,1.1299,1.1339,1.1195,1.1101,0.63708,0.62766,0.53273,0.64909,0  
.5174,0.5958,0.58517,0.63141,0.62363,0.72009,0.65279,0.14222,0.14022,0  
.13999,0.13946,0.14033,0.13894,0.14154,0.14226,0.14158,0.1385,0.13908,  
0.14068,0.13834,0.13944,0.13982,0.13901,0.1402,0.14159,1.116,1.1385,1.  
113,1.0941,1.1432,1.1297,1.1202,1.1009,1.1048,0.67144,0.59709,0.53974,  
0.3839,0.47874,0.4765,0.48416,0.47287,0.54309,0.45536,0.47153,0.13908,  
0.14125,0.13917,0.13919,0.13865,0.14033,0.14045,0.13932,0.14131,0.1374  
5,0.1401,0.14106,0.13915,0.13924,0.14122,0.13894,0.13985,0.13992,1.110  
8,1.1199,1.1037,1.1281,1.1254,1.0824,1.1299,1.0965,1.145,0.5778,0.4644  
7,0.49089,0.50369,0.43062,0.51035,0.43746,0.55639,0.50615,0.4727,0.357  
04,0.1385,0.1388,0.14071,0.13811,0.14088,0.13979,0.14157,0.14082,0.142  
16,0.14119,0.13931,0.14131,0.14038,0.13948,0.14073,0.13986,0.14152,0.1  
3995,1.0981,1.0822,1.1249,1.1251,1.1389,1.1073,1.0969,0.64016,0.68295,  
0.74231,0.46508,0.47985,0.45539,0.47523,0.42793,0.51558,0.46398,0.4761  
7,0.46057,0.48568,0.1409,0.13929,0.1394,0.13948,0.14026,0.13837,0.1393  
3,0.1407,0.14093,0.14112,0.13964,0.14128,0.13877,0.13852,0.13743,0.140  
83,0.13828,0.14209,1.1158,1.0959,1.1253,1.1193,1.1466,1.1173,0.66205,0  
.64372,0.64298,0.60168,0.60802,0.54148,0.47517,0.45466,0.48845,0.49554  
,0.47852,0.48809,0.47529,0.51527,0.14017,0.14032,0.14048,0.14005,0.139

13,0.13838,0.1407,0.1402,0.14066,0.13952,0.14206,0.13986,0.13957,0.1398,0.14227,0.14002,0.13933,0.13901,1.0826,1.1088,1.1258,1.1007,1.0947,0.6778,0.64504,0.61444,0.6562,0.57566,0.47011,0.43878,0.49107,0.48716,0.48719,0.52664,0.46356,0.49514,0.47253,0.48459,0.14155,0.13814,0.13999,0.13921,0.13789,0.14031,0.14079,0.1415,0.13989,0.13997,0.14046,0.14122,0.14129,0.14116,0.13898,0.14256,0.13914,0.14041,1.121,1.117,1.1421,0.62316,0.62369,0.63747,0.66676,0.631,0.70553,0.58076,0.66967,0.5301,0.47318,0.48614,0.50173,0.39225,0.47125,0.53641,0.4055,0.43525,0.14037,0.14034,0.13913,0.13946,0.13862,0.14051,0.13946,0.13752,0.14043,0.13951,0.13922,0.14204,0.13821,0.13996,0.13913,0.13871,0.13909,0.13968,1.1383,0.64756,0.71661,0.61145,0.57548,0.63773,0.60264,0.63193,0.62524,0.62139,0.4635,0.46537,0.51344,0.45679,0.50057,0.48208,0.48144,0.46618,0.46493,0.13976,0.14094,0.13927,0.13822,0.14134,0.13825,0.14098,0.13945,0.1395,0.13922,0.1406,0.13862,0.13924,0.1395,0.14287,0.1405,0.13723,0.13631,0.6295,0.65105,0.63881,0.60452,0.63602,0.53759,0.5846,0.70221,0.63341,0.78019,0.51624,0.34613,0.36511,0.47007,0.46758,0.4283,0.47021,0.40544,0.49783,0.14025,0.14037,0.13864,0.14043,0.13914,0.14138,0.14078,0.13932,0.1396,0.13917,0.14135,0.13907,0.13801,0.14033,0.14193,0.13939,0.1393,0.13518,0.71819,0.61071,0.63427,0.69101,0.6415,0.57483,0.5941,0.51052,0.52573,0.64266,0.41005,0.55401,0.317,0.52078,0.4646,0.48971,0.48963,0.51863,0.13806,0.1404,0.14092,0.14123,0.14056,0.13799,0.14173,0.13893,0.14151,0.1403,0.13873,0.14058,0.1397,0.14002,0.13795,0.13985,0.13943,0.14088,0.13606,0.63262,0.76021,0.59705,0.62401,0.64345,0.59847,0.58837,0.64987,0.56637,0.64013,0.48361,0.45103,0.42691,0.45346,0.49592,0.51368,0.5259,0.41617,0.14046,0.13979,0.13949,0.13981,0.13777,0.14037,0.13799,0.13872,0.13906,0.14005,0.13843,0.1413,0.13939,0.13925,0.13954,0.14122,0.14028,0.13443,0.13548,0.13429,0.63179,0.60987,0.61282,0.6303,0.64615,0.63746,0.60008,0.61616,0.62424,0.3919,0.43006,0.47251,0.42882,0.4879,0.48858,0.13774,0.14116,0.13907,0.13942,0.14005,0.14076,0.14037,0.13958,0.13872,0.1405,0.13984,0.13963,0.13839,0.14098,0.14046,0.13874,0.1415,0.13854,0.13703,0.13594,0.13238,0.13765,0.44293,0.62046,0.54584,0.48507,0.61622,0.62364,0.6972,0.70579,0.69155,0.52393,0.39995,0.45387,0.14182,0.14049,0.13976,0.13944,0.13991,0.14038,0.13928,0.13954,0.14265,0.14082,0.13985,0.13928,0.14,0.13891,0.13868,0.13916,0.13897,0.13888,0.13953,0.14082,0.13426,0.13592,0.1369,0.13511,0.13525,0.13549,0.647,0.62638,0.72286,0.62857,0.57687,0.63646,0.59315,0.64312,0.13963,0.13777,0.1396,0.13979,0.13898,0.14024,0.13786,0.14038,0.13851,0.13962,0.14002,0.14259,0.13929,0.13905,0.14246,0.14038,0.14004,0.13958,0.13914,0.14121,0.13971,0.13912,0.13889,0.13334,0.13613,0.13476,0.1354,0.13347,0.13706,0.64958,0.63249,0.69642,0.63082,0.64875,0.1351,0.13431,0.14131,0.14003,0.14064,0.13972,0.13956,0.14035,0.13996,0.14001,0.1388,0.14012,0.13802,0.14082,0.13968,0.14071,0.14009,0.13841,0.13978,0.14024,0.14005,0.1396,0.14026,0.13511,0.13496,0.13451,0.13772,0.13552,0.1353,0.13691,0.13763,0.13393,0.13428,0.61306,0.56985,0.13497,0.1373,0.1345,0.1358,0.14089,0.13897,0.14037,0.13835,0.14001,0.14026,0.13942,0.13918,0.1388,0.1402,0.13883,0.14059,0.14095,0.13924,0.13908,0.13913,0.13979,0.14148,0.14004,0.1351,0.13666,0.13658,0.13637,0.13613,0.1351,0.13352,0.13571,0.13489,0.13418,0.13526,0.137,0.13787,0.13574,0.13715,0.13398,0.13653,0.13931,0.14128,0.13899,0.14014,0.13931,0.13992,0.13979,0.14128,0.14083,0.13853,0.14046,0.14063,0.13905,0.13977,0.13887,0.13926,0.13757,0.13512,0.13501,0.13721,0.13582,0.13651,0.13387,0.13795,0.13801,0.13655,0.1352,0.13552,0.13691,0.13543,0.13923,0.13417,0.1353,0.1

3489,0.13761,0.13857,0.13954,0.14122,0.13869,0.14091,0.13846,0.13925,0.13897,0.13992,0.14033,0.14049,0.13958,0.13969,0.13649,0.13528,0.13459,0.13396,0.13517,0.13623,0.13755,0.13702,0.13445,0.1361,0.13798,0.13855,0.13414,0.13488,0.13659,0.13521,0.1366,0.13584,0.13609,0.13734,0.13641,0.1392,0.13905,0.1408,0.14155,0.14057,0.13927,0.13786,0.14023,0.13738,0.13536,0.1378,0.1358,0.13648,0.13721,0.13597,0.13536,0.13436,0.13621,0.13655,0.13675,0.13481,0.13515,0.13536,0.13371,0.13594,0.13728,0.13438,0.13571,0.13648,0.13625,0.13664,0.13602,0.13484,0.13648,0.13952,0.14106,0.13857,0.13899,0.13457,0.13383,0.13539,0.13707,0.13295,0.13179,0.13635,0.13291,0.13672,0.13768,0.13623,0.13579,0.13814,0.13565,0.13787,0.13608,0.13379,0.13601,0.13245,0.13497,0.13648,0.134,0.13641,0.13497,0.13733,0.13774,0.13902,0.13715,0.13456,0.13683,0.1352,0.13526,0.13782,0.1384,0.13646,0.13474,0.13744,0.13318,0.13506,0.13499,0.13763,0.1372,0.136,0.13722,0.13456,0.13839,0.13481,0.13673,0.13669,0.13685,0.13492,0.13614,0.13404,0.13393,0.13487,0.13605,0.13636,0.13511,0.13541,0.13459,0.13597,0.13386,0.1374,0.13413,0.13612,0.13626,0.13542,0.13597,0.13672,0.13672,0.13717,0.13796,0.13401,0.13616,0.13337,0.13507,0.13645,0.13696,0.13575,0.13458,0.13301,0.13696,0.13598,0.13274,0.13683,0.13578,0.13455,0.13429,0.13652,0.13484,0.1339,0.13319,0.13624,0.13589,0.13788,0.13621,0.13598,0.13587,0.13493,0.13618,0.13548,0.13865,0.1357,0.13587,0.1341,0.13669,0.13701,0.13449,0.1365,0.13454,0.13611,0.13661,0.13429,0.13665,0.136,0.13695,0.13531,0.13657,0.13631,0.1348,0.13452,0.1356,0.13713,0.13636,0.13646,0.13719,0.13559,0.13709,0.13691,0.1352,0.1337,0.13509,0.1343,0.13543,0.13567,0.13475,0.13502,0.13605,0.13759,0.13478,0.13375,0.13626,0.13569,0.13684,0.13615,0.13772,0.13884,0.13692,0.13665,0.13803,0.13595,0.1362,0.13601,0.13481,0.13538,0.13887,0.13438,0.13621,0.13386,0.13495,0.13501,0.13602,0.13646,0.13515,0.13682,0.13687,0.13519,0.13653,0.13678,0.13596,0.13722,0.13396,0.13587,0.1361,0.13601,0.13861,0.13356,0.13588,0.13597,0.13724,0.13451,0.13516,0.13407,0.13643,0.13567,0.13569,0.13303,0.13719,0.13683,0.13466,0.13811,0.13614,0.13591,0.13688,0.1384

0.16214,0.16281,0.16165,0.16549,0.16293,0.16255,0.15992,0.16276,0.16349,0.16352,0.16239,0.16573,0.15877,0.15984,0.16286,0.16365,0.16023,0.16268,0.16383,0.16167,0.56219,0.47948,0.61816,0.48842,0.16158,0.16413,0.16434,0.15949,0.16327,0.16349,0.1601,0.15923,0.15901,0.16135,0.1645,0.15902,0.1577,0.15894,0.16012,0.80275,0.50622,0.49198,0.49649,0.48765,0.49141,0.50145,0.15802,0.16066,0.16344,0.16315,0.16459,0.16254,0.15987,0.16223,0.16045,0.1619,0.16207,0.16316,0.16184,0.16373,0.16291,0.849,0.815,0.48982,0.55312,0.42822,0.50487,0.48995,0.48492,0.4829,0.47422,0.16187,0.1634,0.16334,0.16171,0.16313,0.16202,0.16112,0.1604,0.16348,0.16493,0.15945,0.16034,0.16246,0.1612,0.1634,0.81907,0.79704,0.81768,0.33118,0.615,0.50702,0.51015,0.5049,0.46993,0.57395,0.50465,0.48441,0.16423,0.15994,0.16215,0.16214,0.16422,0.16188,0.15945,0.16233,0.16404,0.16319,0.16209,0.16352,0.16358,0.16104,0.15927,0.15869,0.82592,0.83643,0.83155,0.8131,0.50938,0.50862,0.38695,0.50077,0.43704,0.47707,0.46736,0.51707,0.51421,0.55039,0.15976,0.16414,0.16294,0.16396,0.16043,0.16282,0.16165,0.16247,0.16249,0.16085,0.16083,0.1626,0.16141,0.16364,0.15873,0.1609,0.80529,0.82706,0.84202,0.83373,0.80718,0.80197,0.46919,0.54266,0.46445,0.47192,0.49382,0.52397,0.45963,0.49982,0.48353,0.47468,0.1628,0.16446,0.16287,0.16236,0.15984,0.1583,0.1628,0.16158,0.16536,0.16451,0.16071,0.16202,0.16541,0.15906,0.16294,0.16016,0.16317,0.809,0.84431,0.80774,0.85724,0.8338,0.83658,0.48211,0.43826,0.49558,0.53033

,0.54291,0.53648,0.4866,0.48136,0.48594,0.4822,0.49787,0.16188,0.15996  
,0.16086,0.16061,0.15943,0.15887,0.15855,0.16265,0.15955,0.16406,0.161  
88,0.1574,0.16043,0.13994,0.13419,0.13922,0.16642,0.81476,0.83635,0.81  
643,0.82502,0.82754,0.83197,0.82339,0.53246,0.48171,0.51289,0.48653,0.  
53237,0.51102,0.46527,0.50169,0.50469,0.52607,0.47716,0.16112,0.164,0.  
16133,0.15793,0.16053,0.1653,0.16273,0.16308,0.15901,0.15933,0.16053,0.  
.1319,0.13797,0.13905,0.13875,0.13739,0.14023,0.16369,0.79549,0.82454,  
0.85194,0.82619,0.82972,0.8301,0.8268,0.50528,0.53933,0.46855,0.51719,  
0.49489,0.48195,0.49167,0.4845,0.5159,0.4921,0.42294,0.1587,0.16125,0.  
16097,0.16329,0.15894,0.16449,0.16257,0.1605,0.16401,0.13808,0.13872,0.  
.14322,0.13864,0.13874,0.13844,0.1399,0.14141,0.13857,0.163,0.84171,0.  
83085,0.85168,0.85277,0.81801,0.80002,0.81154,0.43777,0.48144,0.4835,0.  
.49388,0.48607,0.49318,0.4972,0.42136,0.50003,0.47842,0.48645,0.40271,  
0.16046,0.16423,0.16476,0.16492,0.15982,0.16496,0.13584,0.13825,0.1405  
3,0.13839,0.14297,0.13872,0.13832,0.13964,0.1399,0.14381,0.14053,0.139  
07,0.82278,0.82621,0.81978,0.83068,0.82882,0.83592,0.83809,0.43303,0.4  
9184,0.50166,0.49748,0.51448,0.51488,0.55999,0.49862,0.52022,0.50274,0.  
.49287,0.48795,0.16766,0.16119,0.16409,0.13818,0.14448,0.13563,0.13547  
,0.14213,0.1383,0.13859,0.13861,0.14106,0.13999,0.13928,0.13996,0.1391  
,0.14747,0.13876,0.83744,0.82128,0.84162,0.84266,0.80673,0.83818,0.853  
53,0.82566,0.8306,0.49812,0.48352,0.43087,0.5112,0.41566,0.47107,0.468  
62,0.49454,0.48525,0.56026,0.50962,0.14121,0.13864,0.13905,0.1375,0.13  
998,0.13815,0.13895,0.14087,0.14188,0.1372,0.13521,0.13956,0.13805,0.1  
3832,0.13842,0.13368,0.13758,0.1415,0.82888,0.84425,0.83757,0.81579,0.  
85783,0.83586,0.83979,0.81883,0.8183,0.52018,0.4693,0.42027,0.31131,0.  
38026,0.3731,0.38162,0.37221,0.42516,0.3572,0.37233,0.13906,0.14361,0.  
13552,0.13393,0.13672,0.14397,0.14094,0.1384,0.14185,0.13315,0.13864,0.  
.14042,0.1382,0.1381,0.14103,0.13713,0.13864,0.13757,0.81763,0.8178,0.  
81434,0.84939,0.82983,0.80148,0.83925,0.81574,0.84509,0.44222,0.36957,  
0.38731,0.3951,0.3434,0.40712,0.35,0.43055,0.40109,0.37878,0.29327,0.1  
3784,0.1395,0.14285,0.1374,0.13899,0.14345,0.14589,0.14005,0.14464,0.1  
4012,0.13901,0.14117,0.14262,0.13639,0.1375,0.13873,0.13812,0.13977,0.  
80794,0.79459,0.82905,0.83331,0.85099,0.81468,0.81461,0.47902,0.50742,  
0.55431,0.36241,0.37848,0.36612,0.37064,0.34439,0.39925,0.36557,0.3750  
2,0.36574,0.3854,0.14017,0.13832,0.14099,0.13635,0.13893,0.13792,0.138  
15,0.14481,0.13961,0.14003,0.13646,0.14074,0.13778,0.13732,0.1352,0.13  
808,0.13656,0.1435,0.83475,0.8087,0.84117,0.83221,0.85082,0.82775,0.49  
96,0.49148,0.48487,0.45368,0.45883,0.41829,0.37492,0.35869,0.38726,0.3  
9403,0.3784,0.39178,0.37668,0.40198,0.13826,0.13929,0.13943,0.13815,0.  
13601,0.13794,0.13803,0.13803,0.14089,0.1403,0.14568,0.13905,0.13925,0.  
.13737,0.14463,0.14105,0.13546,0.13853,0.79154,0.81589,0.83383,0.80855  
,0.8041,0.50839,0.48429,0.46101,0.48296,0.44262,0.35315,0.34807,0.3838  
8,0.38394,0.3808,0.40915,0.37047,0.38538,0.37761,0.38481,0.14308,0.134  
31,0.14293,0.13748,0.13293,0.13935,0.13855,0.14283,0.13655,0.13886,0.1  
3773,0.14002,0.13984,0.1403,0.13869,0.14288,0.137,0.13939,0.83379,0.82  
343,0.85679,0.47211,0.46569,0.48367,0.5041,0.47365,0.52892,0.43754,0.5  
0387,0.41922,0.37873,0.37955,0.39503,0.31722,0.36999,0.41723,0.32551,0.  
.3434,0.13847,0.13945,0.13499,0.13822,0.13557,0.14082,0.14162,0.13674,  
0.13962,0.13592,0.13792,0.14057,0.13867,0.14246,0.13509,0.13752,0.1388  
1,0.13922,0.85391,0.48366,0.5301,0.45376,0.43275,0.48269,0.45701,0.478  
8,0.47387,0.47451,0.36524,0.37079,0.39665,0.36199,0.39547,0.37609,0.37  
454,0.36806,0.37041,0.13811,0.14,0.13778,0.13733,0.13924,0.13553,0.139

11,0.13852,0.13989,0.13907,0.13807,0.13738,0.13756,0.1399,0.14771,0.13  
906,0.13338,0.11575,0.47112,0.4984,0.48254,0.45513,0.48022,0.41037,0.4  
4066,0.51733,0.47455,0.57803,0.40895,0.28458,0.29333,0.37209,0.37148,0  
.33977,0.36904,0.32869,0.3853,0.13918,0.13967,0.13851,0.13862,0.13833,  
0.1339,0.14054,0.13557,0.14019,0.13713,0.14265,0.13691,0.13702,0.1402,  
0.14064,0.13868,0.13842,0.11577,0.53643,0.45492,0.48195,0.52424,0.4877  
2,0.434,0.4457,0.38466,0.4041,0.48058,0.32758,0.42864,0.26799,0.40495,  
0.3732,0.38511,0.38689,0.41258,0.13647,0.13849,0.13992,0.13983,0.13923  
,0.13319,0.14442,0.13966,0.14159,0.13899,0.13946,0.13972,0.13842,0.138  
58,0.13465,0.13887,0.13823,0.13983,0.11633,0.47906,0.5694,0.44652,0.47  
676,0.48805,0.44575,0.44323,0.48371,0.42264,0.47957,0.38815,0.35832,0.  
33577,0.3602,0.39476,0.39545,0.40315,0.33297,0.14277,0.1395,0.13813,0.  
13913,0.13642,0.14488,0.13639,0.13865,0.13814,0.13994,0.13788,0.13936,  
0.13519,0.13757,0.13563,0.14006,0.14153,0.11469,0.11594,0.11511,0.4763  
3,0.46512,0.45813,0.47661,0.48177,0.48299,0.44659,0.46131,0.46856,0.31  
424,0.34279,0.37365,0.33689,0.38464,0.38879,0.13171,0.14044,0.13948,0.  
13897,0.13938,0.13959,0.13731,0.14044,0.1353,0.14143,0.1386,0.13596,0.  
13634,0.13996,0.13783,0.13512,0.14061,0.13758,0.11689,0.11679,0.1126,0  
.11746,0.3358,0.46645,0.40935,0.37548,0.45297,0.47014,0.52205,0.52582,  
0.52017,0.40531,0.32132,0.36096,0.14452,0.13847,0.13451,0.13599,0.1425  
5,0.14232,0.14214,0.13604,0.14345,0.13964,0.14166,0.14085,0.13907,0.14  
171,0.13828,0.13812,0.13877,0.13933,0.1348,0.14034,0.11446,0.11588,0.1  
1673,0.11511,0.11584,0.11587,0.47612,0.47567,0.5331,0.48262,0.43115,0.  
47962,0.45612,0.48518,0.13639,0.13264,0.13236,0.13957,0.13715,0.13849,  
0.13692,0.13948,0.13036,0.13948,0.14137,0.15047,0.13751,0.13764,0.1476  
3,0.1401,0.13872,0.1327,0.13822,0.13906,0.13824,0.13707,0.13923,0.1140  
9,0.116,0.1143,0.11641,0.1141,0.11725,0.47933,0.4748,0.52232,0.47027,0  
.48858,0.11552,0.11448,0.14033,0.13938,0.1396,0.13907,0.1385,0.13896,0  
.13831,0.141,0.13742,0.13641,0.13647,0.13847,0.14031,0.13918,0.13767,0  
.13643,0.13919,0.13799,0.13947,0.14034,0.13981,0.11522,0.1157,0.11351,  
0.11849,0.11451,0.1156,0.11737,0.11787,0.11413,0.1145,0.45613,0.42929,  
0.11491,0.11719,0.11451,0.11577,0.14226,0.13147,0.13942,0.13807,0.1396  
2,0.14248,0.13906,0.13867,0.13896,0.13649,0.13499,0.14274,0.14189,0.13  
836,0.13906,0.13844,0.13651,0.14277,0.14011,0.1155,0.1175,0.11695,0.11  
657,0.11583,0.11524,0.11474,0.11561,0.11519,0.1144,0.11559,0.11766,0.1  
1704,0.11623,0.11795,0.11511,0.11663,0.13756,0.14156,0.13511,0.13385,0  
.13841,0.13802,0.14026,0.13766,0.13847,0.13776,0.13849,0.1408,0.13608,  
0.13962,0.13954,0.13874,0.11726,0.11544,0.11534,0.11725,0.11642,0.1169  
1,0.11436,0.11742,0.11777,0.11686,0.11576,0.1148,0.11617,0.1153,0.1188  
1,0.11562,0.11605,0.11548,0.11793,0.136,0.1372,0.14489,0.1384,0.13683,  
0.13715,0.13868,0.13966,0.13707,0.13999,0.14018,0.14212,0.13551,0.1172  
2,0.11614,0.11509,0.11454,0.11486,0.11533,0.11684,0.11761,0.11485,0.11  
597,0.11743,0.11924,0.11442,0.11567,0.11782,0.11496,0.11684,0.11661,0.  
11608,0.11717,0.11566,0.13741,0.13817,0.14148,0.14001,0.14209,0.13438,  
0.13523,0.1392,0.13721,0.11548,0.11776,0.11567,0.11756,0.11713,0.11585  
,0.1157,0.11484,0.11694,0.11594,0.11728,0.1162,0.11599,0.11596,0.11371  
,0.11669,0.11788,0.11445,0.11659,0.11653,0.11691,0.11689,0.1162,0.1152  
9,0.11714,0.13707,0.14322,0.13685,0.1343,0.11423,0.11409,0.11574,0.117  
2,0.11335,0.11228,0.11586,0.11328,0.11616,0.11892,0.11627,0.1162,0.117  
84,0.11631,0.11859,0.11671,0.11391,0.11514,0.11288,0.11571,0.11669,0.1  
1545,0.11616,0.11511,0.11825,0.11812,0.11906,0.11701,0.1142,0.11644,0.  
11545,0.1151,0.11821,0.11874,0.11678,0.11463,0.11729,0.11259,0.11563,0

.11574,0.11656,0.11726,0.11586,0.11718,0.11442,0.11803,0.1153,0.11665,  
0.11636,0.11745,0.11488,0.11679,0.11469,0.11447,0.11552,0.11643,0.1165  
1,0.1153,0.11567,0.1146,0.11619,0.11461,0.11796,0.11621,0.11693,0.1162  
1,0.11547,0.11596,0.11704,0.11625,0.11822,0.11854,0.11358,0.11755,0.11  
403,0.11486,0.11649,0.11793,0.11455,0.11537,0.11265,0.11601,0.11703,0.  
11309,0.11659,0.11571,0.11466,0.11492,0.11605,0.11483,0.11443,0.11421,  
0.11627,0.11537,0.11817,0.11713,0.1165,0.11594,0.11526,0.11635,0.11573  
,0.11852,0.11497,0.11589,0.11437,0.11625,0.11746,0.11538,0.11689,0.115  
4,0.11582,0.11691,0.1162,0.11713,0.11653,0.11637,0.11542,0.11734,0.116  
15,0.11479,0.11461,0.11556,0.11746,0.11785,0.11613,0.11728,0.11511,0.1  
1713,0.11682,0.11519,0.11502,0.11509,0.11335,0.11658,0.11595,0.11533,0  
.11503,0.11633,0.11729,0.11445,0.11486,0.11557,0.11543,0.11736,0.11575  
,0.11817,0.11859,0.11755,0.11659,0.11902,0.1167,0.11597,0.11624,0.1151  
5,0.11671,0.11898,0.11468,0.11619,0.11363,0.11455,0.11454,0.11638,0.11  
675,0.11514,0.11635,0.11716,0.11555,0.11645,0.11708,0.11618,0.1174,0.1  
1469,0.11646,0.11634,0.11532,0.11943,0.11414,0.11648,0.11577,0.11782,0  
.11522,0.11644,0.11522,0.11645,0.11543,0.11566,0.1141,0.11732,0.11685,  
0.11472,0.11726,0.11603,0.11633,0.11652,0.11947  
0.17391,0.17391,0.17234,0.17707,0.17287,0.17348,0.17142,0.17454,0.1752  
1,0.17649,0.17418,0.1772,0.17168,0.17262,0.17417,0.17321,0.17162,0.174  
16,0.17558,0.17362,0.45829,0.39776,0.50307,0.40229,0.17301,0.176,0.175  
12,0.17258,0.1737,0.17494,0.17116,0.17126,0.17131,0.17203,0.17496,0.17  
189,0.16958,0.17019,0.17128,0.62769,0.41544,0.41541,0.41422,0.40587,0.  
41008,0.42008,0.16895,0.17083,0.17513,0.1755,0.1756,0.17367,0.17164,0.  
17362,0.17213,0.17375,0.17305,0.17432,0.17442,0.17675,0.1741,0.6631,0.  
62832,0.40759,0.45286,0.35979,0.42394,0.41623,0.4053,0.40518,0.39253,0  
.17401,0.17463,0.17509,0.17385,0.1749,0.17355,0.17071,0.17237,0.17542,  
0.17553,0.17126,0.17058,0.17372,0.17257,0.17394,0.64785,0.62994,0.6358  
,0.29501,0.50807,0.42272,0.42503,0.42551,0.38934,0.4726,0.4186,0.39961  
,0.17563,0.17221,0.17363,0.17246,0.17547,0.17269,0.1712,0.17428,0.1750  
7,0.17576,0.17294,0.17487,0.17472,0.17273,0.1711,0.17024,0.63462,0.662  
22,0.66028,0.64231,0.42467,0.42109,0.33618,0.41483,0.37265,0.39579,0.3  
9636,0.42384,0.43153,0.44039,0.1723,0.1756,0.1754,0.1749,0.172,0.17408  
,0.17354,0.17366,0.17457,0.1731,0.17204,0.17386,0.17397,0.17489,0.1706  
2,0.17217,0.63731,0.66277,0.65845,0.65223,0.63535,0.61717,0.39647,0.43  
516,0.39112,0.39627,0.41664,0.44149,0.38281,0.41166,0.39914,0.39485,0.  
17549,0.17562,0.17343,0.17358,0.17131,0.17199,0.1743,0.17218,0.17561,0  
.17682,0.17311,0.1745,0.1756,0.17177,0.17579,0.17157,0.17372,0.63448,0  
.65768,0.64927,0.68476,0.63337,0.65288,0.4098,0.37198,0.41545,0.43579,  
0.45227,0.45014,0.40609,0.39933,0.40788,0.39854,0.4105,0.17368,0.17206  
,0.17219,0.17246,0.17186,0.17025,0.16941,0.17405,0.1702,0.17511,0.1737  
,0.16933,0.17147,0.137,0.12733,0.13736,0.17581,0.62081,0.65458,0.6478,  
0.64309,0.65783,0.65973,0.63982,0.43462,0.40201,0.42693,0.40746,0.4389  
,0.4202,0.38622,0.41706,0.41311,0.42808,0.4023,0.17271,0.17668,0.17409  
,0.16996,0.17186,0.17727,0.17517,0.17423,0.17148,0.17158,0.17135,0.123  
96,0.13397,0.1341,0.13466,0.13324,0.13696,0.17501,0.62344,0.6345,0.658  
48,0.64898,0.64895,0.64924,0.66232,0.41942,0.44882,0.38484,0.42456,0.4  
1158,0.40053,0.41308,0.40809,0.42846,0.40558,0.35813,0.17165,0.17271,0  
.17274,0.17477,0.16943,0.17678,0.17481,0.17308,0.17542,0.13453,0.1344,  
0.14127,0.13431,0.1348,0.13326,0.13551,0.13876,0.13451,0.17508,0.66935  
,0.66468,0.66911,0.66571,0.64064,0.62673,0.6381,0.37452,0.39934,0.4117  
7,0.41201,0.41159,0.40936,0.41214,0.35927,0.41262,0.40365,0.40819,0.34

562,0.17229,0.17458,0.17668,0.17556,0.17316,0.17753,0.13024,0.1346,0.1  
3752,0.13437,0.14277,0.13508,0.13321,0.13599,0.13565,0.14331,0.13613,0  
.13556,0.66455,0.65409,0.63631,0.6644,0.65967,0.66037,0.6539,0.36896,0  
.40996,0.41445,0.42053,0.42698,0.42684,0.46067,0.41944,0.44019,0.41586  
,0.40538,0.40281,0.17921,0.17288,0.17463,0.13322,0.14364,0.12925,0.129  
76,0.13818,0.13375,0.13473,0.1347,0.1373,0.13579,0.13517,0.1385,0.1363  
8,0.14811,0.13494,0.65139,0.6401,0.65828,0.65974,0.63661,0.66892,0.675  
86,0.64592,0.65727,0.41264,0.39753,0.36765,0.42374,0.35786,0.39652,0.3  
9369,0.41095,0.40502,0.4541,0.42483,0.13677,0.13483,0.13447,0.1334,0.1  
3565,0.13352,0.13285,0.1361,0.13902,0.13324,0.12909,0.13487,0.13467,0.  
13398,0.1347,0.12704,0.1318,0.13918,0.63777,0.67482,0.66089,0.63612,0.  
66847,0.66291,0.65743,0.64775,0.63576,0.43137,0.39542,0.3452,0.26688,0  
.31492,0.31264,0.31318,0.31199,0.3514,0.2988,0.31154,0.13586,0.14276,0  
.13013,0.12657,0.13278,0.14383,0.13794,0.134,0.1391,0.12588,0.13431,0.  
13608,0.13334,0.13448,0.13799,0.13309,0.13456,0.13324,0.63308,0.62393,  
0.63042,0.67668,0.65358,0.6127,0.66503,0.63689,0.66582,0.35282,0.30875  
,0.31858,0.32847,0.28722,0.34242,0.29027,0.35624,0.33361,0.31901,0.249  
74,0.13396,0.13559,0.14096,0.1337,0.13419,0.14437,0.14623,0.13611,0.14  
29,0.13593,0.13449,0.13761,0.14099,0.13077,0.13003,0.13487,0.13193,0.1  
3575,0.64197,0.61286,0.64762,0.6566,0.68287,0.65287,0.63796,0.37519,0.  
39958,0.43682,0.29705,0.31678,0.30711,0.30714,0.28582,0.32348,0.30684,  
0.31797,0.30634,0.31702,0.13553,0.13372,0.13868,0.13085,0.13601,0.1337  
9,0.13446,0.14488,0.13564,0.13683,0.13026,0.13723,0.13318,0.13416,0.12  
937,0.13217,0.13171,0.1415,0.6609,0.63039,0.67042,0.67478,0.67235,0.64  
853,0.38636,0.38514,0.38772,0.35763,0.36167,0.34458,0.31334,0.29612,0.  
32096,0.33206,0.31341,0.32672,0.30764,0.33537,0.13435,0.13497,0.13437,  
0.1338,0.13,0.13346,0.1326,0.13249,0.1373,0.13753,0.14502,0.13569,0.13  
522,0.13182,0.14322,0.13844,0.12837,0.13445,0.62222,0.64107,0.64269,0.  
64379,0.64452,0.40156,0.37951,0.35559,0.37541,0.3558,0.28124,0.29285,0  
.32009,0.31371,0.31205,0.33406,0.31289,0.31377,0.31342,0.32004,0.14106  
,0.12795,0.14188,0.13275,0.12544,0.13566,0.13303,0.14203,0.12976,0.134  
33,0.13151,0.13534,0.13612,0.13553,0.13534,0.13982,0.13042,0.13576,0.6  
7506,0.64163,0.66791,0.37482,0.36971,0.39057,0.39385,0.37526,0.41761,0  
.34949,0.40233,0.34668,0.30966,0.31475,0.33284,0.27077,0.31156,0.34072  
,0.27505,0.28579,0.13312,0.13547,0.12889,0.13432,0.1306,0.13799,0.1397  
,0.13376,0.13538,0.12878,0.13388,0.13653,0.13549,0.14232,0.12945,0.134  
,0.13458,0.13511,0.66157,0.38635,0.4106,0.35913,0.34086,0.38775,0.3604  
5,0.38366,0.38328,0.37408,0.30216,0.30963,0.32582,0.30155,0.3307,0.310  
73,0.31252,0.30785,0.3081,0.13368,0.13587,0.13397,0.13354,0.13465,0.13  
015,0.1345,0.13409,0.13716,0.13626,0.13356,0.13395,0.13296,0.13725,0.1  
4835,0.13464,0.12722,0.096001,0.37479,0.39475,0.37386,0.36278,0.3734,0  
.32753,0.35394,0.4093,0.37685,0.46576,0.33992,0.24227,0.25214,0.30951,  
0.30929,0.28261,0.30752,0.27943,0.31153,0.13499,0.13559,0.13582,0.1344  
9,0.13459,0.125,0.13628,0.12944,0.13731,0.13263,0.1401,0.13301,0.13237  
,0.13698,0.1363,0.13418,0.13478,0.096141,0.42221,0.35683,0.38218,0.417  
48,0.38956,0.34236,0.34596,0.30789,0.32321,0.38148,0.27506,0.3564,0.23  
459,0.33357,0.30807,0.31871,0.32312,0.34273,0.13217,0.13461,0.13494,0.  
13664,0.13547,0.12539,0.14422,0.13684,0.13867,0.1353,0.13757,0.13581,0  
.13492,0.13503,0.12886,0.13474,0.13348,0.13601,0.095568,0.38733,0.4470  
8,0.35337,0.38289,0.38341,0.34963,0.34993,0.37671,0.33339,0.38166,0.31  
769,0.29853,0.28032,0.30318,0.32622,0.31852,0.3238,0.28001,0.14156,0.1  
3535,0.1339,0.13505,0.13254,0.14542,0.13171,0.13417,0.13355,0.13649,0.



13315,0.13524,0.12884,0.13236,0.12992,0.13671,0.14023,0.095577,0.09683  
,0.095663,0.38006,0.37495,0.3601,0.37461,0.37455,0.38179,0.35664,0.365  
39,0.36695,0.26441,0.28276,0.3116,0.27402,0.31329,0.32357,0.12367,0.13  
697,0.13768,0.13456,0.13466,0.13605,0.13283,0.13664,0.12812,0.13898,0.  
13408,0.12962,0.13211,0.13484,0.13137,0.1295,0.13616,0.13335,0.09634,0  
.096719,0.093442,0.097972,0.26308,0.36248,0.3276,0.29986,0.34924,0.370  
76,0.42216,0.42272,0.41974,0.33308,0.27397,0.3018,0.14333,0.13232,0.12  
736,0.13018,0.14166,0.14034,0.14207,0.12992,0.14006,0.13546,0.14012,0.  
13981,0.13416,0.14159,0.13461,0.13442,0.13599,0.13699,0.1274,0.13702,0  
.095045,0.096474,0.097196,0.09591,0.095083,0.096392,0.37076,0.36747,0.  
42268,0.38588,0.34012,0.37327,0.35395,0.37819,0.1296,0.12539,0.12208,0  
.1359,0.13358,0.13375,0.13346,0.13588,0.12057,0.13446,0.13845,0.15429,  
0.13367,0.13377,0.14852,0.1365,0.135,0.12379,0.13452,0.13339,0.13323,0  
.13161,0.13598,0.094492,0.096141,0.094602,0.09729,0.094554,0.098111,0.  
3809,0.37321,0.4199,0.36948,0.38297,0.095874,0.095007,0.1363,0.13543,0  
.13523,0.1352,0.13505,0.1351,0.13353,0.13821,0.13252,0.13045,0.13211,0  
.13346,0.13652,0.13509,0.13159,0.13186,0.13585,0.13339,0.13511,0.1374,  
0.13611,0.096793,0.095544,0.094585,0.098455,0.095146,0.096076,0.097741  
,0.098883,0.094623,0.09447,0.35646,0.33977,0.095101,0.09607,0.09535,0.  
097516,0.1405,0.12221,0.13494,0.13524,0.13661,0.1411,0.13446,0.13518,0  
.13537,0.13184,0.12921,0.14188,0.13894,0.13365,0.13578,0.13522,0.13095  
,0.1408,0.13782,0.09604,0.09828,0.09758,0.097569,0.096432,0.094715,0.0  
95998,0.095551,0.09541,0.09445,0.095873,0.097464,0.097409,0.097298,0.0  
99056,0.095508,0.096194,0.13331,0.13829,0.12855,0.12626,0.13367,0.1329  
6,0.13619,0.13051,0.13448,0.13337,0.13385,0.13724,0.13037,0.13573,0.13  
729,0.13554,0.097008,0.095604,0.096234,0.097021,0.097522,0.096459,0.09  
6082,0.097062,0.098044,0.097641,0.095779,0.095842,0.096544,0.095866,0.  
098551,0.095772,0.097,0.096,0.098692,0.13016,0.13183,0.14482,0.13453,0  
.13041,0.13343,0.13491,0.1365,0.13167,0.13713,0.13724,0.13934,0.12875,  
0.096995,0.096435,0.096583,0.093752,0.09542,0.094904,0.097171,0.098813  
,0.095615,0.095753,0.097923,0.10021,0.095326,0.095689,0.098155,0.09504  
,0.09704,0.097311,0.096018,0.096771,0.095839,0.13279,0.13547,0.1392,0.  
13645,0.14051,0.12741,0.12923,0.13484,0.13375,0.095211,0.097683,0.0962  
94,0.097893,0.097421,0.094986,0.095924,0.095101,0.096961,0.096783,0.09  
7984,0.09554,0.09754,0.096181,0.094261,0.096529,0.09732,0.093992,0.096  
955,0.096759,0.096451,0.096997,0.096544,0.096455,0.097684,0.13162,0.14  
113,0.13223,0.12657,0.09439,0.095005,0.095143,0.097415,0.094051,0.0926  
99,0.095595,0.093942,0.096102,0.098394,0.095848,0.09457,0.097744,0.096  
788,0.098681,0.09728,0.094767,0.096022,0.092848,0.096408,0.097352,0.09  
5091,0.096662,0.095397,0.098874,0.09854,0.099391,0.097404,0.094067,0.0  
96873,0.096688,0.09616,0.098026,0.097853,0.09669,0.095674,0.097347,0.0  
93587,0.095415,0.096301,0.097604,0.097035,0.096676,0.097521,0.09472,0.  
097799,0.095882,0.097055,0.096699,0.098282,0.094863,0.097254,0.09549,0  
.095469,0.094984,0.096411,0.096843,0.095666,0.096177,0.094448,0.096072  
,0.095221,0.098723,0.096694,0.096741,0.096706,0.095675,0.095783,0.0969  
4,0.09722,0.098383,0.099075,0.094236,0.098007,0.095098,0.096324,0.0971  
93,0.09782,0.094467,0.096005,0.093514,0.097289,0.096871,0.093616,0.096  
164,0.096013,0.09463,0.095879,0.095816,0.095973,0.094506,0.09504,0.096  
892,0.095494,0.098894,0.096204,0.096771,0.096326,0.097194,0.096603,0.0  
9557,0.097807,0.095262,0.096037,0.094227,0.096985,0.098131,0.095638,0.  
097066,0.096141,0.0965,0.096731,0.096141,0.097379,0.096364,0.096292,0.  
094901,0.097487,0.096172,0.095821,0.093858,0.096076,0.09754,0.097978,0

.095534,0.097612,0.095348,0.09806,0.098351,0.095211,0.095515,0.096084,  
0.093348,0.096562,0.095688,0.097004,0.095166,0.097303,0.097946,0.09456  
7,0.095175,0.09596,0.095299,0.096623,0.095253,0.097085,0.098986,0.0970  
8,0.096845,0.098172,0.096606,0.096637,0.096151,0.095986,0.097656,0.098  
236,0.094568,0.09633,0.093156,0.095054,0.095049,0.097571,0.096871,0.09  
5705,0.096244,0.096723,0.09616,0.09706,0.096714,0.097357,0.096833,0.09  
4734,0.097452,0.096406,0.095308,0.099322,0.093636,0.096909,0.095594,0.  
097437,0.09649,0.09699,0.096059,0.097183,0.095896,0.095391,0.094303,0.  
098304,0.096482,0.096224,0.097624,0.095928,0.09634,0.096707,0.099549  
0.18038,0.18176,0.17935,0.18514,0.18051,0.18197,0.1805,0.18203,0.18309  
,0.1834,0.18187,0.18441,0.18021,0.1821,0.18172,0.17978,0.18072,0.1822,  
0.18372,0.18069,0.39473,0.34759,0.43666,0.35055,0.17902,0.18357,0.1828  
6,0.18165,0.18081,0.18362,0.17935,0.17979,0.1799,0.17981,0.18202,0.180  
34,0.17758,0.17823,0.17926,0.52176,0.36654,0.36129,0.36646,0.35429,0.3  
614,0.36515,0.1773,0.17897,0.18405,0.18358,0.1812,0.18223,0.179,0.1816  
7,0.18072,0.18197,0.18032,0.18205,0.18209,0.18349,0.18217,0.55982,0.52  
203,0.35209,0.39574,0.31994,0.36722,0.36977,0.35778,0.35274,0.34581,0.  
18041,0.18335,0.18353,0.18303,0.1818,0.18041,0.17929,0.17999,0.18307,0  
.18213,0.17924,0.17906,0.18187,0.18125,0.18155,0.5412,0.51846,0.5284,0  
.27617,0.43317,0.37022,0.36537,0.37563,0.33781,0.41503,0.3719,0.3497,0  
.18329,0.18039,0.18076,0.18029,0.18308,0.18129,0.1812,0.18147,0.18291,  
0.18352,0.18213,0.18245,0.1819,0.18166,0.17924,0.17796,0.51552,0.56223  
,0.5504,0.54598,0.3676,0.36607,0.30577,0.36543,0.33576,0.34996,0.35479  
,0.36843,0.37822,0.37535,0.18026,0.18279,0.18373,0.18213,0.17871,0.182  
15,0.18146,0.18123,0.18318,0.18222,0.18043,0.18204,0.18079,0.18275,0.1  
7837,0.17904,0.53624,0.55544,0.5445,0.54853,0.52104,0.51057,0.35536,0.  
37393,0.3464,0.35355,0.36674,0.39069,0.33594,0.36279,0.35166,0.34819,0  
.18296,0.18276,0.18161,0.18131,0.17924,0.18044,0.18076,0.17998,0.18133  
,0.18462,0.18181,0.18303,0.18283,0.1804,0.1839,0.17969,0.18188,0.5288,  
0.54053,0.55734,0.56546,0.5221,0.56596,0.3574,0.3291,0.36833,0.38216,0  
.39067,0.395,0.35492,0.35332,0.36028,0.35369,0.36205,0.18134,0.18102,0  
.18033,0.18025,0.17845,0.17741,0.17757,0.18159,0.17827,0.18136,0.18068  
,0.17801,0.17914,0.13364,0.12122,0.13417,0.18311,0.51852,0.55106,0.534  
64,0.54217,0.54494,0.5586,0.51995,0.37723,0.35001,0.37711,0.35352,0.38  
486,0.36703,0.33828,0.37086,0.35996,0.37155,0.3564,0.18018,0.18392,0.1  
8119,0.18009,0.18078,0.18339,0.18221,0.18037,0.17927,0.17985,0.17953,0  
.11667,0.12979,0.12992,0.13044,0.12947,0.13303,0.18399,0.51832,0.53319  
,0.54359,0.53626,0.54106,0.53723,0.55965,0.3625,0.39482,0.33698,0.3756  
,0.35863,0.35568,0.36185,0.35338,0.37847,0.35738,0.31781,0.17959,0.179  
97,0.18054,0.18127,0.17801,0.18557,0.18215,0.18062,0.18259,0.12981,0.1  
3051,0.13924,0.13032,0.13032,0.12948,0.13133,0.13512,0.13043,0.18259,0  
.57031,0.53956,0.56432,0.56377,0.53419,0.51903,0.54565,0.33712,0.35348  
,0.35922,0.36793,0.3683,0.36291,0.36199,0.32535,0.3627,0.35607,0.36213  
,0.30868,0.18097,0.18273,0.18336,0.18296,0.1813,0.18494,0.1244,0.13025  
,0.13426,0.13065,0.142,0.13126,0.12745,0.13199,0.13175,0.14301,0.1314,  
0.13158,0.55231,0.54825,0.52693,0.57421,0.54493,0.54079,0.54303,0.3336  
3,0.35581,0.36223,0.36765,0.3722,0.37747,0.40217,0.37284,0.38155,0.363  
1,0.35456,0.35789,0.18684,0.18096,0.18277,0.12785,0.14136,0.12289,0.12  
429,0.13398,0.12864,0.13001,0.12959,0.13332,0.13137,0.13072,0.13633,0.  
13345,0.14796,0.1318,0.5373,0.51918,0.53753,0.53958,0.53482,0.55434,0.  
55979,0.53522,0.53968,0.36398,0.35361,0.32477,0.37183,0.31379,0.34338,  
0.35444,0.35748,0.35557,0.39186,0.37269,0.13183,0.1309,0.13007,0.12891

,0.13166,0.1297,0.12805,0.13164,0.13599,0.12922,0.12245,0.13142,0.13096,0.12924,0.13142,0.11972,0.12631,0.13417,0.52619,0.56057,0.55905,0.53617,0.54898,0.54463,0.54974,0.52881,0.53473,0.38492,0.34371,0.30508,0.23317,0.27138,0.27339,0.27157,0.2764,0.30245,0.25891,0.27183,0.13229,0.14063,0.12487,0.12027,0.12911,0.14125,0.13502,0.12979,0.13516,0.11894,0.1294,0.13188,0.1286,0.12956,0.13451,0.12803,0.13039,0.12802,0.52701,0.52702,0.52691,0.57578,0.54671,0.5022,0.54531,0.51602,0.55838,0.29074,0.26731,0.27207,0.28875,0.25193,0.29931,0.25564,0.30888,0.28429,0.28028,0.22351,0.12943,0.13232,0.13875,0.13037,0.12983,0.14333,0.14517,0.13114,0.14086,0.13222,0.12978,0.13412,0.1389,0.12548,0.124,0.13019,0.12631,0.13071,0.53604,0.51333,0.55353,0.55035,0.57464,0.54838,0.5251,0.30994,0.32453,0.36127,0.25687,0.27453,0.27454,0.26935,0.25233,0.27643,0.26897,0.27758,0.26762,0.27959,0.13142,0.12935,0.1362,0.12543,0.13122,0.12995,0.13083,0.14313,0.13126,0.13136,0.12453,0.13297,0.12854,0.13052,0.12531,0.12656,0.12651,0.13898,0.55721,0.52411,0.55454,0.57005,0.5569,0.54261,0.31614,0.31832,0.32367,0.29455,0.30155,0.29204,0.27301,0.26151,0.28013,0.2926,0.27637,0.28434,0.26799,0.29742,0.12961,0.13167,0.13052,0.12935,0.12534,0.12956,0.12769,0.12837,0.13361,0.13425,0.14317,0.13105,0.13108,0.12688,0.14072,0.13462,0.12223,0.13017,0.50954,0.52638,0.5402,0.52735,0.54718,0.33171,0.31966,0.29709,0.32117,0.30215,0.23601,0.25619,0.28042,0.27413,0.27551,0.28494,0.27053,0.26698,0.27478,0.27776,0.13931,0.12164,0.14025,0.12821,0.11877,0.13107,0.1278,0.1405,0.12406,0.12984,0.1257,0.13177,0.13149,0.13074,0.13176,0.13789,0.12523,0.13134,0.57293,0.52921,0.54971,0.31236,0.30547,0.32394,0.33262,0.31725,0.34765,0.28212,0.33735,0.29835,0.27252,0.26947,0.29383,0.2385,0.27157,0.28672,0.23985,0.25368,0.12856,0.13143,0.12255,0.13044,0.12453,0.13541,0.13655,0.12973,0.13104,0.1224,0.13024,0.13158,0.13168,0.13919,0.12364,0.12949,0.13045,0.13122,0.54694,0.32234,0.32852,0.29669,0.28038,0.32893,0.3028,0.31317,0.3148,0.31078,0.26235,0.2697,0.28091,0.26159,0.2907,0.26879,0.27204,0.26897,0.26939,0.12949,0.13125,0.12996,0.12965,0.12855,0.12445,0.12947,0.1299,0.13428,0.13332,0.12979,0.12964,0.12789,0.13441,0.14682,0.1297,0.12039,0.07974,0.31398,0.33179,0.30761,0.29871,0.30543,0.27,0.2972,0.33119,0.31499,0.38306,0.29721,0.21337,0.22545,0.27585,0.26661,0.24796,0.26598,0.2455,0.2651,0.13074,0.13117,0.13206,0.13095,0.1292,0.11669,0.13193,0.12377,0.13393,0.12774,0.13745,0.12792,0.12783,0.1333,0.13143,0.12996,0.13023,0.080272,0.35341,0.29443,0.31612,0.34647,0.33107,0.27852,0.28779,0.26128,0.27086,0.31401,0.244,0.30784,0.21186,0.28363,0.26879,0.27531,0.27639,0.29677,0.12711,0.12997,0.13052,0.13213,0.1304,0.11902,0.14256,0.13282,0.13514,0.13167,0.13414,0.13142,0.13024,0.13136,0.12351,0.13102,0.12878,0.13082,0.079145,0.32965,0.37452,0.29791,0.31798,0.3232,0.29182,0.2928,0.31561,0.27423,0.31602,0.27621,0.26372,0.24571,0.26344,0.27928,0.27864,0.27449,0.24558,0.13897,0.13031,0.12915,0.13013,0.1285,0.14438,0.12655,0.12886,0.12941,0.13244,0.12888,0.13066,0.12291,0.12698,0.12421,0.13238,0.13833,0.079605,0.081099,0.080111,0.31561,0.31034,0.30666,0.30926,0.30914,0.31507,0.29686,0.30226,0.30997,0.23457,0.24869,0.26994,0.24275,0.27153,0.28281,0.11641,0.13338,0.13464,0.13098,0.13096,0.1313,0.12766,0.13331,0.12165,0.13638,0.13019,0.12364,0.12788,0.13074,0.12577,0.12453,0.13203,0.12827,0.080073,0.081393,0.078353,0.08159,0.22115,0.30339,0.27577,0.25386,0.28977,0.30988,0.35029,0.35229,0.35916,0.2948,0.23944,0.26284,0.14171,0.12686,0.12048,0.12448,0.13965,0.1381,0.13998,0.12419,0.1358,0.1313,0.13719,0.13681,0.12932,0.13949,0.13065,0.13137,0.13274,0.13396,0.1215,0.1

323,0.078495,0.080332,0.081585,0.07889,0.079009,0.079619,0.31136,0.309  
22,0.34939,0.31664,0.28087,0.31345,0.29381,0.31691,0.12384,0.11782,0.1  
1343,0.13162,0.12899,0.12917,0.12953,0.13251,0.11153,0.13108,0.13603,0  
.15487,0.12934,0.12963,0.14821,0.13302,0.13047,0.11586,0.1303,0.12803,  
0.12859,0.12607,0.1325,0.079058,0.080242,0.077409,0.080831,0.078538,0.  
081988,0.32069,0.31347,0.34754,0.30162,0.32267,0.079876,0.078418,0.131  
82,0.13112,0.13102,0.13071,0.13131,0.13134,0.12872,0.13507,0.12749,0.1  
2416,0.12695,0.12806,0.13306,0.13045,0.12638,0.12801,0.13202,0.128,0.1  
3085,0.13444,0.13291,0.081303,0.07998,0.07778,0.080656,0.079101,0.0792  
84,0.081564,0.082951,0.078226,0.078279,0.30275,0.28314,0.078056,0.0788  
32,0.079687,0.081369,0.13684,0.11456,0.13112,0.13126,0.13296,0.13876,0  
.12984,0.1301,0.13132,0.12661,0.12439,0.14007,0.13558,0.12848,0.13165,  
0.13112,0.12493,0.13814,0.13415,0.080361,0.081895,0.081278,0.081697,0.  
080511,0.07882,0.078754,0.079208,0.079536,0.078102,0.079762,0.080885,0  
.081308,0.08143,0.083187,0.078769,0.080245,0.12934,0.13474,0.12287,0.1  
1964,0.12992,0.12807,0.13292,0.12417,0.12879,0.12971,0.12922,0.13336,0  
.12417,0.1316,0.13461,0.13128,0.080855,0.079695,0.078995,0.080257,0.08  
1286,0.080322,0.079178,0.081026,0.081233,0.081419,0.079648,0.079996,0.  
080123,0.079325,0.082379,0.080277,0.080877,0.079907,0.082977,0.1245,0.  
12644,0.14406,0.13125,0.12433,0.12954,0.13014,0.13376,0.12607,0.13294,  
0.13372,0.13605,0.12331,0.08158,0.081102,0.079746,0.078675,0.079506,0.  
079053,0.080448,0.082236,0.080393,0.079013,0.081272,0.084179,0.079371,  
0.079384,0.081748,0.078628,0.081697,0.081554,0.08093,0.080028,0.079196  
,0.1274,0.13173,0.13679,0.13132,0.1375,0.12149,0.12492,0.13044,0.12926  
,0.078948,0.080966,0.080877,0.081279,0.081456,0.078702,0.079857,0.0785  
6,0.080441,0.081067,0.082068,0.079253,0.081799,0.079837,0.077479,0.080  
08,0.081564,0.077639,0.081021,0.08033,0.079678,0.080142,0.079882,0.080  
137,0.081095,0.12616,0.1382,0.12785,0.12003,0.078295,0.079118,0.079865  
,0.081382,0.077562,0.076321,0.079181,0.078169,0.080416,0.081815,0.0799  
42,0.078847,0.081361,0.080515,0.082714,0.080874,0.079491,0.07915,0.077  
132,0.079628,0.0815,0.0783,0.080624,0.079346,0.08207,0.082831,0.082426  
,0.08133,0.077613,0.081684,0.079449,0.078862,0.082632,0.081,0.080788,0  
.079579,0.079929,0.077892,0.080417,0.080467,0.080656,0.081238,0.080207  
,0.081212,0.078777,0.08136,0.080221,0.080167,0.080225,0.081264,0.07795  
8,0.081059,0.078658,0.079036,0.079421,0.079917,0.081035,0.079982,0.080  
999,0.078066,0.079882,0.078664,0.082774,0.080741,0.08045,0.080285,0.07  
9774,0.079233,0.080426,0.080342,0.081683,0.084009,0.07812,0.081806,0.0  
7926,0.080097,0.080698,0.080933,0.077779,0.079421,0.077061,0.080644,0.  
080703,0.077462,0.079947,0.080219,0.078649,0.080354,0.079308,0.079312,  
0.077944,0.07813,0.081154,0.079593,0.082674,0.079203,0.080883,0.079913  
,0.080796,0.080914,0.079677,0.082041,0.079679,0.079654,0.078445,0.0800  
91,0.080946,0.079942,0.081271,0.07853,0.080032,0.080443,0.080748,0.080  
416,0.079951,0.079809,0.078718,0.080632,0.080151,0.079037,0.077075,0.0  
79908,0.080767,0.08098,0.078893,0.081752,0.079978,0.081514,0.081905,0.  
078205,0.077875,0.080695,0.076943,0.080195,0.079551,0.081419,0.079133,  
0.080699,0.08168,0.077423,0.0784,0.079242,0.07882,0.078212,0.078931,0.  
081357,0.082283,0.080398,0.079525,0.081492,0.080905,0.080755,0.080072,  
0.079589,0.081614,0.082314,0.077239,0.080876,0.077909,0.078623,0.07866  
3,0.081659,0.080524,0.079374,0.080038,0.081226,0.079821,0.08065,0.0805  
44,0.08033,0.079069,0.07909,0.08134,0.080008,0.079307,0.082448,0.07734  
5,0.080114,0.078911,0.081852,0.080189,0.080675,0.078616,0.081386,0.078

538,0.078928,0.078275,0.082051,0.079047,0.079858,0.081191,0.080057,0.079774,0.080255,0.083064  
0.18301,0.18698,0.18424,0.18955,0.18574,0.18735,0.18454,0.18768,0.18733,0.18837,0.18802,0.18943,0.18557,0.18707,0.18712,0.18481,0.18577,0.18907,0.18876,0.18527,0.35962,0.32191,0.3877,0.31693,0.18627,0.18915,0.18763,0.18712,0.18486,0.18993,0.18516,0.18583,0.18529,0.18528,0.19,0.18564,0.18243,0.18439,0.18559,0.45945,0.33069,0.33434,0.33731,0.32685,0.33299,0.33734,0.1826,0.18359,0.18877,0.18833,0.18629,0.18694,0.18426,0.18645,0.18606,0.18778,0.18523,0.18687,0.18795,0.18889,0.18749,0.50778,0.46692,0.31927,0.35883,0.29578,0.33457,0.34043,0.32415,0.32432,0.31268,0.18515,0.18769,0.18884,0.18728,0.1867,0.18625,0.18659,0.18579,0.18789,0.18786,0.18568,0.18439,0.18731,0.18607,0.18745,0.48246,0.44433,0.46028,0.26157,0.38264,0.34255,0.32959,0.3441,0.31614,0.37179,0.34362,0.32117,0.18821,0.18596,0.18644,0.18519,0.18797,0.18595,0.18597,0.1863,0.18738,0.18927,0.18754,0.18801,0.18783,0.18749,0.18349,0.18549,0.43842,0.48895,0.46752,0.47077,0.33463,0.33781,0.28931,0.3379,0.30832,0.32536,0.33056,0.33841,0.34395,0.34499,0.18692,0.18902,0.1892,0.18776,0.18342,0.18722,0.18679,0.18708,0.18849,0.18818,0.18486,0.18778,0.1877,0.18884,0.18372,0.18368,0.46517,0.48346,0.46954,0.48112,0.45253,0.45188,0.3226,0.3311,0.31691,0.32594,0.32621,0.35667,0.30915,0.32889,0.3203,0.32265,0.18815,0.18773,0.18523,0.18578,0.18383,0.18677,0.18582,0.18649,0.18743,0.18937,0.18907,0.18891,0.18764,0.18434,0.18844,0.18713,0.1868,0.47266,0.4783,0.47328,0.49601,0.45388,0.49927,0.33258,0.29888,0.33669,0.35527,0.36303,0.3576,0.32378,0.32462,0.32519,0.32726,0.33364,0.18607,0.18604,0.18343,0.18601,0.1845,0.18355,0.1841,0.18601,0.1839,0.18692,0.18619,0.18473,0.18508,0.13073,0.11696,0.13137,0.18892,0.46394,0.48582,0.46317,0.48358,0.47557,0.49085,0.45854,0.34485,0.3191,0.34701,0.32758,0.35445,0.33408,0.31027,0.33804,0.33526,0.34054,0.32313,0.18567,0.18886,0.18765,0.18667,0.18688,0.18797,0.1872,0.18504,0.18497,0.18448,0.18635,0.11121,0.12659,0.12649,0.12676,0.12675,0.13021,0.18879,0.44105,0.46668,0.48472,0.46997,0.45877,0.46176,0.4884,0.32756,0.35113,0.30982,0.34105,0.32335,0.32791,0.32736,0.32514,0.34667,0.3239,0.29652,0.18487,0.18653,0.18703,0.18621,0.18429,0.19113,0.18679,0.18645,0.18838,0.12639,0.1275,0.13794,0.12665,0.12752,0.12623,0.12786,0.13203,0.1267,0.18716,0.48738,0.4663,0.50042,0.50561,0.45569,0.446,0.47367,0.31088,0.32642,0.32136,0.34475,0.33767,0.33562,0.33644,0.30165,0.33024,0.32947,0.32573,0.28757,0.18574,0.18841,0.18911,0.18929,0.18686,0.19103,0.11992,0.12713,0.13111,0.12741,0.14058,0.12729,0.12217,0.12895,0.12883,0.14103,0.1288,0.12857,0.47044,0.48358,0.44577,0.50836,0.47537,0.47471,0.4577,0.31259,0.32393,0.3232,0.34033,0.33795,0.34406,0.35951,0.34402,0.35343,0.33125,0.32467,0.32462,0.19205,0.18609,0.18752,0.12408,0.14002,0.11794,0.11909,0.13085,0.12543,0.1272,0.12597,0.13022,0.12798,0.12719,0.13378,0.13021,0.1469,0.12785,0.46726,0.45674,0.47659,0.46545,0.47737,0.49745,0.51074,0.4626,0.47319,0.33693,0.32375,0.30563,0.3338,0.29341,0.32355,0.32777,0.3306,0.32499,0.34477,0.34904,0.12773,0.12825,0.12665,0.12564,0.12821,0.12648,0.12362,0.12805,0.13318,0.12589,0.11738,0.12812,0.12737,0.12644,0.12758,0.11446,0.12255,0.13015,0.4636,0.50268,0.49618,0.46295,0.47982,0.47557,0.49181,0.45033,0.47109,0.34741,0.31203,0.27806,0.21885,0.24613,0.24706,0.24242,0.2519,0.26989,0.231,0.25112,0.12966,0.13862,0.12064,0.11594,0.12593,0.14054,0.13156,0.12674,0.13302,0.11312,0.12561,0.12887,0.12531,0.12597,0.13143,0.1247,0.12707,0.12436,0.46586,0.46342,0.46023,0.51838,0.46941,0.43587,0.46837,0.43285,0.4771

4, 0.24705, 0.24218, 0.24221, 0.26751, 0.22598, 0.27121, 0.23064, 0.27391, 0.25  
6, 0.25365, 0.20574, 0.12603, 0.12899, 0.1372, 0.12727, 0.12612, 0.14245, 0.143  
88, 0.12715, 0.13846, 0.12924, 0.12587, 0.13124, 0.13707, 0.12055, 0.11952, 0.1  
2655, 0.12213, 0.12733, 0.4888, 0.45136, 0.48708, 0.49376, 0.50407, 0.48354, 0.  
45859, 0.2743, 0.2778, 0.32201, 0.23652, 0.24739, 0.25235, 0.24771, 0.22901, 0.  
24131, 0.24583, 0.25074, 0.24407, 0.25362, 0.12769, 0.12574, 0.13384, 0.12123,  
0.12779, 0.12516, 0.12767, 0.14229, 0.12757, 0.12783, 0.12007, 0.13062, 0.1246  
9, 0.12681, 0.12122, 0.12173, 0.1233, 0.1367, 0.48943, 0.46736, 0.48762, 0.4990  
6, 0.48612, 0.4684, 0.27562, 0.28921, 0.28035, 0.25462, 0.26979, 0.25874, 0.246  
6, 0.23896, 0.25374, 0.26658, 0.2507, 0.25306, 0.24657, 0.27708, 0.12639, 0.128  
94, 0.12656, 0.12613, 0.12081, 0.12621, 0.12335, 0.12474, 0.13078, 0.1311, 0.14  
118, 0.12687, 0.12767, 0.12249, 0.13813, 0.13162, 0.11738, 0.12667, 0.44135, 0.  
45983, 0.47884, 0.45846, 0.47913, 0.29438, 0.28008, 0.25523, 0.28983, 0.25973,  
0.20397, 0.23089, 0.25451, 0.24679, 0.24716, 0.25149, 0.25223, 0.23761, 0.2478  
8, 0.25203, 0.13818, 0.11645, 0.13808, 0.12432, 0.11408, 0.12737, 0.12322, 0.13  
824, 0.11907, 0.12642, 0.12005, 0.12863, 0.12828, 0.1264, 0.12884, 0.13535, 0.1  
2084, 0.12798, 0.50391, 0.46689, 0.48579, 0.27878, 0.26704, 0.27308, 0.28895, 0  
.27206, 0.30029, 0.24206, 0.3, 0.26959, 0.2454, 0.24236, 0.26643, 0.22035, 0.24  
737, 0.25343, 0.21853, 0.22821, 0.12485, 0.12824, 0.11755, 0.12687, 0.1201, 0.1  
3282, 0.13423, 0.12684, 0.12798, 0.11811, 0.12664, 0.12846, 0.12854, 0.13751, 0  
.11975, 0.12594, 0.12731, 0.12784, 0.47017, 0.28132, 0.29323, 0.25919, 0.2443,  
0.28726, 0.25935, 0.27535, 0.26984, 0.27173, 0.24193, 0.24504, 0.25246, 0.2389  
2, 0.26194, 0.24123, 0.24416, 0.24863, 0.24648, 0.12655, 0.12826, 0.12667, 0.12  
593, 0.12477, 0.11998, 0.12475, 0.12674, 0.13074, 0.12997, 0.12584, 0.12581, 0.  
12403, 0.13219, 0.14689, 0.12641, 0.11538, 0.06704, 0.26984, 0.29083, 0.26417,  
0.25742, 0.26381, 0.2346, 0.25812, 0.29407, 0.27157, 0.33092, 0.27529, 0.19499  
, 0.20671, 0.24974, 0.24456, 0.22996, 0.23602, 0.22322, 0.23954, 0.12678, 0.127  
7, 0.12933, 0.12794, 0.12489, 0.11072, 0.1277, 0.11962, 0.13156, 0.12464, 0.134  
84, 0.12439, 0.12432, 0.13054, 0.12712, 0.12708, 0.12659, 0.067934, 0.30245, 0.  
25126, 0.27928, 0.29978, 0.29238, 0.24452, 0.25558, 0.23105, 0.23783, 0.27721,  
0.22539, 0.281, 0.19386, 0.25251, 0.23911, 0.24895, 0.25186, 0.26931, 0.12318,  
0.12633, 0.12694, 0.12938, 0.12707, 0.11387, 0.14064, 0.12972, 0.13258, 0.1288  
, 0.13199, 0.12733, 0.12667, 0.1282, 0.12009, 0.12792, 0.12465, 0.1277, 0.06646  
2, 0.28414, 0.33152, 0.25381, 0.27899, 0.28699, 0.24855, 0.25696, 0.26591, 0.24  
516, 0.27881, 0.24824, 0.24079, 0.22196, 0.24407, 0.25648, 0.24645, 0.24246, 0.  
22323, 0.13592, 0.12736, 0.12535, 0.12649, 0.12567, 0.14427, 0.12208, 0.12576,  
0.12532, 0.12863, 0.12616, 0.12673, 0.11885, 0.12237, 0.12015, 0.12891, 0.1367  
4, 0.068058, 0.069057, 0.067735, 0.27857, 0.2749, 0.27738, 0.2731, 0.273, 0.270  
5, 0.26039, 0.2583, 0.2708, 0.21461, 0.22722, 0.24917, 0.21972, 0.25015, 0.2609  
2, 0.11041, 0.131, 0.1318, 0.12763, 0.12751, 0.12768, 0.12244, 0.13066, 0.11813  
, 0.13397, 0.12719, 0.11908, 0.12411, 0.12645, 0.12216, 0.11997, 0.12799, 0.124  
84, 0.06725, 0.068652, 0.066201, 0.070092, 0.1934, 0.2638, 0.24389, 0.22167, 0.  
25655, 0.26628, 0.32011, 0.31442, 0.31056, 0.26958, 0.22068, 0.24109, 0.14028,  
0.1228, 0.11434, 0.12041, 0.13784, 0.13711, 0.13947, 0.11986, 0.13298, 0.12862  
, 0.13492, 0.13436, 0.12552, 0.13844, 0.12729, 0.12792, 0.12999, 0.13186, 0.116  
45, 0.12859, 0.066334, 0.067484, 0.068909, 0.066576, 0.066967, 0.067198, 0.266  
99, 0.26406, 0.3038, 0.28172, 0.2495, 0.27787, 0.25459, 0.27674, 0.1191, 0.1128  
7, 0.10642, 0.12761, 0.12551, 0.12562, 0.12591, 0.13004, 0.10529, 0.12738, 0.13  
378, 0.15564, 0.12574, 0.12633, 0.14725, 0.13023, 0.12714, 0.10926, 0.12712, 0.  
12419, 0.12503, 0.1223, 0.12954, 0.066092, 0.068124, 0.065086, 0.068595, 0.065  
822, 0.067494, 0.28814, 0.27487, 0.30025, 0.26963, 0.28771, 0.068675, 0.066263  
, 0.12864, 0.12753, 0.12721, 0.12683, 0.12813, 0.1278, 0.12547, 0.13316, 0.1233

9,0.12075,0.12435,0.12372,0.1301,0.12721,0.1214,0.12513,0.12851,0.1248  
4,0.12745,0.13147,0.13014,0.068249,0.066525,0.065333,0.06856,0.066353,  
0.067555,0.069207,0.069988,0.067065,0.066332,0.27078,0.24542,0.066034,  
0.066606,0.067035,0.068707,0.13479,0.10824,0.12762,0.12822,0.13009,0.1  
3719,0.12642,0.12621,0.12804,0.12203,0.11974,0.1389,0.13218,0.1248,0.1  
2857,0.12728,0.12034,0.13609,0.13282,0.067986,0.069346,0.068968,0.0695  
21,0.067646,0.066014,0.065492,0.067688,0.066969,0.066044,0.06681,0.068  
978,0.068385,0.069382,0.070123,0.066127,0.067386,0.12497,0.13181,0.118  
37,0.11333,0.12708,0.12334,0.12973,0.11914,0.12595,0.12602,0.1253,0.13  
064,0.11983,0.12821,0.13113,0.12792,0.067724,0.068071,0.067393,0.06771  
3,0.069441,0.06812,0.066156,0.06947,0.069517,0.069301,0.06772,0.0681,0  
.068414,0.066393,0.069487,0.067367,0.06881,0.068191,0.071198,0.11957,0  
.1225,0.14302,0.12801,0.1195,0.12683,0.12693,0.13111,0.12215,0.13062,0  
.13087,0.13226,0.11835,0.069261,0.068969,0.067343,0.0653,0.068428,0.06  
6586,0.067996,0.068999,0.0674,0.066805,0.068718,0.072311,0.066626,0.06  
6328,0.069099,0.066683,0.070201,0.069042,0.06718,0.068405,0.066924,0.1  
2373,0.12835,0.13378,0.12832,0.13468,0.11668,0.12134,0.12663,0.12573,0  
.067076,0.067757,0.068802,0.069328,0.069257,0.06684,0.067921,0.066743,  
0.06844,0.069311,0.069494,0.068176,0.069509,0.067171,0.065107,0.067604  
,0.069856,0.065019,0.068425,0.067371,0.068128,0.067421,0.067665,0.0680  
25,0.069992,0.12126,0.13623,0.12462,0.11445,0.066747,0.066518,0.067564  
,0.06835,0.065366,0.064357,0.067618,0.066161,0.068313,0.068373,0.06758  
,0.065991,0.068379,0.067678,0.070251,0.068621,0.066403,0.066752,0.0650  
17,0.066951,0.069115,0.066231,0.068742,0.067152,0.069735,0.071317,0.07  
0872,0.069963,0.064983,0.069933,0.067722,0.065239,0.070824,0.069415,0.  
06863,0.06759,0.068038,0.066312,0.068023,0.069482,0.068627,0.068857,0.  
068383,0.068736,0.067211,0.06935,0.067949,0.06736,0.067247,0.069001,0.  
065236,0.069102,0.065779,0.067677,0.066844,0.068019,0.067862,0.067056,  
0.068189,0.065727,0.06783,0.067122,0.070525,0.068445,0.068664,0.068284  
,0.0679,0.067473,0.067484,0.067726,0.069859,0.072441,0.066006,0.070089  
,0.065865,0.067536,0.068772,0.068878,0.065519,0.067465,0.065282,0.0682  
06,0.068527,0.065321,0.067531,0.067236,0.066288,0.068615,0.067265,0.06  
7789,0.066156,0.066229,0.068098,0.067133,0.068913,0.065725,0.067937,0.  
068513,0.069089,0.068816,0.068596,0.068904,0.068357,0.066936,0.066455,  
0.067751,0.068212,0.067041,0.068331,0.065338,0.066681,0.068081,0.06847  
,0.068252,0.068287,0.066778,0.066544,0.068393,0.06752,0.066539,0.06511  
2,0.06727,0.067969,0.068366,0.066642,0.069382,0.067964,0.06896,0.06996  
,0.066471,0.065918,0.068529,0.065606,0.068887,0.066734,0.068169,0.0664  
79,0.067553,0.069678,0.065313,0.066186,0.066712,0.066583,0.065773,0.06  
6428,0.069142,0.069802,0.068465,0.067879,0.069362,0.067719,0.068544,0.  
068162,0.067665,0.069832,0.070768,0.06503,0.068522,0.066651,0.066709,0  
.067033,0.068991,0.068762,0.067089,0.067426,0.068899,0.06804,0.06787,0  
.067843,0.068276,0.067331,0.06767,0.068284,0.067902,0.066465,0.069451,  
0.065283,0.06748,0.066596,0.069334,0.068073,0.066934,0.067269,0.069184  
,0.067069,0.066833,0.066359,0.070748,0.066824,0.067414,0.069201,0.0677  
64,0.067578,0.06741,0.071673  
0.1856,0.19104,0.18884,0.19311,0.18821,0.19192,0.18863,0.1917,0.1913,0  
.19254,0.19159,0.19224,0.18935,0.19166,0.19163,0.19003,0.19003,0.19359  
,0.19235,0.1888,0.3384,0.3042,0.35904,0.29631,0.19044,0.19382,0.19216,  
0.19119,0.187,0.1941,0.18989,0.18988,0.19049,0.18892,0.19445,0.18919,0  
.18654,0.18897,0.18897,0.41802,0.30669,0.31409,0.31392,0.30969,0.31418  
,0.31916,0.18808,0.1864,0.19272,0.19187,0.18963,0.19065,0.18776,0.1910

2,0.18926,0.19067,0.18923,0.18984,0.19086,0.1919,0.19223,0.4728,0.4297  
5,0.29526,0.33263,0.28258,0.31509,0.3181,0.2956,0.30434,0.29465,0.1885  
4,0.19157,0.1923,0.1912,0.19011,0.18902,0.18968,0.19022,0.1939,0.19131  
,0.1889,0.18933,0.1914,0.19113,0.19207,0.43037,0.40899,0.42434,0.25572  
,0.35935,0.32025,0.31296,0.32937,0.30406,0.35105,0.3274,0.30748,0.1915  
6,0.18937,0.1909,0.18894,0.19362,0.19055,0.19018,0.18956,0.19137,0.193  
85,0.19018,0.19215,0.19145,0.19151,0.18791,0.19008,0.40706,0.45386,0.4  
2622,0.43859,0.31397,0.31523,0.28202,0.31892,0.29519,0.30662,0.30945,0  
.31387,0.3296,0.31985,0.19126,0.19292,0.19245,0.19133,0.18807,0.19037,  
0.19082,0.19028,0.19212,0.19307,0.18969,0.18995,0.19106,0.19377,0.1873  
9,0.18795,0.41621,0.42204,0.43736,0.4348,0.40767,0.41178,0.30537,0.308  
33,0.29664,0.3069,0.30871,0.34032,0.29213,0.31153,0.29945,0.31016,0.19  
132,0.19176,0.18876,0.18908,0.18882,0.19153,0.18946,0.19198,0.19124,0.  
19289,0.19232,0.1929,0.19105,0.18831,0.1927,0.19158,0.18989,0.45384,0.  
45544,0.44487,0.44485,0.41701,0.46131,0.32019,0.2862,0.31709,0.33014,0  
.3388,0.34051,0.3032,0.30836,0.31059,0.3012,0.31305,0.1902,0.19141,0.1  
8743,0.1889,0.18978,0.18841,0.18849,0.18947,0.1873,0.19157,0.18994,0.1  
8889,0.18857,0.1289,0.11355,0.12926,0.1925,0.41642,0.44912,0.42851,0.4  
4569,0.45121,0.44121,0.42496,0.32165,0.30358,0.3326,0.30955,0.34376,0.  
31139,0.29547,0.31774,0.31218,0.3197,0.30168,0.18908,0.19329,0.19117,0  
.19131,0.19083,0.19126,0.19265,0.18848,0.18841,0.1884,0.1907,0.10729,0  
.12462,0.1245,0.12412,0.12398,0.12848,0.1928,0.40783,0.42301,0.43447,0  
.43166,0.42481,0.41838,0.44629,0.30646,0.33407,0.29746,0.32111,0.30288  
,0.31446,0.31106,0.31397,0.32824,0.30161,0.27925,0.18946,0.19185,0.191  
4,0.18952,0.18744,0.19439,0.1921,0.19199,0.19352,0.1238,0.1252,0.13626  
,0.12364,0.12474,0.1232,0.12559,0.13003,0.12401,0.19079,0.44112,0.4411  
8,0.45178,0.4686,0.42179,0.40978,0.43393,0.2998,0.3052,0.30702,0.32814  
,0.32021,0.31561,0.31359,0.28769,0.31493,0.31105,0.30461,0.27533,0.191  
16,0.19213,0.19272,0.1937,0.19039,0.19519,0.11709,0.12467,0.1284,0.125  
01,0.13936,0.12508,0.11916,0.12599,0.12604,0.14069,0.12712,0.1266,0.42  
986,0.43403,0.4076,0.46897,0.43457,0.43913,0.41366,0.29299,0.30682,0.3  
0793,0.31933,0.31901,0.32595,0.33651,0.32124,0.32673,0.31426,0.31282,0  
.29869,0.19396,0.19123,0.19229,0.12178,0.13852,0.11429,0.11575,0.12799  
,0.12356,0.12548,0.12431,0.12825,0.12519,0.1247,0.13216,0.12851,0.1468  
1,0.12602,0.4275,0.42097,0.42337,0.42125,0.41735,0.44841,0.47474,0.423  
65,0.4308,0.31689,0.30617,0.29165,0.31094,0.28165,0.30563,0.30709,0.31  
554,0.30864,0.32364,0.33283,0.12525,0.12564,0.12321,0.12323,0.12621,0.  
1246,0.12019,0.12608,0.13114,0.1234,0.11303,0.12564,0.12531,0.12352,0.  
12494,0.11029,0.1192,0.12885,0.43245,0.45681,0.46187,0.42065,0.4285,0.  
43716,0.46439,0.40373,0.43238,0.32478,0.29799,0.25543,0.20879,0.2366,0  
.23117,0.22608,0.23173,0.25392,0.21477,0.23649,0.12664,0.13762,0.11751  
,0.1121,0.12358,0.1393,0.12853,0.12432,0.13132,0.1085,0.12237,0.1258,0  
.12291,0.12417,0.12875,0.1226,0.12466,0.12142,0.4273,0.41918,0.42446,0  
.48371,0.41671,0.40216,0.42056,0.40346,0.42511,0.22371,0.22785,0.22703  
,0.25224,0.21313,0.25252,0.21462,0.25739,0.24212,0.24207,0.19863,0.123  
31,0.12661,0.13565,0.12532,0.12313,0.14181,0.14286,0.12534,0.13752,0.1  
273,0.12357,0.12915,0.13602,0.11767,0.11633,0.12399,0.11868,0.12466,0.  
44635,0.41368,0.44512,0.44766,0.46572,0.45064,0.39839,0.24406,0.25665,  
0.29893,0.22099,0.23222,0.23814,0.22977,0.21596,0.22188,0.23141,0.2334  
5,0.22759,0.23837,0.12513,0.12408,0.13277,0.11857,0.12484,0.12304,0.12  
509,0.14124,0.12517,0.12548,0.11724,0.12847,0.12159,0.12414,0.11816,0.  
11812,0.12131,0.13561,0.44189,0.42185,0.44846,0.45967,0.45605,0.41997,



0.24304,0.26503,0.25676,0.22415,0.24121,0.24205,0.23027,0.22097,0.2338  
,0.24859,0.23642,0.24435,0.22604,0.2618,0.12384,0.12624,0.124,0.12373,  
0.11742,0.12386,0.12087,0.12124,0.12863,0.12917,0.14125,0.12449,0.1253  
8,0.11915,0.13701,0.12947,0.11431,0.1234,0.38946,0.4326,0.44204,0.4340  
4,0.44283,0.26167,0.24739,0.23008,0.2565,0.23571,0.18596,0.21781,0.241  
89,0.23279,0.23171,0.23422,0.23704,0.22272,0.2342,0.23423,0.13766,0.11  
273,0.13689,0.12142,0.11004,0.12435,0.12053,0.13738,0.11552,0.12369,0.  
11768,0.12593,0.12557,0.12384,0.1271,0.13373,0.1174,0.12581,0.46399,0.  
42382,0.44506,0.25337,0.24865,0.2493,0.26501,0.24663,0.27656,0.21335,0.  
.27242,0.24677,0.22467,0.22638,0.25233,0.20816,0.231,0.2372,0.20589,0.  
21628,0.12249,0.12596,0.11433,0.12483,0.11768,0.13113,0.133,0.12528,0.  
12484,0.11452,0.12435,0.12521,0.12637,0.13661,0.11587,0.12415,0.12459,  
0.12507,0.42643,0.25332,0.27011,0.23813,0.21513,0.26381,0.23615,0.2457  
2,0.24241,0.247,0.22792,0.23622,0.23294,0.22939,0.24513,0.21834,0.2323  
6,0.23137,0.23115,0.12422,0.12514,0.12479,0.12322,0.1219,0.11748,0.121  
92,0.12517,0.12843,0.1277,0.12396,0.12288,0.12151,0.13009,0.14592,0.12  
373,0.1114,0.058271,0.24152,0.25171,0.23863,0.23516,0.24531,0.21304,0.  
2398,0.26961,0.24371,0.30951,0.25898,0.18277,0.19667,0.23334,0.22679,0.  
.21382,0.21385,0.21419,0.21889,0.12433,0.12501,0.12718,0.12486,0.12254  
,0.10582,0.12571,0.117,0.12916,0.12172,0.13296,0.12158,0.12202,0.12874  
,0.12485,0.12461,0.12417,0.059136,0.27644,0.23212,0.24566,0.28079,0.26  
012,0.23147,0.23554,0.20706,0.20986,0.25435,0.21217,0.26285,0.1823,0.2  
3324,0.22458,0.23374,0.23363,0.24868,0.12063,0.12393,0.12454,0.12693,0.  
.12502,0.11019,0.13945,0.12745,0.12977,0.12608,0.12958,0.12405,0.12392  
,0.1257,0.11742,0.12575,0.12222,0.12485,0.057878,0.25328,0.29789,0.228  
84,0.25511,0.25571,0.22656,0.23195,0.23902,0.22725,0.25436,0.23048,0.2  
2638,0.21057,0.23195,0.24152,0.23953,0.22119,0.21238,0.13559,0.125,0.1  
2246,0.12389,0.1235,0.14432,0.11903,0.12349,0.12253,0.126,0.12425,0.12  
343,0.11493,0.11946,0.11779,0.12598,0.13579,0.058207,0.059871,0.058451  
,0.25136,0.24894,0.25664,0.24547,0.24814,0.24897,0.2302,0.23248,0.2456  
6,0.20033,0.21271,0.22851,0.20676,0.23885,0.24344,0.10616,0.12827,0.13  
021,0.12459,0.12517,0.12449,0.11913,0.12828,0.11495,0.13237,0.12471,0.  
11651,0.12145,0.12318,0.11929,0.11741,0.1251,0.12197,0.058868,0.059576  
,0.057383,0.061015,0.17178,0.24485,0.21958,0.20554,0.23536,0.23258,0.2  
9512,0.28847,0.2807,0.2434,0.21042,0.2248,0.13883,0.11962,0.11109,0.11  
757,0.13693,0.13621,0.1389,0.11667,0.13015,0.12658,0.13415,0.13344,0.1  
2347,0.13656,0.12491,0.12603,0.12773,0.1294,0.11316,0.12613,0.058883,0.  
.058755,0.059395,0.058609,0.05799,0.058189,0.24475,0.23976,0.28671,0.2  
4907,0.22367,0.25014,0.23093,0.25226,0.11653,0.10923,0.10144,0.12537,0.  
.12338,0.12344,0.12298,0.12771,0.10101,0.1252,0.13187,0.15775,0.12343,  
0.12422,0.14657,0.1273,0.12555,0.10418,0.12427,0.12117,0.12188,0.11951  
,0.12778,0.057942,0.059593,0.056597,0.059536,0.057407,0.057601,0.26536  
,0.25001,0.27096,0.24923,0.26164,0.058484,0.057688,0.12585,0.1242,0.12  
5,0.12407,0.12523,0.12528,0.1226,0.1306,0.12121,0.11778,0.1222,0.12091  
,0.12825,0.12527,0.11863,0.12288,0.12628,0.12199,0.12562,0.12944,0.127  
54,0.059153,0.058226,0.055806,0.059388,0.057105,0.060071,0.060245,0.06  
0833,0.058423,0.057098,0.24644,0.22338,0.057102,0.058442,0.058646,0.06  
0197,0.13325,0.10399,0.12565,0.12547,0.12757,0.13492,0.12425,0.12298,0.  
.12553,0.1193,0.11715,0.13828,0.13001,0.122,0.12624,0.12384,0.11737,0.  
13383,0.13077,0.0584,0.060545,0.060284,0.061015,0.059585,0.057925,0.05  
691,0.058394,0.05878,0.057084,0.057887,0.059772,0.059883,0.060518,0.06  
1303,0.057514,0.057006,0.12234,0.1296,0.11528,0.10904,0.12487,0.12069,

0.12792,0.11525,0.1233,0.1238,0.12283,0.1282,0.11619,0.12502,0.12963,0.  
.1253,0.059615,0.058776,0.058675,0.059434,0.061246,0.059573,0.057033,0.  
.06083,0.061369,0.060581,0.059271,0.059583,0.059316,0.057632,0.061989,  
0.059324,0.058887,0.058609,0.062432,0.1165,0.11961,0.1421,0.12573,0.11  
621,0.12452,0.12491,0.12899,0.11851,0.12808,0.12896,0.13025,0.11477,0.  
059194,0.059582,0.058972,0.057221,0.059785,0.058476,0.059217,0.06047,0.  
.05908,0.058356,0.059853,0.062346,0.057755,0.058683,0.060493,0.058468,  
0.060921,0.060144,0.058236,0.059963,0.057587,0.12029,0.12621,0.13193,0.  
.12638,0.13365,0.11307,0.11831,0.12393,0.12353,0.059175,0.059174,0.059  
49,0.060857,0.060051,0.058227,0.058165,0.057985,0.059502,0.06073,0.060  
17,0.058629,0.060939,0.059146,0.056515,0.058872,0.060674,0.05597,0.059  
46,0.058532,0.059703,0.059279,0.05989,0.058135,0.061319,0.11825,0.1353  
,0.12242,0.11073,0.057255,0.05817,0.058714,0.059581,0.057233,0.057094,  
0.058193,0.058022,0.059221,0.059543,0.059143,0.056894,0.059513,0.05848  
,0.060785,0.058549,0.058317,0.058566,0.056414,0.058279,0.060381,0.0569  
39,0.059729,0.058073,0.060705,0.061936,0.062717,0.06069,0.056334,0.061  
239,0.059296,0.056345,0.06196,0.06052,0.059951,0.058336,0.058343,0.058  
152,0.059944,0.060201,0.059724,0.059701,0.060111,0.059805,0.05845,0.06  
0981,0.059917,0.058672,0.05826,0.059698,0.056436,0.060661,0.057497,0.0  
57904,0.058542,0.059218,0.059413,0.058773,0.060963,0.05802,0.059171,0.  
058802,0.060885,0.059585,0.060891,0.059619,0.058192,0.058849,0.058781,  
0.058638,0.060415,0.063639,0.058208,0.061392,0.056631,0.058853,0.06010  
6,0.060015,0.057284,0.058406,0.056101,0.058886,0.060204,0.05777,0.0587  
64,0.058691,0.057692,0.058916,0.058557,0.059159,0.057645,0.057878,0.05  
9043,0.058888,0.059826,0.057465,0.058832,0.059771,0.060053,0.06026,0.0  
59332,0.059948,0.059934,0.058376,0.05829,0.059955,0.059163,0.058469,0.  
060099,0.05762,0.057478,0.059239,0.05907,0.059065,0.059401,0.058322,0.  
057194,0.060407,0.059125,0.05761,0.056139,0.058668,0.058483,0.059554,0  
.057856,0.060288,0.058103,0.060356,0.061175,0.057604,0.057139,0.059824  
,0.057618,0.059683,0.05857,0.059193,0.058274,0.057805,0.061069,0.05672  
8,0.058224,0.057792,0.057849,0.05704,0.057819,0.059765,0.060828,0.0597  
66,0.059463,0.060335,0.058574,0.059022,0.059897,0.058673,0.062036,0.06  
1306,0.056998,0.060341,0.058325,0.057439,0.058661,0.060707,0.059712,0.  
059719,0.058792,0.059159,0.059212,0.059,0.058495,0.060361,0.058728,0.0  
58846,0.059074,0.059601,0.057318,0.060218,0.056834,0.058454,0.058127,0  
.060205,0.059421,0.058647,0.05861,0.06091,0.058534,0.05948,0.058364,0.  
060974,0.057867,0.059657,0.05998,0.058955,0.059393,0.05817,0.063246  
0.18848,0.19252,0.19131,0.19497,0.19216,0.19475,0.19349,0.19434,0.1944  
5,0.19498,0.19439,0.19462,0.19108,0.19514,0.194,0.19314,0.19402,0.197,  
0.19464,0.19158,0.33459,0.28846,0.34281,0.28196,0.19348,0.19615,0.1945  
9,0.19399,0.19012,0.1961,0.1919,0.19254,0.19205,0.19108,0.19717,0.1917  
9,0.1891,0.1914,0.19282,0.40092,0.28814,0.30438,0.29496,0.29698,0.3007  
7,0.30332,0.19163,0.18965,0.19562,0.19578,0.19191,0.19427,0.19081,0.19  
387,0.1939,0.19316,0.192,0.19359,0.19414,0.1961,0.19597,0.43651,0.3836  
,0.28206,0.32151,0.27123,0.30456,0.30716,0.28706,0.29219,0.28527,0.192  
97,0.1944,0.19537,0.19403,0.19305,0.19268,0.1933,0.19325,0.19527,0.194  
77,0.19248,0.19145,0.1929,0.1954,0.19513,0.40094,0.37548,0.40922,0.247  
38,0.33891,0.30934,0.30252,0.31316,0.29276,0.33005,0.32019,0.30219,0.1  
9497,0.19333,0.19273,0.19173,0.19699,0.19429,0.19436,0.19318,0.19507,0  
.19624,0.19301,0.19448,0.19469,0.19456,0.19124,0.19396,0.38763,0.42722  
,0.40706,0.4265,0.30088,0.30089,0.2717,0.30693,0.28741,0.29118,0.29472  
,0.30301,0.31278,0.30665,0.19488,0.19528,0.1953,0.194,0.18976,0.1927,0

.1946,0.19225,0.19669,0.19605,0.19251,0.19381,0.1939,0.19796,0.19156,0.19087,0.3797,0.3861,0.4162,0.40518,0.38746,0.39188,0.29583,0.29609,0.28821,0.3023,0.29627,0.3273,0.2839,0.30296,0.28681,0.30019,0.19292,0.1939,0.19167,0.19245,0.19231,0.19508,0.1925,0.19573,0.19338,0.19723,0.19599,0.19742,0.19459,0.19052,0.19494,0.19469,0.19333,0.42753,0.42958,0.41676,0.41724,0.40614,0.4355,0.306,0.27869,0.30672,0.32092,0.31661,0.32786,0.29319,0.29384,0.29964,0.28957,0.29891,0.19285,0.19481,0.18964,0.19196,0.19322,0.19056,0.19074,0.19275,0.18988,0.19463,0.19258,0.19084,0.19248,0.12757,0.1111,0.12815,0.19507,0.38982,0.41927,0.38817,0.42053,0.4261,0.41769,0.41014,0.30964,0.28663,0.31666,0.29838,0.33515,0.29163,0.28559,0.30154,0.3,0.30499,0.28881,0.19143,0.19497,0.19539,0.19529,0.19273,0.19362,0.19522,0.19125,0.19094,0.19284,0.19288,0.10368,0.12343,0.12319,0.12281,0.12261,0.12739,0.19538,0.38204,0.4018,0.41973,0.40465,0.40773,0.39639,0.41182,0.29732,0.31822,0.28791,0.3079,0.28754,0.30307,0.30851,0.30073,0.31501,0.28651,0.27252,0.1927,0.19532,0.19519,0.19249,0.18923,0.19635,0.19503,0.19489,0.19732,0.12223,0.12427,0.13471,0.12238,0.12296,0.12199,0.1234,0.12929,0.12272,0.19268,0.40867,0.40427,0.43876,0.44289,0.38772,0.39086,0.41646,0.29304,0.2952,0.3017,0.31836,0.29943,0.31198,0.3026,0.27817,0.30191,0.2954,0.29356,0.26865,0.19352,0.19375,0.19575,0.19601,0.19367,0.19689,0.11458,0.12312,0.12685,0.12355,0.13862,0.12457,0.11704,0.12451,0.12519,0.13992,0.12586,0.12448,0.40237,0.41478,0.40022,0.442,0.40414,0.41553,0.38992,0.28809,0.29293,0.2999,0.30452,0.30551,0.32162,0.32043,0.31384,0.30737,0.30816,0.30746,0.29183,0.19655,0.19372,0.19587,0.11927,0.13909,0.11239,0.11359,0.12646,0.12143,0.12352,0.12291,0.12713,0.12418,0.12342,0.13193,0.12729,0.14618,0.12519,0.39991,0.38568,0.40966,0.38341,0.39722,0.43107,0.44016,0.40644,0.40191,0.30059,0.29354,0.28407,0.29835,0.27125,0.29006,0.29983,0.30456,0.30071,0.3088,0.31783,0.12328,0.12422,0.12126,0.1214,0.12461,0.12251,0.11844,0.12522,0.12931,0.12125,0.11074,0.12371,0.12381,0.12226,0.12395,0.1074,0.1173,0.12731,0.41116,0.42159,0.43891,0.40862,0.39168,0.42055,0.43447,0.38266,0.39652,0.31568,0.2842,0.2447,0.20124,0.22576,0.22509,0.21379,0.2175,0.23973,0.20353,0.22248,0.12452,0.13684,0.11583,0.10971,0.12238,0.13826,0.12742,0.12194,0.13047,0.1057,0.12004,0.12445,0.12074,0.12261,0.12768,0.12074,0.12265,0.12113,0.40166,0.39648,0.39576,0.45008,0.39993,0.3919,0.41523,0.38248,0.38827,0.20916,0.22602,0.21849,0.24192,0.2064,0.24182,0.20646,0.24288,0.23549,0.23003,0.19498,0.12249,0.12525,0.13426,0.12371,0.12095,0.14095,0.14196,0.12273,0.13612,0.12546,0.12197,0.12789,0.13505,0.1158,0.11414,0.12316,0.11669,0.12336,0.41344,0.40059,0.42645,0.4168,0.42682,0.41412,0.39423,0.22645,0.23605,0.28951,0.20579,0.22326,0.22503,0.21907,0.20701,0.20762,0.21768,0.22469,0.21712,0.22508,0.12279,0.12245,0.13233,0.1164,0.12318,0.12155,0.12358,0.14135,0.12353,0.12351,0.11583,0.12688,0.12061,0.12299,0.116,0.11659,0.11946,0.13508,0.40961,0.39934,0.40738,0.44167,0.42439,0.39044,0.22941,0.24868,0.23782,0.20811,0.22033,0.22998,0.21265,0.21151,0.22296,0.23757,0.22652,0.2354,0.21685,0.25139,0.12172,0.12516,0.12177,0.12244,0.11493,0.12237,0.11875,0.11974,0.1279,0.12799,0.14121,0.12313,0.12381,0.1175,0.13537,0.12858,0.11287,0.12161,0.36651,0.41411,0.42687,0.40467,0.42477,0.2488,0.2347,0.21534,0.24911,0.22036,0.17258,0.20735,0.2309,0.22116,0.22088,0.22681,0.22953,0.20826,0.22303,0.21905,0.13748,0.11088,0.13675,0.11935,0.10758,0.12262,0.11885,0.13627,0.11318,0.12167,0.11524,0.12384,0.12324,0.12205,0.12588,0.13305,0.116,0.12384,0.4452,0.39409,0.41433,0.23375,0.23777,0.22896,0.24821,0.22938,0.25558,0.20016

,0.2566,0.23635,0.21896,0.21674,0.24334,0.19922,0.22423,0.22434,0.1970  
6,0.20684,0.12031,0.12403,0.11211,0.12312,0.1156,0.12985,0.13232,0.123  
83,0.12259,0.11211,0.12296,0.12355,0.12532,0.13547,0.1136,0.12318,0.12  
336,0.12339,0.39486,0.23792,0.24677,0.22465,0.20144,0.24605,0.21909,0.  
23407,0.21813,0.23724,0.21891,0.22505,0.21967,0.21503,0.23718,0.21017,  
0.2238,0.21985,0.22039,0.12276,0.12399,0.12352,0.1223,0.12083,0.11561,  
0.11954,0.1241,0.12766,0.12724,0.12171,0.12222,0.11968,0.1295,0.14536,  
0.12226,0.10853,0.052105,0.21775,0.24191,0.2215,0.22443,0.22707,0.1993  
6,0.22701,0.25546,0.22261,0.29129,0.24825,0.17638,0.18888,0.22258,0.21  
816,0.20588,0.20428,0.20207,0.21159,0.12277,0.12361,0.12564,0.12275,0.  
12117,0.10238,0.12352,0.11495,0.12723,0.11943,0.13216,0.12033,0.12084,  
0.12695,0.12306,0.12295,0.12275,0.053512,0.24834,0.2216,0.22563,0.2614  
6,0.23159,0.2161,0.214,0.1976,0.194,0.23725,0.20561,0.25112,0.17446,0.  
21852,0.21207,0.22376,0.22803,0.23865,0.11877,0.12117,0.12293,0.12588,  
0.12414,0.10756,0.1397,0.12588,0.12728,0.1237,0.12874,0.12326,0.1228,0.  
.12396,0.11568,0.12476,0.12025,0.123,0.051888,0.23567,0.27746,0.21707,  
0.24197,0.24754,0.21562,0.21941,0.2322,0.21677,0.23113,0.22158,0.21325  
,0.20218,0.22527,0.23048,0.2286,0.20923,0.20574,0.13484,0.12252,0.1208  
8,0.12237,0.12233,0.14466,0.1168,0.12233,0.12028,0.12482,0.12296,0.122  
44,0.11269,0.11797,0.11594,0.12375,0.13423,0.052061,0.053682,0.051942,  
0.23173,0.23056,0.24417,0.22681,0.23538,0.23453,0.21515,0.22041,0.2337  
9,0.19333,0.20047,0.21731,0.19306,0.22288,0.2359,0.10428,0.12657,0.129  
13,0.1231,0.12378,0.12333,0.11787,0.12665,0.11235,0.13067,0.12331,0.11  
437,0.1198,0.12126,0.11733,0.11569,0.12339,0.12021,0.052254,0.053377,0.  
.051435,0.05555,0.16014,0.235,0.20258,0.19429,0.22952,0.2208,0.27911,0.  
.27688,0.26143,0.23649,0.20722,0.21869,0.13874,0.118,0.10833,0.1156,0.  
13622,0.13524,0.13848,0.11514,0.12842,0.12493,0.13449,0.13244,0.12292,  
0.13552,0.12377,0.12425,0.12606,0.12858,0.1108,0.12449,0.052269,0.0535  
49,0.05382,0.052717,0.052181,0.052422,0.23004,0.22744,0.26516,0.23247,  
0.20589,0.22402,0.21302,0.22993,0.11337,0.10606,0.09758,0.12328,0.1226  
2,0.12164,0.12136,0.12698,0.098659,0.12351,0.13083,0.15849,0.12131,0.1  
2211,0.14649,0.12644,0.12371,0.10108,0.1232,0.12006,0.12071,0.1171,0.1  
2636,0.051755,0.052976,0.050534,0.053744,0.051197,0.051194,0.24372,0.2  
3936,0.24986,0.23344,0.24333,0.052408,0.052298,0.12414,0.12262,0.12354  
,0.1222,0.12301,0.12347,0.12091,0.13021,0.12006,0.11549,0.12042,0.1187  
2,0.12689,0.12327,0.1162,0.12214,0.12471,0.11947,0.12438,0.12859,0.125  
4,0.054051,0.052541,0.050035,0.05286,0.050498,0.05427,0.054232,0.05379  
8,0.052324,0.050503,0.2346,0.20822,0.051312,0.052525,0.052735,0.053907  
,0.13268,0.10101,0.12387,0.12505,0.12581,0.13402,0.12271,0.12091,0.123  
92,0.1178,0.11471,0.13744,0.12863,0.12054,0.12551,0.12234,0.11512,0.13  
232,0.12942,0.052219,0.054958,0.053169,0.053929,0.052249,0.052122,0.05  
1291,0.051843,0.052802,0.050793,0.051501,0.054316,0.052535,0.053846,0.  
054848,0.051299,0.051537,0.12029,0.12828,0.1129,0.10643,0.12375,0.1181  
1,0.12672,0.11337,0.12126,0.12239,0.12048,0.12716,0.11424,0.12286,0.12  
864,0.12412,0.052407,0.052499,0.052038,0.05338,0.055292,0.054298,0.051  
642,0.054163,0.054946,0.054789,0.053021,0.052638,0.053079,0.051381,0.0  
56049,0.052181,0.053063,0.052697,0.055788,0.11439,0.11686,0.14193,0.12  
41,0.11464,0.12303,0.12386,0.12768,0.11712,0.12626,0.12805,0.13026,0.1  
1217,0.052955,0.052918,0.052026,0.052194,0.053852,0.051713,0.053558,0.  
05404,0.05197,0.053495,0.053804,0.056027,0.050746,0.053454,0.053375,0.  
05291,0.054659,0.053525,0.052192,0.053957,0.051125,0.11812,0.12475,0.1  
3154,0.12467,0.13236,0.1106,0.11633,0.12188,0.12188,0.053434,0.053718,

0.053366,0.052968,0.053038,0.052097,0.051477,0.052091,0.053578,0.05479  
9,0.05345,0.052248,0.05509,0.052432,0.050168,0.052943,0.054411,0.05035  
1,0.052373,0.052902,0.053655,0.052598,0.053664,0.052835,0.054857,0.115  
8,0.1341,0.12143,0.10811,0.051048,0.052491,0.051822,0.052984,0.050709,  
0.051946,0.05178,0.052432,0.053086,0.053892,0.053579,0.051613,0.053701  
,0.051328,0.055584,0.052154,0.052756,0.051506,0.050589,0.05306,0.05419  
5,0.050141,0.053104,0.051681,0.054212,0.055282,0.056787,0.055037,0.050  
636,0.055658,0.054389,0.050117,0.055555,0.054794,0.053143,0.051678,0.0  
51394,0.052539,0.053003,0.052997,0.053563,0.053654,0.053801,0.053391,0  
.05271,0.054954,0.054743,0.052372,0.052911,0.054089,0.05099,0.054556,0  
.050989,0.051562,0.05294,0.053473,0.053538,0.053205,0.054632,0.051936,  
0.053195,0.052862,0.055085,0.053558,0.054808,0.054124,0.052091,0.05365  
9,0.053579,0.052566,0.054466,0.057309,0.052341,0.05436,0.050179,0.0530  
72,0.053619,0.054593,0.051843,0.052325,0.050755,0.053812,0.054024,0.05  
1473,0.053049,0.05183,0.052407,0.052967,0.052238,0.052449,0.050536,0.0  
52059,0.052948,0.050969,0.053531,0.051676,0.05291,0.053544,0.054001,0.  
054554,0.054493,0.054133,0.053425,0.051934,0.052245,0.054473,0.052774,  
0.053463,0.054866,0.051611,0.051686,0.053071,0.054382,0.053436,0.05347  
5,0.051825,0.051284,0.053862,0.052652,0.05241,0.050294,0.05223,0.05269  
7,0.053185,0.051816,0.053827,0.052834,0.053979,0.05451,0.050961,0.0507  
44,0.053667,0.051208,0.053595,0.052743,0.053101,0.053276,0.051328,0.05  
4135,0.050884,0.052446,0.051784,0.051975,0.051228,0.052397,0.053792,0.  
053952,0.05214,0.053029,0.054129,0.050931,0.052009,0.05331,0.052021,0.  
055508,0.055,0.052015,0.054011,0.052373,0.051565,0.052976,0.054642,0.0  
53926,0.053135,0.053629,0.053229,0.053452,0.053228,0.053161,0.053987,0  
.053242,0.052747,0.052598,0.052496,0.051652,0.053372,0.051188,0.052106  
,0.052202,0.053548,0.053733,0.053141,0.05309,0.054866,0.052829,0.05379  
4,0.051909,0.053887,0.051511,0.053581,0.052616,0.052565,0.053646,0.052  
203,0.056882  
0.1917,0.19468,0.19389,0.19657,0.19505,0.197,0.19593,0.1957,0.19608,0.  
19705,0.1964,0.19628,0.19431,0.19562,0.19693,0.19473,0.19648,0.19959,0  
.19713,0.1939,0.31754,0.28111,0.33465,0.26814,0.19692,0.19745,0.19679,  
0.19498,0.19304,0.19891,0.19419,0.19649,0.19352,0.19406,0.19961,0.1944  
5,0.1926,0.193,0.19589,0.37829,0.27396,0.29941,0.28446,0.28878,0.29136  
,0.29266,0.19361,0.19261,0.1988,0.19829,0.194,0.19734,0.19426,0.19649,  
0.19519,0.19631,0.19541,0.19635,0.19524,0.1979,0.19793,0.41431,0.37837  
,0.26891,0.31626,0.26857,0.28954,0.30318,0.28075,0.28405,0.28366,0.196  
2,0.19673,0.1978,0.19579,0.19601,0.19605,0.19647,0.19538,0.19794,0.196  
94,0.19376,0.19513,0.19439,0.19777,0.19838,0.37854,0.37028,0.388,0.247  
63,0.32797,0.2997,0.29134,0.30529,0.29165,0.31453,0.31152,0.29755,0.19  
896,0.19614,0.19602,0.19437,0.19763,0.19647,0.19595,0.19529,0.19829,0.  
19899,0.19574,0.19697,0.19767,0.19789,0.19372,0.19681,0.37265,0.41525,  
0.40717,0.40776,0.29686,0.30138,0.26811,0.30396,0.28002,0.2875,0.28609  
,0.29444,0.30608,0.29801,0.19702,0.19773,0.19759,0.19641,0.19276,0.194  
16,0.19725,0.19446,0.19781,0.19692,0.1957,0.19521,0.19482,0.19792,0.19  
35,0.19381,0.36163,0.37792,0.40587,0.39614,0.38514,0.38496,0.28631,0.2  
8464,0.27938,0.29638,0.28675,0.3083,0.27666,0.29895,0.27483,0.29872,0.  
19583,0.19636,0.19504,0.19452,0.19479,0.19719,0.19514,0.19757,0.19467,  
0.19749,0.19823,0.19848,0.19685,0.19407,0.19721,0.19754,0.19599,0.4128  
8,0.4077,0.39537,0.40571,0.38502,0.42742,0.2948,0.27181,0.30177,0.3143  
2,0.31253,0.31932,0.28532,0.28604,0.29294,0.27812,0.29762,0.19522,0.19  
653,0.19256,0.19346,0.19536,0.19293,0.19216,0.19635,0.19253,0.19721,0.

19529,0.19262,0.196,0.1269,0.10958,0.12735,0.19687,0.37042,0.39305,0.3  
7027,0.39806,0.41753,0.40105,0.38661,0.30181,0.27619,0.3099,0.2887,0.3  
28,0.28669,0.28175,0.2936,0.29202,0.29109,0.28145,0.19295,0.19821,0.19  
856,0.19715,0.19408,0.19553,0.19627,0.19345,0.19424,0.19683,0.19631,0.  
10233,0.122,0.12195,0.12242,0.12122,0.12672,0.19777,0.37461,0.39192,0.  
40933,0.3792,0.40005,0.37046,0.39574,0.29367,0.30435,0.28931,0.30182,0  
.28537,0.29498,0.29739,0.29286,0.30755,0.28673,0.26577,0.19449,0.19769  
,0.19715,0.19364,0.19232,0.19858,0.19617,0.19736,0.1992,0.12135,0.1234  
2,0.13525,0.12167,0.12252,0.12109,0.12243,0.12891,0.12152,0.19533,0.39  
19,0.39667,0.42237,0.42147,0.38766,0.37845,0.39549,0.28467,0.28222,0.2  
9537,0.31033,0.29486,0.30161,0.29917,0.27594,0.29356,0.28868,0.29095,0  
.26394,0.19526,0.19571,0.19755,0.19747,0.19527,0.19942,0.11352,0.12292  
,0.12622,0.12266,0.13747,0.12368,0.1158,0.12332,0.12358,0.13891,0.1249  
7,0.12423,0.38861,0.40118,0.39293,0.42768,0.38832,0.38952,0.37748,0.28  
247,0.28602,0.29359,0.29959,0.29669,0.31272,0.30701,0.30225,0.30228,0.  
30025,0.30255,0.28254,0.19756,0.19665,0.19811,0.11786,0.13994,0.11095,  
0.11183,0.12602,0.1202,0.12287,0.12261,0.12621,0.12301,0.12307,0.1313,  
0.1267,0.14661,0.12373,0.37547,0.36889,0.40633,0.36546,0.38896,0.40161  
,0.4394,0.38322,0.38802,0.28887,0.29435,0.27964,0.29513,0.27122,0.2781  
,0.29193,0.29606,0.29652,0.30439,0.30686,0.12108,0.12347,0.12103,0.119  
97,0.12318,0.12186,0.11842,0.12418,0.12887,0.1205,0.10831,0.12277,0.12  
281,0.12122,0.12318,0.10602,0.11641,0.12736,0.40135,0.41243,0.4294,0.3  
9489,0.37157,0.38929,0.41042,0.36126,0.37986,0.3065,0.27559,0.23438,0.  
20178,0.2197,0.21889,0.20748,0.21221,0.23299,0.19668,0.21562,0.12487,0  
.13602,0.11456,0.10817,0.12121,0.13827,0.12593,0.1206,0.12967,0.10446,  
0.11928,0.1237,0.11989,0.12185,0.12683,0.11877,0.12131,0.11946,0.37645  
,0.36734,0.39004,0.42845,0.39062,0.37999,0.39426,0.35177,0.38808,0.204  
93,0.22042,0.20887,0.23568,0.19924,0.24243,0.19853,0.23608,0.22841,0.2  
2166,0.19325,0.12132,0.1249,0.13411,0.12272,0.11998,0.14145,0.14135,0.  
12133,0.13625,0.1243,0.12133,0.1271,0.13437,0.11444,0.11217,0.12297,0.  
11477,0.12193,0.40013,0.38216,0.41034,0.39787,0.4079,0.40082,0.38604,0  
.21096,0.22203,0.27303,0.20068,0.21591,0.22102,0.2091,0.19894,0.20408,  
0.21162,0.21732,0.21568,0.21377,0.12129,0.12223,0.13153,0.11495,0.1224  
9,0.12066,0.12274,0.14032,0.12289,0.12281,0.11456,0.12579,0.11924,0.12  
205,0.11444,0.11532,0.11809,0.1346,0.37861,0.39909,0.39758,0.42052,0.4  
0068,0.37497,0.21607,0.23593,0.23376,0.1953,0.21644,0.22076,0.20383,0.  
2077,0.21312,0.23367,0.22132,0.22208,0.21197,0.24232,0.12113,0.12424,0  
.12091,0.12161,0.11333,0.121,0.11667,0.11878,0.12731,0.12683,0.14127,0  
.12211,0.12296,0.11531,0.13507,0.12827,0.11156,0.12134,0.35406,0.39887  
,0.4165,0.39312,0.41078,0.24283,0.22808,0.21026,0.2321,0.20774,0.16693  
,0.20408,0.22325,0.21275,0.21489,0.2203,0.2219,0.20261,0.22029,0.2159,  
0.13645,0.10985,0.13632,0.11802,0.10629,0.12194,0.11828,0.13656,0.1112  
9,0.12103,0.11457,0.12285,0.12175,0.12048,0.12554,0.13283,0.11451,0.12  
312,0.42268,0.368,0.39942,0.21614,0.23387,0.21627,0.23528,0.21563,0.23  
504,0.19684,0.23964,0.23156,0.21109,0.20612,0.23263,0.19874,0.21754,0.  
21882,0.18885,0.19653,0.11846,0.12311,0.11101,0.12211,0.11449,0.12913,  
0.13141,0.1233,0.12179,0.11024,0.12206,0.12314,0.12568,0.13521,0.11301  
,0.12258,0.12234,0.12224,0.38566,0.23127,0.23261,0.21735,0.19044,0.233  
33,0.20718,0.21399,0.19993,0.22404,0.21417,0.21894,0.21444,0.20526,0.2  
3616,0.20332,0.21663,0.21594,0.21334,0.12208,0.12273,0.12211,0.12145,0  
.12,0.11456,0.11764,0.12249,0.12692,0.1267,0.121,0.12123,0.11905,0.129  
49,0.14642,0.12086,0.10694,0.048003,0.21092,0.22991,0.21676,0.21243,0.

21327,0.19187,0.21992,0.25076,0.205,0.27917,0.24234,0.17568,0.17981,0.  
22068,0.21245,0.20369,0.19795,0.19956,0.20246,0.12201,0.12281,0.12455,  
0.12193,0.11996,0.099737,0.12234,0.1138,0.12686,0.11914,0.13217,0.1189  
,0.12023,0.12546,0.12229,0.1223,0.12104,0.04945,0.2339,0.21376,0.22135  
,0.25529,0.22101,0.20153,0.19976,0.19135,0.17726,0.22009,0.19966,0.246  
36,0.16922,0.20827,0.20572,0.2205,0.2254,0.23223,0.11832,0.12,0.12188,  
0.125,0.12302,0.10632,0.13977,0.12587,0.12677,0.12234,0.12776,0.12224,  
0.1216,0.12368,0.11444,0.12376,0.11836,0.12134,0.048507,0.2195,0.26056  
,0.20533,0.23331,0.24316,0.20718,0.20272,0.21944,0.20682,0.2203,0.2146  
2,0.20801,0.19774,0.22026,0.22487,0.22313,0.20387,0.20273,0.13405,0.12  
18,0.1211,0.12158,0.12162,0.14445,0.11544,0.12161,0.11875,0.12437,0.12  
211,0.12104,0.11099,0.11714,0.11491,0.12276,0.13366,0.048062,0.049137,  
0.048596,0.21958,0.22025,0.2326,0.21305,0.22823,0.22379,0.21002,0.2073  
6,0.22487,0.18646,0.19222,0.21316,0.19042,0.21813,0.22985,0.10351,0.12  
618,0.12872,0.12311,0.12266,0.12204,0.11595,0.12623,0.11032,0.12987,0.  
12259,0.11277,0.11882,0.11958,0.11639,0.11422,0.12204,0.11916,0.048231  
,0.048927,0.047316,0.051302,0.15552,0.23302,0.1981,0.18659,0.22359,0.2  
1219,0.26209,0.273,0.25704,0.22837,0.19953,0.21411,0.13835,0.11668,0.1  
0663,0.11385,0.13538,0.13465,0.13777,0.11303,0.12716,0.12404,0.13488,0  
.13173,0.12208,0.13572,0.12235,0.12403,0.12587,0.12777,0.10899,0.12367  
,0.047137,0.048463,0.049333,0.049317,0.048637,0.048158,0.2192,0.22073,  
0.26057,0.22585,0.19803,0.21298,0.20333,0.21989,0.11264,0.10496,0.0957  
16,0.12243,0.12182,0.12035,0.12039,0.12636,0.09604,0.12291,0.1305,0.15  
861,0.12074,0.12044,0.14631,0.12594,0.12233,0.098285,0.12217,0.11921,0  
.11887,0.11609,0.12554,0.04897,0.04977,0.046201,0.050454,0.047408,0.04  
8015,0.23859,0.22558,0.24485,0.21617,0.22585,0.048228,0.048363,0.12263  
,0.12157,0.12253,0.12094,0.12194,0.12237,0.12002,0.129,0.11966,0.11422  
,0.11938,0.11741,0.12617,0.12209,0.11548,0.1209,0.1237,0.11777,0.12352  
,0.12695,0.12485,0.048563,0.048587,0.045389,0.048734,0.04689,0.051023,  
0.049735,0.049135,0.047797,0.04595,0.22563,0.20002,0.046925,0.047145,0  
.048551,0.048523,0.13303,0.098877,0.12275,0.12431,0.12472,0.13384,0.12  
252,0.11946,0.12355,0.1167,0.11329,0.13791,0.12844,0.12031,0.12447,0.1  
2151,0.11293,0.13141,0.12907,0.048115,0.050362,0.048369,0.050363,0.048  
935,0.048588,0.048201,0.047877,0.049128,0.046321,0.047562,0.050641,0.0  
48604,0.049468,0.050455,0.046816,0.047221,0.11922,0.12685,0.11167,0.10  
438,0.12222,0.11665,0.12562,0.11166,0.1196,0.12196,0.11932,0.12709,0.1  
1208,0.12155,0.1282,0.1222,0.048847,0.049382,0.048132,0.049051,0.05050  
6,0.049486,0.047102,0.050051,0.04979,0.049624,0.050094,0.04864,0.04923  
2,0.046948,0.051946,0.048155,0.049024,0.047847,0.05115,0.11348,0.11505  
,0.14245,0.12258,0.11262,0.12162,0.12215,0.12748,0.11597,0.12597,0.127  
84,0.12965,0.11067,0.048268,0.049096,0.047265,0.047596,0.049501,0.0483  
21,0.049202,0.049841,0.047673,0.048772,0.048682,0.050973,0.047556,0.04  
841,0.048485,0.048392,0.04997,0.04833,0.047771,0.049369,0.047505,0.116  
69,0.12388,0.13057,0.12352,0.13154,0.10902,0.11505,0.1213,0.12088,0.04  
8426,0.049181,0.047875,0.048863,0.04889,0.048088,0.046947,0.048127,0.0  
4928,0.049777,0.049607,0.047845,0.051342,0.048329,0.046658,0.048228,0.  
050488,0.046016,0.0482,0.048541,0.049642,0.049369,0.049925,0.047904,0.  
050861,0.11483,0.13372,0.12155,0.1065,0.047037,0.048249,0.048016,0.048  
887,0.046448,0.048347,0.048961,0.048265,0.048633,0.050329,0.049457,0.0  
48186,0.049408,0.046838,0.051011,0.04906,0.048927,0.047106,0.046368,0.  
04767,0.049661,0.046501,0.048333,0.047236,0.048873,0.050344,0.052568,0  
.050411,0.046072,0.051364,0.049966,0.046074,0.05136,0.051001,0.049028,

0.047745,0.047134,0.0484,0.048753,0.048502,0.048961,0.048916,0.049561,  
0.049356,0.047709,0.049512,0.051228,0.047488,0.04948,0.049592,0.04645,  
0.049857,0.046065,0.048041,0.049989,0.049739,0.049897,0.048212,0.05084  
7,0.048,0.048251,0.048863,0.049982,0.048836,0.050039,0.048798,0.048604  
,0.049051,0.048793,0.047882,0.050531,0.052657,0.048016,0.050386,0.0452  
71,0.04895,0.050312,0.049669,0.046828,0.049182,0.047421,0.05061,0.0494  
84,0.046918,0.048444,0.047372,0.048623,0.048933,0.049405,0.047939,0.04  
684,0.048095,0.049062,0.047009,0.049828,0.047432,0.049114,0.049866,0.0  
49099,0.050061,0.04976,0.049606,0.049597,0.046349,0.047762,0.049948,0.  
048478,0.049293,0.049905,0.047212,0.048801,0.048618,0.04931,0.05026,0.  
049487,0.047353,0.047412,0.04965,0.048379,0.048922,0.046398,0.047955,0  
.048683,0.049109,0.047802,0.049658,0.048643,0.050113,0.049659,0.047087  
,0.046689,0.049721,0.047412,0.049402,0.049292,0.049127,0.048696,0.0472  
73,0.050245,0.046534,0.047914,0.04697,0.048474,0.046023,0.049323,0.049  
753,0.049866,0.047466,0.049404,0.049705,0.046729,0.048615,0.049685,0.0  
47823,0.051132,0.050843,0.047752,0.05091,0.048937,0.047285,0.048518,0.  
050317,0.050529,0.049263,0.048957,0.049191,0.048406,0.048987,0.050288,  
0.049402,0.048713,0.049003,0.047992,0.048465,0.047303,0.049905,0.04664  
2,0.047948,0.04767,0.049436,0.049469,0.048651,0.049006,0.049361,0.0488  
37,0.050139,0.047326,0.049803,0.046861,0.050327,0.048319,0.048142,0.05  
0171,0.047681,0.052436  
0.19414,0.1964,0.19664,0.19837,0.19747,0.19973,0.19772,0.19656,0.19747  
,0.19878,0.19819,0.19797,0.19622,0.19686,0.19953,0.19672,0.19806,0.202  
13,0.19848,0.19506,0.31465,0.28197,0.3314,0.26381,0.19877,0.19913,0.19  
976,0.19709,0.19391,0.20105,0.197,0.19793,0.19641,0.19559,0.20172,0.19  
663,0.19417,0.19613,0.19873,0.36899,0.27106,0.29473,0.27428,0.29225,0.  
28487,0.28585,0.19669,0.19457,0.19961,0.19945,0.19615,0.19859,0.196,0.  
19825,0.19569,0.19949,0.19801,0.19891,0.19702,0.19965,0.19873,0.40184,  
0.36333,0.26474,0.31463,0.26926,0.29095,0.2973,0.27353,0.27665,0.27927  
,0.19728,0.19873,0.19995,0.19751,0.19709,0.19749,0.19873,0.19688,0.199  
29,0.19822,0.19722,0.19712,0.19661,0.19857,0.19988,0.37684,0.35825,0.3  
8278,0.24703,0.32346,0.297,0.28619,0.29526,0.2925,0.31268,0.29701,0.29  
81,0.20159,0.19894,0.19878,0.19696,0.20018,0.19828,0.19719,0.19632,0.1  
9937,0.20058,0.1986,0.19988,0.20017,0.2006,0.19497,0.20035,0.35405,0.3  
9145,0.39882,0.39521,0.29585,0.3043,0.2627,0.29902,0.27864,0.27831,0.2  
8482,0.29378,0.3017,0.30114,0.19936,0.19908,0.19877,0.19855,0.19591,0.  
19661,0.19761,0.19603,0.19976,0.19917,0.19797,0.19854,0.19709,0.20061,  
0.19502,0.19506,0.33968,0.37426,0.40031,0.37561,0.36978,0.374,0.28636,  
0.27875,0.273,0.29464,0.28025,0.30398,0.26859,0.28643,0.27759,0.29246,  
0.19753,0.19751,0.19762,0.19574,0.19797,0.19906,0.19611,0.19945,0.1973  
,0.19918,0.19985,0.20078,0.20027,0.19674,0.19934,0.19915,0.19903,0.393  
91,0.39651,0.36638,0.39991,0.36438,0.41374,0.29568,0.26861,0.30025,0.3  
1278,0.30354,0.30384,0.28185,0.28381,0.28969,0.27213,0.29431,0.19795,0  
.19852,0.19547,0.19549,0.19748,0.19635,0.19336,0.19852,0.19589,0.19984  
,0.19847,0.19403,0.19797,0.12666,0.108,0.12656,0.1989,0.35717,0.38973,  
0.365,0.40021,0.3876,0.38348,0.36631,0.29116,0.27344,0.31143,0.28617,0  
.31829,0.27695,0.28421,0.29346,0.27996,0.28437,0.27844,0.19425,0.19861  
,0.20015,0.19912,0.19622,0.19763,0.19862,0.19506,0.19613,0.19874,0.198  
5,0.10129,0.122,0.12175,0.12179,0.12125,0.12647,0.19858,0.36278,0.3906  
1,0.39884,0.37936,0.37973,0.36747,0.38609,0.28777,0.29726,0.27288,0.30  
273,0.28834,0.29087,0.29251,0.28971,0.29959,0.28102,0.26029,0.19566,0.  
20127,0.19803,0.19737,0.19473,0.20011,0.19913,0.19909,0.20034,0.12089,



0.12344,0.13481,0.12103,0.12155,0.12068,0.12192,0.12882,0.12079,0.1970  
5,0.38026,0.3824,0.40021,0.4057,0.36949,0.37905,0.38603,0.28213,0.2781  
3,0.29339,0.30226,0.29547,0.29221,0.29723,0.2751,0.2857,0.28414,0.2955  
2,0.26404,0.19624,0.19781,0.19914,0.19927,0.19752,0.19987,0.11283,0.12  
214,0.12582,0.12273,0.13849,0.12346,0.115,0.12263,0.12362,0.13878,0.12  
336,0.12356,0.38428,0.39467,0.37574,0.41342,0.37274,0.38849,0.37992,0.  
28122,0.27888,0.28938,0.30045,0.29989,0.30579,0.30072,0.29479,0.3047,0.  
.29416,0.30017,0.28052,0.19954,0.1974,0.20004,0.11754,0.1402,0.11059,0.  
.11106,0.12616,0.11953,0.12283,0.12221,0.12591,0.12327,0.1226,0.13203,  
0.12596,0.14661,0.12334,0.36982,0.35091,0.39833,0.3459,0.37378,0.38706  
,0.4324,0.37531,0.38299,0.28543,0.294,0.27792,0.2931,0.26965,0.28049,0.  
.29005,0.29391,0.288,0.29421,0.30027,0.12165,0.12263,0.12031,0.11997,0.  
.12264,0.12163,0.11734,0.12364,0.12842,0.11982,0.10786,0.12123,0.12177  
,0.12116,0.12203,0.10448,0.11615,0.1279,0.37795,0.39517,0.43461,0.3928  
3,0.36042,0.37631,0.39982,0.34993,0.37187,0.31313,0.27043,0.22652,0.19  
7,0.21223,0.21291,0.20527,0.21332,0.22646,0.19648,0.2123,0.12418,0.135  
65,0.1136,0.10767,0.12089,0.13925,0.12497,0.12008,0.12877,0.10328,0.11  
947,0.12321,0.11964,0.12135,0.12659,0.11867,0.12132,0.11835,0.36319,0.  
37318,0.39087,0.41139,0.39767,0.37041,0.39195,0.36118,0.36702,0.19709,  
0.21891,0.20535,0.22692,0.1999,0.23537,0.19399,0.23156,0.22662,0.21403  
,0.1912,0.12107,0.1239,0.13436,0.12216,0.1192,0.14133,0.14164,0.12103,  
0.13593,0.12467,0.12081,0.1271,0.13427,0.1136,0.11201,0.12221,0.11353,  
0.12214,0.3881,0.39365,0.37523,0.37901,0.38976,0.39503,0.38231,0.20455  
,0.21348,0.26499,0.19762,0.2059,0.21396,0.20974,0.19839,0.20041,0.2084  
2,0.21386,0.21316,0.21015,0.12112,0.12187,0.13111,0.1145,0.12242,0.120  
36,0.12347,0.14088,0.12268,0.12214,0.11335,0.12501,0.11858,0.12143,0.1  
1406,0.11475,0.11759,0.13497,0.3712,0.38587,0.37593,0.41363,0.38477,0.  
36902,0.217,0.23277,0.23472,0.18976,0.21053,0.21491,0.19666,0.20722,0.  
20603,0.23088,0.21535,0.21519,0.20852,0.23717,0.12044,0.12329,0.11984,  
0.12065,0.11338,0.12118,0.11671,0.11838,0.12696,0.1264,0.1417,0.12202,  
0.12185,0.11505,0.13481,0.12806,0.11048,0.12207,0.35265,0.38949,0.3914  
5,0.37369,0.38534,0.23968,0.21701,0.20636,0.22293,0.20279,0.16978,0.20  
209,0.22007,0.21209,0.2103,0.20935,0.21601,0.20389,0.21381,0.21008,0.1  
3686,0.10911,0.13667,0.11827,0.10532,0.12167,0.11727,0.13688,0.11095,0.  
.12133,0.11448,0.12217,0.12122,0.11963,0.12529,0.13276,0.113,0.1228,0.  
40479,0.36187,0.37899,0.21305,0.22366,0.21063,0.23186,0.20463,0.22962,  
0.18602,0.23139,0.22754,0.20831,0.19829,0.22951,0.19785,0.21397,0.2166  
,0.18711,0.18957,0.11748,0.12175,0.11067,0.12196,0.11342,0.12848,0.131  
11,0.12226,0.12114,0.10914,0.12169,0.12241,0.12483,0.13547,0.11287,0.1  
227,0.1216,0.12082,0.37378,0.22675,0.2206,0.21008,0.18521,0.22838,0.20  
339,0.20727,0.18413,0.21,0.2098,0.2138,0.20951,0.20468,0.23395,0.20098  
,0.21463,0.21365,0.21065,0.12195,0.12184,0.12223,0.12083,0.11874,0.113  
96,0.11749,0.12258,0.12674,0.12554,0.12066,0.12073,0.11843,0.12955,0.1  
4611,0.12083,0.1068,0.044622,0.21242,0.21681,0.20978,0.20485,0.20901,0.  
.18128,0.20953,0.24841,0.20485,0.27303,0.23811,0.17452,0.18112,0.21618  
,0.21265,0.20237,0.19779,0.19473,0.19789,0.12138,0.12231,0.12392,0.121  
67,0.11875,0.098058,0.12259,0.11318,0.12599,0.11892,0.13187,0.1185,0.1  
2013,0.12515,0.12159,0.12077,0.12084,0.046801,0.23317,0.20506,0.21548,  
0.24484,0.21291,0.18975,0.19247,0.18344,0.17158,0.2133,0.19784,0.2381,  
0.1672,0.2029,0.20356,0.21771,0.22267,0.23154,0.11835,0.12046,0.12202,  
0.12479,0.12259,0.10594,0.1402,0.12511,0.12661,0.12174,0.12794,0.12165  
,0.12087,0.12358,0.11327,0.12367,0.11753,0.12004,0.045923,0.21356,0.25

608,0.20651,0.22557,0.23343,0.20718,0.19258,0.21297,0.19929,0.21404,0.20863,0.20225,0.19473,0.21742,0.21559,0.21416,0.20139,0.20002,0.13414,0.12107,0.12024,0.12098,0.12118,0.14471,0.11501,0.12079,0.11812,0.12361,0.12196,0.12036,0.11049,0.11665,0.11405,0.12209,0.13392,0.045053,0.046027,0.047027,0.21263,0.21946,0.22512,0.20843,0.2248,0.20855,0.20456,0.20067,0.22116,0.18303,0.18896,0.21195,0.18816,0.21368,0.22637,0.10271,0.12527,0.12871,0.1224,0.12224,0.12113,0.11584,0.12619,0.10941,0.12869,0.12191,0.11225,0.11932,0.11898,0.11499,0.11429,0.12141,0.1197,0.044931,0.046214,0.045153,0.048149,0.15083,0.22477,0.19382,0.18162,0.22119,0.20392,0.25312,0.26571,0.24143,0.22107,0.20007,0.2084,0.13787,0.1162,0.10556,0.11397,0.13546,0.1347,0.13888,0.11222,0.12668,0.12344,0.13463,0.13227,0.12149,0.13558,0.12216,0.12334,0.12564,0.12779,0.10799,0.12318,0.043605,0.045932,0.047004,0.046898,0.045435,0.045886,0.21973,0.21104,0.25907,0.22486,0.19302,0.20238,0.202,0.21419,0.11208,0.10367,0.094296,0.12221,0.12147,0.11902,0.1193,0.12684,0.094818,0.12257,0.13038,0.15813,0.12018,0.11955,0.14609,0.1254,0.12137,0.096264,0.12253,0.11828,0.11839,0.11509,0.12499,0.04627,0.046843,0.043988,0.047689,0.044542,0.046128,0.23581,0.21836,0.23868,0.20998,0.22386,0.04563,0.045293,0.12229,0.12093,0.12226,0.12113,0.12135,0.12169,0.11925,0.12886,0.11875,0.11396,0.11896,0.11656,0.12603,0.12162,0.11519,0.12054,0.12348,0.11712,0.12361,0.12626,0.12463,0.045347,0.04549,0.042779,0.046631,0.044647,0.047603,0.047557,0.045723,0.044912,0.044121,0.21509,0.18462,0.044107,0.045352,0.045623,0.0461,0.13266,0.097614,0.1215,0.12365,0.12401,0.13433,0.12277,0.1189,0.12301,0.11516,0.11216,0.13788,0.12781,0.11988,0.124,0.12099,0.11258,0.13115,0.12782,0.045753,0.046593,0.045623,0.047577,0.045983,0.045788,0.046706,0.045617,0.045417,0.045073,0.045607,0.048013,0.045364,0.046532,0.047586,0.043677,0.044162,0.11846,0.12785,0.11047,0.1035,0.12154,0.11674,0.12494,0.11049,0.11815,0.12176,0.11863,0.12679,0.11231,0.12134,0.12858,0.12134,0.045528,0.046985,0.046091,0.046379,0.04664,0.047057,0.044296,0.048193,0.047034,0.046727,0.04779,0.044981,0.044996,0.044696,0.049226,0.045347,0.046219,0.045523,0.047535,0.11305,0.1145,0.14156,0.12147,0.11193,0.12178,0.1222,0.12714,0.11577,0.12551,0.12723,0.1301,0.10975,0.045776,0.046443,0.045201,0.045456,0.046597,0.046526,0.045503,0.047245,0.044596,0.044987,0.045488,0.048518,0.044797,0.045718,0.045236,0.044839,0.04724,0.045902,0.045017,0.047054,0.043974,0.11584,0.12314,0.1312,0.1222,0.13131,0.1086,0.11438,0.12122,0.12031,0.046235,0.04593,0.045123,0.045603,0.045136,0.045504,0.045078,0.045736,0.046573,0.046781,0.046485,0.044818,0.049242,0.0455,0.044426,0.044981,0.047104,0.043889,0.044658,0.046012,0.046139,0.046059,0.047412,0.044987,0.047616,0.11407,0.13293,0.12113,0.10553,0.044256,0.045679,0.045119,0.046202,0.043728,0.045469,0.045037,0.045979,0.046171,0.04734,0.046741,0.04512,0.046401,0.043991,0.048458,0.045101,0.046216,0.044827,0.04479,0.044907,0.046996,0.043917,0.04467,0.04438,0.046227,0.046659,0.048613,0.047208,0.043705,0.048988,0.047168,0.043646,0.048209,0.04714,0.045403,0.04509,0.044981,0.045452,0.04511,0.046522,0.047102,0.04704,0.047057,0.045808,0.044627,0.046662,0.047108,0.04403,0.046604,0.046505,0.042584,0.046658,0.04368,0.04578,0.047571,0.046924,0.0463,0.046411,0.046574,0.045038,0.04577,0.046442,0.046402,0.045856,0.046212,0.046252,0.046052,0.045659,0.046168,0.045817,0.046756,0.050118,0.045727,0.047109,0.04386,0.046816,0.047759,0.04681,0.044449,0.046161,0.044543,0.047547,0.04618,0.044744,0.045997,0.044993,0.046638,0.04614,0.04539,0.045304,0.044737,0.045492,0.045833,0.044941,0.047413,0.044707,0.046732,0.047303,0.046

475,0.048222,0.046716,0.047181,0.047104,0.043111,0.044961,0.048011,0.045495,0.045699,0.047657,0.044803,0.045121,0.04586,0.045709,0.047997,0.046813,0.0448,0.043908,0.046989,0.046042,0.046842,0.04407,0.045281,0.045523,0.04698,0.044968,0.047961,0.046438,0.046594,0.046211,0.044282,0.042816,0.047623,0.044917,0.046626,0.046204,0.046323,0.046209,0.044416,0.047546,0.044129,0.045743,0.044283,0.045632,0.043865,0.046692,0.046492,0.04597,0.045201,0.047571,0.046527,0.04445,0.046062,0.045896,0.044823,0.047472,0.048204,0.044947,0.04744,0.045516,0.044297,0.046048,0.046703,0.048248,0.045993,0.045682,0.046488,0.044733,0.046101,0.047619,0.047044,0.045378,0.046718,0.046252,0.04571,0.044378,0.047062,0.043706,0.044602,0.044484,0.046257,0.046405,0.046612,0.04716,0.046039,0.046534,0.046689,0.044312,0.046843,0.043349,0.047741,0.045696,0.045778,0.048301,0.044067,0.049056

0.19698,0.19841,0.1976,0.19972,0.19987,0.20204,0.19887,0.19734,0.20082,0.20013,0.19851,0.19933,0.19893,0.19839,0.20182,0.19922,0.19966,0.20344,0.20088,0.1957,0.31124,0.2801,0.33199,0.26573,0.19972,0.19997,0.20272,0.19835,0.19612,0.20188,0.19886,0.19914,0.19808,0.19764,0.20415,0.19916,0.1963,0.1975,0.199,0.35796,0.26729,0.29963,0.27306,0.28918,0.27841,0.28245,0.1976,0.1962,0.20123,0.20069,0.19667,0.20034,0.19789,0.19939,0.19688,0.20057,0.20074,0.20014,0.19683,0.2013,0.1992,0.38811,0.35861,0.27118,0.30764,0.27033,0.29129,0.29282,0.27792,0.27834,0.27599,0.19784,0.19966,0.20244,0.19904,0.19701,0.19904,0.20058,0.19947,0.20117,0.19926,0.19886,0.19837,0.19948,0.2,0.20304,0.35215,0.35002,0.38039,0.24501,0.3267,0.28964,0.28744,0.29094,0.28991,0.30249,0.29133,0.29283,0.20312,0.2019,0.19868,0.19899,0.2016,0.19972,0.19861,0.19752,0.20049,0.20163,0.20043,0.2007,0.20109,0.20174,0.19704,0.20146,0.3556,0.37724,0.38605,0.38271,0.29287,0.29532,0.25933,0.29177,0.27831,0.27968,0.27735,0.29152,0.29577,0.30127,0.20034,0.20044,0.20212,0.20131,0.19798,0.19809,0.19974,0.19871,0.20132,0.2004,0.19915,0.20069,0.19874,0.20179,0.19728,0.19804,0.33253,0.36596,0.39458,0.3715,0.36604,0.38562,0.28111,0.27519,0.27089,0.29226,0.28023,0.30344,0.26592,0.28336,0.27428,0.28626,0.19751,0.19942,0.2012,0.19758,0.19889,0.20049,0.1982,0.20135,0.19882,0.19929,0.20069,0.2032,0.20097,0.19803,0.20064,0.19937,0.2012,0.38054,0.39045,0.36695,0.39014,0.36443,0.40645,0.29073,0.26208,0.28963,0.31011,0.29699,0.30078,0.29285,0.28663,0.28907,0.27334,0.29112,0.19858,0.20074,0.19804,0.19616,0.19892,0.198,0.19576,0.19965,0.19716,0.20213,0.20007,0.1956,0.20074,0.12748,0.10738,0.12721,0.19969,0.34669,0.38112,0.35244,0.39207,0.38219,0.3762,0.3592,0.29227,0.27218,0.30236,0.27612,0.31153,0.27413,0.28556,0.29065,0.28403,0.27994,0.27657,0.19766,0.2005,0.20129,0.20129,0.19877,0.19914,0.20056,0.19553,0.19771,0.2018,0.2001,0.10088,0.12129,0.12192,0.12205,0.12135,0.12602,0.20068,0.34469,0.38144,0.381,0.36627,0.36849,0.3592,0.36577,0.28585,0.29557,0.27453,0.30399,0.28008,0.29458,0.29245,0.29546,0.29709,0.27956,0.25792,0.19727,0.20344,0.20044,0.19895,0.19611,0.20061,0.20134,0.19937,0.20261,0.12033,0.12419,0.13398,0.12135,0.12092,0.12061,0.12167,0.1289,0.12055,0.19809,0.3725,0.36523,0.40431,0.38763,0.36619,0.37028,0.37509,0.27969,0.28231,0.29222,0.29717,0.29293,0.28017,0.2977,0.26818,0.28523,0.27855,0.28585,0.2634,0.19727,0.19793,0.20088,0.20091,0.19979,0.2025,0.11313,0.123,0.12587,0.12242,0.13878,0.12329,0.11557,0.12228,0.1233,0.14002,0.12337,0.12242,0.38324,0.39064,0.36651,0.40225,0.37185,0.37789,0.37188,0.28077,0.27116,0.28467,0.29694,0.2937,0.3078,0.28864,0.29284,0.29195,0.29461,0.29256,0.27328,0.20103,0.19772,0.20154,0.11736,0.14046,0.11035,0.10986,0

.12575,0.11867,0.12301,0.12211,0.12559,0.12413,0.12192,0.13179,0.12704  
,0.14688,0.1236,0.36076,0.35376,0.37412,0.35211,0.36567,0.37588,0.4220  
5,0.35715,0.37323,0.28163,0.29037,0.2778,0.28883,0.27132,0.27417,0.287  
96,0.28729,0.28612,0.29109,0.30375,0.12093,0.12327,0.12045,0.1201,0.12  
331,0.12203,0.11732,0.12355,0.12739,0.11972,0.10759,0.12088,0.12169,0.  
12125,0.12183,0.10386,0.11616,0.12727,0.36244,0.37992,0.42104,0.38403,  
0.36767,0.37177,0.40096,0.35518,0.36199,0.30559,0.27292,0.22553,0.1943  
4,0.21008,0.20932,0.20608,0.21456,0.22627,0.18943,0.20691,0.12493,0.13  
577,0.11295,0.1079,0.12045,0.13893,0.12535,0.12019,0.12791,0.10222,0.1  
1946,0.12296,0.11947,0.12085,0.12683,0.11736,0.12149,0.11825,0.3605,0.  
36732,0.38175,0.40963,0.38568,0.3561,0.3878,0.35379,0.36831,0.1976,0.2  
125,0.2012,0.22139,0.19829,0.23573,0.19299,0.23494,0.21301,0.2093,0.18  
938,0.12159,0.12423,0.13427,0.12179,0.11825,0.14198,0.14228,0.12096,0.  
1357,0.1249,0.12078,0.12684,0.13531,0.11314,0.11129,0.12192,0.11316,0.  
12238,0.38677,0.38417,0.36746,0.37834,0.37751,0.38737,0.37926,0.2057,0.  
.20768,0.25824,0.1954,0.20151,0.20999,0.20726,0.19562,0.19715,0.20573,  
0.21101,0.21327,0.20419,0.12122,0.1222,0.13119,0.11386,0.12247,0.12002  
,0.1228,0.14032,0.12225,0.12222,0.11302,0.12425,0.11755,0.12177,0.1144  
4,0.1146,0.11727,0.13474,0.37178,0.37724,0.35708,0.40487,0.37527,0.365  
78,0.21083,0.23265,0.22954,0.1849,0.20405,0.21436,0.19682,0.20567,0.20  
292,0.22404,0.20894,0.21485,0.2083,0.23718,0.11957,0.12263,0.11962,0.1  
2001,0.11308,0.12113,0.11657,0.11862,0.12657,0.1263,0.14194,0.1223,0.1  
209,0.11528,0.1346,0.12853,0.10988,0.12203,0.36941,0.37925,0.38324,0.3  
7027,0.37883,0.24286,0.21891,0.20565,0.22015,0.19538,0.16315,0.2014,0.  
22204,0.21464,0.20648,0.19713,0.2131,0.20266,0.20843,0.21138,0.1367,0.  
1091,0.13753,0.11775,0.10431,0.12087,0.11698,0.13681,0.1104,0.12155,0.  
11381,0.12166,0.12207,0.1195,0.12471,0.13258,0.11233,0.12194,0.38825,0  
.36412,0.37262,0.20428,0.21905,0.20555,0.22801,0.19755,0.22771,0.18278  
,0.22452,0.22832,0.20557,0.19757,0.23399,0.19301,0.20995,0.21801,0.186  
11,0.18587,0.11741,0.12147,0.11028,0.12245,0.11316,0.12971,0.13092,0.1  
2274,0.12063,0.10806,0.12166,0.12254,0.12479,0.1366,0.1128,0.12264,0.1  
2082,0.1208,0.36125,0.21911,0.22772,0.20702,0.18234,0.21762,0.20107,0.  
20783,0.1924,0.20287,0.21189,0.21082,0.20831,0.20135,0.23267,0.20081,0  
.21315,0.20942,0.20684,0.12127,0.12202,0.12223,0.12054,0.11847,0.11415  
,0.11731,0.12251,0.12644,0.12474,0.12098,0.1208,0.11878,0.12981,0.1461  
2,0.11984,0.10685,0.042734,0.20269,0.20942,0.20517,0.20277,0.20219,0.1  
799,0.2037,0.24555,0.19857,0.26821,0.23574,0.17542,0.18078,0.21034,0.2  
0961,0.20311,0.19538,0.19113,0.20134,0.1206,0.12218,0.12398,0.12178,0.  
11944,0.0974,0.12206,0.11282,0.12638,0.11795,0.13208,0.11846,0.11965,0  
.12459,0.12145,0.12093,0.12063,0.044499,0.22783,0.2045,0.20998,0.24329  
,0.20809,0.18843,0.18707,0.17989,0.16719,0.21255,0.1988,0.23749,0.1677  
,0.20374,0.20191,0.21432,0.22103,0.23064,0.1185,0.12093,0.12141,0.1246  
8,0.12285,0.10582,0.1408,0.12564,0.12651,0.12209,0.12797,0.12162,0.120  
79,0.12373,0.11287,0.12314,0.11734,0.11992,0.044002,0.21755,0.24889,0.  
20038,0.21963,0.23027,0.20586,0.1955,0.20967,0.19896,0.21147,0.20044,0  
.1978,0.19243,0.211,0.21107,0.20702,0.19191,0.19778,0.13455,0.12241,0.  
12047,0.12132,0.12046,0.14583,0.11487,0.11995,0.11805,0.12302,0.1219,0  
.12033,0.10953,0.11627,0.1143,0.12218,0.13376,0.042793,0.04286,0.04528  
2,0.20794,0.2152,0.22258,0.20383,0.22512,0.1992,0.19774,0.20011,0.2182  
5,0.18378,0.18793,0.20775,0.18704,0.21093,0.22497,0.10301,0.12513,0.12  
908,0.1223,0.12179,0.12164,0.11473,0.12645,0.10882,0.12795,0.12221,0.1  
1252,0.11866,0.11881,0.11416,0.11398,0.12133,0.11957,0.04286,0.044579,

0.043388,0.046234,0.1481,0.21871,0.19538,0.17864,0.21851,0.20439,0.244  
51,0.25907,0.23366,0.21253,0.19584,0.20445,0.13843,0.11605,0.1048,0.11  
375,0.13585,0.13479,0.1393,0.1125,0.12588,0.12328,0.13525,0.13227,0.12  
148,0.13634,0.1212,0.12361,0.1257,0.12806,0.10771,0.12241,0.041077,0.0  
43996,0.04474,0.044666,0.043713,0.043589,0.21773,0.21347,0.26306,0.211  
84,0.18898,0.19971,0.19804,0.21274,0.11099,0.10328,0.093679,0.12231,0.  
12124,0.11934,0.11882,0.12563,0.09451,0.12183,0.131,0.15905,0.12005,0.  
11903,0.14662,0.12539,0.1218,0.09589,0.12245,0.11825,0.11805,0.11455,0.  
.12582,0.044468,0.045379,0.041502,0.046308,0.042734,0.044783,0.2321,0.  
2128,0.23176,0.20999,0.21749,0.044571,0.043,0.12196,0.1204,0.12163,0.1  
2133,0.12137,0.12139,0.11925,0.1302,0.11835,0.11375,0.11863,0.11694,0.  
1267,0.12144,0.11466,0.12118,0.12384,0.11725,0.12383,0.12628,0.12494,0.  
.044262,0.043034,0.04126,0.043932,0.043436,0.045273,0.044966,0.043948,  
0.04271,0.042104,0.2095,0.18312,0.041973,0.042758,0.043256,0.044144,0.  
13244,0.097638,0.12113,0.12311,0.12399,0.1339,0.12349,0.11846,0.12323,  
0.11509,0.1123,0.13674,0.12773,0.11922,0.12434,0.12187,0.1122,0.13155,  
0.1282,0.043445,0.043691,0.044451,0.045458,0.043521,0.043391,0.044905,  
0.044023,0.044093,0.043306,0.043582,0.04686,0.042944,0.044399,0.045204  
,0.041287,0.042232,0.1185,0.12846,0.1107,0.10218,0.1206,0.11609,0.1242  
,0.1103,0.11768,0.1219,0.11873,0.12654,0.11258,0.1214,0.12857,0.12149,  
0.043095,0.044587,0.044226,0.044569,0.045266,0.045003,0.04296,0.04634,  
0.04482,0.044102,0.046677,0.043416,0.04317,0.043277,0.04741,0.043367,0  
.043984,0.042059,0.046368,0.1128,0.1145,0.1422,0.12194,0.11112,0.12123  
,0.12156,0.1272,0.11603,0.12567,0.1273,0.12974,0.10942,0.044126,0.0448  
45,0.044272,0.044316,0.044873,0.043956,0.042994,0.045466,0.042424,0.04  
3323,0.042804,0.047091,0.043491,0.042842,0.043114,0.042944,0.044953,0.  
044653,0.042905,0.044615,0.042573,0.11542,0.12272,0.13057,0.1226,0.131  
17,0.10858,0.11522,0.12109,0.1203,0.044224,0.042943,0.043653,0.043959,  
0.042664,0.043561,0.042835,0.043836,0.045236,0.04415,0.044502,0.043089  
,0.046923,0.043261,0.043115,0.043114,0.044265,0.041513,0.042491,0.0437  
96,0.043839,0.044762,0.044968,0.042809,0.04494,0.11405,0.13237,0.12133  
,0.10517,0.042964,0.043819,0.043271,0.044275,0.041647,0.043052,0.04389  
8,0.044141,0.044476,0.045765,0.045119,0.043786,0.044142,0.042779,0.046  
077,0.043262,0.04371,0.042936,0.042798,0.042638,0.045249,0.042679,0.04  
2623,0.043224,0.045636,0.043653,0.04668,0.045618,0.042034,0.047219,0.0  
45451,0.04163,0.046697,0.044756,0.043301,0.04309,0.043256,0.042755,0.0  
42798,0.044319,0.045029,0.04574,0.04589,0.043821,0.043068,0.043955,0.0  
45531,0.042456,0.04515,0.044841,0.040206,0.043891,0.04212,0.044487,0.0  
44754,0.04537,0.04402,0.043769,0.044149,0.042989,0.04432,0.044266,0.04  
4347,0.044225,0.044692,0.043744,0.044065,0.043398,0.044539,0.044521,0.  
044867,0.047449,0.043507,0.045126,0.041295,0.044253,0.046532,0.045066,  
0.042499,0.044357,0.042786,0.045829,0.044915,0.042905,0.044457,0.04239  
8,0.042856,0.043997,0.042916,0.042735,0.043304,0.043612,0.043748,0.042  
635,0.046315,0.04342,0.04387,0.044926,0.044638,0.04565,0.044575,0.0457  
69,0.044044,0.041066,0.043586,0.046106,0.043425,0.042747,0.045868,0.04  
3445,0.042386,0.043687,0.042753,0.046129,0.04528,0.042413,0.043193,0.0  
4395,0.0439,0.045276,0.042737,0.043829,0.044148,0.045427,0.043148,0.04  
471,0.044902,0.044043,0.044821,0.042828,0.040778,0.044746,0.043148,0.0  
44862,0.044356,0.044082,0.045279,0.042038,0.045832,0.04296,0.043432,0.  
042785,0.044739,0.041768,0.046065,0.044642,0.044515,0.043437,0.045628,  
0.044131,0.042666,0.044037,0.043658,0.042528,0.044822,0.04537,0.043263  
,0.044604,0.042925,0.042081,0.044696,0.043708,0.045779,0.043286,0.0435

42,0.044389,0.043781,0.045268,0.044698,0.045817,0.04388,0.043934,0.044  
933,0.043744,0.042922,0.045067,0.04258,0.041823,0.042776,0.0443,0.0449  
65,0.04382,0.045533,0.044033,0.043474,0.043992,0.04219,0.044915,0.0422  
4,0.045593,0.04322,0.043271,0.045443,0.043038,0.045657  
0.198,0.19836,0.19858,0.20222,0.20114,0.20396,0.20064,0.19887,0.20298,  
0.20049,0.20077,0.19985,0.20031,0.20006,0.20456,0.19941,0.20137,0.2045  
7,0.20301,0.19781,0.3043,0.27653,0.32678,0.26858,0.20147,0.20139,0.204  
2,0.19948,0.19845,0.20231,0.20022,0.2009,0.1996,0.19846,0.20492,0.2005  
9,0.1975,0.1983,0.20185,0.34319,0.27595,0.29719,0.27495,0.29221,0.2723  
4,0.27785,0.2003,0.19939,0.20217,0.20076,0.19826,0.20393,0.19952,0.200  
72,0.19819,0.20213,0.20181,0.20032,0.19785,0.20237,0.20096,0.38558,0.3  
5173,0.27363,0.30985,0.26728,0.29273,0.29042,0.27407,0.27898,0.27162,0  
.19945,0.20059,0.20406,0.20016,0.19976,0.20058,0.20198,0.20118,0.20176  
,0.20103,0.20035,0.19962,0.20034,0.2001,0.20366,0.34934,0.34168,0.3915  
,0.24467,0.32159,0.28583,0.28935,0.28881,0.28763,0.29764,0.29099,0.287  
94,0.20264,0.20301,0.20022,0.20114,0.20361,0.20161,0.20049,0.19793,0.2  
0217,0.20313,0.2014,0.2014,0.20232,0.20168,0.20024,0.20209,0.35887,0.3  
6404,0.38798,0.3822,0.29503,0.28916,0.26046,0.28821,0.27856,0.28317,0.  
27536,0.2858,0.29248,0.29444,0.20272,0.2027,0.20275,0.2023,0.19889,0.2  
012,0.20018,0.2,0.20064,0.20142,0.2001,0.20073,0.19807,0.20259,0.19969  
,0.20015,0.32214,0.3702,0.38866,0.36026,0.35039,0.37627,0.28064,0.2709  
7,0.27222,0.29432,0.27629,0.30533,0.26695,0.27526,0.27217,0.28392,0.19  
929,0.2011,0.20196,0.19896,0.2001,0.20263,0.20013,0.20284,0.20003,0.20  
13,0.20273,0.20501,0.2019,0.19958,0.20161,0.19992,0.20301,0.37301,0.37  
5,0.36133,0.37441,0.36802,0.39972,0.28282,0.25835,0.28894,0.30535,0.29  
445,0.29573,0.29181,0.28525,0.29335,0.27256,0.28963,0.1997,0.20195,0.1  
9959,0.19729,0.19944,0.19955,0.19751,0.20114,0.19735,0.20427,0.20092,0  
.1967,0.20229,0.12698,0.10686,0.12764,0.20224,0.34191,0.38533,0.34732,  
0.38662,0.37129,0.37411,0.35256,0.29409,0.27626,0.30056,0.27952,0.3084  
9,0.26906,0.28194,0.28562,0.2813,0.2768,0.2784,0.19807,0.20048,0.20264  
,0.20144,0.20016,0.20087,0.20224,0.19755,0.19901,0.20273,0.20001,0.099  
865,0.12061,0.12177,0.12247,0.12131,0.12693,0.20202,0.33723,0.37304,0.  
36085,0.36794,0.36086,0.35991,0.35333,0.28692,0.29417,0.27191,0.30552,  
0.27322,0.29878,0.29121,0.29335,0.29937,0.27594,0.25837,0.19946,0.2037  
3,0.20066,0.20067,0.19763,0.20096,0.20246,0.20079,0.20273,0.12168,0.12  
387,0.13469,0.12121,0.12131,0.12159,0.12174,0.12911,0.12033,0.1998,0.3  
628,0.35286,0.38632,0.37506,0.37339,0.37448,0.38283,0.2803,0.27996,0.2  
8968,0.29537,0.29104,0.27431,0.29372,0.26711,0.28812,0.27621,0.28468,0  
.26038,0.19869,0.19851,0.20161,0.20258,0.20146,0.20276,0.1134,0.12252,  
0.12646,0.12207,0.13926,0.12404,0.1152,0.12252,0.12291,0.13989,0.12343  
,0.12249,0.36742,0.3894,0.35694,0.38957,0.3696,0.36438,0.37056,0.27988  
,0.27731,0.28823,0.2869,0.2879,0.30281,0.29202,0.28705,0.29058,0.29292  
,0.29259,0.27199,0.20219,0.19932,0.20287,0.11655,0.14084,0.1102,0.1098  
9,0.12602,0.11847,0.12268,0.12259,0.12498,0.12453,0.12137,0.13255,0.12  
73,0.14736,0.12313,0.36293,0.35785,0.37704,0.35472,0.37002,0.37171,0.4  
1268,0.3539,0.36448,0.28038,0.28103,0.28096,0.28339,0.26472,0.27378,0.  
28165,0.29009,0.28211,0.28992,0.2982,0.12086,0.12349,0.12013,0.12065,0  
.12394,0.12158,0.11685,0.12368,0.12652,0.1196,0.1077,0.12072,0.12143,0  
.12177,0.12179,0.10395,0.11637,0.12653,0.35172,0.37366,0.42027,0.37204  
,0.34984,0.36603,0.38864,0.34921,0.36687,0.30868,0.27698,0.22268,0.191  
02,0.21303,0.20128,0.20462,0.21314,0.21959,0.18505,0.2055,0.12559,0.13  
657,0.11325,0.10759,0.12069,0.13981,0.12517,0.12019,0.12824,0.10167,0.

11941,0.12234,0.11988,0.12119,0.12674,0.11681,0.12138,0.11849,0.35848,  
0.36253,0.3719,0.40291,0.3763,0.35052,0.39526,0.34313,0.36106,0.18823,  
0.20687,0.19991,0.22149,0.19917,0.23865,0.19048,0.23119,0.21091,0.2070  
9,0.18832,0.12129,0.12526,0.13476,0.12268,0.1181,0.14175,0.14278,0.121  
78,0.13632,0.125,0.12158,0.12642,0.13681,0.11275,0.11141,0.12214,0.112  
93,0.12218,0.37296,0.38708,0.36271,0.37228,0.38313,0.37987,0.39009,0.1  
957,0.21304,0.24813,0.18934,0.20046,0.20929,0.20509,0.19742,0.19879,0.  
20727,0.20735,0.20965,0.2028,0.12097,0.12162,0.13113,0.11404,0.12263,0  
.12013,0.12232,0.14111,0.12245,0.12272,0.1135,0.12504,0.11801,0.12147,  
0.11486,0.11418,0.11775,0.13489,0.37258,0.37711,0.35445,0.40346,0.3868  
7,0.3661,0.21752,0.23063,0.21947,0.18567,0.19902,0.21622,0.19261,0.207  
17,0.20253,0.2196,0.20312,0.20958,0.20694,0.23674,0.11963,0.12274,0.12  
018,0.12083,0.11289,0.12103,0.11751,0.11859,0.12618,0.12663,0.14296,0.  
12248,0.12112,0.1152,0.13498,0.12881,0.10913,0.12249,0.36226,0.37693,0  
.39441,0.34622,0.36233,0.23802,0.21563,0.20798,0.21061,0.1831,0.16635,  
0.19579,0.21657,0.21639,0.20106,0.19653,0.21285,0.19863,0.20584,0.2100  
6,0.13706,0.10887,0.13762,0.11731,0.10344,0.12103,0.11672,0.13675,0.11  
027,0.12152,0.11366,0.12197,0.12198,0.11905,0.12497,0.13288,0.11305,0.  
12171,0.37255,0.35964,0.36265,0.20412,0.22195,0.19594,0.21783,0.19349,  
0.22066,0.18215,0.21093,0.22487,0.19743,0.19521,0.2313,0.19685,0.20793  
,0.20819,0.18544,0.1844,0.11768,0.12174,0.10957,0.12175,0.11337,0.1299  
,0.13137,0.12344,0.12072,0.10849,0.12183,0.12316,0.12438,0.13684,0.113  
66,0.12282,0.12123,0.1209,0.35589,0.21534,0.22071,0.20378,0.18234,0.22  
133,0.1932,0.20501,0.189,0.20319,0.21466,0.20735,0.20778,0.19831,0.228  
29,0.19922,0.20963,0.20651,0.20459,0.12145,0.12177,0.12259,0.12014,0.1  
1743,0.11405,0.11711,0.12264,0.12681,0.12559,0.12063,0.12145,0.11843,0  
.12934,0.14618,0.11949,0.10629,0.041406,0.19553,0.20633,0.20411,0.1975  
1,0.19606,0.17826,0.1982,0.24289,0.19778,0.26527,0.23109,0.17235,0.180  
31,0.2098,0.21218,0.19908,0.19064,0.18726,0.20141,0.12057,0.12237,0.12  
437,0.12186,0.12014,0.097217,0.12223,0.11298,0.12638,0.11792,0.13224,0  
.118,0.12018,0.12487,0.12165,0.12008,0.12048,0.042802,0.21747,0.20589,  
0.20623,0.23868,0.19948,0.19385,0.18521,0.17325,0.15911,0.21201,0.1993  
3,0.23305,0.16671,0.19719,0.19635,0.2108,0.21426,0.22737,0.11873,0.121  
1,0.1214,0.12433,0.12265,0.10532,0.14065,0.12501,0.12671,0.12183,0.128  
19,0.12207,0.12175,0.12342,0.11355,0.12302,0.11709,0.1199,0.042546,0.2  
1189,0.25042,0.19731,0.22173,0.22146,0.20114,0.18794,0.21299,0.19068,0  
.20332,0.19859,0.19749,0.1893,0.2155,0.21714,0.20568,0.19532,0.19784,0  
.13466,0.12213,0.12089,0.12155,0.12035,0.14549,0.11498,0.11999,0.1185,  
0.12309,0.12157,0.12031,0.109,0.11593,0.11423,0.12191,0.13336,0.041883  
,0.041762,0.042817,0.20098,0.20742,0.21581,0.19967,0.21447,0.20042,0.1  
9156,0.19097,0.21476,0.18177,0.18632,0.21301,0.18374,0.20459,0.22169,0  
.10254,0.12472,0.12867,0.12232,0.12234,0.12227,0.11437,0.12582,0.10887  
,0.12827,0.12205,0.1123,0.11862,0.11867,0.11411,0.11404,0.12139,0.1192  
1,0.041971,0.043239,0.041783,0.045793,0.14856,0.21386,0.18295,0.169,0.  
20945,0.20495,0.24638,0.24624,0.22098,0.2115,0.19563,0.20182,0.13795,0  
.11587,0.10437,0.11366,0.13523,0.13512,0.13952,0.11219,0.12566,0.12277  
,0.13549,0.13132,0.1221,0.13716,0.12072,0.1232,0.12553,0.12875,0.10747  
,0.12193,0.040522,0.043763,0.042732,0.042713,0.042577,0.042584,0.21787  
,0.209,0.25919,0.21151,0.18639,0.19444,0.19176,0.20637,0.11155,0.10318  
,0.093695,0.12186,0.12117,0.11916,0.11887,0.12543,0.093901,0.12267,0.1  
3042,0.15949,0.12004,0.11917,0.14754,0.12584,0.12184,0.0956,0.12277,0.  
11795,0.11793,0.11417,0.12573,0.043385,0.044449,0.040031,0.044096,0.04

1399,0.043355,0.23415,0.21046,0.22473,0.20434,0.21306,0.043343,0.04147  
8,0.12195,0.11927,0.12119,0.12145,0.12173,0.12145,0.11893,0.13083,0.11  
872,0.11303,0.11869,0.11716,0.12705,0.12147,0.11406,0.12157,0.1235,0.1  
1695,0.12319,0.12677,0.12498,0.042773,0.042999,0.040108,0.043564,0.042  
527,0.044006,0.044594,0.042378,0.041245,0.041875,0.20957,0.18091,0.039  
902,0.041386,0.042079,0.042741,0.13204,0.097276,0.12216,0.12335,0.1241  
,0.13353,0.12357,0.11849,0.12296,0.11522,0.11207,0.13708,0.12776,0.119  
07,0.12512,0.12268,0.11231,0.13156,0.12843,0.041624,0.042284,0.043212,  
0.043762,0.042861,0.042707,0.0425,0.042724,0.043071,0.042471,0.042332,  
0.045509,0.042633,0.042482,0.043897,0.040442,0.040589,0.1186,0.12802,0  
.1101,0.1021,0.12062,0.11497,0.12454,0.11014,0.11789,0.12214,0.11818,0  
.12568,0.1125,0.12107,0.12814,0.122,0.041288,0.043078,0.043708,0.04369  
8,0.043828,0.043414,0.041564,0.044477,0.043744,0.041853,0.04541,0.0432  
65,0.042148,0.04159,0.045026,0.041385,0.043417,0.041102,0.0449,0.11181  
,0.11448,0.14309,0.12227,0.11145,0.12175,0.12175,0.12771,0.11553,0.126  
13,0.12672,0.12955,0.10879,0.042309,0.042982,0.043731,0.043537,0.04259  
1,0.042987,0.042315,0.043622,0.041661,0.041702,0.04212,0.045468,0.0424  
5,0.041964,0.041699,0.041169,0.043984,0.042787,0.042036,0.042426,0.041  
771,0.11588,0.12276,0.1303,0.1228,0.13164,0.1088,0.11542,0.12139,0.121  
14,0.041831,0.04209,0.042833,0.042495,0.0415,0.042436,0.04171,0.043003  
,0.043184,0.043261,0.043468,0.04105,0.044668,0.041934,0.042,0.042532,0  
.042796,0.039925,0.04145,0.042949,0.04253,0.043398,0.044462,0.040943,0  
.044201,0.11414,0.13273,0.1212,0.10522,0.040728,0.042329,0.041855,0.04  
3525,0.041765,0.041171,0.042967,0.042483,0.043624,0.044665,0.044073,0.  
042387,0.042175,0.041567,0.044228,0.042034,0.04221,0.042277,0.042079,0  
.04163,0.044784,0.041007,0.04108,0.041523,0.044198,0.041482,0.044684,0  
.043154,0.042274,0.045217,0.044191,0.04082,0.044732,0.043088,0.041982,  
0.040856,0.0415,0.041572,0.041338,0.04339,0.043653,0.04427,0.044426,0.  
042511,0.041302,0.042378,0.044751,0.041038,0.043879,0.043763,0.039985,  
0.042707,0.04074,0.04353,0.043673,0.044499,0.043333,0.042942,0.043261,  
0.042033,0.042866,0.043326,0.044195,0.043366,0.043871,0.041487,0.04316  
8,0.042319,0.043926,0.043593,0.043719,0.046022,0.04258,0.044359,0.0405  
52,0.043131,0.045195,0.043351,0.04118,0.043787,0.041328,0.043206,0.043  
435,0.040949,0.043517,0.040128,0.042366,0.042781,0.042128,0.041471,0.0  
42425,0.04281,0.042842,0.040539,0.044481,0.041962,0.042697,0.043625,0.  
042735,0.045057,0.043375,0.044698,0.042407,0.039877,0.043021,0.044357,  
0.042028,0.04099,0.044743,0.042289,0.040901,0.040615,0.042386,0.044848  
,0.043001,0.040824,0.040813,0.042478,0.041673,0.043562,0.041575,0.0427  
96,0.042125,0.043332,0.042695,0.042294,0.04434,0.042634,0.04322,0.0416  
34,0.039921,0.044467,0.04219,0.043315,0.042442,0.043219,0.043974,0.041  
811,0.044799,0.041458,0.042555,0.041437,0.043991,0.039993,0.044374,0.0  
43172,0.0429,0.041045,0.043958,0.042422,0.040961,0.043196,0.041854,0.0  
41757,0.0432,0.044342,0.042094,0.043152,0.040589,0.040271,0.04326,0.04  
1883,0.043433,0.042376,0.041787,0.0434,0.042658,0.043739,0.043117,0.04  
4582,0.042006,0.043503,0.043721,0.041459,0.041721,0.044405,0.040922,0.  
040523,0.04176,0.043201,0.043666,0.042248,0.043881,0.042138,0.04255,0.  
041804,0.041756,0.043973,0.041327,0.044201,0.04341,0.041834,0.043528,0  
.041852,0.044942  
0.19846,0.19923,0.19861,0.20259,0.20233,0.20386,0.20174,0.20102,0.2046  
1,0.20213,0.20244,0.20039,0.20219,0.20098,0.20376,0.20132,0.2029,0.204  
79,0.20416,0.1995,0.30266,0.27408,0.33251,0.26601,0.20246,0.20382,0.20  
605,0.20088,0.19889,0.20408,0.20103,0.20281,0.20108,0.20088,0.20578,0.



20015,0.20011,0.19937,0.20229,0.33941,0.26925,0.29122,0.28239,0.28845,  
0.26789,0.27266,0.20127,0.20035,0.2053,0.2025,0.19955,0.20463,0.20115,  
0.20199,0.19877,0.20194,0.20243,0.20178,0.20008,0.20361,0.20346,0.3871  
7,0.35475,0.27099,0.3112,0.26802,0.29197,0.28349,0.27868,0.27383,0.264  
73,0.20218,0.20258,0.20479,0.20152,0.20161,0.2028,0.20227,0.20082,0.20  
229,0.20227,0.2026,0.20083,0.20241,0.20121,0.20383,0.34426,0.3418,0.38  
497,0.24583,0.32203,0.28221,0.28932,0.28648,0.28658,0.30043,0.29295,0.  
28591,0.20342,0.2036,0.20174,0.20241,0.2042,0.20354,0.20173,0.19866,0.  
2039,0.20412,0.20244,0.20267,0.20249,0.20384,0.20174,0.20339,0.34769,0  
.3693,0.37323,0.37888,0.29481,0.28205,0.26133,0.2825,0.27587,0.28269,0  
.2719,0.28637,0.28983,0.29334,0.20357,0.20389,0.20328,0.20373,0.2012,0  
.20241,0.20108,0.20082,0.20218,0.20175,0.20227,0.20214,0.19962,0.20464  
,0.20035,0.20164,0.32029,0.36895,0.37791,0.35815,0.35164,0.37442,0.278  
09,0.27145,0.27151,0.29282,0.27764,0.29242,0.26692,0.2809,0.26815,0.27  
82,0.20026,0.20237,0.20196,0.20078,0.20179,0.2029,0.20215,0.20382,0.20  
082,0.20306,0.20367,0.20617,0.20373,0.20115,0.20362,0.2016,0.20536,0.3  
6805,0.36753,0.35523,0.37118,0.37074,0.40469,0.28505,0.25478,0.28635,0  
.30152,0.29913,0.29469,0.2986,0.28199,0.2815,0.27074,0.29098,0.20087,0  
.20263,0.20077,0.19883,0.20031,0.19994,0.19963,0.2038,0.19918,0.20426,  
0.20161,0.19709,0.20407,0.12758,0.10654,0.12754,0.20303,0.32586,0.3801  
4,0.3288,0.38372,0.36048,0.36528,0.34384,0.29259,0.27927,0.29748,0.282  
66,0.30612,0.26998,0.27935,0.28107,0.28266,0.26938,0.27585,0.19998,0.2  
0036,0.20377,0.20221,0.20171,0.20241,0.20277,0.19905,0.19993,0.2032,0.  
20173,0.10037,0.12015,0.12165,0.12237,0.12068,0.12745,0.20273,0.33882,  
0.3692,0.35523,0.37094,0.34926,0.36412,0.36061,0.28175,0.29708,0.26464  
,0.30479,0.27127,0.29615,0.28923,0.2924,0.29511,0.28117,0.25622,0.2010  
7,0.2045,0.20133,0.20146,0.19817,0.202,0.20322,0.20225,0.2026,0.12218,  
0.1235,0.13493,0.12169,0.12129,0.12135,0.12147,0.12983,0.12043,0.19999  
,0.34812,0.34776,0.38316,0.35997,0.37661,0.37974,0.37766,0.27543,0.281  
37,0.28616,0.29424,0.28808,0.27635,0.28387,0.2664,0.28474,0.27471,0.27  
38,0.26349,0.20028,0.19956,0.20292,0.20451,0.20256,0.20404,0.11342,0.1  
2297,0.12708,0.1214,0.1394,0.12492,0.11462,0.12311,0.12314,0.14059,0.1  
2371,0.12239,0.37126,0.39015,0.36166,0.38484,0.36309,0.36877,0.3581,0.  
27956,0.28371,0.28774,0.28138,0.28782,0.30151,0.28908,0.28308,0.29256,  
0.2971,0.29199,0.26735,0.20288,0.20046,0.20357,0.11673,0.14053,0.10994  
,0.11006,0.12606,0.11895,0.12281,0.12219,0.12437,0.12465,0.12088,0.132  
73,0.12741,0.14822,0.12351,0.35167,0.34341,0.37877,0.36021,0.36573,0.3  
8065,0.38596,0.34008,0.35324,0.28105,0.27991,0.27572,0.28673,0.26884,0  
.27387,0.27338,0.28104,0.28004,0.2862,0.30106,0.12125,0.12359,0.11966,  
0.12069,0.12345,0.12224,0.11733,0.12381,0.12677,0.11932,0.10776,0.1208  
5,0.12189,0.1214,0.12146,0.10384,0.11634,0.12631,0.36268,0.36646,0.403  
97,0.35869,0.35036,0.36217,0.38236,0.34186,0.36223,0.30935,0.27468,0.2  
2419,0.19002,0.21331,0.19972,0.20539,0.21111,0.22182,0.17956,0.20615,0  
.12452,0.13707,0.11265,0.1077,0.12041,0.13942,0.1259,0.12119,0.12871,0  
.1021,0.11978,0.12215,0.12031,0.12085,0.12699,0.11702,0.12111,0.11879,  
0.36839,0.36874,0.37759,0.41249,0.36145,0.34437,0.38938,0.3415,0.35451  
,0.1876,0.20492,0.2027,0.2166,0.19579,0.23698,0.19038,0.22985,0.20856,  
0.2026,0.19046,0.12191,0.12559,0.1351,0.12274,0.11767,0.14207,0.14406,  
0.12177,0.13685,0.12507,0.12186,0.12669,0.13671,0.11254,0.11104,0.1227  
7,0.11355,0.12176,0.35546,0.38066,0.37065,0.37872,0.36535,0.37328,0.37  
899,0.19847,0.20385,0.24439,0.1885,0.20594,0.2065,0.20627,0.19571,0.20  
134,0.20371,0.20473,0.21191,0.20334,0.12049,0.12186,0.13208,0.11439,0.

12267,0.11933,0.12291,0.14083,0.12217,0.12267,0.11362,0.12488,0.11936,  
0.12191,0.11513,0.11434,0.11744,0.13527,0.37377,0.3754,0.36058,0.39156  
,0.3872,0.3567,0.21708,0.22129,0.21023,0.18485,0.19849,0.22077,0.19517  
,0.20435,0.20165,0.21737,0.20386,0.209,0.20635,0.23682,0.11884,0.12315  
,0.12054,0.12124,0.1128,0.12088,0.11752,0.11926,0.12644,0.12686,0.1438  
3,0.12281,0.12117,0.11507,0.13513,0.12861,0.10846,0.12243,0.35262,0.36  
766,0.39202,0.35765,0.34555,0.23306,0.2086,0.20953,0.20977,0.1824,0.16  
634,0.1922,0.22029,0.21535,0.2014,0.19975,0.21493,0.19953,0.2072,0.210  
47,0.13744,0.10804,0.13796,0.1167,0.10269,0.12099,0.11726,0.13621,0.11  
073,0.12138,0.1133,0.12266,0.12271,0.11951,0.12519,0.13386,0.11318,0.1  
2216,0.36041,0.35332,0.36268,0.20665,0.22037,0.19415,0.21611,0.19551,0  
.21623,0.18238,0.20122,0.22323,0.19283,0.19097,0.22853,0.19673,0.21216  
,0.20415,0.18577,0.18579,0.11832,0.1218,0.10884,0.12138,0.11421,0.1304  
3,0.13061,0.12425,0.11997,0.10872,0.12264,0.12383,0.12478,0.13741,0.11  
285,0.1224,0.12147,0.12165,0.35874,0.20673,0.21668,0.20233,0.1785,0.21  
411,0.19032,0.20158,0.18891,0.19788,0.21198,0.20243,0.20877,0.19484,0.  
22762,0.19896,0.20937,0.20271,0.20465,0.12173,0.12061,0.12212,0.12066,  
0.11706,0.11466,0.1167,0.12301,0.1264,0.12621,0.12074,0.12132,0.11832,  
0.12988,0.14639,0.11951,0.10643,0.040848,0.19584,0.19918,0.19957,0.196  
91,0.19479,0.17378,0.19219,0.24416,0.19566,0.25801,0.23127,0.17289,0.1  
8061,0.2059,0.20909,0.19208,0.19454,0.19151,0.19822,0.12024,0.12262,0.  
12481,0.12223,0.11962,0.096194,0.12277,0.1123,0.12671,0.11839,0.13211,  
0.11837,0.11974,0.12596,0.12245,0.11944,0.12035,0.041868,0.22532,0.199  
75,0.20497,0.23971,0.20107,0.18799,0.18706,0.16885,0.15763,0.21296,0.1  
9966,0.23166,0.16737,0.19168,0.19657,0.21163,0.21153,0.23145,0.11905,0  
.12109,0.12132,0.12434,0.12318,0.10495,0.14127,0.12504,0.12696,0.12242  
,0.12848,0.12234,0.12098,0.12276,0.11384,0.12199,0.11719,0.12001,0.041  
487,0.22184,0.24644,0.20224,0.22548,0.21964,0.19909,0.18625,0.20988,0.  
19207,0.21006,0.19248,0.19218,0.19209,0.21573,0.21587,0.20218,0.1885,0  
.19824,0.13426,0.12166,0.12033,0.12206,0.12036,0.14628,0.11479,0.11983  
,0.11805,0.12332,0.12175,0.12082,0.10912,0.11583,0.11389,0.1217,0.1336  
,0.040544,0.040583,0.042366,0.20123,0.20592,0.21474,0.19816,0.21103,0.  
19639,0.19282,0.19544,0.21201,0.18139,0.18397,0.21185,0.18256,0.19867,  
0.21641,0.10229,0.12448,0.12909,0.12253,0.12245,0.12218,0.1137,0.12599  
,0.10874,0.12818,0.12243,0.11178,0.11822,0.1189,0.11465,0.11436,0.1210  
5,0.11901,0.04126,0.041743,0.04189,0.044652,0.15248,0.21406,0.18377,0.  
16258,0.20953,0.20578,0.2361,0.23836,0.22563,0.2102,0.19346,0.20168,0.  
13873,0.11617,0.10404,0.11314,0.13579,0.13557,0.13942,0.1117,0.1268,0.  
12303,0.13555,0.13184,0.12242,0.13744,0.12083,0.12279,0.12585,0.12987,  
0.10815,0.12216,0.039863,0.043077,0.041994,0.04104,0.041086,0.041294,0  
.21989,0.20381,0.25944,0.20793,0.18674,0.19268,0.18426,0.20037,0.11168  
,0.10338,0.092841,0.12209,0.12127,0.11979,0.11959,0.12507,0.093652,0.1  
2343,0.13018,0.15979,0.11997,0.11922,0.14781,0.12624,0.12232,0.095393,  
0.12305,0.11763,0.11856,0.11347,0.12625,0.041611,0.042936,0.039196,0.0  
42575,0.040683,0.042347,0.2223,0.20774,0.22903,0.19561,0.21025,0.04226  
3,0.040227,0.1219,0.11995,0.1215,0.12133,0.12154,0.1227,0.11949,0.1313  
3,0.11987,0.11262,0.11889,0.11671,0.1265,0.12208,0.11366,0.12241,0.123  
36,0.11754,0.12477,0.12613,0.12475,0.041406,0.042274,0.038858,0.042967  
,0.041324,0.043183,0.042791,0.041655,0.039886,0.040595,0.20364,0.17991  
,0.040134,0.039408,0.040835,0.041617,0.13173,0.096802,0.12237,0.12371,  
0.12457,0.13291,0.12315,0.11893,0.12338,0.11584,0.1118,0.13773,0.12883  
,0.11898,0.12559,0.12275,0.11209,0.13139,0.12854,0.04053,0.041652,0.04

3643,0.042233,0.042607,0.041781,0.042078,0.041099,0.041705,0.041625,0.042298,0.044298,0.040511,0.041314,0.043329,0.039145,0.039952,0.11824,0.12807,0.11065,0.10235,0.12113,0.11535,0.12478,0.11018,0.11765,0.12219,0.1179,0.12596,0.11253,0.12102,0.12913,0.12245,0.040564,0.040972,0.043013,0.042077,0.042414,0.042809,0.040427,0.043607,0.042977,0.040005,0.044466,0.042445,0.041834,0.040153,0.043321,0.040503,0.042468,0.040136,0.043884,0.1121,0.11492,0.14343,0.12251,0.11111,0.1222,0.12174,0.12781,0.11539,0.1264,0.12655,0.13003,0.10813,0.040775,0.04279,0.042725,0.04259,0.041938,0.041592,0.041682,0.042505,0.041063,0.040467,0.041973,0.04511,0.042228,0.04123,0.040032,0.041839,0.04223,0.041268,0.039933,0.041378,0.041348,0.11583,0.1229,0.13097,0.12226,0.13178,0.10849,0.11618,0.12121,0.12159,0.041351,0.041407,0.041199,0.041768,0.041877,0.040533,0.041024,0.04268,0.041851,0.042413,0.041446,0.040105,0.042757,0.040835,0.041421,0.041814,0.0412,0.039717,0.040453,0.042556,0.042562,0.042757,0.042457,0.039091,0.042876,0.11386,0.13295,0.12149,0.10539,0.040052,0.040312,0.040914,0.043464,0.041098,0.04078,0.042131,0.042205,0.04296,0.043387,0.043171,0.041117,0.040867,0.041368,0.043047,0.041029,0.042915,0.040966,0.041152,0.040646,0.043247,0.039417,0.040365,0.040662,0.043712,0.041163,0.0437,0.042795,0.042078,0.044481,0.043433,0.040095,0.043016,0.042093,0.040543,0.040506,0.040768,0.0416,0.042022,0.04276,0.042301,0.042438,0.043252,0.041238,0.040589,0.042484,0.043509,0.0404,0.043426,0.043037,0.039264,0.041851,0.040036,0.041314,0.043357,0.0427,0.041348,0.041738,0.041926,0.040336,0.042086,0.042436,0.042732,0.043165,0.042737,0.040635,0.042326,0.041176,0.041813,0.042197,0.043281,0.044444,0.041371,0.04302,0.040288,0.041993,0.043783,0.043208,0.040143,0.043048,0.04111,0.042533,0.0428,0.040724,0.042818,0.039695,0.041498,0.041689,0.041343,0.041044,0.041952,0.041706,0.042527,0.040298,0.043122,0.04019,0.041448,0.043416,0.042012,0.043863,0.042189,0.042674,0.041439,0.039492,0.04203,0.042408,0.040617,0.040001,0.04399,0.041395,0.039978,0.040233,0.041453,0.044484,0.042577,0.040127,0.039106,0.041185,0.041507,0.042097,0.040864,0.041835,0.040538,0.041664,0.041818,0.041934,0.042931,0.041352,0.04206,0.041487,0.039636,0.042336,0.04104,0.041817,0.042074,0.04243,0.042631,0.041319,0.043794,0.041381,0.041488,0.041028,0.042954,0.039052,0.04267,0.041568,0.042335,0.041609,0.042956,0.041696,0.039912,0.04175,0.040894,0.040603,0.042017,0.042707,0.041717,0.041324,0.04084,0.040264,0.042985,0.040392,0.042018,0.041782,0.040867,0.042785,0.041989,0.043215,0.041657,0.043265,0.040608,0.04167,0.042306,0.040341,0.040426,0.042501,0.039538,0.040031,0.040778,0.042256,0.043201,0.042393,0.042643,0.040916,0.041952,0.040024,0.040357,0.042991,0.039367,0.043421,0.042487,0.041533,0.041979,0.041768,0.044271  
0.19866,0.20036,0.20016,0.20462,0.20155,0.20449,0.20326,0.20233,0.20531,0.20265,0.20299,0.20295,0.20367,0.2012,0.20449,0.20125,0.20458,0.20578,0.2048,0.20157,0.29409,0.27187,0.33503,0.267,0.20387,0.2053,0.20558,0.2013,0.19979,0.2048,0.20281,0.20365,0.20188,0.20279,0.2075,0.20039,0.20081,0.20018,0.20269,0.34604,0.2731,0.28825,0.28396,0.28812,0.27186,0.27489,0.20165,0.20175,0.20427,0.20267,0.20073,0.20547,0.20223,0.20168,0.20098,0.20189,0.20422,0.20283,0.20263,0.20396,0.20444,0.38283,0.36443,0.2704,0.31054,0.26598,0.28784,0.27995,0.28023,0.27203,0.26245,0.20344,0.20352,0.20697,0.20343,0.20176,0.20342,0.20435,0.20132,0.20465,0.20411,0.20368,0.20222,0.20422,0.20213,0.20475,0.34005,0.345,0.3807,0.24585,0.3167,0.28754,0.29131,0.2836,0.29143,0.29952,0.29594,0.28117,0.20353,0.20346,0.20229,0.20151,0.20664,0.20429,0.20289,0.2006,0.20401,

0.2047,0.20378,0.20371,0.20241,0.20547,0.20277,0.20391,0.35082,0.36798  
,0.36387,0.37674,0.29537,0.28721,0.26135,0.2817,0.27447,0.27339,0.2705  
3,0.28687,0.29079,0.28705,0.20419,0.20606,0.20376,0.20544,0.20324,0.20  
302,0.20144,0.20038,0.20303,0.20335,0.20332,0.2026,0.19991,0.20455,0.2  
0235,0.20221,0.33207,0.36704,0.36043,0.33424,0.3661,0.37019,0.27601,0.  
26738,0.27813,0.29642,0.27614,0.29101,0.2681,0.27528,0.27015,0.278,0.2  
0143,0.20282,0.20283,0.20067,0.20259,0.20443,0.20239,0.20474,0.20242,0  
.20406,0.20513,0.20565,0.20562,0.20185,0.20457,0.20328,0.20631,0.3599,  
0.38168,0.36074,0.37481,0.37364,0.39356,0.27834,0.26034,0.28253,0.3070  
1,0.29225,0.2955,0.29367,0.28051,0.27769,0.27343,0.29072,0.20158,0.203  
69,0.2025,0.19909,0.20154,0.20131,0.20016,0.20478,0.20053,0.2044,0.202  
06,0.19834,0.20424,0.12797,0.10735,0.12811,0.20447,0.32564,0.36997,0.3  
2449,0.38527,0.34719,0.36203,0.34522,0.29593,0.28126,0.29497,0.27823,0.  
.30797,0.26912,0.27758,0.27633,0.28138,0.26926,0.2728,0.20131,0.20187,  
0.20418,0.20293,0.20389,0.20421,0.20457,0.2,0.20175,0.20457,0.20349,0.  
1003,0.11986,0.12189,0.12269,0.12115,0.12756,0.2041,0.33596,0.36187,0.  
3627,0.37377,0.34637,0.35324,0.35374,0.288,0.3024,0.2709,0.29679,0.266  
76,0.29736,0.28308,0.29184,0.29128,0.27366,0.25424,0.20249,0.20373,0.2  
0327,0.20239,0.19989,0.20374,0.20377,0.20377,0.20549,0.12226,0.12334,0  
.13566,0.12267,0.12026,0.12165,0.12164,0.12986,0.1203,0.20152,0.345,0.  
34334,0.38251,0.35104,0.36958,0.38209,0.3713,0.26924,0.27813,0.28618,0  
.29427,0.28471,0.27284,0.28098,0.264,0.27937,0.26919,0.27179,0.26307,0  
.20172,0.20075,0.20363,0.20587,0.20217,0.20609,0.11318,0.12336,0.12717  
,0.12156,0.13991,0.12556,0.11466,0.12275,0.1232,0.14037,0.12527,0.1222  
,0.35431,0.38849,0.35669,0.36461,0.35705,0.35687,0.36477,0.27473,0.281  
57,0.28949,0.27623,0.28404,0.29548,0.28956,0.28007,0.29053,0.29136,0.2  
8889,0.27017,0.20421,0.2014,0.20458,0.11679,0.14183,0.11022,0.11069,0.  
12625,0.11862,0.12297,0.12249,0.12443,0.12476,0.12129,0.13321,0.12763,  
0.14869,0.12393,0.34384,0.34459,0.3763,0.36172,0.36235,0.37201,0.38152  
,0.34007,0.35152,0.28889,0.28357,0.27523,0.28864,0.2655,0.27831,0.2755  
4,0.28148,0.27588,0.28842,0.29765,0.12092,0.12323,0.12031,0.1206,0.123  
48,0.12219,0.11768,0.12471,0.12666,0.11977,0.10806,0.12076,0.12169,0.1  
2111,0.12171,0.10411,0.11639,0.12693,0.3712,0.3664,0.40578,0.36751,0.3  
4588,0.36386,0.37864,0.34573,0.37436,0.29765,0.27193,0.22509,0.1881,0.  
21313,0.19561,0.20619,0.21198,0.2183,0.18092,0.20588,0.12483,0.13729,0  
.11312,0.10782,0.1214,0.14002,0.12601,0.1209,0.12824,0.10227,0.11955,0  
.12275,0.12027,0.12106,0.12739,0.11732,0.12124,0.11889,0.35936,0.35899  
,0.38188,0.40812,0.3583,0.34816,0.37614,0.34838,0.34677,0.18552,0.2032  
8,0.20664,0.21437,0.19477,0.23447,0.19224,0.22712,0.20967,0.20265,0.18  
941,0.12157,0.12673,0.13555,0.12253,0.11752,0.14259,0.1441,0.12203,0.1  
3602,0.12484,0.12236,0.12731,0.13734,0.11295,0.11102,0.12248,0.11387,0  
.12159,0.36462,0.36219,0.36939,0.38107,0.36108,0.36941,0.38023,0.19797  
,0.20706,0.24184,0.18435,0.21122,0.20756,0.20181,0.19359,0.1975,0.2082  
9,0.20545,0.21214,0.19835,0.12105,0.12209,0.13203,0.11496,0.12283,0.11  
942,0.12286,0.14124,0.12273,0.12257,0.11342,0.12473,0.11961,0.12203,0.  
11538,0.11463,0.11805,0.13556,0.37438,0.37947,0.35045,0.38677,0.37463,  
0.34537,0.22224,0.22458,0.19921,0.18477,0.18638,0.21924,0.19724,0.2074  
4,0.2025,0.21714,0.20301,0.20976,0.20784,0.23402,0.11936,0.12345,0.120  
9,0.12233,0.11274,0.12134,0.11704,0.11963,0.127,0.12711,0.14319,0.1223  
9,0.1213,0.11576,0.13528,0.1289,0.10819,0.12185,0.35579,0.35795,0.3801  
5,0.36516,0.35263,0.21918,0.20366,0.20772,0.20977,0.17767,0.16403,0.19  
578,0.22007,0.21049,0.1954,0.19856,0.21467,0.199,0.20721,0.21246,0.137

54,0.10796,0.13802,0.11703,0.10233,0.12162,0.11726,0.13625,0.11017,0.1  
2124,0.11303,0.12266,0.12283,0.12007,0.12546,0.13441,0.11353,0.12184,0  
.36029,0.34184,0.37823,0.20219,0.22108,0.18964,0.20911,0.18987,0.21011  
,0.18446,0.20353,0.21724,0.19658,0.18971,0.22844,0.19301,0.21108,0.202  
54,0.18689,0.18307,0.11864,0.12228,0.10894,0.12156,0.11507,0.12993,0.1  
3117,0.12377,0.12029,0.10851,0.12317,0.12392,0.12535,0.13819,0.11286,0  
.12269,0.12162,0.12124,0.34942,0.20009,0.21185,0.20138,0.17816,0.209,0  
.19396,0.20019,0.19176,0.2029,0.21484,0.20192,0.20092,0.1933,0.22382,0  
.19928,0.20711,0.1991,0.20379,0.12262,0.12057,0.1217,0.12061,0.11627,0  
.11501,0.11731,0.12332,0.12729,0.12615,0.12175,0.12198,0.11886,0.12991  
,0.14686,0.11938,0.10691,0.040488,0.19102,0.19126,0.20102,0.18903,0.19  
007,0.1748,0.19604,0.24146,0.19641,0.26099,0.22456,0.17156,0.18074,0.2  
0639,0.21039,0.193,0.19461,0.19321,0.19998,0.12034,0.12307,0.12489,0.1  
2248,0.11969,0.09622,0.12324,0.11281,0.12712,0.11882,0.13237,0.11822,0  
.11979,0.12634,0.12311,0.12013,0.12028,0.041212,0.22107,0.20487,0.2074  
1,0.23662,0.20773,0.18619,0.18611,0.17009,0.14988,0.20369,0.19604,0.22  
866,0.16771,0.19214,0.1928,0.20947,0.20929,0.2256,0.11871,0.12048,0.12  
178,0.12475,0.12359,0.10515,0.14253,0.12506,0.1275,0.12302,0.12851,0.1  
227,0.12165,0.1227,0.1142,0.12217,0.11771,0.12035,0.040464,0.22052,0.2  
5172,0.20476,0.21651,0.21451,0.19351,0.18274,0.20247,0.19209,0.20723,0  
.19433,0.19169,0.19225,0.21404,0.21408,0.1934,0.19252,0.19716,0.13497,  
0.12147,0.12203,0.12187,0.12127,0.14602,0.11518,0.11972,0.11871,0.1230  
4,0.12165,0.12126,0.10941,0.11588,0.11354,0.12233,0.1341,0.039831,0.04  
0381,0.041444,0.20022,0.20341,0.20434,0.19209,0.20189,0.1953,0.1885,0.  
19077,0.20983,0.18498,0.18175,0.20881,0.18254,0.19799,0.21236,0.10236,  
0.12448,0.12974,0.12258,0.12232,0.12238,0.11393,0.12657,0.10862,0.1285  
5,0.12214,0.11135,0.11913,0.11935,0.11428,0.1146,0.12163,0.11938,0.041  
304,0.040706,0.040837,0.044103,0.14999,0.21228,0.1834,0.16698,0.21027,  
0.20399,0.22546,0.2299,0.21964,0.20937,0.19684,0.20498,0.13886,0.11617  
,0.10403,0.11325,0.13625,0.13552,0.14012,0.11154,0.12689,0.12362,0.135  
03,0.13215,0.12254,0.13784,0.12071,0.1226,0.12599,0.13018,0.10785,0.12  
266,0.039433,0.042274,0.040316,0.039594,0.040893,0.040094,0.20694,0.19  
896,0.25798,0.20567,0.18821,0.19888,0.18083,0.19801,0.11235,0.1029,0.0  
93145,0.1222,0.12114,0.12024,0.12012,0.12611,0.093452,0.12426,0.13096,  
0.1598,0.12063,0.11954,0.1486,0.12596,0.12268,0.096076,0.12365,0.11767  
,0.11859,0.11359,0.12687,0.040263,0.043023,0.039106,0.041483,0.039817,  
0.041413,0.21606,0.20751,0.2298,0.18949,0.20446,0.042201,0.040527,0.12  
317,0.12062,0.12246,0.12146,0.12192,0.12261,0.11898,0.13092,0.1209,0.1  
1269,0.11866,0.1174,0.12677,0.1227,0.11378,0.12207,0.12343,0.11778,0.1  
2475,0.12685,0.12496,0.040969,0.040662,0.038631,0.04194,0.04104,0.0418  
9,0.042457,0.04019,0.03982,0.039448,0.19916,0.1831,0.038943,0.039657,0  
.039802,0.04051,0.13166,0.097061,0.12264,0.12463,0.12556,0.13347,0.123  
98,0.11872,0.12358,0.11532,0.11253,0.13855,0.1293,0.1193,0.12608,0.122  
54,0.11198,0.13128,0.12931,0.040461,0.040488,0.042792,0.040874,0.04120  
5,0.041269,0.040968,0.040726,0.041113,0.040135,0.041816,0.044009,0.040  
571,0.040423,0.042514,0.038465,0.039565,0.11854,0.12866,0.11118,0.1026  
8,0.12111,0.11632,0.12526,0.10947,0.11704,0.12246,0.11881,0.12602,0.11  
298,0.12146,0.12879,0.12291,0.039959,0.040044,0.041813,0.042212,0.0414  
59,0.042669,0.040182,0.042837,0.042603,0.038951,0.043505,0.041575,0.04  
1836,0.040946,0.042853,0.040011,0.041988,0.039046,0.043115,0.11264,0.1  
1442,0.14329,0.12308,0.11083,0.12279,0.12234,0.12863,0.11534,0.1264,0.  
12662,0.1305,0.10825,0.03958,0.042538,0.042257,0.041757,0.041454,0.040

479,0.040555,0.041277,0.040158,0.040157,0.04081,0.043599,0.041515,0.04  
0368,0.038834,0.040891,0.04184,0.041244,0.039,0.041868,0.040993,0.1150  
6,0.12344,0.1304,0.12263,0.13122,0.10815,0.11613,0.12134,0.12117,0.040  
46,0.040052,0.040329,0.040606,0.04177,0.040196,0.041196,0.040704,0.041  
174,0.041551,0.041291,0.039175,0.042118,0.040443,0.040254,0.040531,0.0  
39802,0.038589,0.040515,0.041834,0.042196,0.041672,0.041719,0.039057,0  
.042569,0.11408,0.13356,0.12231,0.10464,0.039743,0.039843,0.039707,0.0  
42908,0.039716,0.039985,0.041545,0.040439,0.041995,0.04278,0.04361,0.0  
40344,0.040699,0.041064,0.041299,0.041223,0.043101,0.040903,0.039485,0  
.040223,0.042248,0.040157,0.039719,0.039776,0.042696,0.039918,0.043352  
,0.041735,0.040477,0.043439,0.041932,0.03965,0.04188,0.041014,0.04032,  
0.040461,0.040707,0.041729,0.041437,0.041936,0.040729,0.041684,0.04356  
1,0.040364,0.040129,0.041558,0.043433,0.038912,0.042995,0.041946,0.037  
884,0.041163,0.039122,0.04016,0.042424,0.04138,0.040804,0.041176,0.041  
196,0.040497,0.042098,0.041192,0.041301,0.04176,0.041666,0.039208,0.04  
2352,0.040262,0.040654,0.041688,0.042379,0.043686,0.040145,0.042834,0.  
040216,0.041088,0.043378,0.042244,0.039707,0.042391,0.040673,0.041426,  
0.042152,0.040305,0.041839,0.038993,0.040494,0.04004,0.040957,0.039873  
,0.041259,0.042153,0.04189,0.04016,0.042517,0.0394,0.041357,0.041927,0  
.04043,0.042424,0.041689,0.041335,0.041144,0.038981,0.04055,0.041383,0  
.040719,0.039046,0.043213,0.041287,0.039461,0.039864,0.040152,0.043229  
,0.040362,0.040317,0.039012,0.040674,0.040647,0.041768,0.039126,0.0418  
42,0.040162,0.041116,0.041066,0.040912,0.04149,0.040325,0.041646,0.039  
899,0.039164,0.041173,0.041006,0.041329,0.04126,0.041983,0.041165,0.04  
1466,0.043665,0.040113,0.040776,0.03988,0.042419,0.037903,0.042209,0.0  
4144,0.041248,0.040804,0.042475,0.040067,0.039915,0.041015,0.040287,0.  
04144,0.042324,0.041956,0.041399,0.041045,0.040948,0.039604,0.043164,0  
.039945,0.040229,0.041841,0.040323,0.042392,0.042082,0.042602,0.040275  
,0.042471,0.039621,0.041214,0.041968,0.039505,0.040728,0.042236,0.0392  
06,0.038757,0.041251,0.041414,0.042654,0.04141,0.042413,0.039487,0.040  
523,0.0397,0.03892,0.042013,0.038653,0.043674,0.040559,0.041226,0.0415  
03,0.040632,0.043131  
0.20069,0.20173,0.1996,0.20534,0.20292,0.205,0.20316,0.20247,0.20578,0  
.20319,0.20424,0.20283,0.20644,0.20188,0.20625,0.20276,0.20618,0.20706  
,0.20665,0.20363,0.30359,0.26635,0.32695,0.26309,0.20433,0.2042,0.2058  
9,0.20321,0.20004,0.20376,0.20315,0.20376,0.20149,0.20285,0.20882,0.20  
168,0.20278,0.20154,0.20376,0.34404,0.27132,0.29051,0.28646,0.29305,0.  
26532,0.27434,0.20345,0.20129,0.20397,0.20276,0.20206,0.20525,0.20321,  
0.20108,0.20277,0.2035,0.20462,0.20366,0.20352,0.20536,0.20458,0.37947  
,0.35777,0.27433,0.3114,0.26848,0.28723,0.28242,0.27705,0.27058,0.2662  
9,0.20459,0.20446,0.20672,0.20475,0.20315,0.20365,0.20498,0.20263,0.20  
52,0.20399,0.20475,0.20224,0.2055,0.2022,0.20651,0.33246,0.33904,0.378  
93,0.24426,0.30496,0.29645,0.28467,0.27499,0.2882,0.30069,0.2921,0.279  
46,0.20396,0.20404,0.20345,0.20305,0.20654,0.2054,0.20327,0.20151,0.20  
537,0.20585,0.20496,0.20432,0.20231,0.20643,0.20295,0.20409,0.33307,0.  
35709,0.35301,0.3641,0.28761,0.28561,0.2602,0.28727,0.27731,0.26717,0.  
27222,0.28929,0.29106,0.28357,0.20512,0.20667,0.20312,0.20682,0.20261,  
0.20474,0.2028,0.2008,0.20357,0.20453,0.20408,0.2047,0.20166,0.20448,0  
.20371,0.20302,0.3302,0.35651,0.34984,0.34154,0.3617,0.36664,0.27234,0  
.27425,0.27765,0.29518,0.28208,0.29389,0.27439,0.27337,0.27161,0.28363  
,0.20189,0.20419,0.20426,0.20162,0.20449,0.20294,0.20411,0.20559,0.203  
11,0.20407,0.20389,0.2067,0.20686,0.20229,0.20469,0.20417,0.20878,0.37

872,0.38195,0.35197,0.36466,0.36769,0.38823,0.27611,0.26498,0.27953,0.3067,0.28061,0.29386,0.28437,0.2787,0.27563,0.27567,0.28701,0.20227,0.20708,0.20425,0.20128,0.20207,0.20068,0.20099,0.20597,0.20187,0.20472,0.20391,0.19802,0.20626,0.1282,0.10695,0.12797,0.20556,0.3396,0.37612,0.3211,0.37765,0.34819,0.36728,0.35117,0.29759,0.28094,0.29632,0.27687,0.29664,0.26685,0.27636,0.27496,0.27778,0.26675,0.26822,0.20156,0.20305,0.20403,0.20347,0.20458,0.20562,0.20553,0.20041,0.20189,0.20536,0.20451,0.10093,0.12003,0.1214,0.12248,0.1205,0.12663,0.20368,0.33066,0.38118,0.36737,0.37092,0.3387,0.36767,0.36363,0.28738,0.30057,0.27089,0.29767,0.26192,0.29131,0.28035,0.29792,0.288,0.2733,0.25553,0.20279,0.20448,0.20448,0.20309,0.20081,0.20436,0.20456,0.20594,0.20613,0.12322,0.12359,0.13598,0.12274,0.12027,0.12237,0.12195,0.13022,0.12018,0.20178,0.34495,0.33988,0.39072,0.34453,0.37442,0.38134,0.37211,0.26813,0.28476,0.28341,0.29328,0.2815,0.27424,0.27713,0.26043,0.28013,0.26813,0.26699,0.26349,0.20215,0.20274,0.20424,0.20749,0.2029,0.20725,0.11411,0.1234,0.12723,0.12166,0.13988,0.12508,0.11482,0.12325,0.12298,0.14082,0.1261,0.12288,0.33531,0.39648,0.36509,0.36767,0.36792,0.35174,0.37005,0.27125,0.27303,0.28666,0.27805,0.27694,0.2931,0.28347,0.28484,0.29948,0.28863,0.28691,0.27531,0.20405,0.20256,0.2034,0.11633,0.14247,0.11076,0.11076,0.12594,0.1192,0.12286,0.122,0.1248,0.1244,0.12167,0.13379,0.12802,0.14954,0.12385,0.33455,0.34382,0.38521,0.35696,0.3696,0.38394,0.35494,0.33114,0.33695,0.2886,0.27675,0.27317,0.28912,0.26826,0.27548,0.27046,0.27572,0.27075,0.28924,0.29848,0.12167,0.12343,0.12133,0.11998,0.12272,0.12227,0.11737,0.12519,0.12723,0.11952,0.10815,0.12015,0.12177,0.12099,0.12198,0.10447,0.11623,0.12799,0.35374,0.38098,0.40236,0.36135,0.33687,0.38727,0.37312,0.33545,0.36979,0.30001,0.27033,0.22758,0.1851,0.21497,0.19474,0.19934,0.21265,0.2194,0.18018,0.20741,0.12486,0.13678,0.11298,0.10818,0.12199,0.14083,0.12635,0.12113,0.12851,0.10187,0.11959,0.12347,0.11969,0.12165,0.12795,0.11838,0.12096,0.11884,0.35362,0.35204,0.37452,0.40205,0.35915,0.35355,0.36752,0.34905,0.34869,0.18053,0.20308,0.20815,0.21291,0.19538,0.23881,0.18658,0.22363,0.21022,0.20145,0.19176,0.12153,0.12602,0.13594,0.12232,0.117,0.14227,0.14469,0.12262,0.13652,0.12491,0.12246,0.12623,0.13765,0.11354,0.1104,0.1227,0.11424,0.12241,0.35873,0.36418,0.36488,0.37322,0.3564,0.37271,0.37249,0.19497,0.20932,0.2388,0.18205,0.21314,0.20473,0.20297,0.19158,0.19773,0.20996,0.20328,0.21399,0.19934,0.12149,0.12255,0.13274,0.11507,0.12236,0.11913,0.12305,0.14159,0.12309,0.12301,0.11443,0.12478,0.12019,0.12164,0.11532,0.11429,0.11784,0.13567,0.36861,0.37398,0.33814,0.37485,0.35646,0.34821,0.22408,0.21714,0.19154,0.1824,0.18902,0.21863,0.19819,0.20756,0.20029,0.21295,0.20167,0.20507,0.20897,0.22753,0.12001,0.12315,0.1204,0.12258,0.1126,0.12108,0.11644,0.11932,0.127,0.12667,0.14338,0.12182,0.12174,0.11563,0.13533,0.12904,0.1088,0.12196,0.35432,0.35811,0.3842,0.35766,0.34328,0.21666,0.20403,0.20077,0.21014,0.17873,0.16601,0.19739,0.22276,0.21301,0.19157,0.19348,0.21038,0.19399,0.20335,0.21145,0.13798,0.10832,0.13865,0.11732,0.10227,0.12225,0.11679,0.13631,0.10994,0.12178,0.11329,0.12317,0.12277,0.11951,0.12545,0.13383,0.11341,0.12149,0.36407,0.3387,0.37228,0.19703,0.21988,0.18192,0.20632,0.18996,0.21016,0.18342,0.20849,0.21512,0.19663,0.18918,0.22733,0.19077,0.20923,0.2006,0.19169,0.18784,0.11879,0.12193,0.10917,0.12239,0.1156,0.13012,0.13189,0.12363,0.12072,0.10863,0.12273,0.12349,0.12476,0.13943,0.11341,0.12322,0.12164,0.12183,0.32728,0.20349,0.22261,0.19955,0.17526,0.2086,0.19394,0.19639,0.19423,0.20218,0.20919,0.19915,0.19805,0.19204

,0.22456,0.19898,0.20369,0.19429,0.20785,0.12362,0.12098,0.1222,0.12059,0.11661,0.11489,0.11761,0.12312,0.12685,0.12721,0.12143,0.12281,0.11947,0.13073,0.14672,0.11954,0.10667,0.040862,0.18963,0.19032,0.19864,0.18906,0.19282,0.17228,0.19621,0.24708,0.19112,0.26119,0.22245,0.17027,0.17921,0.20359,0.21026,0.19127,0.1916,0.19095,0.20422,0.12066,0.12327,0.12484,0.12305,0.11935,0.095267,0.12298,0.11253,0.12726,0.1196,0.13315,0.11892,0.12072,0.12725,0.12289,0.12071,0.12086,0.040626,0.22737,0.20016,0.20226,0.22427,0.2007,0.18332,0.18464,0.16983,0.15657,0.2095,0.19894,0.22921,0.16747,0.19236,0.18948,0.20664,0.2062,0.22891,0.1186,0.12104,0.12178,0.12503,0.12302,0.10514,0.14211,0.12469,0.12733,0.12284,0.12769,0.12253,0.12131,0.12304,0.11412,0.12208,0.11762,0.1197,0.039727,0.21611,0.25796,0.2052,0.20735,0.20844,0.18888,0.17971,0.21004,0.18518,0.20376,0.1958,0.18936,0.19402,0.2155,0.21093,0.19482,0.18892,0.19863,0.13493,0.12186,0.12246,0.12191,0.12135,0.14659,0.11622,0.12036,0.11844,0.12343,0.12152,0.12012,0.10943,0.11509,0.11396,0.1227,0.13362,0.039574,0.040131,0.040599,0.19273,0.20198,0.2081,0.19129,0.214,0.19354,0.18798,0.19242,0.21088,0.18716,0.18538,0.20147,0.18457,0.19426,0.21361,0.10204,0.12543,0.12982,0.12255,0.12291,0.12239,0.11445,0.12675,0.10837,0.1289,0.1222,0.1109,0.11934,0.1193,0.11361,0.11462,0.12153,0.11979,0.041196,0.039731,0.040363,0.043428,0.14731,0.20788,0.18367,0.15637,0.21142,0.19888,0.22703,0.22703,0.2142,0.20447,0.19566,0.20754,0.13951,0.11666,0.10456,0.11236,0.13639,0.13628,0.14094,0.1115,0.12704,0.12456,0.13527,0.132,0.12293,0.13822,0.12087,0.12312,0.12663,0.13026,0.10808,0.12278,0.039359,0.042111,0.039918,0.040219,0.040258,0.03939,0.208,0.20011,0.24961,0.21186,0.18584,0.19785,0.17365,0.20091,0.11258,0.10316,0.093243,0.12263,0.12126,0.12028,0.1202,0.12668,0.093204,0.12444,0.13104,0.16052,0.12005,0.11972,0.14913,0.12605,0.12221,0.09594,0.12395,0.11736,0.11839,0.11359,0.12695,0.040281,0.042488,0.038987,0.042034,0.039124,0.041212,0.21855,0.20161,0.23243,0.19234,0.20291,0.041416,0.040323,0.12324,0.12092,0.12253,0.12229,0.12224,0.12254,0.1199,0.13245,0.12159,0.11253,0.11877,0.11714,0.12706,0.12234,0.11364,0.12194,0.12355,0.1178,0.12494,0.12668,0.12601,0.040312,0.039911,0.038375,0.04115,0.040907,0.041349,0.041221,0.040058,0.040319,0.039152,0.19191,0.18221,0.038264,0.038618,0.040155,0.040648,0.13225,0.096492,0.1234,0.12548,0.12643,0.13424,0.12378,0.11845,0.12416,0.1157,0.1133,0.13886,0.13071,0.11983,0.1263,0.12271,0.11221,0.13256,0.12923,0.040101,0.039785,0.04212,0.039973,0.039324,0.040916,0.04007,0.040679,0.040822,0.040209,0.041807,0.042815,0.040247,0.039975,0.041641,0.039199,0.038502,0.11844,0.12939,0.11072,0.10238,0.12119,0.11589,0.12567,0.10828,0.11683,0.12325,0.11919,0.12591,0.11252,0.122,0.12918,0.12235,0.039321,0.039862,0.041239,0.041615,0.040964,0.042325,0.04069,0.041284,0.041944,0.039505,0.042856,0.040357,0.040328,0.039795,0.041766,0.039779,0.041979,0.038751,0.041375,0.11282,0.11481,0.14356,0.12272,0.11077,0.12336,0.12298,0.12919,0.11544,0.12668,0.12683,0.13036,0.10872,0.039356,0.041615,0.04229,0.040636,0.040772,0.039713,0.040827,0.040152,0.040445,0.039474,0.04019,0.041569,0.040372,0.040763,0.038482,0.040719,0.042082,0.039904,0.038872,0.041406,0.040369,0.11501,0.12369,0.13013,0.12324,0.13127,0.10866,0.11584,0.1207,0.12084,0.039925,0.039902,0.041042,0.040464,0.04105,0.039186,0.041025,0.0396,0.040492,0.042401,0.040486,0.039027,0.042309,0.040466,0.040187,0.040627,0.039938,0.037979,0.040475,0.040435,0.041619,0.04052,0.041707,0.040789,0.042242,0.11427,0.13376,0.12302,0.10463,0.037474,0.039507,0.039243,0.042576,0.038896,0.038359,0.040669,0.040512,0.041088,0.042127



,0.042,0.040077,0.040361,0.040559,0.040298,0.040491,0.041973,0.040362,  
0.039115,0.03988,0.042012,0.03949,0.038481,0.039348,0.042104,0.039563,  
0.04239,0.041095,0.039463,0.042412,0.041623,0.040008,0.041743,0.040488  
,0.039248,0.040138,0.040001,0.04031,0.040322,0.042182,0.040611,0.04078  
3,0.042288,0.039077,0.039627,0.041928,0.042736,0.03798,0.04249,0.04203  
9,0.037886,0.041639,0.038721,0.039944,0.041846,0.040862,0.040926,0.040  
423,0.040993,0.040112,0.041428,0.040414,0.040424,0.040019,0.041104,0.0  
39716,0.042267,0.040926,0.040313,0.04042,0.04116,0.044005,0.039842,0.0  
41902,0.040391,0.040276,0.043552,0.042308,0.039207,0.04199,0.040219,0.  
040869,0.041254,0.039427,0.040523,0.038481,0.040375,0.039194,0.040485,  
0.039999,0.039779,0.041379,0.0414,0.039616,0.041519,0.038752,0.040373,  
0.041153,0.039749,0.041396,0.041098,0.04028,0.040157,0.037985,0.039863  
,0.040533,0.040613,0.039297,0.042786,0.041396,0.038958,0.039844,0.0398  
56,0.041866,0.039697,0.039951,0.03858,0.040169,0.039606,0.041362,0.039  
204,0.041101,0.039423,0.04041,0.040789,0.040549,0.040426,0.039708,0.04  
1223,0.040752,0.039258,0.042001,0.040701,0.040916,0.041033,0.040593,0.  
040966,0.040409,0.042906,0.039234,0.040558,0.039122,0.041334,0.038137,  
0.041541,0.040265,0.040151,0.039771,0.041941,0.03931,0.039065,0.040589  
,0.039977,0.040579,0.041492,0.041624,0.04103,0.039768,0.040539,0.03921  
5,0.042191,0.04016,0.040128,0.041887,0.040144,0.041825,0.042112,0.0416  
21,0.039313,0.042419,0.038983,0.039387,0.041354,0.038953,0.040788,0.04  
2043,0.038722,0.038205,0.039121,0.041399,0.042519,0.040629,0.042359,0.  
039132,0.040597,0.039438,0.039431,0.041715,0.03812,0.042653,0.041299,0  
.04006,0.040811,0.039654,0.041809  
0.2022,0.20233,0.20151,0.20515,0.20436,0.20453,0.20338,0.20369,0.20639  
,0.2031,0.20485,0.20458,0.20705,0.20352,0.20599,0.2025,0.20701,0.20795  
,0.20759,0.20544,0.30689,0.2656,0.32679,0.2678,0.20515,0.20611,0.20757  
,0.20241,0.20075,0.20536,0.20474,0.20363,0.20232,0.20266,0.21001,0.202  
52,0.20395,0.20162,0.20452,0.33586,0.26566,0.28555,0.28502,0.29029,0.2  
6028,0.27707,0.20403,0.20102,0.20493,0.20366,0.20286,0.20669,0.20456,0  
.20012,0.20255,0.20424,0.20588,0.20364,0.205,0.20563,0.20545,0.3884,0.  
35974,0.27818,0.30449,0.2662,0.27809,0.28527,0.27752,0.27419,0.2705,0.  
2043,0.20455,0.20754,0.20486,0.20415,0.20409,0.20482,0.20402,0.20591,0  
.20473,0.20493,0.20306,0.20689,0.2026,0.20694,0.33858,0.34571,0.37611,  
0.24508,0.30131,0.28961,0.27674,0.27899,0.28735,0.30209,0.28424,0.2760  
3,0.20448,0.20384,0.20531,0.20454,0.20684,0.20503,0.20394,0.20368,0.20  
581,0.20537,0.20537,0.20583,0.20397,0.20741,0.20374,0.20454,0.3255,0.3  
3834,0.35428,0.37215,0.28591,0.28583,0.25921,0.28532,0.27363,0.26695,0  
.27173,0.28612,0.28851,0.27584,0.20565,0.20826,0.2048,0.20743,0.20396,  
0.20477,0.20549,0.2024,0.20455,0.20536,0.20706,0.20603,0.20321,0.20452  
,0.20456,0.20351,0.32401,0.34751,0.35268,0.34398,0.35463,0.3561,0.2700  
4,0.2724,0.27802,0.28858,0.28047,0.2959,0.27435,0.26875,0.27063,0.2807  
3,0.20289,0.20474,0.20525,0.20271,0.20715,0.20297,0.20617,0.20622,0.20  
408,0.20446,0.20604,0.20724,0.20647,0.20273,0.20497,0.20542,0.20898,0.  
37174,0.38373,0.35028,0.35245,0.36816,0.38943,0.27199,0.26509,0.27749,  
0.30423,0.27923,0.28816,0.27901,0.27791,0.28122,0.27278,0.28429,0.2023  
,0.20877,0.20454,0.20156,0.20323,0.20203,0.20212,0.20536,0.20457,0.205  
86,0.20479,0.19914,0.20635,0.12896,0.10705,0.12891,0.20678,0.34604,0.3  
7496,0.32448,0.37,0.34608,0.35572,0.35485,0.29687,0.27734,0.2986,0.281  
41,0.29203,0.26921,0.27694,0.27425,0.2765,0.26693,0.26581,0.20317,0.20  
401,0.20536,0.20476,0.20523,0.2063,0.20637,0.20052,0.20361,0.20652,0.2  
0453,0.10104,0.12047,0.12213,0.12248,0.12198,0.12736,0.20392,0.33581,0

.36633,0.3648,0.36802,0.34042,0.34944,0.3758,0.28887,0.29405,0.26841,0.29506,0.2647,0.28829,0.27569,0.29353,0.28666,0.27572,0.25812,0.20396,0.20413,0.20535,0.20462,0.20177,0.20562,0.20676,0.20585,0.20645,0.12359,0.12398,0.13606,0.12323,0.12054,0.12208,0.12237,0.12967,0.1212,0.20204,0.34861,0.35987,0.38642,0.34662,0.3704,0.38334,0.36393,0.26325,0.28375,0.27648,0.28904,0.28162,0.27505,0.27474,0.26274,0.27526,0.268,0.27206,0.26196,0.20346,0.20276,0.20612,0.20713,0.20266,0.20817,0.11414,0.12307,0.12718,0.1218,0.1393,0.12546,0.11511,0.12301,0.12353,0.14072,0.12633,0.12243,0.33719,0.39694,0.36619,0.3516,0.354,0.35191,0.36883,0.27035,0.27762,0.28992,0.27717,0.27997,0.2862,0.29148,0.28446,0.29971,0.28464,0.28558,0.27544,0.2047,0.20421,0.20494,0.1161,0.14335,0.11019,0.1109,0.12614,0.11945,0.12279,0.12224,0.126,0.12457,0.122,0.1336,0.12754,0.15013,0.12472,0.33584,0.32994,0.38433,0.35505,0.36255,0.3787,0.3487,0.33801,0.3328,0.28531,0.27906,0.27489,0.2886,0.26577,0.27651,0.26909,0.28168,0.2686,0.28508,0.29927,0.12144,0.12267,0.12147,0.11976,0.12258,0.12256,0.11755,0.12492,0.12849,0.12028,0.10801,0.12059,0.12184,0.12106,0.12208,0.10499,0.11621,0.12718,0.35636,0.394,0.40594,0.35674,0.33023,0.38258,0.36267,0.3379,0.36823,0.29737,0.26919,0.22416,0.18562,0.21579,0.19507,0.19658,0.21239,0.22246,0.18054,0.20681,0.12528,0.13681,0.11291,0.10846,0.12287,0.14176,0.12714,0.12119,0.12914,0.10272,0.11983,0.12359,0.12013,0.12146,0.12754,0.11907,0.12107,0.1189,0.36069,0.34955,0.3688,0.40089,0.34821,0.35328,0.37235,0.34336,0.35519,0.17444,0.20073,0.20317,0.21725,0.19356,0.23621,0.18694,0.22107,0.20654,0.19957,0.19395,0.12188,0.12646,0.13655,0.1225,0.11741,0.14262,0.14558,0.12298,0.13684,0.12516,0.12242,0.12596,0.13791,0.11354,0.11097,0.12334,0.11391,0.12259,0.36092,0.37468,0.36825,0.35971,0.35297,0.37186,0.3846,0.19226,0.21183,0.24049,0.17749,0.20945,0.20261,0.2037,0.19141,0.1985,0.21263,0.2016,0.20952,0.19448,0.12138,0.12243,0.13392,0.11493,0.12245,0.11987,0.12412,0.14191,0.12233,0.12299,0.11482,0.12465,0.1214,0.12355,0.11529,0.11352,0.11822,0.13534,0.35633,0.37002,0.34624,0.36775,0.34043,0.34498,0.22009,0.21067,0.19236,0.18601,0.20027,0.22112,0.19602,0.20824,0.20398,0.20981,0.19911,0.20651,0.20637,0.22948,0.12065,0.1232,0.12061,0.12214,0.11254,0.12095,0.11685,0.11949,0.12719,0.12677,0.14373,0.12131,0.12227,0.1154,0.13586,0.12922,0.10856,0.12197,0.34945,0.36964,0.37791,0.35188,0.34394,0.22529,0.19821,0.19859,0.21015,0.18154,0.1641,0.19645,0.21923,0.20799,0.19045,0.19495,0.21286,0.19666,0.20403,0.20963,0.13837,0.10843,0.13837,0.11813,0.10227,0.12261,0.11638,0.1361,0.11049,0.1211,0.11394,0.12354,0.12397,0.11969,0.12523,0.13439,0.11376,0.12185,0.35081,0.35199,0.37568,0.19305,0.21395,0.18064,0.20621,0.18879,0.20923,0.18585,0.20838,0.21216,0.19747,0.1883,0.22186,0.19014,0.20517,0.19964,0.18984,0.1904,0.1185,0.12231,0.10885,0.12234,0.11543,0.13006,0.13205,0.12376,0.12054,0.10872,0.12262,0.12412,0.1255,0.13959,0.11347,0.12366,0.12199,0.12191,0.3196,0.19942,0.22185,0.19592,0.17214,0.20739,0.18622,0.19792,0.19609,0.20102,0.20755,0.19868,0.19856,0.19084,0.22112,0.19318,0.20287,0.19741,0.20547,0.12371,0.12047,0.12267,0.12121,0.11657,0.11437,0.11822,0.12245,0.12691,0.12643,0.12161,0.12333,0.11949,0.13115,0.14809,0.11984,0.10679,0.040591,0.1923,0.19018,0.19629,0.18511,0.18849,0.16899,0.19094,0.24344,0.19084,0.26292,0.21884,0.17192,0.17761,0.20014,0.20823,0.19302,0.1952,0.18753,0.20218,0.12025,0.1234,0.12444,0.12232,0.11986,0.095838,0.12195,0.11249,0.12761,0.11973,0.13321,0.11907,0.12064,0.12715,0.12282,0.12053,0.1213,0.04101,0.22654,0.19772,0.20433,0.22157,0.1989,0.18348,0.18152,0.16258,0.15018,0.21333,0.19749,0.2

2854,0.16862,0.1925,0.19348,0.20422,0.20954,0.23222,0.11918,0.1205,0.1  
2282,0.12508,0.12289,0.10499,0.14301,0.12494,0.12754,0.12296,0.12814,0  
.12283,0.12244,0.12238,0.11454,0.12251,0.11832,0.11979,0.039476,0.2103  
7,0.25318,0.19664,0.21038,0.20152,0.19838,0.17974,0.20811,0.18713,0.20  
093,0.19549,0.19314,0.19397,0.21511,0.21027,0.19575,0.19348,0.19941,0.  
13482,0.1229,0.12197,0.12282,0.12245,0.14705,0.1169,0.12088,0.11885,0.  
12375,0.12203,0.11994,0.10876,0.11565,0.11374,0.12287,0.13437,0.038956  
,0.039365,0.039767,0.19427,0.19407,0.20144,0.19254,0.22048,0.19405,0.1  
8163,0.19585,0.20207,0.18667,0.18258,0.19654,0.18371,0.19422,0.21233,0  
.10161,0.12609,0.13053,0.12239,0.12321,0.12309,0.11471,0.12767,0.10913  
,0.12862,0.12233,0.11058,0.11922,0.11945,0.11366,0.11428,0.12183,0.119  
82,0.040242,0.039737,0.040574,0.042851,0.14491,0.20816,0.1813,0.15398,  
0.20493,0.19588,0.22455,0.22263,0.21369,0.20593,0.19354,0.20661,0.1397  
1,0.11643,0.10394,0.11272,0.13669,0.1362,0.14168,0.1117,0.12723,0.1242  
9,0.13539,0.13252,0.12338,0.13805,0.12032,0.1239,0.12661,0.13073,0.108  
55,0.12296,0.039678,0.041917,0.03949,0.039755,0.0409,0.038449,0.20618,  
0.19703,0.24588,0.20989,0.18406,0.19601,0.17267,0.19746,0.11242,0.1033  
2,0.092781,0.12261,0.12119,0.1211,0.12076,0.1266,0.092864,0.12378,0.13  
157,0.1608,0.12055,0.12002,0.14942,0.1262,0.12265,0.095777,0.12386,0.1  
1744,0.11836,0.11418,0.12715,0.040185,0.042445,0.039045,0.041164,0.040  
101,0.041361,0.21793,0.20562,0.2273,0.18689,0.20217,0.040006,0.040381,  
0.12399,0.1212,0.12274,0.12192,0.12259,0.12283,0.12064,0.13189,0.12223  
,0.11283,0.11873,0.11735,0.12708,0.12249,0.11409,0.12233,0.12395,0.117  
78,0.12531,0.12708,0.12653,0.039755,0.039543,0.038952,0.040481,0.04190  
8,0.041467,0.038942,0.040188,0.039389,0.038559,0.18587,0.18446,0.03737  
7,0.0382,0.039826,0.040307,0.13263,0.096755,0.12303,0.1257,0.12629,0.1  
342,0.12405,0.11793,0.1239,0.11609,0.11323,0.13919,0.13113,0.11967,0.1  
2678,0.12195,0.11295,0.13309,0.12949,0.039965,0.039998,0.041502,0.0395  
13,0.040036,0.041262,0.03955,0.04024,0.040292,0.03964,0.041606,0.04165  
,0.039971,0.039428,0.042141,0.038935,0.038186,0.1184,0.12931,0.11089,0  
.1022,0.1206,0.11578,0.12539,0.10889,0.11685,0.12276,0.11905,0.12649,0  
.11272,0.12245,0.12907,0.12214,0.039052,0.039325,0.041705,0.04175,0.03  
9319,0.04157,0.03944,0.040857,0.041566,0.039454,0.04216,0.040595,0.039  
717,0.039239,0.041026,0.039549,0.04118,0.03963,0.040137,0.11247,0.1147  
6,0.14426,0.12338,0.1112,0.12396,0.12368,0.12942,0.11541,0.12722,0.126  
83,0.13088,0.10877,0.039569,0.041487,0.04096,0.041123,0.040314,0.03945  
4,0.039865,0.040252,0.040441,0.039536,0.03978,0.041468,0.039445,0.0396  
96,0.037374,0.040069,0.041319,0.039726,0.038993,0.040627,0.040475,0.11  
56,0.12409,0.13005,0.12374,0.13194,0.10921,0.11592,0.12141,0.12118,0.0  
39837,0.039841,0.040373,0.03927,0.040514,0.03882,0.039536,0.039314,0.0  
40303,0.041976,0.039519,0.037615,0.042919,0.040178,0.040664,0.040081,0  
.039992,0.037544,0.04027,0.039454,0.041237,0.040258,0.04211,0.040502,0  
.041904,0.11434,0.13415,0.12302,0.10443,0.037655,0.037764,0.038529,0.0  
40648,0.038174,0.038589,0.040632,0.040174,0.040776,0.041175,0.041364,0  
.040331,0.03896,0.040381,0.040029,0.040187,0.041427,0.040214,0.039264,  
0.040196,0.040979,0.039695,0.0394,0.039191,0.041267,0.038746,0.040607,  
0.040347,0.039578,0.041864,0.042188,0.039786,0.041025,0.039873,0.03832  
2,0.039252,0.039818,0.039509,0.041014,0.04216,0.040637,0.040767,0.0405  
93,0.038494,0.039387,0.041466,0.04249,0.037852,0.041315,0.040695,0.037  
846,0.040908,0.038061,0.039761,0.041811,0.039758,0.040498,0.040097,0.0  
4099,0.039497,0.040623,0.040054,0.04008,0.039387,0.039944,0.040201,0.0  
41386,0.040305,0.040669,0.039923,0.040642,0.043681,0.039689,0.040917,0



|         |         |         |         |         |         |
|---------|---------|---------|---------|---------|---------|
| 0       | 0       | 0       | 0       | 0       | 0       |
| 0       | 0       | 0       | 0       | 0       | 0       |
| 0       | 0       | 0       | 0       | 0       | 0       |
| 0       | 0       | 0       | 0       | 0       | 0       |
| 0       | 0       | 0       | 0       | 0       | 0       |
| 0       | 0       | 0       | 0       | 0       | 0       |
| 0       | 0       | 0       | 0       | 0       | 0       |
| 0       | 0       | 0       | 0       | 0       | 0       |
| 0       | 0       | 0       | 0       | 0       | 0       |
| 0       | 0       | 0       | 0.5     | 0.42948 | 0.47589 |
| 0       | 0       | 0       | 0       | 0       | 0       |
| 0       | 0       | 0       | 0       | 0       | 0       |
| 0       | 0       | 0       | 0       | 0       | 0       |
| 0       | 0       | 0       | 0       | 0       | 0       |
| 0.50893 | 0.57408 | 0.56937 | 0.5     | 0.54437 | 0.56822 |
| 0       | 0       | 0       | 0       | 0       | 0       |
| 0       | 0       | 0       | 0       | 0       | 0       |
| 0       | 0       | 0       | 0       | 0       | 0       |
| 0       | 0       | 0       | 0       | 0       | 0       |
| 0       | 0       | 0       | 0       | 0       | 0       |
| 0.44634 | 0.50375 | 0.45543 | 0.48206 | 0.49612 | 0.63481 |
| 0.5     | 0       | 0       | 0       | 0       | 0       |
| 0       | 0       | 0       | 0       | 0       | 0       |
| 0       | 0       | 0       | 0       | 0       | 0       |
| 0       | 0       | 0       | 0       | 0       | 0       |
| 0       | 0       | 0       | 0.46439 | 0.56132 |         |
| 0.44634 | 0.50375 | 0.45543 | 0.48206 | 0.49612 | 0.63481 |
| 0.5     | 0       | 0       | 0       | 0       | 0       |
| 0       | 0       | 0       | 0       | 0       | 0       |
| 0       | 0       | 0       | 0       | 0       | 0       |
| 0       | 0       | 0       | 0.4967  | 0.50346 | 0.51369 |
| 0.5     | 0.47364 | 0.5     | 0.4923  | 0.40215 | 0.50108 |
| 0.5     | 0.54287 | 0.51665 | 0       | 0       | 0       |
| 0       | 0       | 0       | 0       | 0       | 0       |
| 0       | 0       | 0       | 0       | 0       | 0       |
| 0       | 0       | 0       | 0       | 0       | 0       |
| 0       | 0.52637 | 0.42059 | 0.5     | 0.36333 | 0.5     |
| 0.4806  | 0.39421 | 0.70845 | 0.5     | 0.5     | 0.44952 |
| 0.5267  | 0.58888 | 0.45405 | 0.5     | 0       | 0       |
| 0       | 0       | 0       | 0       | 0       | 0       |
| 0       | 0       | 0       | 0       | 0       | 0       |
| 0       | 0       | 0       | 0       | 0       | 0       |
| 0.5     | 0.41024 | 0.41458 | 0.49602 | 0.5     | 0.51901 |
| 0.53488 | 0.5     | 0.28932 | 0.49837 | 0.54152 | 0.52118 |
| 0.49335 | 0.49797 | 0.5     | 0.45678 | 0.35821 | 0.45026 |
| 0       | 0       | 0       | 0       | 0       | 0       |
| 0       | 0       | 0       | 0       | 0       | 0.33816 |
| 0.33333 | 0.33032 | 0.36411 | 0.30647 | 0.3604  | 0.33333 |
| 0.30854 | 0.30406 | 0.58516 | 0.51386 | 0.5     | 0.51275 |
| 0.5     | 0.67466 | 0.5146  | 0.47486 | 0.55755 | 0.50427 |
| 0.42436 | 0.56689 | 0.48447 | 0.50312 | 0.49317 | 0.55896 |
| 0.53459 | 0.53887 | 0       | 0       | 0       | 0       |
| 0       | 0       | 0       | 0       | 0       | 0.50883 |
| 0.33333 | 0.22966 | 0.33766 | 0.33333 | 0.32337 | 0.33333 |
| 0.37886 | 0.34025 | 0.27578 | 0.29143 | 0.5     | 0.65593 |
| 0.49317 | 0.5     | 0.47684 | 0.5     | 0.61135 | 0.50619 |
| 0.45504 | 0.50792 | 0.58653 | 0.50166 | 0.43765 | 0.48616 |

|         |         |         |         |         |         |
|---------|---------|---------|---------|---------|---------|
| 0.45617 | 0.44038 | 0.52251 | 0.42041 | 0       | 0       |
| 0       | 0       | 0       | 0       | 0       | 0.48991 |
| 0.41992 | 0.43988 | 0.36074 | 0.25769 | 0.33333 | 0.29158 |
| 0.27887 | 0.33487 | 0.32928 | 0.27594 | 0.3151  | 0.29991 |
| 0.5     | 0.38696 | 0.5     | 0.56591 | 0.64994 | 0.61097 |
| 0.5863  | 0.5     | 0.5     | 0.5     | 0.49126 | 0.5     |
| 0.49479 | 0.49939 | 0.5     | 0.52983 | 0.68846 | 0.45611 |
| 0       | 0       | 0       | 0       | 0       | 0       |
| 0.44654 | 0.47469 | 0.52232 | 0.62194 | 0.54682 | 0.33513 |
| 0.40367 | 0.27559 | 0.38141 | 0.36679 | 0.35923 | 0.3962  |
| 0.29812 | 0.30816 | 0.49388 | 0.52456 | 0.5     | 0.52923 |
| 0.58974 | 0.46036 | 0.5308  | 0.65638 | 0.4821  | 0.53082 |
| 0.44777 | 0.59991 | 0.54212 | 0.48175 | 0.53405 | 0.50091 |
| 0.53088 | 0.6105  | 0       | 0       | 0       | 0       |
| 0       | 0.53253 | 0.49648 | 0.5     | 0.52639 | 0.53215 |
| 0.5     | 0.39598 | 0.36792 | 0.231   | 0.38238 | 0.37418 |
| 0.33333 | 0.33333 | 0.33333 | 0.33333 | 0.50924 | 0.54465 |
| 0.45978 | 0.5     | 0.5     | 0.47912 | 0.39255 | 0.48636 |
| 0.54043 | 0.5     | 0.51297 | 0.55295 | 0.5     | 0.52037 |
| 0.51258 | 0.5     | 0.43606 | 0.46274 | 0       | 0       |
| 0       | 0.5     | 0.50435 | 0.49315 | 0.50115 | 0.48662 |
| 0.5     | 0.4836  | 0.59566 | 0.33333 | 0.34484 | 0.33703 |
| 0.49279 | 0.36836 | 0.3191  | 0.33333 | 0.38827 | 0.33333 |
| 0.28064 | 0.47816 | 0.49875 | 0.5     | 0.5     | 0.5     |
| 0.53636 | 0.4976  | 0.40315 | 0.51506 | 0.47097 | 0.57398 |
| 0.5     | 0.57569 | 0.69115 | 0.48011 | 0.45986 | 0.50646 |
| 0       | 0.47599 | 0.47518 | 0.52554 | 0.5     | 0.4303  |
| 0.50062 | 0.39966 | 0.5     | 0.51905 | 0.41504 | 0.33333 |
| 0.29697 | 0.34894 | 0.3542  | 0.33333 | 0.37883 | 0.37949 |
| 0.34571 | 0.46766 | 0.50837 | 0.5342  | 0.5719  | 0.5036  |
| 0.5     | 0.52167 | 0.56705 | 0.50675 | 0.47253 | 0.50482 |
| 0.5     | 0.5     | 0.55927 | 0.60388 | 0.47862 | 0.49358 |
| 1       | 0.56256 | 0.5     | 0.54112 | 0.68511 | 0.45469 |
| 0.68527 | 0.58665 | 0.47266 | 0.4605  | 0.5     | 0.33333 |
| 0.22474 | 0.34502 | 0.39564 | 0.35722 | 0.20926 | 0.33955 |
| 0.31024 | 0.33948 | 0.46622 | 0.48846 | 0.49033 | 0.46577 |
| 0.48505 | 0.40128 | 0.48578 | 0.59445 | 0.5     | 0.62579 |
| 0.5     | 0.5     | 0.44728 | 0.53158 | 0.5     | 0.47672 |
| 0.5     | 1       | 0.44037 | 0.40578 | 0.4923  | 0.5     |
| 0.62162 | 0.5     | 0.5     | 0.48783 | 0.5     | 0.48531 |
| 0.24649 | 0.36635 | 0.32687 | 0.34406 | 0.33333 | 0.31349 |
| 0.33807 | 0.34969 | 0.5     | 0.54578 | 0.55432 | 0.40152 |
| 0.48514 | 0.40657 | 0.4998  | 0.45037 | 0.49339 | 0.5011  |
| 0.5428  | 0.5     | 0.48452 | 0.5914  | 0.5     | 0.50684 |
| 0.54446 | 0.53368 | 1       | 0.45298 | 0.49175 | 0.68035 |
| 0.55204 | 0.46149 | 0.5145  | 0.5     | 0.49082 | 0.49486 |
| 0.5     | 0.36962 | 0.41833 | 0.33739 | 0.33123 | 0.29173 |
| 0.36771 | 0.35539 | 0.28468 | 0.55152 | 0.5     | 0.33017 |
| 0.50322 | 0.43859 | 0.5     | 0.48883 | 0.50533 | 0.57043 |
| 0.43734 | 0.5     | 0.55439 | 0.47226 | 0.51319 | 0.5     |
| 0.49487 | 0.34592 | 1       | 1       | 1       | 0.29306 |
| 0.53356 | 0.5     | 0.5     | 0.39678 | 0.46648 | 0.5     |

|         |         |         |         |         |         |   |
|---------|---------|---------|---------|---------|---------|---|
| 0.5     | 0.5859  | 0.33333 | 0.37576 | 0.36445 | 0.26749 |   |
| 0.32324 | 0.33302 | 0.55358 | 0.5     | 0.5     | 0.39672 |   |
| 0.66508 | 0.58341 | 0.44134 | 0.46887 | 0.6049  | 0.5183  |   |
| 0.48837 | 0.48022 | 0.57197 | 0.42116 | 0.84552 | 0.58125 |   |
| 0.40797 | 0.47638 | 1       | 1       | 1       | 1       |   |
| 0.5     | 0.43146 | 0.40579 | 0.53264 | 0.5     | 0.60062 |   |
| 0.53724 | 0.5488  | 0.5     | 0.40505 | 0.33233 | 0.36897 |   |
| 0.55989 | 0.5     | 0.17878 | 0.53281 | 0.55079 | 0.51616 |   |
| 0.52447 | 0.5     | 0.3883  | 0.48858 | 0.5     | 0.42339 |   |
| 0.53726 | 0.5     | 0.2491  | 0.46429 | 0.49975 | 0.46733 |   |
| 0.5     | 0.46659 | 1       | 1       | 1       | 1       |   |
| 1       | 1       | 0.43311 | 0.41273 | 0.49576 | 0.5     |   |
| 0.2845  | 0.58527 | 0.48233 | 0.5     | 0.37921 | 0.4856  |   |
| 0.42865 | 0.47795 | 0.48621 | 0.47362 | 0.36488 | 0.5     |   |
| 0.51487 | 0.47686 | 0.5     | 0.43052 | 0.49028 | 0.52918 |   |
| 0.57505 | 0.54034 | 0.56387 | 0.5     | 0.5     | 0.54566 |   |
| 0.5     | 0.5     | 0.56163 | 1       | 1       | 1       |   |
| 1       | 1       | 1       | 0.48773 | 0.5     | 0.43754 |   |
| 0.47181 | 0.47187 | 1       | 1       | 0.51844 | 0.48257 |   |
| 0.59348 | 0.5     | 0.5     | 0.5     | 0.5     | 0.50357 |   |
| 0.5     | 0.46689 | 0.5     | 0.47933 | 0.5     | 0.29551 |   |
| 0.34368 | 0.53185 | 0.47263 | 0.5     | 0.47393 | 0.5     |   |
| 0.5     | 1       | 1       | 1       | 1       | 1       |   |
| 1       | 1       | 1       | 1       | 1       | 0.51812 |   |
| 0.44656 | 1       | 1       | 1       | 1       | 0.4636  |   |
| 0.61496 | 0.45225 | 0.53577 | 0.53863 | 0.41003 | 0.5     |   |
| 0.5     | 0.5     | 0.5     | 0.50893 | 0.44322 | 0.5     |   |
| 0.5     | 0.44441 | 0.48334 | 0.50681 | 0.4752  | 0.55039 |   |
| 1       | 1       | 1       | 1       | 1       | 1       |   |
| 1       | 1       | 1       | 1       | 1       | 1       |   |
| 1       | 1       | 1       | 1       | 1       | 0.49539 |   |
| 0.5     | 0.5012  | 0.57671 | 0.46642 | 0.57995 | 0.53386 |   |
| 0.5     | 0.49254 | 0.42423 | 0.48485 | 0.5015  | 0.43297 |   |
| 0.45164 | 0.46959 | 0.51973 | 1       | 1       | 1       | 1 |
| 1       | 1       | 1       | 1       | 1       | 1       |   |
| 1       | 1       | 1       | 1       | 1       | 1       |   |
| 1       | 1       | 1       | 1       | 0.5858  | 0.49489 |   |
| 0.38925 | 0.49756 | 0.57401 | 0.5     | 0.46803 | 0.48146 |   |
| 0.5     | 0.49343 | 0.45415 | 0.50071 | 0.35089 | 1       |   |
| 1       | 1       | 1       | 1       | 1       | 1       |   |
| 1       | 1       | 1       | 1       | 1       | 1       |   |
| 1       | 1       | 1       | 1       | 1       | 1       |   |
| 1       | 1       | 0.5     | 0.59043 | 0.51695 | 0.51554 |   |
| 0.51211 | 0.69906 | 0.5     | 0.5     | 0.51134 | 1       |   |
| 1       | 1       | 1       | 1       | 1       | 1       |   |
| 1       | 1       | 1       | 1       | 1       | 1       |   |
| 1       | 1       | 1       | 1       | 1       | 1       |   |
| 1       | 1       | 1       | 1       | 1       | 1       |   |
| 0.59734 | 0.48259 | 0.44464 | 0.64073 | 1       | 1       | 1 |
| 1       | 1       | 1       | 1       | 1       | 1       |   |
| 1       | 1       | 1       | 1       | 1       | 1       |   |
| 1       | 1       | 1       | 1       | 1       | 1       |   |





|         |         |         |         |         |         |     |
|---------|---------|---------|---------|---------|---------|-----|
| 1       | 1       | 1       | 1       | 1       | 1       | 1   |
| 1       | 1       | 1       | 1       | 1       | 1       | 1   |
| 0       | 0       | 0       | 0       | 0       | 0       | 0   |
| 0.5     | 0.37727 | 0.5     | 0.5     | 0.50117 | 0.46685 |     |
| 0.49124 | 0.5     | 0.5     | 0.4927  | 1       | 1       | 1   |
| 1       | 1       | 1       | 1       | 1       | 1       |     |
| 1       | 1       | 1       | 1       | 1       | 1       |     |
| 1       | 1       | 1       | 0       | 0       | 0       |     |
| 0       | 0       | 0       | 0.46587 | 0.5     | 0.42892 |     |
| 0.51268 | 0.48168 | 0.40297 | 0.5     | 0.5     | 0.5     | 0.5 |
| 0.52445 | 0.46583 | 1       | 1       | 1       | 1       | 1   |
| 1       | 1       | 1       | 1       | 1       | 1       |     |
| 1       | 1       | 1       | 0.5     | 0.57052 | 0.52411 |     |
| 1       | 0       | 0       | 0       | 0       | 0       |     |
| 0       | 0       | 0.48546 | 0.44021 | 0.5     | 0.5     |     |
| 0.45615 | 0.52676 | 0.61455 | 0.5     | 0.49639 | 0.51694 |     |
| 0.5     | 1       | 1       | 1       | 1       | 1       |     |
| 1       | 1       | 1       | 1       | 1       | 1       |     |
| 0.49107 | 0.42592 | 0.43063 | 0.5     | 0.45563 | 0.43178 |     |
| 1       | 0       | 0       | 0       | 0       | 0       |     |
| 0       | 0       | 0.55542 | 0.5     | 0.5     | 0.48744 |     |
| 0.53957 | 0.44117 | 0.5     | 0.41995 | 0.5     | 0.50021 |     |
| 0.39389 | 1       | 1       | 1       | 1       | 1       | 1   |
| 1       | 1       | 1       | 1       | 0.53561 | 0.43868 |     |
| 0.55366 | 0.49625 | 0.54457 | 0.51794 | 0.50388 | 0.36519 |     |
| 0.5     | 1       | 0       | 0       | 0       | 0       |     |
| 0       | 0       | 0       | 0.46194 | 0.45163 | 0.46575 |     |
| 0.5     | 0.56155 | 0.5     | 0.48928 | 0.54939 | 0.5     |     |
| 0.40228 | 0.51784 | 0.5     | 1       | 1       | 1       | 1   |
| 1       | 1       | 1       | 0.5033  | 0.49654 | 0.48631 |     |
| 0.5     | 0.52636 | 0.5     | 0.5077  | 0.59785 | 0.49892 |     |
| 0.5     | 0.45713 | 0.48335 | 0       | 0       | 0       |     |
| 0       | 0       | 0       | 0       | 0.50917 | 0.52604 |     |
| 0.4529  | 0.5     | 0.5     | 0.47842 | 0.53235 | 0.43198 |     |
| 0.45641 | 0.4759  | 0.51822 | 0.54398 | 1       | 1       | 1   |
| 1       | 0.47363 | 0.57941 | 0.5     | 0.63667 | 0.5     |     |
| 0.5194  | 0.60579 | 0.29155 | 0.5     | 0.5     | 0.55048 |     |
| 0.4733  | 0.41112 | 0.54595 | 0.5     | 0       | 0       | 0   |
| 0       | 0       | 0       | 0       | 0       | 0       |     |
| 0       | 0.5     | 0.53618 | 0.59769 | 0.49764 | 0.49186 |     |
| 0.65255 | 0.5     | 0.51506 | 0.51758 | 0.47199 | 0.49891 |     |
| 0.5     | 0.58976 | 0.58542 | 0.50398 | 0.5     | 0.48099 |     |
| 0.46512 | 0.5     | 0.71068 | 0.50163 | 0.45848 | 0.47882 |     |
| 0.50665 | 0.50203 | 0.5     | 0.54322 | 0.64179 | 0.54974 |     |
| 0       | 0       | 0       | 0       | 0       | 0       |     |
| 0       | 0       | 0       | 0.46758 | 0.46897 | 0.32368 |     |
| 0.33333 | 0.31158 | 0.27178 | 0.34677 | 0.2792  | 0.33333 |     |
| 0.34573 | 0.27462 | 0.41484 | 0.48614 | 0.5     | 0.48725 |     |
| 0.5     | 0.32534 | 0.4854  | 0.52514 | 0.44245 | 0.49573 |     |
| 0.57564 | 0.43311 | 0.51553 | 0.49688 | 0.50683 | 0.44104 |     |
| 0.46541 | 0.46113 | 0       | 0       | 0       | 0       | 0   |
| 0       | 0       | 0       | 0       | 0       | 0       |     |

|         |         |         |         |         |         |
|---------|---------|---------|---------|---------|---------|
| 0.33333 | 0.38517 | 0.33766 | 0.33333 | 0.33831 | 0.33333 |
| 0.37886 | 0.36768 | 0.36211 | 0.38585 | 0.5     | 0.34407 |
| 0.50683 | 0.5     | 0.52316 | 0.5     | 0.38865 | 0.49381 |
| 0.54496 | 0.49208 | 0.41347 | 0.49834 | 0.56235 | 0.51384 |
| 0.54383 | 0.55962 | 0.47749 | 0.57959 | 0       | 0       |
| 0       | 0       | 0       | 0       | 0       | 0       |
| 0       | 0       | 0.27851 | 0.38436 | 0.33333 | 0.33202 |
| 0.34232 | 0.36289 | 0.3296  | 0.36604 | 0.39338 | 0.35004 |
| 0.5     | 0.61304 | 0.5     | 0.43409 | 0.35006 | 0.38903 |
| 0.4137  | 0.5     | 0.5     | 0.5     | 0.50874 | 0.5     |
| 0.50521 | 0.50061 | 0.5     | 0.47017 | 0.31154 | 0.54389 |
| 0       | 0       | 0       | 0       | 0       | 0       |
| 0       | 0       | 0       | 0       | 0       | 0.33513 |
| 0.28515 | 0.3622  | 0.38141 | 0.3449  | 0.33835 | 0.14564 |
| 0.35094 | 0.2939  | 0.50612 | 0.47544 | 0.5     | 0.47077 |
| 0.41026 | 0.53964 | 0.4692  | 0.34362 | 0.5179  | 0.46918 |
| 0.55223 | 0.40009 | 0.45788 | 0.51825 | 0.46595 | 0.49909 |
| 0.46912 | 0.3895  | 0       | 0       | 0       | 0       |
| 0       | 0       | 0       | 0       | 0       | 0       |
| 0       | 0.34249 | 0.39452 | 0.42285 | 0.32544 | 0.25164 |
| 0.33333 | 0.33333 | 0.33333 | 0.33333 | 0.49076 | 0.45535 |
| 0.54022 | 0.5     | 0.5     | 0.52088 | 0.60745 | 0.51364 |
| 0.45957 | 0.5     | 0.48703 | 0.44705 | 0.5     | 0.47963 |
| 0.48742 | 0.5     | 0.56394 | 0.53726 | 0       | 0       |
| 0       | 0       | 0       | 0       | 0       | 0       |
| 0       | 0       | 0       | 0.33333 | 0.34484 | 0.32593 |
| 0.22155 | 0.36743 | 0.33708 | 0.33333 | 0.37892 | 0.33333 |
| 0.71936 | 0.52184 | 0.50125 | 0.5     | 0.5     | 0.5     |
| 0.46364 | 0.5024  | 0.59685 | 0.48494 | 0.52903 | 0.42602 |
| 0.5     | 0.42431 | 0.30885 | 0.51989 | 0.54014 | 0.49354 |
| 0       | 0       | 0       | 0       | 0       | 0       |
| 0       | 0       | 0       | 0       | 0.37046 | 0.33333 |
| 0.35152 | 0.33273 | 0.37505 | 0.33333 | 0.24235 | 0.30211 |
| 0.34571 | 0.53234 | 0.49163 | 0.4658  | 0.4281  | 0.4964  |
| 0.5     | 0.47833 | 0.43295 | 0.49325 | 0.52747 | 0.49518 |
| 0.5     | 0.5     | 0.44073 | 0.39612 | 0.52138 | 0.50642 |
| 0       | 0       | 0       | 0       | 0       | 0       |
| 0       | 0       | 0       | 0       | 0       | 0.33333 |
| 0.43734 | 0.22295 | 0.36552 | 0.32785 | 0.3612  | 0.33955 |
| 0.34071 | 0.37449 | 0.53378 | 0.51154 | 0.50967 | 0.53423 |
| 0.51495 | 0.59872 | 0.51422 | 0.40555 | 0.5     | 0.37421 |
| 0.5     | 0.5     | 0.55272 | 0.46842 | 0.5     | 0.52328 |
| 0.5     | 0       | 0       | 0       | 0       | 0       |
| 0       | 0       | 0       | 0       | 0       | 0       |
| 0.31057 | 0.30954 | 0.33523 | 0.3184  | 0.33333 | 0.30171 |
| 0.33807 | 0.34969 | 0.5     | 0.45422 | 0.44568 | 0.59848 |
| 0.51486 | 0.59343 | 0.5002  | 0.54963 | 0.50661 | 0.4989  |
| 0.4572  | 0.5     | 0.51548 | 0.4086  | 0.5     | 0.49316 |
| 0.45554 | 0.46632 | 0       | 0       | 0       | 0       |
| 0       | 0       | 0       | 0       | 0       | 0       |
| 0       | 0.28567 | 0.32168 | 0.33739 | 0.33439 | 0.38921 |
| 0.33726 | 0.35539 | 0.32714 | 0.44848 | 0.5     | 0.66983 |

|         |         |         |         |         |         |
|---------|---------|---------|---------|---------|---------|
| 0.49678 | 0.56141 | 0.5     | 0.51117 | 0.49467 | 0.42957 |
| 0.56266 | 0.5     | 0.44561 | 0.52774 | 0.48681 | 0.5     |
| 0.50513 | 0.65408 | 0       | 0       | 0       | 0       |
| 0       | 0       | 0       | 0       | 0       | 0       |
| 0       | 0       | 0.33333 | 0.37576 | 0.36445 | 0.38692 |
| 0.33838 | 0.3316  | 0.44642 | 0.5     | 0.5     | 0.60328 |
| 0.33492 | 0.41659 | 0.55866 | 0.53113 | 0.3951  | 0.4817  |
| 0.51163 | 0.51978 | 0.42803 | 0.57884 | 0.15448 | 0.41875 |
| 0.59203 | 0.52362 | 0       | 0       | 0       | 0       |
| 0       | 0       | 0       | 0       | 0       | 0       |
| 0       | 0       | 0       | 0.40505 | 0.33384 | 0.36408 |
| 0.44011 | 0.5     | 0.82122 | 0.46719 | 0.44921 | 0.48384 |
| 0.47553 | 0.5     | 0.6117  | 0.51142 | 0.5     | 0.57661 |
| 0.46274 | 0.5     | 0.7509  | 0.53571 | 0.50025 | 0.53267 |
| 0.5     | 0.53341 | 0       | 0       | 0       | 0       |
| 0       | 0       | 0       | 0       | 0       | 0       |
| 0       | 0       | 0       | 0       | 0.62079 | 0.5144  |
| 0.57135 | 0.52205 | 0.51379 | 0.52638 | 0.63512 | 0.5     |
| 0.48513 | 0.52314 | 0.5     | 0.56948 | 0.50972 | 0.47082 |
| 0.42495 | 0.45966 | 0.43613 | 0.5     | 0.5     | 0.45434 |
| 0.5     | 0.5     | 0.43837 | 0       | 0       | 0       |
| 0       | 0       | 0       | 0       | 0       | 0       |
| 0       | 0       | 0       | 0       | 0.48156 | 0.51743 |
| 0.40652 | 0.5     | 0.5     | 0.5     | 0.5     | 0.49643 |
| 0.5     | 0.53311 | 0.5     | 0.52067 | 0.5     | 0.70449 |
| 0.65632 | 0.46815 | 0.52737 | 0.5     | 0.52607 | 0.5     |
| 0.5     | 0       | 0       | 0       | 0       | 0       |
| 0       | 0       | 0       | 0       | 0       | 0       |
| 0       | 0       | 0       | 0       | 0       | 0.5364  |
| 0.38504 | 0.54775 | 0.46423 | 0.46137 | 0.58997 | 0.5     |
| 0.5     | 0.5     | 0.5     | 0.49107 | 0.55678 | 0.5     |
| 0.5     | 0.55559 | 0.51666 | 0.49319 | 0.5248  | 0.44961 |
| 0       | 0       | 0       | 0       | 0       | 0       |
| 0       | 0       | 0       | 0       | 0       | 0       |
| 0       | 0       | 0       | 0       | 0       | 0.50461 |
| 0.5     | 0.4988  | 0.42329 | 0.53358 | 0.42005 | 0.46614 |
| 0.5     | 0.50746 | 0.57577 | 0.51515 | 0.4985  | 0.56703 |
| 0.54836 | 0.53041 | 0.48027 | 0       | 0       | 0       |
| 0       | 0       | 0       | 0       | 0       | 0       |
| 0       | 0       | 0       | 0       | 0       | 0       |
| 0       | 0       | 0       | 0       | 0.4142  | 0.50511 |
| 0.61075 | 0.50244 | 0.42599 | 0.5     | 0.53197 | 0.51854 |
| 0.5     | 0.50657 | 0.54585 | 0.49929 | 0.64911 | 0       |
| 0       | 0       | 0       | 0       | 0       | 0       |
| 0       | 0       | 0       | 0       | 0       | 0       |
| 0       | 0       | 0       | 0       | 0       | 0       |
| 0       | 0       | 0.5     | 0.40957 | 0.48305 | 0.48446 |
| 0.48789 | 0.30094 | 0.5     | 0.5     | 0.48866 | 0       |
| 0       | 0       | 0       | 0       | 0       | 0       |
| 0       | 0       | 0       | 0       | 0       | 0       |
| 0       | 0       | 0       | 0       | 0       | 0       |
| 0       | 0       | 0       | 0       | 0       | 0       |



|         |         |         |         |         |         |         |
|---------|---------|---------|---------|---------|---------|---------|
| 0       | 0       | 0       | 0       | 0       | 0       | 0       |
| 1       | 1       | 1       | 1       | 0.42399 | 0.54072 |         |
| 0.50283 | 0.52804 | 0.49295 |         | 0.5     | 0.52466 | 0.5     |
| 0.5     | 0.5     | 0       | 0       | 0       | 0       | 0       |
| 0       | 0       | 0       | 0       | 0       | 0       | 0       |
| 0       | 0       | 0       | 0       | 0       | 0       | 0       |
| 1       | 1       | 1       | 1       | 1       | 1       | 1       |
| 0.5     | 0.62273 | 0.5     | 0.5     | 0.49883 | 0.53315 |         |
| 0.50876 |         | 0.5     | 0.5     | 0.5073  | 0       | 0       |
| 0       | 0       | 0       | 0       | 0       | 0       | 0       |
| 0       | 0       | 0       | 0       | 0       | 0       | 0       |
| 0       | 0       | 0       | 0       | 1       | 1       | 1       |
| 1       | 1       | 1       | 0.53413 | 0.5     | 0.57108 |         |
| 0.48732 | 0.51832 | 0.59703 |         | 0.5     | 0.5     | 0.5     |
| 0.47555 | 0.53417 | 0       | 0       | 0       | 0       | 0       |
| 0       | 0       | 0       | 0       | 0       | 0       | 0       |
| 0       | 0       | 0       | 0       | 0       | 0       | 0       |
| 0       | 1       | 1       | 1       | 1       | 1       | 1       |
| 1       | 1       | 0.51454 | 0.55979 | 0.5     | 0.5     |         |
| 0.54385 | 0.47324 | 0.38545 |         | 0.5     | 0.50361 | 0.48306 |
| 0.5     | 0       | 0       | 0       | 0       | 0       | 0       |
| 0       | 0       | 0       | 0       | 0       | 0       | 0       |
| 0       | 0       | 0       | 0       | 0       | 0       | 0       |
| 0       | 1       | 1       | 1       | 1       | 1       | 1       |
| 1       | 1       | 0.44458 | 0.5     | 0.5     | 0.51256 |         |
| 0.46043 | 0.55883 |         | 0.5     | 0.58005 | 0.5     | 0.49979 |
| 0.60611 | 0       | 0       | 0       | 0       | 0       | 0       |
| 0       | 0       | 0       | 0       | 0       | 0       | 0       |
| 0       | 0       | 0       | 0       | 0       | 0       | 0       |
| 0       | 0       | 1       | 1       | 1       | 1       | 1       |
| 1       | 1       | 1       | 0.53806 | 0.54837 | 0.53425 |         |
| 0.5     | 0.43845 | 0.5     | 0.51072 | 0.45061 | 0.5     |         |
| 0.59772 | 0.48216 |         | 0.5     | 0       | 0       | 0       |
| 0       | 0       | 0       | 0       | 0       | 0       | 0       |
| 0       | 0       | 0       | 0       | 0       | 0       | 0       |
| 0       | 0       | 0       | 0       | 1       | 1       | 1       |
| 1       | 1       | 1       | 1       | 0.49083 | 0.47396 |         |
| 0.5471  | 0.5     | 0.5     | 0.52158 | 0.46765 | 0.56802 |         |
| 0.54359 | 0.5241  | 0.48178 | 0.45602 | 0       | 0       | 0       |
| 0       | 0       | 0       | 0       | 0       | 0       | 0       |
| 0       | 0       | 0       | 0       | 0       | 0       | 0       |
| 0       | 0       | 0       | 0       | 1       | 1       | 1       |
| 1       | 1       | 1       | 1       | 1       | 1       | 1       |
| 1       | 0.5     | 0.46382 | 0.40231 | 0.50236 | 0.50814 |         |
| 0.34745 |         | 0.5     | 0.48494 | 0.48242 | 0.52801 | 0.50109 |
| 0       | 0       | 0       | 0       | 0       | 0       | 0       |
| 0       | 0       | 0       | 0       | 0       | 0       | 0       |
| 0       | 0       | 0       | 0       | 0       | 0       | 0       |
| 1       | 1       | 1       | 1       | 1       | 1       | 1       |
| 1       | 1       | 1       | 0.53242 | 0.53103 | 0.33816 |         |
| 0.33333 | 0.3581  | 0.36411 | 0.34677 | 0.3604  | 0.33333 |         |
| 0.34573 | 0.42132 | 0       | 0       | 0       | 0       | 0       |

|         |         |         |         |         |         |
|---------|---------|---------|---------|---------|---------|
| 0       | 0       | 0       | 0       | 0       | 0       |
| 0       | 0       | 0       | 0       | 0       | 0       |
| 0       | 0       | 1       | 1       | 1       | 1       |
| 1       | 1       | 1       | 1       | 1       | 0.49117 |
| 0.33333 | 0.38517 | 0.32467 | 0.33333 | 0.33831 | 0.33333 |
| 0.24228 | 0.29207 | 0.36211 | 0.32272 | 0       | 0       |
| 0       | 0       | 0       | 0       | 0       | 0       |
| 0       | 0       | 0       | 0       | 0       | 0       |
| 0       | 0       | 0       | 0       | 1       | 1       |
| 1       | 1       | 1       | 1       | 1       | 0.51009 |
| 0.58008 | 0.56012 | 0.36074 | 0.35796 | 0.33333 | 0.3764  |
| 0.3788  | 0.30224 | 0.34112 | 0.35802 | 0.29152 | 0.35004 |
| 0       | 0       | 0       | 0       | 0       | 0       |
| 0       | 0       | 0       | 0       | 0       | 0       |
| 0       | 0       | 0       | 0       | 0       | 0       |
| 1       | 1       | 1       | 1       | 1       | 1       |
| 0.55346 | 0.52531 | 0.47768 | 0.37806 | 0.45318 | 0.32975 |
| 0.31118 | 0.3622  | 0.23719 | 0.2883  | 0.30241 | 0.45817 |
| 0.35094 | 0.39794 | 0       | 0       | 0       | 0       |
| 0       | 0       | 0       | 0       | 0       | 0       |
| 0       | 0       | 0       | 0       | 0       | 0       |
| 0       | 0       | 1       | 1       | 1       | 1       |
| 1       | 0.46747 | 0.50352 | 0.5     | 0.47361 | 0.46785 |
| 0.5     | 0.26153 | 0.23756 | 0.34615 | 0.29218 | 0.37418 |
| 0.33333 | 0.33333 | 0.33333 | 0.33333 | 0       | 0       |
| 0       | 0       | 0       | 0       | 0       | 0       |
| 0       | 0       | 0       | 0       | 0       | 0       |
| 0       | 0       | 0       | 0       | 1       | 1       |
| 1       | 0.5     | 0.49565 | 0.50685 | 0.49885 | 0.51338 |
| 0.5     | 0.5164  | 0.40434 | 0.33333 | 0.31031 | 0.33703 |
| 0.28566 | 0.2642  | 0.34383 | 0.33333 | 0.23281 | 0.33333 |
| 0       | 0       | 0       | 0       | 0       | 0       |
| 0       | 0       | 0       | 0       | 0       | 0       |
| 0       | 0       | 0       | 0       | 0       | 0       |
| 1       | 0.52401 | 0.52482 | 0.47446 | 0.5     | 0.5697  |
| 0.49938 | 0.60034 | 0.5     | 0.48095 | 0.21451 | 0.33333 |
| 0.35152 | 0.31834 | 0.27075 | 0.33333 | 0.37883 | 0.3184  |
| 0.30858 | 0       | 0       | 0       | 0       | 0       |
| 0       | 0       | 0       | 0       | 0       | 0       |
| 0       | 0       | 0       | 0       | 0       | 0       |
| 0       | 0.43744 | 0.5     | 0.45888 | 0.31489 | 0.54531 |
| 0.31473 | 0.41335 | 0.52734 | 0.5395  | 0.5     | 0.33333 |
| 0.33792 | 0.43203 | 0.23884 | 0.31493 | 0.42954 | 0.3209  |
| 0.34905 | 0.28603 | 0       | 0       | 0       | 0       |
| 0       | 0       | 0       | 0       | 0       | 0       |
| 0       | 0       | 0       | 0       | 0       | 0       |
| 0       | 0       | 0.55963 | 0.59422 | 0.5077  | 0.5     |
| 0.37838 | 0.5     | 0.5     | 0.51217 | 0.5     | 0.51469 |
| 0.44295 | 0.32411 | 0.33791 | 0.33754 | 0.33333 | 0.3848  |
| 0.32387 | 0.30061 | 0       | 0       | 0       | 0       |
| 0       | 0       | 0       | 0       | 0       | 0       |
| 0       | 0       | 0       | 0       | 0       | 0       |







0.043898  
0.042582  
0.041662  
0.040998  
0.040498  
0.040102

gtTCs=

0  
0.07155  
0.116  
0.14393  
0.16177  
0.17342  
0.18126  
0.18671  
0.19067  
0.19366  
0.19601  
0.19792  
0.19952  
0.20088  
0.20206  
0.20309  
0.20398  
0.20476

gtTCp=

0  
2.385  
1.5979  
1.1196  
0.8287  
0.65143  
0.54309  
0.47655  
0.43538  
0.4096  
0.39316  
0.38239  
0.37506  
0.36982  
0.36585  
0.36266  
0.35995  
0.35753

X\_mask=

2.2204e-016,2.2204e-016,2.2204e-016,5.1623e-005,2.2204e-016,2.2204e-016,0.00027668,0.00075049,0.00068662,0.00035063,0.00094933,2.2204e-016,0.00016621,0.00012421,0.00021209,2.2204e-016,0.00021865,0.00039997,0.00030607,2.2204e-016,2.2204e-016,2.2204e-

016,0.0064036,2.2204e-016,2.2204e-  
016,0.00032067,0.0011019,0.00040821,0.00010781,0.00023074,0.00013328,0  
.00086696,2.2204e-016,0.00042177,0.00055025,0.00041074,6.7833e-  
005,2.2204e-016,0.0004003,0.0037053,7.6902e-005,0.0016312,2.2204e-  
016,2.2204e-016,2.2204e-016,0.0023092,0.00064577,2.2204e-016,2.2204e-  
016,0.00013906,0.00012353,2.2204e-016,0.00066459,2.2204e-  
016,0.00034791,2.2204e-016,0.00056458,1.9363e-005,2.2204e-  
016,0.00048524,9.8262e-005,2.2204e-016,2.2204e-  
016,0.0023501,0.00156,0.0027362,2.2204e-  
016,0.001347,0.0025262,0.0037056,0.00081782,0.00042785,5.9706e-  
005,0.00016284,0.00048887,8.5383e-005,0.00044502,0.00033369,2.2204e-  
016,2.2204e-016,0.0007048,0.00026871,0.00091467,2.2204e-016,2.2204e-  
016,0.00010884,2.2204e-016,2.2204e-016,2.2204e-016,2.2204e-  
016,0.0025795,0.0007665,2.2204e-  
016,0.0030216,0.0022421,0.0016647,0.0008328,2.2204e-016,2.2204e-  
016,2.2204e-016,2.2204e-016,2.2204e-016,2.2204e-  
016,0.00024277,2.2204e-016,8.647e-005,2.2204e-016,2.2204e-  
016,0.00048101,0.00011617,0.00033921,2.2204e-016,2.2204e-016,2.2204e-  
016,0.0057756,0.0090529,0.0032114,0.0011313,2.2204e-016,2.2204e-  
016,0.0010511,0.0042319,0.0025354,2.2204e-016,2.2204e-  
016,0.0025465,2.2204e-016,0.001929,0.00042155,2.2204e-016,2.2204e-  
016,0.0010545,2.2204e-016,4.3914e-  
005,0.00065252,0.00069383,0.0001924,2.2204e-016,0.00091482,2.2204e-  
016,0.00072326,2.2204e-016,5.3144e-  
005,0.00046,0.0078504,0.010407,2.2204e-016,2.2204e-016,2.2204e-  
016,0.0020773,2.2204e-016,2.2204e-016,2.2204e-016,2.2204e-  
016,0.0011699,2.2204e-016,0.00032578,0.0066833,2.2204e-  
016,0.0033828,2.2204e-016,2.2204e-016,2.2204e-016,2.2204e-016,7.4978e-  
005,0.00055378,2.2204e-016,0.00025663,0.00028416,2.2204e-  
016,0.00022903,2.2204e-016,0.00053638,2.2204e-  
016,0.00031616,0.00063417,2.2204e-016,0.0015932,0.010833,2.2204e-  
016,2.2204e-016,2.2204e-016,0.0010527,0.00027198,2.2204e-  
016,0.0050069,0.0010038,0.001163,2.2204e-016,0.00042157,2.2204e-  
016,0.0033497,2.2204e-016,2.2204e-016,2.2204e-  
016,0.0011293,0.00018675,2.2204e-  
016,0.00021625,0.00057062,0.00047586,2.2204e-016,0.00067801,9.9527e-  
005,0.00015424,2.2204e-016,2.2204e-016,2.2204e-016,2.2204e-  
016,5.3866e-005,2.2204e-016,0.0042168,0.0013903,2.2204e-  
016,0.0045759,2.2204e-016,0.00011304,0.014152,0.0028594,2.2204e-  
016,0.0022805,2.2204e-016,2.2204e-016,2.2204e-016,2.2204e-  
016,0.0022524,0.0032078,2.2204e-016,2.2204e-016,7.0906e-  
005,0.00036558,2.2204e-016,2.2204e-016,2.2204e-016,2.2204e-  
016,2.2204e-016,2.2204e-016,0.00046208,2.2204e-016,2.2204e-  
016,2.2204e-016,2.2204e-016,2.2204e-016,0.00060918,2.2204e-  
016,0.0004466,0.00171,0.0014373,0.0045642,2.2204e-016,2.2204e-  
016,0.00048161,2.2204e-016,2.2204e-016,0.00021602,6.4993e-  
005,0.00085894,2.2204e-016,0.0043531,2.2204e-016,2.2204e-016,2.2204e-  
016,2.2204e-016,0.0014211,0.0010674,2.2204e-016,2.2204e-  
016,0.00074974,0.00097061,2.2204e-016,2.2204e-016,2.2204e-016,2.2204e-  
016,2.2204e-016,2.2204e-016,0.00030821,0.00014477,2.2204e-016,2.2204e-  
016,2.2204e-016,0.00029623,2.2204e-016,2.2204e-  
016,0.00076889,0.00491,2.2204e-016,2.2204e-

016,0.0092434,0.003312,2.2204e-016,2.2204e-  
016,0.0015457,0.0014477,2.2204e-016,2.2204e-016,0.00083297,2.2204e-  
016,2.2204e-016,2.2204e-016,2.2204e-016,2.2204e-  
016,0.002396,0.00074063,2.2204e-016,2.2204e-016,2.2204e-  
016,0.00054858,2.2204e-016,4.7883e-005,0.00046754,2.2204e-016,2.2204e-  
016,0.00010218,2.2204e-016,2.2204e-016,0.00036163,2.2204e-  
016,0.00033785,2.2204e-016,2.2204e-016,0.00023344,0.0026037,2.2204e-  
016,0.002602,2.2204e-016,0.00024518,0.0066988,2.2204e-  
016,0.00020513,2.2204e-016,2.2204e-  
016,0.0035711,0.00168,0.0025765,0.0012604,2.2204e-  
016,0.0040794,0.0025297,2.2204e-016,0.0010219,2.2204e-  
016,0.00050531,2.2204e-016,2.2204e-016,2.2204e-016,2.2204e-  
016,2.2204e-016,2.2204e-016,0.00010723,2.2204e-016,2.2204e-  
016,0.00075836,0.00018907,2.2204e-016,2.2204e-016,0.00036172,2.2204e-  
016,2.2204e-016,0.0065963,0.0074173,0.001636,2.2204e-  
016,0.0073395,0.011687,2.2204e-016,0.0030989,2.2204e-016,2.2204e-  
016,0.0011509,0.00034056,2.2204e-016,2.2204e-016,0.00055302,2.2204e-  
016,2.2204e-  
016,0.0042755,0.0010912,0.0051182,0.00013043,0.00032144,2.2204e-  
016,2.2204e-016,2.2204e-016,2.2204e-016,2.0043e-005,5.5381e-  
005,0.00035245,2.2204e-016,0.00024997,2.2204e-016,0.00028554,6.7484e-  
005,0.00073585,8.8942e-005,2.2204e-016,2.2204e-  
016,0.0027771,0.005344,2.2204e-  
016,0.0027754,0.0072965,0.0014759,2.2204e-  
016,0.012965,0.0059087,2.2204e-016,2.2204e-016,2.2204e-  
016,0.0022333,2.2204e-016,2.2204e-016,2.2204e-016,2.2204e-016,2.2204e-  
016,0.00055856,2.2204e-016,2.2204e-016,2.2204e-016,2.2204e-  
016,2.2204e-016,2.2204e-016,5.0893e-  
005,0.00045025,0.00059649,0.00014085,2.2204e-016,2.2204e-016,2.2204e-  
016,9.6648e-005,0.00035727,6.5111e-007,2.2204e-016,2.2204e-  
016,2.0197e-005,0.0042917,0.0071391,2.2204e-  
016,0.0038206,0.0032837,2.2204e-016,2.2204e-016,0.0012758,2.2204e-  
016,2.2204e-016,0.00167,0.0014863,2.2204e-016,0.00064788,2.2204e-  
016,0.0022635,2.2204e-016,0.0015501,0.0017671,0.00048321,2.2204e-  
016,0.0001515,0.00012478,2.2204e-016,3.0021e-  
005,0.00063898,0.00084187,2.2204e-016,0.00032239,0.00013965,2.2204e-  
016,0.00022366,2.2204e-016,2.2204e-016,0.00029736,5.7447e-005,2.2204e-  
016,2.2204e-016,0.010134,2.2204e-016,0.0027364,0.0117,2.2204e-  
016,2.2204e-016,0.00077859,2.2204e-016,2.2204e-016,0.0031812,2.2204e-  
016,2.2204e-016,2.2204e-016,2.2204e-  
016,0.00082615,0.003298,0.0017596,2.2204e-016,3.2839e-005,2.2204e-  
016,0.00020948,2.2204e-016,2.2204e-016,0.00047871,8.7114e-  
005,0.000647,0.00012021,0.00049973,2.2204e-016,2.2204e-016,2.2204e-  
016,2.2204e-016,2.2204e-016,0.0005681,8.5151e-005,2.2204e-  
016,0.00059534,2.2204e-016,2.2204e-016,0.0037951,2.2204e-016,2.2204e-  
016,2.2204e-016,0.0016882,2.2204e-016,0.0029034,2.2204e-016,2.2204e-  
016,2.2204e-016,0.00015954,0.00072443,0.0028419,2.2204e-  
016,0.00079082,0.00046105,2.2204e-016,0.00065284,0.0026546,2.2204e-  
016,2.2204e-016,2.2204e-016,0.00073596,3.7675e-  
005,0.00011363,0.00024228,6.0761e-005,2.2204e-016,2.2204e-  
016,0.00012237,0.00044646,0.00011983,2.2204e-016,2.2204e-016,2.2204e-  
016,2.2204e-016,8.3404e-005,2.2204e-016,0.0016714,2.2204e-016,2.2204e-

016,0.0083293,0.0024968,2.2204e-016,2.2204e-016,0.0056312,2.2204e-016,2.2204e-016,2.2204e-016,2.2204e-016,2.2204e-016,2.2204e-016,2.2204e-016,0.00096505,2.2204e-016,2.2204e-016,0.00031312,2.2204e-016,2.2204e-016,2.2204e-016,2.2204e-016,2.2204e-016,0.0002649,2.2204e-016,4.862e-006,2.2204e-016,2.2204e-016,0.00016326,0.00048637,0.00016851,2.2204e-016,0.00026753,6.4778e-005,2.2204e-016,0.00069448,5.8082e-005,0.0068018,0.003355,0.01259,0.0047748,2.2204e-016,2.2204e-016,0.0016455,2.2204e-016,2.2204e-016,2.2204e-016,2.2204e-016,0.0016135,0.0010885,0.0023724,0.0013194,2.2204e-016,0.00073859,0.001934,2.2204e-016,0.00066759,0.00087351,2.2204e-016,2.2204e-016,2.2204e-016,2.2204e-016,2.2204e-016,5.3244e-006,2.2204e-016,5.2117e-005,2.2204e-016,2.2204e-016,2.2204e-016,2.2204e-016,2.2204e-016,7.235e-005,2.2204e-016,2.2204e-016,0.00023518,0.00074094,0.0005667,0.0007922,2.2204e-016,0.0013582,2.2204e-016,2.2204e-016,0.0047456,0.0024258,2.2204e-016,0.0038944,2.2204e-016,2.2204e-016,2.2204e-016,0.001134,2.2204e-016,2.2204e-016,0.0010158,0.00061582,0.0015529,0.0017018,2.2204e-016,0.00082659,2.2204e-016,6.1585e-005,0.00045533,2.2204e-016,8.2225e-005,0.00012233,2.2204e-016,0.00047323,2.2204e-016,2.2204e-016,2.2204e-016,9.2658e-005,2.2204e-016,2.2204e-016,0.00010638,0.00022799,2.2204e-016,2.2204e-016,2.2204e-016,2.2204e-016,0.0023326,0.00062971,0.0029726,2.2204e-016,0.0061914,0.0022686,2.2204e-016,0.0012581,0.011094,0.0003559,2.2204e-016,2.2204e-016,2.2204e-016,2.2204e-016,0.0050093,0.00012559,0.00019481,0.00031327,2.2204e-016,2.2204e-016,0.00032588,2.2204e-016,8.5067e-005,2.2204e-016,0.00010688,0.00016251,2.2204e-016,2.2204e-016,0.00023905,2.2204e-016,0.00022043,0.00050873,0.00048095,2.2204e-016,0.0030728,0.0022537,2.2204e-016,2.2204e-016,2.2204e-016,0.0026553,2.2204e-016,0.0015245,0.0002998,2.2204e-016,2.2204e-016,2.2204e-016,2.2204e-016,0.0022164,2.2204e-016,0.003087,0.00092101,2.2204e-016,2.2204e-016,0.00024823,0.00045633,3.0765e-005,0.00021527,0.00012637,0.00015934,2.2204e-016,2.2204e-016,2.2204e-016,2.2204e-016,2.2204e-016,0.00015629,0.0001823,2.2204e-016,2.2204e-016,2.2204e-016,2.2204e-016,0.00083505,0.0024282,0.00047908,0.0012823,2.2204e-016,2.2204e-016,0.0010445,2.2204e-016,2.2204e-016,2.2204e-016,0.00092733,0.00098556,0.0011401,0.00051396,0.0029868,2.2204e-016,8.2812e-006,2.2204e-016,2.2204e-016,7.3602e-005,2.2204e-016,2.2204e-016,4.1825e-005,8.2772e-005,2.2204e-016,2.2204e-016,2.2204e-016,2.2204e-016,4.4009e-005,0.00043474,7.3104e-005,2.2204e-016,0.00026338,2.2204e-016,2.2204e-016,1.6755e-006,2.2204e-016,2.2204e-016,2.2204e-016,2.2204e-016,0.0033496,2.2204e-016,0.0020938,2.2204e-016,0.0020014,0.00019899,0.0013393,2.2204e-016,2.2204e-016,2.2204e-016,0.00077177,2.2204e-016,0.0025826,0.00021757,2.2204e-016,2.5868e-006,2.2204e-016,0.00016543,0.00021722,0.00020217,0.00014661,3.8932e-005,2.2204e-016,2.2204e-016,2.2204e-016,0.00012628,2.2204e-016,2.2204e-016,2.7057e-005,0.00039763,0.00042493,0.00062253,0.00040936,2.2204e-016,2.2204e-016,2.2204e-016,0.0047284,2.2204e-016,0.0039183,0.0031035,0.003545,0.0049727,2.2204e-016

016,0.00040064,0.00015934,0.0013278,0.0015402,2.2204e-  
016,0.00017509,0.00023485,0.00014345,2.2204e-016,0.00016972,2.2204e-  
016,2.2204e-016,2.2204e-016,0.00040219,8.1617e-005,2.2204e-  
016,2.2204e-016,2.2204e-016,0.00014918,0.00021611,2.2204e-  
016,0.0002224,0.00016427,2.2204e-016,2.2204e-016,2.2204e-016,2.2204e-  
016,2.2204e-016,2.2204e-016,2.2204e-016,2.2204e-016,2.2204e-  
016,2.2204e-016,2.2204e-016,0.001167,2.2204e-016,0.011183,2.2204e-  
016,0.00025333,6.549e-005,2.2204e-016,2.2204e-016,0.00010657,2.2204e-  
016,0.00012064,2.2204e-016,0.00031624,0.00036097,0.00012907,2.2204e-  
016,5.4086e-005,0.00019601,0.00010111,6.4567e-005,2.2204e-016,2.2204e-  
016,0.00021367,2.2204e-016,2.2204e-016,3.7043e-005,0.00025134,9.5469e-  
005,2.2204e-016,0.0003307,0.00026567,0.00036709,0.00028273,2.2204e-  
016,0.00034661,2.2204e-016,2.2204e-016,2.2204e-016,2.2204e-  
016,2.2204e-016,2.2204e-016,2.2204e-016,0.00035461,2.2204e-  
016,2.2204e-016,5.618e-005,4.8203e-005,2.2204e-  
016,0.00016403,0.0001578,0.00047542,0.00033055,2.2204e-  
016,0.00043145,0.00026865,2.2204e-  
016,0.00041234,0.00011592,0.00016893,2.2204e-016,2.2204e-016,2.2204e-  
016,2.2204e-016,2.2204e-016,2.2204e-016,0.00050961,2.2204e-  
016,2.2204e-016,0.0004592,2.2204e-016,2.2204e-  
016,0.0049341,0.0046752,2.2204e-016,0.00033663,2.2204e-016,2.2204e-  
016,2.2204e-016,2.4495e-005,2.2204e-016,0.00014583,8.0077e-  
005,0.00044726,0.00013214,0.00011317,2.2204e-016,0.00017002,2.2204e-  
016,2.2204e-016,2.2204e-  
016,0.00027487,0.00033503,0.00043715,0.00012552,2.0069e-005,2.2204e-  
016,2.2204e-016,0.00016721,9.9366e-005,2.2204e-016,2.2204e-  
016,2.2204e-016,2.2204e-016,2.2204e-016,0.00065949,2.2204e-  
016,0.00038683,0.00032419,2.2204e-016,2.2204e-016,0.00026223,2.2204e-  
016,2.2204e-016,2.2204e-016,2.2204e-016,2.2204e-016,3.8334e-  
005,0.00029098,0.00016354,0.00029217,0.00032794,2.2204e-  
016,0.00028177,5.5759e-006,2.2204e-016,6.9708e-005,2.2204e-  
016,2.2204e-016,0.00029525,1.4146e-005,2.2204e-016,2.2204e-  
016,6.4195e-005,9.319e-005,0.00022123,2.2204e-016,0.00057248,2.2204e-  
016,0.00035829,0.00066802,0.0003141,2.2204e-016,0.00011194,2.2204e-  
016,0.00039944,2.2204e-016,2.2204e-016,0.00030854,2.2204e-  
016,0.00012372,0.00011749,0.00057616,2.2204e-016,2.2204e-  
016,0.0003457,7.226e-005,2.2204e-016,2.2204e-016,4.9801e-006,2.2204e-  
016,0.00035828,0.00029479,0.00084969,0.00026792,2.2204e-  
016,0.00046775,5.8107e-005,6.2519e-005,2.2204e-016,2.2204e-  
016,2.2204e-016,2.2204e-016,2.2204e-016,2.2204e-  
016,0.00045964,0.00028791,2.2204e-016,4.768e-005,2.2204e-016,2.2204e-  
016,2.2204e-016,2.2204e-016,0.00013269,5.3533e-005,2.2204e-  
016,0.00060201,2.2204e-016,2.2204e-016,2.2204e-016,0.00020988,2.2204e-  
016,0.00020189,0.00023329,2.3669e-005,0.00041125,2.2204e-  
016,0.00045814,2.2204e-016,0.00011429,0.00056002,0.00028314,2.2204e-  
016,0.00049097,0.00020015,2.2204e-016,1.5183e-005,2.2204e-  
016,0.00062935,2.2204e-016,2.2204e-016,0.0002617,2.2204e-016,2.2204e-  
016,0.00042088,0.0001179,2.2204e-016,2.2204e-016,0.00051377,2.2204e-  
016,0.00047862,0.0005078,2.2204e-016,0.0001206,2.2204e-016,2.2204e-  
016,0.00038701,2.2204e-016,2.2204e-016,0.00019772,0.00010044,2.2204e-  
016,0.00010489,2.2204e-016,2.2204e-016,0.00025834,2.2204e-  
016,0.00050362,0.00044668,2.2204e-016,0.00029026,2.2204e-

016,0.00072417,2.2204e-016,2.2204e-016,2.2204e-016,2.2204e-  
016,0.00027067,2.2204e-016,0.00034568,2.2204e-016,2.2204e-  
016,0.00014974,1.3377e-006,2.2204e-  
016,0.00054288,0.00038998,0.00032963,2.2204e-016,2.2204e-016,2.2204e-  
016,2.2204e-016,2.2204e-016,0.00041676,0.00055252,2.2204e-  
016,0.00052616,0.00024448,8.6205e-005,2.2204e-016,2.2204e-  
016,0.00012308,2.2204e-016,0.0001333,2.2204e-016,0.00017441,2.2204e-  
016,2.2204e-016,8.9472e-005,0.00016428,0.00019738,2.2204e-  
016,0.00035376,6.7724e-006,2.2204e-016,0.00031722,2.2204e-  
016,0.0002818,2.7015e-005,0.00058906,2.2204e-016,2.2204e-  
016,0.00017472,2.2204e-016,0.00023866,0.00018727,2.2204e-016,2.2204e-  
016,2.2204e-016,3.4101e-005,2.2204e-016,2.2204e-016,1.8177e-  
006,0.00022332,2.2227e-005,0.00034053,0.00035807,2.2204e-016,2.2204e-  
016,5.6887e-005,9.5369e-005,2.2204e-016,0.00079265,2.2204e-  
016,7.7626e-005,2.2204e-016,0.00038667,0.0005317,6.5277e-005,2.2204e-  
016,0.00027923,2.2204e-016,2.2204e-016,8.6367e-005,2.2204e-  
016,2.2204e-016,0.00026504,2.2204e-016,2.2204e-016,0.00033713,2.2204e-  
016,2.2204e-016,0.00014535,0.00012331,2.2204e-016,2.2204e-  
016,0.00010224,2.2204e-016,2.2204e-016,2.2204e-016,2.2204e-  
016,2.2204e-016,2.2204e-016,0.00053203,2.2204e-016,8.5882e-  
005,0.00044347,2.2204e-016,2.2204e-016,0.00049462,2.2204e-  
016,0.00025404,0.00018659,0.00033854,2.2204e-016,2.2204e-016,2.2204e-  
016,5.3655e-005,2.2204e-016,0.00050063,0.00021763,2.2204e-016,2.2204e-  
016,2.2204e-016,2.2204e-016,0.00020515,2.2204e-016,2.2204e-  
016,2.2204e-016,2.2204e-016,0.00043786,8.1501e-005,2.2204e-  
016,2.2204e-016,2.2204e-016,2.2204e-016,0.00031799,2.2204e-  
016,0.00064798,0.00034852,0.00035898,0.00015928,8.246e-  
005,0.00032725,0.00074255,2.2204e-016,2.2204e-016,4.7078e-005,2.2204e-  
016,2.2204e-016,2.2204e-016,4.405e-006,3.8136e-005,0.00052604,2.2204e-  
016,2.2204e-016,2.2204e-016,2.2204e-016,1.5349e-005,2.2204e-  
016,2.2204e-016,2.2204e-016,0.00052826,2.2204e-016,2.2204e-  
016,0.00018348,0.0006861,7.7899e-007,2.2204e-016,2.2204e-016,2.2204e-  
016,5.9994e-005,2.2204e-016,0.00021254,2.2204e-016,0.00015111  
0.070816,0.071326,0.071067,0.071711,0.071716,0.071574,0.071595,0.07174  
7,0.072179,0.071564,0.072601,0.071808,0.07168,0.071274,0.071569,0.0715  
61,0.072333,0.071694,0.071563,0.072002,1.3131,1.1369,1.2318,1.2256,0.0  
7023,0.071865,0.072883,0.071683,0.072018,0.071626,0.071739,0.072443,0.  
071215,0.071865,0.072043,0.071428,0.071492,0.071018,0.07153,2.3874,1.2  
122,1.2064,1.2248,1.2859,0.81986,1.2329,0.072184,0.071127,0.071446,0.0  
71898,0.071822,0.070363,0.072167,0.071625,0.072431,0.070916,0.07213,0.  
071891,0.070995,0.071848,0.07151,2.3783,2.3788,0.93041,1.1114,1.2299,1  
.2264,1.1987,1.3526,1.355,1.0654,0.071971,0.071553,0.071485,0.072176,0  
.071645,0.071923,0.071767,0.071456,0.071021,0.072402,0.072045,0.072193  
,0.070766,0.070955,0.071457,2.388,2.3768,2.3722,1.2522,1.335,1.4887,1.  
1368,1.3769,0.99796,1.6888,1.2544,1.2262,0.071801,0.071602,0.071059,0.  
071888,0.071254,0.07169,0.071692,0.071679,0.071086,0.071021,0.071894,0  
.072003,0.071525,0.070533,0.071311,0.070665,2.393,2.392,2.3856,2.3842,  
1.0515,1.3197,1.2362,1.2976,1.2147,1.2292,1.287,1.2293,1.2272,1.2301,0  
.071694,0.072053,0.071527,0.072716,0.070596,0.071599,0.07252,0.072424,  
0.071579,0.071718,0.072653,0.071197,0.072354,0.07028,0.070985,0.072401  
,2.3887,2.3923,2.3735,2.3895,2.3848,2.3899,1.2282,1.5091,1.2286,1.2267  
,1.2267,1.3065,1.2477,1.2341,1.2234,1.2481,0.071006,0.071392,0.071015,

0.071876,0.071322,0.072329,0.071185,0.07144,0.07163,0.071299,0.072006,  
0.070987,0.071948,0.07121,0.071938,0.072136,0.071036,2.3857,2.3985,2.3  
78,2.3833,2.3817,2.384,1.3082,1.2204,1.3999,1.2004,1.2722,1.451,1.2308  
,1.2279,1.2318,1.1704,1.3073,0.070785,0.072724,0.071794,0.070909,0.071  
652,0.072146,0.071453,0.071336,0.072345,0.071349,0.07172,0.070612,0.07  
0533,0.095104,0.091419,0.094108,0.071008,2.3878,2.3865,2.3806,2.3873,2  
.3849,2.3849,2.3969,1.2652,1.3662,1.2305,1.2252,1.3285,1.1653,0.96291,  
1.2306,1.2396,1.1886,1.2293,0.070994,0.071797,0.070742,0.071219,0.0709  
42,0.071664,0.070375,0.070051,0.072306,0.07085,0.071148,0.095853,0.098  
504,0.098387,0.096025,0.097736,0.099024,0.072869,2.3857,2.3904,2.3801,  
2.3842,2.3846,2.3848,2.3808,1.1012,1.2285,1.2293,1.2561,1.1401,1.3582,  
1.2272,1.4097,1.2269,1.2289,1.4754,0.071406,0.071547,0.072243,0.0726,0  
.071491,0.070697,0.070787,0.071219,0.071883,0.093561,0.098822,0.093061  
,0.09536,0.093054,0.094299,0.095399,0.10173,0.095128,0.071831,2.3895,2  
.3775,2.3848,2.3913,2.3869,2.3824,2.3803,1.3196,1.3427,1.3052,1.2236,1  
.0884,1.2245,1.2498,1.1128,1.2237,1.4524,1.1883,1.2291,0.070775,0.0717  
18,0.071568,0.072016,0.070924,0.071219,0.095552,0.095782,0.095559,0.09  
5349,0.094155,0.095229,0.095207,0.090586,0.095614,0.09529,0.097171,0.0  
96276,2.3852,2.3828,2.3859,2.3877,2.3866,2.3958,2.3853,1.2069,1.1645,1  
.3353,1.2302,1.2287,1.2796,1.1519,1.3857,1.332,1.285,1.1853,1.1253,0.0  
70829,0.072212,0.071203,0.096736,0.09113,0.095174,0.0885,0.095255,0.09  
4635,0.089643,0.10511,0.095965,0.095599,0.09269,0.096349,0.099867,0.09  
3334,0.095468,2.3947,2.3926,2.3861,2.3854,2.395,2.3965,2.3845,2.387,2.  
3798,1.2268,1.1463,1.0032,1.2312,1.2459,0.87491,1.2265,1.1887,1.1924,1  
.2966,1.2364,0.095685,0.091234,0.090909,0.095191,0.095299,0.095831,0.0  
97144,0.095518,0.085847,0.094534,0.09765,0.096201,0.095134,0.095223,0.  
096069,0.093308,0.08829,0.092886,2.3836,2.3884,2.3851,2.3819,2.3915,2.  
3863,2.3772,2.3983,2.3929,1.3035,1.2995,0.8683,0.86133,0.91669,0.9306,  
0.88798,0.92311,0.85858,0.88643,1.0584,0.099284,0.096067,0.095489,0.09  
5752,0.095169,0.10388,0.096525,0.094571,0.098184,0.095565,0.091684,0.0  
98602,0.094746,0.095954,0.09519,0.098276,0.096449,0.097587,2.3863,2.38  
99,2.3832,2.39,2.3911,2.3809,2.3802,2.3865,2.3824,1.2287,0.85978,0.976  
7,0.83821,0.8592,0.87022,0.85872,0.65004,0.76515,0.92489,0.83226,0.095  
331,0.10293,0.095589,0.095244,0.094367,0.095972,0.10154,0.095391,0.093  
646,0.096129,0.099457,0.095694,0.092433,0.094433,0.093654,0.092911,0.0  
95934,0.091236,2.4008,2.3824,2.3908,2.3947,2.3819,2.3727,2.3877,1.2679  
,1.4317,1.3904,0.92233,0.91154,0.85642,0.95539,0.96255,0.78989,0.87827  
,0.91143,0.76117,0.88959,0.095539,0.089813,0.095439,0.099075,0.10269,0  
.1011,0.099755,0.09592,0.09521,0.095313,0.094483,0.095164,0.095079,0.0  
95936,0.095509,0.096524,0.10532,0.093069,2.3811,2.3899,2.3822,2.3838,2  
.3764,2.391,1.3692,1.31,1.2022,0.97441,1.1445,0.85121,0.81088,0.92678,  
0.6376,0.75742,0.78901,1.1454,0.90052,1.0083,0.094756,0.096451,0.09496  
1,0.097558,0.099652,0.093682,0.09749,0.10297,0.094622,0.096665,0.09297  
4,0.10071,0.097556,0.093998,0.097259,0.095422,0.096797,0.10087,2.3859,  
2.3877,2.3853,2.3854,2.3907,1.1792,1.258,1.2487,1.1983,1.1788,1.2493,0  
.69331,0.63764,0.88371,0.76219,0.95662,0.85789,0.85452,0.85903,0.85597  
,0.09581,0.096994,0.093176,0.094689,0.095456,0.093786,0.09028,0.094578  
,0.097259,0.095693,0.096329,0.098299,0.095262,0.096657,0.096221,0.0953  
11,0.092942,0.093609,2.3886,2.3889,2.3964,1.2566,1.2365,1.2643,1.2514,  
1.2805,1.2513,1.2891,1.0385,0.8614,0.80781,0.86874,0.75541,0.7008,0.88  
564,0.85778,0.62891,0.85912,0.08416,0.094156,0.094788,0.094938,0.09514  
9,0.095099,0.096613,0.09519,0.09042,0.095801,0.094132,0.098685,0.09543

6, 0.098944, 0.10407, 0.094527, 0.094268, 0.096088, 2.3852, 1.3032, 1.3102, 1.1944, 1.2502, 1.4132, 1.2547, 1.4764, 1.2537, 1.2047, 0.58668, 0.85614, 0.90006, 0.82338, 0.71486, 0.85928, 0.96605, 0.82815, 0.805, 0.093507, 0.096533, 0.096885, 0.098868, 0.095949, 0.095296, 0.096443, 0.098724, 0.095583, 0.094648, 0.095395, 0.095426, 0.095222, 0.098422, 0.10011, 0.094333, 0.09522, 0.11922, 1.1112, 1.2473, 1.158, 0.83279, 1.3595, 0.83269, 1.0593, 1.3135, 1.3463, 1.2539, 0.8579, 0.86492, 1.0988, 0.64322, 0.81647, 1.0761, 0.8307, 0.89024, 0.75348, 0.093869, 0.094868, 0.095182, 0.093742, 0.094385, 0.091007, 0.09412, 0.099874, 0.095128, 0.10148, 0.095683, 0.094929, 0.092447, 0.09733, 0.095547, 0.094575, 0.095981, 0.11939, 1.3849, 1.469, 1.2716, 1.2476, 0.97592, 1.2496, 1.2545, 1.2746, 1.2536, 1.2867, 1.1045, 0.83605, 0.868, 0.86714, 0.85983, 0.97721, 0.83897, 0.78506, 0.095263, 0.097541, 0.098111, 0.09123, 0.094602, 0.091098, 0.095465, 0.092957, 0.094863, 0.095144, 0.097379, 0.095077, 0.094443, 0.099707, 0.095696, 0.095207, 0.097221, 0.096949, 0.1183, 1.3601, 1.2737, 0.8445, 1.1359, 1.336, 1.2157, 1.2532, 1.2701, 1.2615, 1.2501, 0.8876, 0.69352, 0.84004, 0.86186, 0.82668, 0.77209, 0.75788, 0.98172, 0.097722, 0.0955, 0.087324, 0.095409, 0.092461, 0.095481, 0.094933, 0.095309, 0.098536, 0.092277, 0.095267, 0.098437, 0.094265, 0.095795, 0.095732, 0.095264, 0.088027, 0.11957, 0.11879, 0.11933, 1.7167, 1.1739, 1.2525, 1.2498, 1.4861, 1.3254, 1.2533, 1.2527, 1.059, 0.85626, 0.66422, 0.71666, 0.88441, 0.8678, 0.8648, 0.097979, 0.094768, 0.095329, 0.090336, 0.10338, 0.099545, 0.092699, 0.094016, 0.10038, 0.096212, 0.094728, 0.094155, 0.098953, 0.091415, 0.1113, 0.099322, 0.091146, 0.094672, 0.11984, 0.11974, 0.1191, 0.11905, 1.2468, 1.413, 1.4649, 1.1817, 1.2563, 1.0277, 1.174, 1.1388, 1.2528, 0.52994, 0.86053, 0.70703, 0.098153, 0.095218, 0.080172, 0.097297, 0.097775, 0.096284, 0.096441, 0.095468, 0.089905, 0.095299, 0.095433, 0.091543, 0.097071, 0.095066, 0.083311, 0.093777, 0.094895, 0.093837, 0.095465, 0.093859, 0.11824, 0.11913, 0.11899, 0.11896, 0.11919, 0.11923, 1.3993, 1.4475, 1.2557, 1.2489, 1.7424, 1.0569, 1.3025, 1.2499, 0.089905, 0.094827, 0.091528, 0.094288, 0.094869, 0.093655, 0.089356, 0.095243, 0.096312, 0.094739, 0.095588, 0.091808, 0.094809, 0.09712, 0.098829, 0.097212, 0.098497, 0.095182, 0.095531, 0.097545, 0.095115, 0.095619, 0.09867, 0.11935, 0.1191, 0.1194, 0.11956, 0.11937, 0.11967, 1.2757, 1.2512, 1.3912, 1.3136, 1.3038, 0.11938, 0.11909, 0.096156, 0.094239, 0.099926, 0.095176, 0.095308, 0.09566, 0.095521, 0.094889, 0.095665, 0.094164, 0.09579, 0.094651, 0.095463, 0.085816, 0.088375, 0.096998, 0.094631, 0.095544, 0.094524, 0.095138, 0.095215, 0.11846, 0.11902, 0.11889, 0.11893, 0.1196, 0.11881, 0.11881, 0.11973, 0.11906, 0.11892, 1.2147, 1.3775, 0.11906, 0.11941, 0.1189, 0.11928, 0.093672, 0.10096, 0.092889, 0.096978, 0.097422, 0.091659, 0.095775, 0.095631, 0.095419, 0.09559, 0.095673, 0.092277, 0.095252, 0.095874, 0.09316, 0.095111, 0.095694, 0.094068, 0.097883, 0.1187, 0.11948, 0.11928, 0.11915, 0.1191, 0.11937, 0.11931, 0.11876, 0.12, 0.11893, 0.11933, 0.11971, 0.11909, 0.1187, 0.11938, 0.11898, 0.11895, 0.094975, 0.095238, 0.095587, 0.098885, 0.093874, 0.099268, 0.097273, 0.09582, 0.094736, 0.09211, 0.094605, 0.095556, 0.092266, 0.093105, 0.093828, 0.096726, 0.11942, 0.11921, 0.11927, 0.11932, 0.11899, 0.11961, 0.11911, 0.11969, 0.11897, 0.11968, 0.12026, 0.11912, 0.11887, 0.11883, 0.11912, 0.1197, 0.11916, 0.11888, 0.11939, 0.09948, 0.095178, 0.090183, 0.095743, 0.098773, 0.095224, 0.094001, 0.094557, 0.09521, 0.094906, 0.093266, 0.095486, 0.08864, 0.11936, 0.12016, 0.11962, 0.11861, 0.11929, 0.11918, 0.1195, 0.11903, 0.11913, 0.11886, 0.11876, 0.119, 0.11933, 0.1198, 0.11963, 0.11927, 0.11939, 0.11874, 0.11874, 0.11923, 0.11858, 0.095513, 0.099817, 0.096115, 0.096672, 0.09567, 0.10474, 0.095325, 0.095781, 0.095524, 0.11948, 0.11963, 0.1193, 0.11976, 0.11879, 0.11961, 0.11881, 0.11917, 0.11991, 0.11958, 0.119, 0.11962, 0.11948, 0.11868, 0.1195, 0.11901, 0.11995, 0.11878, 0.11886, 0.11933, 0.11931, 0



.11896,0.11958,0.11934,0.11883,0.099772,0.095023,0.092713,0.10267,0.11968,0.11858,0.11896,0.11947,0.11875,0.11937,0.11932,0.11885,0.1195,0.11932,0.11884,0.11936,0.11872,0.11915,0.11933,0.11884,0.11989,0.1195,0.11862,0.11942,0.11929,0.11962,0.11882,0.11896,0.11889,0.11874,0.11942,0.11904,0.11981,0.11911,0.11901,0.11909,0.11898,0.11876,0.11953,0.11937,0.11971,0.11934,0.11862,0.11908,0.11883,0.11831,0.11959,0.11983,0.11866,0.11974,0.11934,0.11918,0.11874,0.11916,0.1196,0.11932,0.1194,0.11918,0.11919,0.11914,0.11944,0.11963,0.11923,0.11927,0.11844,0.11964,0.11934,0.11936,0.12025,0.11909,0.11935,0.11952,0.11993,0.11944,0.1191,0.11938,0.11913,0.11953,0.11934,0.119,0.11897,0.11855,0.11942,0.11845,0.1187,0.1194,0.11933,0.11948,0.11921,0.1198,0.11911,0.11902,0.11939,0.11921,0.11887,0.11987,0.1191,0.1191,0.11961,0.11954,0.1195,0.11951,0.11915,0.11976,0.1192,0.1195,0.11927,0.11906,0.1188,0.11945,0.11919,0.1191,0.11999,0.11881,0.11874,0.11912,0.1198,0.11913,0.11896,0.11944,0.11923,0.11888,0.11886,0.11927,0.11874,0.11897,0.11948,0.11912,0.11939,0.11935,0.11915,0.11896,0.11977,0.11918,0.11955,0.11947,0.1195,0.11898,0.11866,0.11928,0.1196,0.11868,0.11983,0.11986,0.1193,0.11932,0.1191,0.11919,0.11976,0.11878,0.11846,0.11902,0.11901,0.11959,0.11949,0.11916,0.11895,0.11906,0.11818,0.11933,0.11862,0.11972,0.11973,0.11955,0.11929,0.11913,0.11956,0.11975,0.11905,0.11836,0.11927,0.1193,0.11922,0.11911,0.11946,0.11925,0.11975,0.11903,0.1189,0.11907,0.11871,0.11946,0.11939,0.11822,0.11934,0.11989,0.11907,0.11915,0.1193,0.11994,0.11927,0.11907,0.11943,0.11846,0.11917,0.11933,0.11954,0.11879,0.11936  
0.11513,0.11584,0.11532,0.11606,0.11604,0.11578,0.11568,0.11608,0.11653,0.11609,0.11733,0.11639,0.11608,0.1157,0.11595,0.11591,0.11668,0.11588,0.11687,0.11678,0.9119,0.79649,0.86064,0.85531,0.11441,0.1159,0.11709,0.11625,0.11659,0.11587,0.11672,0.11655,0.11568,0.11624,0.11626,0.11595,0.11586,0.11545,0.11624,1.5969,0.84757,0.84662,0.85469,0.89247,0.59506,0.86293,0.1163,0.11549,0.11621,0.11629,0.11609,0.11448,0.11647,0.11636,0.11672,0.1151,0.1167,0.11622,0.11553,0.11646,0.11625,1.5879,1.5911,0.66618,0.78365,0.85905,0.85488,0.83712,0.93614,0.93829,0.7522,0.11621,0.11602,0.11605,0.11678,0.11609,0.11606,0.11612,0.1156,0.11552,0.11665,0.11686,0.11626,0.11536,0.11611,0.11604,1.5988,1.5903,1.5865,0.87244,0.92435,1.0255,0.79601,0.95123,0.711,1.1519,0.8747,0.85604,0.11593,0.11614,0.11583,0.11639,0.11596,0.11597,0.11605,0.1164,0.11587,0.11558,0.11623,0.11638,0.11607,0.1145,0.11553,0.11536,1.6098,1.6022,1.5973,1.6023,0.74426,0.91537,0.86193,0.90359,0.8484,0.85743,0.89388,0.85703,0.857,0.85866,0.11633,0.11617,0.11631,0.11667,0.11495,0.11635,0.11733,0.1169,0.11621,0.11606,0.11731,0.11555,0.11669,0.11492,0.11555,0.11703,1.5956,1.6069,1.587,1.6013,1.5994,1.6012,0.8549,1.0366,0.85645,0.85628,0.85576,0.9074,0.87128,0.86343,0.85227,0.87207,0.11549,0.11575,0.11558,0.11608,0.11562,0.11708,0.11599,0.11586,0.11614,0.11588,0.11654,0.11579,0.11658,0.1155,0.11627,0.11637,0.11502,1.5984,1.6044,1.5903,1.6015,1.5967,1.5975,0.90851,0.84826,0.9692,0.84038,0.88591,0.99683,0.859,0.85525,0.85869,0.81812,0.90808,0.11531,0.11714,0.11598,0.11556,0.11589,0.11585,0.1159,0.11555,0.11689,0.11551,0.11641,0.11532,0.11511,0.13042,0.12805,0.1297,0.11538,1.6007,1.5964,1.5906,1.5987,1.5956,1.5966,1.6119,0.88046,0.94755,0.86062,0.85375,0.91983,0.816,0.68638,0.85983,0.86609,0.82951,0.85957,0.1158,0.11634,0.11521,0.11571,0.11494,0.11611,0.11471,0.11489,0.11663,0.11521,0.11598,0.13086,0.13248,0.13245,0.13125,0.13244,0.13281,0.11728,1.5983,1.6038,1.5928,1.5977,1.596,1.5955,1.5938,0.77375,0.85691,0.85881,0.87285,0.80172,0.9381,0.85554,0.97003,0.85

557,0.85771,1.0153,0.11564,0.11588,0.11666,0.11735,0.11581,0.11522,0.1  
1503,0.11543,0.11601,0.12941,0.13274,0.12919,0.13045,0.12904,0.12995,0  
.13057,0.13434,0.13036,0.11596,1.6038,1.589,1.596,1.5997,1.6,1.5953,1.  
5967,0.91669,0.92947,0.90666,0.85356,0.76909,0.85428,0.86976,0.78191,0  
.8551,1.0018,0.83136,0.85984,0.11532,0.11609,0.11612,0.11616,0.11549,0  
.11592,0.13106,0.13096,0.13056,0.13068,0.12994,0.13053,0.1305,0.1276,0  
.13051,0.13087,0.13168,0.13143,1.5994,1.5966,1.5953,1.6025,1.6013,1.60  
84,1.5998,0.84238,0.8169,0.92517,0.85845,0.85782,0.88802,0.808,0.95827  
,0.9241,0.89299,0.8291,0.78918,0.11497,0.11677,0.11592,0.13147,0.12774  
,0.13046,0.12646,0.1305,0.13038,0.12703,0.13655,0.13124,0.13075,0.1291  
,0.13121,0.13357,0.12947,0.13055,1.6055,1.6043,1.5998,1.5985,1.6067,1.  
605,1.5988,1.598,1.5924,0.85477,0.80503,0.71453,0.86038,0.86869,0.6307  
4,0.85706,0.8278,0.83465,0.90108,0.86254,0.13111,0.12814,0.12788,0.130  
72,0.13054,0.1309,0.13174,0.13099,0.12497,0.13015,0.13249,0.13098,0.13  
065,0.13071,0.13138,0.12951,0.12606,0.12929,1.596,1.6003,1.5946,1.5962  
,1.606,1.5966,1.5909,1.6114,1.6051,0.90783,0.90231,0.62501,0.62233,0.6  
5749,0.66547,0.63829,0.66228,0.61896,0.63848,0.74864,0.13281,0.13108,0  
.13058,0.13075,0.13044,0.13609,0.13155,0.13034,0.13235,0.13081,0.12812  
,0.1328,0.13054,0.13106,0.13056,0.13243,0.13098,0.13204,1.5954,1.6081,  
1.5979,1.6036,1.6019,1.5968,1.5969,1.6044,1.5961,0.85663,0.62043,0.696  
57,0.6072,0.62117,0.62778,0.6189,0.48575,0.55983,0.66448,0.60312,0.130  
54,0.13527,0.13085,0.13049,0.13005,0.13125,0.13463,0.13056,0.12952,0.1  
3118,0.13314,0.13083,0.12874,0.12998,0.12978,0.1291,0.13098,0.1282,1.6  
108,1.596,1.6034,1.6081,1.5967,1.5882,1.5979,0.88091,0.987,0.95888,0.6  
5879,0.65265,0.6174,0.68231,0.68578,0.57622,0.63447,0.65456,0.55611,0.  
63807,0.1309,0.12716,0.13076,0.13305,0.13546,0.13433,0.13341,0.13109,0  
.13041,0.13038,0.1299,0.13033,0.1305,0.1311,0.13072,0.13127,0.13725,0.  
12908,1.5982,1.6028,1.5931,1.5968,1.5918,1.6083,0.94448,0.90715,0.8403  
3,0.69297,0.80228,0.61505,0.58968,0.6638,0.47761,0.55649,0.57437,0.802  
32,0.64712,0.71601,0.13015,0.1313,0.13037,0.13225,0.13316,0.12973,0.13  
215,0.13525,0.1304,0.13151,0.12897,0.13396,0.13207,0.1295,0.13211,0.13  
064,0.1313,0.13403,1.5967,1.6008,1.6007,1.5997,1.6069,0.82552,0.87459,  
0.86984,0.83797,0.82496,0.86865,0.51299,0.47797,0.63703,0.55809,0.6838  
1,0.61917,0.61734,0.62093,0.6197,0.13103,0.13128,0.12932,0.13015,0.130  
67,0.1296,0.12752,0.13029,0.13177,0.1309,0.13127,0.13259,0.1307,0.1315  
6,0.13105,0.13051,0.12923,0.12927,1.6002,1.6067,1.6087,0.8752,0.86088,  
0.87687,0.87402,0.88794,0.86961,0.89388,0.73585,0.62392,0.58927,0.6262  
9,0.55336,0.51905,0.6366,0.62056,0.47262,0.61924,0.12337,0.13008,0.130  
31,0.13021,0.13077,0.13034,0.13125,0.13058,0.12741,0.13064,0.12987,0.1  
3275,0.13083,0.13279,0.1359,0.1302,0.13002,0.13116,1.5992,0.90418,0.90  
943,0.83481,0.8698,0.97557,0.87585,1.0148,0.87347,0.84042,0.44489,0.61  
754,0.6466,0.59652,0.52698,0.62177,0.68849,0.6008,0.58763,0.1293,0.131  
65,0.13146,0.13281,0.13132,0.13062,0.13139,0.13281,0.13079,0.13024,0.1  
3081,0.13071,0.1306,0.13256,0.13372,0.1301,0.13044,0.14544,0.78008,0.8  
6447,0.81208,0.60321,0.9428,0.60303,0.74953,0.9104,0.93244,0.87233,0.6  
1732,0.62363,0.7779,0.48097,0.59347,0.75962,0.60042,0.63937,0.55232,0.  
1297,0.13035,0.13053,0.12971,0.12993,0.12791,0.12954,0.13341,0.13019,0  
.13439,0.13084,0.13023,0.12863,0.13215,0.13081,0.13016,0.13108,0.1455,  
0.95774,1.0102,0.88386,0.86746,0.69355,0.86989,0.87501,0.88502,0.87211  
,0.89149,0.7782,0.60406,0.62632,0.62425,0.62038,0.69595,0.60928,0.5726  
3,0.13047,0.13194,0.13229,0.12832,0.13024,0.12787,0.13061,0.12886,0.13  
041,0.13039,0.13179,0.13062,0.13009,0.13309,0.1306,0.13035,0.1318,0.13

156,0.14475,0.93999,0.88511,0.60971,0.79847,0.92532,0.84976,0.87326,0.88135,0.87642,0.86927,0.63785,0.51467,0.60986,0.62284,0.59983,0.56471,0.55559,0.69909,0.13206,0.13076,0.12576,0.13045,0.12899,0.13081,0.13055,0.13046,0.13266,0.12893,0.13034,0.13278,0.1303,0.13066,0.13086,0.13052,0.12604,0.14573,0.1447,0.14508,1.1688,0.82242,0.87015,0.8684,1.0237,0.91946,0.87193,0.87076,0.74886,0.61924,0.49452,0.52875,0.63701,0.62613,0.62376,0.13228,0.13012,0.13049,0.12743,0.13546,0.13323,0.12899,0.12985,0.13368,0.13111,0.13034,0.1296,0.13285,0.12831,0.14019,0.13304,0.12797,0.13023,0.14556,0.14559,0.1451,0.14521,0.86646,0.97537,1.0061,0.82606,0.87661,0.72994,0.82502,0.79842,0.87357,0.40871,0.62181,0.52272,0.13235,0.13059,0.12097,0.1321,0.13205,0.13102,0.13147,0.13051,0.12745,0.13065,0.13074,0.12833,0.13144,0.13057,0.12338,0.1296,0.13026,0.12979,0.13095,0.12999,0.14436,0.14519,0.14532,0.14503,0.1452,0.14529,0.96546,0.99675,0.87117,0.86776,1.1843,0.74545,0.90776,0.87102,0.1273,0.13034,0.12785,0.12997,0.13067,0.1295,0.12695,0.13048,0.13111,0.1302,0.1308,0.12845,0.13018,0.13196,0.13256,0.13198,0.13261,0.13037,0.13058,0.13178,0.13047,0.1308,0.13271,0.14527,0.14529,0.1456,0.14562,0.14553,0.14571,0.88645,0.87107,0.96137,0.91149,0.89867,0.14536,0.14505,0.13114,0.13,0.13341,0.13041,0.13058,0.13097,0.13092,0.13017,0.13092,0.13015,0.13119,0.13019,0.13063,0.12502,0.12657,0.13165,0.13017,0.13064,0.13035,0.1305,0.13042,0.14447,0.14501,0.14476,0.14524,0.1459,0.14494,0.14508,0.14582,0.14537,0.14513,0.84839,0.95345,0.14511,0.14553,0.14514,0.14537,0.12966,0.13401,0.12891,0.13153,0.13191,0.12858,0.13101,0.13101,0.13043,0.13087,0.13086,0.12876,0.13055,0.13116,0.12927,0.13066,0.13068,0.12972,0.13209,0.1447,0.1455,0.14541,0.14496,0.1451,0.14557,0.1455,0.14471,0.14594,0.14507,0.14537,0.14564,0.1452,0.14482,0.14538,0.14492,0.14491,0.13036,0.13013,0.13092,0.13293,0.12993,0.13287,0.13204,0.13106,0.13025,0.12852,0.13011,0.13088,0.12884,0.12937,0.12964,0.13167,0.1453,0.14535,0.14558,0.14558,0.14495,0.14574,0.14537,0.14566,0.14515,0.14604,0.14576,0.14507,0.14507,0.14494,0.14488,0.14625,0.14537,0.14489,0.14559,0.13315,0.13072,0.12727,0.13096,0.13268,0.13045,0.12998,0.13014,0.13065,0.13045,0.12927,0.13083,0.1266,0.14536,0.1461,0.14563,0.14475,0.1452,0.1452,0.14534,0.14492,0.14544,0.14537,0.14494,0.14501,0.14572,0.14588,0.14576,0.14543,0.14523,0.145,0.14468,0.14519,0.14454,0.13107,0.1336,0.13125,0.13162,0.1306,0.13631,0.13061,0.131,0.13073,0.14579,0.14575,0.14566,0.14552,0.14521,0.14558,0.14492,0.14512,0.14602,0.14548,0.14504,0.14583,0.1454,0.14454,0.1456,0.14504,0.14566,0.1446,0.14497,0.14553,0.14551,0.14505,0.14554,0.14541,0.14492,0.13334,0.13047,0.12932,0.13525,0.14591,0.14506,0.14504,0.14529,0.14476,0.14541,0.14576,0.14502,0.14566,0.14548,0.14487,0.14526,0.14457,0.14545,0.14556,0.14503,0.1458,0.14567,0.14454,0.14553,0.1454,0.14586,0.14493,0.14475,0.14507,0.14488,0.14511,0.14507,0.14573,0.14488,0.14539,0.14526,0.14521,0.14493,0.1456,0.14531,0.14532,0.14563,0.14487,0.14541,0.14539,0.14462,0.1455,0.14592,0.14476,0.14573,0.14518,0.14526,0.14501,0.14518,0.14554,0.14578,0.1455,0.1452,0.14545,0.14536,0.1454,0.14573,0.14544,0.14545,0.14484,0.14566,0.14543,0.14525,0.14633,0.14494,0.14553,0.14551,0.1461,0.14547,0.14523,0.14545,0.14548,0.1456,0.14527,0.14513,0.14531,0.14457,0.14557,0.14474,0.14538,0.14533,0.14533,0.14538,0.14505,0.14541,0.14522,0.14524,0.14527,0.14538,0.14495,0.14575,0.14519,0.14509,0.14588,0.14586,0.14549,0.14521,0.14511,0.1458,0.1456,0.1456,0.14576,0.14534,0.14512,0.14576,0.14548,0.14528,0.14584,0.14494,0.14479,0.14507,0.14572,0.14534,0.14482,0.14543,0.14503,0.14482,0.14485,0.14528,0.14487,0.14527,0.14568,0.

14541,0.14549,0.14564,0.14534,0.1449,0.14593,0.14516,0.14567,0.14553,0.14582,0.14521,0.14475,0.14533,0.14569,0.14478,0.14589,0.14599,0.14552,0.14542,0.14534,0.14497,0.14563,0.14505,0.14469,0.14504,0.14514,0.14571,0.14535,0.14528,0.14526,0.14501,0.14469,0.14545,0.14503,0.14588,0.14574,0.14553,0.14538,0.1452,0.1456,0.14577,0.14506,0.14458,0.1454,0.14567,0.14532,0.14542,0.14549,0.1455,0.14566,0.14519,0.14481,0.14528,0.14456,0.14542,0.14531,0.14446,0.14534,0.14577,0.14528,0.14533,0.14537,0.14589,0.14555,0.14516,0.14541,0.14466,0.14519,0.1457,0.14577,0.14488,0.14549  
0.14332,0.14401,0.14364,0.14407,0.14397,0.14361,0.14348,0.14404,0.14433,0.14417,0.14482,0.14437,0.14397,0.1436,0.14371,0.14353,0.14471,0.1434,0.14474,0.14502,0.66776,0.59274,0.63486,0.63023,0.14241,0.14397,0.14501,0.14398,0.14463,0.14371,0.14502,0.14443,0.14375,0.14437,0.14481,0.14389,0.14421,0.14327,0.14409,1.1228,0.62405,0.62402,0.63098,0.65245,0.45959,0.63743,0.14444,0.14352,0.14414,0.14436,0.14396,0.14198,0.14403,0.14411,0.14471,0.14341,0.14436,0.1439,0.14362,0.14392,0.14448,1.1099,1.1111,0.50643,0.58186,0.63416,0.63058,0.61779,0.68347,0.68489,0.56136,0.14408,0.14434,0.1437,0.14491,0.14424,0.14448,0.14415,0.1437,0.14316,0.14443,0.14473,0.14439,0.14375,0.14425,0.14372,1.1194,1.1157,1.1071,0.63897,0.6741,0.74265,0.59052,0.69637,0.53601,0.82474,0.64221,0.63065,0.14365,0.14423,0.14389,0.14433,0.14403,0.14382,0.14428,0.14425,0.14372,0.14331,0.1443,0.14418,0.14418,0.14284,0.14308,0.14317,1.1293,1.1238,1.122,1.1256,0.55667,0.66924,0.63635,0.66442,0.6265,0.63321,0.65546,0.63149,0.63104,0.63482,0.14456,0.14444,0.14418,0.14453,0.14287,0.14426,0.145,0.14442,0.14399,0.14355,0.14485,0.14323,0.14455,0.14311,0.14384,0.14492,1.1181,1.129,1.1058,1.1261,1.1206,1.122,0.63008,0.75004,0.63097,0.63174,0.63187,0.66626,0.64169,0.63739,0.62738,0.64182,0.14369,0.14401,0.14405,0.14407,0.14338,0.14484,0.1439,0.14412,0.144,0.14388,0.14445,0.14333,0.14472,0.14293,0.14422,0.14413,0.14274,1.1158,1.1224,1.1145,1.1267,1.117,1.1172,0.66583,0.62439,0.70727,0.62167,0.65418,0.72404,0.63259,0.62953,0.63472,0.60378,0.66686,0.14356,0.14503,0.14354,0.14339,0.1439,0.14376,0.14414,0.14317,0.14474,0.14338,0.14436,0.14337,0.14321,0.13953,0.13996,0.13974,0.14334,1.1214,1.1201,1.1129,1.1202,1.1173,1.1253,1.135,0.64715,0.69286,0.63423,0.62724,0.67269,0.60532,0.51859,0.63504,0.63989,0.61418,0.6326,0.14376,0.14425,0.14331,0.14378,0.14295,0.14375,0.1425,0.14278,0.14475,0.14323,0.1438,0.13969,0.13898,0.13901,0.14012,0.13973,0.13925,0.14509,1.1178,1.1267,1.1159,1.122,1.1183,1.1121,1.1181,0.57811,0.63178,0.63276,0.63927,0.59646,0.68087,0.62845,0.70635,0.63249,0.63327,0.73615,0.14368,0.14386,0.14479,0.1448,0.14353,0.14342,0.14303,0.14322,0.14341,0.13984,0.13981,0.14033,0.13944,0.13995,0.13983,0.13998,0.13853,0.13945,0.14391,1.1228,1.1124,1.1234,1.1224,1.1223,1.1158,1.1231,0.67157,0.67967,0.66563,0.62711,0.57586,0.62996,0.64082,0.5821,0.62803,0.73093,0.61457,0.63439,0.14333,0.1441,0.14418,0.1441,0.14352,0.14383,0.14021,0.14004,0.13925,0.13979,0.13998,0.13995,0.13977,0.14056,0.14001,0.13981,0.13926,0.13996,1.1225,1.1207,1.1173,1.1166,1.1246,1.1251,1.1208,0.62362,0.60476,0.6763,0.62971,0.63215,0.65161,0.60153,0.69805,0.67697,0.65843,0.61292,0.58538,0.14266,0.14494,0.14441,0.13972,0.13987,0.13982,0.14057,0.13971,0.14021,0.14031,0.13791,0.14019,0.14005,0.14008,0.13944,0.13941,0.14027,0.13972,1.1259,1.1254,1.1219,1.1159,1.1292,1.1237,1.118,1.1195,1.1149,0.62916,0.59759,0.5387,0.63398,0.6393,0.48283,0.63144,0.61095,0.61783,0.65914,0.63823,0.14036,0.14033,0.14048,0.14006,0.1396,0.13924,0.13976,0.14005,0.14171,0.139

45,0.14012,0.13935,0.13995,0.13998,0.14024,0.14004,0.14109,0.14043,1.1  
19,1.1182,1.1185,1.1168,1.1246,1.1208,1.1149,1.1327,1.1267,0.66654,0.6  
609,0.46979,0.46795,0.49215,0.49662,0.47846,0.49468,0.46521,0.47975,0.  
55153,0.13903,0.1396,0.13983,0.1395,0.1397,0.13881,0.14018,0.14054,0.1  
3933,0.13993,0.13999,0.13962,0.14016,0.14018,0.13986,0.13938,0.139,0.1  
397,1.1156,1.1335,1.1162,1.1218,1.1234,1.1215,1.1218,1.1238,1.113,0.61  
64,0.46662,0.52083,0.4585,0.46695,0.47388,0.46611,0.37713,0.42635,0.49  
962,0.45782,0.1394,0.13877,0.14018,0.13976,0.13988,0.14041,0.13949,0.1  
3939,0.14041,0.14013,0.13895,0.1397,0.14027,0.13972,0.1406,0.14055,0.1  
3951,0.14049,1.1285,1.1179,1.1271,1.1304,1.1168,1.11,1.1201,0.63202,0.  
70504,0.68565,0.48994,0.4897,0.46558,0.50904,0.51181,0.43811,0.47684,0  
.49037,0.42512,0.47962,0.14016,0.14068,0.13999,0.13963,0.13876,0.13945  
,0.1394,0.14025,0.13962,0.13968,0.13974,0.13928,0.1399,0.14039,0.14008  
,0.13919,0.13923,0.13998,1.1171,1.1242,1.1156,1.1148,1.1118,1.1325,0.6  
7653,0.6501,0.60673,0.50602,0.5803,0.46308,0.44478,0.49772,0.37113,0.4  
2393,0.43637,0.58386,0.48588,0.53085,0.1396,0.13943,0.13963,0.14017,0.  
13905,0.14022,0.14023,0.13853,0.14036,0.13961,0.14002,0.13949,0.13958,  
0.13934,0.13984,0.13979,0.13939,0.13931,1.1165,1.1162,1.1247,1.1261,1.  
1259,0.59625,0.62633,0.62548,0.60692,0.59664,0.62548,0.39385,0.3713,0.  
48261,0.42319,0.50714,0.46657,0.4664,0.46771,0.46753,0.13988,0.13861,0  
.13993,0.13947,0.14005,0.1395,0.14062,0.14007,0.13946,0.14006,0.13973,  
0.13967,0.13981,0.14002,0.13994,0.13986,0.14073,0.13995,1.121,1.1284,1  
.1309,0.63091,0.61888,0.63103,0.63162,0.63912,0.625,0.64373,0.53577,0.  
46876,0.44612,0.47065,0.41872,0.3991,0.47797,0.46723,0.36729,0.46522,0  
.14104,0.13997,0.13948,0.13945,0.13993,0.13945,0.13902,0.13996,0.14023  
,0.13933,0.14003,0.13911,0.1399,0.13914,0.138,0.14015,0.14091,0.14007,  
1.1228,0.64798,0.65646,0.60285,0.62519,0.69807,0.63193,0.7241,0.62979,  
0.60404,0.34734,0.46534,0.48478,0.45148,0.40573,0.46839,0.51263,0.4526  
2,0.44551,0.13985,0.14032,0.13947,0.13918,0.14017,0.1399,0.13978,0.139  
28,0.13986,0.1402,0.1398,0.13986,0.13965,0.13957,0.13866,0.14004,0.139  
72,0.13593,0.56854,0.62021,0.58721,0.44533,0.67716,0.4447,0.54558,0.65  
26,0.67041,0.62993,0.46454,0.47223,0.57024,0.3722,0.44846,0.5618,0.454  
4,0.4781,0.42101,0.14027,0.14,0.14028,0.14024,0.13965,0.14088,0.13938,  
0.13913,0.13942,0.13902,0.13978,0.13933,0.13991,0.14005,0.13985,0.1404  
7,0.14006,0.13587,0.6882,0.72258,0.63801,0.62458,0.50703,0.62698,0.629  
77,0.63384,0.62762,0.6418,0.57335,0.45474,0.47003,0.46754,0.46767,0.51  
796,0.46044,0.43615,0.13966,0.13938,0.13941,0.14117,0.13978,0.14074,0.  
13981,0.13996,0.13979,0.13967,0.13944,0.13979,0.13995,0.13912,0.1397,0  
.13926,0.13935,0.13975,0.13542,0.67259,0.63775,0.44912,0.57989,0.66097  
,0.61148,0.63289,0.63448,0.63009,0.62648,0.47751,0.39467,0.46065,0.469  
22,0.45362,0.4297,0.42552,0.5198,0.13931,0.14006,0.1412,0.13936,0.1403  
8,0.13981,0.14011,0.13965,0.13946,0.14048,0.13957,0.13984,0.1407,0.139  
16,0.13997,0.13991,0.14128,0.13606,0.13521,0.13565,0.83061,0.59674,0.6  
2616,0.62452,0.73274,0.66034,0.62706,0.62709,0.54504,0.46525,0.38319,0  
.40615,0.48102,0.47073,0.46894,0.13952,0.1393,0.13944,0.1403,0.13846,0  
.13913,0.14028,0.13999,0.1388,0.13956,0.14004,0.13949,0.13917,0.14047,  
0.13665,0.13922,0.14044,0.1404,0.13595,0.13623,0.13568,0.13555,0.62227  
,0.69854,0.71585,0.59711,0.63298,0.53505,0.5974,0.57829,0.62984,0.3261  
1,0.46994,0.4013,0.13916,0.13971,0.14216,0.14004,0.13929,0.13937,0.139  
59,0.13963,0.1408,0.14021,0.13994,0.14018,0.13913,0.13982,0.14194,0.14  
,0.13942,0.14031,0.14001,0.14029,0.13473,0.13554,0.13578,0.13541,0.135  
73,0.13591,0.6894,0.71276,0.62515,0.62359,0.83979,0.5419,0.65424,0.626

75,0.14085,0.1402,0.13975,0.13997,0.14037,0.13932,0.1411,0.13978,0.13955,0.14034,0.13987,0.14013,0.13985,0.14016,0.13878,0.13954,0.13955,0.13965,0.13973,0.13928,0.1398,0.14001,0.1397,0.13578,0.1359,0.13622,0.13579,0.13602,0.13603,0.63858,0.6271,0.6902,0.65443,0.63975,0.13583,0.13563,0.13955,0.13972,0.13904,0.13952,0.1396,0.14018,0.14026,0.13939,0.13987,0.14039,0.1403,0.14004,0.13989,0.14204,0.14144,0.13962,0.14035,0.13968,0.14068,0.13968,0.1397,0.13497,0.1356,0.13526,0.13594,0.13646,0.13505,0.1355,0.13617,0.13607,0.13571,0.61202,0.6853,0.13573,0.13599,0.13582,0.13572,0.14031,0.13892,0.1402,0.13933,0.13961,0.14095,0.14005,0.14007,0.13963,0.14014,0.13978,0.14,0.13962,0.14034,0.14039,0.14027,0.13968,0.13979,0.13971,0.13516,0.1359,0.13597,0.13489,0.13536,0.13617,0.13568,0.13536,0.13616,0.1355,0.13565,0.1361,0.13584,0.1354,0.13617,0.1355,0.13543,0.13985,0.13932,0.14003,0.13913,0.14046,0.13932,0.13967,0.14041,0.13939,0.14028,0.13974,0.14015,0.14059,0.14062,0.13997,0.14017,0.13555,0.13569,0.13585,0.13609,0.13561,0.13614,0.13573,0.13584,0.13584,0.13627,0.13608,0.13564,0.13573,0.1354,0.13536,0.13609,0.13571,0.13533,0.13568,0.13917,0.1399,0.14061,0.14027,0.13925,0.13976,0.14038,0.13994,0.1399,0.13992,0.14037,0.13986,0.14145,0.13567,0.13635,0.13616,0.13536,0.13557,0.13535,0.13576,0.13532,0.13571,0.13548,0.13543,0.13544,0.136,0.13604,0.1361,0.13619,0.13564,0.13537,0.13535,0.13543,0.13534,0.14012,0.1391,0.13984,0.13987,0.13937,0.13791,0.13984,0.13998,0.13956,0.13588,0.136,0.13621,0.13596,0.13552,0.13578,0.13547,0.13583,0.13663,0.13579,0.13551,0.13624,0.13592,0.13514,0.13624,0.1353,0.13614,0.13517,0.13541,0.13576,0.13608,0.13537,0.13589,0.13557,0.13562,0.13883,0.1403,0.14072,0.13905,0.1366,0.13523,0.13541,0.13576,0.13537,0.13607,0.13614,0.13541,0.13608,0.13584,0.1354,0.13572,0.13476,0.13554,0.13581,0.13533,0.13639,0.13549,0.13519,0.13559,0.13583,0.1361,0.13579,0.13528,0.13542,0.13538,0.13546,0.1356,0.13613,0.13536,0.13572,0.13551,0.13573,0.13565,0.13591,0.13567,0.13605,0.13565,0.13541,0.13591,0.136,0.13514,0.13589,0.13659,0.13506,0.136,0.13564,0.1356,0.1356,0.13564,0.13595,0.13617,0.13571,0.13547,0.13599,0.13575,0.13556,0.13607,0.13602,0.13577,0.13546,0.13599,0.1356,0.13569,0.1367,0.13531,0.13609,0.13612,0.13647,0.13569,0.13556,0.1358,0.1359,0.13597,0.13558,0.1353,0.13556,0.13518,0.13575,0.13513,0.1361,0.13595,0.13562,0.13551,0.1355,0.13561,0.13575,0.13566,0.13534,0.13618,0.13525,0.13653,0.13535,0.13554,0.136,0.13642,0.13604,0.13572,0.13547,0.13614,0.13609,0.13581,0.13614,0.13575,0.13545,0.13614,0.13575,0.13563,0.1361,0.13548,0.13535,0.13565,0.13605,0.13578,0.13542,0.1358,0.13549,0.1353,0.1354,0.1357,0.1351,0.1356,0.13599,0.13557,0.13578,0.13593,0.13552,0.13536,0.13621,0.13563,0.13582,0.13613,0.13605,0.13567,0.13513,0.13584,0.13634,0.13529,0.13606,0.13629,0.13575,0.13543,0.1358,0.1356,0.13602,0.13567,0.13493,0.13534,0.13585,0.13603,0.13581,0.13539,0.13543,0.13534,0.13524,0.13587,0.13549,0.13646,0.13593,0.13597,0.13551,0.13569,0.13583,0.13618,0.13563,0.13496,0.13602,0.13611,0.13576,0.13584,0.13577,0.13606,0.13594,0.13569,0.13532,0.13588,0.13484,0.13572,0.13581,0.13488,0.13582,0.13644,0.13572,0.13549,0.13605,0.13637,0.13552,0.13551,0.13556,0.13475,0.13569,0.13619,0.13619,0.13558,0.13598

0.16157,0.16203,0.16144,0.16186,0.16109,0.16098,0.1623,0.16187,0.16186,0.16194,0.16256,0.16242,0.16167,0.16123,0.16189,0.16119,0.1625,0.16114,0.16231,0.16237,0.51982,0.46951,0.49694,0.49445,0.16056,0.16225,0.16267,0.16162,0.16222,0.16151,0.16289,0.16203,0.16173,0.16208,0.16249,0.16197,0.16277,0.16097,0.16177,0.8341,0.49069,0.49001,0.4944,0.50675,0.

37728,0.49872,0.16216,0.16174,0.16219,0.16202,0.16154,0.15968,0.1624,0.16176,0.1624,0.16109,0.16192,0.16144,0.16136,0.16168,0.16231,0.82395,0.82012,0.41025,0.46123,0.49715,0.49514,0.48597,0.52803,0.53277,0.44725,0.16168,0.16234,0.16141,0.16278,0.16224,0.16193,0.16174,0.16116,0.16129,0.16217,0.16269,0.16205,0.16143,0.16172,0.16167,0.82613,0.82963,0.81875,0.49626,0.52489,0.56852,0.4656,0.53977,0.43096,0.62955,0.49999,0.49707,0.16148,0.16197,0.16198,0.16237,0.16178,0.16126,0.16169,0.16181,0.16189,0.16135,0.16187,0.16216,0.16204,0.16056,0.16097,0.16165,0.83787,0.83088,0.8298,0.8329,0.44259,0.51988,0.49907,0.51677,0.49033,0.49759,0.51237,0.49636,0.49417,0.49769,0.16259,0.16227,0.16246,0.16197,0.16036,0.16156,0.16305,0.16233,0.1618,0.16171,0.16312,0.16133,0.16274,0.16065,0.16193,0.1625,0.82416,0.83829,0.8213,0.83518,0.82889,0.83021,0.49528,0.5769,0.49473,0.49171,0.49466,0.51962,0.50238,0.50276,0.49263,0.50468,0.16145,0.16169,0.16187,0.16226,0.16108,0.16264,0.16184,0.16172,0.16188,0.16221,0.16205,0.16154,0.16217,0.16087,0.1624,0.16191,0.16114,0.8248,0.82825,0.82295,0.83914,0.82875,0.82629,0.52123,0.48824,0.54716,0.4873,0.51103,0.55981,0.49517,0.49205,0.49858,0.47374,0.51867,0.16135,0.16302,0.16127,0.16149,0.16161,0.16186,0.16189,0.16091,0.16277,0.16153,0.16188,0.16104,0.16109,0.13833,0.14173,0.13978,0.16095,0.8284,0.82973,0.82387,0.82592,0.82499,0.82841,0.84847,0.50423,0.53812,0.49714,0.4919,0.52313,0.4781,0.41723,0.49852,0.50288,0.48328,0.49512,0.16145,0.16225,0.16135,0.16172,0.16104,0.16212,0.16065,0.16109,0.16274,0.16116,0.16153,0.13799,0.13534,0.13548,0.1391,0.1371,0.13579,0.16307,0.82507,0.83313,0.82955,0.83061,0.83111,0.82202,0.82815,0.45807,0.49559,0.49432,0.49851,0.47096,0.52676,0.49365,0.54801,0.49723,0.49543,0.56395,0.16171,0.16194,0.16287,0.16254,0.16127,0.16145,0.16054,0.16143,0.16117,0.14024,0.13644,0.14151,0.13838,0.14069,0.1396,0.13928,0.13281,0.13842,0.16174,0.83109,0.81949,0.83114,0.8299,0.8298,0.82531,0.83008,0.52375,0.52828,0.51699,0.49021,0.45911,0.49468,0.50342,0.46173,0.49345,0.56405,0.4849,0.49714,0.16123,0.16153,0.16204,0.16179,0.1613,0.16129,0.13922,0.1389,0.13789,0.13881,0.14002,0.13913,0.13926,0.14346,0.13903,0.13852,0.13669,0.13837,0.8318,0.83278,0.82999,0.82729,0.83256,0.83107,0.83164,0.48839,0.47542,0.52648,0.49475,0.49586,0.50806,0.47321,0.54009,0.52736,0.51592,0.48208,0.46354,0.16025,0.16235,0.16247,0.13793,0.1416,0.13887,0.14485,0.13904,0.13965,0.1435,0.12913,0.13878,0.13887,0.14099,0.1376,0.13487,0.14088,0.1388,0.83104,0.83702,0.83528,0.82999,0.8385,0.83033,0.82843,0.83164,0.8268,0.49312,0.47231,0.43151,0.49616,0.50044,0.39418,0.49479,0.47998,0.48618,0.51407,0.50131,0.1393,0.14289,0.14262,0.13935,0.13867,0.13764,0.1374,0.13916,0.14869,0.1389,0.13772,0.13759,0.13912,0.13911,0.13936,0.14069,0.14525,0.14135,0.83139,0.82449,0.82492,0.82492,0.83603,0.8296,0.82684,0.84656,0.8363,0.52052,0.51517,0.36933,0.36998,0.38703,0.3876,0.37804,0.38679,0.3685,0.37899,0.42814,0.13473,0.13814,0.13895,0.13831,0.13873,0.13141,0.13857,0.14028,0.13607,0.13897,0.14178,0.13602,0.13995,0.13908,0.13916,0.13636,0.13684,0.1373,0.8252,0.8428,0.82453,0.82838,0.83483,0.8321,0.83159,0.82858,0.82301,0.46412,0.36724,0.41086,0.36396,0.36979,0.37529,0.36837,0.30645,0.34132,0.39462,0.36423,0.13855,0.1318,0.13959,0.139,0.13974,0.1395,0.13439,0.13813,0.14132,0.1388,0.13487,0.13881,0.14181,0.13921,0.14127,0.14192,0.13809,0.14229,0.83601,0.82622,0.83648,0.83958,0.82252,0.81614,0.8264,0.47534,0.52876,0.51538,0.38371,0.38758,0.36846,0.39795,0.40215,0.34949,0.37765,0.38693,0.34153,0.37943,0.13932,0.14361,0.1388,0.13609,0.13193,0.13414,0.13532,0.13892,0.1386,0.13895,0.13896,0.13832,0.13919,0.1

3946,0.13926,0.13705,0.13095,0.14082,0.82587,0.83249,0.82689,0.8304,0.82272,0.844,0.506,0.48674,0.45777,0.38411,0.43841,0.36714,0.35089,0.39273,0.30143,0.33703,0.34643,0.44729,0.38477,0.41416,0.13886,0.13776,0.13855,0.13799,0.13467,0.14073,0.13818,0.13173,0.13973,0.13744,0.14116,0.1346,0.13699,0.13947,0.13761,0.13904,0.13711,0.13404,0.82914,0.82806,0.83027,0.83587,0.83875,0.45038,0.46885,0.47071,0.45885,0.44728,0.46795,0.31753,0.30343,0.38573,0.33633,0.39416,0.36856,0.36996,0.36987,0.36954,0.13853,0.13623,0.14062,0.13855,0.13888,0.13924,0.14365,0.13984,0.13703,0.13901,0.13829,0.13665,0.13882,0.13809,0.1384,0.13885,0.14219,0.1406,0.83228,0.83867,0.83754,0.47456,0.46616,0.47203,0.47627,0.47896,0.47012,0.48454,0.40713,0.37042,0.35508,0.37154,0.32996,0.32186,0.37953,0.36852,0.29867,0.36816,0.14781,0.13976,0.13857,0.13846,0.1392,0.13831,0.13676,0.139,0.14289,0.13788,0.13998,0.13525,0.13889,0.13523,0.12981,0.13968,0.14155,0.13871,0.83089,0.4869,0.49297,0.45308,0.47068,0.52321,0.47692,0.5425,0.47258,0.45451,0.28342,0.36781,0.38249,0.35715,0.32707,0.37261,0.40011,0.3571,0.35472,0.14009,0.13908,0.13717,0.13542,0.1391,0.13903,0.13829,0.13563,0.13863,0.1403,0.13877,0.13872,0.13854,0.1364,0.13389,0.13983,0.139,0.11627,0.43086,0.46387,0.44408,0.34158,0.51059,0.34005,0.41599,0.49224,0.50309,0.47626,0.36814,0.37689,0.44075,0.30268,0.35634,0.43869,0.36121,0.37649,0.33879,0.14043,0.13944,0.13948,0.14039,0.13917,0.14331,0.13885,0.1346,0.13836,0.13314,0.13874,0.13824,0.14089,0.13798,0.13866,0.14046,0.1393,0.11638,0.5163,0.54155,0.48111,0.47013,0.38302,0.47212,0.4748,0.47515,0.47217,0.48173,0.44429,0.35875,0.37089,0.36791,0.36982,0.4043,0.36468,0.34802,0.13891,0.13637,0.13624,0.14396,0.13915,0.14302,0.13905,0.14107,0.13888,0.13861,0.13693,0.13876,0.13947,0.13457,0.13856,0.13814,0.13666,0.13766,0.11567,0.50606,0.48027,0.34324,0.43564,0.4959,0.45743,0.47919,0.47756,0.47481,0.46986,0.37373,0.31605,0.36586,0.36959,0.36119,0.34276,0.33999,0.40643,0.13635,0.13909,0.1468,0.13823,0.14156,0.13869,0.13937,0.13858,0.13594,0.14173,0.13871,0.13687,0.14077,0.13761,0.13893,0.13892,0.14615,0.11596,0.11533,0.11588,0.6212,0.45135,0.47162,0.46948,0.5487,0.49634,0.47336,0.47325,0.41371,0.36805,0.3112,0.32684,0.37949,0.37186,0.37084,0.13661,0.13849,0.13847,0.14301,0.13132,0.135,0.14149,0.1401,0.13385,0.13797,0.13946,0.13903,0.13548,0.14258,0.12256,0.13527,0.14296,0.14011,0.11613,0.11616,0.11607,0.11564,0.46825,0.52287,0.53591,0.44913,0.4772,0.40564,0.44987,0.43716,0.47174,0.2697,0.37331,0.32292,0.13599,0.13851,0.15295,0.13767,0.13671,0.13778,0.13765,0.13872,0.14419,0.13961,0.13901,0.14194,0.13685,0.13878,0.15048,0.1406,0.13853,0.14082,0.13914,0.1404,0.11503,0.11569,0.11599,0.1162,0.11607,0.11617,0.51692,0.53439,0.47116,0.46644,0.62235,0.40948,0.49179,0.47251,0.14438,0.13984,0.14151,0.14003,0.13985,0.1393,0.14522,0.13885,0.13802,0.13997,0.13913,0.14179,0.13944,0.13779,0.13486,0.13705,0.13608,0.13849,0.13878,0.13655,0.13882,0.13904,0.13617,0.11606,0.1163,0.11633,0.11608,0.11625,0.11624,0.48025,0.47348,0.51517,0.49148,0.4793,0.11588,0.11588,0.13802,0.13952,0.1345,0.13841,0.13877,0.13953,0.13939,0.13824,0.13899,0.14074,0.13921,0.14002,0.13886,0.14857,0.14632,0.13747,0.14019,0.13865,0.14043,0.13869,0.13873,0.11522,0.11602,0.11565,0.11631,0.11674,0.11535,0.11569,0.11616,0.11625,0.11568,0.46206,0.51546,0.11598,0.11592,0.11608,0.11589,0.1408,0.13363,0.14089,0.13724,0.13741,0.14301,0.13908,0.13912,0.13841,0.13918,0.13843,0.14114,0.13874,0.13929,0.14156,0.14002,0.13834,0.13977,0.13659,0.11536,0.11633,0.11622,0.11499,0.1157,0.11617,0.1161,0.11557,0.11604,0.11572,0.11607,0.11626,0.11627,0.11541,0.11637,0.11574,0.11579,0.1389,



0.13836,0.13907,0.13528,0.14067,0.13536,0.13742,0.13921,0.13899,0.1422  
1,0.13917,0.13889,0.14187,0.14134,0.14001,0.13827,0.11584,0.1159,0.115  
93,0.1163,0.1158,0.11611,0.11621,0.11599,0.11616,0.1163,0.11608,0.1156  
1,0.1162,0.1159,0.11588,0.11617,0.11558,0.11553,0.1157,0.13494,0.13919  
,0.14399,0.13946,0.13544,0.13882,0.14051,0.13978,0.13883,0.13918,0.140  
9,0.13872,0.14628,0.11565,0.11637,0.11644,0.11536,0.1157,0.11586,0.116  
32,0.11535,0.11596,0.11586,0.11561,0.11561,0.11634,0.1161,0.11626,0.11  
605,0.11575,0.11561,0.11572,0.11578,0.116,0.13889,0.13469,0.13803,0.13  
813,0.13784,0.12947,0.1388,0.13909,0.13822,0.11612,0.11595,0.11645,0.1  
1618,0.11569,0.11594,0.11553,0.1162,0.11668,0.11604,0.11578,0.11658,0.  
1159,0.11542,0.11674,0.11553,0.11631,0.11569,0.11557,0.11594,0.11643,0  
.11544,0.11595,0.11604,0.11599,0.13406,0.13993,0.14187,0.13255,0.11678  
,0.11537,0.11553,0.1161,0.11583,0.11623,0.11618,0.11539,0.11619,0.1162  
5,0.11535,0.11568,0.11485,0.11554,0.11605,0.11537,0.11659,0.11559,0.11  
519,0.11555,0.11606,0.11648,0.11566,0.11582,0.11543,0.11553,0.11554,0.  
11563,0.11651,0.11565,0.11587,0.11573,0.11601,0.11608,0.11599,0.11583,  
0.11628,0.11587,0.11567,0.11596,0.11644,0.11546,0.11621,0.11629,0.1154  
9,0.11614,0.11574,0.11589,0.11605,0.11579,0.11633,0.11649,0.11578,0.11  
565,0.11634,0.11586,0.11571,0.11605,0.11611,0.11581,0.11552,0.11602,0.  
11587,0.11593,0.11681,0.11539,0.11628,0.1166,0.1166,0.11578,0.11564,0.  
1162,0.11609,0.11605,0.11573,0.11553,0.11596,0.11561,0.11616,0.11544,0  
.11591,0.11619,0.11605,0.11549,0.11594,0.11566,0.11594,0.11599,0.11538  
,0.11655,0.11541,0.11655,0.11563,0.11576,0.11603,0.11656,0.11623,0.115  
81,0.11564,0.11643,0.11611,0.11587,0.11634,0.11586,0.11568,0.11616,0.1  
1581,0.1159,0.11636,0.11588,0.11582,0.11592,0.11606,0.11587,0.11529,0.  
11589,0.11556,0.11561,0.11545,0.11568,0.11552,0.11573,0.11627,0.11574,  
0.11587,0.11611,0.11613,0.11557,0.11621,0.1155,0.11626,0.11642,0.11592  
,0.11544,0.11511,0.11592,0.11631,0.11517,0.11618,0.11648,0.11605,0.115  
71,0.11587,0.11588,0.11623,0.1158,0.11519,0.11544,0.11593,0.11627,0.11  
589,0.11546,0.11573,0.11556,0.11554,0.11571,0.11569,0.11653,0.11596,0.  
1161,0.11556,0.11625,0.11601,0.11671,0.11612,0.11522,0.11638,0.11651,0  
.11573,0.11644,0.11572,0.11613,0.11581,0.11602,0.11586,0.11623,0.11508  
,0.11623,0.11589,0.1152,0.11603,0.11672,0.11595,0.11547,0.11607,0.1165  
4,0.11596,0.11557,0.11618,0.11515,0.11525,0.11617,0.11636,0.11576,0.11  
615

0.17337,0.17355,0.17302,0.17314,0.17306,0.17281,0.1739,0.17324,0.17281  
,0.17358,0.17391,0.17418,0.17364,0.17301,0.1736,0.17301,0.17397,0.1729  
7,0.17398,0.17416,0.42871,0.39542,0.41373,0.41028,0.17205,0.17395,0.17  
374,0.17324,0.1737,0.17295,0.17434,0.17365,0.17327,0.17354,0.1737,0.17  
375,0.17429,0.17248,0.17368,0.65386,0.40938,0.40835,0.41115,0.41981,0.  
32815,0.41519,0.17385,0.17341,0.17396,0.17336,0.17309,0.17161,0.17431,  
0.17331,0.17414,0.17297,0.17349,0.17338,0.17294,0.17367,0.17405,0.6487  
7,0.64453,0.35229,0.38881,0.41357,0.41593,0.40601,0.43559,0.43862,0.37  
64,0.17314,0.17414,0.17254,0.17438,0.1739,0.1741,0.17308,0.17282,0.173  
42,0.174,0.17461,0.17392,0.17303,0.17322,0.17307,0.64611,0.65114,0.645  
19,0.41363,0.43462,0.46184,0.38985,0.44611,0.36667,0.50872,0.41775,0.4  
1376,0.17312,0.17372,0.17321,0.1738,0.17331,0.17327,0.17329,0.17348,0.  
17338,0.17295,0.1732,0.1742,0.17343,0.17272,0.17275,0.17304,0.65993,0.  
65395,0.65322,0.6566,0.37468,0.42901,0.4156,0.42887,0.40994,0.41504,0.  
42499,0.41308,0.4127,0.41531,0.17432,0.17364,0.17406,0.17368,0.17152,0  
.17302,0.17467,0.17376,0.17374,0.17332,0.17452,0.17285,0.17413,0.17225  
,0.1735,0.17464,0.64692,0.6583,0.644,0.66068,0.65011,0.64849,0.41244,0

.47019,0.41178,0.40814,0.41276,0.42909,0.41804,0.42143,0.41025,0.42241  
,0.17331,0.17371,0.17338,0.174,0.17283,0.17416,0.17353,0.17348,0.17368  
,0.17365,0.17349,0.17352,0.17349,0.17217,0.17403,0.17357,0.17307,0.649  
96,0.65208,0.64446,0.65966,0.6497,0.6463,0.43127,0.40691,0.44872,0.404  
78,0.42612,0.45957,0.41189,0.41,0.41525,0.39526,0.42842,0.17292,0.1747  
2,0.17275,0.17309,0.17312,0.17376,0.17323,0.17252,0.17438,0.17341,0.17  
321,0.17277,0.17274,0.13436,0.13979,0.13655,0.17289,0.64921,0.65009,0.  
6443,0.6511,0.64661,0.65116,0.66831,0.41911,0.44333,0.41403,0.40797,0.  
43029,0.39989,0.35593,0.41543,0.41814,0.40158,0.41306,0.17348,0.17387,  
0.17341,0.17368,0.17289,0.17364,0.17252,0.17295,0.17432,0.17284,0.1733  
,0.13362,0.12893,0.12932,0.13517,0.13178,0.12956,0.17495,0.64903,0.652  
8,0.65252,0.65563,0.6501,0.64375,0.65133,0.38439,0.41413,0.41036,0.413  
31,0.39675,0.43438,0.40982,0.45001,0.41431,0.4121,0.46068,0.17357,0.17  
36,0.17468,0.17444,0.17299,0.17295,0.17229,0.17307,0.17235,0.1374,0.13  
037,0.13901,0.13435,0.13824,0.13615,0.1353,0.12438,0.13435,0.17325,0.6  
5575,0.6461,0.64925,0.65242,0.65436,0.6471,0.64746,0.4319,0.43494,0.42  
721,0.40607,0.38658,0.41069,0.41884,0.39063,0.40934,0.46155,0.40669,0.  
41568,0.17338,0.17283,0.17406,0.17366,0.17295,0.17316,0.13538,0.13477,  
0.1336,0.13474,0.13672,0.13506,0.13536,0.14235,0.13509,0.13442,0.1315,  
0.13353,0.65735,0.65418,0.65297,0.65295,0.65046,0.65211,0.6536,0.40683  
,0.3976,0.43525,0.41096,0.41234,0.41931,0.39775,0.44493,0.43503,0.4280  
4,0.40286,0.39155,0.17192,0.17396,0.17386,0.1333,0.14035,0.13473,0.145  
05,0.13502,0.13634,0.14262,0.11861,0.13463,0.13497,0.13848,0.13271,0.1  
2823,0.13839,0.13488,0.65217,0.6589,0.65579,0.65055,0.66131,0.65055,0.  
65185,0.65823,0.64495,0.41159,0.39452,0.3668,0.41286,0.41691,0.33965,0.  
.41241,0.39925,0.40725,0.42478,0.41768,0.1351,0.14162,0.14135,0.13526,  
0.13462,0.13311,0.13229,0.13514,0.15141,0.13498,0.13228,0.13304,0.1350  
8,0.13525,0.13537,0.1381,0.14562,0.13868,0.65468,0.64677,0.64937,0.648  
89,0.66008,0.64924,0.65343,0.66883,0.66044,0.43,0.42752,0.30692,0.3079  
1,0.31892,0.31993,0.31482,0.31919,0.30349,0.31657,0.35099,0.12813,0.13  
375,0.13499,0.13379,0.1348,0.12189,0.13431,0.13702,0.13013,0.13474,0.1  
4022,0.12974,0.13626,0.13502,0.13533,0.13039,0.13174,0.13198,0.65032,0.  
.66447,0.64884,0.64758,0.65686,0.65611,0.6565,0.65491,0.64811,0.36845,  
0.30469,0.34141,0.30356,0.30671,0.31038,0.30809,0.25944,0.28767,0.3278  
2,0.30623,0.1344,0.12303,0.13566,0.13475,0.13668,0.13531,0.12677,0.134  
,0.1386,0.13472,0.1279,0.13455,0.13991,0.13581,0.13866,0.13976,0.13324  
,0.14077,0.65826,0.64959,0.66467,0.66205,0.64953,0.63773,0.6511,0.3751  
3,0.42059,0.40683,0.31607,0.32312,0.30687,0.32934,0.33557,0.29367,0.31  
485,0.32252,0.28871,0.31588,0.1352,0.14325,0.1347,0.13002,0.12285,0.12  
658,0.12855,0.135,0.13456,0.13512,0.13512,0.13452,0.13527,0.13554,0.13  
542,0.13234,0.12117,0.13817,0.6518,0.65362,0.64975,0.64965,0.64431,0.6  
6692,0.39793,0.38392,0.36114,0.30341,0.34856,0.3064,0.29128,0.32655,0.  
25662,0.28083,0.28843,0.35957,0.32143,0.3415,0.13502,0.13323,0.13455,0.  
.13303,0.12783,0.13805,0.13292,0.12268,0.13607,0.13246,0.13918,0.12729  
,0.13159,0.13593,0.13265,0.13507,0.13232,0.12649,0.65212,0.65206,0.653  
84,0.6571,0.65706,0.35849,0.36887,0.37352,0.36429,0.35318,0.37058,0.26  
724,0.25909,0.32273,0.28211,0.32423,0.30622,0.30802,0.30618,0.309,0.13  
434,0.13098,0.13788,0.13459,0.13473,0.13599,0.14296,0.13629,0.13182,0.  
13522,0.13389,0.13107,0.13489,0.13339,0.13404,0.13449,0.14004,0.13788,  
0.64967,0.65885,0.66123,0.37617,0.36996,0.37127,0.37649,0.37958,0.3714  
7,0.38461,0.32356,0.30971,0.2979,0.3099,0.27146,0.27138,0.31669,0.3056  
6,0.25357,0.30653,0.15077,0.13641,0.13465,0.13441,0.13519,0.1345,0.131

65,0.13509,0.14181,0.13333,0.13704,0.1288,0.13492,0.12875,0.1196,0.135  
98,0.13859,0.13455,0.65543,0.38368,0.38915,0.35979,0.37235,0.41129,0.3  
7747,0.43003,0.37277,0.35828,0.24186,0.30599,0.31928,0.29767,0.27707,0  
.31069,0.32826,0.29778,0.29781,0.13715,0.13462,0.13192,0.12908,0.13495  
,0.13496,0.13372,0.12955,0.13439,0.13726,0.13462,0.13471,0.13424,0.130  
36,0.12659,0.13658,0.13519,0.096478,0.34308,0.36703,0.35128,0.27254,0.  
40601,0.26942,0.33123,0.38888,0.39797,0.37582,0.30604,0.3177,0.36007,0  
.25613,0.29781,0.36209,0.30103,0.31125,0.28644,0.13736,0.13592,0.13564  
,0.13734,0.13564,0.14241,0.13519,0.12744,0.13415,0.12527,0.13468,0.134  
29,0.13847,0.13312,0.13492,0.13708,0.13521,0.096545,0.40894,0.42753,0.  
38156,0.3727,0.30352,0.37063,0.37592,0.37714,0.37384,0.38453,0.36493,0  
.29845,0.3083,0.30489,0.3071,0.33288,0.3049,0.2922,0.13449,0.13087,0.1  
3049,0.14301,0.13553,0.14204,0.13503,0.13886,0.13514,0.13448,0.13156,0  
.13451,0.13594,0.1277,0.13448,0.13404,0.13122,0.13242,0.095973,0.39832  
,0.37922,0.27292,0.34551,0.39362,0.36151,0.37904,0.3796,0.37613,0.3702  
4,0.30903,0.2643,0.30505,0.30844,0.30398,0.2858,0.28501,0.33682,0.1308  
2,0.13501,0.14818,0.1339,0.13963,0.13478,0.13592,0.13455,0.12949,0.139  
7,0.13438,0.13095,0.13751,0.13339,0.13494,0.13486,0.14684,0.096286,0.0  
95557,0.096288,0.49063,0.35758,0.37475,0.37074,0.43146,0.39452,0.3756,  
0.37664,0.32809,0.3068,0.2645,0.27581,0.31773,0.3093,0.30865,0.13086,0  
.13479,0.13441,0.14237,0.12205,0.12825,0.13929,0.13697,0.12652,0.13332  
,0.13578,0.13576,0.12912,0.14107,0.1076,0.12873,0.14199,0.13694,0.0963  
6,0.096195,0.096376,0.09592,0.37138,0.41396,0.42387,0.35473,0.37782,0.  
32396,0.35642,0.34629,0.3746,0.23338,0.3122,0.27364,0.13015,0.1343,0.1  
593,0.1327,0.13109,0.13315,0.13271,0.13448,0.14357,0.1358,0.13528,0.14  
037,0.1317,0.13489,0.15431,0.13769,0.13446,0.13769,0.13494,0.13738,0.0  
95562,0.09617,0.095988,0.096244,0.096118,0.096541,0.40727,0.42193,0.37  
211,0.36776,0.49559,0.3247,0.3899,0.37309,0.14394,0.13594,0.13978,0.13  
666,0.13597,0.13597,0.14548,0.13493,0.13379,0.13669,0.13493,0.13991,0.  
1359,0.13282,0.12851,0.13175,0.12996,0.13441,0.13482,0.13113,0.13481,0  
.13508,0.13011,0.095979,0.096863,0.096528,0.096361,0.096399,0.09656,0.  
38034,0.37274,0.4063,0.38977,0.37618,0.096121,0.096201,0.13336,0.13617  
,0.12758,0.13427,0.13479,0.13548,0.13519,0.13411,0.13504,0.13754,0.135  
3,0.13664,0.13497,0.15105,0.14732,0.13221,0.137,0.13448,0.13727,0.1346  
5,0.13458,0.095474,0.096304,0.096154,0.096829,0.096905,0.09577,0.09583  
2,0.096234,0.096638,0.095918,0.36807,0.40704,0.09636,0.096179,0.096024  
,0.096243,0.1381,0.12613,0.13826,0.13191,0.13184,0.14176,0.1349,0.1351  
6,0.13436,0.13492,0.13422,0.13883,0.13465,0.13522,0.1392,0.13643,0.134  
03,0.13644,0.13105,0.09586,0.096392,0.096525,0.095573,0.096051,0.09645  
3,0.096666,0.095877,0.096167,0.095727,0.096057,0.096518,0.096739,0.095  
576,0.09638,0.095899,0.096276,0.13494,0.13399,0.13484,0.12872,0.13788,  
0.1286,0.13232,0.13508,0.13548,0.14055,0.13577,0.1345,0.14005,0.13859,  
0.13689,0.13349,0.095885,0.096179,0.096033,0.096676,0.095862,0.096191,  
0.096774,0.096297,0.096299,0.096615,0.096217,0.095744,0.096531,0.09607  
5,0.096162,0.096127,0.095825,0.095809,0.096089,0.12825,0.13547,0.14335  
,0.13538,0.12916,0.1349,0.13742,0.13638,0.13478,0.13548,0.13823,0.1348  
2,0.14689,0.096111,0.096711,0.096553,0.0956,0.095925,0.096049,0.096316  
,0.0956,0.096271,0.096053,0.095803,0.096049,0.096751,0.096223,0.096775  
,0.096352,0.096076,0.095826,0.096266,0.096319,0.096047,0.13478,0.12774  
,0.13343,0.13355,0.13347,0.11919,0.13464,0.13516,0.13383,0.096414,0.09  
6437,0.096553,0.096427,0.096177,0.096015,0.095916,0.096175,0.097005,0.  
096204,0.095936,0.096593,0.096388,0.095766,0.096753,0.095779,0.096594,

0.096131,0.095649,0.096045,0.096684,0.095583,0.096158,0.09627,0.096295  
,0.12695,0.13648,0.13949,0.12377,0.096924,0.095622,0.095793,0.096563,0  
.096063,0.096834,0.096622,0.095297,0.096315,0.096338,0.095703,0.095907  
,0.095218,0.095944,0.096242,0.095959,0.096526,0.095609,0.095393,0.0957  
17,0.096241,0.096619,0.096092,0.096162,0.096092,0.095615,0.095654,0.09  
603,0.096842,0.096197,0.095988,0.09599,0.096356,0.096559,0.096218,0.09  
6374,0.096597,0.095828,0.096012,0.096316,0.097022,0.095914,0.096748,0.  
096387,0.095778,0.096491,0.096139,0.096081,0.096513,0.096121,0.096259,  
0.096642,0.095738,0.096126,0.096612,0.096124,0.096,0.096046,0.096144,0  
.095867,0.095928,0.096291,0.096186,0.096473,0.097106,0.095743,0.096488  
,0.096692,0.096917,0.095872,0.095691,0.0962,0.096203,0.096236,0.095712  
,0.095544,0.096164,0.096106,0.096153,0.095613,0.095986,0.096414,0.0961  
46,0.096063,0.096123,0.096141,0.096195,0.096723,0.095408,0.097005,0.09  
5642,0.096802,0.096033,0.096074,0.09614,0.096781,0.096115,0.096015,0.0  
95902,0.096712,0.096324,0.096096,0.096443,0.096095,0.095928,0.096304,0  
.096192,0.095845,0.096631,0.096172,0.095923,0.096378,0.096507,0.096076  
,0.095783,0.096042,0.095765,0.095656,0.095785,0.096154,0.095841,0.0958  
84,0.096773,0.095993,0.096161,0.096376,0.096602,0.095507,0.096455,0.09  
6027,0.096267,0.09677,0.096553,0.095927,0.095406,0.096248,0.096577,0.0  
95648,0.096621,0.096391,0.096245,0.09568,0.095766,0.096251,0.096765,0.  
096068,0.095811,0.09574,0.096276,0.096178,0.095996,0.095872,0.095999,0  
.095955,0.09587,0.096002,0.096096,0.096801,0.096222,0.096411,0.096147,  
0.096864,0.096297,0.097019,0.095863,0.095583,0.096852,0.096999,0.09606  
9,0.096428,0.095717,0.096333,0.095891,0.096238,0.096488,0.096572,0.095  
489,0.096732,0.096375,0.095542,0.096434,0.096933,0.096464,0.095606,0.0  
95983,0.096944,0.096227,0.095941,0.096439,0.095508,0.095439,0.096356,0  
.096597,0.09625,0.09615  
0.18109,0.18128,0.18119,0.18037,0.18123,0.18044,0.18187,0.18107,0.1803  
4,0.1816,0.18148,0.18201,0.1815,0.18122,0.18132,0.18105,0.1812,0.18158  
,0.18187,0.18186,0.37495,0.3482,0.36177,0.3611,0.17989,0.1819,0.18163,  
0.1811,0.18137,0.18096,0.182,0.18138,0.18103,0.1813,0.18154,0.18142,0.  
18209,0.18036,0.18136,0.54485,0.35935,0.35992,0.36057,0.36587,0.29857,  
0.36473,0.18167,0.18204,0.18198,0.18106,0.18108,0.17966,0.18209,0.1814  
5,0.18132,0.18114,0.18071,0.18086,0.18083,0.1817,0.18206,0.53916,0.534  
77,0.31469,0.34536,0.36146,0.36334,0.35639,0.38045,0.37992,0.33463,0.1  
8124,0.1821,0.18017,0.18229,0.18202,0.18184,0.18124,0.18116,0.18109,0.  
18155,0.18201,0.18174,0.1813,0.18126,0.18132,0.54009,0.54315,0.53416,0  
.36102,0.3777,0.39826,0.3435,0.38881,0.32793,0.43572,0.36696,0.36264,0  
.18091,0.18164,0.18089,0.18202,0.18125,0.18113,0.18093,0.18169,0.18104  
,0.18084,0.18168,0.18223,0.18108,0.18107,0.18083,0.18059,0.54934,0.550  
48,0.54713,0.54555,0.33442,0.37399,0.3657,0.37494,0.36176,0.36355,0.36  
964,0.36334,0.36217,0.36397,0.1823,0.18133,0.18155,0.18141,0.17966,0.1  
8097,0.18234,0.18139,0.1814,0.18097,0.18233,0.18087,0.18205,0.18053,0.  
18142,0.18224,0.54289,0.55071,0.538,0.54879,0.54561,0.53864,0.36254,0.  
40617,0.36263,0.35857,0.36354,0.37459,0.3682,0.37158,0.36243,0.371,0.1  
8146,0.18198,0.18143,0.18189,0.18044,0.18172,0.18161,0.18179,0.18131,0  
.18148,0.18145,0.18162,0.1813,0.18005,0.18202,0.18147,0.18081,0.54134,  
0.54965,0.53603,0.54489,0.54036,0.53482,0.37482,0.35591,0.39148,0.3566  
5,0.37536,0.39677,0.36273,0.36143,0.36541,0.34842,0.37438,0.18085,0.18  
27,0.18071,0.18084,0.18091,0.18142,0.18077,0.18054,0.18215,0.18121,0.1  
8165,0.18037,0.18086,0.13026,0.1374,0.13289,0.18045,0.54149,0.54598,0.  
53333,0.54041,0.53954,0.54196,0.5625,0.36816,0.38678,0.3631,0.35947,0.

37256,0.35238,0.31842,0.36487,0.36632,0.35382,0.36142,0.18132,0.18177,  
0.1811,0.18137,0.18076,0.18162,0.18046,0.1808,0.18228,0.18094,0.18118,  
0.12929,0.1229,0.12347,0.13108,0.12656,0.12365,0.18281,0.54003,0.55002  
,0.54732,0.54407,0.54364,0.53562,0.54182,0.34028,0.36272,0.36009,0.363  
1,0.35158,0.37804,0.36209,0.39016,0.36326,0.36064,0.3977,0.18181,0.181  
66,0.18214,0.18244,0.18082,0.18104,0.1807,0.18082,0.18011,0.1339,0.124  
71,0.13621,0.13017,0.13514,0.13247,0.13119,0.11676,0.13019,0.18122,0.5  
4665,0.5418,0.53903,0.54406,0.54523,0.53682,0.54033,0.37811,0.38035,0.  
37365,0.35684,0.34527,0.36082,0.36891,0.34466,0.35819,0.40028,0.35841,  
0.3649,0.18092,0.18062,0.1819,0.18158,0.18084,0.18121,0.13111,0.1306,0  
.12941,0.13068,0.13322,0.13074,0.13161,0.14047,0.13081,0.13019,0.12625  
,0.12904,0.55119,0.55129,0.54621,0.54737,0.54273,0.54408,0.54428,0.357  
88,0.35146,0.37968,0.36242,0.36373,0.36784,0.35103,0.38807,0.37892,0.3  
7504,0.3577,0.34646,0.18009,0.18187,0.1824,0.1285,0.13805,0.13045,0.14  
419,0.13069,0.13248,0.14082,0.10956,0.13074,0.13109,0.13555,0.12786,0.  
12193,0.13522,0.13069,0.54096,0.5482,0.54858,0.54261,0.55167,0.54278,0  
.55,0.54641,0.53821,0.36135,0.34977,0.32751,0.36479,0.36673,0.30626,0.  
362,0.35253,0.35993,0.36977,0.36752,0.13102,0.13957,0.13913,0.13123,0.  
13045,0.12849,0.12734,0.13104,0.1522,0.131,0.12663,0.12827,0.13119,0.1  
3087,0.13102,0.13476,0.14488,0.13566,0.54558,0.53724,0.54359,0.53713,0  
.54749,0.54146,0.54229,0.56068,0.55129,0.37776,0.37288,0.2687,0.26921,  
0.27585,0.27704,0.27647,0.27487,0.26448,0.27611,0.30333,0.12179,0.1293  
4,0.13069,0.12933,0.13042,0.11342,0.12976,0.13335,0.12461,0.13042,0.13  
794,0.12392,0.13237,0.13075,0.13122,0.12485,0.12673,0.12685,0.54253,0.  
55882,0.53798,0.53503,0.54914,0.5529,0.54441,0.54437,0.54212,0.30659,0  
.2669,0.2981,0.26543,0.26583,0.27023,0.26916,0.22965,0.25166,0.28723,0  
.26876,0.13037,0.11498,0.13145,0.13048,0.13296,0.13091,0.11989,0.12963  
,0.13548,0.13038,0.12168,0.13036,0.13711,0.13194,0.13536,0.13698,0.128  
4,0.13881,0.55162,0.5412,0.55318,0.55346,0.53695,0.52798,0.54016,0.311  
59,0.35395,0.34065,0.27283,0.28365,0.2683,0.2865,0.29198,0.25944,0.274  
46,0.28135,0.25353,0.27486,0.13099,0.14202,0.13047,0.12414,0.11512,0.1  
1971,0.12229,0.13099,0.13038,0.13096,0.1312,0.13045,0.13094,0.13128,0.  
13123,0.12768,0.11248,0.13499,0.54308,0.54732,0.54014,0.54148,0.53707,  
0.56168,0.32959,0.32238,0.29956,0.25282,0.29103,0.26719,0.25258,0.2848  
1,0.22745,0.24574,0.25371,0.30702,0.28106,0.29557,0.13096,0.12817,0.13  
042,0.12804,0.12148,0.1348,0.1278,0.11459,0.13228,0.12751,0.13635,0.12  
053,0.12623,0.13203,0.12758,0.13093,0.12744,0.11963,0.54489,0.54266,0.  
54711,0.54958,0.54912,0.29901,0.30492,0.30993,0.30253,0.29349,0.30889,  
0.23535,0.23069,0.28527,0.24802,0.2803,0.2683,0.2696,0.26621,0.26854,0  
.13008,0.12528,0.1347,0.1302,0.13063,0.13244,0.14127,0.13228,0.12684,0  
.13093,0.12937,0.12549,0.13068,0.12885,0.1294,0.13052,0.13725,0.13455,  
0.54639,0.55042,0.54842,0.31565,0.30963,0.30806,0.31264,0.3154,0.30948  
,0.32283,0.26987,0.27127,0.26145,0.27143,0.23624,0.24009,0.27663,0.267  
03,0.2247,0.26725,0.15185,0.13279,0.13043,0.1303,0.13102,0.1304,0.1265  
8,0.13092,0.1399,0.12882,0.13365,0.12266,0.13059,0.12254,0.11086,0.132  
22,0.13535,0.13033,0.55137,0.31832,0.32444,0.30164,0.30996,0.34315,0.3  
1425,0.35881,0.31311,0.29814,0.2148,0.26906,0.27924,0.26087,0.24483,0.  
2719,0.28182,0.25909,0.26055,0.13352,0.13015,0.12683,0.1233,0.13046,0.  
13069,0.12885,0.12363,0.12998,0.13356,0.13042,0.13045,0.13028,0.12477,  
0.11969,0.13281,0.13126,0.079909,0.28724,0.30436,0.2928,0.22661,0.3399  
2,0.22384,0.27532,0.3237,0.33089,0.31379,0.2692,0.28037,0.30782,0.2267  
4,0.26119,0.31511,0.26381,0.27196,0.25309,0.13421,0.13181,0.13189,0.13

426,0.13196,0.14071,0.13128,0.12101,0.12995,0.11822,0.13037,0.13021,0.13569,0.1283,0.1308,0.13344,0.13084,0.080264,0.34036,0.35908,0.32054,0.3107,0.25188,0.3095,0.31284,0.31358,0.31228,0.31808,0.31572,0.26092,0.26741,0.26583,0.26707,0.28748,0.26667,0.25519,0.13042,0.12563,0.12505,0.14128,0.13166,0.14014,0.1307,0.13601,0.13131,0.13018,0.12629,0.13019,0.13215,0.12135,0.13005,0.12964,0.12584,0.12745,0.079645,0.33263,0.31696,0.22641,0.28939,0.32744,0.30083,0.31663,0.31744,0.31275,0.30864,0.26893,0.23087,0.26759,0.26885,0.26777,0.24971,0.25056,0.2919,0.12549,0.13069,0.14808,0.12995,0.13682,0.13077,0.13193,0.13012,0.12366,0.13685,0.13016,0.12524,0.13406,0.12876,0.1305,0.13079,0.14632,0.080113,0.079653,0.079902,0.40934,0.29939,0.31332,0.31079,0.35994,0.32927,0.31444,0.31438,0.27511,0.2681,0.23526,0.24347,0.27842,0.2693,0.26934,0.12533,0.13062,0.13023,0.14054,0.11381,0.1219,0.13647,0.13329,0.11985,0.12855,0.13193,0.13193,0.12315,0.13883,0.095447,0.12243,0.14018,0.1331,0.079992,0.079959,0.079975,0.079245,0.30839,0.34378,0.35293,0.29638,0.31293,0.27065,0.29747,0.28881,0.31348,0.20939,0.27138,0.24246,0.12473,0.13015,0.16307,0.12786,0.12573,0.12852,0.12781,0.13004,0.14212,0.13179,0.13103,0.13809,0.12678,0.13066,0.15612,0.13438,0.13009,0.13429,0.1306,0.13394,0.079699,0.080085,0.079824,0.079795,0.080019,0.0803,0.33935,0.35048,0.30996,0.30773,0.41024,0.26802,0.32553,0.31169,0.14279,0.13202,0.13723,0.13283,0.13224,0.13228,0.14417,0.13087,0.12928,0.13311,0.13079,0.1372,0.13177,0.12801,0.12256,0.12661,0.12407,0.13006,0.13037,0.12584,0.13039,0.13073,0.12443,0.079892,0.08051,0.080284,0.080073,0.080363,0.080039,0.31429,0.3119,0.33936,0.32453,0.31207,0.07967,0.079985,0.12844,0.13232,0.1209,0.12999,0.1306,0.13129,0.13104,0.12984,0.13091,0.13423,0.13117,0.13281,0.13068,0.15163,0.14678,0.12733,0.13345,0.13012,0.13348,0.13047,0.13055,0.079492,0.079717,0.080079,0.08042,0.080724,0.079249,0.079655,0.080296,0.080146,0.079843,0.30693,0.33739,0.080014,0.079846,0.079828,0.080004,0.13484,0.1191,0.13526,0.12679,0.12677,0.14,0.13089,0.13087,0.13021,0.13066,0.1297,0.13581,0.13055,0.13107,0.13644,0.13282,0.1298,0.13275,0.12568,0.079231,0.080487,0.079729,0.07949,0.079941,0.080244,0.08059,0.079676,0.079857,0.079559,0.079798,0.08045,0.080233,0.079157,0.080147,0.079465,0.079949,0.13082,0.12983,0.13053,0.12274,0.13434,0.12263,0.12724,0.13105,0.13176,0.13806,0.13186,0.13028,0.13764,0.13578,0.1333,0.12871,0.079508,0.079894,0.079719,0.080199,0.079773,0.079864,0.080202,0.079973,0.080041,0.080305,0.080011,0.079596,0.08015,0.079778,0.080015,0.079779,0.079642,0.079393,0.080047,0.12183,0.13143,0.14185,0.13124,0.12283,0.1306,0.1339,0.13247,0.13083,0.13126,0.13543,0.13068,0.1462,0.079925,0.08051,0.080341,0.07936,0.079636,0.080051,0.079996,0.079028,0.079573,0.079739,0.079653,0.07967,0.080408,0.080245,0.080454,0.080002,0.079833,0.079612,0.079893,0.0802,0.08023,0.13057,0.12133,0.12886,0.12887,0.12876,0.11011,0.13072,0.13113,0.12922,0.080433,0.080385,0.080457,0.080329,0.079879,0.079365,0.079775,0.079676,0.080705,0.08016,0.07991,0.080327,0.079824,0.079848,0.080486,0.079402,0.0804,0.080088,0.079376,0.079781,0.080515,0.079335,0.079987,0.079925,0.079998,0.12046,0.13273,0.13681,0.11614,0.08069,0.079445,0.079632,0.080508,0.079932,0.080834,0.080411,0.07886,0.079851,0.079764,0.079416,0.080108,0.079121,0.079678,0.080219,0.079982,0.080193,0.079175,0.078956,0.079498,0.079819,0.080085,0.079659,0.080012,0.08002,0.079508,0.079624,0.079942,0.080429,0.080131,0.079587,0.079793,0.079896,0.080197,0.080051,0.080212,0.080075,0.079607,0.079849,0.079832,0.080344,0.079655,0.080317,0.079872,0.079833,0.080205,0.079831,0.080117,0.080243,0.079689,0.079991,0

.080169,0.079516,0.079602,0.079949,0.079744,0.079711,0.079947,0.07994,  
0.079539,0.079987,0.079973,0.079789,0.080274,0.080832,0.079539,0.08044  
1,0.080262,0.080614,0.079689,0.07956,0.079859,0.079983,0.080181,0.0793  
92,0.079747,0.080139,0.080075,0.079993,0.079354,0.079909,0.080316,0.08  
0203,0.080253,0.080029,0.080028,0.079817,0.080538,0.079311,0.080614,0.  
079358,0.080579,0.079946,0.079994,0.079872,0.080769,0.0797,0.079855,0.  
079787,0.080087,0.079963,0.079804,0.08036,0.079947,0.079828,0.08017,0.  
079943,0.079574,0.080593,0.079526,0.079905,0.080033,0.079955,0.079712,  
0.079578,0.080069,0.079582,0.079502,0.079497,0.080035,0.079681,0.07983  
2,0.080564,0.079718,0.079771,0.080118,0.080454,0.079206,0.079963,0.079  
76,0.080078,0.080403,0.080391,0.079651,0.079238,0.079793,0.080279,0.07  
9538,0.080336,0.079974,0.079827,0.079442,0.079467,0.079906,0.080456,0.  
079881,0.079407,0.079403,0.080138,0.079924,0.079589,0.079875,0.079869,  
0.079828,0.079652,0.079842,0.080131,0.080179,0.079958,0.080199,0.08011  
2,0.080647,0.080116,0.080843,0.079746,0.079141,0.080222,0.080816,0.079  
851,0.08009,0.079442,0.079885,0.079476,0.079838,0.080612,0.080345,0.07  
911,0.080325,0.079922,0.079324,0.079995,0.080592,0.08007,0.0794,0.0798  
91,0.080761,0.080026,0.079921,0.080194,0.079249,0.079332,0.080061,0.08  
0394,0.080084,0.079965  
0.18673,0.18667,0.18696,0.18581,0.1866,0.1859,0.18736,0.18669,0.18551,  
0.18666,0.18716,0.18701,0.18695,0.1864,0.18634,0.18669,0.18657,0.18677  
,0.18752,0.18712,0.34113,0.31785,0.33169,0.3301,0.1852,0.18702,0.18749  
,0.18652,0.18661,0.18679,0.18709,0.18652,0.18622,0.18687,0.1871,0.1868  
1,0.18774,0.18594,0.18704,0.47407,0.32897,0.32974,0.3304,0.33533,0.280  
49,0.33378,0.18728,0.18768,0.18746,0.18613,0.18645,0.18509,0.18788,0.1  
8698,0.18661,0.18677,0.18632,0.186,0.18628,0.1874,0.18753,0.47446,0.47  
171,0.29394,0.3192,0.33258,0.33101,0.32688,0.34631,0.34589,0.30914,0.1  
8701,0.18743,0.18596,0.18763,0.1876,0.18704,0.1868,0.18673,0.18707,0.1  
8726,0.18752,0.18712,0.18662,0.18648,0.18673,0.47456,0.48085,0.46901,0  
.33032,0.3438,0.35685,0.31534,0.35493,0.303,0.39393,0.33528,0.33274,0.  
18637,0.18689,0.18642,0.18768,0.18624,0.18648,0.1862,0.18742,0.18663,0  
.18619,0.18718,0.18768,0.18635,0.18673,0.18685,0.18615,0.48325,0.48646  
,0.47842,0.47942,0.31011,0.33983,0.33387,0.34067,0.33169,0.33352,0.339  
44,0.33022,0.33073,0.33368,0.18772,0.18666,0.18704,0.18705,0.18575,0.1  
8685,0.18768,0.18712,0.18682,0.18646,0.18755,0.18613,0.18761,0.18623,0  
.18657,0.18753,0.46976,0.4825,0.47413,0.47545,0.48002,0.47054,0.33081,  
0.36625,0.33347,0.3291,0.33412,0.34083,0.33692,0.34219,0.33283,0.33965  
,0.18711,0.18699,0.18648,0.18751,0.18604,0.18763,0.18694,0.18726,0.186  
51,0.18665,0.18705,0.18758,0.18707,0.18574,0.18718,0.18703,0.18633,0.4  
757,0.48424,0.47264,0.47777,0.47989,0.46702,0.34333,0.3267,0.35405,0.3  
2854,0.3424,0.35832,0.33121,0.33086,0.33527,0.31916,0.3423,0.18658,0.1  
8809,0.18634,0.18651,0.18613,0.18677,0.18613,0.18594,0.1876,0.18663,0.  
18674,0.18597,0.18658,0.12679,0.1351,0.12998,0.18566,0.47616,0.47969,0  
.46544,0.46962,0.46989,0.47448,0.49101,0.33457,0.35187,0.33252,0.32999  
,0.3396,0.32162,0.29574,0.33297,0.33474,0.3264,0.33102,0.1871,0.18693,  
0.18693,0.18683,0.18638,0.18684,0.18626,0.18668,0.18787,0.18609,0.1860  
9,0.12575,0.11825,0.11881,0.12763,0.12235,0.11893,0.18803,0.47255,0.48  
466,0.4853,0.47792,0.47571,0.47314,0.47914,0.31342,0.3335,0.33012,0.33  
232,0.32256,0.34433,0.3301,0.35311,0.3315,0.33097,0.35997,0.1871,0.187  
03,0.18809,0.18768,0.18602,0.18694,0.18637,0.18659,0.18619,0.13119,0.1  
2035,0.13401,0.12653,0.13296,0.12941,0.12788,0.11083,0.12683,0.18672,0  
.47935,0.4784,0.47043,0.4808,0.47838,0.47008,0.47594,0.34526,0.34693,0

.34264,0.32819,0.31882,0.33329,0.33646,0.31837,0.32818,0.36166,0.32832,0.33541,0.18653,0.18643,0.18705,0.18711,0.18618,0.1867,0.12793,0.127,0.12585,0.12741,0.13019,0.12736,0.12831,0.13872,0.12744,0.12694,0.12213,0.12543,0.48307,0.48078,0.47846,0.48035,0.47744,0.47438,0.47625,0.32794,0.32343,0.34508,0.33343,0.33622,0.33525,0.32372,0.35263,0.34546,0.3425,0.32973,0.31913,0.1857,0.18714,0.18791,0.12467,0.13611,0.12701,0.14306,0.12738,0.1294,0.13929,0.10237,0.12732,0.12774,0.13308,0.12408,0.11694,0.13264,0.12729,0.47695,0.48338,0.47526,0.47547,0.48354,0.48086,0.47859,0.48006,0.47039,0.33153,0.32277,0.30417,0.33375,0.33634,0.28636,0.33046,0.32433,0.33055,0.3392,0.33614,0.12756,0.13778,0.13705,0.12779,0.12706,0.12461,0.12355,0.12756,0.15245,0.1275,0.1224,0.12449,0.12793,0.12744,0.12737,0.13204,0.14412,0.13302,0.47663,0.47214,0.48032,0.47027,0.48097,0.47464,0.47317,0.4946,0.48441,0.34656,0.33936,0.24317,0.24548,0.24876,0.24977,0.25089,0.24774,0.24011,0.25233,0.27372,0.11712,0.12584,0.12736,0.12558,0.12714,0.10683,0.12603,0.13064,0.12019,0.1269,0.13579,0.11914,0.12927,0.12727,0.12802,0.12047,0.12274,0.1228,0.47373,0.49283,0.47323,0.47022,0.48382,0.48502,0.47878,0.48058,0.47852,0.26695,0.2413,0.27157,0.24181,0.24166,0.2464,0.24412,0.20997,0.2314,0.26201,0.24433,0.12711,0.10883,0.12816,0.12724,0.12995,0.12758,0.1147,0.12613,0.13292,0.1267,0.11673,0.1269,0.13498,0.12885,0.13272,0.13453,0.12455,0.13656,0.4811,0.47455,0.48458,0.48623,0.47131,0.46439,0.47336,0.27228,0.31094,0.29812,0.24698,0.25814,0.24356,0.2607,0.26458,0.23832,0.24982,0.25562,0.23162,0.24984,0.12785,0.14058,0.127,0.11956,0.10926,0.11434,0.1174,0.1275,0.12714,0.12762,0.12804,0.12703,0.12748,0.12778,0.12782,0.12385,0.10578,0.13223,0.47465,0.47578,0.4789,0.47908,0.46734,0.48945,0.28961,0.2805,0.26274,0.22148,0.2542,0.24518,0.2276,0.2607,0.20881,0.22409,0.23119,0.27299,0.25588,0.26768,0.12778,0.12412,0.12668,0.12433,0.11642,0.132,0.12392,0.10851,0.12926,0.12351,0.1339,0.11539,0.12206,0.12902,0.12347,0.1274,0.12388,0.11414,0.47894,0.47705,0.48345,0.48186,0.48153,0.25883,0.26896,0.27037,0.26406,0.2557,0.27006,0.21475,0.21256,0.26167,0.226,0.25306,0.24494,0.24316,0.24137,0.24608,0.12651,0.12131,0.13214,0.12681,0.12723,0.12952,0.13965,0.12922,0.12269,0.1275,0.12546,0.12101,0.12735,0.12496,0.12572,0.12716,0.13502,0.13161,0.47875,0.48525,0.47934,0.27637,0.27136,0.26988,0.27415,0.27703,0.26726,0.2815,0.23614,0.24572,0.23726,0.24608,0.21211,0.21959,0.25146,0.242,0.206,0.2426,0.15234,0.12973,0.1271,0.12703,0.1273,0.12722,0.12262,0.12739,0.13827,0.12516,0.1307,0.11821,0.12707,0.11769,0.10409,0.12914,0.13263,0.12668,0.48376,0.27847,0.28451,0.26359,0.27284,0.29816,0.27248,0.31074,0.27307,0.26121,0.19761,0.24513,0.25314,0.23746,0.22376,0.24728,0.25361,0.23408,0.23677,0.13039,0.12662,0.12299,0.11877,0.127,0.12729,0.12509,0.11924,0.12655,0.13077,0.12685,0.12711,0.12701,0.12026,0.11454,0.13003,0.128,0.067486,0.25009,0.26546,0.25387,0.19695,0.29731,0.19588,0.24094,0.28386,0.28883,0.2742,0.24468,0.25813,0.27596,0.20797,0.2379,0.28623,0.24141,0.24677,0.23282,0.13165,0.1285,0.12829,0.13148,0.12873,0.13881,0.12812,0.11606,0.12658,0.11261,0.12704,0.12723,0.13329,0.12429,0.12743,0.13024,0.12719,0.067877,0.29607,0.3152,0.28039,0.26949,0.21766,0.27054,0.27605,0.27336,0.27248,0.27688,0.28429,0.23644,0.24233,0.24121,0.24341,0.26005,0.24195,0.23237,0.12728,0.12152,0.12041,0.1398,0.1286,0.13871,0.12732,0.13345,0.12796,0.12689,0.12217,0.127,0.12895,0.11621,0.12662,0.12619,0.12169,0.12354,0.067156,0.28785,0.27715,0.19501,0.25192,0.28691,0.26129,0.27726,0.27556,0.27205,0.26901,0.24183,0.21035,0.24294,0.24406,0.24545,0.22715,0.22901,0.26421,0.12128,0.1272,0



.14783,0.12663,0.13463,0.12732,0.12874,0.12691,0.11909,0.13439,0.12723,0.12091,0.13116,0.12497,0.12704,0.1275,0.14583,0.067927,0.067421,0.067595,0.35609,0.26184,0.27277,0.27012,0.31361,0.28637,0.27545,0.27638,0.24087,0.24294,0.21641,0.22338,0.25371,0.24509,0.24593,0.12081,0.12715,0.12698,0.13909,0.10756,0.11707,0.13408,0.13044,0.11456,0.12506,0.12856,0.12877,0.11837,0.13677,0.085932,0.1176,0.13821,0.13011,0.067667,0.067792,0.06805,0.067249,0.26832,0.30454,0.30907,0.25892,0.27451,0.23523,0.26092,0.25083,0.27363,0.19412,0.24644,0.22233,0.12059,0.12673,0.16518,0.12371,0.12131,0.12501,0.12393,0.12659,0.14052,0.1287,0.12754,0.13602,0.12262,0.12738,0.15706,0.13169,0.12684,0.13131,0.12721,0.13088,0.067573,0.067808,0.067694,0.067506,0.068023,0.06826,0.29961,0.30694,0.27157,0.26879,0.36212,0.23418,0.28547,0.27096,0.1411,0.12872,0.13524,0.12986,0.1291,0.12978,0.14303,0.12747,0.12535,0.13023,0.12739,0.13505,0.1282,0.12415,0.11776,0.12253,0.11974,0.12689,0.12711,0.12156,0.12715,0.12717,0.11987,0.067424,0.068052,0.06796,0.067695,0.067962,0.067976,0.27322,0.27396,0.29602,0.28666,0.27448,0.067329,0.067641,0.12465,0.12922,0.11593,0.12642,0.12719,0.12776,0.12768,0.12654,0.12757,0.13125,0.12772,0.12962,0.12713,0.15205,0.14598,0.12344,0.13062,0.12672,0.13063,0.12699,0.12688,0.067214,0.067493,0.068044,0.068151,0.068598,0.06714,0.06732,0.067977,0.067975,0.067873,0.26663,0.29551,0.067547,0.067531,0.067596,0.067821,0.13231,0.11355,0.13275,0.12275,0.12268,0.13832,0.12745,0.12739,0.12679,0.12684,0.12609,0.1335,0.12712,0.12766,0.13398,0.1297,0.12645,0.12986,0.12128,0.067179,0.068036,0.06742,0.067395,0.067774,0.067913,0.068385,0.067127,0.067793,0.067468,0.067643,0.068348,0.067762,0.066873,0.067943,0.067278,0.067623,0.12744,0.12663,0.12724,0.11807,0.13147,0.11766,0.12331,0.12775,0.12804,0.13596,0.12869,0.12697,0.13529,0.13312,0.13035,0.12497,0.067629,0.067675,0.067734,0.067929,0.06768,0.067631,0.067964,0.06769,0.067996,0.067576,0.067698,0.067177,0.067686,0.067439,0.067902,0.067456,0.067258,0.067178,0.067676,0.11681,0.1281,0.1403,0.12762,0.11807,0.12754,0.13127,0.12939,0.12741,0.12818,0.13267,0.12712,0.14531,0.067731,0.068312,0.068054,0.067015,0.067577,0.067805,0.067731,0.066724,0.067313,0.067585,0.067583,0.06761,0.067893,0.068025,0.068122,0.067424,0.067572,0.067231,0.067813,0.067719,0.068081,0.12741,0.11653,0.12529,0.12521,0.12537,0.10326,0.12733,0.12756,0.12562,0.067633,0.067953,0.067899,0.068012,0.067533,0.067269,0.067667,0.067493,0.068194,0.06798,0.067772,0.068136,0.067511,0.067498,0.068164,0.06721,0.067803,0.067808,0.067115,0.06774,0.068251,0.066816,0.067719,0.067698,0.067514,0.1156,0.12976,0.13444,0.11028,0.067982,0.067329,0.067438,0.068336,0.067836,0.068483,0.068073,0.066821,0.067859,0.067897,0.066996,0.068151,0.067013,0.067615,0.068013,0.068026,0.068103,0.067215,0.066912,0.067447,0.067502,0.067628,0.067409,0.067783,0.067632,0.067254,0.067188,0.067574,0.068118,0.068435,0.067674,0.06768,0.067688,0.067917,0.067928,0.067705,0.068073,0.067516,0.067866,0.067477,0.068016,0.067245,0.06809,0.067581,0.067389,0.067907,0.067637,0.067782,0.067904,0.067674,0.067656,0.067797,0.06704,0.067454,0.067643,0.067683,0.06747,0.067817,0.067546,0.067524,0.067826,0.067841,0.067842,0.067889,0.068266,0.067561,0.068393,0.068276,0.068624,0.067253,0.067369,0.067343,0.067978,0.067898,0.067187,0.067607,0.067686,0.067885,0.068211,0.067243,0.067629,0.067766,0.067697,0.067871,0.067947,0.067693,0.067862,0.068502,0.067175,0.068435,0.066854,0.068272,0.06784,0.067635,0.067526,0.068254,0.067239,0.067437,0.067579,0.067805,0.067881,0.067641,0.068021,0.067833,0.067722,0.067974,0.067714,0.067368,0.068305,0.067071,0.06771,0.067952,0.06769,

0.067448,0.067578,0.067639,0.067641,0.067611,0.067535,0.067639,0.067227,0.067244,0.068228,0.067256,0.067647,0.067589,0.06829,0.067306,0.067664,0.067245,0.067616,0.067896,0.068199,0.067596,0.066897,0.067757,0.067941,0.067065,0.068296,0.067661,0.067575,0.067327,0.067295,0.067751,0.068167,0.067739,0.067203,0.067259,0.068127,0.067608,0.06753,0.067614,0.067789,0.067692,0.067651,0.067693,0.067845,0.067491,0.067525,0.068002,0.067881,0.068279,0.068194,0.068296,0.06755,0.066904,0.068094,0.068691,0.067545,0.067801,0.067509,0.06767,0.067227,0.067691,0.06829,0.067941,0.066974,0.068363,0.06774,0.067458,0.06771,0.068394,0.067623,0.067325,0.067714,0.068449,0.067683,0.067785,0.067808,0.067222,0.067026,0.068029,0.068201,0.067696,0.067826

0.19048,0.18992,0.19088,0.19008,0.19062,0.19002,0.19138,0.19081,0.18955,0.1909,0.19109,0.19088,0.19112,0.19078,0.18996,0.19058,0.19046,0.19095,0.19123,0.19115,0.31915,0.30053,0.31346,0.31195,0.18893,0.19125,0.19125,0.19029,0.19041,0.19062,0.19069,0.19059,0.19023,0.19117,0.19069,0.19056,0.19163,0.18966,0.19099,0.43611,0.31062,0.31066,0.31202,0.31617,0.26958,0.31459,0.19081,0.19148,0.19105,0.19032,0.19004,0.18947,0.19147,0.19122,0.19044,0.19053,0.19062,0.19025,0.19022,0.19155,0.19115,0.43244,0.42832,0.28212,0.30261,0.31567,0.31387,0.30881,0.32668,0.32625,0.29111,0.191,0.19141,0.19013,0.19144,0.19152,0.19097,0.19076,0.19101,0.19091,0.19115,0.19158,0.19068,0.19071,0.19035,0.19063,0.43013,0.43588,0.42833,0.31188,0.32142,0.33168,0.29791,0.33184,0.29035,0.36307,0.3157,0.31536,0.19043,0.19111,0.19045,0.19148,0.1903,0.19047,0.19024,0.19152,0.19109,0.19006,0.19081,0.19163,0.18979,0.19047,0.19072,0.18976,0.44191,0.44574,0.44101,0.43511,0.29661,0.32061,0.31448,0.31987,0.31079,0.31387,0.31829,0.31257,0.31355,0.31578,0.19165,0.19086,0.1913,0.19093,0.18996,0.19093,0.19154,0.19089,0.19039,0.19049,0.19165,0.1901,0.19202,0.19009,0.19028,0.19133,0.42765,0.44598,0.43333,0.43447,0.44167,0.43337,0.31328,0.3411,0.314,0.312,0.3143,0.32201,0.31652,0.32216,0.31435,0.32097,0.19091,0.19096,0.19044,0.19137,0.19006,0.19181,0.19111,0.19119,0.1905,0.19072,0.19098,0.19125,0.19087,0.18955,0.19108,0.19099,0.18997,0.43316,0.44321,0.42938,0.43624,0.43967,0.42949,0.32314,0.30814,0.33247,0.31031,0.32109,0.33632,0.31117,0.31154,0.31616,0.30302,0.32427,0.19084,0.19265,0.19043,0.19042,0.19031,0.19054,0.18978,0.18975,0.19161,0.19105,0.1908,0.18943,0.19024,0.12442,0.13368,0.1278,0.18926,0.43269,0.43821,0.42259,0.42809,0.43243,0.43593,0.44089,0.31854,0.33174,0.3129,0.30981,0.32012,0.30328,0.28274,0.31567,0.31677,0.30799,0.31401,0.19114,0.19129,0.19139,0.19098,0.19009,0.19091,0.19024,0.1908,0.19154,0.19024,0.19021,0.12347,0.11515,0.11566,0.12518,0.11942,0.11583,0.19166,0.43184,0.44115,0.44865,0.4371,0.43472,0.43014,0.43796,0.29603,0.31493,0.31091,0.31375,0.30713,0.32259,0.31393,0.33046,0.31332,0.31145,0.33705,0.19082,0.19097,0.19204,0.19195,0.18998,0.19078,0.19044,0.19083,0.1907,0.12936,0.11696,0.1323,0.12403,0.13113,0.12755,0.1255,0.1068,0.12444,0.19067,0.43619,0.43936,0.43056,0.44356,0.43499,0.43095,0.43324,0.32573,0.32799,0.32039,0.30941,0.30319,0.31562,0.31792,0.30358,0.30956,0.33823,0.3098,0.31752,0.19028,0.19002,0.19081,0.19078,0.18995,0.19078,0.1255,0.12456,0.12294,0.12503,0.12812,0.12499,0.12607,0.13747,0.12494,0.12453,0.11914,0.12277,0.44014,0.43796,0.43727,0.44202,0.43321,0.43534,0.43487,0.31153,0.30552,0.3239,0.31331,0.31457,0.31454,0.30643,0.3305,0.32552,0.32213,0.31208,0.30266,0.18986,0.19087,0.19226,0.12195,0.13478,0.12462,0.14271,0.12489,0.12731,0.13859,0.097291,0.12471,0.12572,0.13144,0.12123,0.11348,0.13075,0.12508,0.4349,0.43851,0.43446,0.43109

,0.43764,0.44058,0.43385,0.43966,0.43338,0.31385,0.30388,0.29119,0.31277,0.31911,0.27506,0.31157,0.3068,0.31235,0.31887,0.31748,0.12491,0.13635,0.13574,0.12565,0.12471,0.12177,0.12059,0.12525,0.1527,0.12504,0.11954,0.1221,0.12575,0.12534,0.12515,0.13029,0.14345,0.13119,0.43573,0.43238,0.4412,0.42609,0.44031,0.43867,0.43088,0.45187,0.44005,0.32694,0.32157,0.22934,0.23087,0.23377,0.23136,0.23535,0.23072,0.22526,0.23741,0.25449,0.11355,0.12289,0.1247,0.12301,0.12466,0.10212,0.12347,0.12839,0.117,0.12446,0.13436,0.1158,0.12685,0.12487,0.12571,0.11708,0.11975,0.11988,0.42945,0.45144,0.42899,0.43102,0.43974,0.44407,0.43985,0.4407,0.43878,0.24243,0.22509,0.25557,0.22672,0.2249,0.23143,0.22807,0.19777,0.21753,0.24641,0.22954,0.12486,0.10441,0.12567,0.12504,0.12775,0.12509,0.11101,0.12353,0.13106,0.12383,0.11331,0.12445,0.13343,0.12667,0.13087,0.13276,0.12188,0.13526,0.43204,0.4365,0.44451,0.44402,0.42935,0.42507,0.43757,0.24671,0.28084,0.26958,0.23125,0.24337,0.22731,0.24477,0.24752,0.22507,0.23357,0.24036,0.21809,0.23344,0.12539,0.13956,0.12478,0.11635,0.10499,0.1105,0.11389,0.12509,0.12475,0.12517,0.12579,0.1247,0.12504,0.12543,0.12549,0.12091,0.10091,0.13043,0.43442,0.43452,0.43555,0.43698,0.42587,0.44421,0.261,0.25437,0.23924,0.1988,0.23075,0.23049,0.21171,0.24529,0.1981,0.21111,0.21681,0.25201,0.23881,0.2501,0.12529,0.12119,0.12436,0.12165,0.1127,0.13002,0.12108,0.10404,0.12732,0.12062,0.13204,0.11167,0.11918,0.12687,0.12054,0.12481,0.12141,0.11029,0.43841,0.44162,0.44297,0.43913,0.43975,0.23275,0.24679,0.24622,0.24181,0.23137,0.24406,0.20159,0.20178,0.24673,0.2106,0.23555,0.22906,0.22717,0.22732,0.23106,0.12412,0.11819,0.13017,0.12443,0.12468,0.1273,0.13867,0.12678,0.11959,0.12498,0.12284,0.11784,0.12504,0.12241,0.12343,0.12464,0.13348,0.12978,0.43653,0.44109,0.43691,0.25102,0.24411,0.24486,0.24688,0.25205,0.2405,0.2532,0.21414,0.22943,0.22339,0.23047,0.19649,0.20666,0.23609,0.22554,0.19391,0.22696,0.15292,0.12758,0.12444,0.12464,0.12468,0.12488,0.11988,0.12495,0.13705,0.12274,0.12845,0.11478,0.12469,0.11424,0.099144,0.12725,0.13088,0.1241,0.44023,0.25319,0.25895,0.23762,0.24653,0.27228,0.2486,0.28305,0.24703,0.23669,0.1863,0.22971,0.23842,0.22137,0.21017,0.23167,0.2356,0.21855,0.22169,0.12844,0.12406,0.12029,0.11547,0.12462,0.12481,0.12222,0.11588,0.12428,0.1287,0.12453,0.12474,0.1245,0.11707,0.111,0.12799,0.12563,0.058855,0.2289,0.24357,0.22913,0.1786,0.27001,0.1775,0.21724,0.26,0.26172,0.24997,0.22862,0.24308,0.25593,0.19615,0.22259,0.26785,0.2278,0.23216,0.21885,0.12974,0.1261,0.1258,0.12944,0.12633,0.13755,0.12596,0.11246,0.12415,0.10868,0.12463,0.12469,0.1315,0.12158,0.12485,0.12818,0.1249,0.058983,0.26881,0.28708,0.25365,0.24547,0.19796,0.24437,0.25055,0.24829,0.24812,0.25018,0.26349,0.22112,0.22718,0.2266,0.22666,0.24216,0.22735,0.21871,0.12485,0.11832,0.11746,0.13866,0.12657,0.13775,0.12502,0.13144,0.1258,0.12434,0.1193,0.12447,0.12701,0.11249,0.12431,0.12371,0.11886,0.12079,0.058347,0.26097,0.25111,0.17548,0.22672,0.26241,0.23705,0.25189,0.24979,0.24617,0.24477,0.22561,0.19696,0.22624,0.22855,0.23046,0.21216,0.2146,0.24572,0.11806,0.12479,0.14729,0.12437,0.13312,0.12489,0.12647,0.12421,0.11587,0.13249,0.12489,0.11775,0.12917,0.12252,0.12448,0.12519,0.14513,0.059277,0.05887,0.058892,0.32682,0.2361,0.2474,0.24467,0.28577,0.25994,0.249,0.24845,0.21855,0.22738,0.20483,0.20965,0.23902,0.23008,0.23006,0.11757,0.12471,0.12471,0.13786,0.10336,0.11339,0.13232,0.12885,0.11071,0.12249,0.12615,0.12652,0.1153,0.13516,0.078794,0.11415,0.13722,0.1283,0.058932,0.058818,0.059106,0.058666,0.24429,0.27754,0.28046,0.23418,0.24978,0.21426,0.23851,0.22714,0.2493,0.18356,0.22966,0.2097,0.

11731,0.12453,0.16736,0.12079,0.11828,0.12251,0.12126,0.12424,0.13964,  
0.1267,0.12525,0.1347,0.11964,0.12508,0.15785,0.12957,0.12448,0.12935,  
0.12453,0.12896,0.058888,0.059044,0.058888,0.059032,0.059117,0.059536,  
0.27441,0.27888,0.24752,0.24312,0.33219,0.21467,0.26033,0.24619,0.1402  
,0.12657,0.1336,0.12761,0.12675,0.12781,0.14219,0.1252,0.12288,0.12775  
,0.1251,0.1335,0.12623,0.12133,0.1146,0.11959,0.11662,0.1245,0.1247,0.  
1186,0.12472,0.12473,0.11679,0.058723,0.059183,0.059266,0.058981,0.059  
103,0.059145,0.24956,0.24784,0.27058,0.2589,0.24985,0.05872,0.058729,0  
.12201,0.12684,0.11212,0.12419,0.12474,0.12527,0.12522,0.12409,0.12492  
,0.12926,0.12515,0.12762,0.12468,0.15249,0.14512,0.12059,0.12835,0.124  
21,0.12843,0.12466,0.12438,0.058355,0.05871,0.059259,0.059578,0.059684  
,0.058186,0.058371,0.05901,0.059324,0.059296,0.24107,0.26804,0.058577,  
0.058741,0.058895,0.058989,0.13022,0.10991,0.13103,0.11971,0.11966,0.1  
3715,0.12518,0.12499,0.12435,0.12436,0.12363,0.1318,0.12459,0.12525,0.  
13213,0.1274,0.12391,0.12795,0.1183,0.058467,0.059094,0.058791,0.05853  
1,0.058518,0.059116,0.059241,0.058562,0.059298,0.058934,0.058652,0.059  
321,0.059164,0.058342,0.059116,0.058689,0.058959,0.12517,0.12417,0.125  
03,0.11454,0.12963,0.11404,0.12041,0.12531,0.12599,0.13462,0.12653,0.1  
2452,0.13363,0.13141,0.12852,0.12232,0.059013,0.058913,0.058532,0.0591  
67,0.05891,0.058935,0.059228,0.058709,0.059195,0.058675,0.059011,0.058  
52,0.058757,0.058684,0.059043,0.059015,0.058299,0.058416,0.058705,0.11  
329,0.12549,0.13946,0.12518,0.11457,0.12515,0.12933,0.12724,0.12498,0.  
12574,0.13106,0.12461,0.14468,0.058972,0.05931,0.059224,0.058256,0.058  
956,0.059272,0.05884,0.058209,0.058533,0.058693,0.058716,0.058704,0.05  
9121,0.058957,0.05958,0.058695,0.059129,0.058277,0.058693,0.058751,0.0  
59125,0.12483,0.11286,0.12268,0.12268,0.1228,0.098342,0.12487,0.12546,  
0.12322,0.058889,0.058983,0.059018,0.059014,0.058964,0.058593,0.058945  
,0.058944,0.059241,0.059383,0.058989,0.059529,0.058915,0.058588,0.0594  
13,0.058614,0.058975,0.059062,0.058422,0.059284,0.059499,0.058088,0.05  
8769,0.059096,0.058623,0.11193,0.12759,0.13269,0.10615,0.059297,0.0585  
09,0.058866,0.059442,0.059104,0.059779,0.059307,0.05817,0.059131,0.058  
874,0.058496,0.059324,0.05831,0.058693,0.058994,0.059223,0.059227,0.05  
8455,0.058091,0.058689,0.058742,0.058912,0.058334,0.058922,0.059123,0.  
058437,0.058286,0.058755,0.059347,0.059655,0.058864,0.058737,0.058904,  
0.05903,0.059232,0.058804,0.05907,0.058905,0.059317,0.059161,0.059567,  
0.058702,0.059351,0.05908,0.058805,0.05901,0.058622,0.059135,0.058894,  
0.058538,0.059112,0.058678,0.058381,0.058676,0.058941,0.058789,0.05854  
3,0.059322,0.058674,0.058632,0.059025,0.059036,0.059111,0.058699,0.059  
44,0.05845,0.059318,0.059591,0.059474,0.058456,0.058949,0.058785,0.059  
437,0.059005,0.058574,0.058744,0.059009,0.059016,0.059391,0.058342,0.0  
5885,0.058901,0.058892,0.058817,0.059215,0.058788,0.059306,0.059615,0.  
058437,0.059778,0.058234,0.059459,0.05938,0.058826,0.058729,0.059284,0  
.058766,0.058647,0.058609,0.059117,0.059131,0.058833,0.059304,0.059323  
,0.058478,0.058843,0.058877,0.058661,0.059674,0.058361,0.058769,0.0589  
92,0.058757,0.058288,0.058939,0.059,0.058936,0.058836,0.058794,0.05874  
7,0.058559,0.058732,0.059467,0.058848,0.058427,0.058805,0.059309,0.058  
333,0.0589,0.058439,0.059158,0.05929,0.059376,0.058944,0.058199,0.0589  
5,0.059169,0.058587,0.059592,0.058811,0.059146,0.058551,0.058334,0.059  
304,0.059301,0.059103,0.058375,0.05868,0.05923,0.058553,0.058517,0.058  
928,0.05896,0.059026,0.058755,0.05856,0.059159,0.058513,0.058886,0.059  
361,0.059079,0.05995,0.059377,0.059393,0.058683,0.058259,0.059328,0.06  
0133,0.059069,0.058929,0.058719,0.059133,0.058423,0.058822,0.059287,0.

059099,0.058195,0.05958,0.058792,0.058592,0.058872,0.059271,0.059034,0  
.058712,0.059044,0.059556,0.058862,0.058992,0.059117,0.058472,0.058403  
,0.05927,0.059513,0.05883,0.058922  
0.1939,0.19291,0.19388,0.19342,0.19392,0.19323,0.19423,0.19363,0.19232  
,0.1939,0.19421,0.19405,0.19386,0.19372,0.19287,0.1933,0.19335,0.19397  
,0.1944,0.19428,0.30623,0.29111,0.30155,0.30322,0.19249,0.19414,0.1939  
5,0.19337,0.19351,0.19339,0.19392,0.19337,0.19317,0.19436,0.19405,0.19  
347,0.19446,0.19283,0.19392,0.41419,0.30014,0.29927,0.3016,0.30623,0.2  
6339,0.30304,0.19394,0.19409,0.19437,0.19278,0.19302,0.19275,0.19428,0  
.19433,0.19335,0.19345,0.19327,0.19359,0.193,0.19413,0.19394,0.40658,0  
.399,0.27263,0.29224,0.3041,0.30557,0.29846,0.31479,0.31263,0.28294,0.  
19398,0.19444,0.19293,0.19393,0.19418,0.19449,0.19348,0.19391,0.19367,  
0.19374,0.19438,0.19349,0.19393,0.19335,0.1937,0.40826,0.40864,0.40014  
,0.29943,0.31027,0.31747,0.28798,0.31765,0.28122,0.34557,0.30379,0.301  
57,0.19289,0.19421,0.19308,0.1945,0.19301,0.19367,0.19272,0.19452,0.19  
416,0.19307,0.1938,0.19453,0.19268,0.19384,0.19396,0.19292,0.41408,0.4  
2096,0.41657,0.40799,0.28617,0.30795,0.30266,0.30763,0.29781,0.30246,0  
.30445,0.30206,0.30359,0.30396,0.19439,0.194,0.19451,0.19386,0.19285,0  
.19355,0.19474,0.19368,0.19367,0.19363,0.19394,0.19328,0.19492,0.193,0  
.19328,0.19447,0.39941,0.41984,0.40738,0.40484,0.4158,0.40229,0.30171,  
0.32638,0.30226,0.2997,0.30302,0.30676,0.30234,0.31255,0.30376,0.30876  
,0.19376,0.19402,0.19348,0.19454,0.1931,0.19478,0.19436,0.19406,0.1934  
1,0.19366,0.19392,0.19368,0.194,0.19265,0.19408,0.19362,0.19362,0.4085  
3,0.41354,0.40179,0.4085,0.41541,0.40476,0.30938,0.29533,0.31982,0.299  
35,0.3094,0.3212,0.29994,0.3003,0.30497,0.29124,0.31451,0.19319,0.1957  
4,0.19285,0.19369,0.19367,0.19292,0.19309,0.19278,0.19456,0.19447,0.19  
403,0.19255,0.19351,0.12299,0.13285,0.12672,0.19265,0.40899,0.4121,0.3  
9691,0.40451,0.40664,0.40797,0.41354,0.30662,0.31682,0.30168,0.29844,0  
.30784,0.29168,0.27351,0.3041,0.30451,0.29749,0.30048,0.19409,0.19399,  
0.19463,0.19373,0.19316,0.19384,0.19353,0.19414,0.19485,0.1936,0.19391  
,0.12175,0.11291,0.1136,0.12371,0.11724,0.1136,0.19436,0.40375,0.41248  
,0.42362,0.4084,0.41267,0.40482,0.41164,0.28578,0.30285,0.29936,0.3013  
3,0.29667,0.30983,0.30238,0.31849,0.29944,0.29969,0.32386,0.19389,0.19  
381,0.19464,0.19467,0.1929,0.19359,0.19351,0.19381,0.19268,0.12802,0.1  
1477,0.13083,0.12246,0.12966,0.12618,0.12386,0.10419,0.12272,0.19358,0  
.41204,0.41235,0.40696,0.41551,0.4136,0.40769,0.40938,0.3123,0.31485,0  
.30558,0.29922,0.29342,0.30432,0.30595,0.29326,0.2991,0.324,0.29867,0.  
30705,0.19334,0.19315,0.19427,0.1937,0.19285,0.19362,0.12399,0.12289,0  
.12132,0.12332,0.12651,0.12325,0.12453,0.13663,0.12318,0.12293,0.11718  
,0.12099,0.4166,0.41251,0.41282,0.41367,0.41074,0.41017,0.41423,0.3011  
7,0.29415,0.31077,0.3005,0.302,0.30425,0.29554,0.31717,0.31121,0.30818  
,0.3012,0.29158,0.19291,0.19392,0.19482,0.11993,0.13384,0.12288,0.1425  
4,0.12355,0.12563,0.13812,0.093828,0.12322,0.1242,0.13043,0.11948,0.11  
094,0.12942,0.1237,0.4111,0.41376,0.40488,0.40897,0.41132,0.41415,0.41  
069,0.41273,0.40513,0.30289,0.29366,0.28338,0.30158,0.30657,0.26786,0.  
30002,0.2978,0.30096,0.30497,0.3044,0.12327,0.13579,0.13493,0.12421,0.  
12308,0.11999,0.11859,0.12365,0.15296,0.12323,0.11746,0.12069,0.12431,  
0.124,0.12373,0.12903,0.14313,0.13035,0.41153,0.41199,0.41036,0.4017,0  
.41304,0.41206,0.40229,0.42469,0.41065,0.3135,0.31006,0.22,0.22264,0.2  
2505,0.22272,0.22505,0.21961,0.21616,0.22821,0.24559,0.11121,0.12115,0  
.12311,0.12146,0.1231,0.098854,0.12182,0.12722,0.11503,0.1228,0.13343,  
0.11361,0.12552,0.12314,0.12419,0.11502,0.11797,0.11775,0.4046,0.42423

,0.40638,0.40613,0.41098,0.42034,0.41266,0.41578,0.41435,0.22498,0.21741,0.24361,0.21773,0.21647,0.22106,0.21898,0.19098,0.20927,0.23652,0.22123,0.12308,0.10137,0.12411,0.12343,0.12621,0.12354,0.10838,0.1218,0.12981,0.1223,0.11094,0.12279,0.13234,0.12511,0.12977,0.13163,0.12006,0.13454,0.40754,0.41195,0.41874,0.4193,0.4028,0.40191,0.41068,0.23099,0.26441,0.25345,0.21904,0.2332,0.21743,0.23353,0.23611,0.21595,0.22403,0.23079,0.21,0.22438,0.12385,0.13892,0.12306,0.11433,0.10235,0.10786,0.11142,0.12347,0.12295,0.12384,0.12417,0.12314,0.12346,0.12391,0.12404,0.11914,0.09733,0.12933,0.4124,0.40698,0.41219,0.40873,0.39712,0.4185,0.24444,0.2388,0.22658,0.18705,0.2151,0.2193,0.20063,0.23437,0.19107,0.20337,0.20805,0.23957,0.23031,0.23929,0.12389,0.11933,0.1228,0.11972,0.1103,0.12884,0.11926,0.10098,0.12601,0.11876,0.13086,0.10919,0.11745,0.12552,0.11874,0.1233,0.11949,0.10755,0.4111,0.4172,0.41685,0.41057,0.41516,0.21901,0.23128,0.23073,0.22844,0.21402,0.22946,0.1947,0.19355,0.23792,0.20126,0.22334,0.21912,0.21911,0.21897,0.22095,0.12226,0.11636,0.12909,0.12306,0.12326,0.12596,0.138,0.12521,0.11777,0.12354,0.12117,0.11578,0.12338,0.12064,0.12167,0.12334,0.13236,0.12882,0.41024,0.41499,0.40938,0.23333,0.22872,0.2294,0.23251,0.2355,0.22469,0.23656,0.19885,0.21958,0.21573,0.21901,0.18714,0.19931,0.22451,0.21547,0.18754,0.2183,0.15316,0.12629,0.12289,0.12312,0.12319,0.12346,0.11797,0.12331,0.13624,0.12087,0.12713,0.11238,0.12289,0.11206,0.095805,0.126,0.12969,0.12254,0.41148,0.23475,0.24297,0.22197,0.22967,0.25339,0.23335,0.26557,0.23114,0.22125,0.17969,0.21986,0.22954,0.21353,0.20335,0.22113,0.22366,0.20828,0.2119,0.12745,0.12257,0.11849,0.11343,0.12312,0.12324,0.12069,0.1139,0.12278,0.12726,0.1227,0.12307,0.12283,0.11527,0.10832,0.12674,0.12423,0.052719,0.2131,0.22747,0.21417,0.16542,0.25342,0.16544,0.20452,0.24184,0.24541,0.23259,0.21866,0.23336,0.24285,0.18927,0.21205,0.2574,0.21952,0.2228,0.20897,0.12875,0.1248,0.12431,0.12815,0.12495,0.13662,0.12448,0.11006,0.12265,0.10598,0.12316,0.12335,0.13032,0.1196,0.12332,0.12691,0.1231,0.053059,0.25363,0.26999,0.23783,0.22798,0.18525,0.22905,0.23415,0.23127,0.2337,0.23517,0.25095,0.21106,0.21871,0.21674,0.21699,0.23208,0.21801,0.20962,0.12323,0.11637,0.11552,0.13787,0.12515,0.13709,0.12354,0.13013,0.12435,0.12279,0.11737,0.12302,0.12557,0.11026,0.1227,0.12232,0.11694,0.11886,0.052607,0.24615,0.2368,0.16218,0.21326,0.24639,0.22028,0.23479,0.23091,0.23163,0.2281,0.21541,0.18916,0.2172,0.21744,0.22202,0.20385,0.2043,0.23382,0.11591,0.12327,0.14732,0.12266,0.13208,0.1235,0.12481,0.12268,0.1138,0.13129,0.12338,0.11569,0.12751,0.12103,0.12297,0.12388,0.14512,0.05307,0.052888,0.052682,0.31091,0.22105,0.2316,0.23002,0.26745,0.2425,0.23113,0.23242,0.20576,0.2179,0.19722,0.20152,0.22828,0.21926,0.21955,0.11557,0.1232,0.12307,0.13739,0.10044,0.11134,0.13129,0.12765,0.10809,0.12089,0.1245,0.1253,0.11309,0.13442,0.074302,0.11202,0.13655,0.12683,0.05275,0.052594,0.053184,0.052309,0.22856,0.26063,0.26028,0.2206,0.23092,0.19832,0.22164,0.21248,0.23383,0.17712,0.21902,0.2021,0.11508,0.12288,0.16867,0.11912,0.11643,0.12095,0.11954,0.12291,0.1389,0.12515,0.12366,0.13368,0.11766,0.12337,0.15896,0.12843,0.12305,0.12817,0.12269,0.12805,0.052896,0.053149,0.052781,0.053134,0.053071,0.0535,0.25864,0.26123,0.22987,0.22803,0.31127,0.20064,0.24186,0.23138,0.13987,0.12502,0.13305,0.12633,0.12555,0.12661,0.1419,0.12357,0.12125,0.12641,0.12339,0.13259,0.12464,0.11973,0.11241,0.11761,0.11453,0.12313,0.12292,0.11665,0.12299,0.12326,0.11462,0.052595,0.052879,0.05317,0.052899,0.05301,0.052976,0.23449,0.2328,0.25327,0.23987,0.23515,0.052105,0.052663,0.12022,0.12541,0.10993,0

.12254,0.1231,0.12349,0.12346,0.12274,0.12336,0.12793,0.12351,0.1263,0  
.12311,0.15253,0.14522,0.11869,0.12721,0.12281,0.12719,0.12306,0.1227,  
0.052155,0.052461,0.053056,0.053407,0.053441,0.052155,0.052136,0.05283  
6,0.052985,0.052903,0.22535,0.2488,0.052311,0.052694,0.052952,0.052881  
,0.12891,0.10714,0.13003,0.11789,0.11772,0.13629,0.12362,0.12341,0.122  
57,0.12255,0.12205,0.13096,0.1232,0.12359,0.13108,0.12593,0.12247,0.12  
661,0.11618,0.052265,0.05281,0.052745,0.052499,0.052541,0.053072,0.052  
95,0.052475,0.053149,0.052765,0.052659,0.05326,0.053123,0.052537,0.052  
802,0.052641,0.052895,0.12349,0.12272,0.12338,0.11226,0.12854,0.1117,0  
.11861,0.12369,0.12448,0.13365,0.12534,0.12311,0.13288,0.13036,0.12728  
,0.12078,0.052967,0.053007,0.052539,0.052807,0.052717,0.052945,0.05314  
5,0.052347,0.053126,0.052672,0.052903,0.052434,0.052833,0.052494,0.052  
851,0.052729,0.052327,0.052416,0.052483,0.11073,0.12395,0.13883,0.1236  
9,0.11245,0.12369,0.12809,0.12585,0.12355,0.12416,0.1297,0.12292,0.144  
48,0.052952,0.05311,0.053208,0.052275,0.052714,0.05295,0.052662,0.0524  
24,0.052663,0.052638,0.052824,0.052391,0.053112,0.052793,0.053269,0.05  
264,0.053119,0.052316,0.052868,0.052481,0.052879,0.12327,0.11052,0.120  
99,0.12102,0.12113,0.094957,0.12344,0.12378,0.1216,0.052795,0.05277,0.  
052809,0.052976,0.052685,0.052711,0.052834,0.052905,0.053087,0.052999,  
0.052639,0.053206,0.052901,0.052261,0.053259,0.052559,0.052867,0.05311  
,0.052626,0.0528,0.053503,0.052283,0.052819,0.053062,0.052553,0.1095,0  
.12605,0.13158,0.10324,0.053395,0.052484,0.052778,0.053474,0.052919,0.  
05336,0.053213,0.052341,0.052898,0.052642,0.052369,0.053247,0.05229,0.  
052824,0.052967,0.052978,0.053078,0.052442,0.051992,0.052616,0.052598,  
0.052707,0.052143,0.052614,0.053155,0.052207,0.0521,0.052857,0.053384,  
0.053448,0.052866,0.052449,0.052482,0.052827,0.053058,0.052873,0.05287  
5,0.052851,0.05308,0.05307,0.053607,0.052419,0.05289,0.053023,0.052721  
,0.052841,0.052395,0.053621,0.052785,0.052626,0.053029,0.052567,0.0523  
97,0.052585,0.052825,0.05278,0.052263,0.053019,0.05238,0.052463,0.0532  
23,0.052719,0.052907,0.052554,0.053408,0.052599,0.053454,0.053258,0.05  
3449,0.052328,0.052442,0.052865,0.053341,0.052957,0.052462,0.052425,0.  
052465,0.053116,0.053173,0.052393,0.052529,0.052809,0.052765,0.052726,  
0.053098,0.052722,0.053055,0.05339,0.052258,0.053727,0.052325,0.053172  
,0.053018,0.05261,0.052616,0.053185,0.052725,0.052643,0.052743,0.05313  
7,0.053107,0.052375,0.052932,0.05326,0.052188,0.052918,0.052626,0.0525  
35,0.053616,0.052292,0.052905,0.053163,0.052757,0.052019,0.053049,0.05  
2737,0.05279,0.052558,0.052567,0.052761,0.052593,0.052698,0.053246,0.0  
52466,0.052302,0.052689,0.053247,0.05226,0.052909,0.05232,0.053064,0.0  
53316,0.053405,0.052959,0.052384,0.052631,0.053451,0.05283,0.053502,0.  
052809,0.052746,0.05268,0.052518,0.05329,0.053021,0.052787,0.052094,0.  
052565,0.052488,0.052452,0.052591,0.052413,0.05279,0.052768,0.052745,0.  
.05281,0.052623,0.052625,0.052688,0.053414,0.052866,0.053509,0.053013,  
0.0532,0.052469,0.052348,0.053115,0.054041,0.052965,0.052856,0.052395,  
0.052996,0.052445,0.052531,0.053119,0.052839,0.051845,0.053458,0.05245  
9,0.052397,0.052717,0.053231,0.052836,0.052732,0.052756,0.05361,0.0526  
17,0.05301,0.053022,0.052764,0.052376,0.053316,0.053221,0.052543,0.053  
083  
0.19657,0.19569,0.19621,0.19634,0.19621,0.19531,0.1965,0.19629,0.19444  
,0.19643,0.19643,0.1964,0.19607,0.19611,0.1949,0.1958,0.19543,0.19603,  
0.19666,0.19684,0.29695,0.28453,0.2939,0.29383,0.19488,0.19644,0.19608  
,0.19597,0.19588,0.19551,0.19655,0.19568,0.19567,0.19655,0.19685,0.196  
02,0.19686,0.19503,0.19641,0.39522,0.29303,0.29411,0.29533,0.29857,0.2

5879,0.2952,0.19652,0.19626,0.19684,0.19482,0.19538,0.19539,0.19718,0.19669,0.1957,0.19595,0.19526,0.19599,0.19541,0.19655,0.19651,0.38912,0.38065,0.26742,0.28605,0.29443,0.29865,0.29179,0.30732,0.30506,0.27623,0.1965,0.19679,0.19535,0.19632,0.19649,0.19678,0.19582,0.19591,0.19582,0.19585,0.19663,0.19542,0.19598,0.19611,0.19608,0.38954,0.3905,0.38416,0.29394,0.30338,0.30976,0.2825,0.31075,0.27549,0.33773,0.29737,0.29413,0.19538,0.19613,0.19523,0.197,0.19559,0.19603,0.19516,0.19674,0.19628,0.1955,0.19623,0.1966,0.1952,0.19593,0.19629,0.19572,0.39766,0.39898,0.39771,0.39417,0.27953,0.30022,0.29464,0.29942,0.29114,0.29457,0.29653,0.29413,0.29668,0.29738,0.19659,0.19651,0.19653,0.19662,0.19481,0.19585,0.19653,0.19588,0.19595,0.19612,0.19625,0.19576,0.1974,0.19511,0.19562,0.19648,0.38506,0.40233,0.39165,0.38634,0.39647,0.3852,0.29554,0.31752,0.29597,0.29182,0.29417,0.29788,0.29496,0.30454,0.29808,0.29962,0.19562,0.19628,0.19583,0.19645,0.19567,0.19693,0.19661,0.19651,0.19587,0.19609,0.19678,0.19603,0.19604,0.19492,0.19633,0.19592,0.19616,0.3897,0.39702,0.38506,0.39198,0.39295,0.3906,0.3008,0.28896,0.31406,0.29322,0.30192,0.31203,0.2944,0.29406,0.29746,0.28558,0.30835,0.19538,0.19788,0.19516,0.1962,0.19585,0.19526,0.19565,0.19549,0.19701,0.19662,0.19656,0.19505,0.19597,0.12205,0.13216,0.12611,0.19514,0.39433,0.39539,0.38041,0.38924,0.39132,0.38841,0.39585,0.2998,0.31127,0.29634,0.2919,0.29897,0.28706,0.26882,0.29928,0.29748,0.29154,0.2947,0.19689,0.19631,0.197,0.19566,0.19519,0.19615,0.19604,0.19622,0.1968,0.19625,0.19662,0.12107,0.11162,0.11209,0.12276,0.11599,0.11234,0.19678,0.38462,0.39587,0.4056,0.39268,0.39155,0.38612,0.3931,0.27994,0.29855,0.29176,0.29387,0.29147,0.30222,0.29626,0.30793,0.29117,0.29254,0.31419,0.19577,0.19599,0.1967,0.1971,0.19514,0.19553,0.1964,0.19621,0.19489,0.1273,0.11328,0.13001,0.12134,0.12892,0.12538,0.12314,0.10246,0.12175,0.19604,0.39359,0.39635,0.38804,0.39942,0.39807,0.39079,0.39058,0.30232,0.30799,0.29861,0.29385,0.28784,0.29813,0.29933,0.28756,0.29347,0.31533,0.29187,0.29954,0.19544,0.19556,0.19652,0.19591,0.19522,0.19581,0.12305,0.122,0.12047,0.1222,0.12586,0.12246,0.12373,0.13629,0.12216,0.12209,0.11588,0.1201,0.39399,0.40087,0.39845,0.40037,0.39426,0.39384,0.40027,0.29502,0.28906,0.30246,0.29269,0.29287,0.29599,0.2887,0.30533,0.30232,0.29962,0.29256,0.2865,0.19514,0.19657,0.19731,0.11865,0.13355,0.12205,0.14256,0.1226,0.12495,0.13762,0.091574,0.12232,0.12311,0.12992,0.1187,0.10949,0.12883,0.12251,0.39728,0.39296,0.38545,0.39115,0.39819,0.39588,0.39107,0.39698,0.38495,0.29592,0.28634,0.27824,0.29302,0.29931,0.26423,0.29133,0.29067,0.29592,0.29657,0.29766,0.1223,0.13594,0.13466,0.12316,0.12198,0.1191,0.11728,0.12278,0.15346,0.12233,0.11618,0.11958,0.12349,0.12322,0.12294,0.12861,0.14313,0.12962,0.3968,0.39443,0.39728,0.38299,0.39817,0.39597,0.38916,0.40692,0.39316,0.3068,0.30297,0.21465,0.21589,0.21822,0.21663,0.21884,0.21341,0.20981,0.22168,0.23871,0.10984,0.12016,0.12223,0.1203,0.12224,0.096893,0.12059,0.12642,0.11381,0.12171,0.1332,0.1122,0.12452,0.12206,0.1231,0.11378,0.11696,0.11651,0.3892,0.40762,0.39266,0.3872,0.39386,0.40071,0.39567,0.40009,0.39924,0.21506,0.21163,0.23643,0.21097,0.21037,0.21418,0.21028,0.1875,0.20427,0.22829,0.21721,0.12204,0.099386,0.12333,0.12248,0.1254,0.12282,0.10662,0.1209,0.12898,0.1212,0.10953,0.12182,0.13178,0.12428,0.12913,0.13107,0.11884,0.134,0.3917,0.39507,0.40184,0.40481,0.38653,0.38846,0.3993,0.22303,0.2499,0.24301,0.21203,0.2267,0.21068,0.22688,0.23056,0.21088,0.21729,0.22386,0.20374,0.21859,0.12279,0.13893,0.1221,0.11326,0.10046,0.10642,0.1098,0.12258,0.12222,0.12298,0.1235,0.12203,0.12248,0.12315,0.12



31,0.11807,0.09523,0.12869,0.39308,0.3912,0.39743,0.39389,0.38387,0.40  
331,0.23111,0.22934,0.2132,0.17683,0.20555,0.21287,0.19376,0.22733,0.1  
8634,0.19811,0.20326,0.22974,0.22199,0.23293,0.12298,0.11832,0.12202,0  
.11862,0.10881,0.12823,0.11802,0.099167,0.12517,0.11754,0.13008,0.1072  
1,0.11636,0.12476,0.11763,0.12238,0.11859,0.10598,0.39629,0.39996,0.39  
799,0.40023,0.40114,0.20939,0.22383,0.22038,0.21869,0.20334,0.21977,0.  
18997,0.18859,0.23155,0.19573,0.21638,0.21203,0.21228,0.21332,0.21531,  
0.12119,0.11514,0.12834,0.1221,0.12229,0.12544,0.13796,0.12436,0.11648  
,0.12281,0.12021,0.11456,0.12238,0.11951,0.12077,0.12262,0.13189,0.128  
18,0.39464,0.40096,0.39089,0.22206,0.21829,0.21877,0.22107,0.2246,0.21  
483,0.22764,0.18871,0.21272,0.20966,0.21177,0.18131,0.19506,0.21846,0.  
21039,0.18341,0.21224,0.15376,0.12557,0.12221,0.12209,0.12239,0.12246,  
0.11668,0.12262,0.13598,0.11981,0.12673,0.11099,0.12203,0.11076,0.0935  
09,0.12525,0.12899,0.12153,0.39507,0.22428,0.23191,0.21127,0.22054,0.2  
461,0.22173,0.25511,0.2218,0.21262,0.17525,0.21349,0.22166,0.20721,0.1  
9705,0.21514,0.21564,0.20247,0.20579,0.12677,0.12144,0.11734,0.11183,0  
.122,0.1224,0.11943,0.11241,0.1218,0.12636,0.12187,0.12203,0.12184,0.1  
1409,0.10675,0.12587,0.12332,0.048602,0.20363,0.21774,0.20474,0.15822,  
0.24103,0.1569,0.19584,0.23047,0.23288,0.22225,0.21223,0.22842,0.23394  
,0.18551,0.20703,0.25012,0.21298,0.21559,0.20334,0.12808,0.12375,0.123  
41,0.12749,0.12421,0.13658,0.12354,0.10849,0.12183,0.10413,0.12229,0.1  
2213,0.12965,0.11816,0.12248,0.12609,0.12227,0.048963,0.24071,0.25917,  
0.22847,0.21683,0.17448,0.22187,0.22385,0.22169,0.2251,0.22309,0.24443  
,0.20593,0.21241,0.21027,0.2112,0.22604,0.21181,0.20436,0.1224,0.1151,  
0.11435,0.13732,0.1245,0.13681,0.12261,0.12967,0.12336,0.1217,0.11603,  
0.12215,0.12458,0.10855,0.12179,0.12136,0.11563,0.11771,0.04845,0.2357  
1,0.22467,0.15548,0.20344,0.23428,0.21099,0.22781,0.22146,0.22249,0.21  
821,0.20849,0.1832,0.21185,0.21081,0.21578,0.19817,0.19882,0.22794,0.1  
1475,0.12218,0.14738,0.12141,0.13166,0.12254,0.12383,0.12182,0.11232,0  
.13096,0.12228,0.11439,0.12674,0.12003,0.12205,0.12312,0.14504,0.04882  
6,0.048549,0.048665,0.29432,0.20913,0.22002,0.22181,0.25607,0.23275,0.  
22035,0.22107,0.19565,0.2121,0.19225,0.19792,0.22226,0.21331,0.2144,0.  
11433,0.12252,0.12225,0.1371,0.098597,0.10981,0.13071,0.12682,0.10667,  
0.1198,0.1236,0.12485,0.11148,0.13389,0.071396,0.11069,0.13606,0.12601  
,0.048398,0.048785,0.048898,0.048358,0.21825,0.24869,0.24699,0.21085,0  
.22152,0.18679,0.21042,0.20279,0.22528,0.17313,0.21249,0.19718,0.11365  
,0.122,0.16978,0.11775,0.11517,0.11986,0.11842,0.12203,0.13859,0.12416  
,0.1227,0.13351,0.1165,0.12232,0.1594,0.128,0.12231,0.12708,0.12172,0.  
12759,0.048918,0.048947,0.048892,0.048938,0.049088,0.049189,0.24833,0.  
25224,0.2187,0.21774,0.29788,0.18995,0.23067,0.22108,0.1398,0.12413,0.  
13249,0.12528,0.12481,0.12611,0.1418,0.12258,0.12012,0.12561,0.12269,0  
.13223,0.12382,0.11847,0.11113,0.11634,0.11308,0.12229,0.12196,0.11545  
,0.12214,0.12226,0.1132,0.048416,0.048797,0.049083,0.048869,0.048386,0  
.04881,0.22406,0.22071,0.24383,0.23025,0.22594,0.047929,0.048513,0.119  
25,0.12455,0.10855,0.12173,0.12229,0.12256,0.12233,0.12199,0.12257,0.1  
2728,0.12242,0.12549,0.12216,0.15276,0.14543,0.11755,0.12656,0.12221,0  
.1267,0.12206,0.12182,0.048171,0.048264,0.048301,0.049191,0.049253,0.0  
47789,0.048012,0.04862,0.048915,0.048744,0.21627,0.23968,0.048153,0.04  
8654,0.048592,0.048788,0.12848,0.10527,0.12956,0.11682,0.11631,0.13566  
,0.12264,0.12234,0.1214,0.12187,0.12108,0.13033,0.12234,0.12257,0.1305  
4,0.12503,0.12152,0.12591,0.1149,0.048339,0.048631,0.048529,0.048455,0  
.048185,0.048936,0.048636,0.048463,0.048907,0.048528,0.048632,0.049116

,0.04909,0.048428,0.048742,0.048417,0.048753,0.12278,0.12172,0.12224,0.11074,0.12781,0.11038,0.11765,0.12271,0.12364,0.13353,0.12461,0.12246,0.13242,0.13005,0.12648,0.11975,0.048701,0.049203,0.048645,0.048344,0.048467,0.049041,0.048803,0.048156,0.048796,0.04883,0.048283,0.048579,0.048647,0.048329,0.048782,0.048512,0.048288,0.048365,0.048228,0.10945,0.12292,0.13874,0.12271,0.11085,0.12269,0.12718,0.1249,0.12247,0.12343,0.12905,0.12214,0.14444,0.048432,0.048874,0.048839,0.048082,0.048543,0.048698,0.048516,0.048155,0.048698,0.048362,0.048492,0.048256,0.048919,0.048811,0.048782,0.048786,0.048683,0.04828,0.048612,0.048531,0.048744,0.12224,0.10889,0.11968,0.12013,0.12003,0.092802,0.12264,0.12273,0.12053,0.048751,0.048558,0.048671,0.048969,0.048549,0.048299,0.048496,0.048678,0.04888,0.048661,0.0488,0.049044,0.048648,0.048221,0.048996,0.048702,0.048967,0.048829,0.048418,0.048736,0.048855,0.048278,0.048705,0.049049,0.048144,0.1079,0.12502,0.13081,0.10146,0.049408,0.048275,0.048709,0.049249,0.048993,0.048979,0.04853,0.047852,0.048718,0.048463,0.048351,0.049101,0.048181,0.048673,0.048839,0.048984,0.04913,0.048488,0.048012,0.048357,0.048938,0.048438,0.047936,0.048891,0.048875,0.047925,0.048,0.048629,0.049076,0.049388,0.048745,0.048362,0.048368,0.04876,0.049091,0.048824,0.048661,0.048458,0.048822,0.048976,0.04925,0.048151,0.048687,0.048689,0.048831,0.048544,0.0482,0.049469,0.048318,0.048446,0.048871,0.048608,0.048316,0.048724,0.048647,0.04844,0.048366,0.048878,0.048314,0.04841,0.048895,0.048446,0.048875,0.048474,0.049087,0.048272,0.049004,0.04924,0.049012,0.048455,0.048108,0.048614,0.049361,0.04914,0.048385,0.047876,0.048548,0.049036,0.049005,0.048085,0.048385,0.048788,0.048685,0.048762,0.048744,0.0486,0.048687,0.049097,0.048432,0.049743,0.048175,0.048849,0.048946,0.048469,0.04856,0.048981,0.048732,0.048586,0.04883,0.04912,0.048792,0.048049,0.049132,0.049095,0.04778,0.049153,0.048304,0.048524,0.049623,0.048402,0.048486,0.049054,0.048605,0.047633,0.049059,0.0483,0.048779,0.048442,0.048246,0.04867,0.048152,0.048273,0.049006,0.048703,0.048361,0.048367,0.049057,0.04826,0.048655,0.048328,0.048697,0.049098,0.049132,0.048679,0.048382,0.04829,0.049209,0.048342,0.049265,0.048956,0.048833,0.048537,0.048544,0.049155,0.048824,0.04827,0.047813,0.048763,0.048229,0.048396,0.048528,0.04836,0.048747,0.048737,0.048631,0.04853,0.048209,0.04858,0.048702,0.049073,0.048744,0.049429,0.049062,0.049378,0.048473,0.048352,0.048647,0.049748,0.04828,0.048519,0.048291,0.048796,0.048157,0.048199,0.049077,0.048625,0.047681,0.049112,0.048361,0.048296,0.048759,0.04911,0.048766,0.048535,0.048556,0.049191,0.048057,0.048706,0.048623,0.048574,0.04841,0.0491,0.049081,0.048497,0.048605

0.19844,0.19767,0.19822,0.19838,0.1978,0.19739,0.19817,0.19872,0.19646,0.19833,0.1987,0.19782,0.19768,0.19817,0.19673,0.19791,0.19736,0.19797,0.19839,0.19863,0.29308,0.28164,0.29011,0.28944,0.19699,0.19812,0.19856,0.19786,0.1975,0.19746,0.19811,0.19733,0.19754,0.19827,0.1983,0.19809,0.19869,0.19685,0.19863,0.38429,0.28892,0.28928,0.28863,0.29614,0.25704,0.29,0.19861,0.19843,0.19863,0.19697,0.19765,0.19764,0.1987,0.19831,0.19747,0.19772,0.19755,0.19791,0.1976,0.19837,0.19877,0.38196,0.3702,0.26617,0.28093,0.29117,0.29327,0.28829,0.30389,0.30285,0.27347,0.19888,0.19786,0.19707,0.19825,0.19817,0.19865,0.19767,0.19757,0.19791,0.19799,0.19845,0.19683,0.19821,0.1983,0.19776,0.37921,0.37895,0.37449,0.28792,0.29599,0.30401,0.27983,0.30522,0.27087,0.32991,0.2931,0.29092,0.19738,0.19831,0.19739,0.19875,0.19759,0.19789,0.19705,0.19844,0.19838,0.19728,0.19746,0.19852,0.19757,0.19785,0.19827,0.19755,0.38478,0.

38901,0.38961,0.38434,0.27695,0.29411,0.28896,0.29307,0.28578,0.2897,0.  
.2921,0.29047,0.29138,0.29265,0.19824,0.19857,0.19841,0.1979,0.19637,0.  
.19772,0.19807,0.19773,0.19814,0.19829,0.1975,0.1978,0.19917,0.19731,0.  
.19788,0.19812,0.37288,0.39054,0.38219,0.37468,0.38314,0.3731,0.29124,  
0.31086,0.29148,0.28968,0.28836,0.29365,0.29001,0.29842,0.29165,0.2961  
5,0.19745,0.19814,0.19767,0.19787,0.19757,0.19862,0.19881,0.19801,0.19  
8,0.19826,0.19848,0.19759,0.19811,0.19725,0.19803,0.19797,0.19799,0.37  
672,0.39062,0.37394,0.38181,0.38332,0.38,0.29595,0.28528,0.30892,0.287  
57,0.29667,0.30717,0.28898,0.29108,0.29235,0.28244,0.30242,0.19741,0.1  
9946,0.19732,0.1977,0.19775,0.19714,0.19792,0.19743,0.19859,0.19852,0.  
1984,0.19743,0.19788,0.12141,0.13205,0.12563,0.19698,0.38277,0.38328,0.  
.37149,0.37627,0.38214,0.378,0.38397,0.29529,0.30576,0.29003,0.28686,0.  
.29551,0.28246,0.2669,0.29333,0.29419,0.28786,0.2914,0.19883,0.19823,0.  
.19866,0.19733,0.19718,0.19791,0.19804,0.1985,0.19897,0.19837,0.19853,  
0.12057,0.1108,0.11121,0.12218,0.11521,0.11171,0.19889,0.37541,0.38709  
,0.39417,0.38197,0.38264,0.37381,0.38358,0.27516,0.29287,0.28924,0.290  
69,0.28989,0.29833,0.29121,0.30129,0.28763,0.28812,0.3088,0.19769,0.19  
831,0.1985,0.1992,0.19702,0.19738,0.19809,0.19836,0.19717,0.12696,0.11  
265,0.12984,0.12093,0.12885,0.12472,0.12272,0.10127,0.12144,0.1979,0.3  
8523,0.38519,0.37498,0.38777,0.38695,0.37964,0.3766,0.29681,0.30277,0.  
29152,0.28961,0.28107,0.29446,0.29508,0.28331,0.2908,0.30696,0.28716,0.  
.29338,0.1973,0.19787,0.19853,0.1978,0.19725,0.19783,0.12261,0.12163,0.  
.1197,0.12191,0.12563,0.12199,0.1233,0.13638,0.12153,0.12168,0.11524,0.  
.11939,0.38265,0.38685,0.38444,0.38559,0.37976,0.38127,0.38652,0.28921  
,0.28534,0.29615,0.29011,0.28794,0.29065,0.28578,0.30089,0.29695,0.292  
5,0.28856,0.28319,0.19726,0.19868,0.19894,0.11803,0.13347,0.12167,0.14  
261,0.12209,0.12473,0.13784,0.089965,0.12191,0.12249,0.12963,0.11776,0.  
.10855,0.12864,0.12208,0.39346,0.38499,0.3777,0.37998,0.38723,0.38479,  
0.38568,0.38544,0.37597,0.29235,0.28211,0.27438,0.29079,0.29407,0.2614  
3,0.28795,0.28563,0.28896,0.29153,0.29079,0.12171,0.13594,0.13443,0.12  
281,0.12142,0.11857,0.11666,0.12221,0.15407,0.12187,0.11555,0.11875,0.  
12328,0.1227,0.12225,0.12857,0.14349,0.12942,0.38494,0.38515,0.38695,0.  
.37222,0.38856,0.38547,0.37806,0.39826,0.37985,0.29825,0.29864,0.20981  
,0.21176,0.21417,0.21134,0.21478,0.20951,0.20807,0.21674,0.23254,0.108  
78,0.11958,0.12173,0.1199,0.12177,0.095468,0.11997,0.12601,0.11325,0.1  
2115,0.13295,0.11135,0.12428,0.12168,0.12254,0.11315,0.11623,0.11586,0.  
.38033,0.39663,0.37637,0.37486,0.38049,0.39183,0.38423,0.3876,0.38739,  
0.20759,0.20901,0.2332,0.20691,0.2066,0.21051,0.20622,0.185,0.20017,0.  
22478,0.21425,0.12135,0.098083,0.12301,0.12222,0.12518,0.12227,0.10542  
,0.12035,0.12858,0.12072,0.10872,0.12145,0.13187,0.12377,0.12894,0.130  
87,0.11837,0.13404,0.37882,0.38285,0.38845,0.3906,0.37598,0.37375,0.38  
895,0.21632,0.24119,0.2331,0.2088,0.22365,0.20719,0.22178,0.22745,0.20  
735,0.21261,0.22043,0.20046,0.21646,0.12229,0.13908,0.12179,0.11249,0.  
099454,0.10535,0.10897,0.12191,0.12193,0.12251,0.12303,0.1216,0.12196,  
0.12275,0.12226,0.11755,0.093938,0.12843,0.38347,0.37828,0.38627,0.379  
85,0.37506,0.39224,0.22634,0.22319,0.20803,0.1716,0.199,0.20948,0.1903  
4,0.22382,0.18311,0.19587,0.19958,0.22391,0.2178,0.22869,0.12266,0.117  
96,0.1218,0.11811,0.10794,0.12817,0.11737,0.097896,0.1248,0.11691,0.12  
986,0.10615,0.11571,0.12412,0.11675,0.12183,0.11793,0.10495,0.38487,0.  
39314,0.3839,0.38654,0.38743,0.2016,0.21527,0.21441,0.20994,0.19773,0.  
21246,0.18603,0.18644,0.22853,0.19311,0.21184,0.20934,0.20956,0.20802,  
0.21101,0.12071,0.11448,0.12803,0.12169,0.1221,0.12487,0.13787,0.12388

,0.11576,0.12267,0.11977,0.11401,0.12164,0.11894,0.11995,0.12219,0.13173,0.12798,0.38247,0.38749,0.37577,0.21499,0.21236,0.21169,0.21148,0.21785,0.20601,0.22123,0.18313,0.20963,0.20378,0.20873,0.17789,0.19117,0.21553,0.20665,0.18082,0.20812,0.15465,0.1252,0.12189,0.1218,0.1219,0.12183,0.11595,0.12204,0.13607,0.11908,0.12642,0.11022,0.12181,0.10992,0.092165,0.12476,0.12861,0.12091,0.38797,0.21859,0.22307,0.20295,0.21567,0.24057,0.2143,0.24561,0.2153,0.20652,0.17272,0.20962,0.21735,0.20353,0.19311,0.21126,0.20959,0.19848,0.20139,0.12626,0.12098,0.11658,0.11097,0.1218,0.12211,0.11894,0.11172,0.12117,0.12613,0.12127,0.12145,0.12126,0.11325,0.10574,0.12538,0.12283,0.045866,0.19765,0.21279,0.19758,0.15186,0.23304,0.15255,0.18704,0.22313,0.22806,0.21401,0.20818,0.2247,0.22852,0.1825,0.20355,0.24454,0.20854,0.21247,0.19964,0.12766,0.12332,0.12301,0.12733,0.12369,0.13663,0.12329,0.10748,0.1213,0.10294,0.12174,0.1216,0.1296,0.1175,0.12208,0.1256,0.12182,0.046163,0.23189,0.25062,0.22138,0.2106,0.16961,0.21661,0.21588,0.21522,0.22072,0.217,0.23899,0.20169,0.20981,0.20481,0.20773,0.22227,0.20805,0.20097,0.12188,0.11449,0.11367,0.1371,0.12419,0.13669,0.12211,0.12937,0.12291,0.12132,0.11543,0.12187,0.12438,0.10802,0.12153,0.12073,0.11474,0.11714,0.045536,0.2272,0.22004,0.15197,0.19832,0.2255,0.2047,0.22127,0.21372,0.21603,0.21282,0.20513,0.17978,0.20756,0.20678,0.21217,0.19397,0.19516,0.22418,0.11404,0.1215,0.14754,0.12091,0.13158,0.12203,0.12366,0.12127,0.11154,0.13076,0.12176,0.11379,0.12639,0.1197,0.12152,0.12274,0.1454,0.045969,0.045578,0.046106,0.2843,0.20229,0.21425,0.21682,0.24967,0.22659,0.21313,0.21069,0.19014,0.20913,0.18835,0.19527,0.21745,0.20988,0.20898,0.11361,0.12163,0.12179,0.1372,0.097121,0.109,0.13042,0.1266,0.1057,0.11911,0.12342,0.12436,0.11064,0.13389,0.069344,0.10984,0.13603,0.12552,0.045883,0.046355,0.046278,0.045731,0.21034,0.24199,0.24054,0.20213,0.2134,0.17932,0.20332,0.19749,0.21944,0.17089,0.20877,0.1945,0.11282,0.12166,0.17073,0.117,0.11464,0.11916,0.11764,0.12134,0.13889,0.12369,0.12229,0.13347,0.11587,0.12178,0.1601,0.12751,0.12197,0.12657,0.12145,0.12732,0.046296,0.045928,0.046017,0.046382,0.046327,0.046483,0.24071,0.24351,0.21374,0.21214,0.28963,0.18402,0.22225,0.2148,0.13999,0.12382,0.13251,0.1247,0.12454,0.12589,0.1422,0.12218,0.11948,0.12505,0.12235,0.13196,0.12342,0.11782,0.11011,0.11565,0.11241,0.12198,0.1215,0.11485,0.12183,0.12172,0.11246,0.045362,0.046009,0.046361,0.046345,0.045768,0.046012,0.21566,0.21281,0.2352,0.22394,0.21935,0.045087,0.046094,0.11898,0.12417,0.10759,0.12147,0.1218,0.12194,0.12185,0.12162,0.12196,0.12702,0.1218,0.12504,0.12172,0.15319,0.14572,0.11685,0.12634,0.1217,0.12637,0.12163,0.12127,0.045418,0.045338,0.045297,0.046571,0.046556,0.044759,0.045248,0.046137,0.046206,0.045804,0.20964,0.23456,0.045572,0.045947,0.045595,0.046068,0.12831,0.1045,0.12911,0.11599,0.11581,0.13556,0.12222,0.12178,0.12098,0.12178,0.12055,0.13019,0.12185,0.1218,0.13028,0.12466,0.12119,0.12553,0.11408,0.045603,0.045741,0.045861,0.045541,0.045201,0.046024,0.045847,0.045585,0.046099,0.045959,0.045934,0.046526,0.04596,0.045684,0.045751,0.045426,0.045754,0.12244,0.12132,0.1216,0.10987,0.12744,0.1093,0.11706,0.1223,0.1231,0.13331,0.12422,0.12201,0.13235,0.12975,0.12598,0.11909,0.045799,0.046142,0.045923,0.045419,0.045633,0.04623,0.045791,0.045459,0.045974,0.046111,0.045255,0.045692,0.045898,0.04565,0.046121,0.045394,0.045681,0.045389,0.045328,0.10868,0.1225,0.1385,0.12246,0.1102,0.12232,0.12683,0.12457,0.12169,0.12298,0.12846,0.12159,0.1447,0.045679,0.045678,0.046025,0.045419,0.045703,0.045827,0.045416,0.045425,0.045716,0.045762,0.045881,0.045632,0.045976,0.04

6129,0.04583,0.04614,0.045549,0.045571,0.045907,0.045662,0.045786,0.12  
185,0.10817,0.11925,0.11962,0.11969,0.09147,0.1221,0.12202,0.12016,0.0  
45865,0.045821,0.045897,0.046077,0.045794,0.045579,0.045743,0.045729,0  
.046158,0.045731,0.045844,0.046207,0.045467,0.045626,0.046568,0.04582,  
0.045889,0.046167,0.045543,0.045909,0.046013,0.045446,0.045988,0.04589  
4,0.045326,0.10686,0.12475,0.13066,0.10025,0.046254,0.045709,0.045803,  
0.046639,0.046119,0.04638,0.045503,0.045209,0.04579,0.045803,0.045422,  
0.046453,0.04523,0.046031,0.045921,0.046234,0.046257,0.045865,0.045278  
,0.045308,0.046256,0.045662,0.045156,0.046297,0.046251,0.045126,0.0454  
3,0.045849,0.045746,0.046575,0.046101,0.0458,0.045683,0.046059,0.04631  
4,0.046029,0.045901,0.045589,0.046171,0.046268,0.046719,0.045269,0.045  
699,0.045872,0.045879,0.045556,0.045385,0.046451,0.045869,0.045836,0.0  
45678,0.045797,0.045546,0.045821,0.046067,0.045877,0.045412,0.045818,0  
.045213,0.04566,0.04587,0.045481,0.046124,0.045414,0.046354,0.045364,0  
.046108,0.046332,0.045853,0.045608,0.045633,0.045944,0.046428,0.04617,  
0.045572,0.045406,0.045719,0.046055,0.046267,0.045237,0.045674,0.04586  
6,0.045759,0.046055,0.045814,0.045574,0.045918,0.046276,0.045636,0.046  
722,0.04548,0.045713,0.045921,0.045815,0.045441,0.04625,0.045805,0.045  
878,0.045687,0.046305,0.046094,0.045201,0.046131,0.046249,0.045174,0.0  
46492,0.045437,0.045591,0.046595,0.045368,0.045913,0.046312,0.046121,0  
.044958,0.046297,0.045288,0.046057,0.045878,0.045429,0.045719,0.045459  
,0.045557,0.046394,0.046162,0.045295,0.045793,0.046329,0.045829,0.0461  
94,0.045757,0.045863,0.04645,0.046379,0.045904,0.045714,0.045134,0.046  
339,0.045652,0.046647,0.045925,0.046003,0.045499,0.045743,0.046499,0.0  
45973,0.045659,0.044698,0.046131,0.045263,0.045838,0.045724,0.045644,0  
.045835,0.04596,0.045906,0.04564,0.045061,0.04558,0.045847,0.045985,0.  
045971,0.046646,0.046238,0.046542,0.045584,0.045771,0.045751,0.046959,  
0.045501,0.045749,0.045796,0.045879,0.045566,0.045068,0.046156,0.04586  
,0.045006,0.046025,0.045494,0.045391,0.045894,0.046465,0.046049,0.0458  
34,0.045664,0.046268,0.045072,0.045803,0.046153,0.045534,0.04551,0.046  
301,0.046324,0.045784,0.045693  
0.19979,0.19929,0.19991,0.19961,0.19963,0.19923,0.19977,0.20066,0.1978  
6,0.19966,0.20008,0.19962,0.19903,0.1996,0.19812,0.19971,0.19921,0.199  
46,0.19994,0.20022,0.29417,0.27747,0.28727,0.28544,0.19925,0.19949,0.2  
002,0.19972,0.19908,0.19886,0.19988,0.19888,0.19902,0.20016,0.2,0.1994  
2,0.20012,0.19863,0.20044,0.3778,0.2857,0.28813,0.28526,0.29307,0.2565  
4,0.28796,0.19965,0.19993,0.20012,0.19845,0.19931,0.19889,0.20014,0.19  
96,0.19873,0.19949,0.19874,0.19977,0.19896,0.19974,0.20013,0.37244,0.3  
6816,0.26547,0.27824,0.28825,0.29058,0.28651,0.30162,0.30038,0.27118,0  
.2006,0.19945,0.19852,0.20007,0.1995,0.20053,0.19913,0.19949,0.19935,0  
.19955,0.19979,0.19838,0.19962,0.1996,0.19932,0.37171,0.37275,0.36802,  
0.2861,0.29291,0.29876,0.27684,0.29921,0.2676,0.32241,0.29103,0.28928,  
0.19923,0.20006,0.19969,0.20056,0.19947,0.19969,0.19863,0.20032,0.2000  
3,0.19887,0.19899,0.19999,0.19933,0.19945,0.19942,0.19913,0.37717,0.38  
587,0.38594,0.37327,0.27477,0.28946,0.28704,0.2914,0.28418,0.28677,0.2  
8791,0.28677,0.2873,0.28936,0.19981,0.19932,0.20016,0.19907,0.19781,0.  
19958,0.19945,0.19951,0.19947,0.20016,0.19899,0.19962,0.20069,0.19906,  
0.19941,0.19972,0.36271,0.38359,0.37057,0.37095,0.37745,0.36261,0.2869  
,0.30476,0.28756,0.28691,0.28596,0.29171,0.28614,0.29571,0.28965,0.292  
16,0.19978,0.19964,0.19972,0.19989,0.1991,0.20024,0.19982,0.19987,0.19  
968,0.19942,0.19981,0.19982,0.19962,0.19859,0.19931,0.19951,0.1992,0.3  
6626,0.38408,0.36878,0.37418,0.37607,0.37424,0.29143,0.28302,0.30439,0

.28411,0.29455,0.30386,0.2844,0.28829,0.28894,0.27904,0.29786,0.19927,  
0.20061,0.1991,0.19956,0.19944,0.19866,0.19917,0.19898,0.20028,0.2,0.1  
9962,0.19907,0.19969,0.121,0.13181,0.1256,0.19867,0.37512,0.37927,0.36  
73,0.37174,0.37224,0.37099,0.37572,0.291,0.30105,0.28584,0.28398,0.293  
49,0.27806,0.2662,0.2904,0.29267,0.28715,0.2887,0.20028,0.1999,0.19994  
,0.19878,0.1986,0.19925,0.1995,0.20022,0.20073,0.20008,0.2,0.12014,0.1  
1052,0.11059,0.12182,0.11481,0.11129,0.20013,0.36839,0.38218,0.38164,0  
.36909,0.37218,0.36493,0.37258,0.27393,0.28755,0.28749,0.28654,0.28874  
,0.29383,0.28777,0.29756,0.28714,0.28383,0.30413,0.19908,0.19966,0.200  
04,0.20098,0.19882,0.19929,0.20005,0.20012,0.19888,0.12706,0.11211,0.1  
2988,0.12099,0.12867,0.12466,0.12242,0.10058,0.12133,0.19972,0.37642,0  
.37841,0.36889,0.381,0.37498,0.37077,0.36963,0.29295,0.29927,0.28692,0  
.28677,0.27935,0.29008,0.29278,0.2809,0.28607,0.30249,0.28545,0.29185,  
0.19884,0.19953,0.20008,0.1997,0.19904,0.19924,0.1224,0.1216,0.11956,0  
.12154,0.12539,0.12189,0.12315,0.13641,0.12149,0.1216,0.115,0.11928,0.  
37425,0.38063,0.37421,0.37691,0.36747,0.37173,0.37796,0.28762,0.28223,  
0.2943,0.28472,0.28357,0.28745,0.28328,0.29861,0.29355,0.28701,0.28635  
,0.28035,0.19874,0.19998,0.2005,0.11774,0.13393,0.12155,0.14302,0.1219  
7,0.12473,0.13804,0.088994,0.12178,0.12214,0.12956,0.11766,0.10796,0.1  
2869,0.12195,0.38513,0.37985,0.37177,0.3717,0.38046,0.37958,0.37495,0.  
37613,0.36654,0.28883,0.2791,0.27253,0.28721,0.29279,0.26047,0.28638,0  
.28273,0.28767,0.28885,0.28634,0.12157,0.13624,0.13462,0.12259,0.12131  
,0.11842,0.11627,0.12187,0.15459,0.1214,0.1151,0.11853,0.12295,0.12275  
,0.12223,0.12867,0.14377,0.12943,0.37788,0.37957,0.3761,0.36935,0.3831  
,0.38034,0.36958,0.38534,0.37594,0.29624,0.29778,0.20768,0.20878,0.210  
69,0.20698,0.21206,0.20613,0.20497,0.21364,0.22688,0.10817,0.11932,0.1  
2161,0.11974,0.12158,0.094485,0.11966,0.12618,0.11287,0.121,0.13314,0.  
1109,0.12415,0.12164,0.12255,0.11286,0.1158,0.1155,0.37247,0.39093,0.3  
7286,0.36743,0.37411,0.38528,0.3799,0.38249,0.38057,0.2027,0.20694,0.2  
2977,0.2022,0.20458,0.20778,0.20519,0.18314,0.19728,0.22245,0.2109,0.1  
2135,0.097427,0.12315,0.12205,0.12484,0.12198,0.1049,0.12029,0.12884,0  
.12019,0.10824,0.12114,0.13168,0.12348,0.12912,0.13113,0.11842,0.13439  
,0.36804,0.37206,0.37878,0.38506,0.37188,0.36534,0.38523,0.21225,0.235  
74,0.22991,0.20603,0.22158,0.20469,0.21886,0.2247,0.20409,0.21023,0.21  
808,0.19708,0.21526,0.12206,0.13966,0.12155,0.11222,0.098995,0.10478,0  
.1086,0.12173,0.12184,0.12206,0.12288,0.12154,0.12194,0.12261,0.12197,  
0.11735,0.093019,0.12823,0.3769,0.37278,0.37986,0.37386,0.36894,0.3839  
7,0.22234,0.2194,0.20274,0.16776,0.19347,0.20747,0.18965,0.22039,0.181  
47,0.19331,0.19685,0.22159,0.21538,0.22473,0.1225,0.11791,0.12154,0.11  
774,0.1075,0.12785,0.1169,0.097272,0.1248,0.11659,0.12993,0.10587,0.11  
513,0.12418,0.11654,0.12152,0.11763,0.10438,0.38055,0.38241,0.37903,0.  
37822,0.38005,0.19665,0.21139,0.21026,0.20585,0.19333,0.20766,0.18465,  
0.18438,0.22525,0.19239,0.20804,0.20685,0.20483,0.20606,0.20933,0.1205  
3,0.11417,0.12797,0.12173,0.12212,0.12475,0.13802,0.12359,0.11556,0.12  
257,0.11953,0.11376,0.12143,0.1185,0.11959,0.12198,0.13172,0.12787,0.3  
736,0.3785,0.37068,0.20688,0.20606,0.20855,0.20665,0.21363,0.20223,0.2  
1659,0.17795,0.20785,0.20168,0.20624,0.1758,0.18978,0.21322,0.20569,0.  
1795,0.20603,0.15522,0.12519,0.12167,0.12166,0.12192,0.12172,0.1159,0.  
12171,0.13621,0.11899,0.12651,0.10985,0.12162,0.10946,0.091146,0.12482  
,0.12866,0.12067,0.37684,0.21399,0.21847,0.19917,0.21106,0.23589,0.210  
39,0.23994,0.21157,0.20054,0.17087,0.20713,0.21412,0.20129,0.18961,0.2  
0778,0.20528,0.19581,0.19775,0.12637,0.12076,0.11613,0.11051,0.12152,0

.12188,0.11866,0.11154,0.1208,0.12627,0.12121,0.1212,0.12116,0.11277,0.10528,0.12532,0.12262,0.043784,0.19136,0.20846,0.19297,0.14836,0.22703,0.14919,0.18237,0.21937,0.22402,0.21233,0.20507,0.223,0.22311,0.17947,0.20043,0.23991,0.20585,0.20925,0.19621,0.12748,0.12321,0.12283,0.12717,0.12345,0.13671,0.12346,0.10684,0.12114,0.10243,0.12164,0.12144,0.1298,0.11696,0.12175,0.12564,0.12165,0.044239,0.22939,0.24654,0.2177,0.20549,0.16801,0.20982,0.21214,0.20805,0.21585,0.21111,0.23506,0.1997,0.20839,0.20403,0.20539,0.21954,0.20447,0.19957,0.12166,0.11411,0.11346,0.13729,0.12419,0.13672,0.12199,0.12943,0.1227,0.12107,0.11505,0.12155,0.12415,0.10769,0.12158,0.12062,0.11446,0.11698,0.043905,0.22417,0.21738,0.14935,0.19307,0.22033,0.1999,0.21771,0.20927,0.21344,0.20898,0.20075,0.17769,0.20413,0.20365,0.20873,0.19125,0.19383,0.22232,0.11383,0.1214,0.14802,0.12049,0.13157,0.12205,0.12353,0.12102,0.11103,0.13082,0.12172,0.1131,0.12608,0.11939,0.12134,0.12261,0.1458,0.043807,0.04355,0.044339,0.28184,0.19733,0.20788,0.21397,0.24593,0.22303,0.20835,0.20717,0.18651,0.20594,0.18598,0.19335,0.216,0.20765,0.20705,0.11347,0.12162,0.12153,0.13744,0.096515,0.10858,0.13058,0.1262,0.10503,0.11904,0.12336,0.12433,0.11046,0.13403,0.068131,0.10922,0.13609,0.1257,0.043772,0.04446,0.044331,0.043908,0.20511,0.23909,0.23681,0.19704,0.20757,0.17591,0.19851,0.19242,0.21358,0.16946,0.20644,0.19227,0.11243,0.12137,0.1718,0.11688,0.1142,0.11866,0.11738,0.12137,0.13946,0.12357,0.12206,0.13378,0.11568,0.12165,0.16082,0.12741,0.12172,0.1266,0.12121,0.12726,0.044388,0.044033,0.04397,0.044449,0.044262,0.044595,0.23819,0.24019,0.20934,0.20847,0.28328,0.18194,0.219,0.21061,0.14046,0.12363,0.13301,0.12475,0.12434,0.12575,0.14255,0.1221,0.11932,0.12513,0.12209,0.13216,0.1233,0.11753,0.10988,0.11527,0.11217,0.12182,0.12162,0.11457,0.12162,0.12161,0.11188,0.043753,0.044076,0.044053,0.044483,0.043945,0.044162,0.20979,0.20968,0.23065,0.21933,0.21299,0.043196,0.043933,0.11872,0.12414,0.10702,0.12151,0.12166,0.12161,0.12173,0.12148,0.12182,0.12705,0.12154,0.1248,0.12142,0.15365,0.1461,0.11664,0.12625,0.12138,0.12604,0.12134,0.12111,0.04324,0.043424,0.043565,0.044646,0.044431,0.042644,0.043504,0.044111,0.044381,0.043927,0.20503,0.22965,0.043773,0.044107,0.043659,0.044338,0.1281,0.10408,0.12915,0.11568,0.11548,0.13572,0.12192,0.12153,0.12085,0.12182,0.12065,0.13034,0.12165,0.12156,0.13032,0.12464,0.12093,0.12535,0.11379,0.043829,0.04411,0.043498,0.043413,0.043361,0.044258,0.044098,0.043471,0.044179,0.044024,0.044176,0.044497,0.044102,0.043882,0.043798,0.043329,0.043915,0.12254,0.12118,0.12134,0.10958,0.12747,0.10875,0.11704,0.12199,0.1229,0.13324,0.1239,0.12182,0.13225,0.12956,0.12595,0.11879,0.043941,0.044222,0.043944,0.043439,0.043617,0.044353,0.044075,0.04339,0.044119,0.044403,0.043416,0.043951,0.043802,0.044048,0.043988,0.043764,0.043902,0.043555,0.043983,0.10806,0.1221,0.13889,0.12225,0.10971,0.12198,0.12681,0.12466,0.12146,0.12283,0.12846,0.12125,0.14479,0.044191,0.043465,0.043893,0.043523,0.043898,0.043675,0.04337,0.043539,0.04383,0.043845,0.044217,0.043585,0.044221,0.044176,0.043858,0.044081,0.043492,0.043451,0.043964,0.043733,0.044054,0.12204,0.1077,0.11913,0.11937,0.11955,0.09048,0.12196,0.12179,0.12005,0.044056,0.043798,0.043808,0.044221,0.043666,0.043604,0.043701,0.04361,0.04416,0.043914,0.043967,0.044031,0.043177,0.043568,0.044651,0.044116,0.043858,0.044122,0.043165,0.043872,0.043899,0.043563,0.043968,0.04389,0.043489,0.10624,0.12465,0.13052,0.099692,0.044081,0.04354,0.043611,0.044596,0.044424,0.044284,0.04368,0.043442,0.043979,0.043729,0.043283,0.044681,0.043674,0.044043,0.044225,0.044253,0.044226,0.043826,0.0432

84,0.04335,0.044261,0.043959,0.043057,0.044442,0.044402,0.043254,0.043  
554,0.043669,0.043751,0.044743,0.044098,0.043841,0.0439,0.044225,0.044  
187,0.043958,0.044161,0.043596,0.044162,0.043851,0.044598,0.043271,0.0  
44024,0.043803,0.043687,0.043648,0.043438,0.044602,0.043929,0.044008,0  
.043583,0.043721,0.043598,0.044126,0.044313,0.043817,0.043416,0.043862  
,0.043297,0.043856,0.043942,0.043649,0.044345,0.043457,0.0444,0.043444  
,0.044197,0.044863,0.043786,0.04371,0.04397,0.044132,0.044543,0.04415,  
0.043818,0.043748,0.044115,0.044008,0.044346,0.043076,0.043834,0.04382  
6,0.044118,0.043925,0.043913,0.043711,0.043892,0.044336,0.043903,0.044  
623,0.043566,0.043938,0.043998,0.043644,0.043684,0.043639,0.043875,0.0  
43866,0.043899,0.044547,0.044228,0.043355,0.043967,0.044541,0.043635,0  
.044632,0.043556,0.043815,0.044756,0.043699,0.043993,0.044607,0.044256  
,0.043255,0.044143,0.043447,0.044115,0.043767,0.043669,0.04378,0.04358  
4,0.043439,0.044472,0.044193,0.043384,0.0442,0.044136,0.04379,0.043968  
,0.043845,0.043626,0.044512,0.044347,0.044181,0.043797,0.042933,0.0443  
19,0.043848,0.04463,0.044218,0.04408,0.043552,0.044025,0.044468,0.0441  
28,0.043827,0.042887,0.044326,0.043209,0.043837,0.043981,0.043471,0.04  
4016,0.044033,0.04388,0.043686,0.04314,0.043455,0.043764,0.044054,0.04  
4046,0.044677,0.044094,0.044967,0.043552,0.043788,0.043933,0.045107,0.  
043617,0.044065,0.043809,0.044015,0.043655,0.043177,0.044258,0.043789,  
0.043003,0.044155,0.043355,0.043238,0.044078,0.044565,0.044246,0.04385  
3,0.043571,0.044319,0.043021,0.043886,0.044232,0.043698,0.043487,0.044  
304,0.044462,0.043903,0.043514  
0.20123,0.20053,0.20146,0.20066,0.20156,0.20084,0.20097,0.20207,0.1998  
3,0.20055,0.20112,0.20074,0.20047,0.20093,0.19995,0.20094,0.20077,0.20  
084,0.20131,0.20139,0.29185,0.2756,0.28621,0.28268,0.20093,0.20109,0.2  
017,0.20113,0.20079,0.20024,0.20136,0.2003,0.20024,0.20156,0.2012,0.20  
092,0.2012,0.19987,0.20157,0.37261,0.28505,0.28662,0.28443,0.29197,0.2  
5534,0.28543,0.20134,0.20087,0.20127,0.19975,0.20079,0.19982,0.20167,0  
.20081,0.1999,0.20098,0.2001,0.2009,0.20036,0.20127,0.20148,0.36753,0.  
36305,0.26531,0.27764,0.28463,0.28781,0.28366,0.30047,0.29719,0.26994,  
0.20194,0.20074,0.20026,0.20135,0.20081,0.20177,0.20059,0.2011,0.20076  
,0.20088,0.20114,0.20019,0.20079,0.20075,0.20092,0.36225,0.37057,0.366  
84,0.28352,0.29099,0.29719,0.27537,0.2977,0.26631,0.3142,0.28915,0.286  
86,0.20103,0.20129,0.20087,0.20162,0.20082,0.20106,0.20013,0.20141,0.2  
0127,0.20044,0.20102,0.20112,0.20066,0.20093,0.20089,0.20092,0.37231,0  
.37591,0.37681,0.36513,0.27111,0.28736,0.2845,0.28907,0.28146,0.28437,  
0.28521,0.28695,0.28206,0.28699,0.20112,0.20084,0.20149,0.20053,0.1996  
,0.20104,0.20083,0.20091,0.20091,0.20152,0.20036,0.20112,0.2019,0.2002  
8,0.20058,0.2009,0.35696,0.38339,0.36682,0.36438,0.37175,0.35695,0.285  
16,0.30372,0.28444,0.28394,0.2852,0.2921,0.28365,0.29228,0.28819,0.288  
25,0.20094,0.20142,0.20107,0.20166,0.20035,0.20141,0.20064,0.20129,0.2  
0121,0.20055,0.20157,0.20094,0.2007,0.20023,0.20083,0.20094,0.20073,0.  
3571,0.37602,0.36237,0.37403,0.372,0.37147,0.29007,0.2824,0.30055,0.28  
338,0.29358,0.3021,0.28174,0.28543,0.28842,0.27734,0.29492,0.2007,0.20  
177,0.20059,0.20067,0.20093,0.20038,0.20063,0.20012,0.20142,0.20135,0.  
20073,0.20061,0.20106,0.12086,0.13204,0.12555,0.20025,0.37161,0.37198,  
0.36304,0.36851,0.36619,0.36469,0.36915,0.28865,0.29891,0.2826,0.28437  
,0.29227,0.27651,0.26505,0.28717,0.29187,0.28415,0.28661,0.20185,0.201  
29,0.20116,0.2006,0.20005,0.20059,0.20126,0.20139,0.20169,0.20114,0.20  
115,0.12029,0.1104,0.11042,0.12176,0.11486,0.1111,0.20127,0.36353,0.37  
368,0.37477,0.36141,0.37017,0.35753,0.36761,0.27297,0.28485,0.28689,0.



28686,0.28686,0.29309,0.28487,0.29582,0.28556,0.28288,0.3009,0.19991,0.20118,0.20131,0.20223,0.2006,0.20063,0.20152,0.20148,0.20075,0.12733,0.11192,0.13019,0.12084,0.12888,0.12499,0.12231,0.10033,0.12124,0.2011,0.37046,0.3698,0.36145,0.37788,0.37282,0.36093,0.36488,0.29061,0.29677,0.28555,0.28441,0.27859,0.28845,0.28936,0.28068,0.2828,0.30106,0.28391,0.28791,0.20072,0.20119,0.20161,0.20108,0.20023,0.20042,0.12247,0.12125,0.11945,0.12167,0.12552,0.12215,0.12331,0.13677,0.12168,0.12164,0.11495,0.11932,0.36941,0.37648,0.36808,0.37222,0.36314,0.37021,0.37633,0.28438,0.28122,0.29436,0.28369,0.28225,0.28787,0.28183,0.29906,0.2929,0.28255,0.2863,0.27736,0.2,0.20121,0.20187,0.11765,0.13432,0.12142,0.14326,0.12176,0.12463,0.13835,0.088494,0.12182,0.12235,0.12962,0.11761,0.10751,0.1288,0.12177,0.376,0.36765,0.36926,0.36459,0.3759,0.37091,0.36947,0.37472,0.36317,0.28474,0.27814,0.27194,0.28623,0.29003,0.25959,0.28535,0.27967,0.2865,0.28617,0.28416,0.12171,0.13626,0.1349,0.12261,0.12164,0.11831,0.11601,0.12229,0.15503,0.1215,0.11513,0.11846,0.12287,0.1227,0.12199,0.12893,0.14389,0.12964,0.37462,0.37646,0.36541,0.36269,0.37325,0.37936,0.36502,0.37851,0.36954,0.29446,0.29442,0.20551,0.20634,0.20788,0.20551,0.21089,0.20466,0.20237,0.21206,0.225,0.10797,0.11927,0.12153,0.11956,0.12169,0.09405,0.11949,0.12629,0.11281,0.12087,0.13332,0.11076,0.12421,0.12161,0.1229,0.1128,0.11575,0.11527,0.36773,0.38296,0.36767,0.3643,0.36942,0.38274,0.37254,0.3797,0.37757,0.19882,0.20381,0.22724,0.20112,0.20232,0.20508,0.20346,0.18104,0.19726,0.22195,0.21051,0.12132,0.096873,0.12316,0.12222,0.12497,0.12181,0.10434,0.11998,0.12903,0.12026,0.10799,0.12127,0.1319,0.12361,0.12931,0.13149,0.11845,0.13481,0.36069,0.37082,0.37636,0.38215,0.36646,0.35885,0.37813,0.20645,0.23203,0.22816,0.20271,0.21988,0.20016,0.21719,0.22343,0.20147,0.20789,0.21681,0.19676,0.21289,0.12209,0.14001,0.12169,0.11193,0.098456,0.10457,0.10831,0.12201,0.12201,0.1221,0.12299,0.12141,0.122,0.12249,0.12211,0.11734,0.09237,0.12854,0.37214,0.3663,0.37183,0.36675,0.36289,0.37585,0.21932,0.21459,0.19951,0.16421,0.19063,0.20532,0.18777,0.21787,0.18097,0.19253,0.19579,0.2199,0.21247,0.22257,0.12258,0.11802,0.12173,0.11755,0.10715,0.12802,0.11686,0.096928,0.12479,0.11642,0.13026,0.10562,0.11526,0.1243,0.11618,0.12146,0.11752,0.10395,0.37624,0.37523,0.37296,0.37621,0.37873,0.19458,0.20949,0.20764,0.20149,0.19431,0.20528,0.18283,0.18352,0.22495,0.19045,0.20692,0.20377,0.20293,0.20348,0.20734,0.12042,0.11411,0.12816,0.12149,0.12207,0.12483,0.13824,0.12359,0.1156,0.12255,0.11954,0.11354,0.12139,0.1186,0.11968,0.12198,0.13174,0.12801,0.36515,0.37029,0.36578,0.20432,0.20324,0.20361,0.20272,0.21034,0.19964,0.21546,0.17639,0.20725,0.19947,0.20412,0.173,0.18828,0.21082,0.20508,0.17799,0.20327,0.15591,0.12553,0.12166,0.12179,0.12193,0.12166,0.11577,0.12166,0.13666,0.11887,0.12697,0.10984,0.12172,0.10932,0.090849,0.12459,0.12888,0.12065,0.37284,0.21161,0.21349,0.19822,0.20638,0.23343,0.20662,0.23651,0.20696,0.1948,0.16999,0.20434,0.21245,0.20086,0.18905,0.20561,0.20264,0.19418,0.19621,0.12635,0.12058,0.11628,0.11031,0.1215,0.12188,0.11857,0.1114,0.12103,0.12617,0.12113,0.12126,0.12132,0.11285,0.10525,0.1254,0.12255,0.042629,0.18896,0.20653,0.19146,0.14545,0.22217,0.14612,0.17772,0.21798,0.22239,0.2072,0.20227,0.22237,0.2201,0.17845,0.19782,0.23734,0.20331,0.20682,0.19527,0.12746,0.12354,0.12276,0.12725,0.12357,0.13733,0.12378,0.1066,0.12137,0.10202,0.12152,0.12151,0.1298,0.11699,0.12194,0.12566,0.12162,0.042881,0.22629,0.24295,0.21412,0.20112,0.16533,0.20739,0.20721,0.20399,0.21077,0.20919,0.23275,0.19857,0.20824,0.20188,0.20365,0.21721,0.20226,0.1977,0.12149,

0.11395,0.11323,0.13761,0.12421,0.13696,0.12184,0.12955,0.12291,0.1212  
1,0.11498,0.12148,0.12416,0.10755,0.12171,0.12061,0.11457,0.1168,0.042  
618,0.22268,0.21423,0.14609,0.18836,0.217,0.1974,0.21464,0.20455,0.206  
53,0.20624,0.19871,0.17678,0.2019,0.20243,0.20801,0.18985,0.19218,0.21  
915,0.11363,0.12154,0.14845,0.12067,0.13182,0.12205,0.12322,0.12098,0.  
11089,0.13089,0.12174,0.11307,0.12609,0.11932,0.1215,0.1226,0.14636,0.  
042736,0.042289,0.043168,0.277,0.19353,0.20434,0.20927,0.24403,0.22267  
,0.20595,0.20448,0.18325,0.20382,0.18477,0.19074,0.21471,0.20668,0.204  
11,0.11325,0.12164,0.12191,0.13786,0.095915,0.10818,0.13074,0.1265,0.1  
0468,0.11895,0.12352,0.12451,0.11037,0.13422,0.067227,0.10908,0.13628,  
0.12573,0.042202,0.043051,0.042951,0.042509,0.2019,0.23545,0.23147,0.1  
9321,0.20406,0.17384,0.19234,0.18677,0.20839,0.16737,0.2045,0.19131,0.  
11223,0.1215,0.17264,0.11679,0.11392,0.11873,0.11746,0.12151,0.13979,0.  
.12364,0.12177,0.13377,0.11583,0.12181,0.16145,0.1272,0.12183,0.12664,  
0.12125,0.12743,0.04321,0.042421,0.042757,0.043043,0.043032,0.043217,0.  
.23336,0.23651,0.20579,0.20357,0.27908,0.18046,0.21391,0.2075,0.14077,  
0.12379,0.13324,0.12486,0.12414,0.12615,0.14305,0.12217,0.11944,0.1254  
5,0.12218,0.13259,0.1233,0.11741,0.10965,0.11528,0.11212,0.12189,0.121  
8,0.11446,0.12188,0.12142,0.11174,0.042522,0.042529,0.042573,0.043159,  
0.042676,0.042458,0.20592,0.20594,0.22614,0.21742,0.2112,0.04228,0.042  
847,0.11894,0.12449,0.10705,0.12156,0.12165,0.1216,0.12158,0.12145,0.1  
2201,0.12706,0.12141,0.12504,0.12124,0.15439,0.14635,0.11661,0.12651,0.  
.12123,0.12606,0.12158,0.12103,0.041865,0.042427,0.042122,0.043455,0.0  
43545,0.041331,0.042425,0.042822,0.043252,0.042743,0.19976,0.22745,0.0  
42226,0.042713,0.041791,0.04303,0.12823,0.10393,0.12917,0.11571,0.1153  
5,0.13589,0.12182,0.12144,0.12097,0.12182,0.12062,0.13052,0.12166,0.12  
149,0.13044,0.12478,0.12112,0.12553,0.11376,0.042477,0.042672,0.042324  
,0.042379,0.042125,0.042754,0.042632,0.042318,0.043113,0.043089,0.0427  
84,0.043133,0.042932,0.042673,0.042543,0.04175,0.042579,0.12259,0.1212  
4,0.1214,0.10953,0.12742,0.10844,0.11688,0.12205,0.12304,0.13348,0.123  
85,0.12169,0.13272,0.12986,0.12609,0.11894,0.042713,0.042706,0.042603,  
0.042169,0.042566,0.043163,0.04292,0.042212,0.043106,0.042775,0.041498  
,0.042705,0.042263,0.042405,0.042789,0.042389,0.042728,0.042315,0.0424  
78,0.10802,0.12219,0.13937,0.12246,0.10957,0.12187,0.12672,0.12466,0.1  
2157,0.12281,0.1285,0.1215,0.14541,0.04285,0.042147,0.042663,0.042002,  
0.042693,0.042153,0.042044,0.042345,0.042759,0.042337,0.042894,0.04241  
9,0.042907,0.042939,0.042736,0.042771,0.042348,0.042295,0.042764,0.042  
635,0.042647,0.12204,0.10747,0.11889,0.11932,0.11942,0.089973,0.12198,  
0.12188,0.12023,0.042408,0.042478,0.042492,0.042774,0.042347,0.042327,  
0.042324,0.042164,0.042683,0.042935,0.042658,0.042566,0.041773,0.04216  
8,0.043044,0.042778,0.042549,0.042644,0.042027,0.04279,0.042718,0.0423  
97,0.042681,0.042513,0.042345,0.106,0.12458,0.13069,0.099107,0.042808,  
0.042292,0.042185,0.043127,0.04302,0.043022,0.042474,0.04231,0.042845,  
0.042351,0.041999,0.04326,0.042383,0.042698,0.042832,0.042878,0.043025  
,0.042649,0.042392,0.042178,0.042884,0.042532,0.042217,0.043255,0.0431  
69,0.042081,0.042106,0.042474,0.042306,0.043275,0.042588,0.042358,0.04  
2503,0.043067,0.042742,0.04275,0.042464,0.042818,0.043069,0.042461,0.0  
42941,0.042179,0.042715,0.042427,0.042359,0.042448,0.042138,0.04315,0.  
042642,0.042782,0.042243,0.042529,0.04216,0.04268,0.042879,0.042366,0.  
042264,0.042466,0.042041,0.04226,0.042829,0.04242,0.043008,0.042382,0.  
043304,0.042139,0.042756,0.043304,0.04243,0.042465,0.042428,0.042639,0.  
.043321,0.042982,0.042243,0.042689,0.043249,0.042811,0.043012,0.042183

,0.042568,0.042473,0.042432,0.042527,0.042288,0.04278,0.04276,0.043087  
,0.042761,0.043176,0.041972,0.042494,0.042752,0.042325,0.042232,0.0421  
04,0.042391,0.04222,0.042948,0.042924,0.042798,0.041935,0.042463,0.042  
789,0.042694,0.04354,0.042203,0.042654,0.043184,0.042403,0.042544,0.04  
3271,0.042936,0.041766,0.042988,0.042004,0.042477,0.042306,0.042318,0.  
042538,0.042552,0.041952,0.042884,0.042847,0.042083,0.043032,0.042628,  
0.042625,0.042548,0.042385,0.04267,0.043265,0.042669,0.042627,0.042957  
,0.041667,0.042852,0.04243,0.043336,0.042739,0.042901,0.042458,0.04256  
,0.043355,0.0429,0.042371,0.041427,0.042538,0.042184,0.04264,0.042601,  
0.042251,0.042722,0.042824,0.04236,0.042359,0.041902,0.042136,0.04252,  
0.042353,0.042692,0.043245,0.042757,0.043359,0.042188,0.042556,0.04277  
9,0.043683,0.042343,0.042662,0.04288,0.042807,0.041849,0.042073,0.0428  
13,0.042822,0.041898,0.042828,0.042011,0.042127,0.042908,0.043154,0.04  
2915,0.042406,0.042228,0.043015,0.041781,0.042489,0.043029,0.042535,0.  
041862,0.043277,0.042919,0.042519,0.0421  
0.20254,0.20174,0.20283,0.2015,0.20274,0.202,0.20212,0.2031,0.20107,0.  
20166,0.20232,0.20206,0.20139,0.20225,0.20133,0.20214,0.20207,0.20188,  
0.20222,0.20243,0.28832,0.27526,0.28333,0.28176,0.20207,0.20248,0.2027  
7,0.20197,0.20218,0.20191,0.20233,0.20126,0.2014,0.20237,0.20252,0.202  
02,0.20277,0.20122,0.20271,0.36881,0.28363,0.28435,0.28316,0.28905,0.2  
5347,0.28337,0.2024,0.20197,0.20284,0.20111,0.20189,0.201,0.20309,0.20  
259,0.20116,0.20193,0.20117,0.20218,0.20151,0.20241,0.20278,0.35735,0.  
36229,0.2653,0.27635,0.28361,0.28459,0.28297,0.29738,0.29273,0.27081,0  
.2034,0.20186,0.20158,0.20271,0.20174,0.20292,0.20203,0.2021,0.20186,0  
.20206,0.20232,0.20177,0.202,0.2017,0.20183,0.36415,0.36378,0.36159,0.  
28193,0.29187,0.29775,0.27624,0.29626,0.26546,0.31233,0.28727,0.2859,0  
.20267,0.20253,0.20222,0.20294,0.20192,0.20194,0.20141,0.20263,0.20243  
,0.20135,0.20215,0.202,0.20186,0.20227,0.20177,0.20167,0.36727,0.37275  
,0.37476,0.3613,0.26986,0.2864,0.28148,0.28561,0.2812,0.28246,0.28393,  
0.2842,0.28161,0.28646,0.20227,0.20213,0.20256,0.20167,0.20108,0.20171  
,0.20212,0.20232,0.20219,0.20262,0.20136,0.20277,0.20278,0.20178,0.201  
64,0.20208,0.3553,0.37522,0.36094,0.36122,0.36456,0.35345,0.28494,0.30  
176,0.28202,0.28302,0.28412,0.29127,0.28135,0.28739,0.28617,0.28553,0.  
20216,0.20234,0.20241,0.20245,0.20145,0.20235,0.20188,0.20282,0.20238,  
0.20169,0.20275,0.20191,0.2019,0.2013,0.20183,0.20195,0.20178,0.35102,  
0.36775,0.36096,0.36817,0.3668,0.36467,0.28918,0.28182,0.29971,0.28101  
,0.29195,0.29848,0.28183,0.28367,0.28752,0.27736,0.29162,0.20151,0.202  
78,0.20192,0.20167,0.20188,0.20166,0.20171,0.20084,0.20205,0.20276,0.2  
0168,0.20144,0.20241,0.12104,0.13242,0.12564,0.20177,0.36446,0.3667,0.  
36042,0.36763,0.36479,0.36278,0.36594,0.28467,0.29692,0.27993,0.28213,  
0.28839,0.27605,0.26543,0.28591,0.2904,0.28137,0.28714,0.20277,0.20219  
,0.20235,0.20221,0.20148,0.20181,0.20227,0.20243,0.20285,0.20272,0.202  
29,0.12044,0.11023,0.11023,0.12199,0.11488,0.11098,0.20228,0.35938,0.3  
7163,0.36953,0.35517,0.36305,0.35336,0.36587,0.27108,0.28538,0.28336,0  
.28453,0.28616,0.29098,0.28215,0.2929,0.28477,0.28385,0.29859,0.2015,0  
.20215,0.20213,0.2031,0.20158,0.20212,0.20282,0.20262,0.20189,0.12739,  
0.11203,0.13048,0.12096,0.12894,0.12526,0.12246,0.10032,0.12149,0.2016  
8,0.36869,0.36766,0.35584,0.37109,0.37059,0.35605,0.36213,0.28862,0.29  
526,0.28574,0.28275,0.27702,0.28617,0.28918,0.27783,0.27874,0.30011,0.  
28457,0.28682,0.20214,0.20208,0.20282,0.20232,0.20144,0.20147,0.12255,  
0.12125,0.11961,0.12186,0.12571,0.1221,0.12343,0.13709,0.12188,0.12182  
,0.11484,0.11933,0.36412,0.36967,0.36586,0.36673,0.3623,0.36585,0.3700

1, 0.28141, 0.2822, 0.29346, 0.28348, 0.28208, 0.28598, 0.28049, 0.29621, 0.290  
27, 0.28266, 0.28423, 0.27802, 0.2015, 0.20216, 0.20276, 0.11779, 0.13452, 0.12  
158, 0.14352, 0.12185, 0.12466, 0.13895, 0.088138, 0.12189, 0.1226, 0.12984, 0.  
11761, 0.10768, 0.12898, 0.12179, 0.37161, 0.362, 0.36705, 0.36378, 0.37504, 0.  
36394, 0.36024, 0.36732, 0.3589, 0.28375, 0.27778, 0.27065, 0.28654, 0.28947, 0.  
.26026, 0.28333, 0.27968, 0.28494, 0.2844, 0.28235, 0.1216, 0.1366, 0.13529, 0.  
12272, 0.12177, 0.11834, 0.11623, 0.12225, 0.15558, 0.12166, 0.11499, 0.11859,  
0.12298, 0.12263, 0.12196, 0.12911, 0.1447, 0.12978, 0.37145, 0.37353, 0.36386  
, 0.35967, 0.36889, 0.37279, 0.36282, 0.37515, 0.36443, 0.29333, 0.2944, 0.2060  
4, 0.20529, 0.20821, 0.20387, 0.21095, 0.20403, 0.20223, 0.21153, 0.2232, 0.107  
98, 0.11916, 0.12168, 0.11951, 0.12197, 0.093952, 0.11967, 0.12633, 0.11267, 0.  
12135, 0.13328, 0.1108, 0.12441, 0.12203, 0.12315, 0.11283, 0.1158, 0.11547, 0.  
36675, 0.37788, 0.3628, 0.36112, 0.36488, 0.38139, 0.36726, 0.37716, 0.37309, 0.  
.19635, 0.20202, 0.22489, 0.20093, 0.19978, 0.20387, 0.19995, 0.17993, 0.19569  
, 0.22052, 0.20865, 0.1216, 0.096746, 0.12316, 0.12232, 0.12512, 0.12194, 0.104  
23, 0.12019, 0.12898, 0.12049, 0.10797, 0.12135, 0.13206, 0.12384, 0.12947, 0.1  
3162, 0.11852, 0.13541, 0.35675, 0.36055, 0.3744, 0.37578, 0.36614, 0.35293, 0.  
37235, 0.20407, 0.23033, 0.22416, 0.20169, 0.22082, 0.19907, 0.21543, 0.22356,  
0.1997, 0.20597, 0.21541, 0.19505, 0.21114, 0.12214, 0.14033, 0.12158, 0.1117,  
0.098256, 0.10439, 0.10822, 0.12193, 0.12235, 0.12225, 0.12309, 0.12183, 0.122  
31, 0.12272, 0.12215, 0.11756, 0.092051, 0.12896, 0.37329, 0.36241, 0.36715, 0.  
36433, 0.35721, 0.37595, 0.21768, 0.2108, 0.19688, 0.16297, 0.18721, 0.20368, 0.  
.18771, 0.21729, 0.18024, 0.19113, 0.19512, 0.21782, 0.21203, 0.22063, 0.12297  
, 0.11802, 0.12173, 0.1176, 0.10711, 0.12834, 0.11696, 0.097072, 0.12501, 0.116  
64, 0.13042, 0.10563, 0.11527, 0.12452, 0.1162, 0.12149, 0.11764, 0.10398, 0.36  
943, 0.3709, 0.37098, 0.3756, 0.37616, 0.19348, 0.20522, 0.20491, 0.19862, 0.19  
247, 0.20805, 0.18111, 0.1827, 0.2241, 0.18864, 0.20555, 0.20253, 0.20219, 0.20  
184, 0.20525, 0.12035, 0.11419, 0.1286, 0.1216, 0.1221, 0.12468, 0.13892, 0.123  
83, 0.11565, 0.12274, 0.11952, 0.11347, 0.12149, 0.11827, 0.11964, 0.12216, 0.1  
3191, 0.12818, 0.36289, 0.36686, 0.35876, 0.20065, 0.19952, 0.20063, 0.20275, 0.  
.2082, 0.19674, 0.21134, 0.1732, 0.2065, 0.19963, 0.2031, 0.17183, 0.18623, 0.2  
0882, 0.20344, 0.17641, 0.20265, 0.15676, 0.12563, 0.12188, 0.12184, 0.1222, 0.  
1216, 0.11598, 0.12198, 0.13677, 0.11885, 0.12727, 0.10995, 0.12217, 0.10916, 0.  
.090431, 0.12467, 0.12901, 0.12088, 0.36892, 0.2092, 0.21104, 0.19599, 0.2016,  
0.23183, 0.20416, 0.23155, 0.20329, 0.19407, 0.16949, 0.20244, 0.21008, 0.1994  
5, 0.18789, 0.20352, 0.20031, 0.19314, 0.19657, 0.12658, 0.12061, 0.11655, 0.11  
031, 0.12165, 0.12188, 0.11862, 0.11132, 0.12131, 0.12619, 0.12136, 0.12137, 0.  
12159, 0.1128, 0.10483, 0.12569, 0.12248, 0.041695, 0.18623, 0.20386, 0.18937,  
0.14248, 0.22035, 0.14354, 0.17695, 0.21338, 0.21742, 0.20456, 0.20049, 0.2225  
5, 0.21699, 0.17717, 0.19629, 0.23504, 0.20285, 0.20784, 0.1941, 0.12738, 0.123  
83, 0.12304, 0.12742, 0.12358, 0.13777, 0.1238, 0.10652, 0.12151, 0.10193, 0.12  
164, 0.12163, 0.12984, 0.11722, 0.12205, 0.12576, 0.12166, 0.041867, 0.21949, 0.  
.2407, 0.21059, 0.20043, 0.16342, 0.20299, 0.20534, 0.20119, 0.20734, 0.20339,  
0.23105, 0.19673, 0.20748, 0.20148, 0.20313, 0.2148, 0.2006, 0.19717, 0.12162,  
0.11388, 0.11326, 0.13785, 0.12419, 0.13715, 0.12185, 0.12989, 0.12305, 0.1212  
, 0.115, 0.12142, 0.12439, 0.10765, 0.12196, 0.12075, 0.11443, 0.1169, 0.041431  
, 0.2186, 0.21107, 0.14382, 0.18738, 0.21313, 0.19583, 0.21101, 0.20166, 0.2023  
9, 0.20228, 0.19802, 0.17665, 0.20076, 0.20158, 0.20723, 0.18918, 0.19127, 0.21  
794, 0.11378, 0.12153, 0.14902, 0.12076, 0.13199, 0.12226, 0.12328, 0.12116, 0.  
11105, 0.1315, 0.12181, 0.11304, 0.12646, 0.11926, 0.12154, 0.12273, 0.14682, 0.  
.041835, 0.041307, 0.041919, 0.27357, 0.19348, 0.20309, 0.20663, 0.24, 0.22141  
, 0.2028, 0.20246, 0.18071, 0.20409, 0.1838, 0.18958, 0.21378, 0.20589, 0.2037,

0.11328,0.1217,0.12209,0.13794,0.095753,0.1083,0.1309,0.12653,0.10446,  
0.11935,0.12365,0.12473,0.11049,0.13444,0.066714,0.109,0.13636,0.12595  
,0.041214,0.042344,0.042097,0.041493,0.19978,0.2336,0.22898,0.19129,0.  
20135,0.16996,0.18857,0.18346,0.20614,0.16731,0.20408,0.19031,0.11225,  
0.12147,0.17365,0.11664,0.11403,0.1186,0.11758,0.12159,0.14031,0.12387  
,0.12192,0.13421,0.11578,0.12224,0.16211,0.12739,0.12226,0.1271,0.1214  
2,0.12758,0.041926,0.041395,0.04173,0.042158,0.04233,0.04225,0.22957,0  
.23693,0.20371,0.20107,0.27578,0.17825,0.20979,0.20421,0.14114,0.12377  
,0.13336,0.12536,0.12411,0.12642,0.14334,0.1221,0.11944,0.12554,0.1222  
8,0.13293,0.1233,0.1177,0.10988,0.11564,0.11213,0.122,0.12176,0.11448,  
0.12179,0.12162,0.11167,0.041764,0.041793,0.041531,0.042314,0.041737,0  
.04154,0.20315,0.20122,0.22152,0.21268,0.21025,0.041385,0.041834,0.119  
06,0.12435,0.10709,0.12177,0.12185,0.12174,0.12191,0.12162,0.12207,0.1  
2745,0.12144,0.12524,0.12139,0.1549,0.14682,0.11672,0.1266,0.12137,0.1  
2637,0.12148,0.12127,0.041163,0.041766,0.041281,0.04246,0.042929,0.040  
703,0.041279,0.041889,0.042269,0.041837,0.19953,0.22167,0.041247,0.041  
553,0.040827,0.042136,0.12843,0.10354,0.12952,0.11577,0.11543,0.13583,  
0.12207,0.12159,0.1211,0.12203,0.12085,0.13066,0.1217,0.12169,0.13069,  
0.12494,0.12161,0.12562,0.11383,0.041359,0.041864,0.041616,0.041487,0.  
041262,0.041962,0.041875,0.041426,0.041998,0.042269,0.041654,0.041843,  
0.041801,0.041925,0.041743,0.040946,0.041737,0.12248,0.12136,0.12154,0  
.10952,0.12753,0.10832,0.11706,0.12207,0.12335,0.13378,0.12407,0.12189  
,0.13285,0.12995,0.12647,0.11909,0.041659,0.041887,0.041589,0.041117,0  
.041312,0.041973,0.041863,0.041499,0.042216,0.04217,0.040721,0.041938,  
0.040978,0.041381,0.041912,0.041488,0.041994,0.041442,0.041853,0.10789  
,0.12253,0.13989,0.12237,0.10974,0.122,0.12684,0.12489,0.12178,0.12296  
,0.12881,0.12157,0.14596,0.04203,0.041299,0.041853,0.041045,0.041743,0  
.041193,0.041272,0.04163,0.041545,0.04116,0.041572,0.041558,0.041693,0  
.041955,0.041812,0.041892,0.041333,0.041394,0.041792,0.04187,0.041903,  
0.1221,0.10717,0.11911,0.11946,0.1196,0.089864,0.12208,0.12209,0.1202,  
0.041708,0.04172,0.041543,0.042241,0.041201,0.041464,0.041249,0.041366  
,0.041669,0.041922,0.041687,0.04166,0.040999,0.041105,0.042215,0.04183  
,0.041777,0.041518,0.040937,0.04187,0.041981,0.041386,0.041559,0.04144  
1,0.041186,0.10587,0.12481,0.13092,0.09893,0.041586,0.041284,0.04131,0  
.041968,0.041951,0.042108,0.041561,0.041228,0.041777,0.041314,0.041005  
,0.04219,0.041623,0.04195,0.041729,0.041748,0.042103,0.041776,0.041618  
,0.041023,0.041894,0.041501,0.041148,0.041931,0.042448,0.041158,0.0412  
25,0.041797,0.041338,0.042123,0.041344,0.041386,0.041642,0.041963,0.04  
175,0.041478,0.041619,0.041831,0.041698,0.041823,0.041957,0.04136,0.04  
1872,0.041587,0.041309,0.041378,0.041184,0.041978,0.041497,0.041786,0.  
041586,0.041808,0.041121,0.041689,0.041918,0.041215,0.041347,0.041523,  
0.04092,0.041265,0.042036,0.041265,0.04213,0.041225,0.04251,0.041536,0  
.041808,0.042186,0.041398,0.041128,0.041803,0.04175,0.042142,0.041997,  
0.041285,0.041715,0.042408,0.041728,0.042019,0.04158,0.041546,0.04167,  
0.041356,0.041728,0.041553,0.042201,0.042012,0.04198,0.041812,0.042322  
,0.040892,0.041542,0.04195,0.041536,0.041687,0.04073,0.041589,0.04125,  
0.042023,0.042079,0.041623,0.041018,0.041617,0.042059,0.04188,0.042564  
,0.041385,0.041874,0.042172,0.041538,0.04145,0.042094,0.041858,0.04098  
4,0.041903,0.041296,0.041767,0.041648,0.041714,0.041807,0.041341,0.040  
877,0.042232,0.041889,0.040913,0.042311,0.041838,0.041752,0.041496,0.0  
41551,0.041666,0.042394,0.041754,0.041709,0.041884,0.040775,0.041768,0  
.041573,0.042528,0.041631,0.042133,0.041652,0.041589,0.042489,0.04186,

0.041585,0.040462,0.041729,0.041079,0.041619,0.041493,0.041504,0.04142  
,0.041799,0.041623,0.041205,0.040985,0.041212,0.041553,0.041195,0.0419  
18,0.042008,0.04196,0.042256,0.041424,0.041726,0.04197,0.042854,0.0415  
65,0.041744,0.041602,0.041759,0.041201,0.041428,0.04218,0.042111,0.041  
299,0.041842,0.040837,0.041081,0.04185,0.042055,0.042173,0.041195,0.04  
1235,0.042043,0.040717,0.041837,0.042176,0.041495,0.041107,0.042425,0.  
042064,0.041658,0.041076  
0.2035,0.20285,0.20404,0.20214,0.20364,0.20302,0.20311,0.20406,0.20215  
,0.20277,0.20339,0.20313,0.20265,0.20295,0.20251,0.20318,0.20301,0.203  
08,0.20349,0.20311,0.28905,0.27619,0.28213,0.27903,0.20286,0.20316,0.2  
0398,0.20265,0.20323,0.20263,0.2031,0.20266,0.20282,0.20343,0.20343,0.  
20285,0.20322,0.20196,0.20351,0.36675,0.2815,0.28436,0.2823,0.28723,0.  
25438,0.28031,0.20369,0.20307,0.20405,0.20238,0.20284,0.20205,0.20385,  
0.2036,0.20182,0.20261,0.20267,0.20271,0.20292,0.20341,0.20399,0.35086  
,0.35878,0.26485,0.27303,0.28129,0.28221,0.28091,0.2961,0.29376,0.2705  
6,0.20437,0.20274,0.20247,0.20325,0.20281,0.20414,0.20289,0.20343,0.20  
282,0.20366,0.20321,0.20276,0.20308,0.20276,0.20269,0.35968,0.36019,0.  
36269,0.28183,0.28955,0.29692,0.27502,0.29598,0.26532,0.30911,0.28858,  
0.28369,0.20362,0.20375,0.20366,0.20366,0.20317,0.2029,0.20203,0.20343  
,0.20323,0.20248,0.20328,0.20332,0.20306,0.20289,0.2025,0.20265,0.3625  
8,0.36702,0.37631,0.35834,0.26789,0.28955,0.28005,0.28432,0.28096,0.27  
939,0.28381,0.28298,0.28168,0.28506,0.20368,0.20303,0.20324,0.20286,0.  
20218,0.2028,0.20344,0.20334,0.20337,0.20348,0.20207,0.20374,0.20342,0.  
.20265,0.20283,0.20277,0.35341,0.36992,0.36227,0.35547,0.36121,0.3508,  
0.28268,0.29991,0.28085,0.28298,0.28068,0.28828,0.28317,0.28779,0.2847  
8,0.28268,0.20341,0.20359,0.20358,0.20371,0.20277,0.20346,0.20295,0.20  
407,0.2028,0.2026,0.20381,0.20307,0.20283,0.20215,0.20287,0.20291,0.20  
261,0.35156,0.36453,0.36011,0.36308,0.3649,0.35936,0.28938,0.28003,0.2  
99,0.27793,0.28884,0.29615,0.2831,0.28252,0.28471,0.27588,0.29214,0.20  
251,0.20341,0.20272,0.20271,0.2025,0.20278,0.20267,0.20208,0.20331,0.2  
0342,0.20275,0.20236,0.20365,0.12113,0.13292,0.1258,0.20302,0.35929,0.  
36267,0.35628,0.36711,0.3665,0.35776,0.36303,0.28392,0.29557,0.27805,0.  
.28029,0.28775,0.27598,0.26519,0.28349,0.28903,0.28037,0.28628,0.20393  
,0.20316,0.20323,0.20348,0.20287,0.20314,0.20339,0.20371,0.2038,0.2033  
1,0.20287,0.12053,0.11041,0.11015,0.12218,0.11512,0.11116,0.20345,0.36  
101,0.36687,0.36598,0.3511,0.35841,0.3509,0.36279,0.27363,0.2853,0.281  
22,0.28533,0.28373,0.28836,0.28082,0.29224,0.28441,0.2824,0.29832,0.20  
252,0.2031,0.20341,0.20463,0.20244,0.20312,0.20354,0.20384,0.20292,0.1  
2763,0.11218,0.13057,0.12123,0.12912,0.12545,0.12279,0.10015,0.12147,0.  
.2025,0.36515,0.3641,0.35377,0.36172,0.36929,0.35374,0.35576,0.28868,0.  
.29283,0.28432,0.28176,0.27564,0.28609,0.28841,0.2749,0.27642,0.29683,  
0.28321,0.28602,0.20291,0.20281,0.2036,0.20298,0.20252,0.20241,0.12266  
,0.12106,0.11976,0.12206,0.126,0.12226,0.12383,0.13732,0.12217,0.12207  
,0.11492,0.11963,0.35948,0.37138,0.36367,0.36128,0.36405,0.36816,0.367  
08,0.2816,0.28133,0.29142,0.28153,0.28252,0.28635,0.27906,0.29534,0.29  
167,0.28205,0.28299,0.27767,0.20242,0.20328,0.20335,0.11788,0.1345,0.1  
2166,0.14393,0.12217,0.12465,0.13945,0.088135,0.12207,0.12258,0.13021,  
0.11771,0.10781,0.12927,0.12181,0.3684,0.35503,0.36364,0.36538,0.37211  
,0.35839,0.35577,0.36819,0.35502,0.28333,0.2774,0.27072,0.2862,0.28926  
,0.26002,0.28093,0.2803,0.28416,0.28161,0.28288,0.12176,0.13685,0.1354  
9,0.12279,0.12177,0.11846,0.11643,0.12224,0.15645,0.12199,0.1151,0.118  
75,0.1233,0.12261,0.12225,0.12939,0.14509,0.12984,0.37127,0.37172,0.35

987,0.36066,0.3663,0.36665,0.3603,0.3711,0.36177,0.29111,0.29141,0.204  
66,0.20524,0.20592,0.20358,0.20884,0.20224,0.20183,0.21062,0.22335,0.1  
08,0.11918,0.12185,0.11956,0.12221,0.093878,0.1198,0.12661,0.11268,0.1  
2164,0.1337,0.11108,0.12471,0.12196,0.12349,0.11294,0.11582,0.11557,0.  
36124,0.37354,0.3594,0.35974,0.36248,0.38006,0.35942,0.3739,0.37005,0.  
19493,0.2023,0.22403,0.19973,0.19797,0.20297,0.19913,0.17875,0.19635,0  
.21924,0.20792,0.12206,0.096652,0.12335,0.12225,0.12536,0.1219,0.10427  
,0.12044,0.12927,0.12069,0.108,0.1217,0.13217,0.12418,0.12953,0.13176,  
0.11851,0.13599,0.34848,0.3597,0.36792,0.37383,0.36132,0.34856,0.36734  
,0.20028,0.22748,0.22227,0.20064,0.22007,0.19867,0.21675,0.22205,0.198  
89,0.20419,0.21458,0.19414,0.20955,0.12224,0.14059,0.1217,0.11174,0.09  
7972,0.10432,0.10826,0.12202,0.12248,0.12222,0.12331,0.12177,0.1224,0.  
12291,0.1221,0.11781,0.092061,0.12913,0.36822,0.36143,0.3616,0.36162,0  
.35106,0.36991,0.21368,0.20917,0.19479,0.16062,0.18477,0.20351,0.18741  
,0.21351,0.17906,0.18865,0.19569,0.21383,0.2104,0.22001,0.12338,0.1178  
9,0.12185,0.1178,0.10731,0.12845,0.11709,0.096648,0.12517,0.11688,0.13  
083,0.10567,0.11537,0.1245,0.11622,0.12159,0.11764,0.10397,0.36331,0.3  
6646,0.36723,0.3707,0.37335,0.19279,0.20342,0.20321,0.19551,0.19013,0.  
20675,0.18162,0.18219,0.22241,0.18703,0.2042,0.20116,0.20215,0.20149,0  
.20447,0.12023,0.11425,0.12892,0.12173,0.12226,0.12489,0.13926,0.12398  
,0.11584,0.12285,0.11991,0.11341,0.12152,0.11846,0.11988,0.12246,0.132  
23,0.12848,0.35905,0.36346,0.35077,0.19848,0.19662,0.19836,0.20292,0.2  
0863,0.19406,0.20777,0.17183,0.20563,0.19713,0.20282,0.16983,0.18538,0  
.20798,0.20178,0.17595,0.20225,0.15738,0.12579,0.122,0.12221,0.12243,0  
.12185,0.11587,0.1224,0.13739,0.11922,0.12729,0.11008,0.12245,0.10926,  
0.090445,0.12512,0.12929,0.12104,0.36425,0.21126,0.21123,0.19284,0.199  
16,0.23128,0.20113,0.22735,0.19957,0.19225,0.1687,0.20166,0.20806,0.19  
79,0.18581,0.20154,0.19873,0.19298,0.196,0.12658,0.12044,0.11651,0.110  
29,0.12168,0.12225,0.11866,0.11136,0.1214,0.12648,0.12172,0.12176,0.12  
182,0.11291,0.10486,0.12584,0.12279,0.041163,0.18506,0.20116,0.18733,0  
.14207,0.21943,0.14067,0.17554,0.21003,0.2122,0.20066,0.19988,0.2215,0  
.21332,0.17708,0.19449,0.23588,0.20362,0.20681,0.19438,0.12755,0.12415  
,0.12336,0.12735,0.12388,0.13807,0.1243,0.10667,0.12181,0.10194,0.1220  
6,0.12201,0.12999,0.11707,0.12215,0.12621,0.12191,0.04104,0.21784,0.24  
074,0.20948,0.2006,0.1612,0.20226,0.20367,0.20064,0.20557,0.20368,0.23  
146,0.19543,0.20601,0.20223,0.20137,0.21456,0.19919,0.19594,0.12187,0.  
11409,0.11343,0.13822,0.12461,0.13747,0.12196,0.13004,0.12334,0.12138,  
0.11515,0.12159,0.12489,0.10773,0.12218,0.12092,0.11446,0.1171,0.04065  
9,0.21484,0.20782,0.14289,0.18502,0.21171,0.19482,0.20872,0.19897,0.20  
027,0.20127,0.19851,0.17535,0.20097,0.20227,0.20665,0.18881,0.18978,0.  
21753,0.1138,0.12179,0.1496,0.12132,0.13204,0.12216,0.12357,0.12112,0.  
11123,0.13197,0.1219,0.11294,0.12664,0.11981,0.12192,0.12309,0.14741,0  
.041052,0.040648,0.041261,0.26917,0.19109,0.20068,0.20343,0.23531,0.22  
06,0.20317,0.20115,0.18109,0.20311,0.18299,0.18838,0.21249,0.2062,0.20  
308,0.11359,0.12184,0.12217,0.13838,0.09561,0.10837,0.13116,0.127,0.10  
449,0.11947,0.12362,0.12476,0.11064,0.13474,0.066083,0.10902,0.13681,0  
.12621,0.040816,0.041429,0.041284,0.040719,0.19876,0.23282,0.22598,0.1  
8943,0.20101,0.16774,0.18723,0.18215,0.2051,0.16709,0.20264,0.1895,0.1  
1225,0.12161,0.17429,0.1166,0.11374,0.11893,0.11782,0.12186,0.14056,0.  
12409,0.12206,0.13461,0.11586,0.12238,0.16253,0.1276,0.12241,0.12747,0  
.12162,0.12765,0.041234,0.040756,0.041229,0.041241,0.041512,0.04152,0.  
22412,0.23524,0.20256,0.199,0.27244,0.17612,0.2077,0.20404,0.14138,0.1

2399,0.13356,0.12573,0.12438,0.12665,0.14364,0.12231,0.11966,0.12558,0.12235,0.1333,0.12378,0.11794,0.10993,0.11585,0.11231,0.12207,0.1219,0.11469,0.12209,0.12204,0.11191,0.041121,0.041298,0.040786,0.041421,0.04114,0.040728,0.1998,0.19821,0.21907,0.21329,0.20978,0.041101,0.041283,0.11914,0.12465,0.1072,0.12203,0.12196,0.12232,0.12223,0.1217,0.12213,0.12752,0.12138,0.12565,0.1217,0.15554,0.14723,0.11686,0.12674,0.12154,0.12674,0.12194,0.12148,0.04056,0.041169,0.040719,0.041816,0.042061,0.040496,0.040437,0.040814,0.041538,0.041184,0.19912,0.21793,0.04105,0.040728,0.040167,0.041436,0.12854,0.10346,0.12963,0.1159,0.11566,0.13627,0.12221,0.12158,0.12156,0.12208,0.12106,0.13105,0.12194,0.12205,0.13077,0.12515,0.1218,0.12592,0.1139,0.040652,0.040943,0.041024,0.04055,0.040568,0.040969,0.04133,0.040843,0.041422,0.041795,0.040954,0.040988,0.04083,0.041509,0.040982,0.040078,0.040998,0.12271,0.12165,0.12166,0.10939,0.12762,0.10834,0.11732,0.12204,0.12357,0.13412,0.12453,0.12206,0.13316,0.13039,0.12673,0.1193,0.040989,0.041367,0.041071,0.040886,0.040778,0.041178,0.041024,0.040735,0.04118,0.041473,0.040039,0.041307,0.040354,0.040577,0.041103,0.040918,0.041326,0.040847,0.04116,0.1078,0.12271,0.14031,0.12257,0.10995,0.12224,0.127,0.12503,0.12219,0.12311,0.12913,0.12187,0.14656,0.041393,0.040202,0.041404,0.040239,0.041182,0.040466,0.04071,0.041278,0.041043,0.040452,0.041144,0.041062,0.040787,0.041145,0.040873,0.041062,0.040835,0.040566,0.040936,0.041258,0.041129,0.12219,0.1073,0.11928,0.11945,0.11975,0.089799,0.12233,0.12215,0.12001,0.041062,0.041169,0.040809,0.041489,0.040484,0.040934,0.040784,0.040846,0.04068,0.041115,0.040827,0.041271,0.040618,0.040568,0.04156,0.041187,0.041131,0.041053,0.040196,0.04135,0.041201,0.040567,0.040882,0.040853,0.040735,0.10601,0.12497,0.13097,0.098953,0.041127,0.04065,0.040726,0.041423,0.041409,0.041619,0.04114,0.040394,0.041071,0.040146,0.040525,0.041471,0.040925,0.041177,0.041219,0.041185,0.041553,0.041058,0.040727,0.040523,0.041157,0.041303,0.040643,0.041354,0.041354,0.040611,0.040542,0.041141,0.040828,0.041827,0.040825,0.040724,0.041049,0.041326,0.041079,0.040823,0.041295,0.040939,0.040895,0.041268,0.041532,0.040701,0.041102,0.040716,0.040737,0.041193,0.040684,0.041395,0.040779,0.04093,0.040789,0.04124,0.040616,0.041159,0.041072,0.040569,0.040568,0.040879,0.040235,0.04063,0.04161,0.040583,0.041168,0.040542,0.041755,0.040723,0.041321,0.041377,0.040653,0.04058,0.040869,0.041157,0.040948,0.041213,0.040859,0.040971,0.041516,0.041058,0.041359,0.040906,0.040871,0.040782,0.040521,0.041173,0.0407,0.041771,0.041223,0.041487,0.04123,0.041519,0.040325,0.041021,0.040885,0.040976,0.040989,0.040434,0.040973,0.040571,0.041266,0.04152,0.040754,0.040585,0.040998,0.041548,0.041285,0.041547,0.040863,0.041275,0.041421,0.040712,0.04071,0.041356,0.041235,0.040364,0.041278,0.040613,0.041039,0.041236,0.041193,0.041049,0.04069,0.040164,0.041214,0.041403,0.04048,0.041645,0.041081,0.041031,0.040916,0.040945,0.040987,0.041786,0.041054,0.041088,0.041024,0.04,0.041017,0.040986,0.041458,0.040967,0.041055,0.040691,0.04089,0.041936,0.041028,0.041069,0.039728,0.041127,0.040533,0.04083,0.040719,0.04087,0.040812,0.041117,0.040909,0.040432,0.040238,0.040634,0.040674,0.040348,0.041188,0.041367,0.041071,0.041517,0.040622,0.040963,0.041414,0.042155,0.040631,0.040894,0.040995,0.040879,0.040419,0.040779,0.04142,0.041241,0.040651,0.041253,0.040196,0.040054,0.041026,0.041496,0.041354,0.040306,0.040932,0.04133,0.039971,0.041265,0.04158,0.041076,0.040515,0.041707,0.041299,0.041217,0.040493



0.20429,0.20314,0.20427,0.20339,0.20469,0.20368,0.20418,0.20521,0.20313,0.20386,0.20421,0.20404,0.20306,0.20377,0.20348,0.20397,0.20378,0.20398,0.20431,0.20393,0.28721,0.27272,0.28316,0.27824,0.20422,0.20423,0.20492,0.20348,0.20402,0.20332,0.20387,0.20389,0.20381,0.2042,0.20469,0.20394,0.20424,0.20342,0.20434,0.36646,0.28129,0.283,0.28085,0.2865,0.25399,0.27981,0.20433,0.20384,0.2048,0.20299,0.20384,0.20305,0.20463,0.20453,0.20292,0.2034,0.20364,0.20348,0.20406,0.20441,0.20481,0.3503,0.35034,0.26399,0.2726,0.28152,0.28101,0.2804,0.29423,0.2946,0.26999,0.20511,0.20365,0.20349,0.20388,0.20359,0.20519,0.20403,0.20463,0.20395,0.20481,0.20381,0.20374,0.20391,0.20325,0.20385,0.35721,0.35815,0.3568,0.28009,0.29046,0.29468,0.27497,0.29397,0.26347,0.3068,0.2868,0.28321,0.20405,0.20459,0.2045,0.20413,0.20416,0.20422,0.20264,0.20406,0.20374,0.20316,0.20412,0.20399,0.20431,0.20346,0.20337,0.20366,0.36,0.36765,0.37155,0.35725,0.26893,0.28924,0.27917,0.28382,0.28075,0.27739,0.28467,0.28408,0.28146,0.28471,0.20456,0.20388,0.20415,0.20393,0.20279,0.20412,0.20451,0.20405,0.20394,0.20457,0.20299,0.20492,0.20473,0.20322,0.20359,0.20317,0.34786,0.36975,0.35568,0.35562,0.36508,0.34741,0.28224,0.2956,0.28008,0.28048,0.27986,0.28746,0.28304,0.28736,0.28383,0.28236,0.20408,0.20443,0.20443,0.20445,0.20364,0.20462,0.20405,0.20501,0.20416,0.20275,0.20455,0.20386,0.20351,0.20325,0.20367,0.20386,0.20384,0.34786,0.36127,0.35598,0.3588,0.36324,0.3548,0.28577,0.28031,0.29626,0.2766,0.28568,0.29469,0.2838,0.28132,0.28187,0.27321,0.29191,0.20341,0.2043,0.20354,0.20343,0.20346,0.20411,0.20341,0.20229,0.20441,0.2048,0.20329,0.20305,0.20464,0.12149,0.13332,0.1261,0.20428,0.35563,0.3583,0.35799,0.3599,0.35873,0.3571,0.36435,0.28223,0.29261,0.27865,0.27732,0.28945,0.2775,0.26573,0.2811,0.28767,0.27983,0.28405,0.20467,0.20421,0.20453,0.20399,0.20397,0.20445,0.20429,0.20457,0.20465,0.20454,0.20412,0.12108,0.11017,0.11031,0.12236,0.11501,0.11123,0.20452,0.35713,0.36692,0.36594,0.3523,0.3592,0.34597,0.36037,0.27254,0.28721,0.27977,0.28393,0.28255,0.28828,0.2796,0.29135,0.2837,0.28242,0.29861,0.20352,0.2043,0.20395,0.20517,0.2032,0.20401,0.20453,0.2049,0.20402,0.12759,0.11213,0.13083,0.12117,0.12943,0.12564,0.12302,0.10011,0.12171,0.20349,0.36351,0.3599,0.35371,0.35919,0.36698,0.3491,0.35061,0.28813,0.29093,0.28342,0.28067,0.27366,0.28591,0.28886,0.27476,0.27525,0.29645,0.28198,0.28442,0.20371,0.20322,0.20423,0.20402,0.20337,0.20326,0.12281,0.12133,0.12006,0.12227,0.12599,0.12241,0.12391,0.13762,0.12225,0.12224,0.115,0.11974,0.35866,0.36998,0.3607,0.361,0.36589,0.36482,0.36359,0.28046,0.27983,0.29125,0.2812,0.28313,0.28514,0.27847,0.2933,0.28815,0.28311,0.28249,0.27583,0.20338,0.20433,0.2041,0.11795,0.1348,0.12188,0.14428,0.12243,0.12505,0.14004,0.087861,0.12259,0.12284,0.13062,0.11781,0.10792,0.12953,0.12208,0.36492,0.35226,0.3618,0.36048,0.37201,0.35559,0.35406,0.36399,0.35338,0.28053,0.277,0.26969,0.28422,0.28638,0.25819,0.28148,0.27717,0.28411,0.27889,0.27933,0.12207,0.13704,0.1359,0.12321,0.12192,0.11869,0.11654,0.12234,0.15699,0.12216,0.11522,0.11902,0.12324,0.12272,0.12242,0.12962,0.14538,0.13001,0.36845,0.36737,0.35544,0.35735,0.36506,0.36528,0.35525,0.37538,0.359,0.28792,0.28952,0.20452,0.2043,0.20407,0.20305,0.20697,0.20081,0.20079,0.21015,0.22285,0.10822,0.11945,0.12198,0.11963,0.12225,0.093709,0.11987,0.1266,0.1128,0.1217,0.13395,0.11141,0.12502,0.12205,0.12358,0.11314,0.11592,0.11593,0.35755,0.37353,0.35666,0.3588,0.36229,0.37461,0.35928,0.36802,0.36673,0.19306,0.20194,0.22281,0.20006,0.19691,0.2019,0.19789,0.17778,0.19504,0.21911,0.20734,0.12215,0.096557,0.12324,0.12242,0.12562,0.12211,0.10423,0.12073,0

.12941,0.12082,0.1082,0.12184,0.1326,0.12423,0.12978,0.13208,0.11862,0.13639,0.34515,0.35628,0.36208,0.36674,0.35831,0.35041,0.36662,0.19867,0.22605,0.22241,0.19862,0.21979,0.19916,0.21536,0.22108,0.19776,0.20412,0.21366,0.19554,0.20962,0.12261,0.14076,0.122,0.11169,0.097825,0.1044,0.10826,0.12198,0.12266,0.12222,0.12365,0.12171,0.12273,0.12272,0.12223,0.11785,0.091769,0.12932,0.36217,0.35808,0.35742,0.36021,0.34881,0.36487,0.2125,0.20729,0.19412,0.15832,0.18311,0.20247,0.187,0.212,0.1781,0.18849,0.19508,0.21027,0.20967,0.21775,0.12369,0.11829,0.12214,0.11773,0.10747,0.1286,0.11733,0.09654,0.12526,0.11697,0.13105,0.10588,0.11565,0.12491,0.11641,0.12167,0.11776,0.10387,0.35976,0.36385,0.36143,0.36632,0.36835,0.19021,0.20218,0.19961,0.19445,0.18935,0.20541,0.1814,0.18086,0.222,0.18662,0.20373,0.20022,0.20076,0.20126,0.20464,0.12046,0.11424,0.12914,0.1221,0.12252,0.1252,0.13944,0.12412,0.11586,0.12304,0.12025,0.11354,0.12182,0.11893,0.12026,0.12267,0.13256,0.12852,0.35788,0.36021,0.34645,0.19382,0.19574,0.19545,0.20126,0.20774,0.19264,0.20829,0.17145,0.20408,0.19592,0.20079,0.16931,0.18355,0.20702,0.20231,0.17523,0.20091,0.15777,0.12597,0.12246,0.12243,0.12262,0.12215,0.1161,0.12254,0.138,0.11931,0.12744,0.11018,0.12263,0.10941,0.090388,0.12546,0.12951,0.12109,0.3641,0.21114,0.20813,0.19064,0.19747,0.22842,0.19856,0.22354,0.19928,0.19238,0.16836,0.20012,0.20656,0.19567,0.18624,0.20151,0.19817,0.19232,0.19473,0.12693,0.12083,0.11664,0.1104,0.12181,0.12244,0.11876,0.11152,0.12187,0.12693,0.12188,0.12212,0.12216,0.11281,0.10488,0.12599,0.12288,0.040635,0.18228,0.19931,0.18711,0.14062,0.21802,0.14023,0.17574,0.21016,0.20895,0.1982,0.19848,0.22123,0.21042,0.1766,0.19458,0.23583,0.20242,0.20536,0.19308,0.12768,0.1242,0.12367,0.12734,0.12405,0.13828,0.12468,0.10695,0.12201,0.10189,0.12207,0.12206,0.13016,0.11713,0.12217,0.12647,0.12215,0.040578,0.21675,0.24022,0.2079,0.19863,0.15978,0.1996,0.20001,0.1983,0.20316,0.20186,0.23088,0.19525,0.20443,0.20221,0.20169,0.21237,0.19771,0.19444,0.1219,0.1142,0.11383,0.13856,0.12464,0.13769,0.12206,0.13019,0.1234,0.1218,0.11532,0.12196,0.1252,0.10797,0.12234,0.12106,0.11449,0.11733,0.040378,0.21308,0.20512,0.14158,0.18245,0.2102,0.1942,0.20673,0.19664,0.19853,0.19951,0.19755,0.17581,0.19992,0.2012,0.20518,0.18884,0.18918,0.21703,0.11382,0.12186,0.15,0.1217,0.13244,0.12249,0.12376,0.1212,0.11117,0.13227,0.12219,0.11299,0.12694,0.1202,0.12212,0.12317,0.1478,0.040813,0.040234,0.040612,0.26135,0.18868,0.19839,0.20259,0.23288,0.21736,0.19985,0.20093,0.18015,0.20405,0.18266,0.1885,0.21179,0.20515,0.2026,0.11378,0.1221,0.12252,0.13876,0.09575,0.1084,0.13145,0.12742,0.10488,0.11987,0.12373,0.12514,0.11064,0.13492,0.065654,0.10917,0.13724,0.12618,0.040255,0.04089,0.040713,0.040281,0.19658,0.23019,0.2229,0.18991,0.20083,0.16666,0.18534,0.18045,0.20412,0.16632,0.20166,0.18919,0.11242,0.12195,0.17522,0.1165,0.11391,0.11924,0.11784,0.12207,0.14101,0.12449,0.12219,0.13478,0.11623,0.12276,0.16323,0.12801,0.12255,0.1278,0.12197,0.12806,0.04085,0.040116,0.04049,0.040668,0.041125,0.041156,0.22257,0.23456,0.20036,0.19761,0.27047,0.17474,0.20619,0.20287,0.14175,0.12439,0.13405,0.12627,0.12436,0.1268,0.14372,0.12238,0.12015,0.12578,0.12256,0.13358,0.12423,0.11797,0.10972,0.11615,0.11241,0.12237,0.12191,0.11453,0.12236,0.1229,0.11214,0.04058,0.04078,0.040666,0.040731,0.040611,0.04006,0.20018,0.19741,0.21706,0.20893,0.20791,0.040597,0.040662,0.11929,0.12501,0.10743,0.12209,0.12233,0.12249,0.12233,0.12175,0.122,0.12785,0.12147,0.12575,0.12192,0.15624,0.14747,0.11702,0.12682,0.12165,0.12682,0.12219,0.12203,0.040209,0.040482,0.040289,0.041135,0.041741,0.03996,0.039764,0.

040393,0.041104,0.040401,0.19825,0.21666,0.040424,0.040008,0.039697,0.040706,0.12882,0.10341,0.12999,0.11597,0.11585,0.13672,0.12243,0.12172,0.1218,0.12205,0.12101,0.13132,0.12214,0.12245,0.13087,0.12545,0.1221,0.12612,0.11396,0.040149,0.040175,0.040656,0.040061,0.040167,0.040364,0.041018,0.040031,0.040976,0.041515,0.040362,0.040123,0.040426,0.041043,0.040531,0.039636,0.040254,0.12299,0.12194,0.12196,0.10979,0.12777,0.10841,0.11733,0.12226,0.12354,0.1341,0.12477,0.12234,0.13341,0.13069,0.12717,0.11929,0.040508,0.040893,0.040424,0.040154,0.040197,0.040616,0.040476,0.040451,0.040491,0.040824,0.039745,0.040773,0.040044,0.040242,0.040449,0.040524,0.040841,0.040138,0.040543,0.1079,0.12289,0.14067,0.12273,0.10999,0.12254,0.12722,0.1253,0.12226,0.1233,0.12937,0.12194,0.14674,0.040878,0.039627,0.040957,0.039908,0.040574,0.040085,0.040269,0.040334,0.040492,0.04025,0.040651,0.040519,0.040406,0.040408,0.040345,0.040314,0.040115,0.04021,0.040429,0.040762,0.040573,0.12252,0.10747,0.11943,0.11955,0.11973,0.089618,0.12253,0.12241,0.12003,0.040541,0.040755,0.04057,0.040808,0.040122,0.040419,0.040308,0.040207,0.04032,0.04057,0.040206,0.040728,0.040065,0.040186,0.041366,0.040912,0.040619,0.040476,0.040014,0.040711,0.040846,0.040015,0.040487,0.040506,0.040223,0.10605,0.12511,0.13113,0.099032,0.040009,0.040088,0.040294,0.040727,0.040498,0.041432,0.040619,0.039986,0.040686,0.039589,0.040149,0.041101,0.040802,0.040626,0.040685,0.040496,0.040979,0.040822,0.040433,0.040114,0.040453,0.040959,0.040264,0.040812,0.040869,0.040088,0.040218,0.040315,0.040318,0.041185,0.040549,0.040239,0.040416,0.04098,0.040629,0.040268,0.040544,0.040427,0.040646,0.04106,0.040913,0.040277,0.040651,0.040182,0.040734,0.040607,0.040135,0.040953,0.040724,0.040641,0.040397,0.040694,0.040223,0.040733,0.04074,0.040151,0.040173,0.040562,0.03991,0.040055,0.041279,0.040134,0.040665,0.040109,0.041378,0.040415,0.0411,0.040659,0.040137,0.040407,0.040287,0.040618,0.040508,0.040619,0.040478,0.040475,0.040963,0.040814,0.040703,0.040211,0.040313,0.040209,0.04024,0.03991,0.040262,0.041138,0.040479,0.040946,0.040588,0.040943,0.039991,0.040831,0.040779,0.040427,0.040372,0.039655,0.040508,0.039798,0.041175,0.040995,0.040263,0.040316,0.040601,0.040996,0.040424,0.041419,0.040786,0.040712,0.040889,0.040416,0.040295,0.040835,0.040698,0.039966,0.040732,0.040108,0.040615,0.040711,0.040723,0.040543,0.040148,0.039841,0.041119,0.041102,0.04046,0.041194,0.040444,0.040377,0.04056,0.040182,0.040481,0.041266,0.040343,0.040569,0.040506,0.039468,0.040798,0.040245,0.041045,0.040347,0.040767,0.040275,0.0404,0.04119,0.040245,0.040644,0.039545,0.04066,0.039885,0.040317,0.040415,0.040437,0.040179,0.04076,0.040389,0.039749,0.039733,0.039954,0.040263,0.039776,0.040691,0.040904,0.040609,0.041505,0.039853,0.040296,0.040893,0.041845,0.040031,0.040604,0.040577,0.040296,0.040065,0.040005,0.040736,0.041005,0.040047,0.040704,0.039785,0.03949,0.04049,0.040775,0.040835,0.040009,0.040361,0.040785,0.039877,0.040672,0.040719,0.040799,0.039976,0.041073,0.040853,0.040848,0.039902

0.20486,0.20362,0.20492,0.20443,0.20527,0.20437,0.20473,0.2057,0.20389,0.20483,0.20492,0.20517,0.20449,0.20424,0.20444,0.20492,0.20463,0.20472,0.20485,0.20476,0.28536,0.27195,0.28465,0.27409,0.20551,0.20497,0.2056,0.20456,0.2046,0.20447,0.2046,0.20462,0.20497,0.20515,0.20498,0.20434,0.20505,0.20461,0.20535,0.36364,0.28016,0.27948,0.28131,0.28567,0.25424,0.2786,0.20525,0.20467,0.20584,0.20375,0.20482,0.20355,0.20582,0.20511,0.20363,0.20409,0.20513,0.20395,0.20487,0.20463,0.20559,0.35018,0.34805,0.26243,0.2714,0.28104,0.2809,0.2769,0.29379,0.29274,0.26961,

0.20579,0.20462,0.20465,0.20481,0.20429,0.20605,0.20496,0.20525,0.2049  
9,0.2058,0.20439,0.2045,0.20502,0.20402,0.2045,0.35222,0.35682,0.35011  
,0.27875,0.28797,0.2928,0.27233,0.29188,0.26442,0.30604,0.28583,0.2821  
7,0.20496,0.20541,0.2051,0.20522,0.20459,0.20491,0.20387,0.20455,0.204  
93,0.20365,0.20484,0.2053,0.20496,0.20426,0.20361,0.20434,0.35882,0.36  
504,0.36873,0.35386,0.26906,0.28698,0.27876,0.28537,0.28078,0.27697,0.  
28296,0.28299,0.28031,0.28438,0.20518,0.20505,0.20499,0.2048,0.20397,0.  
.20475,0.20586,0.20461,0.20442,0.20562,0.20386,0.20514,0.20589,0.20438  
,0.2044,0.20426,0.34787,0.36461,0.35112,0.35073,0.36609,0.34211,0.2807  
1,0.29489,0.278,0.27973,0.28064,0.2858,0.27971,0.28645,0.28214,0.2815,  
0.20506,0.20498,0.205,0.20542,0.20442,0.20474,0.20486,0.20567,0.20477,  
0.20376,0.20519,0.20483,0.20386,0.20402,0.20476,0.20493,0.20447,0.3471  
1,0.35675,0.35293,0.35627,0.36216,0.35338,0.28651,0.28028,0.29533,0.27  
596,0.28551,0.29344,0.28306,0.28167,0.28331,0.27224,0.29095,0.20436,0.  
20526,0.20413,0.20446,0.20497,0.20497,0.20448,0.20381,0.20574,0.20525,  
0.20447,0.20408,0.20523,0.12173,0.13358,0.12634,0.20475,0.35663,0.3541  
8,0.35619,0.35843,0.35581,0.35138,0.36491,0.28238,0.29132,0.27922,0.27  
713,0.2856,0.27745,0.26398,0.27999,0.28498,0.27944,0.28256,0.20549,0.2  
0485,0.20509,0.20479,0.20501,0.20466,0.20524,0.20506,0.20572,0.20502,0.  
.2047,0.12122,0.11039,0.11041,0.12242,0.11521,0.11125,0.2056,0.35613,0.  
.36147,0.36327,0.35109,0.3574,0.34712,0.35996,0.27219,0.28432,0.27888,  
0.28277,0.28116,0.28851,0.27716,0.29334,0.28512,0.2813,0.29656,0.20386  
,0.20525,0.20483,0.20601,0.20364,0.2045,0.20555,0.20546,0.2047,0.1277,  
0.11229,0.1311,0.12128,0.12959,0.12554,0.12326,0.10005,0.12194,0.2039,  
0.36224,0.35597,0.35357,0.35669,0.36135,0.35152,0.35272,0.28675,0.2905  
,0.28305,0.27875,0.27163,0.28471,0.28591,0.27669,0.27553,0.29428,0.281  
33,0.28471,0.20443,0.20383,0.20482,0.20486,0.20429,0.20412,0.12324,0.1  
2165,0.12033,0.12241,0.12642,0.12263,0.12411,0.13798,0.1223,0.12248,0.  
1152,0.11997,0.35408,0.36672,0.36168,0.35716,0.36342,0.3591,0.3581,0.2  
8231,0.27838,0.28886,0.28082,0.2813,0.28187,0.27705,0.29455,0.28978,0.  
2823,0.28244,0.2745,0.2045,0.20521,0.20515,0.11805,0.13543,0.12202,0.1  
4475,0.12271,0.12515,0.14009,0.087833,0.12285,0.12275,0.1311,0.11815,0.  
.10795,0.12968,0.12208,0.3627,0.35495,0.36086,0.35882,0.3635,0.35255,0.  
.35214,0.36521,0.35353,0.28042,0.2768,0.26961,0.28387,0.28346,0.25707,  
0.27929,0.27709,0.28441,0.27824,0.28093,0.122,0.13727,0.13606,0.12335,  
0.12225,0.1188,0.11669,0.12241,0.15715,0.12248,0.11528,0.1191,0.12356,  
0.12302,0.12232,0.12972,0.14576,0.13027,0.36954,0.36608,0.3538,0.35633  
,0.36482,0.36486,0.35978,0.36846,0.35517,0.28699,0.28888,0.20291,0.203  
46,0.20212,0.2026,0.20687,0.20119,0.1993,0.20998,0.2228,0.10806,0.1197  
8,0.12202,0.11994,0.1228,0.093769,0.12008,0.12688,0.11293,0.12195,0.13  
44,0.11164,0.12507,0.12228,0.12374,0.11308,0.11603,0.11623,0.35811,0.3  
6797,0.35669,0.36008,0.35918,0.36732,0.36197,0.36507,0.36204,0.19184,0.  
.20167,0.22205,0.20028,0.19758,0.20111,0.19696,0.17784,0.195,0.21843,0.  
.20498,0.12213,0.096411,0.12317,0.12286,0.12592,0.12225,0.10419,0.1210  
9,0.12978,0.1209,0.10813,0.12185,0.13284,0.12447,0.12999,0.13246,0.118  
91,0.13658,0.34137,0.35732,0.35408,0.36347,0.3516,0.34838,0.36413,0.19  
481,0.2245,0.22056,0.19732,0.21895,0.19804,0.21502,0.2192,0.19567,0.20  
231,0.2136,0.19528,0.20919,0.12267,0.14128,0.12194,0.11178,0.098099,0.  
10438,0.10854,0.12223,0.12285,0.12231,0.12391,0.12193,0.12325,0.12309,  
0.12258,0.11776,0.091587,0.12913,0.36052,0.35981,0.35599,0.36015,0.347  
84,0.36237,0.21058,0.20513,0.1945,0.1581,0.18016,0.2027,0.18618,0.2112  
8,0.17696,0.18791,0.19467,0.2093,0.20904,0.21727,0.12387,0.11828,0.122

27,0.11811,0.1076,0.12862,0.11756,0.096496,0.12547,0.11691,0.1315,0.10  
599,0.1158,0.12517,0.11652,0.12184,0.11759,0.10381,0.35881,0.36295,0.3  
5984,0.36477,0.36744,0.18953,0.20154,0.19685,0.19334,0.18915,0.20349,0  
.18066,0.18087,0.22216,0.18653,0.20262,0.20056,0.19951,0.20247,0.20412  
,0.12074,0.11448,0.12935,0.12231,0.12252,0.12552,0.13977,0.12444,0.115  
85,0.12329,0.12053,0.11364,0.12193,0.11906,0.12052,0.12277,0.13296,0.1  
2862,0.35375,0.35827,0.34721,0.19259,0.19427,0.19479,0.19855,0.20718,0  
.19094,0.20682,0.17098,0.20387,0.19578,0.19912,0.16898,0.18466,0.20594  
,0.20018,0.17481,0.19977,0.1581,0.12613,0.12276,0.12265,0.12265,0.1223  
6,0.11639,0.12287,0.13829,0.11942,0.12749,0.11021,0.12305,0.10953,0.09  
059,0.12551,0.12965,0.12139,0.35929,0.21192,0.20803,0.19029,0.1953,0.2  
2698,0.19644,0.2209,0.20122,0.1888,0.16932,0.19913,0.20692,0.19435,0.1  
8607,0.19989,0.19804,0.19103,0.1942,0.12726,0.12093,0.11705,0.11052,0.  
12185,0.12292,0.11882,0.11141,0.12204,0.12713,0.12204,0.12214,0.12254,  
0.11292,0.10496,0.12608,0.12298,0.04047,0.18104,0.19966,0.18465,0.1394  
5,0.21849,0.14,0.17463,0.2063,0.20818,0.19584,0.19686,0.21906,0.20913,  
0.17573,0.19423,0.23591,0.20116,0.20378,0.19324,0.12786,0.12456,0.1237  
9,0.12749,0.12436,0.13842,0.12504,0.10705,0.12214,0.10199,0.12243,0.12  
218,0.13052,0.11716,0.1225,0.12678,0.12248,0.039814,0.21693,0.23649,0.  
20594,0.19725,0.15994,0.19752,0.19905,0.19777,0.20131,0.20235,0.23122,  
0.19513,0.20323,0.201,0.20183,0.21188,0.19753,0.19331,0.12219,0.11425,  
0.11375,0.13864,0.12496,0.13803,0.12223,0.13043,0.12343,0.12204,0.1155  
5,0.12195,0.12531,0.10808,0.1226,0.1215,0.11465,0.11761,0.039653,0.214  
86,0.20232,0.14102,0.18059,0.20861,0.19326,0.20337,0.19732,0.19626,0.1  
9786,0.19652,0.17513,0.20056,0.20055,0.20312,0.18783,0.18817,0.21402,0  
.11405,0.12212,0.15038,0.12188,0.1326,0.12243,0.12408,0.12105,0.11109,  
0.13272,0.12234,0.11317,0.12696,0.12034,0.12225,0.12319,0.14807,0.0403  
73,0.039945,0.040023,0.26049,0.18748,0.19652,0.20096,0.23202,0.21481,0  
.19941,0.19861,0.17773,0.20402,0.1814,0.18772,0.2111,0.20488,0.20285,0  
.11377,0.12245,0.12274,0.13911,0.095725,0.10835,0.13172,0.1274,0.105,0  
.11987,0.12392,0.12542,0.11084,0.13504,0.065592,0.10914,0.13769,0.1263  
2,0.040022,0.040423,0.040468,0.039954,0.19256,0.23072,0.2198,0.18871,0  
.19832,0.16694,0.18465,0.17981,0.20281,0.16588,0.20274,0.18845,0.11246  
,0.12195,0.17578,0.11676,0.11416,0.11939,0.11808,0.12219,0.14101,0.124  
72,0.12243,0.13509,0.11635,0.12284,0.16389,0.12835,0.1226,0.12798,0.12  
234,0.12811,0.040406,0.039612,0.039993,0.040309,0.040434,0.040687,0.22  
153,0.23462,0.20102,0.19589,0.26918,0.1732,0.20444,0.20337,0.14222,0.1  
2475,0.13438,0.12657,0.12467,0.12706,0.14411,0.12239,0.12045,0.12566,0  
.12284,0.1338,0.12431,0.1182,0.10987,0.11637,0.11249,0.12219,0.12182,0  
.11476,0.12253,0.1224,0.11226,0.040244,0.040619,0.040332,0.040497,0.04  
0445,0.039658,0.20024,0.19557,0.21764,0.20797,0.20866,0.040077,0.04036  
3,0.11959,0.12522,0.10751,0.12237,0.12249,0.12248,0.12231,0.12184,0.12  
239,0.12805,0.12154,0.12619,0.12218,0.15674,0.14793,0.11738,0.12727,0.  
12182,0.1268,0.12221,0.1222,0.040242,0.040424,0.039985,0.040638,0.0415  
21,0.039452,0.039413,0.03967,0.040332,0.039937,0.19645,0.21844,0.03991  
8,0.039397,0.039538,0.040356,0.12894,0.1035,0.13037,0.11613,0.11612,0.  
13718,0.12273,0.12195,0.12197,0.12222,0.12123,0.1315,0.12231,0.12245,0  
.13128,0.12552,0.12192,0.12659,0.11407,0.039738,0.039565,0.040344,0.03  
9695,0.039866,0.040248,0.040307,0.039773,0.04051,0.041026,0.039921,0.0  
40005,0.040038,0.040448,0.040026,0.039365,0.039709,0.12319,0.1221,0.12  
218,0.10972,0.12789,0.10849,0.11741,0.12223,0.12383,0.13421,0.12514,0.  
12265,0.13363,0.13107,0.12727,0.11956,0.040022,0.040355,0.040088,0.039

72,0.039903,0.040783,0.03988,0.04022,0.039994,0.04044,0.03959,0.040301  
,0.039587,0.039793,0.040419,0.040232,0.040388,0.039944,0.040237,0.1080  
2,0.12317,0.14096,0.12323,0.11013,0.12285,0.12738,0.12554,0.12277,0.12  
35,0.12982,0.12238,0.14699,0.040628,0.03931,0.040649,0.039395,0.040213  
,0.039988,0.039683,0.039839,0.040315,0.039984,0.040156,0.040514,0.0401  
69,0.040386,0.039711,0.04009,0.039758,0.039807,0.0401,0.040338,0.04029  
7,0.12253,0.10752,0.11967,0.11969,0.12015,0.089472,0.12293,0.12268,0.1  
2035,0.040179,0.040558,0.03995,0.040321,0.039543,0.039917,0.04011,0.03  
9797,0.040089,0.040288,0.039615,0.040424,0.039827,0.039996,0.040759,0.  
040773,0.040229,0.040082,0.039733,0.040301,0.040286,0.039867,0.040176,  
0.040179,0.039707,0.10624,0.1254,0.13149,0.099172,0.039489,0.03999,0.0  
39843,0.040704,0.040192,0.040867,0.040217,0.03956,0.040418,0.039262,0.  
039895,0.040911,0.040052,0.040233,0.040124,0.039943,0.040564,0.040379,  
0.040005,0.039921,0.039903,0.040252,0.039978,0.040378,0.040499,0.03971  
5,0.039718,0.040099,0.04019,0.040836,0.040149,0.03963,0.03968,0.040516  
,0.039758,0.039765,0.040051,0.040313,0.040047,0.040765,0.04052,0.03985  
4,0.040338,0.039772,0.039923,0.040228,0.039866,0.040285,0.040143,0.039  
916,0.040093,0.040271,0.039527,0.040242,0.040539,0.039745,0.039751,0.0  
40113,0.039317,0.039372,0.040925,0.039454,0.040379,0.039125,0.04075,0.  
039835,0.040345,0.040192,0.039745,0.040145,0.039625,0.040171,0.04033,0  
.040178,0.039755,0.040024,0.040432,0.040263,0.0401,0.039753,0.039884,0  
.039676,0.039923,0.039665,0.040003,0.040783,0.040475,0.040372,0.040391  
,0.040338,0.039775,0.040375,0.040385,0.039792,0.040065,0.03927,0.04017  
4,0.039325,0.040678,0.040487,0.040098,0.039794,0.040263,0.040738,0.040  
188,0.041005,0.040101,0.040245,0.04054,0.040178,0.040023,0.040384,0.04  
0169,0.039539,0.040577,0.039806,0.039942,0.040283,0.040147,0.040397,0.  
039723,0.039722,0.040623,0.04052,0.040119,0.040443,0.040238,0.039875,0  
.040126,0.039947,0.040112,0.040916,0.039908,0.040328,0.040122,0.039207  
,0.040452,0.039714,0.040333,0.040089,0.040378,0.040043,0.039893,0.0405  
94,0.039723,0.040314,0.039208,0.040539,0.039533,0.039837,0.040257,0.03  
997,0.039994,0.040474,0.040156,0.039276,0.039583,0.039758,0.039717,0.0  
39694,0.040337,0.040596,0.039982,0.04104,0.039289,0.039894,0.040455,0.  
041312,0.039772,0.040183,0.040377,0.039788,0.03954,0.039437,0.040171,0  
.04068,0.03986,0.040372,0.039536,0.039078,0.040157,0.04041,0.040421,0.  
039548,0.040085,0.040283,0.039437,0.040213,0.040011,0.040333,0.04005,0  
.040432,0.040214,0.040387,0.039746

#simdataS3SNR10:

Kep\_f=1.2

Kep\_f=1.2

Kep\_s=0.5

Ktrans\_f=0.05

Ktrans\_s=0.06

del\_t=0.5

gtSf=0

|   |   |   |   |   |   |   |   |
|---|---|---|---|---|---|---|---|
| 0 | 0 | 0 | 0 | 0 | 0 | 0 | 0 |
| 0 | 0 | 0 | 0 | 0 | 0 | 0 | 0 |
| 0 | 0 | 0 | 0 | 0 | 0 | 0 | 0 |
| 0 | 0 | 0 | 0 | 0 | 0 | 0 | 0 |
| 0 | 0 | 0 | 0 | 0 | 0 | 0 | 0 |

|         |         |         |         |         |         |         |
|---------|---------|---------|---------|---------|---------|---------|
| 0       | 0       | 0       | 0       | 0       | 0       | 0       |
| 0       | 0       | 0       | 0       | 0       | 0       | 0       |
| 0       | 0       | 0       | 0       | 0       | 0       | 0       |
| 0       | 0       | 0       | 0       | 0       | 0       | 0       |
| 0       | 0       | 0       | 0       | 0       | 0       | 0       |
| 0       | 0       | 0       | 0       | 0       | 0       | 0       |
| 0       | 0       | 0       | 0       | 0       | 0       | 0       |
| 0       | 0       | 0       | 0       | 0       | 0       | 0       |
| 0       | 0       | 0       | 0       | 0       | 0       | 0       |
| 0       | 0       | 0       | 0       | 0       | 0       | 0       |
| 0       | 0       | 0       | 0       | 0       | 0       | 0       |
| 0       | 0       | 0       | 0       | 0       | 0       | 0       |
| 0       | 0       | 0       | 0       | 0       | 0       | 0       |
| 0       | 0       | 0       | 0       | 0       | 0       | 0       |
| 0       | 0       | 0       | 0       | 0       | 0       | 0       |
| 0       | 0       | 0       | 0       | 0       | 0       | 0       |
| 0       | 0       | 0       | 0       | 0       | 0       | 0       |
| 0       | 0       | 0       | 0       | 0       | 0       | 0       |
| 0       | 0       | 0       | 0       | 0       | 0       | 0       |
| 0       | 0       | 0       | 0       | 0       | 0       | 0       |
| 0       | 0       | 0       | 0       | 0       | 0       | 0       |
| 0       | 0       | 0       | 0       | 0       | 0       | 0       |
| 0       | 0       | 0       | 0       | 0       | 0       | 0       |
| 0       | 0       | 0       | 0       | 0       | 0       | 0       |
| 0       | 0       | 0       | 0       | 0       | 0       | 0       |
| 0       | 0       | 0       | 0       | 0       | 0       | 0       |
| 0       | 0       | 0       | 0.54646 | 0.5     | 0.39276 | 0       |
| 0       | 0       | 0       | 0       | 0       | 0       | 0       |
| 0       | 0       | 0       | 0       | 0       | 0       | 0       |
| 0       | 0       | 0       | 0       | 0       | 0       | 0       |
| 0       | 0       | 0       | 0       | 0       | 0       | 0       |
| 0       | 0       | 0       | 0       | 0       | 0       | 0       |
| 0       | 0       | 0       | 0       | 0       | 0       | 0       |
| 0       | 0       | 0       | 0       | 0       | 0       | 0       |
| 0.44584 | 0.46383 | 0.5     | 0.51113 | 0.56762 | 0.53348 | 0       |
| 0       | 0       | 0       | 0       | 0       | 0       | 0       |
| 0       | 0       | 0       | 0       | 0       | 0       | 0       |
| 0       | 0       | 0       | 0       | 0       | 0       | 0       |
| 0       | 0       | 0       | 0       | 0       | 0       | 0       |
| 0.54478 | 0.5     | 0.53371 | 0.28144 | 0.5     | 0.38325 | 0.49852 |
| 0.49729 | 0       | 0       | 0       | 0       | 0       | 0       |
| 0       | 0       | 0       | 0       | 0       | 0       | 0       |
| 0       | 0       | 0       | 0       | 0       | 0       | 0       |
| 0       | 0       | 0       | 0       | 0       | 0       | 0       |
| 0.52162 | 0.5     | 0.5     | 0.49537 | 0.5     | 0.45915 | 0       |
| 0.52311 | 0.75961 | 0.5     | 0       | 0       | 0       | 0       |
| 0       | 0       | 0       | 0       | 0       | 0       | 0       |
| 0       | 0       | 0       | 0       | 0       | 0       | 0       |
| 0       | 0       | 0       | 0       | 0       | 0       | 0       |
| 0       | 0.6344  | 0.50947 | 0.50073 | 0.47209 | 0.61584 | 0       |

|         |         |         |         |         |         |
|---------|---------|---------|---------|---------|---------|
| 0.46036 | 0.57387 | 0.57631 | 0.61434 | 0.34181 | 0.5886  |
| 0.48045 | 0.47081 | 0.55011 | 0.51746 | 0       | 0       |
| 0       | 0       | 0       | 0       | 0       | 0       |
| 0       | 0       | 0       | 0       | 0       | 0       |
| 0       | 0       | 0       | 0       | 0       | 0       |
| 0.5     | 0.53447 | 0.45907 | 0.51233 | 0.53238 | 0.5     |
| 0.45961 | 0.5     | 0.42994 | 0.54163 | 0.51158 | 0.48692 |
| 0.53489 | 0.49568 | 0.45304 | 0.37631 | 0.50009 | 0.43575 |
| 0       | 0       | 0       | 0       | 0       | 0       |
| 0       | 0       | 0       | 0       | 0       | 0.31154 |
| 0.36777 | 0.358   | 0.38928 | 0.32821 | 0.3642  | 0.23551 |
| 0.32054 | 0.37227 | 0.42075 | 0.5     | 0.47413 | 0.50949 |
| 0.67391 | 0.53633 | 0.35166 | 0.616   | 0.47204 | 0.48637 |
| 0.55731 | 0.5     | 0.53167 | 0.5     | 0.5     | 0.5     |
| 0.61154 | 0.44864 | 0       | 0       | 0       | 0       |
| 0       | 0       | 0       | 0       | 0       | 0.50979 |
| 0.30608 | 0.30325 | 0.30824 | 0.37791 | 0.31566 | 0.32955 |
| 0.33333 | 0.35523 | 0.24284 | 0.37714 | 0.5     | 0.57556 |
| 0.50384 | 0.48481 | 0.49398 | 0.49919 | 0.5     | 0.58813 |
| 0.56114 | 0.5     | 0.5     | 0.52499 | 0.48749 | 0.5     |
| 0.41353 | 0.50683 | 0.47339 | 0.51589 | 0       | 0       |
| 0       | 0       | 0       | 0       | 0       | 0.5852  |
| 0.50861 | 0.5     | 0.38093 | 0.35364 | 0.31605 | 0.33333 |
| 0.34399 | 0.31247 | 0.23573 | 0.30671 | 0.33788 | 0.38032 |
| 0.48765 | 0.46539 | 0.45214 | 0.4719  | 0.5     | 0.5     |
| 0.57871 | 0.43472 | 0.50256 | 0.56993 | 0.49462 | 0.47866 |
| 0.46084 | 0.5681  | 0.5     | 0.45497 | 0.52053 | 0.5     |
| 0       | 0       | 0       | 0       | 0       | 0       |
| 0.5454  | 0.50724 | 0.51469 | 0.39959 | 0.5     | 0.22765 |
| 0.33333 | 0.37247 | 0.36712 | 0.39398 | 0.36588 | 0.35049 |
| 0.3562  | 0.33333 | 0.37927 | 0.60311 | 0.63661 | 0.50067 |
| 0.5     | 0.53067 | 0.48416 | 0.37404 | 0.4479  | 0.41038 |
| 0.49375 | 0.5     | 0.5     | 0.5     | 0.53668 | 0.49848 |
| 0.50949 | 0.51956 | 0       | 0       | 0       | 0       |
| 0       | 0.51737 | 0.57798 | 0.5     | 0.49148 | 0.54838 |
| 0.55727 | 0.34781 | 0.36684 | 0.3323  | 0.36789 | 0.35807 |
| 0.32029 | 0.40501 | 0.29761 | 0.39126 | 0.4442  | 0.5     |
| 0.50459 | 0.31002 | 0.54145 | 0.61553 | 0.49278 | 0.60572 |
| 0.43713 | 0.48576 | 0.56039 | 0.52535 | 0.57678 | 0.5     |
| 0.43683 | 0.5     | 0.50791 | 0.58356 | 0       | 0       |
| 0       | 0.47972 | 0.64854 | 0.5     | 0.58805 | 0.5     |
| 0.51733 | 0.49843 | 0.405   | 0.33333 | 0.34441 | 0.4117  |
| 0.23495 | 0.34315 | 0.34384 | 0.36471 | 0.33333 | 0.30441 |
| 0.64163 | 0.52829 | 0.5219  | 0.5     | 0.53472 | 0.42198 |
| 0.54419 | 0.40118 | 0.43383 | 0.5     | 0.5     | 0.5     |
| 0.5     | 0.48653 | 0.59409 | 0.53148 | 0.56004 | 0.54895 |
| 0       | 0.49933 | 0.4737  | 0.53923 | 0.37901 | 0.55225 |
| 0.5     | 0.47206 | 0.39465 | 0.43667 | 0.29272 | 0.33892 |
| 0.34251 | 0.33333 | 0.39124 | 0.30691 | 0.37163 | 0.33333 |
| 0.33333 | 0.53194 | 0.5     | 0.41976 | 0.49013 | 0.50595 |
| 0.61588 | 0.5     | 0.53589 | 0.55175 | 0.5     | 0.46672 |
| 0.47552 | 0.52234 | 0.5     | 0.37917 | 0.5     | 0.5     |



|         |         |         |         |         |         |
|---------|---------|---------|---------|---------|---------|
| 1       | 0.4919  | 0.47418 | 0.49955 | 0.48775 | 0.5     |
| 0.57915 | 0.5     | 0.59622 | 0.49846 | 0.45356 | 0.33333 |
| 0.34074 | 0.3101  | 0.37456 | 0.31798 | 0.35905 | 0.28081 |
| 0.33333 | 0.3388  | 0.5     | 0.52492 | 0.59945 | 0.5     |
| 0.44122 | 0.38061 | 0.51907 | 0.46979 | 0.5     | 0.53191 |
| 0.55503 | 0.50234 | 0.5     | 0.42755 | 0.56282 | 0.59359 |
| 0.5     | 1       | 0.54385 | 0.53798 | 0.4377  | 0.56751 |
| 0.57555 | 0.5     | 0.5     | 0.44848 | 0.45216 | 0.52551 |
| 0.34103 | 0.33439 | 0.30016 | 0.34136 | 0.37616 | 0.33333 |
| 0.36788 | 0.37327 | 0.5069  | 0.6826  | 0.5     | 0.49818 |
| 0.48358 | 0.5     | 0.56082 | 0.49615 | 0.5     | 0.51084 |
| 0.5337  | 0.31577 | 0.41859 | 0.43801 | 0.5     | 0.40923 |
| 0.5     | 0.52971 | 1       | 0.41618 | 0.60028 | 0.52998 |
| 0.5     | 0.52612 | 0.71134 | 0.52067 | 0.52062 | 0.56603 |
| 0.39399 | 0.3426  | 0.33865 | 0.37501 | 0.33871 | 0.33864 |
| 0.31682 | 0.391   | 0.338   | 0.5     | 0.44441 | 0.49258 |
| 0.53031 | 0.5     | 0.48962 | 0.498   | 0.44874 | 0.4956  |
| 0.5     | 0.4101  | 0.52035 | 0.5     | 0.54431 | 0.5     |
| 0.5     | 0.57103 | 1       | 1       | 1       | 0.49563 |
| 0.5     | 0.43756 | 0.5     | 0.42468 | 0.54259 | 0.52437 |
| 0.61232 | 0.5     | 0.39147 | 0.34681 | 0.33333 | 0.32584 |
| 0.30845 | 0.3468  | 0.46293 | 0.5     | 0.5     | 0.49354 |
| 0.5     | 0.56043 | 0.51789 | 0.55738 | 0.28035 | 0.52908 |
| 0.50909 | 0.5     | 0.52628 | 0.33948 | 0.5     | 0.5     |
| 0.50732 | 0.44732 | 1       | 1       | 1       | 1       |
| 0.52103 | 0.5     | 0.60017 | 0.54755 | 0.5     | 0.5     |
| 0.5     | 0.5     | 0.5     | 0.36817 | 0.282   | 0.34995 |
| 0.48826 | 0.5     | 0.4601  | 0.54027 | 0.4705  | 0.62429 |
| 0.54084 | 0.47939 | 0.5     | 0.5     | 0.5     | 0.5     |
| 0.52109 | 0.35258 | 0.5003  | 0.40036 | 0.5     | 0.42149 |
| 0.5     | 0.55536 | 1       | 1       | 1       | 1       |
| 1       | 1       | 0.5     | 0.49192 | 0.38241 | 0.5105  |
| 0.45211 | 0.5     | 0.38901 | 0.4831  | 0.5     | 0.55473 |
| 0.53201 | 0.6056  | 0.59459 | 0.53767 | 0.45708 | 0.45828 |
| 0.4588  | 0.52007 | 0.32922 | 0.67042 | 0.37071 | 0.47436 |
| 0.5     | 0.53644 | 0.5     | 0.44708 | 0.49797 | 0.52102 |
| 0.52157 | 0.40909 | 0.5     | 1       | 1       | 1       |
| 1       | 1       | 1       | 0.49348 | 0.5     | 0.62486 |
| 0.4567  | 0.54933 | 1       | 1       | 0.449   | 0.47658 |
| 0.43828 | 0.5     | 0.5     | 0.46881 | 0.55145 | 0.52092 |
| 0.52486 | 0.454   | 0.56766 | 0.42881 | 0.45759 | 0.46864 |
| 0.652   | 0.56728 | 0.44835 | 0.46177 | 0.54074 | 0.5755  |
| 0.5139  | 1       | 1       | 1       | 1       | 1       |
| 1       | 1       | 1       | 1       | 1       | 0.50684 |
| 0.5     | 1       | 1       | 1       | 1       | 0.43978 |
| 0.51421 | 0.54258 | 0.48775 | 0.5     | 0.50285 | 0.6063  |
| 0.40998 | 0.45427 | 0.46203 | 0.42881 | 0.55452 | 0.5     |
| 0.47741 | 0.5     | 0.48833 | 0.53565 | 0.53573 | 0.55342 |
| 1       | 1       | 1       | 1       | 1       | 1       |
| 1       | 1       | 1       | 1       | 1       | 1       |
| 1       | 1       | 1       | 1       | 1       | 0.44529 |
| 0.5     | 0.42246 | 0.51976 | 0.5     | 0.52067 | 0.5     |



|         |         |         |         |         |         |   |
|---------|---------|---------|---------|---------|---------|---|
| 1       | 1       | 1       | 1       | 1       | 1       | 1 |
| 1       | 1       | 0.50207 | 0.40829 | 0.38328 | 0.54994 |   |
| 1       | 1       | 1       | 1       | 1       | 1       |   |
| 1       | 1       | 1       | 1       | 1       | 1       |   |
| 1       | 1       | 1       | 0       | 0.45469 | 0.48074 |   |
| 0.51895 | 0.54355 | 0.46843 | 0.42607 |         | 1       | 1 |
| 1       | 1       | 1       | 1       | 1       | 1       |   |
| 1       | 1       | 1       | 1       | 1       | 1       |   |
| 1       | 0       | 0       | 0.46656 | 0.5     | 0.47207 |   |
| 0.37308 | 0.44404 | 0.39438 | 0.39568 | 0.42568 |         | 1 |
| 1       | 1       | 1       | 1       | 1       | 1       |   |
| 1       | 1       | 1       | 1       | 1       | 1       |   |
| 1       | 1       | 0       | 0       | 0       | 0.5     |   |
| 0.5     | 0.48752 | 0.5     | 0.5     | 0.56048 | 0.43555 |   |
| 0.50089 | 0.5     | 1       | 1       | 1       | 1       | 1 |
| 1       | 1       | 1       | 1       | 1       | 1       |   |
| 1       | 1       | 1       | 1       | 1       | 1       |   |
| 0       | 0       | 0       | 0       | 0.52099 | 0.5     |   |
| 0.51519 | 0.46038 | 0.5     | 0.51167 | 0.43167 | 0.47268 |   |
| 0.54606 | 0.54996 | 1       | 1       | 1       | 1       | 1 |
| 1       | 1       | 1       | 1       | 1       | 1       |   |
| 1       | 1       | 1       | 1       | 1       | 1       |   |
| 0       | 0       | 0       | 0       | 0       | 0       |   |
| 0.54309 | 0.47991 | 0.48613 | 0.49144 | 0.5     | 0.48666 |   |
| 0.51563 | 0.43449 | 0.50499 | 0.50461 | 1       | 1       | 1 |
| 1       | 1       | 1       | 1       | 1       | 1       |   |
| 1       | 1       | 1       | 1       | 1       | 1       |   |
| 1       | 1       | 1       | 0       | 0       | 0       |   |
| 0       | 0       | 0       | 0.44225 | 0.50346 | 0.54333 |   |
| 0.5     | 0.44084 | 0.68603 | 0.56744 | 0.43661 | 0.50877 |   |
| 0.47318 | 0.60787 | 1       | 1       | 1       | 1       | 1 |
| 1       | 1       | 1       | 1       | 1       | 1       |   |
| 1       | 1       | 1       | 0.45354 | 0.5     | 0.60724 |   |
| 1       | 0       | 0       | 0       | 0       | 0       |   |
| 0       | 0       | 0.49005 | 0.5     | 0.5     | 0.56446 |   |
| 0.51202 | 0.5     | 0.43494 | 0.5     | 0.54847 | 0.64762 |   |
| 0.54    | 1       | 1       | 1       | 1       | 1       | 1 |
| 1       | 1       | 1       | 1       | 1       | 1       |   |
| 0.55416 | 0.53617 | 0.5     | 0.48887 | 0.43238 | 0.46652 |   |
| 1       | 0       | 0       | 0       | 0       | 0       |   |
| 0       | 0       | 0.48918 | 0.6528  | 0.5042  | 0.39564 |   |
| 0.5     | 0.52547 | 0.46367 | 0.49272 | 0.39506 | 0.53249 |   |
| 0.36445 | 1       | 1       | 1       | 1       | 1       | 1 |
| 1       | 1       | 1       | 1       | 0.5     | 0.61675 |   |
| 0.45522 | 0.5     | 0.46629 | 0.71856 | 0.5     | 0.50148 |   |
| 0.50271 | 1       | 0       | 0       | 0       | 0       | 0 |
| 0       | 0       | 0       | 0.38981 | 0.63274 | 0.48456 |   |
| 0.5     | 0.63986 | 0.50189 | 0.55684 | 0.5     | 0.63469 |   |
| 0.49983 | 0.58084 | 0.5     | 1       | 1       | 1       | 1 |
| 1       | 1       | 1       | 0.71107 | 0.51201 | 0.5317  |   |
| 0.47838 | 0.5     | 0.5     | 0.50463 | 0.5     | 0.54085 |   |
| 0.47689 | 0.24039 | 0.5     | 0       | 0       | 0       | 0 |

|         |         |         |         |         |         |  |
|---------|---------|---------|---------|---------|---------|--|
| 0       | 0       | 0       | 0       | 0.53018 | 0.49793 |  |
| 0.49869 | 0.52717 | 0.30603 | 0.48818 | 0.524   | 0.5599  |  |
| 0.5     | 0.49519 | 0.5     | 0.52211 | 1       | 1       |  |
| 1       | 0.3656  | 0.49053 | 0.49927 | 0.52791 | 0.38416 |  |
| 0.53964 | 0.42613 | 0.42369 | 0.38566 | 0.65819 | 0.4114  |  |
| 0.51955 | 0.52919 | 0.44989 | 0.48254 | 0       | 0       |  |
| 0       | 0       | 0       | 0       | 0       | 0       |  |
| 0       | 0.5     | 0.48915 | 0.53103 | 0.50502 | 0.39447 |  |
| 0.5     | 0.5     | 0.5     | 0.46865 | 0.42711 | 0.44138 |  |
| 0.5     | 0.46553 | 0.54093 | 0.48767 | 0.46762 | 0.5     |  |
| 0.54039 | 0.5     | 0.57006 | 0.45837 | 0.48842 | 0.51308 |  |
| 0.46511 | 0.50432 | 0.54696 | 0.62369 | 0.49991 | 0.56425 |  |
| 0       | 0       | 0       | 0       | 0       | 0       |  |
| 0       | 0       | 0       | 0.54867 | 0.43191 | 0.34423 |  |
| 0.36777 | 0.284   | 0.3782  | 0.34098 | 0.40604 | 0.36274 |  |
| 0.35455 | 0.37227 | 0.57925 | 0.5     | 0.52587 | 0.49051 |  |
| 0.32609 | 0.46367 | 0.64834 | 0.384   | 0.52796 | 0.51363 |  |
| 0.44269 | 0.5     | 0.46833 | 0.5     | 0.5     | 0.5     |  |
| 0.38846 | 0.55136 | 0       | 0       | 0       | 0       |  |
| 0       | 0       | 0       | 0       | 0       | 0       |  |
| 0.34696 | 0.33686 | 0.34588 | 0.31156 | 0.41223 | 0.37962 |  |
| 0.33333 | 0.22085 | 0.46623 | 0.37714 | 0.5     | 0.42444 |  |
| 0.49616 | 0.51519 | 0.50602 | 0.50081 | 0.5     | 0.41187 |  |
| 0.43886 | 0.5     | 0.5     | 0.47501 | 0.51251 | 0.5     |  |
| 0.58647 | 0.49317 | 0.52661 | 0.48411 | 0       | 0       |  |
| 0       | 0       | 0       | 0       | 0       | 0       |  |
| 0       | 0       | 0.23814 | 0.35364 | 0.34197 | 0.33333 |  |
| 0.31203 | 0.35148 | 0.37652 | 0.34664 | 0.32423 | 0.38032 |  |
| 0.51235 | 0.53461 | 0.54786 | 0.5281  | 0.5     | 0.5     |  |
| 0.42129 | 0.56528 | 0.49744 | 0.43007 | 0.50538 | 0.52134 |  |
| 0.53916 | 0.4319  | 0.5     | 0.54503 | 0.47947 | 0.5     |  |
| 0       | 0       | 0       | 0       | 0       | 0       |  |
| 0       | 0       | 0       | 0       | 0       | 0.38617 |  |
| 0.33333 | 0.33783 | 0.32102 | 0.21205 | 0.25706 | 0.25428 |  |
| 0.2876  | 0.33333 | 0.62073 | 0.39689 | 0.36339 | 0.49933 |  |
| 0.5     | 0.46933 | 0.51584 | 0.62596 | 0.5521  | 0.58962 |  |
| 0.50625 | 0.5     | 0.5     | 0.5     | 0.46332 | 0.50152 |  |
| 0.49051 | 0.48044 | 0       | 0       | 0       | 0       |  |
| 0       | 0       | 0       | 0       | 0       | 0       |  |
| 0       | 0.34781 | 0.31593 | 0.3511  | 0.33867 | 0.27313 |  |
| 0.33462 | 0.20273 | 0.3512  | 0.20192 | 0.5558  | 0.5     |  |
| 0.49541 | 0.68998 | 0.45855 | 0.38447 | 0.50722 | 0.39428 |  |
| 0.56287 | 0.51424 | 0.43961 | 0.47465 | 0.42322 | 0.5     |  |
| 0.56317 | 0.5     | 0.49209 | 0.41644 | 0       | 0       |  |
| 0       | 0       | 0       | 0       | 0       | 0       |  |
| 0       | 0       | 0       | 0.33333 | 0.31893 | 0.34402 |  |
| 0.38253 | 0.3598  | 0.30878 | 0.27058 | 0.33333 | 0.3863  |  |
| 0.35837 | 0.47171 | 0.4781  | 0.5     | 0.46528 | 0.57802 |  |
| 0.45581 | 0.59882 | 0.56617 | 0.5     | 0.5     | 0.5     |  |
| 0.5     | 0.51347 | 0.40591 | 0.46852 | 0.43996 | 0.45105 |  |
| 0       | 0       | 0       | 0       | 0       | 0       |  |
| 0       | 0       | 0       | 0       | 0.35364 | 0.33892 |  |

|         |         |         |         |         |         |
|---------|---------|---------|---------|---------|---------|
| 0.31498 | 0.33333 | 0.38541 | 0.39357 | 0.25673 | 0.33333 |
| 0.33333 | 0.46806 | 0.5     | 0.58024 | 0.50987 | 0.49405 |
| 0.38412 | 0.5     | 0.46411 | 0.44825 | 0.5     | 0.53328 |
| 0.52448 | 0.47766 | 0.5     | 0.62083 | 0.5     | 0.5     |
| 0       | 0       | 0       | 0       | 0       | 0       |
| 0       | 0       | 0       | 0       | 0       | 0.33333 |
| 0.34599 | 0.34495 | 0.28314 | 0.2987  | 0.38411 | 0.35959 |
| 0.33333 | 0.3388  | 0.5     | 0.47508 | 0.40055 | 0.5     |
| 0.55878 | 0.61939 | 0.48093 | 0.53021 | 0.5     | 0.46809 |
| 0.44497 | 0.49766 | 0.5     | 0.57245 | 0.43718 | 0.40641 |
| 0.5     | 0       | 0       | 0       | 0       | 0       |
| 0       | 0       | 0       | 0       | 0       | 0       |
| 0.41469 | 0.33439 | 0.38592 | 0.34311 | 0.27178 | 0.33333 |
| 0.26424 | 0.32092 | 0.4931  | 0.3174  | 0.5     | 0.50182 |
| 0.51642 | 0.5     | 0.43918 | 0.50385 | 0.5     | 0.48916 |
| 0.4663  | 0.68423 | 0.58141 | 0.56199 | 0.5     | 0.59077 |
| 0.5     | 0.47029 | 0       | 0       | 0       | 0       |
| 0       | 0       | 0       | 0       | 0       | 0       |
| 0       | 0.31479 | 0.33865 | 0.24998 | 0.33871 | 0.28763 |
| 0.32337 | 0.31475 | 0.338   | 0.5     | 0.55559 | 0.50742 |
| 0.46969 | 0.5     | 0.51038 | 0.502   | 0.55126 | 0.5044  |
| 0.5     | 0.5899  | 0.47965 | 0.5     | 0.45569 | 0.5     |
| 0.5     | 0.42897 | 0       | 0       | 0       | 0       |
| 0       | 0       | 0       | 0       | 0       | 0       |
| 0       | 0       | 0.29025 | 0.30637 | 0.33333 | 0.30787 |
| 0.23827 | 0.30641 | 0.53707 | 0.5     | 0.5     | 0.50646 |
| 0.5     | 0.43957 | 0.48211 | 0.44262 | 0.71965 | 0.47092 |
| 0.49091 | 0.5     | 0.47372 | 0.66052 | 0.5     | 0.5     |
| 0.49268 | 0.55268 | 0       | 0       | 0       | 0       |
| 0       | 0       | 0       | 0       | 0       | 0       |
| 0       | 0       | 0       | 0.26367 | 0.359   | 0.30011 |
| 0.51174 | 0.5     | 0.5399  | 0.45973 | 0.5295  | 0.37571 |
| 0.45916 | 0.52061 | 0.5     | 0.5     | 0.5     | 0.5     |
| 0.47891 | 0.64742 | 0.4997  | 0.59964 | 0.5     | 0.57851 |
| 0.5     | 0.44464 | 0       | 0       | 0       | 0       |
| 0       | 0       | 0       | 0       | 0       | 0       |
| 0       | 0       | 0       | 0       | 0.5     | 0.44527 |
| 0.46799 | 0.3944  | 0.40541 | 0.46233 | 0.54292 | 0.54172 |
| 0.5412  | 0.47993 | 0.67078 | 0.32958 | 0.62929 | 0.52564 |
| 0.5     | 0.46356 | 0.5     | 0.55292 | 0.50203 | 0.47898 |
| 0.47843 | 0.59091 | 0.5     | 0       | 0       | 0       |
| 0       | 0       | 0       | 0       | 0       | 0       |
| 0       | 0       | 0       | 0       | 0.551   | 0.52342 |
| 0.56172 | 0.5     | 0.5     | 0.53119 | 0.44855 | 0.47908 |
| 0.47514 | 0.546   | 0.43234 | 0.57119 | 0.54241 | 0.53136 |
| 0.348   | 0.43272 | 0.55165 | 0.53823 | 0.45926 | 0.4245  |
| 0.4861  | 0       | 0       | 0       | 0       | 0       |
| 0       | 0       | 0       | 0       | 0       | 0       |
| 0       | 0       | 0       | 0       | 0       | 0.56022 |
| 0.48579 | 0.45742 | 0.51225 | 0.5     | 0.49715 | 0.3937  |
| 0.59002 | 0.54573 | 0.53797 | 0.57119 | 0.44548 | 0.5     |
| 0.52259 | 0.5     | 0.51167 | 0.46435 | 0.46427 | 0.44658 |



|         |         |         |         |         |         |         |
|---------|---------|---------|---------|---------|---------|---------|
| 0       | 0       | 0       | 0       | 0       | 0       | 0       |
| 0       |         |         |         |         |         |         |
| gtSp=0  | 0       | 0       | 0       | 0       | 0       | 0       |
| 0       | 0       | 0       | 0       | 0       | 0       | 0       |
| 0       | 0       | 0       | 0       | 0       | 0       | 0       |
| 0       | 0       | 0.49793 | 0.59171 | 0.61672 | 0.45006 |         |
| 0       | 0       | 0       | 0       | 0       | 0       |         |
| 0       | 0       | 0       | 0       | 0       | 0       |         |
| 0       | 0       | 0       | 1       | 0.54531 | 0.51926 |         |
| 0.48105 | 0.45645 | 0.53157 | 0.57393 |         | 0       | 0       |
| 0       | 0       | 0       | 0       | 0       | 0       |         |
| 0       | 0       | 0       | 0       | 0       | 0       |         |
| 0       | 1       | 1       | 0.53344 | 0.5     | 0.52793 |         |
| 0.62692 | 0.55596 | 0.60562 | 0.60432 | 0.57432 |         | 0       |
| 0       | 0       | 0       | 0       | 0       | 0       |         |
| 0       | 0       | 0       | 0       | 0       | 0       |         |
| 0       | 0       | 1       | 1       | 1       | 0.5     |         |
| 0.5     | 0.51248 | 0.5     | 0.5     | 0.43952 | 0.56445 |         |
| 0.49911 | 0.5     |         | 0       | 0       | 0       | 0       |
| 0       | 0       | 0       | 0       | 0       | 0       |         |
| 0       | 0       | 0       | 0       | 0       | 0       |         |
| 1       | 1       | 1       | 1       | 0.47901 | 0.5     |         |
| 0.48481 | 0.53962 |         | 0.5     | 0.48833 | 0.56833 | 0.52732 |
| 0.45394 | 0.45004 |         | 0       | 0       | 0       | 0       |
| 0       | 0       | 0       | 0       | 0       | 0       |         |
| 0       | 0       | 0       | 0       | 0       | 0       |         |
| 1       | 1       | 1       | 1       | 1       | 1       | 1       |
| 0.45691 | 0.52009 | 0.51387 | 0.50856 |         | 0.5     | 0.51334 |
| 0.48437 | 0.56551 | 0.49501 | 0.49539 |         | 0       | 0       |
| 0       | 0       | 0       | 0       | 0       | 0       |         |
| 0       | 0       | 0       | 0       | 0       | 0       |         |
| 0       | 0       | 0       | 1       | 1       | 1       | 1       |
| 1       | 1       | 1       | 0.55775 | 0.49654 | 0.45667 |         |
| 0.5     | 0.55916 | 0.31397 | 0.43256 | 0.56339 | 0.49123 |         |
| 0.52682 | 0.39213 |         | 0       | 0       | 0       | 0       |
| 0       | 0       | 0       | 0       | 0       | 0       |         |
| 0       | 0       | 0       | 0       | 0       | 0       |         |
| 0       | 1       | 1       | 1       | 1       | 1       | 1       |
| 1       | 1       | 0.50995 | 0.5     | 0.5     | 0.43554 |         |
| 0.48798 |         | 0.5     | 0.56506 | 0.5     | 0.45153 | 0.35238 |
| 0.46    | 0       | 0       | 0       | 0       | 0       | 0       |
| 0       | 0       | 0       | 0       | 0       | 0       |         |
| 0       | 0       | 0       | 0       | 0       | 0       |         |
| 0       | 1       | 1       | 1       | 1       | 1       | 1       |
| 1       | 1       | 0.51082 | 0.3472  | 0.4958  | 0.60436 |         |
| 0.5     | 0.47453 | 0.53633 | 0.50728 | 0.60494 | 0.46751 |         |
| 0.63555 |         | 0       | 0       | 0       | 0       | 0       |
| 0       | 0       | 0       | 0       | 0       | 0       |         |
| 0       | 0       | 0       | 0       | 0       | 0       |         |
| 0       | 0       | 1       | 1       | 1       | 1       | 1       |
| 1       | 1       | 1       | 0.61019 | 0.36726 | 0.51544 |         |
| 0.5     | 0.36014 | 0.49811 | 0.44316 | 0.5     | 0.36531 |         |

|         |         |         |         |         |         |
|---------|---------|---------|---------|---------|---------|
| 0.50017 | 0.41916 | 0.5     | 0       | 0       | 0       |
| 0       | 0       | 0       | 0       | 0       | 0       |
| 0       | 0       | 0       | 0       | 0       | 0       |
| 0       | 0       | 0       | 1       | 1       | 1       |
| 1       | 1       | 1       | 1       | 0.46982 | 0.50207 |
| 0.50131 | 0.47283 | 0.69397 | 0.51182 | 0.476   | 0.4401  |
| 0.5     | 0.50481 | 0.5     | 0.47789 | 0       | 0       |
| 0       | 0       | 0       | 0       | 0       | 0       |
| 0       | 0       | 0       | 0       | 0       | 0       |
| 0       | 0       | 0       | 0       | 1       | 1       |
| 1       | 1       | 1       | 1       | 1       | 1       |
| 1       | 0.5     | 0.51085 | 0.46897 | 0.49498 | 0.60553 |
| 0.5     | 0.5     | 0.5     | 0.53135 | 0.57289 | 0.55862 |
| 0       | 0       | 0       | 0       | 0       | 0       |
| 0       | 0       | 0       | 0       | 0       | 0       |
| 0       | 0       | 0       | 0       | 0       | 0       |
| 1       | 1       | 1       | 1       | 1       | 1       |
| 1       | 1       | 1       | 0.45133 | 0.56809 | 0.34423 |
| 0.26447 | 0.358   | 0.23253 | 0.33081 | 0.22976 | 0.40174 |
| 0.32491 | 0.25546 | 0       | 0       | 0       | 0       |
| 0       | 0       | 0       | 0       | 0       | 0       |
| 0       | 0       | 0       | 0       | 0       | 0       |
| 0       | 0       | 1       | 1       | 1       | 1       |
| 1       | 1       | 1       | 1       | 1       | 0.49021 |
| 0.34696 | 0.35989 | 0.34588 | 0.31053 | 0.27211 | 0.29083 |
| 0.33333 | 0.42392 | 0.29093 | 0.24572 | 0       | 0       |
| 0       | 0       | 0       | 0       | 0       | 0       |
| 0       | 0       | 0       | 0       | 0       | 0       |
| 0       | 0       | 0       | 0       | 1       | 1       |
| 1       | 1       | 1       | 1       | 1       | 0.4148  |
| 0.49139 | 0.5     | 0.38093 | 0.29273 | 0.34197 | 0.33333 |
| 0.34399 | 0.33605 | 0.38775 | 0.34664 | 0.33788 | 0.23935 |
| 0       | 0       | 0       | 0       | 0       | 0       |
| 0       | 0       | 0       | 0       | 0       | 0       |
| 0       | 0       | 0       | 0       | 0       | 0       |
| 1       | 1       | 1       | 1       | 1       | 1       |
| 0.4546  | 0.49276 | 0.48531 | 0.60041 | 0.5     | 0.38617 |
| 0.33333 | 0.2897  | 0.31186 | 0.39398 | 0.37707 | 0.39523 |
| 0.3562  | 0.33333 | 0       | 0       | 0       | 0       |
| 0       | 0       | 0       | 0       | 0       | 0       |
| 0       | 0       | 0       | 0       | 0       | 0       |
| 0       | 0       | 1       | 1       | 1       | 1       |
| 1       | 0.48263 | 0.42202 | 0.5     | 0.50852 | 0.45162 |
| 0.44273 | 0.30439 | 0.31724 | 0.3166  | 0.29344 | 0.36881 |
| 0.34509 | 0.39226 | 0.3512  | 0.40682 | 0       | 0       |
| 0       | 0       | 0       | 0       | 0       | 0       |
| 0       | 0       | 0       | 0       | 0       | 0       |
| 0       | 0       | 0       | 0       | 1       | 1       |
| 1       | 0.52028 | 0.35146 | 0.5     | 0.41195 | 0.5     |
| 0.48267 | 0.50157 | 0.595   | 0.33333 | 0.33667 | 0.24428 |
| 0.38253 | 0.29705 | 0.34737 | 0.36471 | 0.33333 | 0.30929 |
| 0       | 0       | 0       | 0       | 0       | 0       |







|   |   |   |   |   |   |   |
|---|---|---|---|---|---|---|
| 0 | 0 | 0 | 0 | 0 | 0 | 0 |
| 0 | 0 | 0 | 0 | 0 | 0 | 0 |
| 0 | 0 | 0 | 0 | 0 | 0 | 0 |
| 0 | 0 | 0 | 0 | 0 | 0 | 0 |
| 0 | 0 | 0 | 0 | 0 | 0 | 0 |
| 0 | 0 | 0 | 0 | 0 | 0 | 0 |

gtTCf=

0  
0.11925  
0.14534  
0.13574  
0.11593  
0.096197  
0.079948  
0.067704  
0.058926  
0.052819  
0.048646  
0.045817  
0.043898  
0.042582  
0.041662  
0.040998  
0.040498  
0.040102

gtTCs=

0  
0.1431  
0.20732  
0.22864  
0.22778  
0.21648  
0.20118  
0.18528  
0.17042  
0.1573  
0.14609  
0.13672  
0.12898  
0.12264  
0.11746  
0.11324  
0.10979  
0.10696

gtTCp=

0  
2.385  
1.5979  
1.1196

0.8287  
0.65143  
0.54309  
0.47655  
0.43538  
0.4096  
0.39316  
0.38239  
0.37506  
0.36982  
0.36585  
0.36266  
0.35995  
0.35753

X\_mask=

2.2204e-016, 0.0026852, 2.2204e-016, 2.2204e-016, 0.006109, 0.0023182, 2.2204e-016, 2.2204e-016, 2.2204e-016, 2.2204e-016, 2.2204e-016, 0.0064992, 0.003362, 0.0027694, 2.2204e-016, 0.0014256, 0.011033, 0.0037964, 2.2204e-016, 2.2204e-016, 2.2204e-016, 2.2204e-016, 2.2204e-016, 2.2204e-016, 2.2204e-016, 2.2204e-016, 2.2204e-016, 0.009111, 2.2204e-016, 0.0047121, 2.2204e-016, 2.2204e-016, 0.0027031, 0.0089883, 0.0010095, 2.2204e-016, 0.0025831, 0.0043025, 0.00038202, 2.2204e-016, 2.2204e-016, 2.2204e-016, 2.2204e-016, 0.062313, 2.2204e-016, 2.2204e-016, 2.2204e-016, 2.2204e-016, 0.013631, 2.2204e-016, 2.2204e-016, 2.2204e-016, 2.2204e-016, 2.2204e-016, 2.2204e-016, 0.0014797, 2.2204e-016, 0.00012774, 0.0059836, 0.0078167, 0.0073677, 0.0059423, 0.0027517, 2.2204e-016, 2.2204e-016, 2.2204e-016, 0.013964, 0.032107, 0.034258, 2.2204e-016, 0.029295, 2.2204e-016, 2.2204e-016, 2.2204e-016, 2.2204e-016, 0.0011289, 2.2204e-016, 8.453e-005, 0.003534, 2.2204e-016, 0.010721, 0.0010298, 0.003641, 2.2204e-016, 0.0029991, 0.00073983, 2.2204e-016, 0.0070749, 0.0046709, 2.2204e-016, 0.1188, 2.2204e-016, 2.2204e-016, 0.04476, 0.015483, 0.014815, 0.0089749, 2.2204e-016, 0.010682, 0.008789, 2.2204e-016, 2.2204e-016, 0.0065183, 0.0083011, 2.2204e-016, 2.2204e-016, 0.0056229, 2.2204e-016, 2.2204e-016, 0.0042418, 2.2204e-016, 0.0008288, 2.2204e-016, 0.0033849, 2.2204e-016, 0.0012617, 2.2204e-016, 2.2204e-016, 0.036564, 2.2204e-016, 2.2204e-016, 0.018267, 2.2204e-016, 2.2204e-016, 0.010532, 0.024585, 2.2204e-016, 2.2204e-016, 0.068388, 2.2204e-016, 2.2204e-016, 2.2204e-016, 2.2204e-016, 2.2204e-016, 0.0027828, 2.2204e-016, 2.2204e-016, 0.00015563, 0.0033751, 2.2204e-016, 2.2204e-016, 0.0087735, 0.0038179, 2.2204e-016, 2.2204e-016, 2.2204e-016, 0.0014693, 2.2204e-016, 2.2204e-016, 0.09652, 2.2204e-016, 0.064601, 2.2204e-016, 2.2204e-016, 0.049097, 0.01279, 0.075246, 0.0088654, 0.020399, 0.053199, 0.028434, 0.037023, 2.2204e-016, 0.0068384, 0.00049006, 2.2204e-016, 2.2204e-016, 2.2204e-016, 0.0035251, 0.012821, 2.2204e-016, 0.00024772, 0.0033755, 0.010971, 0.0053976, 2.2204e-016, 2.2204e-016, 0.010683, 2.2204e-016, 2.2204e-016, 2.2204e-016, 2.2204e-016, 2.2204e-016, 2.2204e-016, 0.028328, 0.048445, 2.2204e-016, 2.2204e-016

016,0.0026874,0.027864,0.026831,0.036319,0.06113,2.2204e-016,2.2204e-016,2.2204e-016,2.2204e-016,0.046753,2.2204e-016,2.2204e-016,2.2204e-016,0.00016332,0.004623,2.2204e-016,2.2204e-016,0.0045427,2.2204e-016,2.2204e-016,0.0093047,0.0053244,0.0048977,0.0026653,0.0011354,0.0019828,0.0021463,2.2204e-016,2.2204e-016,2.2204e-016,0.0080972,2.2204e-016,0.19536,2.2204e-016,2.2204e-016,0.0028997,2.2204e-016,0.023231,2.2204e-016,0.0080536,2.2204e-016,0.012667,2.2204e-016,0.0092869,2.2204e-016,0.0030467,0.0066165,2.2204e-016,2.2204e-016,0.004169,2.2204e-016,2.2204e-016,0.006044,0.0031125,0.0007654,0.0031251,0.0046006,2.2204e-016,2.2204e-016,2.2204e-016,2.2204e-016,2.2204e-016,2.2204e-016,0.030166,2.2204e-016,0.033233,2.2204e-016,0.018008,2.2204e-016,0.037698,2.2204e-016,0.0088143,2.2204e-016,2.2204e-016,2.2204e-016,2.2204e-016,0.039295,2.2204e-016,2.2204e-016,0.013584,2.2204e-016,0.00040164,2.2204e-016,0.0071523,0.0012305,0.003069,2.2204e-016,2.2204e-016,2.2204e-016,2.2204e-016,0.0061888,0.0012227,0.0035317,2.2204e-016,2.2204e-016,0.014046,0.0052109,2.2204e-016,0.0084062,2.2204e-016,0.012377,2.2204e-016,2.2204e-016,2.2204e-016,0.060566,0.0019166,2.2204e-016,2.2204e-016,2.2204e-016,2.2204e-016,0.0033125,0.019823,2.2204e-016,2.2204e-016,2.2204e-016,2.2204e-016,0.020036,2.2204e-016,0.0076816,2.2204e-016,2.2204e-016,2.2204e-016,2.2204e-016,0.0036326,2.2204e-016,0.0061664,0.0026993,2.2204e-016,0.0018327,0.0048524,0.00132,2.2204e-016,2.2204e-016,0.0084597,0.0084116,0.0065861,0.0029232,2.2204e-016,2.2204e-016,2.2204e-016,2.2204e-016,0.071509,2.2204e-016,2.2204e-016,0.045431,2.2204e-016,0.063582,0.03452,0.032955,0.024354,2.2204e-016,0.01976,0.026034,2.2204e-016,0.024877,2.2204e-016,2.2204e-016,0.0067833,2.2204e-016,0.0012861,0.0017061,0.0032986,2.2204e-016,0.0057374,2.2204e-016,2.2204e-016,2.2204e-016,0.0037604,2.2204e-016,2.2204e-016,2.2204e-016,0.00075347,2.2204e-016,0.0029014,2.2204e-016,2.2204e-016,2.2204e-016,0.058884,0.0035083,2.2204e-016,0.043852,0.01929,2.2204e-016,0.016579,0.0033809,0.018444,2.2204e-016,0.013608,2.2204e-016,0.0061394,0.016384,0.0020986,2.2204e-016,0.01248,0.029553,0.0060137,0.0037968,0.012551,2.2204e-016,0.010287,0.0030562,2.2204e-016,0.0019878,0.0039754,2.2204e-016,0.0023504,2.2204e-016,0.001335,2.2204e-016,0.00209,0.0050911,0.0056302,0.00089458,2.2204e-016,2.2204e-016,2.2204e-016,2.2204e-016,0.095551,0.13159,0.02273,0.012892,2.2204e-016,2.2204e-016,2.2204e-016,0.004119,2.2204e-016,0.017519,2.2204e-016,2.2204e-016,2.2204e-016,0.009904,0.038845,0.017344,0.0042845,2.2204e-016,0.00032897,2.2204e-016,0.0018784,2.2204e-016,0.0011143,2.2204e-016,0.00069502,0.0021074,2.2204e-016,2.2204e-016,2.2204e-016,0.006005,2.2204e-016,0.0037412,2.2204e-016,0.006262,0.00025832,0.052258,2.2204e-016,0.012158,2.2204e-016,0.07409,2.2204e-016,2.2204e-016,2.2204e-016,2.2204e-016,2.2204e-016,2.2204e-016,7.3566e-007,2.2204e-016,2.2204e-016,0.0045046,0.0047851,0.0052197,2.2204e-016,2.2204e-016,0.002086,2.2204e-016,0.005775,0.0061261,2.2204e-016,2.2204e-016,0.0019593,0.0068597,0.00011498,0.0024915,0.00045786,2.2204e-016

016,0.0055221,2.2204e-016,0.00016048,2.2204e-  
016,0.0015437,0.0053077,2.2204e-016,2.2204e-016,0.1108,2.2204e-  
016,2.2204e-016,2.2204e-016,2.2204e-016,0.024914,2.2204e-  
016,0.036426,0.0028406,2.2204e-  
016,0.008621,0.012733,0.013187,0.01585,0.0030142,0.0072482,2.2204e-  
016,0.016262,0.00062595,0.00042572,0.0063674,0.0045742,2.2204e-  
016,0.00036534,2.2204e-016,0.0015788,2.2204e-016,0.0026818,2.2204e-  
016,2.2204e-016,0.00028971,0.0051449,0.0021321,0.00089462,2.2204e-  
016,2.2204e-016,2.2204e-016,0.045023,2.2204e-016,0.030609,2.2204e-  
016,2.2204e-016,0.019425,0.0027982,2.2204e-  
016,0.01591,0.052726,2.2204e-016,0.012595,2.2204e-016,2.2204e-  
016,2.2204e-016,2.2204e-016,2.2204e-016,0.012194,2.2204e-016,2.2204e-  
016,0.0016567,0.0037034,0.0043153,0.010311,0.0093822,0.0023563,0.00086  
278,2.2204e-016,8.8602e-005,0.0035128,0.0043452,2.2204e-  
016,0.00039285,2.2204e-016,2.2204e-016,2.2204e-016,2.2204e-  
016,2.2204e-016,0.022804,0.011667,0.05656,2.2204e-016,2.2204e-  
016,0.013378,0.035265,2.2204e-016,2.2204e-  
016,0.028246,0.0071908,2.2204e-016,2.2204e-  
016,0.0056872,0.0034131,0.0025217,2.2204e-016,2.2204e-016,2.2204e-  
016,2.2204e-016,0.0073404,0.0074789,2.2204e-016,2.2204e-016,2.2204e-  
016,0.0034795,0.0056403,0.006748,0.0045233,2.2204e-016,2.2204e-  
016,0.0042223,0.0026395,0.00066244,0.0047602,2.2204e-016,2.2204e-  
016,0.026441,2.2204e-016,2.2204e-016,2.2204e-016,2.2204e-016,2.2204e-  
016,0.029059,2.2204e-016,2.2204e-016,0.019841,2.2204e-  
016,0.018536,0.00024926,0.012784,2.2204e-  
016,0.010579,0.021116,0.012288,0.0033673,0.0024488,0.0034458,0.0049915  
,2.2204e-016,0.0041352,0.0012489,2.2204e-016,2.2204e-  
016,0.0015066,2.2204e-016,0.0087836,2.2204e-016,2.2204e-016,2.2204e-  
016,2.2204e-016,0.0027465,2.2204e-016,2.2204e-016,2.2204e-  
016,0.055661,0.016301,0.066617,0.031706,0.010388,0.02471,2.2204e-  
016,2.2204e-016,2.2204e-016,0.010188,2.2204e-016,0.021875,2.2204e-  
016,2.2204e-016,2.2204e-016,0.009693,2.2204e-016,2.2204e-016,2.2204e-  
016,0.0047602,0.0048704,2.2204e-  
016,0.0033747,0.0013218,0.00071772,2.2204e-  
016,0.0036148,0.0061308,2.2204e-  
016,0.001213,0.001454,0.0040663,2.2204e-016,2.2204e-016,2.2204e-  
016,0.0019466,2.2204e-016,2.2204e-  
016,0.0063853,0.023207,0.011697,0.0051191,0.040445,0.015967,0.023789,0  
.014906,2.2204e-016,0.011359,2.2204e-  
016,0.0055037,0.016295,0.0098338,0.022192,2.2204e-016,2.2204e-  
016,0.02555,0.0053505,2.2204e-016,2.2204e-016,2.2204e-  
016,0.0039296,2.2204e-016,0.00090423,2.2204e-016,2.2204e-  
016,0.0061209,2.2204e-016,0.0021083,2.2204e-016,2.2204e-016,2.2204e-  
016,2.2204e-016,0.0053123,2.2204e-016,0.032248,2.2204e-  
016,0.012702,0.0029873,2.2204e-  
016,0.024161,0.016256,0.0050789,0.015243,2.2204e-016,0.011949,2.2204e-  
016,0.020289,2.2204e-016,2.2204e-  
016,0.0062372,0.04562,0.018161,0.0018783,2.2204e-016,2.2204e-  
016,2.2204e-016,0.013113,0.0045346,0.0031808,2.2204e-  
016,0.00026989,0.005273,0.0029846,2.2204e-  
016,0.0011411,0.0025102,0.0073037,2.2204e-016,2.2204e-  
016,0.0015273,1.2335e-005,0.037897,0.017268,2.2204e-016,2.2204e-

016,0.017859,2.2204e-016,2.2204e-016,2.2204e-016,2.2204e-016,2.2204e-  
016,2.2204e-016,2.2204e-016,0.0021682,2.2204e-016,0.0055221,2.2204e-  
016,0.022249,2.2204e-016,0.003506,2.2204e-016,2.2204e-016,2.2204e-  
016,2.2204e-016,2.2204e-016,0.0013697,2.2204e-016,2.2204e-  
016,0.0018585,2.2204e-016,0.0066269,0.004972,0.0022195,2.2204e-  
016,0.0063554,0.0015381,0.0023918,0.003321,2.2204e-  
016,0.0037145,0.0020038,0.043465,2.2204e-016,2.2204e-  
016,0.048487,2.2204e-016,0.041281,2.2204e-016,2.2204e-  
016,0.0023264,2.2204e-016,2.2204e-016,2.2204e-016,2.2204e-  
016,0.0045818,2.2204e-016,2.2204e-016,2.2204e-016,2.2204e-  
016,0.0032957,2.2204e-016,0.00048378,2.2204e-016,0.0039872,2.2204e-  
016,2.2204e-016,2.2204e-016,0.010053,2.2204e-  
016,0.0014818,0.0052915,0.0029725,2.2204e-016,2.2204e-016,2.2204e-  
016,0.00093454,0.0028957,2.2204e-016,0.016863,0.0048088,2.2204e-  
016,2.2204e-016,0.014027,0.060571,2.2204e-016,0.021571,2.2204e-  
016,2.2204e-016,2.2204e-016,2.2204e-016,2.2204e-016,2.2204e-  
016,2.2204e-016,0.0023587,2.2204e-016,0.0077406,0.00093288,2.2204e-  
016,0.0037663,0.00091983,2.2204e-016,2.2204e-016,2.2204e-  
016,0.0075444,2.2204e-016,0.0010214,2.2204e-  
016,0.00048939,0.0003996,0.0031519,0.0070164,0.0024688,0.0046621,0.000  
10253,0.019989,2.2204e-016,0.048186,2.2204e-016,2.2204e-  
016,0.0053586,2.2204e-016,0.011547,2.2204e-016,2.2204e-  
016,0.005725,2.2204e-016,2.2204e-  
016,0.0064463,0.00046218,0.0067936,0.0059684,2.2204e-  
016,0.0007985,2.2204e-016,0.005262,2.2204e-016,2.2204e-  
016,0.00088655,2.2204e-016,0.00064473,2.2204e-016,0.011545,2.2204e-  
016,2.2204e-016,0.0033336,2.2204e-016,0.0017747,2.2204e-016,2.2204e-  
016,2.2204e-016,0.00037547,2.2204e-016,2.2204e-016,0.0089738,2.2204e-  
016,0.017534,2.2204e-  
016,0.00056827,0.00162,0.0017137,0.00087294,2.2204e-  
016,0.0058472,0.0014242,2.2204e-016,2.2204e-016,2.2204e-  
016,0.0024834,2.2204e-016,0.0042757,2.2204e-  
016,0.0027145,0.0062118,0.00926,0.0020558,2.2204e-  
016,0.008465,2.2204e-016,0.01114,0.0072247,2.2204e-  
016,0.0014993,0.0037333,2.2204e-016,0.0010556,0.0068433,2.2204e-  
016,2.2204e-016,0.0031326,0.05097,5.511e-005,2.2204e-016,2.2204e-  
016,0.0037727,2.2204e-016,2.2204e-016,0.0051536,2.2204e-  
016,0.001861,2.2204e-016,2.2204e-016,2.2204e-016,2.2204e-  
016,0.0078458,0.00086781,2.2204e-016,0.0022805,2.2204e-  
016,0.0068829,2.2204e-016,0.0023867,2.2204e-016,0.00055427,2.2204e-  
016,0.0027288,0.0069271,0.0069163,0.00097238,2.2204e-  
016,0.0033544,2.2204e-016,2.2204e-016,0.0031575,2.2204e-  
016,0.0010984,2.2204e-016,2.2204e-016,2.2204e-  
016,0.0038821,0.0021704,2.2204e-016,0.0016219,2.6736e-005,2.2204e-  
016,2.2204e-016,2.2204e-  
016,0.0041336,0.0031284,0.0049387,0.00779,2.2204e-  
016,0.0046724,0.0027041,0.0041657,0.010348,2.2204e-  
016,0.0014994,0.0030985,2.2204e-  
016,0.0031174,0.0028558,0.0016244,2.2204e-  
016,0.0011758,0.0047518,2.2204e-016,2.2204e-016,2.2204e-  
016,0.00131,2.2204e-016,2.2204e-016,2.2204e-016,2.2204e-  
016,0.0025618,0.0028984,0.0027614,0.0034749,0.00065652,0.0022891,2.220

4e-016,2.2204e-016,0.0038401,0.0026812,0.0017001,2.2204e-016,2.2204e-016,2.2204e-016,2.2204e-016,0.0039502,0.0021564,2.2204e-016,2.2204e-016,2.2204e-016,2.2204e-016,0.0011876,0.0016371,2.2204e-016,2.2204e-016,2.2204e-016,0.010395,0.0022901,0.0044436,2.2204e-016,2.2204e-016,0.003034,2.2204e-016,0.0001718,0.0012868,0.0016704,2.2204e-016,2.2204e-016,2.2204e-016,0.0035178,0.0020966,2.2204e-016,2.2204e-016,0.001255,2.2204e-016,2.2204e-016,2.2204e-016,0.0031702,0.0031805,6.8479e-005,0.0011149,0.0031513,2.2204e-016,0.00058146,2.2204e-016,2.2204e-016,0.0020596,0.0019949,2.2204e-016,0.0037129,2.2204e-016,2.2204e-016,0.0024529,0.0047649,0.00033075,0.00099198,0.0020126,2.2204e-016,0.0028149,0.0055516,0.0011149,2.2204e-016,0.0037274,0.0019124,0.0030325,2.2204e-016,2.2204e-016,2.2204e-016,0.00013288,0.00054822,2.2204e-016,2.2204e-016,0.0042001,2.2204e-016,2.2204e-016,2.2204e-016,2.2204e-016,2.2204e-016,0.0041967,0.0021805,2.2204e-016,2.2204e-016,0.002498,0.0045371,2.2204e-016,0.0017278,2.2204e-016,2.2204e-016,0.0020913,0.0028802,0.0047027,0.0015042,2.2204e-016,0.0006151,2.2204e-016,2.2204e-016,2.2204e-016,0.0095487,2.2204e-016,2.2204e-016,2.2204e-016,2.2204e-016,2.2204e-016,2.2204e-016,0.0044925,0.0027589,2.2204e-016,2.2204e-016,0.0061967,0.0021884,0.0031822,0.00087666,0.0081129,2.2204e-016,2.2204e-016,2.2204e-016,0.0034451,0.0011569,0.0059076,2.2204e-016,2.2204e-016,0.0079858,2.2204e-016,2.2204e-016,2.2204e-016,2.2204e-016,0.0097059,2.2204e-016,0.0018163,2.2204e-016,0.0044964,2.2204e-016,2.2204e-016,0.0038598,0.0037216,2.2204e-016,2.2204e-016,2.2204e-016,2.2204e-016,2.2204e-016,0.0086144,2.2204e-016,0.0055393,2.2204e-016,2.2204e-016,0.0026241,2.2204e-016,0.0039483,0.0030288,2.2204e-016,0.002681,0.009755,2.2204e-016,0.0018983,0.0076755,9.0164e-005,2.2204e-016,0.0016828,2.2204e-016,2.2204e-016,0.00075103,4.0476e-005,2.2204e-016,2.2204e-016,2.2204e-016,0.0031434,0.0059064,2.2204e-016,2.2204e-016,0.0038917,2.2204e-016,2.2204e-016,2.2204e-016,2.2204e-016,0.00072383,2.2204e-016,0.0058786,0.0013127,2.2204e-016,2.2204e-016,2.2204e-016,0.0052973,2.2204e-016,2.2204e-016,0.0048091,2.2204e-016,2.2204e-016,2.2204e-016,0.0046254,2.2204e-016,2.2204e-016,2.2204e-016,0.0060034,2.2204e-016,2.2204e-016,0.0053713,0.0037723,0.0013226,2.2204e-016,0.0004972,0.0032645,0.0020576,0.0044915,0.0055613,2.2204e-016,0.00042246,2.2204e-016,2.2204e-016,0.00071051,2.2204e-016,2.2204e-016,2.2204e-016,2.2204e-016,2.2204e-016,0.0078258,2.2204e-016,0.001683,0.00056837,0.0017884,2.2204e-016,0.0046844,2.2204e-016,0.0024135,0.003376,0.00079617,2.2204e-016,2.2204e-016,0.00080239,2.2204e-016,0.0016664,2.2204e-016,0.0016042,2.2204e-016,0.0012544,0.0051365,0.0057025,0.0025973,2.2204e-016,0.0012579,2.2204e-016,2.2204e-016,0.0015793,2.2204e-016,2.2204e-016,2.2204e-016,0.0052698,0.0010924,0.00042686,2.2204e-016,2.2204e-016,2.2204e-016,0.00063559,2.2204e-016,2.2204e-016,2.2204e-016,2.2204e-016,2.2204e-016,0.001058,2.2204e-016,0.14108,0.14684,0.13495,0.1302,0.1496,0.1491,0.13919,0.13917,0.14184,0.14504,0.13138,0.15132,0.14183,0.14377,0.14341,0.14783,0.15212,0.14739,0.13739,0.13272,1.2279,1.4454,1.4928,1.1166,0.14088,0.14193,0.14077,0



.15259,0.14204,0.14648,0.13894,0.13853,0.1417,0.15366,0.14178,0.13928,  
0.14662,0.14553,0.14332,2.3649,1.3705,1.2701,1.2484,1.2111,1.3051,1.43  
09,0.14253,0.15719,0.1403,0.13862,0.13629,0.13245,0.13881,0.13887,0.13  
938,0.14589,0.14894,0.14868,0.14686,0.14889,0.14467,2.3458,2.3684,1.33  
97,1.2786,1.34,1.5994,1.3215,1.5388,1.445,1.3969,0.13851,0.14403,0.140  
69,0.143,0.14934,0.1421,0.15508,0.14387,0.14753,0.12944,0.14722,0.1414  
5,0.12992,0.14922,0.14448,2.364,2.4805,2.3574,1.2096,1.306,1.3122,1.26  
94,1.2848,1.0959,1.4075,1.2648,1.2707,0.13845,0.149,0.15111,0.13863,0.  
13747,0.14463,0.13798,0.1388,0.14676,0.14394,0.14428,0.1407,0.14428,0.  
14127,0.14279,0.13628,2.3343,2.4317,2.2793,2.3778,1.2546,1.2743,1.1688  
,1.3335,1.2949,1.2092,1.3751,1.3977,1.1617,1.158,0.14183,0.13507,0.142  
17,0.14843,0.14232,0.13757,0.14385,0.14504,0.13083,0.1303,0.15121,0.14  
598,0.137,0.14582,0.13893,0.14355,2.4095,2.3554,2.4884,2.3058,2.4231,2.  
.343,1.1713,1.3472,1.3323,1.3355,1.266,1.319,1.2958,1.4367,1.2913,1.21  
,0.148,0.14567,0.14174,0.14323,0.14366,0.15051,0.15057,0.14033,0.14436  
,0.14553,0.15823,0.1465,0.12982,0.14101,0.15391,0.14163,0.13776,2.3031  
,2.3354,2.3621,2.4265,2.4146,2.2489,1.4061,1.2759,1.1803,1.2923,1.4407  
,0.91988,1.081,1.3662,1.2353,1.3104,1.0767,0.13829,0.13621,0.13655,0.1  
4337,0.14672,0.14473,0.13805,0.14346,0.14007,0.13886,0.15369,0.15097,0.  
.14563,0.13365,0.1311,0.1337,0.14655,2.2766,2.3333,2.2982,2.3845,2.347  
1,2.5819,2.3669,1.2626,1.2475,1.2275,1.1128,1.2179,1.2796,1.3786,1.278  
5,1.1234,0.94989,1.1512,0.14704,0.14683,0.1403,0.14047,0.14531,0.1422,  
0.14444,0.14349,0.14781,0.14193,0.1444,0.13724,0.12901,0.12639,0.12878  
,0.12686,0.12724,0.1432,2.382,2.2987,2.4185,2.3158,2.4352,2.3724,2.414  
9,1.2712,0.94201,1.2447,1.5042,1.2732,1.1851,1.3853,1.2378,1.4771,1.19  
05,1.5531,0.14188,0.14597,0.14753,0.14522,0.14327,0.14671,0.14079,0.13  
745,0.14443,0.13825,0.13549,0.13558,0.12975,0.12846,0.14976,0.13615,0.  
12756,0.1366,0.13958,2.4148,2.3547,2.3676,2.2654,2.4807,2.3707,2.3128,  
1.5224,0.96824,1.3062,1.2775,0.92821,1.2571,1.1111,1.2215,0.99181,1.23  
4,1.0952,1.2396,0.1415,0.14013,0.14577,0.1331,0.14815,0.145,0.1332,0.1  
3416,0.13778,0.13119,0.12987,0.13405,0.14123,0.13814,0.14008,0.134,0.1  
1745,0.12697,2.3095,2.2512,2.3312,2.4591,2.3622,2.3682,2.3801,1.153,1.  
3171,1.3021,1.2352,1.7746,1.2773,1.2212,1.1599,1.225,1.2927,1.2155,1.1  
927,0.15254,0.14074,0.14372,0.12985,0.13231,0.12651,0.14121,0.12664,0.  
13207,0.12713,0.13465,0.12474,0.125,0.12235,0.13465,0.13121,0.13533,0.  
12807,2.2881,2.3393,2.4803,2.4189,2.3329,2.4225,2.356,2.3012,2.4029,1.  
2439,1.3163,1.1585,1.2576,1.4597,1.2611,1.2821,1.2684,1.3092,1.4474,1.  
4341,0.13975,0.13256,0.14793,0.1249,0.13918,0.13498,0.12716,0.13172,0.  
13552,0.12365,0.13399,0.12617,0.13153,0.13313,0.13693,0.13705,0.13571,  
0.13653,2.3863,2.323,2.3086,2.3868,2.4651,2.5134,2.397,2.4089,2.3687,1.  
.1768,1.3915,0.92456,0.69609,0.96083,0.638,0.86109,0.63195,1.042,0.889  
43,0.72705,0.13667,0.1307,0.13358,0.12431,0.12691,0.12654,0.1385,0.124  
68,0.12991,0.13549,0.12882,0.1254,0.13071,0.13643,0.12694,0.13222,0.11  
936,0.13692,2.3933,2.3933,2.3489,2.3747,2.3533,2.4442,2.3345,2.3434,2.  
3032,1.1956,0.89531,0.91507,0.91069,0.81136,0.71476,0.77751,0.88587,1.  
1003,0.78149,0.66039,0.13734,0.1268,0.13678,0.13839,0.13102,0.12607,0.  
13625,0.13655,0.12977,0.13337,0.12833,0.12804,0.1391,0.13092,0.13386,0.  
.12678,0.13655,0.13634,2.3061,2.3549,2.447,2.3655,2.3868,2.3477,2.3551  
,1.0712,1.2113,1.2443,0.986,0.75608,0.9012,0.89812,0.93557,0.90377,1.0  
05,0.91534,0.87382,0.66169,0.13251,0.13016,0.14018,0.13492,0.12797,0.1  
3445,0.13013,0.13283,0.12775,0.13227,0.12901,0.12672,0.13452,0.13002,0.  
.13064,0.13486,0.13197,0.12602,2.3355,2.4144,2.3193,2.4552,2.3125,2.28

28,1.154,1.246,1.2118,1.487,1.2941,0.99051,0.91363,0.75844,0.83285,1.0  
05,0.96308,1.0015,0.94377,0.85792,0.13462,0.12838,0.13059,0.13475,0.13  
945,0.14163,0.1337,0.13545,0.13138,0.12917,0.13166,0.13214,0.12361,0.1  
3195,0.13065,0.12698,0.128,0.12867,2.3696,2.3763,2.423,2.4503,2.3018,1  
.2097,1.0872,1.2921,1.2571,1.1272,1.1589,0.81961,0.8277,0.84044,0.7936  
8,0.94668,0.91028,0.95395,0.92253,1.0246,0.13064,0.1383,0.1353,0.13439  
,0.12185,0.12464,0.13496,0.13486,0.13987,0.13767,0.1256,0.11871,0.1312  
3,0.13013,0.13418,0.13528,0.12635,0.12982,2.4054,2.3449,2.3476,1.271,0  
.90738,1.2082,1.0822,1.1853,1.1998,1.2725,1.4663,0.89148,0.89425,0.682  
31,0.97169,0.8244,0.9296,0.95478,0.8751,0.83007,0.13251,0.13579,0.1276  
1,0.13399,0.13063,0.13104,0.13009,0.13244,0.13002,0.13813,0.13012,0.13  
101,0.12791,0.12738,0.13221,0.12467,0.12737,0.12884,2.4616,1.255,1.350  
9,1.2011,1.5383,1.1563,1.2465,1.2935,1.4691,1.4209,0.91818,0.89019,0.8  
5235,0.88983,0.62876,0.82559,0.93388,0.85356,0.84361,0.13554,0.13531,0  
.12993,0.13441,0.12902,0.12724,0.12596,0.13614,0.13158,0.13162,0.13501  
,0.13467,0.13522,0.12662,0.12936,0.12366,0.13373,0.11285,1.2582,1.3199  
,1.2653,1.2633,1.2325,1.118,1.2594,1.0446,1.2442,1.322,0.88373,0.83189  
,0.92685,0.91163,0.99018,0.72495,0.9223,0.86672,0.87079,0.13671,0.1295  
8,0.12258,0.12521,0.13356,0.12852,0.13196,0.13068,0.12677,0.13342,0.12  
283,0.1328,0.12678,0.13003,0.11787,0.12282,0.13581,0.11723,1.1931,1.14  
17,1.393,1.0878,1.0734,1.2847,1.2899,1.3671,1.3565,1.1507,0.69849,0.83  
969,0.87065,0.83455,0.90665,0.87228,0.99897,0.83467,0.13515,0.12802,0.  
13213,0.13101,0.14202,0.13295,0.12933,0.12439,0.12888,0.13658,0.13454,  
0.13432,0.1321,0.13776,0.14064,0.1347,0.12546,0.13274,0.1206,1.4654,1.  
0452,1.1467,1.2206,1.212,0.76874,1.1862,1.1883,1.0634,1.4742,0.9002,0.  
85809,0.99354,0.83577,0.96974,0.93387,0.81679,0.86025,0.13421,0.13346,  
0.12867,0.12501,0.129,0.12406,0.13076,0.12725,0.12087,0.12996,0.12749,  
0.13738,0.13492,0.13165,0.13012,0.1394,0.12955,0.12212,0.1223,0.11895,  
1.2684,1.2767,1.4249,1.1958,1.3989,1.198,1.1766,1.0243,1.2263,0.84627,  
0.91741,0.85331,0.95549,1.1464,0.90288,0.13183,0.1275,0.13384,0.12888,  
0.13055,0.13137,0.1282,0.12942,0.13104,0.13467,0.12461,0.12698,0.13018  
,0.14342,0.13001,0.12834,0.13467,0.13671,0.12142,0.11418,0.11762,0.120  
49,1.2132,1.1707,1.0702,1.1456,1.2431,1.234,1.2535,1.3094,1.2116,0.972  
74,0.92897,0.91405,0.12593,0.1241,0.13145,0.12549,0.13677,0.13032,0.13  
27,0.13924,0.13287,0.12721,0.13132,0.13674,0.13063,0.1369,0.12702,0.14  
243,0.12982,0.13272,0.12366,0.1293,0.11867,0.123,0.12367,0.12566,0.124  
49,0.11895,1.2757,1.2661,1.5601,1.1838,1.3534,1.2657,1.4741,1.2871,0.1  
3262,0.12381,0.1372,0.12737,0.12277,0.13905,0.13238,0.13751,0.13772,0.  
12752,0.13263,0.1263,0.1406,0.11921,0.13183,0.12972,0.12408,0.13491,0.  
12396,0.14054,0.12855,0.13541,0.13509,0.11185,0.12149,0.12047,0.12013,  
0.12027,0.11749,1.2068,1.2428,0.98601,1.2901,1.15,0.11821,0.11941,0.13  
381,0.13104,0.13507,0.12721,0.1377,0.1368,0.12547,0.12851,0.11879,0.13  
942,0.12842,0.13485,0.12927,0.13229,0.13433,0.1377,0.13572,0.13482,0.1  
366,0.12558,0.14153,0.12696,0.11883,0.12163,0.11832,0.11724,0.12161,0.  
12676,0.11198,0.11849,0.11993,1.2705,1.2376,0.11513,0.11616,0.11989,0.  
11592,0.12689,0.13712,0.13185,0.13388,0.13324,0.12802,0.12931,0.13174,  
0.13927,0.13369,0.12958,0.1319,0.13251,0.13693,0.13145,0.13426,0.12439  
,0.13186,0.12222,0.11927,0.12897,0.12689,0.12006,0.11148,0.12287,0.115  
64,0.12094,0.12275,0.11708,0.11894,0.12094,0.11584,0.11441,0.1246,0.12  
039,0.1167,0.13394,0.13142,0.12679,0.12173,0.12569,0.13422,0.13485,0.1  
3483,0.14094,0.13223,0.13819,0.13046,0.13545,0.14177,0.12972,0.13299,0  
.1192,0.11636,0.12074,0.12089,0.12079,0.12176,0.12236,0.1231,0.11737,0

.11344,0.11662,0.12155,0.11926,0.11614,0.11768,0.11759,0.11999,0.12236  
,0.11939,0.13348,0.12964,0.13669,0.12669,0.12791,0.13313,0.13203,0.131  
33,0.12418,0.12905,0.12416,0.13203,0.13378,0.12344,0.1141,0.11615,0.11  
683,0.11535,0.11949,0.12509,0.11923,0.11742,0.12119,0.1286,0.1183,0.11  
938,0.11631,0.11769,0.1212,0.1151,0.119,0.11973,0.12371,0.10678,0.1295  
6,0.12961,0.13296,0.13042,0.12839,0.13165,0.13796,0.12576,0.12734,0.11  
501,0.12286,0.12127,0.12075,0.12005,0.12414,0.11563,0.12114,0.11934,0.  
11719,0.12126,0.12033,0.11694,0.12199,0.11527,0.12048,0.12032,0.1226,0  
.11878,0.12013,0.11862,0.11555,0.12399,0.12409,0.11996,0.12594,0.13247  
,0.12666,0.13414,0.11649,0.11628,0.11756,0.11782,0.12204,0.1152,0.1114  
8,0.12249,0.11982,0.11429,0.11364,0.11819,0.11514,0.12112,0.12116,0.11  
676,0.11872,0.1235,0.12271,0.11607,0.12002,0.12053,0.11912,0.12385,0.1  
1895,0.12328,0.12025,0.11336,0.12072,0.11994,0.11487,0.11528,0.12538,0  
.12009,0.11882,0.12156,0.11779,0.12013,0.11295,0.12446,0.12299,0.11801  
,0.11502,0.1257,0.1227,0.12275,0.12046,0.12766,0.1183,0.11768,0.11842,  
0.12048,0.12279,0.12427,0.11625,0.11969,0.12834,0.1157,0.11757,0.11438  
,0.12155,0.12656,0.11703,0.12246,0.11941,0.12121,0.11714,0.11471,0.119  
49,0.12307,0.11513,0.11186,0.12049,0.11414,0.11637,0.12838,0.11478,0.1  
2282,0.1136,0.1153,0.12303,0.11471,0.12333,0.11831,0.11789,0.11822,0.1  
2778,0.10917,0.12422,0.12725,0.12066,0.10652,0.12382,0.11007,0.11148,0  
.12014,0.11706,0.11291,0.11345,0.11605,0.12002,0.12723,0.11196,0.11738  
,0.12314,0.11525,0.10954,0.11764,0.12089,0.11908,0.12476,0.11788,0.115  
65,0.11716,0.11624,0.12559,0.11634,0.11692,0.12429,0.11529,0.11562,0.1  
1207,0.12456,0.11622,0.1149,0.11895,0.1235,0.11783,0.1156,0.12488,0.12  
252,0.12084,0.11786,0.12024,0.1209,0.12191,0.12178,0.12529,0.11546,0.1  
2057,0.11344,0.11365,0.11755,0.11623,0.11637,0.11437,0.11582,0.11188,0  
.11831,0.11587,0.1287,0.11549,0.1197,0.1233,0.12037,0.11661,0.12538,0.  
11929,0.12351,0.12176,0.12081,0.11737,0.11802,0.11998,0.11832,0.1202,0  
.11705,0.12391,0.11443,0.12109,0.12322,0.12845,0.12156,0.11705,0.11923  
,0.11116,0.12023,0.1245,0.11744,0.11143,0.11676,0.12886,0.11814,0.1208  
3,0.11467,0.11827,0.11721,0.12011,0.1198,0.11751,0.11402,0.11709,0.117  
49,0.12364,0.12023  
0.20449,0.21414,0.20102,0.19366,0.21154,0.21631,0.20097,0.20367,0.2065  
6,0.20868,0.19668,0.21658,0.20288,0.20585,0.20732,0.21357,0.21641,0.21  
23,0.20352,0.20145,0.86832,1.0138,1.0361,0.80205,0.20142,0.20666,0.207  
53,0.21751,0.20416,0.21191,0.20613,0.20205,0.20512,0.21164,0.20464,0.2  
0104,0.21449,0.21408,0.20613,1.5897,0.95871,0.89934,0.90523,0.88666,0.  
93464,0.9993,0.20558,0.21822,0.20223,0.20204,0.20582,0.19516,0.20498,0  
.20247,0.20345,0.20456,0.21382,0.20945,0.2086,0.21084,0.2067,1.5501,1.  
581,0.9392,0.92366,0.96793,1.1147,0.92013,1.0354,1.0066,0.96102,0.2018  
8,0.20678,0.20182,0.2028,0.21422,0.20461,0.21431,0.20695,0.21175,0.198  
07,0.21,0.20649,0.19256,0.21413,0.21,1.5717,1.6844,1.5637,0.8485,0.942  
26,0.93807,0.90139,0.93512,0.78424,0.98234,0.90406,0.91059,0.20639,0.2  
1059,0.21681,0.20056,0.20463,0.21108,0.19958,0.2069,0.20799,0.20735,0.  
20914,0.20186,0.20828,0.20419,0.20691,0.20251,1.5703,1.6165,1.4555,1.5  
601,0.92659,0.92349,0.84648,0.91348,0.92691,0.88341,0.97383,1.0245,0.8  
392,0.82564,0.20669,0.20052,0.20055,0.21244,0.2063,0.20366,0.20905,0.2  
0509,0.19625,0.19577,0.21382,0.21041,0.19721,0.21231,0.20775,0.20223,1  
.6496,1.5823,1.7643,1.4554,1.6202,1.604,0.83532,0.97939,0.94442,0.9584  
,0.90468,0.92852,0.91405,1.0189,0.93174,0.86532,0.21293,0.21103,0.2058  
5,0.20692,0.2097,0.21313,0.21195,0.20604,0.207,0.21101,0.22091,0.2134,  
0.19526,0.20486,0.21658,0.20178,0.20155,1.5519,1.5366,1.5305,1.6299,1.

636,1.4383,1.0056,0.89922,0.85687,0.93117,1.0272,0.70327,0.77371,0.929  
42,0.88589,0.93313,0.8037,0.20152,0.20168,0.2044,0.20673,0.21143,0.205  
94,0.20306,0.20888,0.20177,0.20291,0.21759,0.21,0.21303,0.17443,0.1768  
1,0.18093,0.2126,1.504,1.5361,1.5143,1.5766,1.5934,1.7493,1.591,0.8676  
9,0.90509,0.85639,0.79259,0.86901,0.90757,0.98143,0.91989,0.8108,0.703  
59,0.82828,0.20777,0.20833,0.20754,0.20972,0.21083,0.2075,0.21095,0.20  
742,0.21399,0.20533,0.20608,0.18553,0.17616,0.16957,0.17503,0.16816,0.  
17011,0.20816,1.6166,1.486,1.6523,1.5681,1.6651,1.627,1.6289,0.89671,0.  
.71393,0.87155,1.0628,0.88568,0.84549,0.97052,0.86384,1.0434,0.8577,1.  
101,0.20651,0.20627,0.21026,0.21068,0.21103,0.21408,0.20522,0.20103,0.  
20958,0.17789,0.18829,0.17844,0.17333,0.17259,0.20262,0.18341,0.17444,  
0.18356,0.20514,1.6236,1.5567,1.5724,1.4731,1.7173,1.5785,1.5214,1.042  
7,0.70816,0.93262,0.89974,0.71228,0.90278,0.79762,0.88011,0.72734,0.87  
22,0.78875,0.88671,0.20623,0.20683,0.21048,0.20202,0.20977,0.20735,0.1  
8557,0.18087,0.18614,0.17463,0.17287,0.17648,0.1849,0.18265,0.18576,0.  
18068,0.15244,0.1707,1.5603,1.4661,1.5515,1.6646,1.5762,1.596,1.622,0.  
803,0.94857,0.92889,0.87953,1.2372,0.90361,0.89209,0.8377,0.87625,0.92  
877,0.86949,0.84899,0.21375,0.20254,0.20808,0.17152,0.17981,0.16877,0.  
18522,0.16832,0.17875,0.16883,0.17636,0.16362,0.17909,0.16091,0.18051,  
0.17915,0.17698,0.17337,1.4999,1.5371,1.6863,1.6274,1.5268,1.6009,1.57  
23,1.5487,1.5606,0.87046,0.93212,0.82564,0.88336,1.0063,0.91459,0.9238  
2,0.90533,0.91501,0.99883,1.0255,0.18221,0.17331,0.18804,0.17161,0.182  
34,0.17905,0.17263,0.17734,0.18448,0.16836,0.17816,0.1756,0.17682,0.17  
801,0.18408,0.18869,0.18211,0.18489,1.5886,1.5485,1.5065,1.5902,1.6251  
,1.7263,1.6385,1.6195,1.5703,0.87486,0.97348,0.6875,0.52489,0.69783,0.  
48993,0.61395,0.48881,0.7522,0.66403,0.55819,0.18348,0.17753,0.18184,0.  
.1681,0.16523,0.17384,0.18874,0.16412,0.17548,0.18198,0.17464,0.17273,  
0.17418,0.17764,0.17128,0.17316,0.15963,0.1882,1.6293,1.5765,1.5742,1.  
6543,1.5677,1.6611,1.5757,1.5703,1.4927,0.83819,0.65861,0.65262,0.6619  
2,0.58937,0.53295,0.59332,0.65197,0.79083,0.59476,0.50993,0.18561,0.17  
122,0.18355,0.18492,0.17502,0.17173,0.17979,0.18053,0.17228,0.17962,0.  
17287,0.16921,0.18595,0.17608,0.18382,0.17007,0.18213,0.17545,1.5292,1.  
.6061,1.6707,1.5821,1.6236,1.554,1.5698,0.76169,0.86129,0.87976,0.7047  
4,0.56272,0.66274,0.64717,0.69366,0.66673,0.73855,0.66813,0.6254,0.515  
08,0.18037,0.17722,0.18405,0.17799,0.17525,0.18193,0.17099,0.18067,0.1  
7122,0.17569,0.17439,0.17629,0.18203,0.17474,0.17809,0.18045,0.17427,0.  
.16907,1.5212,1.5893,1.5243,1.6581,1.5499,1.5045,0.81057,0.8784,0.8574  
3,1.0122,0.90866,0.70665,0.67783,0.56161,0.61551,0.70412,0.69255,0.718  
17,0.71205,0.61543,0.18633,0.17043,0.17009,0.18211,0.18332,0.18821,0.1  
7913,0.18895,0.1789,0.17482,0.17852,0.17822,0.16988,0.17701,0.17478,0.  
17441,0.17179,0.17462,1.535,1.5875,1.6737,1.6133,1.5256,0.8288,0.76327  
,0.9126,0.84183,0.78046,0.81825,0.60658,0.61437,0.6241,0.60323,0.6847,  
0.66795,0.6674,0.6736,0.69907,0.179,0.18421,0.18169,0.18668,0.16862,0.  
16492,0.18081,0.17293,0.1871,0.18109,0.16591,0.16363,0.17052,0.17605,0.  
.18089,0.18068,0.17148,0.17706,1.6525,1.5458,1.5265,0.90482,0.6276,0.8  
3842,0.75544,0.81247,0.82461,0.8931,0.99199,0.64836,0.64976,0.51707,0.  
70539,0.62825,0.68433,0.69692,0.64274,0.60964,0.17367,0.17935,0.1723,0.  
.1799,0.18017,0.17884,0.17215,0.18154,0.17998,0.18231,0.17714,0.17392,  
0.17399,0.17161,0.16959,0.17086,0.17466,0.17012,1.6191,0.8776,0.94554,  
0.85547,1.052,0.81367,0.8504,0.90759,1.0018,0.9929,0.66697,0.66412,0.6  
2616,0.666,0.48138,0.62933,0.66018,0.63394,0.61623,0.17663,0.17941,0.1  
7698,0.18118,0.1752,0.16758,0.17213,0.17987,0.17533,0.1729,0.18196,0.1

7902,0.17626,0.1729,0.17874,0.16978,0.17741,0.13894,0.87178,0.95622,0.88585,0.87368,0.8648,0.80856,0.87481,0.72539,0.84342,0.90281,0.65013,0.62686,0.69574,0.67747,0.69832,0.55852,0.67202,0.65582,0.64727,0.1849,0.17336,0.16507,0.17265,0.17975,0.1769,0.17814,0.18006,0.17473,0.17543,0.16489,0.17669,0.1721,0.18064,0.16347,0.16831,0.17892,0.14508,0.84323,0.80057,0.94543,0.75658,0.7587,0.89455,0.91569,0.94132,0.92702,0.77857,0.53232,0.6288,0.64398,0.6014,0.64459,0.64681,0.73976,0.63546,0.18168,0.16684,0.17561,0.17665,0.18761,0.17944,0.17337,0.17462,0.17591,0.18259,0.17849,0.18648,0.18614,0.18672,0.18538,0.18534,0.1724,0.1746,0.14602,0.98718,0.7507,0.80836,0.8511,0.85018,0.55181,0.82282,0.8259,0.73866,1.0089,0.66433,0.64903,0.71374,0.61483,0.6866,0.67676,0.60669,0.64217,0.17804,0.17929,0.17247,0.16527,0.17339,0.16913,0.17499,0.17639,0.16891,0.17449,0.17352,0.17867,0.18046,0.17466,0.17404,0.18212,0.17201,0.14726,0.14936,0.14628,0.87215,0.91707,0.9923,0.8069,0.94225,0.84658,0.81595,0.75942,0.85702,0.62049,0.67618,0.63089,0.70416,0.79982,0.64966,0.17784,0.17079,0.17658,0.17749,0.17512,0.17375,0.16757,0.17358,0.18304,0.17701,0.16954,0.17198,0.1745,0.19094,0.17428,0.17269,0.18013,0.18584,0.14881,0.14138,0.14393,0.14532,0.86199,0.79762,0.76823,0.79846,0.86997,0.85434,0.86485,0.91594,0.85447,0.71617,0.70176,0.66375,0.17177,0.17063,0.17364,0.17131,0.18457,0.17019,0.17326,0.18497,0.18001,0.16968,0.17318,0.18468,0.17418,0.188,0.1717,0.19259,0.17469,0.18481,0.1658,0.17311,0.14451,0.14874,0.15115,0.15133,0.14873,0.14538,0.93139,0.86462,1.0513,0.79791,0.9548,0.87793,0.98772,0.89155,0.17696,0.16522,0.18545,0.16758,0.16174,0.18104,0.18226,0.18303,0.18155,0.1738,0.18473,0.16375,0.19102,0.16601,0.17996,0.17283,0.17447,0.18151,0.1663,0.18405,0.17437,0.18689,0.17969,0.13703,0.14776,0.14684,0.14724,0.14523,0.14268,0.81298,0.85361,0.69828,0.87727,0.80067,0.14814,0.14844,0.17902,0.17649,0.18408,0.17123,0.18462,0.18529,0.17097,0.16814,0.16402,0.18666,0.17034,0.18276,0.17579,0.17873,0.17321,0.17888,0.18272,0.18242,0.17986,0.16592,0.18466,0.15377,0.14408,0.14597,0.14425,0.14227,0.14475,0.15307,0.13562,0.14707,0.146,0.89837,0.88534,0.1413,0.14538,0.14683,0.14352,0.17412,0.18159,0.17131,0.18055,0.17715,0.17163,0.16782,0.18124,0.18473,0.17978,0.18004,0.17536,0.17625,0.17883,0.17738,0.17758,0.16953,0.17629,0.16235,0.14354,0.15562,0.15362,0.14675,0.1383,0.15174,0.14209,0.14703,0.14802,0.14316,0.14649,0.1447,0.1417,0.14147,0.14902,0.14592,0.14123,0.17859,0.17659,0.17482,0.16795,0.17115,0.17997,0.18056,0.17814,0.1824,0.18235,0.18351,0.17492,0.18401,0.18465,0.1726,0.17854,0.14599,0.14153,0.14665,0.14542,0.14908,0.14514,0.15144,0.15159,0.14251,0.14405,0.14636,0.14744,0.14652,0.14117,0.14317,0.14367,0.14534,0.15049,0.14501,0.18315,0.17379,0.18477,0.17104,0.17358,0.17936,0.17878,0.17529,0.17081,0.16969,0.1711,0.17917,0.17923,0.15072,0.14045,0.14291,0.14217,0.14252,0.14115,0.14678,0.14668,0.145,0.14617,0.15247,0.14153,0.14589,0.14137,0.14459,0.14683,0.14535,0.1442,0.14315,0.1503,0.13235,0.17387,0.18105,0.17644,0.16898,0.17624,0.17455,0.18539,0.16849,0.16711,0.14257,0.15148,0.14758,0.14812,0.14836,0.15067,0.14389,0.14842,0.14675,0.14393,0.14808,0.1478,0.14442,0.14666,0.14409,0.14956,0.14391,0.14527,0.14616,0.14547,0.14461,0.14242,0.15065,0.14852,0.14795,0.17156,0.17855,0.16458,0.18031,0.14463,0.14201,0.146,0.14462,0.14597,0.14181,0.13949,0.14693,0.15034,0.14197,0.1396,0.1456,0.14149,0.14606,0.1462,0.13965,0.14505,0.14991,0.14825,0.14103,0.14805,0.146,0.14482,0.15362,0.14548,0.14974,0.14631,0.13784,0.15012,0.1473,0.14069,0.14212,0.14956,0.14609,0.14524,0.14619,0.14069,0.14565,0.13903,0.14881,0.14902,0.14357,0.14193,0.1

4574,0.14758,0.14819,0.14784,0.15029,0.14627,0.14605,0.14614,0.14298,0.14908,0.15048,0.14471,0.14803,0.15035,0.1422,0.14624,0.1411,0.14543,0.15167,0.14396,0.14851,0.14632,0.14799,0.13854,0.14145,0.14679,0.14712,0.14325,0.13877,0.14593,0.14205,0.14165,0.15704,0.13769,0.14969,0.14076,0.14207,0.14729,0.13996,0.14989,0.14593,0.14444,0.14763,0.1511,0.13584,0.14737,0.15558,0.14434,0.13423,0.14893,0.13714,0.13908,0.14753,0.143,0.13789,0.14117,0.14402,0.14749,0.15221,0.13968,0.14222,0.14777,0.14213,0.13534,0.14247,0.14401,0.14348,0.15068,0.1463,0.14088,0.14438,0.14323,0.15524,0.14117,0.14147,0.15013,0.14164,0.14238,0.13654,0.15119,0.14373,0.1433,0.14311,0.1479,0.14355,0.14123,0.15298,0.14772,0.14574,0.14555,0.14879,0.14498,0.14502,0.14535,0.15056,0.13871,0.14557,0.13912,0.13928,0.14269,0.14245,0.14091,0.13914,0.14075,0.13717,0.14276,0.14068,0.1528,0.14127,0.14464,0.15002,0.14925,0.14301,0.14985,0.14481,0.1492,0.14879,0.14634,0.14169,0.14443,0.14894,0.14472,0.14985,0.14249,0.14792,0.14063,0.14798,0.14659,0.15215,0.15083,0.14752,0.14393,0.14116,0.14694,0.15145,0.1445,0.14132,0.14412,0.15413,0.14509,0.14399,0.13954,0.14108,0.14402,0.14712,0.1469,0.14562,0.14262,0.145,0.1416,0.1465,0.15125

0.22584,0.23443,0.22019,0.21275,0.23513,0.23235,0.22218,0.22407,0.23184,0.22822,0.22183,0.23503,0.22471,0.22762,0.23085,0.23243,0.24049,0.2353,0.22835,0.22146,0.64519,0.74299,0.78719,0.59768,0.22407,0.22638,0.22401,0.23781,0.22343,0.23351,0.22566,0.22619,0.22807,0.23386,0.22443,0.2251,0.23262,0.2339,0.22924,1.1299,0.70588,0.67825,0.67089,0.68073,0.676,0.72581,0.22543,0.24052,0.22335,0.22321,0.22931,0.21408,0.22721,0.22309,0.22273,0.22628,0.2334,0.23161,0.22833,0.22803,0.22705,1.0851,1.1316,0.68488,0.68951,0.72992,0.80713,0.66282,0.73801,0.71287,0.70907,0.22763,0.22555,0.22524,0.22742,0.2343,0.22409,0.23879,0.2294,0.23355,0.21888,0.23122,0.22582,0.2168,0.23956,0.22498,1.0988,1.1878,1.0681,0.61348,0.70077,0.69508,0.68106,0.72045,0.60081,0.69425,0.66127,0.68216,0.22603,0.23596,0.2369,0.22257,0.22574,0.23162,0.22028,0.22836,0.23101,0.22746,0.23382,0.22332,0.23098,0.22851,0.22842,0.22329,1.1084,1.1477,1.0103,1.063,0.71129,0.6841,0.63337,0.68436,0.66924,0.66414,0.70259,0.76361,0.64177,0.61522,0.22808,0.22265,0.2238,0.22724,0.22752,0.22564,0.23737,0.22382,0.21533,0.21522,0.23627,0.22816,0.22322,0.23392,0.22595,0.22194,1.1614,1.0946,1.2395,1.0211,1.1377,1.0787,0.63712,0.72552,0.70094,0.72334,0.66994,0.68539,0.68183,0.74749,0.71061,0.64058,0.23552,0.22929,0.22663,0.22558,0.23157,0.23832,0.23454,0.22398,0.22415,0.23863,0.24298,0.23514,0.21582,0.22641,0.2359,0.22191,0.22531,1.091,1.0578,1.0595,1.1724,1.1246,0.88934,0.75227,0.67247,0.6526,0.70654,0.73797,0.56202,0.59355,0.67836,0.65347,0.68233,0.62431,0.22028,0.22013,0.22963,0.22757,0.23322,0.22908,0.2243,0.22746,0.22568,0.22536,0.23532,0.23624,0.23165,0.17708,0.18227,0.19305,0.23471,1.0695,1.1016,1.0281,1.0897,1.0739,1.2199,1.096,0.62734,0.67379,0.63266,0.59777,0.66088,0.6653,0.69605,0.70236,0.59187,0.54652,0.6144,0.23234,0.23232,0.22706,0.23089,0.23046,0.22697,0.23,0.23134,0.23435,0.22966,0.2308,0.19438,0.18321,0.17801,0.18074,0.17069,0.17688,0.22882,1.1251,1.013,1.1634,1.1018,1.1648,1.1003,1.1474,0.66459,0.56164,0.64721,0.81607,0.64166,0.63461,0.74261,0.65645,0.77703,0.67757,0.81292,0.22797,0.22849,0.23093,0.22896,0.23258,0.23427,0.22681,0.22502,0.23477,0.18741,0.20125,0.18173,0.18176,0.17906,0.21527,0.18805,0.17898,0.18781,0.2297,1.1463,1.0617,1.0769,1.0082,1.252,1.1158,1.034,0.77137,0.55646,0.68488,0.64523,0.54365,0.67273,0.60692,0.65753,0.56519,0.64545,0.60337,0.67369,0.23035,0.2263,0.23106,0.2

2064,0.23192,0.23048,0.19785,0.18763,0.1919,0.17622,0.18227,0.18233,0.19059,0.18922,0.19308,0.18632,0.15143,0.17543,1.0563,0.99758,1.0799,1.1791,1.0875,1.1106,1.1073,0.59066,0.68612,0.70642,0.67106,0.89234,0.66275,0.65687,0.62268,0.66554,0.70243,0.65033,0.65624,0.23698,0.22522,0.23323,0.17332,0.18295,0.17406,0.19669,0.17027,0.18549,0.1726,0.18096,0.16866,0.19266,0.16631,0.18726,0.18487,0.18236,0.18056,1.0476,1.0447,1.1666,1.1347,1.0727,1.0989,1.083,1.0952,1.1128,0.65637,0.68956,0.60153,0.63192,0.7223,0.67936,0.72512,0.67477,0.68468,0.7205,0.74485,0.18527,0.17659,0.19534,0.1815,0.18441,0.1823,0.17905,0.18155,0.19128,0.17061,0.18358,0.18162,0.17881,0.18481,0.18899,0.19748,0.18877,0.19308,1.0976,1.0775,1.0173,1.0782,1.1106,1.2426,1.1285,1.2011,1.0881,0.66827,0.70353,0.53112,0.40655,0.5323,0.38228,0.46525,0.3798,0.56279,0.53072,0.43962,0.19338,0.18666,0.19055,0.17216,0.1674,0.1741,0.1957,0.16818,0.17995,0.19031,0.17645,0.18029,0.17949,0.18481,0.17774,0.17862,0.16635,0.19458,1.1673,1.0989,1.0827,1.1576,1.0956,1.2013,1.0758,1.1004,1.0164,0.61945,0.49831,0.48793,0.49198,0.43598,0.42559,0.45999,0.49898,0.57554,0.4654,0.40812,0.19274,0.17155,0.18625,0.1883,0.18243,0.17706,0.1872,0.18384,0.17467,0.18428,0.18158,0.17738,0.18965,0.18248,0.19294,0.17073,0.1894,0.18306,1.0276,1.1505,1.1408,1.0831,1.161,1.0671,1.0872,0.56551,0.60632,0.63195,0.52278,0.44297,0.50943,0.47868,0.53214,0.5087,0.55175,0.50832,0.46912,0.40983,0.18397,0.1799,0.18977,0.18506,0.18332,0.18691,0.17417,0.18788,0.17874,0.1805,0.17925,0.18688,0.1891,0.17592,0.18164,0.18635,0.18134,0.17397,1.0519,1.1107,1.0474,1.1449,1.0897,1.0575,0.56808,0.62724,0.6033,0.71745,0.66687,0.52637,0.50338,0.4252,0.46243,0.5191,0.49746,0.53451,0.54547,0.45369,0.19663,0.1719,0.16961,0.18467,0.18808,0.19489,0.18368,0.19634,0.18778,0.18537,0.18391,0.18178,0.17776,0.18318,0.17823,0.18074,0.18166,0.17939,1.0403,1.1249,1.1935,1.1045,1.105,0.60288,0.55857,0.66627,0.61259,0.55582,0.58143,0.4577,0.45929,0.48722,0.46456,0.51064,0.509,0.46399,0.51236,0.50242,0.18834,0.19094,0.18388,0.1993,0.17681,0.16907,0.18029,0.17494,0.1946,0.18936,0.17262,0.16968,0.17837,0.18461,0.18852,0.18668,0.17859,0.18,1.1523,1.0328,1.0299,0.65778,0.4424,0.59535,0.56784,0.57094,0.59153,0.63429,0.72245,0.47267,0.49606,0.40042,0.53319,0.49439,0.50794,0.52061,0.50718,0.47279,0.17627,0.18526,0.17655,0.18834,0.18208,0.18867,0.17601,0.19057,0.18991,0.18641,0.18446,0.18083,0.18447,0.17736,0.17151,0.17626,0.17571,0.17718,1.1621,0.65328,0.68368,0.62837,0.73726,0.58076,0.5893,0.65935,0.70892,0.69456,0.50339,0.50629,0.46013,0.52035,0.3787,0.49931,0.48642,0.4729,0.45965,0.18291,0.18476,0.18445,0.18563,0.18121,0.16594,0.17602,0.1832,0.17974,0.17721,0.18659,0.18614,0.18005,0.17916,0.18864,0.1765,0.18577,0.13019,0.63031,0.67548,0.64565,0.63643,0.62684,0.58966,0.62502,0.52716,0.59133,0.66222,0.4932,0.48215,0.53582,0.51623,0.52493,0.43426,0.49252,0.49375,0.4857,0.19196,0.17595,0.17078,0.18078,0.18577,0.1881,0.18267,0.18611,0.18034,0.17981,0.16559,0.18123,0.17716,0.18861,0.16863,0.16803,0.18478,0.13592,0.61662,0.58564,0.65157,0.53856,0.5597,0.62064,0.65973,0.70262,0.65271,0.56618,0.41744,0.48732,0.49237,0.46945,0.47725,0.48922,0.55719,0.48902,0.18607,0.16366,0.18132,0.17958,0.19125,0.18676,0.17719,0.17878,0.18092,0.1887,0.18294,0.19643,0.19181,0.19383,0.18911,0.19726,0.18138,0.17896,0.1348,0.70653,0.56237,0.57953,0.60441,0.60085,0.40175,0.59746,0.58335,0.51869,0.65884,0.49826,0.49752,0.53465,0.45486,0.509,0.4951,0.45736,0.49414,0.18559,0.18628,0.1819,0.16984,0.17564,0.1736,0.18016,0.18001,0.17393,0.18336,0.18274,0.18358,0.18713,0.18144,0.1817,0.18589,0.17407,0.13622,0.13935,0.13596,0.63157,0.6620

6, 0.70664, 0.55944, 0.69131, 0.63948, 0.59411, 0.54977, 0.61362, 0.46828, 0.50851, 0.4749, 0.53273, 0.56965, 0.48781, 0.18462, 0.17693, 0.18405, 0.18274, 0.17679, 0.17746, 0.1753, 0.17869, 0.19138, 0.18355, 0.17794, 0.17772, 0.17996, 0.20033, 0.17924, 0.1805, 0.18468, 0.19501, 0.14134, 0.13074, 0.13522, 0.13531, 0.60664, 0.55875, 0.55886, 0.5903, 0.62863, 0.61541, 0.62911, 0.67619, 0.59716, 0.54979, 0.55596, 0.50972, 0.17812, 0.17576, 0.18107, 0.17462, 0.19175, 0.17416, 0.17603, 0.18859, 0.18552, 0.17471, 0.17812, 0.19157, 0.17905, 0.20076, 0.18033, 0.19999, 0.1796, 0.19123, 0.17139, 0.17566, 0.13235, 0.13733, 0.14285, 0.14071, 0.13752, 0.13744, 0.67424, 0.60733, 0.76976, 0.55448, 0.69398, 0.61978, 0.66883, 0.66084, 0.18285, 0.17276, 0.18828, 0.17334, 0.16724, 0.18297, 0.187, 0.18938, 0.18898, 0.18095, 0.19623, 0.16417, 0.19802, 0.17531, 0.18637, 0.17684, 0.17954, 0.18877, 0.17586, 0.18142, 0.18264, 0.19481, 0.18578, 0.12733, 0.13681, 0.13971, 0.13929, 0.13659, 0.13218, 0.56403, 0.63277, 0.53487, 0.61377, 0.59187, 0.1393, 0.14051, 0.18738, 0.18502, 0.19007, 0.1787, 0.18914, 0.19568, 0.17841, 0.17553, 0.16638, 0.19426, 0.17457, 0.18925, 0.1849, 0.18687, 0.17249, 0.1838, 0.19088, 0.18791, 0.18267, 0.16666, 0.19131, 0.14431, 0.13518, 0.1338, 0.13401, 0.13262, 0.13234, 0.1452, 0.1268, 0.1376, 0.13763, 0.64453, 0.63911, 0.13179, 0.13605, 0.13692, 0.13711, 0.18368, 0.18822, 0.18122, 0.18976, 0.18144, 0.18046, 0.16861, 0.18948, 0.1954, 0.18645, 0.19053, 0.17779, 0.18549, 0.18592, 0.18497, 0.18108, 0.1722, 0.17669, 0.16423, 0.13336, 0.14508, 0.14479, 0.1397, 0.13145, 0.14221, 0.1363, 0.13672, 0.13956, 0.13088, 0.13909, 0.13409, 0.12889, 0.13205, 0.13793, 0.13666, 0.13062, 0.18773, 0.18203, 0.18184, 0.17188, 0.18209, 0.18294, 0.18375, 0.18769, 0.18816, 0.18618, 0.18823, 0.18032, 0.18663, 0.18885, 0.17831, 0.18454, 0.13808, 0.13165, 0.1385, 0.13388, 0.14, 0.13364, 0.1398, 0.14147, 0.1337, 0.13667, 0.13719, 0.13987, 0.13716, 0.12876, 0.13445, 0.13512, 0.1368, 0.14222, 0.13602, 0.19213, 0.17866, 0.19402, 0.18096, 0.17805, 0.18392, 0.18585, 0.17898, 0.17726, 0.17276, 0.18274, 0.1877, 0.18762, 0.14033, 0.13165, 0.13199, 0.13401, 0.13513, 0.13202, 0.14085, 0.13766, 0.13455, 0.136, 0.14122, 0.13433, 0.136, 0.13328, 0.13677, 0.13684, 0.1347, 0.13528, 0.13584, 0.14032, 0.12393, 0.18319, 0.19293, 0.18076, 0.17015, 0.17949, 0.18555, 0.19051, 0.17229, 0.17138, 0.13403, 0.14259, 0.13906, 0.13767, 0.13605, 0.1432, 0.13495, 0.14125, 0.13412, 0.13409, 0.14095, 0.13819, 0.13942, 0.1388, 0.13534, 0.13676, 0.13301, 0.13421, 0.13549, 0.13313, 0.13588, 0.13318, 0.14201, 0.13864, 0.13634, 0.17717, 0.18578, 0.16821, 0.19132, 0.13571, 0.12842, 0.13592, 0.1346, 0.13907, 0.1311, 0.13261, 0.13739, 0.14097, 0.13027, 0.13192, 0.13603, 0.13543, 0.13367, 0.13553, 0.13081, 0.13689, 0.13798, 0.13987, 0.13202, 0.13509, 0.14125, 0.13776, 0.14255, 0.13457, 0.13788, 0.13711, 0.12635, 0.14029, 0.13326, 0.13225, 0.13369, 0.13776, 0.13394, 0.13472, 0.13779, 0.1311, 0.13679, 0.12988, 0.13862, 0.1361, 0.13531, 0.13244, 0.13463, 0.13818, 0.13989, 0.14287, 0.14284, 0.1369, 0.13565, 0.13428, 0.1331, 0.13897, 0.14089, 0.13409, 0.14042, 0.13992, 0.13391, 0.14058, 0.13071, 0.13513, 0.14316, 0.13347, 0.13881, 0.13377, 0.13696, 0.13058, 0.1325, 0.13742, 0.13871, 0.1335, 0.1303, 0.13386, 0.13485, 0.13578, 0.1438, 0.13114, 0.13927, 0.13329, 0.13142, 0.13598, 0.13094, 0.1407, 0.13843, 0.13564, 0.13481, 0.14011, 0.12823, 0.13764, 0.14758, 0.13523, 0.12555, 0.13861, 0.12907, 0.13216, 0.13824, 0.13279, 0.13038, 0.13246, 0.13475, 0.13649, 0.14243, 0.13104, 0.13092, 0.14057, 0.13531, 0.1248, 0.13338, 0.13578, 0.13425, 0.14181, 0.13595, 0.13003, 0.13517, 0.13314, 0.14368, 0.13107, 0.13101, 0.13983, 0.13416, 0.13403, 0.12782, 0.14062, 0.1337, 0.13402, 0.13335, 0.13906, 0.13366, 0.13412, 0.14425, 0.13706, 0.13583, 0.13438, 0.14026, 0.13551, 0.13449, 0.13672, 0.13965, 0.13088, 0.13766, 0.13064, 0.1292, 0.1337, 0.1314, 0.13321, 0.12781, 0.13267, 0.13021, 0.1346, 0.13009, 0.14289, 0.13133, 0.13344, 0.13803, 0.14233, 0.13535, 0.14167, 0.13711, 0.13716, 0.13658, 0.13588, 0.13277, 0.13287, 0.14101, 0



.13666,0.1404,0.13519,0.13921,0.13356,0.13817,0.13458,0.14239,0.14255,  
0.13694,0.13228,0.13384,0.13735,0.1421,0.13782,0.13441,0.135,0.14284,0  
.13669,0.13354,0.13329,0.13256,0.13535,0.13647,0.13789,0.13891,0.13458  
,0.13467,0.13363,0.13648,0.14064  
0.21961,0.2295,0.21972,0.21552,0.23649,0.23121,0.22496,0.22116,0.22656  
,0.22453,0.22495,0.23627,0.22482,0.22835,0.23157,0.23623,0.24133,0.232  
29,0.2254,0.21865,0.51906,0.55275,0.5884,0.46733,0.2229,0.226,0.22312,  
0.23336,0.22123,0.23056,0.22124,0.2233,0.22931,0.23818,0.22267,0.2269,  
0.23393,0.23219,0.22613,0.84291,0.56068,0.53637,0.53321,0.55157,0.5024  
,0.55831,0.22167,0.23896,0.22267,0.22156,0.22962,0.21149,0.22393,0.222  
36,0.22622,0.2228,0.23529,0.23645,0.22631,0.22587,0.22728,0.78841,0.86  
585,0.52906,0.54781,0.5827,0.59662,0.50863,0.55813,0.57654,0.52929,0.2  
3126,0.22932,0.22577,0.22779,0.23578,0.22518,0.23438,0.2257,0.23702,0.  
22117,0.23144,0.22808,0.21702,0.23759,0.22446,0.81086,0.88341,0.80619,  
0.47451,0.54822,0.53888,0.54248,0.57468,0.48229,0.5444,0.50817,0.54758  
,0.227,0.23507,0.23401,0.22438,0.22646,0.23302,0.22092,0.22975,0.22737  
,0.22572,0.23177,0.22845,0.22574,0.2285,0.22793,0.22854,0.81774,0.8069  
6,0.7309,0.71355,0.55631,0.5251,0.49704,0.54017,0.5157,0.50963,0.52379  
,0.61516,0.5156,0.49582,0.22462,0.22157,0.22632,0.22842,0.2279,0.22396  
,0.23315,0.22129,0.21795,0.21368,0.23695,0.22787,0.22201,0.22913,0.224  
08,0.22143,0.8673,0.80987,0.96522,0.70091,0.86648,0.75097,0.51333,0.56  
256,0.56992,0.57938,0.51292,0.5502,0.56167,0.5947,0.56505,0.48319,0.23  
292,0.22819,0.22514,0.2303,0.22951,0.24189,0.23074,0.22211,0.22272,0.2  
3455,0.24063,0.23543,0.21751,0.2267,0.23497,0.21977,0.22029,0.79229,0.  
8024,0.79996,0.87139,0.84351,0.63512,0.5645,0.54045,0.50333,0.53951,0.  
58184,0.45814,0.46606,0.50989,0.5084,0.53277,0.49482,0.22567,0.22153,0.  
.22938,0.22725,0.23317,0.22733,0.22285,0.22335,0.22549,0.22506,0.23295  
,0.23322,0.2302,0.16889,0.16918,0.18631,0.23279,0.81592,0.80773,0.7654  
5,0.79899,0.80885,0.87208,0.77729,0.47527,0.54756,0.4898,0.47681,0.510  
13,0.50288,0.54567,0.54636,0.46455,0.44199,0.48613,0.2259,0.23294,0.22  
331,0.22663,0.22737,0.22577,0.23127,0.2306,0.23061,0.22689,0.2322,0.18  
335,0.17053,0.16841,0.17027,0.16083,0.16839,0.22745,0.83217,0.70639,0.  
84189,0.83832,0.85193,0.81337,0.83709,0.51873,0.45588,0.48655,0.66222,  
0.48358,0.50175,0.56549,0.51469,0.58008,0.53274,0.60977,0.22836,0.228,  
0.23089,0.22628,0.22987,0.23352,0.22321,0.22308,0.23415,0.17504,0.1910  
7,0.172,0.17429,0.16992,0.20488,0.17772,0.16942,0.17712,0.2284,0.86073  
,0.77001,0.76869,0.72182,0.97009,0.86772,0.77818,0.5738,0.46026,0.5400  
5,0.48485,0.44647,0.52367,0.46669,0.5296,0.46415,0.48604,0.47788,0.536  
65,0.2295,0.22585,0.22782,0.22044,0.23281,0.22779,0.19555,0.17749,0.18  
229,0.16897,0.16954,0.17546,0.18049,0.17728,0.18513,0.1754,0.13992,0.1  
653,0.747,0.71424,0.79492,0.89421,0.82494,0.81049,0.8194,0.46125,0.529  
06,0.57673,0.52112,0.69236,0.51529,0.52397,0.48082,0.52975,0.54427,0.5  
0988,0.50925,0.23441,0.22689,0.23324,0.15823,0.16752,0.16046,0.18627,0.  
.16134,0.1732,0.15608,0.17011,0.15858,0.184,0.15444,0.17441,0.17265,0.  
16941,0.16686,0.78883,0.78775,0.87759,0.81911,0.83128,0.81423,0.79948,  
0.79313,0.83816,0.5204,0.53258,0.47717,0.49031,0.55869,0.55571,0.57338  
,0.49949,0.53645,0.54224,0.59798,0.17403,0.1697,0.18363,0.16943,0.1753  
4,0.17011,0.17063,0.17134,0.18228,0.16325,0.17062,0.17643,0.16782,0.17  
306,0.18294,0.18916,0.17722,0.17854,0.79576,0.77121,0.74068,0.77528,0.  
81623,0.90328,0.78283,0.94225,0.81176,0.52813,0.53387,0.40758,0.31575,  
0.41012,0.29893,0.37174,0.30976,0.44986,0.42294,0.35263,0.18275,0.1738  
9,0.1791,0.16368,0.15417,0.16437,0.18942,0.15557,0.1706,0.1791,0.16171

,0.1711,0.16841,0.17583,0.17057,0.16994,0.15246,0.17974,0.83209,0.79628,0.79901,0.86654,0.76201,0.90024,0.81727,0.82311,0.72378,0.45579,0.37306,0.37756,0.39107,0.35237,0.34282,0.36871,0.39723,0.43314,0.38881,0.33563,0.18417,0.16169,0.17437,0.1733,0.17481,0.16768,0.17833,0.17194,0.16187,0.17475,0.17193,0.16632,0.17929,0.17414,0.18213,0.16113,0.17971,0.17236,0.7751,0.86954,0.83871,0.80063,0.88067,0.77056,0.77231,0.41822,0.4392,0.44421,0.41347,0.34672,0.3963,0.37944,0.42599,0.41123,0.42244,0.4165,0.36695,0.344,0.17521,0.16875,0.17729,0.17794,0.17475,0.17936,0.16316,0.1775,0.17019,0.17028,0.1719,0.17372,0.17681,0.1615,0.17059,0.17496,0.16856,0.16753,0.78862,0.82273,0.80317,0.81979,0.84562,0.76073,0.4506,0.48343,0.4457,0.51834,0.51154,0.40867,0.39952,0.32512,0.34503,0.41677,0.38904,0.42573,0.44456,0.35463,0.18736,0.15924,0.15537,0.17249,0.18001,0.18094,0.17638,0.18922,0.1748,0.17543,0.17404,0.17267,0.1682,0.17401,0.17077,0.1741,0.17321,0.16649,0.75007,0.89231,0.8939,0.82769,0.76793,0.45159,0.42237,0.49886,0.45306,0.41836,0.45862,0.38179,0.36322,0.38305,0.369,0.38014,0.41798,0.35675,0.40254,0.37252,0.17656,0.18089,0.17483,0.1927,0.16363,0.15422,0.1695,0.15991,0.18648,0.18156,0.1626,0.15907,0.16574,0.17752,0.17994,0.17776,0.17042,0.17089,0.8416,0.75904,0.73424,0.49163,0.35316,0.42946,0.43551,0.41901,0.46075,0.47293,0.52511,0.36228,0.39423,0.33071,0.41066,0.38933,0.38326,0.39714,0.40366,0.35834,0.1636,0.17819,0.16516,0.17562,0.17503,0.17852,0.16485,0.18107,0.1822,0.17021,0.17339,0.17039,0.17832,0.16486,0.15743,0.16599,0.16663,0.16364,0.82276,0.4807,0.52509,0.48586,0.55251,0.42497,0.43214,0.48887,0.54151,0.51611,0.3986,0.38354,0.34195,0.39308,0.31682,0.40077,0.35074,0.35696,0.3554,0.17196,0.1736,0.17548,0.17558,0.16753,0.156,0.16243,0.17486,0.16728,0.16878,0.17982,0.17964,0.16815,0.16717,0.18253,0.16741,0.17525,0.10955,0.48548,0.51191,0.50372,0.46739,0.4718,0.45554,0.46117,0.3896,0.4416,0.4824,0.39657,0.36627,0.43361,0.39517,0.38423,0.34766,0.38318,0.39385,0.38502,0.18065,0.16659,0.15919,0.17045,0.18013,0.18073,0.17231,0.1741,0.17126,0.16977,0.15735,0.17122,0.16677,0.17742,0.16006,0.15668,0.17555,0.11564,0.46144,0.44009,0.49889,0.4081,0.41602,0.45552,0.49721,0.53459,0.50325,0.416,0.34885,0.3883,0.37879,0.37289,0.37909,0.38478,0.4395,0.398,0.17392,0.14909,0.17013,0.17099,0.17842,0.17605,0.16541,0.16885,0.17208,0.17553,0.16852,0.19222,0.18147,0.18287,0.17786,0.18711,0.1743,0.16322,0.11685,0.55882,0.44561,0.43481,0.43402,0.45578,0.30522,0.4454,0.43171,0.39726,0.47985,0.40169,0.38438,0.41565,0.35486,0.38152,0.36533,0.33894,0.38905,0.17401,0.17839,0.1744,0.15615,0.16825,0.16516,0.17157,0.1699,0.16611,0.17133,0.17803,0.1745,0.17653,0.17348,0.17148,0.17221,0.16336,0.11709,0.11877,0.1158,0.46725,0.49252,0.5538,0.42461,0.5058,0.47859,0.47151,0.4259,0.47802,0.37137,0.38907,0.37369,0.40997,0.44733,0.38232,0.17307,0.16995,0.17554,0.1738,0.16576,0.16593,0.16827,0.16605,0.18647,0.17375,0.16909,0.1675,0.17015,0.19375,0.16875,0.16818,0.17275,0.18432,0.1189,0.11214,0.11772,0.11466,0.46642,0.42241,0.43697,0.46196,0.46022,0.45976,0.49519,0.52006,0.44061,0.44356,0.45918,0.39503,0.17021,0.16596,0.17073,0.16746,0.18102,0.15965,0.16422,0.17522,0.17766,0.16945,0.16707,0.18021,0.16997,0.19251,0.17143,0.19084,0.16836,0.18583,0.16426,0.16284,0.11249,0.11663,0.12291,0.12087,0.11574,0.11804,0.53824,0.45893,0.59106,0.39112,0.54484,0.44594,0.45996,0.49105,0.17244,0.16046,0.17662,0.16068,0.15711,0.17242,0.17535,0.1825,0.18058,0.16906,0.18695,0.1515,0.1926,0.16934,0.1761,0.16793,0.17155,0.17889,0.16751,0.17249,0.17421,0.18091,0.17626,0.11086,0.11439,0.11787,0.11797,0.11391,0.11418,0.41356,0.46696,0.40474,0.44709,0.

45648,0.1189,0.12479,0.18124,0.17052,0.18226,0.16819,0.17896,0.18583,0.1662,0.16571,0.15655,0.18355,0.16407,0.18032,0.17716,0.17651,0.15869,0.17108,0.18179,0.17715,0.16931,0.15952,0.18102,0.12475,0.11381,0.11514,0.11476,0.11351,0.11457,0.123,0.1092,0.11781,0.11428,0.50895,0.49605,0.11233,0.1155,0.11509,0.11846,0.17642,0.17354,0.16636,0.17994,0.17383,0.17258,0.15682,0.18016,0.18516,0.1768,0.18384,0.16229,0.17563,0.173,0.17487,0.17218,0.16223,0.16643,0.15504,0.11533,0.12259,0.12634,0.1215,0.11049,0.12075,0.1192,0.11761,0.11863,0.11046,0.11782,0.11654,0.10976,0.11456,0.11827,0.11341,0.11202,0.17855,0.1716,0.17453,0.1626,0.17092,0.16866,0.17219,0.17401,0.17524,0.17756,0.17781,0.16628,0.17597,0.17815,0.17181,0.1713,0.11656,0.11093,0.11411,0.11504,0.1198,0.11398,0.11876,0.12181,0.11583,0.11406,0.11623,0.12191,0.11741,0.10848,0.11434,0.11546,0.11797,0.11885,0.1162,0.18562,0.16769,0.18682,0.16809,0.16787,0.17466,0.1744,0.16435,0.16787,0.16126,0.17406,0.17703,0.17829,0.11895,0.11377,0.11167,0.11182,0.11414,0.11263,0.12019,0.11863,0.11661,0.11701,0.12374,0.11483,0.11361,0.11272,0.11904,0.11701,0.11816,0.1172,0.11611,0.11975,0.10259,0.17409,0.1885,0.16993,0.15959,0.16931,0.18046,0.17752,0.16265,0.1577,0.1112,0.11971,0.11854,0.11788,0.11387,0.12103,0.11514,0.121,0.11925,0.11472,0.12123,0.11792,0.12028,0.12038,0.11409,0.11525,0.11489,0.11528,0.11364,0.11269,0.11613,0.11182,0.1239,0.11701,0.11482,0.16396,0.17937,0.15653,0.18454,0.11577,0.11032,0.1145,0.11348,0.12066,0.11102,0.11568,0.12056,0.11941,0.11186,0.111,0.11645,0.11556,0.1154,0.11587,0.11452,0.11507,0.11951,0.1214,0.11261,0.11385,0.1179,0.1148,0.11968,0.11492,0.11668,0.11696,0.1064,0.11357,0.11602,0.11251,0.11436,0.11877,0.11483,0.11586,0.11832,0.11034,0.11568,0.11233,0.12168,0.11638,0.11181,0.1153,0.11425,0.11788,0.11903,0.128,0.12199,0.11571,0.1161,0.11176,0.11004,0.11777,0.11945,0.11131,0.11854,0.11752,0.11558,0.12021,0.11093,0.11269,0.12218,0.1178,0.12012,0.11146,0.11934,0.11493,0.11536,0.11752,0.11851,0.11081,0.10797,0.11237,0.11408,0.11614,0.12604,0.1133,0.11687,0.11605,0.11073,0.11283,0.11143,0.12233,0.11708,0.11739,0.11584,0.12096,0.10742,0.11976,0.12967,0.11451,0.10449,0.1175,0.10963,0.11392,0.12224,0.11097,0.11194,0.11173,0.11655,0.11898,0.12317,0.10837,0.11446,0.1212,0.11276,0.10466,0.11573,0.11936,0.11281,0.1208,0.11561,0.11119,0.11532,0.11664,0.12292,0.11278,0.111,0.12137,0.11249,0.11719,0.11296,0.11926,0.11553,0.11149,0.11373,0.11837,0.11502,0.11539,0.12643,0.11764,0.11593,0.11362,0.11967,0.11324,0.11309,0.11663,0.12091,0.11098,0.11896,0.11129,0.11217,0.11548,0.11326,0.11306,0.10979,0.11432,0.10881,0.11481,0.10902,0.12301,0.11015,0.11347,0.11626,0.12505,0.11725,0.12363,0.1164,0.1166,0.1152,0.11738,0.11007,0.11287,0.12296,0.11608,0.11927,0.11409,0.11595,0.11488,0.12063,0.11481,0.12201,0.12348,0.11666,0.11213,0.11728,0.11757,0.12327,0.12428,0.11329,0.11423,0.12473,0.11678,0.11407,0.11341,0.1113,0.11501,0.11313,0.11618,0.11848,0.11659,0.1138,0.11472,0.11587,0.12273

0.21052,0.21793,0.20602,0.20722,0.22592,0.21851,0.21626,0.20937,0.21192,0.21324,0.2159,0.22921,0.21375,0.21649,0.21714,0.22451,0.22697,0.22031,0.21361,0.20703,0.43051,0.45579,0.46742,0.37825,0.21431,0.21173,0.2117,0.22236,0.21168,0.21686,0.21366,0.21105,0.21903,0.22266,0.21113,0.21838,0.22249,0.22343,0.21872,0.65386,0.4562,0.4162,0.43782,0.45767,0.39986,0.4271,0.21806,0.22689,0.21249,0.21149,0.21724,0.20248,0.21247,0.2129,0.21738,0.20906,0.22695,0.22164,0.21749,0.21474,0.21548,0.61572,0.68224,0.41364,0.4457,0.48355,0.47915,0.39619,0.45012,0.46666,0.44455,0.2181,0.21773,0.21344,0.21633,0.22256,0.2172,0.22335,0.21585,0.2264,

0.20639,0.2222,0.21765,0.20698,0.22336,0.21624,0.59642,0.69416,0.65911  
,0.36846,0.45581,0.44464,0.43718,0.49294,0.38994,0.44144,0.40305,0.451  
14,0.21406,0.2216,0.22,0.21532,0.21672,0.21658,0.21403,0.21618,0.21885  
,0.21254,0.2247,0.22113,0.21418,0.21403,0.22091,0.2192,0.68067,0.62708  
,0.56997,0.51779,0.45129,0.44392,0.40978,0.44253,0.43286,0.43873,0.435  
97,0.50216,0.43807,0.41663,0.21397,0.21246,0.21455,0.22175,0.21465,0.2  
1344,0.2198,0.20861,0.206,0.20506,0.22366,0.21954,0.21259,0.2183,0.212  
16,0.20653,0.70386,0.64908,0.7782,0.56106,0.71584,0.60031,0.42498,0.48  
031,0.48209,0.4758,0.42245,0.44849,0.47259,0.49539,0.47972,0.38154,0.2  
1738,0.21832,0.20945,0.22188,0.21671,0.22863,0.21568,0.21311,0.20907,0  
.21987,0.22818,0.22503,0.20232,0.21637,0.22493,0.21449,0.20991,0.64924  
,0.60512,0.60564,0.65192,0.72135,0.49976,0.46247,0.43555,0.40126,0.421  
25,0.48958,0.38185,0.37308,0.42861,0.40607,0.44158,0.41044,0.21722,0.2  
1289,0.21635,0.21939,0.22246,0.21384,0.2121,0.21167,0.20965,0.21204,0.  
22427,0.21946,0.21839,0.15563,0.1531,0.17388,0.2211,0.59687,0.60485,0.  
62269,0.62609,0.62585,0.67554,0.63108,0.40889,0.47059,0.40831,0.38825,  
0.43217,0.40228,0.44261,0.44392,0.39683,0.35547,0.40537,0.21393,0.2191  
5,0.21129,0.21575,0.21791,0.21628,0.2159,0.22137,0.21741,0.2146,0.2203  
,0.16816,0.15186,0.15004,0.15442,0.14619,0.15145,0.21205,0.64264,0.555  
12,0.68814,0.676,0.68225,0.62161,0.66203,0.4411,0.39181,0.39326,0.5580  
9,0.39745,0.4122,0.4488,0.44706,0.46313,0.44611,0.48913,0.21875,0.2178  
9,0.22285,0.21205,0.2192,0.219,0.20995,0.21486,0.22132,0.15742,0.17588  
,0.15683,0.15926,0.1548,0.19068,0.15989,0.15509,0.16274,0.21634,0.6687  
6,0.6312,0.56039,0.58019,0.74759,0.69323,0.61415,0.46146,0.39127,0.440  
82,0.38309,0.37728,0.41014,0.36994,0.46339,0.39337,0.40231,0.4042,0.46  
169,0.22075,0.21237,0.21073,0.20873,0.22064,0.22199,0.17865,0.1603,0.1  
6657,0.15408,0.15343,0.15427,0.17045,0.16185,0.16871,0.15957,0.12118,0.  
.15417,0.5512,0.47951,0.65407,0.75397,0.66158,0.62101,0.65135,0.38314,  
0.4411,0.49573,0.42042,0.58142,0.43315,0.4211,0.40556,0.42999,0.43081,  
0.44053,0.4245,0.22203,0.21516,0.2181,0.14274,0.1516,0.14677,0.17301,0.  
.14458,0.15999,0.1431,0.15635,0.14189,0.16948,0.13934,0.15535,0.15589,  
0.15589,0.15126,0.60994,0.60213,0.68719,0.62415,0.68883,0.6558,0.66708  
,0.65123,0.70479,0.43072,0.43739,0.38362,0.40012,0.45516,0.48737,0.471  
26,0.43867,0.41191,0.43283,0.49484,0.15785,0.15433,0.16768,0.15475,0.1  
5885,0.15242,0.15696,0.1559,0.16616,0.14783,0.15408,0.15911,0.15093,0.  
15087,0.166,0.17747,0.16014,0.16175,0.63795,0.58103,0.56971,0.58149,0.  
62376,0.71235,0.62926,0.80624,0.62662,0.43704,0.43056,0.33978,0.2589,0.  
.32421,0.24704,0.32629,0.27253,0.35755,0.34053,0.30923,0.16539,0.15557  
,0.16007,0.14541,0.13386,0.14855,0.17375,0.1375,0.15913,0.16481,0.1455  
,0.15879,0.15548,0.16234,0.15569,0.15379,0.13865,0.16675,0.6598,0.5784  
6,0.62002,0.66136,0.6258,0.71509,0.63782,0.64267,0.56785,0.36718,0.322  
37,0.30307,0.32325,0.26286,0.29654,0.30131,0.33747,0.34164,0.33693,0.2  
8642,0.16655,0.1432,0.15844,0.1593,0.15809,0.15598,0.16512,0.15601,0.1  
4754,0.16058,0.15613,0.14951,0.16263,0.16181,0.16737,0.1502,0.16423,0.  
15763,0.61069,0.65214,0.659,0.5967,0.67262,0.6107,0.60643,0.33761,0.36  
944,0.34559,0.34208,0.28194,0.33263,0.31534,0.34446,0.33293,0.33355,0.  
33415,0.30171,0.29648,0.16009,0.15614,0.16204,0.16252,0.16173,0.16612,  
0.14898,0.16263,0.15578,0.15269,0.15823,0.15935,0.1613,0.14693,0.15274  
,0.15891,0.15303,0.14895,0.65253,0.66,0.62645,0.6429,0.6879,0.57631,0.  
35891,0.38643,0.33828,0.39835,0.40751,0.34675,0.3214,0.25736,0.28287,0.  
.32901,0.30916,0.34725,0.36797,0.27543,0.17363,0.14537,0.13922,0.15925  
,0.16286,0.16414,0.16073,0.17425,0.16153,0.1612,0.16271,0.15681,0.1534

2,0.15691,0.15608,0.15785,0.15379,0.15147,0.60714,0.67509,0.7304,0.622  
97,0.58213,0.35829,0.34201,0.38461,0.31988,0.32643,0.38682,0.30203,0.3  
2158,0.33118,0.29822,0.30507,0.34984,0.28079,0.33476,0.30207,0.16244,0  
.16704,0.16006,0.17685,0.14642,0.13577,0.15318,0.14447,0.17153,0.16322  
,0.14518,0.14567,0.15464,0.16382,0.16621,0.16083,0.15754,0.15273,0.662  
61,0.59467,0.56123,0.38794,0.28572,0.35976,0.35863,0.33059,0.3629,0.39  
739,0.41426,0.29652,0.31526,0.28249,0.32774,0.32902,0.31715,0.32239,0.  
33828,0.29481,0.14542,0.16235,0.15155,0.15757,0.15625,0.16827,0.1489,0  
.16606,0.16629,0.15259,0.15794,0.15468,0.16164,0.14835,0.13932,0.15145  
,0.15167,0.14916,0.62697,0.3744,0.41987,0.40805,0.41477,0.32659,0.3356  
5,0.36482,0.44617,0.41302,0.31662,0.30618,0.27963,0.30904,0.27072,0.34  
413,0.2576,0.28934,0.2952,0.15794,0.16008,0.16136,0.16114,0.15164,0.13  
938,0.14734,0.15896,0.15074,0.1553,0.16716,0.16449,0.14763,0.15273,0.1  
6578,0.15308,0.16011,0.089622,0.37996,0.39585,0.38175,0.36447,0.38742,  
0.35864,0.35817,0.32921,0.31865,0.37434,0.31593,0.29294,0.35514,0.3236  
,0.31306,0.28869,0.30314,0.30608,0.32874,0.16512,0.14921,0.14292,0.154  
1,0.16837,0.1652,0.15489,0.15938,0.1593,0.15143,0.14056,0.1528,0.14666  
,0.16023,0.1424,0.1395,0.15828,0.094178,0.34988,0.3341,0.39128,0.31926  
,0.31249,0.35466,0.39474,0.43044,0.40312,0.3247,0.29215,0.32585,0.3094  
6,0.30779,0.29369,0.32838,0.37601,0.33775,0.1579,0.13172,0.15499,0.154  
9,0.16536,0.16231,0.14828,0.15776,0.15432,0.16167,0.14919,0.18123,0.16  
953,0.16905,0.16046,0.17143,0.15753,0.15067,0.094648,0.45359,0.36644,0  
.33367,0.3352,0.34564,0.2469,0.34909,0.33105,0.3195,0.37503,0.32519,0.  
30433,0.35501,0.29658,0.31387,0.27282,0.27789,0.31973,0.15492,0.16002,  
0.15864,0.14184,0.15416,0.14843,0.15723,0.15557,0.15361,0.15631,0.1648  
,0.15999,0.15993,0.15771,0.15395,0.15846,0.14856,0.099016,0.097001,0.0  
95475,0.37181,0.3785,0.44568,0.34197,0.41672,0.37284,0.38657,0.3319,0.  
39085,0.30678,0.31309,0.30675,0.33149,0.36899,0.32111,0.1588,0.15367,0  
.16487,0.15608,0.15273,0.14887,0.1537,0.15043,0.17561,0.15681,0.15374,  
0.15287,0.15529,0.17646,0.15187,0.15569,0.15595,0.1702,0.098958,0.0938  
05,0.095737,0.096584,0.36547,0.32265,0.35704,0.35494,0.38043,0.38562,0  
.38758,0.42644,0.33812,0.35728,0.3839,0.31457,0.15423,0.15103,0.15654,  
0.15232,0.16375,0.1423,0.15009,0.15931,0.16192,0.15297,0.1523,0.16464,  
0.15439,0.1767,0.15779,0.17571,0.15276,0.17004,0.14319,0.14623,0.09235  
4,0.098818,0.10283,0.10175,0.097847,0.097606,0.42274,0.36703,0.49139,0  
.2996,0.45772,0.34314,0.34822,0.38002,0.15796,0.14443,0.15925,0.14804,  
0.1407,0.1561,0.15667,0.16707,0.16432,0.15505,0.17272,0.13666,0.17893,  
0.15322,0.1625,0.14663,0.1536,0.16311,0.15079,0.15824,0.15639,0.16344,  
0.15779,0.090266,0.093414,0.094969,0.0982,0.093346,0.096821,0.31075,0.  
36315,0.33274,0.345,0.36824,0.10074,0.10675,0.1665,0.15643,0.16749,0.1  
534,0.16683,0.16783,0.14951,0.14987,0.14312,0.16661,0.14836,0.16448,0.  
16332,0.15964,0.13824,0.15661,0.16303,0.16108,0.15504,0.14735,0.16621,  
0.10239,0.096999,0.095428,0.096499,0.090527,0.094071,0.1024,0.091494,0  
.098054,0.094788,0.41636,0.3929,0.095521,0.093534,0.095372,0.09696,0.1  
6294,0.15804,0.15213,0.16445,0.15691,0.15415,0.14043,0.16456,0.16656,0  
.16067,0.17177,0.14778,0.16144,0.15883,0.16122,0.158,0.14829,0.15022,0  
.14045,0.10067,0.10165,0.10343,0.10092,0.092,0.096973,0.096855,0.09636  
1,0.097086,0.088554,0.098647,0.099074,0.090193,0.094633,0.098075,0.096  
031,0.090866,0.16292,0.1565,0.1576,0.14732,0.15679,0.15112,0.15468,0.1  
5697,0.15903,0.16546,0.16296,0.14983,0.16176,0.15841,0.15495,0.15963,0  
.095889,0.093005,0.091458,0.092958,0.10136,0.094533,0.10051,0.10331,0.  
095473,0.094837,0.093792,0.10031,0.098407,0.089272,0.095598,0.097235,0

.10093,0.099634,0.098127,0.16903,0.15294,0.17559,0.15561,0.15409,0.16083,0.15992,0.15005,0.15111,0.14679,0.15702,0.16352,0.16106,0.099207,0.094561,0.089301,0.091862,0.09674,0.090545,0.099651,0.098989,0.097376,0.097753,0.10629,0.095815,0.097022,0.09546,0.098316,0.09718,0.10028,0.09669,0.093948,0.099535,0.084482,0.16105,0.17318,0.15516,0.14324,0.15362,0.1668,0.15987,0.14945,0.14323,0.093541,0.098538,0.099061,0.099844,0.092783,0.10261,0.09464,0.10134,0.097763,0.095003,0.09883,0.099404,0.098271,0.1023,0.09572,0.096775,0.096519,0.095307,0.094482,0.09609,0.095806,0.090445,0.10497,0.096514,0.094635,0.14586,0.1625,0.13996,0.17115,0.09734,0.090551,0.096466,0.093001,0.10188,0.093021,0.097699,0.10255,0.098869,0.094946,0.090494,0.096729,0.09262,0.096766,0.094508,0.094189,0.094375,0.10127,0.10446,0.092737,0.093712,0.095128,0.095487,0.099788,0.094586,0.095905,0.097231,0.090571,0.094274,0.095325,0.095468,0.094419,0.098023,0.09285,0.097145,0.10049,0.091735,0.095873,0.090402,0.10561,0.098857,0.092804,0.099418,0.093469,0.099916,0.10037,0.10583,0.10329,0.092788,0.098704,0.094076,0.092593,0.098269,0.095372,0.094929,0.096937,0.10013,0.094332,0.10069,0.09236,0.093535,0.10357,0.095596,0.097606,0.092713,0.098753,0.094627,0.093774,0.098433,0.099774,0.088744,0.08652,0.093668,0.094483,0.096768,0.10759,0.094121,0.097881,0.098115,0.09181,0.091576,0.089888,0.10549,0.098953,0.09607,0.098065,0.10203,0.088832,0.099612,0.10952,0.094644,0.08686,0.095155,0.087878,0.097347,0.10075,0.089755,0.091423,0.090499,0.096419,0.10118,0.10118,0.090517,0.094946,0.099349,0.093734,0.087694,0.095738,0.098673,0.093315,0.1016,0.096761,0.091821,0.095767,0.094597,0.10002,0.092725,0.090946,0.098608,0.092097,0.099231,0.093608,0.098777,0.095569,0.093098,0.0936,0.095624,0.096515,0.097594,0.10631,0.094818,0.093672,0.094632,0.097966,0.093595,0.09433,0.098032,0.097919,0.0907,0.096906,0.094247,0.092233,0.094673,0.094803,0.094077,0.090942,0.095076,0.08665,0.096894,0.091167,0.10079,0.094181,0.097763,0.098921,0.10612,0.096553,0.1062,0.095455,0.097563,0.095955,0.096934,0.089437,0.09548,0.10467,0.094845,0.097853,0.094406,0.098412,0.09406,0.099068,0.094515,0.099212,0.10305,0.099494,0.092837,0.098361,0.095419,0.09979,0.10138,0.094856,0.094201,0.099532,0.095794,0.095742,0.093629,0.093787,0.095429,0.093277,0.094898,0.09689,0.094235,0.094975,0.096082,0.095576,0.099875

0.19344,0.20471,0.19204,0.19654,0.21028,0.20112,0.20165,0.19347,0.19471,0.19458,0.20057,0.21457,0.19724,0.20246,0.20214,0.2119,0.21145,0.20283,0.1991,0.19456,0.37252,0.37825,0.38591,0.31692,0.20334,0.19603,0.19727,0.2083,0.198,0.20208,0.19736,0.19504,0.20423,0.20676,0.19922,0.20012,0.20775,0.204,0.20263,0.54343,0.40676,0.36557,0.39257,0.37908,0.3424,0.34636,0.2015,0.21283,0.19678,0.19804,0.19627,0.19113,0.19218,0.19909,0.20243,0.19091,0.21152,0.20439,0.20556,0.1987,0.2015,0.53349,0.59757,0.36265,0.37869,0.3648,0.41778,0.36413,0.39267,0.39217,0.38208,0.19899,0.19985,0.19886,0.20808,0.20821,0.20221,0.20628,0.20241,0.21263,0.19569,0.20616,0.20506,0.19034,0.20688,0.20513,0.52418,0.55014,0.57823,0.31571,0.39192,0.38302,0.3926,0.41205,0.33836,0.38956,0.36647,0.38356,0.19284,0.20425,0.20262,0.20276,0.20319,0.20195,0.20219,0.1998,0.20273,0.20007,0.20537,0.20428,0.20275,0.19753,0.20434,0.2069,0.60006,0.50916,0.46065,0.4347,0.38873,0.36724,0.34929,0.38294,0.36175,0.3557,0.35806,0.4167,0.39686,0.38343,0.20075,0.19715,0.1984,0.20528,0.20215,0.19747,0.20294,0.20049,0.18976,0.18817,0.20544,0.20297,0.19744,0.20428,0.20035,0.1913,0.5858,0.54996,0.66691,0.44025,0.60255,0.47732,0.35955,0.39627,0.43485,0.41897,0.33565,0.39441,0.41053,0.43419,0.40599,0.31093,0

.20392,0.20105,0.19534,0.2044,0.20149,0.2097,0.20067,0.19905,0.19943,0.20645,0.21038,0.21081,0.19042,0.20352,0.2079,0.20044,0.1978,0.53821,0.49195,0.45794,0.54808,0.60914,0.46742,0.40937,0.36912,0.35312,0.32851,0.41353,0.33816,0.3071,0.38498,0.3499,0.39908,0.34783,0.20021,0.19824,0.20111,0.20419,0.20828,0.20143,0.19886,0.19855,0.19568,0.19514,0.21209,0.20566,0.20414,0.13876,0.13724,0.1581,0.20735,0.48779,0.49118,0.53994,0.5463,0.49315,0.53706,0.55296,0.36156,0.41244,0.33431,0.31828,0.33356,0.34755,0.38053,0.38284,0.33225,0.30987,0.35912,0.19455,0.20157,0.19595,0.19728,0.20701,0.19923,0.19848,0.20366,0.20476,0.19636,0.20548,0.15562,0.13726,0.13355,0.13677,0.13119,0.13713,0.19754,0.56351,0.42175,0.49319,0.57535,0.57903,0.51942,0.52802,0.3676,0.33261,0.32552,0.47966,0.34373,0.35903,0.39295,0.34733,0.40137,0.39384,0.40646,0.20371,0.20325,0.20492,0.19708,0.19981,0.20128,0.19681,0.1963,0.20371,0.14001,0.15963,0.13898,0.14314,0.1408,0.17412,0.1441,0.13938,0.14841,0.20241,0.58094,0.4882,0.48934,0.4693,0.61672,0.55937,0.51238,0.39937,0.33621,0.3672,0.3222,0.32092,0.34861,0.32389,0.39714,0.35134,0.36238,0.34141,0.39932,0.20777,0.19581,0.19589,0.19246,0.20406,0.20113,0.15917,0.14625,0.15033,0.13809,0.13851,0.1372,0.15104,0.14733,0.15134,0.14452,0.10694,0.13778,0.43787,0.41408,0.49954,0.64143,0.56966,0.52979,0.56911,0.32197,0.36702,0.43318,0.36232,0.51359,0.38474,0.38444,0.34632,0.36541,0.35978,0.36975,0.35288,0.20861,0.20156,0.20097,0.12458,0.13938,0.13265,0.15427,0.12921,0.14374,0.12758,0.13716,0.1287,0.15691,0.12552,0.13784,0.14037,0.14089,0.13694,0.50562,0.46821,0.56762,0.54295,0.57888,0.52791,0.5164,0.55527,0.56523,0.37698,0.3806,0.33658,0.34785,0.39558,0.42828,0.39755,0.37312,0.33631,0.36271,0.41749,0.13852,0.13801,0.15473,0.14147,0.14308,0.13948,0.14009,0.13931,0.15321,0.13362,0.13731,0.14208,0.13463,0.13812,0.14938,0.15937,0.14604,0.148,0.50949,0.49558,0.44639,0.46593,0.52403,0.61471,0.51384,0.66302,0.52467,0.38889,0.36358,0.289,0.22896,0.27974,0.21231,0.28905,0.2273,0.29307,0.28994,0.26165,0.14857,0.14237,0.14204,0.12908,0.11957,0.13375,0.15396,0.1232,0.14509,0.14491,0.13178,0.14581,0.13758,0.14756,0.135,0.13638,0.12491,0.1487,0.59622,0.51948,0.50976,0.55785,0.53025,0.5848,0.53254,0.50086,0.45186,0.28888,0.28122,0.2445,0.28228,0.22752,0.25386,0.25398,0.28923,0.28887,0.30784,0.23991,0.14712,0.12623,0.13963,0.14082,0.13952,0.13857,0.14978,0.1396,0.13066,0.14693,0.14206,0.13247,0.14353,0.14733,0.1497,0.13331,0.14772,0.14328,0.4839,0.54959,0.51255,0.50238,0.57812,0.4972,0.53301,0.29442,0.31307,0.28251,0.31218,0.25,0.29759,0.26592,0.30169,0.28813,0.28291,0.26428,0.26126,0.24225,0.14278,0.13995,0.14646,0.14516,0.14769,0.149,0.13174,0.14811,0.1404,0.13566,0.14128,0.14633,0.1443,0.13406,0.13844,0.14101,0.1374,0.1342,0.52439,0.54797,0.54223,0.52439,0.59285,0.4595,0.29316,0.35028,0.28511,0.36321,0.3379,0.28954,0.28148,0.22476,0.24251,0.2795,0.25653,0.28836,0.31342,0.24282,0.16063,0.12762,0.12338,0.14227,0.14781,0.14703,0.146,0.1567,0.14564,0.14584,0.14462,0.14028,0.13814,0.13853,0.13675,0.14053,0.13917,0.13339,0.49135,0.55775,0.59506,0.50861,0.47673,0.31098,0.29702,0.33048,0.27126,0.24865,0.33646,0.25994,0.26564,0.27823,0.25874,0.25402,0.28199,0.22459,0.28621,0.24758,0.15096,0.15262,0.14033,0.15932,0.13079,0.12158,0.1397,0.12927,0.15769,0.14839,0.12837,0.13161,0.13866,0.14657,0.14596,0.14716,0.14316,0.13467,0.54778,0.45076,0.46409,0.31955,0.2321,0.286,0.30938,0.2569,0.28463,0.31841,0.33738,0.26162,0.25491,0.24119,0.27367,0.27947,0.28069,0.27971,0.28972,0.26339,0.13054,0.14476,0.13419,0.14095,0.14423,0.15293,0.13267,0.14948,0.15107,0.13913,0.14001,0.13579,0.14588,0.13136,0.12139,0.13679,

0.13704,0.13478,0.50601,0.32384,0.34246,0.35276,0.36418,0.27949,0.2941  
1,0.29939,0.37469,0.35454,0.25852,0.25705,0.24015,0.27042,0.23612,0.30  
51,0.20306,0.24476,0.24629,0.14356,0.14598,0.14466,0.14134,0.1364,0.12  
281,0.13322,0.14217,0.13219,0.14167,0.14917,0.14826,0.13192,0.13816,0.  
15277,0.14062,0.14663,0.074003,0.32002,0.32509,0.32648,0.31552,0.32019  
,0.30838,0.30872,0.26918,0.25778,0.33201,0.26808,0.26454,0.31304,0.264  
69,0.25316,0.25346,0.24251,0.2751,0.28642,0.15071,0.13521,0.12814,0.14  
012,0.15275,0.14771,0.14004,0.1447,0.14373,0.13369,0.12767,0.13733,0.1  
3259,0.14766,0.12657,0.12519,0.14645,0.07828,0.27241,0.29007,0.32264,0  
.2739,0.27176,0.28731,0.35947,0.36012,0.34409,0.26637,0.24647,0.28411,  
0.26649,0.25318,0.2431,0.28778,0.32926,0.27473,0.14351,0.12026,0.14047  
,0.139,0.1479,0.14378,0.12877,0.142,0.14011,0.14457,0.13529,0.16196,0.  
15655,0.15475,0.14132,0.15801,0.13834,0.13469,0.07884,0.36475,0.31811,  
0.25607,0.27092,0.29091,0.19989,0.28657,0.25829,0.26435,0.30283,0.2850  
1,0.25378,0.30338,0.26477,0.25442,0.23361,0.2442,0.28341,0.13964,0.145  
45,0.14037,0.1259,0.13844,0.13085,0.1409,0.14233,0.13905,0.1377,0.1499  
7,0.14788,0.14409,0.14211,0.14136,0.14109,0.13169,0.083975,0.081964,0.  
07577,0.31207,0.31669,0.38746,0.28554,0.36832,0.31644,0.31721,0.27189,  
0.33691,0.26244,0.25869,0.24796,0.28396,0.31905,0.27301,0.14423,0.1390  
3,0.15125,0.13908,0.13401,0.13362,0.13704,0.13971,0.16181,0.14277,0.13  
619,0.13662,0.14041,0.16032,0.13879,0.14323,0.14583,0.15156,0.08502,0.  
079448,0.079068,0.077028,0.32173,0.26428,0.29553,0.28348,0.29654,0.334  
29,0.3132,0.36834,0.28057,0.31493,0.33346,0.2696,0.14047,0.13684,0.142  
5,0.13407,0.14799,0.12435,0.13344,0.1402,0.14533,0.13402,0.13653,0.147  
7,0.14148,0.15917,0.14079,0.16004,0.13482,0.1529,0.13011,0.1282,0.0787  
59,0.079917,0.086628,0.083688,0.079483,0.080323,0.37379,0.30359,0.4172  
2,0.22778,0.39417,0.31134,0.27189,0.31175,0.13842,0.12792,0.14686,0.13  
069,0.12923,0.1375,0.14281,0.15456,0.14751,0.13962,0.16212,0.12026,0.1  
6668,0.13773,0.14616,0.1315,0.14199,0.1473,0.13474,0.14334,0.13943,0.1  
5156,0.14438,0.070395,0.077161,0.07966,0.079977,0.078813,0.082333,0.25  
946,0.3053,0.27883,0.26706,0.3053,0.08499,0.090616,0.14896,0.14115,0.1  
5377,0.13701,0.15005,0.14906,0.13286,0.13629,0.12742,0.14907,0.13381,0  
.15139,0.15215,0.14519,0.12545,0.14146,0.1471,0.1434,0.14023,0.1321,0.  
14869,0.085074,0.079591,0.082685,0.079684,0.073797,0.07741,0.087362,0.  
079818,0.081284,0.078415,0.34294,0.33045,0.078852,0.079751,0.078412,0.  
082551,0.14862,0.13992,0.13647,0.15096,0.13952,0.13901,0.12785,0.14892  
,0.15031,0.14267,0.15308,0.13425,0.1447,0.14612,0.14161,0.13787,0.1366  
6,0.13301,0.12472,0.082169,0.086303,0.086666,0.08353,0.074694,0.081939  
,0.078062,0.079921,0.082307,0.070484,0.085513,0.081776,0.075169,0.0788  
04,0.083113,0.077977,0.073049,0.14611,0.13711,0.14495,0.12945,0.13999,  
0.13052,0.13805,0.13819,0.14064,0.14999,0.14684,0.1311,0.14728,0.13941  
,0.13997,0.14088,0.077643,0.077298,0.073771,0.07673,0.083867,0.076932,  
0.082027,0.088484,0.07772,0.076565,0.076691,0.085378,0.081758,0.072714  
,0.079743,0.080168,0.084356,0.081947,0.081956,0.15229,0.13974,0.16092,  
0.14379,0.13839,0.14757,0.14268,0.13625,0.13621,0.12647,0.14234,0.1484  
5,0.14281,0.082524,0.077853,0.074016,0.078909,0.080297,0.078015,0.0831  
17,0.085351,0.078457,0.086331,0.091532,0.083614,0.081373,0.081074,0.07  
983,0.078835,0.084758,0.080402,0.075996,0.082107,0.07034,0.14861,0.154  
94,0.13763,0.12923,0.14198,0.15482,0.14527,0.13437,0.12728,0.079377,0.  
081066,0.081862,0.083608,0.076455,0.084175,0.079617,0.08591,0.081097,0  
.079164,0.081853,0.082511,0.084222,0.083078,0.079631,0.078071,0.081363  
,0.078401,0.078793,0.080062,0.08173,0.077415,0.088305,0.078941,0.07841



7,0.12954,0.14466,0.12387,0.15406,0.08093,0.075338,0.080979,0.075555,0.086018,0.077564,0.081895,0.087936,0.08065,0.079326,0.074302,0.080642,0.077405,0.079517,0.080221,0.07903,0.080727,0.085911,0.089154,0.078214,0.078442,0.078776,0.078594,0.080922,0.080377,0.07885,0.082105,0.075138,0.077565,0.079402,0.078549,0.076925,0.0781,0.080381,0.080166,0.085718,0.075383,0.078628,0.074725,0.085977,0.081335,0.078556,0.082828,0.076467,0.08603,0.084142,0.089535,0.087835,0.075439,0.08149,0.080235,0.075873,0.081778,0.078468,0.080401,0.079926,0.08543,0.078041,0.083829,0.076822,0.077182,0.087022,0.076554,0.083605,0.074725,0.082279,0.075286,0.076306,0.080107,0.081481,0.073188,0.07238,0.078125,0.081382,0.080199,0.091384,0.077387,0.080263,0.081016,0.075807,0.074335,0.073251,0.086066,0.080993,0.081388,0.078692,0.08626,0.074986,0.084928,0.092167,0.078978,0.068719,0.077934,0.071473,0.078521,0.082448,0.074085,0.077377,0.072121,0.07868,0.084942,0.082905,0.072223,0.076694,0.079361,0.079186,0.073283,0.079007,0.080418,0.076599,0.085797,0.077444,0.076738,0.079232,0.082209,0.085179,0.07517,0.074794,0.081447,0.076318,0.083612,0.07398,0.084779,0.079838,0.078695,0.078425,0.076797,0.083841,0.081093,0.087768,0.080672,0.0783,0.077879,0.077476,0.076255,0.076568,0.081929,0.082801,0.075383,0.079053,0.075835,0.076482,0.081869,0.076049,0.079778,0.076206,0.079988,0.07103,0.080341,0.073846,0.085903,0.077285,0.080908,0.08238,0.090079,0.078182,0.087721,0.077208,0.082254,0.080044,0.080516,0.073701,0.079827,0.086856,0.076872,0.084452,0.082373,0.083981,0.07876,0.085718,0.081756,0.08244,0.085242,0.079579,0.074258,0.083354,0.080791,0.083519,0.085117,0.076549,0.075419,0.08193,0.078932,0.080934,0.080421,0.077227,0.077924,0.076811,0.077452,0.081339,0.077106,0.077633,0.077546,0.080202,0.08399

0.1766,0.18788,0.17852,0.18138,0.19244,0.18507,0.18488,0.17292,0.17968,0.17955,0.18018,0.19477,0.18455,0.18496,0.18343,0.19462,0.19445,0.18887,0.18664,0.17911,0.32699,0.32823,0.34338,0.28213,0.18702,0.18174,0.18557,0.19258,0.18069,0.18494,0.17865,0.18596,0.18269,0.19034,0.18487,0.18575,0.19221,0.19097,0.18677,0.4936,0.3516,0.34601,0.3464,0.34595,0.29211,0.31154,0.18747,0.19606,0.18013,0.18136,0.18051,0.18114,0.17311,0.17995,0.18629,0.18135,0.19903,0.18603,0.19106,0.18378,0.18235,0.43698,0.48164,0.29855,0.3494,0.28506,0.35116,0.3088,0.3297,0.3606,0.34343,0.18348,0.18224,0.17776,0.18809,0.19025,0.18696,0.18791,0.18335,0.19713,0.17957,0.19292,0.191,0.17368,0.19068,0.19244,0.4592,0.47862,0.52457,0.2738,0.36148,0.33415,0.34465,0.36542,0.28939,0.29983,0.31636,0.35443,0.17744,0.18744,0.19166,0.18316,0.1857,0.17939,0.18031,0.18024,0.18708,0.18192,0.19076,0.18675,0.18929,0.18745,0.18889,0.18803,0.49963,0.44285,0.38219,0.35755,0.32461,0.29907,0.31645,0.32866,0.31557,0.31954,0.32039,0.39787,0.35644,0.33879,0.18822,0.18154,0.18278,0.18767,0.18579,0.17944,0.19093,0.18479,0.17624,0.17372,0.19137,0.18543,0.18269,0.18533,0.1827,0.1781,0.50589,0.47981,0.58898,0.41118,0.57459,0.43559,0.31782,0.34981,0.40001,0.37798,0.29509,0.36431,0.36798,0.40916,0.35935,0.2713,0.19065,0.18589,0.18361,0.18893,0.18566,0.18903,0.18663,0.18587,0.18662,0.18987,0.19339,0.19372,0.17424,0.1926,0.18927,0.18754,0.18347,0.49223,0.44158,0.34503,0.47954,0.4922,0.41169,0.35989,0.32647,0.30971,0.29675,0.38608,0.29499,0.27092,0.31175,0.32065,0.33924,0.3142,0.18349,0.1798,0.18469,0.18825,0.18886,0.18374,0.18208,0.18677,0.17681,0.1785,0.19255,0.1918,0.18777,0.12271,0.1216,0.14349,0.18886,0.40219,0.4465,0.49664,0.48398,0.42628,0.45894,0.48766,0.32206,0.35903,0.27861,0.29674,0.30353,0.29279,0.35944,0.32727,0.31956,0.29074,0.32322,0.17968,0.18

032,0.17984,0.18601,0.19556,0.18448,0.18524,0.18739,0.18875,0.18413,0.18598,0.14103,0.12939,0.12075,0.11849,0.11941,0.12291,0.1804,0.49299,0.34703,0.45627,0.49945,0.4723,0.46743,0.49407,0.3278,0.29061,0.28784,0.40861,0.29376,0.31242,0.36266,0.30589,0.35946,0.34715,0.36566,0.18799,0.18738,0.19111,0.18584,0.18735,0.18793,0.18255,0.17911,0.19093,0.12649,0.13982,0.12294,0.13064,0.12694,0.15966,0.12703,0.12828,0.13656,0.18521,0.53738,0.41703,0.43513,0.43785,0.5474,0.46744,0.43601,0.30799,0.29714,0.33962,0.26295,0.2761,0.30967,0.29879,0.32843,0.29072,0.32162,0.31425,0.3734,0.18902,0.1817,0.17867,0.17716,0.19448,0.18353,0.14226,0.13208,0.13385,0.1244,0.1238,0.12362,0.13559,0.13244,0.13738,0.12899,0.09588,0.12344,0.43939,0.33474,0.41462,0.56966,0.47758,0.45094,0.50725,0.28854,0.34249,0.40309,0.31688,0.46497,0.35324,0.34068,0.28387,0.31863,0.33021,0.33813,0.31406,0.1853,0.18468,0.18591,0.1103,0.12424,0.1151,0.13954,0.11531,0.12967,0.1138,0.1205,0.1133,0.14556,0.11094,0.12648,0.12482,0.12337,0.12164,0.4244,0.38712,0.51243,0.4333,0.49509,0.44755,0.45546,0.48141,0.47171,0.33614,0.33121,0.30277,0.31459,0.34631,0.36322,0.36019,0.30988,0.2849,0.31733,0.37215,0.12616,0.12546,0.14003,0.12413,0.12797,0.12687,0.12855,0.12355,0.13903,0.11915,0.12117,0.12566,0.1218,0.12134,0.13417,0.14668,0.13067,0.13373,0.43889,0.47429,0.39593,0.47667,0.41726,0.5724,0.45168,0.60613,0.48563,0.34558,0.32742,0.24788,0.20147,0.24096,0.17469,0.25546,0.21226,0.26985,0.24574,0.24819,0.13142,0.12707,0.12705,0.11366,0.10954,0.12109,0.13984,0.10911,0.13069,0.12765,0.12284,0.12907,0.12406,0.13536,0.12113,0.12371,0.11063,0.13165,0.50449,0.50707,0.42446,0.5223,0.45928,0.50939,0.46273,0.40034,0.3603,0.24548,0.25998,0.22095,0.24613,0.1881,0.22471,0.23091,0.26412,0.2592,0.27912,0.21467,0.1346,0.11614,0.12705,0.13046,0.12671,0.12305,0.13407,0.12325,0.11357,0.13129,0.12858,0.11796,0.13094,0.13469,0.13906,0.12163,0.13319,0.1271,0.42493,0.44302,0.45587,0.42649,0.55369,0.42349,0.47184,0.25938,0.28558,0.25259,0.26316,0.21529,0.25996,0.23456,0.24818,0.25599,0.25779,0.22456,0.21725,0.21518,0.126,0.12796,0.13188,0.13165,0.13402,0.13289,0.11896,0.13264,0.12546,0.12129,0.12832,0.13297,0.13065,0.1213,0.12487,0.12634,0.12631,0.12425,0.47599,0.47011,0.45115,0.41595,0.5178,0.40652,0.26539,0.28265,0.25703,0.3253,0.29717,0.25183,0.24912,0.18899,0.21246,0.25191,0.22909,0.24188,0.27892,0.2127,0.1453,0.11405,0.10816,0.12767,0.13132,0.1306,0.13286,0.14263,0.13081,0.12926,0.12793,0.13124,0.12003,0.12774,0.12006,0.12993,0.12527,0.11864,0.41774,0.49191,0.52246,0.48456,0.36595,0.2563,0.26127,0.27873,0.21439,0.22861,0.30458,0.22791,0.2215,0.2537,0.23576,0.22401,0.23902,0.20795,0.25345,0.20547,0.13569,0.13785,0.1258,0.14887,0.11695,0.10286,0.12296,0.1155,0.13888,0.13683,0.11407,0.11719,0.12411,0.13075,0.13457,0.13184,0.12945,0.12396,0.48551,0.43095,0.41103,0.28322,0.20939,0.24715,0.2833,0.2279,0.26304,0.26995,0.31433,0.23985,0.2316,0.20928,0.25221,0.24003,0.26841,0.24796,0.25148,0.23404,0.12038,0.12988,0.12182,0.12588,0.13284,0.13732,0.12017,0.13521,0.13776,0.1265,0.12529,0.1192,0.133,0.12135,0.10545,0.12376,0.1227,0.12118,0.45613,0.25511,0.30368,0.30856,0.35143,0.24056,0.21164,0.2632,0.34515,0.3067,0.22058,0.23868,0.22686,0.23411,0.20581,0.26756,0.17785,0.208,0.22047,0.13082,0.13276,0.12773,0.13002,0.12063,0.10792,0.11907,0.12746,0.11806,0.12653,0.1349,0.13715,0.1196,0.12121,0.13702,0.12519,0.13178,0.066821,0.27702,0.29884,0.30398,0.2796,0.28962,0.2465,0.26614,0.24406,0.2263,0.27127,0.25987,0.23826,0.2764,0.23162,0.22196,0.21566,0.22372,0.23351,0.25578,0.13514,0.12051,0.11431,0.12292,0.13959,0.13454,0.12478,0.12995,0.12853,0.12268,0.11542,0.12786,0.11

706,0.13306,0.11547,0.11212,0.13382,0.066066,0.23738,0.262,0.29444,0.2  
1801,0.25796,0.2387,0.31859,0.32053,0.26878,0.21124,0.21984,0.2565,0.2  
342,0.22118,0.21477,0.25544,0.30082,0.24601,0.1276,0.10445,0.1253,0.12  
657,0.13187,0.12849,0.11116,0.12587,0.12717,0.12782,0.11969,0.14564,0.  
14186,0.14151,0.12607,0.14113,0.12274,0.12122,0.066733,0.30411,0.28217  
,0.20095,0.2437,0.26404,0.17346,0.26653,0.21006,0.20077,0.25928,0.2575  
,0.22504,0.25892,0.22698,0.22768,0.21001,0.21361,0.24869,0.12592,0.134  
19,0.12559,0.11212,0.1227,0.12039,0.12631,0.13015,0.12803,0.12247,0.13  
731,0.13251,0.12929,0.12701,0.1257,0.12802,0.11957,0.072632,0.071605,0  
.064939,0.28017,0.28722,0.33945,0.24357,0.31418,0.30242,0.26314,0.2543  
3,0.29431,0.23523,0.22863,0.21766,0.25127,0.28347,0.23701,0.12834,0.12  
496,0.13529,0.12756,0.11728,0.11818,0.12314,0.12233,0.14513,0.12977,0.  
12393,0.12363,0.12771,0.14582,0.12399,0.13071,0.13023,0.14022,0.072999  
,0.068047,0.068082,0.060836,0.28457,0.24041,0.24381,0.25272,0.27734,0.  
28279,0.28352,0.31989,0.25674,0.2934,0.29219,0.2576,0.12395,0.12614,0.  
13089,0.11609,0.13696,0.1125,0.12366,0.12714,0.13193,0.12083,0.123,0.1  
3349,0.12765,0.14548,0.12865,0.14926,0.11761,0.13859,0.1146,0.11722,0.  
063937,0.069191,0.074069,0.071853,0.067523,0.069193,0.33389,0.27624,0.  
36783,0.18478,0.3487,0.27912,0.23,0.29662,0.12259,0.11425,0.13263,0.11  
547,0.11648,0.12259,0.13178,0.14011,0.13829,0.12291,0.14622,0.1079,0.1  
4931,0.12654,0.13361,0.11693,0.12775,0.1314,0.12026,0.12856,0.12439,0.  
13807,0.12979,0.0588,0.064644,0.068198,0.070194,0.064778,0.070906,0.20  
585,0.28182,0.23318,0.22146,0.26165,0.070259,0.080107,0.1347,0.13113,0  
.13773,0.1214,0.13371,0.1335,0.11807,0.12057,0.11572,0.13465,0.11738,0  
.13524,0.13552,0.12995,0.11666,0.12708,0.13233,0.12944,0.12535,0.11893  
,0.13396,0.067807,0.066388,0.072827,0.068315,0.06039,0.066039,0.075688  
,0.063951,0.06799,0.065329,0.30267,0.28109,0.065558,0.067952,0.066629,  
0.06659,0.13467,0.12382,0.12231,0.13611,0.12857,0.12659,0.11441,0.1380  
2,0.13437,0.12705,0.139,0.12398,0.13012,0.12948,0.13154,0.12399,0.1238  
3,0.1192,0.11299,0.071421,0.075858,0.074844,0.07152,0.066558,0.068086,  
0.066118,0.067597,0.068009,0.060728,0.071701,0.070533,0.064411,0.06641  
2,0.072247,0.066135,0.061716,0.13297,0.1223,0.13032,0.11733,0.12731,0.  
11704,0.12234,0.123,0.12409,0.13918,0.12984,0.11822,0.13287,0.12636,0.  
12841,0.1254,0.06663,0.062711,0.062771,0.064831,0.071612,0.065979,0.06  
6366,0.076532,0.067195,0.062811,0.065949,0.073944,0.072139,0.061551,0.  
066271,0.066964,0.071056,0.069761,0.070088,0.13527,0.12514,0.14671,0.1  
3082,0.12689,0.13053,0.13016,0.12172,0.12258,0.11613,0.12632,0.13597,0  
.12511,0.067226,0.063997,0.06231,0.069719,0.065791,0.066436,0.073484,0  
.071767,0.06905,0.073324,0.078012,0.073504,0.070038,0.069396,0.064325,  
0.067263,0.069935,0.070121,0.063452,0.068113,0.058143,0.12939,0.13922,  
0.12561,0.11462,0.12906,0.14079,0.13138,0.12291,0.11447,0.065997,0.068  
622,0.069558,0.074047,0.066299,0.072962,0.067492,0.074654,0.066328,0.0  
65266,0.072263,0.069499,0.0702,0.070699,0.068399,0.065384,0.066727,0.0  
68622,0.067374,0.066517,0.068342,0.064133,0.074829,0.068826,0.06594,0.  
11725,0.13181,0.11319,0.14117,0.069572,0.06109,0.070472,0.064408,0.071  
811,0.064257,0.070189,0.075567,0.069741,0.066078,0.061792,0.06872,0.06  
631,0.067936,0.067208,0.070078,0.06791,0.072958,0.07718,0.067013,0.066  
8,0.06768,0.065507,0.06674,0.066865,0.067098,0.067397,0.064884,0.06309  
5,0.065062,0.065747,0.066229,0.06531,0.067177,0.070564,0.070023,0.0643  
87,0.064012,0.066669,0.07181,0.068146,0.06535,0.068414,0.066219,0.0710  
78,0.071795,0.079942,0.074317,0.06308,0.069053,0.06638,0.062395,0.0715  
54,0.065396,0.068866,0.067527,0.071935,0.063775,0.06953,0.063837,0.065

104,0.075445,0.064022,0.072047,0.062903,0.070063,0.0645,0.063391,0.068  
355,0.068281,0.058908,0.059617,0.066346,0.072117,0.066849,0.07768,0.06  
5792,0.068635,0.069718,0.064654,0.061081,0.061206,0.074789,0.068983,0.  
073603,0.06795,0.071947,0.060718,0.072253,0.077141,0.066977,0.057426,0  
.062945,0.062139,0.065913,0.073985,0.064327,0.064778,0.059204,0.063199  
,0.074875,0.070859,0.058656,0.066142,0.069648,0.067472,0.059843,0.0679  
55,0.067787,0.066513,0.069358,0.066661,0.063383,0.066549,0.069151,0.07  
1495,0.061371,0.064093,0.071114,0.066674,0.071011,0.063053,0.07474,0.0  
69869,0.069062,0.066964,0.062658,0.072742,0.069683,0.076262,0.067238,0  
.065778,0.066554,0.064877,0.065301,0.066016,0.068307,0.068807,0.066008  
,0.066545,0.063045,0.062611,0.070424,0.062839,0.068881,0.062954,0.0710  
38,0.060441,0.068165,0.061773,0.069826,0.066263,0.068645,0.071936,0.07  
5679,0.067176,0.072212,0.066275,0.069295,0.067079,0.06843,0.059321,0.0  
67222,0.074355,0.066809,0.070883,0.069489,0.071572,0.066444,0.072625,0  
.06838,0.07135,0.071706,0.064888,0.064369,0.068636,0.066864,0.068313,0  
.071458,0.066625,0.063394,0.071208,0.070234,0.069543,0.070685,0.063882  
,0.066715,0.063883,0.065582,0.068578,0.066575,0.062833,0.06457,0.06846  
3,0.0711  
0.16314,0.17074,0.1652,0.1645,0.18221,0.17201,0.17014,0.15868,0.16577,  
0.16452,0.16644,0.18094,0.16827,0.17219,0.16522,0.17691,0.17204,0.1775  
5,0.17485,0.16079,0.29685,0.30332,0.34657,0.27332,0.17308,0.1696,0.169  
58,0.17407,0.1703,0.17349,0.16419,0.17154,0.17293,0.17045,0.1709,0.172  
83,0.17614,0.17511,0.17088,0.46871,0.33786,0.32598,0.32351,0.33243,0.2  
9607,0.30971,0.16981,0.18085,0.1612,0.16389,0.16513,0.16354,0.15561,0.  
16838,0.17293,0.16652,0.18208,0.17202,0.17422,0.16873,0.16554,0.46458,  
0.44964,0.28193,0.30194,0.27017,0.33036,0.28759,0.31297,0.31986,0.3396  
1,0.16943,0.1679,0.15958,0.17424,0.1773,0.16933,0.17479,0.16918,0.1817  
7,0.16667,0.17646,0.17779,0.16185,0.17704,0.17981,0.43551,0.4208,0.461  
32,0.26025,0.35314,0.32286,0.31089,0.32964,0.26194,0.2799,0.28846,0.31  
059,0.1634,0.17133,0.17939,0.16678,0.1705,0.16634,0.16699,0.16831,0.17  
503,0.1671,0.1796,0.1737,0.17369,0.17031,0.17227,0.17099,0.4374,0.3998  
2,0.34828,0.34881,0.30727,0.25623,0.31078,0.28015,0.29528,0.30056,0.31  
2,0.36568,0.31791,0.32176,0.17266,0.16436,0.17034,0.17152,0.17175,0.17  
056,0.17564,0.17418,0.16623,0.15788,0.17399,0.1681,0.1683,0.16674,0.16  
547,0.16567,0.4531,0.40292,0.48737,0.37821,0.51783,0.38873,0.30334,0.3  
3613,0.37981,0.34537,0.28762,0.33703,0.3283,0.39259,0.34679,0.26123,0.  
18073,0.17545,0.16951,0.17524,0.16726,0.17525,0.17232,0.16572,0.17567,  
0.17203,0.17511,0.17475,0.15896,0.17983,0.17113,0.17408,0.16703,0.4477  
,0.39815,0.2824,0.42194,0.46633,0.36073,0.32413,0.29352,0.27042,0.2680  
8,0.37447,0.27248,0.24076,0.26941,0.29651,0.30892,0.27314,0.16616,0.16  
592,0.16294,0.17293,0.17362,0.16901,0.16464,0.17154,0.16141,0.16612,0.  
1764,0.17581,0.17059,0.11304,0.11405,0.13213,0.16798,0.36094,0.41914,0.  
.47057,0.43242,0.39225,0.39874,0.47513,0.28157,0.32593,0.2236,0.27068,  
0.27831,0.25374,0.34644,0.31368,0.30222,0.26448,0.2886,0.1663,0.17154,  
0.1667,0.1686,0.18074,0.16911,0.16899,0.17089,0.17274,0.16923,0.17188,  
0.12881,0.11885,0.1091,0.10966,0.10366,0.11046,0.16756,0.45799,0.3033,  
0.42634,0.43503,0.41751,0.40722,0.44914,0.31636,0.2698,0.2683,0.35429,  
0.26811,0.29036,0.33875,0.30244,0.34477,0.31457,0.34627,0.17566,0.1718  
5,0.17824,0.17315,0.17398,0.17404,0.16639,0.16215,0.17298,0.11306,0.12  
532,0.11274,0.11889,0.11779,0.14909,0.11355,0.11685,0.12212,0.1737,0.4  
9037,0.33181,0.37006,0.39166,0.53329,0.4588,0.39692,0.26637,0.26494,0.  
31419,0.23854,0.24427,0.26892,0.25073,0.32178,0.26232,0.27148,0.27862,

0.34439,0.17564,0.16782,0.16241,0.16739,0.18016,0.1687,0.13312,0.12051  
,0.1201,0.11164,0.11097,0.11259,0.12259,0.11827,0.12596,0.11954,0.0868  
15,0.11129,0.42235,0.31523,0.4249,0.49865,0.41716,0.43629,0.50297,0.28  
207,0.32608,0.35033,0.2993,0.42717,0.31189,0.30817,0.25626,0.29799,0.2  
7196,0.32176,0.29731,0.17188,0.17215,0.17112,0.097996,0.11288,0.10528,  
0.1215,0.10326,0.12011,0.10396,0.11016,0.10813,0.13434,0.10181,0.1139,  
0.11354,0.10928,0.11175,0.42504,0.38031,0.46983,0.38625,0.46113,0.4179  
5,0.42796,0.45592,0.45629,0.31022,0.31488,0.25054,0.29604,0.34404,0.34  
037,0.33781,0.27565,0.26543,0.30347,0.34574,0.11807,0.1124,0.12743,0.1  
1335,0.11296,0.11706,0.11769,0.11263,0.12464,0.11232,0.10942,0.11064,0  
.11008,0.1087,0.12132,0.13031,0.11614,0.12115,0.39107,0.43147,0.35695,  
0.42858,0.3757,0.52836,0.42988,0.55077,0.46429,0.31476,0.28039,0.24877  
,0.18513,0.22648,0.16045,0.24213,0.17774,0.23886,0.2338,0.22119,0.1180  
7,0.11484,0.1139,0.10015,0.098168,0.10967,0.12548,0.097947,0.11571,0.1  
1773,0.10917,0.11733,0.11578,0.1199,0.10931,0.11005,0.10195,0.12006,0.  
40033,0.46783,0.40394,0.44365,0.46677,0.44454,0.42221,0.38243,0.39066,  
0.21701,0.24466,0.19085,0.22466,0.15415,0.21503,0.21679,0.24325,0.2204  
1,0.26302,0.20645,0.12361,0.10632,0.11488,0.1189,0.11492,0.11083,0.122  
15,0.10622,0.10165,0.11567,0.11354,0.10773,0.11743,0.12238,0.127,0.109  
82,0.1179,0.11476,0.40329,0.37225,0.36524,0.45153,0.53627,0.38388,0.40  
01,0.24973,0.24454,0.23302,0.2177,0.2024,0.25095,0.22066,0.24017,0.238  
18,0.23706,0.19465,0.20844,0.18965,0.11593,0.11646,0.11831,0.11792,0.1  
1825,0.11763,0.10832,0.11997,0.11431,0.10915,0.11329,0.12017,0.12069,0  
.10652,0.11506,0.11655,0.10983,0.11339,0.41978,0.4454,0.4052,0.37184,0  
.45324,0.37595,0.23253,0.25079,0.21854,0.33959,0.2632,0.23907,0.22407,  
0.16445,0.20184,0.2126,0.19841,0.21974,0.26848,0.20016,0.13155,0.10321  
,0.095874,0.11394,0.1206,0.11726,0.11965,0.12993,0.11924,0.11906,0.113  
5,0.11718,0.10901,0.11626,0.10663,0.11877,0.11429,0.10307,0.36579,0.44  
813,0.44663,0.3999,0.30099,0.24108,0.23869,0.2383,0.18127,0.20297,0.25  
708,0.20284,0.20065,0.23423,0.21266,0.19656,0.21218,0.19945,0.23611,0.  
16613,0.11976,0.12478,0.11229,0.13403,0.10877,0.093548,0.11024,0.10534  
,0.12539,0.12519,0.10433,0.10575,0.11446,0.1176,0.1243,0.12009,0.11484  
,0.11445,0.46257,0.38053,0.38159,0.2546,0.17156,0.22878,0.25701,0.2143  
2,0.21894,0.25237,0.2989,0.2157,0.21278,0.18986,0.22701,0.21931,0.2429  
4,0.22413,0.22478,0.22449,0.10429,0.11807,0.10945,0.11542,0.11889,0.12  
697,0.11132,0.12113,0.1266,0.11336,0.11445,0.10624,0.12087,0.10802,0.0  
9585,0.11021,0.11188,0.10819,0.39755,0.21519,0.26542,0.28486,0.31902,0  
.22611,0.20991,0.21646,0.3328,0.26732,0.20535,0.21188,0.21064,0.21141,  
0.19422,0.23083,0.1516,0.17765,0.19603,0.11782,0.12316,0.11862,0.11484  
,0.11104,0.09663,0.11168,0.11417,0.10464,0.11973,0.12038,0.12251,0.106  
5,0.10951,0.1261,0.11197,0.1189,0.058761,0.24664,0.28425,0.28846,0.250  
03,0.23709,0.23527,0.23239,0.21188,0.21063,0.28104,0.25126,0.22051,0.2  
4569,0.20065,0.20465,0.19548,0.20498,0.20684,0.24097,0.12394,0.10868,0  
.10182,0.11108,0.12804,0.12124,0.11264,0.11683,0.11761,0.11029,0.10512  
,0.11197,0.10892,0.12019,0.10345,0.099011,0.1228,0.055139,0.2211,0.237  
59,0.24838,0.22168,0.21423,0.22324,0.29796,0.28153,0.29145,0.21242,0.1  
9527,0.23506,0.20598,0.19851,0.19976,0.22765,0.27174,0.22169,0.11643,0  
.092279,0.11462,0.11247,0.11765,0.11919,0.096614,0.1112,0.11498,0.1113  
4,0.10633,0.13155,0.12883,0.12858,0.11445,0.12834,0.11083,0.11019,0.05  
9386,0.31013,0.24258,0.18072,0.22178,0.23443,0.16141,0.23355,0.19089,0  
.18274,0.26236,0.22167,0.20322,0.22551,0.20394,0.20825,0.19259,0.19049  
,0.23606,0.11356,0.12046,0.11298,0.099826,0.10834,0.10565,0.11669,0.11

977,0.1139,0.11435,0.12279,0.12017,0.1146,0.11466,0.11527,0.11813,0.10  
965,0.062218,0.064536,0.052813,0.27195,0.25954,0.31908,0.23233,0.29291  
,0.26494,0.22917,0.22909,0.26949,0.20505,0.21604,0.21625,0.22663,0.271  
63,0.22388,0.11607,0.11391,0.12462,0.1123,0.1069,0.10961,0.11761,0.108  
98,0.13347,0.1151,0.11108,0.11317,0.11076,0.1315,0.11364,0.11454,0.117  
87,0.13057,0.064425,0.061148,0.059585,0.050992,0.2767,0.23293,0.21677,  
0.21388,0.26342,0.25276,0.25955,0.28728,0.21652,0.25962,0.26363,0.2292  
3,0.10813,0.11293,0.11868,0.10775,0.12579,0.098007,0.11102,0.11761,0.1  
2024,0.11207,0.11307,0.12035,0.11711,0.1292,0.11496,0.13729,0.10825,0.  
12548,0.10137,0.10642,0.055284,0.062549,0.065156,0.062096,0.057883,0.0  
60895,0.30866,0.25529,0.34367,0.16766,0.34416,0.25104,0.22519,0.27083,  
0.11198,0.10346,0.11947,0.10281,0.10309,0.11278,0.1201,0.12302,0.1273,  
0.10835,0.13649,0.096196,0.1352,0.11455,0.11757,0.10728,0.11809,0.1207  
1,0.10962,0.12011,0.11495,0.12744,0.11785,0.050601,0.054563,0.057418,0  
.062044,0.058402,0.061669,0.18647,0.27398,0.202,0.21262,0.2411,0.06179  
3,0.072416,0.12436,0.11936,0.1222,0.11102,0.12362,0.12437,0.10401,0.10  
954,0.10562,0.1247,0.10505,0.12579,0.12208,0.11709,0.10659,0.11405,0.1  
2033,0.12221,0.11077,0.10629,0.11852,0.058581,0.057223,0.065431,0.0601  
13,0.05376,0.056652,0.064311,0.05641,0.060216,0.059118,0.27196,0.28281  
,0.059638,0.056769,0.05773,0.055846,0.12092,0.11058,0.11164,0.12316,0.  
1184,0.11535,0.10207,0.12614,0.1202,0.1153,0.12575,0.11277,0.1151,0.11  
794,0.11772,0.11387,0.1119,0.10916,0.10603,0.061168,0.068531,0.067516,  
0.064715,0.056985,0.058707,0.059632,0.055547,0.059965,0.051984,0.06286  
,0.060261,0.055974,0.054524,0.065274,0.059054,0.053084,0.11963,0.10746  
,0.11852,0.10545,0.11309,0.10564,0.10763,0.11108,0.11345,0.13015,0.118  
33,0.10996,0.12166,0.1133,0.117,0.11478,0.059948,0.053578,0.052932,0.0  
56939,0.061864,0.055969,0.060056,0.067405,0.058519,0.053591,0.053741,0  
.064111,0.061819,0.052899,0.060272,0.05828,0.065413,0.063556,0.062346,  
0.12314,0.11479,0.13233,0.11797,0.11382,0.11571,0.11562,0.10912,0.1112  
5,0.10663,0.11486,0.12464,0.11397,0.057512,0.051514,0.058808,0.061382,  
0.061544,0.057714,0.064631,0.063631,0.061562,0.064155,0.065555,0.06464  
2,0.062447,0.059243,0.058705,0.057384,0.065496,0.062427,0.052999,0.059  
777,0.052679,0.11453,0.13002,0.11245,0.10385,0.11795,0.12624,0.12236,0  
.11109,0.10146,0.054438,0.061207,0.061174,0.061483,0.057041,0.061978,0  
.060502,0.063402,0.055847,0.056641,0.063561,0.059867,0.062348,0.060504  
,0.061187,0.057288,0.057292,0.058804,0.061394,0.057662,0.060864,0.0542  
2,0.065162,0.058451,0.058791,0.1108,0.12016,0.10082,0.12414,0.059684,0  
.051407,0.060684,0.058872,0.059989,0.055413,0.060554,0.064915,0.062092  
,0.056698,0.050808,0.058964,0.055076,0.060192,0.057833,0.060962,0.0579  
14,0.060199,0.066511,0.059634,0.060495,0.057819,0.058053,0.060055,0.05  
6567,0.060394,0.057428,0.053016,0.055318,0.055217,0.057102,0.05615,0.0  
59575,0.059359,0.060977,0.063234,0.054675,0.054247,0.058592,0.061748,0  
.062261,0.053653,0.059596,0.057435,0.062775,0.064017,0.072861,0.064291  
,0.055572,0.060317,0.058116,0.052722,0.064184,0.05698,0.059506,0.05781  
3,0.065339,0.053707,0.059184,0.057159,0.059378,0.065998,0.057054,0.064  
239,0.054389,0.059796,0.052586,0.055902,0.059607,0.057931,0.05169,0.05  
5067,0.055257,0.062525,0.055298,0.067358,0.053992,0.05882,0.060648,0.0  
52415,0.054193,0.051327,0.066007,0.058528,0.065536,0.05687,0.062925,0.  
049481,0.066382,0.068785,0.05987,0.050422,0.05467,0.052601,0.059508,0  
.063934,0.060096,0.056671,0.049534,0.053956,0.065203,0.063456,0.051594  
,0.057158,0.062276,0.057946,0.049516,0.062653,0.056628,0.059554,0.0595  
3,0.05632,0.059365,0.058027,0.058892,0.063048,0.050916,0.056903,0.0642

44,0.058498,0.062556,0.054035,0.064566,0.061973,0.06037,0.056368,0.055  
231,0.063306,0.058794,0.066425,0.060206,0.056343,0.058978,0.056613,0.0  
55425,0.058464,0.059139,0.061823,0.060515,0.057125,0.054611,0.055076,0  
.061022,0.055749,0.059627,0.055277,0.05878,0.049908,0.0582,0.053916,0.  
060233,0.057601,0.058158,0.062169,0.066659,0.055922,0.063675,0.058572,  
0.057248,0.059328,0.05994,0.047486,0.059751,0.065991,0.059672,0.063917  
,0.062997,0.063568,0.056796,0.062056,0.059261,0.06069,0.062183,0.05643  
4,0.054377,0.059238,0.057366,0.05804,0.061516,0.058591,0.055026,0.0611  
69,0.058216,0.059812,0.062002,0.05587,0.057569,0.056861,0.054692,0.060  
104,0.053604,0.05612,0.057183,0.058943,0.065311  
0.14912,0.15656,0.15335,0.14766,0.16976,0.15892,0.15769,0.14994,0.1546  
7,0.15305,0.15241,0.1706,0.15662,0.16042,0.15218,0.16248,0.16227,0.167  
55,0.15957,0.15188,0.29791,0.27958,0.29484,0.24412,0.1574,0.15395,0.15  
441,0.15864,0.15302,0.16196,0.15246,0.15711,0.16134,0.15863,0.15637,0.  
16147,0.16649,0.16301,0.15731,0.41848,0.31618,0.29897,0.30805,0.30934,  
0.27499,0.29103,0.15483,0.16275,0.15543,0.14837,0.15233,0.14983,0.1474  
5,0.15635,0.15581,0.15345,0.169,0.158,0.16288,0.15169,0.15667,0.46817,  
0.37087,0.26656,0.28749,0.26201,0.32808,0.26651,0.26561,0.32057,0.3225  
9,0.15229,0.15446,0.1485,0.16157,0.16366,0.15876,0.16219,0.15509,0.168  
32,0.15496,0.16508,0.16079,0.1534,0.15836,0.16906,0.45223,0.37248,0.43  
352,0.25017,0.31875,0.293,0.32422,0.27761,0.241,0.24791,0.28027,0.2875  
6,0.1511,0.16216,0.16043,0.15739,0.15457,0.15526,0.15812,0.15432,0.161  
23,0.15302,0.16669,0.15647,0.1626,0.15901,0.16169,0.15652,0.41008,0.31  
518,0.3302,0.29855,0.28854,0.24576,0.2846,0.29146,0.27822,0.30167,0.28  
38,0.33341,0.30682,0.29831,0.15875,0.15389,0.15995,0.15506,0.16006,0.1  
5856,0.15961,0.15739,0.15108,0.14973,0.16155,0.1574,0.15801,0.15405,0.  
15672,0.15124,0.40312,0.41806,0.45691,0.37431,0.45839,0.37662,0.27527,  
0.34057,0.34629,0.32963,0.29064,0.32565,0.295,0.38801,0.30272,0.24807,  
0.16719,0.1634,0.15672,0.16008,0.14894,0.16263,0.15921,0.15286,0.1587,  
0.15904,0.16105,0.16408,0.14801,0.16629,0.15893,0.16293,0.15268,0.4286  
2,0.37786,0.3146,0.37012,0.45134,0.35314,0.29048,0.26104,0.25506,0.257  
89,0.34956,0.26138,0.25646,0.26756,0.27753,0.29204,0.2523,0.15743,0.15  
817,0.15204,0.15976,0.16305,0.15189,0.14962,0.16265,0.14941,0.15249,0.  
16364,0.16346,0.15908,0.10355,0.1052,0.12194,0.15381,0.34841,0.39884,0  
.47144,0.44534,0.34859,0.37868,0.43527,0.26767,0.32015,0.2255,0.25825,  
0.25613,0.24269,0.34021,0.28905,0.27746,0.24952,0.27698,0.15157,0.1611  
8,0.15076,0.15701,0.16752,0.15407,0.15367,0.1555,0.15861,0.15555,0.161  
06,0.11452,0.10963,0.098022,0.10323,0.097386,0.10366,0.15598,0.4084,0.  
3363,0.41357,0.39179,0.3978,0.38548,0.46349,0.29164,0.26044,0.24117,0.  
33311,0.26103,0.27465,0.34411,0.28256,0.32015,0.29064,0.29718,0.16592,  
0.15574,0.16377,0.15852,0.15921,0.16046,0.15215,0.14916,0.15881,0.1033  
5,0.11964,0.10418,0.11161,0.10817,0.13653,0.10213,0.10608,0.11044,0.16  
27,0.47176,0.35718,0.34963,0.3698,0.50675,0.42984,0.33952,0.24068,0.23  
372,0.30859,0.22243,0.23018,0.26918,0.23445,0.29722,0.24223,0.27288,0.  
24308,0.32264,0.16153,0.15234,0.15082,0.15629,0.16671,0.15722,0.12412,  
0.10815,0.10758,0.10173,0.10413,0.10198,0.1138,0.10682,0.11379,0.10995  
,0.080526,0.098415,0.35487,0.3688,0.41881,0.48283,0.36043,0.40053,0.49  
596,0.24882,0.31381,0.32995,0.26675,0.41441,0.27747,0.29369,0.24067,0.  
28563,0.24409,0.31445,0.28363,0.15967,0.16139,0.15351,0.089529,0.10032  
,0.094406,0.1111,0.095861,0.10817,0.093312,0.10332,0.099245,0.1246,0.0  
97451,0.10005,0.10545,0.10177,0.10332,0.36789,0.33442,0.47632,0.36299,  
0.44795,0.40106,0.41263,0.42003,0.44564,0.27927,0.29049,0.2521,0.30068

,0.32424,0.32731,0.31317,0.27859,0.25553,0.29552,0.29431,0.10418,0.10384,0.11753,0.10426,0.10039,0.10657,0.10703,0.1077,0.11744,0.10365,0.099851,0.10226,0.10213,0.099259,0.11099,0.11934,0.10396,0.11095,0.35979,0.41627,0.32949,0.39044,0.34764,0.50369,0.39857,0.51448,0.44132,0.30258,0.28895,0.23428,0.17419,0.228,0.14475,0.21715,0.16729,0.22804,0.217,0.21218,0.11107,0.10684,0.1068,0.092392,0.087326,0.10016,0.11623,0.08948,0.10499,0.11148,0.099697,0.11015,0.10414,0.10839,0.1021,0.10096,0.089994,0.10837,0.38858,0.42896,0.35355,0.4433,0.42827,0.40527,0.39082,0.32687,0.3899,0.19078,0.2327,0.17275,0.2098,0.14678,0.18418,0.20777,0.22754,0.19258,0.23881,0.17984,0.11315,0.096049,0.10717,0.10788,0.10741,0.10059,0.10854,0.09822,0.093124,0.10723,0.10283,0.10017,0.10798,0.11118,0.11676,0.09942,0.10773,0.10124,0.36799,0.37092,0.36009,0.41482,0.52218,0.33364,0.36522,0.23244,0.2287,0.23956,0.19719,0.18067,0.21532,0.22166,0.21416,0.21806,0.21571,0.16048,0.18889,0.17806,0.10581,0.10953,0.10987,0.10804,0.11098,0.10592,0.098529,0.10815,0.10938,0.099991,0.10585,0.10985,0.10598,0.097255,0.10533,0.10707,0.1001,0.10386,0.39684,0.40642,0.38307,0.31747,0.43203,0.32785,0.19837,0.25175,0.2017,0.28068,0.25318,0.21534,0.19945,0.15429,0.16906,0.19836,0.19581,0.21107,0.24726,0.18526,0.11874,0.095201,0.088462,0.10363,0.10799,0.10733,0.11135,0.1218,0.11515,0.11564,0.10042,0.10499,0.098732,0.10643,0.09567,0.11177,0.10254,0.091407,0.36744,0.39755,0.41977,0.40318,0.29493,0.20887,0.20618,0.23965,0.17205,0.2004,0.24085,0.17597,0.18629,0.21393,0.18797,0.18179,0.19268,0.18482,0.23013,0.16677,0.11018,0.11308,0.10325,0.12128,0.10138,0.085002,0.10154,0.097581,0.11688,0.11534,0.09294,0.098038,0.10068,0.1096,0.11445,0.10626,0.10402,0.10719,0.41727,0.38131,0.39369,0.2301,0.15593,0.20698,0.25142,0.20075,0.1934,0.24152,0.27568,0.21995,0.20324,0.17271,0.2128,0.19943,0.22911,0.20944,0.21244,0.21092,0.095638,0.10974,0.10127,0.10442,0.10914,0.11595,0.10257,0.10959,0.11759,0.10257,0.10516,0.095171,0.10974,0.099456,0.085527,0.099263,0.10231,0.0989,0.3933,0.1927,0.23789,0.24348,0.27885,0.21459,0.2061,0.19839,0.29331,0.23925,0.20971,0.20449,0.19513,0.20986,0.17388,0.209,0.14324,0.16762,0.1956,0.10726,0.11358,0.11126,0.10611,0.099397,0.086537,0.1011,0.105,0.098393,0.11424,0.10791,0.11887,0.09686,0.1012,0.11491,0.10328,0.10587,0.049967,0.22262,0.26797,0.28264,0.24085,0.21951,0.20063,0.21018,0.18591,0.21521,0.26989,0.23479,0.20891,0.23094,0.1813,0.19398,0.18856,0.20976,0.19249,0.22949,0.11172,0.098329,0.090891,0.09943,0.11971,0.11157,0.099888,0.10701,0.11017,0.099417,0.099785,0.10059,0.10336,0.11069,0.096776,0.087658,0.11074,0.04714,0.20916,0.22474,0.20981,0.19697,0.22294,0.21668,0.26443,0.2276,0.25516,0.21513,0.17911,0.22442,0.19611,0.18712,0.18044,0.2048,0.24894,0.19868,0.10563,0.086636,0.10715,0.10112,0.10951,0.107,0.088247,0.09866,0.10838,0.10111,0.096918,0.12183,0.11558,0.11565,0.10282,0.11881,0.10234,0.10301,0.051053,0.30252,0.21835,0.17919,0.20277,0.22522,0.13432,0.22687,0.19893,0.15209,0.2426,0.19311,0.20347,0.19696,0.18757,0.19547,0.17736,0.18982,0.23103,0.10376,0.10803,0.10583,0.089834,0.10184,0.097567,0.106,0.11392,0.10369,0.10235,0.11072,0.10814,0.10626,0.10528,0.10577,0.10817,0.09954,0.054133,0.058241,0.050156,0.25926,0.25206,0.2849,0.2242,0.26274,0.2419,0.21463,0.22381,0.25548,0.18864,0.19975,0.20292,0.20613,0.25059,0.20708,0.10694,0.10607,0.11396,0.10452,0.096138,0.1026,0.10664,0.097313,0.11989,0.10516,0.10037,0.10271,0.10337,0.12082,0.10005,0.10478,0.10815,0.12049,0.057701,0.056774,0.056039,0.046452,0.25396,0.23149,0.22228,0.19657,0.26094,0.24271,0.25858,0.24882,0.21789,0.26444,0.24071,0.19333,0.10071,0.10382,0.10643,0



.098923,0.1153,0.091086,0.10124,0.1086,0.10637,0.10728,0.10114,0.1123,0.10774,0.1157,0.10443,0.12561,0.10064,0.11584,0.095421,0.097051,0.048876,0.053923,0.05871,0.059174,0.050398,0.053213,0.29633,0.22752,0.31002,0.16462,0.32391,0.26714,0.22562,0.25049,0.10601,0.097225,0.10906,0.092029,0.090679,0.1007,0.10971,0.11199,0.11768,0.10101,0.12384,0.083941,0.12521,0.10544,0.10853,0.10289,0.1097,0.11142,0.098906,0.10436,0.10485,0.11576,0.10927,0.041646,0.04715,0.050829,0.057524,0.049278,0.055142,0.16753,0.24538,0.19198,0.21727,0.23364,0.059568,0.064634,0.1169,0.1095,0.1118,0.10291,0.11212,0.1125,0.095153,0.099606,0.095473,0.113,0.094648,0.11651,0.11143,0.10649,0.099948,0.1026,0.10766,0.11671,0.10377,0.095899,0.10786,0.050151,0.05129,0.059594,0.052368,0.049472,0.05241,0.057694,0.051783,0.052788,0.050847,0.2387,0.25891,0.052612,0.050993,0.049388,0.050239,0.11227,0.10089,0.10362,0.11539,0.11014,0.10707,0.09154,0.11996,0.1106,0.10565,0.11478,0.106,0.10671,0.10727,0.10738,0.10371,0.10357,0.099338,0.097726,0.055889,0.05887,0.058479,0.06083,0.051584,0.053042,0.052752,0.051517,0.054193,0.046814,0.056897,0.054136,0.048357,0.049489,0.057574,0.055625,0.04886,0.10854,0.099129,0.11176,0.096988,0.10229,0.0974,0.098303,0.10409,0.10065,0.12081,0.10518,0.096168,0.11344,0.10794,0.10633,0.10687,0.048853,0.049027,0.048082,0.054317,0.058493,0.046477,0.056565,0.063128,0.050451,0.044485,0.046088,0.056437,0.05567,0.047082,0.054886,0.052312,0.057364,0.054921,0.054378,0.11341,0.10688,0.12215,0.10838,0.10585,0.10116,0.10511,0.10243,0.098211,0.099724,0.1093,0.11251,0.10202,0.051541,0.04653,0.053653,0.060502,0.056222,0.053777,0.055832,0.056207,0.054109,0.06058,0.059639,0.060126,0.054068,0.053362,0.054832,0.052497,0.056734,0.059316,0.04781,0.051392,0.048549,0.10265,0.12365,0.10491,0.096335,0.10656,0.11796,0.11654,0.10372,0.094728,0.047784,0.055357,0.053084,0.056388,0.052509,0.054872,0.054164,0.057393,0.052649,0.052243,0.054931,0.053269,0.057783,0.054708,0.054472,0.051596,0.052125,0.052104,0.056708,0.052198,0.049727,0.048573,0.058718,0.05041,0.053243,0.10255,0.10953,0.09038,0.11236,0.055645,0.048514,0.057472,0.052798,0.053297,0.051144,0.05275,0.059863,0.055675,0.050536,0.041341,0.053198,0.050449,0.053817,0.050837,0.055165,0.050912,0.052485,0.061402,0.054445,0.052394,0.050314,0.04996,0.053332,0.050597,0.055371,0.051409,0.049686,0.04794,0.04749,0.051547,0.048873,0.051779,0.052007,0.052501,0.056874,0.047371,0.045019,0.050702,0.055101,0.055348,0.047641,0.052867,0.05082,0.05655,0.056178,0.065816,0.058407,0.050147,0.049014,0.050432,0.04774,0.05855,0.049058,0.05239,0.048434,0.061806,0.048568,0.048879,0.049514,0.053163,0.058513,0.052773,0.057111,0.04868,0.053943,0.048908,0.050581,0.055854,0.052479,0.044179,0.049584,0.047687,0.057497,0.052542,0.062467,0.049344,0.054954,0.051344,0.049478,0.046993,0.048541,0.060373,0.053844,0.060583,0.054428,0.056549,0.043036,0.058536,0.062184,0.047136,0.046237,0.048268,0.046237,0.053108,0.056192,0.052582,0.048954,0.043324,0.046256,0.057357,0.056333,0.045009,0.054606,0.05471,0.054087,0.043523,0.056644,0.05032,0.052249,0.056002,0.051062,0.055966,0.051536,0.052738,0.057476,0.044613,0.048186,0.055243,0.051459,0.057864,0.048188,0.058992,0.055687,0.056909,0.052679,0.049702,0.05525,0.053708,0.058676,0.057046,0.050769,0.054299,0.048762,0.049519,0.053102,0.053122,0.053758,0.052702,0.050494,0.047011,0.049855,0.056099,0.051836,0.052305,0.046736,0.051803,0.045697,0.054283,0.049096,0.053038,0.052493,0.053735,0.054437,0.057458,0.04876,0.05742,0.052375,0.050147,0.054181,0.054375,0.043846,0.050363,0.061544,0.053584,0.058164,0.0553,0.055694,0.049494,0.053491,0.051698,0.053625,0.054703,0.049024,0.049657,0.0

52433,0.050413,0.053351,0.053236,0.052356,0.051956,0.052249,0.051948,0.054707,0.053817,0.050897,0.053055,0.050574,0.053055,0.053704,0.049093,0.050597,0.053188,0.05376,0.059995  
0.13427,0.14145,0.13952,0.13269,0.15898,0.14744,0.14752,0.1358,0.14327,0.14291,0.1395,0.1577,0.14223,0.14739,0.14118,0.15129,0.15117,0.15629,0.14538,0.14303,0.26557,0.24246,0.31641,0.20825,0.14888,0.13982,0.14313,0.15276,0.14077,0.15192,0.14626,0.14322,0.14806,0.14782,0.14609,0.15222,0.15262,0.14977,0.14579,0.43049,0.31397,0.29059,0.30719,0.27278,0.27095,0.27944,0.14534,0.14925,0.14374,0.14003,0.14355,0.1347,0.13998,0.14505,0.14408,0.14494,0.15695,0.14737,0.14769,0.143,0.14325,0.45121,0.39103,0.25778,0.26418,0.23881,0.31516,0.25543,0.26996,0.31725,0.30762,0.14101,0.14678,0.1374,0.15073,0.15365,0.14879,0.14655,0.14464,0.15106,0.14329,0.15464,0.15173,0.14362,0.14242,0.15688,0.4282,0.39904,0.40619,0.22634,0.30757,0.29276,0.33006,0.26827,0.2282,0.24402,0.27189,0.26754,0.14164,0.15423,0.1471,0.14673,0.14545,0.14639,0.1477,0.14411,0.15034,0.14428,0.15341,0.14399,0.15369,0.14887,0.14968,0.14191,0.37739,0.34184,0.31928,0.30082,0.26761,0.23511,0.26901,0.27006,0.23147,0.28831,0.27709,0.31802,0.29194,0.28795,0.14395,0.14555,0.14873,0.14344,0.14664,0.15073,0.14724,0.14536,0.14426,0.14061,0.14459,0.14707,0.14626,0.14188,0.14977,0.14043,0.39417,0.41379,0.40615,0.37325,0.43495,0.33005,0.27155,0.29838,0.30718,0.30283,0.25222,0.32793,0.29538,0.35759,0.30218,0.23523,0.15656,0.15438,0.14541,0.15048,0.13825,0.15083,0.14798,0.14208,0.14664,0.14226,0.14896,0.15377,0.13195,0.15009,0.149,0.15356,0.1424,0.40572,0.37802,0.33399,0.35764,0.42908,0.31611,0.26629,0.23909,0.2516,0.26537,0.33367,0.23748,0.22963,0.26146,0.25023,0.28139,0.23904,0.14683,0.14845,0.13849,0.14946,0.15223,0.14126,0.13838,0.15431,0.1398,0.14512,0.14989,0.15226,0.14654,0.094926,0.10121,0.11794,0.1421,0.34651,0.37589,0.47267,0.37238,0.31369,0.34906,0.36739,0.26097,0.29332,0.22491,0.25231,0.2437,0.22953,0.33748,0.27181,0.25633,0.23349,0.26958,0.14041,0.15057,0.13839,0.15005,0.15655,0.14578,0.14294,0.14086,0.14987,0.14203,0.15313,0.10661,0.10015,0.090819,0.092224,0.09028,0.09674,0.14211,0.38421,0.30971,0.39513,0.36735,0.39259,0.35165,0.44334,0.28845,0.24208,0.22515,0.32389,0.24819,0.26715,0.32109,0.25091,0.29658,0.2847,0.26262,0.15363,0.14289,0.14839,0.15232,0.14803,0.14823,0.14611,0.13704,0.147,0.096239,0.11088,0.096809,0.10502,0.097006,0.12887,0.098575,0.097522,0.097584,0.15177,0.45927,0.37181,0.34556,0.38898,0.46424,0.37037,0.32496,0.25099,0.23381,0.29428,0.22619,0.22246,0.25929,0.22312,0.28338,0.22734,0.25971,0.24593,0.31075,0.15477,0.14142,0.13984,0.1473,0.15568,0.14667,0.11556,0.095891,0.099291,0.094868,0.10045,0.094817,0.10458,0.097989,0.10234,0.099477,0.077775,0.091981,0.30349,0.31221,0.44843,0.48976,0.34286,0.37676,0.46088,0.24305,0.30498,0.32101,0.23389,0.4258,0.24088,0.28252,0.22369,0.26408,0.23793,0.29024,0.28654,0.14663,0.15271,0.14065,0.081436,0.093636,0.088083,0.10094,0.089562,0.10034,0.088545,0.094594,0.094398,0.11308,0.091375,0.09379,0.097373,0.093188,0.094762,0.37906,0.34704,0.3882,0.35461,0.46238,0.43377,0.39824,0.42105,0.45528,0.264,0.25392,0.25734,0.28645,0.32234,0.34303,0.29765,0.24688,0.24753,0.27487,0.28769,0.093088,0.09287,0.10531,0.096269,0.093508,0.09952,0.099768,0.10218,0.10999,0.095603,0.093464,0.096383,0.090198,0.091995,0.10334,0.10845,0.098478,0.10265,0.32741,0.36347,0.31654,0.3268,0.33804,0.47755,0.41779,0.4666,0.43753,0.30069,0.27366,0.22358,0.16439,0.20646,0.12377,0.21311,0.1598,0.1995,0.20406,0.18428,0.10251,0.097412,0.096561,0.081714,0.080637,0.090223,0.10617,0.086448,0.097617,0.10293,0.09325

8, 0.10092, 0.098606, 0.098095, 0.095189, 0.095744, 0.087516, 0.099797, 0.3383  
9, 0.40982, 0.35208, 0.41746, 0.39737, 0.35668, 0.39164, 0.33012, 0.32173, 0.17  
946, 0.22468, 0.16248, 0.21322, 0.14205, 0.15988, 0.2005, 0.21617, 0.18812, 0.2  
2816, 0.15718, 0.10461, 0.088933, 0.10059, 0.097114, 0.098383, 0.094543, 0.099  
369, 0.088228, 0.085049, 0.097369, 0.092229, 0.096384, 0.098268, 0.1048, 0.110  
06, 0.091709, 0.10497, 0.096684, 0.33166, 0.32205, 0.33477, 0.36699, 0.48423, 0  
.32726, 0.36082, 0.21822, 0.20343, 0.214, 0.17964, 0.18138, 0.20136, 0.2146, 0.  
21012, 0.21054, 0.21148, 0.13986, 0.18118, 0.16571, 0.10019, 0.10235, 0.106, 0.  
10233, 0.10324, 0.098828, 0.08963, 0.099848, 0.098202, 0.091909, 0.098617, 0.1  
0353, 0.099958, 0.092452, 0.097671, 0.097283, 0.092825, 0.095558, 0.37573, 0.3  
8621, 0.34559, 0.32799, 0.42759, 0.32503, 0.17915, 0.25026, 0.19448, 0.26155, 0  
.22525, 0.19986, 0.19688, 0.13964, 0.16049, 0.20216, 0.19496, 0.19621, 0.23214  
, 0.1862, 0.11067, 0.087363, 0.081774, 0.095739, 0.10302, 0.096451, 0.10453, 0.  
11081, 0.10722, 0.10599, 0.09128, 0.095417, 0.092449, 0.098044, 0.092641, 0.10  
415, 0.096898, 0.084507, 0.33095, 0.36835, 0.39892, 0.36623, 0.26009, 0.20151,  
0.19267, 0.24367, 0.15665, 0.18974, 0.21904, 0.16184, 0.18772, 0.19262, 0.1791  
9, 0.17209, 0.18906, 0.17263, 0.22682, 0.1579, 0.10395, 0.10383, 0.095692, 0.10  
883, 0.094433, 0.080574, 0.089959, 0.091731, 0.10698, 0.10652, 0.084755, 0.091  
66, 0.092277, 0.10387, 0.10362, 0.097396, 0.095331, 0.10104, 0.40077, 0.38734,  
0.41852, 0.22167, 0.13993, 0.18118, 0.22776, 0.17824, 0.19677, 0.2075, 0.28302  
, 0.21492, 0.19845, 0.16494, 0.21561, 0.1806, 0.22394, 0.18922, 0.20894, 0.2031  
5, 0.089182, 0.10034, 0.09149, 0.096993, 0.098336, 0.10967, 0.092199, 0.10273,  
0.10721, 0.092413, 0.099152, 0.089136, 0.098491, 0.089683, 0.078187, 0.092618  
, 0.093238, 0.093225, 0.35835, 0.17774, 0.23192, 0.21651, 0.26419, 0.19067, 0.1  
8937, 0.19539, 0.2823, 0.2093, 0.20869, 0.18896, 0.18075, 0.19681, 0.1653, 0.21  
568, 0.12987, 0.16468, 0.19171, 0.10292, 0.10522, 0.10014, 0.097815, 0.089175,  
0.079365, 0.093203, 0.096647, 0.088114, 0.10156, 0.099648, 0.10865, 0.094608,  
0.092356, 0.10586, 0.096947, 0.098169, 0.045802, 0.20909, 0.26477, 0.26437, 0.  
24572, 0.22417, 0.19224, 0.20331, 0.18629, 0.20058, 0.23864, 0.23844, 0.2125, 0  
.24316, 0.18742, 0.19236, 0.18369, 0.19234, 0.17152, 0.2253, 0.10195, 0.088377  
, 0.08308, 0.091273, 0.10806, 0.10239, 0.09208, 0.10222, 0.1018, 0.093487, 0.09  
5572, 0.093011, 0.094945, 0.10185, 0.090427, 0.080305, 0.10212, 0.041384, 0.18  
628, 0.21379, 0.19542, 0.19284, 0.19945, 0.22244, 0.25684, 0.22181, 0.23169, 0.  
2164, 0.1545, 0.21214, 0.19977, 0.17777, 0.16063, 0.17767, 0.2277, 0.18031, 0.0  
94742, 0.082108, 0.096374, 0.095019, 0.098246, 0.10187, 0.083909, 0.09412, 0.0  
99745, 0.093873, 0.087839, 0.1108, 0.10323, 0.1072, 0.093645, 0.11126, 0.09541  
6, 0.093357, 0.051416, 0.28566, 0.20395, 0.18694, 0.19569, 0.25147, 0.12206, 0.  
20968, 0.17584, 0.13986, 0.25555, 0.18549, 0.1964, 0.20758, 0.17624, 0.18603, 0  
.15928, 0.17626, 0.20339, 0.094172, 0.098364, 0.10073, 0.084099, 0.092785, 0.0  
89044, 0.10206, 0.10181, 0.095724, 0.096402, 0.10302, 0.098094, 0.099066, 0.09  
7026, 0.097342, 0.10263, 0.094211, 0.048852, 0.053039, 0.042803, 0.27922, 0.26  
236, 0.27709, 0.23755, 0.2493, 0.23003, 0.19498, 0.21288, 0.23335, 0.17926, 0.1  
9958, 0.18447, 0.20789, 0.22451, 0.19788, 0.10131, 0.098945, 0.10561, 0.095498  
, 0.089648, 0.093831, 0.10039, 0.085356, 0.11037, 0.099103, 0.096048, 0.095015  
, 0.094098, 0.11348, 0.092034, 0.10024, 0.10294, 0.11556, 0.055309, 0.051121, 0  
.054486, 0.04184, 0.24719, 0.22026, 0.20228, 0.1774, 0.24946, 0.2123, 0.24364,  
0.22749, 0.22205, 0.25301, 0.21389, 0.17767, 0.097478, 0.09569, 0.09495, 0.092  
607, 0.10256, 0.084544, 0.094786, 0.1013, 0.10096, 0.10231, 0.094058, 0.10236,  
0.10175, 0.10573, 0.1003, 0.11615, 0.092222, 0.10943, 0.085852, 0.093918, 0.04  
3622, 0.047686, 0.054051, 0.054114, 0.048549, 0.050816, 0.28529, 0.21704, 0.31  
013, 0.17042, 0.31742, 0.25247, 0.23754, 0.23341, 0.099765, 0.090578, 0.1021, 0  
.08652, 0.083036, 0.089785, 0.099839, 0.10507, 0.10757, 0.095009, 0.11596, 0.0

78633,0.11811,0.097477,0.10151,0.094987,0.098397,0.10232,0.092554,0.09  
8942,0.097647,0.10734,0.099319,0.04046,0.042754,0.046914,0.054521,0.04  
5189,0.051619,0.1862,0.22656,0.18683,0.23519,0.2385,0.052678,0.059263,  
0.10557,0.10625,0.10293,0.095155,0.10305,0.10543,0.088977,0.095635,0.0  
92319,0.10619,0.088074,0.10914,0.10523,0.097638,0.092796,0.094582,0.10  
132,0.10803,0.095354,0.090593,0.098036,0.044803,0.04731,0.055648,0.049  
528,0.042776,0.048693,0.051178,0.048494,0.048723,0.05033,0.22593,0.238  
8,0.048429,0.047695,0.047322,0.043107,0.10453,0.094544,0.095858,0.1104  
9,0.098118,0.097939,0.086045,0.10769,0.10832,0.099586,0.10844,0.10026,  
0.10087,0.098158,0.10292,0.097993,0.098139,0.088317,0.091437,0.052375,  
0.055,0.057166,0.058909,0.04301,0.049722,0.047399,0.044834,0.050286,0.  
040756,0.051724,0.050533,0.044266,0.045465,0.051148,0.050484,0.043155,  
0.10208,0.092603,0.10498,0.08696,0.093627,0.09124,0.094772,0.095414,0.  
094986,0.11268,0.097327,0.089819,0.104,0.10021,0.096628,0.096313,0.041  
392,0.042896,0.043173,0.051048,0.055317,0.045056,0.053786,0.056282,0.0  
41701,0.042465,0.043096,0.054399,0.051656,0.037984,0.047263,0.04864,0.  
053261,0.051317,0.050384,0.10796,0.0978,0.10964,0.10205,0.097689,0.092  
019,0.095622,0.094278,0.09154,0.092201,0.099674,0.10207,0.093365,0.048  
888,0.042438,0.046525,0.055743,0.051604,0.049529,0.047257,0.050143,0.0  
49824,0.055797,0.051429,0.055939,0.050103,0.050306,0.051598,0.046998,0  
.053125,0.052864,0.041686,0.047425,0.044975,0.095908,0.11091,0.097871,  
0.088866,0.09921,0.10781,0.11056,0.096925,0.08908,0.046295,0.049149,0.  
048643,0.050521,0.049385,0.049704,0.052384,0.049918,0.045691,0.047024,  
0.049839,0.049285,0.054789,0.05003,0.051494,0.049853,0.052191,0.050359  
,0.051632,0.047195,0.045197,0.043783,0.050437,0.045259,0.048853,0.0949  
,0.10236,0.08265,0.10423,0.049319,0.047167,0.055161,0.048267,0.051293,  
0.045087,0.045625,0.057249,0.052772,0.045205,0.035035,0.051126,0.04771  
7,0.051594,0.043745,0.049359,0.046887,0.04871,0.058328,0.050563,0.0479  
64,0.045576,0.047283,0.051701,0.04413,0.050564,0.048963,0.050124,0.042  
633,0.042203,0.045425,0.045783,0.045702,0.046669,0.046855,0.05453,0.04  
1935,0.040306,0.046449,0.050513,0.050955,0.045113,0.045824,0.044062,0.  
053298,0.04858,0.060054,0.054388,0.043462,0.047582,0.047488,0.044473,0  
.053653,0.045108,0.047016,0.046075,0.057371,0.043525,0.047419,0.047278  
,0.048207,0.054419,0.049965,0.050814,0.045091,0.050907,0.045359,0.0486  
47,0.048365,0.047254,0.04143,0.047324,0.043593,0.054383,0.051662,0.056  
331,0.045733,0.050332,0.045916,0.044098,0.040738,0.046674,0.057878,0.0  
51404,0.056548,0.049252,0.051312,0.038081,0.056191,0.053807,0.048531,0  
.038739,0.042956,0.04294,0.046604,0.054035,0.050098,0.044943,0.041087,  
0.044103,0.050258,0.049781,0.043037,0.049371,0.052836,0.048592,0.04081  
5,0.055379,0.048552,0.049275,0.055465,0.046113,0.050219,0.049698,0.047  
047,0.051378,0.040379,0.042803,0.050609,0.047164,0.051454,0.048533,0.0  
56144,0.050595,0.051448,0.050408,0.047309,0.049031,0.049377,0.054451,0  
.05157,0.047881,0.050289,0.041912,0.046363,0.051878,0.051225,0.04751,0  
.048855,0.049801,0.042492,0.044296,0.052782,0.04629,0.04914,0.039694,0  
.051262,0.039364,0.052839,0.045358,0.048752,0.045213,0.050351,0.04937,  
0.05404,0.045745,0.0535,0.048033,0.044657,0.049495,0.046244,0.040202,0  
.043021,0.05739,0.048779,0.056141,0.053759,0.05103,0.044191,0.049303,0  
.047903,0.051726,0.048246,0.049404,0.04502,0.047648,0.045655,0.049892,  
0.046911,0.049377,0.046291,0.047899,0.046337,0.047593,0.048973,0.05042  
8,0.051275,0.045977,0.046279,0.050778,0.044047,0.044875,0.052665,0.053  
213,0.053802

0.12243,0.13946,0.13332,0.12471,0.14823,0.13441,0.1386,0.13057,0.1372,  
0.13414,0.12842,0.14823,0.12997,0.13923,0.13397,0.14546,0.14003,0.1413  
8,0.14061,0.1361,0.25104,0.23327,0.29145,0.20576,0.13909,0.13519,0.132  
27,0.14656,0.13465,0.14164,0.13465,0.13085,0.13702,0.13778,0.1364,0.14  
384,0.14186,0.14042,0.13701,0.38785,0.27585,0.28186,0.27439,0.26507,0.  
26096,0.28937,0.13631,0.13714,0.13601,0.13106,0.13503,0.12422,0.13367,  
0.1348,0.13176,0.12924,0.14499,0.13843,0.13605,0.13546,0.13446,0.41233  
,0.3285,0.24036,0.25668,0.23264,0.30077,0.24077,0.2531,0.30853,0.31755  
,0.13725,0.13847,0.12831,0.14054,0.14163,0.14365,0.13446,0.13142,0.143  
4,0.13503,0.14185,0.14718,0.13603,0.13203,0.14857,0.41108,0.36755,0.36  
846,0.19875,0.29524,0.30402,0.30126,0.23867,0.21509,0.23079,0.27275,0.  
22704,0.12954,0.14173,0.13545,0.13753,0.13413,0.13642,0.13865,0.12803,  
0.13786,0.13784,0.14471,0.12956,0.13851,0.13891,0.13902,0.13326,0.3645  
7,0.32188,0.33192,0.30083,0.28161,0.22039,0.25287,0.27319,0.23115,0.28  
397,0.24528,0.30014,0.29543,0.29111,0.13414,0.13783,0.13498,0.13344,0.  
14071,0.14285,0.13375,0.14048,0.14079,0.13625,0.13676,0.13502,0.13338,  
0.13145,0.14123,0.13071,0.40206,0.42508,0.40225,0.33403,0.39411,0.3112  
8,0.24309,0.25211,0.29917,0.29142,0.25741,0.3042,0.26524,0.33653,0.274  
65,0.2482,0.14309,0.14105,0.13759,0.13793,0.13136,0.14321,0.14013,0.13  
034,0.13844,0.13212,0.13935,0.14347,0.1186,0.14296,0.14286,0.13882,0.1  
3703,0.45269,0.34527,0.27309,0.34092,0.41406,0.28355,0.24643,0.24243,0.  
.24913,0.25347,0.31852,0.2404,0.22278,0.2571,0.23557,0.28668,0.2182,0.  
13988,0.14167,0.13008,0.13412,0.14401,0.13561,0.12816,0.14401,0.13292,  
0.13852,0.13641,0.14072,0.13897,0.090275,0.09178,0.11356,0.13514,0.327  
04,0.36734,0.46073,0.36784,0.30607,0.35022,0.3558,0.24571,0.29787,0.22  
049,0.22959,0.25242,0.21119,0.29015,0.27592,0.26136,0.22578,0.24766,0.  
13124,0.14426,0.12648,0.14195,0.14801,0.14069,0.13444,0.13053,0.14212,  
0.13432,0.14302,0.097798,0.093663,0.088967,0.084113,0.081265,0.090215,  
0.13543,0.35494,0.3325,0.32237,0.37517,0.40114,0.38249,0.43848,0.27891  
,0.23742,0.21057,0.3014,0.22528,0.25758,0.31345,0.21768,0.2848,0.2657,  
0.26295,0.14471,0.13435,0.14316,0.14409,0.13754,0.13795,0.13926,0.1312  
,0.1368,0.087905,0.099147,0.08837,0.098467,0.088933,0.12034,0.092402,0.  
.09041,0.088696,0.13985,0.41145,0.37295,0.35939,0.35542,0.41221,0.3529  
1,0.28206,0.25947,0.21559,0.28788,0.23048,0.21009,0.24811,0.21333,0.26  
613,0.22222,0.24596,0.24951,0.27759,0.14743,0.13255,0.12555,0.13763,0.  
1435,0.13415,0.10976,0.090639,0.093941,0.089702,0.091423,0.089348,0.09  
7873,0.094192,0.096644,0.094459,0.075254,0.086328,0.28921,0.31113,0.47  
742,0.43417,0.28182,0.38721,0.48573,0.22771,0.28436,0.30701,0.23788,0.  
41993,0.2259,0.27575,0.22435,0.25898,0.20256,0.27599,0.25495,0.13883,0.  
.13951,0.13499,0.078527,0.087164,0.080827,0.095502,0.085921,0.09467,0.  
079034,0.086888,0.08807,0.10632,0.086024,0.089168,0.089146,0.081694,0.  
089399,0.32727,0.36193,0.35931,0.35943,0.39103,0.41258,0.41889,0.45904  
,0.40946,0.23637,0.2426,0.2445,0.28617,0.32013,0.33275,0.27344,0.25334  
,0.24877,0.25108,0.29278,0.086212,0.08692,0.10098,0.089409,0.085458,0.  
097174,0.093076,0.096307,0.10284,0.090311,0.087185,0.091872,0.085117,0.  
.084869,0.099879,0.10584,0.093024,0.096991,0.32357,0.36833,0.32646,0.3  
3479,0.30244,0.45828,0.34631,0.49361,0.41876,0.28765,0.26701,0.20441,0.  
.14292,0.20504,0.1289,0.19026,0.15051,0.17188,0.20081,0.17853,0.09773,  
0.088073,0.090289,0.078763,0.074796,0.08307,0.098329,0.08362,0.093439,  
0.09769,0.08826,0.09504,0.093628,0.090589,0.09207,0.091072,0.083732,0.  
094001,0.31467,0.39969,0.3579,0.41972,0.38392,0.36172,0.40267,0.31202,  
0.33236,0.2035,0.22421,0.15382,0.20137,0.13123,0.14602,0.18829,0.22668

,0.20792,0.21495,0.14827,0.097864,0.085871,0.095584,0.092506,0.090019,  
0.088723,0.091035,0.083507,0.080633,0.092607,0.086987,0.086963,0.08749  
1,0.099961,0.10447,0.087532,0.097755,0.088199,0.2866,0.2932,0.33278,0.  
33839,0.50858,0.3188,0.35843,0.20495,0.17986,0.20083,0.19113,0.17839,0.  
.20108,0.20396,0.2023,0.21675,0.20601,0.14013,0.16655,0.1657,0.09427,0.  
.094772,0.10062,0.096527,0.099285,0.089922,0.085221,0.093798,0.092013,  
0.083282,0.095118,0.094525,0.092093,0.085167,0.090928,0.094426,0.08659  
,0.086153,0.37236,0.42866,0.36974,0.36542,0.40344,0.32732,0.16046,0.22  
161,0.18799,0.26818,0.2006,0.19804,0.1902,0.1345,0.16743,0.19398,0.184  
63,0.19351,0.21556,0.19183,0.10369,0.083061,0.076533,0.088377,0.091011  
,0.091394,0.09468,0.10046,0.10031,0.097807,0.086515,0.086381,0.085013,  
0.09067,0.084127,0.099239,0.087412,0.07724,0.31506,0.36681,0.38906,0.3  
5136,0.2363,0.19147,0.18698,0.22282,0.15627,0.18243,0.22045,0.14709,0.  
17145,0.18513,0.17964,0.17057,0.19776,0.14903,0.22669,0.15542,0.096569  
,0.094402,0.091911,0.10557,0.086799,0.074042,0.085353,0.081799,0.10365  
,0.09925,0.081467,0.087673,0.087099,0.096295,0.10004,0.090846,0.090527  
,0.093946,0.39247,0.35706,0.38611,0.21908,0.14496,0.19776,0.23521,0.17  
161,0.20364,0.19826,0.2538,0.20582,0.19532,0.16271,0.19311,0.17455,0.2  
1175,0.19172,0.20443,0.20974,0.083351,0.091233,0.086681,0.094793,0.091  
495,0.10454,0.087045,0.094966,0.10055,0.0879,0.094786,0.083133,0.09284  
6,0.080331,0.073849,0.087212,0.086582,0.085023,0.30956,0.17944,0.22683  
,0.21216,0.25764,0.17056,0.19083,0.18579,0.26413,0.2473,0.18886,0.2006  
2,0.16976,0.19426,0.15254,0.22038,0.12926,0.16253,0.19664,0.095354,0.0  
96083,0.093328,0.092995,0.082545,0.074889,0.089545,0.092203,0.083909,0.  
.096261,0.095388,0.10147,0.087595,0.087967,0.099331,0.087404,0.092332,  
0.044822,0.18411,0.22612,0.25757,0.25525,0.20814,0.18862,0.18627,0.174  
05,0.19437,0.24963,0.21939,0.20442,0.24104,0.18175,0.19712,0.18303,0.1  
8544,0.15859,0.21089,0.0974,0.084952,0.079641,0.087475,0.10017,0.09492  
6,0.08431,0.098134,0.090449,0.086166,0.089153,0.085525,0.085905,0.0969  
82,0.083445,0.074535,0.094976,0.040089,0.17134,0.2161,0.16515,0.19837,  
0.18806,0.22477,0.25139,0.2077,0.21808,0.19876,0.15,0.21083,0.19642,0.  
17322,0.16695,0.17061,0.2106,0.16249,0.088359,0.07661,0.092826,0.08899  
6,0.090695,0.095549,0.076991,0.084658,0.092398,0.087311,0.080436,0.103  
49,0.098389,0.09753,0.084898,0.10321,0.085767,0.0937,0.050953,0.27041,  
0.19353,0.19324,0.20973,0.21646,0.1068,0.2106,0.17047,0.13399,0.24823,  
0.18598,0.18632,0.20481,0.1835,0.18374,0.16818,0.17611,0.2017,0.086161  
,0.091989,0.096186,0.080364,0.088342,0.086255,0.095247,0.093034,0.0937  
07,0.089378,0.097866,0.093753,0.092987,0.091564,0.090951,0.094368,0.09  
0077,0.050163,0.046698,0.042267,0.28358,0.25975,0.25362,0.23303,0.2215  
6,0.23149,0.18956,0.19287,0.20973,0.17642,0.19939,0.18274,0.2144,0.217  
92,0.19928,0.091529,0.09336,0.097514,0.090929,0.084788,0.088035,0.0941  
39,0.077284,0.10176,0.094752,0.089088,0.085978,0.091976,0.10792,0.0840  
24,0.092687,0.098117,0.10267,0.05074,0.047861,0.054997,0.040434,0.2477  
5,0.18971,0.20014,0.1911,0.21392,0.23766,0.2425,0.2103,0.23278,0.23513  
,0.20397,0.16413,0.09052,0.090988,0.092442,0.085522,0.096386,0.078402,  
0.088081,0.097659,0.092764,0.093471,0.087034,0.099164,0.096064,0.09795  
4,0.095228,0.10639,0.088556,0.10121,0.080571,0.091119,0.040087,0.04283  
5,0.048374,0.052604,0.047939,0.045726,0.28869,0.20426,0.31253,0.17548,  
0.29289,0.28814,0.25334,0.22329,0.091848,0.085025,0.094454,0.080208,0.  
079202,0.085129,0.09569,0.096391,0.097482,0.08644,0.11169,0.072172,0.1  
1149,0.093067,0.096946,0.087712,0.091066,0.095317,0.086511,0.090901,0.  
094208,0.099214,0.0946,0.038245,0.041226,0.046656,0.050399,0.043226,0.

048642,0.17974,0.2309,0.18553,0.2092,0.24973,0.051279,0.054509,0.09482  
4,0.094926,0.094347,0.087559,0.096131,0.09849,0.084481,0.091547,0.0868  
5,0.099082,0.085128,0.10045,0.10324,0.092092,0.090581,0.09096,0.093925  
,0.10153,0.088443,0.083398,0.09489,0.04316,0.044377,0.052916,0.046199,  
0.040003,0.0468,0.050304,0.045339,0.047638,0.048291,0.22956,0.23219,0.  
044634,0.047798,0.045395,0.037372,0.095914,0.085463,0.091546,0.10103,0.  
.092628,0.091565,0.081249,0.10447,0.09855,0.094836,0.10103,0.090613,0.  
093039,0.094015,0.099819,0.092834,0.090138,0.088267,0.083188,0.048691,  
0.050815,0.05102,0.055663,0.040074,0.046457,0.044485,0.042828,0.049157  
,0.043119,0.049737,0.045841,0.042539,0.044442,0.051599,0.045984,0.0436  
09,0.095714,0.091095,0.098348,0.08367,0.086932,0.085223,0.089585,0.090  
528,0.089415,0.10345,0.089944,0.086625,0.094873,0.092331,0.091107,0.08  
8548,0.040136,0.04216,0.042509,0.048187,0.052308,0.041305,0.050084,0.0.  
52204,0.041589,0.040753,0.04113,0.053365,0.052078,0.036603,0.046177,0.  
046526,0.049657,0.045867,0.047079,0.098093,0.092508,0.10528,0.097602,0.  
.0909,0.088478,0.092165,0.086758,0.087141,0.087729,0.093219,0.098978,0.  
.089223,0.048343,0.036588,0.045566,0.052835,0.048401,0.048108,0.044948  
,0.047251,0.048347,0.049797,0.050209,0.05329,0.049476,0.049787,0.04795  
1,0.046071,0.052374,0.051121,0.039158,0.044074,0.041717,0.088932,0.103  
71,0.09034,0.083921,0.090246,0.10628,0.10403,0.088924,0.080653,0.04774  
9,0.047017,0.044823,0.049689,0.045293,0.046342,0.050868,0.046057,0.042  
695,0.045192,0.049921,0.045431,0.052147,0.045151,0.049456,0.049923,0.0  
49988,0.049436,0.044866,0.04531,0.041641,0.042489,0.048377,0.040427,0.  
046059,0.088709,0.094635,0.080129,0.10024,0.047936,0.046205,0.052241,0.  
.046519,0.048092,0.041387,0.040217,0.05495,0.049497,0.040657,0.032874,  
0.04899,0.043242,0.049972,0.040205,0.042345,0.04584,0.046257,0.053216,  
0.046394,0.045173,0.041703,0.046238,0.050381,0.039013,0.04712,0.045609  
,0.047117,0.042124,0.039232,0.046457,0.0443,0.044089,0.045882,0.04674,  
0.050289,0.040817,0.036947,0.042952,0.049805,0.047294,0.040994,0.04307  
1,0.043527,0.051518,0.046027,0.05456,0.053155,0.041437,0.04472,0.04438  
1,0.04153,0.05032,0.041757,0.043673,0.044382,0.053488,0.042667,0.04477  
5,0.042385,0.04246,0.05217,0.047835,0.046256,0.042988,0.04675,0.040705  
,0.044863,0.047651,0.044336,0.038788,0.043103,0.039989,0.051807,0.0514  
91,0.054273,0.042397,0.046704,0.044934,0.041949,0.035554,0.042639,0.05  
5278,0.04853,0.054485,0.044339,0.051511,0.035199,0.057042,0.051899,0.0  
46761,0.036815,0.039755,0.039502,0.045672,0.04879,0.049853,0.043018,0.  
041292,0.042711,0.045516,0.045072,0.037085,0.047817,0.051432,0.044806,  
0.038453,0.053527,0.043991,0.047999,0.048191,0.042991,0.048612,0.04643  
6,0.045856,0.049092,0.037205,0.040572,0.049509,0.044699,0.049322,0.042  
05,0.050883,0.048008,0.048803,0.049127,0.044514,0.045785,0.043451,0.04  
8724,0.046174,0.045036,0.046626,0.041714,0.043823,0.05284,0.047638,0.0  
45301,0.047751,0.04702,0.039326,0.039835,0.047312,0.044399,0.045581,0.  
036687,0.048881,0.032903,0.047047,0.042589,0.046537,0.04569,0.050818,0.  
.045869,0.049509,0.043712,0.050525,0.043532,0.041929,0.046587,0.045732  
,0.037479,0.040546,0.053271,0.045866,0.054621,0.051107,0.047313,0.0422  
34,0.04832,0.044073,0.048358,0.047531,0.047527,0.039989,0.043312,0.040  
478,0.046941,0.04146,0.045902,0.046103,0.044882,0.04531,0.044107,0.047  
956,0.04697,0.052424,0.044818,0.045106,0.048234,0.043781,0.044233,0.04  
8166,0.05008,0.048243  
0.1201,0.12747,0.13267,0.11658,0.13725,0.13108,0.13083,0.12061,0.12931  
,0.1324,0.1221,0.1402,0.12198,0.135,0.12295,0.13589,0.13102,0.13341,0.  
13401,0.12882,0.24276,0.23977,0.26495,0.20237,0.13487,0.12907,0.1273,0

.13667,0.12843,0.13681,0.12999,0.12364,0.13047,0.12904,0.12665,0.13525  
,0.13695,0.12871,0.12841,0.39996,0.27106,0.26175,0.26285,0.27982,0.255  
27,0.2685,0.13075,0.12949,0.12539,0.12161,0.12919,0.11464,0.12522,0.12  
729,0.13005,0.12336,0.13882,0.13276,0.12719,0.13126,0.12968,0.38864,0.  
33326,0.21466,0.25903,0.2355,0.29731,0.22449,0.25056,0.30915,0.29235,0  
.13381,0.12669,0.12005,0.13063,0.13702,0.13528,0.12609,0.12605,0.13802  
,0.1312,0.12969,0.13814,0.12922,0.12519,0.13816,0.43489,0.3575,0.36466  
,0.2148,0.27691,0.30111,0.30663,0.21876,0.19354,0.21513,0.24943,0.218,  
0.12159,0.13488,0.13073,0.13362,0.12529,0.12933,0.12874,0.12239,0.1338  
1,0.12946,0.13676,0.12622,0.12592,0.1289,0.13419,0.12661,0.36859,0.298  
77,0.34668,0.30256,0.26284,0.20248,0.2519,0.27124,0.21304,0.26897,0.24  
311,0.28698,0.30033,0.27186,0.1291,0.13119,0.12617,0.12328,0.13034,0.1  
3659,0.12839,0.13188,0.13305,0.12792,0.12978,0.13036,0.131,0.12595,0.1  
3249,0.12593,0.35708,0.43224,0.34216,0.32331,0.4021,0.35833,0.25584,0.  
24038,0.29937,0.29743,0.22077,0.2803,0.26268,0.33337,0.24987,0.22653,0  
.13374,0.13159,0.13162,0.12434,0.12135,0.13678,0.13173,0.12582,0.13068  
,0.12426,0.13171,0.13361,0.11049,0.1343,0.13459,0.12936,0.13003,0.4392  
3,0.32207,0.28207,0.3333,0.44075,0.33162,0.23478,0.25521,0.2342,0.2451  
1,0.29451,0.24387,0.21951,0.22862,0.23782,0.27966,0.21241,0.1372,0.133  
74,0.12549,0.12767,0.13425,0.12674,0.12312,0.13873,0.12453,0.12471,0.1  
2885,0.13266,0.13294,0.084438,0.089668,0.10306,0.12611,0.32148,0.37407  
,0.44026,0.35998,0.3177,0.36338,0.3464,0.25402,0.26965,0.23591,0.20322  
,0.23286,0.20491,0.27673,0.27828,0.2552,0.23269,0.23309,0.12683,0.1366  
4,0.12112,0.13382,0.14016,0.13553,0.12137,0.12293,0.13331,0.12764,0.13  
356,0.094978,0.088446,0.086831,0.079766,0.077857,0.091306,0.13037,0.35  
21,0.29478,0.29482,0.37322,0.40414,0.35247,0.41615,0.29844,0.24547,0.2  
0538,0.28916,0.22651,0.24416,0.28995,0.21347,0.29044,0.25078,0.24377,0  
.13582,0.12804,0.13556,0.14027,0.13109,0.12608,0.13273,0.1236,0.12988,  
0.082632,0.094765,0.08252,0.092574,0.081349,0.11006,0.092153,0.088562,  
0.082341,0.12846,0.34295,0.39144,0.36361,0.3285,0.36533,0.36856,0.3086  
9,0.21702,0.22088,0.299,0.22125,0.20643,0.23926,0.22098,0.24764,0.2255  
4,0.24625,0.25661,0.27786,0.13577,0.12655,0.12118,0.13173,0.13564,0.12  
409,0.10173,0.084478,0.093613,0.08466,0.086206,0.084214,0.091974,0.088  
637,0.094334,0.08829,0.07392,0.083784,0.31299,0.34749,0.42381,0.42877,  
0.28242,0.38123,0.4587,0.21074,0.28583,0.31947,0.19998,0.37855,0.23818  
,0.25614,0.2294,0.25005,0.20152,0.25464,0.2454,0.13321,0.1301,0.12429,  
0.076858,0.080577,0.076438,0.086739,0.077689,0.091168,0.070704,0.08396  
7,0.083576,0.099961,0.083058,0.085163,0.084415,0.074071,0.084429,0.352  
17,0.32848,0.33346,0.3453,0.43734,0.41697,0.40311,0.433,0.40327,0.2226  
3,0.24161,0.25142,0.27063,0.31799,0.30886,0.25972,0.2516,0.24742,0.224  
23,0.31496,0.078168,0.078571,0.093606,0.085876,0.082087,0.094199,0.091  
435,0.090864,0.096824,0.087624,0.080332,0.088187,0.080177,0.082557,0.0  
9592,0.10074,0.089315,0.090904,0.33967,0.37882,0.30753,0.31161,0.27788  
,0.45086,0.35593,0.51069,0.41391,0.26459,0.2557,0.19473,0.13699,0.2051  
3,0.12774,0.19241,0.14097,0.14023,0.195,0.17948,0.087106,0.083746,0.08  
5721,0.076924,0.073564,0.0741,0.09428,0.079656,0.08743,0.091961,0.0834  
59,0.089736,0.086992,0.08394,0.088958,0.083875,0.077375,0.086854,0.346  
41,0.39414,0.40469,0.39728,0.39921,0.36143,0.41258,0.33178,0.35303,0.2  
1994,0.22305,0.12811,0.19277,0.1366,0.14124,0.19077,0.20898,0.21226,0.  
204,0.14245,0.092984,0.082144,0.087852,0.088212,0.087017,0.08402,0.088  
079,0.082335,0.074635,0.090041,0.082795,0.082186,0.083614,0.094758,0.1  
008,0.083449,0.093214,0.082978,0.28116,0.29823,0.3264,0.33421,0.488,0.



30553,0.29452,0.20593,0.17537,0.21782,0.1937,0.17849,0.18375,0.18303,0.  
.18842,0.21452,0.1946,0.14431,0.16278,0.15267,0.088083,0.093224,0.0964  
34,0.090812,0.089765,0.08617,0.079386,0.087767,0.085933,0.08161,0.0893  
51,0.090989,0.085185,0.081541,0.083319,0.089794,0.081851,0.081036,0.38  
643,0.35226,0.36857,0.41331,0.37479,0.30777,0.17335,0.21692,0.18388,0.  
23094,0.21445,0.18641,0.16895,0.13449,0.1669,0.18485,0.19125,0.19637,0.  
.21064,0.1718,0.10148,0.080058,0.07333,0.081911,0.082421,0.0874,0.0918  
54,0.091739,0.092314,0.093874,0.086616,0.08002,0.084112,0.088603,0.076  
639,0.096323,0.081798,0.070769,0.304,0.34151,0.34224,0.33892,0.22853,0.  
.19577,0.1936,0.23581,0.16299,0.17976,0.21736,0.14797,0.17166,0.17872,  
0.17641,0.18267,0.18377,0.16769,0.20512,0.15331,0.087758,0.089547,0.08  
7627,0.09778,0.080948,0.068499,0.08523,0.075492,0.098679,0.09545,0.076  
399,0.084841,0.082416,0.090382,0.09631,0.084683,0.085178,0.086329,0.41  
348,0.31144,0.35651,0.20997,0.15759,0.22326,0.22061,0.15165,0.19984,0.  
1742,0.23385,0.19989,0.18365,0.16478,0.17534,0.16903,0.198,0.16374,0.2  
0451,0.20589,0.076315,0.088153,0.079242,0.089131,0.086798,0.09844,0.08  
0612,0.084025,0.09666,0.086291,0.089826,0.079584,0.090604,0.074988,0.0  
69259,0.082535,0.079768,0.081365,0.2762,0.14976,0.2152,0.19518,0.26665  
,0.15475,0.19115,0.17056,0.26537,0.22787,0.17746,0.2009,0.17455,0.1765  
2,0.13964,0.22493,0.14191,0.15336,0.18677,0.089715,0.093929,0.087754,0.  
.086185,0.076625,0.070712,0.08511,0.086851,0.08459,0.091967,0.091029,0.  
.093893,0.084074,0.083666,0.096602,0.080018,0.088922,0.044732,0.17976,  
0.21368,0.25255,0.23295,0.1961,0.198,0.18554,0.15818,0.18094,0.26603,0.  
.19573,0.20228,0.23606,0.17437,0.17004,0.17301,0.18114,0.17115,0.20612  
,0.090857,0.077832,0.076081,0.083156,0.094108,0.089927,0.080688,0.0925  
05,0.089264,0.081949,0.08458,0.081876,0.081944,0.092468,0.073199,0.070  
18,0.090303,0.039438,0.14714,0.21143,0.17086,0.20467,0.20971,0.20386,0.  
.2345,0.22091,0.20322,0.21863,0.14447,0.19174,0.19908,0.16531,0.16541,  
0.16037,0.1985,0.16946,0.082067,0.074139,0.086458,0.085902,0.084736,0.  
09103,0.075755,0.080126,0.086194,0.083289,0.079657,0.099059,0.092001,0.  
.092497,0.084008,0.096179,0.083741,0.090279,0.051248,0.25435,0.1655,0.  
19412,0.22516,0.20826,0.11424,0.18254,0.18645,0.12397,0.22976,0.17957,  
0.18766,0.19777,0.16334,0.17782,0.17775,0.16752,0.18167,0.084106,0.088  
397,0.090513,0.076218,0.084978,0.082422,0.086976,0.089563,0.092977,0.0  
84545,0.09264,0.088339,0.086973,0.083981,0.084714,0.08799,0.087143,0.0  
46818,0.043545,0.036874,0.28474,0.27335,0.23452,0.22378,0.20913,0.2329  
7,0.18509,0.18995,0.19716,0.18296,0.19063,0.16613,0.20528,0.20726,0.19  
431,0.085011,0.092177,0.097572,0.087406,0.081329,0.082443,0.086858,0.0  
76383,0.098335,0.091104,0.085161,0.082217,0.08952,0.10107,0.080023,0.0  
88511,0.091287,0.098916,0.049168,0.046238,0.048903,0.038588,0.22842,0.  
16838,0.21565,0.18898,0.22649,0.23358,0.23249,0.20003,0.22926,0.2258,0.  
.17386,0.15361,0.08702,0.086053,0.087115,0.079202,0.089754,0.075655,0.  
083265,0.092909,0.089207,0.08943,0.083537,0.09573,0.093167,0.093217,0.  
088069,0.10123,0.089225,0.096481,0.077502,0.090054,0.038895,0.041917,0.  
.043158,0.050368,0.044518,0.046123,0.27892,0.16356,0.28078,0.17963,0.2  
8608,0.28754,0.23447,0.19422,0.086179,0.079944,0.08792,0.080591,0.0729  
36,0.083636,0.088675,0.090485,0.092943,0.082433,0.10786,0.068365,0.107  
17,0.088397,0.092176,0.085308,0.084354,0.092561,0.082072,0.086028,0.08  
9667,0.094112,0.089285,0.03708,0.039954,0.042758,0.049959,0.040354,0.0  
46363,0.17003,0.22287,0.17318,0.19871,0.26209,0.049639,0.051422,0.0875  
59,0.088485,0.08922,0.082437,0.090621,0.093787,0.078289,0.085995,0.080  
171,0.095343,0.079283,0.093534,0.094618,0.08977,0.086393,0.08342,0.091

453,0.096478,0.083711,0.078206,0.088088,0.040502,0.042529,0.049497,0.042817,0.037668,0.046651,0.049813,0.042478,0.043343,0.046137,0.22934,0.22205,0.044005,0.046154,0.042089,0.036902,0.089734,0.082644,0.088517,0.094842,0.085639,0.083622,0.076279,0.099862,0.092524,0.087389,0.096435,0.087727,0.088563,0.087296,0.095518,0.087701,0.08247,0.081258,0.079413,0.044232,0.048545,0.049477,0.051104,0.042037,0.045351,0.04231,0.039621,0.046866,0.040649,0.050208,0.044195,0.03922,0.041937,0.050142,0.043967,0.043197,0.086885,0.085726,0.093526,0.078948,0.080438,0.0824,0.083537,0.084467,0.083225,0.096177,0.085339,0.079918,0.088679,0.086963,0.085837,0.085396,0.041507,0.042156,0.03546,0.046658,0.04966,0.039237,0.047028,0.047285,0.040273,0.043232,0.040837,0.052943,0.04946,0.036126,0.041015,0.044558,0.046706,0.043378,0.042033,0.095633,0.086922,0.10096,0.093613,0.091346,0.084514,0.083451,0.084691,0.086955,0.086468,0.08728,0.089057,0.085175,0.046148,0.0363,0.044439,0.0489,0.044885,0.044958,0.041499,0.045956,0.044463,0.045602,0.046647,0.050266,0.045945,0.045519,0.049391,0.044748,0.04898,0.048245,0.037945,0.041933,0.041464,0.081203,0.098832,0.085405,0.078561,0.08369,0.099584,0.097241,0.084031,0.074939,0.046918,0.044197,0.043493,0.048468,0.042071,0.045217,0.047921,0.043312,0.042857,0.040257,0.047171,0.044429,0.050958,0.043061,0.048002,0.046587,0.046134,0.046809,0.043083,0.044171,0.040366,0.043502,0.044132,0.040569,0.042632,0.084581,0.091137,0.079275,0.10048,0.042603,0.045933,0.050716,0.045303,0.045878,0.038472,0.037689,0.051682,0.04531,0.039662,0.032442,0.047127,0.04257,0.04575,0.039788,0.040259,0.0433,0.042396,0.052221,0.043936,0.042234,0.040208,0.044596,0.047686,0.039399,0.044932,0.043656,0.045411,0.041914,0.036776,0.043844,0.042595,0.043017,0.040559,0.04378,0.049119,0.041227,0.039726,0.0425,0.047745,0.042564,0.039345,0.040082,0.040658,0.049428,0.047286,0.053502,0.050605,0.039222,0.041065,0.043174,0.039483,0.048484,0.042307,0.042408,0.043121,0.051196,0.041284,0.044568,0.038458,0.03888,0.049541,0.044632,0.043519,0.041621,0.044053,0.039278,0.043176,0.043563,0.04662,0.037909,0.040758,0.039114,0.050461,0.049459,0.050553,0.041113,0.046483,0.041594,0.040577,0.036011,0.042139,0.053315,0.042886,0.053629,0.045441,0.049008,0.033619,0.054445,0.051371,0.047405,0.034897,0.037701,0.035768,0.041207,0.047453,0.04965,0.04499,0.039045,0.037811,0.045717,0.045253,0.035988,0.046419,0.048737,0.0396,0.034381,0.053384,0.043584,0.047032,0.04894,0.037929,0.046258,0.042961,0.045305,0.046014,0.039254,0.040084,0.04584,0.04266,0.043835,0.038003,0.048768,0.044512,0.043762,0.043265,0.041859,0.041942,0.041407,0.047041,0.04656,0.043951,0.046208,0.041868,0.04141,0.047582,0.045403,0.045625,0.044013,0.047595,0.038209,0.040059,0.04761,0.041652,0.045273,0.035517,0.044462,0.035162,0.048019,0.041581,0.048903,0.041333,0.046991,0.042519,0.047434,0.041435,0.050811,0.041485,0.037451,0.044195,0.044537,0.034517,0.037422,0.05022,0.042971,0.050869,0.050824,0.042842,0.037493,0.049032,0.044608,0.044682,0.04699,0.046188,0.037951,0.042977,0.036365,0.045537,0.039952,0.042855,0.044,0.042035,0.041955,0.044064,0.051075,0.046578,0.051449,0.044234,0.04269,0.048311,0.040884,0.040288,0.045375,0.045996,0.042946  
0.11644,0.12025,0.12816,0.11247,0.13006,0.12436,0.1254,0.1127,0.12615,0.12739,0.1096,0.13489,0.1176,0.12677,0.11542,0.12548,0.12645,0.12602,0.12233,0.12162,0.23072,0.24559,0.26897,0.18875,0.12783,0.11798,0.11838,0.12956,0.12205,0.13202,0.12816,0.11972,0.12343,0.12222,0.11752,0.13394,0.13234,0.12285,0.12236,0.36586,0.26146,0.26193,0.26443,0.28085,0.25332,0.27083,0.12501,0.1232,0.12343,0.11925,0.12424,0.10696,0.11457,0

.12059,0.12789,0.11855,0.13448,0.12591,0.12265,0.12558,0.12445,0.367,0  
.29784,0.19191,0.25777,0.19118,0.2629,0.22315,0.24448,0.2939,0.30545,0  
.12382,0.12031,0.11222,0.12401,0.13005,0.12575,0.11552,0.12151,0.13014  
,0.12395,0.12084,0.13317,0.12276,0.1194,0.12809,0.4174,0.37891,0.31652  
,0.22912,0.24644,0.27502,0.31502,0.21975,0.21001,0.21242,0.25633,0.237  
98,0.11841,0.12712,0.12557,0.12239,0.12062,0.11765,0.12389,0.1189,0.12  
414,0.12716,0.12812,0.11945,0.12084,0.12162,0.1315,0.11715,0.36096,0.2  
9008,0.35216,0.2964,0.25493,0.20002,0.25271,0.26717,0.22916,0.2617,0.2  
387,0.26272,0.29974,0.2597,0.12437,0.12391,0.11882,0.12207,0.12442,0.1  
2625,0.12109,0.12569,0.12709,0.12117,0.12335,0.1272,0.12994,0.11933,0.  
12775,0.11977,0.37572,0.43752,0.34321,0.38323,0.41988,0.35737,0.25814,  
0.21011,0.27357,0.27138,0.19394,0.27604,0.24585,0.32648,0.25056,0.2295  
5,0.13142,0.12339,0.12547,0.11871,0.11628,0.12912,0.12614,0.12265,0.12  
537,0.11839,0.12333,0.13162,0.10811,0.12854,0.13221,0.12715,0.12526,0.  
42449,0.35258,0.29835,0.34193,0.42518,0.37238,0.22883,0.24263,0.20447,  
0.2274,0.27415,0.24113,0.20931,0.21686,0.23733,0.27988,0.21677,0.12986  
,0.12324,0.11743,0.12387,0.12918,0.1202,0.12038,0.12897,0.12171,0.1198  
3,0.12093,0.12654,0.12587,0.082387,0.086936,0.099954,0.12435,0.33348,0  
.36852,0.42998,0.38101,0.2992,0.32585,0.29541,0.26392,0.27303,0.22731,  
0.20632,0.22879,0.21108,0.26106,0.27264,0.24398,0.21881,0.24322,0.1273  
7,0.12929,0.1142,0.1263,0.12993,0.12915,0.11628,0.11739,0.12545,0.1193  
3,0.12628,0.090284,0.085248,0.078117,0.072311,0.077965,0.087799,0.1220  
7,0.38561,0.3187,0.29597,0.35138,0.44424,0.37371,0.43082,0.31543,0.241  
12,0.21658,0.2661,0.23074,0.24565,0.28283,0.19862,0.27894,0.22914,0.22  
975,0.131,0.12405,0.12865,0.13287,0.11707,0.12149,0.12652,0.12466,0.12  
354,0.077385,0.086806,0.080305,0.088983,0.077248,0.10024,0.086896,0.08  
2222,0.078713,0.12376,0.36064,0.42118,0.33556,0.33837,0.37152,0.34665,  
0.34561,0.21448,0.20639,0.31364,0.21698,0.20311,0.23303,0.21779,0.2197  
1,0.22095,0.25276,0.22709,0.28565,0.12631,0.1197,0.11485,0.12425,0.128  
3,0.11695,0.09883,0.077853,0.090837,0.080465,0.085518,0.082299,0.08959  
,0.081088,0.091554,0.085256,0.071351,0.08207,0.29543,0.35583,0.40044,0  
.44559,0.31389,0.42476,0.44464,0.21991,0.27393,0.30852,0.18897,0.37335  
,0.246,0.23631,0.22348,0.2602,0.21327,0.24796,0.23724,0.13103,0.1229,0  
.12074,0.075268,0.078259,0.073094,0.083035,0.076806,0.085228,0.071056,  
0.080902,0.08087,0.093935,0.079893,0.082453,0.080118,0.071974,0.082528  
,0.39807,0.29183,0.34637,0.37614,0.42922,0.41621,0.41125,0.45264,0.392  
51,0.2079,0.25581,0.22751,0.29549,0.27573,0.32729,0.24939,0.23355,0.27  
568,0.22499,0.27977,0.073418,0.075022,0.086748,0.081793,0.079859,0.089  
932,0.088946,0.088537,0.089173,0.084703,0.074805,0.085633,0.078664,0.0  
75883,0.092776,0.099407,0.084646,0.086244,0.33039,0.38724,0.31896,0.30  
133,0.28348,0.41859,0.31059,0.53268,0.41774,0.24575,0.25855,0.20156,0.  
13909,0.2092,0.1383,0.188,0.14795,0.15799,0.19981,0.17901,0.084059,0.0  
78896,0.082067,0.077718,0.070054,0.072114,0.085459,0.076727,0.079229,0  
.089245,0.077406,0.088624,0.082799,0.082817,0.079671,0.077455,0.073119  
,0.08369,0.35866,0.43984,0.38289,0.34341,0.3975,0.32093,0.41878,0.3565  
,0.36451,0.22024,0.23067,0.12722,0.18864,0.13626,0.14198,0.18454,0.196  
44,0.21961,0.19221,0.13813,0.088734,0.076886,0.085463,0.087383,0.08308  
5,0.079407,0.085641,0.074242,0.07546,0.083706,0.078225,0.0815,0.080118  
,0.091372,0.095903,0.082177,0.088279,0.077438,0.31239,0.26915,0.33639,  
0.30017,0.4357,0.32646,0.26569,0.19973,0.1799,0.20303,0.18467,0.16854,  
0.2085,0.17553,0.19775,0.19943,0.19067,0.15775,0.17239,0.14582,0.08589  
1,0.08914,0.091137,0.084111,0.088081,0.083262,0.074584,0.086712,0.0846

69,0.080847,0.084203,0.087051,0.084913,0.079326,0.076377,0.089492,0.07  
7173,0.079263,0.40433,0.35255,0.38021,0.43649,0.36175,0.28043,0.17953,  
0.18963,0.17784,0.23991,0.21271,0.18247,0.1695,0.13786,0.16522,0.16463  
,0.18154,0.19081,0.2067,0.16556,0.096727,0.075935,0.070455,0.082674,0.  
079336,0.083775,0.087857,0.088376,0.086675,0.092976,0.081049,0.073375,  
0.083033,0.085307,0.069996,0.08974,0.078422,0.06793,0.30342,0.33253,0.  
29407,0.33268,0.24704,0.18557,0.21055,0.23009,0.17032,0.19025,0.22805,  
0.14568,0.16213,0.16809,0.16964,0.17827,0.1907,0.15892,0.19903,0.14435  
,0.083586,0.084177,0.083189,0.09148,0.077965,0.061414,0.077903,0.07004  
7,0.092979,0.092391,0.073709,0.08131,0.079548,0.083988,0.08966,0.08201  
,0.079193,0.080834,0.39563,0.33268,0.37607,0.19423,0.15191,0.23013,0.2  
1668,0.18082,0.19821,0.1639,0.22802,0.20304,0.18458,0.16964,0.15522,0.  
16923,0.20288,0.14766,0.19235,0.20553,0.070283,0.082901,0.077397,0.086  
342,0.082352,0.09154,0.076297,0.078859,0.096815,0.083294,0.086354,0.07  
9093,0.086632,0.073609,0.067707,0.081272,0.079036,0.077035,0.23314,0.1  
5848,0.2039,0.20561,0.25594,0.16862,0.19488,0.18024,0.26088,0.25283,0.  
18846,0.19511,0.17999,0.17298,0.12428,0.22437,0.15251,0.1529,0.17389,0  
.085655,0.092038,0.085913,0.078617,0.074908,0.066448,0.083715,0.082547  
,0.08152,0.087581,0.088546,0.087917,0.076001,0.081845,0.093542,0.07695  
9,0.087461,0.04627,0.1803,0.21236,0.22754,0.22673,0.20981,0.19528,0.17  
594,0.14764,0.20073,0.27796,0.1872,0.18121,0.23212,0.14888,0.1686,0.17  
706,0.16963,0.16449,0.22031,0.084374,0.074958,0.074758,0.081612,0.0867  
15,0.089747,0.075492,0.085214,0.081955,0.079547,0.079328,0.080475,0.08  
1795,0.087726,0.074275,0.06956,0.085064,0.035948,0.15245,0.19645,0.175  
68,0.19492,0.2249,0.20622,0.24677,0.2215,0.20968,0.20387,0.1497,0.1785  
1,0.20412,0.16408,0.15871,0.15459,0.20185,0.15953,0.078353,0.067744,0.  
08163,0.08282,0.080581,0.086677,0.074794,0.073874,0.080618,0.076748,0.  
073155,0.091583,0.086893,0.085562,0.081088,0.09021,0.079376,0.08641,0.  
052042,0.26644,0.15254,0.1833,0.22847,0.21941,0.11452,0.20153,0.18082,  
0.1197,0.23854,0.15552,0.18339,0.20163,0.16909,0.18207,0.17068,0.16843  
,0.16258,0.079335,0.085779,0.086113,0.075106,0.083738,0.081212,0.08524  
4,0.085321,0.089631,0.081984,0.08568,0.086708,0.081814,0.081561,0.0814  
78,0.084231,0.081562,0.047227,0.041478,0.03617,0.28185,0.25007,0.22806  
,0.21307,0.20654,0.22351,0.15449,0.15992,0.16254,0.18169,0.17402,0.154  
32,0.21681,0.19094,0.19267,0.083663,0.085808,0.08984,0.084771,0.076558  
,0.078935,0.084537,0.071759,0.093549,0.087071,0.08392,0.080307,0.08889  
5,0.09833,0.08141,0.087044,0.08786,0.092372,0.046279,0.044364,0.049362  
,0.036912,0.22307,0.1832,0.21224,0.16367,0.21563,0.21128,0.22426,0.211  
89,0.22373,0.21679,0.18534,0.14378,0.080159,0.082844,0.084939,0.076215  
,0.086777,0.07283,0.078562,0.088184,0.083799,0.084408,0.085012,0.08975  
1,0.091333,0.086146,0.085653,0.096053,0.084663,0.092593,0.071067,0.084  
118,0.035249,0.04194,0.043034,0.051092,0.042848,0.046005,0.27465,0.166  
4,0.27694,0.18111,0.2627,0.27717,0.22837,0.17997,0.08278,0.076687,0.08  
0226,0.080596,0.067062,0.082904,0.086195,0.084098,0.092548,0.080268,0.  
10519,0.06419,0.10822,0.083303,0.084691,0.078758,0.082044,0.09099,0.07  
9125,0.082438,0.083378,0.092505,0.0877,0.03486,0.037559,0.043281,0.048  
187,0.039295,0.047991,0.18906,0.23379,0.17401,0.19378,0.24845,0.047599  
,0.051307,0.083107,0.085903,0.084113,0.079268,0.090943,0.087468,0.0757  
15,0.08262,0.078923,0.090371,0.073876,0.090215,0.088357,0.083836,0.081  
916,0.077426,0.090648,0.094266,0.079391,0.075034,0.085342,0.04432,0.04  
4569,0.050363,0.041564,0.040409,0.044018,0.044922,0.040182,0.041737,0.  
044143,0.22288,0.23797,0.040325,0.042206,0.037843,0.03965,0.088348,0.0

80042,0.082462,0.089547,0.078301,0.080236,0.075742,0.091568,0.090045,0.083423,0.091534,0.081372,0.08378,0.083333,0.090847,0.081244,0.080107,0.080791,0.075517,0.043744,0.047612,0.048266,0.047173,0.039397,0.04141,0.040751,0.039874,0.046092,0.038291,0.049002,0.042344,0.037358,0.042536,0.050802,0.046737,0.040887,0.081827,0.079288,0.0908,0.074668,0.076352,0.074716,0.082948,0.079532,0.076824,0.092673,0.083212,0.077594,0.087236,0.083038,0.087655,0.080723,0.037163,0.041899,0.0324,0.043241,0.045415,0.040215,0.04426,0.045762,0.037785,0.039002,0.041613,0.051377,0.049171,0.03436,0.040344,0.041218,0.046623,0.04421,0.041112,0.092351,0.080127,0.099288,0.089576,0.087728,0.081684,0.080334,0.080386,0.079511,0.081372,0.084041,0.081631,0.07868,0.045516,0.03391,0.040476,0.046011,0.041087,0.04403,0.042351,0.04242,0.045695,0.042323,0.044266,0.047906,0.042756,0.045361,0.048782,0.043653,0.046696,0.044414,0.037241,0.040577,0.039406,0.075856,0.095827,0.081446,0.071906,0.075811,0.094799,0.091632,0.080797,0.072713,0.046603,0.044998,0.042377,0.049048,0.04446,0.04423,0.048049,0.042483,0.040327,0.035799,0.043484,0.042493,0.05057,0.041055,0.046658,0.046125,0.043513,0.045222,0.040449,0.044695,0.037577,0.04635,0.044476,0.042692,0.043598,0.080409,0.085868,0.073302,0.095439,0.039767,0.045603,0.052515,0.04389,0.042031,0.039373,0.039241,0.049392,0.042136,0.039793,0.034256,0.046717,0.045052,0.043094,0.039492,0.041086,0.043136,0.043913,0.049756,0.044875,0.04331,0.038468,0.044464,0.042842,0.037013,0.04351,0.042935,0.042288,0.039619,0.035232,0.041854,0.043598,0.043777,0.038795,0.040984,0.048692,0.038256,0.036981,0.039341,0.046127,0.039381,0.039779,0.039858,0.04131,0.048715,0.04672,0.05079,0.048487,0.038767,0.043974,0.041543,0.038952,0.046187,0.041753,0.045358,0.044193,0.047774,0.038508,0.042692,0.035631,0.038515,0.046838,0.044354,0.041604,0.040714,0.039621,0.036503,0.041789,0.042845,0.045746,0.03957,0.038289,0.038469,0.046702,0.049762,0.046851,0.040858,0.046052,0.039716,0.039599,0.033317,0.040508,0.049784,0.039577,0.051489,0.043511,0.047699,0.031431,0.051819,0.047754,0.045197,0.034063,0.037973,0.037797,0.040461,0.04486,0.048245,0.042132,0.038754,0.037591,0.042321,0.043489,0.036269,0.046597,0.043596,0.039035,0.035014,0.052247,0.039849,0.0486,0.048226,0.033995,0.041368,0.042931,0.046382,0.041779,0.041708,0.038524,0.042772,0.044558,0.044772,0.03366,0.045038,0.044497,0.042942,0.040738,0.04112,0.041819,0.039654,0.045863,0.046244,0.041543,0.044365,0.040152,0.04095,0.0445,0.042624,0.042739,0.040326,0.04666,0.035673,0.036381,0.047085,0.041025,0.044887,0.035815,0.043113,0.036932,0.045089,0.041782,0.049658,0.038431,0.044943,0.039726,0.045705,0.038073,0.049267,0.040905,0.037403,0.042585,0.040083,0.031998,0.036839,0.04894,0.039562,0.048443,0.046978,0.042551,0.037135,0.045391,0.046707,0.0447,0.04284,0.045576,0.037788,0.040624,0.037436,0.044715,0.036928,0.041945,0.044228,0.038501,0.042347,0.042595,0.043737,0.042127,0.049534,0.041322,0.0394,0.047306,0.038763,0.041675,0.04332,0.045556,0.040765

0.11195,0.11283,0.1249,0.10957,0.12332,0.11876,0.12379,0.10853,0.11971,0.12326,0.10187,0.12778,0.11009,0.12337,0.11286,0.11667,0.12158,0.12105,0.11889,0.12253,0.23392,0.24409,0.30324,0.18251,0.12407,0.11538,0.11451,0.12299,0.12053,0.12123,0.12595,0.11464,0.1208,0.11527,0.11196,0.12467,0.12696,0.11421,0.11478,0.35018,0.2762,0.25355,0.28163,0.28182,0.2484,0.2644,0.11984,0.11919,0.11975,0.11577,0.11873,0.1043,0.11219,0.11642,0.12549,0.11327,0.12721,0.12069,0.11777,0.1163,0.12073,0.3658,0.29858,0.20342,0.24868,0.20068,0.25234,0.24476,0.23906,0.25841,0.31685,0.11714,0.11372,0.10979,0.12087,0.12553,0.12118,0.10958,0.11669,0.1219

8, 0.11808, 0.11629, 0.12589, 0.11522, 0.11587, 0.12437, 0.41875, 0.407, 0.3090  
4, 0.24654, 0.21228, 0.24741, 0.30865, 0.18834, 0.19312, 0.19854, 0.26115, 0.23  
168, 0.11477, 0.12002, 0.11914, 0.11326, 0.11123, 0.11362, 0.12209, 0.11168, 0.  
11735, 0.11963, 0.12199, 0.11482, 0.11549, 0.11331, 0.1241, 0.11668, 0.36392, 0.  
.29845, 0.33128, 0.31448, 0.2565, 0.21496, 0.27699, 0.27782, 0.20109, 0.2616, 0.  
.21965, 0.24298, 0.27312, 0.23101, 0.11772, 0.11983, 0.11755, 0.12132, 0.11748  
, 0.11916, 0.11609, 0.12228, 0.12076, 0.11653, 0.12057, 0.12184, 0.12014, 0.114  
36, 0.11856, 0.11407, 0.36103, 0.42039, 0.37267, 0.37503, 0.43971, 0.34936, 0.2  
4796, 0.19088, 0.2784, 0.26959, 0.18762, 0.23337, 0.24805, 0.30514, 0.23954, 0.  
22369, 0.12635, 0.12245, 0.12402, 0.11269, 0.1095, 0.12378, 0.12169, 0.11744, 0.  
.11259, 0.11215, 0.11731, 0.12673, 0.10473, 0.1213, 0.12433, 0.11904, 0.1172, 0.  
.36598, 0.35051, 0.3026, 0.35857, 0.40358, 0.34367, 0.20168, 0.24726, 0.21299,  
0.20114, 0.27343, 0.24159, 0.19831, 0.21926, 0.21957, 0.29374, 0.21901, 0.1230  
9, 0.11685, 0.1127, 0.11973, 0.12182, 0.11365, 0.11671, 0.12565, 0.11415, 0.115  
37, 0.1156, 0.12437, 0.12059, 0.082037, 0.083198, 0.094283, 0.11439, 0.33606, 0.  
.35457, 0.39661, 0.39496, 0.31902, 0.32897, 0.32092, 0.26291, 0.25052, 0.23564  
, 0.20284, 0.23084, 0.1985, 0.25799, 0.25614, 0.2352, 0.2031, 0.23794, 0.12202,  
0.12362, 0.11324, 0.11946, 0.12487, 0.12264, 0.11066, 0.11815, 0.1191, 0.11534  
, 0.11418, 0.087805, 0.080513, 0.072449, 0.073782, 0.076007, 0.086336, 0.1187,  
0.33942, 0.33728, 0.33976, 0.36274, 0.44145, 0.37348, 0.43461, 0.30218, 0.2297  
2, 0.23377, 0.2626, 0.19911, 0.23171, 0.26909, 0.18313, 0.27908, 0.21941, 0.226  
47, 0.12125, 0.11488, 0.1248, 0.12485, 0.11271, 0.11556, 0.12348, 0.11574, 0.12  
05, 0.072783, 0.081504, 0.080399, 0.079341, 0.075574, 0.095501, 0.0824, 0.0781  
03, 0.078626, 0.11611, 0.33547, 0.40481, 0.29985, 0.33447, 0.35666, 0.36305, 0.  
32409, 0.20893, 0.20088, 0.29194, 0.22317, 0.19392, 0.22685, 0.20096, 0.22045,  
0.23589, 0.24047, 0.21262, 0.27767, 0.12051, 0.11301, 0.10783, 0.11744, 0.1215  
8, 0.11506, 0.090037, 0.075635, 0.090802, 0.079085, 0.081431, 0.079583, 0.0834  
65, 0.077963, 0.088497, 0.080162, 0.067493, 0.076452, 0.28198, 0.38153, 0.4429  
3, 0.43997, 0.33921, 0.43406, 0.44626, 0.20924, 0.25806, 0.29343, 0.18727, 0.34  
768, 0.24687, 0.21396, 0.23714, 0.22357, 0.20311, 0.24546, 0.25064, 0.1301, 0.1  
2088, 0.11585, 0.076704, 0.07302, 0.075386, 0.083067, 0.072017, 0.079701, 0.06  
6172, 0.079456, 0.07776, 0.093777, 0.076403, 0.080272, 0.076281, 0.067559, 0.0  
81258, 0.39621, 0.27205, 0.34185, 0.34855, 0.39524, 0.39692, 0.36377, 0.4627, 0.  
.40888, 0.21535, 0.2725, 0.23604, 0.27662, 0.25666, 0.29837, 0.24587, 0.22092,  
0.2724, 0.20287, 0.26334, 0.070753, 0.073995, 0.081252, 0.080033, 0.080056, 0.  
085193, 0.083218, 0.082283, 0.084214, 0.077945, 0.069298, 0.077687, 0.074302,  
0.071669, 0.087872, 0.096717, 0.07926, 0.079397, 0.33581, 0.46691, 0.31473, 0.  
29665, 0.25088, 0.38829, 0.33366, 0.52942, 0.41483, 0.23928, 0.26954, 0.19531,  
0.13084, 0.20662, 0.13199, 0.18148, 0.12791, 0.15114, 0.20426, 0.16504, 0.0826  
17, 0.078122, 0.078655, 0.076783, 0.067006, 0.069144, 0.085384, 0.073227, 0.08  
1, 0.082419, 0.075599, 0.083784, 0.080115, 0.079166, 0.076837, 0.078169, 0.069  
373, 0.07893, 0.38784, 0.41123, 0.46757, 0.35362, 0.38129, 0.28983, 0.46133, 0.  
39297, 0.33454, 0.22405, 0.22869, 0.11965, 0.18249, 0.133, 0.14294, 0.18455, 0.  
19314, 0.21166, 0.18742, 0.13548, 0.082974, 0.07199, 0.08666, 0.084172, 0.0771  
27, 0.075773, 0.081645, 0.072105, 0.070458, 0.080833, 0.079808, 0.079286, 0.07  
9182, 0.087164, 0.087805, 0.078306, 0.084811, 0.075119, 0.32516, 0.26947, 0.30  
793, 0.3645, 0.42863, 0.3324, 0.24535, 0.19461, 0.18084, 0.18935, 0.16971, 0.16  
57, 0.19777, 0.17419, 0.1826, 0.18891, 0.16332, 0.14957, 0.16264, 0.13997, 0.08  
2298, 0.083565, 0.091459, 0.082049, 0.083158, 0.081731, 0.070382, 0.083232, 0.  
0806, 0.078319, 0.077683, 0.080948, 0.081339, 0.078641, 0.075183, 0.088058, 0.  
073369, 0.071984, 0.42304, 0.3365, 0.39389, 0.4373, 0.35332, 0.28458, 0.17502,  
0.18663, 0.18554, 0.22158, 0.23269, 0.1802, 0.17278, 0.13484, 0.16372, 0.18002

,0.16419,0.17273,0.20422,0.15728,0.094534,0.074857,0.068086,0.080559,0.077533,0.079888,0.086061,0.088063,0.08456,0.087198,0.076706,0.071621,0.078365,0.08131,0.066716,0.083777,0.074936,0.066813,0.29826,0.30734,0.31548,0.36221,0.287,0.17069,0.20857,0.23693,0.16549,0.19709,0.21652,0.14387,0.16178,0.15146,0.16268,0.16848,0.20256,0.17191,0.17897,0.14773,0.079337,0.080405,0.083099,0.085499,0.076964,0.057729,0.072698,0.067183,0.088915,0.092415,0.067133,0.079776,0.080373,0.076727,0.092006,0.081304,0.077799,0.077005,0.37854,0.30496,0.38935,0.20424,0.15185,0.22773,0.20765,0.16674,0.19521,0.14347,0.24383,0.21211,0.18731,0.15341,0.12886,0.16936,0.18861,0.15449,0.18882,0.19583,0.06871,0.082022,0.07179,0.07984,0.078197,0.090124,0.072368,0.079044,0.095306,0.076886,0.081406,0.074209,0.081479,0.069581,0.06606,0.081106,0.078405,0.078224,0.25489,0.15882,0.20784,0.19347,0.25321,0.16354,0.16953,0.19467,0.26576,0.276,0.16777,0.18393,0.16111,0.17603,0.12201,0.22736,0.15461,0.15532,0.18919,0.083088,0.091018,0.083708,0.078226,0.071767,0.063448,0.081949,0.078395,0.08021,0.083429,0.087072,0.083824,0.076286,0.077552,0.089806,0.078697,0.086292,0.046227,0.1987,0.2117,0.21894,0.20027,0.19436,0.19052,0.18111,0.16118,0.18556,0.25971,0.17632,0.17622,0.22016,0.14138,0.15996,0.16324,0.17133,0.1521,0.21703,0.081399,0.075153,0.07368,0.080299,0.08136,0.088641,0.074308,0.083674,0.079731,0.075445,0.079913,0.078583,0.079718,0.089887,0.069732,0.069651,0.081273,0.036322,0.15475,0.20469,0.1904,0.18901,0.21135,0.19686,0.23285,0.21617,0.19817,0.19367,0.13862,0.18111,0.20147,0.1816,0.1629,0.13549,0.20388,0.1626,0.075722,0.066331,0.080799,0.077806,0.080446,0.081929,0.073371,0.07127,0.079798,0.075772,0.070154,0.088374,0.087284,0.086356,0.07955,0.084014,0.077888,0.081234,0.052045,0.2781,0.16813,0.18702,0.25455,0.23022,0.1067,0.20972,0.18239,0.11114,0.24451,0.15792,0.16612,0.19561,0.17272,0.17761,0.1627,0.17037,0.15466,0.076621,0.082152,0.084318,0.07174,0.079526,0.081122,0.08433,0.082706,0.085814,0.079191,0.082053,0.080346,0.079388,0.078797,0.079315,0.077225,0.078074,0.048115,0.041465,0.032823,0.28087,0.24568,0.21214,0.21824,0.20766,0.23,0.16471,0.16286,0.17454,0.18672,0.1631,0.16228,0.21733,0.16078,0.1907,0.082365,0.080942,0.086584,0.083047,0.076541,0.077972,0.079305,0.07385,0.090364,0.082111,0.078334,0.073293,0.08447,0.096928,0.079747,0.087639,0.084985,0.089431,0.046988,0.044422,0.04694,0.035113,0.23201,0.18695,0.20809,0.16718,0.21173,0.19607,0.20179,0.20159,0.21645,0.20287,0.19224,0.14566,0.079829,0.080605,0.082206,0.069413,0.080465,0.069478,0.075215,0.084178,0.07992,0.079656,0.084372,0.088896,0.086765,0.079432,0.083867,0.093733,0.080487,0.089933,0.066657,0.083379,0.035151,0.041946,0.041984,0.048187,0.039145,0.044459,0.25279,0.17279,0.26819,0.19931,0.26335,0.25779,0.23215,0.17594,0.079177,0.070591,0.0775,0.078968,0.067459,0.081098,0.08209,0.082446,0.091599,0.077681,0.10229,0.06298,0.10387,0.08083,0.082795,0.075741,0.07939,0.085282,0.07608,0.078771,0.078562,0.086149,0.082351,0.033164,0.036474,0.038249,0.045054,0.040626,0.046205,0.18988,0.22367,0.17214,0.17674,0.25014,0.045969,0.048442,0.081331,0.077819,0.078176,0.077214,0.086619,0.082729,0.075871,0.081742,0.074739,0.087867,0.075425,0.082129,0.08734,0.082226,0.079073,0.078012,0.090019,0.088128,0.077008,0.075093,0.082157,0.040365,0.043744,0.048973,0.042921,0.039032,0.041492,0.044558,0.040655,0.038481,0.042925,0.22741,0.24406,0.039626,0.039364,0.038565,0.041026,0.087071,0.076449,0.07669,0.081955,0.079282,0.076394,0.070203,0.089266,0.08298,0.079598,0.087728,0.079086,0.081125,0.078465,0.089162,0.077846,0.075588,0.07498,0.077749,0.043491,0.04839,0.048591,0.045445,0.041029,0.0409

19,0.038089,0.037154,0.044122,0.036636,0.047706,0.039861,0.036297,0.04  
1794,0.047335,0.045674,0.040326,0.079903,0.076541,0.087179,0.069887,0.  
073227,0.071645,0.08162,0.07831,0.07519,0.087868,0.080843,0.072745,0.0  
79646,0.083726,0.082443,0.077211,0.034413,0.038286,0.031866,0.043372,0  
.043181,0.038502,0.041351,0.040715,0.03939,0.039507,0.040082,0.049856,  
0.049166,0.034251,0.038961,0.040567,0.046438,0.04142,0.041424,0.091201  
,0.077217,0.097335,0.087311,0.081758,0.075984,0.078064,0.080059,0.0806  
99,0.077094,0.08164,0.078487,0.076529,0.0442,0.034763,0.041638,0.04567  
8,0.042375,0.040261,0.043167,0.042605,0.042744,0.037256,0.044553,0.048  
405,0.041955,0.044758,0.045341,0.04174,0.047179,0.041967,0.03373,0.038  
854,0.036811,0.074332,0.090256,0.080817,0.069411,0.071936,0.089682,0.0  
86091,0.080077,0.070447,0.044838,0.045275,0.039271,0.048508,0.042775,0  
.041378,0.047291,0.040546,0.038982,0.033311,0.045364,0.041267,0.047339  
,0.041692,0.044789,0.048125,0.043761,0.043524,0.040528,0.04582,0.03382  
3,0.043145,0.044087,0.041203,0.044756,0.076339,0.079958,0.072201,0.090  
62,0.038505,0.045047,0.053345,0.042934,0.038483,0.040829,0.036127,0.04  
5752,0.039138,0.037485,0.035966,0.04245,0.044377,0.042878,0.040313,0.0  
42371,0.041633,0.040419,0.046699,0.044747,0.042319,0.037999,0.045159,0  
.040441,0.035427,0.042601,0.042258,0.039873,0.0415,0.036627,0.041899,0  
.043335,0.042728,0.036521,0.040255,0.050357,0.037645,0.035936,0.040287  
,0.047696,0.038706,0.039025,0.040969,0.040432,0.045646,0.043081,0.0462  
53,0.046267,0.037664,0.04461,0.042319,0.036689,0.043028,0.040699,0.046  
494,0.045412,0.046139,0.038343,0.039145,0.035953,0.035734,0.045119,0.0  
4335,0.041272,0.039058,0.039521,0.037134,0.040471,0.040568,0.046636,0.  
038993,0.036579,0.035799,0.042499,0.046884,0.044058,0.042232,0.043105,  
0.038606,0.039461,0.034309,0.039746,0.046337,0.038017,0.047787,0.04351  
8,0.04623,0.03519,0.04866,0.046014,0.044993,0.033742,0.03858,0.036426,  
0.042966,0.043381,0.047914,0.045024,0.039229,0.035521,0.043943,0.04224  
4,0.034515,0.043763,0.0414,0.038021,0.03374,0.051899,0.037641,0.046109  
,0.044047,0.034032,0.04133,0.041626,0.043945,0.042594,0.040115,0.03652  
7,0.042735,0.045501,0.046095,0.033671,0.042276,0.042957,0.042011,0.039  
366,0.037023,0.041633,0.037893,0.04582,0.046725,0.040483,0.043748,0.03  
8991,0.040442,0.043439,0.04081,0.040265,0.039253,0.046592,0.031416,0.0  
35134,0.044313,0.038339,0.046097,0.036342,0.040334,0.035893,0.047229,0  
.04098,0.048766,0.035183,0.046243,0.038283,0.046693,0.038215,0.046455,  
0.035248,0.038088,0.042309,0.038587,0.033785,0.034557,0.044128,0.03761  
2,0.045323,0.044637,0.040951,0.036463,0.043935,0.045785,0.042775,0.041  
018,0.042668,0.033271,0.038759,0.0368,0.042271,0.037307,0.040952,0.042  
208,0.038889,0.043038,0.040536,0.044156,0.039591,0.046194,0.040634,0.0  
35954,0.046637,0.038207,0.042637,0.041062,0.041682,0.040958  
0.10724,0.11126,0.117,0.10595,0.11283,0.11649,0.12,0.10762,0.11869,0.1  
1273,0.098998,0.12397,0.10715,0.11969,0.10983,0.11258,0.11743,0.12043,  
0.11358,0.12005,0.21735,0.2361,0.31431,0.17865,0.11811,0.11334,0.1102,  
0.12079,0.11869,0.11458,0.12203,0.10954,0.1171,0.11264,0.10572,0.12046  
,0.11802,0.10928,0.11022,0.34263,0.27796,0.25509,0.26512,0.28985,0.256  
31,0.25698,0.11749,0.11365,0.11727,0.11006,0.11229,0.10176,0.10972,0.1  
1699,0.11568,0.11185,0.12301,0.11542,0.11795,0.10908,0.11823,0.40155,0  
.28563,0.23026,0.24543,0.21252,0.26301,0.24083,0.21677,0.26644,0.30563  
,0.11268,0.11185,0.1025,0.11568,0.12367,0.11368,0.10588,0.11395,0.1206  
8,0.11845,0.1134,0.11918,0.1125,0.11096,0.12203,0.37809,0.43084,0.3156  
,0.21897,0.22841,0.22042,0.29744,0.19427,0.20603,0.20053,0.24499,0.243  
9,0.11031,0.11531,0.11666,0.10326,0.10995,0.10591,0.11682,0.10912,0.11



241,0.11998,0.11808,0.1113,0.11055,0.1144,0.11936,0.11542,0.36854,0.30  
711,0.37935,0.3008,0.23199,0.21585,0.26393,0.25996,0.18642,0.25832,0.2  
4396,0.24981,0.2575,0.24481,0.11239,0.11325,0.11246,0.11581,0.11325,0.  
10921,0.11279,0.11507,0.1151,0.1104,0.1133,0.11623,0.11799,0.11141,0.1  
1754,0.11078,0.35581,0.40969,0.34793,0.36737,0.44198,0.36297,0.25139,0  
.20016,0.28096,0.26454,0.1919,0.22869,0.23739,0.33152,0.22516,0.21511,  
0.12138,0.11827,0.12116,0.11273,0.10638,0.11779,0.1175,0.11476,0.11216  
,0.10877,0.11715,0.11599,0.098749,0.11566,0.11734,0.11778,0.11227,0.39  
806,0.3791,0.33254,0.33699,0.37047,0.35727,0.21419,0.24463,0.21478,0.1  
9955,0.27108,0.23368,0.20529,0.24327,0.20279,0.30074,0.22219,0.11302,0  
.11097,0.10582,0.11156,0.11653,0.10819,0.1137,0.11967,0.106,0.11157,0.  
1107,0.12209,0.1137,0.077572,0.083827,0.089306,0.11115,0.28722,0.37282  
,0.36097,0.36655,0.31897,0.2998,0.34167,0.24417,0.25883,0.22709,0.2193  
6,0.21596,0.21454,0.24632,0.24236,0.23299,0.20206,0.22106,0.11665,0.11  
791,0.107,0.11398,0.12165,0.11838,0.11076,0.11638,0.11343,0.11031,0.11  
066,0.083854,0.079424,0.072141,0.070845,0.072391,0.083966,0.11768,0.32  
957,0.36376,0.3316,0.36345,0.40111,0.36748,0.39776,0.29989,0.20844,0.2  
3055,0.25387,0.20709,0.21762,0.26103,0.19092,0.28225,0.22521,0.23459,0  
.12125,0.11143,0.12591,0.11842,0.10867,0.111,0.11785,0.11176,0.11156,0  
.069094,0.080564,0.081135,0.077282,0.075562,0.089829,0.079418,0.074409  
,0.077272,0.11535,0.34439,0.39601,0.27727,0.33763,0.33808,0.40374,0.30  
343,0.21519,0.19192,0.29299,0.21591,0.19638,0.21994,0.18267,0.21613,0.  
23217,0.23643,0.20038,0.26081,0.11619,0.10807,0.10327,0.11382,0.11907,  
0.10941,0.088418,0.072781,0.086087,0.078813,0.079574,0.074827,0.081834  
,0.073385,0.087946,0.07684,0.067,0.07533,0.26841,0.38154,0.40692,0.415  
06,0.35953,0.41201,0.42552,0.18887,0.27587,0.2865,0.21254,0.33674,0.23  
864,0.22105,0.2346,0.21955,0.23208,0.23605,0.23612,0.12513,0.11619,0.1  
1545,0.076058,0.071494,0.073168,0.079578,0.068783,0.078052,0.067881,0.  
075508,0.075818,0.08993,0.071608,0.076003,0.0749,0.069517,0.079792,0.4  
1266,0.29955,0.32347,0.36484,0.39887,0.37263,0.36854,0.46093,0.41784,0  
.20212,0.262,0.23836,0.29098,0.24279,0.28098,0.24711,0.22192,0.27004,0  
.20493,0.2568,0.068667,0.073689,0.079348,0.07403,0.076001,0.081756,0.0  
79859,0.078008,0.080852,0.075309,0.067895,0.075057,0.07291,0.067327,0.  
085183,0.091798,0.077841,0.076275,0.36458,0.42405,0.35242,0.30366,0.30  
406,0.37711,0.32344,0.52358,0.4039,0.22459,0.26758,0.19828,0.14434,0.1  
9524,0.14242,0.17109,0.12758,0.15922,0.2184,0.15836,0.079954,0.078698,  
0.079062,0.073962,0.064314,0.069955,0.082268,0.07116,0.077967,0.07858,  
0.072774,0.082033,0.075192,0.079006,0.072033,0.076192,0.0669,0.078459,  
0.35318,0.4442,0.44313,0.38099,0.39685,0.32062,0.44677,0.3887,0.34102,  
0.22074,0.21199,0.1147,0.17662,0.14268,0.13911,0.18513,0.17646,0.22242  
,0.17254,0.12541,0.079238,0.069631,0.084845,0.081441,0.074707,0.07962,  
0.080771,0.067207,0.068384,0.076547,0.07954,0.076065,0.078435,0.087463  
,0.081047,0.074758,0.083001,0.075518,0.34227,0.30088,0.33798,0.35736,0  
.4312,0.33502,0.26448,0.19012,0.17376,0.18507,0.17486,0.1619,0.18507,0  
.17366,0.17965,0.19275,0.15928,0.13947,0.1751,0.13452,0.079177,0.07883  
8,0.090181,0.076196,0.079522,0.079613,0.071039,0.080857,0.082004,0.076  
586,0.072106,0.081798,0.080361,0.077544,0.074862,0.08446,0.071804,0.07  
005,0.4073,0.34509,0.38672,0.39629,0.35148,0.27817,0.16383,0.18143,0.1  
8208,0.23053,0.22575,0.1816,0.16837,0.13735,0.15788,0.18033,0.16484,0.  
18526,0.19912,0.16112,0.087751,0.073147,0.066191,0.078243,0.069545,0.0  
76381,0.07957,0.086834,0.081172,0.08827,0.074038,0.070662,0.072965,0.0  
75331,0.065255,0.082286,0.069572,0.066214,0.30652,0.32245,0.27704,0.38

405,0.30546,0.1682,0.19882,0.22742,0.1376,0.22413,0.22438,0.123,0.1500  
5,0.15926,0.15819,0.17663,0.21303,0.16868,0.17912,0.1454,0.079576,0.07  
9589,0.077411,0.082078,0.076272,0.058076,0.067706,0.066123,0.083532,0.  
086825,0.064495,0.084875,0.076371,0.073296,0.08878,0.079669,0.073178,0.  
.074267,0.38163,0.28803,0.40995,0.21717,0.15744,0.22503,0.18899,0.1541  
7,0.18364,0.16176,0.23246,0.21051,0.17378,0.15389,0.13668,0.16701,0.18  
757,0.14517,0.18265,0.18387,0.063654,0.075807,0.071433,0.077916,0.0735  
08,0.085061,0.069958,0.075237,0.091675,0.075742,0.080958,0.072406,0.07  
8655,0.066773,0.064996,0.077227,0.075878,0.076802,0.24737,0.16464,0.18  
204,0.19059,0.23865,0.19057,0.1743,0.19044,0.27113,0.25963,0.16541,0.1  
7896,0.15545,0.17424,0.12242,0.22158,0.15102,0.15381,0.19997,0.080098,  
0.089612,0.082984,0.076649,0.071014,0.063442,0.078474,0.075956,0.08030  
2,0.081416,0.084075,0.07884,0.071758,0.073885,0.085796,0.077492,0.0846  
71,0.045655,0.194,0.21601,0.19481,0.21672,0.19124,0.17264,0.1627,0.156  
96,0.18836,0.25641,0.16686,0.18128,0.20188,0.12365,0.168,0.15478,0.175  
6,0.14287,0.21391,0.077959,0.073144,0.070492,0.080304,0.080347,0.08354  
3,0.075409,0.081627,0.07784,0.071192,0.077554,0.07507,0.07633,0.086312  
,0.068803,0.066606,0.078339,0.034394,0.15226,0.20149,0.19804,0.19188,0.  
.21333,0.19403,0.21553,0.19807,0.19858,0.20537,0.14002,0.16689,0.21487  
,0.19099,0.17906,0.11771,0.17844,0.16282,0.073523,0.061308,0.07983,0.0  
77772,0.07914,0.082218,0.06859,0.07256,0.078172,0.074998,0.070759,0.08  
388,0.083718,0.083984,0.075201,0.08434,0.07296,0.076226,0.049107,0.301  
09,0.15699,0.19815,0.26432,0.21712,0.10936,0.20095,0.18674,0.10645,0.2  
3528,0.16308,0.16542,0.19699,0.16442,0.19193,0.16028,0.15818,0.13459,0.  
.073728,0.077011,0.084223,0.072828,0.078468,0.076976,0.080779,0.080485  
,0.083482,0.077552,0.079079,0.075812,0.078901,0.076694,0.073152,0.0759  
18,0.080812,0.046743,0.037582,0.03353,0.27214,0.21697,0.18188,0.22018,  
0.21458,0.22967,0.18058,0.15246,0.17738,0.17481,0.15983,0.14657,0.2030  
5,0.17355,0.19035,0.078964,0.075776,0.086046,0.077559,0.07832,0.072213  
,0.077632,0.071138,0.086393,0.079526,0.075388,0.06937,0.078179,0.09346  
3,0.079053,0.084369,0.082814,0.082896,0.046616,0.046725,0.044918,0.037  
36,0.2289,0.17968,0.2032,0.16482,0.19192,0.1905,0.19256,0.19873,0.2097  
9,0.1852,0.18373,0.12252,0.077465,0.078925,0.079817,0.068679,0.077998,  
0.067235,0.074279,0.0802,0.079468,0.077887,0.08315,0.087926,0.083914,0.  
.073738,0.078086,0.094125,0.079299,0.087312,0.064876,0.079867,0.033537  
,0.042442,0.039572,0.04485,0.039406,0.041168,0.22809,0.16834,0.25473,0.  
.21432,0.25726,0.26293,0.23918,0.17325,0.075003,0.072598,0.077186,0.07  
593,0.065876,0.078286,0.080729,0.078305,0.087215,0.074211,0.096666,0.0  
6077,0.098583,0.07653,0.080007,0.071683,0.078487,0.081074,0.073569,0.0  
77067,0.079328,0.083406,0.08182,0.034801,0.038139,0.036171,0.045488,0.  
039874,0.044242,0.1974,0.21765,0.17037,0.16766,0.2596,0.045519,0.04883  
7,0.077063,0.075481,0.078033,0.077087,0.083926,0.081558,0.072659,0.078  
514,0.06899,0.08534,0.074991,0.079875,0.082914,0.078414,0.075586,0.071  
239,0.09017,0.083892,0.07124,0.074874,0.07636,0.041329,0.04669,0.04781  
4,0.044926,0.038683,0.042257,0.044338,0.038262,0.037298,0.039372,0.223  
71,0.23133,0.040058,0.036979,0.040653,0.038914,0.083296,0.074547,0.075  
173,0.08085,0.079802,0.071252,0.067079,0.08625,0.079316,0.079462,0.087  
276,0.0782,0.073678,0.077394,0.088655,0.075582,0.077335,0.073183,0.071  
281,0.042078,0.046159,0.048927,0.04358,0.037781,0.040024,0.035559,0.03  
6959,0.043446,0.036939,0.046979,0.041612,0.038464,0.042379,0.044398,0.  
045343,0.039254,0.077668,0.070514,0.083145,0.06775,0.073632,0.072022,0.  
.077015,0.073495,0.074214,0.087082,0.080989,0.07022,0.07753,0.082061,0

.078253,0.075773,0.034577,0.038691,0.036325,0.041893,0.041072,0.040177  
,0.037311,0.040886,0.037362,0.0415,0.038517,0.048705,0.046401,0.035318  
,0.040694,0.038028,0.045262,0.04217,0.043068,0.090863,0.074289,0.09518  
5,0.085938,0.076651,0.074411,0.079674,0.078132,0.079724,0.073554,0.079  
802,0.07909,0.075217,0.041707,0.037016,0.045012,0.04597,0.041453,0.038  
557,0.039517,0.041266,0.041112,0.034766,0.044692,0.045765,0.040629,0.0  
42777,0.040867,0.040749,0.047515,0.041666,0.032034,0.039214,0.035685,0  
.074026,0.084202,0.074402,0.067106,0.070974,0.082181,0.082456,0.080701  
,0.072061,0.042247,0.043401,0.035073,0.045538,0.044075,0.042952,0.0453  
52,0.041624,0.03559,0.034003,0.043678,0.040316,0.046573,0.042179,0.044  
204,0.043842,0.045982,0.040031,0.037881,0.045174,0.035384,0.044509,0.0  
4545,0.040717,0.046625,0.077862,0.079783,0.067169,0.085074,0.039069,0.  
041844,0.052408,0.041181,0.039767,0.039471,0.037766,0.04255,0.040021,0  
.036654,0.032216,0.038982,0.043609,0.043021,0.042698,0.041774,0.040946  
,0.041831,0.046624,0.041231,0.03968,0.036816,0.04113,0.039564,0.035875  
,0.040944,0.0409,0.040542,0.038445,0.037927,0.043141,0.042693,0.04222,  
0.03551,0.040922,0.049067,0.037373,0.034793,0.040593,0.043984,0.036721  
,0.04008,0.039437,0.040103,0.046376,0.043634,0.044633,0.044456,0.04013  
5,0.043955,0.04078,0.036178,0.04225,0.040935,0.044401,0.044332,0.04880  
4,0.039079,0.038053,0.034165,0.034633,0.042702,0.041543,0.040982,0.039  
369,0.035334,0.036839,0.042065,0.038327,0.044931,0.039154,0.035053,0.0  
34059,0.042714,0.044962,0.043636,0.03882,0.042715,0.038989,0.038133,0.  
033797,0.039712,0.044771,0.03924,0.043408,0.041825,0.046555,0.035761,0  
.046095,0.043423,0.042706,0.033047,0.040866,0.03502,0.04361,0.042635,0  
.045172,0.044869,0.035312,0.03429,0.045469,0.044576,0.033984,0.042456,  
0.040046,0.038467,0.02963,0.052883,0.036912,0.046147,0.042118,0.031984  
,0.039556,0.04368,0.044366,0.041155,0.042029,0.03525,0.039239,0.047815  
,0.043622,0.033501,0.04089,0.046274,0.040064,0.039594,0.036407,0.03731  
1,0.034804,0.043735,0.045962,0.041202,0.044876,0.038837,0.039879,0.042  
502,0.038319,0.038158,0.041923,0.044687,0.031095,0.034305,0.043865,0.0  
38807,0.044829,0.034985,0.038421,0.036962,0.043778,0.043365,0.047235,0  
.035669,0.045098,0.03679,0.046353,0.039954,0.04644,0.036383,0.038114,0  
.039711,0.039198,0.036,0.036532,0.04236,0.035529,0.045071,0.046623,0.0  
41388,0.03535,0.041708,0.04096,0.042766,0.04104,0.043634,0.033928,0.03  
3562,0.037767,0.041376,0.036163,0.038682,0.040487,0.038328,0.041334,0.  
042391,0.040654,0.037755,0.046804,0.04149,0.03729,0.046483,0.036653,0.  
038964,0.03938,0.03767,0.037229  
0.10626,0.1083,0.11208,0.10245,0.11028,0.11269,0.11567,0.1023,0.11725,  
0.108,0.09382,0.11817,0.10344,0.11668,0.10905,0.11174,0.11349,0.11621,  
0.10726,0.11684,0.20777,0.22416,0.2926,0.20445,0.1117,0.10936,0.10654,  
0.1164,0.1127,0.11439,0.11437,0.10037,0.11606,0.10697,0.1055,0.11603,0  
.10902,0.10362,0.11002,0.33283,0.27075,0.25727,0.26537,0.28358,0.24202  
,0.22197,0.11186,0.11124,0.11536,0.1052,0.1074,0.098591,0.11126,0.1133  
,0.11159,0.10992,0.11664,0.11029,0.11344,0.10432,0.11582,0.38378,0.319  
07,0.24297,0.22267,0.21942,0.26429,0.26769,0.18781,0.22937,0.28687,0.1  
0914,0.10725,0.10121,0.11344,0.11706,0.11263,0.10285,0.11172,0.11602,0  
.11536,0.1112,0.11382,0.11003,0.10827,0.11534,0.3872,0.40719,0.36749,0  
.22986,0.19893,0.23088,0.28983,0.19576,0.18906,0.20399,0.23373,0.24896  
,0.106,0.10941,0.11502,0.10327,0.10356,0.10057,0.10897,0.10797,0.11134  
,0.11308,0.11265,0.10829,0.10602,0.11192,0.11338,0.1112,0.39329,0.2881  
2,0.37867,0.30391,0.2307,0.2008,0.27917,0.26012,0.1953,0.2456,0.22504,  
0.25154,0.25412,0.24628,0.11079,0.11188,0.11088,0.11208,0.11072,0.1059

4, 0.11189, 0.11557, 0.10698, 0.10917, 0.1034, 0.10807, 0.11757, 0.11387, 0.11601, 0.11134, 0.3771, 0.40033, 0.37045, 0.32721, 0.46723, 0.3255, 0.25464, 0.2299, 0.26989, 0.24544, 0.20303, 0.25528, 0.23731, 0.30073, 0.22251, 0.21592, 0.11886, 0.11158, 0.12094, 0.10742, 0.10164, 0.11139, 0.11227, 0.11227, 0.11129, 0.11175, 0.11665, 0.11184, 0.095446, 0.10808, 0.11531, 0.11555, 0.1076, 0.427, 0.3767, 0.31225, 0.35284, 0.36241, 0.32354, 0.23095, 0.23151, 0.19155, 0.19946, 0.26774, 0.21264, 0.20416, 0.25588, 0.19476, 0.29214, 0.21561, 0.11039, 0.10736, 0.10444, 0.11078, 0.10603, 0.10317, 0.11067, 0.11583, 0.10597, 0.10652, 0.10583, 0.11839, 0.11159, 0.074632, 0.080807, 0.088031, 0.10758, 0.26769, 0.37345, 0.35157, 0.34517, 0.31978, 0.29444, 0.37205, 0.26504, 0.2688, 0.20632, 0.19733, 0.21719, 0.20643, 0.24442, 0.2501, 0.24513, 0.19807, 0.20691, 0.10989, 0.11492, 0.10524, 0.11309, 0.11596, 0.11476, 0.10494, 0.10944, 0.10708, 0.10728, 0.11135, 0.079514, 0.07329, 0.070636, 0.069678, 0.071445, 0.081625, 0.11509, 0.38191, 0.3716, 0.32202, 0.3737, 0.42377, 0.3535, 0.35996, 0.31914, 0.20301, 0.24009, 0.25461, 0.22151, 0.23333, 0.24087, 0.20501, 0.27418, 0.22745, 0.23603, 0.11659, 0.10435, 0.12262, 0.11506, 0.10579, 0.10282, 0.11296, 0.10289, 0.10328, 0.068807, 0.079995, 0.07748, 0.076007, 0.073046, 0.090806, 0.080092, 0.072603, 0.077063, 0.10811, 0.33296, 0.41297, 0.273, 0.37147, 0.29653, 0.38853, 0.29839, 0.21295, 0.17381, 0.30207, 0.19878, 0.19021, 0.22286, 0.18453, 0.21358, 0.22963, 0.24165, 0.19364, 0.25679, 0.1094, 0.10217, 0.1013, 0.11334, 0.11521, 0.10508, 0.087849, 0.069807, 0.083397, 0.079593, 0.074559, 0.073371, 0.079889, 0.073501, 0.088185, 0.073302, 0.063694, 0.074024, 0.24781, 0.37086, 0.38886, 0.43951, 0.34489, 0.38639, 0.40481, 0.18984, 0.26139, 0.27942, 0.19598, 0.32958, 0.24257, 0.2026, 0.2254, 0.21585, 0.24538, 0.23034, 0.25133, 0.12126, 0.1124, 0.11122, 0.074836, 0.068024, 0.071338, 0.076398, 0.067108, 0.072455, 0.068822, 0.071192, 0.075537, 0.088136, 0.069407, 0.072045, 0.077168, 0.065926, 0.076552, 0.42009, 0.28891, 0.35837, 0.38891, 0.35977, 0.37891, 0.32871, 0.45618, 0.44382, 0.18539, 0.2431, 0.23158, 0.27016, 0.22583, 0.25099, 0.24456, 0.21029, 0.25643, 0.20825, 0.2531, 0.067769, 0.072567, 0.075244, 0.073606, 0.073847, 0.080329, 0.07938, 0.073614, 0.083465, 0.072468, 0.066868, 0.070931, 0.073141, 0.065247, 0.080924, 0.088365, 0.077702, 0.074448, 0.35777, 0.42101, 0.33395, 0.34834, 0.31685, 0.36562, 0.30099, 0.50345, 0.37155, 0.20864, 0.27551, 0.20683, 0.14923, 0.17658, 0.1449, 0.16959, 0.11862, 0.16888, 0.21439, 0.13714, 0.077206, 0.076518, 0.079928, 0.071657, 0.061242, 0.069951, 0.080113, 0.070722, 0.077664, 0.074291, 0.07074, 0.078652, 0.074215, 0.078094, 0.071432, 0.072255, 0.063947, 0.077427, 0.34008, 0.46962, 0.44998, 0.37938, 0.39367, 0.32007, 0.46123, 0.3755, 0.3014, 0.19975, 0.19578, 0.11985, 0.18247, 0.13588, 0.14307, 0.17646, 0.17166, 0.22208, 0.1835, 0.11949, 0.074056, 0.067841, 0.083578, 0.081098, 0.07333, 0.080471, 0.07894, 0.063081, 0.064919, 0.070829, 0.076517, 0.074048, 0.079039, 0.085417, 0.077306, 0.073244, 0.079528, 0.075651, 0.31708, 0.29459, 0.31264, 0.36253, 0.41602, 0.35332, 0.25869, 0.19708, 0.17978, 0.18782, 0.18496, 0.16382, 0.17953, 0.18439, 0.18806, 0.18591, 0.17006, 0.13181, 0.16585, 0.1419, 0.076964, 0.076198, 0.085476, 0.07228, 0.07233, 0.078071, 0.067585, 0.080654, 0.078043, 0.073282, 0.070208, 0.081435, 0.075933, 0.077048, 0.071536, 0.081963, 0.072281, 0.068076, 0.42272, 0.33267, 0.365, 0.39116, 0.32633, 0.31799, 0.16312, 0.16605, 0.18178, 0.21806, 0.23319, 0.16387, 0.16513, 0.13655, 0.15051, 0.18702, 0.15332, 0.19417, 0.19337, 0.15471, 0.08707, 0.073229, 0.067233, 0.076555, 0.068174, 0.073969, 0.077595, 0.082935, 0.078322, 0.08716, 0.071304, 0.069356, 0.069817, 0.074401, 0.064943, 0.077857, 0.069602, 0.064373, 0.31392, 0.32447, 0.30417, 0.3874, 0.31916, 0.17194, 0.21968, 0.23078, 0.13268, 0.24267, 0.21365, 0.13411, 0.1427, 0.14928, 0.14516, 0.1856, 0.20404, 0.18022, 0.16802, 0.16339, 0.076675, 0.076421, 0.076382, 0.081668, 0.074794, 0.058889, 0.063702, 0.063591

,0.082136,0.087788,0.064023,0.080321,0.073127,0.073667,0.083572,0.076154,0.072797,0.075073,0.34079,0.26175,0.36539,0.21965,0.1606,0.22514,0.17691,0.16757,0.18019,0.15952,0.21713,0.21429,0.17593,0.15513,0.13785,0.1538,0.20246,0.14732,0.17684,0.18012,0.062958,0.073949,0.068439,0.078465,0.07319,0.081155,0.067493,0.073164,0.08968,0.07512,0.08005,0.069222,0.077461,0.067527,0.066382,0.075033,0.070785,0.074645,0.29588,0.15801,0.17759,0.1603,0.26136,0.1862,0.14603,0.19546,0.25865,0.26004,0.16794,0.1538,0.15721,0.16544,0.11291,0.21621,0.14575,0.16103,0.18466,0.075274,0.088876,0.077683,0.075974,0.067576,0.055025,0.074444,0.071646,0.076639,0.07904,0.082107,0.077367,0.073957,0.071969,0.084985,0.072412,0.083501,0.044923,0.21311,0.22505,0.18869,0.21688,0.18285,0.15966,0.15483,0.16816,0.19212,0.22563,0.15829,0.1778,0.20286,0.12747,0.17995,0.14564,0.15987,0.15194,0.20888,0.073559,0.073651,0.069969,0.080258,0.078069,0.081757,0.073484,0.078924,0.075361,0.068828,0.07044,0.073202,0.074993,0.081899,0.069025,0.068188,0.074413,0.03507,0.16717,0.19679,0.19191,0.18345,0.22279,0.19497,0.2134,0.18504,0.216,0.19617,0.13775,0.17759,0.21459,0.18924,0.16838,0.12282,0.17705,0.16534,0.070557,0.061159,0.078462,0.07461,0.075236,0.080951,0.067314,0.070963,0.076936,0.072276,0.067016,0.081584,0.080778,0.085676,0.073724,0.08375,0.07277,0.073796,0.049943,0.30384,0.16719,0.18922,0.25195,0.21439,0.10954,0.20775,0.18974,0.11798,0.21167,0.15431,0.17348,0.18891,0.15435,0.20058,0.16554,0.16056,0.14661,0.073592,0.077626,0.081877,0.073663,0.082982,0.074755,0.076339,0.078307,0.080026,0.073561,0.079399,0.07544,0.081104,0.074228,0.06771,0.075982,0.078808,0.04725,0.038545,0.032932,0.27065,0.19473,0.18857,0.22055,0.20352,0.20478,0.20352,0.14885,0.17112,0.16523,0.16238,0.14875,0.21106,0.1624,0.17659,0.077405,0.075809,0.080455,0.075745,0.079103,0.066557,0.07471,0.069123,0.079464,0.075492,0.07435,0.068579,0.073117,0.089507,0.078006,0.081349,0.083593,0.082529,0.043873,0.042221,0.042865,0.037405,0.23858,0.19807,0.18424,0.16165,0.17823,0.18816,0.20909,0.18472,0.23933,0.18326,0.18256,0.1252,0.07663,0.075573,0.077446,0.066577,0.080535,0.063666,0.073764,0.074947,0.079971,0.073991,0.077603,0.084404,0.08362,0.070499,0.075831,0.092988,0.076587,0.083132,0.064453,0.074413,0.031678,0.043189,0.038445,0.043964,0.039723,0.038246,0.22995,0.17343,0.26234,0.2076,0.23698,0.2427,0.23051,0.19288,0.074751,0.068162,0.075207,0.07676,0.064312,0.076918,0.077943,0.075196,0.08448,0.070396,0.096197,0.054606,0.098843,0.072494,0.07815,0.071337,0.074731,0.078924,0.073143,0.07216,0.076627,0.080949,0.078192,0.034269,0.04036,0.035358,0.044658,0.03971,0.044391,0.20377,0.2343,0.15546,0.1776,0.23298,0.045972,0.045866,0.074495,0.074674,0.077291,0.077852,0.079145,0.078824,0.072009,0.07529,0.06584,0.083627,0.074327,0.077732,0.080021,0.078985,0.072845,0.068954,0.087872,0.080511,0.069975,0.073318,0.074429,0.042756,0.048188,0.046918,0.044064,0.038739,0.04238,0.043761,0.037123,0.037025,0.039126,0.19504,0.23314,0.042411,0.038341,0.042649,0.039191,0.081542,0.074707,0.074677,0.079565,0.079379,0.06831,0.063783,0.086023,0.078222,0.078357,0.083618,0.07278,0.067289,0.076678,0.087291,0.075372,0.075913,0.069939,0.069243,0.040296,0.048114,0.04492,0.041444,0.036534,0.04086,0.034649,0.036277,0.041244,0.038899,0.047568,0.039598,0.03767,0.042038,0.044075,0.045921,0.035906,0.074565,0.068197,0.079219,0.067171,0.070742,0.069879,0.075125,0.069952,0.072663,0.086599,0.078477,0.070696,0.076607,0.080039,0.076907,0.073463,0.035638,0.036934,0.034504,0.041146,0.040016,0.04089,0.035997,0.043723,0.034791,0.040565,0.03872,0.047507,0.04144,0.034739,0.041767,0.037131,0.045001,0.043343,0.041205,0.08503,

0.069229,0.091285,0.084199,0.072852,0.0736,0.076778,0.073005,0.080879,  
0.072411,0.079137,0.07964,0.074007,0.042514,0.034178,0.046524,0.043999  
,0.041577,0.038955,0.03849,0.036927,0.039049,0.036006,0.041554,0.04267  
4,0.040661,0.044611,0.039637,0.045668,0.045458,0.041716,0.03049,0.0368  
68,0.038866,0.073784,0.083138,0.077634,0.066373,0.066893,0.083504,0.08  
0782,0.079155,0.069738,0.043115,0.041757,0.034828,0.046462,0.042179,0.  
040713,0.044546,0.044213,0.035064,0.035488,0.044504,0.04168,0.047951,0.  
.042225,0.04312,0.042409,0.043341,0.040579,0.03509,0.045223,0.036682,0.  
.042105,0.043251,0.037772,0.045001,0.074864,0.078358,0.066984,0.086133  
,0.035577,0.037774,0.050858,0.042133,0.040152,0.036492,0.037512,0.0413  
38,0.038289,0.03521,0.032489,0.04203,0.042889,0.039809,0.043436,0.0412  
04,0.037683,0.044258,0.047523,0.037057,0.038695,0.036351,0.041107,0.03  
8734,0.032521,0.043215,0.041024,0.037517,0.040009,0.039634,0.041179,0.  
041181,0.041878,0.037476,0.041249,0.048434,0.039016,0.035818,0.042685,  
0.043892,0.036133,0.040271,0.039631,0.039019,0.045311,0.042102,0.04150  
3,0.041163,0.041106,0.045073,0.040779,0.036325,0.040051,0.04304,0.0449  
57,0.041452,0.047546,0.038732,0.041122,0.033872,0.036747,0.041603,0.03  
9511,0.03894,0.042692,0.033713,0.037222,0.041063,0.038751,0.045363,0.0  
39003,0.037939,0.035201,0.039865,0.041767,0.038824,0.037684,0.040983,0.  
.037976,0.042731,0.032815,0.037665,0.044128,0.038469,0.04325,0.039378,  
0.04456,0.035297,0.044185,0.043802,0.042457,0.031208,0.042887,0.033574  
,0.043774,0.039419,0.043919,0.047694,0.033188,0.032567,0.043449,0.0464  
62,0.037033,0.040323,0.042665,0.038675,0.030579,0.050035,0.037404,0.04  
5842,0.04074,0.032792,0.041126,0.041478,0.048013,0.042682,0.041246,0.0  
36423,0.04001,0.048555,0.042407,0.034497,0.041169,0.045843,0.041609,0.  
039975,0.036814,0.03843,0.035319,0.042722,0.043854,0.039089,0.044802,0.  
.038528,0.042729,0.042605,0.038112,0.040333,0.046451,0.043505,0.0293,0.  
.031682,0.043624,0.03794,0.043582,0.032082,0.037652,0.03602,0.043751,0.  
.0441,0.044485,0.036042,0.045658,0.03826,0.043646,0.038056,0.045768,0.  
036355,0.038268,0.041755,0.040837,0.035702,0.032518,0.046676,0.035442,  
0.045148,0.045799,0.039888,0.039377,0.041266,0.039116,0.045692,0.04318  
3,0.045399,0.032603,0.033404,0.038479,0.03973,0.036583,0.037736,0.0392  
,0.034797,0.042195,0.042463,0.035947,0.037825,0.048749,0.042459,0.0378  
6,0.047071,0.038246,0.04064,0.042392,0.037643,0.032513  
0.10431,0.10361,0.10564,0.10383,0.10333,0.1125,0.11218,0.099439,0.1213  
9,0.10876,0.092078,0.11031,0.10315,0.11549,0.10762,0.10704,0.10976,0.1  
1557,0.09987,0.11428,0.2091,0.2473,0.2848,0.20677,0.11062,0.10979,0.10  
287,0.10985,0.10895,0.11139,0.11306,0.097617,0.11156,0.10565,0.10554,0.  
.11375,0.10735,0.10058,0.10509,0.30648,0.28376,0.24354,0.25527,0.27848  
,0.22867,0.21502,0.10899,0.11052,0.1128,0.096031,0.10783,0.099624,0.10  
237,0.11262,0.10781,0.10877,0.10973,0.10879,0.10991,0.10338,0.11097,0.  
35469,0.33292,0.24512,0.23561,0.22998,0.24963,0.23194,0.16013,0.2171,0.  
.31448,0.11047,0.10496,0.099771,0.11297,0.11615,0.11068,0.10376,0.1085  
1,0.11194,0.11048,0.10883,0.1126,0.10558,0.10906,0.11107,0.40751,0.383  
39,0.30853,0.19778,0.20074,0.22028,0.29533,0.20295,0.17449,0.20047,0.2  
3042,0.25591,0.10143,0.1099,0.11076,0.10178,0.10097,0.098126,0.10215,0.  
.10252,0.10891,0.11473,0.10895,0.10285,0.10638,0.1134,0.10807,0.10298,  
0.39311,0.34428,0.39148,0.28972,0.24019,0.18983,0.26819,0.25934,0.2258  
1,0.21735,0.21148,0.23293,0.25375,0.24632,0.10613,0.10291,0.10908,0.10  
837,0.11008,0.10261,0.10915,0.1102,0.10704,0.10952,0.098171,0.11085,0.  
1186,0.11018,0.11308,0.10491,0.4045,0.39262,0.39533,0.35752,0.38764,0.  
29237,0.24368,0.24328,0.25229,0.25477,0.17825,0.24168,0.23653,0.26195,

0.23028,0.21533,0.11398,0.1103,0.1175,0.10616,0.098998,0.10533,0.11174  
,0.10648,0.10731,0.11023,0.11381,0.10811,0.093093,0.10735,0.1137,0.110  
47,0.1053,0.41224,0.39418,0.29819,0.38544,0.36226,0.3097,0.22503,0.223  
44,0.20981,0.18164,0.24088,0.21549,0.20762,0.26806,0.19321,0.28083,0.2  
2072,0.10633,0.10513,0.099659,0.10539,0.10374,0.10157,0.10923,0.10956,  
0.103,0.10297,0.10373,0.11713,0.10983,0.075133,0.080075,0.085998,0.105  
61,0.28499,0.42083,0.34918,0.30853,0.3511,0.2502,0.37197,0.25227,0.251  
42,0.19034,0.19198,0.22075,0.21153,0.25606,0.22749,0.23218,0.18366,0.2  
1874,0.10504,0.11054,0.098664,0.10473,0.11305,0.10751,0.09689,0.10285,  
0.10282,0.10432,0.10629,0.078387,0.072505,0.069403,0.066286,0.074099,0  
.078563,0.11222,0.34144,0.40442,0.32805,0.38719,0.39211,0.32253,0.3090  
7,0.3006,0.19351,0.22543,0.2476,0.23284,0.22181,0.2205,0.20005,0.25481  
,0.21885,0.24401,0.11333,0.10296,0.11774,0.11076,0.10281,0.1018,0.1128  
7,0.10065,0.10288,0.067412,0.078833,0.074084,0.074331,0.073372,0.08552  
,0.079336,0.073704,0.077774,0.10417,0.32732,0.38114,0.29432,0.3823,0.3  
3283,0.41036,0.28416,0.21318,0.17906,0.27939,0.2242,0.19036,0.22553,0.  
19909,0.22912,0.22113,0.22483,0.18591,0.25827,0.10734,0.10152,0.10448,  
0.10835,0.10816,0.10091,0.088021,0.069373,0.081211,0.074736,0.074081,0  
.07333,0.07615,0.071604,0.084951,0.071675,0.062966,0.073805,0.25481,0.  
38996,0.4004,0.43586,0.33249,0.38546,0.36999,0.21514,0.27429,0.27465,0  
.19138,0.34383,0.22837,0.18963,0.21638,0.22474,0.22991,0.22174,0.23446  
,0.11669,0.11319,0.11048,0.072651,0.069288,0.072105,0.076006,0.066689,  
0.073551,0.065288,0.070128,0.07516,0.08572,0.064653,0.072804,0.076432,  
0.06406,0.073523,0.40225,0.29974,0.36505,0.36435,0.29566,0.35729,0.331  
21,0.45019,0.40803,0.19492,0.21255,0.22369,0.25681,0.24942,0.25914,0.2  
2548,0.21086,0.24938,0.20651,0.22829,0.067683,0.06963,0.070269,0.07026  
4,0.071601,0.076794,0.07938,0.070467,0.081652,0.072948,0.072859,0.0690  
99,0.07362,0.065823,0.078578,0.084962,0.076167,0.075812,0.35709,0.4416  
1,0.30419,0.338,0.33472,0.35375,0.27244,0.45392,0.37452,0.19422,0.2767  
7,0.19514,0.14765,0.18501,0.13952,0.17469,0.11109,0.18858,0.20439,0.12  
428,0.074895,0.077779,0.076361,0.070518,0.061602,0.068114,0.075201,0.0  
69119,0.073623,0.073316,0.070461,0.080067,0.072543,0.075662,0.069666,0  
.071814,0.0625,0.077393,0.34166,0.48039,0.42332,0.39017,0.39108,0.3460  
2,0.41315,0.42271,0.3009,0.19978,0.19535,0.13036,0.18386,0.14742,0.140  
32,0.1758,0.19411,0.21282,0.18063,0.11647,0.075094,0.06408,0.086019,0.  
078679,0.070482,0.079569,0.074844,0.063231,0.063587,0.06702,0.074706,0  
.072885,0.076321,0.085748,0.077153,0.077113,0.079255,0.070602,0.2891,0  
.29614,0.34441,0.35689,0.41492,0.34314,0.24333,0.18934,0.17783,0.19837  
,0.17119,0.14752,0.17568,0.18165,0.18314,0.18899,0.1613,0.12962,0.1569  
4,0.15026,0.078055,0.073193,0.082188,0.071065,0.072935,0.077366,0.0619  
05,0.078014,0.079461,0.071882,0.069291,0.078614,0.071461,0.074034,0.07  
4558,0.08095,0.069871,0.068144,0.41785,0.33223,0.34437,0.38348,0.33386  
,0.32271,0.14386,0.18136,0.17229,0.22958,0.21995,0.16913,0.1692,0.1337  
5,0.15528,0.18669,0.1659,0.19492,0.19387,0.16323,0.081818,0.071218,0.0  
67698,0.074159,0.067531,0.070598,0.078352,0.080395,0.075692,0.083902,0  
.067079,0.070108,0.068114,0.076011,0.063687,0.075991,0.069736,0.062302  
,0.315,0.32282,0.29663,0.37062,0.32749,0.16817,0.21798,0.21756,0.1406,  
0.23362,0.19783,0.13162,0.15371,0.16391,0.13113,0.17572,0.21765,0.1652  
2,0.16941,0.18783,0.075742,0.073743,0.074568,0.080394,0.071637,0.05786  
6,0.063004,0.060919,0.079961,0.082863,0.064966,0.071996,0.071296,0.070  
736,0.082169,0.074832,0.070559,0.075615,0.3806,0.29011,0.33458,0.21008  
,0.15409,0.22593,0.18652,0.1592,0.17057,0.15913,0.21864,0.1995,0.16218

,0.16666,0.14492,0.14884,0.18738,0.15724,0.16279,0.16217,0.064239,0.071584,0.066089,0.07513,0.073409,0.079883,0.063851,0.071452,0.089044,0.072813,0.075909,0.071369,0.076554,0.065469,0.066271,0.075227,0.071021,0.077125,0.34911,0.15357,0.18383,0.1803,0.26161,0.2031,0.14231,0.18698,0.25333,0.23466,0.17438,0.14957,0.16366,0.16582,0.11164,0.22719,0.15083,0.15002,0.18485,0.07309,0.085793,0.076956,0.075615,0.068762,0.052204,0.072432,0.067998,0.075296,0.077372,0.079817,0.073796,0.074503,0.07255,0.087627,0.0715,0.078443,0.046795,0.21504,0.21725,0.19326,0.19786,0.17887,0.16132,0.12624,0.16135,0.20472,0.18946,0.16237,0.16786,0.19346,0.13136,0.17998,0.13397,0.16853,0.13963,0.19147,0.072441,0.075635,0.066802,0.078244,0.075641,0.078779,0.073099,0.079704,0.074866,0.068797,0.068346,0.075171,0.071901,0.078619,0.069491,0.068107,0.076035,0.033741,0.17203,0.19124,0.17685,0.1825,0.21208,0.21351,0.20147,0.20035,0.19588,0.18858,0.13772,0.17678,0.20428,0.1858,0.16277,0.12895,0.18775,0.1623,0.071241,0.058604,0.074603,0.075138,0.07419,0.079314,0.067675,0.066897,0.074008,0.069274,0.064191,0.080889,0.080357,0.08593,0.07575,0.079691,0.073788,0.072767,0.046797,0.2887,0.17593,0.1893,0.22517,0.21908,0.11814,0.2116,0.17691,0.11795,0.19609,0.15825,0.16675,0.16985,0.16206,0.19468,0.15861,0.17622,0.14314,0.074188,0.07553,0.077246,0.072574,0.080156,0.073101,0.077283,0.073795,0.080201,0.071452,0.077263,0.071544,0.082604,0.072372,0.06451,0.072518,0.077184,0.046102,0.035422,0.031701,0.27672,0.1996,0.19983,0.21588,0.1916,0.20147,0.20966,0.1421,0.17047,0.16546,0.15333,0.14725,0.20064,0.16681,0.19115,0.073859,0.074686,0.079224,0.075283,0.078813,0.062048,0.070091,0.069618,0.080277,0.072793,0.073819,0.0673,0.072884,0.085293,0.075345,0.07832,0.078603,0.079633,0.043565,0.042485,0.040752,0.037472,0.24003,0.19281,0.17607,0.15515,0.17818,0.19177,0.21212,0.18126,0.24257,0.19601,0.16898,0.1313,0.077826,0.071913,0.072132,0.06888,0.076201,0.063452,0.072102,0.076288,0.074651,0.072901,0.076066,0.082399,0.081923,0.073408,0.07414,0.089904,0.072062,0.082227,0.061683,0.070924,0.03111,0.045591,0.039211,0.040672,0.038094,0.03725,0.23818,0.15986,0.25939,0.21853,0.19937,0.22274,0.24843,0.18937,0.069978,0.069033,0.072035,0.071655,0.060054,0.073975,0.076615,0.07206,0.08068,0.067783,0.094062,0.054247,0.093228,0.072409,0.075926,0.068565,0.073726,0.075683,0.076164,0.06857,0.078115,0.082408,0.076458,0.034259,0.041037,0.037,0.045811,0.039626,0.042068,0.19975,0.24435,0.15931,0.17399,0.22804,0.044551,0.040987,0.074294,0.075087,0.077327,0.073626,0.076072,0.074682,0.068298,0.074112,0.06375,0.083799,0.073371,0.075764,0.076054,0.075947,0.068595,0.069062,0.084929,0.077366,0.06812,0.070655,0.074071,0.041839,0.049486,0.04542,0.040468,0.036526,0.041384,0.044166,0.032565,0.040774,0.038008,0.19517,0.2276,0.045237,0.035517,0.044285,0.039714,0.079448,0.072321,0.071228,0.075789,0.076598,0.069339,0.064884,0.085993,0.077118,0.073022,0.079158,0.071118,0.066537,0.075383,0.083251,0.070451,0.072423,0.067572,0.068453,0.039106,0.049223,0.043298,0.037347,0.03734,0.04256,0.039406,0.035654,0.040832,0.037487,0.047488,0.037747,0.038153,0.041843,0.044181,0.044501,0.036103,0.072831,0.06651,0.079336,0.063272,0.068344,0.069062,0.073575,0.072758,0.072307,0.085135,0.07882,0.068519,0.073421,0.080617,0.074895,0.070305,0.038249,0.033268,0.039148,0.040757,0.040579,0.041653,0.037527,0.042009,0.036972,0.038003,0.040728,0.044931,0.041239,0.033636,0.04261,0.036538,0.043225,0.042343,0.040033,0.082296,0.069922,0.0933,0.082398,0.069395,0.074899,0.074485,0.072433,0.07403,0.072838,0.075382,0.08022,0.067722,0.040966,0.033652,0.046595,0.042329,0.043089,0.039776,0.036868,0.037154,0.037558,0.0





|         |         |         |         |         |         |   |
|---------|---------|---------|---------|---------|---------|---|
| 0       | 0       | 0       | 0       | 0       | 0       | 0 |
| 0       | 0       | 0       | 0       | 0       | 0       | 0 |
| 0       | 0       | 0       | 0       | 0       | 0       | 0 |
| 0       | 0       | 0       | 0       | 0       | 0       | 0 |
| 0       | 0       | 0       | 0       | 0       | 0       | 0 |
| 0       | 0       | 0       | 0       | 0       | 0       | 0 |
| 0       | 0       | 0       | 0       | 0       | 0       | 0 |
| 0       | 0       | 0       | 0       | 0       | 0       | 0 |
| 0       | 0       | 0       | 0       | 0       | 0       | 0 |
| 0       | 0       | 0       | 0       | 0       | 0       | 0 |
| 0       | 0       | 0       | 0       | 0       | 0       | 0 |
| 0       | 0       | 0       | 0       | 0       | 0       | 0 |
| 0       | 0       | 0       | 0       | 0       | 0       | 0 |
| 0       | 0       | 0       | 0       | 0       | 0       | 0 |
| 0       | 0       | 0       | 0       | 0       | 0       | 0 |
| 0       | 0       | 0       | 0       | 0       | 0       | 0 |
| 0       | 0       | 0       | 0       | 0       | 0       | 0 |
| 0       | 0       | 0       | 0       | 0       | 0       | 0 |
| 0       | 0       | 0       | 0       | 0       | 0       | 0 |
| 0       | 0       | 0       | 0       | 0       | 0       | 0 |
| 0       | 0       | 0       | 0       | 0       | 0       | 0 |
| 0       | 0       | 0       | 0       | 0       | 0       | 0 |
| 0       | 0       | 0       | 0.54548 | 0.5     | 0.44643 | 0 |
| 0       | 0       | 0       | 0       | 0       | 0       | 0 |
| 0       | 0       | 0       | 0       | 0       | 0       | 0 |
| 0       | 0       | 0       | 0       | 0       | 0       | 0 |
| 0       | 0       | 0       | 0       | 0       | 0       | 0 |
| 0       | 0       | 0       | 0       | 0       | 0       | 0 |
| 0       | 0       | 0       | 0       | 0       | 0       | 0 |
| 0.5     | 0.38922 | 0.5     | 0.55132 | 0.5     | 0.54227 | 0 |
| 0       | 0       | 0       | 0       | 0       | 0       | 0 |
| 0       | 0       | 0       | 0       | 0       | 0       | 0 |
| 0       | 0       | 0       | 0       | 0       | 0       | 0 |
| 0       | 0       | 0       | 0       | 0       | 0       | 0 |
| 0       | 0       | 0       | 0       | 0       | 0       | 0 |
| 0.55073 | 0.55826 | 0.5     | 0.54574 | 0.5     | 0.46169 | 0 |
| 0.55336 | 0       | 0       | 0       | 0.45762 | 0.51325 | 0 |
| 0       | 0       | 0       | 0       | 0       | 0       | 0 |
| 0       | 0       | 0       | 0       | 0       | 0       | 0 |
| 0       | 0       | 0       | 0       | 0       | 0       | 0 |
| 0       | 0       | 0       | 0.49285 | 0.5     | 0.41147 | 0 |
| 0.56106 | 0.5     | 0.49428 | 0.56929 | 0.60297 | 0.55256 | 0 |
| 0.5     | 0.56646 | 0.46739 | 0       | 0       | 0       | 0 |
| 0       | 0       | 0       | 0       | 0       | 0       | 0 |
| 0       | 0       | 0       | 0       | 0       | 0       | 0 |
| 0       | 0       | 0       | 0       | 0       | 0       | 0 |
| 0       | 0.5     | 0.67658 | 0.5059  | 0.61793 | 0.5     | 0 |
| 0.46619 | 0.48164 | 0.5     | 0.52469 | 0.59386 | 0.50275 | 0 |
| 0.46235 | 0.53217 | 0.5     | 0.5     | 0       | 0       | 0 |
| 0       | 0       | 0       | 0       | 0       | 0       | 0 |
| 0       | 0       | 0       | 0       | 0       | 0       | 0 |

|         |         |         |         |         |         |
|---------|---------|---------|---------|---------|---------|
| 0       | 0       | 0       | 0       | 0       | 0       |
| 0.5     | 0.56077 | 0.5     | 0.51916 | 0.41945 | 0.5     |
| 0.56346 | 0.4984  | 0.4745  | 0.5     | 0.48817 | 0.40112 |
| 0.53358 | 0.45307 | 0.54768 | 0.5     | 0.56591 | 0.5     |
| 0       | 0       | 0       | 0       | 0       | 0       |
| 0       | 0       | 0       | 0       | 0       | 0.33333 |
| 0.34312 | 0.41239 | 0.40185 | 0.37256 | 0.33333 | 0.33333 |
| 0.32543 | 0.34223 | 0.5     | 0.5     | 0.43466 | 0.5     |
| 0.5     | 0.51304 | 0.5     | 0.47701 | 0.5     | 0.5     |
| 0.52911 | 0.5085  | 0.46177 | 0.58669 | 0.5     | 0.50578 |
| 0.5     | 0.5     | 0       | 0       | 0       | 0       |
| 0       | 0       | 0       | 0       | 0       | 0.49678 |
| 0.32109 | 0.32889 | 0.33333 | 0.33333 | 0.31331 | 0.4012  |
| 0.35532 | 0.39086 | 0.33333 | 0.34013 | 0.49453 | 0.44607 |
| 0.4576  | 0.51205 | 0.58655 | 0.46215 | 0.43727 | 0.5     |
| 0.50393 | 0.44209 | 0.72355 | 0.5     | 0.51928 | 0.5     |
| 0.5085  | 0.5     | 0.49485 | 0.50109 | 0       | 0       |
| 0       | 0       | 0       | 0       | 0       | 0.45709 |
| 0.44155 | 0.49547 | 0.33368 | 0.20421 | 0.33333 | 0.32285 |
| 0.34023 | 0.33333 | 0.35688 | 0.33333 | 0.34106 | 0.334   |
| 0.51837 | 0.47494 | 0.41169 | 0.46412 | 0.4547  | 0.45301 |
| 0.5     | 0.54423 | 0.5     | 0.51163 | 0.5     | 0.49248 |
| 0.5     | 0.38134 | 0.55939 | 0.48    | 0.47031 | 0.36482 |
| 0       | 0       | 0       | 0       | 0       | 0       |
| 0.52953 | 0.36997 | 0.56768 | 0.44662 | 0.58043 | 0.34926 |
| 0.30557 | 0.33421 | 0.39704 | 0.33333 | 0.33333 | 0.33333 |
| 0.33333 | 0.37179 | 0.54213 | 0.5     | 0.40649 | 0.52814 |
| 0.5     | 0.44097 | 0.52811 | 0.5     | 0.57753 | 0.26904 |
| 0.48449 | 0.42114 | 0.5     | 0.53425 | 0.56298 | 0.54892 |
| 0.5     | 0.48934 | 0       | 0       | 0       | 0       |
| 0       | 0.5     | 0.49661 | 0.41099 | 0.5     | 0.5     |
| 0.51895 | 0.36987 | 0.35887 | 0.34565 | 0.36668 | 0.35383 |
| 0.42321 | 0.37171 | 0.4275  | 0.34455 | 0.51186 | 0.43933 |
| 0.34814 | 0.54843 | 0.46076 | 0.50516 | 0.5     | 0.5     |
| 0.46312 | 0.5     | 0.46461 | 0.48117 | 0.4924  | 0.52776 |
| 0.4758  | 0.49701 | 0.5     | 0.30982 | 0       | 0       |
| 0       | 0.59245 | 0.5     | 0.4859  | 0.59057 | 0.57812 |
| 0.52755 | 0.54905 | 0.49172 | 0.42233 | 0.34732 | 0.41013 |
| 0.33333 | 0.40804 | 0.35021 | 0.29987 | 0.25994 | 0.32908 |
| 0.40758 | 0.49425 | 0.5146  | 0.5     | 0.49193 | 0.50445 |
| 0.5     | 0.56119 | 0.5     | 0.47277 | 0.5     | 0.59057 |
| 0.50156 | 0.5     | 0.49687 | 0.5     | 0.49799 | 0.5     |
| 0       | 0.5     | 0.5     | 0.5     | 0.48781 | 0.4903  |
| 0.52232 | 0.5     | 0.5     | 0.44102 | 0.33333 | 0.38624 |
| 0.28912 | 0.35349 | 0.36859 | 0.3648  | 0.36002 | 0.29751 |
| 0.37987 | 0.51352 | 0.5     | 0.5714  | 0.56488 | 0.50889 |
| 0.50957 | 0.52838 | 0.4017  | 0.43994 | 0.48414 | 0.54581 |
| 0.47845 | 0.4792  | 0.48134 | 0.5059  | 0.51375 | 0.5     |
| 1       | 0.5     | 0.602   | 0.5     | 0.5     | 0.5     |
| 0.52471 | 0.5     | 0.5     | 0.68298 | 0.40834 | 0.33333 |
| 0.34108 | 0.38319 | 0.33114 | 0.42063 | 0.31796 | 0.36057 |
| 0.39263 | 0.33712 | 0.53903 | 0.63533 | 0.54114 | 0.5     |

|         |         |         |         |         |         |
|---------|---------|---------|---------|---------|---------|
| 0.27834 | 0.72481 | 0.44075 | 0.53851 | 0.5     | 0.43603 |
| 0.52089 | 0.49034 | 0.53421 | 0.5     | 0.44167 | 0.49612 |
| 0.5     | 1       | 0.35469 | 0.50572 | 0.50811 | 0.50206 |
| 0.32304 | 0.45054 | 0.51344 | 0.5     | 0.65888 | 0.46354 |
| 0.33943 | 0.33333 | 0.34332 | 0.37494 | 0.35637 | 0.23791 |
| 0.32661 | 0.35446 | 0.5     | 0.5     | 0.53758 | 0.40866 |
| 0.46541 | 0.5518  | 0.5     | 0.46847 | 0.64698 | 0.41459 |
| 0.48082 | 0.48569 | 0.49016 | 0.5     | 0.5     | 0.5     |
| 0.49363 | 0.5     | 1       | 0.45315 | 0.62298 | 0.45103 |
| 0.48568 | 0.51879 | 0.42046 | 0.54665 | 0.54559 | 0.53502 |
| 0.5     | 0.30893 | 0.28839 | 0.25134 | 0.36095 | 0.29809 |
| 0.35704 | 0.32409 | 0.29519 | 0.5     | 0.51347 | 0.46075 |
| 0.47447 | 0.5     | 0.54933 | 0.55252 | 0.52873 | 0.43168 |
| 0.5     | 0.5     | 0.5     | 0.57698 | 0.52232 | 0.5     |
| 0.49896 | 0.45838 | 1       | 1       | 1       | 0.41542 |
| 0.62006 | 0.55163 | 0.5     | 0.56516 | 0.51746 | 0.5     |
| 0.55789 | 0.40883 | 0.40081 | 0.36725 | 0.33712 | 0.35179 |
| 0.25369 | 0.33333 | 0.5     | 0.42285 | 0.51337 | 0.47575 |
| 0.49441 | 0.55031 | 0.5     | 0.56988 | 0.5207  | 0.56612 |
| 0.49974 | 0.49746 | 0.40533 | 0.4375  | 0.47588 | 0.47239 |
| 0.5428  | 0.51602 | 1       | 1       | 1       | 1       |
| 0.50965 | 0.52398 | 0.5     | 0.45233 | 0.46973 | 0.51068 |
| 0.50147 | 0.53965 | 0.5     | 0.33333 | 0.32182 | 0.30535 |
| 0.45766 | 0.50384 | 0.27248 | 0.41311 | 0.45682 | 0.4849  |
| 0.53313 | 0.5232  | 0.43761 | 0.5     | 0.51541 | 0.4559  |
| 0.5     | 0.47607 | 0.52751 | 0.46156 | 0.5     | 0.43667 |
| 0.5082  | 0.63033 | 1       | 1       | 1       | 1       |
| 1       | 1       | 0.5     | 0.62614 | 0.5     | 0.5186  |
| 0.5556  | 0.35099 | 0.41326 | 0.70483 | 0.48093 | 0.60187 |
| 0.51511 | 0.50504 | 0.5     | 0.4454  | 0.31764 | 0.55781 |
| 0.50796 | 0.5     | 0.54975 | 0.4749  | 0.5     | 0.51394 |
| 0.54949 | 0.5     | 0.51271 | 0.5     | 0.54501 | 0.5     |
| 0.4336  | 0.36308 | 0.42623 | 1       | 1       | 1       |
| 1       | 1       | 1       | 0.45185 | 0.65688 | 0.5     |
| 0.4882  | 0.5451  | 1       | 1       | 0.5     | 0.4239  |
| 0.5     | 0.47396 | 0.51951 | 0.53265 | 0.5     | 0.53706 |
| 0.53941 | 0.49994 | 0.43814 | 0.5     | 0.50961 | 0.44677 |
| 0.50146 | 0.35275 | 0.65424 | 0.5     | 0.47766 | 0.37264 |
| 0.52242 | 1       | 1       | 1       | 1       | 1       |
| 1       | 1       | 1       | 1       | 1       | 0.5     |
| 0.5     | 1       | 1       | 1       | 1       | 0.52273 |
| 0.5     | 0.68822 | 0.41371 | 0.57763 | 0.48173 | 0.49569 |
| 0.52357 | 0.45454 | 0.42211 | 0.5     | 0.53706 | 0.37305 |
| 0.5     | 0.34926 | 0.57272 | 0.52737 | 0.48282 | 0.48539 |
| 1       | 1       | 1       | 1       | 1       | 1       |
| 1       | 1       | 1       | 1       | 1       | 1       |
| 1       | 1       | 1       | 1       | 1       | 0.52661 |
| 0.3896  | 0.42122 | 0.58583 | 0.38299 | 0.5     | 0.5     |
| 0.42629 | 0.55766 | 0.42362 | 0.5     | 0.5     | 0.48097 |
| 0.40798 | 0.35838 | 0.47839 | 1       | 1       | 1       |
| 1       | 1       | 1       | 1       | 1       | 1       |
| 1       | 1       | 1       | 1       | 1       | 1       |

|         |         |         |         |         |         |         |
|---------|---------|---------|---------|---------|---------|---------|
| 1       | 1       | 1       | 1       | 0.53035 | 0.5     |         |
| 0.48754 | 0.54496 |         | 0.5     | 0.5     | 0.50222 | 0.51095 |
| 0.5     | 0.57958 | 0.56542 | 0.51951 | 0.52955 |         | 1       |
| 1       | 1       | 1       | 1       | 1       | 1       | 1       |
| 1       | 1       | 1       | 1       | 1       | 1       | 1       |
| 1       | 1       | 1       | 1       | 1       | 1       | 1       |
| 1       | 1       | 0.5     | 0.32088 | 0.45069 | 0.52802 |         |
| 0.52017 | 0.50395 | 0.45856 | 0.41988 |         | 0.5     | 1       |
| 1       | 1       | 1       | 1       | 1       | 1       | 1       |
| 1       | 1       | 1       | 1       | 1       | 1       | 1       |
| 1       | 1       | 1       | 1       | 1       | 1       | 1       |
| 1       | 1       | 1       | 1       | 1       | 1       | 1       |
| 0.57817 | 0.45705 | 0.56151 |         | 0.5     | 1       | 1       |
| 1       | 1       | 1       | 1       | 1       | 1       | 1       |
| 1       | 1       | 1       | 1       | 1       | 1       | 1       |
| 1       | 1       | 1       | 1       | 1       | 1       | 1       |
| 1       | 1       | 1       | 1       | 1       | 1       | 1       |
| 1       | 1       | 1       | 1       | 1       | 1       | 1       |
| 1       | 1       | 1       | 1       | 1       | 1       | 1       |
| 1       | 1       | 1       | 1       | 1       | 1       | 1       |
| 1       | 1       | 1       | 1       | 1       | 1       | 1       |
| 1       | 1       | 1       | 1       | 1       | 1       | 1       |
| 1       | 1       | 1       | 1       | 1       | 1       | 1       |
| 1       | 1       | 1       | 1       | 1       | 1       | 1       |
| 1       | 1       | 1       | 1       | 1       | 1       | 1       |
| 1       | 1       | 1       | 1       | 1       | 1       | 1       |
| 1       | 1       | 1       | 1       | 1       | 1       | 1       |
| 1       | 1       | 1       | 1       | 1       | 1       | 1       |
| 1       | 1       | 1       | 1       | 1       | 1       | 1       |
| 1       | 1       | 1       | 1       | 1       | 1       | 1       |
| 1       | 1       | 1       | 1       | 1       | 1       | 1       |
| 1       | 1       | 1       | 1       | 1       | 1       | 1       |
| 1       | 1       | 1       | 1       | 1       | 1       | 1       |
| 1       | 1       | 1       | 1       | 1       | 1       | 1       |
| 1       | 1       | 1       | 1       | 1       | 1       | 1       |
| 1       | 1       | 1       | 1       | 1       | 1       | 1       |
| 1       | 1       | 1       | 1       | 1       | 1       | 1       |
| 1       | 1       | 1       | 1       | 1       | 1       | 1       |
| 1       | 1       | 1       | 1       | 1       | 1       | 1       |
| 1       | 1       | 1       | 1       | 1       | 1       | 1       |
| 1       | 1       | 1       | 1       | 1       | 1       | 1       |
| 1       | 1       | 1       | 1       | 1       | 1       | 1       |
| 1       | 1       | 1       | 1       | 1       | 1       | 1       |
| 1       | 1       | 1       | 1       | 1       | 1       | 1       |
| gtSs=1  |         | 1       | 1       | 1       | 1       | 1       |
| 1       | 1       | 1       | 1       | 1       | 1       | 1       |
| 1       | 1       | 1       | 1       | 1       | 1       | 1       |
| 1       | 1       | 0.58718 | 0.60442 | 0.4756  | 0.46726 |         |
| 1       | 1       | 1       | 1       | 1       | 1       | 1       |
| 1       | 1       | 1       | 1       | 1       | 1       | 1       |

|         |         |         |         |         |         |         |  |
|---------|---------|---------|---------|---------|---------|---------|--|
| 1       | 1       | 1       | 0       | 0.49985 | 0.54023 |         |  |
| 0.5     | 0.47075 | 0.4906  | 0.4873  | 1       | 1       |         |  |
| 1       | 1       | 1       | 1       | 1       | 1       |         |  |
| 1       | 1       | 1       | 1       | 1       | 1       |         |  |
| 1       | 0       | 0       | 0.56415 | 0.5     | 0.56422 |         |  |
| 0.5     | 0.59727 | 0.51184 | 0.52698 | 0.5     | 1       |         |  |
| 1       | 1       | 1       | 1       | 1       | 1       |         |  |
| 1       | 1       | 1       | 1       | 1       | 1       |         |  |
| 1       | 1       | 0       | 0       | 0       | 0.55576 |         |  |
| 0.46039 | 0.33538 | 0.51971 |         | 0.5     | 0.5     | 0.55644 |  |
| 0.51015 | 0.5295  | 1       |         | 1       | 1       | 1       |  |
| 1       | 1       | 1       | 1       | 1       | 1       | 1       |  |
| 1       | 1       | 1       | 1       | 1       | 1       | 1       |  |
| 0       | 0       | 0       | 0       | 0.5     | 0.5     |         |  |
| 0.5     | 0.50364 | 0.41142 | 0.52453 | 0.53883 | 0.57751 |         |  |
| 0.48451 | 0.56244 | 1       | 1       | 1       | 1       | 1       |  |
| 1       | 1       | 1       | 1       | 1       | 1       | 1       |  |
| 1       | 1       | 1       | 1       | 1       | 1       | 1       |  |
| 0       | 0       | 0       | 0       | 0       | 0       | 0       |  |
| 0.45162 | 0.46919 | 0.47308 | 0.52782 | 0.58663 | 0.43053 |         |  |
| 0.5     | 0.54112 | 0.47976 | 0.37899 | 1       | 1       |         |  |
| 1       | 1       | 1       | 1       | 1       | 1       |         |  |
| 1       | 1       | 1       | 1       | 1       | 1       |         |  |
| 1       | 1       | 1       | 0       | 0       | 0       |         |  |
| 0       | 0       | 0       | 0.38132 | 0.53967 | 0.56398 |         |  |
| 0.43463 | 0.5     | 0.48589 | 0.46783 | 0.50957 | 0.57875 |         |  |
| 0.42412 | 0.51065 | 1       | 1       | 1       | 1       | 1       |  |
| 1       | 1       | 1       | 1       | 1       | 1       | 1       |  |
| 1       | 1       | 1       | 0.45452 | 0.5     | 0.55357 |         |  |
| 1       | 0       | 0       | 0       | 0       | 0       |         |  |
| 0       | 0       | 0.5747  | 0.36124 | 0.50328 | 0.38784 |         |  |
| 0.50437 | 0.50183 | 0.51581 |         | 0.5     | 0.5     | 0.5     |  |
| 0.47753 | 1       | 1       | 1       | 1       | 1       | 1       |  |
| 1       | 1       | 1       | 1       | 1       | 1       | 1       |  |
| 0.5     | 0.61078 | 0.5     | 0.44868 | 0.5     | 0.45773 |         |  |
| 1       | 0       | 0       | 0       | 0       | 0       |         |  |
| 0       | 0       | 0.48395 | 0.40553 | 0.5     | 0.48388 |         |  |
| 0.5     | 0.36406 | 0.53974 | 0.55147 | 0.48836 | 0.52247 |         |  |
| 0.5     | 1       | 1       | 1       | 1       | 1       | 1       |  |
| 1       | 1       | 1       | 1       | 0.5     | 0.53831 |         |  |
| 0.44927 | 0.44174 |         | 0.5     | 0.45426 | 0.54238 | 0.48675 |  |
| 0.44664 | 1       |         | 0       | 0       | 0       | 0       |  |
| 0       | 0       | 0       | 0.48334 | 0.51611 | 0.48007 |         |  |
| 0.42078 | 0.56869 | 0.45463 | 0.56262 | 0.51199 | 0.5715  |         |  |
| 0.5708  | 0.47177 | 0.5     | 1       | 1       | 1       | 1       |  |
| 1       | 1       | 1       | 0.50715 | 0.5     | 0.58853 |         |  |
| 0.43894 | 0.5     | 0.50572 | 0.43071 | 0.39703 | 0.44744 |         |  |
| 0.5     | 0.43354 | 0.53261 | 0       | 0       | 0       |         |  |
| 0       | 0       | 0       | 0       | 0.44313 | 0.48312 |         |  |
| 0.5     | 0.5     | 0.53759 | 0.45775 | 0.38338 | 0.49915 |         |  |
| 0.4128  | 0.4674  | 0.45806 | 0.42736 | 1       | 1       | 1       |  |
| 1       | 0.5     | 0.32342 | 0.4941  | 0.38207 | 0.5     |         |  |

|         |         |         |         |         |         |
|---------|---------|---------|---------|---------|---------|
| 0.53381 | 0.51836 | 0.5     | 0.47531 | 0.40614 | 0.49725 |
| 0.53765 | 0.46783 | 0.5     | 0.5     | 0       | 0       |
| 0       | 0       | 0       | 0       | 0       | 0       |
| 0       | 0.50767 | 0.44373 | 0.45444 | 0.41638 | 0.51335 |
| 0.45597 | 0.5     | 0.5     | 0.37438 | 0.5     | 0.53195 |
| 0.5     | 0.43923 | 0.5     | 0.48084 | 0.58055 | 0.5     |
| 0.43654 | 0.5016  | 0.5255  | 0.5     | 0.51183 | 0.59888 |
| 0.46642 | 0.54693 | 0.45232 | 0.5     | 0.43409 | 0.5     |
| 0       | 0       | 0       | 0       | 0       | 0       |
| 0       | 0       | 0       | 0.56164 | 0.49506 | 0.33333 |
| 0.34312 | 0.224   | 0.10316 | 0.29468 | 0.33333 | 0.33333 |
| 0.33729 | 0.31554 | 0.5     | 0.5     | 0.56534 | 0.5     |
| 0.5     | 0.48696 | 0.5     | 0.52299 | 0.5     | 0.5     |
| 0.47089 | 0.4915  | 0.53823 | 0.41331 | 0.5     | 0.49422 |
| 0.5     | 0.5     | 0       | 0       | 0       | 0       |
| 0       | 0       | 0       | 0       | 0       | 0       |
| 0.35344 | 0.42515 | 0.33333 | 0.33333 | 0.34335 | 0.1976  |
| 0.36984 | 0.42831 | 0.33333 | 0.34389 | 0.50547 | 0.55393 |
| 0.5424  | 0.48795 | 0.41345 | 0.53785 | 0.56273 | 0.5     |
| 0.49607 | 0.55791 | 0.27645 | 0.5     | 0.48072 | 0.5     |
| 0.4915  | 0.5     | 0.50515 | 0.49891 | 0       | 0       |
| 0       | 0       | 0       | 0       | 0       | 0       |
| 0       | 0       | 0.4122  | 0.3716  | 0.33333 | 0.39744 |
| 0.34023 | 0.33333 | 0.28624 | 0.33333 | 0.31787 | 0.334   |
| 0.48163 | 0.52506 | 0.58831 | 0.53588 | 0.5453  | 0.54699 |
| 0.5     | 0.45577 | 0.5     | 0.48837 | 0.5     | 0.50752 |
| 0.5     | 0.61866 | 0.44061 | 0.52    | 0.52969 | 0.63518 |
| 0       | 0       | 0       | 0       | 0       | 0       |
| 0       | 0       | 0       | 0       | 0       | 0.30147 |
| 0.37186 | 0.33159 | 0.40958 | 0.33333 | 0.33333 | 0.33333 |
| 0.33333 | 0.26531 | 0.45787 | 0.5     | 0.59351 | 0.47186 |
| 0.5     | 0.55903 | 0.47189 | 0.5     | 0.42247 | 0.73096 |
| 0.51551 | 0.57886 | 0.5     | 0.46575 | 0.43702 | 0.45108 |
| 0.5     | 0.51066 | 0       | 0       | 0       | 0       |
| 0       | 0       | 0       | 0       | 0       | 0       |
| 0       | 0.26026 | 0.31739 | 0.30264 | 0.29147 | 0.35383 |
| 0.15359 | 0.30433 | 0.26797 | 0.45818 | 0.48814 | 0.56067 |
| 0.65186 | 0.45157 | 0.53924 | 0.49484 | 0.5     | 0.5     |
| 0.53688 | 0.5     | 0.53539 | 0.51883 | 0.5076  | 0.47224 |
| 0.5242  | 0.50299 | 0.5     | 0.69018 | 0       | 0       |
| 0       | 0       | 0       | 0       | 0       | 0       |
| 0       | 0       | 0       | 0.20541 | 0.31964 | 0.36389 |
| 0.33333 | 0.29258 | 0.28469 | 0.35006 | 0.36097 | 0.33633 |
| 0.59242 | 0.50575 | 0.4854  | 0.5     | 0.50807 | 0.49555 |
| 0.5     | 0.43881 | 0.5     | 0.52723 | 0.5     | 0.40943 |
| 0.49844 | 0.5     | 0.50313 | 0.5     | 0.50201 | 0.5     |
| 0       | 0       | 0       | 0       | 0       | 0       |
| 0       | 0       | 0       | 0       | 0.33333 | 0.29074 |
| 0.35544 | 0.35349 | 0.23387 | 0.27795 | 0.27844 | 0.35125 |
| 0.33947 | 0.48648 | 0.5     | 0.4286  | 0.43512 | 0.49111 |
| 0.49043 | 0.47162 | 0.5983  | 0.56006 | 0.51586 | 0.45419 |
| 0.52155 | 0.5208  | 0.51866 | 0.4941  | 0.48625 | 0.5     |

|         |         |         |         |         |         |   |
|---------|---------|---------|---------|---------|---------|---|
| 0       | 0       | 0       | 0       | 0       | 0       | 0 |
| 0       | 0       | 0       | 0       | 0       | 0.33333 |   |
| 0.30656 | 0.23362 | 0.33443 | 0.3523  | 0.34116 | 0.33626 |   |
| 0.25367 | 0.2659  | 0.46097 | 0.36467 | 0.45886 | 0.5     |   |
| 0.72166 | 0.27519 | 0.55925 | 0.46149 | 0.5     | 0.56397 |   |
| 0.47911 | 0.50966 | 0.46579 | 0.5     | 0.55833 | 0.50388 |   |
| 0.5     | 0       | 0       | 0       | 0       | 0       |   |
| 0       | 0       | 0       | 0       | 0       | 0       |   |
| 0.31164 | 0.33333 | 0.34332 | 0.33302 | 0.28726 | 0.38105 |   |
| 0.33464 | 0.32967 | 0.5     | 0.5     | 0.46242 | 0.59134 |   |
| 0.53459 | 0.4482  | 0.5     | 0.53153 | 0.35302 | 0.58541 |   |
| 0.51918 | 0.51431 | 0.50984 | 0.5     | 0.5     | 0.5     |   |
| 0.50637 | 0.5     | 0       | 0       | 0       | 0       |   |
| 0       | 0       | 0       | 0       | 0       | 0       |   |
| 0       | 0.36939 | 0.3558  | 0.40602 | 0.36095 | 0.35095 |   |
| 0.41012 | 0.35959 | 0.36792 | 0.5     | 0.48653 | 0.53925 |   |
| 0.52553 | 0.5     | 0.45067 | 0.44748 | 0.47127 | 0.56832 |   |
| 0.5     | 0.5     | 0.5     | 0.42302 | 0.47768 | 0.5     |   |
| 0.50104 | 0.54162 | 0       | 0       | 0       | 0       |   |
| 0       | 0       | 0       | 0       | 0       | 0       |   |
| 0       | 0       | 0.19837 | 0.34846 | 0.33712 | 0.35179 |   |
| 0.42577 | 0.33333 | 0.5     | 0.57715 | 0.48663 | 0.52425 |   |
| 0.50559 | 0.44969 | 0.5     | 0.43012 | 0.4793  | 0.43388 |   |
| 0.50026 | 0.50254 | 0.59467 | 0.5625  | 0.52412 | 0.52761 |   |
| 0.4572  | 0.48398 | 0       | 0       | 0       | 0       |   |
| 0       | 0       | 0       | 0       | 0       | 0       |   |
| 0       | 0       | 0       | 0.33333 | 0.33909 | 0.33139 |   |
| 0.54234 | 0.49616 | 0.72752 | 0.58689 | 0.54318 | 0.5151  |   |
| 0.46687 | 0.4768  | 0.56239 | 0.5     | 0.48459 | 0.5441  |   |
| 0.5     | 0.52393 | 0.47249 | 0.53844 | 0.5     | 0.56333 |   |
| 0.4918  | 0.36967 | 0       | 0       | 0       | 0       |   |
| 0       | 0       | 0       | 0       | 0       | 0       |   |
| 0       | 0       | 0       | 0       | 0.51907 | 0.39813 |   |
| 0.48489 | 0.49496 | 0.5     | 0.5546  | 0.68236 | 0.44219 |   |
| 0.49204 | 0.5     | 0.45025 | 0.5251  | 0.5     | 0.48606 |   |
| 0.45051 | 0.5     | 0.48729 | 0.5     | 0.45499 | 0.5     |   |
| 0.5664  | 0.63692 | 0.57377 | 0       | 0       | 0       |   |
| 0       | 0       | 0       | 0       | 0       | 0       |   |
| 0       | 0       | 0       | 0       | 0.5     | 0.5761  |   |
| 0.5     | 0.52604 | 0.48049 | 0.46735 | 0.5     | 0.46294 |   |
| 0.46059 | 0.50006 | 0.56186 | 0.5     | 0.49039 | 0.55323 |   |
| 0.49854 | 0.64725 | 0.34576 | 0.5     | 0.52234 | 0.62736 |   |
| 0.47758 | 0       | 0       | 0       | 0       | 0       |   |
| 0       | 0       | 0       | 0       | 0       | 0       |   |
| 0       | 0       | 0       | 0       | 0       | 0.47727 |   |
| 0.5     | 0.31178 | 0.58629 | 0.42237 | 0.51827 | 0.50431 |   |
| 0.47643 | 0.54546 | 0.57789 | 0.5     | 0.46294 | 0.62695 |   |
| 0.5     | 0.65074 | 0.42728 | 0.47263 | 0.51718 | 0.51461 |   |
| 0       | 0       | 0       | 0       | 0       | 0       |   |
| 0       | 0       | 0       | 0       | 0       | 0       |   |
| 0       | 0       | 0       | 0       | 0       | 0.47339 |   |
| 0.6104  | 0.57878 | 0.41417 | 0.61701 | 0.5     | 0.5     |   |





|         |         |         |         |         |         |         |
|---------|---------|---------|---------|---------|---------|---------|
| 0       | 0       | 0       | 0       | 0       | 0       | 0       |
| 0       | 0       | 0.41282 | 0.39558 | 0.5244  | 0.53274 |         |
| 0       | 0       | 0       | 0       | 0       | 0       |         |
| 0       | 0       | 0       | 0       | 0       | 0       |         |
| 0       | 0       | 0       | 1       | 0.50015 | 0.45977 |         |
| 0.5     | 0.52925 | 0.5094  | 0.5127  | 0       | 0       |         |
| 0       | 0       | 0       | 0       | 0       | 0       |         |
| 0       | 0       | 0       | 0       | 0       | 0       |         |
| 0       | 1       | 1       | 0.43585 | 0.5     | 0.43578 |         |
| 0.5     | 0.40273 | 0.48816 | 0.47302 | 0.5     | 0       |         |
| 0       | 0       | 0       | 0       | 0       | 0       |         |
| 0       | 0       | 0       | 0       | 0       | 0       |         |
| 0       | 0       | 1       | 1       | 1       | 0.44424 |         |
| 0.53961 | 0.66462 | 0.48029 |         | 0.5     | 0.5     | 0.44356 |
| 0.48985 | 0.4705  | 0       |         | 0       | 0       | 0       |
| 0       | 0       | 0       | 0       | 0       | 0       |         |
| 0       | 0       | 0       | 0       | 0       | 0       |         |
| 1       | 1       | 1       | 1       | 0.5     | 0.5     |         |
| 0.5     | 0.49636 | 0.58858 | 0.47547 | 0.46117 | 0.42249 |         |
| 0.51549 | 0.43756 |         | 0       | 0       | 0       | 0       |
| 0       | 0       | 0       | 0       | 0       | 0       |         |
| 0       | 0       | 0       | 0       | 0       | 0       |         |
| 1       | 1       | 1       | 1       | 1       | 1       |         |
| 0.54838 | 0.53081 | 0.52692 | 0.47218 | 0.41337 | 0.56947 |         |
| 0.5     | 0.45888 | 0.52024 | 0.62101 | 0       | 0       |         |
| 0       | 0       | 0       | 0       | 0       | 0       |         |
| 0       | 0       | 0       | 0       | 0       | 0       |         |
| 0       | 0       | 0       | 1       | 1       | 1       |         |
| 1       | 1       | 1       | 0.61868 | 0.46033 | 0.43602 |         |
| 0.56537 |         | 0.5     | 0.51411 | 0.53217 | 0.49043 | 0.42125 |
| 0.57588 | 0.48935 |         | 0       | 0       | 0       | 0       |
| 0       | 0       | 0       | 0       | 0       | 0       |         |
| 0       | 0       | 0       | 0       | 0       | 0       |         |
| 0       | 1       | 1       | 1       | 1       | 1       |         |
| 1       | 1       | 0.4253  | 0.63876 | 0.49672 | 0.61216 |         |
| 0.49563 | 0.49817 | 0.48419 |         | 0.5     | 0.5     | 0.5     |
| 0.52247 |         | 0       | 0       | 0       | 0       | 0       |
| 0       | 0       | 0       | 0       | 0       | 0       |         |
| 0       | 0       | 0       | 0       | 0       | 0       |         |
| 0       | 1       | 1       | 1       | 1       | 1       |         |
| 1       | 1       | 0.51605 | 0.59447 | 0.5     | 0.51612 |         |
| 0.5     | 0.63594 | 0.46026 | 0.44853 | 0.51164 | 0.47753 |         |
| 0.5     | 0       | 0       | 0       | 0       | 0       |         |
| 0       | 0       | 0       | 0       | 0       | 0       |         |
| 0       | 0       | 0       | 0       | 0       | 0       |         |
| 0       | 0       | 1       | 1       | 1       | 1       |         |
| 1       | 1       | 1       | 0.51666 | 0.48389 | 0.51993 |         |
| 0.57922 | 0.43131 | 0.54537 | 0.43738 | 0.48801 | 0.4285  |         |
| 0.4292  | 0.52823 | 0.5     | 0       | 0       | 0       | 0       |
| 0       | 0       | 0       | 0       | 0       | 0       |         |
| 0       | 0       | 0       | 0       | 0       | 0       |         |
| 0       | 0       | 0       | 1       | 1       | 1       |         |

|         |         |         |         |         |         |
|---------|---------|---------|---------|---------|---------|
| 1       | 1       | 1       | 1       | 0.55687 | 0.51688 |
| 0.5     | 0.5     | 0.46241 | 0.54225 | 0.61662 | 0.50085 |
| 0.5872  | 0.5326  | 0.54194 | 0.57264 | 0       | 0       |
| 0       | 0       | 0       | 0       | 0       | 0       |
| 0       | 0       | 0       | 0       | 0       | 0       |
| 0       | 0       | 0       | 0       | 1       | 1       |
| 1       | 1       | 1       | 1       | 1       | 1       |
| 1       | 0.49233 | 0.55627 | 0.54556 | 0.58362 | 0.48665 |
| 0.54403 | 0.5     | 0.5     | 0.62562 | 0.5     | 0.46805 |
| 0       | 0       | 0       | 0       | 0       | 0       |
| 0       | 0       | 0       | 0       | 0       | 0       |
| 0       | 0       | 0       | 0       | 0       | 0       |
| 1       | 1       | 1       | 1       | 1       | 1       |
| 1       | 1       | 1       | 0.43836 | 0.50494 | 0.33333 |
| 0.31375 | 0.36362 | 0.49499 | 0.33276 | 0.33333 | 0.33333 |
| 0.33729 | 0.34223 | 0       | 0       | 0       | 0       |
| 0       | 0       | 0       | 0       | 0       | 0       |
| 0       | 0       | 0       | 0       | 0       | 0       |
| 0       | 0       | 1       | 1       | 1       | 1       |
| 1       | 1       | 1       | 1       | 1       | 0.50322 |
| 0.32547 | 0.24596 | 0.33333 | 0.33333 | 0.34335 | 0.4012  |
| 0.27484 | 0.18083 | 0.33333 | 0.31598 | 0       | 0       |
| 0       | 0       | 0       | 0       | 0       | 0       |
| 0       | 0       | 0       | 0       | 0       | 0       |
| 0       | 0       | 0       | 0       | 1       | 1       |
| 1       | 1       | 1       | 1       | 1       | 0.54291 |
| 0.55845 | 0.50453 | 0.25412 | 0.42419 | 0.33333 | 0.27971 |
| 0.31954 | 0.33333 | 0.35688 | 0.33333 | 0.34106 | 0.33201 |
| 0       | 0       | 0       | 0       | 0       | 0       |
| 0       | 0       | 0       | 0       | 0       | 0       |
| 0       | 0       | 0       | 0       | 0       | 0       |
| 1       | 1       | 1       | 1       | 1       | 1       |
| 0.47047 | 0.63003 | 0.43232 | 0.55338 | 0.41957 | 0.34926 |
| 0.32257 | 0.33421 | 0.19337 | 0.33333 | 0.33333 | 0.33333 |
| 0.33333 | 0.36291 | 0       | 0       | 0       | 0       |
| 0       | 0       | 0       | 0       | 0       | 0       |
| 0       | 0       | 0       | 0       | 0       | 0       |
| 0       | 0       | 1       | 1       | 1       | 1       |
| 1       | 0.5     | 0.50339 | 0.58901 | 0.5     | 0.5     |
| 0.48105 | 0.36987 | 0.32374 | 0.35171 | 0.34184 | 0.29234 |
| 0.42321 | 0.32396 | 0.30453 | 0.19727 | 0       | 0       |
| 0       | 0       | 0       | 0       | 0       | 0       |
| 0       | 0       | 0       | 0       | 0       | 0       |
| 0       | 0       | 0       | 0       | 1       | 1       |
| 1       | 0.40755 | 0.5     | 0.5141  | 0.40943 | 0.42188 |
| 0.47245 | 0.45095 | 0.50828 | 0.37226 | 0.33304 | 0.22598 |
| 0.33333 | 0.29938 | 0.3651  | 0.35006 | 0.37908 | 0.33459 |
| 0       | 0       | 0       | 0       | 0       | 0       |
| 0       | 0       | 0       | 0       | 0       | 0       |
| 0       | 0       | 0       | 0       | 0       | 0       |
| 1       | 0.5     | 0.5     | 0.5     | 0.51219 | 0.5097  |
| 0.47768 | 0.5     | 0.5     | 0.5     | 0.55898 | 0.33333 |
|         |         |         |         |         | 0.32302 |

|         |         |         |         |         |         |
|---------|---------|---------|---------|---------|---------|
| 0.35544 | 0.29301 | 0.39754 | 0.35725 | 0.36154 | 0.35125 |
| 0.28066 | 0       | 0       | 0       | 0       | 0       |
| 0       | 0       | 0       | 0       | 0       | 0       |
| 0       | 0       | 0       | 0       | 0       | 0       |
| 0       | 0.5     | 0.398   | 0.5     | 0.5     | 0.5     |
| 0.47529 | 0.5     | 0.5     | 0.31702 | 0.59166 | 0.33333 |
| 0.35236 | 0.38319 | 0.33443 | 0.22708 | 0.34088 | 0.30316 |
| 0.3537  | 0.39698 | 0       | 0       | 0       | 0       |
| 0       | 0       | 0       | 0       | 0       | 0       |
| 0       | 0       | 0       | 0       | 0       | 0       |
| 0       | 0       | 0.64531 | 0.49428 | 0.49189 | 0.49794 |
| 0.67696 | 0.54946 | 0.48656 | 0.5     | 0.34112 | 0.53646 |
| 0.34893 | 0.33333 | 0.31335 | 0.29204 | 0.35637 | 0.38105 |
| 0.33875 | 0.31587 | 0       | 0       | 0       | 0       |
| 0       | 0       | 0       | 0       | 0       | 0       |
| 0       | 0       | 0       | 0       | 0       | 0       |
| 0       | 0       | 0       | 0.54685 | 0.37702 | 0.54897 |
| 0.51432 | 0.48121 | 0.57954 | 0.45335 | 0.45441 | 0.46498 |
| 0.5     | 0.32168 | 0.3558  | 0.34265 | 0.2781  | 0.35095 |
| 0.23284 | 0.31632 | 0.33689 | 0       | 0       | 0       |
| 0       | 0       | 0       | 0       | 0       | 0       |
| 0       | 0       | 0       | 0       | 0       | 0       |
| 0       | 0       | 0       | 0       | 0       | 0.58458 |
| 0.37994 | 0.44837 | 0.5     | 0.43484 | 0.48254 | 0.5     |
| 0.44211 | 0.59117 | 0.40081 | 0.28429 | 0.32577 | 0.29642 |
| 0.32054 | 0.33333 | 0       | 0       | 0       | 0       |
| 0       | 0       | 0       | 0       | 0       | 0       |
| 0       | 0       | 0       | 0       | 0       | 0       |
| 0       | 0       | 0       | 0       | 0       | 0       |
| 0.49035 | 0.47602 | 0.5     | 0.54767 | 0.53027 | 0.48932 |
| 0.49853 | 0.46035 | 0.5     | 0.33333 | 0.33909 | 0.36325 |
| 0       | 0       | 0       | 0       | 0       | 0       |
| 0       | 0       | 0       | 0       | 0       | 0       |
| 0       | 0       | 0       | 0       | 0       | 0       |
| 0       | 0       | 0       | 0       | 0       | 0       |
| 0       | 0       | 0.5     | 0.37386 | 0.5     | 0.4814  |
| 0.4444  | 0.64901 | 0.58674 | 0.29517 | 0       | 0       |
| 0       | 0       | 0       | 0       | 0       | 0       |
| 0       | 0       | 0       | 0       | 0       | 0       |
| 0       | 0       | 0       | 0       | 0       | 0       |
| 0       | 0       | 0       | 0       | 0       | 0       |
| 0       | 0       | 0       | 0.54815 | 0.34312 | 0.5     |
| 0.5118  | 0.4549  | 0       | 0       | 0       | 0       |
| 0       | 0       | 0       | 0       | 0       | 0       |
| 0       | 0       | 0       | 0       | 0       | 0       |
| 0       | 0       | 0       | 0       | 0       | 0       |
| 0       | 0       | 0       | 0       | 0       | 0       |
| 0       | 0       | 0       | 0       | 0       | 0.5     |
| 0.5     | 0       | 0       | 0       | 0       | 0       |
| 0       | 0       | 0       | 0       | 0       | 0       |
| 0       | 0       | 0       | 0       | 0       | 0       |
| 0       | 0       | 0       | 0       | 0       | 0       |



0            0            0            0            0            0  
0

gtTCf=

0  
0.11925  
0.14534  
0.13574  
0.11593  
0.096197  
0.079948  
0.067704  
0.058926  
0.052819  
0.048646  
0.045817  
0.043898  
0.042582  
0.041662  
0.040998  
0.040498  
0.040102

gtTCs=

0  
0.1431  
0.20732  
0.22864  
0.22778  
0.21648  
0.20118  
0.18528  
0.17042  
0.1573  
0.14609  
0.13672  
0.12898  
0.12264  
0.11746  
0.11324  
0.10979  
0.10696

gtTCp=

0  
2.385  
1.5979  
1.1196  
0.8287  
0.65143  
0.54309  
0.47655

0.43538  
0.4096  
0.39316  
0.38239  
0.37506  
0.36982  
0.36585  
0.36266  
0.35995  
0.35753

X\_mask=

2.2204e-016, 2.2204e-016, 2.2204e-016, 0.00051671, 0.0003141, 2.2204e-016, 0.00020454, 0.0016283, 2.2204e-016, 0.0002678, 8.4213e-005, 0.00021968, 0.0032482, 0.0045197, 2.2204e-016, 0.0011855, 2.2204e-016, 0.0019774, 2.2204e-016, 2.2204e-016, 0.004405, 0.0069356, 0.0062076, 2.2204e-016, 0.00035969, 0.00045389, 0.0012096, 0.00037244, 0.00060047, 0.001562, 0.010299, 0.0015948, 2.2204e-016, 2.2204e-016, 0.00096143, 0.002141, 2.2204e-016, 0.0012562, 0.00052372, 2.2204e-016, 2.2204e-016, 2.2204e-016, 2.2204e-016, 0.011048, 0.0011994, 0.020024, 0.0014159, 2.2204e-016, 0.00044991, 2.2204e-016, 2.2204e-016, 2.2204e-016, 0.0028047, 2.2204e-016, 0.00083912, 2.2204e-016, 0.0030664, 2.2204e-016, 0.001533, 0.0019084, 2.2204e-016, 2.2204e-016, 0.018467, 0.0096016, 2.2204e-016, 2.2204e-016, 2.2204e-016, 0.0017811, 0.0028746, 2.2204e-016, 0.0073668, 2.2204e-016, 0.002956, 2.2204e-016, 2.2204e-016, 2.2204e-016, 0.0014451, 0.00087104, 2.2204e-016, 2.2204e-016, 0.0013974, 0.00039639, 6.2174e-005, 2.2204e-016, 0.00098209, 2.2204e-016, 0.026559, 0.0091723, 2.2204e-016, 0.0068396, 0.0022733, 2.2204e-016, 2.2204e-016, 0.0026838, 2.2204e-016, 2.2204e-016, 2.2204e-016, 0.011663, 2.2204e-016, 0.00041559, 0.0022909, 4.4461e-005, 0.00020385, 2.2204e-016, 0.0017171, 2.2204e-016, 0.0016671, 2.2204e-016, 3.7616e-005, 0.00022179, 0.00092531, 0.00090166, 2.2204e-016, 0.0011275, 0.022733, 0.0033475, 2.2204e-016, 0.004034, 0.0063121, 2.2204e-016, 0.0064056, 0.011996, 0.01888, 0.0048235, 2.2204e-016, 2.2204e-016, 2.2204e-016, 0.0046123, 0.00053984, 2.2204e-016, 2.2204e-016, 0.00020818, 2.2204e-016, 0.0032261, 0.00017491, 0.0015175, 0.0034247, 2.2204e-016, 0.0020931, 2.2204e-016, 2.2204e-016, 0.0010657, 2.2204e-016, 2.2204e-016, 0.0042052, 2.2204e-016, 2.2204e-016, 2.2204e-016, 2.2204e-016, 0.014355, 0.007624, 2.2204e-016, 2.2204e-016, 2.2204e-016, 0.0029145, 0.0026345, 2.2204e-016, 0.012163, 0.0052289, 2.2204e-016, 2.2204e-016, 9.1036e-005, 2.2204e-016, 2.2204e-016, 2.2204e-016, 0.0013782, 0.00013622, 0.0024655, 0.00033919, 2.2204e-016, 0.00037332, 2.2204e-016, 2.2204e-016, 0.00053628, 2.2204e-016, 0.0011444, 2.2204e-016, 0.021004, 2.2204e-016, 2.2204e-016, 2.2204e-016, 0.0062771, 2.2204e-016, 0.014331, 0.0039946, 0.01436, 0.0020554, 0.005452, 2.2204e-016, 2.2204e-016, 2.2204e-016, 2.2204e-016, 2.2204e-016, 2.2204e-016, 0.0025663, 0.00075181, 2.2204e-016, 2.2204e-016, 0.0010332, 2.2204e-016

016,2.2204e-016,2.2204e-016,0.00052307,2.2204e-016,2.2204e-  
016,0.00033015,2.2204e-016,2.2204e-016,0.0002323,2.2204e-016,2.2204e-  
016,2.2204e-016,2.2204e-016,0.00051587,2.2204e-016,0.0013243,2.2204e-  
016,2.2204e-016,0.0079149,2.2204e-016,2.2204e-016,2.2204e-  
016,0.0026268,0.0062338,0.0012893,2.2204e-016,2.2204e-  
016,0.00026509,0.00024477,2.2204e-016,2.2204e-016,2.2204e-  
016,0.00189,2.2204e-016,2.2204e-016,2.2204e-  
016,0.0017767,0.00082054,0.00049591,2.2204e-016,2.2204e-016,2.2204e-  
016,2.2204e-016,2.2204e-  
016,0.00011756,0.0018004,0.0019584,0.019552,2.2204e-  
016,0.0013379,2.2204e-016,2.2204e-  
016,0.018198,0.0050892,0.0059996,0.002184,2.2204e-  
016,0.015014,0.0060088,0.0091089,0.00076189,0.0014109,0.0081696,0.0162  
05,2.2204e-016,0.00021396,0.0013947,2.2204e-016,2.2204e-  
016,0.0028881,0.0017443,0.0028953,2.2204e-016,2.2204e-016,2.2204e-  
016,2.2204e-016,0.00025304,0.0003497,2.2204e-016,2.2204e-  
016,0.00062507,2.2204e-016,2.2204e-016,2.2204e-016,0.0022379,2.2204e-  
016,0.031274,0.013318,0.0047576,2.2204e-  
016,0.0020044,0.0003809,2.2204e-016,2.2204e-016,0.018081,2.2204e-  
016,2.2204e-016,0.0019741,0.0089569,0.0099673,2.2204e-016,2.2204e-  
016,0.00094139,2.2204e-016,2.2204e-016,2.2204e-  
016,0.00014043,0.00054061,2.2204e-016,2.2204e-016,2.2204e-016,2.2204e-  
016,2.2204e-016,0.00012511,0.00075049,2.2204e-016,2.2204e-016,2.2204e-  
016,2.2204e-016,0.0011225,0.0013636,0.023431,2.2204e-  
016,0.0029379,2.2204e-016,0.0028744,0.0022071,2.2204e-  
016,0.00013686,0.012835,0.0079659,0.0021581,0.0030393,2.2204e-  
016,0.011839,2.2204e-016,2.2204e-  
016,0.00040309,0.0098072,0.0039579,2.2204e-016,0.00014946,2.2204e-  
016,0.0015055,2.2204e-  
016,0.00046427,0.001168,0.0002478,0.0023886,0.0009271,2.2204e-  
016,1.0898e-005,2.2204e-016,2.2204e-016,2.2204e-  
016,0.0016177,0.00037293,0.0011638,2.2204e-016,2.2204e-  
016,0.010231,2.2204e-016,0.019386,0.0035105,0.0099908,2.2204e-  
016,2.2204e-016,0.0017232,0.0054723,2.2204e-016,2.2204e-  
016,0.015324,0.008908,0.0031012,0.001948,2.2204e-016,2.2204e-  
016,0.010546,0.00032736,0.00024866,0.0011102,0.0014153,0.00064573,0.00  
11887,0.0012034,2.2204e-016,2.2204e-016,9.1825e-  
005,0.00020587,2.2204e-016,0.00053944,2.2204e-  
016,0.00037642,0.00092321,2.2204e-016,0.0017817,2.2204e-  
016,0.035993,2.2204e-016,2.2204e-016,0.00084128,2.2204e-016,2.2204e-  
016,0.013944,2.2204e-016,2.2204e-016,0.023493,2.2204e-  
016,0.010589,0.0065774,2.2204e-016,0.0045141,2.2204e-016,2.2204e-  
016,0.0047993,0.0040461,0.00053901,1.3303e-  
005,0.0012111,0.00068201,0.0011032,0.001234,2.2204e-016,2.2204e-  
016,2.2204e-016,8.2398e-  
005,0.0014466,0.00029498,0.00093004,0.0013711,0.00094123,2.2204e-  
016,2.2204e-016,2.2204e-016,2.2204e-016,2.2204e-  
016,0.026009,0.020522,0.0055209,0.031739,0.015435,2.2204e-  
016,0.020708,2.2204e-016,2.2204e-016,2.2204e-016,0.0003719,2.2204e-  
016,2.2204e-016,0.0020175,0.0062523,2.2204e-016,2.2204e-  
016,0.0042974,0.0013473,0.00036074,0.0010581,2.2204e-016,2.2204e-  
016,2.2204e-016,0.0017254,2.2204e-016,0.0023545,2.2204e-



016,0.00099679,2.2204e-016,0.00072633,0.00091845,2.2204e-  
016,0.00093541,0.0012129,0.0014126,0.026462,2.2204e-016,2.2204e-  
016,2.2204e-016,2.2204e-  
016,0.035234,0.022313,0.00054314,0.0030644,2.2204e-016,2.2204e-  
016,0.0088107,0.0033107,2.2204e-016,2.2204e-  
016,0.014491,0.0054831,2.2204e-016,2.2204e-016,0.0056761,2.2204e-  
016,2.2204e-016,2.2204e-016,0.0002435,2.2204e-016,0.0028299,2.2204e-  
016,0.0018134,2.2204e-016,0.00059367,0.00041431,0.00049682,2.2204e-  
016,0.0018726,2.2204e-016,2.2204e-016,2.2204e-016,2.2204e-  
016,0.0065483,2.2204e-016,2.2204e-016,2.2204e-016,0.012521,2.2204e-  
016,2.2204e-016,0.0047367,2.2204e-  
016,0.0040927,0.013832,0.010721,0.00068952,0.013688,2.2204e-  
016,2.2204e-016,0.0034096,2.2204e-016,0.0059422,0.0018641,2.2204e-  
016,2.2204e-016,0.00045904,0.00071033,2.2204e-  
016,0.00067306,0.00061978,0.00035625,2.2204e-016,0.00023729,2.2204e-  
016,0.0015403,2.2204e-016,0.0027463,2.2204e-016,0.00030726,2.2204e-  
016,0.0018759,2.2204e-016,2.2204e-  
016,0.0020997,0.0020315,0.0094509,2.2204e-016,0.015278,4.8284e-  
005,0.0054622,0.0047919,0.010024,0.0024723,2.2204e-  
016,0.0010529,2.2204e-016,0.0047634,0.014206,0.0029291,6.5703e-  
005,0.0013316,2.2204e-016,0.00019877,2.2204e-016,0.00069064,2.2204e-  
016,2.2204e-016,2.2204e-016,2.2204e-016,2.2204e-016,2.2204e-  
016,0.0010086,2.2204e-016,0.0021016,2.2204e-  
016,0.00054799,0.002387,2.2204e-  
016,0.00258,0.012486,0.0022559,0.0026075,0.0081287,0.01029,0.019605,0.  
011532,0.0021805,0.021547,2.2204e-016,2.2204e-  
016,0.014216,0.0055701,2.2204e-016,2.2204e-016,2.2204e-016,2.2204e-  
016,0.0018955,0.00098283,2.2204e-016,0.0018467,2.2204e-  
016,0.0020058,2.2204e-016,9.6447e-005,2.2204e-016,2.2204e-  
016,0.0005109,2.2204e-016,0.0015544,0.0013035,2.2204e-016,2.2204e-  
016,2.2204e-  
016,0.00084176,0.0015854,0.0014681,0.0013939,0.026447,2.2204e-  
016,2.2204e-016,2.2204e-016,0.011455,2.2204e-016,0.0049703,2.2204e-  
016,0.005593,0.0066293,2.2204e-  
016,0.00082752,0.0037466,0.0040158,0.012632,0.0042657,0.00045893,2.220  
4e-016,2.2204e-016,2.2204e-016,2.2204e-016,2.2204e-016,2.2204e-  
016,2.2204e-016,2.2204e-016,2.2204e-  
016,0.00095553,0.00060411,0.0012327,0.00063439,2.2204e-  
016,0.00036616,2.2204e-016,0.00048234,2.2204e-016,2.2204e-016,2.2204e-  
016,0.027648,0.0026124,0.0043083,0.0075243,2.2204e-  
016,0.00021927,0.013017,2.2204e-016,2.2204e-016,2.2204e-016,2.2204e-  
016,0.0026992,2.2204e-016,2.2204e-016,2.2204e-016,2.2204e-016,2.2204e-  
016,2.2204e-016,0.003764,0.00044585,2.2204e-016,2.2204e-016,2.2204e-  
016,0.00044162,2.2204e-016,8.9902e-005,2.2204e-  
016,0.00070782,0.00053517,9.6209e-005,0.0013147,0.0010597,2.2204e-  
016,0.001918,2.2204e-016,0.00059402,0.00050298,2.2204e-016,2.2204e-  
016,2.2204e-016,0.00031023,2.2204e-016,2.2204e-016,0.0053735,2.2204e-  
016,0.011115,0.010272,0.0071295,2.2204e-016,2.2204e-  
016,0.0076386,2.2204e-016,0.0078787,0.0080695,0.0023507,2.2204e-  
016,2.2204e-016,2.2204e-016,0.0010966,0.0043936,2.2204e-016,2.2204e-  
016,2.2204e-016,2.2204e-016,3.9533e-005,2.2204e-  
016,0.00028555,2.2204e-016,2.2204e-016,2.2204e-016,2.2204e-

016,0.00012965,0.00094759,2.2204e-016,2.2204e-016,2.2204e-  
016,0.013126,2.2204e-016,0.0076889,2.2204e-016,2.2204e-  
016,0.010963,2.2204e-016,0.010534,2.2204e-016,2.2204e-016,2.2204e-  
016,2.2204e-016,2.2204e-016,2.2204e-016,2.2204e-016,2.2204e-  
016,0.00069155,2.2204e-016,0.0013716,2.2204e-016,2.2204e-  
016,0.00017181,2.2204e-016,0.0016867,2.2204e-  
016,0.00024586,0.0023821,0.002382,0.00073564,2.2204e-016,2.2204e-  
016,2.2204e-016,0.0013266,2.2204e-016,2.2204e-  
016,0.00023007,0.012811,5.4216e-  
005,0.0012831,0.010278,0.0010389,2.2204e-  
016,0.0024512,0.0062807,2.2204e-  
016,0.0045922,0.0035801,0.0026682,0.0034427,0.0088698,2.2204e-  
016,0.0013828,2.2204e-016,0.0003726,2.2204e-016,2.2204e-016,2.2204e-  
016,0.0020876,0.00057999,0.00012159,0.0021885,2.2204e-  
016,0.0017211,0.0007229,2.2204e-  
016,0.0024311,0.0026075,0.00063139,0.00027216,2.2204e-  
016,0.00064972,0.0008911,2.2204e-016,0.003874,0.00037371,2.2204e-  
016,2.2204e-016,2.2204e-016,2.2204e-016,0.010119,0.0030326,2.2204e-  
016,2.2204e-016,2.2204e-016,0.0040868,2.2204e-  
016,0.00028963,0.0036683,2.2204e-016,0.00074124,2.2204e-016,2.2204e-  
016,2.2204e-016,0.00011935,0.0002032,2.2204e-016,2.2204e-016,2.2204e-  
016,2.2204e-016,2.2204e-016,2.2204e-016,2.2204e-016,0.0012942,1.3013e-  
006,0.0006977,2.2204e-016,2.2204e-016,0.0015519,2.2204e-016,2.2204e-  
016,2.2204e-016,2.2204e-016,2.2204e-016,2.2204e-  
016,0.0048894,0.0060432,2.2204e-016,0.010028,2.2204e-  
016,0.0014373,2.2204e-016,0.00069995,2.2204e-016,0.00097302,8.8239e-  
005,0.0015073,0.0011401,0.0010664,2.2204e-016,2.2204e-  
016,0.0017946,2.2204e-016,2.2204e-016,0.0017561,2.2204e-016,2.2204e-  
016,0.00099699,2.2204e-016,2.2204e-016,2.2204e-016,0.000179,2.2204e-  
016,2.2204e-016,0.00070792,2.2204e-016,4.414e-  
005,0.00053718,0.00067448,2.2204e-  
016,0.0023277,0.0034201,0.0056896,0.011628,0.0002116,0.0010477,3.1393e-  
-005,0.00046937,0.00025863,2.2204e-016,2.2204e-  
016,0.00057848,0.00052462,0.0017001,0.00015544,0.0015186,2.2204e-  
016,0.00077038,0.0021794,2.2204e-016,0.0014743,0.00010837,2.2204e-  
016,2.2204e-016,2.2204e-016,2.2204e-016,2.2204e-016,2.2204e-  
016,0.0013008,0.0007472,2.2204e-016,0.0011882,0.00033795,2.2204e-  
016,5.9193e-005,2.2204e-016,2.2204e-016,8.2962e-005,0.022254,2.2204e-  
016,2.2204e-016,2.2204e-016,2.2204e-016,2.2204e-  
016,0.0021888,0.00033817,0.0021434,2.2204e-016,2.2204e-  
016,0.0012318,0.0032418,0.0014983,2.2204e-016,0.001785,2.2204e-  
016,0.00045206,2.2204e-016,2.2204e-016,0.0010127,2.2204e-  
016,0.0032074,2.2204e-016,2.2204e-016,2.2204e-016,2.2204e-016,2.2204e-  
016,2.2204e-  
016,0.001504,0.00096606,0.001094,0.00022228,0.00029246,2.2204e-  
016,2.2204e-016,0.00081296,0.00081927,0.00053954,2.2204e-016,2.2204e-  
016,0.00064269,0.0015287,0.00023742,2.2204e-016,2.2204e-  
016,0.0005918,0.001376,2.2204e-016,2.2204e-016,2.2204e-016,2.2204e-  
016,2.2204e-016,2.2204e-016,2.2204e-016,0.0014931,0.00054125,2.2204e-  
016,2.2204e-016,2.2204e-016,2.2204e-  
016,0.00093979,0.00062147,0.0014747,2.2204e-  
016,0.0016359,0.0020714,2.2204e-016,0.0020138,0.00077335,2.2204e-

016,0.0016942,2.2204e-016,2.2204e-016,0.00033419,2.2204e-016,2.2204e-016,2.2204e-016,2.2204e-016,2.2204e-016,2.2204e-016,2.2204e-016,2.2204e-016,2.2204e-016,0.0025662,2.2204e-016,2.2204e-016,0.0021332,0.00015705,2.2204e-016,2.2204e-016,0.00036561,2.2204e-016,2.2204e-016,0.00033141,0.0020482,0.001164,0.0025125,2.2204e-016,0.0023422,2.2204e-016,0.0012138,0.0023053,2.2204e-016,0.00072222,0.0017805,0.00046197,0.00057021,0.0007284,0.00062458,0.0021096,2.2204e-016,2.2204e-016,2.2204e-016,0.00054815,2.2204e-016,2.2204e-016,0.00038096,0.0011122,0.0018369,0.0014177,2.2204e-016,2.2204e-016,2.2204e-016,2.2204e-016,2.2204e-016,2.2204e-016,2.2204e-016,2.2204e-016,2.2204e-016,0.00063791,0.0013679,2.2204e-016,2.2204e-016,2.2204e-016,0.0011791,2.2204e-016,0.00066753,2.2204e-016,2.2204e-016,2.2204e-016,2.2204e-016,0.0010101,2.2204e-016,2.2204e-016,2.2204e-016,0.00055189,0.0011704,2.2204e-016,0.0019247,0.00071739,2.2204e-016,0.002632,0.0011017,2.2204e-016,9.5125e-005,2.2204e-016,2.2204e-016,2.2204e-016,2.2204e-016,0.00047851,2.2204e-016,0.00050061,2.2204e-016,2.2204e-016,0.0011408,0.0019003,2.2204e-016,0.002453,2.2204e-016,0.002733,2.2204e-016,1.7831e-006,0.00063782,0.0017773,2.2204e-016,0.00031583,2.2204e-016,0.00022689,0.0010074,2.2204e-016,2.2204e-016,0.00084171,0.00023669,2.2204e-016,0.00011176,2.2204e-016,0.0021256,2.2204e-016,0.0012978,2.2204e-016,2.2204e-016,0.00082602,2.2204e-016,0.00040183,2.2204e-016,2.2204e-016,0.0026616,3.6176e-005,2.2204e-016,2.2204e-016,0.0013835,0.0004792,2.2204e-016,2.2204e-016,2.2204e-016,0.0020428,0.00026012,2.2204e-016,2.2204e-016,0.00067804,0.00010434,2.2204e-016,0.0019243,2.2204e-016,0.0010921,0.00018752,2.2204e-016,0.0013363,0.00079758,3.3805e-005,0.00014607,2.2204e-016,2.2204e-016,2.2204e-016,0.00096258,2.2204e-016,0.00064239,0.001962,2.2204e-016,2.2204e-016,0.00088445,2.2204e-016,2.2204e-016,0.00025924,8.4057e-005,2.2204e-016,2.2204e-016,0.00062127,0.00023458,0.0002896,2.2204e-016,0.0024875,0.00061491,0.00015776,2.2204e-016,0.00058154,2.2204e-016,2.2204e-016,0.00014907,2.2204e-016,0.0014638,0.000243,2.2204e-016,0.00048778,0.0016949,0.0011273,2.2204e-016,2.2204e-016,0.0015676,2.2204e-016,0.00017979,2.2204e-016,0.0014074,0.0015464,0.0010906,2.2204e-016,0.00088741,0.00048552,0.0022507,0.00034765,0.00088268,0.0027742,4.2218e-005,0.0017667,2.2204e-016,2.2204e-016,0.00031067,0.00069044,0.0002172,2.2204e-016,2.2204e-016,2.2204e-016,0.00079795,0.00023623,2.2204e-016,2.2204e-016,0.002464,2.2204e-016,5.7644e-005,2.2204e-016,0.0019655,0.0022966,0.00015528,0.0028992,2.2204e-016,0.00093048,2.2204e-016,0.0028541,2.2204e-016,2.2204e-016,2.2204e-016,2.2204e-016,2.2204e-016,2.2204e-016,2.2204e-016,0.00057071,2.2204e-016,2.2204e-016,0.0011252,2.2204e-016,0.00023694,2.2204e-016,0.0018977,0.0017066,0.0008456,0.00038782,2.2204e-016,2.2204e-016,0.0034671,0.00013268,7.3592e-005,2.2204e-016,0.0014058,9.8779e-005,0.0019838,0.001234,0.001502,2.2204e-016,0.000467,2.2204e-016,0.0011357,2.2204e-016,2.2204e-016,2.2204e-016,1.0963e-005,2.2204e-016,0.00027605,0.00021926,2.2204e-016,2.2204e-016,2.2204e-016

0.14066,0.13855,0.1434,0.14395,0.14312,0.14281,0.14309,0.14374,0.14374  
,0.14305,0.14277,0.14297,0.14583,0.14629,0.14122,0.14429,0.14062,0.144  
85,0.14042,0.14285,1.073,1.0349,1.3227,1.3343,0.1438,0.14259,0.14248,0  
.14316,0.14512,0.1445,0.14337,0.14534,0.14258,0.14123,0.14312,0.14634,  
0.14313,0.14454,0.14391,2.3941,1.2595,1.1663,1.2524,1.3468,1.2796,1.30  
44,0.14384,0.14325,0.14399,0.14015,0.13949,0.14361,0.14536,0.14229,0.1  
4434,0.14077,0.14498,0.14245,0.1438,0.14547,0.14135,2.3273,2.3959,1.12  
48,1.2482,1.1249,1.2599,1.0474,1.2389,1.1984,1.2707,0.1433,0.14476,0.1  
4191,0.14305,0.14253,0.14445,0.14335,0.14042,0.14086,0.14496,0.14402,0  
.14433,0.1431,0.14455,0.14168,2.4029,2.3858,2.3633,1.1505,1.3531,1.610  
6,1.2157,1.2604,1.249,1.1253,1.239,1.2093,0.14208,0.14341,0.14546,0.14  
31,0.14484,0.14384,0.14323,0.14135,0.14528,0.13913,0.14261,0.14361,0.1  
4308,0.14509,0.14273,0.14495,2.4042,2.4015,2.3627,2.3895,1.2676,1.2444  
,1.2675,1.2657,1.472,1.2088,1.1607,1.0825,1.2969,1.128,0.14299,0.14152  
,0.14372,0.14268,0.1431,0.1458,0.14204,0.1448,0.14784,0.14119,0.14556,  
0.143,0.14137,0.14238,0.14122,0.14092,2.3745,2.3992,2.383,2.3376,2.380  
2,2.3988,1.3705,1.3363,1.3215,1.2011,1.0735,1.4262,1.2551,1.1872,1.310  
7,1.5364,0.14152,0.14445,0.14121,0.13995,0.14069,0.14404,0.14342,0.145  
73,0.14337,0.13846,0.14323,0.14249,0.1419,0.1441,0.14135,0.14452,0.140  
1,2.4069,2.358,2.3792,2.3783,2.4012,2.3511,1.5461,1.185,1.1406,1.4113,  
1.2707,1.2858,1.3396,1.2328,1.0729,1.4378,1.2261,0.14677,0.14373,0.142  
21,0.14304,0.14271,0.1431,0.14368,0.14263,0.14397,0.14304,0.14394,0.14  
36,0.13983,0.12963,0.13121,0.13077,0.14108,2.374,2.3829,2.3934,2.3785,  
2.3933,2.3602,2.3478,1.1101,1.5625,1.2519,1.5088,1.2599,1.2611,1.226,1  
.2622,1.2524,1.2683,1.3124,0.14168,0.1423,0.1415,0.14399,0.14029,0.141  
52,0.14185,0.1454,0.14377,0.14375,0.14339,0.13069,0.13106,0.13012,0.12  
854,0.13146,0.13383,0.14537,2.4081,2.3629,2.3889,2.3667,2.3654,2.403,2  
.3967,1.3081,1.4877,1.2645,1.311,1.2747,1.5861,1.1746,1.1503,1.3033,1.  
236,1.2612,0.14179,0.14594,0.14136,0.14202,0.14505,0.14297,0.14486,0.1  
4051,0.14135,0.12847,0.1306,0.13103,0.13027,0.13027,0.12991,0.13257,0.  
12978,0.12794,0.14102,2.3833,2.3634,2.4034,2.3899,2.3884,2.3826,2.3849  
,1.3093,1.2223,1.304,1.4574,1.107,1.3536,1.1253,1.2367,1.1111,1.1058,1  
.3282,1.2694,0.14436,0.1415,0.14304,0.1431,0.14342,0.14195,0.13133,0.1  
312,0.13241,0.12858,0.13167,0.13123,0.12612,0.12745,0.12826,0.12869,0.  
12993,0.13429,2.4026,2.3391,2.3893,2.3825,2.3843,2.3736,2.3731,1.3902,  
1.3109,1.2691,1.2611,1.1828,1.3481,1.5423,1.2569,1.4486,1.3388,1.3799,  
1.4259,0.14206,0.14382,0.14133,0.13272,0.12507,0.13174,0.13054,0.13061  
,0.1348,0.13243,0.12977,0.13137,0.12542,0.13121,0.1309,0.13264,0.13081  
,0.13192,2.3622,2.3661,2.3981,2.3759,2.4099,2.384,2.3818,2.3718,2.3801  
,1.2511,1.3982,1.3521,1.4499,1.2453,1.3659,1.2696,1.2728,1.5437,1.261,  
1.2043,0.13261,0.131,0.13058,0.13195,0.13405,0.13223,0.13165,0.13052,0  
.12935,0.13115,0.13136,0.13299,0.132,0.13065,0.12996,0.13331,0.12979,0  
.13317,2.3422,2.4263,2.3715,2.3696,2.3664,2.3691,2.375,2.4047,2.3659,1  
.1295,1.2967,0.87974,0.84876,0.95879,1.2281,0.8855,0.86891,0.8767,0.89  
227,0.90337,0.13122,0.13112,0.13445,0.1325,0.1315,0.13223,0.13065,0.13  
075,0.13092,0.13011,0.13083,0.1302,0.13288,0.13048,0.13248,0.13033,0.1  
2983,0.12843,2.3594,2.3816,2.4079,2.3903,2.367,2.4097,2.4032,2.3673,2.  
4056,1.2516,0.86321,0.68811,0.88018,0.87842,0.8927,1.0348,0.75806,0.53  
711,0.87571,0.84866,0.13359,0.13401,0.13283,0.12861,0.12831,0.13182,0.  
13521,0.13032,0.13375,0.13253,0.12723,0.12894,0.1306,0.13102,0.12876,0  
.13124,0.13123,0.13229,2.4111,2.3717,2.3797,2.3697,2.36,2.4158,2.4035,  
1.3504,1.3905,1.2501,0.6991,1.0932,0.8892,0.75924,0.83992,0.89514,0.94

124,0.88206,0.90215,0.88842,0.12914,0.12953,0.13254,0.13056,0.1316,0.13345,0.12866,0.13128,0.13065,0.13115,0.13132,0.1322,0.12926,0.13716,0.12937,0.13109,0.12942,0.13292,2.3988,2.3404,2.3623,2.3967,2.4089,2.3711,1.1743,1.5525,1.0951,1.3861,1.0885,0.9274,0.86021,0.90145,0.56501,0.88485,0.88847,0.88015,0.88993,0.94695,0.1271,0.12984,0.13418,0.13017,0.13067,0.13348,0.13062,0.1325,0.12942,0.13766,0.1319,0.13598,0.12941,0.13232,0.12546,0.13149,0.12809,0.13165,2.383,2.378,2.3834,2.3853,2.4029,1.2458,1.2745,1.4514,1.2535,1.2583,1.2132,0.9643,0.85187,0.92659,0.90158,0.79111,1.1007,0.86163,0.81446,0.57608,0.12928,0.13338,0.1333,0.1312,0.1306,0.12917,0.12967,0.13039,0.12953,0.12985,0.13278,0.13055,0.13376,0.12785,0.13255,0.133,0.13056,0.13797,2.4,2.3913,2.3775,1.0525,1.265,1.3046,1.0632,1.0793,1.2125,1.1385,1.2662,0.97982,0.88246,0.63754,0.88186,0.79849,0.95085,0.92396,0.99014,0.89005,0.13562,0.13129,0.1332,0.13119,0.13277,0.12969,0.13032,0.13111,0.13215,0.13361,0.13327,0.12652,0.12986,0.13027,0.13026,0.1325,0.1328,0.13173,2.4135,1.2363,1.2454,1.2521,1.2832,1.2736,1.1956,1.2308,1.2492,1.3867,0.87713,0.85671,0.93526,0.79142,1.0366,0.93878,0.94444,0.91591,0.76141,0.13001,0.13128,0.12879,0.12828,0.13013,0.13027,0.12882,0.13499,0.13392,0.13278,0.13133,0.1299,0.13282,0.13155,0.13108,0.12987,0.13111,0.1194,1.2764,1.0235,1.2537,1.2583,1.2388,1.1887,1.2633,1.2374,0.82692,1.4451,0.88089,0.92157,0.99029,0.88118,0.63978,0.90071,0.81667,0.93129,1.0256,0.1314,0.12651,0.13104,0.13044,0.1369,0.12589,0.13264,0.13026,0.1318,0.13364,0.13119,0.13339,0.13266,0.13159,0.13481,0.1297,0.13196,0.12033,1.5885,1.2364,1.2222,1.2435,1.6476,1.3521,1.2194,1.2521,0.90349,1.3453,0.92553,0.87702,0.83379,0.79502,0.92818,0.99546,0.90428,0.84013,0.13111,0.1312,0.13003,0.13487,0.13677,0.12753,0.12892,0.12994,0.12758,0.13405,0.12952,0.13213,0.13111,0.1296,0.13112,0.12996,0.1299,0.13112,0.11907,1.3533,0.97004,1.3738,1.2801,1.2194,1.422,1.1474,1.1595,1.1734,1.2601,0.8538,0.92585,0.9113,0.74652,0.92035,0.65501,0.84065,0.88825,0.13121,0.12985,0.13313,0.13091,0.13044,0.1303,0.12864,0.13137,0.12994,0.13131,0.13321,0.13435,0.12888,0.13017,0.13036,0.12984,0.13393,0.11903,0.11872,0.11978,1.4536,0.97795,1.1397,1.2686,1.1008,1.2061,1.2482,1.1267,1.4606,1.037,0.77559,0.86392,0.80157,0.86307,0.87841,0.13174,0.13247,0.13006,0.13111,0.13038,0.12892,0.13376,0.12949,0.13042,0.131,0.13061,0.13268,0.13412,0.13053,0.13499,0.13407,0.13108,0.13232,0.11754,0.11974,0.11985,0.11924,1.2257,1.1953,1.2537,1.3599,1.3099,1.2257,1.2579,1.1605,1.2336,0.88107,0.89703,0.94882,0.13172,0.13114,0.13941,0.13244,0.13272,0.13083,0.12998,0.12984,0.13241,0.13202,0.12898,0.12936,0.1296,0.13081,0.13053,0.13085,0.1316,0.13525,0.13115,0.1292,0.11692,0.11855,0.12093,0.11954,0.11837,0.11778,1.2535,0.94711,1.2406,1.2057,1.1297,1.5818,1.46,0.78289,0.13312,0.12533,0.13058,0.13063,0.13217,0.13262,0.13769,0.13036,0.1317,0.1295,0.12804,0.13363,0.12872,0.12843,0.1305,0.12892,0.12926,0.13282,0.12927,0.12958,0.13063,0.13482,0.13322,0.11807,0.11945,0.11857,0.11892,0.11952,0.11904,1.3545,0.89564,1.2548,1.2786,1.1585,0.11886,0.12039,0.13059,0.13394,0.1318,0.13097,0.12895,0.13139,0.13189,0.13097,0.1317,0.1326,0.13188,0.13143,0.13335,0.13107,0.1319,0.13481,0.12561,0.12922,0.13202,0.13272,0.12973,0.11721,0.12068,0.12023,0.11772,0.12026,0.11902,0.11864,0.11929,0.11617,0.1186,1.2545,1.2742,0.1173,0.118,0.11861,0.11844,0.12952,0.13263,0.12717,0.13484,0.12848,0.13123,0.13192,0.13317,0.13297,0.13222,0.13235,0.13036,0.13476,0.13053,0.13378,0.12874,0.12828,0.13428,0.12881,0.11902,0.11812,0.11846,0.11883,0.11778,0.12032,0.12027,0.12004,0.11975,0.11931,0.11698,0.11872,0.12031,0.11923,0.11928

,0.11885,0.11836,0.13069,0.13615,0.13286,0.12709,0.13308,0.13169,0.13185,0.13117,0.12872,0.13245,0.12805,0.13048,0.13108,0.13118,0.13555,0.13232,0.11847,0.11899,0.11605,0.1193,0.11964,0.11945,0.12038,0.119,0.1205,0.12116,0.11874,0.12189,0.11892,0.11818,0.12114,0.11811,0.11714,0.11951,0.11722,0.13009,0.13096,0.1296,0.12865,0.12949,0.13125,0.13326,0.1304,0.13068,0.13163,0.12974,0.1296,0.13053,0.11935,0.11668,0.11993,0.12027,0.12132,0.12065,0.12099,0.11904,0.1213,0.11988,0.11998,0.12033,0.11752,0.11955,0.121,0.12053,0.11945,0.12074,0.11923,0.12061,0.11862,0.13096,0.13336,0.13351,0.12861,0.12974,0.13251,0.13315,0.13416,0.13289,0.1179,0.11784,0.11861,0.11762,0.11834,0.11879,0.1195,0.1185,0.1195,0.11944,0.12079,0.11848,0.11792,0.11799,0.12063,0.11891,0.12148,0.1173,0.11939,0.11931,0.1178,0.11955,0.11885,0.11913,0.11806,0.12916,0.13378,0.12865,0.13373,0.1197,0.11822,0.12151,0.12031,0.118,0.11957,0.11937,0.11885,0.11927,0.11861,0.12119,0.11836,0.12014,0.11709,0.11869,0.12021,0.12017,0.11818,0.12136,0.11825,0.12212,0.11891,0.12015,0.11963,0.12126,0.11672,0.11942,0.11704,0.11933,0.12053,0.11776,0.11987,0.11979,0.1196,0.1181,0.11796,0.11774,0.12155,0.11732,0.12066,0.11899,0.11834,0.12053,0.1187,0.11984,0.11768,0.11886,0.12152,0.11935,0.11762,0.11761,0.12072,0.12002,0.11704,0.11912,0.11769,0.1211,0.11943,0.11783,0.11929,0.12023,0.12011,0.11622,0.12102,0.11872,0.11926,0.11953,0.11833,0.11988,0.1205,0.11857,0.11853,0.11919,0.11812,0.11973,0.12008,0.11877,0.12029,0.12014,0.11767,0.11735,0.12121,0.11873,0.11788,0.12046,0.11989,0.11774,0.11849,0.11972,0.11938,0.11864,0.11917,0.12141,0.11937,0.11897,0.11723,0.12034,0.1193,0.1174,0.11845,0.11848,0.12027,0.11923,0.11777,0.11941,0.12104,0.11949,0.11847,0.1192,0.12006,0.11877,0.11893,0.11685,0.12037,0.12053,0.12027,0.11907,0.11999,0.12007,0.12161,0.1197,0.12039,0.12225,0.11986,0.12077,0.11892,0.11755,0.11928,0.11919,0.11781,0.11806,0.11867,0.11806,0.12007,0.11979,0.1182,0.11987,0.12228,0.11823,0.11976,0.11862,0.12148,0.12137,0.11965,0.12147,0.11788,0.11996,0.11953,0.12098,0.11926,0.11824,0.11782,0.11736,0.11919,0.11831,0.11859,0.1196,0.11839,0.11756,0.12032,0.11804,0.11826,0.12065,0.11935,0.11897,0.11949,0.12027,0.12154,0.11994,0.12012,0.12008,0.11885,0.1234,0.11924,0.11867,0.11677,0.1206,0.11901,0.12135,0.12119,0.12129,0.11853,0.11929,0.11823,0.12022,0.12004,0.11761,0.11733,0.11914,0.12073,0.11876,0.11886,0.11894,0.11904,0.1176  
0.20581,0.20174,0.2079,0.20857,0.20758,0.208,0.20774,0.20869,0.20696,0.20713,0.20799,0.20853,0.20966,0.2104,0.20495,0.20877,0.20547,0.20971,0.20367,0.20726,0.78322,0.76457,0.93876,0.94392,0.20844,0.20774,0.20516,0.20668,0.21006,0.20917,0.20876,0.21046,0.20627,0.20568,0.20839,0.20975,0.20746,0.2098,0.20689,1.5987,0.89771,0.84305,0.89121,0.95934,0.9158,0.92018,0.20739,0.20761,0.20739,0.20386,0.20379,0.20751,0.20893,0.20698,0.20923,0.20577,0.20926,0.20742,0.20914,0.20969,0.20696,1.5515,1.611,0.82027,0.88922,0.82279,0.89686,0.7732,0.88503,0.86392,0.90681,0.20708,0.20976,0.20718,0.20635,0.20711,0.20912,0.20788,0.20489,0.20432,0.20983,0.20818,0.20806,0.20704,0.20899,0.20534,1.6168,1.6011,1.5852,0.84254,0.96137,1.1179,0.86822,0.89398,0.89233,0.80826,0.89328,0.87498,0.20868,0.20782,0.20908,0.20634,0.20762,0.20885,0.20756,0.20655,0.20863,0.20309,0.20766,0.20736,0.20768,0.21029,0.20503,0.21019,1.6114,1.6089,1.5765,1.5965,0.90095,0.88515,0.90704,0.91026,1.0291,0.86232,0.83527,0.79143,0.9236,0.81873,0.20654,0.20648,0.20943,0.20754,0.20838,0.21036,0.20739,0.20804,0.21106,0.20595,0.20997,0.20699,0.20565,0.20678,0.20516,0.20581,1.6006,1.6134,1.5948,1.5559,1.59,1.611,0.96222,0.94191,0.94

1, 0.86943, 0.78799, 1.0065, 0.89618, 0.8659, 0.93595, 1.0685, 0.20614, 0.20784, 0.20627, 0.20407, 0.20536, 0.2098, 0.2069, 0.2095, 0.20696, 0.20429, 0.20865, 0.2065, 0.20689, 0.20805, 0.20492, 0.20807, 0.20497, 1.62, 1.5781, 1.5879, 1.5955, 1.6082, 1.5557, 1.091, 0.85431, 0.83284, 0.9913, 0.90565, 0.91325, 0.95275, 0.88241, 0.7799, 1.0104, 0.87432, 0.21008, 0.20734, 0.20741, 0.20745, 0.20663, 0.20578, 0.20853, 0.20852, 0.20861, 0.20738, 0.20833, 0.20866, 0.20369, 0.17242, 0.1767, 0.17802, 0.20587, 1.5895, 1.5895, 1.5958, 1.5938, 1.6128, 1.5834, 1.5654, 0.81283, 1.0866, 0.89873, 1.0494, 0.90669, 0.90356, 0.87569, 0.89565, 0.89102, 0.90517, 0.93453, 0.20539, 0.20733, 0.20574, 0.20873, 0.20559, 0.20585, 0.20649, 0.20954, 0.20697, 0.20931, 0.20848, 0.17508, 0.1802, 0.17591, 0.1727, 0.17665, 0.17609, 0.20955, 1.6287, 1.5696, 1.5917, 1.5878, 1.5976, 1.6123, 1.618, 0.93419, 1.047, 0.91085, 0.93125, 0.91223, 1.107, 0.8496, 0.83795, 0.92704, 0.89412, 0.89769, 0.20671, 0.21039, 0.20585, 0.20533, 0.20966, 0.20598, 0.20824, 0.20462, 0.20609, 0.1735, 0.17813, 0.17404, 0.17339, 0.17554, 0.17379, 0.179, 0.17437, 0.17225, 0.20649, 1.5875, 1.5767, 1.6094, 1.6044, 1.61, 1.6009, 1.5852, 0.93137, 0.87614, 0.93096, 1.0148, 0.80642, 0.95263, 0.81596, 0.89319, 0.81108, 0.80313, 0.93518, 0.90491, 0.20769, 0.20617, 0.20732, 0.20792, 0.20671, 0.20558, 0.17587, 0.17741, 0.18182, 0.17176, 0.17694, 0.17646, 0.16817, 0.16791, 0.17128, 0.17422, 0.17269, 0.1794, 1.6213, 1.551, 1.6059, 1.5981, 1.5958, 1.5914, 1.5941, 0.98474, 0.93246, 0.90169, 0.90482, 0.85348, 0.94358, 1.0736, 0.89318, 1.0276, 0.95549, 0.9846, 1.0109, 0.20596, 0.2083, 0.20705, 0.17861, 0.16379, 0.17648, 0.17032, 0.17635, 0.18129, 0.17848, 0.17488, 0.17599, 0.16883, 0.17504, 0.17649, 0.17615, 0.1756, 0.17642, 1.5802, 1.5823, 1.6097, 1.5819, 1.6276, 1.5964, 1.5909, 1.5782, 1.5901, 0.89704, 0.98867, 0.94466, 1.0235, 0.88934, 0.96303, 0.91208, 0.91287, 1.0798, 0.90444, 0.87122, 0.1776, 0.17364, 0.17537, 0.17587, 0.18126, 0.17714, 0.17436, 0.17554, 0.17549, 0.17576, 0.17786, 0.18283, 0.17514, 0.17683, 0.17251, 0.17868, 0.17182, 0.17893, 1.5605, 1.64, 1.577, 1.5882, 1.595, 1.5789, 1.5735, 1.6283, 1.5598, 0.8234, 0.92738, 0.64844, 0.62941, 0.69191, 0.85606, 0.64615, 0.63984, 0.64396, 0.65972, 0.66347, 0.17669, 0.17601, 0.1813, 0.17656, 0.17648, 0.17709, 0.17634, 0.17726, 0.17607, 0.17589, 0.17509, 0.17456, 0.18118, 0.17253, 0.17735, 0.17479, 0.17455, 0.17369, 1.5648, 1.5876, 1.6323, 1.6158, 1.5759, 1.6241, 1.6119, 1.5753, 1.608, 0.87239, 0.63918, 0.53002, 0.65032, 0.64175, 0.65579, 0.73886, 0.56962, 0.42986, 0.64094, 0.63377, 0.17844, 0.18089, 0.1804, 0.17262, 0.17011, 0.17849, 0.18383, 0.17532, 0.17916, 0.1792, 0.16363, 0.17473, 0.17592, 0.17717, 0.17395, 0.17583, 0.17679, 0.17737, 1.6368, 1.5899, 1.6101, 1.5843, 1.5748, 1.6349, 1.6067, 0.93443, 0.96235, 0.86939, 0.53802, 0.79116, 0.65035, 0.57161, 0.62527, 0.66078, 0.68944, 0.6481, 0.6654, 0.66221, 0.17392, 0.17579, 0.18241, 0.17697, 0.1782, 0.17942, 0.17476, 0.17442, 0.17497, 0.17593, 0.17661, 0.17816, 0.17368, 0.18692, 0.17209, 0.17685, 0.17661, 0.18311, 1.6054, 1.5556, 1.5756, 1.5928, 1.611, 1.5742, 0.81588, 1.0736, 0.7728, 0.95855, 0.77446, 0.68291, 0.63437, 0.66642, 0.45064, 0.65142, 0.65751, 0.64429, 0.6634, 0.68466, 0.17113, 0.17387, 0.18227, 0.17477, 0.17609, 0.18216, 0.17434, 0.17822, 0.17013, 0.19101, 0.17827, 0.18457, 0.17546, 0.17614, 0.16833, 0.17467, 0.17389, 0.17752, 1.6081, 1.6014, 1.5907, 1.6046, 1.6214, 0.86918, 0.89737, 0.98655, 0.86847, 0.88256, 0.84613, 0.69949, 0.63058, 0.67668, 0.65793, 0.58951, 0.78948, 0.63402, 0.60643, 0.45756, 0.17313, 0.17998, 0.18424, 0.17371, 0.17684, 0.17414, 0.17368, 0.17556, 0.17708, 0.17577, 0.17867, 0.17655, 0.17847, 0.17146, 0.1793, 0.17753, 0.17673, 0.19134, 1.5949, 1.6074, 1.5857, 0.74004, 0.89194, 0.91447, 0.75375, 0.76566, 0.85746, 0.79992, 0.87393, 0.7099, 0.65317, 0.49098, 0.65337, 0.58868, 0.68939, 0.68218, 0.7206, 0.65479, 0.18363, 0.17703, 0.17845, 0.17619, 0.17754, 0.17612, 0.17505, 0.17461, 0.17719, 0.17987, 0.17834, 0.16834, 0.17554, 0.17627, 0.17577, 0.17705, 0.17937, 0.17761, 1.6271, 0.8607

6,0.85929,0.8814,0.89617,0.88284,0.83416,0.84334,0.86886,0.95947,0.647  
33,0.63408,0.68483,0.58908,0.74603,0.67876,0.68763,0.66689,0.58026,0.1  
7394,0.17596,0.17082,0.1714,0.17627,0.17627,0.17249,0.18327,0.18036,0.  
17893,0.1737,0.17634,0.17888,0.17628,0.17586,0.17531,0.17567,0.14571,0.  
.8926,0.72693,0.86921,0.88156,0.85901,0.82854,0.88556,0.85498,0.59642,  
0.98399,0.6471,0.6722,0.71861,0.64676,0.49417,0.66461,0.61209,0.67797,  
0.74161,0.17551,0.16678,0.17516,0.17671,0.1901,0.16315,0.18159,0.17445  
,0.17698,0.1804,0.17627,0.17832,0.1761,0.17787,0.18213,0.1758,0.17769,  
0.14647,1.0884,0.8635,0.85257,0.8665,1.1274,0.93315,0.85389,0.87103,0.  
65325,0.93902,0.67866,0.64838,0.6176,0.59872,0.67621,0.73109,0.6666,0.  
61841,0.17684,0.1756,0.17308,0.18407,0.18346,0.17138,0.17499,0.17758,0.  
.16733,0.18156,0.17486,0.17696,0.17636,0.17592,0.177,0.17464,0.17463,0.  
.17606,0.14552,0.934,0.69098,0.95178,0.88369,0.85058,0.97568,0.7979,0.  
811,0.8208,0.87693,0.63063,0.68059,0.6735,0.55699,0.67651,0.51033,0.62  
089,0.65275,0.17557,0.17409,0.17934,0.17749,0.17572,0.17395,0.17082,0.  
17518,0.17792,0.17668,0.17824,0.17945,0.17153,0.1743,0.17648,0.17491,0.  
.18032,0.14559,0.14468,0.14555,1.0051,0.69725,0.79518,0.88597,0.77552,  
0.83767,0.8679,0.7932,1.0134,0.74844,0.5828,0.63699,0.59902,0.64582,0.  
64216,0.17642,0.18112,0.17507,0.17736,0.17545,0.17136,0.17803,0.17357,  
0.17587,0.17426,0.17591,0.17886,0.18312,0.1788,0.18264,0.17872,0.17407  
,0.17695,0.1446,0.14569,0.14553,0.14559,0.85112,0.8357,0.87463,0.94762  
,0.90443,0.85698,0.87032,0.81324,0.85107,0.64532,0.66058,0.69622,0.178  
78,0.17592,0.19306,0.18264,0.18026,0.17612,0.17406,0.17512,0.17941,0.1  
7691,0.17399,0.17663,0.17341,0.17662,0.17409,0.17644,0.17726,0.18332,0.  
.17699,0.16981,0.14196,0.14542,0.14738,0.14668,0.14528,0.14445,0.87684  
,0.66909,0.86334,0.83998,0.79567,1.0823,1.0106,0.57257,0.1784,0.16679,  
0.17545,0.17685,0.17689,0.17998,0.18848,0.17216,0.17648,0.17499,0.1711  
,0.18066,0.17502,0.17324,0.17396,0.1739,0.17409,0.17801,0.17248,0.1754  
5,0.17845,0.18542,0.18218,0.14407,0.14574,0.14464,0.1441,0.14626,0.145  
03,0.93083,0.64672,0.87823,0.88332,0.81027,0.14472,0.14586,0.1758,0.18  
309,0.17612,0.17692,0.17314,0.17539,0.17601,0.17586,0.17481,0.17882,0.  
17898,0.17672,0.17732,0.17804,0.17696,0.18613,0.16556,0.17339,0.17791,  
0.18201,0.17402,0.14381,0.14659,0.14522,0.14352,0.14608,0.14529,0.1456  
2,0.14568,0.14269,0.14453,0.87427,0.89156,0.14335,0.1439,0.14539,0.144  
26,0.17358,0.17695,0.16508,0.18375,0.16988,0.17629,0.1775,0.17744,0.17  
995,0.17936,0.17736,0.17518,0.18551,0.17462,0.18467,0.17131,0.17218,0.  
17957,0.17454,0.14505,0.14488,0.14495,0.14473,0.14399,0.14745,0.14683,  
0.1461,0.1451,0.14469,0.14296,0.14424,0.14678,0.14494,0.14515,0.14537,  
0.14437,0.1747,0.18545,0.18167,0.16996,0.18277,0.17706,0.17699,0.17937  
,0.17277,0.1806,0.17299,0.17604,0.17736,0.17971,0.1859,0.17778,0.14399  
,0.14633,0.1436,0.14533,0.14586,0.1453,0.14666,0.14587,0.14581,0.14737  
,0.14508,0.14772,0.14503,0.14446,0.14715,0.14425,0.14272,0.14585,0.143  
28,0.17475,0.17614,0.17527,0.1727,0.17633,0.17611,0.17831,0.17581,0.17  
626,0.17435,0.17158,0.17401,0.17409,0.14546,0.14382,0.14584,0.14671,0.  
14769,0.14704,0.14704,0.14556,0.1471,0.14655,0.14513,0.14651,0.1433,0.  
14576,0.14663,0.14597,0.14579,0.1459,0.14592,0.14686,0.14459,0.17538,0.  
.18542,0.18011,0.17316,0.17219,0.17746,0.17866,0.18225,0.17727,0.14421  
,0.14493,0.14505,0.14432,0.1443,0.14553,0.14499,0.14397,0.14551,0.1448  
8,0.14733,0.14355,0.14355,0.14374,0.14679,0.14552,0.14736,0.1433,0.145  
29,0.14508,0.14531,0.14517,0.14402,0.14539,0.14295,0.17016,0.18095,0.1  
7138,0.17847,0.14492,0.14452,0.14783,0.14647,0.14418,0.14623,0.14466,0.  
.14451,0.14632,0.14475,0.14737,0.1451,0.14625,0.143,0.14487,0.14653,0.



14685,0.14401,0.14788,0.1451,0.14769,0.14533,0.14522,0.14648,0.14744,0.14362,0.14586,0.14273,0.14553,0.14649,0.14496,0.14548,0.14494,0.14569,0.14425,0.14392,0.14452,0.14738,0.14383,0.14658,0.144,0.14436,0.14647,0.14541,0.14462,0.14384,0.14505,0.14801,0.14524,0.14423,0.14285,0.14591,0.1456,0.14317,0.14421,0.14416,0.14768,0.14541,0.14408,0.14551,0.14652,0.14591,0.14162,0.14699,0.14552,0.14533,0.14457,0.14508,0.14576,0.14687,0.14464,0.14465,0.14571,0.14397,0.14687,0.1457,0.14603,0.14716,0.14634,0.14469,0.14334,0.14632,0.14504,0.1449,0.14719,0.14622,0.14407,0.14472,0.14602,0.14612,0.14555,0.14476,0.1473,0.14565,0.14464,0.14342,0.14583,0.14594,0.14328,0.14519,0.14381,0.14674,0.14569,0.1438,0.14542,0.14746,0.14491,0.14474,0.14495,0.14699,0.14529,0.14498,0.14335,0.14702,0.14606,0.14675,0.1447,0.14642,0.14554,0.14739,0.14517,0.14651,0.14815,0.14591,0.14706,0.14505,0.1434,0.14462,0.14502,0.14377,0.14366,0.1442,0.14387,0.14643,0.14522,0.14382,0.14617,0.14791,0.14448,0.14586,0.14435,0.14777,0.14611,0.14595,0.14836,0.14449,0.1463,0.14659,0.14736,0.14535,0.14421,0.14354,0.14369,0.14547,0.14455,0.14498,0.14617,0.1439,0.14393,0.14504,0.14471,0.14393,0.14541,0.14465,0.14476,0.14512,0.1459,0.14727,0.14565,0.14613,0.14577,0.14471,0.14904,0.14572,0.14506,0.14273,0.14727,0.1447,0.14736,0.14632,0.14843,0.14509,0.14563,0.14382,0.14519,0.14522,0.14409,0.14395,0.14557,0.14715,0.14441,0.14497,0.14525,0.1447,0.14508

0.22623,0.22364,0.22712,0.22811,0.22937,0.22939,0.22953,0.22931,0.22886,0.22914,0.22965,0.22887,0.23089,0.23172,0.22613,0.22938,0.2266,0.23002,0.22403,0.22797,0.6007,0.58991,0.68351,0.6977,0.23011,0.22883,0.2262,0.22694,0.22962,0.23093,0.23046,0.23019,0.22752,0.22638,0.22989,0.23053,0.22907,0.23333,0.22774,1.1176,0.67213,0.6363,0.65938,0.7169,0.67929,0.68487,0.22935,0.22801,0.22817,0.22665,0.22602,0.22796,0.22966,0.22858,0.23103,0.22684,0.2307,0.22875,0.23109,0.23124,0.22686,1.0673,1.1385,0.62477,0.66145,0.62988,0.66746,0.594,0.66247,0.64551,0.68235,0.22968,0.22967,0.22812,0.22783,0.22739,0.22962,0.22963,0.22535,0.22596,0.22944,0.2286,0.22864,0.2279,0.2313,0.22591,1.1305,1.1089,1.1094,0.63676,0.70941,0.80607,0.65899,0.66641,0.66641,0.60912,0.67217,0.66231,0.22839,0.22897,0.23138,0.22777,0.22842,0.22945,0.22883,0.2286,0.22881,0.22492,0.22968,0.22817,0.22926,0.23038,0.22716,0.23104,1.1226,1.1261,1.0982,1.106,0.67565,0.6576,0.67963,0.67965,0.75623,0.64332,0.62871,0.60123,0.68355,0.61615,0.22873,0.22828,0.23035,0.22775,0.22916,0.23023,0.22894,0.22998,0.23148,0.22768,0.22954,0.22849,0.22699,0.22776,0.22687,0.22717,1.1314,1.1155,1.1283,1.0754,1.114,1.1337,0.70973,0.69096,0.69969,0.66397,0.60182,0.74425,0.68212,0.65539,0.69449,0.77611,0.22727,0.2283,0.22813,0.22699,0.22713,0.23022,0.22954,0.23084,0.22768,0.2264,0.22922,0.22984,0.22941,0.22947,0.22589,0.22858,0.22616,1.1492,1.0956,1.1034,1.1235,1.1314,1.0701,0.79534,0.64707,0.63307,0.72936,0.68344,0.67817,0.70547,0.65349,0.59407,0.74256,0.65417,0.23041,0.22979,0.22795,0.2278,0.2291,0.22765,0.2306,0.22904,0.23029,0.22879,0.22947,0.22955,0.22437,0.17746,0.18291,0.18645,0.22823,1.1132,1.1104,1.111,1.1128,1.1403,1.1115,1.0835,0.62421,0.79177,0.67567,0.76854,0.67993,0.67287,0.65709,0.6627,0.65967,0.67242,0.69498,0.22588,0.22945,0.22814,0.22978,0.22589,0.22673,0.22847,0.22928,0.22795,0.23143,0.22941,0.1806,0.18925,0.18179,0.17765,0.18177,0.17953,0.23172,1.1336,1.087,1.114,1.107,1.1232,1.1288,1.1354,0.69573,0.77467,0.67375,0.68899,0.67598,0.80752,0.63771,0.63743,0.68536,0.67183,0.67341,0.22813,0.23198,0.22806,0.22613,0.23031,0.22717,0.23015,0.22582,0.22711,0.17921,0.18477,0.17822,0.1769,0.18212,0.

17825,0.18606,0.1801,0.17718,0.22902,1.1194,1.1059,1.1293,1.1151,1.134  
,1.1278,1.1054,0.69656,0.65501,0.69449,0.74342,0.6085,0.70689,0.62028,  
0.67453,0.61424,0.60975,0.69277,0.67825,0.23007,0.22787,0.2284,0.22792  
,0.22785,0.22586,0.18215,0.18248,0.18894,0.17611,0.18257,0.18219,0.172  
74,0.17141,0.17607,0.18013,0.17594,0.18545,1.1456,1.0714,1.1292,1.1197  
,1.1099,1.1209,1.1123,0.7227,0.69282,0.67362,0.67812,0.64135,0.70073,0  
.78659,0.66464,0.75842,0.70452,0.73445,0.75869,0.22805,0.23007,0.23024  
,0.18462,0.16335,0.1819,0.17203,0.18124,0.18779,0.18435,0.1814,0.18126  
,0.17266,0.18021,0.18368,0.1799,0.18245,0.18132,1.1141,1.0981,1.1287,1  
.104,1.1545,1.1214,1.0993,1.0897,1.115,0.6704,0.73018,0.69697,0.75369,  
0.67015,0.72277,0.68392,0.68746,0.78452,0.67863,0.65819,0.18388,0.1781  
1,0.18132,0.18106,0.19069,0.18262,0.17633,0.18343,0.18114,0.18097,0.18  
432,0.19135,0.18004,0.18366,0.17747,0.18448,0.17576,0.18481,1.0858,1.1  
591,1.1049,1.1132,1.1184,1.1014,1.0998,1.1335,1.0851,0.62071,0.6953,0.  
49227,0.48361,0.52,0.61961,0.49391,0.4818,0.48555,0.49767,0.50883,0.18  
217,0.18182,0.18928,0.18243,0.18234,0.18317,0.18181,0.18479,0.18295,0.  
18279,0.18039,0.18016,0.18688,0.17439,0.18344,0.18104,0.18063,0.17926,  
1.0852,1.1052,1.1549,1.1295,1.0978,1.1421,1.1464,1.0993,1.1244,0.6347,  
0.48744,0.42269,0.49738,0.48326,0.4961,0.54899,0.44173,0.34821,0.48219  
,0.48739,0.18316,0.18901,0.18811,0.17771,0.17343,0.18556,0.19209,0.180  
6,0.18448,0.18691,0.16221,0.18073,0.18124,0.18113,0.17975,0.18063,0.18  
208,0.1843,1.146,1.1108,1.1405,1.0996,1.0958,1.1631,1.1121,0.67006,0.6  
9221,0.6218,0.42663,0.59205,0.49463,0.44552,0.47403,0.49896,0.52211,0.  
49318,0.50362,0.5037,0.17866,0.18267,0.18933,0.1855,0.18515,0.1868,0.1  
8085,0.17944,0.18007,0.18207,0.18226,0.18418,0.17912,0.19658,0.17647,0  
.1836,0.18385,0.1941,1.1217,1.0781,1.09,1.1117,1.1424,1.0949,0.5916,0.  
76459,0.56511,0.68852,0.56597,0.52032,0.48505,0.50855,0.36048,0.49319,  
0.49755,0.49091,0.50492,0.51063,0.17432,0.18066,0.19109,0.17904,0.1825  
5,0.18977,0.17883,0.18432,0.17433,0.20358,0.18417,0.19308,0.18147,0.18  
156,0.17266,0.17946,0.18076,0.18353,1.1209,1.1315,1.112,1.1276,1.15,0.  
6288,0.65101,0.70184,0.62598,0.63864,0.61289,0.52706,0.47909,0.5118,0.  
49969,0.45408,0.58615,0.48792,0.46261,0.37169,0.17858,0.18713,0.19499,  
0.17787,0.18291,0.17931,0.18022,0.18075,0.18505,0.18198,0.18562,0.1831  
,0.18438,0.17656,0.18519,0.18473,0.18057,0.20236,1.1207,1.1228,1.1038,  
0.53865,0.64767,0.66162,0.55122,0.55551,0.62272,0.57693,0.6238,0.52992  
,0.50189,0.38917,0.49213,0.4517,0.51878,0.51916,0.53992,0.50238,0.1926  
7,0.183,0.18242,0.18318,0.18352,0.18245,0.18071,0.17819,0.18299,0.1879  
2,0.18407,0.17202,0.18092,0.18263,0.18169,0.18341,0.18602,0.18415,1.14  
08,0.62521,0.61277,0.63931,0.64578,0.63745,0.60298,0.61081,0.63029,0.6  
9076,0.49484,0.48423,0.52072,0.45274,0.55865,0.50564,0.51576,0.5031,0.  
45016,0.17919,0.18213,0.1742,0.17466,0.18174,0.18136,0.1782,0.19233,0.  
18734,0.18485,0.17774,0.18123,0.18514,0.18305,0.18106,0.18176,0.18119,  
0.13619,0.65195,0.53269,0.6307,0.63352,0.62042,0.60191,0.63833,0.59933  
,0.44081,0.70887,0.48897,0.51073,0.52816,0.49699,0.3924,0.4994,0.47208  
,0.50267,0.56034,0.18075,0.16892,0.17919,0.18269,0.20291,0.16296,0.189  
84,0.17991,0.18169,0.188,0.18219,0.18464,0.18054,0.18441,0.18953,0.181  
05,0.18336,0.13675,0.76414,0.62502,0.613,0.62764,0.79284,0.66725,0.619  
71,0.62736,0.4835,0.6753,0.5141,0.49157,0.47502,0.46317,0.50913,0.5499  
6,0.51178,0.47095,0.18263,0.18067,0.1778,0.19175,0.19022,0.17567,0.181  
57,0.18507,0.1686,0.1902,0.18269,0.18451,0.18187,0.18223,0.18169,0.180  
62,0.18184,0.18189,0.13599,0.67892,0.50685,0.69163,0.6336,0.61706,0.69  
38,0.569,0.58318,0.5925,0.63115,0.48216,0.51616,0.51526,0.42598,0.5126

9,0.40302,0.47568,0.50008,0.18083,0.17957,0.18654,0.18309,0.18126,0.17786,0.17508,0.18068,0.18596,0.18274,0.18402,0.18598,0.17554,0.17748,0.18286,0.18096,0.18783,0.13638,0.13454,0.1348,0.71326,0.51363,0.57697,0.63526,0.55788,0.60588,0.62944,0.57423,0.72585,0.55684,0.44593,0.48693,0.46422,0.49952,0.49137,0.18356,0.18979,0.18003,0.18289,0.18268,0.17597,0.18485,0.17629,0.18104,0.17773,0.18183,0.18434,0.19247,0.18717,0.18875,0.18753,0.17888,0.18191,0.13568,0.13642,0.13512,0.13541,0.60804,0.60426,0.62848,0.67634,0.65138,0.62024,0.62427,0.58983,0.60149,0.49009,0.50425,0.52365,0.18673,0.18177,0.20691,0.19215,0.18757,0.18196,0.17796,0.18034,0.18739,0.18326,0.18076,0.18338,0.18001,0.18322,0.17985,0.18423,0.18246,0.19102,0.18134,0.17211,0.13291,0.13543,0.13812,0.137,0.13595,0.13452,0.62428,0.48483,0.62719,0.6042,0.57757,0.77221,0.7213,0.42196,0.18572,0.16963,0.18063,0.18252,0.18217,0.18694,0.19939,0.17575,0.182,0.18089,0.17466,0.18854,0.18048,0.1794,0.17853,0.18026,0.17941,0.18391,0.17646,0.18045,0.18684,0.19572,0.19009,0.1348,0.13658,0.1354,0.13428,0.13641,0.13569,0.66782,0.47682,0.6265,0.63255,0.5913,0.13478,0.13675,0.18128,0.19256,0.18225,0.18313,0.17941,0.17978,0.18233,0.18015,0.17946,0.18424,0.1869,0.1836,0.18206,0.18607,0.1826,0.19643,0.1669,0.18006,0.18452,0.19195,0.17963,0.13473,0.13782,0.13595,0.13332,0.13709,0.13585,0.13573,0.13561,0.1337,0.13539,0.62745,0.65445,0.13405,0.13481,0.13499,0.13452,0.17817,0.18251,0.16537,0.19154,0.17311,0.18264,0.1838,0.18292,0.1873,0.18845,0.18297,0.18032,0.19384,0.18139,0.19451,0.17524,0.17851,0.18478,0.18233,0.13556,0.13598,0.13488,0.13488,0.13444,0.13849,0.13593,0.13702,0.13508,0.13544,0.13368,0.13505,0.13619,0.13581,0.13522,0.13587,0.13475,0.18036,0.19492,0.19012,0.17271,0.19315,0.18261,0.18246,0.18802,0.17706,0.18927,0.17978,0.18162,0.18418,0.18921,0.1955,0.18403,0.13456,0.1366,0.13449,0.13523,0.13669,0.13572,0.13661,0.13619,0.1372,0.13719,0.13469,0.13735,0.13538,0.13475,0.1378,0.13493,0.13277,0.13626,0.13357,0.18059,0.18275,0.18187,0.17653,0.18242,0.18212,0.18476,0.18108,0.18228,0.17697,0.17442,0.17954,0.17997,0.13531,0.13482,0.13604,0.13587,0.13721,0.13746,0.13768,0.13541,0.1368,0.13729,0.13532,0.13673,0.13441,0.13626,0.13698,0.13718,0.13604,0.13631,0.13681,0.13759,0.13451,0.18193,0.19813,0.18734,0.17771,0.17846,0.18377,0.185,0.19078,0.18338,0.13503,0.13488,0.136,0.13458,0.13418,0.13594,0.13603,0.13452,0.13665,0.13551,0.13706,0.13366,0.13439,0.13517,0.13824,0.13649,0.1387,0.13344,0.13542,0.13514,0.13574,0.13606,0.13373,0.13603,0.13272,0.1739,0.18851,0.17708,0.18483,0.13502,0.13485,0.13784,0.13565,0.13547,0.13596,0.13547,0.13398,0.13641,0.1356,0.13679,0.13608,0.13649,0.13461,0.13541,0.13685,0.13715,0.13331,0.1381,0.13581,0.13759,0.13451,0.1361,0.13761,0.13784,0.13393,0.13553,0.13331,0.13549,0.13719,0.13514,0.13573,0.13586,0.13536,0.13413,0.13505,0.13474,0.13701,0.13329,0.13639,0.13445,0.13601,0.1374,0.13566,0.13458,0.13455,0.13466,0.13829,0.13533,0.13482,0.13299,0.13641,0.13626,0.13377,0.13473,0.13491,0.13841,0.13576,0.13435,0.1357,0.13652,0.13571,0.13176,0.13644,0.1358,0.13507,0.13499,0.13558,0.13487,0.13593,0.13509,0.13534,0.13671,0.1342,0.13684,0.13589,0.13569,0.13798,0.13608,0.13528,0.13319,0.13614,0.1346,0.13519,0.13775,0.13691,0.13485,0.13539,0.13687,0.13664,0.13607,0.13542,0.13739,0.13647,0.13506,0.13396,0.13623,0.1364,0.13419,0.13564,0.13444,0.13741,0.13657,0.13487,0.1352,0.1383,0.13478,0.13543,0.13499,0.13757,0.13487,0.13476,0.13464,0.13688,0.13631,0.13774,0.13492,0.13675,0.13528,0.13829,0.13614,0.13628,0.13831,0.13649,0.13707,0.1355,0.13468,0.13547,0.13524,0.13502,0.1348,0.13427,0.13358,0.13725,0.13656,0.13473,0.13614,0.13798,0

.13433,0.13574,0.1349,0.13756,0.13689,0.1365,0.13798,0.1349,0.13714,0.1364,0.13707,0.13533,0.13499,0.13497,0.1341,0.13609,0.13538,0.13583,0.1359,0.13394,0.13523,0.13611,0.13505,0.1345,0.1353,0.13476,0.13484,0.13567,0.13682,0.13738,0.136,0.1359,0.13553,0.13529,0.13848,0.13666,0.1358,0.13312,0.13722,0.13471,0.13806,0.13696,0.13907,0.13548,0.1351,0.13336,0.13639,0.13514,0.13505,0.13481,0.13605,0.13668,0.13516,0.13551,0.13613,0.13663,0.13421  
0.22644,0.22379,0.22801,0.22685,0.22819,0.2288,0.22767,0.23005,0.22832,0.22771,0.22869,0.22917,0.2311,0.2298,0.22659,0.22921,0.22588,0.22788,0.22332,0.22651,0.48363,0.47558,0.5259,0.5451,0.22859,0.22813,0.22699,0.22548,0.22764,0.22893,0.23074,0.22929,0.22684,0.22729,0.22909,0.2294,0.22741,0.23274,0.22668,0.82606,0.52389,0.50159,0.52021,0.55475,0.53196,0.5402,0.22825,0.22624,0.22599,0.22538,0.22592,0.22709,0.22936,0.22657,0.23017,0.2264,0.22844,0.22746,0.23071,0.22995,0.2262,0.78842,0.84516,0.49937,0.51473,0.50348,0.51984,0.47875,0.52224,0.51261,0.53192,0.22977,0.22824,0.22785,0.22675,0.22589,0.22933,0.22914,0.2245,0.22566,0.22913,0.22768,0.22747,0.22744,0.23139,0.22663,0.83641,0.82844,0.82119,0.5064,0.55062,0.60662,0.51631,0.52234,0.52177,0.47943,0.5348,0.52575,0.22725,0.22757,0.22844,0.22751,0.22822,0.22883,0.2277,0.22906,0.22799,0.22406,0.228,0.22606,0.22967,0.23,0.22606,0.23042,0.8352,0.82809,0.8038,0.83198,0.52801,0.50995,0.52885,0.53273,0.58769,0.51063,0.49787,0.47791,0.53835,0.48935,0.22928,0.227,0.22841,0.22608,0.22828,0.22648,0.22862,0.22943,0.22956,0.22699,0.22815,0.22713,0.22714,0.22591,0.2268,0.22634,0.83388,0.82251,0.84174,0.80284,0.82985,0.83248,0.55393,0.54134,0.5492,0.52489,0.48479,0.57696,0.53936,0.52,0.54209,0.59753,0.22798,0.22817,0.22814,0.22575,0.22621,0.22913,0.22755,0.22988,0.22541,0.22678,0.2278,0.22858,0.22868,0.22752,0.22568,0.2269,0.22538,0.85087,0.8028,0.81432,0.82934,0.84573,0.78699,0.60839,0.5071,0.50267,0.55725,0.53222,0.52869,0.55673,0.50958,0.47226,0.58319,0.5083,0.22947,0.22912,0.2266,0.22766,0.22808,0.22829,0.22938,0.22819,0.22809,0.22814,0.22848,0.22744,0.22372,0.16587,0.17348,0.17753,0.2263,0.82334,0.83238,0.81521,0.83473,0.85185,0.82388,0.7933,0.49407,0.60573,0.53591,0.59618,0.54077,0.5287,0.51458,0.51318,0.51384,0.52855,0.53676,0.22461,0.22926,0.22776,0.23104,0.22574,0.2272,0.22901,0.22757,0.22689,0.22991,0.22787,0.17075,0.18156,0.1708,0.16706,0.17022,0.16824,0.23054,0.8318,0.80822,0.82988,0.79753,0.83781,0.83017,0.85079,0.54185,0.59721,0.52814,0.53034,0.53158,0.62271,0.49979,0.50698,0.53682,0.5294,0.52386,0.22732,0.2304,0.22875,0.22613,0.22784,0.22437,0.22978,0.22503,0.22639,0.16838,0.17572,0.16677,0.16587,0.17037,0.16729,0.17689,0.17003,0.16492,0.22833,0.82684,0.79817,0.85031,0.81832,0.84728,0.83431,0.81186,0.54635,0.5119,0.54577,0.578,0.48276,0.55622,0.49324,0.53351,0.49079,0.48617,0.53655,0.53089,0.22976,0.22652,0.22846,0.22911,0.22634,0.2254,0.17149,0.17285,0.18106,0.16479,0.17292,0.17092,0.16097,0.15854,0.16604,0.17058,0.16449,0.17635,0.85843,0.79211,0.83346,0.81598,0.82444,0.82871,0.81748,0.55456,0.54812,0.52666,0.53306,0.50596,0.54744,0.60021,0.51495,0.58661,0.54929,0.58175,0.57971,0.22747,0.22786,0.22947,0.17533,0.14999,0.17232,0.15953,0.17057,0.17698,0.17565,0.17077,0.17014,0.16066,0.17049,0.17544,0.16981,0.17225,0.17007,0.82359,0.79706,0.83525,0.82202,0.85687,0.82275,0.80584,0.80157,0.83403,0.53179,0.5716,0.53373,0.58117,0.52181,0.56724,0.53528,0.5372,0.60219,0.52952,0.5234,0.17279,0.16604,0.17007,0.16957,0.18117,0.17283,0.16433,0.17251,0.17149,0.17024,0.17378,0.1819,0.16886,0.17378,0.16567,0.17433,0.16305,0.17415,0.79475,0.86092,0.81784,0.82823

,0.84735,0.81687,0.80719,0.84512,0.79596,0.48796,0.55142,0.39003,0.38641,0.39924,0.47536,0.38773,0.3791,0.38208,0.39071,0.4104,0.17331,0.17257,0.18028,0.1703,0.17178,0.1732,0.17243,0.17448,0.17282,0.17045,0.16921,0.16966,0.17755,0.1627,0.17378,0.17182,0.17045,0.16982,0.80604,0.81636,0.85141,0.84052,0.80227,0.85348,0.85978,0.80005,0.83192,0.47117,0.38534,0.34259,0.39059,0.38221,0.38778,0.42157,0.35951,0.28693,0.37904,0.38719,0.1726,0.17897,0.17822,0.16817,0.16126,0.1749,0.18217,0.17043,0.17352,0.17763,0.14772,0.17152,0.16956,0.17186,0.16927,0.16837,0.17136,0.17334,0.86509,0.8092,0.85876,0.81593,0.80224,0.86121,0.81765,0.50164,0.5235,0.47255,0.34577,0.46628,0.38372,0.36238,0.37437,0.39354,0.41205,0.39276,0.39979,0.40193,0.16828,0.17296,0.18108,0.17634,0.17544,0.17859,0.17037,0.16774,0.16955,0.17233,0.17102,0.17334,0.16861,0.18815,0.16564,0.17317,0.1739,0.1859,0.8376,0.80006,0.80913,0.8116,0.84674,0.80915,0.44916,0.57241,0.42751,0.50944,0.43079,0.41058,0.38472,0.40208,0.29659,0.38929,0.39533,0.39037,0.39944,0.40075,0.16232,0.17044,0.18261,0.16793,0.17214,0.17994,0.16842,0.17423,0.16238,0.19755,0.17351,0.1834,0.17183,0.16962,0.16118,0.16767,0.17005,0.17353,0.83287,0.83707,0.8253,0.82451,0.85729,0.47796,0.48807,0.52855,0.46879,0.4783,0.46135,0.41225,0.38156,0.39984,0.39216,0.3627,0.45424,0.38516,0.36394,0.30395,0.16856,0.17731,0.18831,0.16667,0.17287,0.17042,0.17026,0.17078,0.17503,0.17299,0.17583,0.17404,0.1744,0.16608,0.17449,0.17352,0.16998,0.19436,0.82517,0.83457,0.82153,0.40393,0.48911,0.49737,0.4171,0.42622,0.47565,0.4292,0.46046,0.41358,0.39621,0.31625,0.38856,0.35708,0.40316,0.41692,0.42462,0.39981,0.18313,0.17054,0.17115,0.17423,0.17413,0.17121,0.17003,0.16712,0.17328,0.17786,0.17323,0.15939,0.17105,0.17126,0.17144,0.17313,0.17454,0.17358,0.85112,0.46732,0.45558,0.47803,0.48416,0.48093,0.45371,0.45022,0.48005,0.5205,0.38902,0.38257,0.40818,0.36042,0.43696,0.39318,0.40291,0.39775,0.35842,0.16935,0.17313,0.16264,0.1638,0.17132,0.17096,0.16703,0.18315,0.17723,0.17466,0.16552,0.17171,0.17465,0.17256,0.17057,0.17121,0.17092,0.11638,0.49288,0.40562,0.46992,0.47994,0.47528,0.45477,0.48489,0.44796,0.33837,0.53764,0.38958,0.39899,0.40432,0.39609,0.31709,0.4006,0.37248,0.39089,0.44139,0.16979,0.15489,0.16724,0.17261,0.19614,0.14856,0.18054,0.1697,0.17115,0.17951,0.17128,0.17437,0.17048,0.17358,0.18045,0.1701,0.17339,0.11759,0.56983,0.47096,0.45786,0.46409,0.58862,0.50167,0.46942,0.45987,0.3744,0.50151,0.40971,0.38607,0.37814,0.3663,0.39586,0.43392,0.40478,0.37052,0.17239,0.17004,0.16685,0.18246,0.17996,0.16547,0.16956,0.17555,0.15655,0.18116,0.17399,0.1742,0.1728,0.1712,0.17137,0.17118,0.17163,0.17167,0.11625,0.51357,0.38073,0.51495,0.47468,0.46287,0.50913,0.42667,0.44291,0.44646,0.48125,0.37883,0.40624,0.41331,0.34329,0.40501,0.32956,0.37317,0.3966,0.16913,0.16848,0.17619,0.17179,0.17082,0.16629,0.16464,0.17001,0.17792,0.17246,0.17417,0.1756,0.16286,0.16717,0.17329,0.16994,0.17929,0.11688,0.11538,0.1145,0.53358,0.39647,0.44519,0.4764,0.42,0.45474,0.47208,0.43119,0.5471,0.43416,0.36026,0.38485,0.37228,0.39684,0.38472,0.17165,0.17988,0.16899,0.1723,0.17375,0.16368,0.17361,0.16405,0.17026,0.16587,0.17224,0.17411,0.18516,0.17879,0.17812,0.17751,0.16789,0.17182,0.11643,0.11728,0.11541,0.11636,0.45722,0.4588,0.47175,0.50343,0.4914,0.46532,0.46679,0.44773,0.44161,0.39132,0.40341,0.40993,0.17673,0.17073,0.20128,0.18368,0.17725,0.17226,0.16618,0.16919,0.17781,0.17353,0.17015,0.17517,0.16945,0.17387,0.16835,0.17449,0.17169,0.18206,0.17122,0.15981,0.11291,0.11542,0.11859,0.11818,0.11669,0.11496,0.4596,0.36558,0.47993,0.45687,0.43737,0.57263,0.54623,0.32385,0.17506,0.15806,0.16926,0.17164,0

.17258,0.17842,0.19284,0.16406,0.17163,0.17174,0.1644,0.17873,0.17,0.1  
6885,0.16715,0.16976,0.16891,0.17371,0.16541,0.16968,0.1779,0.18838,0.  
18004,0.1161,0.11649,0.11507,0.11351,0.11716,0.11567,0.50463,0.36432,0  
.47515,0.47875,0.44886,0.11495,0.1161,0.17166,0.18266,0.17089,0.17379,  
0.16926,0.16919,0.1713,0.16881,0.1686,0.17403,0.1775,0.17349,0.17171,0  
.17677,0.17175,0.18878,0.15333,0.17044,0.1742,0.18424,0.16848,0.11516,  
0.1182,0.11539,0.11459,0.11714,0.11546,0.11543,0.11524,0.1143,0.11536,  
0.47317,0.49167,0.11466,0.11576,0.11537,0.11516,0.16828,0.17261,0.1518  
1,0.18199,0.16162,0.17207,0.1739,0.17226,0.17732,0.18064,0.17257,0.169  
23,0.18457,0.17095,0.18807,0.16261,0.16646,0.17395,0.17261,0.11621,0.1  
1668,0.11526,0.11499,0.1155,0.11776,0.11617,0.11662,0.11462,0.11648,0.  
1143,0.11514,0.11675,0.11525,0.1155,0.11677,0.11544,0.1695,0.18609,0.1  
8068,0.16202,0.18551,0.17123,0.17266,0.17825,0.1654,0.18139,0.17,0.170  
59,0.17312,0.18188,0.18838,0.1749,0.11418,0.11811,0.11494,0.11532,0.11  
626,0.11529,0.11722,0.11562,0.11725,0.11776,0.11569,0.11727,0.1159,0.1  
1509,0.11741,0.11611,0.11281,0.11666,0.11393,0.17053,0.17149,0.17218,0  
.1644,0.17219,0.17169,0.17505,0.17094,0.1729,0.16463,0.16296,0.16887,0  
.16844,0.11573,0.11507,0.1162,0.11571,0.11687,0.11765,0.11759,0.11554,  
0.11763,0.11671,0.11521,0.11661,0.11521,0.11739,0.11735,0.11664,0.1152  
,0.11568,0.11799,0.11824,0.11588,0.17153,0.19089,0.17816,0.16872,0.167  
57,0.1729,0.17514,0.18132,0.17276,0.11481,0.11486,0.11545,0.11454,0.11  
424,0.11602,0.11643,0.11582,0.11748,0.11625,0.11735,0.11343,0.1144,0.1  
1601,0.11958,0.11605,0.11767,0.11424,0.1159,0.11447,0.1162,0.11646,0.1  
1373,0.11588,0.11286,0.16268,0.17906,0.16477,0.17479,0.11547,0.11536,0  
.11782,0.11595,0.11503,0.1157,0.11534,0.11444,0.11666,0.11525,0.11727,  
0.11603,0.11591,0.11476,0.11498,0.11777,0.11706,0.11404,0.11797,0.1147  
4,0.11813,0.11528,0.1154,0.1188,0.11782,0.11363,0.11528,0.11389,0.1171  
,0.11799,0.11525,0.11558,0.11628,0.11535,0.11438,0.11578,0.11478,0.117  
35,0.11279,0.11689,0.11553,0.11659,0.11773,0.11691,0.11443,0.11483,0.1  
1452,0.11757,0.11591,0.11494,0.11275,0.11625,0.11595,0.11442,0.11498,0  
.11701,0.11799,0.11534,0.11393,0.11507,0.11698,0.11687,0.11258,0.11623  
,0.11609,0.1145,0.11472,0.11632,0.11575,0.11621,0.11569,0.11595,0.1165  
4,0.1149,0.11684,0.11638,0.11568,0.11851,0.11737,0.11552,0.113,0.11623  
,0.11523,0.11491,0.11733,0.11672,0.11515,0.11542,0.11656,0.11655,0.116  
21,0.11642,0.11746,0.11728,0.11566,0.1141,0.11638,0.1162,0.11429,0.115  
48,0.11542,0.11801,0.11636,0.1145,0.11572,0.11795,0.11484,0.11587,0.11  
564,0.11787,0.11471,0.11519,0.11464,0.11667,0.11664,0.1179,0.11635,0.1  
1659,0.11584,0.11802,0.11629,0.11701,0.11934,0.1158,0.1173,0.11597,0.1  
1595,0.11582,0.11545,0.11607,0.11533,0.11469,0.11345,0.11847,0.11668,0  
.1151,0.11686,0.11797,0.11453,0.11604,0.11615,0.117,0.11677,0.11633,0.  
11725,0.11577,0.11655,0.11593,0.11629,0.11507,0.11579,0.11502,0.11462,  
0.11608,0.1165,0.1158,0.11579,0.11392,0.11517,0.11706,0.1148,0.11603,0  
.11508,0.11481,0.11435,0.1161,0.11678,0.11801,0.11563,0.1159,0.11457,0  
.11509,0.1173,0.11653,0.11554,0.11318,0.11804,0.11449,0.11848,0.11666,  
0.11876,0.11597,0.11579,0.1139,0.11644,0.11497,0.11439,0.11456,0.1151,  
0.11569,0.11474,0.11491,0.11743,0.11629,0.11525  
0.21566,0.21316,0.217,0.21536,0.21665,0.21824,0.21607,0.21921,0.21549,  
0.21717,0.21728,0.21647,0.21918,0.21877,0.21508,0.21799,0.21497,0.2175  
2,0.21233,0.21307,0.39838,0.39962,0.43148,0.45163,0.2163,0.21692,0.215  
68,0.21518,0.21494,0.21681,0.21875,0.21836,0.21613,0.21562,0.21765,0.2  
1906,0.2148,0.22134,0.21526,0.65891,0.42675,0.42056,0.42871,0.45598,0.  
42954,0.44093,0.21754,0.21574,0.21513,0.2141,0.21362,0.21708,0.21866,0

.21625,0.21803,0.21401,0.21729,0.21762,0.21877,0.21852,0.21444,0.62223  
,0.6459,0.41416,0.42036,0.41934,0.42727,0.40659,0.43128,0.41894,0.4356  
3,0.21903,0.21628,0.21709,0.21513,0.21488,0.2179,0.21763,0.2145,0.2151  
3,0.21566,0.21669,0.21676,0.21423,0.21921,0.21605,0.66835,0.65348,0.65  
57,0.42371,0.4459,0.49622,0.41806,0.43198,0.42334,0.39919,0.44013,0.43  
233,0.21585,0.21653,0.21634,0.21718,0.21719,0.21749,0.21645,0.21735,0.  
21611,0.21336,0.21403,0.21377,0.21897,0.21906,0.21595,0.21963,0.65904,  
0.64907,0.61228,0.65456,0.43863,0.41712,0.43144,0.43768,0.47057,0.4191  
9,0.41018,0.39428,0.4426,0.40807,0.21789,0.2165,0.21693,0.21462,0.2164  
2,0.21524,0.21755,0.21754,0.2175,0.21754,0.21639,0.21619,0.21548,0.214  
68,0.21546,0.21472,0.66037,0.66441,0.66795,0.62568,0.65442,0.66341,0.4  
4768,0.44648,0.44821,0.4299,0.40796,0.46236,0.44793,0.43181,0.44644,0.  
48639,0.21683,0.21539,0.21729,0.2141,0.21583,0.21862,0.2167,0.21785,0.  
21373,0.21446,0.21666,0.21789,0.21713,0.21592,0.21527,0.21685,0.21552,  
0.67104,0.61047,0.64674,0.65553,0.66943,0.62246,0.48639,0.42073,0.4178  
7,0.45933,0.43027,0.43673,0.46097,0.41655,0.39425,0.4725,0.41759,0.217  
69,0.21719,0.21391,0.21569,0.21601,0.2175,0.2175,0.21745,0.21694,0.216  
01,0.21818,0.21699,0.21141,0.14889,0.1579,0.16357,0.21527,0.65614,0.64  
728,0.61748,0.66804,0.66419,0.65716,0.62417,0.41252,0.49623,0.43711,0.  
48845,0.44603,0.43324,0.41358,0.41865,0.4234,0.43491,0.44122,0.21497,0.  
.21885,0.21689,0.22009,0.2146,0.21651,0.21884,0.2177,0.21653,0.2184,0.  
2156,0.15382,0.16716,0.1566,0.15166,0.1547,0.15301,0.21915,0.6429,0.63  
866,0.6547,0.62622,0.65325,0.65839,0.68572,0.44494,0.48404,0.43233,0.4  
3214,0.43331,0.5047,0.41706,0.42003,0.4448,0.43784,0.43024,0.21554,0.2  
1796,0.21772,0.21547,0.2172,0.2144,0.21835,0.21407,0.21441,0.15361,0.1  
6035,0.15015,0.14987,0.1555,0.15222,0.16121,0.15497,0.14842,0.21584,0.  
64323,0.61992,0.66513,0.64693,0.67745,0.64716,0.62527,0.45359,0.42557,  
0.45223,0.46683,0.40099,0.45629,0.40459,0.43762,0.40848,0.39807,0.4366  
,0.43382,0.21826,0.21578,0.21726,0.21678,0.21545,0.21356,0.15767,0.157  
46,0.16545,0.1485,0.15762,0.15661,0.14603,0.14108,0.15063,0.156,0.1496  
8,0.16086,0.658,0.60789,0.6563,0.64583,0.63888,0.64921,0.62311,0.45411  
,0.4497,0.42979,0.43521,0.42368,0.44389,0.48806,0.42135,0.47654,0.4570  
7,0.47233,0.47815,0.21656,0.21467,0.21787,0.15997,0.13298,0.15623,0.14  
255,0.15535,0.16111,0.1603,0.15507,0.15378,0.14395,0.15473,0.1607,0.15  
429,0.15691,0.15553,0.64934,0.61782,0.6435,0.63934,0.6785,0.65338,0.63  
859,0.61943,0.65921,0.43765,0.4686,0.44156,0.47134,0.42848,0.46325,0.4  
4284,0.44331,0.49366,0.43935,0.43496,0.15766,0.14901,0.1551,0.1543,0.1  
6699,0.15756,0.14852,0.15753,0.1568,0.15599,0.15866,0.16826,0.15286,0.  
15789,0.15075,0.15881,0.14735,0.15877,0.63416,0.68916,0.63518,0.6528,0.  
.67659,0.64915,0.63127,0.65326,0.62126,0.40424,0.45826,0.31615,0.31881  
,0.31831,0.38158,0.31585,0.31268,0.31148,0.31577,0.33712,0.15715,0.157  
92,0.16589,0.15501,0.15599,0.15668,0.15647,0.15821,0.1585,0.15431,0.15  
387,0.15447,0.16159,0.14666,0.15907,0.15582,0.15505,0.15431,0.62844,0.  
63875,0.67864,0.6636,0.6208,0.66051,0.68638,0.63249,0.66216,0.37164,0.  
3141,0.28726,0.32486,0.3119,0.31215,0.35087,0.30291,0.24276,0.31257,0.  
31489,0.15584,0.16284,0.16286,0.153,0.14542,0.15934,0.16815,0.15562,0.  
15702,0.16187,0.12909,0.1558,0.15335,0.15685,0.15481,0.15392,0.15555,0.  
.1573,0.68224,0.63375,0.67847,0.63965,0.63636,0.66461,0.64273,0.40068,  
0.41908,0.37641,0.29205,0.38398,0.31459,0.30334,0.30482,0.32688,0.3398  
5,0.3215,0.32846,0.33157,0.15215,0.15765,0.16707,0.16103,0.15999,0.163  
68,0.15521,0.15215,0.15454,0.15693,0.15541,0.15793,0.15297,0.17272,0.1  
4997,0.15704,0.15928,0.17115,0.65139,0.63278,0.64272,0.63496,0.66603,0

.64373,0.35651,0.45022,0.33803,0.3961,0.33665,0.33233,0.31543,0.33202,  
0.25069,0.32441,0.32793,0.32165,0.32429,0.32609,0.1471,0.15434,0.16849  
,0.15245,0.15656,0.1649,0.15358,0.15965,0.14629,0.18426,0.15758,0.1676  
9,0.15637,0.15426,0.14644,0.15111,0.15418,0.15789,0.65645,0.64451,0.64  
911,0.6402,0.67044,0.37723,0.3853,0.4247,0.37602,0.38381,0.36647,0.329  
45,0.31321,0.32738,0.32168,0.29718,0.36976,0.31395,0.30001,0.25758,0.1  
5227,0.16311,0.17519,0.15007,0.15786,0.15471,0.1547,0.15524,0.16024,0.  
15668,0.16007,0.15837,0.15762,0.15108,0.15974,0.15747,0.1544,0.18111,0.  
.63313,0.65182,0.64167,0.31964,0.3864,0.39586,0.3273,0.33807,0.38087,0.  
.33975,0.35137,0.33935,0.32637,0.26307,0.31984,0.29587,0.32626,0.34676  
,0.3518,0.32988,0.16844,0.15565,0.15534,0.15851,0.15772,0.15568,0.1546  
7,0.15125,0.15764,0.1609,0.15801,0.14308,0.15666,0.15489,0.15567,0.156  
47,0.15818,0.15776,0.66312,0.37563,0.3612,0.38134,0.39142,0.37677,0.35  
579,0.34548,0.38431,0.41703,0.32301,0.31173,0.33451,0.29706,0.35751,0.  
32262,0.33419,0.32341,0.29707,0.15407,0.15782,0.14635,0.14775,0.15563,  
0.15461,0.15098,0.16914,0.16222,0.15822,0.14911,0.15573,0.1591,0.15733  
,0.15515,0.15512,0.15676,0.096315,0.38814,0.32285,0.36495,0.37867,0.37  
1,0.35799,0.37917,0.34938,0.27083,0.42852,0.3229,0.3259,0.32661,0.3279  
1,0.26029,0.32369,0.30911,0.31602,0.35676,0.15419,0.1383,0.1514,0.1569  
3,0.18222,0.13135,0.16696,0.15408,0.15539,0.16427,0.15661,0.15831,0.15  
469,0.15708,0.16544,0.15453,0.15696,0.097255,0.44902,0.37124,0.36418,0.  
.36636,0.45265,0.40154,0.37236,0.36335,0.29507,0.40096,0.3367,0.31704,  
0.31287,0.30064,0.32271,0.35592,0.33175,0.30814,0.15666,0.15576,0.1512  
4,0.16678,0.16478,0.15022,0.15404,0.15931,0.13981,0.1663,0.15885,0.159  
19,0.15719,0.15585,0.15576,0.15459,0.15606,0.15681,0.096117,0.40925,0.  
29862,0.40835,0.38136,0.3602,0.40605,0.3383,0.34789,0.34519,0.38235,0.  
31223,0.33853,0.34832,0.28636,0.33121,0.27837,0.30867,0.32538,0.15595,  
0.15319,0.161,0.15616,0.15483,0.15081,0.14982,0.1537,0.16367,0.15659,0.  
.15823,0.15958,0.14607,0.15173,0.15772,0.15457,0.16279,0.096875,0.0955  
77,0.094609,0.42168,0.31601,0.35672,0.3808,0.32892,0.36018,0.37906,0.3  
394,0.44359,0.3501,0.29651,0.31282,0.30955,0.32986,0.3163,0.15579,0.16  
505,0.15413,0.15679,0.15824,0.14833,0.15843,0.1477,0.15523,0.14836,0.1  
5604,0.15957,0.17,0.16385,0.16249,0.16138,0.15293,0.15545,0.096639,0.0  
96699,0.095843,0.097253,0.35297,0.36291,0.3699,0.39327,0.39413,0.36346  
,0.36564,0.36203,0.34366,0.32185,0.33379,0.34272,0.16193,0.15565,0.187  
21,0.1686,0.16168,0.15676,0.1511,0.15336,0.16297,0.15798,0.15441,0.160  
34,0.15399,0.15818,0.15336,0.15998,0.15482,0.16748,0.15476,0.14267,0.0  
945,0.095774,0.09726,0.096933,0.097408,0.095121,0.35999,0.28965,0.3812  
3,0.36199,0.34932,0.45124,0.42517,0.25845,0.15971,0.14208,0.15433,0.15  
611,0.1564,0.16298,0.17693,0.14827,0.15636,0.1568,0.14872,0.16378,0.15  
375,0.15367,0.15199,0.15446,0.15287,0.15853,0.15062,0.15405,0.1632,0.1  
7334,0.16482,0.09522,0.096841,0.095246,0.094388,0.096353,0.096589,0.39  
277,0.28873,0.36218,0.38176,0.35597,0.095527,0.097281,0.15654,0.16655,  
0.15504,0.15982,0.15382,0.15486,0.15518,0.15374,0.15245,0.158,0.16331,  
0.15817,0.1555,0.16161,0.15675,0.17464,0.13726,0.15473,0.15841,0.17071  
,0.15317,0.096127,0.097747,0.095928,0.095943,0.097134,0.095452,0.09648  
9,0.094126,0.094112,0.095902,0.37464,0.38763,0.094349,0.096154,0.09522  
5,0.094922,0.15352,0.15741,0.13403,0.1675,0.1456,0.15677,0.15708,0.156  
78,0.16272,0.16556,0.15703,0.15315,0.16958,0.15549,0.17451,0.14647,0.1  
5088,0.15756,0.1569,0.095504,0.097447,0.095871,0.096122,0.09553,0.0979  
03,0.096234,0.096343,0.095718,0.096756,0.094035,0.096053,0.097472,0.09  
6455,0.096662,0.097721,0.095499,0.15274,0.17174,0.16693,0.14596,0.1702



,0.15538,0.15608,0.1632,0.15121,0.16758,0.15439,0.15425,0.15824,0.16702,0.1746,0.15932,0.095087,0.098351,0.095316,0.096615,0.096136,0.095442,0.097323,0.095806,0.097731,0.098485,0.095599,0.09689,0.096634,0.094744,0.097216,0.096712,0.093186,0.096011,0.094983,0.15451,0.15579,0.15673,0.14841,0.15623,0.15567,0.1587,0.15432,0.1582,0.1479,0.14794,0.1537,0.15323,0.09601,0.095729,0.095714,0.095043,0.097166,0.098659,0.097532,0.095363,0.097208,0.096423,0.094955,0.096816,0.095495,0.097787,0.096798,0.096132,0.09562,0.095832,0.09774,0.097356,0.095193,0.15612,0.17614,0.16321,0.15242,0.1526,0.15593,0.16059,0.16588,0.15719,0.094603,0.095549,0.096409,0.095394,0.094597,0.095214,0.098253,0.096845,0.097762,0.096231,0.098051,0.094199,0.093748,0.096989,0.099553,0.096231,0.097787,0.094959,0.096114,0.094095,0.09645,0.097091,0.09483,0.09611,0.093016,0.14625,0.16341,0.14807,0.15906,0.095754,0.095868,0.0981,0.096356,0.095259,0.097282,0.095726,0.095142,0.096471,0.095675,0.09748,0.094796,0.095674,0.095083,0.094235,0.097464,0.096794,0.094413,0.097897,0.095597,0.09405,0.095662,0.094974,0.098386,0.097848,0.093875,0.095299,0.095327,0.097222,0.098538,0.095014,0.095967,0.096525,0.096437,0.09588,0.097489,0.095917,0.097004,0.093708,0.097308,0.095029,0.097462,0.09793,0.096531,0.09612,0.094985,0.095246,0.097179,0.096226,0.094692,0.094134,0.096794,0.096258,0.094649,0.096341,0.09783,0.097159,0.096074,0.093939,0.095191,0.097777,0.097176,0.092188,0.09609,0.096275,0.094988,0.09516,0.095936,0.095742,0.096482,0.096301,0.097098,0.097024,0.095859,0.096298,0.096487,0.096094,0.098749,0.097142,0.096148,0.092778,0.096697,0.095574,0.095186,0.097268,0.096549,0.095823,0.096565,0.096102,0.096593,0.096171,0.09694,0.096945,0.098443,0.096535,0.094346,0.095818,0.096547,0.095188,0.095595,0.095648,0.09755,0.096143,0.094756,0.096919,0.098729,0.095091,0.096379,0.095808,0.097749,0.094424,0.096219,0.0946,0.096333,0.096646,0.097098,0.09703,0.096108,0.09662,0.098175,0.096425,0.097442,0.099544,0.096571,0.098024,0.097164,0.09628,0.096559,0.095787,0.096597,0.095869,0.094658,0.092783,0.099341,0.097442,0.0955,0.097117,0.098684,0.095097,0.096518,0.096434,0.096817,0.096421,0.096886,0.096588,0.095763,0.096169,0.095633,0.096557,0.094948,0.096198,0.095547,0.095325,0.096347,0.096183,0.095903,0.095892,0.0944,0.096092,0.096759,0.095033,0.09617,0.095071,0.095233,0.094535,0.096524,0.095334,0.097947,0.09626,0.096281,0.094015,0.095479,0.096782,0.0969,0.095201,0.093702,0.097991,0.095167,0.098696,0.096664,0.098119,0.095756,0.095865,0.093691,0.096889,0.095324,0.093926,0.094653,0.095339,0.096171,0.094232,0.095009,0.09813,0.096128,0.095244

0.19993,0.19822,0.20176,0.20188,0.19989,0.20495,0.20009,0.20426,0.20125,0.20179,0.2016,0.20104,0.20401,0.20315,0.2008,0.20164,0.2005,0.20242,0.19698,0.1979,0.34344,0.34429,0.36721,0.38769,0.20041,0.20124,0.20181,0.20024,0.20003,0.20217,0.20267,0.20376,0.20144,0.20025,0.2026,0.20396,0.20116,0.20483,0.19987,0.5484,0.36916,0.3664,0.37202,0.39158,0.3612,0.37498,0.20043,0.1999,0.19938,0.19961,0.19829,0.20239,0.20212,0.20062,0.20206,0.1999,0.20122,0.19973,0.20377,0.20224,0.19919,0.5225,0.54663,0.35172,0.35948,0.36068,0.36266,0.34725,0.37334,0.36201,0.38153,0.20315,0.20099,0.20304,0.19922,0.20107,0.20298,0.20297,0.19968,0.19908,0.19972,0.20181,0.20076,0.19912,0.20405,0.20255,0.55254,0.54235,0.55726,0.36743,0.37512,0.4201,0.36028,0.37198,0.35858,0.34877,0.3758,0.37448,0.20012,0.20261,0.2014,0.2015,0.20145,0.20203,0.20122,0.20125,0.20143,0.19836,0.1993,0.1994,0.20289,0.20255,0.20061,0.2046,0.55232,0.5322,0.50634,0.54891,0.37735,0.35969,0.36779,0.37302,0.40546,0.36367,0.35205

,0.34442,0.38134,0.35835,0.20074,0.20063,0.20108,0.19925,0.20085,0.19875,0.20136,0.20067,0.20109,0.20255,0.20053,0.19948,0.20044,0.19956,0.2001,0.20005,0.54726,0.54707,0.55157,0.52509,0.54105,0.55596,0.39045,0.38161,0.38414,0.36728,0.35288,0.39446,0.38899,0.36648,0.37805,0.40647,0.20152,0.20082,0.20113,0.19835,0.19952,0.20269,0.19997,0.20185,0.19886,0.19947,0.20047,0.20281,0.2013,0.20231,0.20078,0.20131,0.201,0.56308,0.51101,0.54753,0.5385,0.55973,0.51374,0.41283,0.35924,0.35743,0.39993,0.3657,0.3792,0.38738,0.35696,0.34686,0.39394,0.35619,0.20298,0.20227,0.19963,0.20022,0.20034,0.20095,0.20302,0.2022,0.2035,0.19944,0.2023,0.20311,0.19742,0.13283,0.14253,0.14721,0.19918,0.54861,0.54473,0.50674,0.57127,0.55603,0.54814,0.51933,0.36089,0.41934,0.38018,0.41206,0.38079,0.37172,0.36047,0.36226,0.36085,0.37055,0.36655,0.19967,0.20255,0.20212,0.20498,0.19854,0.20151,0.20453,0.20305,0.20183,0.20158,0.19929,0.13893,0.15144,0.14094,0.1363,0.13954,0.13798,0.20375,0.54251,0.53391,0.54988,0.52868,0.54488,0.54837,0.57032,0.37651,0.41496,0.35735,0.3636,0.37158,0.43589,0.35858,0.36397,0.3822,0.381,0.36832,0.19975,0.20293,0.20161,0.20089,0.201,0.19969,0.20258,0.19816,0.19745,0.13784,0.14404,0.13307,0.13485,0.14093,0.13647,0.14581,0.13893,0.13333,0.20176,0.52073,0.50128,0.54531,0.55584,0.57496,0.53662,0.51873,0.37976,0.36773,0.38848,0.39389,0.34692,0.38243,0.35027,0.37796,0.35529,0.34445,0.36831,0.36961,0.20354,0.20002,0.20205,0.2028,0.20149,0.19891,0.14015,0.14096,0.14967,0.13348,0.14189,0.14189,0.13086,0.12563,0.13456,0.14038,0.13396,0.14493,0.55101,0.52245,0.53541,0.55301,0.51941,0.52484,0.51812,0.38449,0.38189,0.37608,0.37182,0.36422,0.37399,0.41759,0.36313,0.39767,0.38923,0.41152,0.40818,0.20295,0.19905,0.20196,0.14372,0.11704,0.14049,0.12696,0.13901,0.14489,0.14392,0.1388,0.13803,0.12814,0.13924,0.14447,0.1389,0.14104,0.13995,0.54159,0.50007,0.53444,0.52586,0.57869,0.53779,0.54304,0.51899,0.54793,0.37133,0.40286,0.3824,0.40004,0.37114,0.39842,0.38212,0.3808,0.41893,0.38129,0.37564,0.1423,0.13298,0.13986,0.13827,0.15064,0.14149,0.13202,0.14189,0.14204,0.14084,0.14367,0.15276,0.13679,0.14242,0.1352,0.14316,0.13224,0.14383,0.54125,0.58488,0.53743,0.53589,0.55502,0.5378,0.53127,0.54448,0.5055,0.34797,0.3956,0.26919,0.27249,0.2706,0.3166,0.27441,0.26454,0.26179,0.26718,0.28666,0.14228,0.14234,0.15111,0.13944,0.14099,0.14128,0.14192,0.14236,0.14166,0.13856,0.13806,0.13845,0.1459,0.13122,0.14366,0.1409,0.13879,0.13942,0.5245,0.52289,0.56719,0.54915,0.52629,0.55673,0.57047,0.53064,0.55733,0.30906,0.26557,0.24564,0.27736,0.26358,0.26678,0.30036,0.26391,0.213,0.26471,0.26516,0.13906,0.14676,0.14619,0.13744,0.12877,0.14434,0.15184,0.14027,0.14078,0.14658,0.11256,0.14003,0.13667,0.14122,0.14045,0.13965,0.13977,0.1413,0.56816,0.52824,0.5681,0.52738,0.52903,0.55692,0.53389,0.33571,0.35603,0.31006,0.25118,0.32071,0.2638,0.25927,0.26162,0.27692,0.29403,0.27563,0.28023,0.281,0.1369,0.14122,0.15159,0.14556,0.14387,0.14795,0.14033,0.13689,0.13758,0.1404,0.13971,0.14195,0.13782,0.15656,0.13391,0.14158,0.14258,0.15594,0.53904,0.53296,0.53009,0.52395,0.55181,0.53713,0.30282,0.37238,0.28077,0.33805,0.27852,0.27951,0.27015,0.2889,0.21967,0.2772,0.27534,0.2816,0.27851,0.2824,0.13225,0.13989,0.15291,0.13646,0.14139,0.14892,0.13655,0.14366,0.12978,0.16708,0.14195,0.15103,0.14114,0.13818,0.13066,0.13458,0.13704,0.14126,0.54078,0.54199,0.54662,0.5217,0.55439,0.31228,0.31921,0.35987,0.30747,0.31272,0.30414,0.28382,0.26119,0.28177,0.27824,0.2589,0.31537,0.26915,0.25452,0.22459,0.13581,0.14657,0.1592,0.13372,0.1425,0.13993,0.1401,0.13967,0.1458,0.14111,0.14355,0.14281,0.14223,0.13475,0.14396,0.14131,0.13956,0.16428,0.

52747,0.54073,0.53782,0.26577,0.32076,0.33601,0.27188,0.28248,0.32297,  
0.2804,0.28683,0.28919,0.28269,0.22926,0.27643,0.25611,0.27597,0.29615  
,0.30374,0.28368,0.15246,0.14121,0.13919,0.14226,0.14244,0.13979,0.139  
53,0.13564,0.14142,0.14409,0.14289,0.12753,0.1416,0.1386,0.14043,0.141  
48,0.14302,0.14175,0.54599,0.3121,0.30347,0.31722,0.32886,0.31376,0.30  
199,0.28294,0.31743,0.35015,0.27298,0.26615,0.28489,0.25421,0.29934,0.  
27175,0.2872,0.28265,0.25626,0.1393,0.14232,0.13019,0.13177,0.14006,0.  
13952,0.13613,0.15372,0.14667,0.14253,0.13334,0.14051,0.14348,0.14245,  
0.14018,0.13968,0.14031,0.079229,0.32212,0.26012,0.30259,0.31451,0.314  
18,0.30481,0.3161,0.29272,0.22488,0.35081,0.28006,0.27704,0.27414,0.27  
969,0.22075,0.27654,0.26716,0.26741,0.30145,0.13873,0.12262,0.13563,0.  
14168,0.16724,0.11467,0.15111,0.13775,0.13974,0.14821,0.14067,0.1418,0  
.13794,0.14085,0.14964,0.13853,0.14144,0.080999,0.3691,0.30827,0.30707  
,0.30121,0.38353,0.33924,0.30592,0.30422,0.24117,0.33327,0.29262,0.270  
54,0.26406,0.25454,0.27324,0.30833,0.28247,0.26394,0.14094,0.1397,0.13  
573,0.15124,0.14831,0.13429,0.13799,0.14334,0.12334,0.14971,0.14371,0.  
14267,0.142,0.14129,0.1401,0.13857,0.14074,0.14044,0.080069,0.34561,0.  
24252,0.34162,0.31485,0.30096,0.33401,0.27872,0.28827,0.28352,0.31942,  
0.26812,0.28754,0.29571,0.24594,0.28029,0.24237,0.26564,0.27969,0.1403  
5,0.13661,0.14502,0.14076,0.13974,0.13499,0.13406,0.13629,0.14829,0.14  
182,0.14188,0.14426,0.12989,0.13734,0.14126,0.14074,0.14762,0.079056,0  
.079114,0.078366,0.35043,0.26494,0.29861,0.31545,0.27423,0.30708,0.313  
22,0.27638,0.36632,0.30158,0.25485,0.27362,0.26684,0.28012,0.27626,0.1  
3893,0.14914,0.1389,0.1411,0.14221,0.13333,0.14403,0.13092,0.13855,0.1  
3164,0.14128,0.14294,0.15394,0.14836,0.14516,0.14458,0.13627,0.13924,0  
.079954,0.08132,0.078215,0.080155,0.28898,0.30545,0.30501,0.32518,0.33  
423,0.29878,0.30227,0.2996,0.27943,0.27445,0.28597,0.29559,0.14664,0.1  
397,0.17217,0.15273,0.14554,0.14017,0.13529,0.13814,0.1478,0.14209,0.1  
3834,0.1454,0.13882,0.14281,0.13597,0.14425,0.13918,0.15045,0.13898,0.  
1268,0.077636,0.079511,0.08091,0.080365,0.080351,0.079227,0.3007,0.243  
99,0.32287,0.30087,0.29441,0.37426,0.3594,0.21652,0.1437,0.12664,0.139  
61,0.13965,0.14076,0.14766,0.16107,0.13325,0.14025,0.14116,0.1326,0.14  
67,0.13906,0.13802,0.13477,0.13809,0.13671,0.14269,0.1342,0.13933,0.14  
743,0.15833,0.14898,0.078312,0.080737,0.079733,0.078002,0.079893,0.079  
77,0.31445,0.24257,0.29652,0.32209,0.3009,0.079001,0.080656,0.14032,0.  
15159,0.13913,0.14368,0.13855,0.13861,0.14016,0.13714,0.13723,0.14284,  
0.14778,0.14349,0.1403,0.14596,0.14056,0.15883,0.12069,0.13877,0.14214  
,0.15493,0.13721,0.079542,0.081645,0.079702,0.079884,0.08076,0.078523,  
0.080348,0.077651,0.077862,0.080094,0.31475,0.31726,0.078232,0.080293,  
0.078234,0.078681,0.13763,0.14042,0.1186,0.15162,0.13104,0.14108,0.141  
19,0.13998,0.14704,0.14996,0.14077,0.13754,0.15499,0.13928,0.16021,0.1  
3141,0.13419,0.14153,0.14235,0.08012,0.080555,0.079447,0.079767,0.0783  
92,0.081718,0.080009,0.080156,0.079586,0.080064,0.077051,0.078944,0.08  
0484,0.079775,0.080413,0.081703,0.079467,0.1366,0.15583,0.1514,0.13028  
,0.15473,0.14005,0.13914,0.1494,0.13404,0.15076,0.13924,0.13854,0.1425  
9,0.15157,0.15828,0.14417,0.078854,0.082696,0.078033,0.080501,0.079515  
,0.079842,0.080348,0.079703,0.080611,0.082234,0.077922,0.079834,0.0804  
01,0.079003,0.080751,0.080753,0.076956,0.079993,0.078906,0.13907,0.140  
24,0.13994,0.13348,0.14228,0.14079,0.14194,0.13917,0.14154,0.13209,0.1  
3119,0.13769,0.13748,0.080784,0.079427,0.079828,0.079047,0.080527,0.08  
2173,0.081226,0.079329,0.080086,0.080745,0.079441,0.079714,0.079739,0.  
081201,0.08017,0.080169,0.079235,0.079269,0.081162,0.080803,0.078475,0

.13976,0.16065,0.14748,0.13731,0.1367,0.14015,0.14467,0.14902,0.14072,  
0.078277,0.078593,0.080662,0.078515,0.078675,0.079788,0.080759,0.08001  
8,0.081219,0.080473,0.081806,0.078679,0.077447,0.080681,0.082569,0.079  
777,0.081018,0.0787,0.079339,0.078079,0.080464,0.080742,0.077503,0.080  
222,0.077714,0.13106,0.14628,0.1314,0.14297,0.079266,0.079153,0.081645  
,0.079462,0.078835,0.080059,0.079352,0.079489,0.080546,0.079192,0.0798  
54,0.07912,0.080045,0.078034,0.077748,0.081226,0.081516,0.078285,0.081  
191,0.079689,0.082015,0.079595,0.07838,0.081365,0.080226,0.077686,0.07  
879,0.077518,0.080838,0.082719,0.078793,0.079135,0.079821,0.079761,0.0  
78903,0.079678,0.08005,0.080874,0.077002,0.079815,0.078987,0.080677,0.  
081898,0.080844,0.079963,0.077736,0.079124,0.080726,0.080484,0.079589,  
0.078022,0.080149,0.079979,0.079096,0.079311,0.081562,0.081021,0.07944  
5,0.078508,0.079432,0.08167,0.080176,0.076469,0.079589,0.079763,0.0786  
24,0.078887,0.079908,0.079713,0.080018,0.079768,0.080362,0.079712,0.07  
9966,0.079953,0.079694,0.079376,0.082467,0.081367,0.080324,0.077073,0.  
08003,0.079967,0.079123,0.080656,0.080238,0.079119,0.080581,0.080331,0  
.07956,0.08044,0.079854,0.079845,0.081696,0.080399,0.078463,0.079883,0  
.080107,0.078676,0.079137,0.079212,0.079691,0.080306,0.078337,0.080802  
,0.082095,0.079114,0.079565,0.079484,0.082534,0.078363,0.079642,0.0781  
15,0.080642,0.079037,0.081267,0.081053,0.078977,0.080738,0.081414,0.08  
1091,0.082041,0.083887,0.080543,0.08191,0.080934,0.080193,0.080689,0.0  
79374,0.080386,0.079183,0.077107,0.077167,0.083272,0.081022,0.079468,0  
.080811,0.082213,0.079579,0.080858,0.079563,0.081543,0.079962,0.081059  
,0.080792,0.079537,0.08018,0.079057,0.080403,0.07912,0.07964,0.079671,  
0.079713,0.07989,0.080292,0.079328,0.080025,0.078831,0.080678,0.079524  
,0.079776,0.079111,0.079255,0.079058,0.079113,0.080046,0.080155,0.0818  
76,0.080335,0.080116,0.078519,0.079719,0.081661,0.080155,0.079143,0.07  
8199,0.081821,0.079103,0.082349,0.08041,0.081521,0.079479,0.079703,0.0  
78116,0.080397,0.078809,0.077339,0.078501,0.079632,0.079517,0.077705,0  
.078624,0.081127,0.079555,0.079535  
0.18534,0.18215,0.1851,0.186,0.18451,0.18841,0.18481,0.18732,0.18463,0  
.18658,0.18615,0.18414,0.1884,0.18713,0.18591,0.18535,0.18417,0.18592,  
0.1815,0.18131,0.3069,0.31078,0.33721,0.34188,0.18426,0.18516,0.18599,  
0.18492,0.18364,0.18692,0.18627,0.18721,0.18665,0.18465,0.18581,0.1883  
1,0.1848,0.18872,0.18335,0.46899,0.32459,0.33048,0.33539,0.35135,0.317  
52,0.32482,0.18379,0.18346,0.18475,0.18199,0.18394,0.18647,0.18684,0.1  
8321,0.18607,0.18392,0.18491,0.18499,0.18904,0.18526,0.18256,0.44963,0  
.48961,0.3086,0.32175,0.32548,0.32183,0.31355,0.32947,0.32545,0.33629,  
0.1863,0.18429,0.18617,0.18435,0.18534,0.18715,0.18666,0.1836,0.18282,  
0.1848,0.18454,0.18436,0.18377,0.18959,0.18676,0.47392,0.49007,0.467,0  
.32908,0.33162,0.37365,0.31805,0.3303,0.31528,0.31035,0.34497,0.33358,  
0.18399,0.18684,0.1857,0.18549,0.18636,0.18509,0.18689,0.18436,0.18625  
,0.18375,0.1837,0.18361,0.18764,0.1855,0.18472,0.18866,0.49429,0.4642,  
0.43348,0.47166,0.33769,0.3211,0.31295,0.33093,0.36036,0.31639,0.31474  
,0.31367,0.33998,0.32183,0.18504,0.18482,0.18482,0.18388,0.18495,0.183  
29,0.18564,0.18526,0.18485,0.18749,0.18344,0.18526,0.18491,0.18411,0.1  
8295,0.18371,0.48596,0.49005,0.48038,0.44497,0.48228,0.49992,0.35177,0  
.33359,0.34306,0.32999,0.31368,0.34593,0.34144,0.3232,0.32836,0.36051,  
0.18564,0.18401,0.18501,0.18254,0.1842,0.18595,0.18248,0.18675,0.18242  
,0.18477,0.18558,0.18695,0.18591,0.18496,0.18546,0.18565,0.1854,0.4902  
6,0.45003,0.49397,0.47665,0.47684,0.44029,0.36152,0.32199,0.32102,0.35  
565,0.32413,0.33177,0.34453,0.31762,0.30697,0.35184,0.30866,0.18623,0.

18597,0.18309,0.18455,0.18611,0.18422,0.18758,0.18519,0.18644,0.18315,  
0.1867,0.18724,0.1813,0.11918,0.12905,0.13215,0.1842,0.47107,0.47808,0  
.44621,0.49414,0.48979,0.50209,0.45567,0.31513,0.37411,0.33565,0.36722  
,0.3357,0.33895,0.32176,0.32103,0.32685,0.33469,0.32518,0.18462,0.1863  
5,0.18385,0.1884,0.18311,0.18521,0.18919,0.18742,0.18574,0.18561,0.182  
97,0.12514,0.1376,0.12721,0.12141,0.12608,0.1239,0.18785,0.4799,0.4671  
2,0.48245,0.45455,0.47279,0.48355,0.50227,0.33648,0.37062,0.31319,0.32  
322,0.33059,0.38107,0.31954,0.32186,0.34493,0.34545,0.3271,0.18443,0.1  
8793,0.18626,0.1854,0.18396,0.18369,0.18568,0.18346,0.18108,0.12402,0.  
12958,0.11944,0.12061,0.1271,0.12259,0.13105,0.12442,0.11888,0.18564,0  
.45898,0.4345,0.47451,0.4932,0.50748,0.45643,0.47955,0.34183,0.31881,0  
.34405,0.34926,0.3096,0.33479,0.30944,0.33337,0.31992,0.30986,0.33598,  
0.33287,0.1874,0.18335,0.1866,0.18767,0.18399,0.18351,0.12692,0.12715,  
0.13593,0.11974,0.12808,0.12849,0.11649,0.11187,0.12104,0.12729,0.1206  
7,0.13135,0.48763,0.45678,0.47191,0.48057,0.44893,0.44739,0.45157,0.34  
491,0.34402,0.33661,0.32674,0.32291,0.33255,0.37206,0.32538,0.35227,0.  
35479,0.36808,0.3635,0.18753,0.18347,0.18516,0.12918,0.10317,0.12587,0  
.11414,0.1248,0.13025,0.13041,0.12332,0.12405,0.11506,0.12532,0.1301,0  
.12502,0.12802,0.12604,0.48165,0.43191,0.46687,0.44086,0.51771,0.46044  
,0.47276,0.44069,0.47577,0.33195,0.35779,0.33864,0.35684,0.33504,0.351  
98,0.34367,0.33779,0.37396,0.34006,0.33712,0.12897,0.11914,0.12556,0.1  
2562,0.13608,0.12705,0.11769,0.12835,0.12811,0.126,0.12864,0.13809,0.1  
2423,0.129,0.12148,0.12928,0.11841,0.12991,0.46397,0.51177,0.47547,0.4  
7345,0.47576,0.46567,0.45835,0.48204,0.44091,0.31049,0.35058,0.24076,0  
.24363,0.23347,0.27743,0.24268,0.23605,0.23265,0.23609,0.2543,0.12823,  
0.12637,0.13558,0.12535,0.12646,0.12622,0.12731,0.12845,0.12745,0.1236  
9,0.12409,0.12429,0.13216,0.11718,0.12968,0.12666,0.12471,0.12577,0.46  
258,0.44569,0.49679,0.48925,0.45976,0.4913,0.50559,0.4728,0.46935,0.26  
812,0.23879,0.21651,0.24651,0.22648,0.23902,0.26777,0.23952,0.18612,0.  
22875,0.23435,0.12582,0.1326,0.13053,0.1242,0.11461,0.13057,0.13611,0.  
12673,0.1267,0.13344,0.099244,0.12693,0.12334,0.12632,0.12737,0.12641,  
0.12403,0.12679,0.49816,0.45567,0.51248,0.46631,0.45899,0.48146,0.4692  
6,0.28983,0.31671,0.27052,0.21916,0.28591,0.23727,0.23198,0.2289,0.243  
86,0.26187,0.24795,0.25478,0.24577,0.12416,0.12647,0.13889,0.13151,0.1  
3086,0.13352,0.126,0.12235,0.12444,0.1267,0.12588,0.1283,0.12473,0.142  
28,0.11931,0.12747,0.12943,0.14149,0.46873,0.46188,0.45664,0.46081,0.4  
7537,0.46656,0.26532,0.32316,0.24267,0.30235,0.23562,0.24843,0.23894,0  
.25248,0.19301,0.24149,0.24327,0.24455,0.25149,0.24989,0.11871,0.125,0  
.13856,0.12197,0.12741,0.13372,0.12307,0.12968,0.11621,0.15169,0.12864  
,0.13686,0.12746,0.124,0.11732,0.12153,0.12334,0.12722,0.48905,0.46263  
,0.47873,0.45859,0.49561,0.27494,0.27934,0.31659,0.26635,0.27041,0.265  
16,0.24889,0.2288,0.25129,0.24548,0.23436,0.27492,0.23517,0.22926,0.19  
993,0.12257,0.13382,0.1434,0.11907,0.12714,0.12649,0.12522,0.12554,0.1  
3171,0.12585,0.12973,0.12806,0.12825,0.12056,0.13047,0.12849,0.1253,0.  
14982,0.46321,0.48025,0.45717,0.23628,0.27539,0.29537,0.23798,0.25208,  
0.28508,0.24954,0.24589,0.25398,0.25655,0.2052,0.24271,0.22336,0.24252  
,0.26094,0.27114,0.25226,0.13796,0.12659,0.1239,0.12903,0.12785,0.1259  
6,0.12603,0.12183,0.12714,0.12929,0.12828,0.11508,0.12768,0.12543,0.12  
656,0.12828,0.12871,0.12914,0.49173,0.27179,0.26332,0.27598,0.28377,0.  
27784,0.26795,0.24454,0.27772,0.31173,0.24659,0.23383,0.25141,0.22425,  
0.26576,0.24073,0.25927,0.24769,0.22726,0.12486,0.12769,0.11641,0.1183  
1,0.12585,0.12553,0.12191,0.13848,0.13357,0.12786,0.11971,0.12642,0.13

059,0.12856,0.12738,0.12448,0.12533,0.066642,0.28023,0.22366,0.26447,0.27645,0.27327,0.27624,0.2771,0.25501,0.19904,0.30087,0.25049,0.24627,0.24063,0.24634,0.19684,0.24254,0.23605,0.23661,0.2615,0.12432,0.10834,0.12068,0.12792,0.15361,0.10053,0.13618,0.1233,0.12642,0.13315,0.12718,0.12766,0.12347,0.12606,0.13417,0.12453,0.12667,0.068616,0.31464,0.27407,0.2699,0.26343,0.33659,0.30228,0.27159,0.25887,0.20883,0.29718,0.2602,0.23417,0.23831,0.23037,0.24161,0.26899,0.25616,0.23611,0.12589,0.12495,0.1219,0.13636,0.13387,0.12143,0.12407,0.12937,0.10987,0.13565,0.12933,0.12895,0.12776,0.12778,0.12507,0.12391,0.12722,0.1256,0.067202,0.30205,0.20754,0.30494,0.27454,0.26636,0.29546,0.24859,0.25402,0.24635,0.28752,0.23553,0.25247,0.26328,0.21046,0.24636,0.2167,0.2344,0.2479,0.12578,0.12323,0.13077,0.12592,0.12592,0.12148,0.12121,0.12233,0.13398,0.12755,0.12676,0.12979,0.11519,0.12233,0.12832,0.12718,0.133,0.066926,0.068117,0.066346,0.31357,0.23356,0.25886,0.27457,0.24204,0.26426,0.2702,0.22723,0.31357,0.27081,0.22624,0.24071,0.23413,0.25089,0.24676,0.12615,0.13429,0.12442,0.12755,0.12733,0.11961,0.12956,0.11715,0.12411,0.11783,0.12752,0.12751,0.13946,0.13318,0.13186,0.13182,0.12243,0.12561,0.067411,0.068766,0.065921,0.068681,0.24942,0.26371,0.26397,0.28465,0.29963,0.26475,0.26287,0.25728,0.23711,0.23749,0.25743,0.25484,0.1315,0.12409,0.1565,0.13961,0.1303,0.12612,0.12218,0.12292,0.13347,0.1271,0.1246,0.13157,0.12413,0.12948,0.12144,0.12942,0.12668,0.1356,0.12385,0.1139,0.065816,0.06626,0.068016,0.067887,0.068699,0.068043,0.25627,0.21351,0.28607,0.26168,0.2567,0.32066,0.31316,0.19009,0.12992,0.1148,0.12573,0.12515,0.12642,0.13285,0.14537,0.11845,0.12604,0.12763,0.11839,0.13284,0.12486,0.12473,0.11971,0.1242,0.12328,0.12845,0.12017,0.12485,0.13305,0.14355,0.13372,0.065415,0.068036,0.067413,0.06563,0.066313,0.068817,0.27244,0.20987,0.2522,0.27733,0.2683,0.067728,0.06915,0.12592,0.13701,0.12516,0.12951,0.12459,0.12298,0.12659,0.12317,0.1226,0.12854,0.13466,0.12953,0.1267,0.13319,0.12686,0.14357,0.10725,0.12513,0.12765,0.14041,0.12367,0.06699,0.068692,0.066947,0.068055,0.067174,0.066043,0.068213,0.065696,0.066047,0.066894,0.27829,0.26881,0.067562,0.068202,0.065684,0.067054,0.12289,0.1263,0.10529,0.13814,0.11827,0.12624,0.12743,0.12542,0.13313,0.13652,0.12666,0.12284,0.13968,0.12573,0.14555,0.11696,0.12028,0.12813,0.12756,0.067664,0.068392,0.067163,0.067687,0.06683,0.069539,0.067771,0.068129,0.067763,0.067004,0.066128,0.066587,0.067425,0.067914,0.067845,0.069677,0.06608,0.1233,0.14089,0.1372,0.11674,0.14011,0.12673,0.12534,0.13557,0.12022,0.13648,0.12473,0.12432,0.12917,0.13774,0.14377,0.12978,0.067032,0.069908,0.066146,0.069625,0.067685,0.067717,0.068658,0.067664,0.067176,0.069963,0.065398,0.068168,0.068284,0.067648,0.067185,0.069308,0.065176,0.06719,0.066592,0.12446,0.12723,0.12582,0.11985,0.12799,0.12797,0.12784,0.12459,0.1274,0.11872,0.11717,0.1231,0.12363,0.067188,0.067937,0.067875,0.06699,0.068785,0.068866,0.070377,0.067901,0.068017,0.068286,0.066821,0.067404,0.066792,0.068337,0.067755,0.066855,0.067229,0.067901,0.069328,0.068895,0.067241,0.12552,0.14739,0.13328,0.12371,0.1226,0.1258,0.13068,0.13547,0.12629,0.066678,0.067097,0.067624,0.065915,0.065935,0.067354,0.068489,0.068029,0.068487,0.068595,0.07004,0.066738,0.065287,0.069131,0.070202,0.067712,0.068394,0.066301,0.067447,0.065901,0.068751,0.069204,0.06471,0.068238,0.066694,0.11713,0.13207,0.11778,0.12805,0.067392,0.066571,0.070146,0.067145,0.06556,0.068988,0.067518,0.067448,0.068753,0.06707,0.06813,0.067249,0.067848,0.065933,0.066022,0.068829,0.069288,0.067293,0.069997,0.067067,0.069306,0.067962,0.066325,0.068689,0.067672,0.065156,0

.067645,0.065511,0.068488,0.070177,0.066855,0.066506,0.068396,0.068141  
,0.06624,0.066763,0.068326,0.069397,0.064012,0.067838,0.066753,0.06744  
9,0.068491,0.068997,0.068487,0.065811,0.066515,0.06795,0.068096,0.0674  
93,0.065118,0.067408,0.068036,0.067064,0.06799,0.069145,0.068752,0.067  
73,0.067193,0.066802,0.069021,0.067948,0.06535,0.067091,0.066933,0.066  
968,0.065666,0.067246,0.066438,0.067443,0.067323,0.067294,0.066116,0.0  
67602,0.068013,0.068299,0.067736,0.070713,0.069023,0.069423,0.065003,0  
.068315,0.067685,0.067168,0.069084,0.068388,0.067365,0.068519,0.067436  
,0.067317,0.068163,0.069097,0.06767,0.068105,0.068262,0.065987,0.06806  
6,0.067143,0.066567,0.067628,0.066375,0.06705,0.068359,0.066239,0.0693  
32,0.069416,0.067992,0.066984,0.068,0.069728,0.066423,0.067113,0.06589  
3,0.068043,0.067458,0.069194,0.067445,0.067498,0.068013,0.06985,0.0688  
19,0.070271,0.071766,0.067581,0.069576,0.067829,0.067909,0.068686,0.06  
7387,0.067285,0.06656,0.065164,0.06548,0.071314,0.068037,0.067352,0.06  
8447,0.071222,0.067056,0.068564,0.069117,0.068964,0.067073,0.069512,0.  
068593,0.06825,0.067876,0.066658,0.067709,0.066649,0.066287,0.067894,0  
.067761,0.06781,0.068363,0.067237,0.068234,0.066837,0.068906,0.067736,  
0.067059,0.06744,0.065826,0.066631,0.067737,0.06787,0.067091,0.069523,  
0.067819,0.068195,0.06598,0.067079,0.06862,0.06863,0.067196,0.066608,0  
.069168,0.066938,0.069527,0.068197,0.068224,0.067627,0.067062,0.065938  
,0.068329,0.066859,0.06518,0.067264,0.06676,0.066582,0.065825,0.066114  
,0.068494,0.067281,0.067157  
0.16847,0.16813,0.17009,0.1715,0.17094,0.17299,0.16858,0.17235,0.17177  
,0.17222,0.17168,0.16886,0.17428,0.17301,0.17136,0.17136,0.16987,0.171  
5,0.16673,0.16542,0.28014,0.28631,0.32069,0.31401,0.17057,0.17033,0.17  
,0.1692,0.17018,0.17274,0.17152,0.17111,0.17145,0.16976,0.1706,0.17467  
,0.16834,0.17205,0.16793,0.42278,0.2952,0.30482,0.31214,0.32467,0.2853  
9,0.29686,0.16978,0.16916,0.16915,0.16745,0.16955,0.17197,0.17073,0.16  
873,0.17125,0.16979,0.16917,0.17016,0.17273,0.17038,0.16851,0.41983,0.  
43693,0.27722,0.29651,0.30017,0.28732,0.28911,0.29982,0.30331,0.30967,  
0.17241,0.17024,0.17008,0.16906,0.17029,0.1726,0.17022,0.16862,0.16792  
,0.1693,0.16982,0.17078,0.16949,0.1726,0.17231,0.42952,0.44131,0.42454  
,0.29761,0.30164,0.34153,0.29077,0.30195,0.29432,0.28349,0.30918,0.304  
19,0.16913,0.17259,0.17228,0.17146,0.17179,0.17026,0.17126,0.16935,0.1  
7115,0.16879,0.16974,0.16912,0.17154,0.17107,0.17012,0.17446,0.46599,0  
.42429,0.39029,0.43415,0.31117,0.29787,0.29534,0.29886,0.32722,0.29067  
,0.28846,0.28265,0.31735,0.29763,0.16914,0.1703,0.16983,0.16924,0.1711  
4,0.16989,0.17096,0.17041,0.17046,0.17279,0.16897,0.17011,0.17071,0.16  
869,0.16745,0.1702,0.44328,0.45352,0.43597,0.39976,0.44842,0.45493,0.3  
2023,0.30705,0.31367,0.30308,0.2881,0.32083,0.3144,0.29268,0.30464,0.3  
3204,0.17062,0.17002,0.17054,0.16805,0.16834,0.17091,0.16753,0.17139,0  
.16849,0.16963,0.17081,0.17304,0.17044,0.17001,0.17016,0.17138,0.17108  
,0.45503,0.40443,0.45551,0.42839,0.43599,0.41502,0.32287,0.29132,0.287  
09,0.32655,0.28993,0.2939,0.3139,0.28397,0.27728,0.32328,0.27453,0.171  
66,0.16873,0.16853,0.16942,0.1717,0.16882,0.17261,0.17015,0.17175,0.16  
909,0.17305,0.17205,0.16648,0.10763,0.1174,0.12143,0.17055,0.44606,0.4  
441,0.41623,0.4566,0.45288,0.45957,0.42065,0.28782,0.34126,0.30024,0.3  
3871,0.3097,0.31056,0.29729,0.29396,0.30421,0.30392,0.3029,0.17064,0.1  
717,0.16859,0.17258,0.16895,0.1695,0.17392,0.17322,0.17051,0.16996,0.1  
6876,0.11254,0.12554,0.11472,0.10961,0.11479,0.11247,0.17305,0.42847,0  
.43217,0.44111,0.40741,0.43788,0.44305,0.45882,0.30459,0.34141,0.28797  
,0.28971,0.30256,0.34303,0.28121,0.28406,0.31358,0.32061,0.30288,0.169

97,0.17339,0.17198,0.17107,0.16977,0.16789,0.17178,0.16879,0.16786,0.1  
135,0.11897,0.10833,0.10957,0.11573,0.11116,0.11918,0.11414,0.10806,0.  
16971,0.42355,0.40018,0.43687,0.44964,0.46175,0.40259,0.43739,0.31695,  
0.29237,0.31596,0.32314,0.28339,0.31037,0.27925,0.30315,0.29329,0.2843  
1,0.30092,0.29841,0.17283,0.16969,0.17051,0.17162,0.16962,0.16921,0.11  
435,0.1157,0.12363,0.10827,0.11641,0.11705,0.1058,0.10142,0.11036,0.11  
471,0.10963,0.1183,0.43974,0.41142,0.42534,0.43509,0.42268,0.42705,0.4  
167,0.30911,0.31762,0.30757,0.29855,0.30106,0.30834,0.34255,0.30074,0.  
32085,0.32452,0.32641,0.33883,0.17086,0.16777,0.16955,0.1167,0.093045,  
0.11288,0.10142,0.11321,0.11878,0.11788,0.11236,0.11278,0.10421,0.1128  
8,0.11902,0.11252,0.11452,0.11488,0.43489,0.39477,0.42905,0.41564,0.47  
026,0.42513,0.44067,0.40264,0.44304,0.30322,0.34065,0.31968,0.32271,0.  
30322,0.32574,0.31681,0.30996,0.34375,0.30932,0.30641,0.117,0.10799,0.  
11477,0.11355,0.12421,0.11495,0.10685,0.11564,0.11499,0.11354,0.11597,  
0.12607,0.11201,0.11807,0.11028,0.11674,0.10702,0.11771,0.41643,0.4521  
,0.43236,0.44049,0.42021,0.42585,0.41563,0.4478,0.40321,0.28398,0.3143  
9,0.21823,0.22157,0.21694,0.25679,0.21802,0.21383,0.21615,0.21039,0.23  
014,0.11653,0.11351,0.12261,0.11398,0.11464,0.11476,0.11592,0.11587,0.  
11558,0.11206,0.11341,0.11281,0.12108,0.10514,0.11729,0.11437,0.11281,  
0.11386,0.42947,0.39202,0.45776,0.44368,0.42215,0.43857,0.47236,0.4267  
3,0.44696,0.23866,0.21595,0.19804,0.22598,0.2046,0.21736,0.24385,0.216  
97,0.17025,0.20747,0.21152,0.11441,0.12123,0.11902,0.11273,0.10488,0.1  
1764,0.12267,0.11394,0.11695,0.12176,0.089795,0.11486,0.11199,0.11511,  
0.11504,0.11407,0.1125,0.11534,0.46064,0.41861,0.47094,0.42989,0.41837  
,0.44047,0.41313,0.25755,0.29007,0.25592,0.2027,0.26399,0.21472,0.2092  
3,0.20845,0.21912,0.23927,0.22162,0.23267,0.22567,0.11183,0.11491,0.12  
592,0.11971,0.118,0.12055,0.11382,0.11101,0.11344,0.1154,0.11362,0.116  
57,0.11316,0.1301,0.10811,0.11545,0.11786,0.12847,0.41543,0.41956,0.42  
808,0.43388,0.43623,0.42493,0.24639,0.30194,0.21724,0.27166,0.21503,0.  
22631,0.21469,0.22757,0.17455,0.22209,0.22481,0.2215,0.23129,0.22659,0  
.107,0.11276,0.12606,0.11004,0.11632,0.12073,0.11169,0.118,0.10514,0.1  
3935,0.11686,0.12385,0.11521,0.11235,0.10563,0.10944,0.11214,0.11546,0  
.44493,0.42244,0.43399,0.42575,0.45622,0.25395,0.25605,0.28088,0.24312  
,0.24157,0.24469,0.23397,0.21207,0.22478,0.21959,0.2149,0.24422,0.2176  
,0.20339,0.18091,0.11221,0.12173,0.13148,0.10773,0.1168,0.114,0.11352,  
0.11385,0.11935,0.11397,0.11735,0.1158,0.11591,0.10992,0.11792,0.1152,  
0.11406,0.13662,0.41385,0.4251,0.41064,0.20887,0.24731,0.26683,0.21791  
,0.23347,0.25998,0.22538,0.21575,0.22383,0.23857,0.18725,0.22068,0.204  
65,0.21555,0.2353,0.2432,0.23089,0.12477,0.11487,0.11225,0.11614,0.116  
36,0.11409,0.1137,0.11092,0.11512,0.11646,0.11604,0.10263,0.11593,0.11  
413,0.11451,0.11717,0.11707,0.11758,0.44997,0.25462,0.23249,0.25139,0.  
25417,0.25657,0.24414,0.22818,0.25505,0.29033,0.22246,0.20993,0.22552,  
0.20155,0.23825,0.22398,0.23471,0.22109,0.20958,0.11303,0.11585,0.1040  
4,0.10717,0.1142,0.11358,0.10985,0.1273,0.12081,0.11633,0.10857,0.1147  
3,0.11897,0.11822,0.11522,0.11251,0.11397,0.058316,0.25668,0.20179,0.2  
3971,0.2575,0.2434,0.25129,0.25039,0.22849,0.17759,0.27433,0.22935,0.2  
2031,0.21914,0.22227,0.17722,0.22038,0.2155,0.21389,0.24184,0.11167,0.  
097469,0.10945,0.11516,0.14089,0.08944,0.12391,0.1106,0.11477,0.12067,  
0.11517,0.11519,0.11206,0.11299,0.12314,0.11301,0.1137,0.059364,0.2832  
,0.24615,0.24757,0.24506,0.31237,0.27857,0.25353,0.23968,0.18714,0.265  
52,0.23941,0.21402,0.21607,0.21262,0.22247,0.24645,0.23097,0.21342,0.1  
1399,0.11424,0.11031,0.12552,0.12118,0.10993,0.11308,0.11652,0.10001,0



.1239,0.11712,0.1174,0.11542,0.11648,0.11348,0.11212,0.11572,0.1144,0.058834,0.2722,0.18766,0.28793,0.25633,0.23583,0.26689,0.22494,0.23346,0.2241,0.26425,0.21411,0.229,0.24258,0.18919,0.21784,0.1984,0.21523,0.22169,0.11397,0.11321,0.12031,0.11376,0.11347,0.10984,0.10875,0.11092,0.12228,0.11608,0.11415,0.11716,0.10422,0.1098,0.11588,0.11549,0.12029,0.05837,0.059347,0.057641,0.27824,0.21219,0.23725,0.26175,0.22007,0.24464,0.25253,0.21234,0.28761,0.24677,0.20444,0.21834,0.21562,0.23083,0.22835,0.11417,0.12267,0.11295,0.11517,0.11517,0.10817,0.11793,0.10559,0.11256,0.10642,0.11643,0.11486,0.12674,0.12143,0.11981,0.11876,0.11045,0.11351,0.058589,0.059814,0.058529,0.058706,0.2273,0.24087,0.23908,0.24717,0.27201,0.24136,0.23793,0.23522,0.21426,0.21884,0.23059,0.23262,0.12027,0.11347,0.14342,0.12674,0.11882,0.11388,0.11071,0.11194,0.12069,0.11543,0.11314,0.1191,0.11237,0.11792,0.1107,0.11698,0.11439,0.12318,0.11227,0.10205,0.057387,0.058578,0.058511,0.058637,0.060278,0.057701,0.22427,0.18936,0.25103,0.23702,0.23071,0.2856,0.28438,0.17404,0.11758,0.10333,0.11314,0.11306,0.11541,0.12022,0.13232,0.10811,0.11388,0.11559,0.10635,0.12002,0.11349,0.11288,0.10817,0.11233,0.11155,0.1157,0.10905,0.11425,0.12136,0.13069,0.12093,0.057236,0.059632,0.058787,0.057644,0.057103,0.060361,0.24491,0.18545,0.22363,0.25646,0.24227,0.058813,0.060174,0.113,0.12348,0.11235,0.11639,0.11306,0.11163,0.11385,0.11148,0.11024,0.11547,0.12287,0.11706,0.11447,0.12038,0.11637,0.13093,0.097105,0.11464,0.11528,0.1276,0.11076,0.058315,0.059169,0.058241,0.05927,0.058958,0.055944,0.059387,0.056425,0.057952,0.057475,0.24989,0.24478,0.059379,0.059656,0.056614,0.057825,0.11125,0.11488,0.094814,0.12544,0.10719,0.11463,0.11576,0.11423,0.12198,0.1234,0.11438,0.11213,0.12691,0.11342,0.13213,0.10563,0.10961,0.1147,0.11572,0.058947,0.060093,0.059022,0.058938,0.057959,0.061119,0.058754,0.059926,0.059103,0.05768,0.058137,0.058781,0.058332,0.059366,0.059375,0.060157,0.057429,0.11186,0.12853,0.12444,0.10535,0.12744,0.11674,0.11306,0.1232,0.10876,0.12412,0.11441,0.11286,0.11683,0.12457,0.13094,0.11801,0.058715,0.061062,0.057181,0.060431,0.058767,0.05778,0.060323,0.058153,0.058775,0.05985,0.056905,0.060018,0.05905,0.058958,0.058895,0.060072,0.056187,0.058036,0.058364,0.1125,0.11557,0.11403,0.10866,0.11613,0.1164,0.11522,0.1126,0.11485,0.1071,0.10662,0.11144,0.11195,0.057613,0.058509,0.057842,0.057344,0.059409,0.059353,0.061892,0.059803,0.059317,0.059314,0.057971,0.058168,0.057912,0.059792,0.059481,0.05745,0.057735,0.058304,0.060293,0.059953,0.057423,0.11299,0.13492,0.12201,0.11243,0.11119,0.11514,0.11786,0.12353,0.11321,0.057854,0.058225,0.05982,0.057052,0.056443,0.059485,0.059521,0.057945,0.0606,0.059406,0.06102,0.058472,0.056882,0.06052,0.061024,0.05853,0.059192,0.058398,0.058188,0.05726,0.059073,0.059888,0.056589,0.058944,0.057425,0.1064,0.11966,0.10657,0.11686,0.058324,0.058002,0.062791,0.058836,0.056656,0.060397,0.059092,0.058958,0.059977,0.058546,0.058823,0.057084,0.059362,0.057084,0.057701,0.060277,0.059645,0.059386,0.060713,0.058216,0.060461,0.059051,0.058041,0.05956,0.058557,0.057395,0.05858,0.057087,0.059518,0.06127,0.058048,0.058081,0.059456,0.059313,0.056893,0.057272,0.05995,0.05962,0.05477,0.058972,0.058315,0.059038,0.059447,0.058786,0.058438,0.056746,0.058394,0.059828,0.058936,0.058411,0.057636,0.059053,0.0583,0.058919,0.059705,0.059829,0.060012,0.058808,0.059111,0.058273,0.060049,0.058711,0.056433,0.058305,0.057605,0.058209,0.057157,0.057801,0.057493,0.05888,0.059618,0.059038,0.057537,0.058671,0.059216,0.059983,0.058783,0.06192,0.059554,0.060948,0.057004,0.059794,0.059481,0.058204,0.061218,0.060307,0.05917,0.059058,0.0

58242,0.057556,0.059409,0.060509,0.058566,0.059627,0.05959,0.057876,0.058706,0.05811,0.05869,0.058835,0.058375,0.05784,0.060339,0.058347,0.060062,0.060323,0.058575,0.057979,0.059193,0.062119,0.057071,0.058445,0.057078,0.059479,0.057987,0.060117,0.058832,0.058898,0.059435,0.060296,0.060048,0.061268,0.06159,0.058956,0.060344,0.059171,0.059498,0.05975,0.059046,0.059728,0.057232,0.057143,0.056464,0.061478,0.059366,0.058475,0.059562,0.062396,0.058248,0.059206,0.060529,0.060914,0.05791,0.060976,0.059342,0.059343,0.060373,0.058269,0.059813,0.057669,0.057696,0.058976,0.058819,0.059156,0.05986,0.057879,0.059886,0.05703,0.060831,0.059174,0.058036,0.05754,0.057272,0.058311,0.058854,0.058954,0.058152,0.061929,0.05803,0.05897,0.058079,0.057938,0.059618,0.059534,0.058345,0.058014,0.059784,0.058486,0.060656,0.059535,0.059735,0.058928,0.058471,0.057048,0.059394,0.057766,0.056075,0.058142,0.057719,0.057861,0.058078,0.058542,0.058806,0.058189,0.05903  
0.15459,0.1543,0.15638,0.15849,0.15754,0.1604,0.15576,0.15996,0.15853,0.15932,0.15786,0.15648,0.15987,0.15876,0.15674,0.15872,0.15606,0.1593,0.15368,0.15202,0.25932,0.26565,0.30167,0.29219,0.1568,0.15698,0.15692,0.15652,0.15729,0.15995,0.15861,0.15854,0.15848,0.15649,0.15724,0.1607,0.1539,0.15808,0.15444,0.37984,0.27098,0.28775,0.29217,0.30029,0.26854,0.27967,0.15821,0.15559,0.1562,0.15393,0.15687,0.15876,0.15652,0.15685,0.15884,0.15619,0.15703,0.15815,0.15847,0.15756,0.15549,0.40416,0.40461,0.25977,0.27901,0.27731,0.26899,0.26912,0.2807,0.27877,0.28411,0.15954,0.15628,0.15734,0.1559,0.15761,0.15981,0.15699,0.15518,0.15449,0.15623,0.15662,0.15787,0.15807,0.15819,0.15905,0.38146,0.40707,0.38569,0.27301,0.28494,0.31468,0.26733,0.28281,0.27015,0.26991,0.29056,0.28508,0.15658,0.15909,0.15925,0.15907,0.15751,0.15706,0.1582,0.15717,0.15727,0.15554,0.15617,0.15648,0.15874,0.15798,0.15796,0.16006,0.42885,0.38506,0.37785,0.39773,0.2913,0.27591,0.28407,0.27019,0.3045,0.27159,0.26794,0.26064,0.29716,0.27951,0.15598,0.15777,0.15604,0.15711,0.15804,0.15798,0.15722,0.15773,0.15718,0.1597,0.15483,0.15784,0.1574,0.1559,0.15463,0.15796,0.40733,0.42133,0.42294,0.37089,0.4195,0.44045,0.294,0.29148,0.28853,0.28579,0.26554,0.3065,0.29917,0.26937,0.28362,0.30874,0.15656,0.15661,0.15788,0.15518,0.15659,0.15722,0.15411,0.15793,0.15588,0.15608,0.15718,0.16019,0.1575,0.1578,0.15619,0.15974,0.15754,0.42362,0.39001,0.40724,0.40698,0.40171,0.40203,0.30305,0.27493,0.26879,0.29714,0.26625,0.2744,0.29948,0.25956,0.25542,0.29355,0.25314,0.15891,0.15719,0.15532,0.15809,0.15978,0.15593,0.15839,0.15775,0.15882,0.15646,0.16004,0.15924,0.15434,0.099404,0.10722,0.11178,0.15672,0.40942,0.41543,0.40316,0.44147,0.43546,0.43561,0.39932,0.27247,0.32674,0.27995,0.3123,0.291,0.29023,0.27812,0.27155,0.27588,0.28414,0.28458,0.1577,0.15926,0.15529,0.15807,0.1557,0.15638,0.16121,0.15873,0.1572,0.15783,0.15692,0.10285,0.1156,0.10518,0.10117,0.10588,0.1029,0.1602,0.40724,0.40318,0.40917,0.38143,0.39456,0.42679,0.41141,0.29238,0.31415,0.26908,0.26821,0.28542,0.31559,0.26637,0.26568,0.28905,0.30306,0.28353,0.15607,0.15987,0.15782,0.15775,0.1566,0.15632,0.15792,0.15446,0.1548,0.10395,0.10945,0.099397,0.10009,0.10625,0.1022,0.10909,0.10466,0.09795,0.15598,0.40087,0.4027,0.40898,0.44885,0.43182,0.38415,0.40754,0.30069,0.27417,0.29576,0.30258,0.26307,0.29037,0.25936,0.28104,0.26911,0.26858,0.27833,0.27348,0.15844,0.15619,0.15759,0.15833,0.15727,0.15655,0.10439,0.10628,0.11354,0.098694,0.10677,0.10638,0.096271,0.091648,0.10157,0.10493,0.1002,0.10832,0.41467,0.37087,0.40691,0.40418,0.39181,0.41102,0.38111,0.28365,0.29538,0.28764,0.27822,0.27933,0.28791,0.31748,0.2847,0.29

349,0.30212,0.30274,0.31058,0.15842,0.15583,0.15748,0.10689,0.085268,0.10313,0.09293,0.10273,0.10888,0.10815,0.10223,0.10325,0.094537,0.10363,0.10939,0.10332,0.10422,0.10591,0.41412,0.379,0.41872,0.39482,0.42985,0.40079,0.42049,0.38635,0.42208,0.28194,0.32505,0.2952,0.30037,0.27826,0.29339,0.30628,0.28008,0.32083,0.28396,0.28981,0.10665,0.099696,0.10583,0.10436,0.11394,0.10482,0.098139,0.10548,0.10505,0.104,0.10669,0.11558,0.10197,0.10809,0.10111,0.10611,0.097565,0.10657,0.39369,0.43193,0.39682,0.40062,0.39465,0.39193,0.38712,0.42145,0.37145,0.26749,0.29411,0.20122,0.20849,0.20339,0.2376,0.20665,0.20134,0.20565,0.19603,0.21412,0.10753,0.10458,0.11424,0.10442,0.10495,0.10469,0.10597,0.10665,0.10566,0.10154,0.10471,0.10317,0.11129,0.096748,0.10701,0.10523,0.10401,0.10425,0.40841,0.38472,0.42393,0.4277,0.40083,0.42183,0.42905,0.40749,0.41632,0.22439,0.20063,0.18249,0.21595,0.19279,0.20128,0.22656,0.19934,0.15886,0.19189,0.20356,0.10481,0.11124,0.10832,0.10306,0.096624,0.10711,0.1131,0.10394,0.10741,0.11104,0.082065,0.10423,0.10357,0.10478,0.10591,0.10499,0.10275,0.10525,0.43767,0.40727,0.44379,0.39806,0.39159,0.42469,0.39055,0.24113,0.27434,0.24007,0.1877,0.24344,0.20308,0.19506,0.19534,0.20511,0.22251,0.21001,0.21489,0.21315,0.10312,0.10557,0.11619,0.10967,0.10793,0.10956,0.10447,0.1011,0.10343,0.10519,0.10425,0.10697,0.10411,0.11958,0.099241,0.10477,0.10832,0.11899,0.40464,0.40181,0.39923,0.41431,0.41119,0.40644,0.23148,0.29046,0.20089,0.24671,0.20134,0.21086,0.20259,0.21715,0.16203,0.20921,0.20984,0.20599,0.21476,0.21043,0.097298,0.1026,0.11558,0.10057,0.10707,0.11164,0.10263,0.10778,0.095608,0.12826,0.10781,0.11356,0.10543,0.10317,0.095889,0.099536,0.10256,0.10605,0.41191,0.40174,0.39923,0.39989,0.43385,0.23417,0.24109,0.26792,0.22777,0.23144,0.23221,0.21923,0.19502,0.21209,0.20544,0.20499,0.22975,0.20305,0.1928,0.168,0.10276,0.11085,0.12083,0.099194,0.10802,0.10406,0.10275,0.10375,0.10984,0.10487,0.10767,0.10574,0.10636,0.1006,0.1079,0.10571,0.10478,0.12483,0.39062,0.39707,0.393,0.19195,0.23631,0.24982,0.20032,0.21435,0.24603,0.21524,0.19703,0.20677,0.221,0.17573,0.20583,0.1916,0.20033,0.21834,0.22869,0.21727,0.1155,0.10459,0.10213,0.10581,0.10683,0.10534,0.10417,0.10074,0.10601,0.10587,0.10519,0.09359,0.10635,0.10688,0.10448,0.10619,0.10606,0.1068,0.41284,0.2483,0.21269,0.23325,0.24158,0.23699,0.23005,0.21931,0.235,0.26804,0.20473,0.1937,0.21277,0.18665,0.22291,0.2054,0.22148,0.20573,0.19917,0.10405,0.10592,0.096084,0.097758,0.10424,0.10344,0.10056,0.11605,0.11098,0.10528,0.098844,0.10563,0.10896,0.10941,0.10588,0.10372,0.1036,0.052129,0.23956,0.18944,0.23109,0.24617,0.22917,0.23852,0.23464,0.21902,0.16437,0.24951,0.21566,0.20505,0.2041,0.20618,0.16418,0.20734,0.20249,0.20039,0.22978,0.10111,0.087973,0.099367,0.10541,0.12922,0.081405,0.11353,0.10189,0.10559,0.11069,0.10446,0.10709,0.10237,0.10395,0.11316,0.10318,0.10334,0.052378,0.2574,0.229,0.23189,0.22803,0.29816,0.26595,0.23482,0.22196,0.17362,0.253,0.22146,0.19582,0.19884,0.196,0.20983,0.22812,0.21823,0.20328,0.10499,0.10481,0.10135,0.11506,0.11112,0.10181,0.10371,0.10583,0.091287,0.11412,0.10723,0.10648,0.10575,0.10631,0.10443,0.1024,0.10563,0.1055,0.052508,0.25885,0.1757,0.26663,0.23467,0.22344,0.24069,0.20701,0.21369,0.20949,0.24233,0.204,0.2137,0.22633,0.18066,0.2078,0.18182,0.20319,0.21449,0.10493,0.10447,0.10935,0.10401,0.10346,0.099413,0.10045,0.10185,0.11179,0.10551,0.10455,0.10697,0.094961,0.10152,0.10641,0.10539,0.11037,0.051765,0.052634,0.05113,0.25966,0.19913,0.22245,0.24211,0.20945,0.22942,0.23732,0.19684,0.27211,0.22985,0.19264,0.2017,0.20004,0.21396,0.20968,0.1046,0.114,0.10479,0.10584,0.10491,0.10046,

0.10708,0.097502,0.10273,0.097016,0.10723,0.10552,0.11634,0.11217,0.11105,0.10881,0.10067,0.10483,0.052822,0.053843,0.052455,0.052097,0.2111,0.22317,0.22035,0.22608,0.25537,0.22972,0.223,0.21816,0.2031,0.20167,0.21088,0.21678,0.10989,0.10412,0.13137,0.11653,0.10749,0.1031,0.10158,0.1022,0.11035,0.10488,0.1038,0.11035,0.10239,0.10916,0.10004,0.10784,0.10555,0.11205,0.10254,0.093105,0.051437,0.05269,0.053296,0.052324,0.053732,0.050649,0.20759,0.17947,0.24055,0.22443,0.22033,0.26455,0.27355,0.15945,0.10868,0.094301,0.10368,0.10371,0.10542,0.11103,0.12191,0.097855,0.10414,0.10649,0.098017,0.10942,0.10352,0.10324,0.099501,0.10152,0.10257,0.10626,0.098941,0.1038,0.11047,0.12063,0.11132,0.051025,0.053376,0.052254,0.051502,0.051028,0.053972,0.23265,0.17789,0.20648,0.24263,0.22483,0.053475,0.053692,0.10371,0.1124,0.10314,0.10599,0.10381,0.10287,0.10404,0.10306,0.1008,0.10521,0.11196,0.10716,0.10412,0.11134,0.10618,0.11998,0.087718,0.10654,0.10515,0.118,0.10213,0.052902,0.052777,0.051241,0.053762,0.05242,0.050298,0.053496,0.051272,0.051868,0.051694,0.23524,0.22722,0.053435,0.052823,0.051291,0.052334,0.10309,0.10441,0.086759,0.11417,0.098914,0.10432,0.10707,0.10456,0.1112,0.11295,0.10516,0.10252,0.11542,0.10362,0.12139,0.096595,0.099965,0.10497,0.10556,0.053883,0.054014,0.052982,0.052559,0.051654,0.055049,0.052219,0.052695,0.053292,0.051794,0.052929,0.051244,0.051715,0.053657,0.052857,0.054343,0.051581,0.10215,0.11813,0.11394,0.096189,0.11607,0.1071,0.10414,0.11373,0.098929,0.1133,0.10535,0.10336,0.10735,0.11499,0.12109,0.1079,0.05317,0.054666,0.051217,0.053994,0.05346,0.052392,0.05478,0.049975,0.052317,0.05376,0.051008,0.05362,0.053575,0.053685,0.053586,0.053732,0.050569,0.052021,0.052977,0.103,0.1056,0.10426,0.099503,0.10587,0.10697,0.10461,0.10224,0.10509,0.097371,0.09739,0.10311,0.10279,0.051964,0.052727,0.051762,0.051473,0.053309,0.053507,0.054191,0.053866,0.053322,0.053844,0.051312,0.052022,0.052201,0.053171,0.053148,0.0507,0.052042,0.051365,0.053848,0.054152,0.052038,0.10394,0.12337,0.11223,0.1036,0.10125,0.10471,0.10763,0.11402,0.10395,0.052347,0.052064,0.053645,0.051391,0.050831,0.053909,0.053632,0.051194,0.053797,0.052596,0.054597,0.052771,0.05083,0.053681,0.054223,0.052753,0.052769,0.051947,0.051847,0.051966,0.053316,0.053351,0.052327,0.052746,0.051276,0.096153,0.10888,0.098329,0.10809,0.053147,0.051879,0.056502,0.052558,0.050881,0.05368,0.054225,0.052215,0.054251,0.052037,0.052458,0.050548,0.052861,0.050215,0.05164,0.053819,0.053726,0.052599,0.053953,0.050608,0.0535,0.053087,0.052822,0.052595,0.05314,0.051143,0.051698,0.051642,0.053575,0.054431,0.051888,0.052139,0.052546,0.053393,0.050234,0.051211,0.053365,0.053174,0.048599,0.053274,0.051221,0.053265,0.052812,0.052382,0.05161,0.051274,0.053013,0.053813,0.05372,0.05238,0.051791,0.053315,0.051955,0.05299,0.053072,0.054162,0.054193,0.053124,0.053551,0.052438,0.053719,0.053297,0.049227,0.051007,0.052308,0.051643,0.051641,0.051952,0.051115,0.052707,0.053722,0.052465,0.051221,0.052027,0.052557,0.053632,0.053161,0.055507,0.053137,0.05423,0.051923,0.053954,0.053128,0.051947,0.054647,0.052988,0.052922,0.052618,0.052543,0.051559,0.052338,0.055173,0.053544,0.053061,0.053252,0.052041,0.052039,0.05169,0.053142,0.05137,0.051076,0.051668,0.054121,0.052361,0.054192,0.054148,0.051525,0.051749,0.052788,0.055287,0.051221,0.05277,0.052054,0.05336,0.052196,0.052556,0.053142,0.05222,0.05373,0.055078,0.054433,0.055141,0.054608,0.053491,0.053903,0.053783,0.052813,0.052772,0.051855,0.053432,0.050277,0.050956,0.049715,0.055148,0.054234,0.052345,0.054106,0.05474,0.052161,0.052886,0.054267,0.055124,0.051857,0.054388,0.052623,0.053644,0.053433,0.05136

1, 0.0532, 0.051179, 0.051641, 0.052609, 0.052212, 0.052352, 0.054131, 0.05272  
8, 0.053407, 0.051836, 0.055109, 0.052291, 0.052504, 0.052139, 0.052383, 0.052  
308, 0.053102, 0.052431, 0.051783, 0.055803, 0.051484, 0.053199, 0.052419, 0.0  
51931, 0.053019, 0.053262, 0.052594, 0.052577, 0.053386, 0.053339, 0.053384, 0  
.052711, 0.054184, 0.052765, 0.053159, 0.051393, 0.053064, 0.051414, 0.050643  
, 0.051425, 0.052286, 0.051949, 0.052283, 0.05161, 0.05393, 0.052174, 0.052953  
0.14413, 0.14304, 0.14558, 0.14827, 0.14574, 0.14963, 0.14351, 0.14846, 0.1471  
9, 0.14877, 0.14613, 0.14614, 0.14761, 0.14743, 0.14499, 0.14676, 0.1438, 0.147  
68, 0.14235, 0.1412, 0.24879, 0.248, 0.28964, 0.28564, 0.1451, 0.14721, 0.1439,  
0.14465, 0.14624, 0.14918, 0.14573, 0.14692, 0.14799, 0.14498, 0.14751, 0.1497  
5, 0.14417, 0.14796, 0.14399, 0.36637, 0.26489, 0.27062, 0.27356, 0.28646, 0.25  
388, 0.27499, 0.14707, 0.14492, 0.14568, 0.14212, 0.14473, 0.1468, 0.14577, 0.1  
4573, 0.14849, 0.1463, 0.14504, 0.14843, 0.14727, 0.14653, 0.14408, 0.38947, 0.  
38883, 0.2437, 0.26673, 0.25668, 0.26082, 0.25534, 0.26694, 0.26153, 0.26219, 0  
.14696, 0.1451, 0.14483, 0.14492, 0.14629, 0.14882, 0.14643, 0.14257, 0.14309,  
0.14495, 0.14521, 0.14719, 0.1472, 0.14632, 0.1471, 0.35687, 0.40024, 0.37495,  
0.25915, 0.27478, 0.30358, 0.25344, 0.26658, 0.25898, 0.26133, 0.27511, 0.2704  
6, 0.14372, 0.14838, 0.14839, 0.14825, 0.14501, 0.14577, 0.14659, 0.14563, 0.14  
453, 0.14581, 0.1456, 0.14593, 0.14674, 0.14749, 0.14683, 0.14836, 0.40889, 0.3  
7279, 0.36874, 0.38923, 0.27984, 0.26052, 0.26965, 0.26028, 0.2915, 0.25819, 0.  
25544, 0.24441, 0.278, 0.26431, 0.14524, 0.14563, 0.1466, 0.14518, 0.14659, 0.1  
4646, 0.14655, 0.14662, 0.14542, 0.14899, 0.14424, 0.14628, 0.14741, 0.146, 0.1  
4472, 0.14594, 0.39538, 0.40996, 0.40812, 0.3617, 0.38934, 0.42433, 0.29001, 0.  
28163, 0.28026, 0.27306, 0.25377, 0.28965, 0.2846, 0.24966, 0.26937, 0.28931, 0  
.14584, 0.14485, 0.14646, 0.1441, 0.14627, 0.14513, 0.14252, 0.14529, 0.14541,  
0.1433, 0.14655, 0.14924, 0.14656, 0.14609, 0.14485, 0.14846, 0.14558, 0.40838  
, 0.38796, 0.39571, 0.39083, 0.36894, 0.37857, 0.28981, 0.25644, 0.2562, 0.2854  
6, 0.25232, 0.25963, 0.28862, 0.24701, 0.24202, 0.28567, 0.24442, 0.14841, 0.14  
69, 0.143, 0.1474, 0.14742, 0.14418, 0.1461, 0.14658, 0.14783, 0.14539, 0.15016  
, 0.14899, 0.14394, 0.091241, 0.099106, 0.10367, 0.14451, 0.39121, 0.39465, 0.3  
8913, 0.42716, 0.40744, 0.40787, 0.39383, 0.25426, 0.31813, 0.26268, 0.30257, 0  
.27688, 0.28228, 0.26321, 0.2608, 0.26159, 0.27218, 0.27161, 0.14679, 0.14791,  
0.14348, 0.14785, 0.14539, 0.14525, 0.14996, 0.14767, 0.14474, 0.14577, 0.1456  
7, 0.09495, 0.10744, 0.097953, 0.094437, 0.097053, 0.095502, 0.15003, 0.39517,  
0.38515, 0.38839, 0.36913, 0.38249, 0.40696, 0.40244, 0.2754, 0.29691, 0.25514  
, 0.24952, 0.26586, 0.30275, 0.25617, 0.25704, 0.2728, 0.28523, 0.27079, 0.1445  
6, 0.14762, 0.1461, 0.14604, 0.14571, 0.14535, 0.147, 0.14366, 0.14425, 0.09721  
2, 0.10113, 0.092901, 0.092669, 0.098249, 0.095157, 0.10047, 0.096192, 0.09174  
6, 0.14561, 0.38444, 0.38632, 0.40503, 0.42446, 0.40885, 0.37492, 0.39254, 0.27  
709, 0.27016, 0.28064, 0.29093, 0.25392, 0.2822, 0.24335, 0.26893, 0.25852, 0.2  
5023, 0.27349, 0.25831, 0.14662, 0.14471, 0.14524, 0.14643, 0.14571, 0.14662, 0  
.096422, 0.099434, 0.10465, 0.090771, 0.099681, 0.099801, 0.088841, 0.083895,  
0.093998, 0.097034, 0.093101, 0.10074, 0.39812, 0.35354, 0.40259, 0.39108, 0.3  
8182, 0.39399, 0.3673, 0.2714, 0.27946, 0.27553, 0.26038, 0.26841, 0.2768, 0.30  
317, 0.27686, 0.27482, 0.28362, 0.29109, 0.30472, 0.14817, 0.14395, 0.14662, 0.  
099298, 0.07973, 0.09645, 0.085686, 0.095832, 0.10135, 0.099433, 0.095647, 0.0  
9539, 0.087873, 0.096974, 0.10141, 0.09578, 0.097483, 0.097639, 0.39193, 0.372  
51, 0.39706, 0.37405, 0.40716, 0.38212, 0.39673, 0.38473, 0.39892, 0.26588, 0.3  
05, 0.2839, 0.28914, 0.26332, 0.28206, 0.29344, 0.26817, 0.29981, 0.27045, 0.27  
332, 0.098598, 0.092985, 0.097617, 0.095532, 0.10582, 0.096996, 0.09105, 0.096  
697, 0.09696, 0.096829, 0.098641, 0.10835, 0.094568, 0.099889, 0.094322, 0.098  
102, 0.090539, 0.0994, 0.38134, 0.41063, 0.3934, 0.37846, 0.39719, 0.38146, 0.3

8183,0.40661,0.36379,0.25382,0.2798,0.1901,0.20018,0.19276,0.22408,0.1  
9373,0.19562,0.19586,0.18669,0.20479,0.099449,0.097375,0.10657,0.09799  
1,0.097898,0.096398,0.098455,0.099303,0.097592,0.094216,0.097466,0.096  
108,0.10286,0.090235,0.098604,0.098281,0.096846,0.096053,0.38015,0.374  
64,0.40822,0.41041,0.38309,0.40535,0.4065,0.41211,0.39128,0.21292,0.18  
638,0.17176,0.19826,0.18045,0.19561,0.21552,0.18826,0.15182,0.18204,0.  
19227,0.098056,0.10366,0.099948,0.095303,0.08998,0.099501,0.10476,0.09  
523,0.099229,0.10264,0.075191,0.097031,0.096483,0.098081,0.099064,0.09  
9147,0.095172,0.097297,0.42561,0.39316,0.42601,0.39082,0.36504,0.41153  
,0.37654,0.23032,0.25827,0.22395,0.1772,0.22697,0.19521,0.18014,0.1853  
2,0.19564,0.20845,0.20148,0.20237,0.19727,0.096104,0.098585,0.10777,0.  
10218,0.1002,0.10167,0.095199,0.093535,0.095968,0.097629,0.096031,0.09  
9197,0.096542,0.11254,0.093422,0.098146,0.1002,0.11052,0.38788,0.37084  
,0.38512,0.40147,0.39559,0.37965,0.22336,0.28376,0.18511,0.23489,0.188  
29,0.20429,0.19057,0.20346,0.14922,0.19663,0.20026,0.19641,0.20537,0.1  
9916,0.091457,0.094724,0.10833,0.093111,0.09855,0.10449,0.09401,0.0997  
65,0.088736,0.11929,0.09925,0.10492,0.097483,0.095414,0.088369,0.09219  
,0.095537,0.099551,0.39216,0.39558,0.39837,0.38488,0.41907,0.2212,0.22  
991,0.25091,0.22207,0.21839,0.22049,0.2083,0.18623,0.20221,0.19707,0.1  
9089,0.22071,0.19369,0.18086,0.15919,0.095755,0.1033,0.1116,0.091865,0.  
.1001,0.096784,0.094258,0.097056,0.10236,0.097043,0.099557,0.099407,0.  
09819,0.092846,0.099709,0.098397,0.096908,0.11596,0.37321,0.37666,0.36  
855,0.18615,0.22624,0.24391,0.19282,0.20358,0.23299,0.19989,0.183,0.19  
601,0.20608,0.16604,0.20135,0.17973,0.18889,0.20016,0.21893,0.20444,0.  
10761,0.096726,0.094453,0.097106,0.098321,0.097276,0.095733,0.093949,0.  
.097322,0.098826,0.097003,0.087681,0.098507,0.098566,0.097119,0.098057  
,0.098634,0.098778,0.38315,0.22815,0.20284,0.23349,0.23707,0.22185,0.2  
1314,0.2058,0.22322,0.25582,0.19137,0.18073,0.20415,0.18133,0.20808,0.  
19765,0.21068,0.20152,0.18912,0.096944,0.097331,0.089451,0.091005,0.09  
7751,0.095909,0.093763,0.10878,0.10291,0.097553,0.092152,0.097702,0.10  
208,0.10122,0.098582,0.095515,0.095881,0.048361,0.23035,0.17645,0.2215  
4,0.23433,0.21755,0.22287,0.22272,0.20999,0.15384,0.23723,0.20138,0.20  
186,0.19753,0.19931,0.15639,0.1977,0.19217,0.19195,0.22375,0.094359,0.  
08102,0.092533,0.097267,0.11854,0.075263,0.10527,0.094398,0.099594,0.1  
0178,0.097543,0.099618,0.095502,0.096607,0.10503,0.094872,0.094307,0.0  
48622,0.24337,0.22139,0.21617,0.20491,0.28844,0.25615,0.22613,0.21225,  
0.16724,0.24247,0.20405,0.18137,0.19055,0.1834,0.19315,0.2133,0.20619,  
0.19614,0.097919,0.097258,0.094312,0.10578,0.10276,0.09423,0.096407,0.  
097518,0.084828,0.10564,0.10054,0.09954,0.098757,0.097738,0.097065,0.0  
96391,0.098478,0.096644,0.04829,0.25002,0.17191,0.25902,0.21914,0.2123  
4,0.23421,0.19475,0.20501,0.19792,0.22881,0.1927,0.20834,0.21732,0.170  
89,0.19688,0.17335,0.1917,0.20548,0.097468,0.096257,0.1016,0.095744,0.  
095024,0.092671,0.092435,0.094994,0.10314,0.097756,0.097824,0.099413,0.  
.087581,0.093122,0.098985,0.09743,0.10217,0.048182,0.048678,0.046715,0.  
.25195,0.19011,0.2223,0.22433,0.19891,0.22055,0.22448,0.18632,0.25334,  
0.21448,0.18203,0.18347,0.19017,0.20439,0.19966,0.097019,0.10725,0.097  
053,0.098231,0.096999,0.092949,0.099431,0.090318,0.095247,0.089283,0.1  
0023,0.097478,0.10776,0.10338,0.10368,0.10152,0.093538,0.097169,0.0488  
68,0.049324,0.048643,0.046769,0.21092,0.21434,0.21272,0.21928,0.2461,0.  
.22386,0.2137,0.20559,0.19096,0.19733,0.20469,0.20456,0.10157,0.096194  
,0.12186,0.10798,0.099958,0.095996,0.094775,0.09477,0.10221,0.098358,0.  
.096303,0.10135,0.09398,0.10043,0.093346,0.10025,0.097599,0.10271,0.09

4776,0.085867,0.047821,0.04898,0.048529,0.047801,0.049141,0.046524,0.2  
0857,0.17462,0.23275,0.20863,0.2032,0.26503,0.25595,0.15562,0.099655,0  
.08693,0.09694,0.095604,0.098755,0.10223,0.11372,0.091712,0.0973,0.097  
982,0.091769,0.10086,0.096075,0.096291,0.092416,0.0928,0.095006,0.0987  
06,0.091922,0.096623,0.10148,0.11173,0.10311,0.046815,0.048961,0.04758  
1,0.046731,0.046898,0.048979,0.2236,0.17178,0.19361,0.22239,0.21338,0.  
048905,0.049313,0.09586,0.10386,0.096031,0.098785,0.096153,0.09506,0.0  
97223,0.094822,0.093011,0.095654,0.10445,0.098824,0.097037,0.10359,0.0  
97387,0.11041,0.081146,0.09845,0.098133,0.109,0.094874,0.04898,0.04853  
6,0.046938,0.04965,0.047735,0.046263,0.050076,0.047199,0.047939,0.0475  
17,0.22799,0.21528,0.048963,0.049539,0.04751,0.049443,0.095762,0.09816  
2,0.07975,0.10693,0.092978,0.097742,0.099004,0.097244,0.10336,0.10518,  
0.096743,0.095415,0.1077,0.096391,0.11268,0.088995,0.091734,0.097169,0  
.098268,0.050145,0.049823,0.049083,0.048089,0.047293,0.050329,0.048154  
,0.048876,0.049046,0.047675,0.048801,0.048226,0.047826,0.049769,0.0480  
95,0.049518,0.047443,0.094085,0.10957,0.1054,0.089028,0.10646,0.098922  
,0.097029,0.10486,0.0909,0.10553,0.097559,0.095697,0.1002,0.10643,0.11  
167,0.10009,0.049321,0.050062,0.047563,0.050086,0.048691,0.048321,0.05  
0795,0.04678,0.048487,0.049603,0.047059,0.049544,0.049741,0.048813,0.0  
48052,0.048744,0.04669,0.048223,0.048041,0.09522,0.098577,0.096746,0.0  
92639,0.098952,0.098808,0.096504,0.095067,0.097474,0.090545,0.091119,0  
.095113,0.095148,0.047386,0.047867,0.047425,0.047218,0.049307,0.049683  
,0.049691,0.049588,0.048705,0.049627,0.047511,0.048348,0.047208,0.0486  
75,0.049295,0.047058,0.047276,0.048517,0.050196,0.050049,0.048471,0.09  
6857,0.11432,0.10285,0.096011,0.092719,0.096839,0.099477,0.10691,0.096  
282,0.048118,0.047576,0.049413,0.04694,0.046916,0.049709,0.050264,0.04  
7752,0.049117,0.049042,0.049522,0.048737,0.046834,0.050367,0.049634,0.  
048087,0.048221,0.047525,0.047935,0.048055,0.049787,0.048591,0.048576,  
0.048188,0.047416,0.090128,0.10107,0.091254,0.099012,0.048329,0.048112  
,0.053232,0.048967,0.046918,0.048812,0.049527,0.048342,0.05044,0.04792  
5,0.048579,0.047162,0.0479,0.045174,0.047223,0.049015,0.049552,0.04789  
5,0.049252,0.0462,0.049597,0.048766,0.047038,0.049039,0.048865,0.04705  
5,0.048187,0.047483,0.048671,0.050201,0.04717,0.04883,0.047804,0.04930  
3,0.046472,0.046862,0.048347,0.04865,0.044289,0.048,0.047713,0.048728,  
0.049099,0.047544,0.046794,0.047442,0.049919,0.049623,0.049578,0.04903  
7,0.048234,0.048786,0.048392,0.049167,0.048423,0.049722,0.049775,0.048  
788,0.04984,0.048543,0.049511,0.04852,0.046468,0.047044,0.047191,0.048  
245,0.047809,0.047182,0.046551,0.049258,0.049702,0.049163,0.047897,0.0  
48541,0.048139,0.050467,0.049826,0.050569,0.050002,0.050776,0.047697,0  
.048783,0.049578,0.048527,0.050261,0.048505,0.048477,0.049081,0.048269  
,0.047029,0.047821,0.049853,0.04941,0.049598,0.048958,0.047998,0.04703  
2,0.047874,0.04929,0.047175,0.046911,0.047909,0.050003,0.047157,0.0501  
03,0.050469,0.046836,0.04659,0.047836,0.050856,0.046753,0.048747,0.048  
938,0.049133,0.04872,0.04927,0.048634,0.047845,0.048905,0.050747,0.049  
366,0.050828,0.049721,0.049353,0.050315,0.049728,0.048184,0.048523,0.0  
46816,0.049536,0.046215,0.04647,0.045452,0.050423,0.049222,0.048026,0.  
049442,0.050876,0.047175,0.047561,0.05011,0.050426,0.047535,0.049146,0  
.048904,0.047927,0.050511,0.047606,0.048509,0.046841,0.047593,0.048295  
,0.048342,0.048029,0.050695,0.048448,0.050035,0.046963,0.050649,0.0476  
65,0.049139,0.047948,0.047713,0.048254,0.049362,0.047075,0.047491,0.05  
0254,0.047263,0.049162,0.04839,0.04845,0.048827,0.049138,0.049037,0.04  
9273,0.049051,0.049231,0.049631,0.050302,0.050056,0.048275,0.048125,0.

047685,0.048498,0.047287,0.047425,0.047568,0.048213,0.047925,0.047169,  
0.047486,0.048787,0.046979,0.04961  
0.1333,0.13334,0.13551,0.13881,0.13734,0.14047,0.1346,0.13948,0.13903,  
0.13906,0.13614,0.13717,0.13965,0.13779,0.13556,0.13649,0.13431,0.1372  
1,0.13522,0.13223,0.24029,0.2376,0.2838,0.27487,0.13676,0.13788,0.1341  
3,0.13567,0.13627,0.13813,0.1363,0.13617,0.1385,0.13518,0.13732,0.1405  
8,0.13444,0.13812,0.13314,0.34968,0.26319,0.26038,0.26501,0.27233,0.24  
324,0.25708,0.13719,0.13651,0.13471,0.13354,0.13417,0.13781,0.1361,0.1  
3587,0.1389,0.13604,0.13683,0.13803,0.13808,0.13635,0.13523,0.38042,0.  
38072,0.23159,0.25616,0.2448,0.26345,0.24571,0.25358,0.25327,0.251,0.1  
3619,0.13656,0.13648,0.13654,0.13706,0.13986,0.13683,0.13385,0.13471,0  
.13615,0.13591,0.13654,0.13674,0.13731,0.13773,0.34883,0.38427,0.36242  
,0.25049,0.2657,0.29706,0.2352,0.25159,0.24752,0.25346,0.26625,0.26523  
,0.13417,0.13765,0.13849,0.13854,0.13604,0.13669,0.13704,0.13664,0.135  
8,0.137,0.13651,0.13678,0.13719,0.13879,0.13737,0.13795,0.4002,0.36697  
,0.36633,0.38182,0.27195,0.25008,0.26024,0.25056,0.28032,0.24628,0.243  
35,0.229,0.27136,0.24889,0.13596,0.13584,0.13708,0.13646,0.13681,0.137  
18,0.13771,0.13728,0.13619,0.13849,0.13474,0.13782,0.13854,0.13678,0.1  
3361,0.1353,0.38841,0.41162,0.40794,0.34842,0.38531,0.4068,0.27245,0.2  
7686,0.26142,0.26177,0.24288,0.28471,0.27577,0.23471,0.26096,0.28045,0  
.13647,0.13513,0.13672,0.1345,0.13775,0.13522,0.13342,0.13517,0.13497,  
0.13485,0.13626,0.1399,0.13765,0.13568,0.13728,0.13964,0.13812,0.39266  
,0.36865,0.38415,0.37274,0.3595,0.36182,0.28299,0.23998,0.25443,0.2714  
7,0.24279,0.25367,0.27941,0.24223,0.23365,0.27554,0.23352,0.13772,0.13  
622,0.13414,0.13887,0.13813,0.13432,0.1363,0.13575,0.13873,0.13715,0.1  
3938,0.14027,0.13506,0.086839,0.093344,0.09803,0.13513,0.37548,0.3757,  
0.38416,0.41021,0.38913,0.38983,0.3786,0.24365,0.31452,0.25221,0.29408  
,0.27173,0.27344,0.24769,0.25625,0.25364,0.27203,0.25989,0.13693,0.138  
24,0.13524,0.13727,0.13775,0.13582,0.14091,0.13818,0.13493,0.13588,0.1  
3721,0.089181,0.10009,0.091972,0.08807,0.091224,0.088907,0.14047,0.388  
38,0.37549,0.37265,0.36831,0.37947,0.39633,0.38293,0.26204,0.28622,0.2  
4399,0.23417,0.24755,0.29086,0.24198,0.2443,0.25817,0.26791,0.25709,0.  
13436,0.13935,0.13783,0.13693,0.13642,0.13654,0.13753,0.1349,0.13492,0  
.090758,0.094493,0.086105,0.087375,0.091131,0.089153,0.094463,0.08942,  
0.086364,0.13584,0.37228,0.3912,0.39645,0.42529,0.39698,0.35279,0.3866  
3,0.26784,0.2604,0.26379,0.27963,0.24281,0.27558,0.2362,0.25867,0.2476  
7,0.2392,0.26138,0.25013,0.1372,0.13548,0.13602,0.1368,0.13654,0.13639  
,0.090095,0.093513,0.097846,0.084223,0.093114,0.093531,0.084073,0.0793  
12,0.087389,0.092033,0.085414,0.094339,0.37733,0.34165,0.39248,0.37938  
,0.37373,0.37483,0.34688,0.24702,0.27035,0.26934,0.25746,0.25762,0.271  
65,0.29064,0.26059,0.26615,0.27757,0.27909,0.29508,0.13806,0.13452,0.1  
3685,0.092791,0.075532,0.089952,0.080862,0.08942,0.09502,0.092501,0.09  
052,0.090137,0.082268,0.091629,0.09559,0.088859,0.091849,0.091705,0.38  
052,0.3481,0.38674,0.37117,0.39966,0.36906,0.38715,0.37288,0.38385,0.2  
576,0.29793,0.2764,0.27612,0.24919,0.27682,0.28243,0.26432,0.29089,0.2  
6305,0.26526,0.091707,0.086508,0.091472,0.089953,0.099154,0.090358,0.0  
85215,0.090282,0.09121,0.091428,0.092341,0.10101,0.088534,0.0936,0.089  
031,0.091923,0.085493,0.092898,0.36075,0.39594,0.3877,0.36857,0.3883,0  
.39013,0.38309,0.39435,0.35157,0.2342,0.27259,0.18079,0.18934,0.18327,  
0.21549,0.18368,0.18962,0.18404,0.18604,0.19542,0.092129,0.091681,0.09  
8854,0.090481,0.090752,0.089973,0.091881,0.093705,0.091584,0.088989,0.  
091195,0.089155,0.096955,0.085371,0.092941,0.092356,0.091068,0.089967,



0.36384,0.37246,0.39292,0.39715,0.37041,0.40784,0.40515,0.40694,0.3833  
2,0.2054,0.18093,0.16425,0.19608,0.17786,0.19064,0.19989,0.18263,0.144  
53,0.17645,0.1811,0.092312,0.096896,0.093369,0.089633,0.083985,0.09360  
8,0.09789,0.089681,0.093063,0.095404,0.069914,0.09039,0.091632,0.09024  
8,0.093414,0.093711,0.088433,0.090788,0.42272,0.39173,0.40747,0.37253,  
0.34182,0.38662,0.36939,0.23225,0.24342,0.22049,0.1707,0.22029,0.18281  
,0.17541,0.17509,0.18866,0.19384,0.19867,0.19029,0.19169,0.089596,0.09  
2653,0.10095,0.094598,0.09336,0.094997,0.090461,0.087513,0.08908,0.090  
749,0.09008,0.092306,0.090187,0.10567,0.087254,0.092972,0.094861,0.105  
66,0.37509,0.37129,0.3802,0.39464,0.38233,0.37363,0.21362,0.27479,0.17  
814,0.23285,0.18068,0.19554,0.18175,0.19426,0.14054,0.1953,0.19641,0.1  
8662,0.1923,0.18944,0.085583,0.088945,0.10147,0.087298,0.092945,0.0975  
12,0.088057,0.093303,0.08427,0.11181,0.093024,0.098384,0.090274,0.0887  
49,0.0821,0.086274,0.090363,0.093966,0.3897,0.38954,0.38484,0.38082,0.  
406,0.21129,0.22258,0.249,0.21102,0.20279,0.21384,0.20104,0.18399,0.19  
462,0.19314,0.18621,0.21853,0.18984,0.17149,0.1497,0.089943,0.096387,0.  
.10433,0.08706,0.092793,0.089763,0.08882,0.091294,0.095378,0.091079,0.  
093464,0.094173,0.091513,0.085557,0.093747,0.09201,0.091739,0.1086,0.3  
568,0.3644,0.36381,0.18351,0.21878,0.23894,0.17994,0.19794,0.23137,0.1  
9319,0.18553,0.18759,0.19326,0.16221,0.18883,0.168,0.18106,0.19038,0.2  
0991,0.19334,0.10107,0.092287,0.087476,0.091169,0.092245,0.091428,0.09  
0722,0.086472,0.090912,0.092765,0.091382,0.081855,0.092037,0.091146,0.  
091858,0.090516,0.093755,0.092642,0.38084,0.2202,0.19548,0.22999,0.231  
69,0.2146,0.20782,0.19456,0.21636,0.25108,0.17997,0.17242,0.1946,0.169  
46,0.2016,0.19408,0.20544,0.19241,0.17806,0.091622,0.091449,0.085215,0.  
.085175,0.092014,0.090308,0.08848,0.10175,0.095671,0.091066,0.08714,0.  
09283,0.095703,0.095248,0.092078,0.089542,0.089736,0.046101,0.21919,0.  
17152,0.21762,0.22151,0.20744,0.21497,0.21366,0.20443,0.1506,0.23552,0.  
.19546,0.19356,0.18858,0.19055,0.14782,0.19269,0.18008,0.18246,0.21122  
,0.088311,0.075862,0.085927,0.090068,0.11114,0.071196,0.097677,0.08892  
4,0.092942,0.096118,0.091493,0.092826,0.089211,0.090587,0.098499,0.087  
867,0.089338,0.045747,0.24129,0.22159,0.20668,0.19762,0.27553,0.23951,  
0.22547,0.20732,0.16036,0.22712,0.20087,0.17708,0.18487,0.17534,0.1894  
1,0.20494,0.19735,0.18942,0.090837,0.089889,0.087921,0.097583,0.09597,  
0.088422,0.090561,0.091348,0.080362,0.099011,0.094415,0.093284,0.09220  
2,0.091385,0.090614,0.089968,0.092166,0.090941,0.045529,0.25271,0.1674  
2,0.24337,0.2156,0.20273,0.22548,0.19453,0.20149,0.19335,0.2236,0.1815  
7,0.19858,0.20926,0.16203,0.19186,0.16489,0.18101,0.19773,0.090743,0.0  
90861,0.094608,0.089561,0.089083,0.08877,0.086998,0.088949,0.09744,0.0  
91825,0.092773,0.093917,0.082391,0.088302,0.092926,0.091046,0.096193,0.  
.044633,0.046154,0.044081,0.23726,0.1839,0.2121,0.21379,0.18947,0.2139  
4,0.22461,0.18241,0.2478,0.21246,0.17617,0.17441,0.18026,0.19498,0.190  
02,0.091557,0.1,0.091274,0.092397,0.090538,0.086637,0.092904,0.083717,  
0.090057,0.084071,0.094267,0.091948,0.10107,0.096192,0.09674,0.095581,  
0.08687,0.091446,0.045599,0.046019,0.047161,0.043427,0.20502,0.20824,0.  
.21382,0.21017,0.2396,0.22302,0.20153,0.20547,0.18985,0.18829,0.194,0.  
19347,0.095111,0.090397,0.11565,0.10238,0.093244,0.091223,0.089646,0.0  
89485,0.096077,0.09241,0.089259,0.095478,0.089209,0.094146,0.086507,0.  
092866,0.090805,0.097897,0.088824,0.08019,0.045617,0.045548,0.045415,0.  
.045187,0.046107,0.043659,0.20433,0.17374,0.22275,0.2005,0.19223,0.258  
08,0.25531,0.14785,0.093984,0.082112,0.090483,0.088131,0.092669,0.0961  
95,0.10753,0.086032,0.091931,0.092597,0.086786,0.094019,0.089946,0.090

389,0.086057,0.087337,0.089633,0.092513,0.08656,0.091541,0.095007,0.10  
54,0.096525,0.04435,0.046185,0.04461,0.044308,0.042985,0.047541,0.2138  
8,0.15828,0.18864,0.21189,0.19836,0.045701,0.047372,0.090279,0.096497,  
0.089338,0.093057,0.089076,0.088866,0.091844,0.090251,0.086828,0.08996  
3,0.098561,0.091803,0.090496,0.096423,0.090391,0.10279,0.076127,0.0913  
74,0.092969,0.10333,0.089036,0.046947,0.045413,0.044596,0.046152,0.044  
553,0.0435,0.047353,0.044915,0.044872,0.04525,0.22075,0.20756,0.04579,  
0.047111,0.044594,0.045849,0.089178,0.092936,0.074034,0.099737,0.08714  
2,0.092221,0.093309,0.091,0.097612,0.098677,0.090506,0.089861,0.1005,0  
.09095,0.1055,0.083014,0.086192,0.088889,0.092413,0.047727,0.047733,0.  
045353,0.045597,0.044048,0.047581,0.044862,0.045608,0.046117,0.045263,  
0.046514,0.045695,0.044744,0.046621,0.044644,0.046528,0.044551,0.08819  
5,0.10267,0.098191,0.082531,0.099098,0.091655,0.090443,0.098379,0.0855  
92,0.099492,0.091297,0.090902,0.094918,0.10003,0.10378,0.093847,0.0468  
93,0.046463,0.04414,0.046831,0.046288,0.046027,0.047395,0.045462,0.045  
425,0.047003,0.044589,0.046882,0.047078,0.045705,0.045226,0.045348,0.0  
43953,0.045174,0.045103,0.089526,0.091445,0.090773,0.087685,0.093122,0  
.092504,0.089891,0.089669,0.090977,0.084796,0.086072,0.087885,0.088875  
,0.044401,0.045489,0.044962,0.044325,0.045901,0.046368,0.047005,0.0470  
44,0.044741,0.047342,0.044622,0.045142,0.044475,0.045508,0.04691,0.044  
561,0.044952,0.04721,0.047125,0.047557,0.045409,0.089779,0.10693,0.096  
726,0.090309,0.086831,0.092202,0.093733,0.1011,0.089047,0.045725,0.044  
8,0.047124,0.044543,0.044127,0.046758,0.04705,0.044789,0.04529,0.04714  
4,0.046096,0.044804,0.042849,0.047285,0.046664,0.045994,0.045943,0.044  
54,0.045518,0.044891,0.0467,0.046619,0.046406,0.044701,0.044754,0.0843  
57,0.09533,0.085508,0.092538,0.045459,0.046603,0.049738,0.046661,0.044  
5,0.044802,0.047022,0.045153,0.047879,0.044781,0.046605,0.043623,0.045  
178,0.042024,0.044644,0.046443,0.047136,0.044814,0.046838,0.04396,0.04  
687,0.04579,0.044561,0.044787,0.046406,0.045189,0.046125,0.044681,0.04  
6436,0.047064,0.044488,0.045739,0.044354,0.046139,0.043698,0.045222,0.  
045762,0.046069,0.040601,0.04455,0.045548,0.045969,0.046373,0.044478,0  
.043756,0.043911,0.046256,0.046461,0.046821,0.045711,0.045016,0.045776  
,0.045616,0.045402,0.044967,0.046609,0.046796,0.045602,0.047238,0.0456  
78,0.047027,0.04519,0.043719,0.044604,0.044265,0.045135,0.045663,0.045  
543,0.04368,0.046285,0.04765,0.045686,0.044877,0.045964,0.045436,0.046  
673,0.04693,0.047866,0.047511,0.048314,0.044885,0.045459,0.047023,0.04  
5099,0.048114,0.045823,0.04565,0.046402,0.045084,0.044665,0.044969,0.0  
46422,0.045701,0.046344,0.045667,0.045952,0.044605,0.045193,0.04576,0.  
044514,0.044042,0.045229,0.047155,0.043798,0.046554,0.046911,0.044196,  
0.045173,0.04492,0.047749,0.044113,0.045866,0.046481,0.045614,0.045462  
,0.045984,0.045412,0.046336,0.04657,0.047168,0.046807,0.04773,0.046577  
,0.046073,0.048023,0.045987,0.046304,0.045438,0.043782,0.046957,0.0437  
29,0.043219,0.04356,0.047958,0.045926,0.046151,0.046481,0.047336,0.044  
769,0.044905,0.046373,0.04777,0.044721,0.045581,0.046169,0.045106,0.04  
654,0.043934,0.045408,0.044035,0.044835,0.045235,0.046,0.044926,0.0474  
5,0.04679,0.047136,0.044208,0.046994,0.044556,0.04539,0.045412,0.04445  
8,0.045504,0.047074,0.044223,0.044507,0.048102,0.044215,0.047064,0.045  
7,0.045121,0.046221,0.045726,0.045865,0.0458,0.046107,0.045541,0.04636  
9,0.047211,0.047213,0.045284,0.045015,0.045247,0.045353,0.044667,0.044  
137,0.045484,0.045374,0.045613,0.04497,0.044771,0.045666,0.044069,0.04  
7113

0.12696,0.12564,0.12796,0.13261,0.1294,0.13112,0.12605,0.13164,0.13032  
,0.13107,0.12933,0.12933,0.13284,0.13155,0.12883,0.13024,0.12733,0.130  
37,0.128,0.12388,0.2361,0.22504,0.27292,0.26699,0.12996,0.13094,0.1265  
3,0.12743,0.12846,0.13077,0.1277,0.12899,0.13045,0.12707,0.12972,0.133  
07,0.12765,0.13025,0.12462,0.35122,0.25656,0.25676,0.25907,0.268,0.234  
56,0.25534,0.12739,0.12856,0.12795,0.12697,0.12799,0.12963,0.12702,0.1  
282,0.13032,0.12709,0.12887,0.12977,0.12923,0.12768,0.12934,0.36566,0.  
38335,0.22417,0.24906,0.23913,0.24552,0.2444,0.24821,0.24551,0.24736,0.  
.12802,0.12791,0.12835,0.12801,0.12919,0.13168,0.12934,0.12522,0.12799  
,0.12894,0.1271,0.1267,0.12916,0.12939,0.1298,0.35381,0.37401,0.35387,  
0.2391,0.25254,0.29257,0.22286,0.25065,0.24011,0.23762,0.25586,0.25485  
,0.12741,0.12912,0.13061,0.13065,0.1287,0.12854,0.13038,0.12934,0.1277  
5,0.12814,0.12832,0.12963,0.12931,0.13192,0.12901,0.1302,0.38981,0.370  
77,0.36198,0.36841,0.26383,0.24702,0.25408,0.24705,0.26973,0.23958,0.2  
3508,0.21618,0.26633,0.22908,0.12956,0.1273,0.12984,0.12843,0.12987,0.  
12987,0.13022,0.12982,0.12909,0.13085,0.12676,0.13188,0.12976,0.12861,  
0.12693,0.12875,0.3747,0.39944,0.39435,0.33818,0.38258,0.39801,0.26283  
,0.26484,0.25782,0.24945,0.23247,0.28476,0.26092,0.23792,0.25331,0.274  
93,0.12998,0.12746,0.12828,0.12604,0.12856,0.1266,0.12497,0.12736,0.12  
857,0.12672,0.12895,0.13174,0.12933,0.12752,0.12921,0.13249,0.12983,0.  
39178,0.34928,0.37932,0.35903,0.35144,0.35162,0.27559,0.23065,0.23742,  
0.25986,0.2388,0.25216,0.27654,0.23115,0.22341,0.26757,0.22871,0.1296,  
0.12994,0.12558,0.12998,0.12911,0.12701,0.12752,0.12941,0.13,0.13002,0  
.1316,0.13175,0.12699,0.082785,0.08857,0.091552,0.12789,0.38164,0.3774  
7,0.36641,0.40596,0.38866,0.38467,0.37539,0.23247,0.30584,0.24381,0.28  
847,0.26029,0.26663,0.24563,0.25632,0.24007,0.26133,0.25143,0.1286,0.1  
3034,0.12664,0.12966,0.13045,0.12812,0.13202,0.13092,0.12758,0.12834,0  
.12901,0.084116,0.095065,0.087265,0.083304,0.086248,0.085444,0.13211,0  
.38896,0.36905,0.37421,0.36249,0.3784,0.38987,0.38213,0.25187,0.27719,  
0.23784,0.22968,0.24142,0.27768,0.23758,0.2346,0.24868,0.25872,0.2525,  
0.12592,0.13051,0.13012,0.1314,0.12836,0.12842,0.12955,0.12595,0.12664  
,0.086706,0.090048,0.080976,0.08245,0.086973,0.084614,0.089436,0.08541  
2,0.082297,0.12854,0.36698,0.3742,0.37336,0.41899,0.39399,0.34497,0.37  
696,0.26497,0.25175,0.24947,0.27236,0.23646,0.26977,0.23559,0.25635,0.  
24486,0.22843,0.25521,0.24015,0.1305,0.12814,0.12756,0.12893,0.12807,0  
.12841,0.085922,0.088986,0.09259,0.079631,0.087264,0.088731,0.079778,0  
.074808,0.081404,0.087649,0.081505,0.089207,0.38459,0.34941,0.38051,0.  
37726,0.37243,0.36467,0.34865,0.23777,0.26629,0.26117,0.25104,0.25124,  
0.25986,0.28878,0.2606,0.25769,0.26941,0.26741,0.28773,0.13121,0.12611  
,0.12883,0.087583,0.070919,0.085499,0.076836,0.085797,0.089856,0.08822  
6,0.085461,0.084851,0.076873,0.086182,0.090403,0.084512,0.087039,0.088  
046,0.35774,0.34416,0.3814,0.35942,0.40057,0.36259,0.39589,0.35776,0.3  
8971,0.24286,0.28688,0.27032,0.27137,0.24958,0.26458,0.28042,0.25587,0  
.28664,0.25503,0.25395,0.086941,0.081398,0.086574,0.085703,0.09398,0.0  
86545,0.081408,0.085291,0.086231,0.087034,0.087241,0.095786,0.084941,0  
.089067,0.083387,0.086469,0.080826,0.088416,0.34575,0.37628,0.37052,0.  
35855,0.37639,0.38059,0.36722,0.38806,0.3444,0.22608,0.25566,0.17117,0  
.18808,0.17872,0.2088,0.18339,0.18286,0.18181,0.18157,0.19135,0.086425  
,0.086436,0.093163,0.084379,0.085545,0.086274,0.086937,0.087845,0.0870  
72,0.084161,0.086195,0.084102,0.090681,0.08081,0.087254,0.0868,0.08676  
4,0.085871,0.36016,0.3562,0.3723,0.40123,0.36336,0.40312,0.39858,0.384  
79,0.37204,0.19341,0.177,0.15711,0.19456,0.17022,0.18509,0.18591,0.175

18,0.1397,0.16714,0.17442,0.086783,0.091941,0.087345,0.085488,0.079779  
,0.087898,0.092788,0.085065,0.088305,0.090324,0.065961,0.085615,0.0872  
91,0.085953,0.088748,0.089631,0.084281,0.086474,0.41148,0.38356,0.3950  
2,0.35972,0.34491,0.38966,0.37281,0.22142,0.23506,0.21707,0.16433,0.21  
761,0.18051,0.16955,0.1712,0.18363,0.18713,0.18863,0.18121,0.18865,0.0  
8512,0.087405,0.094823,0.089765,0.088028,0.091384,0.085475,0.082285,0.  
084061,0.086599,0.084976,0.086642,0.086785,0.10024,0.083063,0.087884,0  
.089506,0.099925,0.37978,0.36757,0.3796,0.39982,0.36363,0.38529,0.2010  
1,0.28003,0.18142,0.22541,0.18294,0.18526,0.17412,0.19401,0.13655,0.18  
968,0.19372,0.17408,0.18868,0.18272,0.080683,0.084516,0.095137,0.08265  
4,0.088895,0.09247,0.083096,0.087307,0.080764,0.10653,0.088151,0.09337  
3,0.085883,0.083513,0.077499,0.081108,0.084711,0.088266,0.38507,0.3769  
,0.37494,0.3775,0.39862,0.21206,0.21435,0.24691,0.20515,0.20024,0.2059  
9,0.19297,0.18014,0.19335,0.18489,0.17943,0.21011,0.18364,0.16734,0.14  
474,0.086005,0.091029,0.097278,0.082571,0.089701,0.086279,0.085216,0.0  
86527,0.08976,0.086015,0.087659,0.08885,0.08703,0.082113,0.087533,0.08  
7235,0.08619,0.10248,0.34068,0.35629,0.37659,0.18067,0.2075,0.23705,0.  
17847,0.19424,0.22263,0.18518,0.18651,0.18311,0.18733,0.15474,0.17951,  
0.16242,0.17788,0.18686,0.19383,0.18777,0.096468,0.088091,0.082754,0.0  
85614,0.087468,0.086224,0.0858,0.081408,0.086727,0.087562,0.085834,0.0  
77385,0.087316,0.086195,0.086672,0.084588,0.088708,0.088369,0.37663,0.  
22055,0.19573,0.21754,0.22419,0.2141,0.20569,0.19076,0.21206,0.24068,0  
.17302,0.16822,0.1904,0.16468,0.19487,0.18822,0.20015,0.18661,0.16879,  
0.086774,0.087208,0.081502,0.079899,0.086054,0.085886,0.084846,0.09576  
7,0.090868,0.086047,0.081938,0.087424,0.090596,0.090023,0.087784,0.084  
219,0.08493,0.04292,0.21501,0.17032,0.20934,0.22019,0.20527,0.20628,0.  
20412,0.20551,0.14569,0.23631,0.18901,0.18683,0.18459,0.18524,0.14326,  
0.18668,0.17283,0.18072,0.20297,0.083018,0.072532,0.081906,0.086124,0.  
1044,0.066744,0.092902,0.084105,0.087605,0.091216,0.086136,0.088291,0.  
08374,0.085992,0.093856,0.08401,0.084968,0.044323,0.23521,0.2168,0.205  
96,0.19376,0.28067,0.23403,0.21506,0.19868,0.15736,0.22896,0.19657,0.1  
7334,0.17697,0.16805,0.18388,0.19925,0.18603,0.18349,0.08585,0.085294,  
0.084213,0.092955,0.091121,0.083732,0.086003,0.086553,0.075022,0.09251  
,0.088836,0.088129,0.087091,0.085828,0.085565,0.085352,0.087919,0.0860  
28,0.043278,0.24245,0.16167,0.23695,0.21079,0.19908,0.21754,0.18922,0.  
19847,0.19449,0.21384,0.17196,0.18889,0.20028,0.15239,0.1877,0.1599,0.  
17612,0.19449,0.086048,0.085341,0.089359,0.085535,0.082836,0.083551,0.  
0836,0.084634,0.092718,0.086628,0.087747,0.088908,0.078542,0.084125,0.  
087546,0.086634,0.09065,0.043282,0.043604,0.042128,0.24048,0.18192,0.2  
0866,0.20618,0.17908,0.20689,0.2136,0.17927,0.24528,0.20597,0.16812,0.  
16925,0.16936,0.18618,0.18482,0.086402,0.094961,0.086573,0.087886,0.08  
5088,0.081408,0.087613,0.079387,0.085909,0.08038,0.088964,0.086744,0.0  
95531,0.090598,0.092916,0.089201,0.082411,0.086292,0.043403,0.044571,0  
.045002,0.040996,0.19938,0.20322,0.20694,0.20993,0.23026,0.21896,0.196  
79,0.2007,0.1885,0.18518,0.19014,0.19196,0.090535,0.085072,0.10959,0.0  
97818,0.089059,0.08496,0.085524,0.085584,0.091119,0.088352,0.084618,0.  
089073,0.084595,0.088827,0.082714,0.087825,0.086237,0.093291,0.084381,  
0.0764,0.043977,0.043798,0.044834,0.044342,0.043528,0.04237,0.2032,0.1  
7183,0.20823,0.19765,0.19112,0.25259,0.24937,0.14419,0.089105,0.078417  
,0.085222,0.084351,0.086794,0.091144,0.10219,0.082133,0.087351,0.08887  
8,0.082141,0.088293,0.084234,0.085622,0.081983,0.083266,0.085277,0.088  
422,0.082758,0.087052,0.090117,0.099524,0.091814,0.042268,0.044491,0.0

43138,0.041618,0.041071,0.044099,0.21448,0.14898,0.18439,0.21187,0.198  
9,0.043873,0.044872,0.085965,0.09174,0.085543,0.087966,0.085224,0.0845  
27,0.086802,0.086239,0.081162,0.085669,0.094698,0.086963,0.086291,0.09  
0928,0.087461,0.097121,0.072081,0.087284,0.086665,0.098092,0.084714,0.  
044677,0.043544,0.042839,0.043659,0.042823,0.042779,0.044667,0.044126,  
0.043337,0.043086,0.21526,0.20382,0.043855,0.045099,0.043085,0.044416,  
0.084464,0.089703,0.069042,0.094402,0.083443,0.08862,0.088625,0.085497  
,0.091901,0.09274,0.085958,0.084069,0.095053,0.086457,0.1003,0.079893,  
0.08176,0.085517,0.086268,0.045583,0.045729,0.044177,0.043311,0.041843  
,0.045341,0.042745,0.043498,0.044464,0.042583,0.044582,0.042976,0.0426  
2,0.04517,0.042346,0.043337,0.04247,0.084081,0.096314,0.09312,0.077658  
,0.093559,0.086882,0.085142,0.093835,0.081094,0.094082,0.08641,0.08690  
1,0.088489,0.095153,0.098319,0.088411,0.044922,0.044023,0.041703,0.045  
534,0.043804,0.045067,0.046229,0.042664,0.043412,0.044952,0.043006,0.0  
4494,0.044855,0.043721,0.043278,0.043588,0.042137,0.043516,0.043731,0.  
082797,0.087435,0.086362,0.083403,0.089297,0.087944,0.08663,0.084237,0.  
.086224,0.07957,0.081602,0.084109,0.084741,0.042038,0.042828,0.043251,  
0.042558,0.043552,0.044017,0.044957,0.044604,0.042819,0.045274,0.04288  
8,0.043469,0.04365,0.043249,0.044208,0.043161,0.043542,0.045065,0.0446  
04,0.04586,0.044743,0.084151,0.099071,0.091735,0.086291,0.083718,0.086  
973,0.088949,0.095201,0.08448,0.043881,0.043006,0.044744,0.04298,0.042  
278,0.044988,0.045103,0.043047,0.042786,0.044405,0.044372,0.043262,0.0  
41897,0.045159,0.04474,0.044194,0.04491,0.042615,0.042589,0.043098,0.0  
44711,0.04285,0.043896,0.042966,0.042855,0.080682,0.089386,0.081594,0.  
087551,0.042586,0.045934,0.046521,0.04453,0.043145,0.042034,0.04435,0.  
042964,0.045394,0.042693,0.044817,0.04207,0.044186,0.039862,0.043801,0.  
.044244,0.045055,0.042713,0.04427,0.041757,0.045126,0.0437,0.041562,0.  
042518,0.044727,0.042992,0.043971,0.043388,0.044069,0.045801,0.042359,  
0.04428,0.04314,0.043707,0.041379,0.043492,0.043598,0.045309,0.039444,  
0.042245,0.043261,0.044247,0.044627,0.042614,0.041399,0.041769,0.04568  
6,0.044095,0.045363,0.0444,0.042701,0.043723,0.042952,0.043138,0.04275  
,0.04536,0.045688,0.043138,0.046834,0.043767,0.044543,0.042836,0.04215  
1,0.042945,0.042432,0.043218,0.043995,0.043409,0.041418,0.044119,0.045  
995,0.043322,0.041866,0.043087,0.043829,0.044903,0.044464,0.044838,0.0  
45087,0.046157,0.043235,0.045032,0.045378,0.042283,0.045871,0.044345,0.  
.044247,0.043261,0.042897,0.042624,0.043334,0.044299,0.042535,0.044992  
,0.04381,0.044768,0.04286,0.043076,0.044424,0.043044,0.041796,0.043755  
,0.045657,0.04262,0.045716,0.044667,0.042626,0.044502,0.04281,0.045326  
,0.042563,0.045072,0.045176,0.042597,0.043779,0.043848,0.04344,0.04465  
3,0.044137,0.045003,0.044899,0.045756,0.044543,0.043108,0.046136,0.044  
934,0.044091,0.043801,0.041697,0.044813,0.04261,0.041899,0.042438,0.04  
5486,0.043761,0.044252,0.044943,0.044982,0.043829,0.043682,0.044205,0.  
046194,0.041861,0.043302,0.044223,0.043628,0.045042,0.043064,0.043254,  
0.042207,0.042317,0.043224,0.044188,0.043273,0.04438,0.043666,0.044976  
,0.041729,0.04465,0.041928,0.043485,0.043762,0.04202,0.043808,0.044467  
,0.042596,0.041848,0.047083,0.042129,0.044782,0.043128,0.043283,0.0439  
48,0.043842,0.044107,0.044045,0.04394,0.043141,0.044137,0.045034,0.044  
963,0.044456,0.043347,0.043313,0.044954,0.043589,0.042298,0.044256,0.0  
43402,0.04289,0.043182,0.042339,0.043978,0.041353,0.045615  
0.11924,0.11888,0.12206,0.12464,0.12397,0.12515,0.12181,0.12523,0.1243  
9,0.12478,0.12414,0.12305,0.12563,0.12503,0.12241,0.12311,0.12165,0.12  
41,0.12359,0.11751,0.2394,0.21279,0.26821,0.25804,0.1237,0.12509,0.120

9, 0.12266, 0.12228, 0.12462, 0.12189, 0.12269, 0.1254, 0.12128, 0.12249, 0.125  
1, 0.11989, 0.12281, 0.11869, 0.34377, 0.24276, 0.24153, 0.24926, 0.2555, 0.229  
79, 0.24998, 0.12131, 0.12202, 0.12299, 0.12073, 0.12107, 0.12254, 0.12215, 0.1  
2212, 0.12242, 0.11969, 0.12262, 0.12477, 0.12313, 0.12164, 0.12131, 0.36047, 0  
.38036, 0.22285, 0.24272, 0.23573, 0.24045, 0.23682, 0.24346, 0.24439, 0.24042  
, 0.121, 0.12183, 0.12274, 0.12215, 0.12296, 0.12528, 0.12404, 0.1196, 0.12234,  
0.12141, 0.11984, 0.12142, 0.12255, 0.12226, 0.12297, 0.34343, 0.38278, 0.3428  
9, 0.23673, 0.24007, 0.28593, 0.22237, 0.24354, 0.23793, 0.23562, 0.26238, 0.24  
996, 0.12118, 0.12168, 0.12537, 0.12495, 0.12157, 0.12206, 0.12334, 0.12227, 0.  
12226, 0.12232, 0.12139, 0.12336, 0.12274, 0.12613, 0.12119, 0.12413, 0.37263,  
0.36213, 0.35744, 0.3706, 0.25283, 0.24523, 0.24823, 0.2463, 0.25929, 0.24388,  
0.22673, 0.21662, 0.26838, 0.22542, 0.12321, 0.12199, 0.12298, 0.1218, 0.12303  
, 0.1234, 0.12315, 0.12339, 0.12287, 0.12484, 0.11978, 0.12535, 0.1237, 0.12116  
, 0.12013, 0.12413, 0.37702, 0.37927, 0.37878, 0.33541, 0.37357, 0.37856, 0.263  
31, 0.25629, 0.24911, 0.23661, 0.23031, 0.27158, 0.2599, 0.23129, 0.24043, 0.27  
947, 0.12326, 0.12019, 0.12285, 0.1197, 0.12198, 0.12019, 0.11876, 0.12173, 0.1  
2395, 0.11905, 0.12273, 0.12432, 0.12174, 0.12087, 0.12332, 0.12661, 0.12326, 0  
.39245, 0.34162, 0.37772, 0.36929, 0.35531, 0.34363, 0.26704, 0.23078, 0.23248  
, 0.25686, 0.23378, 0.24896, 0.26279, 0.2304, 0.22367, 0.26174, 0.22529, 0.1218  
5, 0.12343, 0.12083, 0.12364, 0.12262, 0.12033, 0.12028, 0.12234, 0.12384, 0.12  
263, 0.12504, 0.12467, 0.12038, 0.078411, 0.085356, 0.087129, 0.12141, 0.37585  
, 0.36809, 0.35975, 0.39452, 0.39802, 0.37996, 0.37541, 0.22274, 0.30322, 0.243  
19, 0.27645, 0.25523, 0.25914, 0.23928, 0.2506, 0.23908, 0.25414, 0.25204, 0.12  
308, 0.12389, 0.11915, 0.12412, 0.12368, 0.12254, 0.12684, 0.1246, 0.11991, 0.1  
2094, 0.12298, 0.080218, 0.091167, 0.083539, 0.079171, 0.0826, 0.082312, 0.125  
26, 0.39357, 0.37176, 0.3645, 0.36882, 0.3872, 0.39031, 0.3813, 0.24662, 0.2705  
8, 0.23769, 0.232, 0.24044, 0.27444, 0.23365, 0.23096, 0.23797, 0.25811, 0.2490  
4, 0.12059, 0.12514, 0.12519, 0.12458, 0.12153, 0.12226, 0.12282, 0.11814, 0.12  
028, 0.081016, 0.085674, 0.077328, 0.079397, 0.081965, 0.08098, 0.085327, 0.08  
1397, 0.077522, 0.12269, 0.37176, 0.37435, 0.37446, 0.40995, 0.40022, 0.34043,  
0.37053, 0.2538, 0.2402, 0.2433, 0.26362, 0.22838, 0.2616, 0.2313, 0.25425, 0.2  
3842, 0.22681, 0.24996, 0.23468, 0.12561, 0.12247, 0.12228, 0.1224, 0.12275, 0.  
12199, 0.082633, 0.084439, 0.088723, 0.077517, 0.082993, 0.084611, 0.075972, 0  
.071472, 0.077739, 0.083966, 0.078196, 0.084684, 0.38298, 0.35049, 0.37281, 0.  
3681, 0.36212, 0.36542, 0.35707, 0.22958, 0.26023, 0.25302, 0.24685, 0.24723, 0  
.25412, 0.28231, 0.25647, 0.25269, 0.25493, 0.26103, 0.28391, 0.12516, 0.11889  
, 0.12187, 0.082804, 0.067357, 0.082628, 0.074411, 0.082073, 0.086195, 0.08366  
6, 0.081866, 0.0813, 0.073997, 0.081579, 0.086439, 0.080813, 0.082488, 0.08358  
6, 0.36581, 0.34911, 0.37284, 0.35296, 0.39422, 0.35151, 0.38015, 0.36168, 0.38  
687, 0.24009, 0.27575, 0.26332, 0.26938, 0.24575, 0.25371, 0.27361, 0.24451, 0.  
2827, 0.2466, 0.25028, 0.08356, 0.078378, 0.08107, 0.082306, 0.089751, 0.08214  
7, 0.077663, 0.081473, 0.082368, 0.083062, 0.084622, 0.091714, 0.080638, 0.085  
969, 0.079611, 0.082235, 0.077072, 0.084373, 0.3499, 0.37155, 0.35676, 0.34831  
, 0.35673, 0.38219, 0.36471, 0.37399, 0.34267, 0.22105, 0.25729, 0.16902, 0.185  
19, 0.17142, 0.20614, 0.17025, 0.17884, 0.17938, 0.17892, 0.18667, 0.082727, 0.  
08355, 0.089126, 0.08255, 0.081893, 0.083338, 0.082898, 0.082908, 0.082635, 0.  
081435, 0.082486, 0.08013, 0.086613, 0.076479, 0.084005, 0.083338, 0.083238, 0  
.082637, 0.34967, 0.34352, 0.35714, 0.39585, 0.35838, 0.40376, 0.38395, 0.3800  
1, 0.36447, 0.19329, 0.18062, 0.15208, 0.18888, 0.16955, 0.17733, 0.18638, 0.16  
684, 0.13477, 0.16368, 0.16921, 0.082192, 0.086178, 0.084891, 0.081702, 0.0767  
71, 0.083226, 0.089327, 0.081513, 0.085217, 0.085768, 0.063542, 0.082119, 0.08  
2966, 0.082113, 0.08514, 0.085685, 0.0806, 0.08144, 0.40485, 0.38424, 0.37659,

0.36341,0.34437,0.38017,0.37239,0.21574,0.23897,0.21341,0.1657,0.20631  
,0.17634,0.16572,0.16416,0.1821,0.18351,0.18992,0.18101,0.18215,0.0815  
05,0.083089,0.090225,0.085366,0.08475,0.088103,0.081948,0.078554,0.080  
337,0.083312,0.082057,0.083925,0.083107,0.09651,0.079793,0.08383,0.086  
664,0.095693,0.35642,0.36456,0.373,0.39784,0.36942,0.39522,0.19645,0.2  
7691,0.17378,0.21772,0.17843,0.18086,0.16711,0.18914,0.13452,0.18072,0  
.18772,0.16966,0.18401,0.17695,0.075912,0.080719,0.089943,0.07937,0.08  
4744,0.087183,0.079734,0.083228,0.077249,0.10162,0.084591,0.088872,0.0  
81771,0.079364,0.0747,0.077408,0.080315,0.084578,0.38195,0.36996,0.364  
27,0.36466,0.38105,0.21146,0.21866,0.24605,0.20505,0.19568,0.20374,0.1  
8652,0.17518,0.18976,0.18222,0.17783,0.20494,0.17751,0.16382,0.14505,0  
.083222,0.086996,0.092502,0.078966,0.085912,0.084224,0.081708,0.081536  
,0.085289,0.081792,0.084335,0.083829,0.084125,0.078519,0.084383,0.0834  
72,0.082409,0.097395,0.33829,0.35339,0.37104,0.18367,0.20583,0.23806,0  
.16878,0.1891,0.22451,0.18542,0.1836,0.18061,0.17987,0.14871,0.17513,0  
.16186,0.17192,0.18369,0.19342,0.17967,0.091752,0.082732,0.079505,0.08  
2116,0.083627,0.081934,0.081225,0.077343,0.082455,0.084127,0.082706,0.  
074556,0.083577,0.083202,0.083197,0.081071,0.085618,0.085547,0.38479,0  
.21911,0.19414,0.21286,0.22361,0.21505,0.20418,0.18829,0.21222,0.2384,  
0.1698,0.16423,0.18585,0.16573,0.19119,0.17968,0.19522,0.18104,0.16499  
,0.082362,0.082041,0.077518,0.075319,0.082636,0.082004,0.081446,0.0929  
15,0.086642,0.082745,0.077618,0.08318,0.086113,0.085933,0.084007,0.081  
183,0.080844,0.041467,0.20559,0.16575,0.20586,0.21471,0.20403,0.20616,  
0.20019,0.2046,0.14414,0.23684,0.18397,0.18538,0.18048,0.18234,0.13803  
,0.18556,0.17108,0.17442,0.198,0.08023,0.069611,0.077638,0.081528,0.09  
8784,0.06345,0.087591,0.081442,0.08281,0.08741,0.08262,0.08541,0.07968  
9,0.083447,0.088886,0.080667,0.081028,0.042554,0.22899,0.20847,0.20324  
,0.19576,0.2744,0.22352,0.21694,0.19796,0.15313,0.22658,0.19243,0.1672  
3,0.17641,0.16529,0.18256,0.19199,0.17974,0.18142,0.081531,0.082286,0.  
07992,0.08965,0.087847,0.07962,0.082905,0.081599,0.071781,0.088115,0.0  
84484,0.082156,0.082026,0.080605,0.080993,0.081905,0.083446,0.082599,0  
.041836,0.22944,0.15645,0.24183,0.20924,0.20493,0.21488,0.188,0.18784,  
0.18843,0.21165,0.16946,0.18345,0.19339,0.14851,0.1821,0.15584,0.17147  
,0.18253,0.081848,0.081686,0.08481,0.08248,0.078986,0.0798,0.079022,0.  
080573,0.08792,0.08508,0.084638,0.084895,0.075487,0.080017,0.083507,0.  
082077,0.086849,0.041562,0.042044,0.04215,0.23647,0.17865,0.20384,0.20  
428,0.17445,0.20314,0.21071,0.17836,0.23976,0.19675,0.1632,0.16539,0.1  
6253,0.18249,0.17574,0.083078,0.090803,0.082734,0.08368,0.081702,0.078  
03,0.084561,0.076167,0.081673,0.077107,0.085086,0.083379,0.090843,0.08  
6669,0.088364,0.084725,0.078722,0.08229,0.042049,0.044123,0.043957,0.0  
40766,0.19781,0.20111,0.20909,0.19869,0.22616,0.21955,0.19647,0.20185,  
0.18786,0.18543,0.19065,0.18857,0.08672,0.080828,0.10347,0.094275,0.08  
6054,0.080553,0.082571,0.080788,0.086295,0.083485,0.080913,0.084844,0.  
080211,0.083339,0.078579,0.08388,0.082881,0.089251,0.080266,0.073281,0  
.04315,0.043207,0.043628,0.043203,0.042396,0.04122,0.20024,0.17083,0.2  
0645,0.1978,0.19344,0.24295,0.24425,0.14333,0.084545,0.074868,0.08127,  
0.080492,0.083815,0.0863,0.098173,0.078714,0.083654,0.085731,0.079308,  
0.083687,0.078916,0.081195,0.078757,0.07924,0.08108,0.083674,0.078995,  
0.08271,0.085654,0.094827,0.087452,0.042113,0.041783,0.041634,0.040267  
,0.039898,0.043205,0.21088,0.14839,0.18722,0.21092,0.19406,0.042199,0.  
043427,0.082821,0.087082,0.081104,0.083209,0.081079,0.081473,0.08319,0  
.08185,0.078136,0.082636,0.089251,0.083335,0.082172,0.08702,0.083132,0

.093951,0.069122,0.083415,0.082013,0.094852,0.081542,0.043696,0.041778  
,0.041975,0.042876,0.041636,0.041182,0.042817,0.043595,0.041552,0.0421  
22,0.21305,0.20196,0.042955,0.043872,0.042459,0.043058,0.080799,0.0860  
9,0.066064,0.090662,0.07936,0.085232,0.084026,0.08253,0.088031,0.08838  
8,0.081412,0.080206,0.091194,0.083502,0.094912,0.076513,0.078253,0.083  
754,0.082071,0.043828,0.043867,0.042548,0.041252,0.040585,0.043783,0.0  
41538,0.042307,0.043819,0.040819,0.04342,0.041178,0.042051,0.044512,0.  
041303,0.041644,0.040946,0.081685,0.092215,0.08941,0.074712,0.089458,0  
.082649,0.081005,0.090559,0.07824,0.089957,0.082014,0.082933,0.084368,  
0.091114,0.093595,0.083705,0.043918,0.043153,0.040502,0.043451,0.04240  
1,0.043726,0.045932,0.042693,0.042061,0.042983,0.042325,0.044209,0.042  
984,0.042009,0.042518,0.042596,0.041772,0.043316,0.042314,0.07944,0.08  
3904,0.08313,0.079678,0.084921,0.084864,0.08253,0.080921,0.082368,0.07  
6413,0.07791,0.079844,0.080682,0.040843,0.042094,0.042924,0.041932,0.0  
4252,0.042271,0.042828,0.043241,0.040526,0.043726,0.04156,0.0424,0.042  
29,0.042223,0.042393,0.041807,0.042538,0.043403,0.042676,0.045059,0.04  
3731,0.08017,0.095432,0.087832,0.081772,0.080833,0.083605,0.085507,0.0  
91258,0.080023,0.042725,0.041925,0.043392,0.04234,0.040939,0.044486,0.  
043519,0.041971,0.04171,0.043043,0.042478,0.042622,0.040027,0.043343,0  
.043132,0.043373,0.043411,0.042425,0.040872,0.041639,0.043857,0.040865  
,0.043194,0.042402,0.042326,0.076732,0.083947,0.077769,0.082681,0.0413  
62,0.044191,0.044193,0.044138,0.042015,0.040708,0.04245,0.041889,0.043  
498,0.040674,0.043665,0.040347,0.043026,0.038755,0.043928,0.043823,0.0  
43459,0.04099,0.043468,0.040355,0.043868,0.042052,0.041147,0.04228,0.0  
43643,0.041297,0.042773,0.042487,0.042949,0.044316,0.040288,0.042828,0  
.041375,0.043081,0.040703,0.042581,0.042546,0.043635,0.038357,0.040836  
,0.041965,0.043024,0.042709,0.040993,0.040813,0.040893,0.043386,0.0425  
12,0.043909,0.043384,0.041257,0.043002,0.041658,0.042392,0.04175,0.043  
82,0.044148,0.042733,0.045246,0.043009,0.044334,0.042431,0.040557,0.04  
1526,0.041038,0.042304,0.042961,0.041816,0.039827,0.042033,0.044759,0.  
042379,0.041265,0.042067,0.042006,0.043032,0.042549,0.042846,0.04461,0  
.044645,0.042437,0.043253,0.043577,0.041307,0.044104,0.042848,0.042601  
,0.042057,0.040826,0.040728,0.041876,0.042203,0.041723,0.043159,0.0424  
07,0.041691,0.041539,0.041361,0.042905,0.04175,0.041442,0.042147,0.043  
96,0.040887,0.042985,0.043456,0.040837,0.043644,0.041852,0.043555,0.04  
1827,0.043888,0.04409,0.041439,0.042435,0.041754,0.041369,0.043653,0.0  
41442,0.044491,0.042928,0.043791,0.04316,0.042541,0.044401,0.043607,0.  
04242,0.04202,0.041246,0.042622,0.041187,0.041471,0.041458,0.044715,0.  
042706,0.042996,0.043217,0.043907,0.042809,0.042588,0.042877,0.045826,  
0.04161,0.042085,0.042435,0.041714,0.043022,0.042521,0.042024,0.041301  
,0.040257,0.041579,0.04189,0.042333,0.042549,0.043075,0.044225,0.04027  
3,0.043005,0.040732,0.043216,0.042623,0.041031,0.042948,0.042628,0.042  
533,0.041211,0.045361,0.041504,0.043826,0.042765,0.041461,0.041608,0.0  
4203,0.041693,0.043314,0.043074,0.042421,0.043099,0.043401,0.042561,0.  
042903,0.042479,0.041534,0.043414,0.04227,0.041483,0.043664,0.042136,0  
.04236,0.042134,0.04224,0.042653,0.040404,0.044419  
0.11375,0.11441,0.11763,0.11867,0.11827,0.11979,0.11745,0.12048,0.1188  
8,0.1183,0.12028,0.11834,0.12027,0.11966,0.11756,0.11833,0.11643,0.119  
41,0.11824,0.11239,0.23904,0.20039,0.26598,0.25779,0.11898,0.12074,0.1  
1487,0.11671,0.11906,0.11877,0.11759,0.11794,0.11878,0.11719,0.11695,0  
.11901,0.11467,0.11672,0.11389,0.33527,0.22698,0.23316,0.24492,0.25334  
,0.23333,0.24592,0.11804,0.11635,0.11822,0.11548,0.11506,0.11812,0.116



93,0.11645,0.11771,0.11313,0.11728,0.12033,0.11817,0.11769,0.11556,0.3  
6958,0.37915,0.21841,0.23732,0.23308,0.23768,0.22558,0.23592,0.24118,0  
.23221,0.11528,0.11617,0.1198,0.11713,0.11699,0.12014,0.11756,0.11428,  
0.11675,0.11594,0.11577,0.11677,0.11782,0.11721,0.1175,0.33705,0.36808  
,0.34226,0.22351,0.24412,0.27707,0.22163,0.23897,0.22996,0.23948,0.250  
89,0.24616,0.11565,0.11718,0.1178,0.11924,0.1171,0.11648,0.11733,0.117  
27,0.11564,0.11841,0.11759,0.12026,0.11786,0.12095,0.11635,0.11914,0.3  
6616,0.36842,0.33397,0.36891,0.25127,0.24504,0.24226,0.24288,0.25271,0  
.23815,0.22054,0.20594,0.25583,0.22473,0.11839,0.11575,0.11786,0.11734  
,0.11871,0.1167,0.11852,0.11861,0.11724,0.11928,0.11474,0.12024,0.1171  
,0.11676,0.11491,0.11995,0.37459,0.37901,0.35621,0.34086,0.36359,0.373  
77,0.26477,0.2459,0.24164,0.23496,0.22877,0.26813,0.25145,0.22113,0.23  
758,0.27122,0.11817,0.11701,0.11778,0.11526,0.11684,0.11514,0.11463,0.  
11654,0.11918,0.11449,0.11754,0.12004,0.1166,0.11595,0.11819,0.12033,0  
.11811,0.3864,0.34076,0.38145,0.37175,0.34694,0.34707,0.26258,0.2307,0  
.23253,0.25025,0.23067,0.24583,0.25325,0.23061,0.22085,0.25793,0.21958  
,0.11817,0.11703,0.11547,0.11637,0.11804,0.1138,0.1152,0.11815,0.11792  
,0.11894,0.11926,0.11891,0.11485,0.075929,0.082167,0.083516,0.11609,0.  
38275,0.36399,0.37307,0.39202,0.38851,0.36677,0.38169,0.2215,0.29841,0  
.23406,0.28436,0.25177,0.2524,0.2355,0.25469,0.23204,0.24718,0.24829,0  
.1179,0.11829,0.11442,0.1186,0.11864,0.11691,0.12106,0.11851,0.11534,0  
.11665,0.11833,0.07757,0.086957,0.081351,0.076933,0.078953,0.078793,0.  
11925,0.38511,0.36748,0.35583,0.36304,0.38162,0.38144,0.37571,0.2335,0  
.26334,0.23242,0.2232,0.22894,0.27586,0.22843,0.22547,0.23421,0.25101,  
0.24581,0.11568,0.11931,0.11935,0.12019,0.11648,0.11805,0.11704,0.1131  
7,0.11523,0.078076,0.083092,0.074339,0.076453,0.078524,0.077842,0.0832  
97,0.079578,0.074371,0.11709,0.3755,0.36559,0.37397,0.40582,0.39926,0.  
35059,0.3578,0.25274,0.23617,0.24365,0.26972,0.22637,0.25498,0.22355,0  
.24891,0.23432,0.22576,0.24817,0.23074,0.11998,0.11637,0.11745,0.11825  
,0.11694,0.11635,0.079384,0.080535,0.08478,0.074911,0.079035,0.080971,  
0.072109,0.069293,0.074168,0.080914,0.075407,0.080827,0.37591,0.35329,  
0.3775,0.36607,0.34779,0.36715,0.34511,0.22733,0.25506,0.24891,0.24181  
,0.23618,0.25473,0.27602,0.24921,0.23832,0.25396,0.25044,0.27661,0.120  
52,0.11388,0.11765,0.07837,0.065668,0.079301,0.071375,0.079608,0.08285  
6,0.081409,0.077868,0.078196,0.071278,0.078379,0.083116,0.077212,0.079  
105,0.079803,0.37031,0.34051,0.37326,0.34019,0.39994,0.34767,0.3759,0.  
37417,0.38383,0.23815,0.26587,0.24902,0.26322,0.23787,0.24609,0.26772,  
0.23661,0.2819,0.23348,0.24475,0.079999,0.076739,0.079312,0.078628,0.0  
86553,0.079965,0.075284,0.079172,0.079459,0.080031,0.080912,0.087338,0  
.078053,0.082844,0.07674,0.078993,0.073939,0.081405,0.35001,0.37461,0.  
36047,0.35183,0.34574,0.37836,0.36317,0.38557,0.35057,0.21915,0.24701,  
0.16827,0.17621,0.16957,0.20173,0.16392,0.17269,0.17292,0.17706,0.1790  
3,0.078594,0.080773,0.08611,0.079801,0.078652,0.078846,0.080349,0.0787  
12,0.079387,0.077198,0.079868,0.077882,0.083195,0.072747,0.080828,0.08  
0288,0.080604,0.079654,0.3498,0.33237,0.33933,0.39399,0.37062,0.39235,  
0.37375,0.38126,0.35939,0.19253,0.17564,0.14942,0.1816,0.16581,0.17318  
,0.19009,0.16552,0.13239,0.16209,0.16421,0.079707,0.0827,0.081155,0.07  
7372,0.075257,0.080875,0.085835,0.078993,0.082349,0.08225,0.061011,0.0  
80059,0.079717,0.079084,0.081915,0.082697,0.078293,0.078419,0.38394,0.  
35765,0.37541,0.35245,0.34422,0.38297,0.36719,0.21113,0.2301,0.20498,0  
.16131,0.20269,0.1728,0.16118,0.16185,0.18086,0.18156,0.18776,0.17512,  
0.17769,0.078217,0.079709,0.086127,0.082459,0.081263,0.084311,0.080208

,0.074476,0.077487,0.08061,0.078494,0.081042,0.079052,0.092722,0.07720  
8,0.080913,0.08368,0.092187,0.3539,0.36954,0.35892,0.38609,0.36121,0.3  
8946,0.1971,0.27697,0.17486,0.22579,0.17493,0.17449,0.16653,0.17833,0.  
1291,0.17552,0.18291,0.16701,0.17895,0.17169,0.074625,0.078018,0.08704  
6,0.075995,0.082098,0.08354,0.076866,0.080142,0.073855,0.097872,0.0827  
67,0.085117,0.078801,0.076573,0.072155,0.074834,0.077047,0.08141,0.363  
45,0.35731,0.36265,0.35908,0.37151,0.2131,0.21083,0.24223,0.19924,0.19  
292,0.19186,0.18093,0.17378,0.1902,0.17655,0.17554,0.19981,0.17214,0.1  
5942,0.13814,0.080085,0.083614,0.087973,0.075648,0.083929,0.08057,0.07  
8335,0.078198,0.081841,0.07923,0.082042,0.081338,0.081263,0.074954,0.0  
81726,0.080166,0.078697,0.094353,0.32996,0.35278,0.35754,0.1786,0.1991  
5,0.22631,0.17175,0.18824,0.21295,0.1842,0.18087,0.18094,0.17625,0.146  
57,0.17164,0.16219,0.16551,0.17762,0.19536,0.17406,0.088439,0.080108,0  
.076663,0.079149,0.081491,0.078177,0.078307,0.074531,0.079789,0.081743  
,0.079818,0.071767,0.080877,0.0794,0.07891,0.078049,0.083458,0.082532,  
0.3944,0.21699,0.19712,0.20647,0.22651,0.20823,0.19965,0.19004,0.21369  
,0.23931,0.16644,0.16237,0.18066,0.16414,0.18801,0.17819,0.18735,0.178  
15,0.16179,0.078834,0.07786,0.074386,0.073778,0.079209,0.079834,0.0783  
99,0.0886,0.083827,0.078882,0.074426,0.079267,0.083024,0.081514,0.0805  
98,0.078227,0.077711,0.040588,0.20446,0.16567,0.20643,0.20561,0.19952,  
0.19572,0.19536,0.20797,0.14196,0.23776,0.18176,0.18689,0.18076,0.1780  
7,0.13534,0.18162,0.16665,0.17731,0.19304,0.077371,0.068428,0.075745,0  
.078209,0.094631,0.061322,0.083608,0.079414,0.07951,0.08366,0.079077,0  
.08212,0.076127,0.081347,0.085299,0.078464,0.078023,0.042197,0.22566,0  
.2102,0.20139,0.20037,0.27452,0.22162,0.21759,0.19675,0.15898,0.22336,  
0.19072,0.1624,0.17488,0.16558,0.17967,0.19139,0.17583,0.17345,0.07775  
9,0.079289,0.076366,0.086682,0.08489,0.077091,0.079216,0.078805,0.0686  
71,0.085089,0.081235,0.079043,0.079286,0.078133,0.078815,0.079202,0.08  
2232,0.080443,0.041212,0.21861,0.15666,0.23554,0.20776,0.20561,0.21193  
,0.187,0.18479,0.1811,0.21195,0.16682,0.17997,0.19252,0.14571,0.17526,  
0.14988,0.1673,0.18295,0.078918,0.079192,0.081921,0.0793,0.077759,0.07  
6719,0.07656,0.077324,0.085,0.081773,0.081956,0.081179,0.072092,0.0774  
36,0.080017,0.079476,0.083653,0.041128,0.040934,0.041019,0.24173,0.175  
78,0.19627,0.20709,0.17121,0.20175,0.20698,0.18129,0.23538,0.18668,0.1  
5725,0.15973,0.15591,0.1831,0.17126,0.079649,0.087571,0.078449,0.08156  
6,0.079566,0.074709,0.080495,0.074061,0.077581,0.075346,0.081992,0.080  
707,0.088068,0.083497,0.084798,0.081969,0.075519,0.080131,0.041753,0.0  
42999,0.042868,0.039963,0.19584,0.20813,0.20838,0.1998,0.23093,0.2186,  
0.19253,0.19612,0.18464,0.18237,0.18532,0.18598,0.082432,0.078577,0.10  
03,0.091465,0.082674,0.077485,0.079446,0.077665,0.081987,0.080327,0.07  
8461,0.082198,0.077875,0.080099,0.075181,0.081167,0.079738,0.085716,0.  
077736,0.07107,0.041126,0.042546,0.042912,0.043229,0.041407,0.040803,0  
.19895,0.16656,0.206,0.20366,0.19355,0.24282,0.23518,0.14389,0.080889,  
0.072578,0.0783,0.078715,0.080425,0.082563,0.095034,0.075638,0.081353,  
0.082791,0.076748,0.080186,0.075911,0.07799,0.075671,0.078133,0.077767  
,0.080501,0.077024,0.078811,0.081782,0.091545,0.082639,0.040831,0.0418  
84,0.041013,0.039506,0.039141,0.041825,0.21184,0.14754,0.18758,0.20755  
,0.18014,0.041064,0.043371,0.078351,0.08532,0.078168,0.081507,0.077911  
,0.079418,0.080068,0.078699,0.074895,0.080178,0.084379,0.079801,0.0804  
91,0.083879,0.080806,0.089955,0.066771,0.080164,0.078734,0.090867,0.07  
8334,0.042232,0.040715,0.041449,0.041471,0.041054,0.040945,0.041711,0.  
042655,0.040719,0.041263,0.21067,0.20312,0.042394,0.04244,0.041534,0.0

41035,0.078876,0.083427,0.063579,0.087317,0.077118,0.081125,0.080798,0.  
.078351,0.083665,0.085217,0.078463,0.076723,0.08678,0.07988,0.091231,0.  
.073515,0.075568,0.080898,0.079766,0.042296,0.042739,0.041181,0.039374  
,0.039407,0.042484,0.040527,0.040666,0.042316,0.040312,0.042732,0.0400  
95,0.040289,0.043121,0.040153,0.040902,0.039238,0.07804,0.089054,0.085  
514,0.072438,0.085708,0.07933,0.079166,0.086835,0.075085,0.087283,0.07  
8568,0.078988,0.080626,0.088557,0.089224,0.081109,0.043142,0.042583,0.  
0391,0.04187,0.042227,0.041957,0.044619,0.041794,0.040684,0.042287,0.0  
40979,0.043276,0.041644,0.041428,0.040903,0.040836,0.040858,0.041591,0  
.0416,0.075825,0.079681,0.078704,0.076456,0.082549,0.08222,0.079507,0.  
077653,0.079446,0.073726,0.075365,0.077079,0.077996,0.039671,0.041481,  
0.042235,0.041048,0.0412,0.042096,0.042071,0.042312,0.039894,0.041586,  
0.040894,0.041584,0.041689,0.0411,0.041019,0.040326,0.041517,0.0419,0.  
042774,0.043858,0.043269,0.078353,0.091813,0.084272,0.077644,0.077599,  
0.080555,0.082579,0.089571,0.077298,0.042718,0.040911,0.043069,0.04111  
6,0.03972,0.043794,0.042554,0.04156,0.040945,0.042384,0.041414,0.04197  
4,0.038953,0.043324,0.042175,0.041472,0.042376,0.042013,0.040229,0.041  
622,0.042354,0.040391,0.040991,0.040907,0.041827,0.073754,0.081716,0.0  
75442,0.080102,0.039903,0.043244,0.042668,0.042754,0.041537,0.039032,0  
.042087,0.040084,0.042728,0.039546,0.042393,0.039649,0.042538,0.039345  
,0.043443,0.043302,0.042806,0.040122,0.041294,0.039075,0.043061,0.0409  
36,0.040299,0.040728,0.042752,0.041143,0.041345,0.041377,0.042122,0.04  
3148,0.039561,0.043017,0.040562,0.042245,0.040161,0.04288,0.041928,0.0  
41201,0.038079,0.040418,0.040187,0.042994,0.042171,0.040596,0.040756,0  
.039616,0.042741,0.041633,0.042957,0.041833,0.040538,0.042259,0.040938  
,0.041083,0.041284,0.04238,0.042397,0.041176,0.04412,0.042418,0.043542  
,0.04208,0.039879,0.041145,0.039267,0.041231,0.042818,0.040112,0.03881  
5,0.040223,0.043766,0.041634,0.041755,0.041178,0.041331,0.042265,0.041  
37,0.042581,0.04415,0.043458,0.041469,0.041948,0.044351,0.040388,0.043  
024,0.041321,0.043125,0.041117,0.03937,0.039545,0.040937,0.042427,0.04  
0931,0.041995,0.041557,0.040969,0.041079,0.040048,0.04186,0.041494,0.0  
40645,0.040512,0.043427,0.040092,0.042504,0.042162,0.040127,0.043432,0  
.040633,0.042292,0.040786,0.042766,0.043789,0.041311,0.04165,0.041305,  
0.040499,0.042867,0.040953,0.042894,0.041638,0.042623,0.042519,0.04264  
8,0.042605,0.042135,0.041629,0.040404,0.040685,0.042022,0.040021,0.040  
324,0.039506,0.044165,0.041986,0.042635,0.042463,0.042841,0.042054,0.0  
42222,0.041681,0.044244,0.04017,0.040811,0.041902,0.040297,0.04152,0.0  
41017,0.041448,0.041857,0.039927,0.041841,0.040921,0.040335,0.040788,0  
.042296,0.043758,0.039849,0.041827,0.039994,0.042164,0.042037,0.040133  
,0.041808,0.04163,0.040894,0.041068,0.043821,0.039825,0.043435,0.04258  
3,0.040835,0.040478,0.041386,0.041743,0.043418,0.041677,0.041265,0.041  
704,0.042308,0.04223,0.041628,0.042249,0.040693,0.043469,0.040886,0.04  
1539,0.043305,0.041584,0.041014,0.041581,0.041771,0.042642,0.040063,0.  
043144  
0.10895,0.11097,0.11356,0.11309,0.11369,0.11451,0.11178,0.11616,0.1147  
5,0.11375,0.11451,0.11325,0.11507,0.11439,0.11321,0.11465,0.11104,0.11  
503,0.11323,0.10936,0.23467,0.20108,0.25331,0.2583,0.11434,0.1153,0.11  
155,0.11142,0.11409,0.11585,0.11402,0.1146,0.11399,0.1136,0.11213,0.11  
454,0.10977,0.11362,0.11004,0.33123,0.22358,0.23422,0.23854,0.25189,0.  
23179,0.24524,0.11362,0.11219,0.11569,0.11161,0.11164,0.11314,0.11275,  
0.11187,0.11278,0.10912,0.11331,0.11613,0.11369,0.11329,0.11192,0.3727  
7,0.36111,0.21963,0.23283,0.22974,0.23279,0.22312,0.23026,0.2361,0.224

15,0.11279,0.11182,0.11446,0.11286,0.11271,0.11518,0.11217,0.10901,0.11195,0.1135,0.11343,0.11262,0.11383,0.11254,0.11321,0.33276,0.3673,0.33975,0.2188,0.23993,0.27098,0.22438,0.22881,0.22188,0.23363,0.24223,0.23631,0.11268,0.1128,0.11382,0.11531,0.11198,0.11267,0.11204,0.11355,0.11203,0.11359,0.11321,0.11483,0.11334,0.11739,0.1121,0.11579,0.37023,0.37221,0.32797,0.36204,0.25046,0.24007,0.23341,0.24236,0.24718,0.23042,0.21841,0.20865,0.25528,0.21433,0.11523,0.11209,0.11242,0.11291,0.11446,0.11259,0.11312,0.11326,0.11317,0.11536,0.1112,0.11565,0.1129,0.11429,0.11088,0.11557,0.36256,0.38002,0.35976,0.33734,0.35607,0.36152,0.25699,0.24498,0.24263,0.23536,0.22391,0.26276,0.24605,0.21844,0.22932,0.27041,0.11405,0.11398,0.11411,0.11153,0.11219,0.11147,0.11048,0.11235,0.11459,0.11077,0.11328,0.11513,0.11248,0.11188,0.11208,0.11636,0.11327,0.37969,0.35751,0.37852,0.34789,0.34167,0.3507,0.25866,0.22742,0.23754,0.25225,0.2225,0.24657,0.23867,0.23476,0.21687,0.25588,0.21745,0.11506,0.11317,0.11074,0.11272,0.11256,0.10959,0.11113,0.1139,0.1151,0.11566,0.11616,0.11447,0.1115,0.073465,0.079112,0.080637,0.11088,0.36549,0.37425,0.36536,0.39304,0.38199,0.36255,0.37872,0.21272,0.29347,0.23063,0.27386,0.25144,0.26012,0.23149,0.25282,0.2291,0.24613,0.24382,0.11517,0.11458,0.11017,0.11514,0.11457,0.11366,0.11647,0.11463,0.11184,0.1119,0.11403,0.075755,0.083609,0.078338,0.075508,0.076302,0.0769,0.11554,0.39061,0.38005,0.33249,0.36388,0.38073,0.36326,0.38856,0.23215,0.25349,0.23288,0.22084,0.23026,0.27474,0.22456,0.22087,0.23291,0.2393,0.24035,0.11137,0.11408,0.11467,0.11549,0.11133,0.11309,0.11398,0.10965,0.11107,0.07521,0.079377,0.072727,0.073382,0.075335,0.07585,0.08054,0.077631,0.071665,0.11167,0.37564,0.37813,0.37701,0.40157,0.39835,0.34558,0.34281,0.25051,0.23021,0.24851,0.27289,0.22545,0.25456,0.22192,0.24443,0.22942,0.22524,0.24102,0.22761,0.11489,0.11187,0.11305,0.1137,0.11237,0.11246,0.0771,0.078112,0.081243,0.072139,0.076458,0.078015,0.070446,0.068457,0.071742,0.079548,0.073961,0.078576,0.35665,0.35573,0.37801,0.37063,0.33785,0.37679,0.34586,0.23418,0.2504,0.24961,0.24083,0.22927,0.25467,0.26705,0.23989,0.23832,0.25488,0.25005,0.27064,0.11479,0.10994,0.11417,0.07682,0.063775,0.077512,0.069699,0.077659,0.080321,0.079429,0.074825,0.076287,0.068309,0.07535,0.081345,0.075681,0.076862,0.077574,0.37389,0.34591,0.36986,0.34863,0.39296,0.3553,0.36807,0.37509,0.3759,0.23815,0.25487,0.24445,0.25768,0.23874,0.24346,0.26669,0.22895,0.27114,0.2378,0.24344,0.077912,0.074954,0.076409,0.077119,0.083853,0.078081,0.07244,0.077297,0.07807,0.077637,0.077583,0.083864,0.075493,0.080914,0.074541,0.076979,0.071807,0.079252,0.35337,0.38756,0.35752,0.35359,0.33958,0.38468,0.36079,0.3841,0.34197,0.21629,0.24437,0.16018,0.1717,0.16542,0.20047,0.16182,0.17158,0.16529,0.17797,0.18255,0.07628,0.077204,0.082581,0.076677,0.075394,0.07595,0.078602,0.075917,0.077666,0.075901,0.077057,0.075631,0.080525,0.071144,0.078421,0.078512,0.078091,0.077786,0.35716,0.33324,0.34805,0.3787,0.37652,0.3898,0.38922,0.38469,0.35533,0.1952,0.17132,0.14732,0.17821,0.16533,0.17305,0.18254,0.15856,0.13006,0.15847,0.16354,0.077267,0.07945,0.079502,0.075611,0.073465,0.078597,0.083309,0.077045,0.081263,0.079363,0.058879,0.078232,0.07668,0.077071,0.078443,0.079047,0.074169,0.075547,0.37376,0.35866,0.3922,0.35271,0.33094,0.36696,0.3758,0.21003,0.22813,0.20399,0.15772,0.19843,0.16615,0.15948,0.15726,0.17746,0.1804,0.1827,0.17322,0.17597,0.076273,0.077412,0.082541,0.080192,0.078719,0.08138,0.077666,0.072709,0.075629,0.078064,0.075727,0.078118,0.076174,0.08978,0.074439,0.078319,0.080879,0.089283,0.35266,0.37527,0.36099,0.3808,0.35826,0.37233,0.19361

,0.27417,0.1754,0.22812,0.16906,0.17654,0.16862,0.16742,0.12389,0.17183,0.18088,0.16549,0.17506,0.16818,0.072925,0.076093,0.084008,0.073559,0.078845,0.08157,0.07448,0.077157,0.071501,0.093898,0.080215,0.082304,0.076947,0.075267,0.070336,0.072696,0.075628,0.079687,0.36403,0.34819,0.3602,0.35713,0.37639,0.20817,0.20743,0.23928,0.20054,0.19256,0.18805,0.17906,0.16893,0.18182,0.17113,0.17183,0.19692,0.16924,0.15579,0.13583,0.07827,0.081778,0.084166,0.073767,0.081338,0.078078,0.075822,0.075792,0.078774,0.076537,0.079281,0.078046,0.07825,0.072026,0.079525,0.076617,0.075238,0.090894,0.33633,0.35906,0.35402,0.1793,0.19227,0.21892,0.16883,0.18076,0.20583,0.18771,0.18167,0.17755,0.17393,0.14135,0.17798,0.15683,0.16623,0.17728,0.1911,0.16905,0.085355,0.077705,0.073833,0.077229,0.079612,0.076739,0.074174,0.072547,0.076439,0.080278,0.077565,0.069693,0.077997,0.077526,0.075799,0.076161,0.081029,0.079672,0.37833,0.21852,0.20236,0.20843,0.22442,0.21076,0.20137,0.19105,0.20989,0.23632,0.16339,0.15396,0.17969,0.16318,0.18752,0.16856,0.18221,0.17025,0.1601,0.076988,0.07628,0.072774,0.07191,0.077006,0.075829,0.075223,0.087127,0.080518,0.077132,0.071308,0.077641,0.078856,0.079346,0.07691,0.076492,0.075708,0.039949,0.20249,0.16205,0.20692,0.20227,0.19656,0.1985,0.19249,0.19835,0.14336,0.23552,0.17868,0.18102,0.183,0.17149,0.12945,0.17957,0.16406,0.17341,0.19311,0.075316,0.066649,0.073164,0.075799,0.091924,0.059025,0.079615,0.076059,0.077329,0.080917,0.077366,0.079437,0.073261,0.079259,0.082647,0.075913,0.075786,0.041783,0.22024,0.20396,0.2002,0.207,0.27005,0.22744,0.21241,0.19696,0.15348,0.2125,0.1897,0.15898,0.17018,0.1652,0.17923,0.18944,0.171,0.17395,0.07548,0.078063,0.07371,0.085108,0.082386,0.074316,0.077516,0.076641,0.067538,0.080809,0.078544,0.076911,0.076212,0.075164,0.076673,0.076667,0.07923,0.077405,0.040641,0.21925,0.15334,0.23061,0.21346,0.19533,0.21231,0.18592,0.18425,0.17556,0.21159,0.16651,0.18034,0.18489,0.14466,0.17433,0.14778,0.16662,0.17941,0.077446,0.077742,0.078947,0.076127,0.075458,0.075261,0.073717,0.074401,0.082002,0.078181,0.078836,0.078805,0.070868,0.076509,0.076906,0.077307,0.081555,0.039742,0.040193,0.040417,0.23794,0.17397,0.19239,0.2099,0.16998,0.2031,0.20673,0.18255,0.23512,0.18727,0.15514,0.15629,0.15313,0.1778,0.17426,0.078659,0.085023,0.07521,0.07994,0.076515,0.073089,0.077344,0.07144,0.075976,0.07337,0.07958,0.078089,0.085465,0.081006,0.083187,0.07842,0.074376,0.079065,0.040591,0.042049,0.041795,0.039712,0.19039,0.21099,0.21298,0.19969,0.22832,0.20899,0.19155,0.19364,0.1841,0.17742,0.17786,0.189,0.080334,0.076303,0.096326,0.088208,0.081186,0.075165,0.077457,0.075995,0.080114,0.077879,0.076471,0.080318,0.075893,0.07753,0.074139,0.07928,0.075839,0.082152,0.076551,0.068481,0.040733,0.041547,0.042173,0.042531,0.040009,0.040119,0.19067,0.16343,0.20459,0.19943,0.19349,0.23865,0.2269,0.14081,0.078538,0.070602,0.075396,0.076457,0.07743,0.080539,0.091214,0.073662,0.078662,0.079773,0.075193,0.077606,0.073875,0.074974,0.073901,0.075386,0.076436,0.078742,0.074742,0.0761,0.07892,0.088284,0.080351,0.040128,0.040895,0.041094,0.038625,0.038861,0.041741,0.20169,0.14895,0.19472,0.20688,0.17687,0.03993,0.043665,0.076386,0.083658,0.075022,0.078487,0.075726,0.077493,0.077949,0.075347,0.072739,0.077919,0.082417,0.077766,0.076887,0.082154,0.077178,0.084826,0.065497,0.077245,0.076245,0.087808,0.075434,0.042566,0.040758,0.041046,0.040772,0.039754,0.039757,0.040892,0.042564,0.03944,0.040502,0.20193,0.19718,0.041997,0.041215,0.041247,0.041404,0.078191,0.080531,0.060955,0.084453,0.075504,0.078502,0.078699,0.074457,0.080462,0.081582,0.075557,0.072437,0.084811,0.07805,0.088971,0.070755,0.07

3891,0.077305,0.076605,0.042154,0.041194,0.041204,0.038644,0.039476,0.042362,0.04004,0.040155,0.041316,0.039892,0.041638,0.040311,0.040395,0.042372,0.039682,0.040387,0.038965,0.075729,0.086059,0.082997,0.071436,0.08384,0.076606,0.076726,0.084138,0.073251,0.084782,0.076835,0.076037,0.076986,0.085505,0.087542,0.07863,0.042456,0.042542,0.039168,0.041806,0.041839,0.040715,0.043775,0.041826,0.040945,0.041325,0.040695,0.04274,0.040656,0.041138,0.040328,0.04033,0.040979,0.04097,0.04131,0.073882,0.078142,0.076649,0.074325,0.080187,0.07902,0.076904,0.076405,0.076707,0.071166,0.072767,0.075224,0.075534,0.039919,0.040666,0.041164,0.040013,0.040834,0.041257,0.040693,0.041634,0.039437,0.041784,0.040299,0.040525,0.04182,0.039663,0.040305,0.039848,0.041783,0.041504,0.041505,0.042963,0.042876,0.076208,0.088753,0.081938,0.075901,0.075618,0.077778,0.080558,0.087256,0.073971,0.041934,0.040663,0.042182,0.040112,0.038337,0.042507,0.041683,0.041339,0.040829,0.042026,0.041275,0.04083,0.038627,0.042614,0.04184,0.040525,0.040971,0.04143,0.039914,0.040645,0.042263,0.039421,0.040815,0.039733,0.042274,0.070973,0.078645,0.073258,0.077235,0.040725,0.042065,0.041554,0.042139,0.040847,0.039261,0.040967,0.039953,0.042268,0.038605,0.041806,0.039511,0.04216,0.039301,0.042172,0.041859,0.041758,0.03929,0.04041,0.038397,0.042034,0.040621,0.040098,0.040049,0.041583,0.040923,0.040969,0.040456,0.04086,0.043178,0.038438,0.042426,0.03914,0.040907,0.039161,0.041554,0.041476,0.04086,0.037271,0.040102,0.04036,0.042103,0.04135,0.04035,0.040458,0.039386,0.041956,0.040613,0.042846,0.041277,0.040198,0.041815,0.040772,0.040781,0.041029,0.041505,0.041054,0.041267,0.043401,0.042145,0.043659,0.040949,0.039146,0.04039,0.038781,0.040602,0.041823,0.039899,0.038185,0.040608,0.042408,0.040955,0.041549,0.040357,0.041612,0.043247,0.040722,0.042482,0.043167,0.042471,0.04128,0.041516,0.044024,0.040959,0.042278,0.04127,0.042285,0.040568,0.039011,0.039653,0.039913,0.041777,0.039941,0.041591,0.041323,0.041172,0.039786,0.039114,0.041296,0.041372,0.040344,0.040765,0.042597,0.039517,0.041116,0.041687,0.039692,0.042807,0.040397,0.041834,0.039832,0.04246,0.042948,0.040824,0.041508,0.04202,0.040237,0.0426,0.040811,0.041781,0.041711,0.04199,0.041554,0.041966,0.042092,0.041811,0.040986,0.039686,0.039515,0.040985,0.039734,0.040334,0.037842,0.044533,0.042363,0.041566,0.041306,0.042024,0.041629,0.040432,0.041395,0.042949,0.038357,0.03972,0.041884,0.04014,0.041769,0.040657,0.040515,0.041555,0.039396,0.042022,0.039457,0.040643,0.039982,0.04216,0.043091,0.038485,0.041125,0.039443,0.041022,0.041356,0.040026,0.040822,0.040726,0.041862,0.040758,0.043027,0.039985,0.042692,0.042062,0.039686,0.039585,0.041024,0.040871,0.041887,0.041671,0.040839,0.041155,0.04106,0.040938,0.041663,0.041242,0.039771,0.042725,0.039698,0.041286,0.04319,0.040767,0.040141,0.04091,0.041091,0.041872,0.039045,0.041803  
0.10571,0.10778,0.1098,0.10829,0.10948,0.10987,0.10966,0.1125,0.1095,0.11185,0.11126,0.10863,0.11243,0.11045,0.11021,0.11169,0.10855,0.11146,0.1087,0.10544,0.23203,0.20092,0.25394,0.25466,0.11106,0.11069,0.10787,0.10845,0.11068,0.10986,0.11121,0.11088,0.1121,0.11004,0.10921,0.11145,0.10594,0.11149,0.10588,0.32451,0.22267,0.23602,0.23583,0.25288,0.23063,0.23854,0.10948,0.10943,0.11243,0.10858,0.10786,0.10964,0.10844,0.10777,0.10893,0.10408,0.10959,0.11219,0.10962,0.11114,0.10796,0.37963,0.35306,0.22001,0.23616,0.22678,0.23043,0.22474,0.22578,0.23493,0.22857,0.10907,0.10726,0.11098,0.10937,0.10934,0.11194,0.10874,0.10577,0.10857,0.11091,0.1102,0.11013,0.11068,0.10954,0.10997,0.32445,0.36333,0.3326,0.2167,0.23889,0.27044,0.21729,0.22353,0.21967,0.23252,0.23279,0.

22884,0.10922,0.11019,0.11072,0.11,0.10819,0.10925,0.10713,0.10926,0.10968,0.1092,0.10924,0.10985,0.11015,0.11404,0.10846,0.11177,0.35533,0.36805,0.32795,0.35242,0.24482,0.23002,0.2285,0.2411,0.24403,0.22248,0.2116,0.20879,0.24629,0.21336,0.11291,0.10755,0.11067,0.10899,0.11161,0.10784,0.108,0.10959,0.1093,0.11055,0.1094,0.11238,0.10934,0.11155,0.1085,0.11188,0.35831,0.37747,0.33761,0.33725,0.34632,0.35361,0.25553,0.23928,0.23788,0.23555,0.22506,0.25024,0.24292,0.21891,0.22541,0.27133,0.10966,0.10944,0.11004,0.10684,0.10873,0.10749,0.10863,0.10892,0.11084,0.1079,0.10995,0.11217,0.10898,0.10887,0.10933,0.11343,0.11026,0.37648,0.35646,0.36636,0.34728,0.3422,0.34617,0.25807,0.21865,0.23181,0.24524,0.22405,0.24445,0.23114,0.22869,0.2174,0.2493,0.21688,0.11059,0.1083,0.10698,0.11078,0.10924,0.10619,0.10829,0.10946,0.11277,0.11048,0.11258,0.11146,0.10725,0.070509,0.077602,0.079343,0.10685,0.36478,0.37543,0.36813,0.37721,0.39149,0.36362,0.37493,0.20725,0.28791,0.23391,0.27033,0.24297,0.25899,0.22761,0.24093,0.22744,0.2475,0.23779,0.11126,0.11143,0.10665,0.11117,0.11146,0.10901,0.11196,0.11136,0.10746,0.10916,0.11036,0.074969,0.082569,0.076181,0.074028,0.074071,0.074478,0.11186,0.38349,0.37704,0.32468,0.34546,0.3735,0.37064,0.38604,0.23658,0.25074,0.22938,0.22579,0.22782,0.27593,0.22232,0.22205,0.22481,0.23487,0.24154,0.1086,0.11081,0.11158,0.1113,0.10919,0.10984,0.11124,0.1067,0.10805,0.073426,0.077057,0.071892,0.070384,0.074558,0.073222,0.078547,0.075879,0.069829,0.10823,0.37269,0.39738,0.38213,0.40116,0.39478,0.34955,0.33892,0.25113,0.2311,0.24695,0.27393,0.22042,0.24721,0.21428,0.2424,0.2257,0.2285,0.24373,0.22338,0.1118,0.10799,0.10994,0.10997,0.10773,0.10928,0.076179,0.075372,0.080093,0.070109,0.074477,0.075322,0.069239,0.066633,0.071434,0.07695,0.071669,0.077274,0.34226,0.35176,0.37169,0.3622,0.34112,0.37364,0.35352,0.22857,0.24563,0.24548,0.23357,0.22576,0.25477,0.26588,0.23784,0.22583,0.24614,0.23962,0.26914,0.11139,0.10738,0.11038,0.074942,0.062853,0.07571,0.067247,0.076463,0.078426,0.077121,0.073344,0.073217,0.067465,0.074222,0.080238,0.074005,0.075044,0.074751,0.36291,0.35177,0.37385,0.35115,0.37909,0.36349,0.35363,0.3687,0.39457,0.23268,0.25839,0.24346,0.25989,0.23624,0.24275,0.26617,0.23609,0.26676,0.22895,0.2405,0.076519,0.073343,0.074239,0.074698,0.082436,0.075942,0.07082,0.075221,0.076051,0.075003,0.076286,0.08124,0.074656,0.078632,0.071291,0.074533,0.070194,0.077084,0.34942,0.37795,0.36302,0.35097,0.34673,0.37454,0.35759,0.37019,0.34241,0.21611,0.24081,0.16049,0.17103,0.16326,0.19092,0.1604,0.17216,0.16488,0.17092,0.1799,0.073799,0.075608,0.0804,0.07609,0.073437,0.073164,0.076657,0.072648,0.075728,0.073882,0.075829,0.073984,0.078968,0.067943,0.076455,0.076473,0.075255,0.077146,0.35666,0.31955,0.34737,0.38313,0.38031,0.38816,0.3855,0.37439,0.3505,0.20371,0.16512,0.14608,0.17845,0.16611,0.17091,0.18253,0.15711,0.12796,0.15845,0.16376,0.074821,0.07756,0.077182,0.073064,0.071615,0.077179,0.081997,0.075709,0.078329,0.076561,0.057261,0.075028,0.075234,0.075353,0.075688,0.07696,0.073362,0.073749,0.36837,0.35967,0.38051,0.36326,0.33377,0.37243,0.35693,0.21159,0.22901,0.19753,0.1505,0.19601,0.1625,0.15473,0.15792,0.18025,0.17498,0.18543,0.16777,0.17804,0.074624,0.075684,0.079171,0.078699,0.075679,0.07942,0.075822,0.07011,0.074013,0.076211,0.074089,0.07589,0.074808,0.088814,0.073457,0.076095,0.077509,0.088334,0.35847,0.36908,0.36368,0.38083,0.35441,0.3648,0.18983,0.26977,0.17355,0.22836,0.16742,0.17265,0.16677,0.16561,0.11958,0.167,0.17407,0.16726,0.16737,0.17275,0.07142,0.075247,0.0818,0.07173,0.077933,0.079436,0.073074,0.074695,0.068654,0.090431,0.078354,0.079854,0.075983

,0.073134,0.069538,0.070427,0.073739,0.078188,0.36944,0.3471,0.353,0.3529,0.36235,0.20347,0.20708,0.23449,0.19031,0.19878,0.1901,0.17977,0.16756,0.18347,0.16944,0.16609,0.19597,0.16148,0.15791,0.13037,0.076289,0.079674,0.082337,0.072688,0.079226,0.075636,0.073686,0.072426,0.077528,0.074749,0.077005,0.074242,0.075916,0.070216,0.078043,0.075155,0.073707,0.089289,0.32683,0.35165,0.33295,0.17556,0.19576,0.21854,0.16942,0.18072,0.20035,0.18587,0.18261,0.17533,0.17105,0.13981,0.17855,0.15682,0.16538,0.17629,0.18502,0.17249,0.082634,0.076326,0.072578,0.07536,0.077367,0.073463,0.070936,0.071135,0.074273,0.076913,0.074452,0.068218,0.07654,0.076957,0.073176,0.073335,0.079321,0.077836,0.36733,0.21761,0.19703,0.20667,0.22893,0.20988,0.20175,0.18662,0.21227,0.23468,0.15735,0.15401,0.1817,0.1645,0.19067,0.16526,0.17827,0.17338,0.15905,0.074426,0.074884,0.070079,0.069895,0.074952,0.072957,0.07311,0.084947,0.079029,0.074974,0.068357,0.076807,0.076279,0.077498,0.0761,0.073936,0.07352,0.039447,0.20307,0.16182,0.20139,0.19782,0.19671,0.19946,0.19381,0.19314,0.13824,0.22901,0.17711,0.17993,0.18481,0.17016,0.12941,0.17419,0.16817,0.17066,0.19228,0.073297,0.065393,0.071259,0.073404,0.089863,0.057656,0.078061,0.073198,0.075445,0.078282,0.07494,0.076519,0.071023,0.077212,0.079868,0.074939,0.07292,0.040467,0.217,0.20672,0.19792,0.20159,0.26044,0.22863,0.21312,0.19203,0.15563,0.21192,0.18765,0.15401,0.17193,0.15937,0.17394,0.18685,0.16618,0.1717,0.073557,0.076405,0.071062,0.082026,0.079575,0.072456,0.075243,0.073974,0.065241,0.078235,0.076808,0.075551,0.075837,0.073013,0.075173,0.075974,0.077847,0.076263,0.039655,0.21908,0.15336,0.22922,0.2096,0.19758,0.20132,0.18285,0.17997,0.17546,0.20694,0.16335,0.168,0.18062,0.14343,0.17056,0.1459,0.16727,0.17756,0.074436,0.075917,0.076807,0.074212,0.074137,0.073707,0.072242,0.071746,0.079301,0.076067,0.077349,0.076299,0.071048,0.075312,0.074691,0.075292,0.079229,0.038966,0.039766,0.039587,0.2334,0.1775,0.18872,0.20948,0.17117,0.1925,0.21076,0.18031,0.2305,0.18271,0.1505,0.15464,0.15467,0.17338,0.1697,0.076229,0.083359,0.07348,0.076438,0.074892,0.07154,0.075104,0.068757,0.073466,0.070669,0.077899,0.076373,0.083664,0.077945,0.080344,0.076341,0.071923,0.077101,0.040499,0.041117,0.041576,0.040507,0.18788,0.2096,0.20479,0.19532,0.22735,0.21047,0.19533,0.19177,0.18931,0.17675,0.17452,0.18461,0.079207,0.074325,0.092937,0.085243,0.079384,0.073743,0.07457,0.074551,0.078159,0.075802,0.073658,0.078635,0.075426,0.075909,0.071596,0.077657,0.074624,0.080704,0.074536,0.066566,0.040267,0.040589,0.041414,0.041365,0.038766,0.039583,0.19448,0.16152,0.19711,0.20186,0.18549,0.23841,0.22869,0.13953,0.076459,0.068971,0.073023,0.073956,0.075929,0.079099,0.088776,0.073063,0.076559,0.079344,0.073875,0.075952,0.072175,0.073918,0.071773,0.074243,0.075374,0.077931,0.07411,0.073163,0.077035,0.086039,0.077317,0.040251,0.041094,0.040813,0.038602,0.038361,0.04165,0.19946,0.14281,0.19678,0.19805,0.18251,0.03922,0.041676,0.073743,0.082,0.073406,0.076555,0.074776,0.076338,0.075608,0.073219,0.071095,0.076252,0.080192,0.075653,0.074737,0.080504,0.075078,0.082752,0.06401,0.07537,0.075168,0.08457,0.074046,0.041357,0.040905,0.040289,0.04039,0.039534,0.038719,0.03959,0.041698,0.039498,0.039509,0.2014,0.20018,0.040635,0.041276,0.039029,0.039997,0.076078,0.078906,0.059312,0.082681,0.074069,0.07794,0.076595,0.072926,0.078974,0.080833,0.073655,0.069908,0.082136,0.074747,0.086603,0.069401,0.072075,0.073947,0.076363,0.041409,0.040845,0.040929,0.038194,0.039349,0.041295,0.038981,0.039809,0.041122,0.038943,0.041226,0.039642,0.040176,0.04189,0.039462,0.039277,0.038483,0.071912,0.082791,0.081216,0.069689,0.08189



1, 0.074465, 0.075257, 0.082106, 0.070898, 0.082793, 0.075348, 0.074691, 0.074  
416, 0.083637, 0.084679, 0.07422, 0.041077, 0.042511, 0.038416, 0.040357, 0.04  
2089, 0.040886, 0.043412, 0.041674, 0.040478, 0.041076, 0.039672, 0.042308, 0.  
04037, 0.041296, 0.038716, 0.039661, 0.040929, 0.040987, 0.04047, 0.073284, 0.  
075145, 0.074847, 0.072119, 0.077216, 0.077169, 0.074335, 0.07419, 0.074982, 0.  
.070088, 0.070673, 0.073331, 0.073454, 0.03974, 0.039831, 0.040682, 0.040109,  
0.040646, 0.040611, 0.039614, 0.040847, 0.039069, 0.041726, 0.039613, 0.03956  
5, 0.041723, 0.039519, 0.039078, 0.03964, 0.041852, 0.041294, 0.040468, 0.0424  
63, 0.043538, 0.074423, 0.086399, 0.078299, 0.07379, 0.073096, 0.075552, 0.079  
214, 0.084805, 0.071518, 0.041291, 0.040265, 0.041522, 0.039978, 0.03898, 0.04  
2198, 0.040807, 0.040754, 0.039896, 0.041899, 0.0404, 0.040399, 0.0389, 0.0418  
92, 0.040696, 0.040382, 0.040747, 0.041032, 0.039638, 0.040542, 0.040882, 0.03  
9023, 0.039865, 0.038949, 0.041764, 0.069691, 0.076877, 0.071349, 0.075612, 0.  
039901, 0.04211, 0.041454, 0.042159, 0.040839, 0.039097, 0.040976, 0.039397, 0.  
.042015, 0.038836, 0.040372, 0.038145, 0.041503, 0.039044, 0.041635, 0.040982  
, 0.041402, 0.038983, 0.040493, 0.038673, 0.041135, 0.041334, 0.040064, 0.0398  
67, 0.041574, 0.039712, 0.040893, 0.040491, 0.040448, 0.042795, 0.038635, 0.04  
1561, 0.038277, 0.040574, 0.039047, 0.040745, 0.042561, 0.039524, 0.037934, 0.  
040373, 0.039985, 0.042097, 0.040953, 0.039579, 0.04045, 0.037785, 0.040797, 0.  
.040281, 0.042508, 0.039786, 0.038095, 0.03981, 0.040122, 0.040284, 0.040373,  
0.041167, 0.040884, 0.04017, 0.043499, 0.041551, 0.043301, 0.039812, 0.038585  
, 0.03993, 0.037546, 0.039336, 0.041304, 0.040973, 0.03827, 0.041016, 0.041798  
, 0.039673, 0.041156, 0.040154, 0.041308, 0.042577, 0.040151, 0.042155, 0.0418  
23, 0.042381, 0.040451, 0.040188, 0.043726, 0.039348, 0.041683, 0.040646, 0.04  
1734, 0.039237, 0.038047, 0.038629, 0.039471, 0.04164, 0.040171, 0.040883, 0.0  
40649, 0.039999, 0.03881, 0.039787, 0.041341, 0.040987, 0.039856, 0.039811, 0.  
041561, 0.038944, 0.039654, 0.041141, 0.03941, 0.041621, 0.039544, 0.040899, 0.  
.039281, 0.041665, 0.042105, 0.040771, 0.041142, 0.04159, 0.040559, 0.042155,  
0.041231, 0.04056, 0.039866, 0.041194, 0.040783, 0.042319, 0.041652, 0.041097  
, 0.040732, 0.038948, 0.038985, 0.040742, 0.039958, 0.0395, 0.037549, 0.0432, 0.  
.041211, 0.040696, 0.039859, 0.04139, 0.041058, 0.040285, 0.039902, 0.041816,  
0.038296, 0.039943, 0.04133, 0.039162, 0.04195, 0.0402, 0.040492, 0.041082, 0.  
039875, 0.040324, 0.038543, 0.040496, 0.039092, 0.041868, 0.042239, 0.037824,  
0.040893, 0.037992, 0.039818, 0.040017, 0.039505, 0.040396, 0.039649, 0.04059  
3, 0.040794, 0.041952, 0.039477, 0.042327, 0.042248, 0.039227, 0.040303, 0.040  
211, 0.040227, 0.040942, 0.04163, 0.040556, 0.04009, 0.04079, 0.040148, 0.0410  
54, 0.041685, 0.039693, 0.042105, 0.039416, 0.03896, 0.042472, 0.0401, 0.04031  
3, 0.040958, 0.040644, 0.041252, 0.038757, 0.041078  
0.10423, 0.10627, 0.10546, 0.10475, 0.10666, 0.10749, 0.10741, 0.10844, 0.1065  
4, 0.1079, 0.10786, 0.10632, 0.10916, 0.10632, 0.10717, 0.11003, 0.10592, 0.108  
13, 0.1062, 0.10437, 0.22417, 0.19248, 0.24636, 0.25074, 0.10924, 0.10802, 0.10  
534, 0.10581, 0.10916, 0.10687, 0.10839, 0.10798, 0.10956, 0.10622, 0.1059, 0.1  
0876, 0.10312, 0.10882, 0.10339, 0.32503, 0.21926, 0.23548, 0.22653, 0.24612, 0.  
.22285, 0.23499, 0.10667, 0.10705, 0.10973, 0.10684, 0.10549, 0.10747, 0.1054,  
0.1062, 0.10733, 0.10171, 0.10738, 0.10885, 0.10607, 0.10747, 0.10406, 0.3834,  
0.34883, 0.22203, 0.24041, 0.22428, 0.23337, 0.221, 0.22147, 0.23015, 0.22899,  
0.10635, 0.10415, 0.10825, 0.10747, 0.10521, 0.10778, 0.10804, 0.10317, 0.1058  
5, 0.10699, 0.10881, 0.10844, 0.10671, 0.10692, 0.10783, 0.33937, 0.36149, 0.33  
908, 0.21141, 0.23735, 0.26877, 0.21765, 0.21424, 0.21961, 0.23051, 0.23115, 0.  
22974, 0.10614, 0.10781, 0.10849, 0.10622, 0.1053, 0.1045, 0.10453, 0.10515, 0.  
10707, 0.10778, 0.10721, 0.10741, 0.10847, 0.1098, 0.10643, 0.10883, 0.34165, 0.  
.36477, 0.33125, 0.35091, 0.23908, 0.2345, 0.22835, 0.24797, 0.24542, 0.22297,

0.21566,0.20515,0.2352,0.20866,0.10932,0.10344,0.10829,0.1058,0.10841,  
0.10507,0.10538,0.10746,0.10596,0.10673,0.1073,0.10936,0.10648,0.10917  
,0.10583,0.10809,0.36045,0.37293,0.34987,0.34658,0.3397,0.35475,0.2532  
,0.23485,0.23854,0.22807,0.22559,0.24047,0.2405,0.21615,0.22629,0.2692  
8,0.10722,0.10786,0.10844,0.10334,0.10591,0.10412,0.10543,0.10577,0.10  
772,0.10492,0.10625,0.1093,0.10602,0.10678,0.10659,0.10961,0.10717,0.3  
6189,0.36346,0.35814,0.34649,0.3484,0.35504,0.25859,0.21402,0.21871,0.  
24804,0.21888,0.24059,0.23601,0.2353,0.21461,0.24687,0.21486,0.10638,0  
.10469,0.10375,0.10745,0.10745,0.10319,0.10647,0.10817,0.1102,0.10664,  
0.10978,0.10836,0.10537,0.069183,0.075277,0.077966,0.10326,0.37156,0.3  
8142,0.36428,0.37123,0.40574,0.38386,0.38622,0.20377,0.2879,0.24109,0.  
27362,0.24252,0.25059,0.22166,0.23624,0.22617,0.24104,0.23256,0.10856,  
0.1071,0.104,0.10809,0.10984,0.10696,0.10937,0.1083,0.10453,0.10594,0.  
10716,0.072275,0.080609,0.07495,0.071804,0.073545,0.073123,0.10828,0.3  
6755,0.36605,0.33281,0.34949,0.37082,0.37447,0.38651,0.23883,0.25185,0.  
.22898,0.2226,0.23123,0.27017,0.22001,0.22151,0.22882,0.22468,0.23347,  
0.10611,0.10731,0.10963,0.10745,0.10668,0.10517,0.10813,0.10439,0.1045  
4,0.071868,0.075052,0.070317,0.068693,0.073766,0.07245,0.077222,0.0735  
92,0.067491,0.10659,0.37915,0.39279,0.36967,0.3964,0.39254,0.35482,0.3  
3344,0.24629,0.23493,0.24296,0.27045,0.21422,0.24689,0.20928,0.2355,0.  
22473,0.22044,0.23884,0.22328,0.10935,0.10511,0.10656,0.1084,0.10552,0  
.10598,0.073991,0.073065,0.077828,0.067913,0.073328,0.074154,0.067303,  
0.065077,0.069677,0.075366,0.071872,0.074513,0.33512,0.35885,0.36779,0  
.36263,0.36157,0.37337,0.34652,0.22564,0.24161,0.24199,0.22472,0.22452  
,0.24973,0.25985,0.23317,0.22633,0.24534,0.23622,0.26117,0.10868,0.104  
31,0.10673,0.072922,0.060975,0.073515,0.064891,0.074803,0.07623,0.0755  
84,0.071984,0.072527,0.066465,0.0726,0.078153,0.071846,0.073433,0.0734  
28,0.37861,0.35288,0.35982,0.34362,0.37141,0.3605,0.36661,0.36633,0.38  
265,0.23112,0.25002,0.24267,0.2578,0.23047,0.2428,0.2619,0.23236,0.260  
87,0.22295,0.23728,0.07463,0.071529,0.07175,0.072338,0.080659,0.07468,  
0.068949,0.073034,0.073574,0.074038,0.075299,0.08008,0.073518,0.077325  
,0.070046,0.071328,0.068859,0.075626,0.3375,0.36113,0.36292,0.36051,0.  
33277,0.36962,0.3625,0.35966,0.33905,0.2132,0.23732,0.15782,0.16159,0.  
167,0.18696,0.15621,0.17202,0.1606,0.17146,0.17046,0.071817,0.075619,0  
.077687,0.073786,0.072466,0.070494,0.074347,0.071642,0.075166,0.07245,  
0.073828,0.071387,0.077805,0.066358,0.07506,0.073191,0.074407,0.075475  
,0.34774,0.33952,0.34027,0.37202,0.37354,0.39664,0.38209,0.38452,0.337  
87,0.20653,0.16309,0.14155,0.17702,0.16382,0.17221,0.17954,0.15435,0.1  
2861,0.16046,0.16272,0.07238,0.075888,0.075327,0.072286,0.070773,0.075  
565,0.080138,0.075036,0.075593,0.075928,0.056392,0.073964,0.074555,0.0  
73528,0.073427,0.074934,0.071665,0.072645,0.35807,0.36581,0.36608,0.35  
3,0.33212,0.36044,0.34863,0.21206,0.22539,0.18724,0.15009,0.19676,0.15  
736,0.15167,0.15705,0.17796,0.17392,0.18148,0.1637,0.17525,0.072455,0.  
073536,0.078643,0.075614,0.073731,0.077085,0.073888,0.069394,0.072101,  
0.074822,0.073146,0.072982,0.073957,0.086253,0.070983,0.07456,0.075197  
,0.084971,0.35981,0.36246,0.35025,0.3843,0.3504,0.36493,0.19251,0.2706  
5,0.17215,0.23021,0.17133,0.16821,0.16446,0.16656,0.11975,0.15951,0.17  
018,0.16306,0.16904,0.1739,0.070758,0.073242,0.080373,0.069285,0.07570  
2,0.077662,0.072414,0.073736,0.067838,0.087727,0.077192,0.077416,0.074  
746,0.071569,0.068673,0.068227,0.071985,0.077948,0.38555,0.35604,0.358  
6,0.35238,0.3667,0.20101,0.20971,0.23532,0.18554,0.19624,0.18902,0.172  
47,0.16564,0.18357,0.16874,0.16554,0.1989,0.15843,0.15426,0.12655,0.07

4954,0.078014,0.080554,0.071272,0.077221,0.073587,0.07247,0.070636,0.07674,0.074317,0.074788,0.072917,0.074685,0.06933,0.076475,0.073754,0.072307,0.086782,0.32844,0.34972,0.33454,0.17279,0.20856,0.21367,0.16949,0.16956,0.20354,0.1859,0.18406,0.16871,0.16925,0.1389,0.17578,0.15325,0.16255,0.17912,0.18428,0.17293,0.08048,0.074366,0.071175,0.074307,0.075389,0.071759,0.069827,0.069588,0.073966,0.076077,0.073292,0.066607,0.076454,0.073571,0.072897,0.071282,0.078696,0.075864,0.3682,0.21474,0.18508,0.20064,0.23464,0.20743,0.2022,0.1911,0.20956,0.23348,0.15729,0.15076,0.17455,0.16307,0.19457,0.16444,0.17811,0.16779,0.16087,0.073068,0.074405,0.067572,0.068613,0.072718,0.071496,0.071313,0.082633,0.077686,0.072414,0.067003,0.075351,0.074608,0.075423,0.073807,0.073037,0.071481,0.039499,0.20611,0.1594,0.19789,0.1937,0.19526,0.20163,0.18961,0.18926,0.13833,0.22659,0.17874,0.17837,0.18285,0.1706,0.12921,0.17452,0.16135,0.17079,0.18773,0.072337,0.063543,0.070395,0.072268,0.087718,0.057651,0.07629,0.072518,0.073559,0.077187,0.074453,0.074832,0.070154,0.075731,0.078457,0.073495,0.070862,0.040136,0.21642,0.19419,0.19313,0.20369,0.26051,0.23102,0.21091,0.1903,0.15117,0.2078,0.18526,0.15186,0.16555,0.15664,0.17327,0.18444,0.17043,0.17498,0.072206,0.07385,0.069817,0.079151,0.077072,0.070314,0.074146,0.07185,0.063563,0.07627,0.075353,0.073384,0.074385,0.072667,0.073073,0.074932,0.075187,0.073789,0.03903,0.21758,0.14861,0.22933,0.20524,0.20212,0.19766,0.18875,0.18423,0.16946,0.20055,0.16347,0.16758,0.18015,0.14061,0.16804,0.1431,0.16714,0.17614,0.072713,0.074257,0.076535,0.071866,0.072336,0.071667,0.070706,0.070105,0.078158,0.074944,0.075456,0.073811,0.06937,0.073075,0.073411,0.074786,0.077664,0.038377,0.040198,0.03904,0.23112,0.17585,0.18363,0.20478,0.17295,0.19177,0.20928,0.18009,0.22992,0.17422,0.14503,0.15176,0.15422,0.16826,0.16424,0.075221,0.08022,0.071687,0.075249,0.073641,0.070134,0.072397,0.067374,0.071986,0.068351,0.076446,0.075137,0.082282,0.076833,0.078627,0.074899,0.069528,0.074083,0.040837,0.04111,0.04121,0.040779,0.19197,0.2046,0.20785,0.19602,0.2289,0.21277,0.18458,0.18752,0.1864,0.17561,0.17337,0.18032,0.077819,0.072575,0.091542,0.082774,0.077797,0.071414,0.073983,0.07283,0.076269,0.073802,0.072473,0.076568,0.074296,0.074272,0.069788,0.076007,0.07274,0.07862,0.072562,0.064843,0.040216,0.040322,0.041273,0.04237,0.037649,0.039711,0.19897,0.1602,0.20177,0.19485,0.18395,0.23754,0.22822,0.13665,0.075177,0.06677,0.071561,0.072862,0.074516,0.077113,0.086503,0.070898,0.075622,0.077229,0.072017,0.074761,0.070491,0.0717,0.069281,0.073364,0.072877,0.075881,0.072835,0.072551,0.07611,0.083907,0.075375,0.0404,0.039761,0.040521,0.038668,0.03748,0.041376,0.19281,0.13981,0.19857,0.19348,0.18121,0.038828,0.041324,0.073879,0.080505,0.071808,0.073965,0.073569,0.074782,0.073831,0.071972,0.069349,0.074851,0.077862,0.07438,0.072417,0.077861,0.075051,0.080809,0.062192,0.073953,0.073652,0.082705,0.071966,0.041171,0.039533,0.040025,0.039813,0.040231,0.037657,0.039539,0.040546,0.039321,0.039124,0.19831,0.1984,0.041452,0.041808,0.038114,0.039607,0.075287,0.076602,0.058013,0.080084,0.071507,0.075938,0.075313,0.071821,0.077821,0.077763,0.072341,0.068284,0.079647,0.074117,0.084756,0.067456,0.070583,0.072642,0.075287,0.041949,0.040049,0.041142,0.037231,0.040133,0.041303,0.038773,0.038796,0.039321,0.038791,0.040112,0.039283,0.040065,0.041488,0.039386,0.040663,0.037657,0.070954,0.080765,0.078707,0.068545,0.07993,0.07248,0.074551,0.080138,0.068478,0.081128,0.074005,0.073323,0.073485,0.08249,0.082273,0.073573,0.039436,0.04313,0.03752,0.038978,0.041337,0.041382,0.042336,0.041321,0.041198,0.041085,0.039205,0.041802,0.





|         |         |         |         |         |         |
|---------|---------|---------|---------|---------|---------|
| 0.5     | 0.47625 | 0.59491 | 0.4675  | 0       | 0       |
| 0       | 0       | 0       | 0       | 0       | 0       |
| 0       | 0       | 0       | 0       | 0       | 0       |
| 0       | 0       | 0       | 0       | 0       | 0       |
| 0.44539 | 0.63258 | 0.54562 | 0.46147 | 0.52795 | 0.53033 |
| 0.51434 | 0.5     | 0.53699 | 0.50162 | 0.55101 | 0.50102 |
| 0.4872  | 0.5     | 0.5024  | 0.49392 | 0.54823 | 0.56679 |
| 0       | 0       | 0       | 0       | 0       | 0       |
| 0       | 0       | 0       | 0       | 0       | 0.33333 |
| 0.36045 | 0.33254 | 0.33333 | 0.31483 | 0.33333 | 0.35352 |
| 0.2958  | 0.33457 | 0.5     | 0.52409 | 0.47566 | 0.4918  |
| 0.47211 | 0.56883 | 0.5     | 0.63945 | 0.44411 | 0.57223 |
| 0.42274 | 0.47471 | 0.5     | 0.53171 | 0.5     | 0.42856 |
| 0.46292 | 0.51891 | 0       | 0       | 0       | 0       |
| 0       | 0       | 0       | 0       | 0       | 0.47639 |
| 0.36443 | 0.34415 | 0.38149 | 0.34935 | 0.33999 | 0.34695 |
| 0.27662 | 0.29544 | 0.33731 | 0.31203 | 0.41929 | 0.64051 |
| 0.5     | 0.58852 | 0.45171 | 0.49619 | 0.5     | 0.63773 |
| 0.51358 | 0.50312 | 0.31188 | 0.52043 | 0.5     | 0.52639 |
| 0.38596 | 0.43564 | 0.5     | 0.52439 | 0       | 0       |
| 0       | 0       | 0       | 0       | 0       | 0.58291 |
| 0.5529  | 0.5     | 0.34739 | 0.41405 | 0.18561 | 0.42715 |
| 0.33767 | 0.35601 | 0.2842  | 0.34627 | 0.30608 | 0.35819 |
| 0.49305 | 0.5     | 0.52165 | 0.52585 | 0.54942 | 0.56703 |
| 0.41442 | 0.45258 | 0.50427 | 0.50578 | 0.53239 | 0.5     |
| 0.5     | 0.5     | 0.44702 | 0.5     | 0.62406 | 0.52734 |
| 0       | 0       | 0       | 0       | 0       | 0       |
| 0.51448 | 0.47413 | 0.53609 | 0.49051 | 0.49635 | 0.35303 |
| 0.39567 | 0.37013 | 0.38022 | 0.36257 | 0.28305 | 0.38464 |
| 0.39266 | 0.28355 | 0.36739 | 0.51942 | 0.5     | 0.40079 |
| 0.59    | 0.44178 | 0.5     | 0.50851 | 0.54461 | 0.52521 |
| 0.5     | 0.49998 | 0.41896 | 0.51886 | 0.55148 | 0.43023 |
| 0.39862 | 0.5     | 0       | 0       | 0       | 0       |
| 0       | 0.35644 | 0.5     | 0.65417 | 0.52498 | 0.40666 |
| 0.45882 | 0.32158 | 0.39046 | 0.32688 | 0.35308 | 0.33333 |
| 0.33333 | 0.31141 | 0.31773 | 0.26491 | 0.51537 | 0.5     |
| 0.5     | 0.42774 | 0.53229 | 0.5     | 0.5     | 0.5917  |
| 0.38462 | 0.49609 | 0.44422 | 0.57905 | 0.5415  | 0.35254 |
| 0.55072 | 0.55507 | 0.5     | 0.56795 | 0       | 0       |
| 0       | 0.61725 | 0.48066 | 0.52411 | 0.58943 | 0.5     |
| 0.49686 | 0.53775 | 0.5     | 0.35994 | 0.34149 | 0.32952 |
| 0.29964 | 0.33949 | 0.34958 | 0.35264 | 0.37488 | 0.29503 |
| 0.60149 | 0.59889 | 0.4867  | 0.41857 | 0.5     | 0.5     |
| 0.46238 | 0.5     | 0.60468 | 0.48365 | 0.55041 | 0.4847  |
| 0.40507 | 0.49617 | 0.48159 | 0.49893 | 0.50041 | 0.5     |
| 0       | 0.54821 | 0.5     | 0.47587 | 0.49856 | 0.36174 |
| 0.62139 | 0.49741 | 0.52998 | 0.39218 | 0.33333 | 0.33081 |
| 0.35209 | 0.3541  | 0.29478 | 0.34211 | 0.30152 | 0.36252 |
| 0.33455 | 0.5     | 0.50514 | 0.58108 | 0.5     | 0.5     |
| 0.54697 | 0.56266 | 0.40991 | 0.39531 | 0.58902 | 0.5     |
| 0.5     | 0.55949 | 0.46914 | 0.58549 | 0.43427 | 0.34358 |
| 1       | 0.50491 | 0.5     | 0.5     | 0.4949  | 0.5     |

|         |         |         |         |         |         |
|---------|---------|---------|---------|---------|---------|
| 0.46648 | 0.52504 | 0.40941 | 0.60995 | 0.42063 | 0.41417 |
| 0.36835 | 0.33507 | 0.33333 | 0.36138 | 0.35261 | 0.29451 |
| 0.34444 | 0.39094 | 0.5     | 0.53616 | 0.45665 | 0.5     |
| 0.41156 | 0.5259  | 0.51761 | 0.5     | 0.47277 | 0.5     |
| 0.5     | 0.60625 | 0.658   | 0.5     | 0.5     | 0.56607 |
| 0.56615 | 1       | 0.38582 | 0.5     | 0.5     | 0.45139 |
| 0.48751 | 0.48194 | 0.51921 | 0.49176 | 0.52542 | 0.51179 |
| 0.33333 | 0.2181  | 0.30592 | 0.33418 | 0.26427 | 0.33333 |
| 0.40431 | 0.3728  | 0.56999 | 0.53641 | 0.55726 | 0.55579 |
| 0.5     | 0.5     | 0.45132 | 0.5     | 0.46311 | 0.55202 |
| 0.17697 | 0.5576  | 0.43777 | 0.4486  | 0.48786 | 0.62278 |
| 0.5     | 0.5     | 1       | 0.37772 | 0.5     | 0.59003 |
| 0.39599 | 0.55476 | 0.5     | 0.51728 | 0.53677 | 0.46786 |
| 0.46271 | 0.33333 | 0.37163 | 0.3142  | 0.28273 | 0.31418 |
| 0.23489 | 0.36846 | 0.34616 | 0.57936 | 0.5372  | 0.40531 |
| 0.5     | 0.71277 | 0.45083 | 0.5     | 0.40184 | 0.54253 |
| 0.40152 | 0.44906 | 0.38569 | 0.46265 | 0.54369 | 0.5     |
| 0.56468 | 0.57708 | 1       | 1       | 1       | 0.54053 |
| 0.53013 | 0.51679 | 0.48076 | 0.38498 | 0.5319  | 0.5     |
| 0.48592 | 0.5     | 0.34602 | 0.24772 | 0.33004 | 0.29655 |
| 0.32256 | 0.3732  | 0.48384 | 0.5     | 0.5     | 0.573   |
| 0.49375 | 0.44304 | 0.61127 | 0.5     | 0.34187 | 0.5     |
| 0.51194 | 0.50282 | 0.5     | 0.5     | 0.30612 | 0.41072 |
| 0.5338  | 0.52113 | 1       | 1       | 1       | 1       |
| 0.6046  | 0.62804 | 0.35479 | 0.4524  | 0.43578 | 0.48426 |
| 0.49099 | 0.77729 | 0.49809 | 0.25233 | 0.39275 | 0.33333 |
| 0.50779 | 0.5     | 0.56327 | 0.55475 | 0.54629 | 0.50744 |
| 0.49754 | 0.47935 | 0.55074 | 0.57974 | 0.5     | 0.432   |
| 0.57592 | 0.51053 | 0.49131 | 0.5     | 0.44881 | 0.55814 |
| 0.4096  | 0.49993 | 1       | 1       | 1       | 1       |
| 1       | 1       | 0.39444 | 0.47807 | 0.5     | 0.47352 |
| 0.45017 | 0.33081 | 0.49428 | 0.52105 | 0.5     | 0.41036 |
| 0.60726 | 0.41241 | 0.59118 | 0.5     | 0.5     | 0.55047 |
| 0.45859 | 0.49929 | 0.48164 | 0.46153 | 0.51583 | 0.50318 |
| 0.50251 | 0.5     | 0.55028 | 0.47691 | 0.51884 | 0.31824 |
| 0.57687 | 0.49392 | 0.5     | 1       | 1       | 1       |
| 1       | 1       | 1       | 0.48931 | 0.51802 | 0.5     |
| 0.43278 | 0.5     | 1       | 1       | 0.56676 | 0.53575 |
| 0.53182 | 0.50779 | 0.53679 | 0.5     | 0.49251 | 0.5     |
| 0.52155 | 0.47282 | 0.48458 | 0.5     | 0.53857 | 0.60452 |
| 0.43809 | 0.436   | 0.38469 | 0.5     | 0.44838 | 0.5     |
| 0.5     | 1       | 1       | 1       | 1       | 1       |
| 1       | 1       | 1       | 1       | 1       | 0.44974 |
| 0.47747 | 1       | 1       | 1       | 1       | 0.5087  |
| 0.5     | 0.54631 | 0.44851 | 0.55075 | 0.40081 | 0.48689 |
| 0.54337 | 0.5     | 0.49638 | 0.48036 | 0.39925 | 0.45674 |
| 0.5     | 0.54328 | 0.55434 | 0.5     | 0.46298 | 0.52429 |
| 1       | 1       | 1       | 1       | 1       | 1       |
| 1       | 1       | 1       | 1       | 1       | 1       |
| 1       | 1       | 1       | 1       | 1       | 0.5     |
| 0.53601 | 0.5     | 0.5     | 0.52829 | 0.5     | 0.47724 |
| 0.52247 | 0.5     | 0.38797 | 0.56495 | 0.44273 | 0.49164 |





|         |         |         |         |         |         |         |
|---------|---------|---------|---------|---------|---------|---------|
| 1       | 1       | 0.5     | 0.64461 | 0.57444 | 0.55629 |         |
| 1       | 1       | 1       | 1       | 1       | 1       |         |
| 1       | 1       | 1       | 1       | 1       | 1       |         |
| 1       | 1       | 1       | 0       | 0.41079 | 0.55446 |         |
| 0.44996 | 0.55644 | 0.5     | 0.49659 |         | 1       | 1       |
| 1       | 1       | 1       | 1       | 1       | 1       |         |
| 1       | 1       | 1       | 1       | 1       | 1       |         |
| 1       | 0       | 0       | 0.53247 | 0.34808 | 0.49529 |         |
| 0.48233 | 0.39892 | 0.34138 | 0.53793 | 0.44239 |         | 1       |
| 1       | 1       | 1       | 1       | 1       | 1       |         |
| 1       | 1       | 1       | 1       | 1       | 1       |         |
| 1       | 1       | 0       | 0       | 0       | 0.47124 |         |
| 0.55792 | 0.45959 | 0.4019  | 0.60403 |         | 0.5     | 0.52563 |
| 0.44276 | 0.5     | 1       | 1       | 1       | 1       | 1       |
| 1       | 1       | 1       | 1       | 1       | 1       |         |
| 1       | 1       | 1       | 1       | 1       | 1       |         |
| 0       | 0       | 0       | 0       | 0.5     | 0.5     | 0.5     |
| 0.49095 | 0.51536 | 0.4116  |         | 0.5     | 0.51936 | 0.5     |
| 0.44619 | 0.47563 | 1       |         | 1       | 1       | 1       |
| 1       | 1       | 1       | 1       | 1       | 1       |         |
| 1       | 1       | 1       | 1       | 1       | 1       |         |
| 0       | 0       | 0       | 0       | 0       | 0       |         |
| 0.5     | 0.52101 | 0.55424 | 0.50117 | 0.51471 |         | 0.5     |
| 0.51297 |         | 0.5     | 0.49215 | 0.43785 | 1       | 1       |
| 1       | 1       | 1       | 1       | 1       | 1       |         |
| 1       | 1       | 1       | 1       | 1       | 1       |         |
| 1       | 1       | 1       | 0       | 0       | 0       |         |
| 0       | 0       | 0       | 0.53762 | 0.456   | 0.50768 |         |
| 0.5     | 0.5675  | 0.5     | 0.54921 | 0.72656 | 0.54783 |         |
| 0.44906 | 0.5     |         | 1       | 1       | 1       | 1       |
| 1       | 1       | 1       | 1       | 1       | 1       |         |
| 1       | 1       | 1       | 0.5     | 0.33229 | 0.60002 |         |
| 1       | 0       | 0       | 0       | 0       | 0       |         |
| 0       | 0       | 0.5     | 0.50049 | 0.50129 | 0.55446 |         |
| 0.51426 |         | 0.5     | 0.58112 | 0.5     | 0.45363 | 0.45385 |
| 0.46534 |         | 1       | 1       | 1       | 1       | 1       |
| 1       | 1       | 1       | 1       | 1       | 1       |         |
| 0.48058 | 0.43227 | 0.5738  | 0.28168 | 0.42959 | 0.51184 |         |
| 1       | 0       | 0       | 0       | 0       | 0       |         |
| 0       | 0       | 0.47146 | 0.46266 | 0.5     | 0.5     |         |
| 0.58736 | 0.54818 | 0.56718 | 0.52179 | 0.4409  | 0.35145 |         |
| 0.55305 |         | 1       | 1       | 1       | 1       | 1       |
| 1       | 1       | 1       | 1       | 0.39909 | 0.50833 |         |
| 0.48839 | 0.41828 | 0.62193 | 0.44023 |         | 0.5     | 0.5     |
| 0.64439 |         | 1       | 0       | 0       | 0       | 0       |
| 0       | 0       | 0       | 0.33206 | 0.51218 | 0.49852 |         |
| 0.5     | 0.47755 | 0.45008 | 0.47003 | 0.47987 | 0.49462 |         |
| 0.55612 | 0.5207  |         | 0.5     | 1       | 1       | 1       |
| 1       | 1       | 1       | 0.57168 | 0.48403 | 0.48193 |         |
| 0.5306  | 0.50408 | 0.45665 | 0.53542 | 0.54532 | 0.52923 |         |
| 0.5     | 0.49439 | 0.5     | 0       | 0       | 0       |         |
| 0       | 0       | 0       | 0       | 0.6163  | 0.60815 |         |

|         |         |         |         |         |         |
|---------|---------|---------|---------|---------|---------|
| 0.64255 | 0.48212 | 0.5     | 0.5     | 0.53129 | 0.5     |
| 0.51981 | 0.55202 | 0.51183 | 0.39454 | 1       | 1       |
| 1       | 0.57087 | 0.51002 | 0.53771 | 0.49011 | 0.38351 |
| 0.62078 | 0.44131 | 0.42778 | 0.5     | 0.46551 | 0.5     |
| 0.5     | 0.52375 | 0.40509 | 0.5325  | 0       | 0       |
| 0       | 0       | 0       | 0       | 0       | 0       |
| 0       | 0.50281 | 0.54925 | 0.5145  | 0.52108 | 0.59692 |
| 0.5     | 0.46089 | 0.34493 | 0.49287 | 0.55843 | 0.57496 |
| 0.55461 | 0.36742 | 0.45438 | 0.53853 | 0.47205 | 0.46967 |
| 0.48566 | 0.5     | 0.46301 | 0.49838 | 0.44899 | 0.49898 |
| 0.5128  | 0.5     | 0.4976  | 0.50608 | 0.45177 | 0.43321 |
| 0       | 0       | 0       | 0       | 0       | 0       |
| 0       | 0       | 0       | 0.52496 | 0.5     | 0.33333 |
| 0.3156  | 0.28396 | 0.33333 | 0.34259 | 0.33333 | 0.29296 |
| 0.3521  | 0.33087 | 0.5     | 0.47591 | 0.52434 | 0.5082  |
| 0.52789 | 0.43117 | 0.5     | 0.36055 | 0.55589 | 0.42777 |
| 0.57726 | 0.52529 | 0.5     | 0.46829 | 0.5     | 0.57144 |
| 0.53708 | 0.48109 | 0       | 0       | 0       | 0       |
| 0       | 0       | 0       | 0       | 0       | 0       |
| 0.25117 | 0.32075 | 0.2973  | 0.27548 | 0.32002 | 0.34695 |
| 0.34078 | 0.35228 | 0.32538 | 0.34398 | 0.58071 | 0.35949 |
| 0.5     | 0.41148 | 0.54829 | 0.50381 | 0.5     | 0.36227 |
| 0.48642 | 0.49688 | 0.68812 | 0.47957 | 0.5     | 0.47361 |
| 0.61404 | 0.56436 | 0.5     | 0.47561 | 0       | 0       |
| 0       | 0       | 0       | 0       | 0       | 0       |
| 0       | 0       | 0.30521 | 0.21024 | 0.42836 | 0.30778 |
| 0.33767 | 0.28799 | 0.38832 | 0.34627 | 0.34696 | 0.35819 |
| 0.50695 | 0.5     | 0.47835 | 0.47415 | 0.45058 | 0.43297 |
| 0.58558 | 0.54742 | 0.49573 | 0.49422 | 0.46761 | 0.5     |
| 0.5     | 0.5     | 0.55298 | 0.5     | 0.37594 | 0.47266 |
| 0       | 0       | 0       | 0       | 0       | 0       |
| 0       | 0       | 0       | 0       | 0       | 0.34251 |
| 0.29369 | 0.25974 | 0.28997 | 0.32313 | 0.35847 | 0.23071 |
| 0.33325 | 0.33967 | 0.63261 | 0.48058 | 0.5     | 0.59921 |
| 0.41    | 0.55822 | 0.5     | 0.49149 | 0.45539 | 0.47479 |
| 0.5     | 0.50002 | 0.58104 | 0.48114 | 0.44852 | 0.56977 |
| 0.60138 | 0.5     | 0       | 0       | 0       | 0       |
| 0       | 0       | 0       | 0       | 0       | 0       |
| 0       | 0.32386 | 0.39046 | 0.31989 | 0.29384 | 0.33333 |
| 0.33333 | 0.37236 | 0.349   | 0.36755 | 0.48463 | 0.5     |
| 0.5     | 0.57226 | 0.46771 | 0.5     | 0.5     | 0.4083  |
| 0.61538 | 0.50391 | 0.55578 | 0.42095 | 0.4585  | 0.64746 |
| 0.44928 | 0.44493 | 0.5     | 0.43205 | 0       | 0       |
| 0       | 0       | 0       | 0       | 0       | 0       |
| 0       | 0       | 0       | 0.35994 | 0.34149 | 0.30779 |
| 0.35018 | 0.32103 | 0.41327 | 0.29472 | 0.34855 | 0.36429 |
| 0.39851 | 0.40111 | 0.5133  | 0.58143 | 0.5     | 0.5     |
| 0.53762 | 0.5     | 0.39532 | 0.51635 | 0.44959 | 0.5153  |
| 0.59493 | 0.50383 | 0.51841 | 0.50107 | 0.49959 | 0.5     |
| 0       | 0       | 0       | 0       | 0       | 0       |
| 0       | 0       | 0       | 0       | 0.33333 | 0.48091 |
| 0.26926 | 0.34607 | 0.33743 | 0.34211 | 0.34326 | 0.41113 |

|         |         |         |         |         |         |
|---------|---------|---------|---------|---------|---------|
| 0.33455 | 0.5     | 0.49486 | 0.41892 | 0.5     | 0.5     |
| 0.45303 | 0.43734 | 0.59009 | 0.60469 | 0.41098 | 0.5     |
| 0.5     | 0.44051 | 0.53086 | 0.41451 | 0.56573 | 0.65642 |
| 0       | 0       | 0       | 0       | 0       | 0       |
| 0       | 0       | 0       | 0       | 0       | 0.17167 |
| 0.26329 | 0.32473 | 0.33333 | 0.37913 | 0.33296 | 0.35275 |
| 0.33206 | 0.39094 | 0.5     | 0.46384 | 0.54335 | 0.5     |
| 0.58844 | 0.4741  | 0.48239 | 0.5     | 0.52723 | 0.5     |
| 0.5     | 0.39375 | 0.342   | 0.5     | 0.5     | 0.43393 |
| 0.43385 | 0       | 0       | 0       | 0       | 0       |
| 0       | 0       | 0       | 0       | 0       | 0       |
| 0.33333 | 0.39095 | 0.29092 | 0.33164 | 0.36787 | 0.33333 |
| 0.35004 | 0.25441 | 0.43001 | 0.46359 | 0.44274 | 0.44421 |
| 0.5     | 0.5     | 0.54868 | 0.5     | 0.53689 | 0.44798 |
| 0.82303 | 0.4424  | 0.56223 | 0.5514  | 0.51214 | 0.37722 |
| 0.5     | 0.5     | 0       | 0       | 0       | 0       |
| 0       | 0       | 0       | 0       | 0       | 0       |
| 0       | 0.33333 | 0.2698  | 0.33791 | 0.37564 | 0.34291 |
| 0.38965 | 0.22085 | 0.30768 | 0.42064 | 0.4628  | 0.59469 |
| 0.5     | 0.28723 | 0.54917 | 0.5     | 0.59816 | 0.45747 |
| 0.59848 | 0.55094 | 0.61431 | 0.53735 | 0.45631 | 0.5     |
| 0.43532 | 0.42292 | 0       | 0       | 0       | 0       |
| 0       | 0       | 0       | 0       | 0       | 0       |
| 0       | 0       | 0.34602 | 0.37614 | 0.33498 | 0.26036 |
| 0.30202 | 0.32677 | 0.51616 | 0.5     | 0.5     | 0.427   |
| 0.50625 | 0.55696 | 0.38873 | 0.5     | 0.65813 | 0.5     |
| 0.48806 | 0.49718 | 0.5     | 0.5     | 0.69388 | 0.58928 |
| 0.4662  | 0.47887 | 0       | 0       | 0       | 0       |
| 0       | 0       | 0       | 0       | 0       | 0       |
| 0       | 0       | 0       | 0.34251 | 0.38419 | 0.33333 |
| 0.49221 | 0.5     | 0.43673 | 0.44525 | 0.45371 | 0.49256 |
| 0.50246 | 0.52065 | 0.44926 | 0.42026 | 0.5     | 0.568   |
| 0.42408 | 0.48947 | 0.50869 | 0.5     | 0.55119 | 0.44186 |
| 0.5904  | 0.50007 | 0       | 0       | 0       | 0       |
| 0       | 0       | 0       | 0       | 0       | 0       |
| 0       | 0       | 0       | 0       | 0.5     | 0.58964 |
| 0.39274 | 0.58759 | 0.40882 | 0.5     | 0.5     | 0.44953 |
| 0.54141 | 0.50071 | 0.51836 | 0.53847 | 0.48417 | 0.49682 |
| 0.49749 | 0.5     | 0.44972 | 0.52309 | 0.48116 | 0.68176 |
| 0.42313 | 0.50608 | 0.5     | 0       | 0       | 0       |
| 0       | 0       | 0       | 0       | 0       | 0       |
| 0       | 0       | 0       | 0       | 0.43324 | 0.46425 |
| 0.46818 | 0.49221 | 0.46321 | 0.5     | 0.50749 | 0.5     |
| 0.47845 | 0.52718 | 0.51542 | 0.5     | 0.46143 | 0.39548 |
| 0.56191 | 0.564   | 0.61531 | 0.5     | 0.55162 | 0.5     |
| 0.5     | 0       | 0       | 0       | 0       | 0       |
| 0       | 0       | 0       | 0       | 0       | 0       |
| 0       | 0       | 0       | 0       | 0       | 0.4913  |
| 0.5     | 0.45369 | 0.55149 | 0.44925 | 0.59919 | 0.51311 |
| 0.45663 | 0.5     | 0.50362 | 0.51964 | 0.60075 | 0.54326 |
| 0.5     | 0.45672 | 0.44566 | 0.5     | 0.53702 | 0.47571 |
| 0       | 0       | 0       | 0       | 0       | 0       |



|         |         |         |         |         |         |     |
|---------|---------|---------|---------|---------|---------|-----|
| 0       | 0       | 0       | 0       | 0       | 0       | 0   |
| 0       |         |         |         |         |         |     |
| gtSp=0  | 0       | 0       | 0       | 0       | 0       | 0   |
| 0       | 0       | 0       | 0       | 0       | 0       | 0   |
| 0       | 0       | 0       | 0       | 0       | 0       | 0   |
| 0       | 0       | 0.5     | 0.35539 | 0.42556 | 0.44371 |     |
| 0       | 0       | 0       | 0       | 0       | 0       |     |
| 0       | 0       | 0       | 0       | 0       | 0       |     |
| 0       | 0       | 0       | 1       | 0.58921 | 0.44554 |     |
| 0.55004 | 0.44356 | 0.5     | 0.50341 | 0       | 0       | 0   |
| 0       | 0       | 0       | 0       | 0       | 0       |     |
| 0       | 0       | 0       | 0       | 0       | 0       |     |
| 0       | 1       | 1       | 0.46753 | 0.65192 | 0.50471 |     |
| 0.51767 | 0.60108 | 0.65862 | 0.46207 | 0.55761 |         | 0   |
| 0       | 0       | 0       | 0       | 0       | 0       |     |
| 0       | 0       | 0       | 0       | 0       | 0       |     |
| 0       | 0       | 1       | 1       | 1       | 0.52876 |     |
| 0.44208 | 0.54041 | 0.5981  | 0.39597 | 0.5     | 0.47437 |     |
| 0.55724 | 0.5     | 0       | 0       | 0       | 0       | 0   |
| 0       | 0       | 0       | 0       | 0       | 0       |     |
| 0       | 0       | 0       | 0       | 0       | 0       |     |
| 1       | 1       | 1       | 1       | 0.5     | 0.5     |     |
| 0.50905 | 0.48464 | 0.5884  | 0.5     | 0.48064 |         | 0.5 |
| 0.55381 | 0.52437 | 0       | 0       | 0       |         | 0   |
| 0       | 0       | 0       | 0       | 0       | 0       |     |
| 0       | 0       | 0       | 0       | 0       | 0       |     |
| 1       | 1       | 1       | 1       | 1       | 1       |     |
| 0.5     | 0.47899 | 0.44576 | 0.49883 | 0.48529 | 0.5     |     |
| 0.48703 | 0.5     | 0.50785 | 0.56215 | 0       | 0       | 0   |
| 0       | 0       | 0       | 0       | 0       | 0       |     |
| 0       | 0       | 0       | 0       | 0       | 0       |     |
| 0       | 0       | 0       | 1       | 1       | 1       |     |
| 1       | 1       | 1       | 0.46238 | 0.544   | 0.49232 |     |
| 0.5     | 0.4325  | 0.5     | 0.45079 | 0.27344 | 0.45217 |     |
| 0.55094 | 0.5     | 0       | 0       | 0       | 0       | 0   |
| 0       | 0       | 0       | 0       | 0       | 0       |     |
| 0       | 0       | 0       | 0       | 0       | 0       |     |
| 0       | 1       | 1       | 1       | 1       | 1       |     |
| 1       | 1       | 0.5     | 0.49951 | 0.49871 | 0.44554 |     |
| 0.48574 | 0.5     | 0.41888 | 0.5     | 0.54637 | 0.54615 |     |
| 0.53466 | 0       | 0       | 0       | 0       | 0       | 0   |
| 0       | 0       | 0       | 0       | 0       | 0       |     |
| 0       | 0       | 0       | 0       | 0       | 0       |     |
| 0       | 1       | 1       | 1       | 1       | 1       |     |
| 1       | 1       | 0.52854 | 0.53734 | 0.5     | 0.5     |     |
| 0.41264 | 0.45182 | 0.43282 | 0.47821 | 0.5591  | 0.64855 |     |
| 0.44695 | 0       | 0       | 0       | 0       | 0       | 0   |
| 0       | 0       | 0       | 0       | 0       | 0       |     |
| 0       | 0       | 0       | 0       | 0       | 0       |     |
| 0       | 0       | 1       | 1       | 1       | 1       |     |
| 1       | 1       | 1       | 0.66794 | 0.48782 | 0.50148 |     |
| 0.5     | 0.52245 | 0.54992 | 0.52997 | 0.52013 | 0.50538 |     |

|         |         |         |         |         |         |     |
|---------|---------|---------|---------|---------|---------|-----|
| 0.44388 | 0.4793  | 0.5     | 0       | 0       | 0       | 0   |
| 0       | 0       | 0       | 0       | 0       | 0       | 0   |
| 0       | 0       | 0       | 0       | 0       | 0       | 0   |
| 0       | 0       | 0       | 1       | 1       | 1       | 1   |
| 1       | 1       | 1       | 1       | 0.3837  | 0.39185 |     |
| 0.35745 | 0.51788 | 0.5     | 0.5     | 0.46871 |         | 0.5 |
| 0.48019 | 0.44798 | 0.48817 | 0.60546 | 0       |         | 0   |
| 0       | 0       | 0       | 0       | 0       | 0       | 0   |
| 0       | 0       | 0       | 0       | 0       | 0       | 0   |
| 0       | 0       | 0       | 0       | 1       | 1       | 1   |
| 1       | 1       | 1       | 1       | 1       | 1       | 1   |
| 1       | 0.49719 | 0.45075 | 0.4855  | 0.47892 | 0.40308 |     |
| 0.5     | 0.53911 | 0.65507 | 0.50713 | 0.44157 | 0.42504 |     |
| 0       | 0       | 0       | 0       | 0       | 0       | 0   |
| 0       | 0       | 0       | 0       | 0       | 0       | 0   |
| 0       | 0       | 0       | 0       | 0       | 0       | 0   |
| 1       | 1       | 1       | 1       | 1       | 1       | 1   |
| 1       | 1       | 1       | 0.47504 | 0.5     | 0.33333 |     |
| 0.32395 | 0.3835  | 0.33333 | 0.34259 | 0.33333 | 0.35352 |     |
| 0.3521  | 0.33457 | 0       | 0       | 0       | 0       | 0   |
| 0       | 0       | 0       | 0       | 0       | 0       | 0   |
| 0       | 0       | 0       | 0       | 0       | 0       | 0   |
| 0       | 0       | 1       | 1       | 1       | 1       | 1   |
| 1       | 1       | 1       | 1       | 1       | 0.52361 |     |
| 0.3844  | 0.3351  | 0.32121 | 0.37518 | 0.33999 | 0.30611 |     |
| 0.3826  | 0.35228 | 0.33731 | 0.34398 | 0       | 0       | 0   |
| 0       | 0       | 0       | 0       | 0       | 0       | 0   |
| 0       | 0       | 0       | 0       | 0       | 0       | 0   |
| 0       | 0       | 0       | 0       | 1       | 1       | 1   |
| 1       | 1       | 1       | 1       | 1       | 0.41709 |     |
| 0.4471  | 0.5     | 0.34739 | 0.3757  | 0.38603 | 0.26507 |     |
| 0.32466 | 0.35601 | 0.32749 | 0.30747 | 0.34696 | 0.28361 |     |
| 0       | 0       | 0       | 0       | 0       | 0       | 0   |
| 0       | 0       | 0       | 0       | 0       | 0       | 0   |
| 0       | 0       | 0       | 0       | 0       | 0       | 0   |
| 1       | 1       | 1       | 1       | 1       | 1       | 1   |
| 0.48552 | 0.52587 | 0.46391 | 0.50949 | 0.50365 | 0.30446 |     |
| 0.31064 | 0.37013 | 0.32981 | 0.3143  | 0.35847 | 0.38464 |     |
| 0.27408 | 0.37679 | 0       | 0       | 0       | 0       | 0   |
| 0       | 0       | 0       | 0       | 0       | 0       | 0   |
| 0       | 0       | 0       | 0       | 0       | 0       | 0   |
| 0       | 0       | 1       | 1       | 1       | 1       | 1   |
| 1       | 0.64356 | 0.5     | 0.34583 | 0.47502 | 0.59334 |     |
| 0.54118 | 0.35456 | 0.21908 | 0.35323 | 0.35308 | 0.33333 |     |
| 0.33333 | 0.31623 | 0.33327 | 0.36755 | 0       | 0       | 0   |
| 0       | 0       | 0       | 0       | 0       | 0       | 0   |
| 0       | 0       | 0       | 0       | 0       | 0       | 0   |
| 0       | 0       | 0       | 0       | 1       | 1       | 1   |
| 1       | 0.38275 | 0.51934 | 0.47589 | 0.41057 | 0.5     |     |
| 0.50314 | 0.46225 | 0.5     | 0.28012 | 0.31702 | 0.36269 |     |
| 0.35018 | 0.33949 | 0.23716 | 0.35264 | 0.27657 | 0.34068 |     |
| 0       | 0       | 0       | 0       | 0       | 0       | 0   |







|   |   |   |   |   |   |   |
|---|---|---|---|---|---|---|
| 0 | 0 | 0 | 0 | 0 | 0 | 0 |
| 0 | 0 | 0 | 0 | 0 | 0 | 0 |
| 0 | 0 | 0 | 0 | 0 | 0 | 0 |
| 0 | 0 | 0 | 0 | 0 | 0 | 0 |
| 0 | 0 | 0 | 0 | 0 | 0 | 0 |
| 0 | 0 | 0 | 0 | 0 | 0 | 0 |

gtTCf=

0  
0.11925  
0.14534  
0.13574  
0.11593  
0.096197  
0.079948  
0.067704  
0.058926  
0.052819  
0.048646  
0.045817  
0.043898  
0.042582  
0.041662  
0.040998  
0.040498  
0.040102

gtTCs=

0  
0.1431  
0.20732  
0.22864  
0.22778  
0.21648  
0.20118  
0.18528  
0.17042  
0.1573  
0.14609  
0.13672  
0.12898  
0.12264  
0.11746  
0.11324  
0.10979  
0.10696

gtTCp=

0  
2.385  
1.5979  
1.1196



016,0.00036041,2.2204e-016,0.0040226,0.0015042,2.2204e-  
016,0.00016226,0.00068178,2.2204e-016,3.6901e-005,8.8054e-  
005,0.00035219,0.00016842,0.00036549,2.2204e-016,2.2204e-016,4.027e-  
005,2.2204e-016,0.00074908,2.2204e-016,0.00011357,2.2204e-016,2.2204e-  
016,0.0042963,2.2204e-016,0.0069291,2.2204e-016,2.2204e-016,2.2204e-  
016,0.0024482,2.2204e-016,2.2204e-016,2.2204e-016,0.0016274,2.2204e-  
016,2.2204e-016,0.0025608,2.2204e-016,4.1568e-005,2.2204e-016,2.2204e-  
016,0.00025326,0.00047311,2.2204e-016,2.2204e-016,2.2204e-016,5.816e-  
005,2.2204e-016,0.00027923,2.2204e-016,2.2204e-  
016,0.00034846,0.00013613,0.00067005,3.7251e-005,0.00046313,2.2204e-  
016,2.2204e-  
016,0.0091897,0.0062153,0.0068384,0.0043153,0.0032636,2.2204e-  
016,0.0036518,2.2204e-016,2.2204e-016,0.0027795,0.0032941,2.2204e-  
016,2.2204e-016,0.00042966,2.2204e-016,2.2204e-016,2.2204e-  
016,0.0032413,0.00033919,2.2204e-016,2.2204e-016,0.00015849,2.2204e-  
016,0.001416,2.2204e-016,2.2204e-016,0.00056288,2.2204e-016,2.2204e-  
016,8.521e-005,0.00029092,0.0008708,2.2204e-  
016,0.00065175,0.000211,0.00037666,0.00042584,2.2204e-  
016,0.0091055,0.0018725,2.2204e-016,0.00021177,0.0057699,2.2204e-  
016,2.2204e-016,2.2204e-016,2.2204e-016,0.0015806,2.2204e-  
016,0.0099107,2.2204e-016,2.2204e-016,0.0016368,2.2204e-016,2.2204e-  
016,2.2204e-016,2.2204e-016,0.00085741,2.2204e-  
016,0.00038466,0.00057305,2.2204e-016,0.00042391,2.2204e-  
016,0.00017185,5.813e-005,0.00059527,0.00037902,2.2204e-016,2.2204e-  
016,2.2204e-016,0.00058305,6.743e-005,0.00012464,2.2204e-  
016,0.0016702,2.2204e-016,2.2204e-016,2.2204e-016,2.2204e-016,2.2204e-  
016,0.0057621,0.00047919,2.6464e-005,2.2204e-016,2.2204e-016,2.2204e-  
016,0.0029559,2.2204e-016,2.2204e-  
016,0.0036028,0.00029814,0.0027685,1.8938e-005,2.2204e-016,2.2204e-  
016,2.2204e-016,0.00010806,2.2015e-005,0.0001605,2.2204e-016,2.2204e-  
016,2.2204e-016,2.2204e-016,2.2204e-016,2.2204e-016,2.2204e-  
016,2.2204e-016,2.2204e-016,0.00055621,2.2204e-016,0.0035032,2.2204e-  
016,0.002168,0.0023125,0.00058323,2.2204e-016,2.2204e-  
016,0.0069888,0.00051003,0.0072517,0.00053282,0.0018519,0.0005705,2.22  
04e-016,2.2204e-016,0.0033486,9.6777e-005,2.2204e-  
016,0.0010511,0.0005168,0.00047529,2.2204e-016,2.2204e-016,2.2204e-  
016,3.415e-005,5.4655e-005,0.00065181,2.2204e-016,2.2204e-  
016,0.0003603,0.00055982,0.00013869,0.000185,0.00028388,2.2204e-  
016,2.2204e-016,2.2204e-016,2.2204e-016,0.0013063,2.2204e-016,2.2204e-  
016,0.0087699,0.0062071,0.012091,2.2204e-016,2.2204e-  
016,0.0038082,0.0043899,2.2204e-016,0.00018811,2.2204e-016,2.2204e-  
016,2.2204e-016,2.2204e-016,2.2204e-016,2.2204e-016,0.0027441,2.2204e-  
016,4.6282e-006,0.0011451,5.697e-  
005,0.00042475,0.00017713,0.00078221,0.00011821,2.2204e-016,2.2204e-  
016,0.00097848,0.00081205,2.2204e-016,2.2204e-  
016,0.00026678,0.00057812,2.2204e-016,2.2204e-016,2.2204e-  
016,0.010451,0.0014684,0.0017184,2.2204e-016,2.2204e-016,2.2204e-  
016,2.2204e-016,0.0017825,2.2204e-016,2.2204e-016,2.2204e-016,2.2204e-  
016,0.00075695,2.2204e-016,0.0029697,2.2204e-016,2.2204e-  
016,0.00076171,0.000647,0.00085599,2.2204e-016,2.2204e-016,2.2204e-  
016,2.2204e-016,0.00013031,0.0010303,2.2204e-016,0.00010056,2.2204e-  
016,2.2204e-016,0.00043934,0.00031295,2.2204e-016,2.2204e-

016,0.00045183,0.00069021,0.00062799,0.00069212,0.0026859,2.2204e-  
016,0.0085091,0.005301,0.002156,2.2204e-016,0.0086363,2.2204e-  
016,2.2204e-016,0.0025414,2.2204e-016,0.00089585,2.2204e-016,2.2204e-  
016,2.2204e-016,2.2204e-016,2.2204e-016,2.2204e-016,2.2204e-  
016,2.2204e-016,2.2204e-016,0.00099357,0.00019541,0.00024954,2.2204e-  
016,2.2204e-016,0.00051169,2.2204e-016,2.2204e-016,2.2204e-  
016,2.2204e-016,2.2204e-016,0.0005917,0.00020643,2.2204e-  
016,0.00032727,0.0003192,2.2204e-016,2.2204e-016,2.2204e-016,2.2204e-  
016,2.2204e-016,0.0019393,2.2204e-  
016,0.0002662,0.0004624,0.0042571,0.0032986,2.2204e-  
016,0.00020066,2.2204e-016,2.2204e-016,2.2204e-016,2.2204e-  
016,2.2204e-016,2.2204e-  
016,0.0013438,0.00094165,0.00070461,0.00049562,0.00031263,0.00042579,0  
.00029459,0.00033601,2.2204e-016,2.2204e-016,1.1834e-  
005,0.00022872,2.2204e-016,0.00018021,2.2204e-016,2.2204e-016,2.2204e-  
016,0.00026114,2.2204e-016,2.2204e-016,2.2204e-016,2.2204e-  
016,0.0058367,0.0026791,0.010569,0.0031542,0.0024274,0.00014652,2.2204  
e-016,2.2204e-016,2.2204e-016,0.0028238,2.2204e-016,2.2204e-  
016,2.2204e-016,0.00079061,0.0025239,0.0017253,2.2204e-016,2.2204e-  
016,2.0308e-006,2.2204e-016,0.0014053,0.00022069,2.2204e-  
016,0.00023184,2.2204e-016,0.00030717,2.5798e-005,8.5391e-  
005,0.00048616,0.00021921,2.2204e-016,2.2204e-016,0.00032932,2.2204e-  
016,0.00026715,2.2204e-016,2.2204e-016,1.488e-005,2.2204e-016,2.2204e-  
016,2.2204e-016,0.0016782,0.0021172,2.2204e-  
016,0.0022691,0.00089428,2.2204e-016,0.00018914,0.0014531,2.2204e-  
016,2.2204e-016,2.2204e-016,2.2204e-016,2.2204e-016,2.2204e-  
016,0.00020514,0.00015851,0.00087695,2.2204e-016,6.2527e-005,2.2204e-  
016,2.2204e-016,0.00021032,0.00031221,2.2204e-016,2.2204e-  
016,0.00045351,0.00060481,2.2204e-016,0.00040122,4.3424e-  
005,0.00021909,0.00018247,2.2204e-016,0.00096499,2.2204e-016,2.2204e-  
016,2.2204e-016,2.2204e-016,0.00050941,0.0028604,2.2204e-  
016,0.003208,0.0031433,0.00067544,2.2204e-016,0.00095526,2.2204e-  
016,0.0016211,0.00048894,2.2204e-016,2.2204e-016,0.00055341,2.2204e-  
016,2.2204e-016,0.00024719,2.2204e-016,0.00016613,2.2204e-  
016,0.00024033,2.2204e-  
016,0.00057127,0.00040566,0.00049277,0.00027731,0.00025671,0.0002584,2  
.2204e-016,2.2204e-016,3.0781e-  
005,0.00041362,0.0002783,0.00097409,2.2204e-016,2.2204e-  
016,0.0024489,2.2204e-016,2.2204e-016,2.2204e-016,2.2204e-  
016,0.00124,2.2204e-016,2.2204e-016,2.2204e-016,0.0014585,2.2204e-  
016,2.2204e-016,0.002152,2.2204e-016,2.2204e-016,2.2204e-016,2.2204e-  
016,0.00048595,8.6403e-005,0.0002238,2.2204e-  
016,0.00046999,0.00020585,0.001113,2.2204e-016,2.2204e-016,2.2204e-  
016,2.2204e-016,2.2204e-016,2.2204e-016,2.2204e-016,2.2204e-  
016,2.2204e-016,8.7996e-005,2.2204e-016,0.0024146,2.2204e-  
016,0.0027861,0.0014037,1.58e-005,0.0038328,2.2204e-016,2.2204e-  
016,6.8915e-005,2.2204e-016,2.2204e-016,2.2204e-016,0.0023606,2.2204e-  
016,2.2204e-016,0.002226,2.2204e-016,5.4483e-  
005,0.0001633,0.00021663,2.2204e-016,2.2204e-016,2.2204e-  
016,0.00022879,2.2204e-016,2.2204e-016,2.2204e-  
016,0.00015773,0.00082992,0.00026488,2.2204e-016,2.2204e-  
016,0.00023272,2.2204e-016,2.2204e-016,2.2204e-016,2.2204e-

016, 2.2204e-016, 2.2204e-016, 0.0024368, 0.0040304, 2.2204e-016, 2.2204e-016, 0.0037022, 0.00010991, 0.00021769, 2.2204e-016, 0.00053238, 2.2204e-016, 0.0018691, 0.0019935, 2.2204e-016, 2.2204e-016, 0.00030062, 0.00045527, 0.00040539, 2.2204e-016, 2.2204e-016, 7.5796e-005, 2.2204e-016, 2.2204e-016, 0.00036053, 2.2204e-016, 2.2204e-016, 2.2204e-016, 2.2204e-016, 0.00057691, 2.2204e-016, 2.2204e-016, 0.00027745, 2.2204e-016, 2.2204e-016, 2.2204e-016, 0.00023451, 0.0015036, 2.2204e-016, 0.00018314, 2.2204e-016, 0.0011074, 0.0030761, 0.0043912, 2.2204e-016, 0.0018498, 0.0016903, 0.0024303, 0.0011191, 0.0010169, 0.00068381, 2.2204e-016, 0.00014654, 2.7179e-006, 0.00056236, 4.6441e-005, 0.00038017, 2.2204e-016, 0.00024517, 0.00037605, 3.4475e-005, 0.00046638, 2.2204e-016, 2.2204e-016, 2.2204e-016, 2.2204e-016, 016, 2.2204e-016, 0.00034136, 0.00021089, 2.2204e-016, 2.2204e-016, 0.00011321, 2.2204e-016, 2.2204e-016, 0.0040237, 2.2204e-016, 2.2204e-016, 2.2204e-016, 2.2204e-016, 0.003786, 0.00043917, 0.00036002, 2.2204e-016, 7.2304e-005, 2.2204e-016, 2.2204e-016, 0.0008792, 0.00055729, 2.2204e-016, 2.2204e-016, 2.2204e-016, 2.2204e-016, 2.2204e-016, 0.00048973, 2.2204e-016, 2.2204e-016, 3.404e-005, 2.2204e-016, 0.0004163, 2.2204e-016, 8.8754e-005, 0.0001287, 2.2204e-016, 2.2204e-016, 5.8886e-005, 0.00031872, 0.00041186, 2.2204e-016, 2.2204e-016, 4.079e-006, 0.00070603, 2.2204e-016, 0.0033597, 0.0026468, 2.2204e-016, 2.2204e-016, 2.2204e-016, 0.0027335, 2.2204e-016, 0.00035683, 2.2204e-016, 0.00029036, 2.2204e-016, 2.2204e-016, 0.00068161, 2.2204e-016, 0.00094145, 2.2204e-016, 2.2204e-016, 2.2204e-016, 2.2204e-016, 2.2204e-016, 2.2204e-016, 2.2204e-016, 0.00041155, 2.2204e-016, 1.8636e-005, 2.2204e-016, 0.00034458, 0.00013323, 2.2204e-016, 2.2204e-016, 2.2204e-016, 0.00011958, 0.00012576, 2.2204e-016, 2.2204e-016, 0.0001105, 7.5483e-005, 0.004127, 2.2204e-016, 2.2204e-016, 2.2204e-016, 0.0047699, 2.2204e-016, 2.2204e-016, 0.00040913, 2.2204e-016, 2.2204e-016, 0.00076199, 2.2204e-016, 2.2204e-016, 0.00014855, 0.00027966, 7.5484e-005, 2.2204e-016, 2.2204e-016, 0.00023325, 2.2204e-016, 0.00016417, 2.2204e-016, 5.6286e-007, 2.2204e-016, 0.0002421, 2.2204e-016, 2.2204e-016, 6.2284e-006, 2.2204e-016, 2.2204e-016, 2.2204e-016, 0.00017567, 0.00073313, 2.2204e-016, 0.00037508, 0.0006148, 0.00040777, 2.2204e-016, 2.2204e-016, 0.0052258, 2.2204e-016, 2.2204e-016, 0.00020063, 0.00021247, 2.2204e-016, 2.2204e-016, 2.2204e-016, 5.2675e-005, 2.2204e-016, 0.00037493, 2.2204e-016, 2.2204e-016, 2.2204e-016, 2.2204e-016, 2.2204e-016, 0.00035227, 2.2204e-016, 2.2204e-016, 2.2204e-016, 2.2204e-016, 2.2204e-016, 2.2204e-016, 0.00037646, 0.00033262, 2.2204e-016, 0.00033738, 0.00030412, 0.00025227, 8.805e-005, 2.2204e-016, 0.0004879, 0.0004524, 0.00056666, 2.2204e-016, 0.000307, 7.3218e-005, 0.00068631, 0.00017288, 0.00023857, 0.00042078, 2.2204e-016, 2.2204e-016, 2.2204e-016, 2.2204e-016, 0.00012435, 2.2204e-016, 2.2204e-016, 2.2204e-016, 2.2204e-016, 2.2204e-016, 0.00025317, 2.2204e-016, 2.2204e-016, 0.000396, 0.0001525, 0.00013115, 0.0001669, 9.2136e-005, 2.2204e-016, 0.00014339, 0.00010741, 1.4027e-005, 2.2204e-016, 0.00043114, 2.2204e-016, 2.2204e-016, 2.2204e-016, 2.2204e-016, 2.2204e-016, 0.00048874, 2.2204e-016, 2.2204e-016, 0.00043323, 2.2204e-016, 0.00052, 2.2204e-016, 0.00018993, 0.00032542, 0.0012307, 2.2204e-016, 2.2204e-016, 2.2204e-016, 0.00023121, 0.00088968, 2.2204e-016, 2.2204e-016, 0.00016001, 0.0001641, 1.8053e-005, 0.00025602, 2.2204e-016, 2.2204e-

016,1.8214e-005,0.00077506,2.2204e-016,0.00053836,0.00012047,2.2204e-016,7.527e-005,2.2204e-016,2.2204e-016,2.2204e-016,5.4478e-005,2.2204e-016,2.2204e-016,2.2204e-016,2.2204e-016,2.2204e-016,0.00024049,0.00048807,0.00067744,5.6779e-005,2.2204e-016,2.2204e-016,2.2204e-016,8.8608e-005,2.2204e-016,2.2204e-016,2.2204e-016,0.00045726,4.7902e-005,5.5002e-005,0.00047988,2.2204e-016,2.2204e-016,0.00034643,2.2204e-016,2.2204e-016,2.2204e-016,0.00049934,0.00047976,2.2204e-016,2.2204e-016,0.00020648,0.00040476,0.00018533,2.2204e-016,2.2204e-016,2.2204e-016,0.00018619,2.2204e-016,0.00023046,0.00042908,0.00025786,2.2204e-016,1.0294e-005,0.00036692,2.2204e-016,2.2204e-016,2.2204e-016,0.0003494,2.2204e-016,0.0010035,2.2204e-016,2.2204e-016,2.2204e-016,0.00024124,2.2204e-016,0.00011761,3.373e-005,7.0961e-005,2.2204e-016,2.2204e-016,2.2204e-016,2.2204e-016,0.00048719,0.0001078,2.2204e-016,2.2204e-016,2.2204e-016,2.2204e-016,0.00012242,2.2204e-016,0.00022403,2.2204e-016,0.00017432,0.00066449,0.0001002,2.2204e-016,6.9782e-005,0.00016568,4.4988e-005,2.2204e-016,5.2805e-005,0.00074416,2.2204e-016,2.2204e-016,0.0010616,8.4368e-005,2.2204e-016,0.00011858,0.00030167,4.9899e-005,6.3057e-005,0.00018374,0.00011961,6.1694e-006,2.2204e-016,2.2204e-016,2.2204e-016,2.2204e-016,2.2204e-016,2.2204e-016,0.0003143,2.2204e-016,2.2204e-016,0.00019234,2.2204e-016,0.00076093,0.00043969,2.2204e-016,0.00021389,2.2204e-016,0.00044587,2.2204e-016,2.2204e-016,0.00018143,0.00031653,2.2204e-016,2.2204e-016,2.2204e-016,0.0005127,6.9899e-005,1.885e-005,2.2204e-016,2.2204e-016,0.0002105,0.00044979,0.00037448,2.2204e-016,0.00047847,5.2838e-005,7.2112e-005,0.00028233,0.00041486,0.00023321,2.2204e-016,0.00043695,0.00022839,0.0001155,0.00020039,2.2204e-016,0.00043012,2.0544e-005,2.2204e-016,2.2204e-016,2.2204e-016,2.2204e-016,2.2204e-016,0.00068794,2.2204e-016,2.2204e-016,0.00030062,2.2204e-016,2.2204e-016,2.2204e-016,2.2204e-016,2.2204e-016,0.00046768,0.00013195,2.2204e-016,0.00074775,2.2204e-016,2.2204e-016,0.00022911,2.2204e-016,0.00024954,2.2204e-016,2.2204e-016,0.00020708,2.2204e-016,3.6e-005,0.00050773,0.00044622,0.00051512,0.00023768,2.2204e-016,0.00014973,2.2204e-016,0.00042626,2.2204e-016,0.00038698,0.00019526,2.2204e-016,2.2204e-016,0.0002787,0.00023767,2.2204e-016,2.2204e-016,0.00033728,0.00048306,0.00050184,0.00010716,0.00023308,2.2204e-016,2.2204e-016,2.2204e-016,0.00038818,9.795e-005,2.2204e-016,2.2204e-016,2.2204e-016,2.2204e-016,2.2204e-016,2.2204e-016,0.00039802,2.2204e-016,0.00065199,0.0005676,0.0007201,2.2204e-016,3.0461e-005,2.2204e-016,0.00090361,0.00017101,2.2204e-016,2.2204e-016,2.2204e-016,2.2204e-016,2.2204e-016,0.0005391,0.00035025,0.00043528,9.6232e-005,2.2204e-016,0.00020423,2.2204e-016,0.00031866,2.2204e-016,2.2204e-016,0.00035796,2.2204e-016,2.2204e-016,8.4788e-005,2.2204e-016,2.2204e-016,2.2204e-016,2.2204e-016,0.00010411,2.2204e-016,0.00014716  
0.14353,0.1443,0.1438,0.14257,0.14291,0.14419,0.14266,0.14225,0.14309,0.14358,0.14223,0.14373,0.14256,0.14283,0.14375,0.14209,0.14206,0.1437

,0.14308,0.14283,1.2571,0.94267,1.0965,1.1411,0.14314,0.14305,0.14301,  
0.14333,0.14342,0.14315,0.14351,0.14268,0.14274,0.14334,0.14298,0.1427  
5,0.14194,0.14314,0.14452,2.3922,1.4663,1.1323,1.3766,1.1348,1.2645,1.  
2711,0.14248,0.14244,0.14448,0.14309,0.14252,0.14323,0.14342,0.14263,0  
.14301,0.14258,0.14333,0.14389,0.14271,0.14297,0.14277,2.3752,2.3806,1  
.1883,1.5966,1.2754,1.3043,1.493,1.6164,1.1809,1.3957,0.14248,0.14214,  
0.1425,0.14244,0.14351,0.14252,0.14283,0.14337,0.1437,0.14218,0.14318,  
0.14331,0.14332,0.14269,0.14344,2.3779,2.3881,2.3792,1.3255,1.1334,1.3  
558,1.479,1.034,1.2685,1.2107,1.3924,1.2597,0.14321,0.14268,0.14211,0.  
14266,0.14305,0.14406,0.14389,0.14319,0.14317,0.14314,0.14256,0.14233,  
0.14221,0.14307,0.14389,0.14239,2.3859,2.3807,2.3922,2.3841,1.2682,1.2  
575,1.2841,1.2288,1.4647,1.2616,1.2245,1.2669,1.3855,1.3252,0.14379,0.  
1436,0.14339,0.14303,0.14252,0.14329,0.1434,0.14302,0.14334,0.1431,0.1  
4242,0.14377,0.14446,0.14297,0.14347,0.14292,2.3743,2.39,2.3827,2.3936  
,2.3823,2.3778,1.2622,1.2165,1.1422,1.2674,1.2291,1.2667,1.2366,1.2683  
,1.2812,1.4038,0.14302,0.14227,0.14366,0.14346,0.14298,0.14216,0.14344  
,0.14297,0.14381,0.14245,0.14311,0.14348,0.1425,0.14337,0.14307,0.1441  
5,0.14385,2.3863,2.3909,2.3869,2.3873,2.3816,2.3863,1.1839,1.3596,1.24  
65,1.2644,1.1091,1.2595,1.1534,0.75563,1.1571,1.381,1.2651,0.14221,0.1  
4341,0.14379,0.14253,0.14354,0.14355,0.14347,0.14313,0.14336,0.1424,0.  
14243,0.14283,0.14278,0.13204,0.12634,0.13355,0.14307,2.384,2.3905,2.3  
816,2.3903,2.3888,2.3799,2.382,1.2655,1.259,1.2613,1.1403,1.2345,1.262  
5,1.0817,1.268,1.3687,1.3663,1.3392,0.1433,0.14372,0.14368,0.14286,0.1  
4207,0.14274,0.14275,0.14297,0.1432,0.14246,0.14239,0.13074,0.12952,0.  
13367,0.12607,0.12972,0.13114,0.14291,2.3979,2.3898,2.3874,2.3888,2.38  
55,2.3809,2.3886,1.3257,1.344,1.2661,1.2694,1.0652,1.1548,1.1143,1.208  
2,1.3989,1.595,1.1478,0.14348,0.14324,0.14206,0.14336,0.14256,0.14425,  
0.14253,0.14287,0.14381,0.12859,0.1308,0.13091,0.1297,0.13491,0.12898,  
0.13206,0.13162,0.13495,0.14342,2.3769,2.3961,2.3846,2.3775,2.384,2.39  
07,2.3825,1.6389,1.2358,1.2624,1.2643,1.313,1.3852,1.3249,1.3087,1.278  
9,1.1367,1.2188,1.2609,0.14286,0.14436,0.14214,0.14381,0.14348,0.14244  
,0.13315,0.13027,0.13101,0.13208,0.13164,0.13046,0.13184,0.1315,0.1314  
6,0.13157,0.13117,0.13156,2.3779,2.3874,2.3756,2.3797,2.3763,2.3828,2.  
3777,1.0096,1.0226,0.94437,1.3043,1.2565,1.2648,1.1955,1.2611,1.2184,1  
.1507,1.2377,1.5031,0.14322,0.14314,0.14312,0.13267,0.13154,0.13215,0.  
13121,0.12824,0.13324,0.12925,0.12932,0.13097,0.13008,0.13059,0.1312,0  
.13153,0.1295,0.13208,2.3894,2.3871,2.3879,2.3849,2.3891,2.3797,2.3843  
,2.3899,2.385,1.2652,1.1531,1.2345,1.2176,1.0464,1.2598,1.3541,1.6128,  
1.2756,1.1336,1.0954,0.13313,0.12793,0.12973,0.13111,0.13066,0.13044,0  
.13135,0.13067,0.12957,0.13137,0.13075,0.13148,0.1316,0.13159,0.13085,  
0.13147,0.12964,0.12881,2.3898,2.383,2.3782,2.3915,2.3895,2.3945,2.379  
7,2.3703,2.3876,1.2129,1.262,0.88218,0.85887,0.99109,0.87912,0.90167,0  
.88281,0.92781,0.92682,0.88319,0.13115,0.13196,0.13194,0.1319,0.13172,  
0.13023,0.13125,0.12772,0.13238,0.13041,0.13413,0.13105,0.1312,0.13066  
,0.13178,0.13296,0.13194,0.1299,2.3967,2.3824,2.3858,2.3768,2.3799,2.3  
821,2.3817,2.3846,2.3832,1.3011,0.99537,0.88486,0.85607,0.97465,0.8990  
2,0.81912,0.99484,0.92535,0.89088,0.90737,0.1321,0.12714,0.13102,0.128  
87,0.13202,0.13208,0.13099,0.12779,0.13013,0.13063,0.13601,0.13092,0.1  
3113,0.12979,0.13393,0.13367,0.13176,0.13124,2.3859,2.3719,2.3984,2.39  
04,2.3857,2.3793,2.3928,1.0576,1.1331,1.2524,0.91338,0.97675,1.0029,0.  
72761,0.86192,0.92883,0.87141,0.82289,0.91251,0.76842,0.13124,0.1323,0  
.13073,0.13077,0.12956,0.12913,0.13369,0.13235,0.131,0.13058,0.13015,0

.13076,0.13176,0.13153,0.13217,0.13176,0.12839,0.13053,2.3817,2.3819,2.382,2.3819,2.3941,2.3707,1.2179,1.3089,1.1742,1.279,1.2581,0.81843,0.82896,0.96464,0.8741,0.83645,0.93982,0.99501,0.74896,0.9829,0.13483,0.13113,0.13149,0.13388,0.12942,0.1328,0.13103,0.1303,0.13037,0.13067,0.13045,0.13121,0.13304,0.13036,0.12976,0.13306,0.13268,0.13131,2.3796,2.3787,2.3883,2.3901,2.3897,1.5811,1.254,0.90337,1.1923,1.4577,1.3437,0.93245,0.62444,0.92678,0.92342,0.88246,0.88567,0.84523,0.88112,0.95979,0.131,0.13082,0.13245,0.13329,0.13003,0.13144,0.13063,0.12966,0.13399,0.13159,0.13276,0.12957,0.13006,0.13447,0.13049,0.12964,0.13165,0.12949,2.3894,2.3866,2.3815,0.98599,1.2916,1.2012,1.0519,1.2511,1.2605,1.1688,1.2515,0.76325,0.84794,0.94591,0.91903,0.89541,0.66498,0.92395,0.7533,0.89898,0.12907,0.12954,0.13159,0.1335,0.131,0.13094,0.13199,0.13163,0.12784,0.13098,0.13057,0.13184,0.13287,0.13136,0.13158,0.13169,0.13137,0.13073,2.3887,1.1399,1.2527,1.3015,1.2566,1.5638,0.97866,1.2587,1.1872,1.4986,0.88246,0.55625,0.9854,0.80601,0.96099,0.84278,0.92952,0.64089,0.87807,0.13051,0.13019,0.12946,0.13084,0.13172,0.12969,0.12949,0.13346,0.1339,0.12914,0.1318,0.13124,0.12982,0.13234,0.12931,0.13234,0.13482,0.11979,1.2412,1.2551,1.2487,1.262,1.2557,1.3258,1.1948,1.4563,1.0024,1.4319,1.0605,0.95877,0.89795,0.88336,0.71787,0.84039,0.92939,0.85742,0.6223,0.13109,0.13036,0.1324,0.13069,0.13352,0.13022,0.13113,0.13149,0.13282,0.13021,0.13135,0.12866,0.12708,0.13121,0.1308,0.12933,0.12906,0.11882,1.5116,1.2481,1.2548,1.3631,1.2832,1.2934,1.2087,1.2754,1.1952,1.2248,0.88293,1.0093,1.038,0.88006,0.96584,0.88085,0.6849,0.97175,0.12936,0.13029,0.12983,0.13017,0.1305,0.13097,0.13159,0.13146,0.13166,0.12984,0.13826,0.1298,0.13364,0.13261,0.13141,0.12781,0.13103,0.13067,0.11907,1.5252,1.2495,1.0472,1.483,1.1315,1.2549,1.2052,1.1689,1.3284,1.3406,0.88501,0.93702,0.91508,0.90008,0.90606,0.97889,1.0546,0.90741,0.12934,0.13066,0.13361,0.13013,0.12596,0.13227,0.13054,0.13305,0.13066,0.1334,0.13242,0.13381,0.13126,0.13064,0.13099,0.12942,0.12947,0.1192,0.11929,0.11924,1.1605,1.1845,1.2102,1.2935,1.5083,1.182,1.2552,1.2904,1.2508,0.82751,0.98109,0.88851,1.13,0.97818,0.80699,0.1312,0.13102,0.13129,0.13015,0.13152,0.13251,0.12776,0.13164,0.13524,0.13109,0.13112,0.13031,0.131,0.13122,0.13584,0.1331,0.13061,0.13057,0.1192,0.11912,0.11946,0.11864,1.0131,0.96503,1.5769,1.3552,1.3968,1.2885,1.2773,0.62314,1.2577,1.0447,0.63383,0.87985,0.13097,0.13167,0.12997,0.12937,0.12963,0.13076,0.13142,0.13158,0.13032,0.12853,0.13096,0.13253,0.12821,0.13146,0.13066,0.13129,0.13206,0.12983,0.13339,0.1317,0.11968,0.11979,0.11895,0.11882,0.11906,0.11983,1.4893,1.305,1.2544,1.3059,1.3619,1.6324,1.2689,1.2039,0.13147,0.13335,0.12913,0.13304,0.12867,0.13185,0.1307,0.13093,0.13206,0.13082,0.13152,0.13151,0.13092,0.13021,0.13127,0.13093,0.13029,0.13147,0.13093,0.13582,0.12908,0.1308,0.13053,0.11941,0.11933,0.11892,0.1192,0.11927,0.11937,1.2795,1.212,1.2484,1.4036,1.2564,0.11916,0.11938,0.13002,0.13001,0.12995,0.13161,0.12972,0.13103,0.13153,0.13153,0.13065,0.13161,0.13112,0.13134,0.13057,0.12861,0.13274,0.13276,0.13316,0.1318,0.13204,0.13094,0.13098,0.11905,0.1191,0.11927,0.11953,0.11987,0.11877,0.11966,0.11977,0.11943,0.11875,1.3657,1.3076,0.11881,0.11922,0.11936,0.11968,0.13057,0.13091,0.1302,0.13222,0.12943,0.13384,0.13117,0.12972,0.1302,0.13101,0.1321,0.13318,0.13216,0.13075,0.12935,0.12941,0.13179,0.13246,0.13003,0.11939,0.11983,0.11939,0.11948,0.119,0.11965,0.11945,0.11965,0.11888,0.11952,0.11902,0.11979,0.11946,0.11932,0.11971,0.1195,0.11931,0.13128,0.12993,0.13145,0.13049,0.13043,0.13076,0.13141,0.1306,0.13116,0.1329,0.12955,0.133,0.13135,0



.13274,0.13293,0.13143,0.11907,0.11931,0.11943,0.11926,0.11888,0.11977  
,0.11931,0.11888,0.1186,0.11896,0.11948,0.11899,0.1192,0.11977,0.11862  
,0.11995,0.11922,0.11934,0.11945,0.13362,0.13105,0.12909,0.12979,0.131  
09,0.13001,0.13173,0.12934,0.13117,0.12895,0.13,0.13158,0.13065,0.1191  
2,0.11924,0.12001,0.11877,0.11998,0.11924,0.11891,0.11923,0.11853,0.11  
919,0.1186,0.11908,0.11949,0.11903,0.11929,0.11873,0.11915,0.11941,0.1  
1968,0.11996,0.11927,0.13004,0.13055,0.13004,0.13082,0.13177,0.1306,0.  
13109,0.13301,0.13207,0.11931,0.11951,0.11899,0.11904,0.11957,0.119,0.  
11914,0.11891,0.11988,0.11987,0.11909,0.11864,0.11967,0.11956,0.11947,  
0.11906,0.11913,0.11895,0.11923,0.11817,0.11948,0.11927,0.11951,0.1182  
6,0.1194,0.13291,0.13075,0.13129,0.13092,0.11976,0.11863,0.12027,0.119  
62,0.11854,0.11905,0.11929,0.11859,0.11924,0.11931,0.11925,0.11901,0.1  
1917,0.11896,0.11894,0.11882,0.11958,0.11931,0.11894,0.11882,0.11879,0.  
.11851,0.11951,0.11881,0.11965,0.11893,0.1194,0.11983,0.11896,0.11884,  
0.11929,0.11943,0.11971,0.11922,0.1195,0.12014,0.11921,0.11941,0.12002  
,0.11947,0.11916,0.11935,0.11957,0.11908,0.11923,0.11944,0.11956,0.119  
34,0.11892,0.11883,0.11892,0.11911,0.11891,0.11915,0.11896,0.11923,0.1  
1877,0.11914,0.11951,0.11879,0.11977,0.11944,0.11862,0.11948,0.11915,0.  
.11979,0.11937,0.11917,0.11941,0.11965,0.1192,0.11904,0.1192,0.1201,0.  
11907,0.11917,0.11927,0.11792,0.1196,0.11986,0.11989,0.11872,0.11966,0.  
.11933,0.11947,0.11949,0.11996,0.11945,0.11917,0.11948,0.11942,0.11947  
,0.11938,0.11909,0.11967,0.11925,0.11856,0.1189,0.11844,0.11876,0.1200  
6,0.119,0.11874,0.11977,0.11924,0.11909,0.11914,0.11879,0.11917,0.1187  
4,0.11959,0.11944,0.11879,0.11997,0.1194,0.1186,0.11944,0.11896,0.1194  
4,0.11907,0.11902,0.11933,0.11907,0.1192,0.1197,0.11955,0.11973,0.1191  
3,0.11851,0.11942,0.11903,0.11981,0.11922,0.11955,0.11926,0.11882,0.11  
92,0.11966,0.11959,0.11879,0.11892,0.11973,0.11966,0.11982,0.1195,0.11  
917,0.11919,0.11861,0.11911,0.11954,0.11952,0.11938,0.11876,0.11911,0.  
11892,0.11886,0.11898,0.11927,0.11948,0.11931,0.11981,0.11983,0.11958,  
0.11896,0.11936,0.11828,0.11997,0.11925,0.11896,0.11877,0.11928,0.1193  
,0.11871,0.1189,0.11986,0.11938,0.11977,0.1195,0.11917,0.11932,0.11911  
,0.11956,0.1194,0.11912,0.11931,0.11894,0.11897,0.11943,0.11841,0.1191  
8,0.11911,0.11886,0.11898,0.11885,0.1193  
0.20782,0.2083,0.20786,0.20676,0.20749,0.20885,0.20705,0.2067,0.20671,  
0.20743,0.20625,0.20764,0.20648,0.20746,0.20779,0.20616,0.20663,0.2084  
8,0.20725,0.20771,0.89778,0.70606,0.79746,0.82698,0.20721,0.2072,0.207  
65,0.20697,0.20761,0.20727,0.20777,0.20709,0.20698,0.20758,0.20749,0.2  
0725,0.20622,0.20708,0.2085,1.6039,1.0296,0.81729,0.97277,0.82492,0.90  
444,0.90849,0.20654,0.20686,0.20884,0.2071,0.20677,0.20759,0.20765,0.2  
0687,0.20701,0.2071,0.20741,0.20808,0.20724,0.20756,0.20718,1.592,1.59  
7,0.85555,1.1062,0.90689,0.92866,1.0454,1.1217,0.8518,0.98547,0.20718,  
0.20621,0.2071,0.20674,0.20785,0.20711,0.20717,0.20756,0.20777,0.20664  
,0.20774,0.20764,0.20779,0.20709,0.20801,1.5888,1.6014,1.5955,0.93821,  
0.8212,0.95974,1.0368,0.76057,0.90605,0.87268,0.98508,0.89799,0.20764,  
0.20686,0.20647,0.20667,0.20716,0.20799,0.20807,0.20744,0.20762,0.2074  
6,0.20689,0.20649,0.20665,0.20744,0.2082,0.20686,1.6017,1.5981,1.6032,  
1.5935,0.90699,0.89758,0.91778,0.88152,1.0275,0.89881,0.88103,0.90565,  
0.97937,0.94297,0.20806,0.20778,0.2075,0.20754,0.20686,0.20744,0.20733  
,0.20721,0.20769,0.20755,0.20629,0.20768,0.20843,0.20711,0.2078,0.2069  
1,1.5853,1.6018,1.5943,1.6061,1.596,1.5954,0.90069,0.87388,0.82829,0.9  
0817,0.87718,0.9039,0.88526,0.90558,0.91239,0.99051,0.20679,0.2066,0.2  
0768,0.20782,0.2075,0.20648,0.20761,0.20705,0.20765,0.20676,0.20764,0.

2074,0.20694,0.20729,0.20746,0.20826,0.20819,1.5945,1.6067,1.5999,1.5978,1.5944,1.6002,0.85596,0.96188,0.89166,0.90271,0.80685,0.89727,0.83351,0.58833,0.83671,0.97771,0.90379,0.20633,0.20758,0.20818,0.20664,0.20792,0.20744,0.2078,0.20732,0.2072,0.20688,0.20672,0.20716,0.20717,0.17712,0.16505,0.18265,0.20765,1.5978,1.605,1.5913,1.6014,1.6036,1.5923,1.5934,0.90771,0.89917,0.90121,0.82567,0.88851,0.90366,0.78968,0.90675,0.96657,0.96622,0.94718,0.20746,0.20831,0.20798,0.20671,0.20676,0.20738,0.20736,0.20701,0.2078,0.2067,0.20698,0.17543,0.17221,0.18125,0.16295,0.17226,0.17705,0.20719,1.6146,1.6079,1.5994,1.6019,1.5994,1.5907,1.5993,0.9369,0.95254,0.90371,0.90754,0.77849,0.83397,0.81011,0.86628,0.98964,1.107,0.83182,0.20762,0.20731,0.20604,0.20755,0.20695,0.20874,0.20636,0.20725,0.20791,0.16998,0.17636,0.17521,0.17171,0.18444,0.17239,0.17728,0.17702,0.18526,0.20787,1.5885,1.6062,1.5988,1.5902,1.5952,1.6053,1.5966,1.1316,0.88566,0.89779,0.90172,0.93209,0.97894,0.93811,0.93134,0.91203,0.82439,0.87599,0.90014,0.20709,0.20843,0.20674,0.20809,0.20742,0.20672,0.18075,0.17511,0.17528,0.17854,0.17664,0.17385,0.1782,0.17843,0.17837,0.17686,0.17596,0.17708,1.5939,1.6025,1.5848,1.5877,1.5859,1.5976,1.5922,0.74552,0.75434,0.70467,0.92731,0.89659,0.90495,0.85977,0.9006,0.8749,0.83384,0.88591,1.0525,0.20756,0.20728,0.20779,0.18062,0.17699,0.17851,0.17636,0.16905,0.18339,0.17247,0.17149,0.17635,0.17386,0.17594,0.17651,0.17764,0.17121,0.17857,1.6018,1.5965,1.5983,1.5994,1.602,1.5899,1.5925,1.6012,1.6001,0.9042,0.83274,0.88489,0.87425,0.76564,0.89992,0.95807,1.1203,0.90696,0.82112,0.79925,0.18047,0.16769,0.17292,0.17787,0.1744,0.17438,0.17568,0.17596,0.17346,0.17599,0.17351,0.17665,0.17702,0.17684,0.17569,0.17677,0.17276,0.17136,1.6024,1.5967,1.5904,1.6036,1.6045,1.6074,1.5953,1.5844,1.6001,0.87155,0.90062,0.64961,0.63187,0.71669,0.64685,0.66055,0.65074,0.67668,0.67991,0.64853,0.17621,0.17614,0.17775,0.17735,0.17761,0.1724,0.17645,0.1678,0.17953,0.17264,0.18227,0.17706,0.17642,0.17469,0.1768,0.1806,0.17822,0.17441,1.6041,1.5962,1.6012,1.5891,1.5923,1.5935,1.5962,1.5962,1.5974,0.90131,0.71811,0.6509,0.63171,0.70727,0.66186,0.61002,0.72324,0.67646,0.65468,0.66571,0.18031,0.16716,0.17629,0.1706,0.17893,0.17692,0.17589,0.1677,0.17468,0.17573,0.18799,0.17548,0.17615,0.1739,0.18389,0.18123,0.17705,0.1752,1.5947,1.5831,1.6064,1.606,1.6015,1.5901,1.6096,0.74505,0.79549,0.87141,0.66899,0.70545,0.73124,0.54947,0.63639,0.67694,0.64735,0.61118,0.6712,0.57728,0.17663,0.17725,0.17497,0.17495,0.17278,0.17125,0.18206,0.1793,0.17575,0.17576,0.17433,0.17611,0.17672,0.17693,0.17934,0.17705,0.16855,0.17452,1.5966,1.593,1.5943,1.5933,1.6057,1.5855,0.84879,0.90477,0.82397,0.89139,0.87528,0.61019,0.61607,0.69944,0.64267,0.61803,0.68922,0.717,0.5645,0.71461,0.185,0.1755,0.17661,0.18269,0.17127,0.18012,0.17615,0.17522,0.17381,0.17467,0.17547,0.17629,0.18137,0.1753,0.17314,0.18096,0.18171,0.17625,1.599,1.5952,1.6024,1.6034,1.6019,1.0826,0.87147,0.64926,0.83194,1.0005,0.92941,0.6825,0.48769,0.67813,0.67461,0.6514,0.65144,0.6288,0.64953,0.70264,0.1753,0.17638,0.17724,0.18168,0.174,0.17655,0.17587,0.17114,0.18337,0.1771,0.1799,0.17169,0.17325,0.18514,0.17381,0.17265,0.17675,0.17201,1.6023,1.6001,1.5923,0.70274,0.89663,0.8409,0.74308,0.86934,0.87674,0.8176,0.87219,0.57517,0.62823,0.68844,0.67243,0.65721,0.51471,0.67495,0.56829,0.6622,0.17018,0.1708,0.17747,0.1816,0.17632,0.17615,0.17864,0.17646,0.16949,0.177,0.17366,0.17726,0.18173,0.17674,0.17758,0.17677,0.17645,0.17615,1.6036,0.80013,0.87291,0.90005,0.87424,1.0722,0.69652,0.87484,0.83145,1.0284,0.65015,0.44759,0.71276,0.60093,0.69933,0.62539,0.68009,0.49864,0.6481,0.17571,

0.17544,0.17173,0.17632,0.177,0.17304,0.17239,0.18218,0.18313,0.17075,  
0.177,0.17657,0.17264,0.17881,0.17088,0.18033,0.186,0.14606,0.86571,0.  
87311,0.8677,0.8751,0.87584,0.91928,0.83487,1.0003,0.71144,0.98783,0.7  
5634,0.69597,0.66043,0.65054,0.54721,0.62438,0.68231,0.6325,0.48692,0.  
17637,0.17444,0.17911,0.17559,0.18184,0.17438,0.176,0.1767,0.17908,0.1  
7577,0.17681,0.16986,0.16634,0.17642,0.17586,0.17215,0.17168,0.14497,1  
.0352,0.86841,0.8735,0.94415,0.89211,0.89807,0.84317,0.88521,0.83442,0  
.85451,0.65099,0.73333,0.74618,0.64788,0.70644,0.65009,0.52382,0.7036,  
0.17175,0.17404,0.1726,0.17316,0.1757,0.17571,0.17863,0.17665,0.17835,  
0.17298,0.19539,0.17286,0.18069,0.17944,0.1771,0.16842,0.1762,0.17636,  
0.14521,1.0478,0.86829,0.7394,1.0191,0.79544,0.87376,0.84017,0.81893,0  
.92159,0.92908,0.65189,0.68206,0.67136,0.6619,0.66559,0.71462,0.75527,  
0.66298,0.17153,0.17448,0.18245,0.17548,0.16292,0.17915,0.17616,0.1816  
6,0.17403,0.18239,0.17944,0.18357,0.17782,0.17431,0.17598,0.17216,0.17  
209,0.14528,0.14554,0.14544,0.81433,0.82781,0.8446,0.89526,1.0344,0.82  
779,0.87488,0.89707,0.86971,0.61607,0.71766,0.65504,0.80634,0.71105,0.  
60183,0.17689,0.17617,0.1769,0.17227,0.17655,0.1803,0.16859,0.17723,0.  
18677,0.17618,0.17569,0.17561,0.17626,0.17611,0.18832,0.18175,0.17459,  
0.17491,0.14559,0.14515,0.14559,0.14512,0.71855,0.68908,1.0777,0.93704  
,0.96308,0.89462,0.88859,0.46777,0.87694,0.75486,0.49279,0.64825,0.176  
26,0.17663,0.17262,0.17241,0.1726,0.17561,0.17663,0.17748,0.17343,0.17  
107,0.17617,0.18022,0.1709,0.17648,0.17608,0.17647,0.1793,0.17247,0.18  
19,0.17675,0.14588,0.146,0.14474,0.1451,0.14543,0.14597,1.0222,0.90618  
,0.87422,0.90253,0.94236,1.1145,0.8834,0.83983,0.17658,0.18147,0.17037  
,0.18187,0.17054,0.17707,0.17585,0.17401,0.17912,0.17595,0.17736,0.177  
68,0.17539,0.17534,0.17647,0.17608,0.17382,0.17755,0.17512,0.18774,0.1  
7102,0.17612,0.1754,0.14535,0.14548,0.14499,0.14516,0.14537,0.1453,0.8  
9124,0.84739,0.86711,0.96881,0.87474,0.14517,0.14546,0.17267,0.17378,0  
.1741,0.1763,0.17355,0.17608,0.17726,0.17672,0.17495,0.17811,0.17694,0  
.17624,0.17407,0.17014,0.18047,0.18023,0.18265,0.1768,0.17943,0.17597,  
0.17636,0.14533,0.14529,0.14548,0.14558,0.14576,0.14479,0.14557,0.1458  
5,0.14571,0.14488,0.94243,0.90792,0.14508,0.14545,0.14543,0.14557,0.17  
527,0.17616,0.17346,0.17947,0.17281,0.18297,0.17668,0.17343,0.17509,0.  
17657,0.17844,0.18233,0.17886,0.17606,0.17272,0.17266,0.17686,0.17911,  
0.17428,0.14577,0.14602,0.14533,0.14614,0.1452,0.14579,0.14533,0.14557  
,0.14508,0.14568,0.14535,0.14607,0.14573,0.14552,0.14565,0.14534,0.145  
12,0.17654,0.17409,0.17631,0.17582,0.17425,0.17598,0.17783,0.17503,0.1  
7678,0.18265,0.17255,0.18038,0.17685,0.18013,0.18027,0.17636,0.14508,0  
.1455,0.1454,0.14499,0.14481,0.14569,0.14538,0.14518,0.14455,0.14503,0  
.14564,0.14486,0.1449,0.14599,0.14487,0.14619,0.14527,0.14543,0.14558,  
0.18088,0.17612,0.17129,0.17214,0.17585,0.17134,0.17762,0.17162,0.1762  
2,0.17004,0.17314,0.17756,0.17576,0.14492,0.1456,0.14601,0.14504,0.146  
26,0.14539,0.14476,0.14533,0.14468,0.1457,0.1447,0.14509,0.14551,0.145  
11,0.14528,0.14499,0.14517,0.14545,0.14571,0.14592,0.14535,0.17375,0.1  
7578,0.17357,0.17533,0.17813,0.17579,0.17611,0.18085,0.17893,0.14545,0  
.1453,0.14514,0.14505,0.14546,0.14503,0.14527,0.14503,0.14584,0.14579,  
0.14513,0.14483,0.14578,0.14579,0.14547,0.14486,0.14528,0.14514,0.1452  
2,0.14448,0.14564,0.14553,0.14583,0.14443,0.14571,0.18,0.17588,0.1764,  
0.17633,0.1459,0.14497,0.14636,0.14565,0.14489,0.14543,0.14529,0.14488  
,0.14542,0.14558,0.14523,0.14491,0.1454,0.14524,0.14495,0.14492,0.1459  
1,0.1453,0.14518,0.14518,0.14495,0.14474,0.14547,0.14501,0.14548,0.144  
98,0.14556,0.1458,0.14505,0.14494,0.14542,0.14546,0.14586,0.14554,0.14

534,0.14614,0.14542,0.14548,0.1461,0.14536,0.14516,0.14529,0.14538,0.14524,0.1449,0.14558,0.14561,0.14546,0.1452,0.14492,0.1452,0.14495,0.14503,0.14538,0.14499,0.14497,0.14508,0.14507,0.1456,0.14475,0.14567,0.14533,0.14498,0.14538,0.14514,0.14588,0.14519,0.1453,0.14562,0.14594,0.14527,0.14516,0.14547,0.14599,0.14531,0.14493,0.14514,0.14431,0.14569,0.14553,0.14605,0.1451,0.14555,0.14519,0.14543,0.1456,0.14595,0.14575,0.14541,0.14555,0.14556,0.1454,0.14531,0.14508,0.14551,0.14514,0.14452,0.14484,0.14438,0.14488,0.14629,0.14507,0.14502,0.14566,0.14507,0.14488,0.14537,0.14529,0.14545,0.14487,0.14525,0.14559,0.1451,0.14591,0.14523,0.14467,0.14537,0.14512,0.14567,0.14503,0.14509,0.14543,0.14525,0.14522,0.14555,0.14559,0.14565,0.14505,0.14442,0.14527,0.14525,0.14594,0.14536,0.14564,0.14525,0.14518,0.14519,0.14556,0.14565,0.14518,0.14478,0.14631,0.14585,0.14616,0.14546,0.14527,0.14566,0.14459,0.14493,0.14546,0.14546,0.14504,0.14513,0.14525,0.14522,0.1452,0.145,0.14553,0.14574,0.14538,0.14584,0.14629,0.1456,0.14501,0.1455,0.14432,0.14584,0.14523,0.14479,0.14483,0.14543,0.14529,0.14465,0.14493,0.14584,0.1454,0.14573,0.14575,0.14535,0.14486,0.14512,0.14556,0.14538,0.14524,0.1453,0.14456,0.14503,0.14527,0.14481,0.14531,0.14524,0.14484,0.14531,0.14494,0.14519

0.22868,0.2296,0.22889,0.22824,0.22847,0.22974,0.22838,0.22807,0.22827,0.22875,0.22753,0.22915,0.2278,0.22868,0.22908,0.22756,0.22787,0.22947,0.22856,0.22884,0.67081,0.55015,0.60452,0.62795,0.22842,0.22876,0.22904,0.22851,0.22911,0.22874,0.22897,0.22795,0.22852,0.22894,0.2287,0.22909,0.22783,0.22864,0.22984,1.1267,0.75459,0.61816,0.71971,0.62583,0.67461,0.67892,0.22774,0.22832,0.22955,0.2278,0.22762,0.22885,0.22871,0.22813,0.2282,0.22841,0.22846,0.22982,0.22835,0.22895,0.22829,1.1106,1.1179,0.64187,0.8038,0.67683,0.69,0.76796,0.81296,0.64213,0.72787,0.22813,0.22743,0.22828,0.22829,0.22925,0.2282,0.22822,0.22879,0.22911,0.22794,0.22907,0.22881,0.2291,0.22879,0.22894,1.1116,1.1208,1.1183,0.69666,0.62065,0.71094,0.75948,0.58284,0.67662,0.65573,0.72809,0.67029,0.22921,0.22782,0.22768,0.22827,0.22831,0.22902,0.22928,0.22854,0.22923,0.2286,0.22858,0.22792,0.228,0.22889,0.22974,0.22793,1.1235,1.1237,1.128,1.115,0.67828,0.67253,0.68442,0.66081,0.75502,0.67088,0.66208,0.67949,0.72202,0.7024,0.22916,0.2286,0.22869,0.22894,0.22844,0.22927,0.22901,0.22847,0.22901,0.22886,0.22796,0.22935,0.2296,0.22848,0.22941,0.22864,1.1082,1.1252,1.1118,1.1241,1.1134,1.1177,0.67384,0.65629,0.62857,0.67989,0.65719,0.6768,0.66371,0.67801,0.68092,0.73042,0.22855,0.2279,0.22892,0.22939,0.22869,0.22814,0.22878,0.22835,0.22887,0.22823,0.229,0.22882,0.22843,0.22827,0.22855,0.22968,0.22919,1.1192,1.1223,1.1229,1.1153,1.1172,1.1219,0.64668,0.71213,0.66501,0.67476,0.61345,0.66935,0.62783,0.4736,0.63131,0.72091,0.67576,0.22821,0.22879,0.22948,0.22804,0.22895,0.22888,0.22895,0.22853,0.22871,0.22826,0.22817,0.22854,0.2283,0.18299,0.16597,0.19163,0.22923,1.1178,1.1302,1.113,1.1221,1.1257,1.1126,1.1139,0.67842,0.67143,0.67191,0.62624,0.66732,0.67587,0.601,0.67979,0.71355,0.71477,0.70143,0.22867,0.22973,0.22923,0.22834,0.22786,0.22819,0.22869,0.22881,0.2294,0.22826,0.22815,0.18063,0.1759,0.18929,0.16195,0.17599,0.18321,0.2285,1.1338,1.1297,1.1205,1.1244,1.1202,1.1171,1.1193,0.6941,0.70559,0.6739,0.67813,0.59283,0.62942,0.61626,0.64934,0.73126,0.80341,0.63017,0.22867,0.22867,0.22796,0.22876,0.2283,0.23,0.22754,0.22856,0.22918,0.173,0.18271,0.18082,0.17504,0.19381,0.17695,0.18289,0.18296,0.19538,0.22934,1.1108,1.1289,1.1235,1.1118,1.1198,1.1231,1.1181,0.82105,0.66138,0.66974,0.67319,0.69399,0.72434,0.69408,0.69168,

0.68235,0.62382,0.65833,0.67392,0.22864,0.2298,0.22763,0.22939,0.22914  
,0.22793,0.1888,0.18057,0.18037,0.18529,0.18253,0.17834,0.18499,0.1857  
9,0.18526,0.18266,0.18192,0.18299,1.1143,1.119,1.1059,1.1113,1.1095,1.  
1202,1.113,0.57456,0.57942,0.54774,0.68795,0.6672,0.67411,0.64611,0.67  
531,0.65646,0.63124,0.6634,0.76992,0.22915,0.22895,0.22944,0.18908,0.1  
8327,0.18596,0.18212,0.17133,0.19332,0.17602,0.1751,0.18211,0.17837,0.  
18174,0.18259,0.18431,0.17421,0.18571,1.1198,1.1153,1.1215,1.1234,1.12  
51,1.1121,1.1146,1.1221,1.1213,0.67778,0.62637,0.66501,0.65813,0.58511  
,0.66969,0.71103,0.8131,0.67317,0.62418,0.60844,0.18807,0.16918,0.1774  
4,0.18514,0.1793,0.17942,0.18103,0.18188,0.17792,0.18189,0.17787,0.182  
64,0.18344,0.18251,0.18145,0.18268,0.1773,0.17538,1.1203,1.1205,1.116,  
1.1247,1.1242,1.1284,1.1162,1.1089,1.1186,0.6542,0.67299,0.49433,0.480  
59,0.53505,0.49142,0.50066,0.49453,0.50911,0.51629,0.49181,0.1822,0.18  
111,0.18439,0.18325,0.18457,0.17608,0.18227,0.16964,0.18704,0.17635,0.  
19042,0.1834,0.18224,0.17987,0.18265,0.18849,0.18552,0.18023,1.1217,1.  
1184,1.1191,1.1096,1.1164,1.1139,1.1174,1.1188,1.118,0.64662,0.53728,0  
.49401,0.47882,0.52973,0.50255,0.46734,0.54374,0.51029,0.49746,0.50562  
,0.18861,0.16877,0.18197,0.17393,0.18602,0.1829,0.18215,0.16926,0.1802  
5,0.18125,0.1995,0.1807,0.18198,0.1787,0.19291,0.18836,0.1832,0.18033,  
1.1186,1.1038,1.1284,1.1284,1.1258,1.1095,1.1317,0.53937,0.57586,0.627  
47,0.50688,0.52695,0.55483,0.42452,0.48396,0.50861,0.49687,0.46805,0.5  
0875,0.44422,0.18284,0.18274,0.18001,0.18019,0.17715,0.17511,0.19095,0  
.18663,0.18149,0.18161,0.17904,0.18178,0.18285,0.18281,0.18687,0.18296  
,0.1707,0.17966,1.1179,1.1157,1.1164,1.1161,1.1248,1.1053,0.61294,0.64  
876,0.59614,0.64186,0.63054,0.46791,0.46905,0.5243,0.48728,0.47351,0.5  
2353,0.53399,0.43749,0.53832,0.19473,0.18056,0.1824,0.19162,0.17433,0.  
18796,0.18194,0.18072,0.17847,0.17942,0.18142,0.18199,0.18954,0.18036,  
0.1773,0.18883,0.19093,0.18208,1.1177,1.1179,1.127,1.1227,1.1276,0.771  
53,0.62614,0.47571,0.60045,0.71459,0.66583,0.51668,0.38832,0.51349,0.5  
097,0.49594,0.49467,0.48198,0.49502,0.53158,0.18066,0.1829,0.18283,0.1  
8956,0.17908,0.18192,0.18155,0.17415,0.19258,0.18271,0.18776,0.17514,0  
.17822,0.19551,0.17788,0.1766,0.18271,0.17622,1.1241,1.1223,1.1135,0.5  
1246,0.6446,0.60868,0.54073,0.62562,0.6298,0.59089,0.6291,0.44527,0.48  
128,0.51842,0.50964,0.49917,0.40651,0.51018,0.44066,0.50377,0.17298,0.  
17382,0.18367,0.19028,0.18246,0.18209,0.18616,0.18245,0.17197,0.18313,  
0.17837,0.18363,0.19086,0.18259,0.18379,0.18247,0.1827,0.18136,1.1283,  
0.57944,0.62833,0.64649,0.63059,0.76554,0.50781,0.62984,0.60138,0.7325  
3,0.49599,0.36541,0.53486,0.46096,0.52863,0.47861,0.51495,0.39522,0.49  
481,0.18179,0.1811,0.17479,0.1822,0.18284,0.17783,0.17634,0.19098,0.19  
224,0.17397,0.18267,0.18234,0.17667,0.18564,0.17421,0.18843,0.19689,0.  
13649,0.62451,0.63086,0.62432,0.62999,0.63067,0.66103,0.60126,0.71468,  
0.51916,0.70434,0.55831,0.5222,0.50347,0.49464,0.42698,0.477,0.51809,0  
.4837,0.38779,0.18231,0.17901,0.18627,0.1814,0.19065,0.18001,0.18126,0  
.18211,0.18547,0.1815,0.18274,0.17273,0.16725,0.18189,0.18186,0.17587,  
0.17572,0.13541,0.73764,0.62482,0.63073,0.67927,0.64184,0.64331,0.6083  
8,0.63663,0.60132,0.61707,0.49494,0.55205,0.55549,0.4918,0.53627,0.495  
23,0.41089,0.52582,0.17523,0.17901,0.17656,0.17695,0.18164,0.18177,0.1  
8601,0.18238,0.18534,0.17718,0.21131,0.17701,0.18871,0.18701,0.1833,0.  
17078,0.18209,0.18233,0.13567,0.74476,0.62395,0.53804,0.72761,0.57752,  
0.62944,0.60399,0.59014,0.66212,0.66536,0.49833,0.51349,0.50988,0.5048  
3,0.50556,0.54044,0.56199,0.50052,0.17513,0.18,0.19125,0.18144,0.16203  
,0.18662,0.1819,0.19074,0.17845,0.19138,0.18705,0.19263,0.18516,0.1787

4,0.18177,0.17599,0.17553,0.13538,0.13603,0.1358,0.58748,0.59776,0.607  
44,0.64549,0.73659,0.59614,0.62775,0.64397,0.62784,0.47125,0.54252,0.4  
9951,0.59688,0.53343,0.46144,0.18351,0.18171,0.18255,0.17606,0.18275,0  
.18759,0.17147,0.18303,0.19744,0.18214,0.18105,0.18103,0.18217,0.18198  
,0.20001,0.19099,0.17939,0.18031,0.13568,0.13548,0.13562,0.13564,0.524  
76,0.50429,0.76705,0.67054,0.69008,0.64208,0.63889,0.35375,0.63112,0.5  
6731,0.39106,0.49301,0.18196,0.18235,0.17642,0.17701,0.17705,0.18132,0  
.18239,0.18433,0.17778,0.17462,0.18191,0.18872,0.17462,0.18211,0.18207  
,0.18209,0.18668,0.17685,0.19038,0.18239,0.13635,0.13632,0.1354,0.1353  
3,0.13589,0.13628,0.72861,0.65159,0.63066,0.64807,0.67295,0.79394,0.63  
625,0.60593,0.18284,0.19007,0.1728,0.19032,0.17374,0.18242,0.18166,0.1  
7841,0.18614,0.18214,0.18355,0.18496,0.18067,0.18138,0.18247,0.18178,0  
.17814,0.18407,0.18041,0.19966,0.1747,0.18253,0.1815,0.13544,0.13615,0  
.13533,0.13563,0.13572,0.13564,0.64119,0.61335,0.62376,0.69499,0.63166  
,0.13515,0.13599,0.17667,0.17852,0.17915,0.18211,0.17852,0.18214,0.183  
06,0.18254,0.18004,0.18484,0.18319,0.18206,0.179,0.17222,0.18832,0.188  
24,0.19187,0.18251,0.18704,0.18183,0.18201,0.13594,0.13557,0.13593,0.1  
355,0.13604,0.13515,0.13615,0.13611,0.13593,0.13516,0.67427,0.65418,0.  
13588,0.13599,0.13599,0.13597,0.18095,0.1822,0.17773,0.18729,0.17661,0  
.19204,0.18338,0.17779,0.1809,0.18247,0.18486,0.19154,0.18616,0.18208,  
0.17757,0.17657,0.18261,0.1858,0.17941,0.13594,0.13635,0.13565,0.13637  
,0.13552,0.13633,0.1358,0.13594,0.1353,0.13624,0.1358,0.13635,0.13598,  
0.13605,0.13606,0.13577,0.13588,0.18234,0.17892,0.18165,0.18192,0.1791  
1,0.18202,0.18478,0.18001,0.1825,0.19184,0.1766,0.18775,0.18305,0.1872  
1,0.18757,0.18216,0.13532,0.13608,0.13589,0.13574,0.13528,0.13625,0.13  
587,0.13578,0.13485,0.13563,0.13589,0.13528,0.13526,0.13614,0.13522,0.  
1364,0.13598,0.13604,0.13593,0.18803,0.18228,0.17488,0.17575,0.18127,0  
.17418,0.18395,0.17533,0.18239,0.17264,0.1778,0.18441,0.18181,0.13552,  
0.13596,0.13605,0.13531,0.13668,0.13557,0.13535,0.13596,0.1354,0.13596  
,0.13527,0.13544,0.13593,0.13569,0.13556,0.13554,0.13581,0.13566,0.135  
57,0.13633,0.13587,0.17843,0.18179,0.17786,0.18124,0.18528,0.18173,0.1  
8205,0.189,0.18618,0.13575,0.13551,0.13582,0.13569,0.13593,0.1357,0.13  
539,0.13524,0.1363,0.13614,0.13578,0.13508,0.13621,0.13617,0.13556,0.1  
3522,0.13561,0.13566,0.13567,0.13476,0.13615,0.13604,0.13616,0.13448,0  
.13637,0.18759,0.18195,0.1823,0.18203,0.13611,0.13506,0.13659,0.13576,  
0.13533,0.13593,0.13588,0.1353,0.13613,0.13573,0.13557,0.1355,0.1355,0  
.13591,0.13523,0.13553,0.13615,0.13532,0.13549,0.13551,0.13536,0.13529  
,0.13582,0.13546,0.13585,0.13557,0.13559,0.13623,0.13527,0.13534,0.135  
64,0.13574,0.13644,0.13607,0.1356,0.13656,0.13563,0.13562,0.13641,0.13  
557,0.13571,0.13577,0.13573,0.13561,0.13512,0.13581,0.13589,0.13572,0.  
13573,0.13547,0.13571,0.13533,0.1354,0.13575,0.13577,0.1355,0.13566,0.  
13568,0.13614,0.13514,0.13599,0.13576,0.13547,0.13584,0.13565,0.13634,  
0.13569,0.13566,0.13604,0.13639,0.13582,0.13565,0.13583,0.13647,0.1356  
4,0.13555,0.13557,0.13494,0.13641,0.13583,0.13611,0.13551,0.13589,0.13  
545,0.13601,0.13622,0.13639,0.13621,0.13585,0.13604,0.1359,0.13576,0.1  
3584,0.13525,0.13622,0.13571,0.13519,0.13513,0.13469,0.13541,0.13638,0  
.13536,0.13561,0.13625,0.13568,0.13554,0.13561,0.13556,0.13606,0.13535  
,0.13546,0.13615,0.13564,0.1365,0.1357,0.1353,0.13559,0.13548,0.13613,  
0.13576,0.13545,0.13565,0.13557,0.13573,0.13613,0.13604,0.13597,0.1355  
2,0.13495,0.13574,0.13592,0.13655,0.13564,0.13592,0.13542,0.13553,0.13  
548,0.13608,0.13617,0.13578,0.13512,0.13677,0.13622,0.13622,0.13597,0.  
13594,0.1362,0.13538,0.13536,0.13581,0.13575,0.13529,0.1355,0.13584,0.

13602,0.13586,0.1353,0.13586,0.1361,0.13583,0.13613,0.13664,0.13601,0.  
1356,0.13604,0.13459,0.13603,0.13552,0.13537,0.13512,0.1358,0.13555,0.  
13517,0.13535,0.13642,0.13577,0.13628,0.136,0.13563,0.13519,0.1355,0.1  
3595,0.13575,0.13568,0.13565,0.13492,0.13577,0.13547,0.13548,0.13588,0  
.13581,0.1353,0.1357,0.13535,0.13583  
0.22802,0.22844,0.22791,0.22756,0.2281,0.2289,0.22708,0.2273,0.2275,0.  
2281,0.22681,0.22834,0.22704,0.2281,0.22813,0.22701,0.22684,0.22834,0.  
22796,0.22818,0.52584,0.44562,0.48069,0.4988,0.22755,0.22788,0.22848,0  
.2274,0.22802,0.22782,0.22804,0.22712,0.22782,0.22769,0.22801,0.22832,  
0.22694,0.22796,0.22876,0.84006,0.58322,0.48687,0.55857,0.4961,0.52947  
,0.52935,0.22714,0.22745,0.22841,0.22711,0.2266,0.22822,0.22786,0.2273  
9,0.22707,0.22743,0.22781,0.22846,0.22786,0.22787,0.22729,0.82208,0.82  
477,0.50553,0.61412,0.5285,0.53923,0.59165,0.62195,0.5064,0.56498,0.22  
763,0.22657,0.22764,0.22733,0.22834,0.22755,0.22746,0.22772,0.22827,0.  
22721,0.22849,0.22783,0.2287,0.22771,0.22804,0.8226,0.82727,0.82757,0.  
54238,0.49151,0.55148,0.58607,0.46723,0.529,0.51379,0.56594,0.5249,0.2  
2797,0.22714,0.22721,0.22755,0.22742,0.22808,0.22863,0.22745,0.22853,0  
.22786,0.22773,0.22749,0.2273,0.22784,0.22869,0.22726,0.83587,0.82984,  
0.83567,0.82412,0.53138,0.52607,0.53463,0.51931,0.58377,0.52327,0.5200  
2,0.5336,0.56185,0.54937,0.2281,0.22824,0.22785,0.2281,0.22763,0.22802  
,0.22813,0.22747,0.22838,0.22805,0.22703,0.22849,0.22895,0.22769,0.227  
89,0.22726,0.81377,0.83514,0.82148,0.82944,0.82529,0.82595,0.52846,0.5  
1538,0.49651,0.53586,0.51557,0.53008,0.52359,0.53235,0.53147,0.56402,0  
.22751,0.22698,0.22843,0.22899,0.22819,0.22756,0.22764,0.22727,0.22783  
,0.22735,0.22813,0.2282,0.22771,0.22748,0.22739,0.22865,0.22816,0.8276  
2,0.83197,0.82709,0.82321,0.82495,0.83457,0.51003,0.55164,0.52285,0.52  
895,0.4865,0.52318,0.49594,0.39281,0.49854,0.56065,0.53051,0.22698,0.2  
2789,0.22903,0.22731,0.22755,0.22776,0.22777,0.22821,0.22792,0.22726,0  
.22708,0.22759,0.22731,0.17239,0.15258,0.18354,0.22791,0.8272,0.84163,  
0.81944,0.83065,0.83495,0.82657,0.82226,0.53194,0.52748,0.52735,0.4947  
6,0.52368,0.52787,0.47626,0.53215,0.55335,0.55725,0.54664,0.22802,0.22  
883,0.22842,0.22785,0.22719,0.22724,0.22814,0.22807,0.22842,0.22792,0.  
22721,0.17055,0.16409,0.18044,0.14746,0.16436,0.1732,0.22732,0.84282,0  
.83995,0.83132,0.83354,0.83021,0.82697,0.82966,0.53913,0.54815,0.52848  
,0.53241,0.47096,0.49829,0.49124,0.5102,0.56819,0.61402,0.49795,0.2275  
9,0.2279,0.22724,0.22783,0.22766,0.2295,0.22676,0.22757,0.22781,0.1605  
,0.17229,0.17054,0.16323,0.18597,0.16544,0.17221,0.17209,0.18772,0.228  
19,0.82245,0.8383,0.83211,0.82424,0.82714,0.83114,0.82432,0.6241,0.519  
19,0.52434,0.52886,0.53876,0.56127,0.53875,0.53957,0.53265,0.49404,0.5  
186,0.52806,0.22764,0.22875,0.22642,0.22814,0.22835,0.22698,0.17996,0.  
17011,0.16949,0.17562,0.17212,0.16756,0.17521,0.17625,0.17567,0.17239,  
0.17108,0.17241,0.82439,0.82458,0.81522,0.82061,0.82333,0.83524,0.8261  
2,0.46153,0.46534,0.44406,0.53831,0.52326,0.52798,0.51171,0.52919,0.51  
559,0.50041,0.52462,0.59184,0.22838,0.22795,0.22797,0.18012,0.17337,0.  
17664,0.17123,0.1587,0.18557,0.16487,0.16326,0.17195,0.16758,0.17154,0  
.17229,0.17454,0.16193,0.17615,0.83174,0.82767,0.83329,0.8311,0.83398,  
0.81977,0.82211,0.83374,0.82765,0.53267,0.49513,0.52351,0.51789,0.4657  
9,0.52433,0.55266,0.6226,0.52775,0.49486,0.48564,0.17853,0.15624,0.166  
64,0.17562,0.16822,0.16879,0.17036,0.17136,0.16654,0.17155,0.16645,0.1  
7177,0.17343,0.17195,0.17118,0.17276,0.16627,0.16392,0.83285,0.8331,0.  
82667,0.83349,0.83313,0.83579,0.8257,0.81866,0.82759,0.51549,0.52752,0  
.39318,0.37896,0.41744,0.38904,0.39607,0.39031,0.39835,0.40858,0.38833

,0.17134,0.17001,0.17446,0.17265,0.17531,0.16436,0.17174,0.15651,0.17777,0.16476,0.18143,0.17354,0.17157,0.16904,0.17239,0.17982,0.17558,0.17016,0.83075,0.83002,0.8262,0.81795,0.83166,0.82287,0.8263,0.82843,0.82817,0.48622,0.4167,0.39054,0.37546,0.41255,0.39673,0.36983,0.42682,0.4004,0.39256,0.39828,0.17979,0.15592,0.1717,0.16179,0.17669,0.1724,0.17185,0.15611,0.16962,0.17123,0.19281,0.16966,0.17206,0.1683,0.18473,0.17941,0.17279,0.16971,0.8295,0.81714,0.83607,0.83709,0.83583,0.82094,0.84169,0.40615,0.43464,0.473,0.39876,0.40847,0.43683,0.33976,0.38326,0.39884,0.3958,0.37099,0.40406,0.3542,0.17243,0.17215,0.16917,0.16916,0.16596,0.16376,0.18215,0.17696,0.1715,0.17104,0.16773,0.17141,0.17239,0.17246,0.17746,0.17257,0.15833,0.1687,0.82541,0.82597,0.82416,0.82445,0.83874,0.81421,0.46001,0.48489,0.45135,0.4845,0.47259,0.3728,0.37185,0.40977,0.38416,0.37387,0.41254,0.41349,0.35109,0.42238,0.18671,0.17012,0.17199,0.18295,0.16236,0.17881,0.17173,0.17033,0.16753,0.16883,0.17119,0.17157,0.18051,0.16987,0.166,0.17981,0.18239,0.17173,0.82651,0.8253,0.83188,0.83155,0.83552,0.57789,0.47288,0.36044,0.45377,0.53295,0.49782,0.40722,0.31666,0.40256,0.4001,0.39106,0.3895,0.38355,0.39106,0.42104,0.17017,0.17246,0.17245,0.18069,0.16804,0.17154,0.17135,0.16215,0.18448,0.17212,0.1782,0.16338,0.16747,0.18818,0.1665,0.16506,0.17214,0.16481,0.83005,0.83005,0.82608,0.38819,0.48277,0.45919,0.41,0.47173,0.47171,0.44602,0.47467,0.35612,0.38149,0.40638,0.40052,0.39223,0.32987,0.40076,0.35245,0.39911,0.16058,0.16163,0.17328,0.18163,0.1721,0.17204,0.17633,0.17188,0.15995,0.1731,0.1673,0.17404,0.18234,0.17222,0.17387,0.17271,0.17253,0.17071,0.83839,0.43772,0.47096,0.48489,0.47619,0.57156,0.38457,0.47318,0.45417,0.54967,0.39146,0.30385,0.416,0.36767,0.41661,0.37995,0.40601,0.3214,0.39012,0.17133,0.17102,0.16291,0.17199,0.17251,0.16634,0.16494,0.18199,0.18345,0.1623,0.17238,0.17232,0.16532,0.17579,0.16222,0.17923,0.18968,0.1167,0.47158,0.47568,0.47182,0.47227,0.47534,0.49656,0.45348,0.53406,0.39401,0.52431,0.42933,0.40815,0.39653,0.38963,0.34356,0.3795,0.41025,0.38311,0.31704,0.17185,0.16807,0.17714,0.17113,0.18202,0.16908,0.17064,0.17193,0.17533,0.17116,0.17237,0.16066,0.15392,0.17139,0.17183,0.16433,0.16441,0.11571,0.5522,0.46854,0.47614,0.50975,0.48119,0.48298,0.45629,0.47775,0.4545,0.46499,0.39205,0.43175,0.43255,0.38938,0.42365,0.39193,0.33096,0.40944,0.16364,0.16805,0.16536,0.16527,0.17117,0.17159,0.17679,0.17206,0.17554,0.16606,0.20721,0.16539,0.17938,0.1775,0.17344,0.15809,0.17147,0.172,0.11607,0.55818,0.46983,0.40658,0.54405,0.43989,0.47522,0.45273,0.44466,0.49838,0.50075,0.39402,0.40224,0.4013,0.3993,0.39778,0.42552,0.43524,0.39215,0.16309,0.16893,0.18264,0.17115,0.14749,0.1774,0.17145,0.18234,0.16755,0.18279,0.17748,0.18403,0.17553,0.16766,0.1717,0.16441,0.16359,0.11573,0.1657,0.11604,0.44332,0.44982,0.45917,0.4843,0.55039,0.44831,0.47114,0.48645,0.47145,0.37476,0.42548,0.39575,0.46388,0.41789,0.36751,0.17372,0.17148,0.17214,0.16455,0.17281,0.17837,0.15922,0.17262,0.18997,0.17171,0.17043,0.17114,0.17197,0.17153,0.19304,0.18247,0.16819,0.16965,0.11607,0.11585,0.11594,0.11568,0.39958,0.38297,0.5725,0.50523,0.51709,0.48163,0.47959,0.27352,0.47401,0.4442,0.31783,0.39011,0.17167,0.17176,0.16511,0.1656,0.16594,0.17109,0.17198,0.17439,0.16667,0.16299,0.17147,0.17963,0.16288,0.17113,0.17195,0.17183,0.17713,0.16591,0.18185,0.17224,0.11647,0.11639,0.11583,0.11564,0.11596,0.11612,0.54729,0.49094,0.47422,0.48664,0.50322,0.59089,0.47812,0.45742,0.17239,0.18142,0.16013,0.1814,0.1618,0.17194,0.17186,0.16686,0.17673,0.17171,0.17348,0.17548,0.17003,0.17117,0.17218,0.17148,0.16682,0.17424,0.16971,0.19264,0.16281,0



.17246,0.17106,0.11581,0.11657,0.11553,0.11558,0.11553,0.11597,0.4834,  
0.46417,0.46945,0.5227,0.47472,0.11516,0.11583,0.165,0.16745,0.16839,0  
.17138,0.16768,0.17196,0.17231,0.17223,0.1692,0.17523,0.1729,0.17155,0  
.16777,0.15988,0.17876,0.17923,0.18388,0.1722,0.1773,0.17143,0.1719,0.  
11627,0.11595,0.1162,0.11601,0.11614,0.11543,0.11622,0.11626,0.11613,0  
.11531,0.50579,0.49087,0.11602,0.11629,0.11626,0.1159,0.17046,0.1717,0  
.16654,0.17802,0.16505,0.18339,0.17281,0.16661,0.17065,0.17217,0.17494  
,0.18303,0.17643,0.17175,0.16636,0.16518,0.17206,0.17589,0.16886,0.116  
23,0.11661,0.11574,0.11628,0.11588,0.11654,0.11569,0.11636,0.11535,0.1  
1649,0.11595,0.1165,0.11609,0.11606,0.11621,0.1162,0.1159,0.17206,0.16  
774,0.17139,0.17173,0.16812,0.17212,0.17491,0.16931,0.1722,0.18357,0.1  
6473,0.17847,0.17317,0.1783,0.17788,0.1718,0.11546,0.11627,0.11622,0.1  
1575,0.11554,0.11639,0.11607,0.11619,0.11485,0.11564,0.11632,0.11573,0  
.1156,0.11643,0.11552,0.1164,0.11578,0.11589,0.11632,0.17905,0.17157,0  
.16351,0.16423,0.1706,0.16195,0.17375,0.16365,0.17204,0.16049,0.16652,  
0.17455,0.17127,0.11557,0.11604,0.11634,0.11543,0.11697,0.11568,0.1155  
4,0.11597,0.11573,0.11626,0.11582,0.11575,0.11659,0.11603,0.11593,0.11  
566,0.11606,0.11587,0.11582,0.11605,0.11619,0.16742,0.17142,0.1666,0.1  
7057,0.17581,0.17133,0.17168,0.1802,0.17662,0.11598,0.11581,0.11606,0.  
11587,0.1159,0.11599,0.11558,0.1156,0.11666,0.11638,0.11608,0.11524,0.  
11652,0.11644,0.11595,0.11549,0.1158,0.11619,0.11561,0.11525,0.11644,0  
.11627,0.11629,0.11476,0.1164,0.17856,0.17142,0.17178,0.17153,0.11633,  
0.11547,0.11676,0.1157,0.1155,0.11598,0.11577,0.11551,0.11632,0.11595,  
0.1157,0.1159,0.11562,0.11622,0.11522,0.1156,0.11615,0.1155,0.11566,0.  
11594,0.11568,0.1155,0.1159,0.11559,0.11596,0.11567,0.11573,0.11627,0.  
11555,0.11543,0.11547,0.11599,0.11623,0.11644,0.11581,0.11682,0.11555,  
0.11566,0.1166,0.11574,0.11576,0.11587,0.1156,0.11596,0.1152,0.11607,0  
.11621,0.1159,0.11574,0.11574,0.11602,0.11561,0.11541,0.11584,0.11573,  
0.11555,0.11554,0.11565,0.11601,0.11558,0.11591,0.11553,0.11568,0.1162  
,0.11574,0.1165,0.11599,0.11597,0.11607,0.11634,0.11586,0.11632,0.1158  
7,0.11677,0.11577,0.11579,0.1157,0.11539,0.11684,0.11637,0.11641,0.115  
74,0.11619,0.11583,0.11611,0.11607,0.11659,0.11626,0.11594,0.11645,0.1  
1638,0.11598,0.11583,0.1155,0.11609,0.116,0.11503,0.11529,0.11471,0.11  
558,0.11657,0.11589,0.11597,0.11643,0.11604,0.11564,0.11575,0.11581,0.  
11616,0.11564,0.11562,0.11613,0.11593,0.11661,0.11578,0.11541,0.11611,  
0.11579,0.11637,0.11563,0.11566,0.11579,0.11601,0.11597,0.11599,0.1161  
3,0.11605,0.11555,0.11511,0.11592,0.11614,0.11678,0.11587,0.11607,0.11  
601,0.11536,0.1159,0.11616,0.11647,0.11606,0.11546,0.11688,0.11644,0.1  
1642,0.11603,0.11597,0.11656,0.11585,0.11531,0.116,0.11598,0.11543,0.1  
1586,0.11613,0.11612,0.11589,0.11563,0.11617,0.11628,0.11637,0.1161,0.  
11666,0.11611,0.11555,0.11624,0.11493,0.11629,0.11549,0.11518,0.11518,  
0.11593,0.11555,0.11531,0.11555,0.11642,0.11613,0.11624,0.11593,0.1156  
4,0.11558,0.11576,0.1163,0.1157,0.11571,0.11577,0.11511,0.11564,0.1158  
3,0.11566,0.11641,0.11596,0.11592,0.11588,0.11572,0.11599  
0.21691,0.21694,0.21628,0.21622,0.2167,0.21773,0.21589,0.21576,0.21604  
,0.21709,0.21534,0.21714,0.21577,0.21667,0.21716,0.21589,0.21573,0.216  
73,0.21688,0.21712,0.43245,0.37609,0.39737,0.41363,0.21668,0.21671,0.2  
1718,0.21597,0.21662,0.21664,0.217,0.21588,0.2164,0.21642,0.21682,0.21  
665,0.21539,0.21654,0.21768,0.65925,0.47216,0.40178,0.45199,0.41111,0.  
43792,0.43324,0.21592,0.21631,0.21688,0.21577,0.21542,0.21697,0.21712,  
0.21623,0.21572,0.21573,0.21661,0.21708,0.2174,0.21618,0.21599,0.65039  
,0.64888,0.41796,0.49126,0.43611,0.43995,0.48068,0.50075,0.41914,0.462

18,0.21589,0.21543,0.21603,0.21637,0.21728,0.21681,0.2162,0.21676,0.21707,0.21581,0.21703,0.21649,0.21743,0.21659,0.2168,0.64668,0.64617,0.65132,0.44527,0.40638,0.45348,0.47385,0.38844,0.43562,0.42286,0.45888,0.43173,0.21697,0.21594,0.21605,0.21644,0.21601,0.21678,0.21733,0.21596,0.21645,0.21692,0.2166,0.21612,0.21626,0.21637,0.21774,0.21575,0.65865,0.64941,0.65911,0.65143,0.43945,0.43226,0.43866,0.42509,0.47407,0.43084,0.42801,0.43767,0.45867,0.44981,0.21678,0.21705,0.21694,0.21714,0.21633,0.2165,0.21673,0.21645,0.21725,0.21678,0.21595,0.21741,0.21765,0.21642,0.21684,0.21592,0.63833,0.65912,0.64209,0.6526,0.6476,0.65344,0.4343,0.42294,0.41146,0.44035,0.42615,0.43846,0.43092,0.43797,0.43696,0.46041,0.21624,0.21559,0.21717,0.21779,0.21695,0.2161,0.21637,0.21597,0.21644,0.21618,0.21646,0.21697,0.21675,0.21645,0.21635,0.21808,0.21673,0.64748,0.6557,0.65464,0.64572,0.64838,0.65758,0.4214,0.44948,0.42921,0.43366,0.40433,0.42983,0.41012,0.33613,0.41387,0.45917,0.43736,0.21517,0.2162,0.21798,0.21594,0.21638,0.2161,0.2163,0.21686,0.2166,0.21596,0.21562,0.21624,0.21617,0.15644,0.13566,0.16873,0.21662,0.65114,0.65731,0.64078,0.65303,0.66004,0.65335,0.64431,0.43843,0.43369,0.43338,0.40909,0.43119,0.43334,0.39563,0.43762,0.45288,0.45486,0.44548,0.21644,0.21787,0.21749,0.21643,0.21608,0.21624,0.21678,0.21682,0.21712,0.21692,0.21595,0.15478,0.14814,0.16602,0.12982,0.14822,0.15775,0.21631,0.6654,0.65934,0.65746,0.65784,0.65089,0.65002,0.65178,0.44227,0.44758,0.43447,0.43965,0.39033,0.4133,0.40802,0.42078,0.46712,0.4954,0.41295,0.2161,0.21653,0.2158,0.21701,0.21677,0.21779,0.21523,0.21643,0.21654,0.14357,0.15639,0.15529,0.14716,0.17146,0.14941,0.15675,0.15635,0.17312,0.21651,0.64122,0.6612,0.65242,0.64799,0.65267,0.6561,0.65043,0.50184,0.4288,0.43018,0.43366,0.44177,0.45929,0.437,0.44138,0.43793,0.40838,0.42599,0.43485,0.21661,0.21759,0.21488,0.2166,0.21692,0.21646,0.16532,0.15444,0.15378,0.16025,0.15683,0.15154,0.16017,0.16108,0.16014,0.15664,0.15539,0.15682,0.64991,0.64137,0.63926,0.64541,0.64242,0.65617,0.64662,0.3859,0.38909,0.37396,0.44088,0.43082,0.43507,0.42248,0.43426,0.4245,0.4149,0.43194,0.47992,0.21714,0.21685,0.21679,0.16534,0.15814,0.16146,0.15579,0.14209,0.17116,0.14901,0.14737,0.15609,0.15162,0.15625,0.15665,0.15924,0.14547,0.16097,0.65295,0.65475,0.65643,0.65825,0.65182,0.64587,0.64331,0.65235,0.65063,0.4391,0.40918,0.43053,0.42732,0.38732,0.428,0.45318,0.5045,0.43391,0.40982,0.40337,0.1634,0.13981,0.15117,0.16012,0.1526,0.15319,0.15495,0.15606,0.15085,0.15567,0.15064,0.15607,0.15797,0.15664,0.15604,0.15731,0.15036,0.14817,0.65048,0.66002,0.64792,0.652,0.65487,0.65552,0.64702,0.63651,0.64709,0.42504,0.43343,0.32457,0.30989,0.33924,0.31961,0.32507,0.32188,0.32565,0.33575,0.31807,0.15591,0.15447,0.15913,0.15728,0.16001,0.14811,0.15628,0.13995,0.16257,0.1487,0.16649,0.15871,0.1559,0.15317,0.157,0.16511,0.16068,0.15475,0.6556,0.65334,0.64684,0.64304,0.64714,0.64525,0.64955,0.65448,0.65288,0.38208,0.33877,0.32023,0.30662,0.33666,0.32597,0.3052,0.34803,0.32689,0.32316,0.32686,0.1646,0.1394,0.15646,0.14529,0.16164,0.15677,0.15629,0.13977,0.15389,0.15606,0.17834,0.1537,0.1564,0.15251,0.17039,0.16427,0.15713,0.15375,0.65645,0.6378,0.65666,0.65988,0.66007,0.64526,0.66033,0.321,0.34333,0.37336,0.32646,0.33141,0.36031,0.28117,0.31646,0.32521,0.32829,0.30679,0.3302,0.29334,0.15715,0.15636,0.15369,0.1536,0.15012,0.1477,0.16707,0.16217,0.1558,0.15509,0.15222,0.15582,0.15635,0.15689,0.1622,0.15722,0.14171,0.15303,0.64404,0.65018,0.64563,0.64771,0.6603,0.64184,0.36491,0.38191,0.35853,0.38338,0.37124,0.30788,0.30708,0.33443,0.31547,0.3084,0.33888,0.33591,0.29093,0.34652,0.17214,0.15441,0.156

35,0.16846,0.14541,0.16385,0.1561,0.15481,0.15148,0.15289,0.15549,0.15  
589,0.16574,0.15439,0.14985,0.16439,0.168,0.15644,0.65305,0.65035,0.65  
627,0.65032,0.66145,0.45644,0.3745,0.28551,0.35996,0.41959,0.39316,0.3  
3639,0.2656,0.32975,0.32876,0.32114,0.31904,0.31671,0.32167,0.34825,0.  
15459,0.15685,0.157,0.16595,0.15217,0.15581,0.15592,0.14584,0.16954,0.  
15679,0.16321,0.14714,0.15147,0.17379,0.15066,0.14925,0.15635,0.14838,  
0.64713,0.65179,0.64883,0.30665,0.38207,0.3642,0.32567,0.37202,0.37302  
,0.35233,0.3787,0.29643,0.31687,0.33208,0.32869,0.32173,0.27686,0.3263  
3,0.29341,0.32907,0.14391,0.14537,0.15804,0.16637,0.15654,0.15642,0.16  
107,0.15642,0.14352,0.15787,0.15147,0.15853,0.16785,0.15664,0.1587,0.1  
5728,0.157,0.15561,0.65777,0.34737,0.3734,0.38234,0.37505,0.45227,0.30  
559,0.37545,0.3599,0.43578,0.32075,0.25817,0.33967,0.30414,0.34102,0.3  
1198,0.3343,0.26958,0.32107,0.15574,0.1552,0.14662,0.15651,0.15705,0.1  
5023,0.14909,0.16689,0.1692,0.146,0.15692,0.15706,0.14934,0.16045,0.14  
591,0.16424,0.17556,0.096984,0.3726,0.37685,0.3726,0.37387,0.37635,0.3  
9211,0.35853,0.41958,0.31243,0.41312,0.34845,0.3327,0.32617,0.32041,0.  
28615,0.31238,0.33723,0.3147,0.26602,0.15632,0.15216,0.16212,0.15565,0  
.16749,0.15351,0.155,0.15664,0.16025,0.15549,0.15655,0.14419,0.13735,0  
.1559,0.15639,0.14809,0.14823,0.096017,0.43672,0.37087,0.37566,0.40335  
,0.38107,0.38186,0.36281,0.37965,0.36088,0.36832,0.32297,0.35457,0.353  
47,0.32136,0.34904,0.32173,0.27683,0.33277,0.14781,0.15204,0.14921,0.1  
4943,0.15582,0.15615,0.16199,0.15637,0.16047,0.15031,0.19446,0.14955,0  
.16421,0.16263,0.15793,0.14157,0.15602,0.15657,0.096195,0.44005,0.3741  
4,0.32246,0.43202,0.34742,0.37577,0.3556,0.35162,0.39601,0.39647,0.323  
52,0.32939,0.3293,0.32964,0.32629,0.351,0.35305,0.32269,0.14686,0.1529  
1,0.16795,0.15582,0.13057,0.1623,0.15585,0.16751,0.15178,0.16848,0.162  
38,0.16958,0.16039,0.1515,0.15618,0.14815,0.14741,0.096333,0.096441,0.  
096015,0.35002,0.35648,0.36093,0.38169,0.4318,0.3545,0.37305,0.38622,0.  
.37383,0.30951,0.34847,0.32531,0.37946,0.34098,0.3032,0.15834,0.15566,  
0.15633,0.14838,0.15742,0.16354,0.14257,0.15705,0.17574,0.15633,0.1549  
,0.15526,0.15668,0.15612,0.17928,0.16818,0.1522,0.15409,0.096167,0.095  
838,0.096137,0.095809,0.31585,0.30343,0.45221,0.4012,0.41019,0.37854,0  
.38088,0.21863,0.37348,0.3631,0.26624,0.32037,0.15616,0.15608,0.14887,  
0.14999,0.14982,0.15556,0.15598,0.1588,0.1508,0.14678,0.15577,0.16452,  
0.14668,0.15576,0.15651,0.15637,0.16237,0.14985,0.16692,0.15651,0.0965  
93,0.096575,0.096272,0.096041,0.096425,0.096,0.43497,0.38929,0.37549,0  
.38426,0.39748,0.46679,0.37705,0.36196,0.15704,0.16672,0.14385,0.16666  
,0.1452,0.15651,0.15638,0.15029,0.1615,0.15603,0.15828,0.1602,0.15433,  
0.15561,0.15615,0.156,0.15092,0.15888,0.15401,0.17848,0.14705,0.15679,  
0.15612,0.096154,0.096774,0.095998,0.095983,0.095957,0.096046,0.38391,  
0.36892,0.36817,0.41418,0.37627,0.095443,0.096036,0.14896,0.15135,0.15  
257,0.15584,0.15219,0.15681,0.15671,0.15706,0.15375,0.15981,0.15751,0.  
15591,0.15199,0.14333,0.16396,0.16425,0.16966,0.15682,0.16245,0.15589,  
0.15629,0.096555,0.096402,0.096414,0.096256,0.096525,0.095766,0.096629  
,0.096563,0.096254,0.095584,0.40092,0.39059,0.096205,0.096603,0.096494  
,0.096209,0.15505,0.15642,0.15063,0.16303,0.14918,0.16829,0.15755,0.15  
053,0.15497,0.15699,0.15926,0.16842,0.16146,0.15616,0.15011,0.14917,0.  
15638,0.16063,0.15318,0.096478,0.096628,0.096059,0.096348,0.095973,0.0  
96495,0.095917,0.096766,0.095541,0.096647,0.096357,0.096771,0.096534,0  
.096273,0.096684,0.096469,0.096402,0.15636,0.15153,0.15586,0.15596,0.1  
5267,0.15635,0.15954,0.15363,0.1568,0.16907,0.1486,0.16337,0.1576,0.16  
295,0.16268,0.15611,0.095978,0.09662,0.096385,0.095742,0.095679,0.0968

08,0.096391,0.09646,0.095072,0.096056,0.096685,0.096227,0.095592,0.096328,0.095821,0.096609,0.096526,0.09608,0.096617,0.16394,0.15582,0.14742,0.14809,0.15527,0.14566,0.15843,0.14747,0.15656,0.14421,0.15067,0.15915,0.15593,0.096126,0.096348,0.096301,0.095722,0.096811,0.095948,0.095804,0.096045,0.095968,0.096624,0.096052,0.095928,0.096647,0.096175,0.096354,0.096006,0.09643,0.096088,0.096237,0.096084,0.096289,0.15124,0.15616,0.15069,0.1548,0.16064,0.156,0.15618,0.16535,0.16122,0.096047,0.096232,0.09632,0.095978,0.096348,0.096364,0.095758,0.096005,0.096665,0.096719,0.096411,0.095438,0.096648,0.096549,0.096094,0.095778,0.096304,0.096593,0.095622,0.095755,0.0964,0.096407,0.096538,0.095046,0.096603,0.16378,0.15607,0.15631,0.15578,0.096462,0.095513,0.096795,0.096073,0.095559,0.09619,0.095968,0.095948,0.096591,0.096689,0.096157,0.096027,0.096126,0.096601,0.095266,0.096101,0.096478,0.0958,0.095955,0.096328,0.095777,0.095791,0.096195,0.096149,0.09631,0.09617,0.095923,0.096621,0.095541,0.095687,0.095661,0.09608,0.096472,0.096634,0.096361,0.097003,0.095896,0.096065,0.096887,0.095764,0.095881,0.096242,0.095768,0.096014,0.095465,0.096209,0.096174,0.096393,0.095736,0.09595,0.096403,0.096166,0.09577,0.096177,0.096039,0.095501,0.095893,0.096202,0.096154,0.095627,0.0965,0.095688,0.095775,0.096009,0.095967,0.096532,0.096225,0.096552,0.096147,0.096647,0.096116,0.096563,0.09582,0.096827,0.096044,0.096077,0.095633,0.095803,0.09691,0.096666,0.096833,0.096196,0.096608,0.095985,0.096253,0.096179,0.096528,0.096374,0.096234,0.096701,0.096508,0.096305,0.096129,0.095646,0.096482,0.09631,0.095415,0.095456,0.09521,0.095984,0.096913,0.095891,0.096399,0.097019,0.096298,0.095943,0.095926,0.096125,0.09656,0.095965,0.095447,0.096376,0.096484,0.096764,0.09614,0.095807,0.096437,0.095871,0.096655,0.095829,0.095866,0.095915,0.096089,0.096072,0.096226,0.096489,0.096296,0.096192,0.095649,0.096168,0.096289,0.097343,0.096313,0.096277,0.096324,0.095501,0.096228,0.096687,0.096792,0.096154,0.096024,0.097065,0.096556,0.096543,0.096211,0.096023,0.096857,0.096273,0.095521,0.096155,0.096247,0.095485,0.096385,0.096382,0.096164,0.096266,0.095757,0.096478,0.096094,0.096216,0.096221,0.097161,0.096404,0.095796,0.096183,0.094996,0.096415,0.095764,0.095642,0.095581,0.09604,0.095909,0.095398,0.095639,0.096836,0.096377,0.096423,0.096105,0.095769,0.09563,0.095696,0.096549,0.096066,0.095669,0.095725,0.095663,0.096256,0.095818,0.09589,0.096798,0.096253,0.096301,0.096114,0.096185,0.096083

0.20197,0.20141,0.20088,0.20096,0.20165,0.20229,0.2006,0.20083,0.20094,0.20163,0.20047,0.20197,0.20005,0.20136,0.20154,0.20073,0.20066,0.20144,0.20113,0.20188,0.3696,0.3278,0.34444,0.35788,0.20167,0.20122,0.20155,0.20095,0.20166,0.20147,0.20143,0.20029,0.20142,0.20162,0.20172,0.20124,0.20038,0.20087,0.20177,0.54726,0.40583,0.34508,0.38553,0.35466,0.37685,0.37116,0.20076,0.20109,0.20112,0.20084,0.19981,0.20189,0.20182,0.20144,0.2001,0.20046,0.20128,0.20159,0.2022,0.20065,0.20034,0.53869,0.54277,0.35953,0.41385,0.3751,0.37734,0.41006,0.42399,0.3594,0.39669,0.20047,0.19996,0.20114,0.20118,0.20191,0.2016,0.20068,0.20157,0.20197,0.20062,0.20151,0.2015,0.20222,0.20138,0.20162,0.54056,0.54137,0.54489,0.3819,0.35173,0.38833,0.40614,0.33622,0.37242,0.36269,0.39259,0.37066,0.20146,0.20073,0.20079,0.20112,0.20075,0.20174,0.20158,0.20085,0.20136,0.20199,0.20124,0.20095,0.20094,0.20091,0.20223,0.20062,0.54732,0.54101,0.55039,0.54605,0.37552,0.37026,0.37628,0.36729,0.40608,0.37036,0.36959,0.37066,0.39307,0.38404,0.20177,0.20141,0.2017,0.20187,0.20108,0.20111,0.20144,0.20079,0.20179,0.20108,0.20073,0.20162,0.20196,0.2

0112,0.20141,0.20066,0.53039,0.54698,0.53447,0.54772,0.53976,0.54678,0.37428,0.36079,0.3557,0.37876,0.3663,0.37299,0.37081,0.37602,0.37525,0.39129,0.20105,0.20046,0.20194,0.2025,0.20155,0.20073,0.20101,0.20093,0.20141,0.20066,0.2011,0.20154,0.20142,0.20093,0.20097,0.20258,0.20166,0.53426,0.54548,0.5454,0.54024,0.543,0.54829,0.36324,0.38309,0.36714,0.37313,0.34725,0.36922,0.3535,0.29567,0.35747,0.39189,0.37507,0.20044,0.20118,0.2027,0.2008,0.20121,0.20087,0.20128,0.20165,0.20159,0.20068,0.20024,0.20085,0.20062,0.1406,0.11968,0.15313,0.20137,0.54026,0.54691,0.5327,0.54887,0.55211,0.54354,0.53448,0.37551,0.37282,0.36907,0.34961,0.37021,0.37446,0.34153,0.37658,0.38898,0.39042,0.382,0.20104,0.20207,0.20208,0.20148,0.20046,0.20095,0.20119,0.20157,0.20203,0.20155,0.20048,0.13864,0.13232,0.15018,0.1139,0.13262,0.14218,0.20116,0.55683,0.54713,0.55096,0.54976,0.53748,0.54322,0.5432,0.37805,0.38206,0.3756,0.37783,0.33543,0.35469,0.35117,0.36131,0.39901,0.4226,0.35717,0.20138,0.20097,0.20059,0.20142,0.2014,0.20252,0.20015,0.2012,0.20121,0.12759,0.14099,0.14001,0.13145,0.15572,0.13349,0.14081,0.14044,0.15705,0.20114,0.53371,0.5506,0.5434,0.53774,0.54512,0.54627,0.54059,0.425,0.36865,0.36776,0.37232,0.37768,0.39242,0.37343,0.37694,0.37419,0.35309,0.36521,0.37296,0.20104,0.2018,0.20011,0.20109,0.20138,0.20139,0.14964,0.13845,0.13801,0.14424,0.14121,0.13601,0.14414,0.14531,0.14428,0.14059,0.13977,0.14072,0.5392,0.5396,0.52902,0.53497,0.53663,0.54294,0.5409,0.33495,0.33714,0.32553,0.37791,0.36811,0.37446,0.36458,0.37183,0.36221,0.35866,0.37153,0.41051,0.20188,0.20149,0.20114,0.14926,0.14215,0.14587,0.13978,0.12621,0.15552,0.13344,0.13129,0.1401,0.13577,0.14064,0.14095,0.14348,0.12982,0.14509,0.54549,0.54468,0.54424,0.54827,0.54621,0.53402,0.53925,0.54463,0.54204,0.37706,0.35338,0.37257,0.36631,0.33485,0.36844,0.38999,0.42574,0.37262,0.35178,0.34759,0.14749,0.12413,0.13491,0.14402,0.13672,0.13715,0.13916,0.14039,0.13486,0.14002,0.13456,0.14014,0.14192,0.14076,0.14024,0.14141,0.13441,0.13261,0.54278,0.55299,0.54201,0.54268,0.54769,0.55218,0.53992,0.53025,0.53887,0.3664,0.37197,0.27702,0.26515,0.28936,0.2714,0.27818,0.27498,0.27586,0.28656,0.26983,0.14031,0.13873,0.14316,0.14124,0.14417,0.13221,0.14059,0.12385,0.14664,0.1328,0.15075,0.14298,0.14014,0.13726,0.14128,0.1491,0.14478,0.13913,0.54596,0.54368,0.5369,0.53272,0.54303,0.53787,0.54278,0.5446,0.54751,0.31879,0.28838,0.27438,0.26103,0.28491,0.27783,0.26291,0.2961,0.27922,0.27439,0.28015,0.14895,0.12324,0.14027,0.12938,0.14617,0.14115,0.14072,0.12407,0.13794,0.14022,0.16282,0.13748,0.14082,0.13664,0.1547,0.14872,0.14162,0.1379,0.55135,0.52677,0.5459,0.55432,0.55052,0.54126,0.54916,0.2655,0.28492,0.31093,0.27886,0.2803,0.311,0.23923,0.27108,0.27622,0.28195,0.26286,0.28201,0.25144,0.1414,0.14063,0.13785,0.13777,0.13447,0.13157,0.15123,0.14626,0.13976,0.13926,0.13638,0.14059,0.14034,0.14092,0.14652,0.14101,0.1262,0.13729,0.53801,0.54457,0.53803,0.54065,0.54981,0.53727,0.30756,0.31643,0.29997,0.32156,0.30963,0.26498,0.2634,0.28559,0.26985,0.26328,0.28958,0.28367,0.25047,0.29393,0.15652,0.13836,0.14078,0.15276,0.12946,0.14819,0.14074,0.13923,0.13564,0.13721,0.13979,0.14025,0.14989,0.13858,0.13443,0.14869,0.15257,0.14061,0.54499,0.54417,0.5493,0.54382,0.54758,0.37958,0.31334,0.23661,0.29897,0.34698,0.32681,0.28751,0.22958,0.2815,0.28004,0.2753,0.27435,0.27143,0.27453,0.299,0.13868,0.14105,0.14123,0.14984,0.13657,0.14035,0.1402,0.13013,0.15375,0.14137,0.14772,0.13135,0.1356,0.15806,0.1346,0.13337,0.14047,0.13237,0.54328,0.53589,0.5373,0.25459,0.31798,0.3045,0.26918,0.30966,0.31049,0.29346,0.31718,0.2546,0.2717,0.28373,0.2805,0.27496,0.23969,0.2777

7,0.25248,0.28163,0.12841,0.12916,0.14228,0.15045,0.14056,0.14053,0.14  
521,0.14058,0.12751,0.14213,0.1354,0.14281,0.15255,0.14074,0.14303,0.1  
4157,0.14104,0.13968,0.54383,0.28777,0.31082,0.32022,0.31253,0.37901,0  
.25463,0.31322,0.29872,0.36035,0.27376,0.22605,0.28821,0.26141,0.28969  
,0.26546,0.28604,0.2308,0.27605,0.14016,0.13953,0.13071,0.14079,0.1411  
6,0.13431,0.13287,0.15132,0.15386,0.13006,0.14088,0.14165,0.1334,0.144  
44,0.13017,0.14844,0.16015,0.08063,0.30967,0.31438,0.3103,0.31182,0.31  
375,0.32729,0.29795,0.3514,0.26175,0.34384,0.29468,0.28409,0.27864,0.2  
7464,0.24594,0.26845,0.28885,0.26891,0.23006,0.14048,0.1363,0.14618,0.  
13995,0.15157,0.13754,0.1386,0.14061,0.1444,0.13968,0.1406,0.12831,0.1  
2138,0.14039,0.14057,0.13235,0.13258,0.079772,0.36694,0.30916,0.31226,  
0.33593,0.31743,0.31903,0.30305,0.31728,0.30173,0.30727,0.27664,0.3027  
3,0.29991,0.27486,0.29952,0.27675,0.2382,0.28275,0.13215,0.13635,0.133  
52,0.13352,0.14017,0.14024,0.1463,0.14059,0.14453,0.13442,0.17878,0.13  
331,0.14851,0.14695,0.14265,0.12612,0.13996,0.14057,0.079919,0.36796,0  
.31072,0.26781,0.36244,0.29092,0.31331,0.2962,0.29571,0.3309,0.33069,0  
.27617,0.2806,0.2814,0.28209,0.27974,0.30014,0.29839,0.27471,0.13108,0  
.13716,0.15208,0.14004,0.11464,0.14642,0.14012,0.15186,0.13566,0.15307  
,0.14648,0.15383,0.14432,0.13567,0.14009,0.13237,0.13153,0.080172,0.08  
0086,0.079663,0.28929,0.29721,0.30027,0.31819,0.35989,0.29676,0.30778,  
0.32276,0.31312,0.26361,0.29726,0.27834,0.3227,0.2902,0.25978,0.14296,  
0.14017,0.14065,0.13244,0.14161,0.14815,0.12712,0.14138,0.15997,0.1406  
2,0.13889,0.1396,0.14085,0.14013,0.1641,0.15224,0.13641,0.13794,0.0797  
52,0.079502,0.080016,0.079654,0.26351,0.2535,0.37648,0.33459,0.34147,0  
.31533,0.31719,0.18168,0.31279,0.30952,0.2297,0.27409,0.14034,0.14034,  
0.13338,0.13424,0.13411,0.13972,0.14031,0.14311,0.13502,0.13054,0.1396  
1,0.14853,0.1307,0.13959,0.14052,0.14081,0.14661,0.13408,0.15144,0.140  
78,0.08029,0.080334,0.080122,0.079816,0.080338,0.080008,0.36186,0.3250  
8,0.31257,0.31985,0.33142,0.38763,0.3122,0.2998,0.14119,0.15108,0.1283  
5,0.15121,0.12931,0.14091,0.14084,0.13438,0.14541,0.14028,0.1425,0.144  
66,0.13858,0.14028,0.14081,0.14027,0.13529,0.14302,0.13833,0.16307,0.1  
3111,0.1409,0.14002,0.079919,0.080932,0.079811,0.079392,0.079597,0.079  
856,0.32074,0.30721,0.30346,0.34422,0.31171,0.079299,0.079796,0.13266,  
0.13586,0.13689,0.14007,0.13629,0.14126,0.14098,0.14086,0.13785,0.1441  
4,0.1424,0.14003,0.1362,0.12772,0.14821,0.14851,0.15434,0.14134,0.1471  
5,0.14044,0.14094,0.080244,0.080013,0.080195,0.079714,0.080455,0.07994  
1,0.080447,0.080432,0.079996,0.079164,0.3348,0.32815,0.079803,0.080454  
,0.080569,0.079822,0.13918,0.14065,0.13453,0.14726,0.13323,0.15227,0.1  
4193,0.13439,0.13934,0.14124,0.14306,0.15257,0.146,0.14058,0.13443,0.1  
3326,0.14067,0.14498,0.13734,0.080006,0.080498,0.079751,0.080126,0.079  
951,0.080236,0.079811,0.080516,0.07949,0.080384,0.079809,0.080686,0.08  
0224,0.080261,0.080424,0.080076,0.08009,0.14046,0.13587,0.14017,0.1403  
,0.1365,0.14061,0.14374,0.13787,0.14084,0.15371,0.13226,0.1475,0.14154  
,0.14725,0.14693,0.14033,0.079808,0.080585,0.080025,0.079574,0.079565,  
0.080298,0.080405,0.080064,0.079079,0.079618,0.080428,0.080176,0.07953  
5,0.080163,0.079496,0.080467,0.080243,0.079915,0.080176,0.14825,0.1399  
7,0.13127,0.13226,0.13958,0.12948,0.14273,0.13144,0.14088,0.12812,0.13  
489,0.14364,0.14013,0.079791,0.080216,0.079972,0.079671,0.080633,0.079  
902,0.079719,0.0797,0.079593,0.080791,0.07941,0.079262,0.080347,0.0799  
54,0.079808,0.079682,0.079834,0.079759,0.080227,0.079861,0.080257,0.13  
513,0.14019,0.13482,0.13889,0.14464,0.13994,0.14078,0.14917,0.14539,0.  
079559,0.080102,0.0802,0.079689,0.080021,0.080379,0.079471,0.07984,0.0

80455,0.08041,0.079985,0.079537,0.080319,0.079975,0.079778,0.079784,0.080185,0.080354,0.079527,0.079962,0.079958,0.079958,0.080139,0.078852,0.080193,0.14807,0.14003,0.14018,0.13999,0.080095,0.079566,0.080235,0.079837,0.079626,0.079888,0.079903,0.079701,0.080405,0.080665,0.080078,0.079805,0.0801,0.080509,0.079201,0.079794,0.080146,0.079515,0.079772,0.080211,0.079611,0.079379,0.079834,0.079475,0.079945,0.080005,0.079819,0.080196,0.079438,0.079698,0.079212,0.080106,0.080015,0.080388,0.079898,0.080982,0.079767,0.079607,0.080328,0.079556,0.079564,0.080191,0.079798,0.079781,0.079356,0.079724,0.079745,0.080073,0.079403,0.079731,0.080198,0.079804,0.079533,0.079934,0.079811,0.079214,0.079533,0.080059,0.079929,0.079509,0.080275,0.079597,0.07955,0.079616,0.079752,0.079722,0.079861,0.08038,0.079784,0.080341,0.079794,0.080228,0.079614,0.080714,0.079585,0.079944,0.079614,0.079486,0.080541,0.080482,0.080789,0.080122,0.08026,0.079736,0.080072,0.079525,0.080066,0.080045,0.07987,0.080419,0.080032,0.080429,0.079775,0.079336,0.07997,0.080007,0.079348,0.079397,0.079132,0.079702,0.080583,0.079459,0.080297,0.080708,0.08023,0.079844,0.079828,0.079787,0.080332,0.07957,0.079339,0.080156,0.080259,0.080518,0.079865,0.079489,0.079977,0.079527,0.080421,0.079326,0.079627,0.079578,0.079921,0.079866,0.079987,0.080389,0.079976,0.079928,0.079683,0.080034,0.080339,0.081088,0.080077,0.0804,0.080209,0.079575,0.079935,0.080393,0.080505,0.079943,0.079814,0.080683,0.080462,0.080109,0.079971,0.079817,0.080884,0.079764,0.07903,0.079921,0.080037,0.079132,0.080171,0.079906,0.079998,0.07996,0.079342,0.080277,0.07982,0.080005,0.080014,0.080602,0.080371,0.079409,0.079843,0.078843,0.080084,0.079665,0.079242,0.079262,0.079682,0.079595,0.079557,0.079415,0.080605,0.080283,0.080183,0.080183,0.079523,0.079546,0.079365,0.080324,0.079813,0.079566,0.07903,0.079689,0.079741,0.079699,0.07911,0.080191,0.080045,0.079994,0.080149,0.079965,0.080252

0.18572,0.18554,0.18501,0.18506,0.18559,0.18605,0.1852,0.18486,0.18551,0.18553,0.18484,0.18584,0.18409,0.18548,0.18527,0.18544,0.18466,0.18554,0.18537,0.18518,0.32826,0.29245,0.30725,0.31969,0.1855,0.18542,0.1855,0.18527,0.18559,0.18558,0.18581,0.18466,0.18548,0.18588,0.18637,0.1854,0.18439,0.18498,0.18557,0.4828,0.35912,0.30698,0.34293,0.31435,0.33426,0.32875,0.18513,0.18553,0.18488,0.18507,0.18388,0.18577,0.18573,0.18555,0.18421,0.18428,0.18565,0.18597,0.18592,0.18509,0.18445,0.47417,0.47952,0.31964,0.36976,0.33468,0.33665,0.36379,0.37599,0.31726,0.35001,0.18485,0.18411,0.1855,0.18474,0.18625,0.18571,0.18508,0.18564,0.18611,0.18483,0.18536,0.18571,0.18638,0.1855,0.18576,0.47216,0.47628,0.47797,0.33812,0.31295,0.34466,0.35855,0.30138,0.33194,0.32105,0.34931,0.32792,0.18534,0.18491,0.18503,0.18508,0.18478,0.18561,0.18562,0.18502,0.18536,0.18565,0.18524,0.18465,0.18488,0.18498,0.18618,0.18481,0.47927,0.47478,0.48111,0.48374,0.33325,0.33011,0.33456,0.32597,0.35545,0.3284,0.32941,0.32882,0.35034,0.34239,0.18621,0.18574,0.18559,0.18612,0.18531,0.18468,0.18563,0.18504,0.18543,0.18495,0.18499,0.18557,0.18591,0.18487,0.18522,0.18455,0.46121,0.48081,0.47203,0.48434,0.47646,0.4843,0.33393,0.31956,0.31543,0.3363,0.32709,0.33138,0.32872,0.3354,0.33306,0.34768,0.18538,0.18449,0.18656,0.18679,0.18592,0.18515,0.18482,0.18499,0.18509,0.18478,0.18518,0.18552,0.18547,0.18475,0.18488,0.18666,0.18555,0.46707,0.47879,0.4804,0.47175,0.47335,0.48576,0.32545,0.33987,0.32565,0.33066,0.30916,0.3283,0.31565,0.26603,0.31781,0.34742,0.33281,0.18453,0.1849,0.18681,0.18472,0.18518,0.18473,0.18537,0.18599,0.18564,0.18495,0.18473,0.18533,0.18511,0.12639,0.10624,0.13848,0.18527,0.4741

2,0.48301,0.4631,0.48069,0.48566,0.47838,0.46791,0.3353,0.33342,0.3271  
5,0.31021,0.32717,0.33507,0.30496,0.3356,0.34464,0.3475,0.3381,0.18522  
,0.18589,0.18592,0.18581,0.18524,0.18524,0.18522,0.18567,0.18591,0.185  
94,0.18496,0.12459,0.1181,0.13577,0.10062,0.11848,0.12807,0.18535,0.48  
59,0.48045,0.48222,0.48727,0.46756,0.47758,0.47909,0.33572,0.34148,0.3  
376,0.33681,0.29768,0.31617,0.31287,0.32081,0.3543,0.37311,0.3179,0.18  
596,0.18525,0.18501,0.18521,0.18504,0.18618,0.18436,0.1852,0.18516,0.1  
1395,0.12728,0.12573,0.11761,0.14111,0.11951,0.12674,0.12625,0.14264,0  
.18525,0.47329,0.47795,0.47288,0.47295,0.47652,0.47817,0.47934,0.3771,  
0.3278,0.32747,0.32725,0.33436,0.34757,0.33146,0.3339,0.33288,0.31433,  
0.32512,0.33188,0.18535,0.18583,0.18409,0.18524,0.18518,0.18504,0.1352  
1,0.12427,0.12392,0.12998,0.12706,0.12209,0.13018,0.13103,0.13032,0.12  
633,0.12585,0.12649,0.47608,0.47497,0.46148,0.47636,0.46951,0.47331,0.  
47466,0.29828,0.2995,0.2917,0.33414,0.32633,0.33229,0.3257,0.33093,0.3  
2359,0.3187,0.32932,0.36417,0.18555,0.18594,0.18498,0.13527,0.12795,0.  
1317,0.12558,0.11285,0.14125,0.11954,0.11761,0.12646,0.12176,0.12664,0  
.12685,0.12956,0.11629,0.13093,0.48032,0.47833,0.4761,0.48264,0.48216,  
0.4677,0.47943,0.47843,0.47497,0.33427,0.31562,0.33127,0.32642,0.29786  
,0.32872,0.34683,0.37655,0.33244,0.31419,0.30921,0.13298,0.11024,0.121  
16,0.13003,0.12303,0.12309,0.12481,0.12639,0.12095,0.12587,0.12081,0.1  
2581,0.12804,0.12655,0.12655,0.12728,0.12029,0.11864,0.47669,0.48482,0  
.47967,0.47368,0.47997,0.48473,0.47807,0.46475,0.47008,0.32799,0.33292  
,0.24401,0.2349,0.25667,0.23866,0.24774,0.24417,0.24391,0.2538,0.23809  
,0.12625,0.12436,0.12902,0.12727,0.13006,0.11804,0.12663,0.11041,0.132  
21,0.11909,0.13619,0.12843,0.12623,0.12326,0.12716,0.13499,0.13074,0.1  
2514,0.47696,0.47201,0.47209,0.47075,0.4722,0.47434,0.47506,0.47952,0.  
47953,0.28028,0.2545,0.24299,0.23221,0.25111,0.24497,0.23288,0.26331,0  
.24732,0.24298,0.24686,0.13437,0.10994,0.12626,0.11526,0.1319,0.12744,  
0.12682,0.11076,0.12414,0.12606,0.14804,0.12328,0.12682,0.12259,0.1403  
9,0.13421,0.12735,0.12369,0.4823,0.46359,0.48066,0.48943,0.48326,0.477  
05,0.47986,0.23359,0.24991,0.27301,0.24569,0.24827,0.27784,0.21087,0.2  
394,0.24473,0.24887,0.2329,0.25072,0.22272,0.12724,0.12642,0.1239,0.12  
382,0.12081,0.11787,0.1367,0.13211,0.12577,0.12528,0.12253,0.12645,0.1  
2579,0.1268,0.1322,0.12687,0.1124,0.1238,0.47256,0.47746,0.4705,0.4717  
2,0.48227,0.46983,0.27052,0.27587,0.25932,0.28074,0.27043,0.23692,0.23  
229,0.25254,0.2373,0.23244,0.25538,0.25042,0.22149,0.26038,0.14237,0.1  
243,0.12686,0.13835,0.11588,0.13439,0.12674,0.12548,0.12138,0.12324,0.  
12594,0.12615,0.13579,0.12441,0.12058,0.13456,0.13785,0.12664,0.4788,0  
.47829,0.47552,0.47577,0.4772,0.33238,0.27387,0.2064,0.26143,0.30333,0  
.2814,0.25504,0.2039,0.24894,0.24821,0.24304,0.24512,0.24067,0.2422,0.  
26645,0.12447,0.12715,0.12691,0.13566,0.12247,0.12669,0.12601,0.1168,0  
.13941,0.12738,0.133,0.11774,0.12126,0.14337,0.12087,0.11962,0.12638,0  
.11822,0.4775,0.46861,0.46807,0.22423,0.27943,0.26527,0.23515,0.26871,  
0.27146,0.25574,0.27739,0.22627,0.23944,0.25004,0.24785,0.24275,0.2132  
,0.24521,0.22556,0.25013,0.11439,0.11511,0.12831,0.13635,0.12653,0.126  
47,0.1308,0.12642,0.11413,0.12831,0.12147,0.12855,0.13784,0.12658,0.12  
881,0.12753,0.12702,0.12557,0.47752,0.25096,0.27216,0.27921,0.27265,0.  
33238,0.22154,0.27356,0.26144,0.31514,0.24305,0.20231,0.25625,0.23195,  
0.25657,0.23626,0.25444,0.20548,0.24399,0.126,0.12531,0.11699,0.12646,  
0.1274,0.1206,0.11901,0.13688,0.13972,0.11619,0.12677,0.12711,0.11964,  
0.13037,0.11631,0.13378,0.14547,0.068287,0.26917,0.2757,0.2709,0.27211  
,0.27125,0.28439,0.26131,0.30857,0.22816,0.30186,0.25662,0.25108,0.246



08,0.2439,0.21821,0.23905,0.25455,0.23936,0.2043,0.12607,0.12219,0.132  
12,0.12576,0.1374,0.12341,0.12445,0.1263,0.13005,0.12569,0.12645,0.114  
42,0.10809,0.12589,0.12674,0.11848,0.11851,0.067407,0.32336,0.27217,0.  
27372,0.2933,0.2795,0.28048,0.26415,0.27789,0.26465,0.26923,0.2451,0.2  
6762,0.26364,0.2427,0.2646,0.24521,0.21037,0.24872,0.11838,0.12217,0.1  
1965,0.11974,0.12613,0.12665,0.13208,0.12666,0.13039,0.12016,0.16345,0  
.11906,0.13458,0.13267,0.12794,0.11237,0.12558,0.12663,0.06807,0.32088  
,0.27074,0.23348,0.31828,0.25554,0.2753,0.25813,0.25861,0.28937,0.2882  
3,0.24388,0.24677,0.25069,0.24876,0.24908,0.26816,0.26287,0.24326,0.11  
768,0.12309,0.13751,0.12583,0.1011,0.13218,0.12589,0.13712,0.12156,0.1  
3843,0.1324,0.13958,0.13008,0.12163,0.1261,0.11854,0.11736,0.067751,0.  
068098,0.067505,0.25236,0.25891,0.26453,0.2789,0.31223,0.25942,0.27002  
,0.28226,0.27312,0.23288,0.26166,0.24664,0.2854,0.25627,0.22995,0.1283  
,0.12626,0.12648,0.11867,0.12741,0.13362,0.11335,0.12744,0.14543,0.126  
21,0.12449,0.12575,0.12672,0.12599,0.1495,0.1375,0.12252,0.12404,0.067  
402,0.0673,0.067691,0.067232,0.22974,0.22121,0.32891,0.29293,0.29603,0  
.27374,0.27817,0.15789,0.2731,0.27452,0.20287,0.24296,0.12628,0.12626,  
0.11964,0.12053,0.12027,0.12568,0.12625,0.12893,0.12124,0.11688,0.1259  
2,0.13374,0.11681,0.12549,0.12673,0.1265,0.13243,0.11996,0.13728,0.126  
75,0.067708,0.068038,0.067972,0.067574,0.067863,0.06776,0.31513,0.2826  
4,0.27456,0.28008,0.29012,0.33775,0.27167,0.26221,0.12681,0.13711,0.11  
444,0.13668,0.11584,0.1269,0.1268,0.12053,0.13137,0.1258,0.12831,0.130  
5,0.12414,0.12615,0.127,0.12652,0.12098,0.12902,0.12435,0.14826,0.1177  
4,0.12676,0.12651,0.067706,0.068664,0.06768,0.06703,0.067342,0.067754,  
0.2814,0.26647,0.2654,0.30128,0.27065,0.067204,0.067582,0.11895,0.1220  
4,0.1225,0.1261,0.12265,0.12702,0.12702,0.12664,0.12394,0.12992,0.1283  
4,0.12607,0.12229,0.11398,0.13381,0.13398,0.13985,0.12731,0.13307,0.12  
661,0.12668,0.068085,0.067841,0.067808,0.067605,0.068225,0.067492,0.06  
8466,0.068014,0.067653,0.067122,0.29428,0.28533,0.067592,0.06835,0.068  
121,0.067552,0.12526,0.12661,0.12017,0.13288,0.11925,0.13824,0.12769,0  
.12089,0.12563,0.12735,0.12854,0.13801,0.13197,0.12658,0.12062,0.1193,  
0.12653,0.13086,0.12368,0.06785,0.068219,0.067393,0.067995,0.067818,0.  
067979,0.06748,0.067983,0.067385,0.068238,0.067563,0.068195,0.067879,0  
.06821,0.068173,0.067755,0.06782,0.12626,0.12177,0.12618,0.1261,0.1224  
8,0.12663,0.12955,0.12389,0.12718,0.13905,0.1183,0.13318,0.12738,0.133  
07,0.13284,0.12614,0.067457,0.068336,0.067796,0.067034,0.067345,0.0680  
4,0.068044,0.067991,0.067147,0.067309,0.068148,0.067895,0.067246,0.067  
783,0.067283,0.068096,0.067904,0.067669,0.067789,0.13392,0.12609,0.117  
62,0.11859,0.1254,0.11563,0.1289,0.11749,0.12662,0.11443,0.12092,0.129  
41,0.12576,0.067726,0.068155,0.067723,0.067621,0.068186,0.067686,0.067  
596,0.067477,0.066998,0.068441,0.067195,0.067115,0.068058,0.06784,0.06  
729,0.067365,0.067512,0.067642,0.067846,0.067421,0.068083,0.12085,0.12  
622,0.12119,0.12481,0.13023,0.12571,0.12674,0.13495,0.13106,0.067457,0  
.068065,0.068131,0.067279,0.06799,0.068316,0.067269,0.06734,0.068098,0  
.068004,0.067893,0.067235,0.068062,0.067703,0.067522,0.0674,0.067695,0  
.068173,0.067494,0.067934,0.068051,0.067928,0.068036,0.066692,0.067633  
,0.13396,0.12603,0.12605,0.1262,0.067993,0.067153,0.067963,0.067444,0.  
067164,0.067664,0.067609,0.067687,0.067826,0.068234,0.067867,0.067466,  
0.067933,0.06808,0.06704,0.06769,0.067835,0.06755,0.067423,0.06772,0.0  
67302,0.067626,0.067717,0.067295,0.067523,0.067923,0.067545,0.06833,0.  
06688,0.067445,0.067124,0.067458,0.067763,0.068179,0.067471,0.068407,0  
.06759,0.067354,0.068064,0.06742,0.067385,0.068171,0.067548,0.06756,0.

06719,0.067511,0.067378,0.067632,0.067421,0.067552,0.067743,0.067522,0.067131,0.067651,0.067633,0.066748,0.067108,0.067723,0.067841,0.067516,0.068171,0.067522,0.067527,0.068038,0.067487,0.067739,0.067749,0.068062,0.067715,0.06818,0.067242,0.068017,0.067106,0.068311,0.067338,0.067742,0.067339,0.067268,0.068426,0.06827,0.068302,0.067867,0.067745,0.067534,0.06773,0.067464,0.06768,0.067728,0.067792,0.067959,0.067875,0.06829,0.06741,0.067101,0.067545,0.067868,0.067148,0.067154,0.06685,0.067453,0.068173,0.06728,0.068253,0.068047,0.06801,0.067457,0.067391,0.067373,0.067713,0.067475,0.06695,0.067922,0.068075,0.068517,0.067825,0.067423,0.067572,0.067233,0.068304,0.067214,0.067617,0.067474,0.067835,0.067859,0.067758,0.068027,0.067899,0.067567,0.067431,0.067783,0.068065,0.0691,0.067733,0.068237,0.068053,0.06735,0.067597,0.068074,0.068241,0.067463,0.067978,0.068682,0.068163,0.067804,0.067361,0.067411,0.068598,0.067602,0.066943,0.067977,0.067643,0.067214,0.067578,0.067933,0.06742,0.067654,0.066827,0.067955,0.067989,0.067733,0.067512,0.067941,0.068039,0.067402,0.067165,0.067029,0.067823,0.06743,0.067091,0.067065,0.067259,0.067377,0.066985,0.06696,0.068543,0.067867,0.067849,0.067668,0.067302,0.067394,0.067337,0.068294,0.067725,0.067402,0.066892,0.067525,0.067561,0.067469,0.067005,0.068153,0.068041,0.067792,0.067535,0.067524,0.067863

0.17088,0.17047,0.17044,0.17001,0.17113,0.17118,0.17008,0.16977,0.17058,0.17113,0.17041,0.17148,0.16931,0.1707,0.17032,0.17066,0.16975,0.17085,0.17042,0.17056,0.30137,0.26722,0.28184,0.29214,0.1705,0.17091,0.17081,0.17019,0.17078,0.17107,0.17121,0.16978,0.17045,0.17074,0.17103,0.17054,0.16959,0.17027,0.17046,0.43404,0.32848,0.28214,0.31519,0.2909,0.30604,0.30135,0.17034,0.17034,0.1701,0.17005,0.16935,0.1709,0.171,0.17029,0.16976,0.16942,0.17066,0.17161,0.17106,0.17019,0.16953,0.43146,0.43512,0.29106,0.3375,0.30524,0.30936,0.33214,0.34612,0.29206,0.3206,0.17005,0.16946,0.17037,0.17034,0.1711,0.17087,0.16976,0.17028,0.17112,0.17,0.17023,0.17089,0.17185,0.17044,0.17112,0.42784,0.43337,0.43681,0.3085,0.28656,0.31708,0.32861,0.27609,0.30219,0.29582,0.31907,0.30005,0.17067,0.16986,0.17016,0.17049,0.16983,0.17069,0.17079,0.1699,0.17026,0.17097,0.17026,0.16957,0.17044,0.16995,0.17137,0.17005,0.4379,0.43287,0.44,0.44145,0.30568,0.30386,0.30643,0.29826,0.32556,0.30062,0.30102,0.30205,0.32083,0.31168,0.17129,0.1709,0.17058,0.17127,0.17052,0.17011,0.17097,0.17035,0.17067,0.17015,0.17057,0.17049,0.17088,0.1698,0.17049,0.1699,0.41932,0.43969,0.43207,0.44673,0.43239,0.44476,0.3067,0.29364,0.28943,0.30778,0.29954,0.30275,0.30081,0.30567,0.30498,0.31808,0.17053,0.16952,0.1718,0.17178,0.1706,0.17019,0.17032,0.17029,0.17006,0.17001,0.1703,0.17071,0.17079,0.16971,0.17022,0.17171,0.1703,0.42315,0.43675,0.43507,0.4307,0.4359,0.43929,0.29936,0.31043,0.29789,0.30159,0.2824,0.3027,0.28863,0.24359,0.28914,0.31694,0.30251,0.16962,0.1703,0.17193,0.16983,0.17073,0.17022,0.17084,0.17116,0.17051,0.17019,0.16978,0.17008,0.17027,0.1144,0.09545,0.12636,0.17032,0.43134,0.44279,0.42522,0.44061,0.44702,0.43578,0.42742,0.31,0.30485,0.29971,0.28445,0.30105,0.30677,0.27938,0.30826,0.31675,0.31745,0.30831,0.17007,0.17077,0.17086,0.17114,0.17059,0.17009,0.17098,0.17101,0.17055,0.17115,0.17002,0.11281,0.10657,0.12355,0.09058,0.10731,0.11676,0.17053,0.44704,0.43367,0.43827,0.44304,0.43158,0.43215,0.43726,0.31058,0.31442,0.30788,0.30823,0.27405,0.28848,0.286,0.29452,0.32485,0.3391,0.29182,0.17121,0.17047,0.16994,0.17057,0.17029,0.17136,0.1692,0.17097,0.17051,0.10292,0.11564,0.11369,0.10632,0.12871,0.10795,0.11452,0.11453,0.12998,0.17024,0.4352,0

.43608,0.42927,0.43295,0.43481,0.43944,0.43923,0.34249,0.29918,0.30092  
,0.30037,0.3055,0.3185,0.30473,0.30426,0.30559,0.28743,0.29427,0.30373  
,0.17012,0.17075,0.16964,0.17052,0.17062,0.1702,0.12305,0.11238,0.1122  
4,0.11797,0.11515,0.11053,0.11801,0.11916,0.11822,0.11472,0.11388,0.11  
469,0.43509,0.43005,0.41978,0.43665,0.42339,0.43491,0.42586,0.2721,0.2  
7346,0.2687,0.30567,0.29873,0.30387,0.29857,0.30121,0.29784,0.29224,0.  
3012,0.33326,0.17075,0.1708,0.16985,0.12276,0.11626,0.11969,0.11394,0.  
10203,0.12871,0.10804,0.10641,0.11498,0.10996,0.11495,0.1151,0.11787,0  
.10524,0.11878,0.44071,0.4353,0.43711,0.43606,0.44046,0.42918,0.43648,  
0.43804,0.43185,0.30707,0.28883,0.30415,0.29707,0.27252,0.30168,0.3171  
,0.34333,0.30577,0.28792,0.28303,0.12101,0.099175,0.10966,0.11796,0.11  
137,0.11151,0.11318,0.11445,0.10941,0.11425,0.10927,0.11434,0.11625,0.  
11459,0.1148,0.11547,0.10885,0.10712,0.43235,0.4378,0.43435,0.43282,0.  
43861,0.44501,0.43373,0.42811,0.42949,0.29961,0.30383,0.22194,0.21458,  
0.23579,0.21789,0.22538,0.2225,0.22162,0.23126,0.21607,0.11437,0.11265  
,0.11706,0.11542,0.1184,0.10673,0.11484,0.099522,0.1202,0.10743,0.1237  
2,0.1164,0.11448,0.11153,0.11518,0.12291,0.11866,0.1132,0.43137,0.4300  
8,0.43069,0.42653,0.43052,0.43384,0.4319,0.43855,0.43736,0.25294,0.231  
17,0.22132,0.21359,0.22839,0.22229,0.21221,0.24014,0.22529,0.22076,0.2  
2487,0.12232,0.09905,0.11443,0.10362,0.12003,0.11579,0.11523,0.1,0.112  
59,0.11424,0.13541,0.1115,0.11485,0.11088,0.12754,0.1221,0.1155,0.1123  
9,0.44211,0.42765,0.43941,0.4447,0.4413,0.43472,0.4401,0.21043,0.22638  
,0.2471,0.22442,0.22584,0.25388,0.19196,0.21871,0.22383,0.22673,0.2121  
4,0.23064,0.20404,0.11546,0.11471,0.11244,0.11199,0.10926,0.1063,0.124  
,0.11983,0.11373,0.11371,0.11068,0.11483,0.11408,0.11499,0.12032,0.114  
76,0.10102,0.11233,0.43342,0.43974,0.43246,0.43257,0.44224,0.43623,0.2  
4779,0.25015,0.23499,0.25497,0.24484,0.21607,0.21156,0.2294,0.21489,0.  
21229,0.23296,0.22708,0.20117,0.23816,0.12984,0.11287,0.11511,0.12582,  
0.10478,0.12219,0.11486,0.11391,0.10979,0.11165,0.11411,0.11467,0.1235  
6,0.11293,0.1086,0.12262,0.12532,0.11498,0.43757,0.43524,0.43716,0.435  
81,0.43415,0.30157,0.24674,0.18786,0.23686,0.27525,0.25594,0.23173,0.1  
8611,0.22762,0.22698,0.22138,0.22521,0.22215,0.2199,0.245,0.11335,0.11  
56,0.1154,0.12308,0.11107,0.11502,0.11418,0.10544,0.12683,0.11571,0.12  
069,0.10646,0.10993,0.13074,0.1096,0.10774,0.11441,0.10681,0.43902,0.4  
2634,0.42115,0.20262,0.2546,0.24104,0.2144,0.24373,0.24694,0.23387,0.2  
5407,0.20635,0.21824,0.22774,0.22536,0.21956,0.19451,0.22305,0.20618,0  
.22989,0.10341,0.1037,0.11618,0.12399,0.11474,0.1146,0.11891,0.11474,0  
.10271,0.11641,0.10967,0.11661,0.1249,0.11464,0.11642,0.11552,0.11511,  
0.11393,0.43857,0.22818,0.24654,0.25354,0.24438,0.30232,0.19769,0.2482  
2,0.23883,0.28555,0.22146,0.18488,0.23464,0.20985,0.23331,0.21581,0.23  
141,0.18771,0.22107,0.11423,0.11358,0.10573,0.11422,0.11537,0.10904,0.  
10753,0.12455,0.127,0.10503,0.11497,0.11517,0.10812,0.11826,0.10482,0.  
12156,0.13302,0.05955,0.24415,0.2504,0.24772,0.24643,0.24822,0.25828,0  
.23778,0.28091,0.2074,0.27182,0.23314,0.22792,0.22458,0.22342,0.19806,  
0.21575,0.23327,0.21855,0.18626,0.11425,0.1109,0.12003,0.11382,0.12474  
,0.11198,0.11272,0.11446,0.11774,0.11417,0.1147,0.10346,0.097089,0.114  
39,0.11507,0.10729,0.1075,0.058589,0.29314,0.24988,0.24698,0.26558,0.2  
5442,0.25314,0.24131,0.25325,0.23918,0.24487,0.22324,0.24498,0.24023,0  
.221,0.24044,0.22367,0.19153,0.22572,0.10709,0.11081,0.10821,0.10812,0  
.1141,0.11479,0.11997,0.11489,0.11852,0.10865,0.14941,0.10787,0.12196,  
0.12037,0.11588,0.10134,0.11371,0.11492,0.059243,0.29029,0.2444,0.2130  
3,0.28893,0.2319,0.24978,0.23744,0.2354,0.26315,0.2603,0.22278,0.22517

,0.22768,0.2261,0.2277,0.24281,0.23813,0.22195,0.10638,0.1115,0.1251,0.11407,0.090451,0.12034,0.11445,0.12478,0.11008,0.12617,0.12038,0.12739,0.11816,0.10996,0.11426,0.10724,0.10597,0.059137,0.059261,0.058782,0.22895,0.23616,0.24009,0.25274,0.28213,0.23412,0.2438,0.25606,0.2502,0.21179,0.23852,0.22583,0.26107,0.23423,0.20938,0.11619,0.11442,0.11439,0.10707,0.1153,0.12109,0.10205,0.11566,0.13261,0.11435,0.11295,0.11399,0.11482,0.11437,0.13661,0.12543,0.11147,0.11262,0.058671,0.058695,0.058879,0.058466,0.20746,0.19948,0.3,0.26478,0.27031,0.24663,0.25199,0.14198,0.24756,0.24912,0.18582,0.22087,0.1143,0.11427,0.10807,0.10915,0.10922,0.11404,0.11461,0.11682,0.10961,0.10532,0.11371,0.12158,0.1053,0.11354,0.11475,0.11473,0.12008,0.10833,0.12482,0.11526,0.059,0.059218,0.05945,0.058722,0.059139,0.05881,0.28567,0.25657,0.24853,0.25631,0.26375,0.30763,0.24749,0.23632,0.115,0.12478,0.10339,0.12399,0.10473,0.11536,0.11512,0.10901,0.11941,0.11414,0.11638,0.11897,0.11248,0.11428,0.11519,0.11453,0.10961,0.11722,0.11246,0.13579,0.10641,0.11469,0.11471,0.058866,0.059853,0.05882,0.058704,0.058721,0.0587,0.25522,0.24218,0.23743,0.2747,0.24598,0.058367,0.058755,0.10742,0.11018,0.11069,0.11421,0.11078,0.11494,0.11508,0.11463,0.11227,0.11701,0.11638,0.11431,0.11102,0.103,0.12146,0.12199,0.12734,0.11528,0.12084,0.11462,0.11484,0.059112,0.059087,0.058954,0.059122,0.059156,0.05901,0.059756,0.059142,0.058928,0.058226,0.26981,0.2598,0.059039,0.059797,0.059145,0.058995,0.11304,0.11475,0.10887,0.12067,0.10769,0.12553,0.11566,0.1095,0.11386,0.11568,0.11644,0.1252,0.11982,0.11493,0.10926,0.10782,0.11505,0.11854,0.11204,0.059046,0.059025,0.059038,0.059302,0.05891,0.059034,0.05904,0.059177,0.058575,0.059275,0.058784,0.059452,0.05906,0.059119,0.059284,0.05904,0.059031,0.11443,0.11051,0.11432,0.11443,0.11084,0.115,0.11779,0.11258,0.11539,0.1267,0.10703,0.12103,0.11543,0.12087,0.12096,0.11437,0.058549,0.059542,0.05896,0.058301,0.058797,0.059153,0.059169,0.059372,0.058476,0.058693,0.059322,0.059029,0.058631,0.058803,0.05833,0.059215,0.059255,0.058907,0.058935,0.12162,0.11422,0.10607,0.10737,0.11369,0.10427,0.11694,0.10627,0.11466,0.10302,0.10895,0.11735,0.11394,0.058962,0.059105,0.058822,0.058689,0.059207,0.058742,0.058685,0.058712,0.058493,0.059551,0.058081,0.058456,0.059274,0.05921,0.058557,0.058554,0.058694,0.058946,0.059024,0.058958,0.05898,0.10954,0.11433,0.10954,0.11315,0.11832,0.11392,0.1149,0.1224,0.11908,0.058994,0.05947,0.0592,0.058648,0.05925,0.059479,0.058488,0.05862,0.059619,0.059289,0.05906,0.058398,0.059229,0.058931,0.058733,0.058529,0.058803,0.059636,0.058598,0.059116,0.059251,0.059119,0.059291,0.057888,0.058939,0.12209,0.11416,0.11393,0.11446,0.059032,0.058486,0.05906,0.05862,0.058396,0.059008,0.058823,0.058821,0.05923,0.059544,0.059155,0.058484,0.059542,0.059394,0.058161,0.059059,0.058959,0.058716,0.058778,0.059011,0.058736,0.059034,0.058912,0.058759,0.05873,0.059155,0.058756,0.059434,0.058153,0.058717,0.058453,0.058381,0.05899,0.059343,0.058856,0.059586,0.058735,0.058522,0.059353,0.058497,0.058418,0.059228,0.058715,0.058791,0.058433,0.058694,0.058907,0.058803,0.058728,0.058751,0.05894,0.058864,0.058589,0.058809,0.05887,0.05811,0.058487,0.058931,0.059107,0.058765,0.05906,0.059012,0.058895,0.059062,0.058519,0.059148,0.059067,0.059375,0.058978,0.059311,0.058494,0.059538,0.058246,0.059299,0.058623,0.058667,0.058865,0.05849,0.059381,0.059486,0.059429,0.059029,0.058944,0.058684,0.058703,0.058898,0.059105,0.059013,0.058983,0.05933,0.058757,0.059237,0.058675,0.05847,0.059005,0.059334,0.058364,0.058494,0.058286,0.058684,0.059346,0.058581,0.059641,0.059062,0.059199,0.058517,0.058794,0.058603,0.058878,0

.058603,0.058653,0.059132,0.058952,0.059301,0.059167,0.058625,0.058843  
,0.058261,0.059425,0.058516,0.059191,0.058872,0.058922,0.059102,0.0591  
49,0.059162,0.059387,0.059038,0.05873,0.058932,0.059166,0.059987,0.059  
054,0.060061,0.059105,0.058691,0.058965,0.059068,0.059206,0.058664,0.0  
58931,0.059369,0.059325,0.058466,0.058852,0.058719,0.059548,0.058952,0  
.058308,0.059058,0.059003,0.058102,0.058877,0.059033,0.058889,0.058829  
,0.057945,0.059171,0.059197,0.058688,0.05857,0.059107,0.059433,0.05871  
2,0.058135,0.05836,0.058898,0.058933,0.058278,0.058223,0.058421,0.0585  
18,0.058206,0.058397,0.059494,0.058901,0.058988,0.058973,0.058531,0.05  
8813,0.05848,0.059583,0.058854,0.05877,0.058238,0.058847,0.05923,0.058  
511,0.058299,0.05941,0.058861,0.058923,0.058647,0.058731,0.059037  
0.15778,0.15717,0.1576,0.15719,0.15817,0.15806,0.15761,0.15682,0.15702  
,0.15758,0.15719,0.15815,0.15643,0.1575,0.15711,0.15729,0.15674,0.1581  
8,0.15758,0.1568,0.28271,0.24954,0.26388,0.27139,0.15712,0.15814,0.157  
57,0.1572,0.15781,0.15772,0.15766,0.15676,0.15711,0.1577,0.15766,0.157  
4,0.15693,0.15713,0.15702,0.41497,0.30528,0.26351,0.2977,0.27108,0.287  
76,0.28172,0.15695,0.15708,0.15704,0.15674,0.15662,0.1581,0.15766,0.15  
721,0.15675,0.15596,0.1571,0.15827,0.15825,0.15736,0.15668,0.40678,0.4  
0207,0.27056,0.3152,0.28359,0.28895,0.31118,0.32515,0.27369,0.2989,0.1  
5701,0.1561,0.15746,0.15693,0.15806,0.15757,0.15676,0.15729,0.15826,0.  
15701,0.1573,0.15798,0.15869,0.15714,0.15772,0.4011,0.40731,0.41465,0.  
28933,0.26956,0.29567,0.30749,0.2568,0.28295,0.2756,0.29937,0.27974,0.  
15785,0.15695,0.15735,0.15672,0.15698,0.15738,0.15768,0.15731,0.1568,0  
.15756,0.157,0.15693,0.15757,0.15707,0.15778,0.15715,0.41178,0.41051,0  
.41613,0.4168,0.28625,0.2843,0.28809,0.27975,0.30604,0.28177,0.28062,0  
.28192,0.3004,0.29492,0.15811,0.15754,0.15743,0.15789,0.15755,0.15689,  
0.15817,0.15721,0.1577,0.157,0.15753,0.15729,0.15792,0.15669,0.15743,0  
.15698,0.39215,0.41814,0.40679,0.42188,0.4103,0.42023,0.28615,0.27306,  
0.27114,0.28712,0.28073,0.28383,0.2814,0.2848,0.28328,0.2981,0.15742,0  
.1564,0.1588,0.15844,0.15706,0.15727,0.1575,0.15722,0.15734,0.15683,0.  
15689,0.15771,0.15784,0.15645,0.15661,0.15862,0.15753,0.40023,0.41788,  
0.40759,0.41032,0.41737,0.41576,0.27933,0.28956,0.27919,0.28352,0.2640  
1,0.28247,0.26934,0.227,0.26965,0.29721,0.28205,0.15657,0.1574,0.15891  
,0.15681,0.15716,0.15684,0.15748,0.15771,0.15722,0.15703,0.15678,0.157  
34,0.15709,0.10476,0.087269,0.11618,0.1571,0.40519,0.41678,0.40175,0.4  
1186,0.41976,0.41099,0.40199,0.28849,0.28537,0.27994,0.26565,0.28093,0  
.28849,0.26102,0.28901,0.29711,0.29755,0.28968,0.15688,0.1575,0.15772,  
0.15798,0.15755,0.15671,0.15787,0.15776,0.15758,0.15787,0.15677,0.1034  
,0.09756,0.11341,0.082649,0.097998,0.10679,0.15743,0.42014,0.41119,0.4  
0988,0.41402,0.40423,0.40826,0.41115,0.28769,0.29378,0.29129,0.28678,0  
.25478,0.2685,0.26762,0.27459,0.30312,0.32126,0.27374,0.1576,0.15698,0  
.15735,0.15733,0.15699,0.15816,0.15634,0.15832,0.15719,0.094137,0.1059  
5,0.10434,0.097167,0.11826,0.098794,0.10495,0.10505,0.11951,0.15711,0.  
41075,0.41169,0.40163,0.40548,0.41293,0.41315,0.4116,0.32039,0.27869,0  
.28223,0.27958,0.28549,0.29641,0.28626,0.28505,0.28515,0.26855,0.27371  
,0.28337,0.15732,0.15771,0.15667,0.15734,0.15752,0.15736,0.11291,0.103  
12,0.10273,0.10824,0.10533,0.10116,0.10821,0.10931,0.10846,0.10484,0.1  
0424,0.1052,0.40655,0.40854,0.39645,0.41061,0.39859,0.41161,0.4033,0.2  
5285,0.25486,0.24881,0.28701,0.27757,0.28474,0.27914,0.28188,0.28081,0  
.27367,0.28167,0.31362,0.1579,0.15753,0.15683,0.11271,0.10687,0.10948,  
0.10462,0.093184,0.11833,0.098731,0.097549,0.10547,0.10078,0.10548,0.1  
0531,0.10817,0.096437,0.1091,0.41299,0.40918,0.40876,0.41539,0.41362,0

.40775,0.409,0.41407,0.40807,0.28523,0.26989,0.28523,0.27857,0.25256,0.28185,0.29817,0.32241,0.28437,0.26881,0.26376,0.11091,0.090429,0.10014,0.10801,0.10239,0.1023,0.10327,0.10494,0.10018,0.10444,0.099718,0.10449,0.10655,0.10458,0.10519,0.10594,0.099598,0.098243,0.40647,0.4117,0.41083,0.40898,0.41346,0.41824,0.40765,0.40364,0.40338,0.28145,0.28332,0.20536,0.19921,0.22069,0.20394,0.2112,0.20639,0.20741,0.21498,0.20219,0.10445,0.1028,0.10737,0.10583,0.10841,0.097792,0.10507,0.09104,0.11016,0.098275,0.11362,0.10676,0.10501,0.10224,0.10531,0.11252,0.10904,0.1037,0.40377,0.39935,0.40184,0.40469,0.40153,0.40807,0.40552,0.41542,0.40637,0.23802,0.2154,0.20724,0.19818,0.21399,0.20713,0.1978,0.22363,0.20952,0.20609,0.20871,0.11206,0.090722,0.10478,0.094395,0.10967,0.10619,0.10566,0.09115,0.10334,0.10468,0.12489,0.10228,0.1052,0.10171,0.11713,0.11225,0.10578,0.10283,0.41245,0.40562,0.41301,0.41397,0.4137,0.40825,0.41109,0.19643,0.21233,0.22982,0.20946,0.20932,0.2362,0.17781,0.20456,0.20831,0.20989,0.19706,0.21331,0.18939,0.10544,0.10535,0.103,0.10285,0.10017,0.097384,0.1138,0.10972,0.10431,0.10421,0.10119,0.1053,0.10413,0.10521,0.11045,0.10499,0.092147,0.10274,0.40935,0.4126,0.4077,0.40985,0.41469,0.40971,0.23145,0.23383,0.21895,0.23695,0.2284,0.2017,0.19906,0.21495,0.20109,0.19778,0.21805,0.21242,0.18759,0.22192,0.11903,0.10334,0.10538,0.11523,0.095892,0.11205,0.10491,0.10441,0.10067,0.10249,0.10444,0.10496,0.11367,0.10351,0.099582,0.11275,0.11465,0.10542,0.40839,0.40719,0.41348,0.41209,0.41014,0.28259,0.23119,0.17545,0.22143,0.25562,0.24017,0.21372,0.17236,0.21167,0.21294,0.20631,0.21094,0.20619,0.20615,0.22976,0.10387,0.10589,0.1058,0.11286,0.10184,0.10515,0.10462,0.096327,0.11641,0.10581,0.11134,0.0975,0.1004,0.12015,0.10021,0.098553,0.10498,0.097646,0.41102,0.4026,0.3965,0.18797,0.23738,0.22695,0.19941,0.23048,0.23056,0.21836,0.23875,0.19213,0.20282,0.21204,0.21009,0.20461,0.18122,0.20782,0.19046,0.21623,0.094123,0.095132,0.10671,0.11363,0.10552,0.1045,0.10921,0.10554,0.093723,0.10664,0.10075,0.10683,0.11447,0.10498,0.10691,0.10602,0.10558,0.10424,0.41658,0.2142,0.2312,0.23635,0.22935,0.28209,0.18452,0.23215,0.22321,0.26985,0.20603,0.17069,0.21939,0.1955,0.21629,0.20229,0.21604,0.17476,0.20611,0.10426,0.10418,0.096917,0.10469,0.10564,0.099421,0.098273,0.11442,0.11669,0.096286,0.10544,0.10565,0.09891,0.10831,0.096074,0.11161,0.12218,0.053269,0.22928,0.23358,0.23094,0.22946,0.23197,0.24225,0.223,0.26518,0.19678,0.25799,0.21789,0.21288,0.20907,0.20725,0.18406,0.20268,0.21748,0.20375,0.17283,0.10451,0.10151,0.11008,0.10376,0.11469,0.10253,0.10355,0.10487,0.10784,0.10469,0.10495,0.094521,0.088734,0.10511,0.10532,0.098132,0.098274,0.052551,0.27426,0.23749,0.22996,0.24672,0.23657,0.23915,0.2252,0.23666,0.22325,0.22784,0.20903,0.22816,0.22471,0.20694,0.22362,0.2075,0.17785,0.20936,0.098079,0.10129,0.099273,0.098339,0.10463,0.10514,0.10974,0.10503,0.10868,0.099441,0.13822,0.098474,0.11153,0.11045,0.10607,0.092575,0.1042,0.10496,0.052876,0.27326,0.22787,0.20022,0.27083,0.21705,0.23434,0.22256,0.21949,0.24733,0.24317,0.20802,0.20981,0.21197,0.21034,0.21336,0.2272,0.22183,0.20723,0.097077,0.10217,0.11469,0.10473,0.082102,0.11005,0.1049,0.11488,0.10077,0.11589,0.11063,0.11664,0.10845,0.10063,0.1047,0.098372,0.096951,0.052922,0.053013,0.052636,0.21255,0.21992,0.22425,0.23685,0.2644,0.22036,0.2315,0.24113,0.2342,0.19896,0.22205,0.21161,0.24176,0.21887,0.19481,0.10659,0.10475,0.10497,0.098059,0.10571,0.11156,0.093067,0.10577,0.122,0.10504,0.1034,0.10487,0.10499,0.10516,0.12591,0.11528,0.10192,0.10312,0.052664,0.05255,0.052776,0.051936,0.19262,0.18428,0.28191,0.24827,0.25252,0.23118,0.23764,0.13

081,0.23134,0.23376,0.17226,0.20546,0.10474,0.10438,0.098941,0.099673,  
0.10032,0.10443,0.10489,0.10726,0.10054,0.095912,0.1044,0.11153,0.0963  
23,0.10399,0.10481,0.10531,0.10999,0.099315,0.1143,0.10565,0.052811,0.  
052751,0.053275,0.052852,0.052714,0.052926,0.26941,0.23806,0.23201,0.2  
3828,0.24897,0.28931,0.23065,0.22174,0.10514,0.11443,0.094934,0.11382,  
0.095869,0.10551,0.10576,0.099614,0.10947,0.10465,0.10668,0.10927,0.10  
301,0.10438,0.1056,0.1053,0.10007,0.10707,0.10286,0.12474,0.097197,0.1  
0489,0.10495,0.052721,0.053892,0.052999,0.052414,0.052495,0.052677,0.2  
3865,0.2254,0.2225,0.25709,0.23159,0.052,0.052549,0.098277,0.10071,0.1  
0128,0.10435,0.10151,0.10532,0.10547,0.1051,0.10286,0.10698,0.10673,0.  
10456,0.10148,0.093895,0.11161,0.112,0.11696,0.10565,0.11086,0.10482,0  
.10536,0.052883,0.052908,0.05294,0.053015,0.053088,0.052803,0.05335,0.  
053168,0.052791,0.052388,0.25428,0.2426,0.053,0.053418,0.053014,0.0530  
13,0.10361,0.10547,0.099813,0.1105,0.098694,0.11522,0.10607,0.10009,0.  
10424,0.10618,0.1066,0.11491,0.11016,0.10503,0.1001,0.098738,0.1055,0.  
10862,0.10289,0.052738,0.053017,0.052814,0.053316,0.05315,0.053034,0.0  
53014,0.052972,0.052498,0.052989,0.05237,0.053249,0.052774,0.052816,0.  
053284,0.052909,0.052879,0.1048,0.10077,0.10466,0.10475,0.10148,0.1057  
6,0.10766,0.10334,0.10553,0.11627,0.097924,0.11071,0.10579,0.11083,0.1  
1081,0.10469,0.052374,0.053433,0.052987,0.052245,0.052565,0.053136,0.0  
53102,0.053372,0.052302,0.052691,0.053032,0.052996,0.052591,0.053012,0  
.05228,0.053145,0.052861,0.052669,0.052833,0.11145,0.10465,0.097074,0.  
098225,0.10394,0.095272,0.10763,0.097085,0.10492,0.094124,0.09933,0.10  
794,0.10444,0.053024,0.053018,0.052905,0.052549,0.053029,0.052538,0.05  
2755,0.052752,0.052398,0.05321,0.052209,0.052244,0.053266,0.053023,0.0  
52327,0.052532,0.052449,0.052878,0.052766,0.052697,0.05289,0.10041,0.1  
0502,0.10031,0.10352,0.10827,0.10474,0.10533,0.11226,0.10946,0.052842,  
0.053339,0.053225,0.052643,0.053431,0.053262,0.052557,0.052563,0.05340  
8,0.053027,0.05307,0.052602,0.053049,0.052641,0.052488,0.052444,0.0526  
53,0.053376,0.052374,0.053115,0.052962,0.053031,0.053046,0.051818,0.05  
3145,0.11207,0.10408,0.10457,0.10504,0.052938,0.052529,0.053044,0.0523  
1,0.052336,0.053189,0.052635,0.052714,0.052967,0.053463,0.052721,0.052  
651,0.053485,0.05328,0.052071,0.052999,0.052598,0.052767,0.052514,0.05  
3099,0.052486,0.052944,0.052903,0.052858,0.052332,0.052991,0.052467,0.  
053289,0.052199,0.052509,0.052643,0.052209,0.052859,0.053199,0.05288,0  
.053463,0.052787,0.052446,0.053049,0.052263,0.052285,0.052947,0.052623  
,0.052683,0.052129,0.052626,0.05281,0.052764,0.052606,0.052552,0.05265  
8,0.052686,0.052563,0.052957,0.052981,0.052124,0.052447,0.052652,0.052  
909,0.052558,0.052844,0.052894,0.052708,0.052858,0.052451,0.053082,0.0  
53144,0.053533,0.052652,0.053042,0.052487,0.053383,0.052262,0.053061,0  
.052711,0.052664,0.052921,0.052595,0.053321,0.05327,0.053266,0.052837,  
0.052726,0.052845,0.052573,0.052849,0.053011,0.053064,0.052764,0.05329  
3,0.052637,0.053007,0.052713,0.052213,0.052595,0.053297,0.052354,0.052  
464,0.051921,0.052746,0.053105,0.052589,0.05369,0.053023,0.053261,0.05  
2235,0.052626,0.052506,0.052959,0.052642,0.052934,0.053025,0.052775,0.  
052926,0.053247,0.052714,0.052508,0.05222,0.053154,0.052569,0.053029,0  
.052685,0.052868,0.052846,0.052889,0.05286,0.053173,0.053144,0.052726,  
0.052761,0.052924,0.053888,0.053202,0.053736,0.05287,0.052842,0.05295,  
0.052908,0.053001,0.052702,0.052555,0.052964,0.052911,0.052598,0.05273  
5,0.052606,0.053177,0.052702,0.052192,0.05304,0.052848,0.051859,0.0526  
93,0.052658,0.052722,0.052471,0.051614,0.053178,0.053206,0.052632,0.05  
2307,0.053023,0.053154,0.052581,0.052182,0.052189,0.052692,0.052553,0.

05211,0.052196,0.05223,0.052812,0.052155,0.051954,0.053172,0.052981,0.052961,0.053136,0.052224,0.0528,0.052423,0.053452,0.05291,0.052705,0.05238,0.052788,0.052821,0.052533,0.05235,0.053108,0.052629,0.052738,0.052642,0.052565,0.052876  
0.14644,0.14594,0.14613,0.14589,0.14719,0.14681,0.14617,0.14587,0.14596,0.1461,0.14615,0.14678,0.1456,0.14634,0.14591,0.14629,0.14559,0.14711,0.14612,0.14576,0.26807,0.2358,0.25023,0.25648,0.14605,0.14703,0.14649,0.14605,0.14633,0.14626,0.14589,0.14565,0.14577,0.14634,0.14628,0.14589,0.14583,0.14623,0.14595,0.39963,0.29358,0.24833,0.28409,0.25718,0.27332,0.268,0.14589,0.14598,0.14644,0.14565,0.14541,0.14653,0.14642,0.14623,0.14564,0.14485,0.14615,0.14679,0.14687,0.14567,0.14566,0.38707,0.38904,0.25658,0.30508,0.27044,0.27519,0.29609,0.30752,0.25939,0.28522,0.14543,0.14494,0.14624,0.14549,0.1468,0.14606,0.14557,0.14655,0.1474,0.14607,0.14598,0.14626,0.14733,0.14616,0.14665,0.38224,0.39303,0.39248,0.27849,0.2566,0.28206,0.2948,0.24458,0.26822,0.26195,0.28495,0.26604,0.14628,0.14594,0.14608,0.1454,0.14588,0.14617,0.14657,0.1459,0.14584,0.14617,0.14583,0.14587,0.14632,0.14601,0.14628,0.14566,0.39215,0.39635,0.39984,0.3978,0.27212,0.27015,0.27335,0.26368,0.29178,0.26733,0.2639,0.27015,0.28584,0.2783,0.14675,0.14638,0.14596,0.14656,0.14628,0.1455,0.14698,0.1458,0.14662,0.14616,0.1465,0.14666,0.14614,0.14565,0.14609,0.1462,0.36971,0.39645,0.38856,0.40695,0.40177,0.40327,0.27241,0.26098,0.25907,0.27334,0.26689,0.26958,0.26609,0.2688,0.26854,0.28563,0.1462,0.14548,0.14761,0.14695,0.14619,0.14617,0.14632,0.14634,0.14614,0.14534,0.14579,0.14643,0.14672,0.14553,0.14561,0.1472,0.14617,0.38319,0.40166,0.39137,0.39003,0.39964,0.39706,0.26345,0.27442,0.26526,0.26792,0.24947,0.26725,0.25669,0.21337,0.25462,0.28352,0.26778,0.14521,0.14619,0.14745,0.1456,0.14579,0.1454,0.14646,0.14587,0.14602,0.14611,0.14592,0.14575,0.14603,0.097107,0.080933,0.10727,0.14642,0.38866,0.40135,0.38673,0.39974,0.40319,0.3935,0.38402,0.27339,0.27117,0.26763,0.25188,0.26571,0.27557,0.24901,0.27521,0.28266,0.28357,0.27633,0.14558,0.146,0.14682,0.14638,0.14627,0.14578,0.14694,0.14612,0.14614,0.14663,0.14596,0.095669,0.090495,0.10541,0.076538,0.090519,0.09913,0.14605,0.40688,0.39109,0.39251,0.39949,0.38864,0.39554,0.39465,0.2739,0.27835,0.27571,0.27359,0.2405,0.25493,0.25491,0.2593,0.28743,0.31061,0.26005,0.14625,0.1458,0.14613,0.14573,0.14594,0.14673,0.14537,0.14703,0.14612,0.086922,0.098106,0.096659,0.089855,0.10973,0.091536,0.096787,0.097053,0.11101,0.14614,0.39096,0.39473,0.38641,0.38873,0.39927,0.39631,0.3949,0.30788,0.26596,0.26674,0.26582,0.27009,0.2848,0.27077,0.27216,0.27344,0.25672,0.26017,0.26718,0.14646,0.1467,0.14528,0.14617,0.14625,0.14605,0.10468,0.095406,0.095075,0.10036,0.097604,0.093638,0.10013,0.10137,0.10009,0.097232,0.096714,0.097552,0.39395,0.39556,0.38444,0.39703,0.38141,0.39339,0.38926,0.23865,0.24122,0.23571,0.275,0.26251,0.27048,0.26549,0.26685,0.26514,0.25709,0.26507,0.29777,0.14683,0.1461,0.14532,0.10428,0.099105,0.10153,0.096899,0.086459,0.10988,0.091559,0.090342,0.097745,0.093477,0.097958,0.09766,0.10023,0.089301,0.10086,0.39891,0.3889,0.39249,0.39442,0.39704,0.39377,0.39615,0.39728,0.39327,0.27175,0.25489,0.27243,0.26459,0.24155,0.26969,0.28226,0.30607,0.27184,0.25485,0.24907,0.10286,0.08384,0.0929,0.10052,0.094912,0.095228,0.095427,0.097278,0.093138,0.09675,0.092346,0.096946,0.098869,0.096997,0.097159,0.098264,0.092196,0.090782,0.38778,0.39436,0.39165,0.39437,0.39579,0.40094,0.39616,0.38462,0.39101,0.2651,0.27186,0.19538,0.18819,0.20982,0.19409,0.19884,0.19466,0.19655,0.20372,0.1922,0.096679,0.095325,0.10011,0.09



7849,0.10048,0.090706,0.096973,0.084127,0.10166,0.091011,0.1054,0.0986  
88,0.097612,0.0945,0.097033,0.10402,0.101,0.096134,0.38869,0.38761,0.3  
8934,0.38971,0.3828,0.38949,0.38808,0.40054,0.39309,0.22726,0.20615,0.  
19502,0.18819,0.20261,0.19676,0.18707,0.21195,0.19799,0.1955,0.19926,0.  
.10411,0.083911,0.096818,0.087164,0.10159,0.098202,0.097908,0.084409,0.  
.095758,0.097107,0.11608,0.09468,0.097359,0.094458,0.10829,0.10367,0.0  
98188,0.095239,0.39419,0.39069,0.39776,0.39891,0.39514,0.39031,0.3944,  
0.18733,0.20355,0.22053,0.19907,0.20044,0.22341,0.16901,0.19382,0.1965  
1,0.20082,0.18574,0.20356,0.17805,0.097416,0.097394,0.095656,0.095298,  
0.092848,0.090049,0.10565,0.10176,0.096773,0.096462,0.093661,0.097481,  
0.096616,0.097686,0.10276,0.097145,0.085423,0.094739,0.3947,0.39495,0.  
38952,0.39141,0.39299,0.39187,0.22364,0.22529,0.20725,0.22618,0.21801,  
0.19055,0.18979,0.20363,0.18935,0.18693,0.20558,0.20166,0.17886,0.2117  
2,0.11037,0.096035,0.097721,0.1064,0.08868,0.10367,0.097561,0.096544,0.  
.093348,0.095019,0.097364,0.09742,0.10563,0.095714,0.092136,0.10465,0.  
1063,0.097752,0.39323,0.39236,0.39508,0.40032,0.39008,0.27043,0.22049,  
0.16713,0.20908,0.2426,0.23086,0.20292,0.16229,0.20049,0.20204,0.19682  
,0.19993,0.19645,0.19683,0.21677,0.096003,0.098225,0.098227,0.10462,0.  
094376,0.097256,0.097013,0.089207,0.10766,0.098136,0.10314,0.090332,0.  
092943,0.11131,0.092579,0.091726,0.09708,0.090352,0.39461,0.38341,0.38  
511,0.17923,0.23054,0.21534,0.19044,0.22108,0.22186,0.20763,0.22715,0.  
18153,0.1925,0.20119,0.19961,0.19349,0.1718,0.19762,0.18153,0.20491,0.  
087152,0.088116,0.098841,0.10526,0.098088,0.09682,0.10112,0.097818,0.0  
86998,0.098806,0.093368,0.099242,0.10626,0.097204,0.099131,0.098283,0.  
09772,0.096421,0.40241,0.20276,0.22478,0.22501,0.21963,0.27028,0.17783  
,0.22386,0.21259,0.25592,0.19508,0.16118,0.20993,0.18571,0.20586,0.192  
38,0.20742,0.1645,0.19656,0.096604,0.096847,0.089607,0.097029,0.097712  
,0.092135,0.091113,0.10604,0.10846,0.089322,0.098164,0.097999,0.091571  
,0.10024,0.08892,0.1031,0.11309,0.048813,0.22136,0.22392,0.22359,0.215  
84,0.21993,0.23348,0.21335,0.25662,0.18804,0.25049,0.20543,0.2031,0.19  
912,0.19561,0.17298,0.19343,0.20839,0.19409,0.16179,0.096663,0.093961,  
0.10184,0.0961,0.10618,0.095238,0.096072,0.097131,0.099583,0.097014,0.  
096849,0.08771,0.08194,0.097405,0.097828,0.091016,0.091033,0.04837,0.2  
5953,0.22622,0.21944,0.23817,0.22691,0.22637,0.21427,0.22624,0.21297,0.  
.21731,0.1979,0.21726,0.21332,0.19625,0.21229,0.19649,0.16838,0.19942,  
0.090666,0.093789,0.091975,0.09142,0.097225,0.09713,0.10224,0.097294,0.  
.1011,0.09214,0.12832,0.091557,0.10328,0.10241,0.098151,0.085482,0.096  
89,0.097489,0.048503,0.26102,0.21764,0.18916,0.25929,0.20772,0.22274,0.  
.211,0.20803,0.23386,0.23247,0.19854,0.20001,0.20221,0.19899,0.20135,0.  
.21579,0.21132,0.1976,0.090107,0.094583,0.1062,0.097144,0.076041,0.102  
01,0.097148,0.10664,0.093076,0.10745,0.10283,0.10808,0.10047,0.09345,0.  
.096893,0.090998,0.089799,0.048846,0.048809,0.048188,0.2054,0.20991,0.  
21222,0.22639,0.25217,0.21259,0.21952,0.23038,0.22558,0.18835,0.21162,  
0.20071,0.22867,0.20706,0.18465,0.098663,0.09709,0.09733,0.090691,0.09  
8135,0.10316,0.086365,0.097898,0.11335,0.097385,0.095631,0.097402,0.09  
7377,0.097299,0.11693,0.10704,0.09458,0.095571,0.048422,0.048427,0.048  
564,0.047787,0.18324,0.17671,0.26631,0.23713,0.24416,0.21939,0.22559,0.  
.12399,0.22238,0.22191,0.16238,0.19568,0.096969,0.096754,0.091535,0.09  
2106,0.09282,0.096471,0.09721,0.099324,0.092964,0.088989,0.096914,0.10  
317,0.089308,0.096359,0.097305,0.097692,0.10163,0.092217,0.10607,0.098  
22,0.04857,0.048563,0.049005,0.048576,0.048766,0.048629,0.25723,0.2294  
1,0.21948,0.2265,0.23818,0.27847,0.22101,0.21195,0.097505,0.10638,0.08

7697,0.10543,0.088727,0.097553,0.098319,0.092568,0.10134,0.097109,0.09  
9162,0.10109,0.095617,0.097174,0.097942,0.097667,0.092667,0.099189,0.0  
95347,0.11612,0.09006,0.097148,0.09731,0.048751,0.049562,0.048844,0.04  
8271,0.048201,0.048775,0.22831,0.21489,0.21276,0.24375,0.22097,0.04770  
7,0.048465,0.09106,0.092858,0.093942,0.096655,0.094354,0.097804,0.0977  
04,0.097546,0.095543,0.099394,0.098537,0.097209,0.094013,0.086932,0.10  
335,0.10363,0.10839,0.097792,0.10262,0.097242,0.097816,0.048386,0.0486  
82,0.048609,0.048769,0.049139,0.048483,0.049138,0.048931,0.048567,0.04  
8359,0.24412,0.23191,0.048868,0.049328,0.048866,0.048718,0.096219,0.09  
7563,0.092389,0.10237,0.091428,0.10708,0.098057,0.092885,0.096284,0.09  
8869,0.09871,0.10651,0.10207,0.097399,0.092282,0.091357,0.097941,0.100  
61,0.095463,0.048618,0.048832,0.048595,0.048988,0.048959,0.048686,0.04  
8637,0.048908,0.048473,0.048952,0.048245,0.048949,0.048176,0.048658,0.  
048923,0.049041,0.048533,0.097024,0.093278,0.097154,0.097346,0.093837,  
0.097982,0.099686,0.09585,0.097779,0.10796,0.090506,0.1028,0.09817,0.1  
0265,0.10307,0.096964,0.048323,0.049318,0.048789,0.048261,0.048255,0.0  
48821,0.049066,0.048968,0.048213,0.048571,0.049071,0.048811,0.048307,0  
.048595,0.047924,0.048974,0.048743,0.048447,0.048472,0.1035,0.096865,0  
.089905,0.090747,0.096299,0.088323,0.099752,0.0902,0.097401,0.087404,0  
.091823,0.10024,0.096572,0.048856,0.048597,0.048942,0.048347,0.048757,  
0.048577,0.048442,0.048323,0.048043,0.048993,0.047927,0.047798,0.04898  
3,0.048848,0.04825,0.048413,0.048377,0.048723,0.048923,0.048855,0.0488  
2,0.093243,0.097285,0.092907,0.095972,0.10051,0.09701,0.097465,0.104,0  
.10137,0.048766,0.049057,0.049283,0.048439,0.049245,0.049085,0.04845,0  
.048309,0.049038,0.049082,0.048774,0.048649,0.048917,0.048554,0.048368  
,0.048177,0.048545,0.049169,0.048475,0.048862,0.048971,0.048652,0.0487  
65,0.04774,0.048659,0.10355,0.096167,0.097011,0.097306,0.048705,0.0483  
48,0.049136,0.048053,0.048374,0.048763,0.048656,0.048452,0.048621,0.04  
9665,0.048761,0.048696,0.049218,0.048941,0.048067,0.048753,0.048679,0.  
048838,0.048228,0.048641,0.048612,0.048627,0.048693,0.048954,0.047852,  
0.048524,0.048002,0.048958,0.048195,0.048145,0.04822,0.048022,0.048621  
,0.049209,0.048624,0.04929,0.048445,0.048469,0.048748,0.048081,0.04821  
7,0.048771,0.048415,0.048541,0.047999,0.048478,0.048545,0.048572,0.048  
294,0.048511,0.048509,0.048519,0.048235,0.048652,0.048685,0.048404,0.0  
4822,0.048641,0.048808,0.0484,0.048965,0.048694,0.048647,0.048684,0.04  
8443,0.048939,0.048921,0.049406,0.048347,0.048758,0.048264,0.049388,0.  
047796,0.048773,0.048698,0.048519,0.049045,0.048286,0.049183,0.049089,  
0.049156,0.048896,0.048483,0.048477,0.0486,0.048822,0.048682,0.04929,0  
.048594,0.048951,0.048503,0.048999,0.048591,0.048219,0.048648,0.049069  
,0.048434,0.048447,0.047711,0.048625,0.048764,0.048408,0.049517,0.0486  
28,0.049373,0.048188,0.048323,0.048508,0.049326,0.04849,0.048982,0.048  
872,0.048636,0.048745,0.049001,0.04879,0.048658,0.04824,0.048882,0.048  
733,0.048667,0.048902,0.048938,0.048891,0.048749,0.048815,0.049057,0.0  
49309,0.048692,0.048432,0.048648,0.0494,0.049203,0.049343,0.048562,0.0  
48714,0.048552,0.048591,0.048884,0.048173,0.048277,0.048966,0.049317,0  
.048583,0.048753,0.04835,0.048581,0.048739,0.048362,0.048849,0.048743,  
0.047682,0.04879,0.048656,0.048498,0.048039,0.047401,0.049171,0.048878  
,0.048784,0.047887,0.04887,0.048867,0.048361,0.048042,0.048239,0.04822  
3,0.048387,0.048078,0.048092,0.048013,0.048354,0.048215,0.048002,0.048  
836,0.048798,0.04837,0.049114,0.047849,0.048539,0.04828,0.048932,0.048  
623,0.048704,0.048177,0.048797,0.04849,0.048332,0.04837,0.04892,0.0487  
18,0.048325,0.048426,0.048292,0.049057

0.13726,0.13663,0.13643,0.13633,0.13806,0.13748,0.13712,0.13661,0.1368  
2,0.13692,0.13685,0.13749,0.13624,0.13721,0.13647,0.1373,0.13639,0.137  
45,0.13653,0.13658,0.25984,0.22659,0.24021,0.24695,0.13658,0.13745,0.1  
3727,0.13689,0.13727,0.13668,0.13666,0.13616,0.1367,0.13665,0.13702,0.  
1363,0.13645,0.13684,0.13653,0.38695,0.28008,0.23882,0.27511,0.24819,0  
.26167,0.25996,0.13603,0.13675,0.13694,0.13601,0.13595,0.13672,0.13709  
,0.13663,0.13638,0.13548,0.13676,0.13693,0.13772,0.13638,0.1361,0.3706  
3,0.38151,0.2464,0.29444,0.2575,0.26382,0.28555,0.29747,0.25028,0.2751  
5,0.13645,0.13577,0.13654,0.13624,0.13733,0.13686,0.13618,0.13749,0.13  
769,0.13713,0.13649,0.13717,0.13831,0.13702,0.13733,0.371,0.37966,0.37  
965,0.26828,0.24792,0.27134,0.28354,0.23598,0.25796,0.25407,0.27466,0.  
25501,0.13628,0.13663,0.13677,0.13613,0.13674,0.1366,0.13737,0.13637,0  
.13686,0.13688,0.13636,0.13663,0.13642,0.13674,0.13647,0.13626,0.37935  
,0.38867,0.39082,0.38623,0.25895,0.26016,0.26285,0.25172,0.27867,0.260  
17,0.25192,0.26126,0.27416,0.26887,0.13687,0.13754,0.13652,0.13674,0.1  
3615,0.13587,0.13758,0.13651,0.13741,0.13639,0.13759,0.13706,0.13702,0  
.13666,0.13704,0.13667,0.36165,0.38224,0.37597,0.39306,0.39132,0.39197  
,0.26327,0.25134,0.24815,0.26231,0.25384,0.26094,0.25589,0.25769,0.260  
57,0.27601,0.13658,0.13623,0.13787,0.1375,0.13656,0.13687,0.13696,0.13  
694,0.13698,0.13613,0.13628,0.13734,0.13772,0.1361,0.13614,0.13774,0.1  
3685,0.37307,0.38941,0.37664,0.3819,0.39299,0.38258,0.25254,0.26652,0.  
25669,0.25786,0.24029,0.25591,0.24889,0.20284,0.24518,0.27171,0.25909,  
0.13576,0.13662,0.13816,0.1362,0.13654,0.13599,0.13681,0.13637,0.13653  
,0.13693,0.13685,0.13639,0.13694,0.091284,0.075972,0.10032,0.13682,0.3  
8013,0.38977,0.37108,0.38763,0.394,0.38527,0.36875,0.26155,0.26294,0.2  
5792,0.24089,0.25735,0.26632,0.23764,0.26391,0.27217,0.2721,0.26608,0.  
13646,0.13668,0.13711,0.13654,0.13676,0.13679,0.13776,0.13663,0.13669,  
0.13726,0.1366,0.089579,0.084347,0.098723,0.071707,0.085283,0.092808,0  
.13683,0.39152,0.3763,0.3796,0.38619,0.37373,0.38658,0.38468,0.26585,0  
.26773,0.26294,0.26174,0.23045,0.24458,0.2448,0.25072,0.27768,0.29713,  
0.24838,0.13672,0.13622,0.13671,0.13607,0.13667,0.1374,0.13632,0.13731  
,0.1367,0.081672,0.091938,0.090654,0.084221,0.10254,0.085969,0.090576,  
0.090735,0.10415,0.13688,0.38588,0.38212,0.37616,0.3809,0.38724,0.3865  
6,0.38418,0.29701,0.25833,0.25518,0.25463,0.2612,0.27658,0.26091,0.262  
67,0.26205,0.24647,0.25113,0.25665,0.137,0.13751,0.13653,0.13729,0.136  
9,0.13653,0.098162,0.089104,0.089106,0.093758,0.091641,0.087549,0.0941  
43,0.095111,0.093586,0.091308,0.090586,0.091408,0.38104,0.38166,0.3786  
7,0.38586,0.37256,0.38607,0.38138,0.22801,0.23284,0.22705,0.26421,0.25  
218,0.25971,0.25394,0.25544,0.25599,0.24759,0.25511,0.2873,0.13737,0.1  
3646,0.13568,0.097792,0.092504,0.095239,0.09085,0.081119,0.10304,0.086  
199,0.084345,0.091975,0.087686,0.091972,0.091521,0.093928,0.083747,0.0  
94455,0.38612,0.37629,0.38507,0.3802,0.38642,0.38543,0.38882,0.38377,0  
.38507,0.26121,0.24557,0.26064,0.25534,0.23125,0.25936,0.27034,0.29567  
,0.26024,0.24655,0.24012,0.096392,0.078559,0.087212,0.094135,0.089045,  
0.089269,0.089267,0.091197,0.08737,0.090589,0.08617,0.090806,0.09305,0  
.090806,0.09101,0.092286,0.086615,0.085169,0.37831,0.38102,0.38157,0.3  
854,0.38204,0.39177,0.38697,0.37906,0.38341,0.25467,0.26062,0.18687,0.  
18103,0.20257,0.18585,0.18966,0.18713,0.18937,0.19596,0.18393,0.090928  
,0.089469,0.093806,0.091507,0.093942,0.085124,0.090712,0.079029,0.0953  
81,0.085728,0.098691,0.092547,0.091744,0.088645,0.091067,0.097325,0.09  
4919,0.089755,0.37872,0.37755,0.37547,0.37989,0.37161,0.37801,0.38036,  
0.3861,0.38302,0.22075,0.19853,0.18673,0.18106,0.19674,0.1881,0.1789,0

.20416,0.18985,0.18842,0.19142,0.097616,0.07895,0.090934,0.081518,0.09  
5148,0.092025,0.091836,0.079164,0.089918,0.091367,0.10878,0.088435,0.0  
9124,0.08832,0.10116,0.097326,0.091961,0.089222,0.3855,0.37778,0.38693  
,0.38721,0.38776,0.38237,0.38353,0.18083,0.19843,0.21327,0.1909,0.1899  
3,0.21522,0.16164,0.18745,0.19043,0.1932,0.17805,0.19653,0.17045,0.091  
433,0.091193,0.089511,0.089858,0.087539,0.084399,0.098773,0.094876,0.0  
90528,0.090531,0.087693,0.09129,0.090296,0.091374,0.096131,0.090834,0.  
079822,0.088549,0.38586,0.38152,0.37958,0.37833,0.37805,0.38243,0.2173  
,0.21819,0.20113,0.22099,0.21228,0.18412,0.18208,0.19584,0.18155,0.181  
01,0.19716,0.1947,0.17084,0.20268,0.10326,0.089784,0.091639,0.10011,0.  
082962,0.097303,0.091287,0.090372,0.087864,0.089343,0.091171,0.091022,  
0.099163,0.089577,0.086118,0.098274,0.099878,0.091702,0.38273,0.38285,  
0.38199,0.39039,0.38432,0.26249,0.21133,0.16081,0.20316,0.23426,0.2219  
8,0.19576,0.15499,0.19373,0.1936,0.18927,0.19121,0.18759,0.18921,0.208  
88,0.089511,0.091896,0.092043,0.098021,0.088688,0.090987,0.091213,0.08  
3821,0.10093,0.092258,0.096684,0.084724,0.086897,0.10455,0.0869,0.0860  
14,0.091053,0.084725,0.38055,0.37482,0.37594,0.17419,0.22342,0.21119,0  
.18426,0.21414,0.21708,0.202,0.2213,0.17442,0.18292,0.1938,0.19242,0.1  
8576,0.16504,0.18857,0.17447,0.19766,0.081798,0.082885,0.092602,0.0985  
58,0.091973,0.090836,0.094924,0.091716,0.081757,0.092525,0.08747,0.093  
072,0.099744,0.091189,0.093179,0.091965,0.091639,0.090525,0.39281,0.19  
581,0.21675,0.21806,0.21221,0.26096,0.17339,0.2171,0.2037,0.24749,0.18  
686,0.15359,0.20053,0.17728,0.19883,0.1845,0.19934,0.1576,0.18935,0.09  
0442,0.090905,0.084043,0.090845,0.091556,0.086586,0.085263,0.099394,0.  
10159,0.083697,0.091986,0.092059,0.085733,0.093861,0.083301,0.096533,0  
.10584,0.046114,0.2167,0.21721,0.21775,0.20965,0.21627,0.22496,0.20684  
,0.25076,0.18116,0.24448,0.19792,0.19508,0.19035,0.18833,0.16585,0.186  
75,0.20012,0.18651,0.1546,0.090673,0.08841,0.095735,0.090249,0.099603,  
0.089429,0.090127,0.091142,0.093042,0.090906,0.09065,0.082093,0.077103  
,0.091083,0.091502,0.085461,0.085349,0.045813,0.2519,0.22043,0.21401,0  
.23119,0.22317,0.21931,0.20529,0.21979,0.20474,0.21187,0.18923,0.20808  
,0.20654,0.18872,0.20493,0.18804,0.16115,0.1934,0.084868,0.08807,0.086  
016,0.085619,0.091165,0.090956,0.095662,0.091099,0.094745,0.086414,0.1  
2026,0.085934,0.096784,0.0962,0.091772,0.080295,0.091001,0.091322,0.04  
5777,0.25331,0.20846,0.18238,0.24955,0.20095,0.21578,0.20392,0.20087,0  
.22556,0.22711,0.19163,0.19329,0.19455,0.19136,0.19356,0.20733,0.20192  
,0.19072,0.084431,0.088572,0.099406,0.091322,0.071702,0.095109,0.09147  
,0.10012,0.087093,0.10069,0.096543,0.10112,0.093916,0.087593,0.090955,  
0.085223,0.083885,0.046092,0.046011,0.045364,0.19734,0.20479,0.20495,0  
.21895,0.24363,0.20746,0.21309,0.22179,0.21753,0.1804,0.20406,0.19225,  
0.22034,0.19957,0.17851,0.092383,0.090962,0.091257,0.08487,0.092173,0.  
096551,0.080794,0.091687,0.10619,0.091487,0.089803,0.091177,0.091345,0  
.091249,0.10895,0.099962,0.088816,0.089724,0.045437,0.045638,0.045804,  
0.045315,0.17653,0.16995,0.25934,0.23109,0.23669,0.21266,0.21908,0.119  
06,0.21542,0.21423,0.15508,0.18707,0.090854,0.090736,0.085724,0.086093  
,0.086811,0.090479,0.091198,0.09309,0.087008,0.083676,0.09089,0.096485  
,0.08369,0.090368,0.091159,0.091862,0.095112,0.086247,0.099379,0.09191  
1,0.045746,0.045881,0.046063,0.045583,0.045931,0.045955,0.24957,0.2223  
,0.21369,0.22305,0.22964,0.27221,0.21277,0.20743,0.091599,0.09992,0.08  
2391,0.098408,0.08299,0.091745,0.092104,0.086997,0.095121,0.091153,0.0  
93055,0.094557,0.089299,0.091307,0.091574,0.091445,0.08679,0.09262,0.0  
89335,0.10852,0.084715,0.090785,0.091358,0.045887,0.046312,0.046171,0.

045475,0.045647,0.045806,0.22148,0.20991,0.2039,0.23658,0.21428,0.0449  
32,0.045538,0.08556,0.087066,0.088041,0.090452,0.088594,0.091822,0.091  
545,0.09128,0.089841,0.093239,0.092563,0.090999,0.08777,0.081486,0.096  
855,0.097094,0.10189,0.091873,0.095771,0.090986,0.091848,0.045372,0.04  
5661,0.045807,0.045992,0.046199,0.045749,0.046086,0.046212,0.045706,0.  
045397,0.23415,0.22536,0.045938,0.046379,0.046019,0.045883,0.090147,0.  
091408,0.086805,0.09581,0.085574,0.10029,0.092253,0.08711,0.090102,0.0  
92313,0.092224,0.099851,0.095704,0.091254,0.086503,0.086051,0.091696,0  
.094286,0.089683,0.045708,0.045938,0.045579,0.046147,0.045963,0.045879  
,0.046049,0.0461,0.045604,0.045853,0.045131,0.046332,0.045255,0.045548  
,0.04577,0.046304,0.045558,0.091176,0.087307,0.09112,0.091199,0.087834  
,0.091433,0.093569,0.090205,0.091709,0.10101,0.084885,0.096703,0.09177  
7,0.09633,0.096534,0.091268,0.045557,0.046201,0.045831,0.045576,0.0455  
68,0.046063,0.046278,0.045924,0.045499,0.045271,0.046262,0.045971,0.04  
5655,0.045763,0.045165,0.046081,0.045843,0.045417,0.045461,0.097161,0.  
090875,0.084215,0.084918,0.090321,0.082623,0.093126,0.084922,0.091554,  
0.082173,0.086199,0.093925,0.090516,0.045957,0.045606,0.046308,0.04541  
4,0.046018,0.045641,0.045298,0.045529,0.045204,0.045815,0.045288,0.045  
084,0.046027,0.045855,0.045406,0.045702,0.045629,0.046105,0.046236,0.0  
46182,0.046151,0.087502,0.091364,0.087019,0.090066,0.094049,0.091303,0  
.091567,0.097593,0.095186,0.046076,0.046219,0.046033,0.045571,0.046318  
,0.046178,0.045459,0.045695,0.046246,0.046062,0.04576,0.045601,0.04593  
2,0.045737,0.045465,0.045355,0.045371,0.04629,0.045499,0.045977,0.0462  
36,0.045831,0.045661,0.044989,0.045654,0.097062,0.0902,0.091291,0.0911  
53,0.045782,0.045284,0.046382,0.045293,0.045459,0.045853,0.045572,0.04  
5615,0.045773,0.046832,0.045848,0.045975,0.046568,0.045703,0.045368,0.  
045476,0.04575,0.046084,0.045087,0.045517,0.045952,0.045841,0.045979,0  
.046396,0.045131,0.045562,0.04537,0.045975,0.045471,0.045325,0.045531,  
0.045059,0.045815,0.046225,0.045859,0.046068,0.045936,0.045733,0.04590  
2,0.045238,0.04537,0.045907,0.045707,0.045422,0.045097,0.04571,0.04577  
7,0.045963,0.04535,0.045452,0.04572,0.045805,0.045481,0.046237,0.04589  
3,0.045427,0.045557,0.046142,0.045803,0.045678,0.046257,0.045913,0.045  
388,0.045811,0.045416,0.04613,0.046004,0.046926,0.04541,0.045837,0.045  
474,0.046368,0.045063,0.045492,0.046035,0.045805,0.0461,0.045824,0.046  
151,0.046087,0.046133,0.046221,0.045614,0.045435,0.045806,0.046023,0.0  
45673,0.046141,0.046036,0.04611,0.045776,0.046241,0.046141,0.045541,0.  
045777,0.046112,0.045668,0.045924,0.045058,0.045887,0.04574,0.045809,0  
.046874,0.045636,0.046591,0.045169,0.045564,0.045649,0.046268,0.045964  
,0.046179,0.046081,0.045717,0.045668,0.046335,0.04595,0.045667,0.04544  
6,0.045794,0.045948,0.045758,0.046085,0.046164,0.045927,0.045695,0.045  
85,0.045962,0.046435,0.045749,0.046007,0.045917,0.046377,0.046369,0.04  
6245,0.045943,0.045852,0.045617,0.045733,0.045852,0.045513,0.045472,0.  
046078,0.046012,0.045794,0.046232,0.045415,0.045797,0.045971,0.045553,  
0.046221,0.045616,0.045062,0.045808,0.045804,0.045833,0.045279,0.04493  
,0.046256,0.045909,0.045839,0.045289,0.046027,0.046062,0.045635,0.0449  
62,0.045526,0.045375,0.045579,0.045624,0.045202,0.04545,0.045294,0.045  
348,0.045375,0.046283,0.046023,0.045558,0.046227,0.045232,0.045508,0.0  
45112,0.046269,0.045755,0.045583,0.045797,0.04587,0.045484,0.045516,0.  
045451,0.046078,0.045863,0.045631,0.045675,0.045373,0.046262  
0.12948,0.12892,0.12842,0.12857,0.13061,0.12993,0.12901,0.12918,0.1289  
7,0.12918,0.12912,0.13005,0.12867,0.12914,0.12864,0.12909,0.1287,0.130  
33,0.12877,0.12853,0.25315,0.21783,0.23328,0.23725,0.12929,0.1302,0.12

983,0.12889,0.12933,0.12885,0.1288,0.12824,0.12901,0.12875,0.12933,0.12866,0.12866,0.12845,0.12858,0.37688,0.27299,0.23197,0.26855,0.23851,0.25473,0.2517,0.12883,0.12875,0.12931,0.12862,0.12868,0.1284,0.12967,0.12887,0.12871,0.12812,0.1291,0.12921,0.12993,0.12904,0.12842,0.36453,0.37538,0.23936,0.28453,0.25222,0.25821,0.27784,0.28995,0.24212,0.26836,0.12889,0.12833,0.12889,0.1287,0.12938,0.12919,0.12843,0.12956,0.12939,0.12977,0.12894,0.12933,0.13048,0.1295,0.12948,0.36295,0.37094,0.36844,0.25786,0.23928,0.26287,0.27376,0.22617,0.25201,0.2463,0.2673,0.24741,0.12849,0.12891,0.12873,0.12903,0.12897,0.12872,0.13028,0.1289,0.12942,0.12916,0.12891,0.12926,0.12852,0.12897,0.12888,0.12886,0.37334,0.38268,0.38659,0.37838,0.24959,0.25362,0.25367,0.24353,0.27045,0.25301,0.24448,0.25461,0.26863,0.26031,0.12886,0.12974,0.12905,0.12889,0.12853,0.12795,0.12965,0.12868,0.12946,0.1286,0.12972,0.12915,0.12908,0.12871,0.12899,0.12894,0.35396,0.37669,0.3683,0.38564,0.38479,0.385,0.25478,0.24468,0.24074,0.25334,0.24629,0.2541,0.24984,0.24987,0.25307,0.2667,0.12897,0.12847,0.13024,0.12966,0.12866,0.1296,0.12971,0.12935,0.12954,0.12862,0.12884,0.12921,0.12959,0.1285,0.12847,0.12999,0.12883,0.36262,0.3821,0.37181,0.37855,0.38352,0.37832,0.2452,0.25792,0.25041,0.25066,0.23367,0.24686,0.2403,0.19524,0.23877,0.26377,0.25,0.12765,0.12846,0.13051,0.12845,0.12897,0.12784,0.12909,0.12837,0.1287,0.12868,0.12894,0.12859,0.12925,0.086468,0.072143,0.094812,0.1293,0.36848,0.38325,0.3671,0.37728,0.38737,0.37549,0.36138,0.25537,0.25677,0.24911,0.23404,0.24814,0.25538,0.22991,0.25565,0.26181,0.26656,0.25772,0.12886,0.1283,0.12895,0.12879,0.129,0.12914,0.13002,0.12891,0.12943,0.12967,0.12864,0.084864,0.079923,0.093141,0.068033,0.080835,0.087972,0.12886,0.38596,0.37062,0.37297,0.3785,0.37028,0.37643,0.37693,0.25673,0.26106,0.25658,0.25183,0.223,0.23895,0.23777,0.24413,0.27061,0.2903,0.24107,0.12893,0.12834,0.12899,0.1284,0.12932,0.12941,0.12875,0.12999,0.12859,0.077743,0.08712,0.085599,0.079839,0.097024,0.08129,0.086027,0.086021,0.098542,0.12963,0.37641,0.37202,0.36877,0.3748,0.38078,0.38176,0.38064,0.28928,0.25045,0.24659,0.24688,0.25426,0.26923,0.25386,0.25522,0.25349,0.24194,0.24381,0.24878,0.12927,0.12972,0.12918,0.12952,0.1288,0.12908,0.093002,0.084345,0.084654,0.088535,0.086525,0.082752,0.088998,0.090031,0.088608,0.086496,0.085926,0.086503,0.37207,0.37392,0.37196,0.37796,0.36408,0.38007,0.37928,0.22078,0.2235,0.21843,0.2553,0.24343,0.25317,0.24473,0.24629,0.24871,0.24027,0.24504,0.28171,0.12942,0.12848,0.12805,0.092657,0.087614,0.089808,0.086151,0.076586,0.097279,0.081528,0.079707,0.087091,0.083215,0.086927,0.086662,0.08853,0.079709,0.089522,0.38205,0.37248,0.37645,0.37125,0.38186,0.38013,0.38295,0.3739,0.37582,0.25615,0.23758,0.25222,0.24717,0.22505,0.25108,0.26315,0.28945,0.25299,0.23924,0.23427,0.091096,0.074549,0.082525,0.088946,0.084798,0.084648,0.084572,0.086492,0.082799,0.085817,0.082009,0.085838,0.087715,0.08622,0.086293,0.087554,0.082362,0.080869,0.37465,0.37515,0.37564,0.37772,0.37549,0.38277,0.37794,0.3717,0.37329,0.24639,0.25198,0.18048,0.17516,0.19582,0.18083,0.18483,0.18084,0.18244,0.18931,0.17807,0.086291,0.084974,0.088488,0.08659,0.088555,0.080494,0.086239,0.075508,0.090127,0.081286,0.093285,0.08732,0.086812,0.083813,0.08611,0.091843,0.089623,0.084963,0.37117,0.36923,0.36836,0.37555,0.36627,0.37163,0.37147,0.37991,0.37557,0.2179,0.19211,0.18163,0.17631,0.19117,0.18339,0.17406,0.19731,0.18572,0.18315,0.18585,0.092602,0.074527,0.086361,0.077558,0.090329,0.087057,0.087143,0.074978,0.085333,0.086415,0.10258,0.083948,0.086278,0.083847,0.095515,0.092577,0.086894,0.08477,0.37575,0.37196,0.37616,0.3

8024,0.37717,0.37338,0.37548,0.17805,0.194,0.20769,0.18704,0.18545,0.20938,0.15734,0.1817,0.18613,0.18896,0.17448,0.19156,0.16467,0.086575,0.086287,0.084645,0.085381,0.082885,0.080054,0.093234,0.090046,0.085515,0.085408,0.082839,0.086412,0.085348,0.086524,0.090923,0.086023,0.075907,0.084066,0.37351,0.36954,0.37251,0.3728,0.37176,0.37458,0.21048,0.21511,0.19853,0.21582,0.20873,0.17877,0.17699,0.1891,0.17732,0.17803,0.19079,0.19236,0.16559,0.19505,0.097631,0.085103,0.086781,0.094668,0.078552,0.091717,0.086846,0.085659,0.083615,0.084767,0.086628,0.086403,0.093811,0.084842,0.081683,0.093022,0.094388,0.086811,0.37466,0.37681,0.37201,0.38378,0.38049,0.25607,0.20658,0.15726,0.20033,0.23018,0.21737,0.18987,0.15024,0.18757,0.18953,0.18338,0.18363,0.18036,0.18341,0.20261,0.08471,0.086817,0.08693,0.092789,0.08365,0.086069,0.086348,0.079465,0.095672,0.087128,0.091714,0.080462,0.081991,0.098796,0.082554,0.081619,0.086028,0.079811,0.37142,0.37142,0.37254,0.16947,0.21928,0.20455,0.17925,0.20942,0.21453,0.19664,0.21678,0.16888,0.17741,0.1892,0.18544,0.18048,0.16043,0.18411,0.16812,0.19157,0.077677,0.078663,0.087764,0.093217,0.087183,0.08616,0.089995,0.086667,0.077548,0.087712,0.082603,0.087677,0.094357,0.086038,0.088419,0.087081,0.086789,0.085863,0.38393,0.19112,0.21117,0.2127,0.20722,0.2556,0.17045,0.21398,0.20246,0.24393,0.17899,0.1478,0.19385,0.17135,0.19273,0.17981,0.19234,0.15188,0.18367,0.085435,0.08625,0.079872,0.085745,0.086609,0.08193,0.080824,0.094019,0.096327,0.079671,0.087206,0.087063,0.081288,0.088771,0.079242,0.091282,0.099485,0.044296,0.21157,0.21107,0.21374,0.20708,0.21369,0.21984,0.20268,0.24809,0.17724,0.23681,0.19342,0.18959,0.18516,0.18281,0.16031,0.17981,0.19489,0.18055,0.14947,0.085839,0.083625,0.090341,0.085278,0.094395,0.084428,0.085644,0.086593,0.088023,0.085916,0.085951,0.077637,0.073066,0.086033,0.086491,0.081011,0.080757,0.043782,0.2458,0.21643,0.20835,0.22721,0.21668,0.21602,0.20037,0.21464,0.20018,0.20731,0.1841,0.20271,0.20068,0.18253,0.19743,0.18234,0.15612,0.18862,0.080732,0.0834,0.081216,0.081517,0.086517,0.086307,0.090606,0.086339,0.089531,0.082141,0.11391,0.081589,0.091527,0.090921,0.086961,0.076308,0.086187,0.085938,0.043787,0.24793,0.2045,0.17906,0.24263,0.19759,0.21079,0.19916,0.19538,0.21946,0.22257,0.18501,0.18816,0.18774,0.18567,0.18725,0.202,0.1967,0.1842,0.07996,0.084057,0.094003,0.086298,0.068496,0.090121,0.086658,0.0946,0.08239,0.095589,0.091356,0.095322,0.08884,0.083084,0.086122,0.081169,0.079708,0.043809,0.044436,0.043536,0.19173,0.19806,0.20032,0.21239,0.23714,0.20479,0.2128,0.21831,0.21399,0.17367,0.19778,0.18622,0.21472,0.1956,0.17168,0.087173,0.086055,0.086135,0.0801,0.087103,0.091652,0.076751,0.086628,0.10047,0.086199,0.084995,0.08658,0.086777,0.086204,0.10283,0.09477,0.083993,0.085037,0.043592,0.043851,0.044019,0.043348,0.17154,0.1664,0.25185,0.22431,0.23043,0.20737,0.21339,0.1161,0.20973,0.20859,0.1505,0.18159,0.086146,0.086223,0.080938,0.081371,0.082543,0.085287,0.086359,0.088451,0.082961,0.07944,0.085876,0.091346,0.079117,0.085655,0.086228,0.086916,0.089733,0.081735,0.094014,0.086872,0.043833,0.044174,0.044177,0.04385,0.043993,0.044048,0.24601,0.21542,0.20847,0.21638,0.22657,0.2641,0.20891,0.20138,0.086758,0.094568,0.078216,0.093655,0.078402,0.086631,0.087288,0.082509,0.089966,0.086271,0.088063,0.08956,0.084669,0.086046,0.086622,0.08639,0.082438,0.08768,0.084371,0.10217,0.080221,0.086146,0.086513,0.043949,0.044291,0.044163,0.043746,0.043763,0.044038,0.21899,0.20434,0.20132,0.23082,0.21179,0.04321,0.043824,0.081053,0.0828,0.083317,0.085462,0.083756,0.08679,0.086557,0.086288,0.084959,0.088384,0.088006,0.086144,0.083308,0.077203,0.09140

4, 0.092163, 0.096074, 0.087327, 0.09079, 0.085932, 0.087429, 0.043442, 0.043258, 0.043902, 0.0443, 0.044336, 0.043861, 0.044031, 0.044409, 0.043726, 0.043274, 0.22865, 0.22159, 0.043896, 0.04433, 0.044119, 0.043645, 0.085456, 0.086635, 0.082432, 0.090738, 0.081365, 0.094609, 0.087176, 0.082386, 0.085544, 0.086991, 0.087215, 0.09434, 0.090787, 0.086475, 0.081607, 0.081582, 0.086955, 0.089107, 0.084855, 0.043996, 0.044043, 0.043568, 0.044305, 0.044206, 0.044177, 0.044058, 0.044356, 0.043663, 0.044026, 0.043706, 0.044424, 0.043475, 0.043755, 0.043846, 0.044178, 0.043651, 0.086114, 0.082699, 0.086081, 0.086428, 0.083188, 0.086472, 0.088486, 0.085505, 0.086863, 0.095746, 0.080362, 0.091408, 0.087112, 0.090988, 0.091241, 0.086327, 0.043739, 0.044401, 0.04395, 0.043527, 0.043689, 0.044037, 0.044273, 0.043909, 0.043728, 0.043306, 0.044574, 0.043925, 0.043765, 0.04361, 0.043325, 0.043962, 0.043765, 0.043383, 0.04361, 0.092007, 0.086157, 0.079717, 0.080527, 0.085321, 0.07823, 0.088318, 0.080286, 0.086878, 0.077934, 0.081783, 0.089067, 0.085823, 0.04404, 0.043656, 0.044274, 0.043643, 0.044159, 0.043819, 0.043115, 0.043917, 0.043072, 0.043871, 0.043544, 0.043288, 0.044069, 0.043948, 0.043377, 0.043532, 0.043611, 0.043887, 0.044403, 0.044118, 0.043841, 0.082994, 0.08657, 0.082738, 0.085658, 0.08917, 0.086366, 0.086762, 0.092264, 0.09039, 0.043872, 0.044434, 0.043713, 0.043894, 0.044311, 0.044615, 0.043717, 0.043841, 0.044458, 0.044212, 0.043879, 0.043672, 0.044504, 0.043962, 0.04369, 0.043419, 0.043208, 0.044242, 0.043549, 0.04425, 0.044239, 0.043809, 0.043728, 0.042941, 0.04391, 0.092198, 0.085077, 0.086282, 0.086672, 0.044154, 0.043538, 0.044453, 0.043576, 0.043572, 0.043781, 0.043301, 0.043665, 0.044031, 0.044655, 0.044005, 0.044052, 0.044609, 0.04382, 0.043331, 0.04379, 0.043697, 0.04396, 0.043264, 0.043801, 0.044169, 0.044105, 0.044236, 0.044412, 0.043592, 0.043918, 0.04349, 0.044243, 0.043554, 0.043299, 0.043703, 0.042971, 0.043728, 0.044773, 0.04386, 0.043931, 0.043876, 0.044202, 0.043915, 0.043295, 0.043362, 0.044021, 0.043891, 0.043459, 0.043435, 0.043549, 0.043676, 0.043826, 0.043519, 0.043249, 0.043885, 0.043943, 0.043436, 0.044102, 0.044162, 0.043866, 0.043615, 0.043969, 0.044097, 0.043834, 0.044272, 0.044099, 0.043286, 0.043843, 0.043665, 0.04393, 0.043948, 0.044998, 0.043513, 0.044084, 0.043712, 0.044173, 0.043156, 0.04385, 0.0439, 0.043717, 0.044174, 0.044016, 0.044161, 0.043958, 0.044176, 0.044453, 0.043836, 0.043366, 0.043744, 0.044408, 0.043869, 0.044187, 0.043727, 0.044126, 0.043746, 0.04446, 0.044237, 0.043367, 0.04401, 0.044216, 0.043461, 0.044171, 0.043373, 0.044002, 0.04378, 0.043715, 0.044677, 0.043536, 0.04437, 0.043273, 0.043793, 0.043464, 0.044329, 0.043845, 0.044321, 0.044169, 0.043756, 0.04364, 0.044334, 0.043964, 0.043665, 0.043651, 0.04417, 0.044073, 0.043855, 0.044017, 0.044048, 0.044265, 0.043907, 0.043937, 0.044279, 0.044552, 0.043912, 0.04391, 0.043747, 0.044469, 0.044469, 0.043927, 0.043755, 0.043927, 0.043671, 0.043892, 0.044016, 0.043714, 0.043604, 0.043899, 0.044095, 0.044112, 0.044223, 0.043529, 0.043879, 0.043888, 0.044057, 0.044335, 0.043652, 0.043125, 0.043952, 0.043902, 0.044, 0.043496, 0.043092, 0.044411, 0.044066, 0.043925, 0.043453, 0.044241, 0.044155, 0.043487, 0.043392, 0.043651, 0.043456, 0.043425, 0.043826, 0.043407, 0.043661, 0.043264, 0.043692, 0.043262, 0.044623, 0.044074, 0.043775, 0.0443, 0.043049, 0.043503, 0.043237, 0.044437, 0.043729, 0.043688, 0.043936, 0.044327, 0.043546, 0.043867, 0.043298, 0.043678, 0.044051, 0.043781, 0.043901, 0.043593, 0.044258  
0.12322, 0.1225, 0.12196, 0.12268, 0.12468, 0.12318, 0.12271, 0.12267, 0.1226, 0.12268, 0.12271, 0.12323, 0.1222, 0.12275, 0.12242, 0.12311, 0.12232, 0.12413, 0.12292, 0.12257, 0.2474, 0.21165, 0.22677, 0.23082, 0.12319, 0.12363, 0.1232, 0.12227, 0.12306, 0.12266, 0.12218, 0.12186, 0.12271, 0.12245, 0.12286, 0.1223, 0.12242, 0.12183, 0.12215, 0.37566, 0.26718, 0.22617, 0.26212, 0.23343, 0.24797, 0.24584, 0.12276, 0.12217, 0.12298, 0.12269, 0.12195, 0.12241, 0.12371, 0.



12216,0.12252,0.12162,0.12267,0.12281,0.12384,0.12256,0.12219,0.35582,  
0.37136,0.23481,0.2791,0.24464,0.25145,0.27317,0.28404,0.23686,0.26261  
,0.1227,0.12228,0.12284,0.12261,0.12345,0.12264,0.12232,0.1229,0.12293  
,0.1234,0.12254,0.12268,0.12373,0.12277,0.12323,0.35999,0.36528,0.3603  
6,0.25252,0.23173,0.25768,0.27116,0.21965,0.24531,0.24047,0.26073,0.24  
273,0.12211,0.1228,0.12247,0.1228,0.12274,0.12202,0.124,0.12259,0.123,  
0.12267,0.122,0.12303,0.12203,0.12278,0.12304,0.12251,0.36889,0.37546,  
0.38404,0.37414,0.24365,0.24849,0.24881,0.23891,0.26685,0.24575,0.2376  
6,0.24881,0.26498,0.25377,0.12258,0.12321,0.12278,0.12219,0.12255,0.12  
144,0.12298,0.12233,0.12294,0.12199,0.12348,0.12253,0.12286,0.12254,0.  
12298,0.12283,0.35332,0.37149,0.36567,0.37776,0.3762,0.37823,0.24829,0  
.23637,0.23569,0.24737,0.23967,0.25054,0.24375,0.24633,0.24914,0.26355  
,0.12222,0.12255,0.1237,0.12344,0.12263,0.12284,0.12314,0.12293,0.1232  
5,0.12236,0.12241,0.12273,0.12359,0.12238,0.12223,0.124,0.12241,0.3559  
7,0.3764,0.36488,0.37156,0.37591,0.37279,0.23828,0.25252,0.24545,0.243  
08,0.22903,0.24089,0.23309,0.18935,0.23607,0.25866,0.2448,0.12154,0.12  
23,0.12384,0.1217,0.12226,0.12133,0.12271,0.12214,0.12265,0.12242,0.12  
319,0.12224,0.12278,0.082936,0.06925,0.090573,0.12299,0.36512,0.38046,  
0.36553,0.37067,0.37749,0.37402,0.35446,0.25023,0.24969,0.24274,0.2301  
4,0.24303,0.24968,0.22356,0.24791,0.25582,0.26132,0.25302,0.12213,0.12  
234,0.12214,0.12237,0.12264,0.12253,0.12369,0.12267,0.12282,0.12348,0.  
12203,0.081192,0.076483,0.089042,0.065176,0.077501,0.083707,0.1227,0.3  
8079,0.36859,0.37162,0.37214,0.36831,0.36915,0.37339,0.25199,0.25597,0  
.24985,0.24561,0.21717,0.23526,0.23106,0.23879,0.26506,0.28717,0.23532  
,0.12237,0.12224,0.12288,0.12178,0.12298,0.12337,0.12212,0.1235,0.1221  
4,0.074446,0.08341,0.081682,0.076389,0.092261,0.078111,0.0823,0.082344  
,0.094053,0.1232,0.36712,0.36874,0.36314,0.36908,0.37477,0.37801,0.375  
24,0.28727,0.24498,0.23988,0.24243,0.24621,0.26305,0.24788,0.25052,0.2  
4865,0.23599,0.23982,0.24496,0.12262,0.12353,0.12297,0.12301,0.12274,0  
.12292,0.088762,0.080441,0.080854,0.084476,0.082626,0.078974,0.085148,  
0.086473,0.084423,0.082702,0.081973,0.082858,0.36517,0.36469,0.36585,0  
.37326,0.35574,0.37151,0.37342,0.21433,0.21696,0.21294,0.25101,0.23823  
,0.24624,0.23917,0.23959,0.24205,0.23428,0.24078,0.27209,0.12272,0.122  
14,0.12169,0.088453,0.083751,0.08617,0.082251,0.073296,0.092657,0.0779  
06,0.076297,0.083344,0.079549,0.083365,0.082879,0.084712,0.076166,0.08  
5859,0.37612,0.36209,0.37163,0.36278,0.3779,0.37601,0.37923,0.36955,0.  
36948,0.25067,0.23147,0.24405,0.24051,0.22144,0.24471,0.25927,0.28443,  
0.2467,0.23336,0.22875,0.087565,0.071238,0.078815,0.085268,0.081432,0.  
081105,0.080449,0.082816,0.079255,0.082024,0.078498,0.082122,0.083674,  
0.082731,0.082728,0.083758,0.078792,0.077269,0.36941,0.37109,0.37214,0  
.37261,0.37045,0.38098,0.37563,0.37205,0.37097,0.24172,0.24286,0.17635  
,0.17036,0.19075,0.17923,0.18047,0.1758,0.17838,0.18477,0.17482,0.0825  
19,0.081409,0.084439,0.082804,0.084665,0.077203,0.082453,0.072162,0.08  
5957,0.077628,0.088982,0.083354,0.082904,0.080054,0.082277,0.08774,0.0  
85306,0.081237,0.35996,0.36176,0.36574,0.36931,0.36581,0.36688,0.36894  
,0.3733,0.37105,0.21324,0.18844,0.17789,0.17346,0.18585,0.18014,0.1711  
7,0.19238,0.18237,0.17866,0.18247,0.088568,0.071743,0.08279,0.074275,0  
.086221,0.083077,0.083281,0.071794,0.081457,0.08273,0.098004,0.080574,  
0.08281,0.079678,0.091172,0.088262,0.083168,0.081007,0.3683,0.36962,0.  
37048,0.3772,0.37151,0.37073,0.36788,0.17544,0.19012,0.20504,0.18214,0  
.18139,0.2038,0.15327,0.17648,0.18313,0.18364,0.17066,0.18558,0.16137,  
0.082613,0.082013,0.080658,0.081723,0.079455,0.076303,0.089083,0.08581

7,0.081521,0.081614,0.079483,0.082687,0.081328,0.08265,0.08675,0.08213  
9,0.072574,0.080108,0.36522,0.36689,0.36616,0.37187,0.36622,0.36884,0.  
20755,0.21132,0.19626,0.21201,0.20652,0.17245,0.17332,0.18481,0.17293,  
0.17421,0.18673,0.18908,0.162,0.19083,0.09332,0.081411,0.083051,0.0901  
42,0.075016,0.08746,0.082974,0.082089,0.079896,0.081111,0.082871,0.082  
506,0.089749,0.080943,0.078316,0.08861,0.089717,0.082965,0.36816,0.373  
55,0.36187,0.3754,0.37572,0.25099,0.20511,0.15555,0.19796,0.22491,0.21  
291,0.1857,0.14594,0.18385,0.18372,0.17893,0.17949,0.17648,0.17845,0.1  
9799,0.080934,0.082699,0.083144,0.088632,0.07974,0.082479,0.082512,0.0  
76069,0.091196,0.083164,0.087728,0.076501,0.078468,0.094049,0.079079,0  
.078005,0.0823,0.076171,0.36556,0.36727,0.36871,0.16509,0.21407,0.2021  
2,0.17542,0.2069,0.20832,0.19424,0.21116,0.16403,0.17167,0.18593,0.180  
68,0.17642,0.15603,0.18102,0.16393,0.18792,0.074251,0.07551,0.083953,0  
.089141,0.083124,0.082935,0.085844,0.082579,0.074557,0.083837,0.07923,  
0.084175,0.090106,0.082162,0.084224,0.083351,0.082887,0.08215,0.37879,  
0.18898,0.20786,0.21089,0.20368,0.25175,0.16714,0.21113,0.20015,0.2393  
3,0.17306,0.14331,0.18739,0.16658,0.18979,0.17355,0.18683,0.14836,0.17  
897,0.081874,0.082207,0.076673,0.081931,0.082686,0.078556,0.077258,0.0  
89701,0.091719,0.075968,0.083478,0.083093,0.077962,0.084935,0.075705,0  
.08707,0.095238,0.042635,0.20752,0.20743,0.21114,0.204,0.20863,0.2135,  
0.19892,0.24377,0.17573,0.23524,0.19151,0.18652,0.18107,0.17858,0.1560  
6,0.17682,0.18899,0.17692,0.14563,0.08212,0.079933,0.085906,0.081282,0  
.090584,0.081086,0.082052,0.083138,0.084283,0.082425,0.082167,0.0744,0  
.070015,0.082139,0.082538,0.077458,0.077253,0.042545,0.24368,0.21209,0  
.20728,0.22342,0.21397,0.2095,0.19651,0.21245,0.19757,0.20587,0.1809,0  
.19796,0.1972,0.17872,0.19409,0.17772,0.15334,0.18623,0.07739,0.079316  
,0.077595,0.077579,0.082686,0.082146,0.08678,0.082642,0.085572,0.07868  
9,0.10866,0.077366,0.086787,0.087122,0.083181,0.072939,0.08248,0.08199  
2,0.043053,0.24381,0.20032,0.17457,0.24167,0.1938,0.2081,0.19652,0.193  
33,0.21643,0.22,0.18005,0.1842,0.18373,0.18226,0.18288,0.196,0.19196,0  
.18076,0.07606,0.080245,0.089673,0.082669,0.065401,0.085774,0.082894,0  
.090502,0.07876,0.09134,0.087009,0.091002,0.085279,0.079672,0.082472,0  
.077512,0.076204,0.04229,0.043196,0.042128,0.18921,0.19632,0.19814,0.2  
1163,0.23543,0.20233,0.20799,0.21772,0.21241,0.17039,0.19464,0.18194,0  
.20891,0.18996,0.16694,0.083203,0.082376,0.082792,0.076734,0.083108,0.  
087728,0.073518,0.082639,0.095717,0.082692,0.081495,0.083207,0.082652,  
0.081915,0.097951,0.090249,0.080315,0.081402,0.042019,0.042627,0.04267  
8,0.042476,0.16777,0.16324,0.25066,0.22302,0.22466,0.2052,0.21,0.11479  
,0.20316,0.20396,0.14511,0.17795,0.082691,0.082272,0.077446,0.077917,0  
.078796,0.081411,0.082508,0.08461,0.079652,0.076045,0.082022,0.087239,  
0.075697,0.081985,0.082766,0.083159,0.085834,0.077995,0.089834,0.08303  
2,0.04252,0.042528,0.042742,0.042578,0.042466,0.04276,0.24321,0.21107,  
0.20693,0.21497,0.2216,0.26055,0.20728,0.20075,0.082936,0.090223,0.074  
831,0.089471,0.075305,0.082968,0.083454,0.079208,0.086021,0.082252,0.0  
84239,0.085385,0.080721,0.082312,0.082739,0.082668,0.078604,0.083744,0  
.080536,0.097424,0.07687,0.08231,0.082624,0.042718,0.042945,0.042836,0  
.042171,0.042657,0.042315,0.21485,0.20094,0.19887,0.22632,0.20905,0.04  
2063,0.042142,0.077284,0.079382,0.079801,0.08179,0.080195,0.083225,0.0  
82701,0.081938,0.081065,0.084643,0.084118,0.08236,0.079509,0.074136,0.  
087514,0.087923,0.091665,0.083429,0.086894,0.082186,0.083692,0.041874,  
0.041818,0.042474,0.043308,0.043154,0.042529,0.04284,0.04305,0.042328,  
0.04253,0.22375,0.21944,0.04241,0.042813,0.042787,0.042457,0.081413,0.

08275,0.078496,0.086433,0.077887,0.090277,0.083187,0.078767,0.081873,0.083155,0.083263,0.089841,0.08653,0.082568,0.078548,0.078129,0.082896,0.085361,0.081339,0.042659,0.042764,0.042339,0.043018,0.042632,0.042855,0.042991,0.043109,0.042427,0.042639,0.04255,0.043174,0.04206,0.042468,0.042381,0.042864,0.042549,0.082045,0.079111,0.08196,0.082721,0.079549,0.082317,0.084142,0.081848,0.082709,0.09148,0.077356,0.087242,0.083235,0.086996,0.086938,0.082469,0.042303,0.0434,0.04241,0.042649,0.042286,0.042832,0.042982,0.042629,0.042414,0.042128,0.04311,0.042535,0.042511,0.042314,0.042135,0.042453,0.042302,0.042036,0.042606,0.088011,0.082242,0.076608,0.07737,0.081716,0.074913,0.084458,0.076787,0.082646,0.074609,0.07808,0.085072,0.081993,0.042795,0.042257,0.042979,0.042166,0.042643,0.042632,0.041768,0.042453,0.041903,0.042526,0.042447,0.041666,0.042831,0.042114,0.042045,0.042211,0.042493,0.04254,0.042712,0.042712,0.042477,0.079509,0.082935,0.079309,0.081726,0.085303,0.082603,0.082765,0.088045,0.08641,0.042421,0.042988,0.042264,0.042401,0.042746,0.043257,0.042442,0.042779,0.042916,0.042792,0.04248,0.042447,0.043075,0.042421,0.042395,0.042248,0.041833,0.042885,0.042466,0.043066,0.043014,0.042699,0.041967,0.041357,0.042359,0.087895,0.08105,0.082275,0.082888,0.042654,0.042125,0.04306,0.042364,0.042296,0.042568,0.042096,0.042482,0.042937,0.043544,0.042878,0.042889,0.043541,0.042627,0.042207,0.042514,0.042561,0.042769,0.041899,0.042386,0.04307,0.042978,0.042788,0.042821,0.042437,0.042442,0.042025,0.042798,0.042027,0.041724,0.041961,0.0416,0.042406,0.043497,0.042472,0.042933,0.042499,0.042867,0.0425,0.041985,0.041944,0.042698,0.04236,0.042279,0.042194,0.042202,0.042411,0.042599,0.04221,0.041859,0.042454,0.042999,0.042369,0.043044,0.04274,0.04246,0.042357,0.042451,0.042501,0.042671,0.042856,0.042458,0.042132,0.042541,0.042345,0.042509,0.0427,0.043361,0.042225,0.042788,0.042082,0.042921,0.042176,0.042432,0.042705,0.042461,0.04304,0.042406,0.042615,0.042577,0.042731,0.042964,0.042238,0.042091,0.042484,0.043076,0.042708,0.042885,0.042118,0.042678,0.042394,0.043024,0.043134,0.042201,0.042564,0.042727,0.042204,0.042795,0.042082,0.042585,0.042697,0.042685,0.043214,0.042203,0.043028,0.042085,0.042312,0.042087,0.04291,0.042363,0.043026,0.042685,0.042515,0.042348,0.042861,0.042629,0.042213,0.042481,0.042915,0.04252,0.042675,0.042567,0.042944,0.042804,0.042869,0.04286,0.04262,0.043276,0.042458,0.042466,0.042341,0.043034,0.04302,0.042624,0.042644,0.042549,0.042364,0.042661,0.042762,0.042472,0.042556,0.042702,0.042814,0.042881,0.042993,0.042231,0.042487,0.042681,0.042862,0.043071,0.042425,0.041874,0.04255,0.042479,0.042749,0.042072,0.041459,0.043189,0.042747,0.042718,0.042021,0.043007,0.04281,0.042294,0.041937,0.042173,0.042321,0.04212,0.042659,0.042171,0.042525,0.042297,0.042448,0.04215,0.043012,0.042647,0.042424,0.042819,0.041722,0.042076,0.041937,0.042843,0.042179,0.042352,0.042511,0.042966,0.042148,0.042523,0.041979,0.042573,0.042821,0.042439,0.042231,0.042486,0.042729  
0.11825,0.11726,0.11699,0.11718,0.11884,0.11766,0.11842,0.11746,0.11752,0.11671,0.11757,0.11812,0.11721,0.11749,0.11697,0.11766,0.11751,0.11896,0.11796,0.11708,0.24234,0.20732,0.22243,0.22648,0.11749,0.11857,0.11785,0.11735,0.11825,0.11753,0.11716,0.11622,0.11724,0.11757,0.11773,0.11738,0.11691,0.11705,0.11669,0.37181,0.26458,0.22316,0.2578,0.2296,0.24498,0.24125,0.11737,0.11674,0.1173,0.11732,0.1168,0.11712,0.11874,0.1173,0.11717,0.11637,0.11717,0.11807,0.11861,0.11748,0.11648,0.35288,0.37494,0.23043,0.27255,0.24154,0.24835,0.26808,0.27661,0.23079,0.25732,0.11779,0.11734,0.11776,0.11777,0.11796,0.11727,0.11674,0.11743,0.1

1755,0.11824,0.11702,0.11812,0.11871,0.11765,0.11783,0.35736,0.36335,0.35696,0.24753,0.22721,0.25003,0.26873,0.21343,0.24164,0.23514,0.25585,0.23713,0.11703,0.11797,0.11707,0.1176,0.1179,0.11724,0.11891,0.11744,0.118,0.1171,0.11717,0.11842,0.11729,0.11768,0.11804,0.11743,0.3647,0.36712,0.37694,0.37166,0.23854,0.24306,0.24516,0.23416,0.2641,0.2378,0.23382,0.24495,0.26158,0.2487,0.11751,0.11807,0.1175,0.11705,0.11721,0.11651,0.11784,0.11725,0.11781,0.11712,0.11822,0.11789,0.1179,0.11741,0.11756,0.11784,0.34892,0.36648,0.36475,0.37649,0.36819,0.37561,0.24301,0.23144,0.23026,0.24076,0.23495,0.24624,0.23652,0.24394,0.24335,0.25853,0.11719,0.11784,0.11816,0.11832,0.11765,0.11774,0.11808,0.11748,0.11808,0.11735,0.1173,0.11732,0.11882,0.11708,0.11674,0.11879,0.11681,0.35599,0.37277,0.35841,0.37181,0.36935,0.36853,0.2326,0.24809,0.24071,0.23995,0.22607,0.23725,0.22739,0.18301,0.22967,0.25515,0.23827,0.11677,0.117,0.1183,0.11639,0.11686,0.11594,0.11705,0.11667,0.1177,0.11747,0.11813,0.11705,0.11719,0.079806,0.066731,0.087053,0.11739,0.36047,0.37846,0.3641,0.36369,0.37364,0.36628,0.34865,0.24382,0.24696,0.2371,0.22619,0.2411,0.2436,0.21808,0.24463,0.2508,0.25675,0.25002,0.11737,0.11763,0.11713,0.11735,0.11756,0.11768,0.11868,0.11766,0.11747,0.11787,0.11672,0.078326,0.073847,0.085463,0.062668,0.075024,0.080604,0.11719,0.374,0.36388,0.36683,0.36664,0.36122,0.3659,0.37228,0.24705,0.24921,0.24475,0.2418,0.21343,0.23046,0.22657,0.23456,0.26209,0.28474,0.22862,0.11776,0.11728,0.11787,0.11671,0.1181,0.11871,0.11707,0.11794,0.11685,0.071811,0.080347,0.078443,0.073686,0.088511,0.074918,0.079181,0.079459,0.090238,0.11782,0.3663,0.35994,0.35814,0.36457,0.37361,0.37737,0.36765,0.28419,0.23748,0.23379,0.23936,0.24195,0.25797,0.24521,0.24625,0.24303,0.22974,0.23539,0.24036,0.1175,0.1187,0.11814,0.11808,0.11753,0.11799,0.085577,0.07746,0.077843,0.081704,0.079518,0.076052,0.081854,0.083406,0.081454,0.079823,0.078764,0.079504,0.35883,0.36064,0.35947,0.3699,0.35038,0.36532,0.36908,0.20905,0.21146,0.20793,0.24824,0.23588,0.24113,0.23454,0.23747,0.23893,0.23142,0.23468,0.26713,0.11741,0.117,0.11676,0.085399,0.080893,0.082929,0.078768,0.070547,0.08916,0.07503,0.073562,0.080292,0.076985,0.080504,0.079638,0.081138,0.073414,0.082556,0.36963,0.35692,0.37131,0.3587,0.3727,0.37151,0.37435,0.3656,0.3634,0.24728,0.22738,0.23879,0.23681,0.21664,0.24299,0.25332,0.28218,0.24231,0.22927,0.22129,0.083923,0.069019,0.075952,0.082059,0.07832,0.077858,0.077204,0.0796,0.076482,0.078753,0.07577,0.079127,0.080588,0.079824,0.079579,0.080737,0.076293,0.074308,0.36751,0.37135,0.37188,0.37198,0.36345,0.37943,0.37034,0.36951,0.3627,0.23669,0.23829,0.17295,0.16605,0.18728,0.17568,0.1784,0.17214,0.17299,0.18055,0.17119,0.079526,0.0784,0.081451,0.079952,0.081769,0.074789,0.079153,0.069353,0.083004,0.075102,0.085572,0.080211,0.07973,0.07739,0.079422,0.084538,0.082368,0.077861,0.36119,0.35657,0.35824,0.36683,0.36041,0.3637,0.36461,0.36829,0.36137,0.20884,0.18545,0.17582,0.17015,0.18458,0.17636,0.16758,0.18847,0.17848,0.17623,0.1792,0.085194,0.069348,0.079533,0.071941,0.083141,0.080122,0.08004,0.069296,0.078846,0.079509,0.094047,0.077694,0.079586,0.076795,0.087906,0.08492,0.079721,0.078197,0.36606,0.36479,0.36433,0.37377,0.36906,0.37096,0.36431,0.17539,0.18776,0.20299,0.17927,0.17835,0.19953,0.14981,0.17546,0.17896,0.17999,0.16842,0.1822,0.15768,0.079404,0.07897,0.077839,0.07884,0.076396,0.073512,0.08595,0.082617,0.077847,0.078658,0.076784,0.079703,0.078366,0.079338,0.083389,0.07904,0.070205,0.077314,0.35945,0.35946,0.36401,0.36454,0.36167,0.36577,0.20474,0.21147,0.19507,0.20915,0.20295,0.1696,0.17069,0.18213,0.17011,0.17091,0.18418,0.

18741,0.15886,0.18655,0.089566,0.078098,0.079939,0.086903,0.072232,0.0  
8442,0.079829,0.079181,0.076711,0.078286,0.079893,0.079366,0.086289,0.  
078267,0.075514,0.08542,0.086335,0.079718,0.36794,0.3678,0.36313,0.370  
57,0.36789,0.24562,0.20652,0.15457,0.19672,0.22169,0.21344,0.18127,0.1  
426,0.18092,0.18004,0.17657,0.17761,0.17293,0.17543,0.19362,0.078003,0  
.079462,0.08004,0.085647,0.076942,0.079537,0.079633,0.07317,0.087458,0  
.080108,0.084722,0.073583,0.075982,0.090448,0.076143,0.075144,0.079024  
,0.073572,0.36696,0.36449,0.36647,0.16479,0.21041,0.19909,0.17217,0.20  
451,0.20645,0.19285,0.20752,0.16017,0.16789,0.18228,0.17919,0.17285,0.  
15293,0.17876,0.15868,0.18461,0.071664,0.072883,0.080815,0.086067,0.07  
9909,0.080088,0.082583,0.079303,0.072102,0.080948,0.076425,0.081043,0.  
087157,0.079306,0.08105,0.080436,0.07981,0.079106,0.36989,0.18765,0.20  
244,0.20634,0.2019,0.24865,0.16462,0.2078,0.19732,0.23683,0.16991,0.13  
953,0.18354,0.16276,0.18751,0.17003,0.18469,0.14469,0.17603,0.078848,0  
.079499,0.073999,0.078592,0.079812,0.075973,0.074837,0.085888,0.087886  
,0.073124,0.080346,0.079982,0.075177,0.081472,0.072931,0.08379,0.09178  
8,0.041747,0.20364,0.2053,0.20729,0.20273,0.20732,0.21077,0.19516,0.23  
914,0.17211,0.23199,0.18928,0.18151,0.18031,0.17583,0.15279,0.17223,0.  
18492,0.17438,0.14256,0.079411,0.076991,0.082453,0.078201,0.087075,0.0  
77951,0.078862,0.079985,0.081117,0.079375,0.078949,0.071747,0.067813,0  
.079323,0.079291,0.074346,0.074478,0.041772,0.24343,0.21005,0.20558,0.  
21979,0.21194,0.20683,0.19277,0.21019,0.19715,0.20172,0.17845,0.19347,  
0.19371,0.17492,0.18946,0.17449,0.14904,0.18426,0.074419,0.075897,0.07  
4563,0.075044,0.079461,0.0794,0.083364,0.079611,0.082464,0.075928,0.10  
447,0.074427,0.083549,0.083862,0.080265,0.069927,0.079327,0.078912,0.0  
42124,0.24095,0.197,0.17205,0.23939,0.19081,0.2081,0.19374,0.19187,0.2  
1265,0.21743,0.17849,0.18028,0.18079,0.17895,0.17992,0.19161,0.18901,0  
.17646,0.073388,0.077465,0.086348,0.079704,0.063254,0.082539,0.07992,0  
.086741,0.075584,0.087544,0.084055,0.087941,0.081948,0.076314,0.07962,  
0.074779,0.07352,0.041474,0.042094,0.041238,0.18606,0.19266,0.19587,0.  
21032,0.22828,0.19761,0.20387,0.21749,0.20968,0.16665,0.19021,0.17769,  
0.20497,0.18656,0.16305,0.079987,0.079212,0.079699,0.073954,0.080527,0  
.084322,0.070948,0.079554,0.091868,0.079541,0.078499,0.079956,0.079938  
,0.078793,0.094511,0.086816,0.077292,0.078293,0.041449,0.041528,0.0418  
47,0.041464,0.16642,0.16094,0.24491,0.22173,0.22164,0.2028,0.20659,0.1  
1356,0.20346,0.20101,0.14137,0.17541,0.079762,0.07908,0.074809,0.07554  
8,0.075652,0.078526,0.079522,0.08126,0.07682,0.073313,0.079128,0.08377  
1,0.073003,0.079027,0.080026,0.079869,0.082833,0.075347,0.086223,0.079  
943,0.041383,0.041721,0.041698,0.041777,0.041639,0.041651,0.24102,0.20  
783,0.20533,0.21489,0.21736,0.25654,0.20379,0.19855,0.079946,0.086615,  
0.071905,0.085825,0.072783,0.079989,0.080398,0.076194,0.082711,0.07892  
2,0.08111,0.082038,0.077964,0.079372,0.079958,0.079615,0.075514,0.0805  
62,0.077522,0.0938,0.074172,0.079348,0.079658,0.041882,0.042075,0.0417  
14,0.041463,0.041457,0.041549,0.20987,0.19663,0.19594,0.22241,0.20622,  
0.041076,0.040973,0.074559,0.076626,0.076835,0.079132,0.077403,0.08021  
7,0.079788,0.078813,0.077992,0.081735,0.080922,0.079451,0.076552,0.071  
531,0.084193,0.084897,0.088274,0.080547,0.083593,0.079045,0.080181,0.0  
41175,0.040899,0.041598,0.042406,0.042044,0.041695,0.041832,0.042109,0  
.041374,0.041602,0.21904,0.21556,0.041205,0.04212,0.041869,0.041818,0.  
078418,0.079506,0.07581,0.083103,0.075186,0.086799,0.080038,0.075692,0  
.078621,0.079988,0.080242,0.086508,0.083096,0.079403,0.075758,0.075427  
,0.079573,0.082229,0.078291,0.041948,0.041532,0.041945,0.041912,0.0417

23,0.041948,0.04194,0.042025,0.041395,0.041483,0.042042,0.041933,0.040785,0.04165,0.04151,0.041696,0.041776,0.079136,0.07635,0.079235,0.07936,0.077023,0.079262,0.081048,0.078791,0.079444,0.088023,0.074882,0.083927,0.080343,0.083582,0.083716,0.079365,0.041493,0.042315,0.041491,0.042064,0.041385,0.041473,0.041941,0.041723,0.041135,0.041348,0.04217,0.041706,0.041325,0.04128,0.041228,0.041329,0.041404,0.041156,0.041604,0.084642,0.079171,0.073894,0.074224,0.078613,0.072289,0.081415,0.074089,0.079521,0.071816,0.075093,0.081536,0.078789,0.04201,0.041159,0.041897,0.041166,0.041738,0.041705,0.041163,0.041478,0.040718,0.041678,0.041642,0.040872,0.042209,0.041267,0.041149,0.041465,0.041495,0.041605,0.041706,0.041731,0.041294,0.0765,0.079975,0.076493,0.078523,0.082109,0.079282,0.079616,0.084631,0.083246,0.041359,0.04187,0.041198,0.041609,0.041343,0.042132,0.04157,0.041804,0.041992,0.041439,0.041613,0.041609,0.042422,0.041314,0.041459,0.041356,0.04109,0.041939,0.041551,0.041946,0.042437,0.042172,0.041302,0.040871,0.04144,0.084648,0.078088,0.079114,0.079795,0.04157,0.041392,0.041956,0.041471,0.041234,0.041861,0.04117,0.041566,0.041791,0.042699,0.041924,0.041884,0.042675,0.041719,0.041231,0.041354,0.041313,0.041909,0.041173,0.041405,0.042069,0.041992,0.04189,0.041945,0.041473,0.041271,0.040953,0.041628,0.041138,0.041073,0.041199,0.04064,0.041536,0.042569,0.041678,0.041936,0.041684,0.041961,0.04165,0.041064,0.041217,0.041852,0.041258,0.041331,0.041345,0.041302,0.041666,0.041759,0.041471,0.041043,0.0417,0.042045,0.041235,0.041827,0.041706,0.041565,0.041162,0.04158,0.041553,0.042086,0.041672,0.04142,0.041246,0.041583,0.041489,0.041771,0.041919,0.042491,0.041309,0.041734,0.041189,0.041924,0.041275,0.041619,0.041882,0.04167,0.04185,0.041539,0.041747,0.041629,0.041736,0.042115,0.041425,0.040811,0.04088,0.042548,0.041878,0.041967,0.041257,0.041593,0.041322,0.041997,0.042205,0.041345,0.041225,0.041411,0.041502,0.041689,0.041511,0.041611,0.041833,0.041629,0.042362,0.041201,0.04231,0.041205,0.041389,0.041137,0.042242,0.041424,0.042331,0.04177,0.041761,0.041388,0.041967,0.041969,0.041344,0.041555,0.041931,0.041645,0.041639,0.041354,0.04187,0.041924,0.042039,0.04195,0.041702,0.042039,0.041574,0.041436,0.041696,0.0418,0.042094,0.041717,0.041898,0.041663,0.041388,0.041757,0.041606,0.04184,0.041642,0.041384,0.042225,0.042019,0.042314,0.041472,0.041678,0.041674,0.042149,0.041631,0.041728,0.041088,0.041907,0.041397,0.042147,0.041382,0.040546,0.041947,0.041744,0.041731,0.041246,0.042223,0.041882,0.041275,0.041066,0.04139,0.041313,0.041245,0.041758,0.04127,0.041817,0.041163,0.041708,0.041314,0.041964,0.041625,0.041485,0.04185,0.041321,0.041365,0.041194,0.041457,0.04153,0.041498,0.041285,0.042084,0.041349,0.041727,0.040788,0.041509,0.042392,0.041346,0.041192,0.041352,0.041645  
0.11417,0.11314,0.11273,0.11345,0.11475,0.11395,0.11377,0.11341,0.11313,0.11254,0.11299,0.11329,0.11315,0.11369,0.11258,0.11327,0.11357,0.11456,0.11362,0.11302,0.23833,0.2029,0.21868,0.22444,0.11335,0.11427,0.11352,0.11297,0.11406,0.1136,0.113,0.11224,0.113,0.11345,0.11339,0.11293,0.11284,0.11249,0.11213,0.37423,0.26068,0.21696,0.25477,0.22432,0.24158,0.23813,0.11331,0.11197,0.11275,0.11352,0.11238,0.11279,0.11457,0.11328,0.11274,0.11198,0.1129,0.11384,0.1142,0.11304,0.1128,0.35246,0.37138,0.22823,0.27138,0.23706,0.24471,0.26313,0.27316,0.22679,0.25378,0.11328,0.11334,0.11338,0.11357,0.11361,0.11275,0.11275,0.11345,0.11319,0.11373,0.11269,0.114,0.11427,0.11375,0.11378,0.35841,0.364,0.35571,0.24469,0.22274,0.24872,0.26479,0.21053,0.23925,0.23104,0.25306,0.23341,0.11311,0.11337,0.11308,0.1133,0.11382,0.11253,0.11405,0.11296,0.1135

9,0.1129,0.11289,0.1137,0.11308,0.11357,0.11401,0.11311,0.36339,0.3625  
2,0.36917,0.36678,0.23469,0.23897,0.24254,0.23066,0.25851,0.23787,0.23  
117,0.24002,0.25756,0.24598,0.11329,0.1135,0.11318,0.11318,0.11291,0.1  
1228,0.1133,0.11268,0.11372,0.11243,0.11383,0.11359,0.1141,0.1133,0.11  
357,0.11317,0.34919,0.36099,0.36019,0.36762,0.36523,0.37101,0.23928,0.  
227,0.22566,0.23835,0.23289,0.2419,0.23276,0.24152,0.24009,0.25385,0.1  
1298,0.11363,0.11408,0.11405,0.11379,0.11368,0.1141,0.11316,0.11365,0.  
1133,0.11334,0.11305,0.1149,0.11276,0.11257,0.11434,0.11264,0.3541,0.3  
6456,0.35456,0.3723,0.36268,0.36389,0.22894,0.24416,0.238,0.23784,0.22  
16,0.23281,0.22292,0.17959,0.22449,0.252,0.23676,0.11208,0.1131,0.1142  
2,0.11236,0.11306,0.11169,0.11293,0.11289,0.11379,0.11296,0.11392,0.11  
234,0.1125,0.077518,0.064952,0.08476,0.11281,0.35772,0.37473,0.3616,0.  
35916,0.37084,0.3627,0.34599,0.24133,0.24156,0.23616,0.22252,0.2371,0.  
24038,0.2172,0.24257,0.24485,0.25287,0.24331,0.11305,0.1132,0.11322,0.  
11318,0.11314,0.11329,0.11404,0.11349,0.11292,0.11389,0.11251,0.076091  
,0.07157,0.082598,0.060878,0.072684,0.078095,0.11303,0.36591,0.35829,0  
.36126,0.36502,0.35859,0.36069,0.36957,0.24279,0.24232,0.24087,0.23908  
,0.20962,0.2267,0.22113,0.22841,0.25907,0.2833,0.22384,0.1136,0.11299,  
0.11368,0.11264,0.11363,0.11465,0.11303,0.1135,0.11309,0.069851,0.0780  
74,0.076116,0.071596,0.085909,0.072918,0.076686,0.077104,0.087234,0.11  
369,0.36446,0.36043,0.35587,0.36688,0.36841,0.37753,0.36271,0.27806,0.  
23424,0.23226,0.2359,0.23899,0.25219,0.23962,0.24351,0.24015,0.22466,0  
.23258,0.23744,0.11312,0.11411,0.11435,0.11383,0.11337,0.11369,0.08267  
6,0.075151,0.075449,0.079376,0.077403,0.074035,0.079443,0.080954,0.079  
008,0.077223,0.076129,0.077281,0.35622,0.35696,0.35394,0.36862,0.34657  
,0.36371,0.3675,0.20549,0.2079,0.20286,0.24746,0.23177,0.23691,0.23068  
,0.23192,0.23313,0.22924,0.23012,0.26292,0.11285,0.1133,0.11283,0.0824  
36,0.078752,0.080197,0.076234,0.068528,0.086367,0.07295,0.07118,0.0777  
31,0.074728,0.077945,0.076894,0.078502,0.070967,0.079811,0.3644,0.3529  
6,0.36862,0.35644,0.36894,0.36781,0.3725,0.36302,0.35523,0.24182,0.224  
36,0.23385,0.23165,0.21411,0.23779,0.25183,0.27787,0.23685,0.22638,0.2  
1673,0.081353,0.067359,0.073732,0.079433,0.075545,0.075465,0.074904,0.  
077148,0.074167,0.076682,0.073716,0.076604,0.077934,0.077505,0.07723,0  
.078215,0.073848,0.072031,0.36794,0.36491,0.36479,0.3677,0.35915,0.377  
83,0.36257,0.36141,0.35625,0.23224,0.23374,0.17185,0.163,0.18521,0.173  
05,0.17635,0.16873,0.17073,0.17901,0.16931,0.077351,0.076079,0.079089,  
0.077682,0.079545,0.072828,0.076619,0.067519,0.080536,0.072743,0.08273  
6,0.077811,0.077249,0.074851,0.076873,0.082072,0.079991,0.075475,0.358  
79,0.35788,0.35572,0.36215,0.35907,0.36406,0.35362,0.36808,0.35972,0.2  
0637,0.18168,0.17298,0.16619,0.18111,0.17411,0.16301,0.18624,0.17571,0  
.17446,0.17772,0.082505,0.067164,0.077241,0.069928,0.080497,0.078082,0  
.07744,0.067515,0.076229,0.07711,0.091381,0.075463,0.076841,0.074893,0  
.085292,0.082112,0.077407,0.075558,0.36683,0.35991,0.36379,0.37,0.3691  
,0.36702,0.36218,0.17535,0.18406,0.20109,0.17743,0.17459,0.1962,0.1480  
7,0.17345,0.17802,0.17639,0.16725,0.17852,0.15564,0.077011,0.076504,0.  
074887,0.076707,0.074287,0.071544,0.083724,0.079651,0.075883,0.076126,  
0.074724,0.077581,0.076253,0.077342,0.081068,0.07665,0.068119,0.074891  
,0.35687,0.35819,0.35949,0.36345,0.35995,0.3618,0.20188,0.20904,0.1931  
7,0.20541,0.20078,0.16748,0.16668,0.18031,0.16803,0.16721,0.17849,0.18  
581,0.1561,0.1846,0.086849,0.075957,0.077492,0.084273,0.070032,0.08146  
2,0.077544,0.076498,0.073998,0.075825,0.077345,0.07697,0.084017,0.0760  
03,0.073313,0.082505,0.083501,0.077342,0.36279,0.36467,0.36404,0.36872

,0.36614,0.2449,0.2022,0.15186,0.19716,0.22139,0.21251,0.18026,0.13992  
,0.17699,0.17767,0.17377,0.17431,0.16923,0.1729,0.1911,0.075481,0.0767  
42,0.077264,0.082745,0.074863,0.077013,0.077178,0.070709,0.084939,0.07  
7671,0.08188,0.071368,0.07388,0.087899,0.073888,0.072503,0.076789,0.07  
1268,0.36483,0.35901,0.36475,0.1633,0.20795,0.19744,0.17095,0.20316,0.  
20308,0.19069,0.20439,0.15837,0.16531,0.17961,0.17688,0.17061,0.14994,  
0.17696,0.15494,0.18163,0.069605,0.070849,0.078357,0.083318,0.077733,0  
.077577,0.07965,0.076791,0.06998,0.078554,0.073835,0.078301,0.084588,0  
.076508,0.078581,0.07796,0.077113,0.076529,0.36718,0.18637,0.19881,0.2  
0525,0.19933,0.24618,0.16272,0.20311,0.19629,0.23597,0.16756,0.13703,0  
.18087,0.15957,0.18669,0.16777,0.18211,0.14226,0.17284,0.076477,0.0769  
44,0.071505,0.076183,0.077377,0.073477,0.072712,0.082955,0.084897,0.07  
1239,0.078095,0.077489,0.07313,0.078844,0.070564,0.081242,0.088722,0.0  
41098,0.2026,0.20315,0.20489,0.20145,0.2042,0.20906,0.19465,0.23493,0.  
16794,0.23001,0.18905,0.18029,0.17804,0.17263,0.15067,0.17084,0.1811,0  
.17285,0.13946,0.076673,0.074688,0.079988,0.075821,0.084521,0.075597,0  
.076501,0.077659,0.078665,0.077317,0.076835,0.069413,0.065554,0.07651,  
0.077431,0.072515,0.072511,0.040897,0.2403,0.2088,0.20435,0.21908,0.20  
969,0.20549,0.19049,0.20793,0.19556,0.19935,0.17508,0.19019,0.19322,0.  
17233,0.18418,0.17348,0.14585,0.18164,0.072547,0.073357,0.072165,0.072  
705,0.077198,0.077085,0.081104,0.076859,0.079921,0.073676,0.10062,0.07  
245,0.081054,0.080977,0.077884,0.067759,0.076975,0.076463,0.04144,0.24  
011,0.19731,0.17018,0.23718,0.18793,0.20693,0.19252,0.18827,0.20975,0.  
21437,0.17586,0.17797,0.17905,0.17614,0.17628,0.1876,0.18735,0.17319,0  
.071227,0.074934,0.083647,0.077319,0.06155,0.079763,0.077191,0.083832,  
0.073383,0.084813,0.081376,0.085121,0.079886,0.074083,0.077376,0.07249  
7,0.070814,0.040739,0.041202,0.040825,0.18321,0.18842,0.19418,0.20709,  
0.22782,0.19428,0.20002,0.21425,0.20762,0.16431,0.18583,0.17574,0.2016  
6,0.18306,0.16044,0.077524,0.076916,0.077249,0.071995,0.077955,0.08125  
6,0.068755,0.076926,0.088702,0.077079,0.07606,0.077435,0.077533,0.0760  
55,0.091538,0.084147,0.074967,0.076185,0.04099,0.040947,0.041252,0.040  
893,0.16547,0.16006,0.23959,0.21683,0.21817,0.20184,0.20411,0.11291,0.  
20103,0.19866,0.14007,0.17227,0.077087,0.076752,0.072648,0.073492,0.07  
329,0.076125,0.077311,0.078742,0.074335,0.071137,0.0767,0.081013,0.070  
871,0.076745,0.077795,0.077495,0.080419,0.073249,0.083442,0.077259,0.0  
40545,0.040967,0.040806,0.041223,0.040957,0.040838,0.23779,0.20843,0.2  
0295,0.21197,0.21531,0.25376,0.19906,0.19795,0.077586,0.083855,0.06956  
9,0.083039,0.070611,0.07726,0.078012,0.073947,0.079992,0.07688,0.07845  
5,0.07938,0.075653,0.076744,0.077094,0.077393,0.073451,0.078137,0.0754  
77,0.090638,0.071922,0.076979,0.077232,0.041454,0.041526,0.041031,0.04  
0798,0.041053,0.040842,0.20816,0.19491,0.19259,0.21934,0.20299,0.04056  
,0.040316,0.072545,0.074438,0.074555,0.076705,0.074721,0.077631,0.0774  
1,0.076508,0.075787,0.07924,0.078603,0.077219,0.074071,0.069113,0.0815  
16,0.08239,0.085333,0.077785,0.080651,0.076303,0.0779,0.04061,0.04013,  
0.0409,0.041566,0.041336,0.041056,0.040964,0.041301,0.040879,0.04115,0  
.21641,0.21436,0.040576,0.041267,0.041147,0.041048,0.075638,0.077219,0  
.073528,0.08044,0.072445,0.084142,0.077766,0.073291,0.076446,0.077638,  
0.077921,0.084001,0.080629,0.076914,0.073444,0.073265,0.077494,0.07994  
1,0.076131,0.041099,0.040799,0.041073,0.041257,0.041186,0.041189,0.041  
077,0.04101,0.040865,0.040998,0.041678,0.041602,0.040176,0.040936,0.04  
0783,0.040747,0.041135,0.076771,0.074004,0.076764,0.076827,0.07455,0.0  
77217,0.07837,0.07659,0.076973,0.085123,0.072628,0.081253,0.077705,0.0



80895,0.080832,0.076818,0.040617,0.041821,0.040787,0.041348,0.040609,0.040762,0.041104,0.040882,0.040501,0.040897,0.041525,0.04078,0.040615,0.04044,0.040851,0.040633,0.040735,0.040563,0.041155,0.082102,0.076929,0.071657,0.072246,0.076237,0.070059,0.078584,0.072031,0.076935,0.069795,0.0728,0.079276,0.076523,0.041331,0.040519,0.040969,0.040716,0.041364,0.040837,0.04034,0.040753,0.039891,0.041146,0.040924,0.04048,0.041774,0.040571,0.04061,0.040649,0.040926,0.040941,0.041189,0.040785,0.040838,0.074051,0.077686,0.074254,0.076323,0.079577,0.077216,0.077445,0.08174,0.080645,0.041042,0.041409,0.040474,0.041168,0.040855,0.041588,0.041033,0.041342,0.04149,0.040668,0.040586,0.040979,0.041522,0.040817,0.041005,0.040821,0.040443,0.04115,0.040891,0.041196,0.041564,0.041556,0.040636,0.040316,0.040492,0.081828,0.076017,0.076772,0.077546,0.040893,0.041041,0.041359,0.041049,0.040375,0.041388,0.041162,0.040659,0.041304,0.042004,0.041132,0.041425,0.042024,0.04096,0.040431,0.040677,0.040713,0.041333,0.040817,0.040721,0.041066,0.041171,0.041261,0.041539,0.040783,0.040423,0.040497,0.040988,0.040652,0.040475,0.040507,0.040337,0.040891,0.041913,0.041201,0.041424,0.040912,0.041339,0.041326,0.040134,0.04072,0.040911,0.040579,0.04078,0.04069,0.040506,0.041344,0.040955,0.041375,0.040598,0.041031,0.041583,0.040657,0.041415,0.041243,0.040961,0.040644,0.040944,0.040786,0.041406,0.041303,0.040758,0.040554,0.041094,0.040461,0.041106,0.041451,0.041664,0.040879,0.04087,0.040669,0.041271,0.040515,0.040983,0.041274,0.041099,0.040808,0.040798,0.041132,0.041169,0.040768,0.04163,0.040787,0.04053,0.040561,0.041563,0.040978,0.041515,0.040634,0.041025,0.04086,0.041412,0.041376,0.041042,0.040665,0.040734,0.040732,0.040903,0.040975,0.040656,0.040948,0.041118,0.041629,0.04054,0.041628,0.040619,0.040722,0.040653,0.041592,0.041019,0.041635,0.0409,0.041193,0.040505,0.04132,0.041442,0.041005,0.040669,0.041296,0.041137,0.041002,0.040522,0.040963,0.041181,0.041599,0.041309,0.040715,0.04083,0.040983,0.040556,0.041161,0.040957,0.041263,0.040944,0.041332,0.04065,0.040888,0.041009,0.040774,0.04106,0.041164,0.040644,0.041556,0.041132,0.041792,0.040924,0.040721,0.041163,0.041311,0.04069,0.041223,0.040305,0.041424,0.040734,0.041243,0.0409,0.040032,0.04133,0.040998,0.041104,0.040727,0.041727,0.040938,0.0407,0.040577,0.040748,0.040314,0.040821,0.04138,0.040639,0.041264,0.040611,0.040696,0.040846,0.041382,0.040933,0.040916,0.041055,0.040745,0.040831,0.040398,0.040756,0.040767,0.040883,0.040956,0.041347,0.040552,0.040985,0.039915,0.0408,0.041574,0.040847,0.040619,0.040711,0.040986  
0.11001,0.10951,0.10936,0.11029,0.11154,0.11038,0.11043,0.11022,0.11001,0.10923,0.1097,0.10984,0.10982,0.10992,0.10948,0.10958,0.11017,0.1117,0.11037,0.10959,0.23529,0.19919,0.21669,0.22175,0.10975,0.11083,0.111,0.10898,0.11065,0.10998,0.1094,0.1088,0.10971,0.10979,0.11016,0.10956,0.10971,0.109,0.10855,0.37156,0.25513,0.215,0.25284,0.22351,0.24122,0.23549,0.10963,0.10856,0.10974,0.11044,0.10892,0.10901,0.11101,0.10973,0.1089,0.10896,0.10939,0.11065,0.11025,0.10972,0.10961,0.34926,0.36731,0.22492,0.26702,0.23266,0.24057,0.26008,0.26915,0.22385,0.25094,0.11018,0.1099,0.11012,0.11018,0.11054,0.10922,0.10945,0.10959,0.11024,0.11045,0.10938,0.11053,0.11045,0.11,0.11044,0.35459,0.36645,0.35434,0.24153,0.22,0.2416,0.26071,0.20642,0.23428,0.22744,0.25008,0.23281,0.10924,0.10967,0.10969,0.10969,0.11001,0.10922,0.11032,0.10885,0.10984,0.10996,0.10907,0.1104,0.10938,0.10975,0.11026,0.10954,0.3622,0.36346,0.36404,0.3594,0.23542,0.23521,0.23921,0.22644,0.25375,0.23452,0.22991,0.23692,0.25448,0.24241,0.10959,0.11001,0.10958,0.1096,0.10933,0.10918,0

.10991,0.10882,0.11006,0.10886,0.1111,0.11012,0.11069,0.10962,0.11029,  
0.10997,0.34828,0.35917,0.36217,0.36246,0.36534,0.3706,0.23745,0.22388  
,0.22365,0.23492,0.23047,0.24011,0.22888,0.23895,0.23767,0.25227,0.109  
21,0.11025,0.11009,0.11077,0.10994,0.11031,0.11039,0.10933,0.11016,0.1  
0978,0.10923,0.10954,0.11149,0.10974,0.10887,0.11063,0.10942,0.35358,0  
.35914,0.35004,0.37123,0.36212,0.36729,0.22669,0.2425,0.23314,0.23467,  
0.21844,0.23013,0.22085,0.17699,0.22012,0.24879,0.23489,0.10863,0.1099  
1,0.11074,0.10887,0.1096,0.10803,0.10947,0.10976,0.1103,0.10943,0.1103  
,0.10901,0.1093,0.075221,0.063188,0.082129,0.1092,0.35333,0.36881,0.35  
626,0.36085,0.36556,0.35845,0.33978,0.23629,0.23762,0.23238,0.22164,0.  
23518,0.23753,0.21501,0.24032,0.24271,0.24661,0.23783,0.10923,0.10939,  
0.10911,0.10967,0.11001,0.10961,0.11093,0.11026,0.10952,0.10997,0.1095  
7,0.074061,0.069836,0.080179,0.059482,0.070819,0.076311,0.10966,0.3619  
7,0.35729,0.35495,0.36332,0.35967,0.35943,0.36384,0.24081,0.24023,0.23  
734,0.23626,0.20672,0.22426,0.21876,0.22466,0.25427,0.27944,0.22079,0.  
11014,0.10968,0.10996,0.10928,0.11061,0.1109,0.10912,0.1106,0.10979,0.  
0682,0.076345,0.074282,0.069809,0.083803,0.070979,0.074415,0.075052,0.  
085157,0.11036,0.36142,0.35994,0.34778,0.36441,0.36574,0.37382,0.35543  
,0.27701,0.23066,0.22874,0.23282,0.23649,0.24901,0.23834,0.2402,0.2373  
6,0.22034,0.23089,0.23451,0.10934,0.11082,0.11062,0.11048,0.1101,0.110  
36,0.080369,0.072956,0.073533,0.077395,0.075132,0.071861,0.07715,0.078  
731,0.076875,0.075362,0.074139,0.07546,0.35346,0.35534,0.3539,0.36043,  
0.34406,0.3616,0.36153,0.20091,0.20382,0.2013,0.243,0.22863,0.23275,0.  
22771,0.22834,0.22911,0.22782,0.22699,0.2603,0.10952,0.11004,0.10999,0  
.080125,0.076507,0.077907,0.074161,0.066995,0.083943,0.071053,0.069543  
,0.075802,0.072892,0.076005,0.074991,0.076383,0.06906,0.077936,0.35968  
,0.35314,0.36525,0.3564,0.36676,0.364,0.36943,0.35413,0.35268,0.23502,  
0.22293,0.23107,0.22862,0.21069,0.23309,0.2492,0.27659,0.23287,0.22328  
,0.21247,0.079157,0.065552,0.071796,0.077233,0.073536,0.073382,0.07287  
5,0.074889,0.071957,0.074919,0.072362,0.07478,0.076113,0.075403,0.0755  
67,0.075951,0.071786,0.070281,0.36473,0.36217,0.35928,0.36391,0.35159,  
0.37345,0.36037,0.3554,0.35291,0.23026,0.23358,0.16997,0.16077,0.1834,  
0.16985,0.17508,0.16583,0.16851,0.17768,0.16708,0.075355,0.074029,0.07  
6961,0.075868,0.077248,0.071,0.074889,0.065639,0.078723,0.070918,0.080  
606,0.075856,0.07532,0.07289,0.07495,0.079923,0.07776,0.073533,0.35588  
,0.35745,0.3554,0.3579,0.35349,0.3641,0.35391,0.36375,0.35823,0.20443,  
0.18005,0.17044,0.16405,0.17943,0.17278,0.16113,0.18234,0.17433,0.1719  
1,0.17555,0.080333,0.065551,0.074851,0.068199,0.07836,0.075884,0.07530  
2,0.065773,0.074266,0.075274,0.089009,0.073611,0.07475,0.07298,0.08306  
2,0.080205,0.075428,0.073631,0.3666,0.35748,0.36479,0.36745,0.35867,0.  
36263,0.36102,0.17379,0.18492,0.20027,0.17615,0.17198,0.19326,0.14635,  
0.16962,0.17489,0.17391,0.16562,0.17844,0.15367,0.074947,0.074533,0.07  
2994,0.074536,0.072306,0.070026,0.081448,0.077393,0.074017,0.074232,0.  
073044,0.075588,0.074018,0.07539,0.078803,0.074735,0.066601,0.072922,0  
.35604,0.35441,0.35933,0.35672,0.36012,0.36077,0.19714,0.20754,0.19111  
,0.20224,0.19971,0.16394,0.16373,0.17754,0.16544,0.16383,0.17573,0.182  
88,0.1548,0.18327,0.084275,0.07396,0.07546,0.081935,0.068149,0.079187,  
0.075919,0.0745,0.072059,0.073943,0.075393,0.075063,0.08182,0.074218,0  
.071208,0.080416,0.080823,0.075366,0.35849,0.365,0.36227,0.36664,0.365  
46,0.24534,0.20138,0.1512,0.19654,0.22096,0.20749,0.17684,0.13727,0.17  
485,0.17472,0.17023,0.17074,0.16768,0.17192,0.18793,0.073542,0.074912,  
0.075326,0.080362,0.073049,0.075104,0.075513,0.069237,0.083092,0.07571

2,0.079368,0.069776,0.072321,0.085437,0.072145,0.070753,0.074987,0.069377,0.36014,0.35439,0.36501,0.16363,0.20654,0.19561,0.1689,0.20328,0.20215,0.19011,0.20245,0.1569,0.16386,0.17823,0.17473,0.16898,0.1478,0.17637,0.15266,0.18041,0.067615,0.068863,0.076268,0.081268,0.075741,0.075635,0.077451,0.074718,0.068421,0.076145,0.07209,0.076142,0.082335,0.074767,0.076578,0.075867,0.075454,0.074753,0.36291,0.1856,0.19994,0.20385,0.19885,0.24579,0.16165,0.20132,0.19406,0.2329,0.16703,0.13474,0.17841,0.15771,0.18274,0.16489,0.17932,0.1395,0.1706,0.07464,0.075174,0.069849,0.074269,0.075295,0.071713,0.07085,0.080613,0.082422,0.069785,0.076167,0.075569,0.070946,0.076824,0.068996,0.079018,0.086344,0.040389,0.20141,0.20097,0.20399,0.20288,0.20073,0.20802,0.19293,0.23498,0.16376,0.229,0.18757,0.17697,0.17487,0.1712,0.14805,0.16816,0.17998,0.17127,0.13692,0.074465,0.072752,0.077858,0.074008,0.082151,0.073698,0.074641,0.075522,0.076897,0.075185,0.074879,0.067873,0.064203,0.074581,0.075264,0.071101,0.070834,0.04062,0.23704,0.20684,0.20233,0.21658,0.20828,0.20641,0.18822,0.2042,0.19338,0.19771,0.17303,0.18747,0.19009,0.16927,0.18408,0.16992,0.14285,0.17962,0.070624,0.071878,0.07055,0.070894,0.074909,0.075216,0.078875,0.075289,0.077787,0.071844,0.09712,0.070061,0.078946,0.078362,0.07604,0.066075,0.07529,0.074608,0.040949,0.23844,0.19506,0.17043,0.23475,0.18718,0.20365,0.19081,0.18759,0.20742,0.21277,0.17388,0.17614,0.17689,0.17318,0.17358,0.18381,0.18545,0.17159,0.069646,0.073035,0.081564,0.07548,0.060217,0.077651,0.07535,0.081541,0.071673,0.082427,0.07898,0.082831,0.07761,0.072094,0.075604,0.070916,0.06935,0.040239,0.040843,0.040294,0.17999,0.18591,0.19301,0.20648,0.22663,0.19231,0.19908,0.21341,0.20365,0.16235,0.18524,0.17326,0.1991,0.18114,0.15883,0.075823,0.074797,0.075254,0.070408,0.076098,0.079087,0.066746,0.074913,0.086703,0.075244,0.074124,0.075563,0.075348,0.073994,0.089391,0.081673,0.073061,0.074155,0.040255,0.040397,0.04081,0.040258,0.16573,0.15903,0.23964,0.21513,0.21597,0.20064,0.2045,0.11141,0.19977,0.19553,0.13817,0.16994,0.075211,0.074611,0.070808,0.072038,0.071368,0.074214,0.075427,0.076618,0.071942,0.069846,0.0747,0.078803,0.069301,0.074767,0.075921,0.075499,0.078363,0.071335,0.080986,0.075577,0.039918,0.040645,0.040268,0.040818,0.040939,0.040364,0.23507,0.20635,0.20323,0.20887,0.21145,0.25086,0.19769,0.19699,0.07573,0.081062,0.067831,0.080849,0.068906,0.07537,0.076004,0.071945,0.077832,0.074938,0.076419,0.077638,0.074145,0.074921,0.075342,0.075613,0.071693,0.076345,0.073496,0.088222,0.070055,0.074649,0.075165,0.040806,0.041075,0.04049,0.040488,0.040629,0.040311,0.20515,0.19505,0.19426,0.21731,0.20218,0.039877,0.040158,0.070379,0.072704,0.072906,0.074682,0.072667,0.075679,0.07549,0.074504,0.073945,0.077572,0.07629,0.075093,0.072069,0.06765,0.079785,0.079779,0.083024,0.075551,0.078592,0.074437,0.075779,0.040122,0.039806,0.040478,0.041056,0.040819,0.040719,0.040449,0.040925,0.040287,0.040532,0.21522,0.21259,0.040344,0.040701,0.040654,0.040768,0.073768,0.074804,0.07168,0.078572,0.070668,0.081867,0.075597,0.071477,0.074489,0.07545,0.07626,0.081822,0.078293,0.074853,0.071441,0.071306,0.075426,0.07788,0.074512,0.040421,0.040506,0.040533,0.040468,0.040391,0.040667,0.040593,0.040562,0.040527,0.040462,0.041156,0.0411,0.039777,0.040347,0.040493,0.040196,0.040746,0.074689,0.072221,0.074931,0.074982,0.072378,0.075391,0.076264,0.074534,0.075186,0.08269,0.070875,0.079008,0.075341,0.078978,0.079001,0.074384,0.03999,0.041317,0.040269,0.04097,0.040323,0.040507,0.040389,0.040574,0.040191,0.040634,0.040975,0.039857,0.040393,0.040016,0.040317,0.039978,0.040048,0.040354,0.040328,0.079789,0.075068,0.

070196,0.070623,0.074192,0.068141,0.076598,0.070269,0.074935,0.068199,  
0.071241,0.077667,0.074874,0.041144,0.040268,0.04025,0.040193,0.04074,  
0.040339,0.039706,0.039951,0.039612,0.040408,0.040368,0.040092,0.04123  
9,0.040212,0.040005,0.039882,0.040302,0.040319,0.041,0.04027,0.040388,  
0.072263,0.075438,0.072517,0.074275,0.07718,0.074875,0.075581,0.079262  
,0.078432,0.040328,0.040656,0.040004,0.040662,0.040271,0.040983,0.0401  
85,0.040956,0.040843,0.040354,0.040118,0.040726,0.0412,0.040155,0.0403  
56,0.040564,0.039944,0.040621,0.040485,0.040663,0.041401,0.041072,0.03  
9891,0.039723,0.040181,0.079225,0.074487,0.074918,0.075172,0.040453,0.  
040681,0.040719,0.040956,0.039804,0.040957,0.040611,0.04059,0.040938,0.  
.041097,0.040534,0.040934,0.041432,0.040401,0.040103,0.039945,0.039959  
,0.040703,0.04031,0.040687,0.040456,0.040631,0.040741,0.040981,0.03989  
3,0.040197,0.039847,0.040562,0.039918,0.039531,0.039855,0.039758,0.040  
298,0.041478,0.040562,0.04081,0.0403,0.040786,0.040993,0.03963,0.04028  
8,0.040547,0.040318,0.040138,0.040065,0.040183,0.041027,0.040505,0.040  
738,0.039964,0.040378,0.040737,0.040075,0.041027,0.040792,0.040157,0.0.  
40142,0.040202,0.040511,0.04097,0.040941,0.040244,0.040011,0.040743,0.  
039882,0.040477,0.040945,0.041256,0.040226,0.040469,0.040188,0.040448,  
0.040282,0.040313,0.040766,0.04029,0.040094,0.040601,0.040465,0.041032  
,0.040126,0.041294,0.040499,0.040014,0.040146,0.040978,0.040494,0.0407  
89,0.040222,0.040316,0.040557,0.040825,0.041107,0.040831,0.040053,0.04  
0316,0.040282,0.040529,0.040723,0.03983,0.040465,0.040768,0.041274,0.0.  
39909,0.040831,0.040154,0.040369,0.040181,0.040984,0.040622,0.04091,0.  
04058,0.040488,0.040259,0.040755,0.040822,0.040382,0.039968,0.040671,0.  
.040524,0.040247,0.040221,0.040387,0.040953,0.040846,0.040732,0.040279  
,0.040258,0.040559,0.040075,0.040398,0.040316,0.040864,0.040187,0.0408  
36,0.040282,0.040471,0.040536,0.040134,0.040605,0.040728,0.040407,0.04  
0943,0.040746,0.041174,0.040454,0.040577,0.041234,0.040575,0.039957,0.  
040709,0.039963,0.040968,0.039973,0.040869,0.040615,0.039606,0.040395,  
0.040531,0.040764,0.040635,0.041082,0.040628,0.040368,0.040333,0.04011  
4,0.039894,0.040198,0.041101,0.040077,0.040869,0.040079,0.040049,0.040  
636,0.040933,0.040692,0.040537,0.040519,0.040271,0.04019,0.040055,0.04  
0479,0.040277,0.040449,0.04076,0.040916,0.039933,0.040469,0.039338,0.0.  
40139,0.041116,0.040428,0.040232,0.04031,0.040717  
0.10735,0.10621,0.1064,0.10755,0.10925,0.10728,0.10804,0.1074,0.10769,  
0.10601,0.10707,0.1067,0.10711,0.1067,0.10656,0.10668,0.10766,0.10843,  
0.10737,0.10711,0.233,0.19557,0.21421,0.21833,0.10723,0.10788,0.10714,  
0.10637,0.1073,0.10704,0.10672,0.1062,0.10696,0.10685,0.10742,0.10641,  
0.10701,0.10597,0.106,0.37247,0.25241,0.21527,0.24742,0.22113,0.23923,  
0.23467,0.10681,0.10572,0.10675,0.1074,0.1065,0.10639,0.10803,0.10662,  
0.10658,0.10602,0.10651,0.10806,0.10657,0.10662,0.1069,0.3506,0.36321,  
0.22197,0.2659,0.22865,0.2386,0.25666,0.26601,0.22267,0.24665,0.10763,  
0.10682,0.10709,0.10724,0.1074,0.10644,0.10663,0.10721,0.10744,0.10727  
,0.10633,0.10758,0.10806,0.10704,0.10763,0.3564,0.36187,0.35176,0.2374  
3,0.22041,0.23966,0.25775,0.20341,0.22955,0.2276,0.24852,0.23028,0.106  
04,0.10669,0.1072,0.1068,0.10725,0.10662,0.10733,0.10577,0.10674,0.107  
24,0.10662,0.1077,0.10645,0.10699,0.10704,0.10631,0.36202,0.35878,0.35  
678,0.3538,0.23274,0.23258,0.23874,0.22504,0.25149,0.23096,0.22859,0.2  
3046,0.25492,0.24156,0.10667,0.10735,0.1068,0.10698,0.10687,0.10616,0.  
10714,0.10596,0.10765,0.10641,0.10857,0.10774,0.10749,0.10689,0.10751,  
0.10728,0.34631,0.35582,0.36107,0.3592,0.36263,0.36537,0.23277,0.22257  
,0.22055,0.23064,0.22872,0.23645,0.22662,0.23351,0.23649,0.24781,0.106

32,0.10715,0.10714,0.10771,0.10708,0.10722,0.10774,0.107,0.10692,0.107  
05,0.10624,0.10643,0.10851,0.10662,0.10596,0.10758,0.1069,0.34814,0.35  
454,0.3495,0.36836,0.35952,0.36897,0.22522,0.24223,0.23172,0.23145,0.2  
1683,0.22966,0.21928,0.17385,0.21943,0.2451,0.2334,0.10601,0.10704,0.1  
0789,0.10623,0.10701,0.10498,0.10686,0.10711,0.10746,0.10629,0.10723,0  
.10637,0.10661,0.073925,0.061779,0.080117,0.10635,0.35534,0.3618,0.354  
75,0.35881,0.36233,0.35738,0.33288,0.23226,0.23298,0.22929,0.21887,0.2  
3269,0.23286,0.21111,0.2393,0.23989,0.24479,0.23703,0.10655,0.10649,0.  
10641,0.10729,0.10692,0.10647,0.10811,0.10712,0.10694,0.1075,0.10684,0  
.07262,0.068469,0.078316,0.058307,0.069396,0.075108,0.10696,0.35913,0.  
3581,0.35566,0.35814,0.35431,0.35502,0.36317,0.23699,0.23929,0.23281,0  
.23305,0.20263,0.22064,0.21404,0.2231,0.25093,0.27272,0.21719,0.10712,  
0.10714,0.10686,0.10642,0.10761,0.10777,0.10625,0.10743,0.10662,0.0671  
36,0.074562,0.072711,0.068838,0.0819,0.069636,0.073109,0.073264,0.0832  
76,0.10729,0.35957,0.35595,0.34514,0.36072,0.36447,0.36653,0.35366,0.2  
7086,0.22885,0.226,0.23027,0.23303,0.24736,0.23623,0.23825,0.23361,0.2  
1697,0.22857,0.23105,0.10643,0.10819,0.10782,0.10717,0.10748,0.10796,0  
.078515,0.071363,0.071808,0.075719,0.073366,0.070044,0.075464,0.077155  
,0.075322,0.073663,0.072993,0.07402,0.35215,0.35551,0.35504,0.35734,0.  
34363,0.36071,0.35966,0.19848,0.2005,0.19942,0.23857,0.22696,0.22677,0  
.22633,0.22698,0.22579,0.22418,0.22342,0.25641,0.10691,0.10735,0.10685  
,0.078347,0.075156,0.076124,0.072766,0.065714,0.082142,0.069837,0.0680  
3,0.074434,0.071622,0.074274,0.073053,0.074694,0.067619,0.075943,0.354  
01,0.35107,0.36058,0.3516,0.36537,0.35508,0.36621,0.35647,0.3519,0.231  
11,0.2191,0.22913,0.22616,0.20784,0.22761,0.24586,0.27231,0.23135,0.21  
929,0.21052,0.077489,0.0645,0.070212,0.075918,0.072201,0.071619,0.0714  
56,0.073503,0.070639,0.073301,0.070675,0.073482,0.07469,0.073686,0.073  
873,0.074189,0.070318,0.069293,0.36142,0.35823,0.35675,0.36354,0.35123  
,0.37018,0.35802,0.35382,0.35233,0.22766,0.23127,0.16892,0.15977,0.179  
09,0.16814,0.1738,0.16412,0.16769,0.17522,0.1643,0.074082,0.072344,0.0  
75492,0.074377,0.075868,0.069293,0.073303,0.064534,0.076936,0.069425,0  
.078903,0.074367,0.073674,0.071518,0.073313,0.078303,0.076294,0.071874  
,0.35336,0.35763,0.35036,0.35895,0.34996,0.36253,0.35347,0.36312,0.355  
63,0.20152,0.17766,0.16778,0.16225,0.17812,0.17011,0.1611,0.18085,0.17  
285,0.17076,0.17396,0.078152,0.064263,0.073187,0.066662,0.07705,0.0741  
92,0.074014,0.064461,0.072616,0.073974,0.086911,0.072239,0.073274,0.07  
1265,0.081287,0.078573,0.073669,0.071771,0.36165,0.35252,0.36234,0.365  
9,0.35596,0.36064,0.36323,0.17247,0.18364,0.19961,0.17435,0.17034,0.19  
162,0.14577,0.1691,0.17301,0.17309,0.16329,0.17713,0.15203,0.073307,0.  
072961,0.071385,0.072668,0.070529,0.068867,0.079807,0.075194,0.07304,0  
.072537,0.071371,0.073856,0.072695,0.073819,0.076932,0.072866,0.065237  
,0.071559,0.35909,0.35279,0.3554,0.35565,0.35759,0.35926,0.19622,0.206  
12,0.19131,0.20166,0.1991,0.16308,0.16199,0.17614,0.16484,0.16236,0.17  
365,0.17919,0.15246,0.18144,0.082277,0.07266,0.073619,0.079967,0.06656  
3,0.077486,0.074212,0.073217,0.070767,0.072242,0.073642,0.073372,0.079  
773,0.072425,0.069937,0.078281,0.079283,0.073486,0.35572,0.35999,0.361  
8,0.36344,0.36342,0.24521,0.20194,0.14859,0.19347,0.21924,0.20728,0.17  
498,0.13483,0.17237,0.17275,0.16798,0.16971,0.16517,0.16992,0.18643,0.  
071962,0.073332,0.074039,0.078465,0.071098,0.0739,0.073939,0.067907,0.  
081096,0.074516,0.077769,0.068061,0.071115,0.083586,0.070424,0.069806,  
0.072814,0.068124,0.356,0.35483,0.36009,0.16168,0.20471,0.19287,0.1683  
8,0.20309,0.20006,0.18825,0.19986,0.15472,0.16224,0.1755,0.1717,0.1668

8,0.14595,0.17465,0.15022,0.17969,0.066128,0.06774,0.074509,0.079132,0.074038,0.074121,0.075695,0.072911,0.067056,0.074593,0.07067,0.07467,0.080561,0.073124,0.075026,0.074414,0.074004,0.073341,0.36435,0.18283,0.19943,0.20363,0.19892,0.24374,0.15994,0.20019,0.19294,0.23123,0.16356,0.13219,0.17775,0.1568,0.18016,0.16267,0.17826,0.13817,0.16792,0.073148,0.073526,0.068428,0.072589,0.07328,0.07023,0.069359,0.078632,0.080669,0.068364,0.0749,0.074177,0.069572,0.075078,0.068003,0.076882,0.084471,0.04013,0.19776,0.20086,0.20237,0.20307,0.20055,0.2066,0.19066,0.23259,0.16396,0.22641,0.18637,0.17527,0.17261,0.16846,0.14612,0.1672,0.17708,0.1679,0.1366,0.072959,0.071142,0.076092,0.072522,0.080392,0.072175,0.072795,0.073905,0.075096,0.073823,0.073236,0.066435,0.063176,0.073083,0.07387,0.069861,0.069048,0.040219,0.23551,0.20334,0.20029,0.21483,0.20425,0.20297,0.19022,0.20186,0.19171,0.19974,0.17134,0.18665,0.18733,0.16833,0.18405,0.1694,0.14141,0.17644,0.069365,0.070308,0.068958,0.069355,0.073568,0.073608,0.076834,0.073469,0.075885,0.07047,0.094707,0.068676,0.077112,0.076399,0.074512,0.064764,0.073718,0.073131,0.040445,0.23562,0.1921,0.16923,0.23354,0.1849,0.20366,0.18847,0.18747,0.20369,0.21235,0.17254,0.17469,0.17488,0.17158,0.17245,0.1825,0.18087,0.16848,0.068066,0.071529,0.079843,0.074053,0.059079,0.075988,0.073799,0.079557,0.070291,0.080433,0.077286,0.080924,0.075758,0.070664,0.073869,0.069916,0.067953,0.039891,0.040334,0.039882,0.17941,0.18512,0.19214,0.20625,0.22649,0.19198,0.20022,0.21136,0.1992,0.161,0.18146,0.17032,0.19976,0.17884,0.15768,0.074128,0.073266,0.073919,0.06889,0.074156,0.077004,0.065659,0.073119,0.084896,0.073575,0.072776,0.074137,0.073534,0.072485,0.087264,0.079644,0.071639,0.072396,0.039973,0.039784,0.040257,0.04016,0.16381,0.15794,0.23795,0.2109,0.2141,0.2001,0.20231,0.11061,0.19923,0.19356,0.13733,0.16667,0.073531,0.073236,0.06927,0.070541,0.070143,0.072808,0.073619,0.075056,0.070228,0.068214,0.073011,0.077221,0.068053,0.072821,0.074112,0.073955,0.076521,0.070217,0.078991,0.074011,0.039625,0.040555,0.039955,0.040607,0.040368,0.039681,0.23332,0.20537,0.20279,0.20663,0.21025,0.25023,0.1963,0.19479,0.073877,0.078771,0.066571,0.07919,0.067628,0.073743,0.074161,0.070487,0.076099,0.073251,0.074702,0.076268,0.072307,0.073296,0.073761,0.073657,0.070672,0.074687,0.071932,0.086232,0.069023,0.073186,0.073605,0.040471,0.040758,0.040078,0.040111,0.040142,0.039832,0.20373,0.19394,0.1957,0.21642,0.20108,0.03948,0.039615,0.068951,0.071134,0.071188,0.072943,0.071156,0.074054,0.073864,0.073031,0.072636,0.075446,0.074868,0.073507,0.070502,0.066765,0.077945,0.078042,0.081129,0.073829,0.07686,0.072792,0.074353,0.039673,0.039732,0.040072,0.040453,0.040432,0.040256,0.040212,0.040486,0.039798,0.04027,0.21339,0.21198,0.039842,0.040289,0.040402,0.040396,0.072656,0.073442,0.070285,0.076889,0.069313,0.080085,0.074048,0.070051,0.072834,0.073572,0.074651,0.079991,0.076598,0.073271,0.069872,0.070026,0.074066,0.076651,0.072644,0.040146,0.039907,0.039884,0.039872,0.040062,0.040246,0.040491,0.040288,0.04006,0.039927,0.040853,0.040363,0.039453,0.039767,0.040044,0.039823,0.040263,0.072905,0.070766,0.073657,0.073287,0.070875,0.073946,0.074581,0.073453,0.073754,0.081056,0.069445,0.077432,0.073655,0.077556,0.077388,0.073107,0.039455,0.040623,0.039908,0.040396,0.040158,0.040117,0.039967,0.040553,0.039749,0.04041,0.040358,0.039585,0.039653,0.039558,0.04016,0.039446,0.039332,0.039928,0.040005,0.077751,0.073438,0.068871,0.069158,0.072493,0.067013,0.074831,0.068754,0.073535,0.066699,0.069903,0.07569,0.073529,0.040591,0.03975,0.03964,0.039942,0.040501,0.04016,0.039355,0.03963,0.039455,0.03986,0.040258,0.0







|         |         |         |         |         |         |         |
|---------|---------|---------|---------|---------|---------|---------|
| 0.48075 |         | 0.5     | 0.57615 | 0.41005 | 0.5     | 0.5     |
| 0.5     | 0.38919 |         | 0.5     | 0.5     | 0.42231 | 0.5     |
| 0.5     | 0.51853 |         | 0.5     | 0.51547 | 0.3845  | 0.6068  |
| 0       | 0       |         | 0       | 0       | 0       | 0       |
| 0       | 0       |         | 0       | 0       | 0       | 0.31193 |
| 0.31341 | 0.23375 |         | 0.33333 | 0.34245 | 0.33333 | 0.32196 |
| 0.33401 | 0.28525 |         | 0.45917 | 0.4597  | 0.53833 | 0.47219 |
| 0.52066 | 0.68409 |         | 0.49286 | 0.46065 | 0.43755 | 0.5     |
| 0.5     | 0.48506 | 0.52889 |         | 0.4974  | 0.55339 | 0.4916  |
| 0.49778 | 0.59002 |         | 0       | 0       | 0       | 0       |
| 0       | 0       |         | 0       | 0       | 0       | 0.5     |
| 0.33477 | 0.37636 |         | 0.35105 | 0.41553 | 0.3182  | 0.29294 |
| 0.24197 | 0.33464 |         | 0.30527 | 0.40255 | 0.60097 | 0.49014 |
| 0.52532 | 0.62556 |         | 0.50284 | 0.5     | 0.44976 | 0.56975 |
| 0.5     | 0.50604 | 0.56368 |         | 0.49971 | 0.43735 | 0.60807 |
| 0.47839 | 0.59968 |         | 0.54566 | 0.50721 | 0       | 0       |
| 0       | 0       |         | 0       | 0       | 0       | 0.46389 |
| 0.5     | 0.58454 | 0.23784 |         | 0.45355 | 0.33186 | 0.3646  |
| 0.36342 | 0.40095 |         | 0.297   | 0.30265 | 0.37709 | 0.33333 |
| 0.5     | 0.48562 |         | 0.5     | 0.5     | 0.47599 | 0.5     |
| 0.57724 |         | 0.5     | 0.48333 | 0.532   | 0.63766 | 0.5     |
| 0.42342 | 0.50944 |         | 0.46412 | 0.48804 | 0.48943 | 0.62222 |
| 0       | 0       |         | 0       | 0       | 0       | 0       |
| 0.5     | 0.5     | 0.52303 |         | 0.52393 | 0.49839 | 0.29243 |
| 0.40815 | 0.42961 |         | 0.23506 | 0.37422 | 0.37117 | 0.37409 |
| 0.36466 | 0.33333 |         | 0.47886 | 0.4281  | 0.44523 | 0.46261 |
| 0.5     | 0.5     | 0.52906 |         | 0.4711  | 0.45403 | 0.39615 |
| 0.53187 | 0.46065 |         | 0.5     | 0.50717 | 0.68404 | 0.56553 |
| 0.51956 | 0.49663 |         | 0       | 0       | 0       | 0       |
| 0       | 0.50581 |         | 0.5     | 0.53897 | 0.5     | 0.5     |
| 0.5     | 0.33333 | 0.29497 |         | 0.30915 | 0.36841 | 0.33333 |
| 0.35477 | 0.38493 |         | 0.24377 | 0.34225 | 0.47117 | 0.51826 |
| 0.56488 | 0.46099 |         | 0.6328  | 0.41002 | 0.53219 | 0.58474 |
| 0.51586 |         | 0.5     | 0.51588 | 0.55394 | 0.5     | 0.5316  |
| 0.57274 | 0.50184 |         | 0.61406 |         | 0.5     | 0       |
| 0       | 0.5     | 0.39518 |         | 0.5     | 0.49456 | 0.49037 |
| 0.379   | 0.56709 |         | 0.55431 | 0.27876 | 0.31422 | 0.35253 |
| 0.33333 | 0.33333 |         | 0.33333 | 0.29319 | 0.33581 | 0.31359 |
| 0.5     | 0.5     |         | 0.5     | 0.54497 | 0.48532 | 0.36745 |
| 0.50019 |         | 0.5     | 0.5     | 0.5     | 0.58126 | 0.5     |
| 0.52342 | 0.4465  |         | 0.7282  | 0.52064 | 0.5     | 0.36135 |
| 0       | 0.5     | 0.32919 |         | 0.49481 | 0.42068 | 0.54187 |
| 0.45977 | 0.49813 |         | 0.50525 | 0.54    | 0.24076 | 0.44077 |
| 0.32478 | 0.33333 |         | 0.30564 | 0.26969 | 0.40034 | 0.20922 |
| 0.33333 | 0.53121 |         | 0.56946 | 0.35462 | 0.5     | 0.45457 |
| 0.66764 |         | 0.5     | 0.48693 | 0.5     | 0.43547 | 0.50383 |
| 0.45941 | 0.52445 |         | 0.52148 | 0.5     | 0.49112 | 0.49249 |
| 1       | 0.40879 | 0.54051 |         | 0.39967 | 0.52708 | 0.4875  |
| 0.5     | 0.4586  | 0.52086 |         | 0.5     | 0.44125 | 0.33742 |
| 0.35132 | 0.3488  |         | 0.38838 | 0.39724 | 0.34419 | 0.31482 |
| 0.35521 | 0.33333 |         | 0.49699 | 0.45716 | 0.5     | 0.47489 |
| 0.51021 | 0.4397  |         | 0.5     | 0.55703 | 0.5     | 0.52404 |

|         |         |         |         |         |         |
|---------|---------|---------|---------|---------|---------|
| 0.5     | 0.37582 | 0.41332 | 0.43064 | 0.42498 | 0.5     |
| 0.5     | 1       | 0.55875 | 0.49976 | 0.5     | 0.50031 |
| 0.45782 | 0.44472 | 0.34579 | 0.6079  | 0.43768 | 0.5     |
| 0.35994 | 0.34617 | 0.3467  | 0.35237 | 0.37464 | 0.23054 |
| 0.37966 | 0.36532 | 0.44201 | 0.65711 | 0.52027 | 0.4696  |
| 0.48389 | 0.5     | 0.48574 | 0.5     | 0.36631 | 0.54556 |
| 0.5     | 0.5     | 0.5     | 0.36022 | 0.52904 | 0.6306  |
| 0.5     | 0.50644 | 1       | 0.49014 | 0.5     | 0.53605 |
| 0.50676 | 0.5     | 0.40395 | 0.65269 | 0.56702 | 0.54463 |
| 0.50496 | 0.33831 | 0.28527 | 0.28449 | 0.33363 | 0.35287 |
| 0.335   | 0.32158 | 0.34822 | 0.53612 | 0.59599 | 0.51917 |
| 0.62705 | 0.53978 | 0.54749 | 0.51401 | 0.51931 | 0.43857 |
| 0.4989  | 0.43488 | 0.3594  | 0.5     | 0.51356 | 0.47763 |
| 0.53883 | 0.45325 | 1       | 1       | 1       | 0.48915 |
| 0.43805 | 0.59325 | 0.5     | 0.51134 | 0.5     | 0.5     |
| 0.5     | 0.5     | 0.35484 | 0.31175 | 0.33333 | 0.41077 |
| 0.33333 | 0.38544 | 0.48934 | 0.52847 | 0.56456 | 0.43661 |
| 0.56219 | 0.44638 | 0.5     | 0.56016 | 0.5     | 0.3962  |
| 0.60563 | 0.54267 | 0.5     | 0.47302 | 0.5     | 0.47452 |
| 0.53467 | 0.44638 | 1       | 1       | 1       | 1       |
| 0.5     | 0.46414 | 0.52367 | 0.57376 | 0.49107 | 0.43014 |
| 0.57294 | 0.46136 | 0.50245 | 0.29941 | 0.33333 | 0.3523  |
| 0.4457  | 0.5     | 0.5     | 0.53992 | 0.5     | 0.55524 |
| 0.42329 | 0.5     | 0.50339 | 0.5774  | 0.5     | 0.57857 |
| 0.44455 | 0.3624  | 0.5568  | 0.5     | 0.52927 | 0.48581 |
| 0.45448 | 0.37352 | 1       | 1       | 1       | 1       |
| 1       | 1       | 0.48264 | 0.48685 | 0.45258 | 0.40954 |
| 0.51632 | 0.55164 | 0.5     | 0.37636 | 0.45842 | 0.5     |
| 0.5     | 0.5     | 0.51933 | 0.5     | 0.59292 | 0.46527 |
| 0.64568 | 0.53718 | 0.56705 | 0.55396 | 0.50646 | 0.5     |
| 0.52251 | 0.52016 | 0.5     | 0.43607 | 0.5     | 0.5342  |
| 0.5     | 0.5     | 0.46887 | 1       | 1       | 1       |
| 1       | 1       | 1       | 0.5     | 0.52542 | 0.56691 |
| 0.5     | 0.49    | 1       | 1       | 0.44825 | 0.38806 |
| 0.5     | 0.47746 | 0.57261 | 0.48428 | 0.5     | 0.5     |
| 0.45324 | 0.48089 | 0.41926 | 0.49552 | 0.6145  | 0.46794 |
| 0.42079 | 0.5     | 0.5     | 0.51737 | 0.47415 | 0.38507 |
| 0.45478 | 1       | 1       | 1       | 1       | 1       |
| 1       | 1       | 1       | 1       | 1       | 0.50355 |
| 0.46963 | 1       | 1       | 1       | 1       | 0.4956  |
| 0.5     | 0.59328 | 0.58868 | 0.72512 | 0.50914 | 0.40882 |
| 0.6184  | 0.60852 | 0.51956 | 0.56269 | 0.49008 | 0.49118 |
| 0.49883 | 0.44935 | 0.36651 | 0.53247 | 0.54966 | 0.5     |
| 1       | 1       | 1       | 1       | 1       | 1       |
| 1       | 1       | 1       | 1       | 1       | 1       |
| 1       | 1       | 1       | 1       | 1       | 0.54563 |
| 0.52684 | 0.5     | 0.5     | 0.5374  | 0.5     | 0.42135 |
| 0.48462 | 0.46569 | 0.47647 | 0.59543 | 0.5     | 0.36757 |
| 0.43166 | 0.5     | 0.54165 | 1       | 1       | 1       |
| 1       | 1       | 1       | 1       | 1       | 1       |
| 1       | 1       | 1       | 1       | 1       | 1       |
| 1       | 1       | 1       | 1       | 0.5     | 0.51918 |



|         |  |         |  |         |         |     |         |  |         |
|---------|--|---------|--|---------|---------|-----|---------|--|---------|
| 0.61844 |  | 0.5     |  | 0.5     | 0.59796 |     | 1       |  | 1       |
| 1       |  | 1       |  | 1       | 1       |     | 1       |  | 1       |
| 1       |  | 1       |  | 1       | 1       |     | 1       |  | 1       |
| 1       |  | 0       |  | 0       | 0.51302 |     | 0.54543 |  | 0.52012 |
| 0.50093 |  | 0.5     |  | 0.52728 |         | 0.5 | 0.53167 |  | 1       |
| 1       |  | 1       |  | 1       | 1       |     | 1       |  | 1       |
| 1       |  | 1       |  | 1       | 1       |     | 1       |  | 1       |
| 1       |  | 1       |  | 0       | 0       |     | 0       |  | 0.47601 |
| 0.43084 |  | 0.50959 |  | 0.54618 |         | 0.5 | 0.5     |  | 0.53609 |
| 0.66279 |  | 0.53931 |  | 1       |         | 1   | 1       |  | 1       |
| 1       |  | 1       |  | 1       | 1       |     | 1       |  | 1       |
| 1       |  | 1       |  | 1       | 1       |     | 1       |  | 1       |
| 0       |  | 0       |  | 0       | 0       |     | 0.5     |  | 0.54893 |
| 0.43573 |  | 0.58022 |  | 0.5     | 0.49127 |     | 0.43026 |  | 0.5     |
| 0.5     |  | 0.49612 |  | 1       | 1       |     | 1       |  | 1       |
| 1       |  | 1       |  | 1       | 1       |     | 1       |  | 1       |
| 1       |  | 1       |  | 1       | 1       |     | 1       |  | 1       |
| 0       |  | 0       |  | 0       | 0       |     | 0       |  | 0       |
| 0.56814 |  | 0.45089 |  | 0.5     | 0.51139 |     | 0.47999 |  | 0.49097 |
| 0.61675 |  | 0.60157 |  | 0.44065 | 0.50968 |     | 1       |  | 1       |
| 1       |  | 1       |  | 1       | 1       |     | 1       |  | 1       |
| 1       |  | 1       |  | 1       | 1       |     | 1       |  | 1       |
| 1       |  | 1       |  | 1       | 0       |     | 0       |  | 0       |
| 0       |  | 0       |  | 0       | 0.5351  |     | 0.5     |  | 0.4834  |
| 0.5     |  | 0.44524 |  | 0.5     | 0.5     |     | 0.5     |  | 0.5     |
| 0.44526 |  | 0.45735 |  | 1       | 1       |     | 1       |  | 1       |
| 1       |  | 1       |  | 1       | 1       |     | 1       |  | 1       |
| 1       |  | 1       |  | 1       | 0.42691 |     | 0.5     |  | 0.4563  |
| 1       |  | 0       |  | 0       | 0       |     | 0       |  | 0       |
| 0       |  | 0       |  | 0.49542 | 0.35381 |     | 0.55607 |  | 0.27262 |
| 0.5     |  | 0.47287 |  | 0.49911 | 0.49741 |     | 0.5     |  | 0.5     |
| 0.63289 |  | 1       |  | 1       | 1       |     | 1       |  | 1       |
| 1       |  | 1       |  | 1       | 1       |     | 1       |  | 1       |
| 0.5     |  | 0.5     |  | 0.5     | 0.52071 |     | 0.5     |  | 0.5     |
| 1       |  | 0       |  | 0       | 0       |     | 0       |  | 0       |
| 0       |  | 0       |  | 0.51418 | 0.51621 |     | 0.48077 |  | 0.45714 |
| 0.5869  |  | 0.49745 |  | 0.5547  | 0.47658 |     | 0.5     |  | 0.52007 |
| 0.52723 |  | 1       |  | 1       | 1       |     | 1       |  | 1       |
| 1       |  | 1       |  | 1       | 1       |     | 0.44204 |  | 0.45961 |
| 0.5     |  | 0.5     |  | 0.5     | 0.5     |     | 0.51024 |  | 0.54203 |
| 0.52684 |  | 1       |  | 0       | 0       |     | 0       |  | 0       |
| 0       |  | 0       |  | 0       | 0.42066 |     | 0.51138 |  | 0.52247 |
| 0.57637 |  | 0.53637 |  | 0.52626 | 0.57205 |     | 0.48017 |  | 0.5     |
| 0.50563 |  | 0.5696  |  | 0.48368 | 1       |     | 1       |  | 1       |
| 1       |  | 1       |  | 1       | 0.5     |     | 0.44316 |  | 0.56815 |
| 0.37333 |  | 0.45309 |  | 0.41372 | 0.52732 |     | 0.52743 |  | 0.59098 |
| 0.41031 |  | 0.5747  |  | 0.5     | 0       |     | 0       |  | 0       |
| 0       |  | 0       |  | 0       | 0       |     | 0.49674 |  | 0.4963  |
| 0.48347 |  | 0.5     |  | 0.48195 | 0.61877 |     | 0.44825 |  | 0.53472 |
| 0.4474  |  | 0.5     |  | 0.5     | 0.47239 |     | 1       |  | 1       |
| 1       |  | 0.52142 |  | 0.5     | 0.4144  |     | 0.4642  |  | 0.5     |
| 0.48043 |  | 0.5     |  | 0.46357 | 0.50789 |     | 0.58151 |  | 0.42443 |

|         |         |         |         |         |         |
|---------|---------|---------|---------|---------|---------|
| 0.50688 | 0.5344  | 0.56188 | 0.49467 | 0       | 0       |
| 0       | 0       | 0       | 0       | 0       | 0       |
| 0       | 0.57577 | 0.48629 | 0.37874 | 0.5     | 0.60449 |
| 0.49499 | 0.49113 | 0.51812 | 0.5     | 0.52504 | 0.49417 |
| 0.51925 | 0.5     | 0.42385 | 0.58995 | 0.5     | 0.5     |
| 0.5     | 0.61081 | 0.5     | 0.5     | 0.57769 | 0.5     |
| 0.5     | 0.48147 | 0.5     | 0.48453 | 0.6155  | 0.3932  |
| 0       | 0       | 0       | 0       | 0       | 0       |
| 0       | 0       | 0       | 0.5     | 0.50726 | 0.34404 |
| 0.35557 | 0.38312 | 0.33333 | 0.34245 | 0.33333 | 0.33902 |
| 0.33197 | 0.35737 | 0.54083 | 0.5403  | 0.46167 | 0.52781 |
| 0.47934 | 0.31591 | 0.50714 | 0.53935 | 0.56245 | 0.5     |
| 0.5     | 0.51494 | 0.47111 | 0.5026  | 0.44661 | 0.5084  |
| 0.50222 | 0.40998 | 0       | 0       | 0       | 0       |
| 0       | 0       | 0       | 0       | 0       | 0       |
| 0.33477 | 0.37636 | 0.35105 | 0.41553 | 0.3409  | 0.35353 |
| 0.3798  | 0.35006 | 0.34737 | 0.30681 | 0.39903 | 0.50986 |
| 0.47468 | 0.37444 | 0.49716 | 0.5     | 0.55024 | 0.43025 |
| 0.5     | 0.49396 | 0.43632 | 0.50029 | 0.56265 | 0.39193 |
| 0.52161 | 0.40032 | 0.45434 | 0.49279 | 0       | 0       |
| 0       | 0       | 0       | 0       | 0       | 0       |
| 0       | 0       | 0.38108 | 0.32315 | 0.31889 | 0.35497 |
| 0.33517 | 0.28396 | 0.36387 | 0.31529 | 0.24581 | 0.33333 |
| 0.5     | 0.51438 | 0.5     | 0.5     | 0.52401 | 0.5     |
| 0.42276 | 0.5     | 0.51667 | 0.468   | 0.36234 | 0.5     |
| 0.57658 | 0.49056 | 0.53588 | 0.51196 | 0.51057 | 0.37778 |
| 0       | 0       | 0       | 0       | 0       | 0       |
| 0       | 0       | 0       | 0       | 0       | 0.25162 |
| 0.28169 | 0.27211 | 0.42535 | 0.25157 | 0.25767 | 0.31334 |
| 0.27068 | 0.33333 | 0.52114 | 0.5719  | 0.55477 | 0.53739 |
| 0.5     | 0.5     | 0.47094 | 0.5289  | 0.54597 | 0.60385 |
| 0.46813 | 0.53935 | 0.5     | 0.49283 | 0.31596 | 0.43447 |
| 0.48044 | 0.50337 | 0       | 0       | 0       | 0       |
| 0       | 0       | 0       | 0       | 0       | 0       |
| 0       | 0.33333 | 0.40567 | 0.34543 | 0.32073 | 0.33333 |
| 0.30723 | 0.38493 | 0.48507 | 0.34225 | 0.52883 | 0.48174 |
| 0.43512 | 0.53901 | 0.3672  | 0.58998 | 0.46781 | 0.41526 |
| 0.48414 | 0.5     | 0.48412 | 0.44606 | 0.5     | 0.4684  |
| 0.42726 | 0.49816 | 0.38594 | 0.5     | 0       | 0       |
| 0       | 0       | 0       | 0       | 0       | 0       |
| 0       | 0       | 0       | 0.36474 | 0.36954 | 0.43021 |
| 0.33333 | 0.33333 | 0.33333 | 0.33642 | 0.33581 | 0.32851 |
| 0.5     | 0.5     | 0.5     | 0.45503 | 0.51468 | 0.63255 |
| 0.49981 | 0.5     | 0.5     | 0.5     | 0.41874 | 0.5     |
| 0.47658 | 0.5535  | 0.2718  | 0.47936 | 0.5     | 0.63865 |
| 0       | 0       | 0       | 0       | 0       | 0       |
| 0       | 0       | 0       | 0       | 0.37962 | 0.36464 |
| 0.35595 | 0.33333 | 0.42592 | 0.40603 | 0.40034 | 0.39539 |
| 0.33333 | 0.46879 | 0.43054 | 0.64538 | 0.5     | 0.54543 |
| 0.33236 | 0.5     | 0.51307 | 0.5     | 0.56453 | 0.49617 |
| 0.54059 | 0.47555 | 0.47852 | 0.5     | 0.50888 | 0.50751 |
| 0       | 0       | 0       | 0       | 0       | 0       |

|         |         |         |         |         |         |
|---------|---------|---------|---------|---------|---------|
| 0       | 0       | 0       | 0       | 0       | 0.33742 |
| 0.29737 | 0.3488  | 0.26236 | 0.44425 | 0.3991  | 0.35748 |
| 0.32847 | 0.33333 | 0.50301 | 0.54284 | 0.5     | 0.52511 |
| 0.48979 | 0.5603  | 0.5     | 0.44297 | 0.5     | 0.47596 |
| 0.5     | 0.62418 | 0.58668 | 0.56936 | 0.57502 | 0.5     |
| 0.5     | 0       | 0       | 0       | 0       | 0       |
| 0       | 0       | 0       | 0       | 0       | 0       |
| 0.28013 | 0.30766 | 0.3179  | 0.34676 | 0.25073 | 0.38473 |
| 0.32283 | 0.36532 | 0.55799 | 0.34289 | 0.47973 | 0.5304  |
| 0.51611 | 0.5     | 0.51426 | 0.5     | 0.63369 | 0.45444 |
| 0.5     | 0.5     | 0.5     | 0.63978 | 0.47096 | 0.3694  |
| 0.5     | 0.49356 | 0       | 0       | 0       | 0       |
| 0       | 0       | 0       | 0       | 0       | 0       |
| 0       | 0.33983 | 0.35609 | 0.34074 | 0.34934 | 0.31977 |
| 0.30423 | 0.353   | 0.34822 | 0.46388 | 0.40401 | 0.48083 |
| 0.37295 | 0.46022 | 0.45251 | 0.48599 | 0.48069 | 0.56143 |
| 0.5011  | 0.56512 | 0.6406  | 0.5     | 0.48644 | 0.52237 |
| 0.46117 | 0.54675 | 0       | 0       | 0       | 0       |
| 0       | 0       | 0       | 0       | 0       | 0       |
| 0       | 0       | 0.38961 | 0.34413 | 0.33333 | 0.24129 |
| 0.33333 | 0.28238 | 0.51066 | 0.47153 | 0.43544 | 0.56339 |
| 0.43781 | 0.55362 | 0.5     | 0.43984 | 0.5     | 0.6038  |
| 0.39437 | 0.45733 | 0.5     | 0.52698 | 0.5     | 0.52548 |
| 0.46533 | 0.55362 | 0       | 0       | 0       | 0       |
| 0       | 0       | 0       | 0       | 0       | 0       |
| 0       | 0       | 0       | 0.3503  | 0.33333 | 0.3325  |
| 0.5543  | 0.5     | 0.5     | 0.46008 | 0.5     | 0.44476 |
| 0.57671 | 0.5     | 0.49661 | 0.4226  | 0.5     | 0.42143 |
| 0.55545 | 0.6376  | 0.4432  | 0.5     | 0.47073 | 0.51419 |
| 0.54552 | 0.62648 | 0       | 0       | 0       | 0       |
| 0       | 0       | 0       | 0       | 0       | 0       |
| 0       | 0       | 0       | 0       | 0.54158 | 0.5     |
| 0.5     | 0.5     | 0.48067 | 0.5     | 0.40708 | 0.53473 |
| 0.35432 | 0.46282 | 0.43295 | 0.44604 | 0.49354 | 0.5     |
| 0.47749 | 0.47984 | 0.5     | 0.56393 | 0.5     | 0.4658  |
| 0.5     | 0.5     | 0.53113 | 0       | 0       | 0       |
| 0       | 0       | 0       | 0       | 0       | 0       |
| 0       | 0       | 0       | 0       | 0.55175 | 0.61194 |
| 0.5     | 0.52254 | 0.42739 | 0.51572 | 0.5     | 0.5     |
| 0.54676 | 0.51911 | 0.58074 | 0.50448 | 0.3855  | 0.53206 |
| 0.57921 | 0.5     | 0.5     | 0.48263 | 0.52585 | 0.61493 |
| 0.54522 | 0       | 0       | 0       | 0       | 0       |
| 0       | 0       | 0       | 0       | 0       | 0       |
| 0       | 0       | 0       | 0       | 0       | 0.5044  |
| 0.5     | 0.40672 | 0.41132 | 0.27488 | 0.49086 | 0.59118 |
| 0.3816  | 0.39148 | 0.48044 | 0.43731 | 0.50992 | 0.50882 |
| 0.50117 | 0.55065 | 0.63349 | 0.46753 | 0.45034 | 0.5     |
| 0       | 0       | 0       | 0       | 0       | 0       |
| 0       | 0       | 0       | 0       | 0       | 0       |
| 0       | 0       | 0       | 0       | 0       | 0.45437 |
| 0.47316 | 0.5     | 0.5     | 0.4626  | 0.5     | 0.57865 |
| 0.51538 | 0.53431 | 0.52353 | 0.40457 | 0.5     | 0.63243 |



|         |         |         |         |         |         |         |     |
|---------|---------|---------|---------|---------|---------|---------|-----|
| 0       | 0       | 0.5384  | 0.48351 | 0.66045 | 0.49174 |         |     |
| 0       | 0       | 0       | 0       | 0       | 0       |         |     |
| 0       | 0       | 0       | 0       | 0       | 0       |         |     |
| 0       | 0       | 0       | 1       | 0.5     | 0.46882 |         |     |
| 0.38156 | 0.5     | 0.5     | 0.40204 |         | 0       |         | 0   |
| 0       | 0       | 0       | 0       | 0       | 0       |         |     |
| 0       | 0       | 0       | 0       | 0       | 0       |         |     |
| 0       | 1       | 1       | 0.48698 | 0.45457 | 0.47988 |         |     |
| 0.49907 | 0.5     | 0.47272 |         | 0.5     | 0.46833 |         | 0   |
| 0       | 0       | 0       | 0       | 0       | 0       |         |     |
| 0       | 0       | 0       | 0       | 0       | 0       |         |     |
| 0       | 0       | 1       | 1       | 1       | 0.52399 |         |     |
| 0.56916 | 0.49041 | 0.45382 |         | 0.5     | 0.5     | 0.46391 |     |
| 0.33721 | 0.46069 | 0       |         | 0       | 0       |         | 0   |
| 0       | 0       | 0       | 0       | 0       | 0       |         |     |
| 0       | 0       | 0       | 0       | 0       | 0       |         |     |
| 1       | 1       | 1       | 1       | 0.5     | 0.45107 |         |     |
| 0.56427 | 0.41978 | 0.5     | 0.50873 | 0.56974 |         |         | 0.5 |
| 0.5     | 0.50388 | 0       | 0       | 0       |         |         | 0   |
| 0       | 0       | 0       | 0       | 0       | 0       |         |     |
| 0       | 0       | 0       | 0       | 0       | 0       |         |     |
| 1       | 1       | 1       | 1       | 1       | 1       |         |     |
| 0.43186 | 0.54911 | 0.5     | 0.48861 | 0.52001 | 0.50903 |         |     |
| 0.38325 | 0.39843 | 0.55935 | 0.49032 |         | 0       |         | 0   |
| 0       | 0       | 0       | 0       | 0       | 0       |         |     |
| 0       | 0       | 0       | 0       | 0       | 0       |         |     |
| 0       | 0       | 0       | 1       | 1       | 1       |         |     |
| 1       | 1       | 1       | 0.4649  | 0.5     | 0.5166  |         |     |
| 0.5     | 0.55476 | 0.5     | 0.5     | 0.5     | 0.5     |         |     |
| 0.55474 | 0.54265 | 0       | 0       | 0       | 0       |         | 0   |
| 0       | 0       | 0       | 0       | 0       | 0       |         |     |
| 0       | 0       | 0       | 0       | 0       | 0       |         |     |
| 0       | 1       | 1       | 1       | 1       | 1       |         |     |
| 1       | 1       | 0.50458 | 0.64619 | 0.44393 | 0.72738 |         |     |
| 0.5     | 0.52713 | 0.50089 | 0.50259 | 0.5     | 0.5     |         |     |
| 0.36711 | 0       | 0       | 0       | 0       | 0       |         | 0   |
| 0       | 0       | 0       | 0       | 0       | 0       |         |     |
| 0       | 0       | 0       | 0       | 0       | 0       |         |     |
| 0       | 1       | 1       | 1       | 1       | 1       |         |     |
| 1       | 1       | 0.48582 | 0.48379 | 0.51923 | 0.54286 |         |     |
| 0.4131  | 0.50255 | 0.4453  | 0.52342 | 0.5     | 0.47993 |         |     |
| 0.47277 | 0       | 0       | 0       | 0       | 0       |         | 0   |
| 0       | 0       | 0       | 0       | 0       | 0       |         |     |
| 0       | 0       | 0       | 0       | 0       | 0       |         |     |
| 0       | 0       | 1       | 1       | 1       | 1       |         |     |
| 1       | 1       | 1       | 0.57934 | 0.48862 | 0.47753 |         |     |
| 0.42363 | 0.46363 | 0.47374 | 0.42795 | 0.51983 |         |         | 0.5 |
| 0.49437 | 0.4304  | 0.51632 |         | 0       | 0       |         | 0   |
| 0       | 0       | 0       | 0       | 0       | 0       |         |     |
| 0       | 0       | 0       | 0       | 0       | 0       |         |     |
| 0       | 0       | 0       | 1       | 1       | 1       |         |     |
| 1       | 1       | 1       | 1       | 0.50326 | 0.5037  |         |     |



|         |         |         |         |         |         |         |
|---------|---------|---------|---------|---------|---------|---------|
| 0.51653 |         | 0.5     | 0.51805 | 0.38123 | 0.55175 | 0.46528 |
| 0.5526  |         | 0.5     | 0.5     | 0.52761 | 0       | 0       |
| 0       | 0       |         | 0       | 0       | 0       | 0       |
| 0       | 0       |         | 0       | 0       | 0       | 0       |
| 0       | 0       |         | 0       | 0       | 1       | 1       |
| 1       | 1       |         | 1       | 1       | 1       | 1       |
| 1       | 0.42423 | 0.51371 | 0.62126 |         | 0.5     | 0.39551 |
| 0.50501 | 0.50887 | 0.48188 |         | 0.5     | 0.47496 | 0.50583 |
| 0       | 0       | 0       | 0       | 0       | 0       | 0       |
| 0       | 0       | 0       | 0       | 0       | 0       | 0       |
| 0       | 0       | 0       | 0       | 0       | 0       | 0       |
| 1       | 1       | 1       | 1       | 1       | 1       | 1       |
| 1       | 1       | 1       |         | 0.5     | 0.49274 | 0.34404 |
| 0.33102 | 0.38312 | 0.33333 | 0.31511 | 0.33333 | 0.33333 | 0.33902 |
| 0.33401 | 0.35737 | 0       | 0       | 0       | 0       | 0       |
| 0       | 0       | 0       | 0       | 0       | 0       | 0       |
| 0       | 0       | 0       | 0       | 0       | 0       | 0       |
| 0       | 0       | 1       | 1       | 1       | 1       | 1       |
| 1       | 1       | 1       | 1       | 1       |         | 0.5     |
| 0.33047 | 0.24728 | 0.2979  | 0.16894 | 0.3409  |         | 0.35353 |
| 0.37823 | 0.3153  | 0.34737 | 0.29064 |         | 0       | 0       |
| 0       | 0       | 0       | 0       | 0       | 0       | 0       |
| 0       | 0       | 0       | 0       | 0       | 0       | 0       |
| 0       | 0       | 0       | 0       | 0       | 1       | 1       |
| 1       | 1       | 1       | 1       | 1       | 1       | 0.53611 |
| 0.5     | 0.41546 | 0.38108 | 0.22331 | 0.34925 |         | 0.28043 |
| 0.30141 | 0.3151  | 0.33913 | 0.38206 | 0.37709 |         | 0.33333 |
| 0       | 0       | 0       | 0       | 0       | 0       | 0       |
| 0       | 0       | 0       | 0       | 0       | 0       | 0       |
| 0       | 0       | 0       | 0       | 0       | 0       | 0       |
| 1       | 1       | 1       | 1       | 1       | 1       | 1       |
| 0.5     | 0.5     | 0.47697 | 0.47607 | 0.50161 |         | 0.45595 |
| 0.31015 | 0.29828 | 0.3396  | 0.37422 | 0.37117 |         | 0.31256 |
| 0.36466 | 0.33333 | 0       | 0       | 0       | 0       | 0       |
| 0       | 0       | 0       | 0       | 0       | 0       | 0       |
| 0       | 0       | 0       | 0       | 0       | 0       | 0       |
| 0       | 0       | 1       | 1       | 1       | 1       | 1       |
| 1       | 0.49419 | 0.5     | 0.46103 | 0.5     |         | 0.5     |
| 0.5     | 0.33333 | 0.29937 | 0.34543 | 0.31086 |         | 0.33333 |
| 0.338   | 0.23014 | 0.27116 | 0.31549 |         | 0       | 0       |
| 0       | 0       | 0       | 0       | 0       | 0       | 0       |
| 0       | 0       | 0       | 0       | 0       | 0       | 0       |
| 0       | 0       | 0       | 0       | 0       | 1       | 1       |
| 1       | 0.5     | 0.60482 | 0.5     | 0.50544 |         | 0.50963 |
| 0.621   | 0.43291 | 0.44569 | 0.3565  | 0.31624 |         | 0.21725 |
| 0.33333 | 0.33333 | 0.33333 | 0.3704  | 0.32838 |         | 0.35789 |
| 0       | 0       | 0       | 0       | 0       | 0       | 0       |
| 0       | 0       | 0       | 0       | 0       | 0       | 0       |
| 0       | 0       | 0       | 0       | 0       | 0       | 0       |
| 1       | 0.5     | 0.67081 | 0.50519 | 0.57932 |         | 0.45813 |
| 0.54023 | 0.50187 | 0.49475 | 0.46    | 0.37962 |         | 0.19459 |
| 0.31927 | 0.33333 | 0.26844 | 0.32428 | 0.19931 |         | 0.39539 |

|         |         |         |  |         |  |         |  |         |  |         |
|---------|---------|---------|--|---------|--|---------|--|---------|--|---------|
| 0.33333 |         | 0       |  | 0       |  | 0       |  | 0       |  | 0       |
| 0       |         | 0       |  | 0       |  | 0       |  | 0       |  | 0       |
| 0       |         | 0       |  | 0       |  | 0       |  | 0       |  | 0       |
| 0       | 0.59121 | 0.45949 |  | 0.60033 |  | 0.47292 |  | 0.5125  |  |         |
| 0.5     | 0.5414  | 0.47914 |  | 0.5     |  | 0.55875 |  | 0.32515 |  |         |
| 0.35132 | 0.30239 | 0.34927 |  | 0.1585  |  | 0.25671 |  | 0.3277  |  |         |
| 0.31632 | 0.33333 |         |  | 0       |  | 0       |  | 0       |  | 0       |
| 0       |         | 0       |  | 0       |  | 0       |  | 0       |  | 0       |
| 0       |         | 0       |  | 0       |  | 0       |  | 0       |  | 0       |
| 0       |         | 0.44125 |  | 0.50024 |  | 0.5     |  | 0.49969 |  |         |
| 0.54218 | 0.55528 | 0.65421 |  | 0.3921  |  | 0.56232 |  | 0.5     |  |         |
| 0.35994 | 0.34617 | 0.33539 |  | 0.30087 |  | 0.37464 |  | 0.38473 |  |         |
| 0.29752 | 0.26936 |         |  | 0       |  | 0       |  | 0       |  | 0       |
| 0       |         | 0       |  | 0       |  | 0       |  | 0       |  | 0       |
| 0       |         | 0       |  | 0       |  | 0       |  | 0       |  | 0       |
| 0       |         | 0       |  | 0.50986 |  | 0.5     |  | 0.46395 |  |         |
| 0.49324 |         | 0.5     |  | 0.59605 |  | 0.34731 |  | 0.43298 |  | 0.45537 |
| 0.49504 | 0.32186 | 0.35864 |  | 0.37478 |  | 0.31704 |  | 0.32736 |  |         |
| 0.36077 | 0.32542 | 0.30356 |  |         |  | 0       |  | 0       |  | 0       |
| 0       |         | 0       |  | 0       |  | 0       |  | 0       |  | 0       |
| 0       |         | 0       |  | 0       |  | 0       |  | 0       |  | 0       |
| 0       |         | 0       |  | 0       |  | 0       |  | 0.51085 |  |         |
| 0.56195 | 0.40675 |         |  | 0.5     |  | 0.48866 |  | 0.5     |  | 0.5     |
| 0.5     | 0.5     | 0.25555 |  | 0.34413 |  | 0.33333 |  | 0.34794 |  |         |
| 0.33333 | 0.33218 |         |  | 0       |  | 0       |  | 0       |  | 0       |
| 0       |         | 0       |  | 0       |  | 0       |  | 0       |  | 0       |
| 0       |         | 0       |  | 0       |  | 0       |  | 0       |  | 0       |
| 0       |         | 0       |  | 0       |  | 0       |  | 0       |  | 0       |
| 0.5     | 0.53586 | 0.47633 |  | 0.42624 |  | 0.50893 |  | 0.56986 |  |         |
| 0.42706 | 0.53864 | 0.49755 |  | 0.3503  |  | 0.33333 |  | 0.3152  |  |         |
| 0       |         | 0       |  | 0       |  | 0       |  | 0       |  | 0       |
| 0       |         | 0       |  | 0       |  | 0       |  | 0       |  | 0       |
| 0       |         | 0       |  | 0       |  | 0       |  | 0       |  | 0       |
| 0       |         | 0       |  | 0       |  | 0       |  | 0       |  | 0       |
| 0       |         | 0.51736 |  | 0.51315 |  | 0.54742 |  | 0.59046 |  |         |
| 0.48368 | 0.44836 |         |  | 0.5     |  | 0.62364 |  | 0       |  | 0       |
| 0       |         | 0       |  | 0       |  | 0       |  | 0       |  | 0       |
| 0       |         | 0       |  | 0       |  | 0       |  | 0       |  | 0       |
| 0       |         | 0       |  | 0       |  | 0       |  | 0       |  | 0       |
| 0       |         | 0       |  | 0       |  | 0       |  | 0       |  | 0       |
| 0       |         | 0       |  | 0.5     |  | 0.47458 |  | 0.43309 |  |         |
| 0.5     | 0.51    |         |  | 0       |  | 0       |  | 0       |  | 0       |
| 0       |         | 0       |  | 0       |  | 0       |  | 0       |  | 0       |
| 0       |         | 0       |  | 0       |  | 0       |  | 0       |  | 0       |
| 0       |         | 0       |  | 0       |  | 0       |  | 0       |  | 0       |
| 0       |         | 0       |  | 0       |  | 0       |  | 0       |  | 0       |
| 0       |         | 0       |  | 0       |  | 0       |  | 0.49645 |  |         |
| 0.53037 |         | 0       |  | 0       |  | 0       |  | 0       |  | 0       |
| 0       |         | 0       |  | 0       |  | 0       |  | 0       |  | 0       |
| 0       |         | 0       |  | 0       |  | 0       |  | 0       |  | 0       |
| 0       |         | 0       |  | 0       |  | 0       |  | 0       |  | 0       |
| 0       |         | 0       |  | 0       |  | 0       |  | 0       |  | 0       |



0            0            0            0            0            0  
0

gtTCf=

0  
0.1908  
0.21796  
0.19252  
0.15724  
0.12639  
0.10315  
0.086848  
0.075855  
0.068599  
0.063857  
0.060755  
0.058703  
0.057315  
0.056342  
0.055627  
0.055072  
0.054617

gtTCs=

0  
0.11925  
0.16824  
0.18061  
0.17524  
0.16239  
0.14746  
0.13307  
0.12035  
0.10964  
0.10088  
0.093851  
0.08828  
0.08389  
0.08044  
0.077724  
0.075577  
0.073866

gtTCp=

0  
2.385  
1.5979  
1.1196  
0.8287  
0.65143  
0.54309  
0.47655

0.43538  
0.4096  
0.39316  
0.38239  
0.37506  
0.36982  
0.36585  
0.36266  
0.35995  
0.35753

X\_mask=

0.00051182,0.0057893,0.0010368,0.002745,0.0016492,2.2204e-016,2.2204e-016,0.00245,2.2204e-016,2.2204e-016,0.0076532,0.0057538,0.0086345,0.0053954,2.2204e-016,2.2204e-016,0.0020597,0.0066204,0.00017473,2.2204e-016,2.2204e-016,0.012847,2.2204e-016,2.2204e-016,2.2204e-016,2.2204e-016,2.2204e-016,2.2204e-016,7.4076e-005,2.2204e-016,2.2204e-016,2.2204e-016,2.2204e-016,0.0048005,0.0031499,2.2204e-016,2.2204e-016,2.2204e-016,2.2204e-016,0.038588,2.2204e-016,2.2204e-016,2.2204e-016,2.2204e-016,2.2204e-016,0.0091653,2.2204e-016,2.2204e-016,0.0056399,0.0029274,2.2204e-016,2.2204e-016,0.0018306,2.2204e-016,0.00017228,2.2204e-016,0.0083356,0.0059593,0.002827,2.2204e-016,2.2204e-016,2.2204e-016,2.2204e-016,2.2204e-016,2.2204e-016,0.0061041,2.2204e-016,2.2204e-016,0.019809,0.03622,9.3346e-005,0.0017843,0.0025289,2.2204e-016,2.2204e-016,0.0003574,0.0043425,2.2204e-016,2.2204e-016,2.2204e-016,2.2204e-016,0.0029597,2.2204e-016,2.2204e-016,2.2204e-016,0.022541,0.064638,2.2204e-016,2.2204e-016,2.2204e-016,2.2204e-016,2.2204e-016,0.063066,2.2204e-016,0.010967,0.053742,2.2204e-016,0.0049675,0.0031125,0.0040832,0.0011104,2.2204e-016,2.2204e-016,0.0012051,2.2204e-016,2.2204e-016,2.2204e-016,2.2204e-016,0.0070013,0.0001927,2.2204e-016,0.0062557,2.2204e-016,0.00035953,0.12871,0.013784,0.017614,2.2204e-016,2.2204e-016,0.014627,2.2204e-016,2.2204e-016,0.014233,0.032089,0.0025512,0.030301,0.0012709,2.2204e-016,2.2204e-016,0.000967,0.0055692,2.2204e-016,0.0034603,0.00092651,0.0083948,0.0040807,2.2204e-016,2.2204e-016,2.2204e-016,0.0010841,0.0065919,0.0029231,2.2204e-016,2.2204e-016,0.064709,0.0119,2.2204e-016,2.2204e-016,2.2204e-016,2.2204e-016,0.022295,0.056038,2.2204e-016,2.2204e-016,2.2204e-016,0.029987,0.01716,0.013,2.2204e-016,0.0087363,0.0084331,0.0081118,0.0022282,0.0024898,0.0054299,0.00635,2.2204e-016,2.2204e-016,0.0028548,0.0013943,0.010778,0.0013615,0.0045581,2.2204e-016,2.2204e-016,2.2204e-016,2.2204e-016,2.2204e-016,0.044885,0.0091959,2.2204e-016,2.2204e-016,0.020531,0.024089,0.005094,0.021558,2.2204e-016,0.027775,2.2204e-016,0.016344,0.055712,2.2204e-016,0.0026298,0.00052897,2.2204e-016,2.2204e-016,2.2204e-016,0.0027381,0.010185,0.00014101,2.2204e-016,0.0013329,0.0025451,0.0019133,0.0054114,0.0038581,0.010923,0.00885

25, 2.2204e-016, 0.0055012, 0.0060672, 0.040679, 2.2204e-016, 0.035173, 0.093466, 0.086574, 0.00089131, 0.037413, 2.2204e-016, 2.2204e-016, 0.00035764, 0.024999, 2.2204e-016, 0.02549, 0.014988, 2.2204e-016, 0.026361, 2.2204e-016, 2.2204e-016, 0.0056202, 2.2204e-016, 2.2204e-016, 2.2204e-016, 2.2204e-016, 2.2204e-016, 0.0042723, 0.0018911, 0.001417, 2.2204e-016, 2.2204e-016, 2.2204e-016, 0.014812, 2.2204e-016, 2.2204e-016, 2.2204e-016, 2.2204e-016, 0.053561, 0.0088361, 2.2204e-016, 2.2204e-016, 0.093473, 2.2204e-016, 2.2204e-016, 2.2204e-016, 0.0054894, 0.060933, 2.2204e-016, 0.034508, 0.011073, 2.2204e-016, 0.032675, 2.2204e-016, 2.2204e-016, 0.0039538, 2.2204e-016, 2.2204e-016, 2.2204e-016, 2.2204e-016, 2.2204e-016, 2.2204e-016, 0.0057225, 2.2204e-016, 2.2204e-016, 0.0048681, 2.2204e-016, 0.0012572, 0.00036195, 0.0091744, 2.2204e-016, 2.2204e-016, 2.2204e-016, 2.2204e-016, 0.04134, 0.027898, 2.2204e-016, 2.2204e-016, 2.2204e-016, 2.2204e-016, 0.022311, 2.2204e-016, 0.011492, 2.2204e-016, 2.2204e-016, 0.023228, 0.0067259, 0.0083871, 0.0020116, 2.2204e-016, 2.2204e-016, 0.0079844, 0.042418, 0.00066951, 2.2204e-016, 0.00062487, 2.2204e-016, 0.0011582, 2.2204e-016, 2.2204e-016, 0.00658, 2.2204e-016, 2.2204e-016, 0.0060524, 2.2204e-016, 2.2204e-016, 0.0076588, 2.2204e-016, 2.2204e-016, 0.0036794, 0.0047894, 0.033117, 2.2204e-016, 2.2204e-016, 2.2204e-016, 0.066159, 0.040513, 2.2204e-016, 0.025094, 2.2204e-016, 2.2204e-016, 2.2204e-016, 2.2204e-016, 2.2204e-016, 0.032516, 2.2204e-016, 0.038267, 0.018412, 0.030093, 0.011116, 0.0017761, 2.2204e-016, 0.00091309, 0.0085591, 2.2204e-016, 2.2204e-016, 0.011375, 0.00043833, 2.2204e-016, 2.2204e-016, 0.00081712, 0.0027279, 2.2204e-016, 0.0035612, 2.2204e-016, 0.00072276, 2.2204e-016, 2.2204e-016, 0.053581, 0.063144, 0.0052366, 2.2204e-016, 0.0053287, 0.083668, 2.2204e-016, 2.2204e-016, 0.038917, 0.017044, 2.2204e-016, 2.2204e-016, 2.2204e-016, 0.022677, 0.014096, 2.2204e-016, 2.2204e-016, 0.0052696, 0.023494, 2.2204e-016, 2.2204e-016, 2.2204e-016, 0.0045115, 2.2204e-016, 2.2204e-016, 2.2204e-016, 0.0012848, 0.0038078, 0.0015428, 2.2204e-016, 2.2204e-016, 0.0021377, 2.2204e-016, 0.0039975, 2.2204e-016, 0.0039636, 0.0016592, 0.0032354, 2.2204e-016, 2.2204e-016, 2.2204e-016, 0.045144, 0.009118, 0.056926, 2.2204e-016, 0.055029, 2.2204e-016, 0.0070516, 0.016428, 0.031394, 2.2204e-016, 0.00051216, 2.2204e-016, 2.2204e-016, 2.2204e-016, 2.2204e-016, 2.2204e-016, 0.022865, 2.2204e-016, 0.0035998, 2.2204e-016, 0.0020383, 2.2204e-016, 0.0032699, 2.2204e-016, 0.0086448, 0.0072671, 2.2204e-016, 2.2204e-016, 2.2204e-016, 0.0038694, 0.0084239, 0.0035202, 2.2204e-016, 2.2204e-016, 2.2204e-016, 0.012326, 2.2204e-016, 2.2204e-016, 2.2204e-016, 2.2204e-016, 0.0042311, 2.2204e-016, 2.2204e-016, 0.12343, 0.020703, 0.0063286, 2.2204e-016, 0.012865, 2.2204e-016, 0.017023, 2.2204e-016, 0.012323, 0.013945, 0.0049736, 2.2204e-016, 0.0014433, 0.0061001, 0.0079065, 2.2204e-016, 2.2204e-016, 2.2204e-016, 0.0033007, 0.0045708, 2.2204e-016, 0.00090837, 0.0059775, 0.0024464, 0.0013804, 0.0062184, 0.010706, 2.2204e-016, 0.0032679, 2.2204e-016, 0.047387, 2.2204e-016, 0.080658, 2.2204e-016, 0.17918, 0.068664, 2.2204e-016, 2.2204e-016, 0.061653, 0.0027848, 2.2204e-016, 2.2204e-016, 2.2204e-016, 2.2204e-016

016,2.2204e-016,2.2204e-016,2.2204e-016,2.2204e-016,0.048255,2.2204e-016,0.0018287,0.0020406,0.0008532,2.2204e-016,0.0051834,2.2204e-016,0.0019588,2.2204e-016,2.2204e-016,2.2204e-016,2.2204e-016,2.2204e-016,2.2204e-016,2.2204e-016,0.0072374,2.2204e-016,0.0151,0.0018351,0.01466,2.2204e-016,0.053116,2.2204e-016,0.0067763,0.0036409,0.00044313,0.011416,2.2204e-016,2.2204e-016,2.2204e-016,2.2204e-016,2.2204e-016,0.044472,2.2204e-016,0.017127,2.2204e-016,0.013023,2.2204e-016,2.2204e-016,2.2204e-016,0.0051903,0.0077643,2.2204e-016,2.2204e-016,0.0044511,2.2204e-016,2.2204e-016,0.0037929,2.2204e-016,0.0014878,0.0026315,2.2204e-016,0.0030077,2.2204e-016,0.005705,0.0033283,2.2204e-016,2.2204e-016,0.076346,0.048717,0.11567,0.0054923,2.2204e-016,0.015601,2.2204e-016,2.2204e-016,2.2204e-016,0.053351,0.0030073,2.2204e-016,2.2204e-016,0.0034767,2.2204e-016,0.015652,2.2204e-016,2.2204e-016,2.2204e-016,0.0027029,2.2204e-016,2.2204e-016,2.2204e-016,2.2204e-016,2.2204e-016,2.2204e-016,2.2204e-016,0.0088728,2.2204e-016,2.2204e-016,2.2204e-016,0.0047741,0.0038014,0.0018153,0.0099815,2.2204e-016,2.2204e-016,2.2204e-016,0.010183,0.0079972,0.059805,2.2204e-016,0.0039304,0.015311,0.023932,0.064589,0.033039,0.050619,2.2204e-016,0.028746,0.033308,0.015729,0.01435,2.2204e-016,2.2204e-016,2.2204e-016,2.2204e-016,2.2204e-016,0.0077029,2.2204e-016,0.0042691,2.2204e-016,0.0011984,2.2204e-016,0.0075133,0.0026887,0.020666,2.2204e-016,0.00050512,0.009069,0.0087755,0.008121,0.0049001,2.2204e-016,0.0050091,0.0081091,2.2204e-016,2.2204e-016,0.024629,0.037129,2.2204e-016,2.2204e-016,0.043003,2.2204e-016,0.060503,2.2204e-016,0.031849,2.2204e-016,0.0044012,0.0020221,2.2204e-016,0.021445,2.2204e-016,0.010972,2.2204e-016,0.018646,2.2204e-016,0.0069697,0.0053531,0.0024631,0.0021124,0.0076271,0.0025416,2.2204e-016,2.2204e-016,2.2204e-016,0.0062818,2.2204e-016,2.2204e-016,0.0042814,0.0017202,0.0024007,0.0036262,0.00051941,2.2204e-016,2.2204e-016,0.029534,2.2204e-016,0.024763,0.021499,0.037013,2.2204e-016,0.041429,2.2204e-016,0.023086,2.2204e-016,2.2204e-016,0.043493,2.2204e-016,0.0016939,2.2204e-016,2.2204e-016,2.2204e-016,2.2204e-016,2.2204e-016,2.2204e-016,2.2204e-016,2.2204e-016,2.2204e-016,0.003613,0.0016163,0.0014905,2.2204e-016,0.0048668,2.2204e-016,2.2204e-016,0.010843,8.8353e-005,2.2204e-016,2.2204e-016,2.2204e-016,2.2204e-016,2.2204e-016,2.2204e-016,2.2204e-016,0.0014546,0.0084644,2.2204e-016,2.2204e-016,2.2204e-016,0.0062137,2.2204e-016,0.036135,0.017157,2.2204e-016,7.7749e-006,0.013879,0.0028972,2.2204e-016,0.0081885,0.002477,2.2204e-016,0.0025248,0.0038682,2.2204e-016,2.2204e-016,0.009371,0.0027689,0.0024798,2.2204e-016,0.012068,0.0081482,0.00093867,2.2204e-016,2.2204e-016,0.0037345,2.2204e-016,2.2204e-016,0.0061193,0.032983,0.038656,0.0050599,0.0015702,0.0091095,0.0070637,0.013209,0.026019,2.2204e-016,2.2204e-016,2.2204e-016,2.2204e-016,2.2204e-016,0.024887,2.2204e-016,2.2204e-016,0.017359,2.2204e-016,2.2204e-016,0.006768,0.0058793,0.0028243,0.0060436,2.2204e-016,2.2204e-016,2.2204e-016,0.0018328,2.2204e-016,2.2204e-016,2.2204e-016,2.2204e-016

016,0.0035138,0.0038313,0.0046357,0.0082295,2.2204e-016,2.2204e-  
016,0.045162,2.2204e-016,2.2204e-016,0.021519,2.2204e-016,2.2204e-  
016,2.2204e-016,0.097076,2.2204e-016,0.002341,2.2204e-016,2.2204e-  
016,0.036555,2.2204e-016,2.2204e-016,0.0015874,2.2204e-016,2.2204e-  
016,0.0031712,0.0030536,0.011329,2.2204e-016,2.2204e-  
016,0.0030241,2.2204e-016,2.2204e-016,0.0014224,2.2204e-016,2.2204e-  
016,0.012728,0.00038344,2.2204e-016,6.5112e-  
005,0.0044045,0.0029157,0.0023029,2.2204e-016,2.2204e-016,2.2204e-  
016,0.017209,0.0625,2.2204e-016,2.2204e-016,2.2204e-  
016,0.041872,2.2204e-016,0.037754,2.2204e-016,0.0039871,2.2204e-  
016,0.0025666,2.2204e-016,0.0010317,2.2204e-016,2.2204e-  
016,0.012935,0.0040968,2.2204e-016,2.2204e-016,0.00020133,2.2204e-  
016,2.2204e-016,2.2204e-016,0.00084536,0.0097112,2.2204e-016,2.2204e-  
016,2.2204e-016,0.013519,2.2204e-016,0.0041876,0.00090246,2.2204e-  
016,0.013066,2.2204e-016,0.024746,0.023711,2.2204e-016,2.2204e-  
016,2.2204e-016,2.2204e-  
016,0.021951,0.00097581,0.0073783,0.0012894,0.0055043,2.2204e-  
016,2.2204e-016,2.2204e-016,0.0021037,0.0045579,0.0069129,2.2204e-  
016,0.00114,2.2204e-016,0.0083622,0.00052441,2.2204e-  
016,0.0016691,2.2204e-016,2.2204e-  
016,0.0054561,0.0061972,0.0021001,0.0052735,0.005118,0.00909,2.2204e-  
016,2.2204e-016,0.0027992,0.0042772,2.2204e-016,0.034404,2.2204e-  
016,0.0017376,0.031538,2.2204e-016,2.2204e-016,0.0033293,2.2204e-  
016,2.2204e-016,0.0045764,2.2204e-016,0.0024094,2.2204e-016,2.2204e-  
016,2.2204e-016,2.2204e-016,0.0057156,0.0094432,0.0014135,2.2204e-  
016,2.2204e-016,2.2204e-016,0.0011865,0.0021031,2.2204e-  
016,0.00027124,2.2204e-016,0.0053491,0.012303,2.2204e-016,2.2204e-  
016,0.01364,2.2204e-016,2.2204e-016,2.2204e-016,2.2204e-016,2.2204e-  
016,2.2204e-016,0.016823,0.0065477,0.0032918,2.2204e-016,2.2204e-  
016,2.2204e-016,0.0020883,2.2204e-016,2.2204e-016,2.2204e-  
016,0.002984,0.0024483,6.7963e-005,0.007524,2.2204e-016,3.9734e-  
005,0.016343,0.0024276,0.004389,0.0030029,0.00028613,0.0014725,2.2204e-  
-016,2.2204e-016,2.2204e-016,2.2204e-016,0.0071444,2.2204e-  
016,0.0032283,0.0028901,0.0031131,2.2204e-016,0.00839,2.2204e-  
016,2.2204e-016,0.0055174,0.0062967,2.2204e-016,2.2204e-  
016,0.0011603,0.0099963,2.2204e-016,2.2204e-016,2.2204e-  
016,0.0019911,2.2204e-016,2.2204e-  
016,0.0022153,0.0011992,0.00048573,0.003766,2.2204e-  
016,0.002802,2.2204e-016,2.2204e-016,2.2204e-  
016,0.0027536,0.0021715,2.2204e-016,2.2204e-  
016,0.0029206,0.0018042,0.0082631,0.0042399,2.2204e-  
016,0.0052417,0.0068635,0.00090516,0.0063451,0.0012886,2.2204e-  
016,0.0011023,0.00034447,2.2204e-016,2.2204e-016,0.0050238,2.2204e-  
016,0.0081643,2.2204e-016,2.2204e-016,2.2204e-  
016,0.0099433,0.0027142,2.2204e-016,2.2204e-016,2.2204e-  
016,0.0054858,2.2204e-016,0.0019694,2.2204e-016,2.2204e-  
016,0.0044971,2.2204e-016,2.2204e-016,2.2204e-016,2.2204e-  
016,0.0076362,2.2204e-016,2.2204e-016,2.2204e-016,0.0040856,2.2204e-  
016,0.0063888,2.2204e-016,0.0021816,0.001868,0.008007,2.2204e-  
016,2.2204e-016,0.0050784,2.2204e-016,0.0004798,0.0047581,2.2204e-  
016,2.2204e-016,0.0024575,0.0045642,2.2204e-016,2.2204e-  
016,0.009339,2.2204e-016,0.0044824,2.2204e-



016,0.0028879,0.00070899,0.0021566,2.2204e-  
016,0.0024673,0.010706,2.2204e-016,0.003393,0.0010404,2.2204e-  
016,2.2204e-016,2.2204e-016,2.2204e-016,0.0007042,2.2204e-  
016,0.0012609,2.2204e-016,2.2204e-016,2.2204e-016,2.2204e-  
016,0.0016257,2.2204e-016,2.2204e-016,0.0011951,2.2204e-016,2.2204e-  
016,0.0013563,0.0042788,0.0045672,2.2204e-016,2.2204e-016,2.2204e-  
016,2.2204e-016,2.2204e-016,0.0044461,2.2204e-  
016,0.0072766,0.0060434,0.004161,2.2204e-  
016,0.016632,0.0040503,2.2204e-016,2.2204e-016,2.2204e-  
016,0.0068252,0.0066281,2.2204e-016,2.2204e-  
016,0.0011539,0.0085837,0.0083677,2.2204e-016,0.0021201,2.2204e-  
016,2.2204e-016,2.2204e-016,0.0089387,0.0075247,2.2204e-016,2.2204e-  
016,2.2204e-016,2.2204e-016,2.2204e-  
016,0.0014718,0.0024809,0.0061528,0.00089319,2.2204e-  
016,0.0014362,2.2204e-016,2.2204e-016,0.0085439,2.2204e-  
016,0.0017433,2.2204e-016,2.2204e-016,0.0091543,0.0047669,2.2204e-  
016,2.2204e-016,0.005711,0.0014066,2.2204e-  
016,0.0022366,0.002004,2.2204e-016,0.0045148,0.0055542,2.2204e-  
016,2.2204e-016,0.0035587,0.0076008,2.2204e-  
016,0.0043902,0.00025602,0.0055244,2.2204e-  
016,0.0016398,0.002096,0.00018857,2.2204e-016,2.2204e-016,2.2204e-  
016,0.00223,2.2204e-016,2.2204e-016,2.2204e-016,2.2204e-  
016,0.0005343,0.0057738,0.0035241,2.2204e-016,0.0071085,2.2204e-  
016,2.2204e-016,2.2204e-016,2.2204e-016,2.2204e-  
016,0.0030255,0.0066191,0.0036552,0.0021036,0.00077199,2.2204e-  
016,2.2204e-016,0.0044031,0.0053177,2.2204e-016,0.014915,6.2832e-  
006,2.2204e-016,2.2204e-016,0.0058157,2.2204e-016,2.2204e-016,2.2204e-  
016,0.0036536,0.0071687,2.2204e-016,2.2204e-016,2.2204e-016,2.2204e-  
016,2.2204e-016,2.2204e-016,2.2204e-016,0.0042189,2.2204e-  
016,0.0050406,2.2204e-016,2.2204e-016,0.0082348,2.2204e-  
016,0.0019622,2.2204e-016,0.0023213,2.2204e-016,2.2204e-016,2.2204e-  
016,0.0018981,2.2204e-016,2.2204e-016,2.2204e-016,2.2204e-  
016,0.0074838,0.004641,0.0038208,0.0027993,0.0055504,2.2204e-  
016,2.2204e-016,0.00050908,0.011063,2.2204e-016,2.2204e-  
016,0.0041418,2.2204e-016,0.012959,0.0085577,2.2204e-  
016,0.0026213,0.0047878,2.2204e-016,2.2204e-016,2.2204e-016,2.2204e-  
016,0.012632,0.0040341,2.2204e-016,0.0059356,0.0032947,2.2204e-  
016,2.2204e-016,2.2204e-016,0.0074304,2.2204e-016,0.0062014,2.2204e-  
016,0.016964,0.008443,2.2204e-016,0.00010251,0.0051525,2.2204e-  
016,2.2204e-016,0.0047883,2.2204e-016,0.001307,2.2204e-016,2.2204e-  
016,2.2204e-016,0.0034425,2.2204e-016,0.010813,2.2204e-016,2.2204e-  
016,2.2204e-016,0.002153,0.0091371,2.2204e-016  
0.12025,0.1243,0.12093,0.1219,0.1183,0.11339,0.11198,0.12236,0.12201,0  
.11157,0.13024,0.12337,0.12737,0.12269,0.11283,0.1159,0.12462,0.11924,  
0.11709,0.11371,1.3299,1.2437,1.5864,1.2131,0.11607,0.109,0.11419,0.11  
632,0.11406,0.12025,0.11576,0.11931,0.11804,0.11994,0.12236,0.11363,0.  
11508,0.1223,0.11485,2.4319,1.2424,1.1755,0.97242,1.2506,1.2483,1.0207  
,0.11475,0.11859,0.12123,0.12183,0.11893,0.11046,0.11781,0.11332,0.119  
12,0.11496,0.13066,0.1254,0.12085,0.11728,0.11682,2.3101,2.3161,1.2013  
,1.1256,1.2016,1.2651,1.2369,1.2034,1.2781,1.216,0.11398,0.1196,0.1199  
5,0.11396,0.11677,0.12069,0.12309,0.12227,0.11301,0.11966,0.11318,0.12  
148,0.11585,0.11927,0.11547,2.4004,2.4222,2.3639,1.3071,1.3482,1.2038,

1.1166,1.2105,1.3036,1.1271,0.88935,1.2263,0.11902,0.12169,0.12304,0.1  
2207,0.12036,0.11381,0.11852,0.12019,0.11574,0.11447,0.11757,0.11204,0  
.12962,0.11747,0.11979,0.12784,2.3462,2.3521,2.4731,2.3935,1.2929,1.14  
13,1.3974,1.0999,1.248,1.2532,1.4176,1.2956,1.2503,1.2858,0.12312,0.10  
769,0.11894,0.12099,0.12777,0.11708,0.12364,0.11834,0.12641,0.12421,0.  
11191,0.11727,0.11742,0.11961,0.12508,0.12167,2.2794,2.3172,2.4409,2.3  
809,2.3502,2.3372,1.0577,1.3333,1.2954,1.3041,1.2825,1.2843,0.99069,1.  
0488,1.4059,1.2593,0.11323,0.12881,0.12623,0.12614,0.11873,0.11983,0.1  
2079,0.12691,0.11603,0.11711,0.1191,0.12044,0.13358,0.12102,0.1236,0.1  
1327,0.11475,2.3701,2.3729,2.3623,2.4264,2.3993,2.3065,1.1789,1.2986,1  
.3195,1.2473,1.3945,1.2251,1.2605,1.2575,1.2789,1.424,1.3101,0.12029,0  
.11996,0.11779,0.11536,0.11935,0.11733,0.12678,0.12115,0.12135,0.11865  
,0.12451,0.122,0.12179,0.15952,0.16482,0.16332,0.11981,2.3945,2.3765,2  
.4282,2.3685,2.4423,2.5066,2.4732,1.2583,1.6205,1.1134,1.7713,1.2546,1  
.3228,1.218,1.2977,1.2834,1.2155,0.98274,0.11878,0.11065,0.1255,0.1213  
,0.1184,0.12088,0.11674,0.11125,0.12508,0.12354,0.12156,0.15,0.15191,0  
.15186,0.16697,0.15105,0.14682,0.1187,2.2804,2.4391,2.4014,2.3668,2.38  
38,2.4825,2.3263,1.2211,1.1803,1.3007,1.4139,1.0605,1.3026,1.1342,1.29  
78,1.2916,1.2086,1.2126,0.12371,0.11165,0.12176,0.1178,0.12007,0.11261  
,0.11787,0.1229,0.11521,0.15674,0.1622,0.15362,0.15909,0.15432,0.16617  
,0.15854,0.14314,0.14611,0.11554,2.4172,2.3839,2.3079,2.3344,2.3367,2.  
3214,2.4146,1.3796,1.2424,1.1799,1.0673,1.1917,1.2067,1.085,1.3187,1.2  
119,1.245,1.0963,1.3446,0.12269,0.11365,0.12037,0.11449,0.12225,0.1147  
3,0.15366,0.16641,0.14344,0.15598,0.16519,0.1551,0.14992,0.15848,0.145  
45,0.15942,0.15336,0.15749,2.4306,2.2912,2.3571,2.3155,2.4452,2.4452,2  
.3735,1.2769,1.2663,1.2887,1.1872,1.2995,0.96572,1.4159,1.1694,1.4087,  
1.2537,1.2559,1.3219,0.1234,0.11651,0.1224,0.16312,0.15381,0.16161,0.1  
665,0.15539,0.1561,0.1528,0.15899,0.15886,0.14882,0.16277,0.15281,0.15  
059,0.14145,0.15572,2.4409,2.4066,2.4164,2.3087,2.3955,2.5094,2.3466,2  
.3325,2.4194,1.0879,1.294,1.5209,1.2549,1.0428,1.2863,1.2507,1.2257,1.  
2508,1.2092,1.2526,0.14377,0.15202,0.16526,0.14825,0.14627,0.15075,0.1  
5079,0.15108,0.15607,0.15241,0.14445,0.15929,0.15268,0.15974,0.15133,0  
.16019,0.14908,0.16804,2.3678,2.3248,2.3804,2.4608,2.3293,2.4696,2.350  
9,2.4251,2.4032,1.2604,1.2624,0.95289,0.8868,1.0008,0.88228,0.83036,0.  
87732,0.90541,0.89085,0.95147,0.15102,0.15893,0.15701,0.15369,0.14955,  
0.16976,0.15069,0.1571,0.15543,0.15216,0.14731,0.14853,0.16253,0.16154  
,0.16328,0.15363,0.14166,0.15352,2.4432,2.3287,2.3536,2.3438,2.3837,2.  
3901,2.3196,2.3407,2.4939,1.312,0.89263,0.69437,0.84246,0.52877,0.9333  
7,0.91396,1.0113,0.87663,0.9431,0.80251,0.16148,0.15942,0.16057,0.1613  
1,0.1501,0.1573,0.15405,0.16322,0.1539,0.1578,0.16601,0.15566,0.15252,  
0.16754,0.16376,0.15665,0.16164,0.15768,2.4358,2.368,2.4506,2.3523,2.5  
333,2.4488,2.3728,1.3426,1.3636,1.0893,0.98386,0.64866,0.93361,0.76654  
,0.80153,0.8638,0.89064,0.98554,1.0336,0.86107,0.16044,0.15546,0.16023  
,0.14496,0.15966,0.14825,0.16036,0.15262,0.14851,0.15891,0.16391,0.152  
74,0.14484,0.15593,0.16018,0.15192,0.17022,0.16351,2.4009,2.3702,2.418  
4,2.3343,2.3764,2.3894,1.2934,1.2939,1.238,1.1804,1.195,1.165,0.84187,  
0.87311,0.90008,1.0091,0.96712,0.88511,0.97426,0.88353,0.15668,0.15597  
,0.14943,0.14878,0.16027,0.15641,0.15539,0.15602,0.14909,0.14713,0.159  
83,0.1478,0.15775,0.15216,0.17196,0.16591,0.15656,0.14992,2.4514,2.436  
3,2.4473,2.3887,2.3434,1.2863,1.2503,1.1655,1.2801,1.3282,1.3055,0.897  
69,0.8228,0.92308,0.81483,0.91652,0.88124,0.65798,0.74995,0.84869,0.14  
329,0.15612,0.15063,0.15029,0.16219,0.14023,0.16364,0.15444,0.15282,0.

14682,0.15862,0.16527,0.15977,0.16322,0.16148,0.14487,0.15705,0.16177,  
2.4051,2.4195,2.3572,1.284,1.5457,1.3092,1.3485,1.3282,1.593,1.1164,1.  
2034,0.97992,0.86804,0.65633,0.89561,0.89847,0.8939,0.96799,0.8706,0.9  
8566,0.15407,0.15782,0.14693,0.16068,0.15179,0.15094,0.15694,0.17724,0  
.15086,0.1541,0.17034,0.16076,0.16182,0.16096,0.17001,0.1603,0.16377,0  
.1413,2.3454,1.3148,1.6493,1.2914,1.4184,1.2164,1.3233,1.3462,1.2589,1  
.2063,0.98524,0.5909,0.88137,0.88745,0.76685,0.87222,0.60376,0.99975,0  
.9083,0.15606,0.16767,0.14961,0.15909,0.15147,0.17289,0.16101,0.15195,  
0.15581,0.14821,0.16174,0.149,0.15089,0.16194,0.16343,0.15329,0.15765,  
0.19023,1.4581,1.165,1.5197,1.1848,1.3432,1.307,1.4294,1.2117,1.3358,1  
.4106,0.88811,0.92429,0.81289,0.97459,0.48857,0.72084,0.88503,0.84172,  
0.86887,0.15433,0.15205,0.15789,0.15131,0.15632,0.14207,0.15223,0.1570  
5,0.15849,0.1572,0.15751,0.14418,0.15275,0.14987,0.14219,0.16294,0.155  
58,0.1813,1.1384,1.2267,1.2521,1.2836,1.3501,1.3594,1.6358,1.0631,1.36  
73,1.2988,0.9319,0.92045,0.88607,0.86066,1.0023,0.98627,0.82431,0.7686  
8,0.15606,0.15999,0.16217,0.153,0.14678,0.15649,0.15812,0.1523,0.1434,  
0.17181,0.15514,0.1597,0.14806,0.15527,0.1635,0.16109,0.14299,0.15087,  
0.19879,1.2536,1.3081,1.215,1.3149,1.3266,1.5037,0.94859,1.1431,1.2016  
,1.2829,0.90527,0.939,0.98048,0.83563,0.8749,0.95572,0.89919,0.81657,0  
.15231,0.17157,0.14984,0.15491,0.16514,0.16549,0.1631,0.16378,0.1498,0  
.14682,0.14824,0.14827,0.15606,0.1527,0.14998,0.16282,0.15574,0.19743,  
0.19686,0.18568,1.2534,1.4614,1.0183,1.2942,1.2766,1.2834,1.281,1.2737  
,1.3859,0.71452,0.93201,0.90129,0.92317,0.93106,0.89233,0.15465,0.1549  
,0.15373,0.14481,0.16284,0.1578,0.16323,0.1563,0.14766,0.15174,0.15672  
,0.15402,0.15227,0.1522,0.15278,0.16872,0.16068,0.14593,0.18747,0.1967  
5,0.19544,0.19446,1.2687,1.3609,1.1929,1.1387,1.3937,1.4553,1.1127,1.3  
619,1.3241,0.94306,0.94373,0.86067,0.15326,0.15333,0.15595,0.15348,0.1  
5496,0.16111,0.15458,0.17023,0.1584,0.15519,0.15385,0.16177,0.15333,0.  
14092,0.15333,0.15663,0.16207,0.15225,0.14216,0.14281,0.20232,0.1857,0  
.19752,0.19094,0.18393,0.20162,1.3339,1.3557,1.4182,1.3925,1.2153,1.15  
66,1.2879,1.5705,0.15309,0.16007,0.15715,0.16095,0.15309,0.14434,0.151  
73,0.15053,0.16944,0.16736,0.15625,0.15425,0.15095,0.15903,0.15424,0.1  
5286,0.15413,0.14881,0.14554,0.15829,0.16324,0.15464,0.15439,0.19449,0  
.20167,0.1878,0.18155,0.19499,0.19205,1.2185,1.2726,1.1305,1.2899,1.34  
93,0.18456,0.19335,0.15194,0.14252,0.14675,0.1567,0.15615,0.15325,0.15  
61,0.15486,0.14873,0.14801,0.15348,0.16315,0.1655,0.14973,0.14465,0.14  
873,0.15914,0.15772,0.15188,0.14325,0.14439,0.19971,0.20318,0.19187,0.  
19305,0.20066,0.18249,0.18116,0.18567,0.18952,0.18469,1.2776,1.3629,0.  
19983,0.19758,0.18596,0.18878,0.15342,0.16057,0.1591,0.15675,0.16715,0  
.15827,0.15282,0.16484,0.16643,0.15184,0.16065,0.16833,0.15543,0.16114  
,0.15139,0.14203,0.15706,0.15437,0.14957,0.19034,0.18584,0.19318,0.186  
15,0.19566,0.1941,0.19052,0.18832,0.19974,0.19399,0.18865,0.19668,0.19  
561,0.18882,0.18848,0.18967,0.20166,0.15542,0.15096,0.15298,0.15273,0.  
15488,0.1539,0.15376,0.15448,0.1498,0.15769,0.15855,0.15724,0.13677,0.  
14503,0.15055,0.1619,0.1949,0.18333,0.18756,0.195,0.1898,0.19628,0.192  
16,0.18373,0.20193,0.19857,0.19176,0.19642,0.1951,0.19032,0.19036,0.19  
301,0.17889,0.18123,0.19527,0.15247,0.16362,0.14426,0.1536,0.14543,0.1  
6352,0.1558,0.15402,0.15418,0.15547,0.15739,0.1487,0.15878,0.18359,0.1  
8124,0.19148,0.17898,0.1854,0.18177,0.18708,0.19911,0.18571,0.1814,0.1  
813,0.19313,0.18847,0.19789,0.1847,0.19118,0.19237,0.20003,0.18749,0.1  
8096,0.19739,0.1488,0.15212,0.15952,0.14993,0.15791,0.15679,0.15832,0.  
15677,0.14669,0.19606,0.18536,0.19443,0.18091,0.19746,0.19096,0.19493,

0.19279,0.199,0.20258,0.18224,0.19566,0.19079,0.18976,0.18851,0.18681,  
0.18465,0.19378,0.19267,0.19166,0.17548,0.19237,0.18913,0.18854,0.1928  
3,0.15781,0.15262,0.15238,0.14687,0.18872,0.19346,0.19375,0.19265,0.17  
719,0.18876,0.17217,0.18708,0.18472,0.19208,0.19124,0.19946,0.19084,0.  
1964,0.17794,0.20739,0.19794,0.1885,0.18316,0.18882,0.19825,0.19961,0.  
18807,0.1828,0.19388,0.20043,0.19586,0.18679,0.19241,0.1853,0.18701,0.  
19208,0.19971,0.19894,0.18301,0.18836,0.18028,0.18435,0.18146,0.19715,  
0.1914,0.19227,0.19456,0.1862,0.19282,0.18547,0.18767,0.19843,0.18605,  
0.18789,0.18959,0.19201,0.20193,0.19529,0.18978,0.17856,0.20054,0.1919  
4,0.18679,0.19293,0.19462,0.17954,0.19004,0.19875,0.18618,0.17891,0.19  
545,0.19831,0.18942,0.19323,0.1917,0.19418,0.17957,0.19348,0.19433,0.1  
9264,0.18904,0.18702,0.18885,0.19554,0.18424,0.18516,0.19132,0.18357,0  
.19355,0.19658,0.1963,0.18346,0.19789,0.18953,0.18414,0.18612,0.18576,  
0.18669,0.19536,0.19196,0.19069,0.19742,0.19048,0.17122,0.1866,0.19202  
,0.19883,0.18118,0.205,0.18906,0.18599,0.18217,0.19991,0.18682,0.18785  
,0.18838,0.19651,0.20069,0.18255,0.18819,0.18082,0.18821,0.18062,0.185  
75,0.18817,0.19694,0.18819,0.1984,0.18669,0.18491,0.19643,0.18796,0.19  
107,0.18838,0.19308,0.18686,0.18675,0.18247,0.19235,0.18604,0.18566,0.  
1858,0.18441,0.20395,0.19667,0.19543,0.19806,0.19194,0.18647,0.18633,0  
.19017,0.19721,0.18463,0.19113,0.1945,0.19021,0.20414,0.19428,0.18009,  
0.19271,0.1979,0.18435,0.18808,0.18884,0.19146,0.20446,0.19697,0.1909,  
0.1962,0.19412,0.19245,0.19337,0.18914,0.20114,0.18448,0.19451,0.19412  
,0.20693,0.19603,0.18175,0.19666,0.19952,0.18893,0.18403,0.19649,0.187  
34,0.19339,0.18772,0.18699,0.18539,0.19327,0.18852,0.19944,0.17627,0.1  
8583,0.18937,0.19223,0.19935,0.173  
0.16961,0.17401,0.17218,0.16998,0.1669,0.1643,0.16085,0.16893,0.17018,  
0.16061,0.18059,0.1716,0.17463,0.17077,0.1647,0.16175,0.16838,0.1671,0  
.16803,0.15947,0.9525,0.90623,1.086,0.88431,0.16664,0.16005,0.15983,0.  
17062,0.16649,0.16956,0.16622,0.16869,0.16354,0.16702,0.17208,0.16377,  
0.16489,0.1684,0.16235,1.5953,0.87511,0.82762,0.69172,0.88309,0.87861,  
0.7316,0.16182,0.16695,0.17292,0.17233,0.16739,0.15537,0.16501,0.16372  
,0.16879,0.16595,0.17542,0.17146,0.16873,0.16737,0.16685,1.5397,1.5578  
,0.85312,0.78684,0.85347,0.9161,0.88601,0.85026,0.90372,0.89408,0.1615  
4,0.16774,0.16763,0.16408,0.16907,0.17053,0.17385,0.16901,0.16129,0.16  
986,0.16467,0.16853,0.16292,0.16731,0.1643,1.5876,1.5899,1.6173,0.9421  
2,0.91898,0.84139,0.80259,0.85169,0.93305,0.78714,0.66808,0.912,0.1636  
4,0.17061,0.17312,0.17201,0.17104,0.16442,0.16807,0.16862,0.16718,0.16  
52,0.16532,0.15714,0.1776,0.16676,0.16895,0.17794,1.5571,1.5766,1.6781  
,1.6048,0.92262,0.81338,0.98373,0.80145,0.87605,0.90428,0.99652,0.9034  
3,0.87503,0.91613,0.17161,0.16009,0.17046,0.17209,0.17645,0.16958,0.17  
277,0.16522,0.17583,0.17573,0.15965,0.1692,0.16689,0.16748,0.17338,0.1  
6977,1.5166,1.568,1.64,1.5769,1.6041,1.5111,0.7509,0.92057,0.92014,0.9  
2556,0.90658,0.90863,0.70278,0.77356,0.99623,0.87009,0.16452,0.17531,0  
.17421,0.1745,0.16892,0.1695,0.17097,0.17718,0.16449,0.16774,0.16751,0  
.17199,0.18152,0.16643,0.16988,0.16131,0.16195,1.6032,1.555,1.5671,1.6  
438,1.6262,1.4976,0.82443,0.93994,0.91836,0.88527,0.97826,0.8507,0.882  
68,0.89589,0.91613,1.0328,0.92189,0.16856,0.16809,0.16754,0.16593,0.16  
665,0.16833,0.17529,0.17089,0.16955,0.16789,0.1761,0.17196,0.17314,0.2  
0015,0.20115,0.19931,0.16686,1.5958,1.6064,1.6685,1.5892,1.6705,1.7185  
,1.6709,0.88162,1.136,0.78425,1.1831,0.88269,0.92523,0.85232,0.92225,0  
.89669,0.8577,0.71744,0.16683,0.16024,0.17273,0.16978,0.16635,0.16909,  
0.16544,0.15834,0.17238,0.17311,0.17041,0.19103,0.18579,0.18614,0.2061

7,0.19093,0.18636,0.17003,1.5125,1.6536,1.613,1.5576,1.6464,1.7214,1.5  
371,0.86353,0.85341,0.91226,1.0016,0.76173,0.92267,0.79701,0.92626,0.9  
2003,0.85139,0.86175,0.17243,0.1613,0.16795,0.16784,0.17084,0.16306,0.  
16635,0.17179,0.16783,0.19466,0.1975,0.19328,0.19631,0.19107,0.20305,0.  
.19752,0.18233,0.18612,0.16481,1.6244,1.6126,1.508,1.5901,1.5639,1.570  
1,1.6441,0.95157,0.90646,0.83254,0.76597,0.8609,0.86025,0.77757,0.9392  
8,0.84477,0.87755,0.77306,0.95849,0.17024,0.16246,0.17111,0.16672,0.17  
372,0.1668,0.19055,0.2026,0.18419,0.19237,0.19693,0.18947,0.19136,0.19  
445,0.18367,0.19687,0.19312,0.1976,1.666,1.5224,1.5975,1.5721,1.6669,1.  
.6865,1.5807,0.89552,0.86086,0.90413,0.8342,0.91326,0.70104,1.0122,0.8  
229,0.97553,0.88507,0.90925,0.93276,0.17257,0.16869,0.17106,0.20282,0.  
19173,0.19744,0.20531,0.19047,0.19349,0.19189,0.19964,0.19922,0.18692,  
0.19955,0.19173,0.19167,0.1811,0.19564,1.675,1.6357,1.622,1.5038,1.590  
6,1.6873,1.5397,1.5704,1.6144,0.78753,0.93077,1.0359,0.87854,0.75629,0.  
.88508,0.87436,0.85673,0.89776,0.87614,0.89808,0.18135,0.18739,0.20136  
,0.18705,0.18818,0.18809,0.19021,0.19095,0.19422,0.1895,0.1836,0.19572  
,0.19137,0.1955,0.19231,0.19689,0.19245,0.20003,1.568,1.5727,1.5874,1.  
63,1.5822,1.6683,1.6227,1.6677,1.6264,0.89245,0.89609,0.70347,0.65409,  
0.73974,0.65116,0.61582,0.628,0.65713,0.64858,0.69978,0.18828,0.19982,  
0.19489,0.19403,0.18608,0.20279,0.18868,0.19549,0.19605,0.19166,0.1879  
6,0.18892,0.20043,0.19695,0.20263,0.18994,0.18202,0.19007,1.6407,1.529  
8,1.5413,1.5276,1.6149,1.6402,1.526,1.5403,1.6964,0.94464,0.65204,0.53  
342,0.63566,0.43884,0.70256,0.65233,0.73545,0.64836,0.70294,0.60594,0.  
19819,0.19724,0.19648,0.19985,0.18821,0.19769,0.19423,0.20002,0.19317,  
0.20006,0.20404,0.19248,0.18971,0.20638,0.20058,0.19245,0.2001,0.19097  
,1.6542,1.6179,1.651,1.5352,1.7079,1.6675,1.5904,0.93914,0.99851,0.792  
09,0.70522,0.50408,0.68058,0.55703,0.58969,0.61611,0.64267,0.68812,0.7  
42,0.62962,0.1981,0.19377,0.19663,0.18521,0.19873,0.18732,0.19926,0.19  
36,0.1884,0.19945,0.1984,0.19233,0.18442,0.19234,0.19808,0.19031,0.204  
46,0.20057,1.5825,1.5756,1.6194,1.4875,1.5917,1.6256,0.90865,0.91269,0.  
.8652,0.834,0.82419,0.81854,0.62663,0.64425,0.66146,0.73982,0.69931,0.  
68093,0.70078,0.65398,0.19462,0.19313,0.18538,0.18757,0.19576,0.19381,  
0.191,0.18867,0.18824,0.18688,0.19895,0.18588,0.19601,0.19335,0.20646,  
0.20354,0.1909,0.18911,1.6613,1.6568,1.6719,1.6267,1.5531,0.90496,0.87  
057,0.84411,0.88274,0.94002,0.91589,0.65707,0.62675,0.67715,0.59055,0.  
66014,0.6558,0.51663,0.5668,0.62699,0.18553,0.19067,0.18854,0.18898,0.  
19799,0.18001,0.20237,0.19286,0.18992,0.18604,0.19546,0.20241,0.20332,  
0.20016,0.20177,0.18393,0.19442,0.19744,1.6456,1.6273,1.5675,0.91806,1.  
.0853,0.93427,0.94311,0.92435,1.0951,0.77875,0.86793,0.71607,0.64056,0.  
.52168,0.64802,0.66177,0.66426,0.69504,0.64526,0.72002,0.19062,0.19604  
,0.18663,0.1984,0.1881,0.18787,0.19626,0.2118,0.18927,0.19138,0.20734,  
0.19828,0.20084,0.1992,0.20533,0.19833,0.20268,0.17905,1.6328,0.90805,  
1.1362,0.92529,0.98032,0.86879,0.90558,0.95588,0.88233,0.86645,0.71663  
,0.46233,0.66459,0.6718,0.58729,0.65846,0.48427,0.7253,0.65702,0.18885  
,0.20356,0.19155,0.19748,0.19415,0.20891,0.19657,0.19561,0.1951,0.1850  
3,0.19755,0.18669,0.18876,0.19965,0.19884,0.19196,0.19734,0.21787,1.00  
92,0.80572,1.0955,0.8305,0.94274,0.95312,1.0032,0.86411,0.95519,0.9619  
6,0.65441,0.68505,0.60849,0.72302,0.39862,0.54099,0.67555,0.62512,0.61  
557,0.19482,0.186,0.19496,0.1902,0.19463,0.17778,0.18692,0.19435,0.194  
69,0.19228,0.19724,0.18418,0.1935,0.18945,0.18282,0.20073,0.19176,0.21  
399,0.81504,0.85182,0.86594,0.90972,0.93252,0.94503,1.117,0.76517,0.96  
651,0.93902,0.67313,0.67749,0.6642,0.64101,0.71868,0.70777,0.59262,0.5

8486,0.19836,0.19517,0.19833,0.19508,0.18434,0.19393,0.19739,0.19058,0.18997,0.20761,0.19499,0.20165,0.18322,0.19604,0.20068,0.19913,0.18282,0.18888,0.22966,0.88497,0.92952,0.85955,0.92809,0.94627,1.0608,0.70379,0.82938,0.84934,0.91358,0.66963,0.66787,0.70942,0.61866,0.65695,0.7133,0.66896,0.60304,0.18525,0.20698,0.18496,0.18892,0.20358,0.19844,0.20189,0.20149,0.19247,0.18976,0.18926,0.19404,0.19431,0.19356,0.18724,0.20216,0.19418,0.22737,0.22153,0.20781,0.86665,1.037,0.70785,0.91629,0.88337,0.90999,0.91139,0.90834,0.98938,0.53647,0.67878,0.66077,0.68358,0.70953,0.65379,0.19149,0.19111,0.1896,0.18581,0.19676,0.19282,0.20175,0.1918,0.18556,0.19272,0.18935,0.1922,0.18875,0.19417,0.19342,0.20647,0.19261,0.18494,0.21732,0.22051,0.22259,0.22419,0.89221,0.93767,0.82263,0.82211,0.99105,1.023,0.7983,0.96099,0.94338,0.68372,0.6965,0.63251,0.19028,0.19177,0.19362,0.19304,0.19448,0.19413,0.19279,0.20355,0.19458,0.19139,0.18902,0.19702,0.19337,0.18382,0.19186,0.19379,0.19874,0.19184,0.17963,0.18617,0.23066,0.21146,0.22433,0.2219,0.21235,0.22591,0.92803,0.97249,0.9994,0.94286,0.85428,0.81929,0.8905,1.0906,0.19145,0.1961,0.19352,0.20015,0.19065,0.18395,0.18854,0.18705,0.20439,0.20248,0.19786,0.19341,0.18773,0.19555,0.19093,0.18887,0.19228,0.19134,0.18556,0.19553,0.19583,0.19608,0.19294,0.21862,0.22703,0.21488,0.20633,0.2283,0.21964,0.86785,0.90596,0.81243,0.8975,0.93729,0.20914,0.22048,0.19029,0.18103,0.18619,0.19493,0.19088,0.19322,0.19534,0.19372,0.1883,0.18805,0.19315,0.19975,0.19786,0.18628,0.1832,0.18716,0.19765,0.1961,0.19323,0.18464,0.18314,0.22469,0.23182,0.21894,0.22263,0.22664,0.21376,0.20864,0.21618,0.21572,0.20688,0.89794,0.95869,0.22925,0.22389,0.21396,0.21652,0.1902,0.19952,0.19488,0.19115,0.19725,0.1935,0.19306,0.19825,0.19934,0.18903,0.19451,0.20492,0.19274,0.20014,0.19333,0.18335,0.19648,0.19329,0.19221,0.22291,0.20998,0.21772,0.21353,0.21627,0.22123,0.21949,0.22055,0.22797,0.22049,0.21784,0.2199,0.22176,0.21428,0.2145,0.21367,0.22874,0.19135,0.19008,0.19057,0.1935,0.19102,0.18839,0.19644,0.18835,0.18786,0.19249,0.19721,0.19612,0.1787,0.18573,0.18904,0.19769,0.21908,0.21253,0.21905,0.22109,0.21259,0.2231,0.22112,0.21062,0.23419,0.22545,0.21788,0.22116,0.22141,0.2191,0.21941,0.22012,0.20625,0.20868,0.21965,0.18827,0.20003,0.18726,0.19527,0.18107,0.19912,0.19545,0.19249,0.19205,0.19103,0.19509,0.19127,0.19576,0.20832,0.20589,0.21423,0.20737,0.2134,0.20927,0.2146,0.22418,0.21261,0.20527,0.20983,0.22023,0.21497,0.22859,0.21495,0.21354,0.21943,0.22488,0.21596,0.21259,0.22338,0.18715,0.19396,0.19675,0.19074,0.19376,0.19539,0.19503,0.19436,0.18599,0.21927,0.21332,0.22378,0.20398,0.2264,0.21914,0.22286,0.22079,0.22671,0.22767,0.21122,0.22349,0.21873,0.21245,0.22015,0.21446,0.21271,0.21839,0.21864,0.21687,0.20147,0.22106,0.21746,0.21919,0.22247,0.19739,0.19457,0.18993,0.1886,0.21262,0.21786,0.22393,0.22077,0.20685,0.21506,0.20356,0.21204,0.21334,0.21666,0.21626,0.22877,0.2135,0.22466,0.20853,0.23345,0.22371,0.21434,0.2098,0.21309,0.22416,0.22277,0.21901,0.21159,0.21746,0.22881,0.22117,0.21548,0.22213,0.21249,0.21544,0.21906,0.22636,0.22345,0.21545,0.21426,0.20691,0.21449,0.20804,0.22821,0.22108,0.22183,0.2218,0.21393,0.21991,0.20895,0.21548,0.22137,0.21538,0.21084,0.2163,0.21656,0.22817,0.22118,0.21696,0.20818,0.22697,0.22094,0.2157,0.22549,0.22162,0.20721,0.21372,0.22724,0.21484,0.20736,0.218,0.22249,0.21489,0.21349,0.21413,0.22048,0.20338,0.21573,0.21918,0.21923,0.21549,0.21566,0.21282,0.22137,0.21133,0.2097,0.21687,0.21117,0.21772,0.22158,0.22253,0.20639,0.2219,0.20972,0.2114,0.21788,0.21311,0.2121,0.22606,0.21778,0.21618,0.22683,0.21616,0.20379,0.21633,0.21751,0.22349,0.2108

1, 0.23228, 0.21887, 0.21239, 0.21383, 0.22563, 0.21468, 0.21342, 0.21344, 0.22  
573, 0.2276, 0.20943, 0.21977, 0.20807, 0.21371, 0.20961, 0.2167, 0.21581, 0.22  
344, 0.21744, 0.22295, 0.2157, 0.21181, 0.22306, 0.2131, 0.21866, 0.21608, 0.22  
146, 0.21214, 0.21279, 0.21166, 0.22089, 0.21726, 0.21582, 0.21385, 0.2127, 0.2  
3018, 0.22602, 0.22383, 0.22158, 0.22529, 0.21682, 0.20964, 0.21627, 0.22678, 0  
.21515, 0.21885, 0.21968, 0.22358, 0.23333, 0.22099, 0.20795, 0.21839, 0.2229,  
0.20938, 0.21816, 0.20778, 0.22155, 0.23046, 0.22335, 0.21971, 0.22449, 0.2234  
1, 0.21547, 0.22369, 0.21886, 0.2327, 0.21237, 0.21934, 0.22391, 0.23266, 0.220  
99, 0.20841, 0.22363, 0.22672, 0.21258, 0.21158, 0.22001, 0.2157, 0.21889, 0.21  
606, 0.21071, 0.21212, 0.2211, 0.21258, 0.22402, 0.20522, 0.20883, 0.21872, 0.2  
1956, 0.22446, 0.20754  
0.18445, 0.18525, 0.1836, 0.18145, 0.17713, 0.17755, 0.17399, 0.18017, 0.18492  
, 0.17217, 0.18978, 0.18512, 0.18303, 0.1811, 0.1802, 0.17839, 0.18086, 0.1777,  
0.18031, 0.17211, 0.69016, 0.67546, 0.79861, 0.64345, 0.17934, 0.17036, 0.1753  
3, 0.17995, 0.17788, 0.18346, 0.17602, 0.17888, 0.17855, 0.17821, 0.18245, 0.17  
774, 0.17909, 0.18282, 0.17602, 1.1335, 0.61943, 0.61918, 0.50986, 0.64847, 0.6  
4332, 0.55245, 0.17679, 0.18103, 0.1874, 0.18362, 0.17977, 0.17122, 0.17515, 0.  
1738, 0.18048, 0.18188, 0.18704, 0.18149, 0.18202, 0.18207, 0.1798, 1.0643, 1.0  
483, 0.62921, 0.58923, 0.62059, 0.6623, 0.6548, 0.60574, 0.67932, 0.67688, 0.17  
516, 0.18157, 0.17869, 0.18044, 0.18417, 0.18165, 0.18671, 0.185, 0.17694, 0.18  
64, 0.17827, 0.18179, 0.17416, 0.17955, 0.1747, 1.1012, 1.1047, 1.1183, 0.7032,  
0.66383, 0.60137, 0.59343, 0.59722, 0.71003, 0.58204, 0.50837, 0.70033, 0.1789  
9, 0.18569, 0.18479, 0.1833, 0.18282, 0.17408, 0.17771, 0.18192, 0.18129, 0.181  
15, 0.17416, 0.17208, 0.18455, 0.17757, 0.18139, 0.19203, 1.1123, 1.0499, 1.160  
1, 1.1442, 0.69104, 0.61699, 0.71673, 0.59293, 0.64818, 0.70003, 0.72775, 0.681  
39, 0.64633, 0.67119, 0.18529, 0.1744, 0.1858, 0.18347, 0.19036, 0.1806, 0.1854  
2, 0.17513, 0.19121, 0.18493, 0.17242, 0.18095, 0.17955, 0.17834, 0.19005, 0.18  
445, 1.058, 1.0799, 1.155, 1.1044, 1.1156, 1.0203, 0.54553, 0.64872, 0.69456, 0.  
70634, 0.66518, 0.65947, 0.52514, 0.58043, 0.74227, 0.65175, 0.18036, 0.19016,  
0.1873, 0.18575, 0.18238, 0.17968, 0.18327, 0.18451, 0.1773, 0.17802, 0.18178,  
0.18182, 0.1942, 0.17627, 0.18402, 0.17348, 0.17281, 1.1237, 1.0829, 1.1326, 1.  
1731, 1.1388, 1.0348, 0.62469, 0.71792, 0.65825, 0.66783, 0.74226, 0.5915, 0.66  
077, 0.65511, 0.68722, 0.7737, 0.6714, 0.18209, 0.18365, 0.18038, 0.17756, 0.17  
784, 0.18075, 0.18653, 0.18569, 0.18283, 0.18115, 0.18966, 0.18449, 0.18701, 0.  
18964, 0.19316, 0.18945, 0.18047, 1.0843, 1.1461, 1.2327, 1.1201, 1.2082, 1.232  
7, 1.2086, 0.65502, 0.8573, 0.57507, 0.8279, 0.62461, 0.70086, 0.60535, 0.692, 0  
.68738, 0.60901, 0.53914, 0.17816, 0.17246, 0.18718, 0.18091, 0.18066, 0.18278  
, 0.17719, 0.17105, 0.18288, 0.18136, 0.18492, 0.18487, 0.18021, 0.17856, 0.200  
58, 0.18712, 0.17679, 0.1803, 1.0602, 1.1722, 1.1375, 1.0659, 1.1648, 1.2427, 1.  
0685, 0.63999, 0.62792, 0.65076, 0.75088, 0.5699, 0.68944, 0.60028, 0.69653, 0.  
67284, 0.61958, 0.64903, 0.18293, 0.17622, 0.1805, 0.17974, 0.18054, 0.17856, 0  
.1803, 0.18569, 0.18317, 0.18442, 0.18636, 0.1915, 0.18817, 0.18016, 0.19861, 0  
.1927, 0.17897, 0.18238, 0.17623, 1.1017, 1.1662, 0.99978, 1.1317, 1.082, 1.062  
3, 1.1686, 0.68391, 0.66872, 0.60552, 0.57524, 0.6589, 0.64708, 0.59291, 0.6888  
7, 0.60467, 0.65064, 0.59395, 0.69998, 0.18124, 0.17331, 0.18417, 0.18008, 0.18  
607, 0.18117, 0.18308, 0.19072, 0.17639, 0.18583, 0.18402, 0.18068, 0.18608, 0.  
18747, 0.18299, 0.18659, 0.18952, 0.18921, 1.1481, 1.0538, 1.1544, 1.0841, 1.16  
55, 1.2176, 1.1105, 0.69105, 0.60889, 0.667, 0.62678, 0.67786, 0.53785, 0.72258  
, 0.5951, 0.70879, 0.6614, 0.65369, 0.69069, 0.18057, 0.18113, 0.18319, 0.19551  
, 0.18282, 0.18683, 0.19608, 0.18574, 0.18568, 0.18881, 0.19536, 0.19399, 0.182  
33, 0.1923, 0.18092, 0.18664, 0.17792, 0.18542, 1.1983, 1.1786, 1.1074, 1.0712,  
1.1581, 1.2047, 1.0779, 1.1118, 1.1311, 0.59025, 0.69505, 0.73439, 0.67116, 0.5

7787,0.67915,0.63571,0.62848,0.68355,0.65521,0.66221,0.17442,0.1816,0.18757,0.18746,0.18322,0.18406,0.18129,0.1895,0.18783,0.18282,0.18005,0.19141,0.18221,0.18963,0.18542,0.18947,0.18864,0.18959,1.0796,1.1264,1.1308,1.1684,1.1067,1.2159,1.1399,1.1632,1.152,0.66066,0.67462,0.53343,0.48591,0.57489,0.48015,0.47095,0.46923,0.47702,0.48707,0.54244,0.18357,0.19306,0.18627,0.18636,0.18445,0.1857,0.17961,0.18953,0.19198,0.1844,0.18261,0.18374,0.1975,0.19065,0.19467,0.18278,0.17933,0.18367,1.1454,1.101,1.1076,1.054,1.1341,1.1833,1.0394,1.0453,1.2262,0.69577,0.49206,0.40544,0.48339,0.34388,0.52544,0.47777,0.54732,0.48356,0.53637,0.46336,0.18715,0.19148,0.19131,0.18708,0.17955,0.19078,0.19172,0.19334,0.18619,0.19239,0.19517,0.18884,0.18333,0.2024,0.19308,0.17903,0.19096,0.18646,1.1534,1.1354,1.1937,1.0593,1.2115,1.1568,1.0884,0.68622,0.77133,0.5938,0.53539,0.38061,0.50147,0.43041,0.4445,0.46618,0.47267,0.50816,0.55863,0.4844,0.19076,0.18661,0.18644,0.18048,0.18806,0.17909,0.18905,0.18302,0.18723,0.19148,0.18417,0.18535,0.18026,0.18473,0.19075,0.18261,0.19984,0.18982,1.0834,1.1329,1.1143,1.0033,1.1726,1.1713,0.65223,0.66751,0.60396,0.59969,0.58122,0.60487,0.46315,0.47728,0.5061,0.54172,0.51973,0.51578,0.50675,0.49566,0.18888,0.18776,0.18202,0.18053,0.1922,0.18835,0.18214,0.18375,0.18406,0.18572,0.18725,0.17923,0.18851,0.18642,0.19604,0.19959,0.18335,0.1811,1.1655,1.1968,1.2336,1.1685,1.0962,0.66116,0.62944,0.61959,0.63197,0.67594,0.67327,0.49374,0.49073,0.50505,0.44361,0.49519,0.48803,0.39706,0.43673,0.45638,0.18371,0.18414,0.18294,0.18405,0.18858,0.17976,0.1948,0.18445,0.18578,0.18109,0.18856,0.19463,0.19221,0.19165,0.19261,0.17539,0.18018,0.18607,1.1579,1.1422,1.0901,0.67083,0.79944,0.6833,0.68283,0.65558,0.79803,0.55667,0.63345,0.54745,0.47115,0.41061,0.47474,0.49465,0.49428,0.51588,0.48474,0.54147,0.18538,0.19209,0.1835,0.19109,0.18245,0.18931,0.19023,0.20259,0.18129,0.1818,0.20042,0.19046,0.19008,0.19429,0.19036,0.18982,0.19669,0.17717,1.1095,0.64825,0.84276,0.66828,0.66359,0.65563,0.62506,0.69323,0.64067,0.63306,0.52537,0.36086,0.49665,0.50625,0.44174,0.48244,0.37547,0.55083,0.4918,0.18028,0.19141,0.19074,0.19043,0.19137,0.1985,0.19203,0.18954,0.18988,0.17993,0.19121,0.18236,0.18394,0.19149,0.19251,0.18939,0.19054,0.18882,0.70131,0.59722,0.79154,0.59582,0.65569,0.70136,0.73654,0.6042,0.6963,0.69846,0.49461,0.5244,0.47253,0.54068,0.32273,0.41366,0.50926,0.4832,0.44436,0.1868,0.18539,0.18955,0.18182,0.18637,0.17431,0.18379,0.18634,0.18728,0.18612,0.19201,0.18253,0.19166,0.18872,0.17756,0.19261,0.18638,0.18715,0.58858,0.61988,0.60281,0.66094,0.65896,0.66989,0.80969,0.5515,0.65849,0.70829,0.50227,0.51053,0.49283,0.49313,0.52925,0.52301,0.44614,0.44464,0.19263,0.1837,0.1896,0.19098,0.1805,0.1881,0.19611,0.18502,0.19179,0.19657,0.19192,0.19174,0.17476,0.19118,0.19305,0.18978,0.17914,0.18031,0.20822,0.64265,0.68355,0.60855,0.67016,0.69113,0.75865,0.5323,0.58636,0.62661,0.66207,0.51913,0.48831,0.52341,0.47142,0.49841,0.55618,0.51513,0.45376,0.17786,0.19784,0.17815,0.1744,0.19427,0.1897,0.19403,0.19965,0.19086,0.18588,0.18159,0.18838,0.18625,0.18698,0.18559,0.19092,0.19092,0.2053,0.19218,0.18323,0.61039,0.7675,0.52346,0.64774,0.6527,0.66973,0.65208,0.64859,0.7356,0.41445,0.49924,0.4768,0.50538,0.54384,0.47133,0.18684,0.18174,0.18404,0.17738,0.1877,0.18816,0.19442,0.18135,0.17799,0.19012,0.17803,0.18711,0.17991,0.18697,0.18538,0.19568,0.18681,0.1857,0.18989,0.19531,0.19614,0.19824,0.64596,0.68217,0.58196,0.58424,0.7547,0.75016,0.57844,0.68771,0.68482,0.52757,0.53662,0.48294,0.18662,0.18405,0.18954,0.18395,0.19003,0.18682,0.18796,0.19704,0.18656,0.18202,0.18262,0.18554,0.18645,0.18144,0.183



24,0.18869,0.18986,0.18825,0.17389,0.18287,0.20157,0.18395,0.20102,0.19862,0.18549,0.19842,0.66308,0.71338,0.73262,0.6681,0.61072,0.60726,0.66161,0.78576,0.18935,0.19032,0.18985,0.19386,0.18285,0.18137,0.17682,0.18187,0.19111,0.19369,0.18624,0.18315,0.18205,0.19178,0.18335,0.18579,0.18687,0.18822,0.17718,0.18675,0.18706,0.18528,0.18798,0.19447,0.20169,0.18767,0.1756,0.19637,0.19468,0.59556,0.67118,0.60523,0.61754,0.68308,0.18486,0.19765,0.18838,0.18151,0.17738,0.18966,0.18556,0.18744,0.18684,0.18247,0.18389,0.18077,0.19197,0.19298,0.18866,0.18371,0.17924,0.1802,0.19362,0.18594,0.18955,0.17918,0.17576,0.19662,0.20554,0.1933,0.19323,0.19486,0.19096,0.17923,0.19278,0.18614,0.17836,0.66435,0.69112,0.20586,0.19504,0.19606,0.19385,0.18157,0.19133,0.18549,0.18659,0.18178,0.1871,0.19064,0.18874,0.18881,0.18131,0.18631,0.19573,0.18535,0.19084,0.18859,0.18249,0.18453,0.18552,0.18431,0.19709,0.18029,0.18772,0.19275,0.19222,0.19652,0.19233,0.19162,0.20298,0.19177,0.19873,0.19435,0.1939,0.18643,0.19034,0.18322,0.19998,0.18665,0.18204,0.1863,0.18738,0.18073,0.18133,0.1931,0.18466,0.18099,0.18739,0.19061,0.19403,0.17419,0.18563,0.18894,0.1873,0.19206,0.19089,0.19081,0.19589,0.18798,0.19537,0.19986,0.18795,0.20392,0.19439,0.18966,0.19652,0.1884,0.1957,0.19608,0.1978,0.18878,0.18326,0.19285,0.18105,0.19496,0.18025,0.18773,0.17274,0.19151,0.18741,0.18256,0.18233,0.18245,0.18817,0.18684,0.19073,0.18298,0.18488,0.19486,0.1809,0.18362,0.18203,0.19103,0.20083,0.18411,0.18315,0.18179,0.18968,0.18876,0.20097,0.19231,0.18963,0.19246,0.19792,0.19223,0.18883,0.19738,0.18189,0.18866,0.18998,0.1882,0.18421,0.1891,0.18584,0.18688,0.17953,0.19596,0.18991,0.20071,0.18275,0.20285,0.19199,0.19971,0.19964,0.20022,0.20235,0.18336,0.19755,0.19738,0.1887,0.19208,0.18873,0.18347,0.19063,0.19081,0.19273,0.17865,0.19577,0.19213,0.1955,0.19732,0.19126,0.19258,0.18351,0.18884,0.18614,0.19209,0.19781,0.19753,0.18356,0.19069,0.1804,0.18653,0.18856,0.18999,0.18951,0.2059,0.19242,0.20197,0.18465,0.20928,0.19694,0.18277,0.18557,0.18937,0.20102,0.19405,0.1901,0.18249,0.19201,0.20436,0.19396,0.19066,0.19334,0.18591,0.18908,0.197,0.20037,0.19484,0.19077,0.18898,0.18626,0.18723,0.18461,0.20211,0.19921,0.19763,0.19729,0.18551,0.19424,0.1875,0.18945,0.19565,0.1927,0.18588,0.19157,0.19048,0.20082,0.19845,0.19406,0.18448,0.19855,0.19251,0.19121,0.19641,0.19373,0.18443,0.18541,0.19905,0.1857,0.17889,0.19702,0.19805,0.18917,0.18837,0.18818,0.19619,0.1783,0.19223,0.19721,0.19201,0.19151,0.18908,0.19265,0.19499,0.18469,0.19169,0.19034,0.19125,0.18985,0.19624,0.19464,0.17844,0.19838,0.18524,0.18636,0.18944,0.18964,0.19105,0.20047,0.19329,0.18827,0.20188,0.19029,0.17656,0.1931,0.20059,0.19613,0.1908,0.20431,0.19283,0.18642,0.1896,0.19726,0.19056,0.18975,0.1936,0.19683,0.20095,0.18199,0.19926,0.18672,0.1885,0.18508,0.19624,0.19135,0.19566,0.19251,0.19761,0.19219,0.18503,0.19827,0.18677,0.19187,0.19293,0.1969,0.18739,0.18522,0.18875,0.19779,0.19156,0.18883,0.18777,0.1829,0.2038,0.20107,0.20249,0.20086,0.20034,0.19014,0.18511,0.18838,0.19917,0.19133,0.19067,0.19072,0.19653,0.20518,0.19408,0.18236,0.19216,0.19668,0.18238,0.19795,0.18325,0.19934,0.2018,0.20004,0.19338,0.20065,0.19692,0.18865,0.19918,0.19517,0.20695,0.1883,0.19298,0.19707,0.20245,0.1952,0.19003,0.19593,0.19999,0.18886,0.184,0.20127,0.18745,0.19228,0.19308,0.18495,0.18086,0.19254,0.18557,0.19883,0.18032,0.18456,0.19281,0.19359,0.19636,0.182140.18107,0.18208,0.17625,0.17186,0.17421,0.17188,0.17253,0.17239,0.18265,0.16878,0.18337,0.17846,0.17862,0.17462,0.17448,0.17354,0.17429,0.17309,0.17297,0.16899,0.53107,0.53026,0.58658,0.48469,0.17161,0.16761,0.

16896,0.17293,0.17144,0.17947,0.17129,0.17626,0.17061,0.17456,0.18001,  
0.17635,0.17163,0.17856,0.16731,0.82987,0.47162,0.48651,0.39771,0.4993  
3,0.47617,0.42479,0.16764,0.17831,0.18049,0.18159,0.17415,0.16582,0.16  
737,0.16875,0.17973,0.1763,0.18543,0.17975,0.17421,0.17604,0.17752,0.7  
9717,0.7466,0.48461,0.45684,0.4791,0.51235,0.51778,0.47319,0.52467,0.5  
338,0.17085,0.17691,0.17338,0.17581,0.17711,0.17574,0.17853,0.17563,0.  
17628,0.1789,0.17011,0.17528,0.17164,0.17415,0.16787,0.78883,0.81345,0.  
.8408,0.5233,0.52644,0.44957,0.4549,0.45592,0.55282,0.46459,0.38798,0.  
56688,0.17427,0.17859,0.17796,0.17574,0.17905,0.16931,0.17416,0.17468,  
0.17427,0.17629,0.16966,0.16493,0.17939,0.17123,0.17552,0.1846,0.78983  
,0.77159,0.86126,0.86978,0.53773,0.48759,0.56103,0.47668,0.49492,0.539  
14,0.57174,0.52861,0.49476,0.51543,0.17947,0.16786,0.17752,0.17867,0.1  
8263,0.17744,0.18246,0.17205,0.18247,0.17587,0.16868,0.17539,0.17483,0.  
.17209,0.18569,0.18035,0.76234,0.7622,0.86903,0.83762,0.82677,0.69411,  
0.42018,0.46423,0.54223,0.54787,0.53282,0.51263,0.42269,0.45686,0.5738  
7,0.51579,0.17579,0.18267,0.18254,0.18237,0.18048,0.17349,0.17929,0.17  
853,0.17354,0.17069,0.17783,0.17704,0.1872,0.16894,0.1788,0.1676,0.170  
95,0.80446,0.78423,0.86598,0.8562,0.8194,0.7202,0.47438,0.56615,0.5022  
6,0.54869,0.54608,0.45335,0.50539,0.51968,0.53082,0.61768,0.53342,0.17  
873,0.17775,0.1769,0.17354,0.17303,0.17035,0.18261,0.17953,0.17695,0.1  
7485,0.17986,0.17934,0.18186,0.17074,0.17087,0.1676,0.17403,0.76463,0.  
85182,0.91815,0.81989,0.88465,0.88131,0.89519,0.49203,0.62844,0.46157,  
0.6229,0.49846,0.52805,0.46314,0.54775,0.53177,0.45983,0.44328,0.17196  
,0.16929,0.18429,0.17877,0.17337,0.17939,0.17048,0.16397,0.17927,0.176  
2,0.17876,0.16764,0.15745,0.1616,0.17875,0.16794,0.15457,0.17584,0.772  
24,0.92055,0.87178,0.79336,0.91411,0.97822,0.74811,0.51151,0.50956,0.5  
1492,0.58051,0.46742,0.53528,0.48791,0.5388,0.50034,0.46865,0.4922,0.1  
7347,0.17208,0.17405,0.17413,0.17668,0.17247,0.17625,0.17642,0.17446,0.  
.15798,0.16611,0.1721,0.16973,0.1596,0.17441,0.17286,0.16312,0.1629,0.  
17109,0.789,0.85725,0.71689,0.84388,0.76712,0.75594,0.90189,0.53036,0.  
53444,0.47449,0.45284,0.5131,0.51021,0.4673,0.51648,0.47462,0.49438,0.  
45778,0.54055,0.17957,0.16693,0.17383,0.17286,0.17939,0.17251,0.16405,  
0.16979,0.15684,0.16198,0.16449,0.15864,0.16887,0.16811,0.16768,0.1635  
6,0.17191,0.16603,0.86475,0.75194,0.89433,0.77867,0.84605,0.86584,0.84  
691,0.52337,0.4612,0.51162,0.46677,0.5333,0.4224,0.5592,0.44203,0.5477  
8,0.52296,0.51392,0.53114,0.17315,0.17717,0.17731,0.17583,0.16432,0.16  
153,0.1729,0.16759,0.16598,0.17274,0.17325,0.17321,0.16271,0.17011,0.1  
6048,0.17054,0.16193,0.16398,0.91392,0.8909,0.79333,0.79319,0.87111,0.  
93355,0.81678,0.82852,0.84908,0.459,0.53334,0.56294,0.51658,0.43945,0.  
51569,0.48219,0.47773,0.52538,0.50034,0.50171,0.15441,0.16218,0.16981,  
0.16584,0.16665,0.16253,0.1636,0.17274,0.16749,0.1611,0.16225,0.17293,  
0.16072,0.16539,0.16553,0.16806,0.17006,0.1647,0.83372,0.83037,0.87276  
,0.88897,0.84094,0.88425,0.83115,0.89378,0.90001,0.5108,0.51948,0.4213  
1,0.37838,0.43972,0.37288,0.37562,0.36306,0.36382,0.38222,0.41191,0.16  
176,0.16981,0.16765,0.16478,0.16042,0.16175,0.16457,0.1706,0.1665,0.16  
637,0.16718,0.16382,0.17617,0.1694,0.16991,0.16002,0.15984,0.15959,0.8  
6791,0.84114,0.86536,0.79642,0.89241,0.88679,0.71585,0.73301,0.94082,0.  
.5057,0.39129,0.3252,0.37921,0.27632,0.41933,0.35982,0.42126,0.36825,0.  
.41628,0.36704,0.16516,0.1666,0.17316,0.15848,0.1603,0.17066,0.17216,0.  
.17196,0.16555,0.17597,0.17099,0.17117,0.16814,0.17471,0.17118,0.1564,  
0.16701,0.16742,0.83291,0.83785,0.85793,0.79632,0.90737,0.87832,0.8128  
2,0.50765,0.6193,0.45383,0.41181,0.30074,0.38813,0.33525,0.33918,0.372

91,0.37478,0.3804,0.4487,0.36444,0.17173,0.1658,0.1653,0.1595,0.17001,  
0.15988,0.17002,0.16103,0.16875,0.17257,0.16128,0.16392,0.16322,0.1627  
6,0.17284,0.16366,0.17376,0.16521,0.78601,0.83589,0.83406,0.69705,0.88  
783,0.89967,0.50733,0.51631,0.44515,0.43856,0.41478,0.45312,0.34895,0.  
36998,0.38613,0.42226,0.38212,0.40915,0.3782,0.40235,0.16725,0.16758,0  
.16629,0.16221,0.17116,0.16724,0.16137,0.16424,0.16559,0.17072,0.16429  
,0.16009,0.17088,0.16315,0.17107,0.17427,0.16237,0.16493,0.9032,0.8878  
3,0.96925,0.90794,0.77545,0.5113,0.46529,0.46305,0.49186,0.52169,0.539  
1,0.40239,0.38652,0.39928,0.34606,0.37402,0.38053,0.30737,0.35502,0.35  
907,0.16621,0.16779,0.15702,0.16487,0.16473,0.16323,0.17091,0.16289,0.  
16499,0.15812,0.16536,0.17349,0.17099,0.16877,0.16584,0.15395,0.15489,  
0.16572,0.82487,0.86494,0.80569,0.4966,0.57888,0.52185,0.53654,0.49886  
,0.59381,0.42983,0.50465,0.43622,0.37041,0.33741,0.36326,0.38887,0.388  
86,0.39331,0.39327,0.42733,0.16275,0.17191,0.16314,0.1672,0.16054,0.17  
295,0.17129,0.18105,0.16098,0.16041,0.1748,0.17139,0.16804,0.17573,0.1  
5977,0.17032,0.17526,0.16385,0.8163,0.48944,0.64644,0.50989,0.48562,0.  
50776,0.47431,0.5428,0.49516,0.47978,0.40553,0.2847,0.38242,0.37615,0.  
3459,0.37109,0.3081,0.43542,0.37978,0.16195,0.17127,0.18021,0.17267,0.  
1739,0.17286,0.17082,0.16738,0.16966,0.1652,0.16956,0.16577,0.16335,0.  
16865,0.17308,0.17006,0.16804,0.1532,0.52612,0.46691,0.59412,0.43116,0  
.49361,0.50772,0.54336,0.44085,0.53521,0.52991,0.38463,0.423,0.3745,0.  
42056,0.25771,0.33832,0.37361,0.38447,0.35045,0.16686,0.17032,0.16656,  
0.16501,0.16821,0.15849,0.16123,0.15921,0.1673,0.16329,0.16758,0.16466  
,0.17613,0.17068,0.16173,0.17063,0.16868,0.15822,0.45017,0.46337,0.440  
8,0.49033,0.47432,0.5019,0.61948,0.44542,0.49641,0.52869,0.39811,0.400  
38,0.36718,0.40017,0.41822,0.40594,0.33562,0.34621,0.17457,0.15721,0.1  
6678,0.17168,0.1598,0.16546,0.17465,0.1663,0.17544,0.1762,0.17287,0.17  
326,0.15639,0.17417,0.1718,0.16754,0.1596,0.16094,0.17151,0.48319,0.52  
768,0.45611,0.51982,0.51364,0.56544,0.41114,0.44787,0.46811,0.50753,0.  
40517,0.36932,0.39926,0.37578,0.38349,0.44614,0.38405,0.34863,0.1587,0  
.17069,0.15734,0.1496,0.17169,0.1695,0.1725,0.17769,0.17156,0.16299,0.  
16466,0.1703,0.16846,0.16351,0.16805,0.16775,0.17128,0.16867,0.15996,0  
.15096,0.4389,0.57616,0.38954,0.49026,0.47955,0.49392,0.4806,0.47124,0  
.57988,0.33811,0.38532,0.36033,0.39573,0.44717,0.36851,0.16416,0.16092  
,0.1601,0.15869,0.16579,0.17346,0.17253,0.1634,0.15759,0.17565,0.15527  
,0.1682,0.15969,0.16622,0.16373,0.1737,0.16547,0.16433,0.15266,0.1623,  
0.15896,0.16174,0.48556,0.49421,0.44758,0.44564,0.61401,0.57971,0.424,  
0.52317,0.52955,0.39829,0.424,0.37068,0.16773,0.1639,0.16439,0.16264,0  
.16922,0.16399,0.17157,0.17422,0.1613,0.15845,0.16286,0.16163,0.16919,  
0.16685,0.16133,0.16765,0.16797,0.16876,0.15298,0.16753,0.16255,0.1563  
3,0.16143,0.16125,0.14556,0.15619,0.49715,0.52797,0.56125,0.4969,0.442  
24,0.4603,0.49277,0.6007,0.17332,0.16914,0.16747,0.17531,0.16285,0.160  
71,0.15432,0.16266,0.16278,0.16985,0.16827,0.16354,0.159,0.17092,0.164  
08,0.16555,0.16423,0.17023,0.15867,0.16426,0.16671,0.16556,0.16763,0.1  
5934,0.16242,0.14997,0.1462,0.1594,0.15696,0.4421,0.51518,0.44713,0.45  
557,0.51936,0.14887,0.1643,0.17068,0.16618,0.16407,0.16459,0.16834,0.1  
6724,0.16612,0.16422,0.16516,0.1593,0.17114,0.17164,0.16525,0.1661,0.1  
614,0.1585,0.17386,0.16782,0.169,0.15775,0.15884,0.16171,0.16845,0.158  
36,0.15696,0.15799,0.15615,0.14364,0.15637,0.15195,0.1407,0.50041,0.49  
224,0.16942,0.16582,0.15599,0.155,0.16001,0.17122,0.16624,0.16135,0.15  
518,0.16705,0.17146,0.16751,0.16464,0.15875,0.1665,0.17458,0.16668,0.1  
7079,0.1696,0.16546,0.16454,0.16646,0.16721,0.16269,0.14883,0.15783,0.

15311,0.15664,0.1612,0.15561,0.15593,0.16678,0.15846,0.16195,0.15527,0.15328,0.15214,0.15677,0.15086,0.15922,0.16485,0.15669,0.1632,0.16573,0.15911,0.1616,0.17342,0.16202,0.16562,0.1713,0.16894,0.16716,0.15796,0.16879,0.1684,0.16761,0.16023,0.15699,0.16052,0.1594,0.15185,0.16253,0.16104,0.15975,0.1698,0.16157,0.15629,0.15903,0.15311,0.15673,0.15875,0.16041,0.1535,0.15132,0.15895,0.16102,0.17403,0.1588,0.16643,0.15273,0.16873,0.16373,0.1632,0.16107,0.16038,0.16586,0.1706,0.16851,0.1472,0.14828,0.15635,0.1489,0.14822,0.15155,0.15758,0.16685,0.14832,0.14738,0.14734,0.15567,0.15586,0.16531,0.16293,0.15923,0.16117,0.16375,0.15555,0.15319,0.16208,0.16281,0.16733,0.17155,0.16437,0.16024,0.16794,0.16639,0.16426,0.15856,0.15956,0.1538,0.1655,0.15104,0.17034,0.16028,0.16406,0.16416,0.16122,0.1673,0.15139,0.16137,0.16162,0.15149,0.15597,0.15404,0.1457,0.156,0.15258,0.16539,0.14291,0.16219,0.15451,0.16035,0.16067,0.16628,0.17434,0.16653,0.17073,0.14674,0.15703,0.16097,0.16402,0.15092,0.15692,0.14881,0.14933,0.15509,0.15456,0.15504,0.16895,0.15243,0.16526,0.15362,0.17521,0.16483,0.14783,0.15068,0.15065,0.16823,0.15413,0.15476,0.14837,0.15311,0.16995,0.15965,0.15685,0.15828,0.15204,0.15521,0.15717,0.16483,0.1576,0.15668,0.15529,0.15562,0.14744,0.14841,0.16501,0.16159,0.16126,0.16336,0.15346,0.15937,0.15164,0.15587,0.15798,0.15506,0.14832,0.16061,0.15033,0.16651,0.16361,0.15772,0.15023,0.16155,0.16371,0.15365,0.15681,0.16278,0.15294,0.14838,0.16391,0.147,0.14775,0.16335,0.16491,0.15254,0.15334,0.1524,0.16406,0.14785,0.1559,0.15989,0.15389,0.15113,0.15163,0.15742,0.15477,0.15041,0.1541,0.15256,0.15682,0.15377,0.16135,0.15689,0.14836,0.16498,0.14877,0.14779,0.15402,0.15728,0.157,0.16342,0.15589,0.15195,0.1684,0.15561,0.14476,0.15557,0.16949,0.15308,0.15442,0.16939,0.16007,0.15745,0.15818,0.16207,0.15952,0.15597,0.15828,0.16192,0.16442,0.1442,0.16496,0.14849,0.15433,0.14657,0.15619,0.15748,0.15538,0.15432,0.15952,0.15414,0.14632,0.1582,0.15444,0.15786,0.16109,0.16222,0.14921,0.1485,0.15376,0.16415,0.1581,0.15653,0.1524,0.14889,0.17166,0.16235,0.16679,0.1672,0.15991,0.16037,0.14626,0.15287,0.1645,0.15652,0.1519,0.15429,0.16121,0.16979,0.15398,0.15091,0.15405,0.15931,0.14587,0.15815,0.1469,0.16443,0.16349,0.16527,0.15846,0.16746,0.16238,0.15894,0.16336,0.15816,0.1755,0.15347,0.15947,0.15946,0.16656,0.15806,0.15881,0.15944,0.16586,0.15223,0.14492,0.16706,0.15361,0.1584,0.1537,0.14733,0.14653,0.15372,0.14898,0.15998,0.14742,0.15181,0.15491,0.15611,0.16567,0.15040.16704,0.17132,0.16228,0.15545,0.16026,0.15789,0.15639,0.15869,0.1692,0.15378,0.16925,0.16397,0.16359,0.16098,0.16183,0.1609,0.16115,0.15831,0.15773,0.15543,0.42735,0.45029,0.47555,0.41171,0.15738,0.15594,0.15625,0.15994,0.1589,0.16452,0.15936,0.16392,0.15761,0.15841,0.16469,0.16396,0.15765,0.16598,0.15435,0.66447,0.38167,0.40657,0.32045,0.40387,0.37728,0.33913,0.15328,0.16173,0.16437,0.16742,0.16155,0.15422,0.15481,0.1558,0.16584,0.16456,0.17022,0.16544,0.16049,0.16443,0.16525,0.60263,0.59738,0.39225,0.37927,0.37146,0.44068,0.40296,0.38749,0.41863,0.44062,0.15912,0.16427,0.16086,0.16541,0.16381,0.16669,0.16481,0.16599,0.16412,0.16672,0.15578,0.16608,0.15564,0.16197,0.15415,0.62985,0.63398,0.64023,0.42399,0.43251,0.3656,0.35477,0.35351,0.43112,0.37654,0.33693,0.46565,0.1603,0.16484,0.16541,0.15992,0.16689,0.16044,0.16098,0.16284,0.16484,0.16315,0.15443,0.15417,0.16817,0.1592,0.16,0.16815,0.57879,0.59726,0.66598,0.69267,0.44865,0.38027,0.45055,0.38543,0.399,0.436,0.4587,0.41266,0.40632,0.41816,0.16796,0.15717,0.16626,0.16834,0.16778,0.16399,0.16483,0.16004,0.16878,0.1641,0.15418,0.16239,0.16152,0.15786,

0.17279,0.16916,0.60136,0.5659,0.66909,0.67762,0.64783,0.5206,0.34101,  
0.3506,0.43272,0.44443,0.42756,0.39988,0.33778,0.37751,0.44176,0.44569  
,0.16176,0.17031,0.16735,0.1654,0.16671,0.15783,0.16674,0.16524,0.1617  
5,0.1585,0.16363,0.16272,0.17629,0.15613,0.16369,0.15467,0.15661,0.653  
49,0.55267,0.67638,0.72703,0.61318,0.50262,0.40028,0.44787,0.41683,0.4  
2984,0.4194,0.36748,0.42186,0.42057,0.43411,0.49092,0.43071,0.1651,0.1  
6706,0.16311,0.16347,0.16087,0.15797,0.16899,0.1657,0.16482,0.16015,0.  
16863,0.1679,0.16863,0.14854,0.1487,0.1444,0.16259,0.61819,0.68093,0.7  
0938,0.65726,0.65503,0.7009,0.70014,0.39954,0.51807,0.38452,0.46608,0.  
4183,0.45442,0.36439,0.43168,0.42716,0.37326,0.36791,0.16193,0.15449,0  
.17032,0.1691,0.15948,0.16675,0.15817,0.14753,0.16428,0.16327,0.16599,  
0.14636,0.1349,0.13995,0.15736,0.14538,0.13276,0.16673,0.61666,0.75392  
,0.68103,0.58398,0.76103,0.76859,0.6356,0.41901,0.42967,0.3908,0.48294  
,0.38051,0.45433,0.41623,0.43275,0.40591,0.35718,0.40726,0.15972,0.158  
08,0.16394,0.1593,0.16256,0.16389,0.16481,0.16259,0.16175,0.13673,0.14  
077,0.14595,0.14601,0.13849,0.15269,0.1526,0.14718,0.1416,0.15645,0.61  
325,0.69722,0.58197,0.67156,0.59107,0.53643,0.74699,0.42835,0.43076,0.  
38503,0.35847,0.41607,0.42023,0.39587,0.42201,0.39057,0.39986,0.38751,  
0.44639,0.16943,0.16163,0.16406,0.15815,0.17006,0.15939,0.14307,0.146,  
0.1357,0.14114,0.14133,0.13673,0.14622,0.14797,0.14679,0.14121,0.15089  
,0.14606,0.67298,0.58508,0.79692,0.56077,0.70574,0.69242,0.6782,0.4171  
1,0.35657,0.39839,0.38789,0.43323,0.35216,0.46242,0.34117,0.45504,0.43  
577,0.41392,0.42447,0.16027,0.16122,0.16248,0.15455,0.14297,0.13708,0.  
15265,0.15192,0.14424,0.14938,0.15505,0.15292,0.14498,0.14405,0.14047,  
0.15134,0.14336,0.14346,0.73698,0.67154,0.63386,0.6264,0.72204,0.81371  
,0.63543,0.69366,0.64879,0.37961,0.42809,0.43152,0.42652,0.36962,0.419  
26,0.39748,0.3933,0.41155,0.3953,0.41822,0.13548,0.14043,0.14687,0.144  
6,0.14283,0.14496,0.14003,0.15422,0.14523,0.13986,0.14012,0.15159,0.13  
698,0.14226,0.14251,0.1471,0.14792,0.14225,0.63997,0.65249,0.6999,0.72  
092,0.66608,0.71441,0.67677,0.75563,0.72902,0.43265,0.41347,0.3344,0.3  
014,0.37157,0.31216,0.29849,0.29112,0.2883,0.31463,0.34452,0.13712,0.1  
4576,0.1408,0.13928,0.13926,0.13988,0.14161,0.14886,0.14637,0.14428,0.  
14432,0.14346,0.15212,0.14544,0.14763,0.13284,0.14085,0.13887,0.69134,  
0.65105,0.67068,0.60527,0.70325,0.6851,0.52606,0.58209,0.72982,0.39602  
,0.32859,0.27435,0.29928,0.22767,0.34353,0.27129,0.34722,0.31776,0.346  
16,0.31619,0.13956,0.14575,0.14905,0.13669,0.14069,0.14745,0.15286,0.1  
4605,0.14282,0.15156,0.14797,0.14646,0.14765,0.14796,0.14879,0.134,0.1  
4788,0.14791,0.61733,0.67995,0.68886,0.66952,0.68913,0.68941,0.65346,0  
.38703,0.49801,0.38582,0.30866,0.25172,0.30029,0.26346,0.27483,0.29984  
,0.29463,0.30428,0.36533,0.30401,0.14914,0.14459,0.14332,0.13762,0.150  
49,0.13345,0.14339,0.13982,0.14797,0.14824,0.13926,0.14067,0.14608,0.1  
3947,0.14945,0.14012,0.15312,0.14131,0.58419,0.65279,0.66939,0.53837,0  
.72306,0.71288,0.38422,0.40517,0.34823,0.34057,0.3504,0.3782,0.27005,0  
.30382,0.3122,0.33982,0.31408,0.33511,0.30011,0.32347,0.1442,0.14925,0  
.14327,0.14156,0.15041,0.14566,0.14337,0.14225,0.1462,0.14966,0.14011,  
0.13894,0.14774,0.14519,0.14637,0.15025,0.13971,0.14142,0.68054,0.7078  
8,0.79752,0.72693,0.58612,0.42308,0.35764,0.38346,0.3812,0.40452,0.412  
23,0.32719,0.32161,0.32128,0.27396,0.31744,0.31456,0.26264,0.29674,0.2  
8226,0.14724,0.14182,0.13477,0.14271,0.14249,0.1494,0.14792,0.13867,0.  
14175,0.13525,0.1437,0.15289,0.1482,0.1421,0.1436,0.13106,0.12948,0.14  
461,0.65304,0.67997,0.63074,0.38841,0.43187,0.38637,0.41583,0.41518,0.  
45691,0.31179,0.39093,0.35779,0.30487,0.28522,0.29706,0.31795,0.30951,

0.30759,0.32032,0.36239,0.14102,0.15106,0.13974,0.14458,0.14134,0.1508  
8,0.14818,0.1561,0.13927,0.1366,0.15144,0.15079,0.14421,0.15383,0.1393  
8,0.14463,0.15109,0.14499,0.60969,0.39416,0.54287,0.40187,0.38302,0.39  
09,0.36942,0.42195,0.37616,0.36914,0.33718,0.23864,0.31432,0.29847,0.2  
9164,0.29032,0.24824,0.37007,0.3152,0.1372,0.14475,0.1586,0.14809,0.15  
363,0.14802,0.14833,0.14321,0.15119,0.14524,0.14803,0.14212,0.13955,0.  
14658,0.15048,0.14541,0.14309,0.12201,0.41988,0.37074,0.47579,0.33374,  
0.36476,0.40698,0.41876,0.34429,0.39431,0.42193,0.32629,0.34095,0.3057  
8,0.34509,0.20882,0.28406,0.30728,0.299,0.28595,0.14481,0.15182,0.1475  
4,0.1462,0.14503,0.13861,0.1385,0.13644,0.14329,0.14077,0.14535,0.1420  
8,0.15624,0.15181,0.14627,0.14999,0.14475,0.128,0.3459,0.38305,0.3392,  
0.37356,0.34806,0.38488,0.50433,0.33903,0.37781,0.43238,0.33031,0.3317  
8,0.29838,0.33413,0.35166,0.32237,0.26299,0.26896,0.15581,0.1371,0.145  
42,0.15195,0.1359,0.14705,0.15003,0.14442,0.15807,0.15094,0.15108,0.14  
751,0.13239,0.15173,0.14715,0.14362,0.13795,0.14117,0.13933,0.37851,0.  
42493,0.37046,0.41256,0.39293,0.44711,0.34444,0.32931,0.3739,0.41292,0.  
.33335,0.30589,0.31252,0.29546,0.31385,0.37693,0.31393,0.2874,0.13684,  
0.14608,0.13557,0.12855,0.14915,0.15088,0.1494,0.15733,0.15289,0.1415,  
0.14702,0.15285,0.14919,0.14266,0.14908,0.14369,0.15077,0.14054,0.1279  
1,0.12086,0.30883,0.4598,0.32542,0.38316,0.3725,0.39094,0.38083,0.3672  
2,0.46411,0.27146,0.2993,0.26984,0.3205,0.35763,0.30965,0.14561,0.1395  
3,0.13836,0.13644,0.14485,0.1539,0.14853,0.14213,0.13556,0.15496,0.130  
98,0.15009,0.13789,0.14293,0.14085,0.14873,0.14497,0.14403,0.12186,0.1  
3289,0.12318,0.13258,0.36907,0.40507,0.3592,0.36318,0.50346,0.47497,0.  
35667,0.41003,0.42045,0.33205,0.33102,0.31492,0.14761,0.14401,0.14471,  
0.13915,0.14574,0.14126,0.15144,0.15007,0.13559,0.1339,0.14052,0.13814  
,0.14685,0.14306,0.13998,0.14057,0.14323,0.14869,0.13746,0.14918,0.132  
32,0.12579,0.12944,0.13097,0.11648,0.12282,0.39109,0.42496,0.44727,0.3  
8931,0.33607,0.3526,0.40051,0.48471,0.15029,0.14784,0.14845,0.15377,0.  
14239,0.13708,0.1315,0.14215,0.13977,0.14981,0.14459,0.13987,0.14188,0.  
.14828,0.14272,0.14443,0.1401,0.15054,0.13244,0.13994,0.1482,0.14124,0.  
.14697,0.12989,0.13114,0.12071,0.11072,0.12797,0.12717,0.3447,0.41367,  
0.3514,0.36776,0.39196,0.12046,0.13082,0.15039,0.14602,0.14472,0.14682  
,0.14336,0.14501,0.14447,0.14465,0.14202,0.13938,0.15213,0.14607,0.140  
51,0.14502,0.14046,0.13619,0.15382,0.14736,0.14763,0.14373,0.13916,0.1  
338,0.13159,0.12774,0.12618,0.12869,0.12318,0.11506,0.12372,0.12228,0.  
10999,0.37822,0.38858,0.13566,0.1299,0.12369,0.12477,0.14271,0.15034,0.  
.14437,0.13964,0.12977,0.14147,0.14996,0.14369,0.14299,0.13656,0.14206  
,0.15133,0.14626,0.14435,0.14757,0.14809,0.14205,0.14894,0.14407,0.134  
95,0.11648,0.13169,0.12322,0.12112,0.12923,0.12038,0.1215,0.14003,0.12  
099,0.13234,0.12966,0.12396,0.12279,0.12479,0.1176,0.12793,0.14295,0.1  
3566,0.14024,0.14546,0.13724,0.1415,0.15089,0.13961,0.14418,0.1488,0.1  
4442,0.14758,0.13988,0.1485,0.14424,0.14916,0.12938,0.12598,0.12544,0.  
13041,0.12118,0.13251,0.13029,0.12827,0.13698,0.12969,0.12898,0.13172,  
0.1218,0.12568,0.12972,0.13277,0.12443,0.12663,0.12545,0.13744,0.15105  
,0.1402,0.14412,0.13594,0.14346,0.14076,0.14351,0.13574,0.13639,0.1486  
7,0.14549,0.14823,0.1198,0.11732,0.12427,0.12226,0.12384,0.12249,0.125  
26,0.13595,0.1224,0.11993,0.12038,0.12723,0.12586,0.13372,0.13375,0.12  
512,0.13563,0.13164,0.12502,0.12632,0.13077,0.14123,0.1474,0.14976,0.1  
4567,0.13834,0.14547,0.14314,0.13936,0.13458,0.13211,0.12077,0.13211,0.  
.12266,0.13779,0.12744,0.13452,0.13298,0.13111,0.13722,0.12352,0.13151  
,0.13126,0.11964,0.11769,0.12511,0.1136,0.1272,0.12595,0.12663,0.10894

,0.13256,0.12359,0.13086,0.12989,0.14279,0.14964,0.146,0.15235,0.11349  
,0.12158,0.13234,0.12992,0.12641,0.12492,0.11838,0.12188,0.12208,0.122  
66,0.12246,0.13753,0.11906,0.13513,0.12131,0.14365,0.13497,0.12161,0.1  
1777,0.11743,0.13549,0.12081,0.12334,0.11837,0.12584,0.13589,0.12944,0  
.12793,0.12992,0.12142,0.12361,0.12806,0.13786,0.1261,0.12432,0.1258,0  
.12218,0.12262,0.11998,0.12927,0.12802,0.13712,0.12959,0.1247,0.12651,  
0.11948,0.12642,0.12996,0.12396,0.11771,0.12962,0.12103,0.1365,0.12946  
,0.12226,0.11729,0.12564,0.13089,0.1233,0.12369,0.13086,0.12485,0.1170  
7,0.13226,0.11855,0.11514,0.13589,0.13117,0.11992,0.12426,0.12158,0.13  
338,0.11988,0.12143,0.13225,0.12275,0.11887,0.11876,0.12441,0.1335,0.1  
2426,0.12454,0.12562,0.12424,0.11818,0.13258,0.12592,0.11615,0.1308,0.  
11439,0.1204,0.12257,0.12823,0.12773,0.13176,0.12177,0.12152,0.13994,0  
.12512,0.11637,0.12867,0.13568,0.12522,0.12245,0.14042,0.12761,0.12378  
,0.12575,0.12901,0.12599,0.12787,0.12626,0.12938,0.13344,0.11561,0.132  
12,0.11711,0.12118,0.11531,0.12463,0.12667,0.12547,0.12932,0.12496,0.1  
2203,0.11573,0.13043,0.12316,0.12413,0.13133,0.12862,0.12004,0.11595,0  
.1228,0.13494,0.1279,0.12447,0.1206,0.12139,0.1395,0.13122,0.13869,0.1  
3709,0.13209,0.13108,0.11345,0.12378,0.13153,0.12566,0.11892,0.12393,0  
.12874,0.13611,0.12282,0.11772,0.12592,0.1305,0.11999,0.1262,0.11644,0  
.13492,0.13626,0.13452,0.12739,0.1348,0.13156,0.12764,0.13068,0.1272,0  
.14167,0.12246,0.12615,0.12407,0.13457,0.12927,0.12516,0.12964,0.1354,  
0.12526,0.11364,0.13373,0.12176,0.12897,0.12246,0.12187,0.11466,0.1256  
8,0.1226,0.13037,0.11875,0.12257,0.12442,0.12716,0.13403,0.12127  
0.1531,0.15703,0.14715,0.14442,0.14315,0.1447,0.14152,0.14148,0.15479,  
0.14092,0.15583,0.15094,0.14652,0.14521,0.14674,0.14812,0.14475,0.1428  
3,0.14425,0.14171,0.38082,0.37427,0.3977,0.355,0.13798,0.1408,0.14295,  
0.14633,0.14577,0.14912,0.14311,0.14679,0.14268,0.14216,0.14758,0.1462  
7,0.14492,0.14811,0.14056,0.53896,0.3142,0.33818,0.26697,0.32089,0.322  
95,0.29988,0.1393,0.14408,0.14742,0.14841,0.14843,0.1386,0.13899,0.143  
04,0.15007,0.15083,0.1538,0.15175,0.14702,0.15001,0.14694,0.53662,0.45  
835,0.32172,0.31415,0.29464,0.37246,0.35701,0.3289,0.36559,0.36892,0.1  
4415,0.14852,0.14516,0.14766,0.14744,0.14927,0.15238,0.14536,0.15346,0  
.15163,0.13915,0.15391,0.1385,0.14547,0.14131,0.54548,0.5403,0.5492,0.  
36918,0.35369,0.32267,0.28963,0.30519,0.34404,0.31473,0.27834,0.40531,  
0.14572,0.14862,0.15054,0.14474,0.14896,0.14707,0.14376,0.14834,0.1490  
7,0.14916,0.13953,0.13722,0.15213,0.14609,0.14426,0.15283,0.50256,0.52  
165,0.57344,0.55852,0.38468,0.31815,0.40606,0.34214,0.34079,0.36594,0.  
38986,0.33415,0.33617,0.33208,0.15142,0.14038,0.15132,0.15578,0.15165,  
0.1451,0.15036,0.14564,0.15317,0.14888,0.13892,0.14881,0.14854,0.142,0.  
.15745,0.15125,0.53829,0.46649,0.5226,0.57064,0.5166,0.3767,0.30448,0.  
29711,0.37368,0.38917,0.35657,0.35424,0.31382,0.31225,0.37212,0.37993,  
0.14428,0.1518,0.14927,0.14927,0.14768,0.14332,0.15468,0.14925,0.15127  
,0.1441,0.14781,0.14887,0.16071,0.14225,0.14968,0.14429,0.14127,0.5122  
2,0.49049,0.5652,0.68619,0.52001,0.4292,0.33073,0.34225,0.3529,0.35819  
,0.34323,0.28685,0.35063,0.34479,0.36378,0.40599,0.36341,0.14779,0.153  
04,0.14929,0.14919,0.14792,0.13842,0.15221,0.15233,0.14904,0.14398,0.1  
4977,0.15216,0.15168,0.12869,0.12864,0.12389,0.1503,0.52047,0.57092,0.  
57508,0.56537,0.54009,0.58742,0.56717,0.34017,0.44078,0.32874,0.40188,  
0.33687,0.39353,0.30144,0.33983,0.36413,0.30772,0.30923,0.14381,0.1335  
,0.15597,0.15604,0.15067,0.14894,0.14252,0.13564,0.14965,0.14702,0.151  
97,0.1233,0.11702,0.11875,0.13654,0.12632,0.11045,0.15141,0.53643,0.58  
104,0.57472,0.47738,0.66515,0.6533,0.52513,0.34828,0.37887,0.36397,0.4

0291,0.31746,0.39859,0.33431,0.36029,0.32502,0.2803,0.34018,0.14247,0.14337,0.15031,0.14515,0.14962,0.14882,0.15409,0.15052,0.14825,0.11763,0.1197,0.12891,0.12618,0.12207,0.13121,0.13218,0.12892,0.1278,0.1413,0.52468,0.58556,0.43693,0.59503,0.47427,0.43445,0.65128,0.37795,0.36978,0.31116,0.31592,0.35803,0.36504,0.32723,0.35319,0.33509,0.32253,0.33891,0.37638,0.15258,0.14842,0.14908,0.14599,0.15218,0.14306,0.12067,0.12777,0.11719,0.12393,0.12023,0.11689,0.12836,0.12856,0.12924,0.11896,0.13141,0.12336,0.56882,0.51546,0.68043,0.47011,0.6001,0.56861,0.56008,0.38016,0.30472,0.33119,0.33587,0.36431,0.30963,0.39834,0.30137,0.40688,0.36102,0.35054,0.35097,0.14396,0.1467,0.14998,0.13119,0.12765,0.11669,0.13414,0.13105,0.12657,0.12622,0.13358,0.13116,0.12802,0.12544,0.12025,0.13161,0.12243,0.11978,0.63937,0.54616,0.51332,0.50046,0.57462,0.69068,0.52566,0.60902,0.57137,0.32052,0.35584,0.37347,0.37154,0.32823,0.3606,0.34423,0.33959,0.33852,0.31676,0.37287,0.11692,0.12482,0.12382,0.12519,0.12428,0.12249,0.12307,0.13816,0.12752,0.11609,0.12195,0.13161,0.12197,0.12211,0.12404,0.12931,0.13426,0.11831,0.52778,0.52405,0.58735,0.57885,0.60083,0.5639,0.58349,0.67247,0.65175,0.38077,0.33117,0.29329,0.25843,0.29988,0.24386,0.26717,0.23891,0.23071,0.26896,0.27295,0.11963,0.12669,0.12255,0.12057,0.11552,0.11612,0.12361,0.12903,0.12951,0.12941,0.12517,0.12444,0.13212,0.12824,0.13053,0.11641,0.11964,0.11606,0.54221,0.51496,0.54298,0.47487,0.56033,0.55213,0.37733,0.48631,0.54767,0.33133,0.28933,0.2271,0.26154,0.18689,0.27599,0.22081,0.29534,0.25764,0.28899,0.25046,0.11932,0.12688,0.13022,0.1187,0.12171,0.13069,0.13423,0.1225,0.12191,0.13172,0.12704,0.12691,0.12996,0.12777,0.13263,0.11334,0.12921,0.13048,0.49273,0.57613,0.57443,0.53458,0.52667,0.56453,0.52823,0.29761,0.42618,0.2992,0.27108,0.21218,0.24534,0.22441,0.2194,0.2433,0.26191,0.23894,0.30416,0.26012,0.12995,0.12963,0.12328,0.11877,0.13133,0.11501,0.12421,0.1184,0.12698,0.12684,0.12065,0.12338,0.1266,0.11715,0.13116,0.12233,0.13742,0.12005,0.50974,0.57821,0.54828,0.45781,0.61358,0.6177,0.29779,0.34511,0.29146,0.25913,0.2958,0.3273,0.21548,0.2543,0.27012,0.26727,0.27944,0.27887,0.23427,0.28025,0.12793,0.13153,0.12257,0.11949,0.13155,0.1269,0.12434,0.12563,0.13019,0.12862,0.12551,0.11858,0.12935,0.12858,0.12763,0.12904,0.1187,0.12056,0.5644,0.58011,0.65835,0.60506,0.48787,0.34306,0.30372,0.29734,0.31692,0.33093,0.36453,0.26211,0.26742,0.28008,0.23429,0.28149,0.26183,0.21484,0.25493,0.24845,0.12739,0.12481,0.11658,0.12222,0.11997,0.13229,0.12827,0.11905,0.12086,0.11575,0.12095,0.13307,0.12856,0.12532,0.12536,0.11059,0.10584,0.12264,0.55013,0.51853,0.52893,0.34574,0.36212,0.34837,0.35362,0.35537,0.38245,0.26475,0.34799,0.30732,0.27663,0.23816,0.25718,0.28212,0.24255,0.23718,0.25329,0.30171,0.1208,0.12933,0.12147,0.1251,0.12196,0.13243,0.1253,0.13379,0.11806,0.11982,0.12791,0.13266,0.12291,0.13283,0.12034,0.12701,0.13262,0.12909,0.51453,0.31835,0.45707,0.29831,0.29394,0.32886,0.3273,0.36281,0.2979,0.29439,0.2675,0.19989,0.2594,0.24795,0.24269,0.24665,0.22044,0.31531,0.27227,0.11966,0.12239,0.13898,0.13036,0.13103,0.13074,0.13193,0.1234,0.13528,0.12243,0.13104,0.12399,0.12289,0.12764,0.13236,0.1243,0.11973,0.099088,0.36301,0.31204,0.39044,0.28265,0.29142,0.34321,0.34123,0.28599,0.32484,0.34664,0.27483,0.29363,0.26808,0.2937,0.17509,0.24238,0.25575,0.24774,0.22798,0.12872,0.13041,0.13009,0.12688,0.12472,0.12418,0.12125,0.1179,0.12623,0.12036,0.12811,0.12897,0.13631,0.13216,0.13079,0.12933,0.12989,0.10518,0.28513,0.3296,0.26877,0.30839,0.25781,0.30397,0.43107,0.28995,0.3112,0.34958,0.26955,0.27534,0.23824,0.29757,0.30161,0.26784,0.2149,0.21665,0.13657



,0.11456,0.1249,0.13309,0.11745,0.12531,0.13107,0.1263,0.14251,0.13176  
,0.1365,0.12656,0.11471,0.13844,0.12374,0.12506,0.12228,0.12301,0.1177  
,0.32705,0.36965,0.29308,0.34182,0.34159,0.38689,0.30167,0.2581,0.3071  
1,0.32132,0.28535,0.28374,0.25891,0.25707,0.26744,0.34029,0.26076,0.21  
768,0.11565,0.12833,0.11527,0.11043,0.12964,0.13297,0.12876,0.13599,0.  
13607,0.12651,0.13092,0.1306,0.12874,0.12049,0.13044,0.12758,0.13312,0  
.11836,0.10415,0.096571,0.25123,0.35281,0.27916,0.31654,0.30883,0.3326  
6,0.31415,0.29433,0.40136,0.22762,0.25597,0.22706,0.25719,0.30239,0.25  
462,0.13071,0.11942,0.11912,0.12239,0.12825,0.13512,0.12437,0.12359,0.  
11595,0.13679,0.11169,0.13098,0.12085,0.12549,0.12356,0.12828,0.1254,0  
.1249,0.097338,0.10832,0.1033,0.10836,0.28527,0.31072,0.27362,0.30634,  
0.42793,0.41677,0.29507,0.3511,0.35619,0.29341,0.28343,0.26649,0.12548  
,0.12547,0.12335,0.11662,0.12668,0.11934,0.1323,0.13036,0.11621,0.1136  
5,0.12212,0.11591,0.13107,0.12765,0.12322,0.11856,0.12169,0.13047,0.11  
848,0.13044,0.10553,0.10151,0.10909,0.10946,0.092936,0.10557,0.31029,0  
.34999,0.37748,0.31959,0.28634,0.3144,0.3555,0.40662,0.13175,0.12842,0  
.1287,0.13067,0.12238,0.11636,0.10612,0.12041,0.11887,0.12808,0.1261,0  
.12241,0.12119,0.12927,0.1245,0.1224,0.12263,0.12753,0.11468,0.12139,0  
.13046,0.12268,0.12954,0.11197,0.10882,0.096583,0.085892,0.10722,0.097  
368,0.28696,0.34604,0.27898,0.32144,0.34476,0.097385,0.10822,0.13246,0  
.12794,0.12257,0.12522,0.12406,0.12508,0.12328,0.12289,0.12462,0.1245,  
0.13711,0.12402,0.12231,0.12349,0.1211,0.12052,0.13577,0.12587,0.12671  
,0.12318,0.12581,0.10999,0.10658,0.11168,0.10269,0.10572,0.098965,0.09  
4063,0.099443,0.099658,0.085636,0.31081,0.33244,0.11324,0.1108,0.09796  
2,0.10007,0.12128,0.12976,0.12441,0.12117,0.11522,0.1223,0.129,0.12407  
,0.12533,0.11744,0.1211,0.13039,0.12548,0.12821,0.13017,0.13057,0.1217  
3,0.12664,0.12783,0.10955,0.094103,0.10365,0.10321,0.094643,0.10504,0.  
10017,0.094842,0.11491,0.093996,0.10825,0.10657,0.096427,0.10377,0.101  
74,0.09826,0.10809,0.12686,0.1125,0.12257,0.12547,0.12033,0.12045,0.13  
595,0.12069,0.12142,0.13185,0.12511,0.13013,0.12346,0.12854,0.12692,0.  
12949,0.10963,0.10259,0.10026,0.10664,0.096713,0.10919,0.10577,0.10006  
,0.11359,0.10357,0.11117,0.10619,0.096183,0.10337,0.10918,0.10846,0.09  
9064,0.10513,0.10166,0.11523,0.12932,0.12469,0.12328,0.11711,0.1216,0.  
12202,0.12445,0.11934,0.11472,0.12896,0.12743,0.12639,0.10036,0.092772  
,0.10076,0.098202,0.10112,0.099069,0.10828,0.11214,0.097458,0.099405,0  
.10016,0.10602,0.099037,0.11356,0.10454,0.1006,0.11299,0.10842,0.09942  
1,0.10306,0.10648,0.12212,0.12436,0.13154,0.13098,0.11883,0.12585,0.12  
641,0.12164,0.11844,0.10962,0.10136,0.10928,0.10001,0.11465,0.10103,0.  
11164,0.1088,0.10349,0.11049,0.10198,0.11191,0.10636,0.094644,0.097042  
,0.1035,0.092774,0.10361,0.1066,0.10451,0.085841,0.11085,0.104,0.10712  
,0.10325,0.12487,0.13039,0.12695,0.13232,0.090915,0.096039,0.11026,0.1  
0567,0.10458,0.099317,0.095803,0.10146,0.096932,0.10564,0.097608,0.112  
41,0.095471,0.1064,0.094748,0.11748,0.11276,0.098582,0.095525,0.094714  
,0.10843,0.095759,0.092917,0.10179,0.10617,0.1072,0.10675,0.10624,0.10  
592,0.10412,0.10152,0.10021,0.11222,0.10128,0.098312,0.10574,0.10181,0  
.097368,0.096532,0.1024,0.10408,0.11268,0.10646,0.10081,0.10594,0.0922  
88,0.10491,0.10207,0.096218,0.09726,0.1032,0.10136,0.11311,0.10903,0.0  
98397,0.099592,0.098059,0.10672,0.099534,0.098822,0.10453,0.1055,0.097  
066,0.11007,0.098974,0.094647,0.11271,0.10955,0.09765,0.097424,0.09650  
5,0.11046,0.095585,0.097428,0.11115,0.099734,0.10132,0.091393,0.10056,  
0.10274,0.10034,0.10237,0.10005,0.098599,0.096789,0.10558,0.10511,0.09  
5983,0.10413,0.088607,0.095635,0.098926,0.10409,0.11198,0.10699,0.0961

64,0.096534,0.11537,0.098556,0.095442,0.1038,0.11519,0.10702,0.09679,0.11362,0.10424,0.095846,0.10248,0.10663,0.10721,0.10687,0.10365,0.10687,0.10934,0.097255,0.10838,0.096022,0.099101,0.098619,0.10112,0.10345,0.099731,0.10753,0.1029,0.10161,0.092508,0.10626,0.098992,0.097272,0.10727,0.10533,0.095851,0.098358,0.097748,0.11166,0.10351,0.1025,0.094348,0.097779,0.11501,0.1042,0.11513,0.11074,0.11163,0.10743,0.09592,0.10367,0.10661,0.10327,0.092135,0.10213,0.10771,0.11142,0.097446,0.095223,0.099138,0.11071,0.089851,0.10141,0.093273,0.11111,0.10926,0.11241,0.1047,0.10462,0.10665,0.1072,0.10692,0.10485,0.11597,0.10619,0.10342,0.10217,0.11079,0.10362,0.10011,0.10721,0.11222,0.10276,0.09206,0.11033,0.099583,0.10484,0.098662,0.095466,0.09286,0.10457,0.096224,0.10456,0.090869,0.099415,0.10182,0.10388,0.10755,0.10409  
0.13498,0.14114,0.13116,0.13161,0.12672,0.12953,0.12545,0.12794,0.14371,0.12866,0.14892,0.13844,0.1317,0.13222,0.13144,0.1341,0.13293,0.12983,0.13132,0.12552,0.3437,0.3346,0.34377,0.3226,0.12574,0.1319,0.12815,0.13561,0.13222,0.13158,0.12907,0.13533,0.12848,0.12894,0.13646,0.13165,0.13143,0.13546,0.12185,0.44235,0.25716,0.29268,0.24056,0.31677,0.26246,0.28598,0.12858,0.12891,0.13279,0.13504,0.13191,0.12534,0.124,0.12821,0.13616,0.13474,0.13729,0.13681,0.13581,0.13182,0.13233,0.46472,0.40636,0.26379,0.27617,0.2515,0.32103,0.30969,0.28901,0.34498,0.33133,0.12919,0.13182,0.13233,0.13423,0.13363,0.13479,0.13762,0.1323,0.13859,0.13719,0.12389,0.1401,0.12453,0.13055,0.12764,0.45575,0.46417,0.4788,0.33677,0.33094,0.26207,0.25701,0.27057,0.30887,0.27021,0.25229,0.36564,0.12918,0.13585,0.13795,0.13092,0.13503,0.13127,0.13124,0.13691,0.13352,0.13695,0.1267,0.12413,0.13682,0.13115,0.12856,0.14133,0.415,0.46449,0.54904,0.48186,0.35111,0.28909,0.34469,0.2987,0.29788,0.29843,0.32905,0.2871,0.29025,0.26778,0.1382,0.12813,0.13799,0.1439,0.13432,0.13179,0.13476,0.13144,0.1381,0.13494,0.12597,0.13534,0.13616,0.129,0.14119,0.13663,0.45539,0.40156,0.4825,0.50342,0.45437,0.34008,0.27715,0.26941,0.32667,0.35231,0.29206,0.2875,0.26657,0.26312,0.33631,0.31341,0.13093,0.13662,0.13468,0.13165,0.13718,0.12854,0.14118,0.13559,0.13959,0.12921,0.13706,0.13578,0.14572,0.12639,0.13462,0.12859,0.12639,0.43159,0.43524,0.54638,0.59368,0.45105,0.33946,0.26958,0.32446,0.30423,0.3021,0.31228,0.24517,0.31237,0.29452,0.32694,0.38031,0.32025,0.13433,0.13861,0.13357,0.13502,0.13419,0.12262,0.1413,0.13617,0.13455,0.12946,0.13482,0.13654,0.13739,0.11203,0.11825,0.10875,0.13452,0.45604,0.46477,0.5023,0.52019,0.45089,0.50661,0.46827,0.31492,0.40115,0.31596,0.33135,0.29523,0.34578,0.26385,0.29678,0.33663,0.26683,0.25857,0.13211,0.12149,0.13786,0.14225,0.13734,0.13536,0.12751,0.12069,0.1358,0.13312,0.13442,0.10707,0.10458,0.10693,0.12043,0.10982,0.096185,0.13562,0.46721,0.51239,0.56432,0.44601,0.59005,0.60478,0.43128,0.29564,0.33182,0.3372,0.34678,0.27685,0.38215,0.28286,0.32421,0.301,0.24057,0.31149,0.1269,0.13251,0.13583,0.13116,0.13435,0.13248,0.13937,0.13604,0.13384,0.1004,0.10168,0.1126,0.11453,0.10688,0.1179,0.11612,0.11422,0.1127,0.12552,0.48608,0.50262,0.36663,0.5441,0.40255,0.37621,0.59226,0.34305,0.30972,0.26285,0.28154,0.32635,0.33281,0.28692,0.31184,0.30102,0.2844,0.31995,0.33159,0.13813,0.13469,0.13752,0.1325,0.13886,0.12723,0.10588,0.111,0.1048,0.1075,0.1082,0.10513,0.11424,0.11818,0.1113,0.10442,0.11861,0.10832,0.49495,0.4889,0.58678,0.38681,0.49047,0.47376,0.50373,0.33462,0.24785,0.26469,0.29047,0.30964,0.28536,0.36705,0.27519,0.38491,0.32959,0.29875,0.29266,0.13112,0.13267,0.13335,0.11553,0.11291,0.10035,0.11663,0.11158,0.11418,0.11076,0.11838,0.11335,0.11445,0.10991,0.1057,0.1170

8, 0.10446, 0.10277, 0.55104, 0.47786, 0.50505, 0.39801, 0.48989, 0.63702, 0.45  
661, 0.55142, 0.51754, 0.28291, 0.29723, 0.2895, 0.31708, 0.29192, 0.32661, 0.2  
8771, 0.26957, 0.30326, 0.2649, 0.32524, 0.10349, 0.10848, 0.10618, 0.10976, 0.  
10882, 0.10483, 0.10355, 0.12385, 0.11251, 0.10343, 0.10795, 0.11644, 0.10997,  
0.10798, 0.11075, 0.11785, 0.11698, 0.106, 0.47465, 0.45356, 0.51715, 0.51234,  
0.55056, 0.48451, 0.531, 0.56197, 0.56745, 0.31193, 0.29392, 0.241, 0.23413, 0.  
25879, 0.22733, 0.23216, 0.20966, 0.20559, 0.24134, 0.24165, 0.10398, 0.10973,  
0.10894, 0.10423, 0.099442, 0.097472, 0.10652, 0.11141, 0.1145, 0.11414, 0.108  
47, 0.10883, 0.11782, 0.11426, 0.11628, 0.10542, 0.1012, 0.10359, 0.47558, 0.46  
43, 0.5153, 0.41895, 0.48841, 0.48752, 0.30286, 0.42461, 0.49582, 0.30232, 0.24  
98, 0.19485, 0.244, 0.16106, 0.25711, 0.18159, 0.27999, 0.23897, 0.24408, 0.233  
15, 0.10417, 0.11468, 0.1145, 0.10493, 0.11024, 0.11833, 0.1167, 0.10926, 0.107  
93, 0.11325, 0.10778, 0.10999, 0.11499, 0.1127, 0.11317, 0.098664, 0.11584, 0.1  
1486, 0.42691, 0.45216, 0.53524, 0.5008, 0.46181, 0.50035, 0.46703, 0.2625, 0.3  
6813, 0.27055, 0.24589, 0.19416, 0.19995, 0.19355, 0.19609, 0.22052, 0.23083, 0  
.21394, 0.24749, 0.23066, 0.11682, 0.11287, 0.10813, 0.10579, 0.11502, 0.10122  
, 0.10959, 0.10052, 0.11117, 0.10883, 0.10048, 0.10933, 0.10991, 0.10388, 0.120  
87, 0.10803, 0.12021, 0.10415, 0.45894, 0.50209, 0.53551, 0.39473, 0.5527, 0.54  
688, 0.27224, 0.30931, 0.24431, 0.22575, 0.25475, 0.29305, 0.19153, 0.23801, 0.  
23363, 0.22027, 0.24885, 0.24488, 0.20391, 0.2336, 0.1097, 0.11742, 0.11044, 0.  
10724, 0.11714, 0.11409, 0.10717, 0.10957, 0.1096, 0.11344, 0.10979, 0.10424, 0  
.11105, 0.10961, 0.11, 0.11482, 0.10615, 0.1068, 0.47539, 0.51689, 0.57773, 0.5  
0525, 0.42062, 0.28634, 0.25894, 0.26816, 0.27569, 0.30457, 0.31557, 0.23266, 0  
.24333, 0.25653, 0.20487, 0.24433, 0.23572, 0.19697, 0.23741, 0.21874, 0.11293  
, 0.10514, 0.099546, 0.10523, 0.10019, 0.11488, 0.11429, 0.10597, 0.10674, 0.09  
9212, 0.10466, 0.11566, 0.10678, 0.10957, 0.11021, 0.098117, 0.091372, 0.10799  
, 0.47829, 0.4489, 0.46884, 0.30138, 0.32236, 0.31569, 0.32137, 0.3137, 0.32741  
, 0.20258, 0.32427, 0.27066, 0.24459, 0.2053, 0.24544, 0.25837, 0.21548, 0.1974  
1, 0.21344, 0.27063, 0.10503, 0.11605, 0.10637, 0.11185, 0.10887, 0.11851, 0.10  
878, 0.11855, 0.10526, 0.10126, 0.11217, 0.11883, 0.10795, 0.11877, 0.10246, 0.  
11067, 0.11692, 0.11614, 0.46456, 0.27184, 0.39655, 0.26524, 0.28907, 0.29096,  
0.29593, 0.30113, 0.27168, 0.25407, 0.24792, 0.17224, 0.23605, 0.20953, 0.2141  
2, 0.23476, 0.18296, 0.27469, 0.23709, 0.10522, 0.10932, 0.12229, 0.11357, 0.11  
293, 0.11275, 0.11212, 0.11041, 0.11661, 0.10858, 0.11266, 0.10837, 0.10699, 0.  
11109, 0.11901, 0.11147, 0.1056, 0.083999, 0.31704, 0.25256, 0.3522, 0.26006, 0  
.25673, 0.29904, 0.30116, 0.27076, 0.29026, 0.3042, 0.23109, 0.25788, 0.23597,  
0.25862, 0.14162, 0.22641, 0.23549, 0.23384, 0.20298, 0.11231, 0.11593, 0.1158  
5, 0.10928, 0.11013, 0.10845, 0.10383, 0.101, 0.10928, 0.10446, 0.11018, 0.1135  
, 0.1236, 0.11665, 0.11659, 0.11108, 0.11825, 0.087093, 0.26567, 0.28903, 0.210  
95, 0.27535, 0.25323, 0.26195, 0.36985, 0.26131, 0.28565, 0.30789, 0.25988, 0.2  
4121, 0.20747, 0.26412, 0.26575, 0.22483, 0.18851, 0.1931, 0.12166, 0.096621, 0  
.10844, 0.11798, 0.10252, 0.10883, 0.11778, 0.11152, 0.12199, 0.11295, 0.11921  
, 0.11166, 0.097173, 0.12058, 0.10914, 0.11021, 0.10521, 0.10965, 0.097293, 0.2  
7306, 0.33172, 0.26212, 0.29561, 0.30867, 0.3416, 0.27443, 0.21875, 0.26556, 0.  
25473, 0.24616, 0.24056, 0.22327, 0.21744, 0.23984, 0.3061, 0.22952, 0.19313, 0  
.10004, 0.11065, 0.099721, 0.09915, 0.11423, 0.11882, 0.11167, 0.11697, 0.1213  
7, 0.11307, 0.11544, 0.11314, 0.11292, 0.10437, 0.11644, 0.10719, 0.11959, 0.09  
5422, 0.085078, 0.079958, 0.20618, 0.28748, 0.23543, 0.24278, 0.28809, 0.30251  
, 0.24863, 0.26569, 0.34292, 0.19452, 0.23081, 0.19047, 0.22314, 0.26931, 0.214  
42, 0.11224, 0.10207, 0.10366, 0.10734, 0.1091, 0.11902, 0.11034, 0.10802, 0.10  
274, 0.12359, 0.0967, 0.11555, 0.10414, 0.11017, 0.10621, 0.11126, 0.11696, 0.1  
1299, 0.077727, 0.093608, 0.088807, 0.090145, 0.23635, 0.28228, 0.24834, 0.270

82,0.36618,0.39203,0.24507,0.30302,0.31117,0.247,0.26159,0.24518,0.111  
52,0.1121,0.10823,0.10558,0.10772,0.10182,0.11787,0.11285,0.10613,0.09  
8443,0.10784,0.10283,0.11651,0.11274,0.10323,0.10708,0.10728,0.11481,0  
.099809,0.11443,0.090694,0.086707,0.088069,0.097186,0.077956,0.088196,  
0.28988,0.32781,0.31642,0.2678,0.24185,0.28999,0.29837,0.35957,0.11797  
,0.11139,0.1108,0.11171,0.10414,0.10303,0.096025,0.10633,0.1046,0.1136  
6,0.11018,0.10572,0.11166,0.11463,0.11059,0.10667,0.10455,0.11113,0.10  
094,0.10481,0.11132,0.10749,0.11405,0.093084,0.097349,0.080902,0.07074  
2,0.095581,0.086063,0.24332,0.27984,0.22476,0.28281,0.30688,0.080573,0  
.089855,0.11612,0.11457,0.10747,0.10591,0.10735,0.11584,0.10944,0.1063  
5,0.11071,0.11268,0.12449,0.10768,0.10728,0.10819,0.10613,0.10532,0.11  
65,0.1105,0.11186,0.10656,0.10947,0.088585,0.089785,0.095896,0.084364,  
0.087158,0.08622,0.078818,0.082714,0.085904,0.072453,0.26889,0.28354,0  
.099507,0.095586,0.080847,0.08209,0.10922,0.11484,0.10551,0.10465,0.10  
1,0.10686,0.11425,0.10738,0.10635,0.099257,0.1031,0.11505,0.10837,0.11  
178,0.11175,0.11701,0.10794,0.10574,0.11182,0.093716,0.07841,0.090155,  
0.084083,0.078623,0.086347,0.085496,0.07884,0.097226,0.078015,0.090843  
,0.087724,0.078504,0.085444,0.087227,0.08297,0.085744,0.10958,0.094653  
,0.11106,0.10809,0.11013,0.10867,0.12129,0.1056,0.10245,0.12084,0.1108  
4,0.11383,0.10948,0.11144,0.11496,0.11465,0.093105,0.085615,0.087594,0  
.089481,0.081759,0.097613,0.089607,0.086538,0.092459,0.089253,0.09484,  
0.088069,0.083478,0.085016,0.093462,0.088917,0.08007,0.087109,0.083192  
,0.10345,0.11287,0.10712,0.11018,0.10397,0.10471,0.10749,0.10846,0.105  
22,0.099408,0.11525,0.11042,0.10981,0.083212,0.077924,0.08566,0.084677  
,0.083364,0.084121,0.095476,0.096065,0.078418,0.079894,0.082357,0.0877  
15,0.082889,0.094911,0.088179,0.083774,0.098336,0.089291,0.084431,0.08  
3183,0.092539,0.10733,0.10743,0.11604,0.11532,0.10413,0.11177,0.11147,  
0.10186,0.10513,0.097899,0.086772,0.097392,0.082659,0.097268,0.086902,  
0.095534,0.092377,0.088756,0.089959,0.088503,0.093543,0.090798,0.07963  
2,0.082064,0.08736,0.077002,0.085786,0.095443,0.090854,0.067509,0.1001  
5,0.087051,0.090225,0.087067,0.11313,0.11987,0.10942,0.11642,0.076032,  
0.084077,0.090387,0.087508,0.085106,0.080704,0.077701,0.085371,0.07951  
4,0.092103,0.079997,0.092792,0.081877,0.086846,0.079182,0.10115,0.0939  
6,0.079932,0.080538,0.076105,0.08956,0.083268,0.075324,0.081578,0.0919  
76,0.090996,0.088782,0.089399,0.090949,0.08901,0.089349,0.079439,0.098  
553,0.084165,0.082509,0.088744,0.087352,0.080378,0.078457,0.086032,0.0  
92921,0.096616,0.09109,0.083133,0.092325,0.076226,0.089032,0.084319,0.  
083706,0.083485,0.086662,0.084175,0.099001,0.087934,0.084709,0.078223,  
0.086331,0.087431,0.087975,0.0818,0.089325,0.089918,0.081642,0.092538,  
0.083248,0.081892,0.094682,0.090322,0.082441,0.087991,0.077767,0.09225  
2,0.080327,0.078811,0.091278,0.082495,0.083176,0.072707,0.082002,0.090  
17,0.08707,0.084621,0.080792,0.08074,0.080994,0.085551,0.092361,0.0831  
59,0.087564,0.073434,0.078503,0.078931,0.0897,0.09479,0.091955,0.08388  
8,0.077238,0.096145,0.087901,0.07978,0.088219,0.097932,0.086631,0.0829  
01,0.093665,0.084241,0.078254,0.088637,0.089035,0.089706,0.088806,0.09  
3598,0.090445,0.092304,0.08255,0.090271,0.08093,0.081494,0.083742,0.08  
6275,0.087495,0.088364,0.089401,0.081155,0.087939,0.077177,0.089077,0.  
084569,0.085323,0.090208,0.087275,0.08013,0.081891,0.085519,0.095321,0  
.086098,0.086921,0.075733,0.081916,0.098438,0.082126,0.098909,0.095246  
,0.092578,0.088603,0.083831,0.086609,0.085385,0.084573,0.075941,0.0866  
94,0.091998,0.097188,0.081502,0.078482,0.085183,0.089557,0.07178,0.088  
169,0.076263,0.095621,0.091637,0.092524,0.086217,0.09052,0.094174,0.09

1155,0.089705,0.092789,0.09812,0.088285,0.088095,0.086454,0.096947,0.088365,0.083028,0.090326,0.093112,0.085903,0.075602,0.09211,0.084302,0.093945,0.079861,0.080544,0.076985,0.089375,0.083355,0.086103,0.074685,0.083662,0.084137,0.086168,0.089043,0.082866  
0.11997,0.12824,0.11848,0.11743,0.11642,0.11915,0.11485,0.11664,0.134,0.11822,0.13423,0.12248,0.11873,0.11706,0.11907,0.12113,0.12099,0.11933,0.12092,0.11497,0.32184,0.31008,0.30488,0.30362,0.11368,0.12116,0.11301,0.12207,0.11939,0.1171,0.11744,0.1246,0.11415,0.11561,0.12227,0.12064,0.11643,0.12525,0.10608,0.41471,0.23119,0.26359,0.19997,0.29921,0.23662,0.26182,0.11461,0.1209,0.11663,0.12256,0.1191,0.11494,0.11185,0.1181,0.12842,0.12382,0.12861,0.12303,0.12274,0.11918,0.11831,0.43282,0.34291,0.24077,0.25813,0.21012,0.31447,0.29066,0.24902,0.2998,0.3161,0.11944,0.11849,0.12234,0.12047,0.12091,0.12518,0.12436,0.11857,0.12399,0.12499,0.11332,0.12646,0.11679,0.12116,0.11548,0.43886,0.436,0.47242,0.29891,0.30691,0.24468,0.22211,0.23476,0.29908,0.24739,0.23783,0.31986,0.11397,0.12097,0.12781,0.11743,0.12257,0.1151,0.11773,0.12031,0.121,0.12285,0.11668,0.11165,0.12397,0.12095,0.11975,0.12735,0.39949,0.48568,0.53532,0.39959,0.34362,0.2618,0.31565,0.28453,0.2428,0.2548,0.28098,0.24606,0.26154,0.24552,0.12724,0.11379,0.12634,0.13092,0.12188,0.12126,0.11999,0.11778,0.12655,0.12007,0.11097,0.12351,0.12217,0.11329,0.12866,0.12256,0.38674,0.34201,0.41876,0.45797,0.43947,0.35461,0.2425,0.24972,0.27919,0.32961,0.2462,0.25364,0.23304,0.22856,0.31754,0.28587,0.12153,0.12687,0.12395,0.11964,0.12297,0.11951,0.12926,0.12352,0.12697,0.11543,0.12195,0.12353,0.13558,0.10957,0.11901,0.11572,0.11391,0.37972,0.35336,0.50784,0.57732,0.40428,0.27036,0.23366,0.28961,0.28267,0.28231,0.30731,0.22204,0.28124,0.26572,0.32927,0.36088,0.28083,0.123,0.12569,0.12282,0.12256,0.12216,0.11278,0.12527,0.12681,0.1225,0.11919,0.12258,0.12086,0.11912,0.096039,0.10283,0.095849,0.12096,0.38663,0.44636,0.47102,0.52147,0.41053,0.48193,0.37481,0.28579,0.35211,0.30427,0.32109,0.27614,0.31847,0.24057,0.28288,0.31934,0.26138,0.22117,0.12165,0.10862,0.12553,0.12757,0.12237,0.12425,0.11715,0.11188,0.12235,0.11827,0.11832,0.095965,0.096189,0.0946,0.10806,0.098326,0.085173,0.12277,0.4238,0.47284,0.52908,0.46751,0.54051,0.5537,0.36857,0.26979,0.29381,0.2969,0.33727,0.2542,0.34675,0.25611,0.30518,0.27283,0.21024,0.29171,0.11577,0.12216,0.12079,0.11532,0.12273,0.12176,0.12364,0.12087,0.12008,0.087266,0.091188,0.10123,0.10138,0.092556,0.10543,0.10236,0.10289,0.099966,0.11277,0.41481,0.46668,0.29511,0.50504,0.3523,0.3252,0.55686,0.32058,0.29555,0.23349,0.24237,0.28193,0.32561,0.23121,0.27257,0.28809,0.26529,0.28813,0.28515,0.12406,0.12158,0.12518,0.1209,0.12381,0.1156,0.090936,0.10107,0.093484,0.097494,0.094214,0.09377,0.10304,0.10784,0.095989,0.090342,0.10457,0.097552,0.44247,0.43406,0.58108,0.34799,0.45432,0.41949,0.44451,0.3005,0.24736,0.24437,0.2808,0.29376,0.2789,0.32557,0.23331,0.35648,0.29556,0.28411,0.26177,0.12155,0.11921,0.11926,0.10479,0.099558,0.088473,0.10456,0.10063,0.10291,0.10037,0.10471,0.10361,0.10244,0.095624,0.095327,0.10521,0.096148,0.09532,0.52125,0.43223,0.51385,0.40271,0.42729,0.5653,0.39436,0.48164,0.4895,0.24941,0.27557,0.26496,0.27574,0.25961,0.28576,0.26962,0.25689,0.28085,0.24521,0.27292,0.09357,0.096783,0.093501,0.097972,0.097647,0.092523,0.097838,0.11134,0.10154,0.09275,0.09588,0.1066,0.10096,0.097608,0.096122,0.10631,0.10454,0.095394,0.44079,0.41041,0.46767,0.47465,0.50101,0.42365,0.48543,0.5365,0.55966,0.28055,0.28677,0.21526,0.20071,0.24094,0.21767,0.1952,0.20363,0.18935,0.21423,0.23172,0.090481,0.10086,0.091861,0.096097,0.088

742,0.085184,0.095485,0.10084,0.10402,0.10168,0.095284,0.097101,0.1059  
2,0.10513,0.10415,0.092556,0.096894,0.089596,0.4113,0.45225,0.47596,0.  
43073,0.45374,0.44834,0.27194,0.39369,0.43225,0.28156,0.23964,0.16922,  
0.21511,0.16043,0.2365,0.16306,0.25138,0.20503,0.22719,0.22919,0.09131  
6,0.10425,0.10313,0.093829,0.10043,0.10313,0.10366,0.096553,0.094965,0  
.099038,0.095704,0.095072,0.10556,0.096802,0.10394,0.09313,0.1021,0.10  
737,0.41162,0.37394,0.50604,0.45755,0.41754,0.43054,0.44219,0.24255,0.  
33436,0.25683,0.21741,0.18152,0.17395,0.18244,0.18082,0.19429,0.19983,  
0.16829,0.24045,0.19384,0.10267,0.10562,0.099094,0.094085,0.10243,0.09  
0184,0.096263,0.088795,0.0972,0.094119,0.088692,0.099919,0.099102,0.09  
2263,0.10584,0.09176,0.10971,0.09166,0.44118,0.46562,0.50287,0.36631,0  
.49665,0.51704,0.22914,0.2828,0.22849,0.21274,0.22589,0.25606,0.15031,  
0.22801,0.19723,0.21402,0.24063,0.21857,0.18399,0.21078,0.094359,0.101  
38,0.10024,0.093068,0.10669,0.1027,0.096206,0.096773,0.098774,0.10239,  
0.10035,0.099146,0.099447,0.099024,0.10274,0.099255,0.092297,0.093934,  
0.40998,0.47948,0.52088,0.48933,0.34357,0.25961,0.24319,0.25142,0.2243  
5,0.30506,0.29247,0.20635,0.2293,0.24741,0.18726,0.22563,0.21301,0.170  
46,0.21959,0.20661,0.099681,0.093841,0.086494,0.098484,0.084254,0.1041  
1,0.099635,0.091592,0.097973,0.087821,0.092342,0.10567,0.096475,0.0986  
61,0.098565,0.08993,0.080757,0.098191,0.46234,0.40975,0.42407,0.27785,  
0.31065,0.2678,0.28198,0.28777,0.29085,0.19018,0.28268,0.23648,0.24379  
,0.19296,0.21599,0.23172,0.18823,0.17573,0.1975,0.24361,0.096186,0.104  
23,0.094322,0.10038,0.096856,0.10757,0.099651,0.10493,0.095721,0.09277  
5,0.10004,0.10757,0.096442,0.10483,0.09034,0.095631,0.10481,0.10024,0.  
40362,0.26638,0.34904,0.24009,0.27378,0.26056,0.27434,0.2966,0.24851,0  
.21669,0.22635,0.15841,0.223,0.19408,0.18425,0.22043,0.17725,0.26246,0  
.23822,0.089756,0.099959,0.11043,0.1025,0.099471,0.10073,0.10146,0.098  
46,0.10479,0.097313,0.10028,0.095291,0.094432,0.097513,0.1093,0.10095,  
0.099362,0.076052,0.28208,0.22697,0.30329,0.21411,0.21354,0.28104,0.27  
367,0.25472,0.2533,0.27915,0.21272,0.23795,0.22524,0.23582,0.13314,0.2  
0873,0.20217,0.20412,0.19353,0.104,0.1005,0.10304,0.09655,0.097807,0.0  
97588,0.089361,0.087519,0.10238,0.09243,0.098169,0.10061,0.10943,0.103  
76,0.10865,0.10163,0.10377,0.07811,0.23954,0.26086,0.20653,0.26838,0.2  
2957,0.24682,0.38339,0.2538,0.26227,0.30427,0.2293,0.23245,0.19904,0.2  
2416,0.22781,0.20325,0.17533,0.17543,0.10884,0.087496,0.097283,0.10459  
,0.089445,0.097127,0.10159,0.097752,0.11143,0.09985,0.1059,0.1025,0.08  
8445,0.10897,0.099297,0.095448,0.094774,0.093105,0.088874,0.26788,0.28  
533,0.24005,0.26311,0.2789,0.31825,0.23032,0.17708,0.24122,0.24838,0.2  
3318,0.22393,0.19212,0.20125,0.20146,0.27831,0.19374,0.17667,0.088951,  
0.095642,0.091936,0.09186,0.10018,0.10628,0.096609,0.10236,0.11182,0.1  
0098,0.10298,0.099208,0.10051,0.095332,0.10628,0.096797,0.10456,0.0847  
04,0.074175,0.06897,0.188,0.23928,0.2282,0.20262,0.26802,0.27885,0.219  
82,0.23201,0.32521,0.1602,0.1947,0.16024,0.20549,0.24552,0.20378,0.097  
449,0.093463,0.094362,0.09572,0.09738,0.10568,0.10056,0.094822,0.09252  
4,0.10844,0.086123,0.10168,0.090079,0.094792,0.094098,0.099882,0.10383  
,0.10345,0.071405,0.083172,0.075461,0.079443,0.22574,0.2971,0.23111,0.  
23806,0.32784,0.37232,0.23597,0.25899,0.28626,0.2356,0.25849,0.21557,0  
.10033,0.10254,0.099046,0.089732,0.09582,0.092647,0.10429,0.098788,0.0  
91223,0.090742,0.092317,0.092283,0.10466,0.10248,0.091981,0.097049,0.0  
91917,0.1054,0.085864,0.10021,0.077568,0.073587,0.075565,0.085693,0.07  
1053,0.083343,0.26784,0.29304,0.2874,0.26253,0.20612,0.27997,0.30265,0  
.33017,0.10678,0.098926,0.1005,0.10273,0.092485,0.094347,0.08978,0.095

206,0.08951,0.1025,0.10425,0.093461,0.098025,0.10111,0.10112,0.092804,  
0.093668,0.10194,0.090085,0.092611,0.099703,0.093856,0.09908,0.085335,  
0.078414,0.070393,0.063269,0.077032,0.074271,0.21383,0.27409,0.20484,0.  
.24696,0.27407,0.068332,0.078594,0.10178,0.10421,0.094328,0.097095,0.0  
97114,0.10387,0.097763,0.095471,0.09704,0.10127,0.11132,0.091965,0.097  
441,0.094676,0.095086,0.094247,0.10311,0.10035,0.10046,0.093649,0.0975  
67,0.076516,0.079681,0.081576,0.07208,0.078171,0.076832,0.07229,0.0713  
72,0.079033,0.057916,0.25779,0.26253,0.089791,0.079631,0.067065,0.0751  
7,0.1017,0.10281,0.093345,0.095476,0.085931,0.091478,0.10202,0.095771,  
0.096033,0.086826,0.093612,0.10173,0.096265,0.10033,0.10225,0.10829,0.  
095887,0.094361,0.098037,0.083201,0.069136,0.076801,0.075335,0.064876,  
0.074191,0.073386,0.068591,0.083982,0.064677,0.078629,0.079654,0.06848  
5,0.080478,0.076084,0.070142,0.075967,0.094143,0.085407,0.10126,0.0965  
98,0.10029,0.098002,0.10759,0.091772,0.091094,0.106,0.10021,0.10394,0.  
098847,0.10343,0.10252,0.10313,0.083457,0.078584,0.075471,0.08291,0.07  
4546,0.086051,0.072878,0.075767,0.07791,0.079471,0.082054,0.075259,0.0  
74942,0.076335,0.082445,0.076532,0.067879,0.077585,0.073176,0.092714,0  
.099283,0.094425,0.096529,0.09318,0.094466,0.096029,0.09842,0.096304,0  
.087485,0.10371,0.099384,0.097786,0.073646,0.064955,0.072073,0.073154,  
0.071561,0.076221,0.084674,0.080755,0.0716,0.069008,0.074793,0.078215,  
0.071542,0.08317,0.081469,0.07151,0.084475,0.082127,0.073943,0.074563,  
0.080392,0.097541,0.095445,0.10457,0.10066,0.093833,0.097569,0.098311,  
0.093037,0.097567,0.084124,0.071318,0.080886,0.076098,0.084592,0.07258  
4,0.086736,0.079869,0.076764,0.084079,0.076606,0.083848,0.075285,0.067  
523,0.069771,0.077213,0.066435,0.069731,0.084479,0.080436,0.061398,0.0  
8907,0.078464,0.079809,0.07928,0.10298,0.11016,0.098826,0.10699,0.0679  
38,0.072838,0.077443,0.072832,0.076456,0.068467,0.071434,0.076818,0.06  
9414,0.083321,0.067724,0.08094,0.069099,0.075162,0.073072,0.087027,0.0  
84268,0.073152,0.068213,0.061753,0.078993,0.068528,0.065827,0.069549,0  
.079442,0.081524,0.078037,0.077861,0.0776,0.081222,0.082756,0.073227,0  
.085449,0.07177,0.073302,0.076243,0.078265,0.068957,0.066446,0.0774,0.  
081073,0.081072,0.080552,0.074435,0.082689,0.065036,0.080979,0.076765,  
0.07284,0.069632,0.078,0.075959,0.085363,0.079443,0.072415,0.07242,0.0  
78597,0.076822,0.074976,0.072601,0.07914,0.073873,0.069074,0.083898,0.  
070091,0.070881,0.081855,0.075367,0.069186,0.076999,0.072012,0.080018,  
0.069203,0.071279,0.081236,0.07231,0.07141,0.057783,0.067064,0.0803,0.  
07233,0.073296,0.07062,0.064453,0.071143,0.070477,0.083707,0.072254,0.  
073888,0.064253,0.068677,0.068157,0.079709,0.082729,0.075591,0.068639,  
0.070164,0.083986,0.078956,0.071734,0.078289,0.083482,0.07478,0.073079  
,0.083791,0.069024,0.069942,0.083139,0.077552,0.075867,0.078366,0.0784  
39,0.077938,0.078063,0.069557,0.08229,0.07036,0.073749,0.070292,0.0759  
78,0.07814,0.075326,0.081462,0.070141,0.075061,0.064965,0.07773,0.0723  
65,0.07405,0.079685,0.075572,0.071736,0.071721,0.074004,0.083274,0.072  
303,0.073399,0.065848,0.070696,0.090064,0.072182,0.084558,0.085158,0.0  
79254,0.07801,0.073872,0.077428,0.075226,0.07032,0.072399,0.078915,0.0  
81403,0.082329,0.068752,0.067793,0.074496,0.079011,0.05944,0.07735,0.0  
68332,0.082095,0.080112,0.081024,0.074294,0.079546,0.080474,0.081508,0  
.083602,0.082386,0.083002,0.076739,0.075869,0.076881,0.085881,0.080825  
,0.069112,0.075117,0.082036,0.073515,0.067602,0.078882,0.071698,0.0804  
72,0.070635,0.068176,0.064085,0.076667,0.075548,0.071984,0.06422,0.073  
455,0.07574,0.074918,0.080658,0.067827

0.10911,0.11951,0.10853,0.10686,0.10086,0.1068,0.10004,0.10159,0.12318  
,0.10982,0.12393,0.11344,0.10879,0.10674,0.11048,0.11264,0.11011,0.111  
03,0.11383,0.10518,0.27954,0.27256,0.29454,0.27937,0.10212,0.11433,0.1  
0346,0.11016,0.11099,0.10774,0.10667,0.11442,0.10443,0.10389,0.11086,0  
.10896,0.107,0.11677,0.095185,0.40984,0.21149,0.26083,0.17772,0.25934,  
0.21586,0.24514,0.10327,0.10797,0.10678,0.1123,0.10872,0.10497,0.10318  
,0.1069,0.11589,0.11283,0.12106,0.10874,0.11177,0.11031,0.10818,0.4095  
2,0.3172,0.24685,0.26411,0.19423,0.26549,0.27034,0.23598,0.27033,0.306  
64,0.11453,0.11248,0.10956,0.11055,0.1127,0.11525,0.10964,0.10566,0.11  
379,0.11552,0.10248,0.11747,0.10793,0.10974,0.10433,0.42683,0.40031,0.  
45522,0.27634,0.25397,0.2249,0.19869,0.21452,0.29043,0.23901,0.20645,0  
.2883,0.10376,0.11224,0.11345,0.10813,0.11203,0.1058,0.10951,0.10963,0  
.10921,0.10958,0.10825,0.10417,0.11242,0.11268,0.1043,0.11192,0.37633,  
0.43449,0.49643,0.39141,0.32583,0.24901,0.29525,0.26293,0.22668,0.2652  
5,0.25225,0.23494,0.24598,0.21656,0.1186,0.10505,0.1124,0.12205,0.1123  
4,0.11273,0.11099,0.1107,0.11359,0.10985,0.10252,0.11306,0.11229,0.103  
43,0.11696,0.11198,0.35146,0.32013,0.41728,0.46236,0.42653,0.36184,0.2  
2188,0.2563,0.25644,0.30231,0.20935,0.23202,0.22399,0.21152,0.28248,0.  
28903,0.11194,0.11572,0.11285,0.11072,0.11192,0.10854,0.11933,0.11126,  
0.11896,0.1041,0.10986,0.10883,0.12342,0.096886,0.1054,0.10526,0.10475  
,0.32081,0.30286,0.48475,0.54843,0.4078,0.21869,0.22042,0.26938,0.2509  
,0.2841,0.28589,0.22357,0.26138,0.24507,0.30536,0.34337,0.2416,0.11332  
,0.11529,0.11095,0.10831,0.11498,0.10052,0.11383,0.11542,0.11204,0.108  
12,0.1117,0.11096,0.10985,0.085865,0.095486,0.086537,0.10826,0.39173,0  
.42171,0.45453,0.49469,0.39819,0.4831,0.34279,0.25401,0.32312,0.2867,0  
.33272,0.28584,0.30721,0.22324,0.26563,0.30251,0.26272,0.20649,0.10992  
,0.097494,0.1142,0.1166,0.11345,0.11251,0.10712,0.10173,0.10904,0.1079  
8,0.10721,0.088664,0.087555,0.085524,0.103,0.087826,0.080062,0.11442,0  
.40879,0.42887,0.42641,0.41758,0.48381,0.536,0.34891,0.24264,0.26451,0  
.27457,0.33145,0.24178,0.33569,0.24985,0.26117,0.26443,0.19526,0.26311  
,0.10693,0.11316,0.10637,0.1066,0.11569,0.11253,0.10978,0.10919,0.1122  
9,0.081513,0.083034,0.094138,0.091673,0.08361,0.095243,0.094133,0.0934  
42,0.089754,0.10261,0.39757,0.45772,0.30241,0.45058,0.30046,0.28263,0.  
51654,0.27752,0.26224,0.21979,0.23245,0.27424,0.29212,0.23733,0.24481,  
0.27565,0.24778,0.26231,0.27823,0.11522,0.10941,0.11707,0.10811,0.1121  
9,0.10269,0.079074,0.093937,0.082167,0.087765,0.088878,0.083717,0.0881  
16,0.10347,0.085045,0.086228,0.096553,0.087818,0.44008,0.45221,0.5351,  
0.34813,0.45424,0.3885,0.41814,0.25856,0.21831,0.22287,0.26642,0.28778  
,0.25895,0.31239,0.22415,0.34156,0.28267,0.22127,0.25599,0.11214,0.105  
9,0.11018,0.095992,0.087115,0.079161,0.092484,0.092004,0.09707,0.09248  
7,0.096738,0.097061,0.094505,0.091441,0.08732,0.093446,0.086765,0.0873  
17,0.50297,0.47322,0.48448,0.36221,0.35079,0.49476,0.35903,0.44714,0.4  
4644,0.22207,0.26924,0.23427,0.26483,0.24986,0.27264,0.26421,0.24549,0  
.27672,0.23506,0.26671,0.082347,0.088942,0.083238,0.088,0.086993,0.081  
801,0.08941,0.10044,0.091208,0.085898,0.085063,0.097351,0.090739,0.086  
481,0.086021,0.095111,0.094815,0.087851,0.42452,0.36737,0.43134,0.4682  
6,0.48184,0.38269,0.46931,0.48469,0.50343,0.26456,0.28277,0.20625,0.17  
165,0.21931,0.20477,0.20537,0.20548,0.17142,0.20835,0.20823,0.08288,0.  
091712,0.086492,0.087728,0.084532,0.080345,0.088094,0.091987,0.09465,0  
.091129,0.084356,0.088999,0.096025,0.095302,0.089695,0.084634,0.087431  
,0.083079,0.36313,0.44014,0.45728,0.41938,0.39368,0.42829,0.30275,0.38  
041,0.42275,0.2458,0.22782,0.15452,0.20346,0.14278,0.22284,0.15578,0.2



3068,0.18402,0.21117,0.20543,0.081841,0.096637,0.095524,0.086013,0.091734,0.094767,0.094174,0.086501,0.085801,0.088819,0.089393,0.089065,0.094577,0.088387,0.096336,0.084956,0.089645,0.093116,0.39125,0.36449,0.44908,0.42914,0.40795,0.45118,0.42043,0.23174,0.34667,0.24504,0.19729,0.17233,0.16322,0.15303,0.16092,0.18573,0.19364,0.16345,0.22468,0.16741,0.091096,0.093033,0.089056,0.08495,0.090262,0.076496,0.088354,0.077099,0.08652,0.08703,0.07791,0.090515,0.084391,0.082179,0.095589,0.083345,0.10015,0.083508,0.41395,0.43049,0.46072,0.34736,0.44299,0.49222,0.22145,0.25553,0.20435,0.19894,0.20615,0.25297,0.1404,0.20632,0.18486,0.19125,0.20673,0.19845,0.17979,0.17747,0.084595,0.093056,0.090542,0.087588,0.097629,0.091396,0.088221,0.081495,0.09174,0.092539,0.089819,0.092386,0.088023,0.089607,0.095036,0.089176,0.083828,0.085957,0.40626,0.46194,0.50715,0.46034,0.3116,0.24858,0.24805,0.22082,0.1997,0.27913,0.26907,0.20703,0.20515,0.23371,0.1763,0.20581,0.19659,0.16323,0.20678,0.18912,0.091495,0.087008,0.074028,0.091105,0.075591,0.095981,0.088189,0.087047,0.089105,0.079001,0.084836,0.095472,0.085378,0.090302,0.088767,0.078697,0.069909,0.088401,0.41577,0.37102,0.39738,0.24213,0.28085,0.23833,0.24731,0.28818,0.29078,0.20435,0.2578,0.20963,0.21818,0.17312,0.20822,0.22292,0.18221,0.153,0.1884,0.23839,0.08299,0.093408,0.085756,0.089451,0.090247,0.10151,0.090237,0.094861,0.084765,0.084006,0.088793,0.097648,0.090139,0.094725,0.084096,0.088857,0.095126,0.094765,0.3791,0.22468,0.32424,0.24588,0.24292,0.25606,0.23665,0.27851,0.23012,0.19007,0.21688,0.15306,0.19686,0.17508,0.16493,0.19825,0.15298,0.24076,0.22126,0.078543,0.09054,0.099817,0.091127,0.090128,0.087455,0.092097,0.088543,0.095904,0.089508,0.088321,0.082413,0.083635,0.091842,0.10066,0.092401,0.08941,0.069551,0.25787,0.2167,0.28462,0.21324,0.19131,0.28337,0.25445,0.22417,0.22216,0.26964,0.19413,0.20945,0.20771,0.21293,0.13726,0.18061,0.18367,0.18298,0.18189,0.092521,0.089625,0.092117,0.08936,0.089904,0.092191,0.082505,0.07931,0.092057,0.086036,0.089019,0.092111,0.10213,0.089157,0.098516,0.090883,0.090946,0.069709,0.21803,0.23857,0.20885,0.2586,0.22613,0.21231,0.36408,0.2328,0.24841,0.26043,0.20623,0.20672,0.21552,0.21293,0.21006,0.18974,0.1694,0.15422,0.10057,0.07821,0.090745,0.092226,0.081135,0.092114,0.089356,0.090148,0.10158,0.089383,0.10265,0.097498,0.079344,0.097539,0.088816,0.086525,0.080632,0.080431,0.078521,0.26939,0.25653,0.22965,0.22499,0.27386,0.29653,0.19373,0.17546,0.21755,0.24297,0.21675,0.19889,0.18379,0.19356,0.18555,0.25875,0.17757,0.17069,0.077329,0.087973,0.0816,0.082127,0.092157,0.094217,0.087999,0.094938,0.10004,0.090739,0.09512,0.087729,0.091838,0.085641,0.099121,0.091483,0.091902,0.073218,0.066573,0.062825,0.17284,0.21436,0.19367,0.17847,0.23896,0.24478,0.22094,0.21467,0.28741,0.13962,0.18134,0.1477,0.18909,0.23317,0.17294,0.088987,0.083446,0.084272,0.088188,0.086887,0.09547,0.090834,0.086196,0.082017,0.1016,0.076105,0.092967,0.080455,0.088941,0.083834,0.091033,0.094619,0.093446,0.064523,0.073209,0.064779,0.069811,0.22073,0.30099,0.21742,0.2066,0.3156,0.34749,0.21128,0.25173,0.25586,0.20805,0.23263,0.1899,0.08858,0.093294,0.09115,0.080248,0.086125,0.084535,0.094905,0.088912,0.084771,0.080268,0.084585,0.0826,0.091438,0.095828,0.083088,0.091103,0.085704,0.09518,0.076772,0.094357,0.073661,0.063626,0.065283,0.076604,0.056123,0.072089,0.24198,0.26873,0.27627,0.23615,0.1805,0.25998,0.30507,0.33357,0.10051,0.084928,0.090483,0.094275,0.08497,0.084097,0.082978,0.085226,0.083165,0.088005,0.09511,0.083895,0.090381,0.090516,0.089993,0.083724,0.085031,0.091417,0.081512,0.084457,0.088413,0.086631,0.090268,0.077506,0.067179,0.06144,

0.056494,0.073382,0.067802,0.18407,0.23861,0.18647,0.22264,0.23626,0.0  
61929,0.071772,0.096041,0.095815,0.085287,0.088332,0.088969,0.092442,0  
.086987,0.083734,0.08943,0.092481,0.10423,0.086158,0.0843,0.084932,0.0  
894,0.087061,0.096531,0.087825,0.095108,0.083548,0.086496,0.072495,0.0  
68032,0.072106,0.061758,0.069745,0.071076,0.065601,0.058154,0.070503,0  
.055478,0.26093,0.2279,0.080812,0.075276,0.060222,0.067957,0.093852,0.  
088784,0.086637,0.087556,0.076753,0.081788,0.090034,0.084815,0.083226,  
0.082022,0.091614,0.095442,0.0892,0.087153,0.092494,0.098783,0.088672,  
0.084772,0.090705,0.073846,0.063314,0.066509,0.066735,0.055349,0.06912  
2,0.066244,0.063033,0.084317,0.060943,0.070993,0.069561,0.061602,0.073  
839,0.071131,0.061294,0.068526,0.087161,0.079311,0.090505,0.086516,0.0  
92046,0.086827,0.097002,0.081503,0.084248,0.10013,0.094499,0.096501,0.  
090212,0.092018,0.092444,0.093643,0.07251,0.071139,0.069484,0.07431,0.  
068236,0.077218,0.06903,0.068003,0.071559,0.071293,0.0756,0.067007,0.0  
69785,0.068752,0.075091,0.069348,0.060323,0.062588,0.069536,0.080039,0  
.090193,0.084376,0.088403,0.086639,0.085586,0.089582,0.089647,0.090332  
,0.080063,0.09107,0.086583,0.087667,0.065492,0.057407,0.064802,0.06813  
3,0.064713,0.069127,0.075067,0.07258,0.063375,0.060866,0.070583,0.0807  
94,0.069698,0.074589,0.070318,0.067748,0.077268,0.071611,0.065891,0.07  
4492,0.075389,0.08348,0.090372,0.093744,0.092663,0.085192,0.087244,0.0  
89435,0.085554,0.087081,0.077695,0.071399,0.076012,0.067544,0.077319,0  
.065888,0.077499,0.067194,0.068747,0.075376,0.063536,0.084523,0.067329  
,0.065212,0.066419,0.071076,0.055986,0.064097,0.075492,0.072797,0.0561  
5,0.079637,0.070498,0.069291,0.068776,0.094445,0.10004,0.090123,0.1008  
9,0.064694,0.063728,0.068549,0.064458,0.070693,0.063693,0.063886,0.065  
626,0.060912,0.073434,0.06065,0.077013,0.063596,0.072574,0.063529,0.07  
7911,0.078126,0.066693,0.061021,0.058542,0.066694,0.062773,0.063213,0.  
062547,0.072563,0.07326,0.071683,0.069321,0.070586,0.075331,0.072812,0  
.066808,0.074526,0.070526,0.066026,0.068541,0.071407,0.061409,0.059272  
,0.069054,0.072146,0.074245,0.073112,0.067286,0.07377,0.059173,0.07518  
9,0.063223,0.063966,0.060995,0.075968,0.069015,0.079119,0.072422,0.064  
379,0.06746,0.06788,0.070482,0.071435,0.06673,0.066063,0.068946,0.0635  
57,0.075475,0.063102,0.063991,0.076342,0.067363,0.061722,0.07421,0.063  
975,0.071526,0.064749,0.063107,0.073397,0.065273,0.067938,0.051534,0.0  
6237,0.076147,0.066691,0.067431,0.061212,0.059718,0.06312,0.068665,0.0  
75852,0.066076,0.065759,0.058683,0.06352,0.065728,0.073608,0.074411,0.  
063108,0.062183,0.061387,0.079174,0.073736,0.067336,0.069612,0.075661,  
0.068886,0.066843,0.074923,0.062516,0.065756,0.072675,0.067433,0.06847  
7,0.071172,0.068447,0.070053,0.071357,0.064018,0.075255,0.063738,0.070  
42,0.06925,0.06686,0.071089,0.067449,0.072804,0.065054,0.069221,0.058,  
0.076373,0.064242,0.062494,0.067893,0.071208,0.067245,0.063715,0.06571  
9,0.072195,0.06741,0.059846,0.059169,0.063596,0.079053,0.065797,0.0763  
81,0.080261,0.069586,0.06856,0.067061,0.072682,0.07073,0.065424,0.0655  
97,0.069816,0.073114,0.070515,0.063855,0.062364,0.068151,0.072096,0.05  
4432,0.068042,0.060615,0.075537,0.074362,0.078675,0.067085,0.071077,0.  
073884,0.072586,0.076136,0.077037,0.073145,0.0674,0.068351,0.066209,0.  
072887,0.073863,0.066528,0.066546,0.07669,0.065008,0.05925,0.07367,0.0  
60176,0.07622,0.062779,0.059098,0.06203,0.070124,0.068979,0.064707,0.0  
59022,0.068453,0.068587,0.0681,0.071192,0.059886  
0.10009,0.11005,0.098775,0.098667,0.092726,0.10146,0.092651,0.094213,0  
.11418,0.10264,0.11492,0.10694,0.098076,0.10146,0.10407,0.10665,0.1014  
5,0.10178,0.10531,0.099769,0.27172,0.25281,0.2923,0.26154,0.09746,0.10

558,0.094776,0.10363,0.099334,0.10062,0.097254,0.10634,0.093766,0.0942  
04,0.10161,0.096834,0.098515,0.10745,0.085143,0.41323,0.19545,0.25419,  
0.17346,0.24735,0.19578,0.23069,0.094103,0.10001,0.097814,0.10227,0.09  
975,0.097272,0.091948,0.099373,0.1099,0.10507,0.1099,0.097198,0.1062,0  
.099953,0.098625,0.41758,0.32907,0.24988,0.24176,0.18314,0.23483,0.252  
66,0.20488,0.24856,0.30322,0.10601,0.10117,0.10198,0.10436,0.10115,0.1  
0787,0.10044,0.099393,0.097731,0.10937,0.096511,0.10846,0.10083,0.1003  
3,0.09656,0.42062,0.43155,0.42961,0.26401,0.2249,0.21314,0.19962,0.185  
09,0.26483,0.2403,0.20941,0.24765,0.093341,0.10284,0.1015,0.10143,0.09  
8532,0.097756,0.10359,0.10013,0.099734,0.1015,0.096401,0.09735,0.10298  
,0.10224,0.096231,0.10101,0.36032,0.35865,0.46973,0.41222,0.30102,0.25  
064,0.2498,0.24067,0.22209,0.25461,0.2467,0.24083,0.24199,0.22026,0.10  
929,0.095657,0.10419,0.11344,0.09858,0.10324,0.10226,0.1016,0.10757,0.  
10337,0.093897,0.1031,0.10202,0.094435,0.10723,0.10453,0.35173,0.30306  
,0.38803,0.43694,0.41932,0.29709,0.19372,0.22021,0.26454,0.27361,0.217  
42,0.22371,0.21762,0.20431,0.29831,0.26721,0.10281,0.10673,0.10335,0.1  
0415,0.10532,0.096757,0.11203,0.10128,0.10978,0.097004,0.10111,0.10212  
,0.11279,0.085675,0.099137,0.094668,0.095116,0.32582,0.26892,0.46248,0  
.5173,0.37308,0.22156,0.20691,0.24827,0.23149,0.26712,0.25507,0.20268,  
0.26421,0.23323,0.29724,0.32461,0.23175,0.10153,0.10615,0.10318,0.0989  
12,0.10318,0.093331,0.099878,0.10651,0.10204,0.10084,0.10338,0.10307,0  
.10279,0.082281,0.089977,0.079807,0.10028,0.395,0.36624,0.4417,0.46934  
,0.40396,0.48812,0.36262,0.23587,0.30872,0.26591,0.31356,0.3013,0.2798  
5,0.21868,0.27626,0.2794,0.25551,0.19058,0.10232,0.086963,0.10148,0.10  
802,0.10592,0.1018,0.099028,0.093148,0.10002,0.10016,0.10057,0.080203,  
0.08469,0.080489,0.094703,0.078105,0.075485,0.10572,0.41618,0.4246,0.4  
3976,0.39138,0.43111,0.51034,0.35711,0.23356,0.26478,0.27266,0.28956,0  
.22345,0.3202,0.24173,0.2333,0.24013,0.19474,0.25865,0.097799,0.1046,0  
.098387,0.099481,0.10802,0.10424,0.10416,0.10098,0.1002,0.076379,0.076  
793,0.090231,0.083197,0.082396,0.087546,0.086822,0.085648,0.084248,0.0  
93042,0.36773,0.46657,0.30517,0.42969,0.32088,0.2611,0.50081,0.25603,0  
.24885,0.19995,0.22917,0.25799,0.2651,0.22599,0.22137,0.2733,0.22918,0  
.24567,0.27147,0.10453,0.10066,0.10839,0.098758,0.1035,0.095152,0.0732  
05,0.086968,0.076283,0.078718,0.089021,0.072293,0.082671,0.09317,0.076  
297,0.076852,0.088806,0.085933,0.39786,0.4297,0.51609,0.35086,0.43883,  
0.41611,0.37323,0.24805,0.19856,0.22032,0.2317,0.26711,0.25039,0.2942,  
0.21157,0.32779,0.25275,0.17285,0.22248,0.10453,0.098138,0.097944,0.08  
9359,0.07704,0.072513,0.085899,0.085853,0.092937,0.085722,0.085667,0.0  
85872,0.085542,0.084936,0.082219,0.086017,0.081404,0.084807,0.49803,0.  
4534,0.49797,0.34947,0.33665,0.45589,0.34643,0.45361,0.41141,0.21632,0  
.25545,0.23682,0.24584,0.23979,0.24913,0.2439,0.27043,0.25533,0.22123,  
0.25712,0.078337,0.081805,0.081636,0.079072,0.081912,0.077779,0.082392  
,0.091405,0.082424,0.080983,0.080626,0.086538,0.083008,0.080996,0.0802  
89,0.08735,0.090603,0.08402,0.40925,0.31039,0.42999,0.4249,0.43073,0.3  
7069,0.49408,0.48874,0.43199,0.23673,0.25805,0.18247,0.17499,0.19539,0  
.1822,0.18008,0.20314,0.16191,0.19359,0.17874,0.074377,0.086678,0.0810  
86,0.085996,0.077521,0.072751,0.079576,0.085106,0.086567,0.082155,0.07  
6278,0.078815,0.085914,0.089494,0.085731,0.076126,0.080986,0.077722,0.  
32361,0.42903,0.42778,0.37713,0.35271,0.40978,0.31075,0.37649,0.41257,  
0.23176,0.20672,0.1436,0.18952,0.14699,0.22528,0.16959,0.21662,0.18397  
,0.21699,0.18626,0.073523,0.08851,0.087979,0.082667,0.080029,0.085603,  
0.086025,0.07997,0.077387,0.080332,0.0848,0.083563,0.088011,0.082234,0

.087196,0.080674,0.083946,0.084805,0.39345,0.39386,0.43402,0.41399,0.41337,0.38489,0.41676,0.20718,0.33614,0.22524,0.19373,0.16628,0.14436,0.15046,0.16765,0.18773,0.17085,0.17043,0.19117,0.14995,0.081697,0.086383,0.081898,0.081306,0.085834,0.071322,0.083701,0.070593,0.079405,0.081764,0.071337,0.079836,0.077545,0.07714,0.085635,0.078353,0.093308,0.079004,0.39679,0.44595,0.42367,0.33817,0.44482,0.46409,0.20951,0.23158,0.22104,0.19093,0.17912,0.24454,0.13369,0.19619,0.18387,0.17699,0.19866,0.18963,0.1561,0.15833,0.081262,0.086775,0.085821,0.082653,0.087482,0.08355,0.076566,0.074382,0.084421,0.085774,0.080992,0.08696,0.075419,0.082332,0.090104,0.082555,0.081256,0.077589,0.39865,0.44355,0.49384,0.43106,0.33529,0.23947,0.23261,0.20121,0.19139,0.26891,0.24876,0.19837,0.19177,0.2211,0.1803,0.18784,0.18178,0.153,0.20559,0.184,0.08561,0.07557,0.065522,0.083079,0.068791,0.085467,0.0827,0.08145,0.085487,0.070943,0.079602,0.084037,0.077005,0.083334,0.08184,0.07335,0.06301,0.084098,0.39149,0.29907,0.43901,0.23796,0.25506,0.21548,0.25252,0.27901,0.30193,0.18417,0.222,0.20396,0.21096,0.15962,0.18799,0.20993,0.19465,0.14944,0.16294,0.22398,0.072129,0.081868,0.080982,0.086335,0.085048,0.092117,0.083801,0.087834,0.076393,0.077407,0.079943,0.089925,0.085315,0.088906,0.077614,0.085179,0.083968,0.089842,0.39504,0.20067,0.3019,0.20532,0.25427,0.2576,0.23183,0.30033,0.21472,0.17889,0.22411,0.13892,0.1896,0.1717,0.16209,0.20183,0.14256,0.22624,0.21975,0.074528,0.08677,0.092801,0.081465,0.088597,0.083889,0.084655,0.080474,0.089674,0.084604,0.080986,0.075506,0.078508,0.0838,0.088805,0.088761,0.083811,0.06664,0.29099,0.2115,0.25465,0.2049,0.18569,0.25349,0.24168,0.22885,0.19134,0.23874,0.18211,0.20843,0.198,0.19254,0.12904,0.16756,0.18702,0.16507,0.17756,0.084442,0.080062,0.087584,0.080908,0.081405,0.085352,0.075354,0.073544,0.087387,0.082161,0.084432,0.084894,0.094348,0.084686,0.091991,0.082276,0.083817,0.064758,0.21387,0.22801,0.19224,0.26068,0.20774,0.20584,0.31542,0.20916,0.25747,0.22912,0.21763,0.20049,0.20833,0.20555,0.19385,0.17889,0.15609,0.15204,0.090991,0.072868,0.08518,0.08332,0.0742,0.086241,0.080562,0.085581,0.093267,0.081239,0.094906,0.088882,0.072157,0.086817,0.0848,0.080385,0.07543,0.072404,0.071119,0.25849,0.23235,0.23374,0.22079,0.28006,0.25455,0.1835,0.16699,0.19783,0.22532,0.21042,0.17816,0.18084,0.1772,0.17609,0.24785,0.16676,0.14369,0.070783,0.08382,0.075492,0.076687,0.084148,0.083513,0.079367,0.093198,0.092508,0.087375,0.088483,0.082553,0.082506,0.081689,0.090346,0.083787,0.083639,0.069552,0.060651,0.057086,0.14821,0.22303,0.19881,0.17763,0.22917,0.22912,0.22481,0.20813,0.25399,0.14437,0.16694,0.15244,0.19435,0.21595,0.16535,0.084168,0.078778,0.079472,0.082892,0.078616,0.085316,0.087067,0.076373,0.074659,0.097469,0.072853,0.086118,0.073117,0.082046,0.079205,0.08378,0.086691,0.084609,0.061456,0.068953,0.06387,0.063321,0.20104,0.29521,0.21882,0.21326,0.29987,0.32704,0.19053,0.25726,0.24108,0.18505,0.2121,0.18087,0.083167,0.087146,0.084603,0.075429,0.080502,0.079388,0.089545,0.078802,0.079145,0.074838,0.075547,0.078379,0.083748,0.089962,0.073702,0.085479,0.076808,0.084426,0.072016,0.087653,0.069201,0.06077,0.059446,0.070213,0.055875,0.067375,0.23929,0.25261,0.24652,0.22948,0.17366,0.2666,0.28205,0.34071,0.089982,0.078996,0.083543,0.084733,0.081276,0.076461,0.076039,0.078663,0.075455,0.079178,0.085347,0.081532,0.079684,0.085826,0.081882,0.077573,0.081946,0.084563,0.072947,0.0772,0.084737,0.080093,0.084155,0.072762,0.064475,0.059522,0.057183,0.066451,0.061507,0.17731,0.22551,0.17149,0.23089,0.20627,0.055739,0.060593,0.087876,0.087932,0.07748,0.079898,0.080415,0.085751,0.082154,0.0803

78,0.083253,0.087254,0.097357,0.077784,0.077304,0.075311,0.08264,0.083  
844,0.088606,0.08223,0.089574,0.080931,0.07798,0.067805,0.062218,0.061  
394,0.059271,0.066518,0.071837,0.060081,0.058278,0.065572,0.055971,0.2  
482,0.21874,0.076567,0.072068,0.054475,0.067392,0.082999,0.082659,0.08  
1124,0.08217,0.068215,0.077007,0.083886,0.078371,0.077769,0.075727,0.0  
86502,0.087244,0.079097,0.080449,0.083006,0.093191,0.08426,0.078337,0.  
080472,0.070786,0.05925,0.063898,0.061789,0.050939,0.068267,0.067281,0  
.057354,0.078249,0.056448,0.064511,0.062859,0.05837,0.06715,0.065144,0  
.059982,0.064425,0.077131,0.073775,0.085722,0.085923,0.087245,0.079391  
,0.08796,0.075034,0.080226,0.09189,0.094602,0.087594,0.08594,0.08651,0  
.085725,0.084506,0.068795,0.067585,0.064837,0.07053,0.060673,0.07525,0  
.062587,0.064767,0.067644,0.06749,0.071258,0.060584,0.06315,0.063411,0  
.06998,0.068135,0.053923,0.058534,0.062906,0.073353,0.083748,0.07666,0  
.081249,0.080819,0.07784,0.086615,0.083431,0.080034,0.072433,0.084451,  
0.081984,0.082998,0.063361,0.059658,0.063352,0.066224,0.06233,0.071194  
,0.071533,0.064464,0.056477,0.057098,0.062888,0.074175,0.064673,0.0700  
15,0.065608,0.061033,0.070709,0.062937,0.057809,0.067654,0.069767,0.07  
527,0.08684,0.088893,0.082806,0.081493,0.078643,0.081465,0.079763,0.07  
9867,0.067171,0.065667,0.066432,0.06369,0.070535,0.064961,0.076549,0.0  
61842,0.065468,0.072942,0.060257,0.077885,0.061731,0.061127,0.064234,0  
.065855,0.055345,0.061133,0.069129,0.069372,0.052214,0.076586,0.066154  
,0.061086,0.065572,0.088274,0.091886,0.082913,0.092756,0.059973,0.0575  
37,0.060284,0.05569,0.07022,0.056433,0.061887,0.060906,0.056532,0.0672  
79,0.060132,0.071621,0.063524,0.06579,0.055765,0.069364,0.073395,0.067  
314,0.059093,0.060169,0.062031,0.062655,0.057372,0.058227,0.064353,0.0  
67556,0.066946,0.06581,0.061261,0.073288,0.067802,0.060713,0.06746,0.0  
65059,0.063126,0.065104,0.067384,0.058403,0.0526,0.062888,0.06768,0.07  
0226,0.069552,0.057658,0.068596,0.052903,0.07284,0.054399,0.057975,0.0  
55231,0.065279,0.064698,0.075765,0.069081,0.063046,0.065038,0.063645,0  
.063145,0.067672,0.058129,0.0623,0.060133,0.057741,0.071597,0.056719,0  
.062166,0.070804,0.058371,0.056782,0.069753,0.062447,0.066444,0.058595  
,0.058355,0.068258,0.05683,0.062856,0.04443,0.057385,0.069361,0.060575  
,0.061209,0.058771,0.051934,0.054368,0.064339,0.068854,0.062321,0.0583  
61,0.052629,0.056365,0.062936,0.070309,0.072781,0.059847,0.061025,0.05  
5935,0.072042,0.070698,0.06042,0.064945,0.073134,0.065417,0.059271,0.0  
68433,0.058402,0.056725,0.073488,0.064214,0.062997,0.063071,0.061059,0  
.062769,0.071611,0.059523,0.068681,0.05729,0.06592,0.064937,0.061776,0  
.069575,0.059607,0.072691,0.056791,0.064825,0.053387,0.069933,0.060504  
,0.062113,0.065491,0.069809,0.062878,0.058922,0.06281,0.069268,0.06266  
9,0.053527,0.052704,0.058555,0.069188,0.062438,0.070615,0.078148,0.066  
187,0.065253,0.05744,0.071065,0.067858,0.059577,0.060521,0.061022,0.06  
9521,0.066909,0.059728,0.060867,0.063068,0.068877,0.051639,0.063506,0.  
052968,0.072109,0.068392,0.071845,0.067104,0.061838,0.072215,0.067074,  
0.073459,0.073653,0.068402,0.067131,0.065236,0.064519,0.066454,0.06876  
2,0.064206,0.060821,0.074395,0.058872,0.056483,0.06419,0.055563,0.0710  
08,0.061369,0.055266,0.056298,0.064602,0.062218,0.059436,0.052727,0.06  
5922,0.061689,0.060593,0.069109,0.055276  
0.092995,0.10206,0.090386,0.088279,0.087782,0.095052,0.085434,0.087492  
,0.10903,0.094316,0.10455,0.099477,0.091252,0.095318,0.097899,0.10246,  
0.092426,0.09502,0.097174,0.094513,0.26051,0.23111,0.27653,0.27443,0.0  
92071,0.097147,0.087216,0.095963,0.094707,0.093545,0.09424,0.098725,0.  
087122,0.090706,0.094046,0.092841,0.094143,0.1009,0.07722,0.43086,0.19

873,0.2415,0.15309,0.25139,0.21273,0.20448,0.089194,0.091071,0.09233,0.094817,0.0947,0.089743,0.089762,0.089791,0.10537,0.10022,0.10128,0.093939,0.098281,0.091875,0.09118,0.39914,0.29569,0.26015,0.21788,0.17611,0.23138,0.26226,0.20299,0.2485,0.27746,0.097981,0.096677,0.097602,0.10078,0.093229,0.10047,0.095845,0.092139,0.089416,0.098657,0.090087,0.10123,0.099046,0.090935,0.091224,0.41146,0.41751,0.40266,0.24733,0.21717,0.21395,0.21219,0.17971,0.24428,0.24758,0.20195,0.2176,0.087228,0.094635,0.095684,0.09665,0.092867,0.094555,0.094425,0.090779,0.091373,0.090419,0.088016,0.091231,0.097544,0.097542,0.091936,0.094906,0.33503,0.37193,0.46527,0.38307,0.29138,0.21168,0.24694,0.23587,0.18987,0.22835,0.23514,0.24177,0.25691,0.1882,0.098944,0.087133,0.098394,0.10466,0.08921,0.096885,0.090557,0.091571,0.099309,0.092322,0.088755,0.095027,0.093518,0.090296,0.10118,0.095656,0.4274,0.2523,0.38217,0.39253,0.48543,0.27227,0.18988,0.21808,0.23602,0.26196,0.20989,0.2041,0.20455,0.1809,0.27009,0.23062,0.092904,0.098247,0.096333,0.096607,0.09841,0.090898,0.10464,0.091617,0.10271,0.088465,0.093919,0.095918,0.10272,0.078018,0.094624,0.088196,0.088393,0.31319,0.26178,0.46152,0.47876,0.36736,0.26138,0.20053,0.25737,0.22592,0.25875,0.25351,0.17591,0.24913,0.22785,0.29679,0.3017,0.21982,0.095824,0.098785,0.09395,0.091022,0.095636,0.086762,0.090845,0.098473,0.090514,0.095266,0.096036,0.094394,0.093422,0.075976,0.082788,0.073842,0.093307,0.3927,0.3933,0.46702,0.46434,0.37631,0.44991,0.39386,0.20288,0.31674,0.25242,0.2952,0.29557,0.26477,0.22798,0.27447,0.2792,0.24011,0.17828,0.096338,0.08021,0.094107,0.10367,0.095628,0.094353,0.091992,0.088655,0.093984,0.093834,0.094051,0.080681,0.078146,0.068795,0.091816,0.072254,0.072101,0.098525,0.38438,0.42963,0.42895,0.33793,0.41239,0.47278,0.3543,0.21101,0.2495,0.27402,0.28312,0.22247,0.32028,0.24125,0.21742,0.23508,0.18688,0.25096,0.087123,0.097254,0.093342,0.090823,0.098557,0.097701,0.097528,0.095547,0.090141,0.072611,0.071939,0.085224,0.07865,0.078279,0.081174,0.079602,0.077402,0.077565,0.089119,0.38913,0.43446,0.34205,0.42135,0.33267,0.28329,0.50675,0.24219,0.25491,0.20064,0.22702,0.27543,0.26151,0.19553,0.20507,0.27063,0.21645,0.24861,0.2708,0.095002,0.093663,0.10347,0.095512,0.096247,0.085342,0.068229,0.080864,0.072071,0.074782,0.084036,0.069051,0.077525,0.086036,0.072257,0.069932,0.083668,0.079873,0.41378,0.40596,0.48784,0.3219,0.42548,0.42141,0.42358,0.23885,0.19339,0.21971,0.22111,0.25619,0.24496,0.27999,0.22227,0.32648,0.23685,0.17652,0.20994,0.099307,0.092449,0.095105,0.082732,0.070568,0.072425,0.079895,0.079303,0.087527,0.079722,0.080767,0.081325,0.079674,0.080658,0.078363,0.078239,0.077511,0.08044,0.45582,0.40377,0.48554,0.32482,0.32043,0.40124,0.30096,0.44897,0.45426,0.22121,0.23591,0.24115,0.25533,0.22618,0.25849,0.2354,0.2679,0.24659,0.2046,0.24605,0.07292,0.080849,0.074874,0.075235,0.072833,0.071681,0.078297,0.086171,0.075643,0.071318,0.073436,0.082481,0.07576,0.074527,0.072496,0.083368,0.087589,0.079013,0.4126,0.29536,0.4209,0.43578,0.38428,0.33569,0.49172,0.4056,0.41049,0.23831,0.24287,0.17466,0.1728,0.18173,0.18387,0.17162,0.18853,0.16078,0.17604,0.17722,0.072705,0.082368,0.077813,0.07894,0.074438,0.069739,0.074021,0.077377,0.080142,0.077848,0.068096,0.074486,0.077454,0.085571,0.075409,0.069454,0.079811,0.069836,0.32759,0.39867,0.40984,0.35524,0.35086,0.38193,0.29922,0.347,0.4168,0.22507,0.20235,0.14125,0.18902,0.13222,0.20843,0.16094,0.21045,0.20055,0.20167,0.17888,0.0721,0.083114,0.080703,0.078298,0.074269,0.079629,0.079583,0.073976,0.070864,0.071189,0.077798,0.081794,0.081339,0.076176,0.078693,0.075432,0.078476,0.080357,0.40056,0.40217,0.406

61,0.43693,0.40507,0.44657,0.38623,0.19846,0.30803,0.21913,0.20317,0.15634,0.14201,0.14809,0.16507,0.17798,0.16966,0.16146,0.17451,0.15513,0.078695,0.083731,0.079924,0.071998,0.078122,0.067522,0.077119,0.065885,0.076164,0.073628,0.065142,0.07706,0.070845,0.074022,0.078242,0.078272,0.087811,0.073817,0.38212,0.41141,0.41202,0.33395,0.43749,0.46146,0.1953,0.21356,0.22449,0.19645,0.19253,0.2276,0.14025,0.19361,0.17749,0.17577,0.20523,0.17922,0.13813,0.15924,0.077767,0.082457,0.07621,0.075989,0.0794,0.078896,0.074,0.071631,0.079782,0.082111,0.07582,0.081156,0.06907,0.079166,0.084652,0.082066,0.07941,0.070083,0.36801,0.38563,0.47949,0.44268,0.3507,0.22229,0.22496,0.17123,0.16796,0.25731,0.27547,0.19139,0.18259,0.23479,0.16398,0.18921,0.18891,0.13934,0.19674,0.16591,0.080512,0.069389,0.064431,0.075753,0.059337,0.07566,0.078686,0.074467,0.082859,0.067817,0.076499,0.075913,0.072059,0.077057,0.076001,0.068403,0.063407,0.079387,0.34824,0.29921,0.42217,0.23123,0.23815,0.20182,0.21415,0.28223,0.2849,0.18942,0.23363,0.20926,0.19465,0.15391,0.20314,0.20569,0.1931,0.14054,0.17269,0.23272,0.067021,0.079094,0.077383,0.085592,0.083518,0.084608,0.077188,0.081436,0.068703,0.074189,0.07381,0.083285,0.078444,0.08323,0.071562,0.07594,0.079196,0.079787,0.42864,0.19065,0.29999,0.19643,0.24944,0.26897,0.2705,0.28931,0.22589,0.18213,0.21726,0.13163,0.17092,0.17258,0.15014,0.19933,0.12738,0.24054,0.21135,0.068837,0.08613,0.089325,0.076851,0.085575,0.080422,0.078438,0.069793,0.086613,0.079544,0.077042,0.068849,0.068426,0.079502,0.080614,0.083286,0.082181,0.064653,0.28729,0.20502,0.26754,0.16899,0.17149,0.23889,0.24993,0.21052,0.16974,0.23757,0.18093,0.20864,0.18338,0.17808,0.12017,0.15972,0.18684,0.14264,0.16079,0.084165,0.073302,0.080437,0.077809,0.078914,0.076938,0.069017,0.069558,0.084587,0.071567,0.077949,0.083205,0.085745,0.077144,0.086145,0.077957,0.081376,0.061378,0.19938,0.22506,0.19524,0.25434,0.22328,0.20268,0.31465,0.1954,0.24473,0.22586,0.19029,0.18607,0.19861,0.17636,0.18433,0.16136,0.14788,0.16199,0.085797,0.071444,0.08184,0.076735,0.069428,0.082953,0.080992,0.082191,0.088673,0.076219,0.08913,0.081356,0.064587,0.085715,0.079447,0.075627,0.069114,0.066583,0.069852,0.25217,0.21849,0.21283,0.21888,0.2681,0.27276,0.17908,0.1428,0.18434,0.21147,0.20143,0.17734,0.17836,0.17058,0.14863,0.23401,0.14598,0.1588,0.067432,0.080324,0.073252,0.071388,0.083681,0.075339,0.075899,0.090697,0.08812,0.083788,0.081931,0.075135,0.079517,0.078443,0.086473,0.07357,0.078236,0.065116,0.060394,0.051259,0.1483,0.20695,0.21506,0.17973,0.21946,0.2208,0.23139,0.22352,0.21409,0.13701,0.16795,0.15321,0.19118,0.20297,0.16633,0.080197,0.074209,0.078201,0.077042,0.078002,0.078667,0.082288,0.074701,0.065256,0.091866,0.069484,0.078253,0.067982,0.080617,0.075379,0.080422,0.083217,0.079491,0.060575,0.061855,0.059676,0.061368,0.1843,0.26511,0.19349,0.2384,0.27486,0.33359,0.19504,0.26908,0.24751,0.19311,0.2017,0.17367,0.076537,0.079826,0.079454,0.070018,0.075769,0.070869,0.080404,0.072652,0.072688,0.072217,0.06971,0.071714,0.073511,0.081987,0.071981,0.077395,0.070087,0.07742,0.067641,0.083643,0.066936,0.058208,0.057252,0.066854,0.053301,0.064323,0.23861,0.24677,0.23693,0.21878,0.15592,0.23396,0.25507,0.31899,0.088075,0.076108,0.078712,0.080481,0.076188,0.070485,0.06978,0.075528,0.074365,0.073957,0.080242,0.073132,0.077344,0.079151,0.078052,0.073195,0.074774,0.078548,0.06912,0.072408,0.083042,0.075936,0.079482,0.066545,0.065179,0.05796,0.055951,0.069968,0.061449,0.1817,0.22639,0.17173,0.24352,0.20568,0.056729,0.054839,0.080942,0.078715,0.071507,0.072074,0.078855,0.079429,0.07457,0.075409,0.077687,0.0793,0.090143,0.071344,0.073841,0

.071033,0.0788,0.076567,0.083838,0.074047,0.082362,0.075255,0.074866,0.057652,0.057121,0.0591,0.058813,0.070866,0.066866,0.059108,0.060656,0.059041,0.052365,0.22392,0.20549,0.072945,0.068533,0.052115,0.060642,0.076745,0.079343,0.074445,0.078879,0.064603,0.07773,0.083122,0.074402,0.070663,0.068271,0.075987,0.081428,0.070854,0.074924,0.079066,0.085634,0.079754,0.076626,0.076158,0.065667,0.057777,0.061425,0.059325,0.050218,0.063805,0.057881,0.047661,0.074115,0.05599,0.061227,0.057384,0.055091,0.066459,0.059608,0.053986,0.062737,0.068267,0.066145,0.085426,0.082932,0.083717,0.078493,0.078459,0.066146,0.078708,0.086209,0.087975,0.082962,0.082199,0.081922,0.081077,0.078843,0.070023,0.06368,0.061328,0.070879,0.061516,0.07437,0.060087,0.062842,0.064321,0.062823,0.068232,0.059505,0.056336,0.064367,0.062648,0.065813,0.05101,0.058085,0.060116,0.071274,0.081224,0.071431,0.074974,0.07227,0.074306,0.081022,0.080516,0.076919,0.068349,0.07805,0.075448,0.076755,0.054521,0.062119,0.059269,0.061672,0.057165,0.067356,0.067782,0.062156,0.052656,0.051929,0.057688,0.067524,0.063918,0.062226,0.063544,0.059405,0.068841,0.061198,0.054225,0.067821,0.065072,0.072553,0.083631,0.088796,0.08133,0.070975,0.073991,0.079776,0.072861,0.076505,0.065905,0.059897,0.063432,0.055213,0.069953,0.06241,0.072263,0.061797,0.064712,0.068963,0.060292,0.074185,0.052048,0.058924,0.059771,0.059461,0.051255,0.063066,0.0688,0.066295,0.049742,0.073219,0.064775,0.056821,0.06195,0.08263,0.085364,0.076649,0.084033,0.057948,0.049423,0.058845,0.055266,0.066121,0.052768,0.057818,0.060097,0.055566,0.063092,0.052767,0.067483,0.064395,0.058915,0.054408,0.067121,0.066961,0.068367,0.057859,0.056679,0.054144,0.061091,0.049648,0.054824,0.057138,0.063798,0.064171,0.06261,0.05608,0.067211,0.062716,0.058481,0.067446,0.059341,0.061447,0.055841,0.066267,0.054881,0.055094,0.056547,0.061561,0.066197,0.068913,0.058043,0.066924,0.04974,0.069889,0.053627,0.055812,0.045908,0.063981,0.065352,0.074301,0.064802,0.065002,0.059798,0.060428,0.06222,0.063912,0.056239,0.060482,0.057682,0.050861,0.066691,0.053002,0.057733,0.068365,0.053646,0.053157,0.065171,0.061248,0.06224,0.055249,0.055463,0.063335,0.053137,0.063751,0.04246,0.054916,0.063977,0.06316,0.056864,0.060547,0.050482,0.052691,0.05698,0.068034,0.066036,0.057562,0.054063,0.055941,0.058626,0.066013,0.068579,0.055809,0.057906,0.054171,0.069711,0.066096,0.051631,0.062357,0.067283,0.062043,0.05489,0.067401,0.056352,0.060334,0.067662,0.061692,0.060773,0.063822,0.059164,0.06109,0.069621,0.059014,0.066676,0.050614,0.064718,0.06292,0.0589,0.066668,0.056741,0.064596,0.056602,0.060293,0.047705,0.066707,0.061901,0.061936,0.065108,0.067879,0.059175,0.056479,0.060356,0.064812,0.063468,0.051096,0.048498,0.057801,0.068396,0.054478,0.070575,0.075947,0.068179,0.062434,0.051615,0.064362,0.061513,0.059195,0.06049,0.05677,0.067347,0.064343,0.060634,0.055952,0.057503,0.062364,0.048989,0.053793,0.051876,0.063995,0.065685,0.06454,0.060833,0.059616,0.068873,0.061726,0.072899,0.069512,0.064629,0.061955,0.060532,0.062258,0.066571,0.067668,0.06217,0.058286,0.071633,0.052047,0.049353,0.063214,0.052993,0.071587,0.05706,0.057073,0.052448,0.061778,0.062852,0.055842,0.048963,0.064826,0.059988,0.055249,0.063108,0.050781,0.0883,0.097975,0.082719,0.080507,0.082451,0.089439,0.082934,0.084608,0.10324,0.090011,0.095081,0.091167,0.08578,0.089184,0.095181,0.093153,0.087999,0.088512,0.093685,0.090072,0.22328,0.22955,0.28254,0.2631,0.085477,0.093016,0.085011,0.090307,0.090331,0.08564,0.090172,0.093654,0.081897,0.086542,0.086449,0.085556,0.087013,0.095917,0.072924,0.39302,0.21984,0.23711,0.16278,0.24615,0.19534,0.19834,0.083072,0.085517,0.089



188,0.089465,0.08503,0.085944,0.086304,0.086838,0.097736,0.095914,0.094881,0.084509,0.090671,0.08363,0.084376,0.3757,0.25753,0.26431,0.20613,0.19013,0.2347,0.2538,0.20915,0.23483,0.27741,0.090975,0.094313,0.09012,0.092074,0.08591,0.091803,0.086305,0.086838,0.084129,0.089526,0.07995,0.098258,0.095622,0.084413,0.086297,0.38639,0.38869,0.41654,0.24088,0.20609,0.21276,0.19039,0.16335,0.25929,0.22794,0.19894,0.22198,0.083852,0.089226,0.088364,0.088894,0.089035,0.089725,0.088949,0.086128,0.084322,0.085579,0.082787,0.089668,0.089564,0.091049,0.086639,0.088156,0.31608,0.34702,0.51887,0.38788,0.26361,0.21519,0.24272,0.24429,0.20117,0.22053,0.22008,0.2436,0.24071,0.17406,0.090013,0.082355,0.089062,0.098681,0.088315,0.091947,0.080668,0.087329,0.092774,0.086752,0.084912,0.085896,0.087271,0.084935,0.095675,0.089995,0.38064,0.30605,0.41013,0.39743,0.44282,0.25367,0.17973,0.2361,0.2291,0.24942,0.20827,0.19363,0.18783,0.15649,0.26148,0.24185,0.08684,0.093477,0.089587,0.089341,0.09358,0.085113,0.10019,0.085174,0.093604,0.08344,0.08751,0.088851,0.094149,0.075256,0.090473,0.084725,0.086134,0.33279,0.2519,0.44962,0.48742,0.36567,0.24271,0.19371,0.24914,0.22266,0.23784,0.22727,0.18204,0.27178,0.23973,0.29283,0.27969,0.21279,0.091963,0.094959,0.091162,0.086913,0.091649,0.082945,0.082292,0.089613,0.086103,0.089311,0.085297,0.089538,0.089704,0.071356,0.080289,0.072348,0.086133,0.34372,0.37852,0.48619,0.49924,0.36909,0.43466,0.38674,0.20165,0.28834,0.23649,0.25874,0.29646,0.27359,0.21205,0.27578,0.28989,0.23931,0.16449,0.088788,0.074402,0.089144,0.094756,0.092519,0.086791,0.084833,0.08238,0.086693,0.088566,0.085843,0.075615,0.075486,0.068156,0.08497,0.067625,0.070457,0.095056,0.31411,0.47045,0.4467,0.3341,0.42152,0.45188,0.33455,0.20082,0.24209,0.2583,0.29282,0.20632,0.30824,0.22537,0.20768,0.2346,0.19965,0.24344,0.082974,0.09027,0.08838,0.084718,0.091398,0.093261,0.088394,0.09194,0.081879,0.068526,0.066732,0.081901,0.071456,0.076104,0.073328,0.074004,0.074483,0.072899,0.084988,0.4117,0.40816,0.33766,0.45252,0.31738,0.27283,0.48633,0.24675,0.2444,0.20803,0.19153,0.26984,0.26815,0.20848,0.20307,0.27193,0.20604,0.22617,0.25261,0.090423,0.08693,0.095672,0.089588,0.08751,0.085319,0.067185,0.078624,0.07043,0.071946,0.076524,0.068354,0.070177,0.079599,0.070385,0.073368,0.079086,0.075268,0.40146,0.37787,0.47195,0.29802,0.43782,0.41267,0.41598,0.21185,0.16735,0.19926,0.21764,0.25735,0.24892,0.24452,0.21306,0.31973,0.23173,0.16607,0.20486,0.093949,0.088423,0.090877,0.080619,0.068768,0.071694,0.072434,0.074389,0.083686,0.072984,0.074161,0.07533,0.079408,0.07842,0.074205,0.070201,0.069615,0.076568,0.43957,0.41241,0.48284,0.35677,0.30669,0.40772,0.30628,0.44586,0.42478,0.21374,0.22179,0.23378,0.23781,0.22767,0.23105,0.25031,0.27028,0.23525,0.22377,0.22928,0.072812,0.078497,0.072969,0.07012,0.069259,0.066254,0.07116,0.081567,0.074773,0.069412,0.07108,0.079023,0.076689,0.070978,0.073211,0.077739,0.086641,0.070679,0.41954,0.29321,0.46015,0.43795,0.3723,0.35571,0.45315,0.39747,0.40818,0.21979,0.22908,0.17366,0.17631,0.18992,0.15025,0.1764,0.17999,0.15951,0.17959,0.17373,0.071526,0.078684,0.074736,0.077369,0.072317,0.06775,0.070806,0.074949,0.075765,0.079086,0.065401,0.070346,0.072698,0.078431,0.071253,0.070612,0.077785,0.065226,0.31885,0.37462,0.4156,0.2968,0.34072,0.42339,0.30174,0.35316,0.44774,0.21839,0.20566,0.13421,0.18496,0.13284,0.18756,0.13941,0.20853,0.20362,0.20093,0.17687,0.069993,0.077009,0.078777,0.075927,0.069858,0.073895,0.075838,0.068342,0.071854,0.067173,0.073508,0.078166,0.080827,0.077341,0.074902,0.075699,0.074634,0.076988,0.40187,0.42845,0.41228,0.44017,0.40561,0.41957,0.38108,0.21761,0.2941,0.

19215,0.20511,0.16126,0.14911,0.1466,0.15965,0.1764,0.1583,0.15271,0.17189,0.15359,0.074787,0.080737,0.073771,0.070957,0.073704,0.065196,0.071477,0.062422,0.073115,0.066008,0.060564,0.073931,0.06749,0.072979,0.071566,0.078437,0.086533,0.067088,0.35885,0.42023,0.4325,0.33818,0.39132,0.43913,0.2025,0.19989,0.1927,0.20845,0.19729,0.20126,0.13429,0.18255,0.16732,0.15634,0.20023,0.16928,0.11448,0.15665,0.075304,0.075994,0.070307,0.07512,0.076465,0.071416,0.073414,0.067045,0.074256,0.074123,0.070711,0.075033,0.065857,0.076956,0.080477,0.080785,0.074467,0.068955,0.41862,0.38036,0.47372,0.44047,0.3206,0.23248,0.21169,0.18628,0.17759,0.26655,0.25517,0.19125,0.17911,0.22104,0.15831,0.18468,0.1768,0.14453,0.17993,0.17415,0.076937,0.064694,0.060688,0.072954,0.057597,0.071202,0.076617,0.067031,0.076949,0.066014,0.071981,0.072359,0.069408,0.075441,0.072972,0.064146,0.063197,0.073123,0.37435,0.28443,0.42717,0.22554,0.19769,0.20386,0.20113,0.25021,0.29188,0.1876,0.23174,0.2028,0.18666,0.13815,0.18644,0.1971,0.17154,0.12968,0.14964,0.22517,0.065497,0.076453,0.071389,0.079442,0.078912,0.081837,0.07013,0.07675,0.067365,0.069551,0.073535,0.080852,0.072649,0.079492,0.071051,0.070254,0.07321,0.073663,0.39709,0.18753,0.29268,0.19568,0.24991,0.23035,0.26388,0.28153,0.22712,0.19257,0.2331,0.13064,0.15829,0.18982,0.15297,0.18355,0.12097,0.22409,0.20445,0.069595,0.08112,0.082365,0.077421,0.08604,0.080825,0.073132,0.068609,0.083134,0.079493,0.072909,0.065853,0.065461,0.077512,0.07515,0.080007,0.078294,0.059828,0.26511,0.20072,0.27836,0.15301,0.19958,0.22987,0.22058,0.22637,0.16579,0.25208,0.17416,0.20039,0.18065,0.16378,0.11391,0.14955,0.18558,0.13645,0.15667,0.080876,0.071504,0.078341,0.072595,0.078591,0.071489,0.063195,0.0664,0.080623,0.070803,0.07481,0.079811,0.077413,0.072262,0.083154,0.074409,0.077851,0.060374,0.19352,0.20676,0.19444,0.2487,0.22712,0.20008,0.29636,0.20039,0.23245,0.23377,0.16883,0.18805,0.19219,0.18518,0.17942,0.1632,0.14249,0.16016,0.079352,0.068826,0.077144,0.076724,0.068569,0.076397,0.076962,0.077816,0.084061,0.071925,0.085407,0.076245,0.063534,0.081148,0.077228,0.07089,0.067545,0.065523,0.065097,0.23846,0.21879,0.21342,0.21747,0.27675,0.27639,0.15749,0.14273,0.20102,0.19839,0.19264,0.16408,0.16801,0.16738,0.14365,0.23835,0.13906,0.14448,0.063473,0.076011,0.069239,0.071622,0.076732,0.071006,0.07182,0.085338,0.088041,0.080471,0.079957,0.06634,0.079412,0.076476,0.081581,0.068081,0.073099,0.062249,0.057133,0.047186,0.13552,0.21606,0.19813,0.16596,0.1947,0.21684,0.21865,0.22148,0.21719,0.13191,0.18111,0.15383,0.17087,0.1964,0.16498,0.076521,0.074019,0.07428,0.074064,0.076595,0.077207,0.075152,0.071444,0.059098,0.084286,0.068352,0.073151,0.061378,0.07162,0.071567,0.077739,0.082122,0.079095,0.053529,0.060104,0.059382,0.06293,0.16693,0.25481,0.1664,0.22304,0.25302,0.32343,0.19802,0.27411,0.21475,0.19284,0.21321,0.16833,0.075674,0.076806,0.074978,0.06416,0.071572,0.07086,0.078162,0.065136,0.074524,0.068824,0.066659,0.067623,0.068844,0.077395,0.07023,0.073709,0.066396,0.072915,0.064452,0.081917,0.067131,0.058099,0.052762,0.061747,0.053617,0.061767,0.23187,0.24386,0.23926,0.21163,0.15328,0.2379,0.26269,0.2818,0.08143,0.071572,0.074419,0.073815,0.073441,0.067788,0.070327,0.072831,0.072089,0.070877,0.074912,0.069435,0.072421,0.07586,0.077326,0.069401,0.065741,0.072989,0.065965,0.072154,0.079199,0.070845,0.078284,0.063531,0.06207,0.055957,0.060624,0.061013,0.058325,0.18933,0.21141,0.17433,0.22502,0.20214,0.055131,0.050465,0.0781,0.075102,0.065902,0.064645,0.075728,0.076912,0.071758,0.071443,0.072425,0.073125,0.087101,0.067448,0.066807,0.067406,0.073128,0.076646,0.078558,0.071466,0.075061,0

.070973,0.074549,0.056572,0.050761,0.060522,0.055893,0.070714,0.060295,  
0.059173,0.061309,0.062667,0.050411,0.2339,0.21139,0.06768,0.069092,0.  
.053557,0.062392,0.075632,0.077252,0.069715,0.076112,0.063902,0.07647,  
0.074517,0.071905,0.067539,0.063147,0.072365,0.07797,0.070714,0.070328  
,0.074613,0.084957,0.072605,0.073563,0.07357,0.064183,0.057377,0.05498  
5,0.054245,0.050749,0.062028,0.055628,0.048174,0.073015,0.054375,0.060  
118,0.057703,0.055388,0.058646,0.056175,0.051468,0.065898,0.066237,0.0  
60643,0.086096,0.074856,0.07741,0.073129,0.07476,0.06563,0.075931,0.08  
0849,0.08589,0.083168,0.079225,0.075697,0.074638,0.072864,0.067455,0.0  
63427,0.0587,0.06425,0.057473,0.067872,0.054324,0.05979,0.062564,0.058  
953,0.066835,0.054201,0.053171,0.058015,0.062337,0.064278,0.046717,0.0  
59163,0.053951,0.06768,0.081228,0.069268,0.070523,0.068354,0.068474,0.  
076937,0.07521,0.077349,0.066175,0.071704,0.072861,0.073106,0.051313,0.  
.057213,0.054599,0.057348,0.058699,0.061636,0.064769,0.060893,0.052688  
,0.051151,0.054921,0.062425,0.060189,0.059173,0.057842,0.052904,0.0666  
29,0.053621,0.052687,0.065664,0.064243,0.06841,0.077341,0.081629,0.075  
507,0.065543,0.070731,0.080531,0.070003,0.071602,0.065235,0.056057,0.0  
61027,0.049944,0.06645,0.057166,0.067637,0.058557,0.057212,0.064467,0.  
058058,0.071543,0.052967,0.05418,0.05499,0.060529,0.052292,0.057653,0.  
064351,0.067766,0.051706,0.070689,0.064057,0.054259,0.057211,0.080083,  
0.0832,0.072026,0.082763,0.052004,0.049673,0.061389,0.055331,0.06432,0.  
.055764,0.052942,0.057181,0.055655,0.062111,0.055956,0.069463,0.05674,  
0.059486,0.05247,0.06172,0.064096,0.067908,0.057054,0.055115,0.053512,  
0.058495,0.047457,0.051877,0.054242,0.062346,0.065875,0.058656,0.05207  
4,0.063333,0.058457,0.055764,0.065884,0.05701,0.05492,0.05283,0.061546  
,0.048894,0.053727,0.05274,0.059846,0.063972,0.066062,0.054927,0.06123  
2,0.046638,0.061273,0.048693,0.055455,0.046363,0.061374,0.06348,0.0685  
24,0.060128,0.062815,0.057537,0.062236,0.062891,0.062467,0.056848,0.06  
1349,0.061441,0.052763,0.059926,0.051822,0.049779,0.065406,0.05368,0.0  
50911,0.060228,0.060738,0.062854,0.051731,0.055902,0.063491,0.05087,0.  
062441,0.047568,0.05386,0.068462,0.058458,0.058654,0.057721,0.048946,0.  
.050736,0.054781,0.06467,0.066093,0.054066,0.05496,0.05558,0.052339,0.  
063874,0.067061,0.054625,0.058067,0.05209,0.066506,0.062686,0.051473,0.  
.057333,0.06026,0.064075,0.052706,0.06631,0.0533,0.058725,0.066956,0.0  
62996,0.063023,0.062159,0.060577,0.059053,0.065968,0.054552,0.065036,0.  
.047922,0.063167,0.059105,0.056094,0.060574,0.056973,0.062914,0.05514,  
0.057566,0.049424,0.067935,0.064382,0.061795,0.061247,0.064329,0.05496  
,0.055541,0.059347,0.056824,0.062866,0.047323,0.045766,0.053432,0.0701  
22,0.053118,0.066573,0.072396,0.065852,0.063681,0.050393,0.061013,0.05  
8702,0.055079,0.057987,0.055334,0.065976,0.062649,0.055394,0.053539,0.  
061448,0.061571,0.047866,0.059473,0.051288,0.062791,0.0621,0.06399,0.0  
66673,0.057026,0.064477,0.05668,0.066145,0.067808,0.064682,0.061801,0.  
060056,0.059162,0.066839,0.062257,0.061907,0.062083,0.066027,0.051275,  
0.049579,0.058464,0.052501,0.072231,0.056501,0.056826,0.050221,0.05954  
5,0.061625,0.053304,0.047868,0.065615,0.054117,0.055733,0.059607,0.048  
659  
0.086154,0.091099,0.081233,0.078005,0.076055,0.084933,0.079551,0.07930  
2,0.10083,0.0852,0.090364,0.082668,0.081145,0.078772,0.088379,0.086722  
,0.081261,0.084768,0.087944,0.084717,0.20849,0.21083,0.28203,0.2481,0.  
081193,0.088264,0.080866,0.088146,0.087152,0.080343,0.084369,0.08968,0.  
.078775,0.082019,0.081844,0.083684,0.081929,0.090392,0.071144,0.36164,  
0.23269,0.24764,0.14723,0.24941,0.22124,0.2032,0.079746,0.07824,0.0834

64,0.083182,0.079262,0.082381,0.085686,0.082455,0.096991,0.091428,0.092883,0.081361,0.084286,0.077953,0.083492,0.33382,0.26928,0.2642,0.19712,0.20117,0.24328,0.23191,0.21193,0.21822,0.26559,0.089156,0.091499,0.090349,0.088946,0.080878,0.087379,0.079934,0.084958,0.082153,0.085955,0.078943,0.092657,0.092035,0.081039,0.079261,0.37334,0.40623,0.46535,0.2521,0.20246,0.20782,0.19367,0.20025,0.25162,0.23533,0.20504,0.22091,0.07858,0.085075,0.086303,0.084845,0.087048,0.08255,0.084656,0.08013,0.082369,0.081032,0.077675,0.083918,0.087092,0.086124,0.084352,0.087391,0.3098,0.32543,0.53139,0.37426,0.24589,0.2227,0.23462,0.23942,0.19248,0.22215,0.19257,0.22132,0.23305,0.18165,0.08702,0.079709,0.084733,0.09658,0.08258,0.087355,0.080199,0.081112,0.086286,0.079699,0.08124,0.077676,0.081023,0.08219,0.089265,0.083417,0.34722,0.3194,0.44646,0.38153,0.41146,0.21493,0.18856,0.21153,0.23304,0.26439,0.21036,0.20265,0.19121,0.15417,0.24883,0.23161,0.082964,0.086695,0.086518,0.082822,0.086475,0.08319,0.092341,0.079617,0.091006,0.078897,0.083793,0.087691,0.090161,0.072761,0.087902,0.08073,0.084439,0.33102,0.29939,0.46122,0.45584,0.34443,0.2524,0.18921,0.24608,0.22045,0.21829,0.23124,0.19154,0.2648,0.22276,0.27732,0.30916,0.19846,0.084151,0.090918,0.087243,0.083634,0.088687,0.083001,0.077065,0.081464,0.083317,0.085102,0.081555,0.084784,0.085902,0.069364,0.074994,0.068981,0.078315,0.29697,0.37659,0.44925,0.50645,0.34163,0.39718,0.3625,0.18972,0.27893,0.22471,0.26041,0.29737,0.25463,0.20589,0.26996,0.27057,0.22496,0.15211,0.082426,0.06625,0.089595,0.090799,0.090899,0.082875,0.082274,0.077064,0.079657,0.086262,0.082859,0.073384,0.072844,0.062268,0.079276,0.067278,0.067904,0.090388,0.34797,0.47161,0.43401,0.35766,0.44578,0.42312,0.29897,0.18854,0.2118,0.24196,0.27962,0.19127,0.29261,0.22088,0.21658,0.22978,0.18168,0.22811,0.079784,0.087795,0.082418,0.084246,0.087921,0.087535,0.086018,0.08631,0.079839,0.065482,0.063638,0.073648,0.069921,0.072339,0.069129,0.068062,0.074092,0.069074,0.080896,0.39663,0.38424,0.29186,0.46787,0.33404,0.32479,0.49093,0.23316,0.24325,0.20614,0.18997,0.25232,0.25451,0.19642,0.18923,0.27141,0.20199,0.22585,0.23789,0.08673,0.082959,0.091899,0.084765,0.086228,0.07931,0.064237,0.075121,0.06481,0.067345,0.075273,0.067165,0.070605,0.073469,0.070806,0.072555,0.075853,0.073013,0.36944,0.38319,0.49911,0.2721,0.45726,0.43065,0.44587,0.19055,0.15239,0.23488,0.21766,0.25146,0.24128,0.23219,0.23286,0.29637,0.23865,0.17322,0.19203,0.08997,0.08597,0.086882,0.078185,0.06301,0.067213,0.070911,0.069566,0.08214,0.068209,0.073649,0.073763,0.072504,0.073721,0.073334,0.068288,0.067009,0.073803,0.45603,0.42925,0.45748,0.30621,0.2974,0.39872,0.35515,0.46592,0.42822,0.22357,0.22136,0.21961,0.23405,0.23032,0.21918,0.25584,0.27221,0.21806,0.21674,0.21051,0.071059,0.075402,0.065378,0.064624,0.068802,0.065598,0.06986,0.075493,0.072344,0.065795,0.070819,0.075419,0.07294,0.072964,0.071657,0.073044,0.082667,0.068526,0.36169,0.31377,0.42416,0.43237,0.35039,0.36116,0.43952,0.39319,0.42489,0.20381,0.23251,0.15678,0.15978,0.16342,0.16297,0.16929,0.18917,0.16664,0.18444,0.16195,0.070731,0.076636,0.069476,0.073756,0.075469,0.063537,0.072997,0.07412,0.07722,0.077004,0.065235,0.071138,0.068813,0.074405,0.068675,0.063536,0.075448,0.064639,0.30111,0.37365,0.41528,0.29617,0.32339,0.42159,0.2908,0.31722,0.4651,0.18379,0.18812,0.12939,0.17285,0.13639,0.18605,0.1306,0.19319,0.19367,0.18951,0.15348,0.063586,0.074076,0.075527,0.069006,0.066283,0.072426,0.073681,0.062289,0.07002,0.05832,0.0745,0.074878,0.077365,0.072677,0.073618,0.06857,0.073157,0.074502,0.39939,0.42638,0.39311,0.41301,0.38809,0.40057,0.39657,0.22068,0.29798,0.1

7601,0.1954,0.1654,0.15583,0.13894,0.14271,0.16742,0.15438,0.15767,0.14863,0.14003,0.070729,0.077508,0.070418,0.064612,0.073302,0.060832,0.071257,0.062466,0.069385,0.062257,0.061481,0.0738,0.063153,0.068379,0.068374,0.076823,0.083437,0.060116,0.35998,0.42071,0.43434,0.35265,0.37531,0.44244,0.22698,0.21319,0.18217,0.20686,0.20029,0.19555,0.13877,0.1919,0.15731,0.17031,0.18117,0.16357,0.10755,0.15101,0.069422,0.072498,0.068374,0.073676,0.072221,0.068,0.072925,0.060175,0.073038,0.069799,0.065239,0.071638,0.063292,0.071264,0.075676,0.075416,0.069125,0.067985,0.4032,0.39158,0.46418,0.43525,0.31651,0.20837,0.2179,0.18338,0.15761,0.2675,0.24668,0.17661,0.18445,0.22038,0.16022,0.16672,0.18973,0.1437,0.17678,0.16406,0.073558,0.065144,0.058178,0.067257,0.056429,0.070277,0.072624,0.065629,0.073578,0.059218,0.06976,0.074952,0.067566,0.074535,0.070731,0.061397,0.057205,0.071764,0.35614,0.30706,0.41114,0.22566,0.22523,0.20493,0.20255,0.24965,0.29111,0.19173,0.2379,0.22731,0.18393,0.12671,0.2003,0.20659,0.17182,0.13489,0.15764,0.20352,0.064722,0.075069,0.069377,0.077344,0.07507,0.083252,0.071115,0.074309,0.064934,0.066478,0.070391,0.076088,0.070579,0.074248,0.069838,0.067629,0.070969,0.072892,0.36903,0.18387,0.28497,0.20514,0.23646,0.23994,0.2389,0.25978,0.24045,0.18006,0.20536,0.14081,0.14705,0.19069,0.14962,0.19315,0.1223,0.21862,0.19083,0.065946,0.085178,0.082418,0.074244,0.083315,0.077098,0.068814,0.065026,0.08218,0.078017,0.067732,0.065946,0.063215,0.075475,0.072812,0.07491,0.074961,0.061627,0.26004,0.19241,0.29503,0.13737,0.19716,0.22794,0.22252,0.22986,0.17633,0.26427,0.16813,0.19423,0.17491,0.15704,0.13018,0.1493,0.17703,0.12974,0.15303,0.0766,0.069666,0.07549,0.07319,0.070576,0.064696,0.061135,0.061384,0.074946,0.068283,0.071622,0.078325,0.07574,0.07203,0.081509,0.070776,0.077327,0.058571,0.18289,0.19956,0.1805,0.24098,0.20658,0.18286,0.31143,0.20027,0.20714,0.2325,0.16003,0.19135,0.18078,0.16229,0.17187,0.16471,0.14969,0.15167,0.074996,0.065757,0.075191,0.074064,0.066957,0.075218,0.075531,0.076119,0.081859,0.069912,0.081092,0.072473,0.059553,0.075362,0.071229,0.069384,0.06517,0.066035,0.063446,0.23598,0.1943,0.21284,0.24432,0.27569,0.28574,0.16174,0.14127,0.20002,0.17859,0.18223,0.16809,0.16286,0.14692,0.14835,0.22639,0.14563,0.13319,0.059884,0.071692,0.066062,0.070891,0.07284,0.06967,0.06972,0.078714,0.085288,0.076925,0.079824,0.067443,0.079315,0.071685,0.077102,0.067916,0.06947,0.054619,0.055899,0.047908,0.13749,0.1996,0.21552,0.17754,0.18466,0.21529,0.20185,0.2092,0.20154,0.12363,0.18133,0.15968,0.16336,0.17948,0.17362,0.077781,0.070894,0.0693,0.068655,0.070098,0.07418,0.078674,0.066441,0.059156,0.07851,0.062794,0.069,0.063203,0.071377,0.071264,0.075484,0.077156,0.074932,0.050529,0.059425,0.055012,0.060986,0.17766,0.25802,0.16126,0.2244,0.22937,0.30198,0.20471,0.27439,0.2333,0.17225,0.20351,0.16053,0.072806,0.071505,0.074732,0.059776,0.070909,0.070465,0.075856,0.061777,0.068865,0.06901,0.063941,0.067694,0.067456,0.073877,0.065708,0.06896,0.062463,0.071191,0.064717,0.081946,0.061904,0.051497,0.054259,0.059923,0.053352,0.063325,0.23401,0.24674,0.25269,0.19429,0.13746,0.22443,0.27681,0.27177,0.078877,0.071103,0.074909,0.0753,0.068746,0.059694,0.068471,0.069791,0.070228,0.069154,0.071126,0.067808,0.06757,0.073934,0.076213,0.067723,0.065179,0.072578,0.066721,0.067343,0.076715,0.070402,0.073325,0.062921,0.060296,0.051087,0.055826,0.062067,0.059185,0.17989,0.21862,0.1915,0.19644,0.19944,0.054828,0.047494,0.073431,0.076131,0.063278,0.061741,0.07106,0.075888,0.063207,0.073524,0.070858,0.070429,0.086853,0.063988,0.06457,0.063419,0.068757,0.076483,0.073049,0.068762,0.073327,0.068444,0.0

70684,0.050678,0.051647,0.062776,0.056017,0.06382,0.053376,0.051144,0.056676,0.062175,0.048382,0.23535,0.209,0.064122,0.069326,0.051124,0.062724,0.074168,0.077299,0.060127,0.073755,0.060236,0.07024,0.071363,0.07246,0.065009,0.061406,0.071134,0.073233,0.069293,0.07087,0.068382,0.078199,0.074407,0.070516,0.069341,0.058957,0.057633,0.050974,0.051604,0.055611,0.062105,0.056257,0.04869,0.067197,0.049742,0.057987,0.059634,0.056094,0.053977,0.051531,0.051956,0.062679,0.067407,0.058927,0.082448,0.069327,0.074322,0.073698,0.072898,0.06234,0.070826,0.083746,0.079915,0.076878,0.075499,0.074301,0.070861,0.068468,0.065548,0.060974,0.053496,0.063068,0.056251,0.064354,0.051112,0.05547,0.059831,0.057496,0.064184,0.055518,0.049027,0.056828,0.061102,0.059251,0.047166,0.059918,0.055564,0.066489,0.077071,0.063912,0.066032,0.067024,0.063768,0.07332,0.073413,0.073709,0.059794,0.069145,0.069591,0.0719,0.045571,0.058049,0.050216,0.056865,0.05093,0.060744,0.062021,0.059726,0.053304,0.049194,0.057613,0.058586,0.055893,0.058633,0.060282,0.050675,0.067024,0.05619,0.055005,0.06365,0.059127,0.069419,0.071436,0.079054,0.071822,0.064889,0.06842,0.074389,0.065321,0.069175,0.058128,0.052074,0.05855,0.050454,0.062981,0.051461,0.062415,0.059886,0.053722,0.064614,0.057019,0.067168,0.05237,0.053139,0.055304,0.056232,0.049571,0.058982,0.061249,0.063797,0.052788,0.069589,0.06458,0.05096,0.058037,0.078902,0.080195,0.067751,0.07818,0.053756,0.046546,0.06066,0.053921,0.070061,0.054501,0.050357,0.057913,0.054198,0.064286,0.052387,0.065871,0.05764,0.057126,0.052135,0.066856,0.060588,0.063451,0.057833,0.056713,0.049015,0.053121,0.045382,0.050796,0.050235,0.058349,0.07056,0.057967,0.058311,0.06487,0.056353,0.055969,0.062328,0.053698,0.050905,0.055281,0.059034,0.049162,0.052404,0.049232,0.05579,0.065467,0.065535,0.055868,0.062334,0.04206,0.059224,0.045548,0.053565,0.044669,0.058745,0.06142,0.068759,0.060724,0.062603,0.058407,0.059596,0.063621,0.060028,0.058039,0.05911,0.05971,0.048272,0.058067,0.054427,0.048952,0.062058,0.051711,0.053632,0.058136,0.061384,0.059669,0.042746,0.056163,0.062774,0.051189,0.060518,0.051702,0.057531,0.067483,0.059895,0.057893,0.04855,0.048588,0.054837,0.053727,0.060452,0.061488,0.051781,0.051759,0.052122,0.053763,0.063843,0.063712,0.052505,0.054676,0.051294,0.06342,0.060794,0.047332,0.058256,0.061255,0.06245,0.047469,0.059604,0.055885,0.051909,0.062998,0.060859,0.059217,0.064919,0.058253,0.05559,0.064924,0.054087,0.063396,0.045221,0.062494,0.056242,0.051842,0.05989,0.059549,0.061477,0.053381,0.060223,0.047771,0.061922,0.067765,0.057861,0.064697,0.065442,0.055346,0.053079,0.060935,0.052181,0.0622,0.050586,0.043688,0.05097,0.069002,0.050496,0.068074,0.070592,0.067414,0.06319,0.054548,0.058226,0.056447,0.057031,0.053154,0.051942,0.062593,0.065224,0.05265,0.049347,0.059402,0.05917,0.045381,0.059669,0.050963,0.060929,0.058589,0.064094,0.066411,0.056739,0.063736,0.052242,0.064854,0.06306,0.061213,0.062902,0.056549,0.05634,0.068693,0.060546,0.05786,0.060231,0.062925,0.047221,0.04983,0.060007,0.052687,0.074126,0.05502,0.055493,0.047995,0.055409,0.059588,0.05122,0.050523,0.063208,0.054979,0.052629,0.061901,0.048964,0.083298,0.086653,0.078953,0.076206,0.06919,0.081536,0.076978,0.076829,0.098005,0.079613,0.086139,0.080007,0.07803,0.077191,0.086447,0.080894,0.077072,0.082164,0.082166,0.079766,0.20129,0.21536,0.29614,0.25479,0.081936,0.08535,0.077752,0.083547,0.085432,0.076665,0.083386,0.086859,0.077422,0.077945,0.077375,0.07919,0.078419,0.08465,0.068247,0.40351,0.25809,0.25585,0.13533,0.22574,0.21998,0.20328,0.080423,0.077391,0.079185,0.081153,0.080927,0.081694,0.08596,0.079415,0.092538,0.089586,0.0

90687,0.076015,0.081228,0.073679,0.078809,0.30821,0.31324,0.25759,0.20  
436,0.20486,0.23939,0.23024,0.20853,0.20822,0.26425,0.084405,0.085702,  
0.084502,0.084115,0.075804,0.087824,0.078025,0.082177,0.081101,0.08490  
6,0.076856,0.085392,0.089144,0.075414,0.073842,0.35363,0.38778,0.44593  
,0.24571,0.21785,0.2021,0.1818,0.19282,0.24139,0.23422,0.18574,0.20563  
,0.075729,0.080626,0.084129,0.082432,0.083683,0.077209,0.081666,0.0757  
01,0.076328,0.077344,0.075355,0.080201,0.085838,0.084595,0.083123,0.08  
3638,0.30625,0.34749,0.50234,0.38664,0.2277,0.22773,0.22706,0.24958,0.  
18764,0.18679,0.18157,0.20505,0.23124,0.17795,0.085761,0.07619,0.07906  
2,0.092793,0.080052,0.085863,0.076938,0.075765,0.082047,0.077384,0.073  
414,0.075252,0.077397,0.077053,0.082868,0.07922,0.33945,0.31872,0.4128  
6,0.37919,0.37849,0.2145,0.20093,0.19959,0.23393,0.26691,0.17655,0.173  
73,0.20274,0.17087,0.24884,0.24032,0.082526,0.081145,0.085087,0.074069  
,0.082033,0.08052,0.091256,0.07662,0.085842,0.079874,0.076914,0.079819  
,0.08746,0.072987,0.082565,0.076893,0.078552,0.35794,0.29574,0.42892,0.  
.42563,0.34146,0.25881,0.18328,0.22818,0.21549,0.22243,0.23366,0.18949  
,0.25849,0.21982,0.26449,0.27998,0.16858,0.076825,0.084834,0.08348,0.0  
81461,0.084617,0.080178,0.072508,0.075878,0.077754,0.084909,0.078751,0.  
.081348,0.084424,0.068065,0.071546,0.068028,0.07614,0.32404,0.34995,0.  
4659,0.48424,0.35269,0.42046,0.30917,0.17065,0.28246,0.24043,0.24204,0.  
.29317,0.26044,0.20241,0.26003,0.26427,0.2181,0.15588,0.08314,0.066437  
,0.088752,0.089363,0.08579,0.079136,0.078257,0.075342,0.078207,0.08677  
2,0.078649,0.069789,0.073644,0.063607,0.073313,0.066511,0.068556,0.087  
268,0.3451,0.51364,0.43391,0.32554,0.42313,0.45826,0.30755,0.16701,0.2  
1691,0.22836,0.28998,0.18072,0.2632,0.20636,0.18743,0.23534,0.19457,0.  
22295,0.07637,0.082376,0.078634,0.079691,0.083441,0.082728,0.078649,0.  
081384,0.07955,0.064207,0.059269,0.07223,0.065706,0.068822,0.071331,0.  
065243,0.07,0.065124,0.080464,0.35482,0.36257,0.28915,0.42488,0.32724,  
0.34076,0.4944,0.22936,0.26429,0.2069,0.1785,0.23547,0.2439,0.19489,0.  
18828,0.26582,0.17889,0.23439,0.24727,0.08255,0.080886,0.089102,0.0805  
6,0.085543,0.074847,0.060335,0.069529,0.0629,0.06744,0.071991,0.06401,  
0.067849,0.069196,0.0665,0.072951,0.068308,0.067897,0.36862,0.33187,0.  
47592,0.34301,0.45521,0.47704,0.42558,0.19574,0.19263,0.22905,0.20591,  
0.25545,0.22715,0.25274,0.21978,0.28713,0.24621,0.16129,0.21614,0.0916  
74,0.081426,0.08177,0.075656,0.061208,0.067855,0.070523,0.065021,0.079  
06,0.065736,0.072291,0.069125,0.068538,0.070038,0.074829,0.064363,0.06  
4125,0.071511,0.45041,0.46873,0.47371,0.35398,0.35804,0.405,0.39114,0.  
42543,0.4178,0.22322,0.21837,0.22352,0.21144,0.21504,0.20955,0.23226,0.  
.25819,0.22948,0.22792,0.21082,0.069705,0.07595,0.065033,0.062045,0.06  
7863,0.066404,0.072288,0.07353,0.069711,0.061871,0.069029,0.07222,0.06  
9204,0.066789,0.064597,0.072398,0.079232,0.066761,0.38264,0.31144,0.42  
099,0.3909,0.35723,0.32947,0.40517,0.3793,0.42513,0.21025,0.23215,0.16  
672,0.15792,0.17482,0.15465,0.15152,0.18355,0.15407,0.1903,0.17352,0.0  
68534,0.075527,0.071007,0.070735,0.072234,0.058757,0.071437,0.070224,0.  
.074142,0.071353,0.066149,0.069742,0.063293,0.0699,0.065384,0.058843,0.  
.073871,0.062169,0.33168,0.36455,0.40642,0.32482,0.33964,0.39199,0.288  
2,0.32121,0.44986,0.17979,0.18513,0.12923,0.17562,0.12692,0.19456,0.14  
179,0.17391,0.1952,0.18698,0.14231,0.058391,0.071512,0.074412,0.065787  
,0.063738,0.065335,0.071465,0.059043,0.067133,0.061467,0.07182,0.07090  
7,0.07421,0.072823,0.068818,0.064302,0.070944,0.067124,0.39906,0.47428  
,0.41199,0.39845,0.38019,0.36008,0.4106,0.23256,0.30201,0.17762,0.1759  
8,0.16012,0.15339,0.13521,0.14551,0.15152,0.15231,0.1618,0.15442,0.137

72,0.071719,0.074291,0.066581,0.064803,0.07056,0.057018,0.067874,0.059  
97,0.068399,0.060866,0.058032,0.070523,0.06163,0.068797,0.062835,0.076  
844,0.081818,0.061849,0.35439,0.40964,0.41485,0.3996,0.37326,0.4339,0.  
21025,0.193,0.18172,0.1981,0.21113,0.20585,0.13675,0.19689,0.14655,0.1  
755,0.17466,0.16256,0.12189,0.14999,0.067272,0.068633,0.060739,0.06957  
9,0.069537,0.062676,0.073563,0.056277,0.072582,0.067535,0.062124,0.068  
197,0.061102,0.06866,0.07064,0.070336,0.068864,0.065532,0.41754,0.4010  
7,0.42703,0.44238,0.36107,0.21817,0.20548,0.18394,0.16923,0.25618,0.25  
053,0.16088,0.18207,0.22219,0.15167,0.17435,0.18971,0.14072,0.16755,0.  
16723,0.071371,0.065322,0.052852,0.064708,0.057302,0.07268,0.068139,0.  
061844,0.068544,0.059602,0.063027,0.072113,0.068265,0.071963,0.067849,  
0.060619,0.053982,0.07197,0.30542,0.31949,0.39741,0.22469,0.25129,0.17  
265,0.19675,0.24793,0.29926,0.18307,0.23744,0.22206,0.17567,0.13123,0.  
20139,0.20511,0.16748,0.13093,0.14821,0.20609,0.064646,0.076978,0.0677  
07,0.071871,0.072974,0.07725,0.071542,0.073932,0.062876,0.064804,0.067  
686,0.073179,0.067891,0.070609,0.068589,0.071444,0.066575,0.066532,0.3  
9546,0.17716,0.25183,0.20903,0.24414,0.22395,0.22303,0.26156,0.25126,0  
.19311,0.21294,0.13107,0.1537,0.19828,0.14853,0.19205,0.12451,0.1976,0  
.17431,0.061766,0.083278,0.078701,0.06991,0.079867,0.075087,0.066915,0  
.062858,0.076813,0.074071,0.06621,0.064546,0.060364,0.073167,0.067334,  
0.074291,0.072923,0.058106,0.25288,0.18072,0.28642,0.14299,0.20725,0.2  
2262,0.24217,0.23154,0.18281,0.25691,0.18077,0.17457,0.17455,0.16799,0  
.12346,0.14401,0.18901,0.12358,0.1485,0.0729,0.068101,0.071778,0.06911  
3,0.06606,0.063894,0.062281,0.061997,0.072705,0.066281,0.065804,0.0738  
77,0.076927,0.068511,0.075976,0.068959,0.076184,0.057921,0.17843,0.183  
79,0.17585,0.23155,0.20194,0.18918,0.3177,0.20798,0.22043,0.23635,0.15  
754,0.1831,0.17922,0.15985,0.17412,0.18278,0.14319,0.14174,0.071024,0.  
066728,0.069677,0.070024,0.062943,0.074622,0.075092,0.069118,0.080973,  
0.068364,0.077376,0.072977,0.058125,0.070645,0.068268,0.06604,0.060041  
,0.062136,0.062945,0.2202,0.18949,0.21293,0.23171,0.24769,0.2687,0.161  
17,0.14632,0.20287,0.18683,0.1992,0.15899,0.16307,0.14427,0.15165,0.19  
32,0.14923,0.12677,0.060661,0.066956,0.06398,0.070373,0.074235,0.06734  
7,0.06655,0.078036,0.079912,0.074214,0.079583,0.066312,0.075469,0.0669  
21,0.072171,0.064934,0.068541,0.046027,0.055271,0.043676,0.13501,0.200  
72,0.21109,0.18404,0.18126,0.21688,0.19325,0.20993,0.21168,0.12882,0.1  
5852,0.15182,0.16423,0.16016,0.16435,0.075886,0.070841,0.063013,0.0656  
2,0.068475,0.070763,0.077403,0.063407,0.057861,0.076897,0.059243,0.067  
826,0.063134,0.06879,0.069614,0.073083,0.074749,0.073184,0.052445,0.05  
9406,0.053616,0.060052,0.16894,0.23762,0.17208,0.19687,0.23108,0.27645  
,0.21023,0.26175,0.2284,0.18438,0.1963,0.16386,0.069911,0.065443,0.076  
192,0.0587,0.068312,0.068775,0.074609,0.058872,0.063304,0.062506,0.066  
377,0.065235,0.06509,0.07541,0.065402,0.06946,0.062476,0.069406,0.0645  
79,0.081126,0.05655,0.054073,0.049188,0.057145,0.048975,0.059178,0.229  
6,0.24744,0.2444,0.19851,0.14199,0.22796,0.28371,0.24848,0.073441,0.06  
7142,0.072948,0.07299,0.069333,0.059953,0.06387,0.066198,0.063455,0.06  
5294,0.069507,0.06175,0.065574,0.070891,0.071792,0.065354,0.063356,0.0  
6701,0.060819,0.062837,0.074698,0.065595,0.071115,0.061194,0.059668,0.  
054846,0.053947,0.061737,0.059309,0.19048,0.22262,0.19936,0.18906,0.17  
704,0.053562,0.048021,0.069507,0.070345,0.061085,0.056533,0.072688,0.0  
73345,0.065297,0.06851,0.067864,0.067474,0.079857,0.06172,0.065689,0.0  
58571,0.06522,0.072304,0.071927,0.066473,0.07317,0.065557,0.067285,0.0  
50252,0.047799,0.061875,0.060105,0.067082,0.053353,0.050128,0.057652,0



.059242,0.050015,0.23336,0.21307,0.057082,0.071145,0.05251,0.060592,0.070168,0.074397,0.058001,0.070824,0.057326,0.069928,0.066019,0.071337,0.063001,0.056773,0.070549,0.069419,0.066733,0.066201,0.062481,0.076062,0.070041,0.070404,0.068403,0.059221,0.056025,0.052185,0.048087,0.053412,0.05534,0.05446,0.049131,0.064818,0.053535,0.055529,0.060459,0.051969,0.049241,0.055116,0.054383,0.059551,0.062065,0.054455,0.081184,0.067377,0.074444,0.075461,0.069569,0.064611,0.069242,0.078787,0.075257,0.073752,0.072108,0.068596,0.068954,0.06634,0.069992,0.056851,0.054803,0.063128,0.054849,0.06005,0.05198,0.052805,0.050921,0.058754,0.060106,0.057049,0.049291,0.057029,0.056364,0.05972,0.049126,0.057117,0.052158,0.065107,0.071906,0.065032,0.065755,0.065753,0.060653,0.072078,0.068513,0.072523,0.060232,0.067517,0.065885,0.067557,0.047217,0.058713,0.051019,0.056548,0.047197,0.056883,0.059509,0.064523,0.052179,0.048611,0.056717,0.061512,0.053605,0.049735,0.051596,0.051139,0.068036,0.053302,0.0533,0.062051,0.056595,0.066587,0.07007,0.074496,0.069526,0.059722,0.065327,0.074005,0.063643,0.065484,0.059047,0.050859,0.059183,0.048415,0.05938,0.047172,0.063854,0.05999,0.049807,0.0646,0.056982,0.064706,0.056046,0.048515,0.057134,0.060481,0.047076,0.062005,0.057758,0.062306,0.053744,0.069661,0.065536,0.04959,0.05273,0.079429,0.075421,0.065602,0.076098,0.050041,0.04462,0.059809,0.051295,0.067075,0.055457,0.046659,0.055993,0.050828,0.064666,0.052261,0.064158,0.056232,0.059517,0.050739,0.063205,0.058112,0.058179,0.055496,0.057019,0.046442,0.050335,0.049723,0.051386,0.048722,0.05555,0.069166,0.058235,0.056875,0.064797,0.058553,0.051664,0.059686,0.053592,0.048562,0.051141,0.061534,0.050877,0.05032,0.05286,0.052473,0.066913,0.064759,0.052514,0.057768,0.040725,0.057549,0.045625,0.051244,0.043863,0.055581,0.059539,0.064484,0.056327,0.063059,0.05827,0.058511,0.06269,0.060896,0.056878,0.052843,0.060923,0.04744,0.060276,0.050713,0.047872,0.060297,0.052644,0.05541,0.057614,0.064234,0.056737,0.043275,0.054811,0.057529,0.048467,0.061314,0.052275,0.0584,0.065436,0.058652,0.055723,0.045027,0.053296,0.051017,0.050703,0.058634,0.058372,0.048379,0.054089,0.052777,0.048291,0.065677,0.060176,0.055232,0.052844,0.047014,0.060268,0.053971,0.04907,0.058909,0.057076,0.060418,0.041686,0.054355,0.054602,0.052835,0.060132,0.058903,0.058564,0.061108,0.058601,0.058456,0.061609,0.051976,0.063472,0.047816,0.058193,0.052936,0.056,0.058896,0.059926,0.059994,0.050839,0.057166,0.052259,0.056265,0.06694,0.056727,0.063329,0.064888,0.053956,0.050269,0.065355,0.05559,0.05978,0.054417,0.043555,0.049891,0.069634,0.04868,0.065047,0.068994,0.064275,0.064826,0.055027,0.057262,0.054352,0.053842,0.051168,0.05404,0.062346,0.066826,0.05748,0.044814,0.058524,0.055481,0.043547,0.060195,0.050962,0.058875,0.05606,0.06543,0.064338,0.054702,0.066786,0.053233,0.057203,0.064142,0.061378,0.062113,0.060304,0.052341,0.068009,0.060769,0.05832,0.057307,0.060645,0.047671,0.045618,0.05893,0.053803,0.072188,0.050648,0.054014,0.049569,0.05591,0.055532,0.049818,0.051207,0.061278,0.051077,0.057532,0.061335,0.046435,0.083329,0.081502,0.077028,0.075993,0.068026,0.078595,0.078943,0.075492,0.091249,0.07941,0.08395,0.078444,0.073015,0.077024,0.080619,0.080701,0.071859,0.077452,0.08204,0.074698,0.20032,0.19205,0.30445,0.24578,0.080474,0.084466,0.078157,0.080046,0.082897,0.07591,0.078189,0.082665,0.074115,0.076885,0.076683,0.079602,0.077257,0.082445,0.065246,0.37067,0.23947,0.26756,0.13312,0.22935,0.24454,0.1943,0.075752,0.073344,0.075035,0.079375,0.078917,0.074964,0.08163,0.07441,0.088962,0.084707,0.08454,0.07643,0.078593,0.071062,0.076971,0.31841,0.31401,0.24315,0.21395

,0.20314,0.22384,0.22135,0.20907,0.21071,0.27231,0.082841,0.083383,0.080762,0.081155,0.071397,0.085117,0.072365,0.078485,0.076917,0.082914,0.074144,0.080491,0.086148,0.07371,0.070329,0.36994,0.39203,0.45755,0.21805,0.20029,0.20128,0.17194,0.21279,0.25189,0.23122,0.19603,0.20768,0.074248,0.077242,0.08348,0.081575,0.078807,0.074978,0.077881,0.070806,0.072745,0.07521,0.069307,0.075305,0.084084,0.083845,0.080835,0.082977,0.30598,0.37322,0.46033,0.39849,0.22721,0.22251,0.22214,0.21953,0.18474,0.17099,0.19632,0.20962,0.21826,0.18147,0.082041,0.072119,0.074572,0.091466,0.076973,0.085266,0.075128,0.071243,0.077597,0.076311,0.068172,0.072749,0.075178,0.073395,0.07987,0.076565,0.29529,0.36584,0.39303,0.3435,0.38806,0.20617,0.1921,0.18899,0.22801,0.26861,0.1941,0.19272,0.18212,0.17949,0.24969,0.21556,0.082082,0.07691,0.082581,0.071863,0.08028,0.077028,0.08954,0.072338,0.083268,0.078282,0.072812,0.076512,0.083182,0.07354,0.082937,0.072462,0.075271,0.36282,0.26942,0.44795,0.45383,0.36149,0.28468,0.16242,0.22605,0.2201,0.21654,0.21798,0.18571,0.25756,0.22943,0.22369,0.27641,0.2032,0.07469,0.080584,0.083803,0.078423,0.08219,0.079141,0.068645,0.074436,0.075907,0.082137,0.075481,0.081139,0.07937,0.066748,0.071299,0.064137,0.072009,0.29007,0.35029,0.4149,0.4947,0.34215,0.40852,0.33007,0.19682,0.27241,0.24369,0.22385,0.27879,0.24104,0.20535,0.24995,0.24939,0.22779,0.15156,0.079623,0.064235,0.086891,0.085655,0.081235,0.07433,0.077377,0.074049,0.074887,0.086814,0.078771,0.070341,0.072238,0.063306,0.068663,0.063598,0.069425,0.0857,0.35974,0.46886,0.43884,0.31996,0.43903,0.4801,0.31262,0.18971,0.23067,0.2409,0.28652,0.18002,0.25691,0.20992,0.1853,0.20967,0.19644,0.22644,0.077043,0.078075,0.077964,0.078665,0.080953,0.078257,0.076718,0.076986,0.075444,0.067225,0.060258,0.069029,0.064162,0.068816,0.071063,0.06339,0.068933,0.063505,0.076877,0.37245,0.36854,0.29104,0.40979,0.35313,0.31752,0.46985,0.23561,0.26133,0.20624,0.17556,0.21237,0.23711,0.19124,0.19622,0.23028,0.16443,0.24553,0.26662,0.07725,0.076278,0.087189,0.080632,0.085155,0.07614,0.059189,0.065212,0.05904,0.065121,0.070411,0.066167,0.064059,0.068223,0.066359,0.071906,0.063455,0.063921,0.33713,0.35189,0.48733,0.37509,0.50684,0.48864,0.43604,0.18413,0.17662,0.22373,0.23489,0.24166,0.2295,0.27793,0.21977,0.2764,0.23398,0.16237,0.21681,0.086479,0.075539,0.081117,0.073072,0.062796,0.063395,0.066441,0.064669,0.077465,0.062086,0.073153,0.06655,0.068156,0.06899,0.074072,0.061029,0.061274,0.070255,0.44144,0.42876,0.44517,0.33468,0.31961,0.39552,0.40286,0.44109,0.38975,0.21065,0.23973,0.19907,0.22282,0.20443,0.22889,0.22641,0.27434,0.23377,0.22486,0.20357,0.064937,0.076693,0.065465,0.060169,0.067901,0.065181,0.072481,0.075247,0.066826,0.056724,0.068828,0.071491,0.06258,0.069575,0.064707,0.071118,0.074192,0.062178,0.38529,0.2685,0.39139,0.37205,0.33281,0.36958,0.38785,0.377,0.43847,0.22391,0.22641,0.1689,0.15645,0.178,0.16185,0.16003,0.17571,0.14851,0.18586,0.18122,0.069145,0.070072,0.070811,0.069818,0.069389,0.060796,0.070435,0.072539,0.069702,0.068427,0.061478,0.068393,0.061346,0.064712,0.063946,0.062089,0.071344,0.061688,0.30115,0.35565,0.39534,0.29605,0.30329,0.3835,0.29516,0.36874,0.45211,0.18087,0.18142,0.12478,0.1789,0.12411,0.18766,0.1285,0.16264,0.20266,0.17863,0.13583,0.055397,0.06712,0.073834,0.062987,0.063014,0.06481,0.070176,0.057217,0.062226,0.063221,0.069592,0.071792,0.073392,0.070167,0.065428,0.060433,0.068367,0.065139,0.39798,0.45296,0.38444,0.39615,0.37148,0.38536,0.43432,0.2146,0.27045,0.18522,0.16745,0.16353,0.15007,0.13884,0.14192,0.14494,0.15154,0.15799,0.15545,0.14012,0.07034,0.069579,0.063066,0.065803,0.069796,0.058162,0.06909

3,0.05952,0.065175,0.060724,0.055283,0.068067,0.060693,0.065148,0.0597  
49,0.073939,0.079129,0.061284,0.38055,0.36562,0.3585,0.43634,0.41204,0  
.42016,0.21723,0.18797,0.14477,0.22395,0.1954,0.1929,0.13981,0.18886,0  
.1371,0.17225,0.16422,0.17437,0.12847,0.14741,0.063036,0.065031,0.0613  
4,0.07011,0.067939,0.061476,0.068945,0.059027,0.071778,0.061269,0.0628  
91,0.067632,0.059959,0.069086,0.070601,0.065901,0.067966,0.062345,0.45  
807,0.35038,0.40939,0.42216,0.35028,0.21731,0.17493,0.17076,0.1742,0.2  
3801,0.25453,0.17038,0.18601,0.20921,0.15865,0.17963,0.19254,0.13999,0  
.16177,0.16792,0.06702,0.065182,0.052796,0.059093,0.0563,0.071616,0.06  
6824,0.065601,0.064529,0.057399,0.062372,0.073414,0.064712,0.069597,0.  
062478,0.060037,0.0536,0.069401,0.34384,0.32729,0.39363,0.24247,0.2688  
9,0.17397,0.17504,0.25886,0.27581,0.16314,0.22087,0.22672,0.18197,0.13  
767,0.17354,0.19829,0.16175,0.14352,0.16292,0.19028,0.066511,0.076211,  
0.065283,0.069939,0.070839,0.075866,0.072064,0.064761,0.058636,0.06197  
3,0.0661,0.070611,0.073947,0.067941,0.063392,0.070844,0.064853,0.06369  
7,0.40243,0.1877,0.25427,0.2131,0.25083,0.22065,0.20481,0.27265,0.2390  
4,0.18666,0.20475,0.12029,0.14465,0.20649,0.15251,0.18014,0.12491,0.19  
988,0.14829,0.057783,0.080952,0.078034,0.067717,0.077841,0.070871,0.06  
9033,0.057319,0.072329,0.06881,0.064847,0.060877,0.058111,0.072184,0.0  
64162,0.072581,0.072965,0.056094,0.23697,0.16537,0.26616,0.1245,0.1974  
9,0.21854,0.25815,0.22919,0.16541,0.23806,0.19561,0.17234,0.18397,0.17  
47,0.12549,0.14332,0.16587,0.12934,0.14109,0.06966,0.06773,0.07105,0.0  
66224,0.066612,0.061659,0.058612,0.063413,0.072124,0.065427,0.061802,0  
.072606,0.075747,0.066804,0.073267,0.068899,0.072233,0.05429,0.17466,0  
.17727,0.16478,0.214,0.20701,0.18439,0.29462,0.20927,0.21917,0.25564,0  
.16138,0.1827,0.1794,0.14401,0.1619,0.17828,0.14918,0.13762,0.063869,0  
.063817,0.067412,0.065668,0.061621,0.07345,0.073913,0.060741,0.07793,0  
.06254,0.076703,0.072487,0.056408,0.069376,0.063318,0.061419,0.060857,  
0.061116,0.063438,0.17395,0.18855,0.20996,0.21436,0.24163,0.24075,0.14  
721,0.14316,0.18564,0.18507,0.18188,0.14808,0.14584,0.13994,0.14892,0.  
19265,0.15301,0.12464,0.060591,0.067721,0.063384,0.068709,0.075949,0.0  
65505,0.067545,0.071157,0.076227,0.069848,0.07065,0.062194,0.076364,0.  
064449,0.070191,0.062724,0.063213,0.049373,0.054314,0.04038,0.14739,0.  
22753,0.21642,0.1746,0.18944,0.19362,0.21341,0.19422,0.22701,0.13965,0  
.16341,0.15904,0.14661,0.15569,0.16744,0.07423,0.069276,0.06013,0.0625  
1,0.065951,0.072524,0.075222,0.06005,0.055421,0.076293,0.055986,0.0660  
04,0.063777,0.066411,0.069046,0.070443,0.071889,0.070055,0.052922,0.05  
4652,0.053009,0.059865,0.17392,0.24336,0.19159,0.19646,0.22945,0.27664  
,0.22849,0.2561,0.23845,0.19175,0.18873,0.17106,0.066489,0.065574,0.07  
378,0.056574,0.067351,0.068987,0.073242,0.05493,0.062498,0.062424,0.06  
4916,0.064021,0.0624,0.074774,0.066776,0.07189,0.059783,0.065407,0.068  
258,0.075553,0.050258,0.058219,0.049239,0.061295,0.048138,0.053829,0.1  
8126,0.24891,0.21747,0.21131,0.14294,0.22731,0.27847,0.2386,0.071704,0  
.063134,0.065748,0.071526,0.067023,0.057273,0.059863,0.066235,0.06348,  
0.062785,0.066338,0.058608,0.065544,0.061983,0.070851,0.06343,0.063414  
,0.06499,0.059287,0.061885,0.073145,0.065114,0.070575,0.05784,0.062822  
,0.054473,0.054093,0.059274,0.052407,0.18407,0.222,0.20994,0.18136,0.1  
8723,0.049454,0.047723,0.067762,0.069593,0.055327,0.058901,0.070149,0.  
072356,0.063845,0.067214,0.060229,0.06177,0.078526,0.063411,0.061766,0  
.055434,0.064562,0.069321,0.067679,0.066362,0.068758,0.065137,0.068426  
,0.050225,0.045961,0.058152,0.060339,0.066205,0.051455,0.049886,0.0561  
08,0.060734,0.049405,0.22494,0.24023,0.056977,0.069384,0.051665,0.0605

98,0.06818,0.070842,0.054944,0.068037,0.059076,0.067322,0.065658,0.071  
061,0.061465,0.05599,0.071217,0.065268,0.065895,0.069814,0.061444,0.07  
069,0.071065,0.070312,0.068848,0.055544,0.053687,0.04651,0.048078,0.05  
3038,0.05574,0.050743,0.048507,0.063962,0.055636,0.058792,0.059854,0.0  
50905,0.045093,0.054986,0.052405,0.057244,0.058868,0.052989,0.073687,0  
.065477,0.070181,0.07306,0.069394,0.060694,0.06539,0.078873,0.07349,0.  
070364,0.065629,0.068738,0.066942,0.063524,0.064327,0.057697,0.053788,  
0.061092,0.052439,0.060431,0.054659,0.054543,0.050911,0.057838,0.05686  
,0.058334,0.048013,0.057324,0.055836,0.0573,0.048029,0.058823,0.049598  
,0.062203,0.068657,0.062473,0.059286,0.064434,0.06311,0.07136,0.063112  
,0.070225,0.051926,0.062981,0.063313,0.065157,0.045466,0.057284,0.0489  
04,0.05238,0.046937,0.05394,0.063467,0.057281,0.051324,0.051616,0.0549  
64,0.060356,0.056424,0.05294,0.05162,0.053948,0.065594,0.050157,0.0536  
71,0.059847,0.054524,0.064916,0.069234,0.073389,0.066671,0.057976,0.06  
4194,0.070326,0.060326,0.066256,0.057197,0.047458,0.055995,0.050974,0.  
058849,0.051942,0.062797,0.055643,0.051917,0.061501,0.05923,0.06162,0.  
053232,0.043675,0.051139,0.060839,0.04665,0.060627,0.057435,0.061178,0  
.053041,0.067487,0.067224,0.048278,0.055272,0.072782,0.071969,0.060743  
,0.07251,0.051715,0.047948,0.058276,0.049226,0.063138,0.058434,0.04769  
8,0.051658,0.050059,0.065198,0.048158,0.062542,0.052927,0.058063,0.051  
751,0.064583,0.061336,0.056698,0.053992,0.054779,0.045563,0.052677,0.0  
50528,0.04964,0.047847,0.050682,0.067209,0.054806,0.058484,0.066237,0.  
053855,0.050871,0.059081,0.047756,0.05009,0.049729,0.060532,0.053785,0  
.045514,0.050601,0.05145,0.068313,0.063068,0.053526,0.059044,0.045958,  
0.053431,0.048662,0.052901,0.041903,0.052061,0.057293,0.067929,0.05446  
9,0.057975,0.056299,0.058454,0.061853,0.060361,0.059161,0.053028,0.058  
693,0.049032,0.060772,0.05072,0.049721,0.057846,0.052883,0.05614,0.056  
973,0.062307,0.052546,0.042547,0.051194,0.057601,0.0471,0.059641,0.053  
362,0.059281,0.068133,0.059498,0.053789,0.047347,0.056708,0.050508,0.0  
50465,0.055576,0.057116,0.051558,0.054734,0.052778,0.048559,0.064852,0  
.06232,0.051968,0.049485,0.042705,0.059189,0.052688,0.051583,0.051895,  
0.05689,0.059537,0.040022,0.054264,0.052398,0.050871,0.0533,0.055082,0  
.059454,0.056042,0.056995,0.062406,0.061924,0.054908,0.062938,0.053109  
,0.055225,0.053729,0.057977,0.057729,0.061774,0.062283,0.050486,0.0593  
4,0.051535,0.054428,0.064162,0.049769,0.063784,0.06562,0.051185,0.0521  
09,0.063132,0.056323,0.056731,0.052835,0.047389,0.051842,0.063794,0.04  
9247,0.064442,0.068435,0.064172,0.058106,0.057165,0.059649,0.055356,0.  
055024,0.048001,0.049991,0.055886,0.066345,0.054338,0.04736,0.053262,0  
.055203,0.047963,0.063149,0.050533,0.057183,0.057097,0.061382,0.056676  
,0.051211,0.062723,0.051625,0.054589,0.061346,0.058136,0.059009,0.0558  
06,0.055995,0.063635,0.060123,0.059337,0.054495,0.056428,0.047282,0.05  
0373,0.058043,0.052182,0.068774,0.052404,0.04781,0.050644,0.057782,0.0  
52714,0.049488,0.052541,0.058381,0.052057,0.058259,0.058707,0.049499  
0.078655,0.080737,0.074975,0.074504,0.067166,0.074444,0.075946,0.07436  
3,0.085858,0.07792,0.082262,0.075713,0.067718,0.074334,0.080113,0.0771  
04,0.068633,0.07512,0.076414,0.074295,0.18312,0.18613,0.31423,0.25519,  
0.077959,0.083511,0.073255,0.074883,0.079654,0.073686,0.077619,0.08317  
5,0.072892,0.074913,0.075362,0.075882,0.073813,0.079538,0.060736,0.395  
55,0.23916,0.25771,0.14653,0.24652,0.21136,0.1832,0.074611,0.074757,0.  
07016,0.079181,0.079321,0.073616,0.077167,0.071533,0.085219,0.081378,0  
.082869,0.072183,0.077253,0.071295,0.077111,0.29555,0.31057,0.22528,0.  
22302,0.19644,0.25699,0.22619,0.20998,0.20487,0.2604,0.079935,0.078687

,0.077959,0.077982,0.068137,0.083718,0.06947,0.076028,0.072449,0.07954  
4,0.072017,0.078841,0.085261,0.073178,0.067299,0.36722,0.42051,0.40695  
,0.20627,0.2161,0.20913,0.17676,0.23322,0.24201,0.23154,0.2012,0.20596  
,0.072189,0.075302,0.08274,0.077116,0.076354,0.074298,0.078177,0.06902  
8,0.072653,0.074452,0.067269,0.073323,0.081473,0.079679,0.074408,0.081  
01,0.34496,0.38593,0.4438,0.37731,0.24561,0.21284,0.25495,0.20132,0.17  
179,0.19442,0.21239,0.21616,0.2073,0.19618,0.078155,0.070306,0.070416,  
0.088954,0.076311,0.085462,0.071215,0.06932,0.076707,0.074995,0.070098  
,0.070371,0.078188,0.07145,0.077894,0.074343,0.30614,0.37247,0.3632,0.  
32584,0.35641,0.20946,0.17899,0.19404,0.2212,0.26229,0.17715,0.19517,0  
.17357,0.18423,0.23316,0.18578,0.079978,0.075749,0.083308,0.06689,0.07  
7158,0.074994,0.084887,0.071102,0.080703,0.079041,0.072812,0.07494,0.0  
81492,0.075572,0.081702,0.070864,0.07339,0.34888,0.26044,0.45961,0.483  
8,0.36594,0.27686,0.18563,0.21904,0.19532,0.19763,0.23853,0.19861,0.25  
738,0.23929,0.2274,0.27887,0.23045,0.07232,0.079962,0.082253,0.079593,  
0.081051,0.07798,0.063401,0.070299,0.077306,0.07905,0.071716,0.080623,  
0.076025,0.064558,0.067935,0.065963,0.069171,0.29088,0.37305,0.39001,0  
.48932,0.30697,0.37246,0.31605,0.20931,0.23531,0.23728,0.21634,0.28317  
,0.24461,0.21246,0.23443,0.24526,0.2149,0.15051,0.080544,0.063025,0.08  
3034,0.083677,0.079798,0.072445,0.07166,0.071282,0.07339,0.082829,0.07  
6898,0.071711,0.074862,0.055852,0.068875,0.06387,0.067694,0.07687,0.32  
932,0.45976,0.43297,0.2765,0.43084,0.49885,0.31013,0.2104,0.22866,0.23  
367,0.28307,0.19501,0.24646,0.19925,0.17917,0.21191,0.20137,0.21424,0.  
074254,0.075212,0.075267,0.074853,0.078583,0.076751,0.071903,0.075733,  
0.071731,0.066588,0.05799,0.06983,0.061485,0.066461,0.069783,0.060319,  
0.067798,0.061081,0.076476,0.36836,0.35994,0.32952,0.41733,0.33542,0.2  
9539,0.43289,0.21954,0.23608,0.2175,0.17685,0.19609,0.22674,0.20122,0.  
17049,0.24121,0.14727,0.2506,0.25878,0.073067,0.071349,0.084597,0.0751  
43,0.085003,0.072519,0.058,0.065828,0.059202,0.063177,0.064908,0.06563  
8,0.064157,0.068118,0.063635,0.070665,0.060243,0.063938,0.37674,0.3574  
9,0.49692,0.34999,0.48517,0.4592,0.45867,0.19853,0.18167,0.22399,0.229  
31,0.23212,0.23223,0.25936,0.20055,0.25442,0.21035,0.15371,0.22192,0.0  
83157,0.072044,0.079601,0.071302,0.060774,0.060298,0.06732,0.064103,0.  
074607,0.059231,0.072552,0.069225,0.064689,0.067951,0.072381,0.064755,  
0.066645,0.067076,0.43923,0.38015,0.41586,0.37104,0.29634,0.40813,0.34  
889,0.43572,0.34908,0.2138,0.24658,0.17662,0.21698,0.20336,0.22707,0.2  
1203,0.26932,0.23765,0.22483,0.20323,0.064973,0.076383,0.066134,0.0614  
16,0.067066,0.061861,0.070873,0.071917,0.065145,0.058163,0.065922,0.07  
1037,0.061101,0.069485,0.065794,0.069815,0.073639,0.065086,0.37568,0.2  
7159,0.4238,0.37889,0.28487,0.34765,0.40542,0.37497,0.4096,0.22706,0.2  
2725,0.16279,0.13625,0.19306,0.16393,0.15464,0.18425,0.14482,0.18827,0.  
.19648,0.069126,0.065039,0.068251,0.067851,0.068749,0.059183,0.068711,  
0.071682,0.070317,0.06654,0.063041,0.069523,0.060876,0.066316,0.066837  
,0.061105,0.069062,0.063987,0.29986,0.36635,0.39197,0.27865,0.31908,0.  
3648,0.27052,0.36084,0.46859,0.17755,0.18045,0.11612,0.1788,0.11647,0.  
18502,0.15581,0.16323,0.1877,0.16496,0.12009,0.054591,0.066861,0.0738,  
0.062709,0.058681,0.062653,0.068094,0.056413,0.062066,0.062567,0.06783  
5,0.069475,0.069958,0.069034,0.064512,0.057663,0.068299,0.06178,0.3448  
7,0.47089,0.41607,0.39267,0.37323,0.39502,0.40244,0.2124,0.26737,0.179  
53,0.18334,0.16186,0.13253,0.12797,0.14347,0.1449,0.15587,0.15398,0.14  
931,0.14982,0.069735,0.068239,0.062368,0.066333,0.069676,0.055964,0.07  
0417,0.062347,0.065705,0.061124,0.056364,0.066395,0.062437,0.063508,0.

061525,0.073844,0.075107,0.06135,0.32698,0.34908,0.32839,0.41436,0.395  
05,0.39737,0.20873,0.18629,0.11849,0.22703,0.20209,0.20806,0.14887,0.1  
7239,0.14833,0.15512,0.16393,0.18067,0.13607,0.14452,0.061416,0.06292,  
0.062151,0.071651,0.065189,0.063394,0.064665,0.056749,0.068346,0.06087  
9,0.063856,0.06599,0.061815,0.069994,0.070035,0.06044,0.06651,0.06246,  
0.46326,0.36294,0.38616,0.37265,0.34191,0.22994,0.19091,0.1813,0.1793,  
0.2357,0.23625,0.16105,0.17208,0.19247,0.1566,0.18004,0.19637,0.14393,  
0.16809,0.16015,0.066279,0.065249,0.058994,0.061139,0.054684,0.069006,  
0.067511,0.066223,0.062236,0.054248,0.061093,0.071258,0.061463,0.06696  
6,0.05787,0.056523,0.052422,0.068935,0.33007,0.31974,0.37692,0.23325,0  
.24938,0.17638,0.19593,0.25749,0.26356,0.16836,0.22072,0.2268,0.18965,  
0.14016,0.16113,0.19298,0.16118,0.14839,0.16881,0.17327,0.065701,0.071  
862,0.063189,0.069616,0.066723,0.072987,0.071056,0.065469,0.060424,0.0  
6305,0.061751,0.069814,0.070543,0.063589,0.060162,0.067555,0.066611,0.  
060866,0.3917,0.19443,0.30103,0.21677,0.27007,0.2233,0.20011,0.27008,0  
.23524,0.18852,0.20521,0.11958,0.14384,0.193,0.14261,0.17629,0.11628,0  
.20983,0.16234,0.057654,0.077882,0.076855,0.065709,0.077783,0.067848,0  
.069019,0.053763,0.071886,0.064466,0.062359,0.059608,0.060118,0.072501  
,0.061247,0.070307,0.07385,0.054266,0.24863,0.1693,0.27801,0.14264,0.1  
7718,0.23252,0.26974,0.2299,0.15308,0.24137,0.18056,0.17709,0.17823,0.  
17403,0.12687,0.13834,0.15138,0.13085,0.13923,0.066603,0.067415,0.0707  
44,0.063221,0.062952,0.06114,0.054753,0.060287,0.07187,0.066911,0.0583  
75,0.074324,0.067892,0.069502,0.072741,0.068961,0.064615,0.056244,0.16  
103,0.16054,0.1621,0.20076,0.1938,0.17461,0.28553,0.23788,0.22173,0.23  
219,0.15221,0.19138,0.1829,0.13618,0.14995,0.17774,0.16372,0.12898,0.0  
67299,0.061406,0.063718,0.069299,0.061018,0.072157,0.073683,0.061828,0  
.076957,0.059391,0.07822,0.071941,0.053416,0.072399,0.062077,0.061473,  
0.059279,0.057557,0.060864,0.17126,0.17732,0.18445,0.21842,0.25819,0.2  
4286,0.14051,0.14832,0.17797,0.17323,0.18157,0.14041,0.15331,0.14769,0  
.14166,0.18952,0.15096,0.12612,0.062258,0.062659,0.061975,0.068354,0.0  
72782,0.06722,0.067718,0.069563,0.074114,0.069729,0.068505,0.059199,0.  
076725,0.062493,0.068762,0.059624,0.060482,0.045585,0.047318,0.042131,  
0.18004,0.23655,0.2201,0.19538,0.19576,0.17905,0.20725,0.1775,0.24278,  
0.13602,0.16084,0.1637,0.14163,0.15966,0.16328,0.071026,0.068455,0.059  
816,0.063776,0.066871,0.067811,0.069362,0.057141,0.059968,0.074632,0.0  
58777,0.065668,0.059581,0.066409,0.067502,0.066626,0.071879,0.069048,0  
.05448,0.053365,0.054946,0.060439,0.19766,0.25087,0.18894,0.17488,0.21  
649,0.27404,0.21616,0.24011,0.23756,0.19417,0.17554,0.16307,0.067274,0  
.062809,0.072451,0.056912,0.063448,0.066732,0.070676,0.05306,0.061793,  
0.06418,0.065279,0.060106,0.06101,0.073387,0.067192,0.070608,0.058056,  
0.061248,0.066797,0.07753,0.047567,0.055872,0.050231,0.058434,0.052588  
,0.057544,0.19005,0.24502,0.20729,0.21502,0.12787,0.2146,0.26326,0.245  
63,0.071197,0.061119,0.063315,0.068449,0.066324,0.056955,0.056553,0.06  
2132,0.060999,0.064251,0.064562,0.06045,0.068044,0.064755,0.069919,0.0  
66161,0.061129,0.06455,0.05825,0.059698,0.068738,0.063779,0.068165,0.0  
58911,0.061997,0.052973,0.058073,0.056077,0.05309,0.17971,0.21785,0.21  
858,0.18163,0.20328,0.047789,0.048286,0.07001,0.074085,0.056496,0.0562  
12,0.07069,0.069532,0.064292,0.067234,0.056868,0.05839,0.077521,0.0625  
18,0.059584,0.057958,0.063502,0.069366,0.067547,0.061003,0.062389,0.06  
467,0.065931,0.046688,0.047284,0.060679,0.058609,0.062381,0.046902,0.0  
50822,0.053284,0.058107,0.051229,0.22331,0.22797,0.055466,0.067913,0.0  
51403,0.062761,0.065973,0.072919,0.057626,0.06725,0.064823,0.068563,0.

060302,0.068582,0.05752,0.054029,0.070419,0.063413,0.068209,0.07012,0.  
063516,0.068386,0.070663,0.069097,0.06433,0.051415,0.048028,0.043111,0.  
.04988,0.05014,0.057482,0.04878,0.047857,0.062449,0.057597,0.057075,0.  
06273,0.050371,0.047442,0.054359,0.05072,0.057259,0.056397,0.054553,0.  
072323,0.066,0.069161,0.067424,0.066082,0.057492,0.066601,0.074176,0.0.  
697,0.068271,0.063688,0.065734,0.06623,0.064356,0.060406,0.05476,0.051  
134,0.057309,0.050153,0.059954,0.053785,0.055161,0.060874,0.062405,0.0.  
53686,0.057533,0.043451,0.055179,0.056023,0.057299,0.04937,0.055665,0.  
046596,0.060065,0.06561,0.06239,0.055098,0.059979,0.057743,0.068168,0.  
061949,0.072259,0.057608,0.05985,0.061494,0.062484,0.048977,0.058988,0.  
.049639,0.053763,0.045977,0.060281,0.061337,0.058858,0.050259,0.051523  
,0.053808,0.059834,0.05772,0.055473,0.053014,0.054868,0.061733,0.05021  
6,0.051542,0.056024,0.052173,0.063579,0.064958,0.073689,0.062633,0.056  
441,0.063585,0.066907,0.05762,0.06324,0.055759,0.047408,0.056173,0.052  
752,0.059024,0.055676,0.061376,0.049816,0.052241,0.061279,0.050721,0.0.  
55234,0.049581,0.047733,0.049966,0.060228,0.047661,0.062565,0.056248,0.  
.060871,0.050844,0.063755,0.06856,0.045429,0.054651,0.074612,0.069951,  
0.059989,0.070138,0.050266,0.044723,0.060395,0.042525,0.060532,0.05843  
2,0.04753,0.054406,0.051946,0.064562,0.050601,0.057055,0.04865,0.05367  
4,0.053464,0.056529,0.058388,0.050396,0.055843,0.056311,0.048703,0.055  
242,0.044514,0.046751,0.052573,0.054725,0.06572,0.05584,0.057403,0.061  
158,0.053514,0.054126,0.055645,0.046888,0.052468,0.047269,0.059996,0.0.  
54287,0.042619,0.052318,0.056861,0.067927,0.060795,0.055611,0.065315,0.  
.046153,0.054922,0.047548,0.051713,0.043835,0.053282,0.05937,0.07052,0.  
.052652,0.058157,0.057158,0.057365,0.062377,0.058433,0.057582,0.049586  
,0.060479,0.052781,0.059573,0.043808,0.047048,0.056625,0.049754,0.0518  
95,0.05469,0.061837,0.048166,0.04278,0.050841,0.048045,0.045167,0.0615  
03,0.051198,0.061689,0.065788,0.05433,0.048953,0.044382,0.057213,0.051  
819,0.046619,0.053398,0.054032,0.05125,0.058023,0.056327,0.048521,0.06  
8489,0.062458,0.048909,0.04854,0.048233,0.055312,0.053818,0.052919,0.0.  
53702,0.054414,0.058244,0.040184,0.057737,0.052364,0.052701,0.049271,0.  
.054525,0.058372,0.053233,0.056066,0.063074,0.060707,0.050979,0.063915  
,0.053563,0.053007,0.056002,0.061504,0.057161,0.059672,0.064446,0.0480  
52,0.060326,0.052842,0.052137,0.062028,0.048285,0.061482,0.063277,0.05  
1559,0.048542,0.064925,0.052184,0.048882,0.052041,0.04659,0.048074,0.0.  
6431,0.049233,0.062146,0.064744,0.060869,0.058003,0.059513,0.054356,0.  
051539,0.058351,0.04469,0.052384,0.056281,0.062818,0.053938,0.052141,0.  
.054315,0.05433,0.051103,0.063857,0.052782,0.056883,0.053876,0.057207,  
0.056874,0.048838,0.062898,0.054129,0.053106,0.064396,0.05657,0.062302  
,0.05173,0.051968,0.060705,0.061274,0.060514,0.052796,0.056396,0.04589  
8,0.054298,0.056486,0.052146,0.07256,0.047581,0.050725,0.052029,0.0558  
7,0.051505,0.047465,0.04884,0.059228,0.060382,0.053405,0.060848,0.0477  
73  
0.07693,0.079925,0.071414,0.077589,0.066194,0.07172,0.071446,0.071731,  
0.084208,0.072806,0.077292,0.073367,0.065751,0.073281,0.080973,0.07574  
5,0.068997,0.073284,0.072626,0.073858,0.17875,0.19701,0.31914,0.26031,  
0.07693,0.078175,0.072587,0.072058,0.078005,0.071225,0.075127,0.079883  
,0.071398,0.072784,0.072655,0.071004,0.07452,0.07595,0.060651,0.37043,  
0.23765,0.2532,0.15482,0.24121,0.22255,0.19946,0.071857,0.07307,0.0712  
24,0.078753,0.077193,0.072412,0.078173,0.071625,0.081175,0.079003,0.08  
0881,0.064695,0.07936,0.070311,0.074746,0.32591,0.29364,0.20907,0.2246  
,0.18399,0.24409,0.19453,0.21451,0.18985,0.24622,0.077275,0.078492,0.0

76096,0.076372,0.066497,0.082172,0.068001,0.0723,0.07477,0.07927,0.069  
488,0.075842,0.081633,0.070806,0.06656,0.32018,0.42563,0.39801,0.19924  
,0.22005,0.20875,0.18704,0.23979,0.2367,0.22692,0.20718,0.22444,0.0669  
27,0.073793,0.078065,0.073935,0.072451,0.07584,0.074498,0.066332,0.068  
848,0.075199,0.065149,0.073897,0.080775,0.079005,0.072755,0.076166,0.3  
3654,0.36713,0.48978,0.39663,0.23748,0.21667,0.2644,0.19806,0.17457,0.  
18049,0.21766,0.19723,0.19764,0.21578,0.073788,0.070336,0.070022,0.087  
863,0.079573,0.085192,0.070547,0.067832,0.075944,0.071213,0.068423,0.0  
70881,0.077945,0.068421,0.080314,0.077578,0.32624,0.40227,0.35163,0.33  
553,0.34297,0.16888,0.17971,0.22795,0.23409,0.27904,0.18018,0.20044,0.  
17068,0.17818,0.22543,0.1717,0.076098,0.072776,0.078977,0.064952,0.073  
319,0.072718,0.080223,0.071948,0.082813,0.077597,0.072141,0.075856,0.0  
81495,0.072054,0.080251,0.068879,0.070133,0.34892,0.27689,0.45056,0.50  
801,0.41999,0.2615,0.19777,0.22894,0.18989,0.19952,0.24456,0.19412,0.2  
5059,0.22861,0.21397,0.26649,0.22258,0.070449,0.076434,0.077008,0.0754  
2,0.079867,0.075936,0.065019,0.071628,0.075798,0.0772,0.07396,0.080059  
,0.07091,0.064545,0.065339,0.06014,0.068611,0.27081,0.32663,0.41402,0.  
45641,0.323,0.34546,0.36,0.20514,0.23171,0.23917,0.2136,0.2853,0.23896  
,0.19928,0.21059,0.23676,0.20017,0.15692,0.077164,0.059653,0.078954,0.  
082019,0.076247,0.073802,0.073048,0.067892,0.073989,0.076201,0.073546,  
0.070945,0.072738,0.056266,0.06566,0.064068,0.068687,0.073879,0.33186,  
0.45759,0.46336,0.29516,0.43475,0.47977,0.31335,0.20615,0.23963,0.2258  
6,0.27088,0.1799,0.23961,0.18336,0.14511,0.20148,0.1978,0.22517,0.0750  
52,0.078532,0.074013,0.072975,0.075932,0.076558,0.071621,0.068657,0.06  
8206,0.065883,0.057848,0.069936,0.062198,0.059082,0.075687,0.059718,0.  
064153,0.066404,0.076698,0.38399,0.33564,0.30132,0.37125,0.29934,0.325  
31,0.42262,0.23197,0.21309,0.20511,0.16799,0.22381,0.22532,0.19163,0.1  
724,0.24095,0.1443,0.24382,0.24012,0.070542,0.071012,0.083145,0.070817  
,0.082535,0.070498,0.05296,0.060754,0.05625,0.060395,0.065738,0.062968  
,0.062053,0.06994,0.062995,0.066871,0.056437,0.060274,0.36991,0.35888,  
0.49319,0.36119,0.49832,0.45393,0.48499,0.20889,0.20226,0.2188,0.2282,  
0.22745,0.22954,0.23657,0.19603,0.26261,0.20076,0.15723,0.21538,0.0815  
49,0.071229,0.079002,0.067552,0.059514,0.059884,0.063023,0.065907,0.07  
1829,0.055331,0.071012,0.069074,0.061772,0.068524,0.071489,0.059339,0.  
062622,0.068513,0.41911,0.38966,0.41938,0.41392,0.28512,0.40219,0.3836  
2,0.42065,0.33142,0.20475,0.22846,0.15796,0.22433,0.19233,0.23371,0.21  
491,0.27403,0.22944,0.22827,0.21757,0.066574,0.078429,0.067383,0.06077  
1,0.06429,0.062265,0.067388,0.068977,0.063964,0.058559,0.06609,0.07045  
4,0.05919,0.068224,0.060762,0.067536,0.072543,0.063276,0.3636,0.29201,  
0.43935,0.37406,0.26786,0.34741,0.41354,0.35744,0.37995,0.22939,0.2412  
9,0.16661,0.13915,0.19188,0.16791,0.15433,0.17008,0.14253,0.19333,0.18  
401,0.070289,0.064733,0.064334,0.063087,0.066146,0.058131,0.068484,0.0  
67086,0.066353,0.066404,0.060531,0.069754,0.061689,0.06506,0.066209,0.  
059655,0.066307,0.062034,0.25302,0.34268,0.42989,0.2975,0.33339,0.3436  
5,0.26941,0.33002,0.49789,0.17278,0.18756,0.11792,0.17218,0.11821,0.18  
842,0.16435,0.16639,0.1835,0.17149,0.13176,0.052577,0.068476,0.072082,  
0.06095,0.059053,0.063501,0.069735,0.05644,0.060912,0.06376,0.061287,0  
.064793,0.069656,0.069217,0.063705,0.057989,0.067523,0.06305,0.37102,0  
.43947,0.41025,0.39051,0.35531,0.41256,0.40964,0.21101,0.26559,0.1742,  
0.18754,0.15745,0.13264,0.1226,0.14054,0.15012,0.16436,0.18113,0.13906  
,0.14848,0.068455,0.067795,0.063663,0.0632,0.064651,0.05672,0.066476,0  
.060993,0.064319,0.062842,0.055524,0.066501,0.060437,0.068102,0.060729



,0.070014,0.072949,0.063083,0.38799,0.32504,0.29301,0.39209,0.40974,0.38502,0.19005,0.15703,0.12201,0.22956,0.22055,0.20873,0.14439,0.17001,0.14567,0.15683,0.16499,0.19649,0.13652,0.14229,0.059815,0.05984,0.060654,0.071037,0.064581,0.066661,0.065941,0.056251,0.066526,0.060724,0.061965,0.062536,0.063203,0.068249,0.071331,0.056922,0.069435,0.062462,0.4543,0.33472,0.38436,0.34712,0.36876,0.22595,0.18937,0.19526,0.18913,0.20663,0.24218,0.16429,0.17052,0.17523,0.16313,0.16047,0.2024,0.14476,0.16047,0.15945,0.066282,0.062009,0.059362,0.059044,0.054243,0.068685,0.065952,0.066433,0.061543,0.055214,0.061126,0.072223,0.056623,0.069863,0.054815,0.054721,0.052073,0.066502,0.33858,0.32713,0.39626,0.23563,0.23948,0.16413,0.21951,0.24077,0.26399,0.1773,0.22462,0.22021,0.19079,0.14685,0.15197,0.18756,0.17437,0.15699,0.17271,0.17512,0.062951,0.074483,0.061306,0.065177,0.067574,0.069168,0.06985,0.068535,0.060375,0.063574,0.059881,0.069332,0.071502,0.066248,0.057445,0.069524,0.067518,0.058302,0.38195,0.17497,0.27922,0.21683,0.23956,0.21089,0.19086,0.27361,0.22905,0.2154,0.21618,0.11525,0.14869,0.18812,0.14197,0.17549,0.11744,0.21253,0.15502,0.057802,0.073095,0.077253,0.067097,0.075288,0.064676,0.069836,0.05348,0.072429,0.063828,0.063834,0.059827,0.060556,0.068554,0.061879,0.068926,0.073777,0.051682,0.22907,0.17834,0.3008,0.1638,0.18963,0.21462,0.25616,0.24003,0.16757,0.26462,0.17529,0.19201,0.16314,0.17896,0.12032,0.15516,0.14261,0.11721,0.1374,0.068021,0.065307,0.071304,0.064801,0.063602,0.060111,0.055555,0.059583,0.071911,0.070234,0.059893,0.076481,0.066877,0.069272,0.074979,0.068201,0.065527,0.052506,0.1473,0.1696,0.15765,0.20449,0.19031,0.15798,0.24515,0.22422,0.20696,0.24249,0.15771,0.18899,0.1917,0.14179,0.14052,0.15561,0.1742,0.13173,0.0659,0.063801,0.060202,0.071356,0.061504,0.071725,0.073942,0.060903,0.076872,0.060508,0.078637,0.071809,0.054564,0.070824,0.060079,0.064231,0.054644,0.055312,0.055227,0.16061,0.16257,0.16927,0.20878,0.24953,0.23875,0.13038,0.15281,0.18548,0.17096,0.18409,0.14355,0.15198,0.16716,0.1526,0.17412,0.17466,0.11103,0.05911,0.060701,0.063316,0.067482,0.073428,0.06451,0.065,0.065295,0.073045,0.068872,0.068213,0.058202,0.073579,0.063736,0.065572,0.054648,0.060364,0.049564,0.048432,0.044885,0.19902,0.2495,0.22365,0.19261,0.18992,0.18509,0.20437,0.17003,0.22533,0.12283,0.16961,0.16787,0.15282,0.14502,0.17224,0.068239,0.064273,0.06176,0.06485,0.066419,0.06795,0.068475,0.055013,0.057499,0.070568,0.061989,0.066909,0.065675,0.062419,0.067658,0.065647,0.070962,0.067906,0.049817,0.050709,0.052567,0.058616,0.20598,0.26848,0.19573,0.16403,0.20042,0.2665,0.21618,0.24832,0.21407,0.20281,0.16073,0.16021,0.067556,0.062226,0.070941,0.060214,0.062609,0.067283,0.071656,0.055597,0.060651,0.066954,0.067443,0.059547,0.059616,0.069782,0.063758,0.0707,0.057306,0.062627,0.063556,0.074487,0.046668,0.051458,0.051814,0.054289,0.047312,0.058147,0.18638,0.23813,0.20897,0.20818,0.11071,0.23006,0.24617,0.25847,0.063537,0.06234,0.057205,0.068304,0.063248,0.057659,0.057245,0.06256,0.060215,0.061825,0.062186,0.057924,0.064083,0.065357,0.071559,0.064891,0.058404,0.062331,0.054218,0.059959,0.067072,0.063372,0.07048,0.056667,0.058856,0.053051,0.061506,0.053189,0.053375,0.16221,0.21939,0.22212,0.16204,0.21447,0.047622,0.044622,0.066936,0.073632,0.055326,0.055355,0.067023,0.070255,0.063675,0.066456,0.055661,0.059821,0.072922,0.061496,0.059614,0.058388,0.063576,0.072311,0.065123,0.062213,0.065321,0.061834,0.067073,0.04402,0.039654,0.060193,0.054452,0.058076,0.04583,0.055693,0.052251,0.057816,0.052874,0.21878,0.23112,0.058454,0.06561,0.052358,0.06111,0.067242,0.070984,0.057537,0.063075,0.061048,0.06595,

0.058092,0.066086,0.057911,0.052811,0.072423,0.061934,0.069921,0.06684  
1,0.061356,0.067466,0.071337,0.06786,0.06316,0.054521,0.047711,0.04125  
8,0.047602,0.051665,0.051972,0.047126,0.046401,0.06285,0.057997,0.0572  
39,0.058726,0.048722,0.052903,0.054111,0.051582,0.055876,0.058352,0.05  
1413,0.070161,0.065299,0.065798,0.06377,0.066668,0.057074,0.063487,0.0  
73211,0.067961,0.066808,0.062785,0.064273,0.065372,0.065526,0.055344,0  
.054181,0.052192,0.055405,0.047572,0.056456,0.052298,0.053672,0.059533  
,0.06759,0.056717,0.056815,0.040908,0.05553,0.05658,0.054981,0.051238,  
0.05708,0.045706,0.062526,0.065369,0.061529,0.053275,0.059581,0.055899  
,0.068342,0.057479,0.069119,0.056161,0.059933,0.061307,0.06346,0.05148  
1,0.058008,0.047571,0.056036,0.047791,0.057899,0.057848,0.054362,0.049  
921,0.051907,0.053198,0.057656,0.055839,0.053518,0.052102,0.051289,0.0  
58065,0.04996,0.052803,0.057527,0.054173,0.059607,0.061838,0.071615,0.  
063504,0.056288,0.06073,0.065709,0.056974,0.060664,0.05962,0.049191,0.  
054602,0.052102,0.058102,0.056919,0.060562,0.049307,0.047776,0.057335,  
0.048844,0.052213,0.048505,0.052985,0.051738,0.060795,0.042495,0.05800  
3,0.059509,0.060913,0.046103,0.06678,0.066599,0.045438,0.058285,0.0703  
51,0.069853,0.062994,0.06882,0.050952,0.041901,0.061977,0.040208,0.056  
458,0.06038,0.052293,0.056956,0.056134,0.061456,0.054787,0.056611,0.04  
9644,0.058015,0.052342,0.056205,0.05858,0.052883,0.054482,0.054541,0.0  
50988,0.056287,0.044983,0.04794,0.055835,0.054567,0.064854,0.053158,0.  
059291,0.05577,0.05091,0.050585,0.050012,0.045866,0.055185,0.042444,0.  
060872,0.056038,0.04068,0.054709,0.053008,0.065353,0.060227,0.054535,0  
.062946,0.044382,0.052838,0.049453,0.049966,0.048524,0.056436,0.062091  
,0.06589,0.054416,0.05621,0.056155,0.057091,0.062613,0.05493,0.06119,0  
.048778,0.057819,0.053499,0.061836,0.042317,0.046936,0.058901,0.048474  
,0.052288,0.056085,0.057831,0.046336,0.047407,0.04909,0.052369,0.04489  
5,0.062238,0.048377,0.059555,0.062952,0.053579,0.048119,0.046163,0.049  
485,0.049382,0.046332,0.055416,0.053313,0.047941,0.060962,0.055488,0.0  
52183,0.063499,0.065523,0.050382,0.047439,0.052365,0.057003,0.052568,0  
.054677,0.053108,0.053248,0.061348,0.045193,0.058892,0.055392,0.05406,  
0.052611,0.05393,0.059009,0.049623,0.05547,0.061817,0.060917,0.053766,  
0.063638,0.053854,0.05457,0.056544,0.057069,0.055709,0.058691,0.061607  
,0.04448,0.057161,0.053104,0.053822,0.063627,0.049252,0.05773,0.060789  
,0.054592,0.047516,0.065854,0.055388,0.051811,0.049157,0.04586,0.04758  
2,0.061872,0.049556,0.059666,0.067472,0.058357,0.055491,0.061648,0.052  
946,0.056651,0.058291,0.045127,0.056292,0.052106,0.058442,0.047966,0.0  
4973,0.057523,0.05014,0.047875,0.064718,0.053352,0.053232,0.052926,0.0  
58214,0.054539,0.045311,0.060571,0.052288,0.052958,0.065462,0.054605,0  
.059318,0.052086,0.051273,0.061877,0.061515,0.055837,0.053367,0.057172  
,0.048547,0.056018,0.050479,0.052743,0.074689,0.047855,0.054094,0.0516  
23,0.054082,0.051138,0.049364,0.047261,0.056803,0.059075,0.053618,0.06  
0766,0.051057

#simdataS4SNR15:

Kep\_f=1.5  
Kep\_f=1.5  
Kep\_s=0.6  
Ktrans\_f=0.08  
Ktrans\_s=0.05

del\_t=0.5

|         |         |         |         |         |         |
|---------|---------|---------|---------|---------|---------|
| gtSf=0  | 0       | 0       | 0       | 0       | 0       |
| 0       | 0       | 0       | 0       | 0       | 0       |
| 0       | 0       | 0       | 0       | 0       | 0       |
| 0       | 0       | 0       | 0       | 0       | 0       |
| 0       | 0       | 0       | 0       | 0       | 0       |
| 0       | 0       | 0       | 0       | 0       | 0       |
| 0       | 0       | 0       | 0       | 0       | 0       |
| 0       | 0       | 0       | 0       | 0       | 0       |
| 0       | 0       | 0       | 0       | 0       | 0       |
| 0       | 0       | 0       | 0       | 0       | 0       |
| 0       | 0       | 0       | 0       | 0       | 0       |
| 0       | 0       | 0       | 0       | 0       | 0       |
| 0       | 0       | 0       | 0       | 0       | 0       |
| 0       | 0       | 0       | 0       | 0       | 0       |
| 0       | 0       | 0       | 0       | 0       | 0       |
| 0       | 0       | 0       | 0       | 0       | 0       |
| 0       | 0       | 0       | 0       | 0       | 0       |
| 0       | 0       | 0       | 0       | 0       | 0       |
| 0       | 0       | 0       | 0       | 0       | 0       |
| 0       | 0       | 0       | 0       | 0       | 0       |
| 0       | 0       | 0       | 0       | 0       | 0       |
| 0       | 0       | 0       | 0       | 0       | 0       |
| 0       | 0       | 0       | 0       | 0       | 0       |
| 0       | 0       | 0       | 0       | 0       | 0       |
| 0       | 0       | 0       | 0       | 0       | 0       |
| 0       | 0       | 0       | 0       | 0       | 0       |
| 0       | 0       | 0       | 0       | 0       | 0       |
| 0       | 0       | 0       | 0       | 0       | 0       |
| 0       | 0       | 0       | 0       | 0       | 0       |
| 0       | 0       | 0       | 0       | 0       | 0       |
| 0       | 0       | 0       | 0       | 0       | 0       |
| 0       | 0       | 0       | 0       | 0       | 0       |
| 0       | 0       | 0       | 0       | 0       | 0       |
| 0       | 0       | 0       | 0.5     | 0.5     | 0.47674 |
| 0       | 0       | 0       | 0       | 0       | 0       |
| 0       | 0       | 0       | 0       | 0       | 0       |
| 0       | 0       | 0       | 0       | 0       | 0       |
| 0       | 0       | 0       | 0       | 0       | 0       |
| 0       | 0       | 0       | 0       | 0       | 0       |
| 0       | 0       | 0       | 0       | 0       | 0       |
| 0       | 0       | 0       | 0       | 0       | 0       |
| 0.48856 | 0.51552 | 0.49426 | 0.39893 | 0.5     | 0.5184  |
| 0       | 0       | 0       | 0       | 0       | 0       |
| 0       | 0       | 0       | 0       | 0       | 0       |
| 0       | 0       | 0       | 0       | 0       | 0       |
| 0       | 0       | 0       | 0       | 0       | 0       |
| 0       | 0       | 0       | 0       | 0       | 0       |
| 0       | 0       | 0       | 0       | 0.55138 | 0.40926 |
| 0.53459 | 0.5     | 0.56266 | 0.5     | 0.49648 | 0.51852 |
| 0.5702  | 0       | 0       | 0       | 0       | 0       |
| 0       | 0       | 0       | 0       | 0       | 0       |
| 0       | 0       | 0       | 0       | 0       | 0       |
| 0       | 0       | 0       | 0       | 0       | 0       |

|         |         |         |         |         |         |     |
|---------|---------|---------|---------|---------|---------|-----|
| 0       | 0       | 0       | 0.62502 | 0.5     | 0.5     | 0.5 |
| 0.52892 | 0.5     | 0.57297 | 0.5     | 0.5     | 0.5     | 0.5 |
| 0.41802 | 0.48027 | 0.50174 | 0       | 0       | 0       | 0   |
| 0       | 0       | 0       | 0       | 0       | 0       | 0   |
| 0       | 0       | 0       | 0       | 0       | 0       | 0   |
| 0       | 0       | 0       | 0       | 0       | 0       | 0   |
| 0       | 0.5     | 0.5     | 0.55098 | 0.43248 | 0.39382 |     |
| 0.51221 | 0.46406 | 0.5     | 0.52611 | 0.39504 | 0.5     |     |
| 0.5     | 0.5     | 0.5     | 0.5     | 0       | 0       |     |
| 0       | 0       | 0       | 0       | 0       | 0       |     |
| 0       | 0       | 0       | 0       | 0       | 0       |     |
| 0       | 0       | 0       | 0       | 0       | 0       |     |
| 0.44895 | 0.53074 | 0.53817 | 0.5     | 0.5     | 0.5     |     |
| 0.50569 | 0.54374 | 0.56245 | 0.38743 | 0.3908  | 0.51584 |     |
| 0.5     | 0.4871  | 0.50029 | 0.49072 | 0.53615 | 0.5326  |     |
| 0       | 0       | 0       | 0       | 0       | 0       |     |
| 0       | 0       | 0       | 0       | 0       | 0.35252 |     |
| 0.29854 | 0.27512 | 0.3521  | 0.28017 | 0.3573  | 0.27525 |     |
| 0.33333 | 0.33333 | 0.5     | 0.61744 | 0.42941 | 0.5     |     |
| 0.52769 | 0.58075 | 0.52659 | 0.68847 | 0.4653  | 0.5     |     |
| 0.40165 | 0.5     | 0.50882 | 0.40482 | 0.52532 | 0.47202 |     |
| 0.6903  | 0.45156 | 0       | 0       | 0       | 0       |     |
| 0       | 0       | 0       | 0       | 0       | 0.51944 |     |
| 0.30433 | 0.32854 | 0.20833 | 0.24075 | 0.27267 | 0.36221 |     |
| 0.37778 | 0.45817 | 0.31856 | 0.2381  | 0.56161 | 0.5     |     |
| 0.5     | 0.5     | 0.49447 | 0.5     | 0.52964 | 0.38274 |     |
| 0.49119 | 0.42443 | 0.57812 | 0.51826 | 0.44593 | 0.55196 |     |
| 0.4131  | 0.56053 | 0.43445 | 0.60111 | 0       | 0       |     |
| 0       | 0       | 0       | 0       | 0       | 0.65588 |     |
| 0.40227 | 0.44886 | 0.32223 | 0.2831  | 0.3373  | 0.34419 |     |
| 0.39486 | 0.33264 | 0.34658 | 0.40163 | 0.43254 | 0.37701 |     |
| 0.44873 | 0.5     | 0.45647 | 0.51769 | 0.5     | 0.48007 |     |
| 0.54894 | 0.5     | 0.49328 | 0.52311 | 0.5     | 0.5     |     |
| 0.5     | 0.50262 | 0.54524 | 0.44054 | 0.5     | 0.5     |     |
| 0       | 0       | 0       | 0       | 0       | 0       |     |
| 0.57516 | 0.5     | 0.44642 | 0.5     | 0.37579 | 0.402   |     |
| 0.33333 | 0.3728  | 0.44433 | 0.35932 | 0.3636  | 0.31462 |     |
| 0.34417 | 0.34195 | 0.5     | 0.5     | 0.5     | 0.49505 |     |
| 0.4678  | 0.47613 | 0.50011 | 0.51507 | 0.46905 | 0.5     |     |
| 0.52722 | 0.43625 | 0.47377 | 0.5     | 0.5     | 0.43901 |     |
| 0.48506 | 0.62908 | 0       | 0       | 0       | 0       |     |
| 0       | 0.47956 | 0.5     | 0.44515 | 0.5     | 0.44635 |     |
| 0.41745 | 0.39977 | 0.26431 | 0.33708 | 0.36251 | 0.28514 |     |
| 0.33333 | 0.22917 | 0.3461  | 0.30851 | 0.5     | 0.53841 |     |
| 0.57845 | 0.5     | 0.5365  | 0.5     | 0.5     | 0.5     |     |
| 0.47225 | 0.5     | 0.5     | 0.5     | 0.5     | 0.61572 |     |
| 0.55769 | 0.67712 | 0.56563 | 0.5     | 0       | 0       |     |
| 0       | 0.5     | 0.51556 | 0.54495 | 0.5     | 0.47263 |     |
| 0.5     | 0.47452 | 0.5     | 0.41926 | 0.39885 | 0.33333 |     |
| 0.35132 | 0.26207 | 0.33333 | 0.32259 | 0.3354  | 0.34319 |     |
| 0.47484 | 0.46894 | 0.50607 | 0.42999 | 0.57022 | 0.45366 |     |
| 0.43246 | 0.46015 | 0.50721 | 0.45774 | 0.48464 | 0.56637 |     |

|         |         |         |         |         |         |
|---------|---------|---------|---------|---------|---------|
| 0.45892 | 0.46952 | 0.61508 | 0.5     | 0.45278 | 0.41483 |
| 0       | 0.55074 | 0.49193 | 0.52212 | 0.44015 | 0.54196 |
| 0.50084 | 0.5     | 0.55671 | 0.48797 | 0.35072 | 0.37299 |
| 0.3709  | 0.28055 | 0.39629 | 0.32889 | 0.35687 | 0.32173 |
| 0.32492 | 0.45386 | 0.56591 | 0.5     | 0.5     | 0.40351 |
| 0.59596 | 0.5     | 0.48018 | 0.5229  | 0.54747 | 0.5306  |
| 0.5     | 0.34905 | 0.53928 | 0.52684 | 0.4867  | 0.54282 |
| 1       | 0.59278 | 0.47065 | 0.37917 | 0.5     | 0.59238 |
| 0.50335 | 0.5     | 0.50759 | 0.40079 | 0.4753  | 0.34591 |
| 0.36449 | 0.3321  | 0.35316 | 0.35715 | 0.37676 | 0.35465 |
| 0.30657 | 0.33333 | 0.5     | 0.52138 | 0.5     | 0.5     |
| 0.50814 | 0.513   | 0.44029 | 0.51548 | 0.47655 | 0.61333 |
| 0.5997  | 0.52505 | 0.46621 | 0.49104 | 0.52681 | 0.43187 |
| 0.5     | 1       | 0.3993  | 0.58385 | 0.5     | 0.5     |
| 0.51231 | 0.49473 | 0.49559 | 0.5005  | 0.48266 | 0.45163 |
| 0.32744 | 0.30858 | 0.33333 | 0.33333 | 0.25502 | 0.34694 |
| 0.3601  | 0.34024 | 0.5     | 0.3672  | 0.42536 | 0.50864 |
| 0.54285 | 0.5     | 0.48739 | 0.494   | 0.39905 | 0.5     |
| 0.5     | 0.55941 | 0.51321 | 0.51034 | 0.5     | 0.45839 |
| 0.4053  | 0.30764 | 1       | 0.51046 | 0.4942  | 0.54528 |
| 0.60941 | 0.46592 | 0.5     | 0.46531 | 0.39758 | 0.5     |
| 0.50938 | 0.34996 | 0.35417 | 0.30481 | 0.34405 | 0.38795 |
| 0.34119 | 0.25646 | 0.31616 | 0.51123 | 0.5     | 0.64401 |
| 0.5     | 0.51028 | 0.58241 | 0.49963 | 0.5     | 0.5     |
| 0.43992 | 0.46382 | 0.57076 | 0.55419 | 0.5     | 0.5885  |
| 0.49178 | 0.50293 | 1       | 1       | 1       | 0.55408 |
| 0.5     | 0.5     | 0.54433 | 0.5     | 0.235   | 0.42779 |
| 0.41629 | 0.47565 | 0.28447 | 0.3206  | 0.2971  | 0.41512 |
| 0.2891  | 0.35868 | 0.5     | 0.54837 | 0.55656 | 0.5     |
| 0.56442 | 0.5006  | 0.59129 | 0.5     | 0.57247 | 0.5     |
| 0.52299 | 0.5     | 0.48784 | 0.49877 | 0.5     | 0.5     |
| 0.43786 | 0.3542  | 1       | 1       | 1       | 1       |
| 0.53272 | 0.42383 | 0.52629 | 0.52857 | 0.5     | 0.50433 |
| 0.58275 | 0.34952 | 0.51688 | 0.31595 | 0.37753 | 0.33333 |
| 0.43469 | 0.43271 | 0.55883 | 0.5     | 0.5107  | 0.5     |
| 0.46456 | 0.50014 | 0.48977 | 0.55374 | 0.48111 | 0.47337 |
| 0.60512 | 0.5     | 0.58313 | 0.61041 | 0.5     | 0.57112 |
| 0.5     | 0.49198 | 1       | 1       | 1       | 1       |
| 1       | 1       | 0.46485 | 0.54541 | 0.5     | 0.45087 |
| 0.5     | 0.5     | 0.44692 | 0.5     | 0.47012 | 0.5     |
| 0.46007 | 0.47739 | 0.52654 | 0.5     | 0.55348 | 0.5     |
| 0.5     | 0.62869 | 0.5     | 0.41924 | 0.5     | 0.49283 |
| 0.5     | 0.49512 | 0.53954 | 0.4585  | 0.49646 | 0.51504 |
| 0.5     | 0.5     | 0.5     | 1       | 1       | 1       |
| 1       | 1       | 1       | 0.48411 | 0.63255 | 0.48729 |
| 0.52795 | 0.49201 | 1       | 1       | 0.41219 | 0.44538 |
| 0.51809 | 0.42539 | 0.53928 | 0.53706 | 0.43083 | 0.58741 |
| 0.51546 | 0.56815 | 0.5     | 0.51972 | 0.51836 | 0.5     |
| 0.48545 | 0.47421 | 0.54391 | 0.50327 | 0.45203 | 0.5     |
| 0.50368 | 1       | 1       | 1       | 1       | 1       |
| 1       | 1       | 1       | 1       | 1       | 0.32417 |
| 0.43281 | 1       | 1       | 1       | 1       | 0.60525 |



|         |         |         |         |         |         |         |
|---------|---------|---------|---------|---------|---------|---------|
| 1       | 1       | 1       | 1       | 1       | 1       | 1       |
| 1       | 1       | 1       | 1       | 1       | 1       | 1       |
| 1       | 1       | 1       | 1       | 1       | 1       | 1       |
| 1       | 1       | 1       | 1       | 1       | 1       | 1       |
| 1       |         |         |         |         |         |         |
| gtSs=1  | 1       | 1       | 1       | 1       | 1       | 1       |
| 1       | 1       | 1       | 1       | 1       | 1       | 1       |
| 1       | 1       | 1       | 1       | 1       | 1       | 1       |
| 1       | 1       | 0.57179 | 0.44766 | 0.57557 | 0.50669 |         |
| 1       | 1       | 1       | 1       | 1       | 1       | 1       |
| 1       | 1       | 1       | 1       | 1       | 1       | 1       |
| 1       | 1       | 1       | 0       | 0.5     | 0.48103 |         |
| 0.5     | 0.39933 | 0.50969 | 0.42464 | 1       |         | 1       |
| 1       | 1       | 1       | 1       | 1       | 1       | 1       |
| 1       | 1       | 1       | 1       | 1       | 1       | 1       |
| 1       | 0       | 0       | 0.50798 | 0.5     | 0.5     |         |
| 0.45661 | 0.42463 | 0.59304 | 0.56978 | 0.5     |         | 1       |
| 1       | 1       | 1       | 1       | 1       | 1       | 1       |
| 1       | 1       | 1       | 1       | 1       | 1       | 1       |
| 1       | 1       | 0       | 0       | 0       | 0.50189 |         |
| 0.43858 | 0.55686 | 0.58082 |         | 0.5     | 0.44961 | 0.5     |
| 0.66753 | 0.34599 | 1       |         | 1       | 1       | 1       |
| 1       | 1       | 1       | 1       | 1       | 1       | 1       |
| 1       | 1       | 1       | 1       | 1       | 1       | 1       |
| 0       | 0       | 0       | 0       | 0.57639 | 0.51809 |         |
| 0.5     | 0.45066 | 0.45921 | 0.4581  | 0.5     | 0.53426 |         |
| 0.5     | 0.5     | 1       | 1       | 1       | 1       | 1       |
| 1       | 1       | 1       | 1       | 1       | 1       | 1       |
| 1       | 1       | 1       | 1       | 1       | 1       | 1       |
| 0       | 0       | 0       | 0       | 0       | 0       | 0       |
| 0.46425 | 0.70018 | 0.62809 | 0.54496 |         | 0.5     | 0.45482 |
| 0.5     | 0.57384 | 0.59503 | 0.43233 | 1       |         | 1       |
| 1       | 1       | 1       | 1       | 1       | 1       | 1       |
| 1       | 1       | 1       | 1       | 1       | 1       | 1       |
| 1       | 1       | 1       | 0       | 0       | 0       | 0       |
| 0       | 0       | 0       | 0.48318 | 0.46694 | 0.5     |         |
| 0.5     | 0.52561 | 0.39751 | 0.4992  | 0.51748 | 0.32872 |         |
| 0.53023 | 0.50952 | 1       | 1       | 1       | 1       | 1       |
| 1       | 1       | 1       | 1       | 1       | 1       | 1       |
| 1       | 1       | 1       | 0.5     | 0.5     | 0.52326 |         |
| 1       | 0       | 0       | 0       | 0       | 0       | 0       |
| 0       | 0       | 0.5     | 0.5     | 0.43352 | 0.56423 |         |
| 0.5115  | 0.49197 | 0.46769 | 0.42148 | 0.37958 |         | 0.5     |
| 0.52738 | 1       | 1       | 1       | 1       | 1       | 1       |
| 1       | 1       | 1       | 1       | 1       | 1       | 1       |
| 0.51144 | 0.48448 | 0.50574 | 0.60107 | 0.5     | 0.4816  |         |
| 1       | 0       | 0       | 0       | 0       | 0       | 0       |
| 0       | 0       | 0.56521 | 0.65015 | 0.46595 | 0.50583 |         |
| 0.47803 | 0.37537 | 0.63423 | 0.55169 | 0.47406 |         | 0.5     |
| 0.51319 | 1       | 1       | 1       | 1       | 1       | 1       |
| 1       | 1       | 1       | 1       | 0.44862 | 0.59074 |         |
| 0.46541 | 0.5     | 0.43734 | 0.5     | 0.50352 | 0.48148 |         |

|         |         |         |         |         |         |   |
|---------|---------|---------|---------|---------|---------|---|
| 0.4298  | 1       | 0       | 0       | 0       | 0       | 0 |
| 0       | 0       | 0       | 0.509   | 0.5     | 0.47893 |   |
| 0.46145 | 0.5     | 0.5     | 0.46326 | 0.49664 | 0.43174 |   |
| 0.49153 | 0.43516 | 0.5     | 1       | 1       | 1       |   |
| 1       | 1       | 1       | 0.37498 | 0.5     | 0.5     |   |
| 0.47108 | 0.5     | 0.42703 | 0.5     | 0.5     | 0.5     |   |
| 0.58198 | 0.51973 | 0.49826 | 0       | 0       | 0       |   |
| 0       | 0       | 0       | 0       | 0.5     | 0.55985 |   |
| 0.50363 | 0.41301 | 0.40064 | 0.52475 | 0.51306 | 0.49246 |   |
| 0.46467 | 0.49077 | 0.68977 | 0.5484  | 1       | 1       |   |
| 1       | 0.5     | 0.5     | 0.44902 | 0.56752 | 0.60618 |   |
| 0.48779 | 0.53594 | 0.5     | 0.47389 | 0.60496 | 0.5     |   |
| 0.5     | 0.5     | 0.5     | 0.5     | 0       | 0       |   |
| 0       | 0       | 0       | 0       | 0       | 0       |   |
| 0       | 0.50717 | 0.46015 | 0.5     | 0.49971 | 0.5     |   |
| 0.61647 | 0.41448 | 0.47219 | 0.49796 | 0.55853 | 0.49081 |   |
| 0.55105 | 0.46926 | 0.46183 | 0.5     | 0.5     | 0.5     |   |
| 0.49431 | 0.45626 | 0.43755 | 0.61257 | 0.6092  | 0.48416 |   |
| 0.5     | 0.5129  | 0.49971 | 0.50928 | 0.46385 | 0.4674  |   |
| 0       | 0       | 0       | 0       | 0       | 0       |   |
| 0       | 0       | 0       | 0.5     | 0.5     | 0.32817 |   |
| 0.35073 | 0.37967 | 0.38181 | 0.33378 | 0.35466 | 0.3814  |   |
| 0.33333 | 0.33333 | 0.5     | 0.38256 | 0.57059 | 0.5     |   |
| 0.47231 | 0.41925 | 0.47341 | 0.31153 | 0.5347  | 0.5     |   |
| 0.59835 | 0.5     | 0.49118 | 0.59518 | 0.47468 | 0.52798 |   |
| 0.3097  | 0.54844 | 0       | 0       | 0       | 0       |   |
| 0       | 0       | 0       | 0       | 0       | 0       |   |
| 0.3574  | 0.27652 | 0.34281 | 0.34644 | 0.40103 | 0.27557 |   |
| 0.37778 | 0.25239 | 0.34072 | 0.35777 | 0.43839 | 0.5     |   |
| 0.5     | 0.5     | 0.50553 | 0.5     | 0.47036 | 0.61726 |   |
| 0.50881 | 0.57557 | 0.42188 | 0.48174 | 0.55407 | 0.44804 |   |
| 0.5869  | 0.43947 | 0.56555 | 0.39889 | 0       | 0       |   |
| 0       | 0       | 0       | 0       | 0       | 0       |   |
| 0       | 0       | 0.33889 | 0.47826 | 0.3254  | 0.31161 |   |
| 0.21029 | 0.33449 | 0.30683 | 0.40163 | 0.34303 | 0.30196 |   |
| 0.55127 | 0.5     | 0.54353 | 0.48231 | 0.5     | 0.51993 |   |
| 0.45106 | 0.5     | 0.50672 | 0.47689 | 0.5     | 0.5     |   |
| 0.5     | 0.49738 | 0.45476 | 0.55946 | 0.5     | 0.5     |   |
| 0       | 0       | 0       | 0       | 0       | 0       |   |
| 0       | 0       | 0       | 0       | 0       | 0.17972 |   |
| 0.33333 | 0.3728  | 0.22265 | 0.3474  | 0.3636  | 0.34135 |   |
| 0.34417 | 0.33504 | 0.5     | 0.5     | 0.5     | 0.50495 |   |
| 0.5322  | 0.52387 | 0.49989 | 0.48493 | 0.53095 | 0.5     |   |
| 0.47278 | 0.56375 | 0.52623 | 0.5     | 0.5     | 0.56099 |   |
| 0.51494 | 0.37092 | 0       | 0       | 0       | 0       |   |
| 0       | 0       | 0       | 0       | 0       | 0       |   |
| 0       | 0.39883 | 0.39092 | 0.32584 | 0.33788 | 0.35743 |   |
| 0.33333 | 0.34083 | 0.292   | 0.34574 | 0.5     | 0.46159 |   |
| 0.42155 | 0.5     | 0.4635  | 0.5     | 0.5     | 0.5     |   |
| 0.52775 | 0.5     | 0.5     | 0.5     | 0.5     | 0.38428 |   |
| 0.44231 | 0.32288 | 0.43437 | 0.5     | 0       | 0       |   |
| 0       | 0       | 0       | 0       | 0       | 0       |   |



|         |         |         |         |         |         |  |
|---------|---------|---------|---------|---------|---------|--|
| 0       | 0       | 0       | 0.2216  | 0.22627 | 0.33333 |  |
| 0.27127 | 0.40974 | 0.33333 | 0.33367 | 0.30046 | 0.31969 |  |
| 0.52516 | 0.53106 | 0.49393 | 0.57001 | 0.42978 | 0.54634 |  |
| 0.56754 | 0.53985 | 0.49279 | 0.54226 | 0.51536 | 0.43363 |  |
| 0.54108 | 0.53048 | 0.38492 | 0.5     | 0.54722 | 0.58517 |  |
| 0       | 0       | 0       | 0       | 0       | 0       |  |
| 0       | 0       | 0       | 0       | 0.27275 | 0.25402 |  |
| 0.35747 | 0.35972 | 0.318   | 0.36016 | 0.35687 | 0.37578 |  |
| 0.33754 | 0.54614 | 0.43409 | 0.5     | 0.5     | 0.59649 |  |
| 0.40404 | 0.5     | 0.51982 | 0.4771  | 0.45253 | 0.4694  |  |
| 0.5     | 0.65095 | 0.46072 | 0.47316 | 0.5133  | 0.45718 |  |
| 0       | 0       | 0       | 0       | 0       | 0       |  |
| 0       | 0       | 0       | 0       | 0       | 0.34591 |  |
| 0.27102 | 0.40117 | 0.29367 | 0.35958 | 0.28479 | 0.2907  |  |
| 0.32203 | 0.33333 | 0.5     | 0.47862 | 0.5     | 0.5     |  |
| 0.49186 | 0.487   | 0.55971 | 0.48452 | 0.52345 | 0.38667 |  |
| 0.4003  | 0.47495 | 0.53379 | 0.50896 | 0.47319 | 0.56813 |  |
| 0.5     | 0       | 0       | 0       | 0       | 0       |  |
| 0       | 0       | 0       | 0       | 0       | 0       |  |
| 0.3519  | 0.33492 | 0.33333 | 0.33333 | 0.38539 | 0.2797  |  |
| 0.33549 | 0.33974 | 0.5     | 0.6328  | 0.57464 | 0.49136 |  |
| 0.45715 | 0.5     | 0.51261 | 0.506   | 0.60095 | 0.5     |  |
| 0.5     | 0.44059 | 0.48679 | 0.48966 | 0.5     | 0.54161 |  |
| 0.5947  | 0.69236 | 0       | 0       | 0       | 0       |  |
| 0       | 0       | 0       | 0       | 0       | 0       |  |
| 0       | 0.36364 | 0.29166 | 0.39875 | 0.31191 | 0.26341 |  |
| 0.31763 | 0.36718 | 0.3494  | 0.48877 | 0.5     | 0.35599 |  |
| 0.5     | 0.48972 | 0.41759 | 0.50037 | 0.5     | 0.5     |  |
| 0.56008 | 0.53618 | 0.42924 | 0.44581 | 0.5     | 0.4115  |  |
| 0.50822 | 0.49707 | 0       | 0       | 0       | 0       |  |
| 0       | 0       | 0       | 0       | 0       | 0       |  |
| 0       | 0       | 0.38354 | 0.38831 | 0.35145 | 0.23017 |  |
| 0.33139 | 0.24864 | 0.5     | 0.45163 | 0.44344 | 0.5     |  |
| 0.43558 | 0.4994  | 0.40871 | 0.5     | 0.42753 | 0.5     |  |
| 0.47701 | 0.5     | 0.51216 | 0.50123 | 0.5     | 0.5     |  |
| 0.56214 | 0.6458  | 0       | 0       | 0       | 0       |  |
| 0       | 0       | 0       | 0       | 0       | 0       |  |
| 0       | 0       | 0       | 0.36774 | 0.3586  | 0.33333 |  |
| 0.56531 | 0.56729 | 0.44117 | 0.5     | 0.4893  | 0.5     |  |
| 0.53544 | 0.49986 | 0.51023 | 0.44626 | 0.51889 | 0.52663 |  |
| 0.39488 | 0.5     | 0.41687 | 0.38959 | 0.5     | 0.42888 |  |
| 0.5     | 0.50802 | 0       | 0       | 0       | 0       |  |
| 0       | 0       | 0       | 0       | 0       | 0       |  |
| 0       | 0       | 0       | 0       | 0.52988 | 0.5     |  |
| 0.53993 | 0.52261 | 0.47346 | 0.5     | 0.44652 | 0.5     |  |
| 0.5     | 0.37131 | 0.5     | 0.58076 | 0.5     | 0.50717 |  |
| 0.5     | 0.50488 | 0.46046 | 0.5415  | 0.50354 | 0.48496 |  |
| 0.5     | 0.5     | 0.5     | 0       | 0       | 0       |  |
| 0       | 0       | 0       | 0       | 0       | 0       |  |
| 0       | 0       | 0       | 0       | 0.58781 | 0.55462 |  |
| 0.48191 | 0.57461 | 0.46072 | 0.46294 | 0.56917 | 0.41259 |  |
| 0.48454 | 0.43185 | 0.5     | 0.48028 | 0.48164 | 0.5     |  |



|         |         |         |         |         |         |     |     |
|---------|---------|---------|---------|---------|---------|-----|-----|
| 0       | 0       | 0       | 0       | 0       | 0       | 0   | 0   |
| 0       | 0       | 0       | 0       | 0       | 0       | 0   | 0   |
| 0       | 0       | 0       | 0       | 0       | 0       | 0   | 0   |
| 0       | 0       | 0       | 0       | 0       | 0       | 0   | 0   |
| 0       | 0       | 0       | 0       | 0       | 0       | 0   | 0   |
| 0       | 0       | 0       | 0       | 0       | 0       | 0   | 0   |
| 0       | 0       | 0       | 0       | 0       | 0       | 0   | 0   |
| 0       | 0       | 0       | 0       | 0       | 0       | 0   | 0   |
| 0       | 0       | 0       | 0       | 0       | 0       | 0   | 0   |
| 0       | 0       | 0       | 0       | 0       | 0       | 0   | 0   |
| gtSp=0  | 0       | 0       | 0       | 0       | 0       | 0   | 0   |
| 0       | 0       | 0       | 0       | 0       | 0       | 0   | 0   |
| 0       | 0       | 0       | 0       | 0       | 0       | 0   | 0   |
| 0       | 0       | 0.42821 | 0.55234 | 0.42443 | 0.49331 | 0   | 0   |
| 0       | 0       | 0       | 0       | 0       | 0       | 0   | 0   |
| 0       | 0       | 0       | 0       | 0       | 0       | 0   | 0   |
| 0       | 0       | 0       | 1       | 0.5     | 0.51897 | 0   | 0   |
| 0.5     | 0.60067 | 0.49031 | 0.57536 | 0       | 0       | 0   | 0   |
| 0       | 0       | 0       | 0       | 0       | 0       | 0   | 0   |
| 0       | 0       | 0       | 0       | 0       | 0       | 0   | 0   |
| 0       | 1       | 1       | 0.49202 | 0.5     | 0.5     | 0   | 0   |
| 0.54339 | 0.57537 | 0.40696 | 0.43022 | 0.5     | 0.5     | 0   | 0   |
| 0       | 0       | 0       | 0       | 0       | 0       | 0   | 0   |
| 0       | 0       | 0       | 0       | 0       | 0       | 0   | 0   |
| 0       | 0       | 1       | 1       | 1       | 0.49811 | 0   | 0   |
| 0.56142 | 0.44314 | 0.41918 | 0.5     | 0.55039 | 0.5     | 0.5 | 0.5 |
| 0.33247 | 0.65401 | 0       | 0       | 0       | 0       | 0   | 0   |
| 0       | 0       | 0       | 0       | 0       | 0       | 0   | 0   |
| 0       | 0       | 0       | 0       | 0       | 0       | 0   | 0   |
| 1       | 1       | 1       | 1       | 0.42361 | 0.48191 | 0   | 0   |
| 0.5     | 0.54934 | 0.54079 | 0.5419  | 0.5     | 0.46574 | 0   | 0   |
| 0.5     | 0.5     | 0       | 0       | 0       | 0       | 0   | 0   |
| 0       | 0       | 0       | 0       | 0       | 0       | 0   | 0   |
| 0       | 0       | 0       | 0       | 0       | 0       | 0   | 0   |
| 1       | 1       | 1       | 1       | 1       | 1       | 1   | 1   |
| 0.53575 | 0.29982 | 0.37191 | 0.45504 | 0.5     | 0.54518 | 0   | 0   |
| 0.5     | 0.42616 | 0.40497 | 0.56767 | 0       | 0       | 0   | 0   |
| 0       | 0       | 0       | 0       | 0       | 0       | 0   | 0   |
| 0       | 0       | 0       | 0       | 0       | 0       | 0   | 0   |
| 0       | 0       | 0       | 1       | 1       | 1       | 1   | 1   |
| 1       | 1       | 1       | 0.51682 | 0.53306 | 0.5     | 0.5 | 0.5 |
| 0.5     | 0.47439 | 0.60249 | 0.5008  | 0.48252 | 0.67128 | 0   | 0   |
| 0.46977 | 0.49048 | 0       | 0       | 0       | 0       | 0   | 0   |
| 0       | 0       | 0       | 0       | 0       | 0       | 0   | 0   |
| 0       | 0       | 0       | 0       | 0       | 0       | 0   | 0   |
| 0       | 1       | 1       | 1       | 1       | 1       | 1   | 1   |
| 1       | 1       | 0.5     | 0.5     | 0.56648 | 0.43577 | 0   | 0   |
| 0.4885  | 0.50803 | 0.53231 | 0.57852 | 0.62042 | 0.5     | 0.5 | 0.5 |
| 0.47262 | 0       | 0       | 0       | 0       | 0       | 0   | 0   |
| 0       | 0       | 0       | 0       | 0       | 0       | 0   | 0   |
| 0       | 0       | 0       | 0       | 0       | 0       | 0   | 0   |
| 0       | 1       | 1       | 1       | 1       | 1       | 1   | 1   |
| 1       | 1       | 0.43479 | 0.34985 | 0.53405 | 0.49417 | 0   | 0   |

|         |         |         |         |         |         |
|---------|---------|---------|---------|---------|---------|
| 0.52197 | 0.62463 | 0.36577 | 0.44831 | 0.52594 | 0.5     |
| 0.48681 | 0       | 0       | 0       | 0       | 0       |
| 0       | 0       | 0       | 0       | 0       | 0       |
| 0       | 0       | 0       | 0       | 0       | 0       |
| 0       | 0       | 1       | 1       | 1       | 1       |
| 1       | 1       | 1       | 0.491   | 0.5     | 0.52107 |
| 0.53855 | 0.5     | 0.5     | 0.53674 | 0.50336 | 0.56826 |
| 0.50847 | 0.56484 | 0.5     | 0       | 0       | 0       |
| 0       | 0       | 0       | 0       | 0       | 0       |
| 0       | 0       | 0       | 0       | 0       | 0       |
| 0       | 0       | 0       | 1       | 1       | 1       |
| 1       | 1       | 1       | 1       | 0.5     | 0.44015 |
| 0.49637 | 0.58699 | 0.59936 | 0.47525 | 0.48694 | 0.50754 |
| 0.53533 | 0.50923 | 0.31023 | 0.4516  | 0       | 0       |
| 0       | 0       | 0       | 0       | 0       | 0       |
| 0       | 0       | 0       | 0       | 0       | 0       |
| 0       | 0       | 0       | 0       | 1       | 1       |
| 1       | 1       | 1       | 1       | 1       | 1       |
| 1       | 0.49283 | 0.53985 | 0.5     | 0.50029 | 0.5     |
| 0.38353 | 0.58552 | 0.52781 | 0.50204 | 0.44147 | 0.50919 |
| 0       | 0       | 0       | 0       | 0       | 0       |
| 0       | 0       | 0       | 0       | 0       | 0       |
| 0       | 0       | 0       | 0       | 0       | 0       |
| 1       | 1       | 1       | 1       | 1       | 1       |
| 1       | 1       | 1       | 0.5     | 0.5     | 0.31931 |
| 0.35073 | 0.34521 | 0.26609 | 0.38605 | 0.28804 | 0.34335 |
| 0.33333 | 0.33333 | 0       | 0       | 0       | 0       |
| 0       | 0       | 0       | 0       | 0       | 0       |
| 0       | 0       | 0       | 0       | 0       | 0       |
| 0       | 0       | 1       | 1       | 1       | 1       |
| 1       | 1       | 1       | 1       | 1       | 0.48056 |
| 0.33827 | 0.39494 | 0.44886 | 0.41281 | 0.3263  | 0.36221 |
| 0.24444 | 0.28944 | 0.34072 | 0.40412 | 0       | 0       |
| 0       | 0       | 0       | 0       | 0       | 0       |
| 0       | 0       | 0       | 0       | 0       | 0       |
| 0       | 0       | 0       | 0       | 1       | 1       |
| 1       | 1       | 1       | 1       | 1       | 0.34412 |
| 0.59773 | 0.55114 | 0.33889 | 0.23864 | 0.3373  | 0.34419 |
| 0.39486 | 0.33287 | 0.34658 | 0.19674 | 0.22444 | 0.32103 |
| 0       | 0       | 0       | 0       | 0       | 0       |
| 0       | 0       | 0       | 0       | 0       | 0       |
| 0       | 0       | 0       | 0       | 0       | 0       |
| 1       | 1       | 1       | 1       | 1       | 1       |
| 0.42484 | 0.5     | 0.55358 | 0.5     | 0.62421 | 0.41828 |
| 0.33333 | 0.25439 | 0.33302 | 0.29328 | 0.27279 | 0.34403 |
| 0.31165 | 0.323   | 0       | 0       | 0       | 0       |
| 0       | 0       | 0       | 0       | 0       | 0       |
| 0       | 0       | 0       | 0       | 0       | 0       |
| 0       | 0       | 1       | 1       | 1       | 1       |
| 1       | 0.52044 | 0.5     | 0.55485 | 0.5     | 0.55365 |
| 0.58255 | 0.2014  | 0.34477 | 0.33708 | 0.29961 | 0.35743 |
| 0.33333 | 0.43    | 0.3619  | 0.34574 | 0       | 0       |

|         |         |         |         |         |         |   |
|---------|---------|---------|---------|---------|---------|---|
| 0       | 0       | 0       | 0       | 0       | 0       | 0 |
| 0       | 0       | 0       | 0       | 0       | 0       | 0 |
| 0       | 0       | 0       | 0       | 0       | 1       | 1 |
| 1       | 0.5     | 0.48444 | 0.45505 | 0.5     | 0.52737 |   |
| 0.5     | 0.52548 | 0.5     | 0.35914 | 0.37487 | 0.33333 |   |
| 0.37741 | 0.32819 | 0.33333 | 0.34374 | 0.36414 | 0.33711 |   |
| 0       | 0       | 0       | 0       | 0       | 0       |   |
| 0       | 0       | 0       | 0       | 0       | 0       |   |
| 0       | 0       | 0       | 0       | 0       | 0       |   |
| 1       | 0.44926 | 0.50807 | 0.47788 | 0.55985 | 0.45804 |   |
| 0.49916 | 0.5     | 0.44329 | 0.51203 | 0.37653 | 0.37299 |   |
| 0.27163 | 0.35972 | 0.28571 | 0.31095 | 0.28626 | 0.30249 |   |
| 0.33754 | 0       | 0       | 0       | 0       | 0       | 0 |
| 0       | 0       | 0       | 0       | 0       | 0       |   |
| 0       | 0       | 0       | 0       | 0       | 0       |   |
| 0       | 0.40722 | 0.52935 | 0.62083 | 0.5     | 0.40762 |   |
| 0.49665 | 0.5     | 0.49241 | 0.59921 | 0.5247  | 0.30818 |   |
| 0.36449 | 0.26674 | 0.35316 | 0.28326 | 0.33845 | 0.35465 |   |
| 0.3714  | 0.33333 | 0       | 0       | 0       | 0       |   |
| 0       | 0       | 0       | 0       | 0       | 0       |   |
| 0       | 0       | 0       | 0       | 0       | 0       |   |
| 0       | 0       | 0.6007  | 0.41615 | 0.5     | 0.5     |   |
| 0.48769 | 0.50527 | 0.50441 | 0.4995  | 0.51734 | 0.54837 |   |
| 0.32065 | 0.35649 | 0.33333 | 0.33333 | 0.35959 | 0.37337 |   |
| 0.3044  | 0.32002 | 0       | 0       | 0       | 0       |   |
| 0       | 0       | 0       | 0       | 0       | 0       |   |
| 0       | 0       | 0       | 0       | 0       | 0       |   |
| 0       | 0       | 0       | 0.48954 | 0.5058  | 0.45472 |   |
| 0.39059 | 0.53408 | 0.5     | 0.53469 | 0.60242 | 0.5     |   |
| 0.49062 | 0.2864  | 0.35417 | 0.29644 | 0.34405 | 0.34864 |   |
| 0.34119 | 0.37636 | 0.33444 | 0       | 0       | 0       |   |
| 0       | 0       | 0       | 0       | 0       | 0       |   |
| 0       | 0       | 0       | 0       | 0       | 0       |   |
| 0       | 0       | 0       | 0       | 0       | 0.44592 |   |
| 0.5     | 0.5     | 0.45567 | 0.5     | 0.765   | 0.57221 |   |
| 0.58371 | 0.52435 | 0.33199 | 0.2911  | 0.35145 | 0.35472 |   |
| 0.3795  | 0.39268 | 0       | 0       | 0       | 0       | 0 |
| 0       | 0       | 0       | 0       | 0       | 0       |   |
| 0       | 0       | 0       | 0       | 0       | 0       |   |
| 0       | 0       | 0       | 0       | 0       | 0       |   |
| 0.46728 | 0.57617 | 0.47371 | 0.47143 | 0.5     | 0.49567 |   |
| 0.41725 | 0.65048 | 0.48312 | 0.31631 | 0.26387 | 0.33333 |   |
| 0       | 0       | 0       | 0       | 0       | 0       |   |
| 0       | 0       | 0       | 0       | 0       | 0       |   |
| 0       | 0       | 0       | 0       | 0       | 0       |   |
| 0       | 0       | 0       | 0       | 0       | 0       |   |
| 0       | 0       | 0.53515 | 0.45459 | 0.5     | 0.54913 |   |
| 0.5     | 0.5     | 0.55308 | 0.5     | 0       | 0       |   |
| 0       | 0       | 0       | 0       | 0       | 0       |   |
| 0       | 0       | 0       | 0       | 0       | 0       |   |
| 0       | 0       | 0       | 0       | 0       | 0       |   |
| 0       | 0       | 0       | 0       | 0       | 0       |   |



|   |   |   |   |   |   |   |
|---|---|---|---|---|---|---|
| 0 | 0 | 0 | 0 | 0 | 0 | 0 |
| 0 | 0 | 0 | 0 | 0 | 0 | 0 |
| 0 | 0 | 0 | 0 | 0 | 0 | 0 |
| 0 | 0 | 0 | 0 | 0 | 0 | 0 |
| 0 | 0 | 0 | 0 | 0 | 0 | 0 |
| 0 | 0 | 0 | 0 | 0 | 0 | 0 |
| 0 | 0 | 0 | 0 | 0 | 0 | 0 |
| 0 | 0 | 0 | 0 | 0 | 0 | 0 |
| 0 | 0 | 0 | 0 | 0 | 0 | 0 |
| 0 | 0 | 0 | 0 | 0 | 0 | 0 |
| 0 | 0 | 0 | 0 | 0 | 0 | 0 |
| 0 | 0 | 0 | 0 | 0 | 0 | 0 |
| 0 | 0 | 0 | 0 | 0 | 0 | 0 |
| 0 | 0 | 0 | 0 | 0 | 0 | 0 |

gtTCf=

0  
0.1908  
0.21796  
0.19252  
0.15724  
0.12639  
0.10315  
0.086848  
0.075855  
0.068599  
0.063857  
0.060755  
0.058703  
0.057315  
0.056342  
0.055627  
0.055072  
0.054617

gtTCs=

0  
0.11925  
0.16824  
0.18061  
0.17524  
0.16239  
0.14746  
0.13307  
0.12035  
0.10964  
0.10088  
0.093851  
0.08828  
0.08389  
0.08044  
0.077724  
0.075577

0.073866

gtTCp=

0  
2.385  
1.5979  
1.1196  
0.8287  
0.65143  
0.54309  
0.47655  
0.43538  
0.4096  
0.39316  
0.38239  
0.37506  
0.36982  
0.36585  
0.36266  
0.35995  
0.35753

X\_mask=

0.0010881, 2.2204e-  
016, 0.00059867, 0.00088451, 0.00070139, 0.00043338, 0.00057163, 0.0028128, 0  
.0010659, 2.2204e-016, 0.0016612, 0.0003566, 0.0013357, 2.2204e-  
016, 0.00026224, 0.002012, 2.2204e-016, 5.1702e-  
005, 0.0016969, 0.00076599, 0.020178, 2.2204e-016, 2.2204e-016, 2.2204e-  
016, 0.00046738, 0.001283, 2.2204e-016, 2.2204e-016, 2.2204e-016, 2.2204e-  
016, 2.2204e-016, 2.2204e-016, 0.0034859, 2.2204e-016, 2.2204e-  
016, 0.0020708, 2.2204e-016, 2.2204e-016, 0.00053956, 0.012724, 2.2204e-  
016, 2.2204e-016, 2.2204e-016, 2.2204e-016, 0.018712, 2.2204e-016, 2.2204e-  
016, 2.2204e-016, 2.2204e-016, 2.2204e-016, 2.2204e-016, 2.2204e-  
016, 2.2204e-016, 2.2204e-016, 2.2204e-016, 0.0011067, 0.0031879, 2.2204e-  
016, 0.000288, 0.0020286, 3.7644e-005, 0.0038663, 2.2204e-  
016, 0.0026477, 2.2204e-016, 2.2204e-016, 0.020543, 2.2204e-016, 2.2204e-  
016, 2.2204e-016, 2.2204e-  
016, 0.00098497, 0.00021961, 0.0030217, 0.00036301, 2.2204e-016, 2.2204e-  
016, 2.2204e-016, 0.00046684, 2.2204e-016, 0.0012032, 0.00064791, 2.2204e-  
016, 2.2204e-016, 2.2204e-016, 2.2204e-016, 2.2204e-016, 2.2204e-  
016, 0.03717, 0.0028803, 2.2204e-016, 2.2204e-016, 0.010287, 2.2204e-  
016, 2.2204e-016, 2.2204e-016, 0.0056257, 2.2204e-016, 2.2204e-  
016, 0.0015927, 0.0010887, 0.0006145, 2.2204e-016, 0.00054363, 3.253e-  
005, 0.0035269, 0.0020032, 2.2204e-016, 2.2204e-016, 2.2204e-  
016, 0.0012275, 0.0005726, 2.2204e-016, 0.0024538, 0.030669, 2.2204e-  
016, 0.0076386, 0.033902, 0.0047093, 0.018089, 0.00060247, 2.2204e-  
016, 0.016628, 0.0033113, 0.0071771, 0.0064663, 2.2204e-016, 2.2204e-  
016, 0.0020624, 0.00094768, 0.00064044, 2.2204e-  
016, 0.0027521, 0.0010651, 0.0021401, 2.2204e-016, 2.2204e-016, 2.2204e-  
016, 2.2204e-016, 2.2204e-016, 0.00012317, 2.2204e-016, 0.00024497, 2.2204e-  
016, 0.023214, 2.2204e-016, 2.2204e-016, 0.019534, 2.2204e-  
016, 0.0050728, 2.2204e-016, 2.2204e-016, 2.2204e-016, 2.2204e-



016,0.0019527,0.0066495,2.2204e-016,0.0012849,2.2204e-016,2.2204e-  
016,2.2204e-016,2.2204e-016,2.2204e-  
016,0.00067935,0.0020925,0.00072699,0.001185,2.2204e-  
016,0.0018809,0.00040467,0.00058198,2.2204e-016,0.0011287,2.2204e-  
016,2.2204e-016,0.0010221,2.2204e-016,0.0019165,2.2204e-016,2.2204e-  
016,2.2204e-016,0.025363,0.0076998,2.2204e-  
016,0.0063238,0.0011176,2.2204e-016,2.2204e-016,2.2204e-  
016,0.0096014,2.2204e-016,0.00099256,0.00025428,0.0057792,2.2204e-  
016,0.00039833,2.2204e-016,0.0010315,0.0034268,2.2204e-  
016,0.0022803,0.0028339,5.5219e-005,0.0032444,2.2204e-  
016,0.002356,0.00056816,2.2204e-016,0.00063614,2.2204e-016,2.2204e-  
016,0.01312,2.2204e-016,2.2204e-  
016,0.0058962,0.0037601,0.030344,2.2204e-016,2.2204e-016,2.2204e-  
016,0.00072157,2.2204e-016,2.2204e-016,0.0077658,2.2204e-016,2.2204e-  
016,0.0085099,0.011542,0.0020119,0.00043687,0.00056743,2.2204e-  
016,0.0015409,2.2204e-016,0.00051001,2.2204e-016,2.2204e-  
016,0.0012233,0.0011692,0.0013416,2.2204e-016,0.0028928,2.2204e-  
016,0.0008249,2.2204e-016,0.0022702,0.00015446,2.2204e-  
016,0.0078091,0.02495,0.0069987,0.0014492,2.2204e-  
016,0.012474,2.2204e-016,0.0042002,0.013819,2.2204e-  
016,0.0024761,0.0057544,2.2204e-016,0.00024014,2.2204e-  
016,0.0033918,2.2204e-016,0.0014862,2.2204e-016,2.2204e-  
016,0.00044868,2.2204e-016,6.7713e-005,2.2204e-016,2.2204e-  
016,0.0014352,2.2204e-016,2.2204e-016,2.2204e-016,2.2204e-  
016,0.0014798,2.2204e-016,2.2204e-016,2.2204e-016,0.00017447,2.2204e-  
016,2.2204e-016,2.2204e-016,2.2204e-016,2.2204e-016,2.2204e-  
016,0.022863,0.026464,3.8996e-005,2.2204e-016,2.2204e-016,2.2204e-  
016,2.2204e-016,0.0028988,0.0012829,2.2204e-016,0.0046446,2.2204e-  
016,2.2204e-016,0.0061873,0.0017107,2.2204e-016,0.00021381,2.8621e-  
005,2.2204e-016,0.00026281,2.2204e-016,2.2204e-016,2.2204e-  
016,0.0023738,2.2204e-016,2.2204e-016,0.0028055,2.2204e-  
016,0.00043556,0.0013739,0.0027057,0.0015145,2.2204e-016,2.2204e-  
016,2.2204e-016,2.2204e-016,0.0045092,2.2204e-016,2.2204e-016,2.2204e-  
016,2.2204e-016,0.0036558,2.2204e-016,2.2204e-016,0.0041327,2.2204e-  
016,0.001996,2.2204e-016,2.2204e-016,2.2204e-016,0.0094837,2.2204e-  
016,2.2204e-  
016,0.0034859,0.0015415,0.0015987,0.0012857,0.0011122,2.2204e-  
016,2.2204e-016,6.4108e-  
005,0.0015984,0.0014663,0.00070368,0.0019653,2.2204e-  
016,0.00048188,0.00043509,2.2204e-  
016,0.022219,0.019001,0.018684,2.2204e-016,2.2204e-  
016,0.0011209,0.0074615,2.2204e-016,0.0078532,0.0015347,2.2204e-  
016,0.0013178,0.0036203,0.0033577,0.010893,2.2204e-  
016,0.014237,2.2204e-016,2.2204e-016,2.2204e-016,4.9233e-005,2.2204e-  
016,0.0034797,0.0031392,0.0019901,0.0013325,0.0015293,2.2204e-  
016,2.2204e-016,0.0022555,2.2204e-016,0.0018622,2.2204e-  
016,0.0022688,2.2204e-016,0.00029649,0.00026805,2.2204e-  
016,0.023858,0.00095336,2.2204e-016,0.0016174,0.0085288,2.2204e-  
016,0.0022262,0.0074295,0.014665,2.2204e-  
016,0.0035938,0.014859,0.0023104,0.0053493,2.2204e-  
016,0.0053287,2.2204e-016,2.2204e-  
016,0.0020742,0.00083847,0.0011677,2.2204e-016,2.2204e-

016,0.0016974,0.0013939,2.2204e-016,0.0014797,0.0023094,2.2204e-  
016,2.2204e-016,0.0021734,2.2204e-016,2.2204e-  
016,0.00025176,0.0032198,2.2204e-016,2.2204e-  
016,0.0013559,0.021144,2.2204e-016,0.00175,0.0071933,2.2204e-  
016,0.028004,0.024683,2.2204e-016,2.2204e-016,2.2204e-  
016,0.0024953,2.2204e-016,2.2204e-016,0.010552,0.0040763,2.2204e-  
016,2.2204e-016,2.2204e-016,2.2204e-016,0.0012988,0.0018263,2.2204e-  
016,0.0012006,0.00020398,0.0012947,0.0023494,2.2204e-016,2.2204e-  
016,0.0014207,2.2204e-016,2.2204e-  
016,0.0014122,0.00054877,0.0022795,0.0030761,2.2204e-  
016,0.0023542,0.00049988,2.2204e-016,0.00087739,2.2204e-  
016,0.010861,0.0084918,0.025416,0.0064997,0.0037185,0.0092356,2.2204e-  
016,0.00072294,0.0056236,0.0090318,2.2204e-  
016,0.010299,0.0098219,0.0096218,2.2204e-  
016,0.0090594,0.01677,0.00064959,0.0019531,0.0016264,0.0017521,2.2204e-  
-016,0.00092491,2.2204e-016,2.2204e-016,2.2204e-016,2.2204e-  
016,2.2204e-016,2.2204e-016,2.2204e-016,2.2204e-016,2.2204e-  
016,0.001146,2.2204e-016,2.2204e-016,0.010429,0.0039274,2.2204e-  
016,2.2204e-016,2.2204e-016,2.2204e-016,2.2204e-016,2.2204e-  
016,2.2204e-016,0.0053854,2.2204e-016,2.2204e-016,2.2204e-016,2.2204e-  
016,2.2204e-  
016,0.00059483,0.00017575,0.0029767,0.0010595,0.007001,0.00069303,2.22  
04e-016,2.2204e-016,2.2204e-016,0.0019762,0.00057648,2.2204e-  
016,0.0028653,2.2204e-016,0.0013807,2.2204e-016,0.0031027,2.2204e-  
016,2.2204e-016,2.2204e-016,0.001626,2.2204e-016,2.2204e-016,2.2204e-  
016,0.024263,0.0044352,2.2204e-016,2.2204e-016,2.2204e-016,2.2204e-  
016,0.001297,0.0019902,0.011313,2.2204e-016,0.00035853,2.2204e-  
016,0.0038554,2.2204e-016,0.0043157,2.2204e-016,2.2204e-016,2.2204e-  
016,2.2204e-016,0.004217,2.2204e-016,2.2204e-016,2.2204e-  
016,0.00014035,7.45e-  
005,0.00084515,0.0014477,0.00048091,0.00079538,0.0011342,0.00086305,2.  
2204e-016,2.2204e-016,0.0020122,0.0021523,2.2204e-016,2.2204e-  
016,2.2204e-016,2.2204e-016,0.033953,0.013417,2.2204e-  
016,0.0072829,2.2204e-016,2.2204e-016,2.2204e-  
016,0.016328,0.025384,0.0022011,0.0038655,0.0060959,0.005814,0.0056084  
,2.2204e-016,0.0056647,2.2204e-016,0.017094,0.0024785,2.2204e-  
016,0.0025281,2.2204e-016,0.00018743,2.2204e-016,5.7061e-  
005,0.002863,2.2204e-016,0.00052233,2.2204e-016,2.2204e-016,2.2204e-  
016,0.00077969,0.00039002,2.2204e-016,0.00083885,0.00072056,2.2204e-  
016,2.2204e-016,0.0061738,0.0051981,0.00019011,2.2204e-  
016,0.013992,2.2204e-016,0.0091573,2.2204e-016,0.0054419,2.2204e-  
016,0.0027848,0.0056257,0.0042973,2.2204e-016,2.2204e-  
016,0.0052045,2.2204e-016,0.002507,2.2204e-  
016,0.0023874,0.00069104,0.00087337,2.2204e-016,0.0014257,7.0665e-  
005,0.002243,8.0105e-005,2.2204e-016,4.9364e-005,2.2204e-  
016,0.0044558,2.2204e-016,0.00043897,2.2204e-016,2.2204e-  
016,0.0097348,0.019352,0.0052741,0.0021009,2.2204e-  
016,0.0034249,2.2204e-016,2.2204e-016,0.0062854,2.2204e-  
016,0.0065797,0.0043629,2.2204e-016,0.007959,2.2204e-016,2.2204e-  
016,0.0028598,2.2204e-016,8.0354e-005,0.00074745,0.00089114,2.2204e-  
016,0.00028764,2.2204e-016,2.2204e-016,2.2204e-016,0.0020528,2.2204e-  
016,0.0013812,2.2204e-016,0.0023428,0.0023275,0.00046469,2.2204e-

016,0.00082438,2.2204e-016,0.00097677,2.2204e-016,0.0046308,2.2204e-016,2.2204e-016,0.0020997,2.2204e-016,2.2204e-016,2.2204e-016,2.2204e-016,0.0011228,0.018328,0.00059541,0.0031052,2.2204e-016,2.2204e-016,2.2204e-016,2.2204e-016,2.2204e-016,2.2204e-016,0.0012006,0.0024466,2.2204e-016,2.2204e-016,0.0012717,2.2204e-016,0.0024707,0.00070473,2.2204e-016,2.2204e-016,0.0017142,2.2204e-016,2.2204e-016,0.00098733,2.2204e-016,1.9603e-005,2.2204e-016,0.00036489,2.2204e-016,2.2204e-016,0.0094608,0.00033278,0.0021755,2.2204e-016,0.0014627,2.2204e-016,0.021835,2.2204e-016,0.0094416,2.2204e-016,0.0060979,2.2204e-016,0.0065563,0.005338,2.2204e-016,2.2204e-016,2.2204e-016,2.2204e-016,0.0015084,2.2204e-016,2.2204e-016,0.00083776,2.2204e-016,0.0019646,2.2204e-016,0.0015518,0.0018,2.2204e-016,2.2204e-016,0.0011916,2.2204e-016,2.2204e-016,2.2204e-016,2.2204e-016,0.0017843,0.0015744,2.2204e-016,0.0019816,0.0001524,0.00025819,2.2204e-016,0.0016259,0.01255,0.0022151,0.0032143,0.0081763,0.0068332,2.2204e-016,0.015016,2.2204e-016,0.0020144,0.011396,2.2204e-016,2.2204e-016,0.00075629,0.00167,2.2204e-016,0.00044273,2.2204e-016,2.2204e-016,0.00011465,2.2204e-016,0.00088258,3.4569e-005,0.00044805,2.2204e-016,2.2204e-016,0.0021694,0.0020917,2.2204e-016,0.0012277,2.2204e-016,2.2204e-016,2.2204e-016,0.0022828,2.2204e-016,2.2204e-016,0.0053485,0.0026802,0.0089941,2.2204e-016,2.2204e-016,0.0013083,2.2204e-016,0.012805,2.2204e-016,0.0042102,0.0082033,2.2204e-016,2.2204e-016,0.00010428,1.9233e-005,2.2204e-016,0.00049469,0.00047144,2.2204e-016,2.2204e-016,2.2204e-016,2.2204e-016,2.2204e-016,0.0010971,0.0014298,2.2204e-016,0.00211,2.2204e-016,0.00017358,2.2204e-016,0.00081993,0.0012933,2.2204e-016,0.00013624,2.2204e-016,2.2204e-016,2.2204e-016,2.2204e-016,2.2204e-016,2.2204e-016,2.2204e-016,2.2204e-016,0.019025,0.0002375,2.2204e-016,0.00023699,2.2204e-016,0.00082945,2.2204e-016,0.0010543,0.0034314,0.0022676,0.00028081,0.0011228,0.0016424,0.0014461,2.2204e-016,0.0023387,0.002759,0.0016516,0.00043133,0.00041921,2.2204e-016,2.2204e-016,2.2204e-016,0.0011742,2.2204e-016,2.2204e-016,2.2204e-016,0.0024003,0.0001217,0.0036079,0.0096589,2.2204e-016,0.0020922,0.0011591,2.2204e-016,2.2204e-016,2.2204e-016,2.2204e-016,2.2204e-016,3.0632e-005,0.00069245,0.0014433,2.2204e-016,0.0030737,2.2204e-016,0.00072016,2.2204e-016,0.00099229,2.2204e-016,0.00012615,2.2204e-016,0.00021224,2.2204e-016,2.2204e-016,0.00074102,0.00063286,0.0025824,0.00021233,2.2204e-016,2.2204e-016,2.2204e-016,2.2204e-016,2.2204e-016,1.232e-005,2.2204e-016,2.2204e-016,2.2204e-016,0.0031168,0.01313,2.2204e-016,0.0023092,0.002125,2.2204e-016,0.00079394,0.00018552,0.0032933,2.2204e-016,2.2204e-016,2.2204e-016,2.2204e-016,2.2204e-016,2.2204e-016,0.0036737,2.2204e-016,2.2204e-016,0.00047085,2.2204e-016,2.2204e-016,0.0029004,0.0011772,0.00052732,0.00060686,2.2204e-016,2.2204e-016,0.0019878,0.0010353,0.00082585,0.0010785,0.0022376,2.2204e-016,0.00078911,0.00033837,2.2204e-016,2.2204e-016,0.00013227,2.2204e-016,2.2204e-016,2.2204e-016,2.2023e-005,0.0030019,2.2204e-016,2.2204e-016

016,0.0027774,2.2204e-016,2.2204e-016,0.0013249,2.2204e-  
016,0.0017721,2.2204e-016,0.0012716,3.8897e-  
005,0.0017294,0.0042861,0.0023063,0.0024656,2.2204e-016,2.2204e-  
016,2.2204e-016,2.2204e-016,2.2204e-016,2.2204e-016,2.2204e-  
016,2.2204e-016,0.0013451,2.2204e-016,2.2204e-016,2.2204e-016,2.2204e-  
016,2.2204e-016,2.2204e-016,0.0024461,0.0015333,0.0029558,2.2204e-  
016,0.0034517,2.2204e-016,2.2204e-016,0.0018354,2.2204e-016,2.2204e-  
016,0.0017293,0.0004922,0.0014412,0.00034049,2.2204e-  
016,0.00049832,2.2204e-016,2.2204e-016,0.00041067,2.2204e-  
016,0.001028,2.2204e-016,0.00042012,2.2204e-016,2.2204e-  
016,0.0025946,0.00018762,2.2204e-016,2.2204e-  
016,0.00087785,0.00169,0.0016638,0.00056374,2.2204e-016,2.2204e-  
016,0.00068958,2.2204e-016,2.2204e-016,2.2204e-016,0.0014226,2.2204e-  
016,2.2204e-016,2.2204e-016,2.2204e-016,0.0014138,2.2204e-016,2.2204e-  
016,0.0022159,0.00097048,0.0033854,0.0018892,2.2204e-016,2.2204e-  
016,2.2204e-016,0.00012964,2.2204e-016,2.2204e-016,2.2204e-  
016,2.2204e-016,2.2204e-016,2.2204e-016,2.2204e-016,0.0011273,2.2204e-  
016,2.2204e-016,0.003865,0.0017907,2.2204e-  
016,0.0016392,0.0028107,0.00096762,2.2204e-016,2.2204e-  
016,0.0016388,0.0011832,0.00080319,2.2204e-016,2.2204e-016,2.2204e-  
016,2.2204e-016,2.2204e-016,0.0020049,0.0018662,2.2204e-  
016,0.0016608,2.2204e-016,0.0033523,0.0015945,2.2204e-  
016,0.00094151,0.0046761,2.2204e-016,2.2204e-016,2.2204e-016,2.2204e-  
016,2.2204e-016,2.2204e-016,0.0013514,0.00066902,2.2204e-016,2.2204e-  
016,0.00023137,0.00087252,2.2204e-016,0.00080893,0.0033313,2.2204e-  
016,0.0025006,2.2204e-016,5.4897e-005,2.2204e-016,0.0026968,2.2204e-  
016,0.00054121,2.2204e-016,0.0027563,2.2204e-016,2.2204e-016,2.2204e-  
016,0.0003074,2.2204e-016,2.2204e-016,2.2204e-016,2.2204e-  
016,0.00090081,0.0010728,2.2204e-016,2.2204e-  
016,0.002137,0.0010269,0.0016788,2.2204e-  
016,0.0011986,0.00011444,2.2204e-016,2.2204e-016,2.2204e-  
016,0.000472,0.0020124,2.2204e-016,0.00079052,2.2204e-  
016,0.00069619,2.2204e-016,2.2204e-016,2.2204e-016,0.0033606,2.2204e-  
016,2.2204e-016,0.0030898,0.0018148,2.2204e-016,2.2204e-016,2.2204e-  
016,2.2204e-016,0.0012226,2.2204e-016,2.2204e-016,2.2204e-  
016,0.0009628,0.00025873,2.2204e-016,2.2204e-  
016,0.0005334,0.0038439,0.00036271,2.2204e-016,2.2204e-  
016,0.0035307,2.2204e-016,2.2204e-016,0.0009705,2.2204e-016,2.2204e-  
016,2.2204e-016,2.2204e-016,0.00086345,0.0014323,2.2204e-016,2.2204e-  
016,2.2204e-016,2.2204e-016,0.0051746,2.2204e-  
016,0.0030251,0.0029146,0.0014117,0.00023581,2.2204e-  
016,0.0012488,2.2204e-  
016,0.00037137,0.00033061,0.00033791,0.0019707,0.00020596,0.0050659,2.  
2204e-016,0.00087176,2.2204e-016,0.00014307,2.2204e-  
016,0.0014997,2.2204e-016,2.2204e-016,0.00086767,2.2204e-  
016,0.0017399,2.2204e-016,5.8275e-005,2.2204e-016,2.2204e-  
016,0.002467,0.0041926,0.0015272,0.0012967,0.0032882,2.2204e-  
016,0.0022144,0.00042307,2.2204e-016,2.2204e-016,0.00099172,2.2204e-  
016,0.00030658,2.2204e-  
016,0.0014598,0.001733,0.00079127,0.0031537,2.2204e-  
016,0.0026598,2.2204e-016,0.0004023,0.003111,0.0053399,2.2204e-  
016,0.0010514,2.2204e-

016,0.00094737,0.0013798,0.00041841,0.00032232,2.2204e-016,4.3159e-005,2.2204e-016,2.2204e-016,0.00166,0.0013279,0.0011273,2.2204e-016,2.2204e-016,2.2204e-016,0.00086314,2.2204e-016,2.2204e-016,0.00017642,0.00017861,2.2204e-016,2.2204e-016,0.00096961,2.2204e-016,2.2204e-016,2.2204e-016,2.2204e-016,2.2204e-016,2.2204e-016,2.2204e-016,0.00091042,2.2204e-016  
0.12023,0.11595,0.12049,0.11965,0.11999,0.11973,0.12057,0.12113,0.11964,0.11883,0.12008,0.11907,0.12,0.11811,0.11964,0.12078,0.11705,0.11941,0.12118,0.1203,1.109,1.3621,1.0715,1.2257,0.11927,0.12059,0.11908,0.1181,0.11865,0.11923,0.11724,0.11688,0.12392,0.1176,0.119,0.12114,0.11916,0.11885,0.11906,2.394,1.2501,1.2954,1.2335,1.4728,1.245,1.4162,0.11781,0.11732,0.11798,0.11773,0.11757,0.11814,0.11782,0.11707,0.11874,0.12057,0.12227,0.11612,0.12115,0.12102,0.11976,2.3841,2.3559,1.2403,1.2493,1.2462,1.3675,1.4082,1.0362,1.0746,1.2421,0.11849,0.12002,0.12236,0.11945,0.11984,0.11949,0.11999,0.11919,0.11697,0.11973,0.12002,0.11875,0.11741,0.11976,0.11738,2.3504,2.3478,2.4228,1.2503,1.3881,1.1242,1.0756,1.2468,1.3534,1.2549,0.87721,1.6056,0.11687,0.12025,0.12007,0.11914,0.11936,0.11974,0.12043,0.12221,0.12095,0.11842,0.1189,0.11761,0.12091,0.12027,0.1178,0.12297,2.4137,2.3597,2.3871,2.4211,1.0907,1.2326,1.2551,1.3514,1.3557,1.3382,1.2485,1.1792,1.2462,1.238,0.12004,0.1204,0.12033,0.1184,0.12127,0.12169,0.11999,0.11807,0.1165,0.11924,0.1161,0.11826,0.11927,0.11878,0.11945,0.11824,2.404,2.3753,2.3681,2.4063,2.342,2.3941,1.3299,0.79343,0.95666,1.1269,1.2486,1.3682,1.2504,1.082,1.0205,1.3962,0.1197,0.11897,0.1177,0.119,0.12109,0.12026,0.12002,0.11943,0.12098,0.11927,0.12043,0.11829,0.12034,0.11808,0.11868,0.11915,0.11811,2.3917,2.3546,2.3551,2.3817,2.4025,2.3885,1.2909,1.3353,1.2483,1.2506,1.1769,1.4734,1.2678,1.2057,1.637,1.1868,1.2403,0.11903,0.11899,0.11685,0.12123,0.12261,0.11724,0.12105,0.12191,0.11932,0.12296,0.11954,0.12073,0.11949,0.15206,0.15568,0.1525,0.11852,2.3878,2.3958,2.3842,2.3951,2.39,2.4085,2.3778,1.2377,1.2393,1.4031,1.1063,1.2176,1.2772,1.3183,1.4122,1.5289,1.2648,1.1931,0.11895,0.12069,0.11607,0.12092,0.11825,0.11934,0.11933,0.11743,0.1195,0.11948,0.12134,0.15291,0.15756,0.15309,0.14818,0.15451,0.15737,0.1193,2.382,2.3792,2.3994,2.3926,2.3813,2.3735,2.3907,1.1016,0.92065,1.3417,1.2407,1.3,1.5461,0.94492,1.1335,1.2972,1.2518,1.2201,0.12046,0.11933,0.1187,0.11945,0.11886,0.11852,0.118,0.11883,0.12084,0.15707,0.14741,0.15506,0.1528,0.16014,0.15313,0.15414,0.15468,0.1592,0.11953,2.3542,2.3657,2.3665,2.3814,2.3639,2.411,2.4149,1.2339,1.2545,1.29,1.3313,1.2453,1.2526,1.3337,1.2454,1.4059,1.2582,1.3916,1.2632,0.12096,0.11909,0.11874,0.12011,0.11916,0.11932,0.16275,0.15274,0.15492,0.15974,0.15434,0.15978,0.15628,0.15214,0.15536,0.14999,0.15632,0.15722,2.3554,2.3883,2.3931,2.3986,2.3841,2.3668,2.3992,1.2453,1.1085,1.2481,1.4322,1.4838,1.2029,1.2161,1.2763,1.3379,1.2679,0.81855,1.161,0.11856,0.11892,0.12251,0.15572,0.15714,0.15841,0.15056,0.14518,0.15431,0.15157,0.15677,0.15808,0.1478,0.15605,0.15479,0.15673,0.15438,0.15456,2.4006,2.4002,2.4053,2.3938,2.3821,2.3956,2.3984,2.3818,2.395,1.234,1.3319,1.2444,1.2597,1.2623,0.99973,1.4355,1.3293,1.2499,1.1186,1.2654,0.15149,0.15608,0.16095,0.15845,0.15685,0.15704,0.15731,0.15883,0.1583,0.14834,0.14354,0.15798,0.15427,0.15537,0.15249,0.15441,0.1577,0.1558,2.4052,2.3874,2.3344,2.3918,2.388,2.3674,2.4084,2.3964,2.4005,1.2446,1.252,0.88076,0.93774,0.92387,0.74362,1.0148,0.7938,0.91732,0.8972,0.90286,0.15567,0.16062,0.14731,0.15687,0.158,0.15976,0.15941,0.16971,0.15261,0.15465,0.15013,0.15396,0.1537,0.14946,0.1608,0.14794,0

.16707,0.15207,2.4074,2.3763,2.3827,2.3811,2.3751,2.4034,2.3964,2.3963  
,2.3836,1.2369,0.91177,1.0212,1.1425,1.0777,0.87969,0.95555,0.69728,0.  
80766,0.90802,1.0547,0.16082,0.15442,0.15722,0.15514,0.15566,0.15758,0  
.15668,0.14601,0.15501,0.14715,0.15955,0.1586,0.15166,0.1605,0.15269,0  
.15796,0.15212,0.16237,2.3854,2.3844,2.3804,2.3999,2.3986,2.3889,2.384  
,0.94201,1.5099,1.3969,0.91141,0.68098,0.92083,0.92311,1.0521,0.90454,  
0.93585,0.59193,0.66808,0.88543,0.15169,0.15765,0.15452,0.15895,0.1557  
5,0.1569,0.15838,0.15371,0.15312,0.15627,0.15365,0.15408,0.15361,0.155  
65,0.15725,0.15206,0.15484,0.15111,2.4015,2.3902,2.3769,2.3857,2.3693,  
2.3875,1.1185,1.2647,1.3878,1.2854,1.5506,1.0981,0.89211,0.71851,0.898  
88,0.81319,0.75979,0.92605,0.85216,0.88226,0.15722,0.15289,0.15433,0.1  
5589,0.15464,0.15464,0.15416,0.15917,0.14959,0.15699,0.15658,0.15332,0  
.15334,0.15541,0.15307,0.15239,0.1528,0.16354,2.3573,2.4068,2.3911,2.3  
867,2.3557,1.3302,1.2603,1.4124,1.2932,1.4152,1.4603,0.60852,0.9194,0.  
91002,0.81342,0.95354,0.88886,1.0992,0.96432,0.9149,0.15974,0.15712,0.  
16081,0.15148,0.15697,0.1557,0.15609,0.15723,0.15392,0.15712,0.15541,0  
.15613,0.15278,0.16142,0.16191,0.16887,0.15986,0.15182,2.3543,2.3572,2  
.429,1.3024,1.2437,1.1964,1.29,1.3219,1.2697,1.3546,1.3122,0.96461,1.0  
018,0.90052,1.0071,0.88257,0.89149,0.92709,0.9676,0.93067,0.15583,0.15  
325,0.1577,0.14955,0.16042,0.15028,0.15049,0.15471,0.15488,0.15326,0.1  
5413,0.15794,0.15051,0.15364,0.16406,0.1491,0.15205,0.1498,2.3811,1.16  
91,1.3087,1.2475,1.4207,1.188,1.2998,1.285,1.1745,1.3017,1.0008,0.9861  
7,0.76418,0.95959,0.79657,0.84356,0.78123,0.8363,0.90063,0.15522,0.158  
05,0.15598,0.15675,0.14964,0.15924,0.15672,0.15332,0.15867,0.15806,0.1  
536,0.15514,0.14389,0.16205,0.15763,0.15468,0.15657,0.19082,1.098,1.36  
85,1.5541,1.2899,1.0845,1.2809,1.2655,1.2596,1.5031,1.3321,0.85165,0.9  
7326,0.74488,0.94453,0.77985,0.90646,0.95495,0.97974,0.89724,0.1554,0.  
15668,0.15478,0.15477,0.15514,0.15569,0.1504,0.15752,0.15257,0.16386,0  
.16123,0.15955,0.15469,0.15524,0.15512,0.14994,0.15119,0.19198,1.5011,  
1.1073,1.2881,1.2792,1.2696,1.2972,1.2808,1.2885,1.3246,1.409,0.87366,  
0.94635,0.90209,0.90072,0.93118,0.98238,0.83279,0.86911,0.15584,0.1485  
7,0.14714,0.1547,0.15951,0.15307,0.1574,0.15428,0.14752,0.15487,0.1565  
5,0.16001,0.15358,0.15635,0.15438,0.15225,0.1475,0.1413,0.19024,1.2644  
,1.3155,1.1941,1.0518,1.3605,1.2862,1.3602,1.5267,1.2756,1.2788,0.7873  
,0.95745,0.81265,0.92754,0.93739,0.91204,0.97772,0.89232,0.15804,0.152  
99,0.16484,0.15506,0.15383,0.16129,0.15383,0.15717,0.15598,0.14937,0.1  
5152,0.16234,0.15772,0.15383,0.16027,0.1555,0.15654,0.18939,0.19094,0.  
19109,1.1705,1.2867,1.2817,1.2066,1.2903,1.8676,1.4588,1.4863,1.3331,0  
.9046,0.79504,0.93607,0.96368,0.99113,1.0247,0.15614,0.15831,0.15801,0  
.15593,0.15703,0.15417,0.16095,0.15408,0.15995,0.15487,0.15658,0.15537  
,0.15199,0.15617,0.15638,0.1507,0.15195,0.1447,0.1874,0.19004,0.19302,  
0.18867,1.2115,1.4565,1.2339,1.2373,1.2795,1.2752,1.1044,1.5897,1.2716  
,0.84061,0.74873,0.89883,0.1507,0.14856,0.15891,0.15539,0.1528,0.1556,  
0.1534,0.15232,0.1531,0.1572,0.15026,0.15352,0.16405,0.15618,0.16096,0  
.16538,0.15404,0.16044,0.15294,0.1551,0.1915,0.19112,0.19139,0.18519,0  
.18838,0.19011,1.3565,1.1794,1.2826,1.3978,1.2849,1.2774,1.396,1.3028,  
0.15283,0.15368,0.15134,0.15189,0.15764,0.1538,0.15889,0.15827,0.15821  
,0.16636,0.1563,0.14953,0.1549,0.15424,0.15768,0.1566,0.15779,0.15277,  
0.15551,0.1555,0.15301,0.15338,0.15664,0.18887,0.18988,0.189,0.19257,0  
.19167,0.19411,1.3332,0.99914,1.3176,1.2293,1.3023,0.18719,0.19067,0.1  
4931,0.15008,0.155,0.15012,0.15868,0.15505,0.15242,0.16008,0.15625,0.1  
5791,0.15441,0.15615,0.15492,0.15567,0.15388,0.1518,0.15659,0.1545,0.1

5135,0.15646,0.15562,0.18849,0.19018,0.18918,0.18925,0.1886,0.19133,0.19229,0.18959,0.19009,0.19054,1.6801,1.4502,0.18928,0.19299,0.19274,0.18812,0.16284,0.15434,0.15841,0.15433,0.14731,0.1552,0.15366,0.15444,0.15482,0.16394,0.17192,0.1526,0.15757,0.1572,0.16302,0.14931,0.15648,0.15628,0.1521,0.18976,0.18781,0.19244,0.19252,0.19172,0.19271,0.19491,0.1905,0.19204,0.19312,0.19002,0.19058,0.19005,0.19029,0.1875,0.18974,0.19077,0.15646,0.15106,0.15543,0.1623,0.16402,0.14749,0.15159,0.15427,0.16044,0.14851,0.15648,0.15969,0.15884,0.14889,0.15778,0.15697,0.19114,0.18701,0.18776,0.19106,0.18806,0.19227,0.1915,0.18861,0.19118,0.18973,0.18992,0.19115,0.18879,0.1883,0.18737,0.19286,0.19083,0.19324,0.18822,0.15873,0.15461,0.15446,0.15571,0.15242,0.15098,0.16333,0.1541,0.16051,0.15829,0.15214,0.1558,0.15315,0.19005,0.19128,0.19026,0.19145,0.18951,0.19225,0.19006,0.19109,0.19393,0.19099,0.19014,0.19126,0.19347,0.19143,0.19165,0.19166,0.18748,0.19001,0.19046,0.19013,0.18834,0.15178,0.1607,0.15445,0.1564,0.14339,0.15994,0.14226,0.16312,0.15358,0.19344,0.19149,0.19335,0.19169,0.18983,0.18799,0.18681,0.19052,0.18846,0.18885,0.18841,0.19081,0.18974,0.19178,0.18746,0.19125,0.19068,0.18681,0.19503,0.19247,0.18958,0.19102,0.19232,0.19152,0.1908,0.156,0.15616,0.15531,0.15609,0.18724,0.19003,0.18969,0.1908,0.1903,0.19247,0.19306,0.18694,0.19108,0.18931,0.19379,0.19314,0.18864,0.19153,0.19578,0.18855,0.18901,0.18793,0.18866,0.18933,0.19049,0.19201,0.19098,0.18944,0.18914,0.19029,0.19298,0.18764,0.19104,0.19336,0.18697,0.19336,0.18933,0.18964,0.18875,0.19295,0.19041,0.19133,0.189,0.19377,0.18904,0.18948,0.19149,0.19022,0.19019,0.19074,0.19086,0.18897,0.19254,0.19154,0.18713,0.18956,0.19322,0.19204,0.19231,0.19229,0.19174,0.19055,0.18899,0.18807,0.18681,0.18968,0.19417,0.18693,0.19159,0.18939,0.19222,0.19061,0.19077,0.18882,0.19291,0.1908,0.18637,0.19416,0.19354,0.19009,0.19031,0.18915,0.18928,0.19081,0.18828,0.18948,0.18977,0.19205,0.19049,0.1905,0.19026,0.18998,0.19423,0.19204,0.1896,0.1861,0.19417,0.18877,0.18816,0.19114,0.19049,0.19076,0.19103,0.19148,0.19141,0.1925,0.1891,0.19061,0.19009,0.19125,0.19556,0.18797,0.1951,0.19406,0.19164,0.19036,0.1873,0.19165,0.18928,0.19132,0.19027,0.19201,0.1932,0.18886,0.19678,0.18819,0.19196,0.1879,0.19187,0.18979,0.19183,0.1897,0.19012,0.19207,0.18885,0.19245,0.18977,0.19111,0.18945,0.19058,0.19362,0.19451,0.19348,0.19157,0.19274,0.1894,0.19273,0.19118,0.18829,0.19013,0.1921,0.18621,0.19057,0.18855,0.1929,0.19196,0.19173,0.19343,0.19055,0.19392,0.18915,0.1918,0.19462,0.19524,0.19035,0.19215,0.18909,0.19162,0.19109,0.19006,0.19191,0.1886,0.19124,0.19003,0.18923,0.19319,0.19272,0.19229,0.18862,0.19008,0.18919,0.19108,0.18862,0.19044,0.19163,0.19009,0.19184,0.18999,0.1917,0.19008,0.1902,0.18738,0.18879,0.18986,0.19093,0.18724,0.18977,0.1922,0.18894

0.16876,0.16603,0.16909,0.16787,0.16874,0.16779,0.16856,0.16922,0.16757,0.1679,0.16922,0.16796,0.16813,0.16693,0.16776,0.16868,0.16592,0.16823,0.17006,0.16867,0.79504,0.95071,0.76839,0.85763,0.16759,0.16791,0.16918,0.16725,0.16898,0.16805,0.1674,0.16607,0.17173,0.1664,0.1689,0.17148,0.16848,0.16695,0.16745,1.6023,0.88439,0.90981,0.8682,1.0261,0.8777,0.98416,0.16699,0.16684,0.16625,0.16718,0.16541,0.16719,0.16611,0.16633,0.16822,0.17055,0.17057,0.16498,0.16981,0.17083,0.16907,1.597,1.562,0.88171,0.87925,0.87918,0.96332,0.96808,0.74273,0.76759,0.87429,0.16806,0.1684,0.17042,0.16733,0.16941,0.16772,0.16857,0.16795,0.16633,0.16927,0.16972,0.16795,0.16734,0.16846,0.16544,1.5715,1.563,1.6171,0.87842,0.96068,0.80552,0.77536,0.88011,0.94583,0.88556,0.649,1.1017,0.165

88,0.16954,0.16744,0.16749,0.16819,0.16784,0.16987,0.17125,0.16885,0.16656,0.167,0.16691,0.16943,0.1696,0.16628,0.17156,1.6243,1.5752,1.6055,1.6319,0.78535,0.8819,0.88695,0.93796,0.9504,0.93511,0.87538,0.83572,0.8784,0.87288,0.16965,0.16873,0.16921,0.16727,0.16995,0.17006,0.16919,0.1668,0.1663,0.16787,0.16471,0.16728,0.16878,0.16805,0.16974,0.16752,1.6209,1.5938,1.5724,1.6236,1.5628,1.6079,0.93066,0.59558,0.69558,0.79687,0.87724,0.9571,0.88262,0.77783,0.72823,0.96971,0.16803,0.16765,0.16663,0.16881,0.1691,0.17045,0.16796,0.16808,0.1698,0.16838,0.16983,0.16825,0.16975,0.16706,0.16824,0.1681,0.16824,1.5943,1.5722,1.5787,1.5933,1.6176,1.5991,0.90422,0.94148,0.88028,0.88064,0.83512,1.0167,0.89998,0.84812,1.1298,0.84459,0.87063,0.16767,0.16719,0.16666,0.1713,0.17046,0.1663,0.17042,0.17173,0.16785,0.17199,0.16833,0.17141,0.16919,0.19066,0.19344,0.19209,0.16815,1.5972,1.6054,1.5932,1.6036,1.6028,1.6237,1.5986,0.86601,0.87307,0.98037,0.7964,0.86394,0.90076,0.92225,0.98147,1.0645,0.89464,0.84055,0.16864,0.16905,0.16528,0.1694,0.16828,0.16847,0.16829,0.16643,0.16789,0.1686,0.1701,0.19153,0.19413,0.1921,0.1881,0.19306,0.19492,0.16825,1.5926,1.5919,1.6114,1.6074,1.5843,1.5819,1.602,0.78803,0.68115,0.94577,0.87843,0.90774,1.0705,0.69169,0.80691,0.91265,0.88069,0.86611,0.16859,0.1673,0.1666,0.16736,0.16725,0.1679,0.1664,0.16824,0.16953,0.19409,0.18786,0.19327,0.19053,0.1968,0.19083,0.19268,0.19105,0.19498,0.1689,1.568,1.5795,1.5704,1.5903,1.584,1.6148,1.6345,0.87577,0.88042,0.90385,0.93073,0.87841,0.88314,0.93133,0.86896,0.98263,0.8882,0.96148,0.89828,0.17021,0.16832,0.16827,0.16827,0.1672,0.16934,0.19778,0.19065,0.19228,0.19753,0.19237,0.1963,0.19457,0.18989,0.19322,0.18921,0.19493,0.1955,1.5712,1.612,1.5963,1.622,1.5887,1.574,1.6123,0.87176,0.79543,0.88189,0.98766,1.0278,0.8567,0.86074,0.89698,0.94497,0.90257,0.60979,0.83124,0.16576,0.16725,0.17192,0.1946,0.19534,0.19532,0.19044,0.1861,0.19216,0.19085,0.19384,0.19541,0.18863,0.19431,0.19229,0.19503,0.19373,0.19263,1.6087,1.6025,1.6134,1.6061,1.6054,1.6148,1.6098,1.595,1.6141,0.8707,0.92772,0.87694,0.89556,0.89194,0.72111,1.0043,0.93635,0.88084,0.79953,0.89021,0.19075,0.19325,0.19792,0.19514,0.19603,0.19478,0.19627,0.19519,0.19556,0.18795,0.1844,0.19551,0.19254,0.19359,0.19186,0.19336,0.1955,0.19356,1.6227,1.6105,1.5464,1.6074,1.5944,1.5887,1.6204,1.6132,1.6333,0.87769,0.88848,0.65532,0.68247,0.67952,0.56168,0.73263,0.59899,0.67296,0.66222,0.66052,0.19335,0.19818,0.18804,0.19381,0.19469,0.1968,0.1956,0.20299,0.19108,0.19404,0.19099,0.19082,0.19223,0.18888,0.19858,0.18766,0.20025,0.19184,1.6207,1.5776,1.5928,1.6025,1.5846,1.6114,1.6065,1.6064,1.5979,0.86951,0.67424,0.7353,0.81205,0.7728,0.64647,0.69783,0.53548,0.60199,0.6637,0.76504,0.19844,0.19245,0.19538,0.19227,0.19386,0.19611,0.19525,0.18586,0.19432,0.18675,0.19569,0.19599,0.19075,0.19659,0.1924,0.19457,0.19148,0.19847,1.6014,1.5939,1.5909,1.6056,1.6238,1.6208,1.5964,0.69235,1.0543,0.98297,0.67361,0.52522,0.67433,0.67214,0.75701,0.66821,0.68726,0.46784,0.51709,0.65262,0.19145,0.19512,0.19413,0.19604,0.19362,0.19406,0.19512,0.19193,0.1917,0.1934,0.19225,0.1921,0.19244,0.19284,0.19517,0.19067,0.19386,0.18901,1.6156,1.6246,1.5934,1.5962,1.5948,1.5942,0.79786,0.88423,0.96769,0.903,1.079,0.79164,0.65517,0.54665,0.65853,0.61022,0.56695,0.6748,0.63151,0.64991,0.19378,0.19015,0.19336,0.19421,0.19426,0.19333,0.192,0.19675,0.18921,0.19369,0.19472,0.19216,0.19328,0.1927,0.19085,0.19167,0.1921,0.19865,1.5823,1.6054,1.6066,1.5983,1.5778,0.93449,0.88699,0.98622,0.90939,0.99354,1.0201,0.48111,0.67996,0.66718,0.60054,0.69264,0.65409,0.78579,0.70581,0.66615,0.19681,0.195,0.19602,0.18996,0.19452,0.194



06,0.19272,0.19548,0.19162,0.19536,0.19337,0.1938,0.19279,0.1966,0.198  
39,0.20404,0.19637,0.18997,1.5655,1.5835,1.6421,0.92359,0.88205,0.8599  
1,0.91224,0.92555,0.89227,0.95124,0.92806,0.70462,0.73018,0.66183,0.73  
741,0.65159,0.6532,0.68252,0.70375,0.68358,0.19442,0.1928,0.19501,0.18  
915,0.19695,0.18995,0.18863,0.19292,0.19189,0.19334,0.19276,0.19418,0.  
18761,0.19155,0.19954,0.18723,0.1906,0.18967,1.5836,0.83174,0.92447,0.  
88587,0.98876,0.84204,0.91742,0.90289,0.83529,0.91821,0.73116,0.7095,0  
.57934,0.69415,0.59593,0.62934,0.58244,0.62626,0.6623,0.19325,0.19534,  
0.19377,0.19486,0.18947,0.1955,0.19523,0.19237,0.19697,0.19572,0.19071  
,0.19254,0.18501,0.19892,0.19511,0.19199,0.19309,0.21834,0.7934,0.9577  
9,1.0756,0.91049,0.77854,0.90117,0.88924,0.89022,1.0474,0.92883,0.6398  
8,0.71205,0.56499,0.69294,0.58673,0.66043,0.69409,0.70646,0.65943,0.19  
27,0.19416,0.19323,0.19239,0.19357,0.19346,0.18882,0.19564,0.1917,0.20  
002,0.19673,0.19539,0.19351,0.19356,0.19251,0.18987,0.18953,0.219,1.03  
99,0.79908,0.90939,0.90253,0.89897,0.9145,0.90278,0.91065,0.93235,0.98  
863,0.6495,0.68921,0.6635,0.66038,0.67781,0.71216,0.621,0.64158,0.1941  
6,0.1887,0.18708,0.1928,0.19705,0.1902,0.19502,0.19337,0.18778,0.19251  
,0.19482,0.198,0.18985,0.19395,0.19184,0.19211,0.18873,0.18376,0.21667  
,0.89474,0.9334,0.85162,0.76188,0.94619,0.90862,0.94697,1.0586,0.89489  
,0.90167,0.58992,0.70413,0.60746,0.67842,0.69101,0.66816,0.70687,0.657  
84,0.19583,0.19159,0.19998,0.19335,0.19208,0.19701,0.1915,0.19588,0.19  
365,0.18908,0.19099,0.19948,0.193,0.19338,0.19636,0.19359,0.1949,0.216  
98,0.21872,0.21762,0.83619,0.90365,0.90453,0.86706,0.91308,1.2735,1.01  
49,1.044,0.93633,0.66385,0.5956,0.68308,0.70532,0.71743,0.74153,0.1930  
7,0.19423,0.19654,0.19236,0.19336,0.19325,0.19818,0.19275,0.19696,0.19  
339,0.19284,0.19309,0.19088,0.19449,0.19418,0.19026,0.19168,0.18684,0.  
21461,0.21694,0.21966,0.21612,0.85594,1.0114,0.87692,0.8799,0.89701,0.  
90378,0.79367,1.0875,0.89836,0.62151,0.56816,0.65796,0.19187,0.18833,0  
.19541,0.19357,0.19018,0.19274,0.18989,0.19161,0.19201,0.19485,0.18838  
,0.19114,0.20007,0.19495,0.19733,0.20138,0.19146,0.19635,0.19027,0.193  
98,0.21842,0.21892,0.21924,0.21341,0.21539,0.21728,0.94802,0.83966,0.8  
982,0.96909,0.90812,0.9051,0.9799,0.92968,0.19028,0.19143,0.19062,0.19  
104,0.19545,0.19229,0.19453,0.19561,0.19602,0.19985,0.19432,0.18955,0.  
19271,0.19213,0.19543,0.19354,0.19528,0.19292,0.19402,0.19337,0.19156,  
0.19207,0.19451,0.21486,0.2176,0.21666,0.2204,0.21873,0.22281,0.94962,  
0.72594,0.92785,0.86494,0.91383,0.21426,0.21686,0.18826,0.19005,0.1922  
5,0.18913,0.19702,0.19371,0.19075,0.19622,0.19419,0.19446,0.19338,0.19  
382,0.19141,0.19251,0.19224,0.19177,0.19208,0.19302,0.19001,0.19535,0.  
19445,0.21668,0.21673,0.21781,0.21562,0.21679,0.21784,0.21982,0.21685,  
0.21535,0.21625,1.17,1.0132,0.2174,0.21858,0.21919,0.21542,0.19694,0.1  
9242,0.19599,0.19255,0.18816,0.19337,0.19096,0.19307,0.19101,0.20026,0  
.20456,0.19051,0.19506,0.19445,0.1977,0.19002,0.1939,0.19411,0.19133,0  
.21705,0.21629,0.21909,0.21916,0.21942,0.22067,0.22162,0.21634,0.21868  
,0.22015,0.21607,0.21711,0.21698,0.21793,0.21403,0.21644,0.21799,0.193  
64,0.18894,0.19262,0.19803,0.19937,0.18852,0.19208,0.19365,0.19583,0.1  
8964,0.19445,0.19526,0.19693,0.18932,0.19559,0.19476,0.2168,0.21381,0.  
2166,0.21714,0.21581,0.21969,0.22048,0.21558,0.21646,0.2176,0.21708,0.  
21703,0.21766,0.21713,0.2146,0.22071,0.21907,0.21982,0.21619,0.19721,0  
.19284,0.19228,0.1949,0.19065,0.19,0.20049,0.19403,0.1981,0.19551,0.18  
973,0.19416,0.19138,0.21715,0.2191,0.21725,0.2177,0.21763,0.21864,0.21  
803,0.21907,0.22128,0.2182,0.21825,0.21802,0.22131,0.21922,0.21944,0.2  
1952,0.21672,0.2179,0.21696,0.21902,0.21628,0.19049,0.19664,0.1931,0.1

9463,0.18438,0.19631,0.18565,0.19651,0.19278,0.22123,0.21868,0.21996,0.21765,0.21642,0.21621,0.21448,0.21677,0.21524,0.2174,0.21624,0.21694,0.21733,0.21727,0.21505,0.21921,0.21733,0.21473,0.22029,0.21928,0.21569,0.21857,0.21973,0.21904,0.21777,0.19389,0.19332,0.19394,0.19298,0.21574,0.21752,0.21625,0.21811,0.2165,0.21927,0.22103,0.21468,0.21773,0.21847,0.22039,0.21969,0.21518,0.21829,0.22199,0.21673,0.21555,0.21611,0.21539,0.21582,0.21989,0.21778,0.21937,0.21773,0.2159,0.21683,0.22015,0.21516,0.21782,0.21858,0.21478,0.21979,0.21521,0.21774,0.21648,0.21994,0.21905,0.21904,0.21628,0.22056,0.21478,0.21607,0.21896,0.2179,0.21813,0.21707,0.21826,0.21655,0.22019,0.21894,0.21376,0.21742,0.22031,0.21951,0.21826,0.21977,0.2204,0.2195,0.21517,0.21601,0.2144,0.21543,0.22159,0.2157,0.21891,0.21576,0.21901,0.21755,0.21785,0.21479,0.22178,0.21724,0.21309,0.21997,0.22027,0.21811,0.21773,0.21658,0.21604,0.21629,0.21661,0.21746,0.21688,0.21944,0.21817,0.21742,0.21977,0.21789,0.21954,0.21916,0.21787,0.21377,0.22133,0.21584,0.21377,0.2176,0.21794,0.21793,0.21718,0.21874,0.21946,0.21836,0.21702,0.21719,0.21849,0.21967,0.22185,0.21536,0.22093,0.21973,0.22014,0.21663,0.21447,0.21805,0.21653,0.21871,0.2173,0.21848,0.2191,0.21695,0.22337,0.21638,0.21903,0.21499,0.21828,0.21831,0.21952,0.21737,0.21792,0.21837,0.21679,0.22009,0.21768,0.21814,0.21754,0.21731,0.22092,0.22195,0.22096,0.21992,0.22006,0.216,0.22,0.21917,0.21487,0.21687,0.22018,0.21314,0.21842,0.21586,0.22093,0.21954,0.21911,0.22077,0.21704,0.22239,0.21526,0.2201,0.22033,0.22208,0.21802,0.21981,0.2164,0.21649,0.21694,0.21679,0.21874,0.21417,0.21804,0.21682,0.21701,0.22032,0.21924,0.21837,0.2154,0.21737,0.21569,0.21835,0.21733,0.21799,0.21976,0.21761,0.21918,0.2179,0.21956,0.21784,0.21749,0.21606,0.21703,0.21627,0.21752,0.21545,0.21694,0.21963,0.21629,0.18034,0.17898,0.18257,0.18031,0.18195,0.17947,0.18232,0.18146,0.18016,0.18024,0.18193,0.18104,0.18022,0.17951,0.18011,0.18148,0.17945,0.18047,0.18113,0.18151,0.594,0.70222,0.57639,0.62593,0.1786,0.17949,0.18193,0.17883,0.18059,0.17925,0.17937,0.17806,0.18319,0.17865,0.18065,0.18393,0.18002,0.17959,0.18007,1.1338,0.65054,0.66896,0.6407,0.74058,0.65087,0.71734,0.17854,0.17887,0.17885,0.17965,0.17851,0.17921,0.17914,0.17892,0.18044,0.18278,0.18427,0.17753,0.18231,0.1829,0.18139,1.1168,1.0953,0.64391,0.6385,0.64794,0.71042,0.69793,0.55273,0.56985,0.64385,0.18062,0.18082,0.18258,0.17913,0.18248,0.18079,0.18149,0.18009,0.17944,0.18031,0.18198,0.17934,0.17966,0.18027,0.17894,1.0937,1.0717,1.1423,0.64454,0.69024,0.60445,0.57794,0.64717,0.68645,0.64981,0.50113,0.80269,0.17874,0.1815,0.17891,0.18028,0.18065,0.18054,0.18233,0.18407,0.18085,0.17921,0.18006,0.17817,0.1829,0.18199,0.17975,0.18426,1.1463,1.0974,1.137,1.1464,0.58251,0.65151,0.6548,0.67951,0.69448,0.67374,0.63936,0.61775,0.64496,0.63817,0.18211,0.18166,0.18221,0.18051,0.18244,0.18241,0.18204,0.17797,0.17959,0.1806,0.17675,0.18005,0.18142,0.18062,0.18249,0.17988,1.1496,1.1134,1.0988,1.1381,1.0849,1.1391,0.67804,0.46146,0.52095,0.59263,0.63298,0.70676,0.64918,0.57815,0.54322,0.7004,0.17968,0.17874,0.17956,0.18144,0.18229,0.18135,0.18077,0.18011,0.1819,0.18143,0.18247,0.18046,0.18265,0.17874,0.18082,0.18016,0.18003,1.1171,1.0915,1.1016,1.1224,1.1329,1.1126,0.66794,0.69177,0.64238,0.64654,0.62044,0.7338,0.66681,0.62429,0.81425,0.63043,0.63985,0.1799,0.17865,0.17834,0.18519,0.18229,0.17926,0.18204,0.18347,0.18054,0.18428,0.18158,0.18248,0.18096,0.18371,0.18728,0.18708,0.18083,1.1132,1.1318,1.1123,1.1223,1.1316,1.1388,1.113,0.63427,0.64509,0.71464,0.59717,0.63386,0.65956,0.6761,0.70898,0.77132,0.66428,0.61804,0.18161,0.18186,0.17757,0.18181,0.

18009,0.18025,0.18069,0.17827,0.18051,0.1811,0.18153,0.18541,0.18665,0.  
.1867,0.18562,0.18695,0.18868,0.17966,1.1076,1.107,1.1279,1.1301,1.108  
4,1.106,1.1153,0.58811,0.52173,0.69499,0.64897,0.66738,0.78504,0.52291  
,0.60135,0.66827,0.65276,0.63792,0.18136,0.17988,0.17979,0.17989,0.179  
26,0.18113,0.1787,0.18099,0.18103,0.18601,0.18495,0.18558,0.18345,0.18  
868,0.18404,0.18682,0.18459,0.18646,0.18092,1.0762,1.1091,1.1026,1.118  
,1.0979,1.1408,1.1571,0.64656,0.64259,0.65792,0.67725,0.64771,0.65622,  
0.67259,0.63496,0.71326,0.65528,0.7085,0.66873,0.18217,0.18093,0.18054  
,0.18163,0.17902,0.18209,0.18662,0.18373,0.18615,0.19022,0.18659,0.186  
32,0.1878,0.18432,0.18597,0.18568,0.18954,0.18799,1.0944,1.1197,1.1199  
,1.1484,1.1237,1.0947,1.1389,0.63723,0.59573,0.6503,0.71555,0.74948,0.  
63886,0.63496,0.65418,0.69879,0.66492,0.47124,0.62089,0.17851,0.17901,  
0.18436,0.18893,0.18866,0.18707,0.18608,0.18427,0.18439,0.18712,0.1876  
5,0.1876,0.18703,0.18815,0.18547,0.18952,0.18697,0.18615,1.1225,1.1173  
,1.1371,1.1296,1.1286,1.1562,1.138,1.1067,1.1379,0.64029,0.68763,0.645  
08,0.65708,0.66482,0.54054,0.73205,0.69299,0.64765,0.5969,0.6556,0.186  
11,0.18554,0.18972,0.18823,0.18993,0.18768,0.19015,0.18718,0.18616,0.1  
8656,0.18175,0.18818,0.18538,0.18882,0.18513,0.18694,0.18887,0.18438,1  
.135,1.127,1.064,1.1264,1.1165,1.1184,1.1487,1.1382,1.1376,0.64508,0.6  
5576,0.49602,0.51281,0.51456,0.431,0.54035,0.45982,0.50556,0.49852,0.4  
9727,0.18806,0.18637,0.1856,0.18769,0.18752,0.18693,0.18707,0.18974,0.  
18664,0.18798,0.18878,0.1841,0.1851,0.18678,0.18969,0.18219,0.18558,0.  
18654,1.1341,1.1073,1.1357,1.1393,1.108,1.1322,1.1261,1.1219,1.114,0.6  
2078,0.51174,0.54547,0.60144,0.56846,0.48633,0.5147,0.41652,0.45314,0.  
49949,0.57617,0.18898,0.18569,0.18938,0.18552,0.18694,0.18918,0.18826,  
0.18393,0.1879,0.18228,0.18612,0.18916,0.18699,0.18801,0.1884,0.1847,0  
.18681,0.1885,1.1302,1.1206,1.1065,1.1189,1.1407,1.1439,1.1264,0.50469  
,0.75549,0.71073,0.50516,0.41351,0.50862,0.50081,0.56016,0.50878,0.513  
06,0.36665,0.40058,0.491,0.18633,0.1879,0.18821,0.18863,0.18654,0.1888  
4,0.1868,0.18518,0.18568,0.18622,0.18539,0.18569,0.18678,0.18492,0.187  
93,0.18482,0.18616,0.18201,1.1313,1.145,1.1244,1.1282,1.1142,1.112,0.5  
8053,0.63113,0.69342,0.64877,0.78016,0.58324,0.48951,0.42101,0.49524,0  
.46871,0.43345,0.50634,0.47399,0.4912,0.18675,0.18377,0.18758,0.18795,  
0.18805,0.18624,0.18496,0.18928,0.18413,0.18765,0.1868,0.18731,0.18778  
,0.1866,0.18407,0.18834,0.18722,0.18839,1.106,1.1316,1.1326,1.1184,1.0  
799,0.67409,0.63818,0.71269,0.656,0.71113,0.73035,0.37821,0.51299,0.49  
508,0.45914,0.52076,0.48782,0.57521,0.52794,0.49753,0.1887,0.18723,0.1  
8637,0.18496,0.18583,0.18611,0.18704,0.18912,0.18617,0.18916,0.18693,0  
.18813,0.18562,0.1859,0.18855,0.18846,0.18775,0.18315,1.085,1.1034,1.1  
465,0.67335,0.63652,0.61825,0.6595,0.66182,0.64009,0.69274,0.67392,0.5  
2766,0.53875,0.4985,0.55093,0.49423,0.48727,0.51028,0.52707,0.51839,0.  
1882,0.18796,0.18784,0.18508,0.1884,0.1849,0.18538,0.18739,0.18467,0.1  
88,0.18616,0.18455,0.18185,0.18579,0.18904,0.18,0.18585,0.18629,1.1022  
,0.60229,0.66854,0.64368,0.7129,0.61136,0.65792,0.65431,0.60776,0.6581  
,0.54531,0.52201,0.44243,0.51927,0.45471,0.47866,0.43715,0.47753,0.493  
3,0.18977,0.18677,0.18828,0.18856,0.18629,0.1853,0.18797,0.18639,0.189  
08,0.18728,0.18358,0.18604,0.18384,0.19128,0.18828,0.18651,0.1855,0.19  
209,0.57564,0.69209,0.77093,0.66203,0.56526,0.64544,0.63254,0.64188,0.  
75245,0.66655,0.48114,0.53797,0.43588,0.51897,0.452,0.49473,0.52177,0.  
52535,0.49461,0.18531,0.18686,0.18604,0.18617,0.18697,0.1867,0.18486,0  
.18751,0.18627,0.18922,0.18688,0.18712,0.18891,0.18835,0.18424,0.18743  
,0.18341,0.19398,0.74162,0.58549,0.65257,0.65291,0.64926,0.66316,0.656

77,0.65894,0.68287,0.71296,0.49306,0.51493,0.499,0.50146,0.50678,0.531  
86,0.47198,0.48706,0.18667,0.1869,0.18387,0.18682,0.18806,0.18448,0.18  
838,0.18785,0.18528,0.18577,0.1873,0.18979,0.18352,0.18676,0.18456,0.1  
8762,0.18544,0.1853,0.19225,0.64553,0.67959,0.62038,0.55883,0.67845,0.  
64866,0.67978,0.75534,0.64496,0.65759,0.45146,0.52757,0.46072,0.5116,0  
.51788,0.50141,0.52912,0.49219,0.18763,0.18462,0.18882,0.18667,0.18491  
,0.18786,0.18565,0.18951,0.18634,0.18452,0.18686,0.18999,0.18462,0.186  
45,0.1864,0.18662,0.18691,0.19225,0.19288,0.19189,0.60724,0.65751,0.65  
079,0.63544,0.65617,0.89756,0.73004,0.74312,0.67065,0.50236,0.45834,0.  
51188,0.52439,0.52919,0.54276,0.18607,0.1837,0.18655,0.18577,0.18497,0  
.18748,0.18862,0.18553,0.18762,0.18753,0.18619,0.1866,0.18466,0.18804,  
0.18793,0.18545,0.18664,0.18739,0.18987,0.19057,0.19385,0.19077,0.6183  
9,0.73086,0.64064,0.63914,0.65327,0.65617,0.58816,0.77045,0.65358,0.46  
688,0.43477,0.49407,0.1871,0.18428,0.18677,0.18636,0.18349,0.18625,0.1  
8532,0.18556,0.18511,0.1863,0.18346,0.18478,0.18912,0.1892,0.18629,0.1  
9047,0.18493,0.18651,0.18376,0.18799,0.19327,0.19295,0.19313,0.18791,0  
.19007,0.19177,0.67352,0.60509,0.64588,0.69846,0.6518,0.6531,0.70733,0  
.67804,0.18434,0.18418,0.1846,0.18366,0.18763,0.1859,0.18616,0.1896,0.  
18959,0.18817,0.18873,0.18566,0.18594,0.1858,0.18803,0.18752,0.18747,0  
.18778,0.18822,0.18629,0.18628,0.18584,0.18694,0.19001,0.19144,0.1934,  
0.1929,0.19421,0.19789,0.68775,0.53284,0.67389,0.62014,0.65805,0.19001  
,0.19203,0.18442,0.18571,0.1851,0.18424,0.18881,0.18624,0.18656,0.1856  
5,0.18689,0.18593,0.18779,0.18479,0.18426,0.18507,0.1875,0.18668,0.184  
53,0.18542,0.18464,0.1883,0.18785,0.19073,0.19141,0.19068,0.19088,0.19  
235,0.19284,0.19456,0.19229,0.19033,0.19237,0.83889,0.72666,0.19031,0.  
19411,0.19564,0.19115,0.18508,0.18652,0.18892,0.18702,0.1853,0.18547,0  
.18385,0.18637,0.1841,0.19028,0.18926,0.18439,0.18886,0.18567,0.18725,  
0.18879,0.18791,0.18725,0.18715,0.19134,0.19178,0.19328,0.19276,0.1953  
3,0.19502,0.19507,0.19047,0.1931,0.19426,0.19114,0.19166,0.19213,0.191  
92,0.18685,0.1909,0.19267,0.18811,0.1832,0.18526,0.18877,0.18811,0.187  
32,0.18759,0.18666,0.18761,0.18529,0.18818,0.18635,0.18918,0.18634,0.1  
8946,0.18667,0.19043,0.18801,0.19149,0.19281,0.19046,0.19456,0.19459,0  
.18974,0.19107,0.19174,0.19081,0.19438,0.19083,0.19249,0.18972,0.19463  
,0.19326,0.19417,0.19124,0.18961,0.1858,0.18637,0.18788,0.18436,0.1854  
1,0.18975,0.18817,0.1897,0.1874,0.18416,0.18664,0.18471,0.1912,0.19215  
,0.19253,0.19242,0.1918,0.19366,0.19359,0.19456,0.1956,0.1934,0.19344,  
0.19213,0.19515,0.19391,0.19416,0.19429,0.19248,0.19218,0.19202,0.1937  
5,0.19055,0.18523,0.18804,0.18549,0.18895,0.18272,0.18659,0.18669,0.18  
548,0.18679,0.19654,0.19505,0.1937,0.19232,0.19188,0.19092,0.18823,0.1  
917,0.19037,0.19205,0.19076,0.19221,0.191,0.19052,0.18959,0.19448,0.19  
203,0.18906,0.19503,0.1938,0.19114,0.19295,0.19279,0.19353,0.19343,0.1  
8789,0.18723,0.18768,0.1864,0.19057,0.19226,0.19083,0.19382,0.19006,0.  
19312,0.19531,0.1902,0.19187,0.19335,0.19508,0.19437,0.18992,0.19176,0  
.19629,0.19171,0.19049,0.1897,0.19148,0.19093,0.19469,0.1937,0.19275,0  
.19011,0.19105,0.19112,0.19541,0.19119,0.19359,0.19449,0.18974,0.19495  
,0.18884,0.19164,0.19056,0.19398,0.1939,0.19399,0.19168,0.19541,0.1895  
2,0.19031,0.1931,0.19219,0.19271,0.19303,0.19462,0.19179,0.1955,0.1920  
1,0.18925,0.19344,0.1956,0.19397,0.19293,0.19442,0.19362,0.19505,0.189  
61,0.1918,0.18809,0.1888,0.19682,0.19104,0.19412,0.19094,0.1939,0.1928  
6,0.19212,0.18922,0.19496,0.19202,0.18997,0.19385,0.19504,0.19176,0.19  
276,0.19216,0.18944,0.19127,0.18982,0.19174,0.19258,0.19368,0.19194,0.  
19067,0.19296,0.19249,0.19327,0.19282,0.19311,0.18829,0.19417,0.19212,

0.18876,0.19076,0.19245,0.1937,0.1908,0.19319,0.19285,0.19418,0.1923,0  
.19221,0.19371,0.19353,0.19675,0.19065,0.19549,0.1941,0.19569,0.19087,  
0.18954,0.19248,0.19173,0.19319,0.19272,0.19265,0.19321,0.19154,0.1961  
,0.1917,0.1933,0.19087,0.19213,0.19328,0.19348,0.19187,0.19334,0.1919,  
0.19078,0.19378,0.19121,0.19051,0.19311,0.19145,0.19448,0.19611,0.1947  
9,0.19448,0.19394,0.1901,0.19461,0.19281,0.19039,0.19094,0.1955,0.1878  
6,0.19347,0.19109,0.1946,0.1931,0.19253,0.19678,0.193,0.19668,0.18926,  
0.19476,0.19483,0.19598,0.19286,0.19326,0.19146,0.19165,0.1919,0.19263  
,0.19431,0.18959,0.19313,0.19173,0.19365,0.19425,0.19275,0.19339,0.191  
4,0.19063,0.19011,0.1922,0.19184,0.19043,0.19324,0.19248,0.19449,0.191  
81,0.19564,0.1921,0.1921,0.19046,0.1929,0.19147,0.19288,0.19099,0.1932  
3,0.19501,0.19197  
0.17582,0.17344,0.17706,0.17559,0.17727,0.17385,0.17609,0.17693,0.1741  
6,0.17481,0.17679,0.17457,0.17508,0.1752,0.17474,0.17574,0.17432,0.175  
68,0.17575,0.17691,0.46674,0.53434,0.45274,0.48979,0.17349,0.17342,0.1  
7658,0.17372,0.17461,0.17454,0.17409,0.17226,0.17753,0.17302,0.17587,0  
.17779,0.17403,0.17541,0.17509,0.84083,0.51056,0.51457,0.49403,0.55646  
,0.50529,0.54629,0.17376,0.17249,0.1739,0.174,0.17258,0.17384,0.17488,  
0.173,0.17605,0.17674,0.17885,0.1723,0.17556,0.17732,0.17611,0.81187,0  
.80941,0.49962,0.48928,0.49715,0.54944,0.53782,0.43499,0.43818,0.49503  
,0.17499,0.17586,0.17728,0.17426,0.17635,0.17497,0.17734,0.1751,0.1742  
5,0.17501,0.17583,0.17381,0.17406,0.17505,0.17457,0.81233,0.7923,0.851  
19,0.49831,0.52719,0.46892,0.453,0.50075,0.52367,0.49461,0.40208,0.598  
63,0.1735,0.17618,0.17376,0.17441,0.17471,0.17564,0.17681,0.17855,0.17  
576,0.17343,0.1743,0.17324,0.17752,0.17562,0.17436,0.17812,0.85527,0.8  
0711,0.84008,0.8493,0.4577,0.50968,0.50213,0.52138,0.53091,0.51722,0.4  
9295,0.47478,0.49576,0.49038,0.17675,0.17627,0.1772,0.17539,0.17576,0.  
17701,0.17553,0.17205,0.17332,0.17494,0.17066,0.17472,0.1765,0.17585,0  
.17664,0.17458,0.85816,0.81353,0.8108,0.84475,0.79818,0.85621,0.51667,  
0.36728,0.41186,0.45322,0.4829,0.54261,0.504,0.45304,0.41971,0.5275,0.  
17617,0.17399,0.17382,0.17643,0.17791,0.17628,0.17563,0.17535,0.1765,0  
.17674,0.17702,0.17518,0.17662,0.17395,0.17548,0.17484,0.1748,0.81976,  
0.80305,0.80748,0.82796,0.84752,0.81567,0.51657,0.53707,0.50287,0.4988  
8,0.481,0.55557,0.51007,0.48552,0.61934,0.48164,0.49107,0.17425,0.1727  
5,0.17316,0.17827,0.17695,0.1734,0.17587,0.17639,0.17495,0.17861,0.175  
6,0.1772,0.17587,0.16406,0.16667,0.1669,0.17577,0.8258,0.83754,0.82457  
,0.83325,0.84058,0.84362,0.82735,0.48833,0.49715,0.54423,0.46216,0.487  
09,0.50448,0.5136,0.54263,0.59248,0.50923,0.47218,0.1768,0.17738,0.172  
12,0.17632,0.17628,0.17494,0.1755,0.17248,0.1751,0.17507,0.17645,0.166  
63,0.1662,0.16561,0.16799,0.16487,0.16736,0.1743,0.82533,0.8172,0.8297  
6,0.83335,0.81893,0.81769,0.83117,0.45701,0.41629,0.53516,0.50041,0.51  
35,0.59625,0.40609,0.46414,0.50896,0.50522,0.48899,0.1759,0.17488,0.17  
508,0.17407,0.17411,0.17483,0.17332,0.17511,0.17563,0.16514,0.16708,0.  
16463,0.16365,0.16711,0.16396,0.16821,0.16531,0.16313,0.17504,0.78972,  
0.81394,0.81393,0.81561,0.81166,0.862,0.87441,0.50642,0.49639,0.50229,  
0.51772,0.49921,0.50458,0.51763,0.4913,0.53822,0.50449,0.54207,0.51252  
,0.17632,0.17493,0.17678,0.17691,0.17439,0.17666,0.1611,0.16283,0.1659  
4,0.16943,0.16623,0.16425,0.16755,0.16406,0.16523,0.1692,0.17006,0.167  
32,0.81119,0.81375,0.83779,0.84143,0.84095,0.81103,0.84342,0.48498,0.4  
6732,0.4994,0.54658,0.57235,0.50075,0.48552,0.50025,0.53782,0.51631,0.  
37546,0.48767,0.17286,0.17292,0.17876,0.16873,0.16872,0.1659,0.16766,0  
.16746,0.16338,0.16739,0.16673,0.16566,0.1692,0.16767,0.16491,0.16982,

0.16589,0.16586,0.83118,0.81931,0.83871,0.83693,0.84462,0.85018,0.8415  
7,0.81578,0.82436,0.49182,0.53088,0.49611,0.51115,0.51073,0.42259,0.56  
137,0.53635,0.49819,0.4677,0.50208,0.16795,0.16452,0.16797,0.16787,0.1  
6919,0.16641,0.16947,0.16589,0.16478,0.1682,0.16486,0.16734,0.16487,0.  
16887,0.16391,0.16715,0.16766,0.16367,0.84346,0.83159,0.79282,0.84243,  
0.82869,0.83161,0.84416,0.84631,0.84574,0.49125,0.50154,0.38442,0.4009  
7,0.40075,0.33901,0.4189,0.36035,0.39401,0.38851,0.38437,0.1677,0.1634  
1,0.16711,0.16539,0.16565,0.16344,0.16574,0.16223,0.16656,0.16799,0.17  
188,0.16467,0.16352,0.17028,0.1689,0.16344,0.15935,0.16705,0.83522,0.8  
0728,0.84774,0.84138,0.815,0.85038,0.83719,0.82269,0.81376,0.45484,0.3  
977,0.41701,0.46583,0.43605,0.37825,0.39469,0.33309,0.35343,0.38852,0.  
4477,0.16771,0.16569,0.16837,0.16556,0.16626,0.16857,0.16731,0.16754,0  
.16781,0.16425,0.16427,0.16746,0.16918,0.16588,0.17027,0.16311,0.16832  
,0.16544,0.85258,0.83445,0.805,0.82389,0.85015,0.84976,0.83972,0.38081  
,0.55834,0.53652,0.39201,0.33318,0.39874,0.38735,0.42133,0.39667,0.401  
41,0.29333,0.31812,0.38117,0.16779,0.16817,0.16898,0.16715,0.16657,0.1  
6963,0.16639,0.16461,0.16558,0.16438,0.16572,0.16516,0.16537,0.16411,0  
.16624,0.16594,0.16546,0.16136,0.82982,0.85707,0.82686,0.83468,0.82662  
,0.82937,0.43632,0.46981,0.51884,0.48642,0.58971,0.44641,0.3749,0.3303  
9,0.3809,0.36724,0.34007,0.39595,0.37002,0.38952,0.16691,0.16375,0.168  
12,0.1672,0.16809,0.16624,0.16426,0.16826,0.16488,0.16702,0.16494,0.16  
939,0.16759,0.16574,0.16293,0.17037,0.16609,0.16407,0.81901,0.84114,0.  
84915,0.82914,0.78719,0.50592,0.47662,0.52895,0.49345,0.5368,0.54657,0  
.30267,0.40361,0.38618,0.36274,0.4098,0.37605,0.44416,0.40135,0.38399,  
0.16917,0.16601,0.16298,0.16522,0.16485,0.1656,0.16671,0.16891,0.16624  
,0.16996,0.16605,0.16866,0.16541,0.16135,0.16613,0.16309,0.16617,0.161  
99,0.78779,0.82936,0.85976,0.51008,0.46796,0.46744,0.50879,0.48996,0.4  
7385,0.51873,0.50982,0.40611,0.41304,0.38956,0.43064,0.38955,0.3816,0.  
39558,0.40996,0.40056,0.16776,0.16753,0.16678,0.16646,0.16483,0.16592,  
0.16723,0.16888,0.16397,0.169,0.16673,0.16211,0.16353,0.16589,0.16409,  
0.15968,0.16818,0.16816,0.81675,0.45219,0.50892,0.48042,0.53457,0.4576  
4,0.4918,0.48838,0.4543,0.49795,0.42063,0.4021,0.34793,0.40127,0.35345  
,0.3722,0.34268,0.37255,0.3889,0.16976,0.16437,0.16878,0.16742,0.16848  
,0.16225,0.16731,0.16636,0.16826,0.16563,0.16308,0.16537,0.16769,0.170  
11,0.167,0.16632,0.16407,0.1576,0.43593,0.51934,0.58746,0.50009,0.4328  
,0.47582,0.46459,0.4779,0.56126,0.50487,0.38042,0.41814,0.34632,0.3979  
6,0.35405,0.38649,0.40487,0.40209,0.38658,0.16342,0.16534,0.16643,0.16  
557,0.16524,0.16623,0.16726,0.167,0.1664,0.16502,0.16456,0.16633,0.169  
45,0.16831,0.16346,0.16858,0.16317,0.15823,0.55704,0.4418,0.49523,0.49  
357,0.49178,0.49698,0.50066,0.4884,0.51639,0.53445,0.38757,0.39472,0.3  
8947,0.38864,0.39449,0.41551,0.36948,0.37785,0.16639,0.17075,0.16612,0  
.1664,0.16715,0.16494,0.1689,0.16777,0.16873,0.16594,0.16677,0.16717,0  
.16079,0.16656,0.16453,0.16856,0.16735,0.17011,0.15801,0.48723,0.51148  
,0.46929,0.42203,0.50831,0.48732,0.50259,0.56164,0.47945,0.4885,0.3579  
2,0.41286,0.36341,0.39949,0.40213,0.38345,0.41572,0.38462,0.16777,0.16  
552,0.16427,0.16688,0.16372,0.16359,0.16512,0.16878,0.16586,0.166,0.16  
755,0.16861,0.16201,0.16597,0.16495,0.16678,0.16659,0.15621,0.15783,0.  
15685,0.4591,0.49503,0.48404,0.4764,0.48346,0.67312,0.55266,0.56262,0.  
50476,0.39573,0.3624,0.39696,0.40236,0.40972,0.42368,0.16534,0.16285,0  
.1627,0.1647,0.16197,0.16636,0.16512,0.16587,0.1654,0.16685,0.16498,0.  
16511,0.164,0.1665,0.16671,0.16466,0.16931,0.17071,0.15371,0.15486,0.1  
5767,0.15449,0.46719,0.55143,0.48299,0.4797,0.49097,0.49653,0.44556,0.

5733,0.49111,0.3609,0.34421,0.38717,0.16803,0.16576,0.164,0.16541,0.16  
234,0.16569,0.1655,0.16638,0.16507,0.16527,0.16352,0.16464,0.16568,0.1  
6936,0.16214,0.16654,0.1643,0.16454,0.16308,0.16766,0.15838,0.15779,0.  
15857,0.15282,0.15486,0.15735,0.50276,0.4517,0.48835,0.53562,0.49063,0  
.49257,0.52945,0.51142,0.16568,0.16451,0.16571,0.16514,0.16716,0.16483  
,0.16225,0.1679,0.16914,0.1647,0.16892,0.16782,0.16568,0.16633,0.16688  
,0.16709,0.16457,0.16811,0.16923,0.16564,0.16539,0.16549,0.16639,0.154  
67,0.15759,0.1585,0.15669,0.15764,0.16344,0.52417,0.40678,0.50658,0.46  
793,0.50221,0.15517,0.15652,0.16605,0.16663,0.16455,0.16598,0.16705,0.  
16459,0.16915,0.16304,0.16504,0.16402,0.16656,0.16402,0.16496,0.16588,  
0.1676,0.16624,0.16367,0.16423,0.16514,0.16848,0.16778,0.15715,0.15703  
,0.15541,0.15574,0.15675,0.1581,0.16011,0.15661,0.15586,0.15798,0.6280  
4,0.53898,0.15498,0.15885,0.15837,0.15731,0.16256,0.16594,0.16807,0.16  
604,0.16689,0.16602,0.16404,0.16577,0.16277,0.16756,0.16133,0.16453,0.  
16827,0.16328,0.16354,0.17132,0.16683,0.16686,0.1686,0.15689,0.1579,0.  
15923,0.15816,0.16036,0.15853,0.15856,0.15599,0.15847,0.15743,0.15473,  
0.15529,0.15678,0.15749,0.15254,0.155,0.1577,0.16693,0.16518,0.16464,0  
.16699,0.16337,0.16912,0.17036,0.16682,0.16672,0.16866,0.1677,0.16444,  
0.16744,0.17104,0.16822,0.16624,0.1561,0.15504,0.15649,0.1575,0.1541,0  
.1595,0.15913,0.15379,0.15553,0.15763,0.15524,0.15886,0.15483,0.15658,  
0.15447,0.15967,0.15784,0.15871,0.15581,0.16903,0.16619,0.16802,0.1679  
5,0.16575,0.16787,0.16449,0.1678,0.1677,0.16576,0.16407,0.16667,0.1649  
9,0.15616,0.15632,0.1574,0.15868,0.1556,0.15796,0.15826,0.16012,0.1601  
8,0.15843,0.15708,0.15694,0.1586,0.15744,0.15649,0.15871,0.15789,0.156  
14,0.15566,0.15814,0.15447,0.16581,0.16527,0.1646,0.16778,0.16814,0.16  
274,0.17275,0.16102,0.16644,0.16203,0.15925,0.15828,0.15703,0.15669,0.  
15616,0.15275,0.15668,0.15522,0.15655,0.15474,0.15953,0.15688,0.15487,  
0.15516,0.16013,0.15732,0.15434,0.15854,0.15788,0.15581,0.15774,0.1562  
9,0.15906,0.15749,0.16679,0.16755,0.16803,0.16638,0.1543,0.15789,0.155  
3,0.15877,0.15607,0.1577,0.16018,0.15607,0.15714,0.15757,0.15908,0.158  
94,0.15408,0.15634,0.16113,0.15635,0.15522,0.15639,0.15568,0.15637,0.1  
5783,0.15801,0.15777,0.15576,0.1562,0.15543,0.15998,0.15591,0.15727,0.  
15855,0.15389,0.15889,0.15329,0.15676,0.15466,0.158,0.15794,0.15938,0.  
15617,0.15953,0.15495,0.15496,0.1575,0.1578,0.15829,0.15799,0.15884,0.  
15522,0.15995,0.15736,0.15469,0.1582,0.15963,0.15874,0.1588,0.15939,0.  
15753,0.15973,0.15569,0.15697,0.1529,0.15516,0.16069,0.15534,0.1599,0.  
15539,0.15847,0.15889,0.15653,0.1561,0.15821,0.15683,0.15429,0.15821,0  
.15949,0.1569,0.15849,0.15664,0.15469,0.15523,0.15498,0.15731,0.15787,  
0.15656,0.15584,0.15383,0.15803,0.15742,0.15849,0.15823,0.1572,0.15327  
,0.15779,0.15702,0.15478,0.15475,0.15786,0.15802,0.15512,0.15812,0.158  
4,0.15909,0.15773,0.15554,0.15885,0.15957,0.16064,0.15496,0.15996,0.15  
848,0.1602,0.15669,0.15445,0.15702,0.1579,0.15781,0.15731,0.15682,0.15  
684,0.15621,0.16185,0.15767,0.15755,0.15557,0.15614,0.15705,0.15711,0.  
15724,0.15777,0.15674,0.15377,0.15944,0.15578,0.1548,0.15796,0.15671,0  
.15987,0.16091,0.15973,0.15939,0.15771,0.15438,0.1591,0.15783,0.15662,  
0.15723,0.15975,0.15249,0.15856,0.15697,0.15917,0.15699,0.15761,0.1615  
2,0.15773,0.16022,0.1555,0.15947,0.15959,0.16044,0.15884,0.15716,0.155  
66,0.15606,0.15532,0.15758,0.15886,0.15504,0.15699,0.15808,0.15761,0.1  
5946,0.15793,0.15783,0.15635,0.15526,0.15602,0.15625,0.15693,0.15549,0  
.15678,0.15661,0.15905,0.1575,0.1607,0.15704,0.15741,0.15748,0.15697,0  
.1558,0.15879,0.155,0.15809,0.15934,0.15718

0.16297,0.16114,0.1632,0.16173,0.16343,0.16187,0.16416,0.164,0.16049,0  
.16206,0.16395,0.16145,0.1618,0.1623,0.16129,0.16312,0.16082,0.16253,0  
.16187,0.1627,0.38534,0.43234,0.36622,0.39946,0.15988,0.16185,0.16229,  
0.16198,0.16298,0.16272,0.16092,0.16112,0.16386,0.16185,0.1628,0.16499  
,0.16252,0.1624,0.16203,0.66962,0.41423,0.41872,0.40182,0.4428,0.41269  
,0.438,0.16139,0.16201,0.16071,0.16117,0.16023,0.16177,0.16212,0.16001  
,0.16213,0.16438,0.16589,0.16037,0.16238,0.1638,0.16383,0.63903,0.6211  
1,0.40678,0.39417,0.40385,0.4483,0.43483,0.35818,0.35221,0.40356,0.162  
67,0.16288,0.16393,0.16098,0.16285,0.16287,0.1655,0.16176,0.16159,0.16  
233,0.1624,0.16135,0.16137,0.16237,0.16197,0.6285,0.62575,0.66991,0.40  
251,0.42054,0.37501,0.36961,0.40468,0.41457,0.40105,0.3342,0.47969,0.1  
6042,0.16334,0.16144,0.16188,0.16257,0.16361,0.16369,0.165,0.16374,0.1  
6075,0.16165,0.16145,0.1643,0.16237,0.16084,0.16597,0.67604,0.6297,0.6  
6036,0.68527,0.37413,0.414,0.40944,0.42232,0.42934,0.41718,0.39972,0.3  
8009,0.39854,0.39506,0.16407,0.1629,0.16369,0.16377,0.16199,0.16466,0.  
16344,0.15928,0.16051,0.16129,0.1585,0.1629,0.16299,0.16237,0.16283,0.  
16279,0.67267,0.63941,0.64117,0.66441,0.6264,0.66394,0.41619,0.30547,0.  
.33758,0.3677,0.3904,0.4311,0.40847,0.37242,0.33469,0.42433,0.16349,0.  
16155,0.16054,0.16291,0.16538,0.16277,0.16263,0.16274,0.16374,0.16397,  
0.16303,0.1629,0.16278,0.16252,0.16302,0.16285,0.16234,0.63886,0.61731  
,0.63901,0.63385,0.66864,0.62216,0.41268,0.44293,0.40809,0.41004,0.391  
11,0.44634,0.42125,0.39118,0.49561,0.39741,0.40367,0.16162,0.16081,0.1  
6046,0.16469,0.1645,0.16067,0.16215,0.16337,0.16152,0.16615,0.16247,0.  
1649,0.16327,0.14259,0.14424,0.14508,0.16352,0.64005,0.66461,0.64944,0  
.65467,0.67077,0.66816,0.66219,0.38343,0.40272,0.43968,0.37586,0.39281  
,0.4089,0.41784,0.43798,0.4805,0.41722,0.38409,0.16447,0.16445,0.15873  
,0.16314,0.16343,0.16228,0.16152,0.15987,0.16288,0.16342,0.16373,0.145  
24,0.14409,0.14301,0.14842,0.14241,0.14382,0.16076,0.65244,0.62725,0.6  
498,0.66447,0.64119,0.63595,0.6563,0.37165,0.34203,0.43557,0.40401,0.4  
1442,0.47765,0.33472,0.37722,0.41815,0.41344,0.3935,0.16278,0.1619,0.1  
6167,0.16144,0.16124,0.16103,0.16072,0.16177,0.16113,0.14205,0.14677,0  
.14307,0.14142,0.14343,0.14342,0.14605,0.14327,0.14004,0.16269,0.6161,  
0.63782,0.6477,0.64766,0.63654,0.69604,0.69039,0.41601,0.40308,0.40308  
,0.42921,0.40424,0.4109,0.41762,0.39983,0.43866,0.40592,0.43414,0.4146  
9,0.1634,0.16216,0.16393,0.16326,0.16256,0.16496,0.13621,0.14152,0.143  
74,0.14614,0.14497,0.14052,0.14595,0.14293,0.14371,0.14763,0.14743,0.1  
4387,0.62981,0.64688,0.65687,0.66922,0.65402,0.629,0.67534,0.39361,0.3  
8574,0.3997,0.43848,0.45684,0.4061,0.38803,0.40821,0.4431,0.41538,0.31  
273,0.3994,0.16141,0.16007,0.16567,0.14831,0.14618,0.1429,0.14673,0.14  
737,0.14135,0.14785,0.14502,0.14327,0.15033,0.14584,0.14363,0.14704,0.  
14387,0.14387,0.66204,0.65131,0.65692,0.66558,0.64949,0.67145,0.66696,  
0.64707,0.65845,0.40078,0.4351,0.39541,0.41199,0.41518,0.34839,0.45577  
,0.43346,0.40751,0.3858,0.40237,0.14586,0.14114,0.14469,0.14566,0.1465  
1,0.14495,0.14717,0.14292,0.14163,0.14942,0.14466,0.14533,0.14263,0.14  
798,0.14337,0.14542,0.14483,0.14205,0.67003,0.6521,0.61383,0.66996,0.6  
4634,0.63577,0.67299,0.66929,0.65825,0.40011,0.40769,0.31544,0.32493,0  
.32209,0.27702,0.33609,0.29845,0.32104,0.31599,0.30869,0.14553,0.14039  
,0.14513,0.14223,0.14337,0.14119,0.14271,0.13715,0.14517,0.14494,0.152  
38,0.14391,0.14267,0.14962,0.1461,0.14291,0.13479,0.14687,0.666,0.6231  
5,0.65987,0.66634,0.64583,0.66372,0.66959,0.64508,0.63819,0.35763,0.32  
265,0.33108,0.3817,0.35557,0.30921,0.31406,0.27054,0.29057,0.31434,0.3  
6364,0.14436,0.14402,0.14629,0.14349,0.14532,0.14575,0.14473,0.14718,0



.14612,0.14325,0.14044,0.14517,0.14857,0.14325,0.14884,0.13952,0.14658  
,0.14155,0.67879,0.64682,0.63412,0.64194,0.67843,0.67367,0.66903,0.300  
36,0.44301,0.4249,0.31109,0.27311,0.32004,0.31355,0.34062,0.32467,0.32  
035,0.24147,0.2639,0.3076,0.14693,0.14669,0.14871,0.14493,0.14478,0.14  
711,0.14393,0.14375,0.14384,0.14213,0.14245,0.14295,0.14341,0.14228,0.  
14434,0.14429,0.14352,0.1404,0.64794,0.67904,0.64813,0.65403,0.64427,0.  
.65339,0.34642,0.37224,0.40544,0.37649,0.45979,0.35458,0.30075,0.27306  
,0.30425,0.29745,0.2748,0.31841,0.30185,0.31474,0.1449,0.14147,0.14667  
,0.14506,0.14594,0.14422,0.14168,0.1465,0.14397,0.14568,0.14347,0.1483  
7,0.14629,0.14465,0.14245,0.14873,0.14502,0.14073,0.6505,0.66343,0.684  
45,0.65318,0.62413,0.40089,0.37262,0.41944,0.38734,0.43052,0.42398,0.2  
4825,0.33434,0.31399,0.29295,0.32853,0.29922,0.35513,0.32402,0.31014,0.  
.14638,0.1435,0.14138,0.14383,0.1408,0.14324,0.14506,0.14681,0.14384,0.  
.14833,0.14404,0.14608,0.14416,0.1375,0.14343,0.1386,0.14313,0.1404,0.  
61223,0.64305,0.668,0.39861,0.36532,0.37095,0.39592,0.38746,0.37099,0.  
41495,0.40711,0.32201,0.33307,0.31688,0.34894,0.31545,0.31235,0.31635,  
0.32883,0.32232,0.14725,0.14659,0.14492,0.14671,0.14146,0.14454,0.1463  
9,0.14816,0.14235,0.14769,0.14327,0.13899,0.14265,0.14508,0.14146,0.13  
887,0.1473,0.14764,0.63753,0.36246,0.40063,0.3799,0.41236,0.36393,0.38  
797,0.38188,0.36418,0.39368,0.34358,0.32321,0.27852,0.32245,0.28868,0.  
2977,0.27711,0.30607,0.31325,0.14891,0.14252,0.14674,0.14557,0.14889,0.  
.1396,0.14521,0.1448,0.14627,0.14236,0.14082,0.14429,0.1491,0.14736,0.  
1446,0.14551,0.14189,0.1255,0.35636,0.40981,0.46379,0.39155,0.34569,0.  
37195,0.36533,0.37704,0.44077,0.39294,0.30374,0.33467,0.28262,0.32666,  
0.28526,0.30722,0.32715,0.32063,0.31263,0.14226,0.1428,0.14488,0.14429  
,0.14314,0.14474,0.14549,0.14555,0.1453,0.14073,0.14046,0.14331,0.1481  
7,0.14699,0.14097,0.14842,0.14125,0.1276,0.43796,0.34944,0.39056,0.388  
08,0.39518,0.39303,0.39035,0.38421,0.41402,0.41925,0.31533,0.32183,0.3  
2062,0.31608,0.31759,0.32258,0.30225,0.30947,0.14387,0.15227,0.14593,0.  
.14472,0.14486,0.14347,0.14772,0.14544,0.14873,0.14567,0.14552,0.14351  
,0.13848,0.14404,0.14311,0.14769,0.14616,0.15186,0.12671,0.38785,0.402  
5,0.37208,0.33153,0.3927,0.38636,0.39339,0.44037,0.37997,0.38431,0.292  
44,0.33568,0.29844,0.32306,0.31935,0.30815,0.33463,0.30912,0.14494,0.1  
4346,0.13971,0.14506,0.14173,0.14019,0.14297,0.14587,0.14301,0.14519,0.  
.14558,0.14595,0.13963,0.14386,0.14299,0.14576,0.14359,0.12521,0.12828  
,0.12611,0.36952,0.38901,0.38558,0.37307,0.37812,0.53079,0.43623,0.442  
59,0.39794,0.31923,0.29671,0.32293,0.32267,0.3272,0.33416,0.1434,0.140  
97,0.14076,0.14307,0.13984,0.14464,0.1422,0.14404,0.14258,0.14563,0.14  
241,0.14315,0.14118,0.14488,0.14538,0.14255,0.14842,0.15141,0.12325,0.  
12471,0.12606,0.1238,0.36916,0.42989,0.38219,0.3809,0.38253,0.3936,0.3  
5643,0.45264,0.38676,0.29649,0.28531,0.31505,0.14816,0.14565,0.14131,0.  
.14423,0.1412,0.14313,0.14515,0.14418,0.14476,0.14088,0.14198,0.14328,  
0.14126,0.14673,0.13886,0.14257,0.14265,0.14176,0.14217,0.14568,0.1275  
9,0.12746,0.12768,0.12146,0.12472,0.12723,0.393,0.35142,0.38314,0.4220  
3,0.38245,0.39454,0.41917,0.40757,0.1452,0.14106,0.14382,0.14355,0.145  
34,0.14345,0.13994,0.14462,0.14691,0.14036,0.14687,0.14705,0.14453,0.1  
4537,0.14587,0.1465,0.14195,0.14803,0.14633,0.14359,0.14272,0.14391,0.  
14547,0.12357,0.12715,0.12649,0.12538,0.12737,0.1313,0.42275,0.31846,0.  
.3924,0.37606,0.39722,0.12449,0.12599,0.14561,0.14437,0.14233,0.14561,  
0.14399,0.1418,0.14656,0.13977,0.14216,0.14089,0.14485,0.14215,0.1449,  
0.14368,0.14617,0.14528,0.14024,0.14167,0.14474,0.14547,0.1458,0.12565  
,0.12681,0.12521,0.12527,0.1248,0.12601,0.12898,0.12531,0.12623,0.1274

8, 0.50158, 0.42807, 0.12422, 0.12916, 0.12676, 0.12587, 0.13928, 0.14469, 0.14663, 0.14466, 0.1471, 0.14497, 0.14295, 0.14445, 0.14214, 0.14303, 0.13361, 0.14293, 0.14477, 0.14061, 0.14013, 0.14971, 0.14464, 0.14487, 0.14781, 0.12427, 0.12691, 0.12796, 0.12985, 0.1292, 0.127, 0.12728, 0.12499, 0.12853, 0.12647, 0.12542, 0.12571, 0.12594, 0.12615, 0.12031, 0.12476, 0.1269, 0.14481, 0.14489, 0.14265, 0.144, 0.13844, 0.149, 0.14941, 0.14519, 0.14406, 0.14819, 0.14369, 0.1404, 0.14497, 0.1506, 0.14626, 0.14364, 0.12626, 0.12456, 0.12452, 0.12757, 0.12209, 0.12764, 0.1294, 0.12287, 0.12415, 0.12553, 0.12589, 0.12867, 0.12364, 0.12633, 0.1223, 0.13003, 0.12456, 0.12829, 0.12659, 0.14685, 0.14384, 0.14621, 0.14585, 0.14457, 0.14737, 0.14116, 0.14654, 0.1449, 0.14345, 0.1437, 0.14609, 0.14251, 0.12618, 0.1258, 0.1268, 0.12817, 0.12476, 0.1258, 0.1273, 0.12921, 0.12922, 0.12681, 0.12639, 0.12621, 0.12776, 0.12758, 0.12683, 0.12766, 0.12791, 0.12466, 0.12418, 0.12689, 0.12264, 0.14346, 0.14314, 0.14218, 0.14665, 0.14978, 0.13811, 0.1536, 0.13712, 0.14495, 0.13171, 0.1292, 0.12746, 0.12402, 0.12688, 0.12441, 0.12267, 0.12481, 0.12587, 0.12641, 0.12329, 0.12709, 0.12683, 0.12392, 0.12467, 0.12936, 0.12652, 0.12433, 0.12672, 0.12712, 0.12543, 0.12849, 0.12569, 0.12905, 0.1262, 0.14518, 0.14623, 0.14672, 0.14374, 0.12451, 0.12831, 0.12293, 0.1273, 0.12292, 0.12695, 0.12969, 0.12576, 0.12525, 0.12592, 0.12823, 0.12794, 0.12417, 0.12534, 0.13004, 0.12664, 0.12586, 0.12606, 0.12607, 0.12563, 0.12748, 0.12684, 0.12511, 0.12363, 0.12509, 0.12479, 0.12778, 0.12563, 0.12632, 0.12652, 0.1234, 0.12773, 0.12253, 0.12639, 0.12266, 0.12723, 0.12731, 0.12706, 0.12632, 0.12813, 0.12504, 0.1241, 0.12781, 0.12698, 0.12757, 0.1268, 0.12835, 0.12345, 0.12853, 0.12749, 0.12405, 0.12887, 0.12937, 0.12751, 0.12697, 0.12858, 0.12644, 0.12868, 0.12526, 0.1268, 0.12313, 0.12358, 0.12987, 0.12635, 0.13034, 0.12583, 0.12689, 0.1285, 0.12518, 0.12536, 0.12677, 0.12547, 0.1245, 0.12693, 0.1283, 0.12493, 0.12678, 0.12561, 0.1247, 0.12488, 0.12365, 0.12551, 0.12661, 0.12578, 0.12598, 0.12361, 0.12758, 0.1267, 0.12872, 0.12907, 0.12715, 0.12327, 0.12557, 0.12425, 0.1246, 0.12376, 0.12756, 0.12769, 0.12435, 0.12865, 0.12768, 0.12871, 0.12562, 0.12443, 0.12746, 0.1277, 0.13059, 0.12376, 0.12906, 0.12629, 0.12848, 0.12643, 0.12286, 0.12508, 0.12622, 0.12748, 0.12578, 0.12638, 0.12687, 0.12647, 0.13068, 0.12688, 0.12679, 0.125, 0.12558, 0.12574, 0.12609, 0.12592, 0.1272, 0.12646, 0.12329, 0.12855, 0.12541, 0.12599, 0.12898, 0.12694, 0.12921, 0.13065, 0.12773, 0.12845, 0.12544, 0.12427, 0.12797, 0.12773, 0.1264, 0.1282, 0.13027, 0.12296, 0.12755, 0.12632, 0.12862, 0.1253, 0.1266, 0.13203, 0.12717, 0.12919, 0.12597, 0.1282, 0.1281, 0.12906, 0.12774, 0.12528, 0.12504, 0.12435, 0.12579, 0.12511, 0.12811, 0.12468, 0.1273, 0.12792, 0.12633, 0.12892, 0.12688, 0.12623, 0.12591, 0.12436, 0.12535, 0.12661, 0.12541, 0.12575, 0.12674, 0.12621, 0.1286, 0.12704, 0.13062, 0.12591, 0.12673, 0.12776, 0.12546, 0.12581, 0.12917, 0.12424, 0.12893, 0.12796, 0.12423  
0.14714, 0.14649, 0.14868, 0.14722, 0.14786, 0.14635, 0.14909, 0.14936, 0.1447, 0.14677, 0.14833, 0.14661, 0.14571, 0.14784, 0.14544, 0.14708, 0.14619, 0.14734, 0.14688, 0.14893, 0.33239, 0.3664, 0.31156, 0.34199, 0.14519, 0.14803, 0.14752, 0.14769, 0.14851, 0.14753, 0.14648, 0.14613, 0.14817, 0.14694, 0.14835, 0.14792, 0.14695, 0.14713, 0.14723, 0.56717, 0.35726, 0.35653, 0.34596, 0.37537, 0.35248, 0.36705, 0.14678, 0.148, 0.14635, 0.1468, 0.14584, 0.14807, 0.1464, 0.14455, 0.14645, 0.14939, 0.14941, 0.14476, 0.1474, 0.1487, 0.14732, 0.53148, 0.5066, 0.35067, 0.33676, 0.34514, 0.38007, 0.36236, 0.3116, 0.30147, 0.34833, 0.1474, 0.14719, 0.14915, 0.14622, 0.14732, 0.14794, 0.1509, 0.14675, 0.14681, 0.14736, 0.14756, 0.14608, 0.14563, 0.14818, 0.14691, 0.51979, 0.52052, 0.57186, 0.34238, 0.36145, 0.31959, 0.31051, 0.34501, 0.34604, 0.34564, 0.29116, 0.41131, 0.14549, 0.1481, 0.14561, 0.1455, 0.14765, 0.14826, 0.14807, 0.14955, 0.1473, 0.14667, 0.14717, 0.14628, 0.15042, 0.14766, 0.14601, 0.15098, 0.56522, 0.519

87,0.54984,0.57795,0.31712,0.35718,0.34555,0.35207,0.35992,0.34424,0.34079,0.32578,0.34277,0.33441,0.15005,0.14818,0.14917,0.14804,0.14689,0.15049,0.14856,0.14522,0.14585,0.14672,0.14429,0.14867,0.14798,0.14744,0.14745,0.14763,0.55643,0.5149,0.53365,0.53975,0.53032,0.5444,0.35414,0.26617,0.29079,0.31959,0.3323,0.3679,0.34459,0.31775,0.282,0.36005,0.1488,0.1462,0.14508,0.14822,0.14977,0.14784,0.14655,0.14857,0.14838,0.14854,0.14792,0.14655,0.14737,0.14764,0.14894,0.14772,0.14683,0.54204,0.52071,0.5396,0.52598,0.55616,0.51027,0.34802,0.38382,0.34845,0.35068,0.33244,0.38112,0.36061,0.33698,0.41373,0.33082,0.34813,0.14717,0.14558,0.14614,0.15036,0.15035,0.14642,0.14785,0.14832,0.14684,0.15274,0.1476,0.14851,0.14853,0.12382,0.12515,0.12572,0.14932,0.52313,0.55091,0.54723,0.54235,0.57096,0.56776,0.55622,0.31956,0.34705,0.36987,0.32121,0.33152,0.34784,0.35312,0.36786,0.4035,0.35598,0.32212,0.14899,0.14976,0.14335,0.14854,0.14831,0.14665,0.14683,0.14472,0.14588,0.14747,0.14918,0.12544,0.12459,0.12238,0.1301,0.12288,0.12351,0.1459,0.54586,0.51741,0.54506,0.56037,0.52823,0.53215,0.53876,0.31537,0.2975,0.36674,0.3414,0.34264,0.4029,0.28829,0.32195,0.36282,0.35818,0.33334,0.1495,0.14773,0.14716,0.14601,0.14656,0.14674,0.14691,0.14619,0.14602,0.12247,0.12824,0.12369,0.12182,0.124,0.12405,0.12646,0.12454,0.12122,0.14753,0.51371,0.5278,0.54201,0.53407,0.51622,0.58057,0.58324,0.35838,0.33688,0.33519,0.3695,0.34682,0.34963,0.34911,0.33609,0.38011,0.34426,0.36408,0.35897,0.14778,0.14679,0.14924,0.14842,0.14765,0.15059,0.11704,0.12231,0.1242,0.12773,0.12563,0.12167,0.12649,0.12452,0.12498,0.13031,0.12804,0.12419,0.50229,0.53929,0.54683,0.55835,0.54686,0.52734,0.57883,0.3308,0.32219,0.33747,0.3747,0.38698,0.33954,0.32816,0.34077,0.37703,0.35275,0.2705,0.33918,0.14654,0.14523,0.15086,0.12869,0.12592,0.12205,0.12885,0.12921,0.12263,0.12941,0.126,0.12293,0.13142,0.12761,0.12456,0.12685,0.12509,0.12425,0.54784,0.54073,0.54958,0.54352,0.53041,0.56221,0.56023,0.526,0.53981,0.33853,0.36798,0.33178,0.35826,0.35355,0.29391,0.38558,0.36426,0.33878,0.32318,0.34356,0.12837,0.12204,0.12514,0.12582,0.12727,0.12531,0.12835,0.12356,0.12127,0.13156,0.12684,0.1243,0.12271,0.12715,0.12408,0.12822,0.12454,0.12196,0.56174,0.5576,0.49814,0.55592,0.5343,0.52755,0.56635,0.5655,0.54236,0.34301,0.34521,0.26641,0.27457,0.2781,0.23643,0.27823,0.25044,0.2693,0.2636,0.26166,0.12693,0.12005,0.12618,0.12303,0.12569,0.12284,0.12259,0.11639,0.12627,0.1255,0.13362,0.12563,0.12554,0.13052,0.12631,0.12517,0.11438,0.12769,0.57093,0.51592,0.54927,0.5665,0.53613,0.56569,0.56395,0.5367,0.53196,0.29074,0.27025,0.27582,0.32065,0.29823,0.25817,0.26301,0.23334,0.23881,0.26254,0.3029,0.12527,0.1255,0.12562,0.1241,0.12602,0.12576,0.12491,0.12904,0.1269,0.12527,0.12066,0.12618,0.13078,0.12333,0.12935,0.12015,0.12767,0.12162,0.57326,0.55105,0.5182,0.54194,0.56182,0.57093,0.55612,0.25022,0.36855,0.35966,0.26808,0.23512,0.26758,0.26505,0.28564,0.27451,0.2706,0.20773,0.2249,0.25834,0.12839,0.12814,0.13015,0.12653,0.1259,0.12763,0.12497,0.12482,0.12598,0.12177,0.12377,0.12557,0.12392,0.12257,0.12465,0.12567,0.12502,0.12165,0.55577,0.57091,0.54481,0.55344,0.53984,0.55429,0.29084,0.31511,0.33745,0.31021,0.38593,0.29137,0.24763,0.23203,0.25879,0.24892,0.23242,0.2676,0.2572,0.26663,0.12544,0.12142,0.1274,0.1267,0.12723,0.12649,0.12476,0.12663,0.12578,0.12619,0.12406,0.12923,0.12647,0.12529,0.12356,0.13023,0.12601,0.11996,0.54751,0.54753,0.57222,0.53847,0.51003,0.33065,0.30714,0.34869,0.32768,0.35998,0.35444,0.21098,0.28514,0.26571,0.24879,0.28032,0.25069,0.30027,0.27069,0.26684,0.12682,0.12272,0.12037,0.12452,0.12154,0.12382,0.12609,0.12713,0.12529,

0.12926,0.12515,0.12582,0.12587,0.11738,0.12399,0.11801,0.12345,0.1222  
4,0.51403,0.53493,0.57027,0.32255,0.30616,0.31034,0.33549,0.31991,0.30  
372,0.34115,0.33426,0.26918,0.27856,0.2647,0.29487,0.26549,0.26541,0.2  
6655,0.27567,0.27444,0.12893,0.12753,0.12516,0.12918,0.12202,0.12706,0  
.1272,0.12927,0.12359,0.13001,0.12401,0.12031,0.12417,0.12651,0.12082,  
0.12108,0.12806,0.12939,0.52742,0.30456,0.33135,0.31715,0.34116,0.2979  
3,0.32327,0.3175,0.29854,0.3215,0.29406,0.2751,0.23641,0.27736,0.24094  
,0.25242,0.23508,0.26482,0.26769,0.1297,0.12231,0.127,0.12681,0.13038,  
0.11992,0.12541,0.12627,0.12747,0.12258,0.12192,0.12565,0.13121,0.1273  
8,0.12407,0.12671,0.1222,0.10273,0.29315,0.34308,0.38882,0.31732,0.293  
03,0.306,0.30063,0.31414,0.37141,0.32476,0.25073,0.2861,0.24213,0.2762  
9,0.23984,0.25873,0.27069,0.26623,0.26073,0.12312,0.12271,0.12568,0.12  
549,0.12298,0.12588,0.12617,0.12505,0.12526,0.12142,0.11996,0.12497,0.  
12884,0.12761,0.12163,0.13091,0.12291,0.10538,0.35718,0.28449,0.32717,  
0.32257,0.32895,0.32744,0.32681,0.32065,0.3519,0.34148,0.26961,0.26942  
,0.27097,0.26522,0.26402,0.26784,0.25345,0.25938,0.12515,0.13378,0.126  
93,0.12669,0.12414,0.12458,0.12795,0.1272,0.13106,0.12714,0.12677,0.12  
29,0.12028,0.12489,0.12467,0.129,0.12712,0.1349,0.10301,0.33158,0.3450  
3,0.3057,0.27641,0.32852,0.32091,0.31541,0.36616,0.31484,0.31725,0.250  
25,0.27991,0.25167,0.27765,0.2734,0.263,0.28466,0.26084,0.12556,0.1253  
3,0.11888,0.12627,0.12304,0.11987,0.12445,0.12709,0.12254,0.12624,0.12  
677,0.12639,0.12032,0.12515,0.12419,0.12707,0.12448,0.10239,0.10572,0.  
10324,0.30111,0.32305,0.32711,0.30599,0.31692,0.44023,0.36927,0.36427,  
0.32737,0.26745,0.25104,0.27362,0.27387,0.27693,0.27936,0.12425,0.1227  
,0.12232,0.12412,0.12111,0.12569,0.1214,0.12545,0.12182,0.1264,0.12438  
,0.12508,0.12302,0.12534,0.12589,0.12442,0.12872,0.13359,0.10109,0.103  
81,0.10437,0.099134,0.31733,0.35911,0.31929,0.31589,0.31361,0.33447,0.  
3002,0.38341,0.31952,0.25002,0.2408,0.26291,0.12951,0.12649,0.12161,0.  
12551,0.12196,0.1237,0.12652,0.12385,0.12667,0.12196,0.12315,0.1245,0.  
12009,0.12706,0.12042,0.12251,0.12435,0.12257,0.12412,0.12731,0.10398,  
0.10432,0.1045,0.098548,0.10297,0.10317,0.32825,0.2891,0.3161,0.3494,0  
.3182,0.33132,0.33949,0.33118,0.12645,0.12235,0.12611,0.12334,0.12641,  
0.12282,0.12145,0.12666,0.12687,0.12086,0.12756,0.12934,0.12608,0.1246  
,0.12612,0.12567,0.12081,0.12862,0.12725,0.12311,0.1235,0.12423,0.1258  
5,0.10021,0.10369,0.10321,0.10164,0.10336,0.10807,0.3539,0.26377,0.317  
41,0.30928,0.32509,0.1006,0.10205,0.1276,0.12634,0.12285,0.12738,0.123  
85,0.1226,0.12604,0.1199,0.12361,0.1219,0.12482,0.12468,0.12551,0.1249  
,0.1277,0.1262,0.1209,0.12338,0.12686,0.12568,0.12692,0.10182,0.10427,  
0.10315,0.10183,0.10227,0.10237,0.10635,0.1044,0.10232,0.1059,0.42766,  
0.36102,0.10072,0.10739,0.10391,0.10298,0.11918,0.12609,0.12743,0.1255  
,0.12832,0.12575,0.12349,0.12442,0.12275,0.12305,0.11194,0.12379,0.125  
68,0.12119,0.12029,0.1327,0.12507,0.12484,0.12818,0.10014,0.10319,0.10  
51,0.10686,0.10538,0.10389,0.10539,0.10205,0.10462,0.10405,0.10042,0.1  
0113,0.10305,0.10355,0.096988,0.1022,0.10399,0.12593,0.1267,0.12387,0.  
12356,0.11711,0.1309,0.1296,0.12473,0.12487,0.13014,0.12519,0.12084,0.  
12658,0.13342,0.12771,0.12359,0.10366,0.10211,0.10149,0.10382,0.097222  
,0.10538,0.10542,0.10043,0.10056,0.10333,0.10355,0.10621,0.10218,0.104  
91,0.099927,0.10579,0.10111,0.1043,0.10217,0.12738,0.12538,0.12801,0.1  
2571,0.12641,0.12869,0.12015,0.12855,0.12591,0.12364,0.12485,0.12623,0  
.12265,0.10212,0.10152,0.10305,0.10532,0.10116,0.10339,0.10124,0.10553  
,0.1043,0.10271,0.10344,0.10299,0.10429,0.10447,0.10308,0.1052,0.10449  
,0.10224,0.10071,0.10395,0.099313,0.12578,0.12299,0.12283,0.12759,0.13

248,0.11913,0.13626,0.11674,0.12591,0.10722,0.10535,0.10399,0.10184,0.10292,0.10051,0.098333,0.10205,0.10289,0.10271,0.10032,0.10329,0.10338,0.10043,0.10193,0.10769,0.10205,0.10075,0.10237,0.10383,0.10134,0.10528,0.10255,0.10688,0.10358,0.1254,0.12701,0.12764,0.12553,0.10259,0.10517,0.099394,0.10348,0.10054,0.10306,0.10514,0.10229,0.10221,0.10131,0.10486,0.10331,0.10135,0.10304,0.10733,0.10463,0.10341,0.10462,0.10323,0.10235,0.10278,0.10274,0.10184,0.10194,0.10235,0.10121,0.10313,0.10234,0.10295,0.10359,0.10043,0.10567,0.10046,0.10359,0.09985,0.10435,0.10388,0.10326,0.10387,0.10554,0.10229,0.10024,0.10411,0.10346,0.10392,0.10282,0.10448,0.10046,0.10392,0.10594,0.1006,0.10641,0.10707,0.10482,0.10443,0.10515,0.1032,0.10437,0.10127,0.10376,0.10061,0.10097,0.10642,0.10134,0.10643,0.10263,0.10446,0.10492,0.10206,0.10163,0.10411,0.10212,0.10054,0.10331,0.10513,0.10194,0.10377,0.10316,0.10247,0.10098,0.099603,0.10289,0.10309,0.1025,0.10144,0.10023,0.10463,0.10432,0.10521,0.10448,0.10402,0.101,0.10262,0.10122,0.1018,0.099714,0.10359,0.10319,0.1008,0.10549,0.10391,0.10512,0.10239,0.10161,0.10331,0.10414,0.10905,0.10006,0.10627,0.10361,0.10494,0.10297,0.098777,0.10214,0.10353,0.10395,0.10272,0.10235,0.10401,0.10385,0.10744,0.10375,0.10376,0.10178,0.10308,0.10162,0.10352,0.1025,0.10378,0.10324,0.10096,0.10408,0.10276,0.10288,0.1054,0.10365,0.10476,0.1087,0.10485,0.10358,0.10134,0.1018,0.10562,0.1047,0.1027,0.10475,0.10719,0.099368,0.10331,0.10413,0.10583,0.10123,0.10346,0.10818,0.10408,0.10461,0.10433,0.10455,0.10469,0.10493,0.10364,0.10168,0.10201,0.10124,0.10115,0.10313,0.10447,0.10099,0.1033,0.10405,0.10177,0.10573,0.10483,0.10393,0.10273,0.10266,0.10168,0.10354,0.10149,0.10309,0.10423,0.10241,0.10608,0.10485,0.10742,0.10219,0.10401,0.10496,0.10214,0.10325,0.10597,0.10148,0.10567,0.10444,0.10018,0.13215,0.13187,0.13407,0.13219,0.1346,0.13233,0.13485,0.13542,0.13025,0.13099,0.13473,0.13142,0.13091,0.13324,0.13168,0.13375,0.13081,0.13209,0.13251,0.13465,0.2936,0.32471,0.27667,0.30308,0.13022,0.1334,0.13253,0.13441,0.13395,0.13367,0.13157,0.13131,0.13357,0.13184,0.1337,0.13371,0.13314,0.13329,0.13299,0.49787,0.31974,0.31316,0.31334,0.33001,0.31794,0.3209,0.13182,0.13355,0.13254,0.13269,0.131,0.13407,0.13124,0.12943,0.13275,0.13577,0.13401,0.13073,0.1328,0.13434,0.13264,0.46371,0.44454,0.30525,0.29641,0.30981,0.33614,0.31769,0.27551,0.26795,0.30725,0.13283,0.13321,0.13546,0.13255,0.13406,0.13368,0.13583,0.13408,0.13208,0.13311,0.13264,0.13211,0.13142,0.13504,0.13168,0.44787,0.44814,0.50415,0.30936,0.31869,0.28532,0.28143,0.30486,0.2971,0.30333,0.26098,0.36538,0.1303,0.13491,0.13125,0.1314,0.13349,0.13427,0.13349,0.13429,0.13314,0.13274,0.13175,0.13227,0.13624,0.13215,0.1316,0.13603,0.49322,0.45759,0.48653,0.50936,0.27463,0.31139,0.30543,0.3083,0.31195,0.30746,0.29933,0.29284,0.304,0.28937,0.1358,0.13323,0.13381,0.1329,0.13259,0.13472,0.13402,0.13101,0.13244,0.13126,0.12994,0.13377,0.13411,0.13248,0.13293,0.13367,0.49126,0.44407,0.46024,0.4633,0.45561,0.47209,0.31152,0.23619,0.25709,0.27866,0.28905,0.32753,0.30685,0.28115,0.24832,0.30928,0.13429,0.13179,0.13106,0.134,0.13512,0.13312,0.13214,0.13407,0.13348,0.13399,0.13389,0.13099,0.13276,0.13292,0.13529,0.1341,0.13226,0.45822,0.4684,0.46986,0.46051,0.50196,0.44041,0.31097,0.34646,0.31417,0.32184,0.29633,0.33614,0.31995,0.30147,0.36645,0.28874,0.30746,0.13374,0.13308,0.13141,0.13602,0.1366,0.13192,0.13274,0.13346,0.13292,0.13827,0.13437,0.13409,0.13407,0.10814,0.11012,0.11111,0.13441,0.44505,0.49129,0.47795,0.46636,0.50699,0.49229,0.49217,0.28187,0.30694,0.32378,0.28398,0.2943,0.30802,0.31958,0.32717,0.35294,0.3098,0.28645,0.13383,0.135

46,0.12975,0.13227,0.13307,0.13165,0.1329,0.13017,0.13116,0.1334,0.135  
28,0.11025,0.10955,0.10627,0.11513,0.1089,0.10773,0.13217,0.48031,0.45  
078,0.47248,0.48102,0.46095,0.46238,0.48036,0.27982,0.26444,0.32005,0.  
30014,0.29775,0.35793,0.26154,0.28562,0.32456,0.32051,0.30009,0.13389,  
0.13218,0.13298,0.13266,0.13149,0.1312,0.13263,0.13092,0.1326,0.10679,  
0.11221,0.10657,0.10753,0.10941,0.10772,0.11164,0.10887,0.10689,0.1331  
7,0.45334,0.45743,0.47403,0.47312,0.44365,0.50031,0.51642,0.30999,0.29  
955,0.29814,0.32696,0.30998,0.3106,0.30558,0.29534,0.33411,0.30723,0.3  
1634,0.31656,0.13309,0.13362,0.13502,0.13373,0.13298,0.13619,0.10191,0  
.10581,0.10876,0.11136,0.1103,0.10558,0.11044,0.10936,0.10909,0.1164,0  
.11141,0.10798,0.44857,0.47258,0.47087,0.48146,0.47563,0.47255,0.50607  
,0.2917,0.28973,0.3078,0.33546,0.34197,0.29489,0.28882,0.30171,0.33451  
,0.31505,0.24151,0.30105,0.13317,0.131,0.13647,0.11326,0.11102,0.10697  
,0.11317,0.11382,0.10845,0.11383,0.11041,0.10887,0.1154,0.11145,0.1082  
1,0.11083,0.10861,0.10879,0.48174,0.47266,0.47365,0.46314,0.46562,0.50  
323,0.4868,0.4586,0.48358,0.30229,0.31987,0.29937,0.31991,0.31523,0.26  
54,0.33858,0.32904,0.30178,0.29338,0.29652,0.11316,0.10653,0.10949,0.1  
1025,0.11148,0.10954,0.11305,0.10826,0.10493,0.11555,0.11152,0.10845,0  
.10775,0.11147,0.10791,0.11336,0.10893,0.1058,0.49206,0.50418,0.43325,  
0.49149,0.46123,0.44964,0.49717,0.49344,0.46533,0.30107,0.3005,0.2331,  
0.24019,0.24167,0.20294,0.23931,0.22225,0.24044,0.22678,0.22778,0.1113  
2,0.10428,0.11172,0.10835,0.10875,0.10835,0.10687,0.10041,0.11051,0.10  
971,0.11834,0.11077,0.10949,0.11617,0.11017,0.10922,0.098249,0.11436,0  
.49998,0.45276,0.49141,0.50922,0.47431,0.48555,0.50596,0.47181,0.45822  
,0.25594,0.23904,0.23884,0.28344,0.26093,0.22828,0.22877,0.20448,0.206  
53,0.23026,0.26953,0.10991,0.1108,0.11108,0.10856,0.11124,0.10976,0.11  
019,0.11454,0.11156,0.11034,0.10582,0.11098,0.11542,0.10762,0.11465,0.  
10448,0.11205,0.10606,0.49997,0.46418,0.44653,0.48595,0.49591,0.49494,  
0.49753,0.21848,0.31672,0.31371,0.23564,0.20634,0.23353,0.23578,0.2536  
5,0.24313,0.23835,0.18144,0.19599,0.22213,0.11267,0.11393,0.11315,0.11  
012,0.11098,0.11192,0.10994,0.10926,0.11131,0.10759,0.10817,0.10893,0.  
10856,0.10697,0.10943,0.11037,0.10786,0.10638,0.48819,0.504,0.48696,0.  
49561,0.47661,0.48043,0.25541,0.27252,0.29378,0.27047,0.3409,0.25665,0  
.2159,0.20434,0.22233,0.21512,0.20533,0.2338,0.22586,0.2312,0.1108,0.1  
0615,0.11082,0.11033,0.11193,0.11155,0.10911,0.11195,0.11037,0.11007,0  
.10888,0.11423,0.11087,0.11145,0.10907,0.11555,0.10978,0.10421,0.47554  
,0.47191,0.49729,0.46822,0.44706,0.28729,0.27023,0.3017,0.2878,0.32291  
,0.31249,0.18648,0.25064,0.23898,0.22079,0.24793,0.2183,0.26452,0.2363  
9,0.22872,0.11168,0.10825,0.10457,0.1101,0.10535,0.10909,0.11109,0.111  
4,0.11021,0.11429,0.11001,0.1106,0.10983,0.10188,0.10916,0.10229,0.107  
55,0.10695,0.43938,0.46077,0.51735,0.28477,0.26145,0.26828,0.28417,0.2  
8031,0.26326,0.29186,0.29586,0.23636,0.24166,0.23419,0.25929,0.23572,0  
.24135,0.23534,0.23368,0.24092,0.11402,0.11223,0.10993,0.11383,0.10545  
,0.11118,0.11324,0.11381,0.10868,0.11535,0.10909,0.10532,0.10988,0.111  
18,0.10546,0.10575,0.11209,0.11489,0.46691,0.26666,0.29126,0.28169,0.2  
9373,0.26887,0.29055,0.27789,0.2617,0.27886,0.25762,0.24039,0.20885,0.  
23855,0.21251,0.22008,0.20661,0.23618,0.23346,0.11442,0.10532,0.11122,  
0.11105,0.11512,0.10434,0.10817,0.11161,0.11277,0.10665,0.10699,0.1101  
6,0.11524,0.11087,0.10812,0.11058,0.10703,0.086803,0.25799,0.30916,0.3  
4129,0.28381,0.26074,0.27072,0.2631,0.27243,0.33545,0.2812,0.22175,0.2  
5079,0.21642,0.24176,0.21083,0.22245,0.235,0.23256,0.23262,0.10751,0.1  
0708,0.1093,0.1115,0.10675,0.11051,0.11078,0.10984,0.11017,0.10491,0.1

0547,0.11029,0.11242,0.11205,0.10499,0.11606,0.10841,0.089766,0.31065,  
0.25028,0.29186,0.27473,0.28675,0.28005,0.28222,0.2762,0.3084,0.28959,  
0.23455,0.24493,0.23946,0.2324,0.23203,0.23176,0.22216,0.22625,0.10995  
,0.11902,0.11207,0.11062,0.10898,0.10953,0.11222,0.11205,0.11569,0.112  
36,0.11127,0.10757,0.1058,0.10962,0.10883,0.11398,0.11229,0.12013,0.08  
7087,0.29375,0.29942,0.27029,0.2369,0.29679,0.27922,0.27319,0.32034,0.  
27192,0.27366,0.22489,0.2456,0.22191,0.24201,0.24424,0.23152,0.24554,0  
.2273,0.10924,0.11039,0.10358,0.11096,0.10748,0.10513,0.11011,0.11105,  
0.10763,0.11157,0.11218,0.11087,0.10409,0.10951,0.10799,0.11131,0.1096  
8,0.085307,0.088442,0.087106,0.2609,0.27528,0.28997,0.26746,0.27346,0.  
39588,0.32463,0.32175,0.28934,0.24137,0.22012,0.24052,0.24027,0.24738,  
0.24407,0.1092,0.10692,0.10695,0.10835,0.1062,0.11005,0.10564,0.11035,  
0.1056,0.11063,0.10878,0.11004,0.10784,0.10913,0.11009,0.11007,0.11493  
,0.11773,0.086003,0.087199,0.08874,0.083434,0.27857,0.3107,0.2742,0.27  
547,0.27249,0.29135,0.26157,0.3335,0.27871,0.2215,0.20992,0.23099,0.11  
281,0.1114,0.10745,0.1101,0.10693,0.10812,0.11171,0.10782,0.11121,0.10  
682,0.10734,0.11068,0.10437,0.11181,0.10569,0.10718,0.10909,0.10728,0.  
10835,0.11224,0.086739,0.089072,0.087244,0.084775,0.086748,0.087986,0.  
2806,0.25399,0.27175,0.31235,0.28659,0.29095,0.29546,0.28301,0.10983,0  
.10935,0.11248,0.10757,0.11146,0.10901,0.1061,0.11146,0.11235,0.1042,0  
.11284,0.11411,0.11141,0.11017,0.11128,0.11043,0.10498,0.11264,0.11008  
,0.1079,0.10895,0.10993,0.10969,0.083769,0.08654,0.087665,0.085188,0.0  
86353,0.090373,0.30733,0.23281,0.27452,0.27156,0.28358,0.085347,0.0849  
11,0.11192,0.11101,0.1077,0.113,0.10947,0.1073,0.11176,0.10581,0.1075,  
0.10695,0.10939,0.10863,0.11002,0.11074,0.11222,0.11007,0.10647,0.1086  
3,0.11136,0.11034,0.11204,0.08537,0.086001,0.087683,0.084839,0.0858,0.  
085714,0.089644,0.08847,0.086334,0.090085,0.37683,0.32767,0.085093,0.0  
89161,0.086993,0.086401,0.10285,0.10965,0.11118,0.11005,0.1128,0.1091,  
0.10753,0.1084,0.10791,0.10726,0.094725,0.10921,0.11036,0.10625,0.1041  
2,0.11825,0.11025,0.10964,0.11277,0.084473,0.086714,0.088646,0.089382,  
0.087189,0.086737,0.08799,0.086375,0.087415,0.087714,0.08325,0.083971,  
0.086515,0.087158,0.080954,0.085731,0.088104,0.11051,0.11253,0.10934,0  
.1077,0.10161,0.11628,0.11433,0.10911,0.10877,0.11483,0.10988,0.1058,0  
.11125,0.11891,0.11147,0.10909,0.087207,0.086637,0.086991,0.087317,0.0  
81515,0.090967,0.089835,0.083528,0.083882,0.087935,0.087289,0.09001,0.  
085319,0.087139,0.083562,0.088256,0.086175,0.087685,0.087012,0.11184,0  
.10946,0.11288,0.11132,0.11162,0.11343,0.10529,0.11334,0.11035,0.10787  
,0.11002,0.11094,0.10761,0.085515,0.084749,0.087492,0.089757,0.085906,  
0.087448,0.084476,0.089352,0.088405,0.08758,0.087115,0.086423,0.087844  
,0.086539,0.085718,0.088425,0.087149,0.08603,0.084138,0.087551,0.08509  
5,0.10987,0.10707,0.10841,0.11145,0.1166,0.1051,0.12137,0.1011,0.11058  
,0.090789,0.088017,0.087651,0.084749,0.087151,0.08464,0.083548,0.08557  
2,0.086554,0.085944,0.082638,0.088047,0.087506,0.084036,0.085457,0.091  
639,0.08731,0.084744,0.08494,0.087266,0.085061,0.08893,0.083747,0.0916  
09,0.088652,0.10892,0.11098,0.111,0.10939,0.085231,0.088975,0.08321,0.  
088304,0.084054,0.088711,0.088082,0.085618,0.087001,0.084757,0.087837,  
0.086686,0.08582,0.085883,0.091017,0.087056,0.086831,0.088522,0.087599  
,0.086501,0.086469,0.086757,0.085357,0.086299,0.087748,0.08516,0.08689  
6,0.084639,0.087167,0.088323,0.085686,0.089434,0.08449,0.087685,0.0837  
44,0.08994,0.087092,0.085996,0.087452,0.089357,0.08586,0.082697,0.0880  
68,0.086464,0.087767,0.086974,0.087836,0.085071,0.089942,0.089311,0.08  
4291,0.090321,0.091143,0.089642,0.088918,0.088297,0.086706,0.086902,0.

084694,0.088862,0.085849,0.085505,0.089256,0.084463,0.089242,0.086172,  
0.086298,0.088148,0.084798,0.087236,0.087755,0.086539,0.083692,0.08714  
8,0.089639,0.085915,0.0871,0.085299,0.087459,0.08452,0.08506,0.087605,  
0.087105,0.08455,0.085022,0.085362,0.08632,0.08758,0.089354,0.087987,0  
.087909,0.085912,0.086426,0.085909,0.08502,0.084792,0.088296,0.085984,  
0.084751,0.088905,0.087729,0.088565,0.087678,0.085702,0.085802,0.08752  
5,0.089987,0.086503,0.089112,0.08714,0.088002,0.088346,0.08081,0.08604  
,0.088045,0.088184,0.08706,0.085754,0.08815,0.087376,0.091888,0.087628  
,0.08733,0.085577,0.0851,0.085441,0.087759,0.086688,0.088122,0.086449,  
0.0853,0.087429,0.085438,0.085938,0.087743,0.087603,0.088011,0.090595,  
0.088515,0.086743,0.086133,0.085743,0.090033,0.087296,0.086468,0.08819  
3,0.089836,0.082055,0.087246,0.088161,0.088778,0.084917,0.086244,0.090  
659,0.088481,0.086199,0.087982,0.088598,0.087354,0.087746,0.086478,0.0  
84487,0.08705,0.085413,0.084633,0.087401,0.088461,0.084838,0.086649,0.  
088738,0.084868,0.088531,0.088604,0.088384,0.08669,0.087156,0.085743,0  
.0862,0.085802,0.085187,0.088154,0.087315,0.089207,0.088847,0.090853,0  
.084806,0.088316,0.088651,0.085269,0.08622,0.090273,0.086062,0.089549,  
0.087484,0.083667  
0.11975,0.12003,0.12068,0.11958,0.12186,0.1189,0.12178,0.12238,0.11834  
,0.11957,0.12154,0.1193,0.11838,0.12073,0.11792,0.12115,0.1182,0.11917  
,0.12066,0.1212,0.26417,0.29717,0.24951,0.28236,0.11718,0.12047,0.1200  
4,0.12261,0.121,0.12274,0.11966,0.11771,0.12207,0.12022,0.12088,0.1209  
4,0.12056,0.12076,0.12117,0.44873,0.29852,0.27792,0.28803,0.3032,0.297  
68,0.2886,0.11963,0.11972,0.1201,0.11985,0.11849,0.12153,0.11817,0.117  
28,0.12009,0.12263,0.12058,0.11932,0.11877,0.122,0.11867,0.41409,0.403  
87,0.28019,0.27247,0.28321,0.30416,0.28522,0.251,0.2421,0.2839,0.11963  
,0.12041,0.12316,0.1195,0.12166,0.12099,0.12226,0.12104,0.12015,0.1211  
6,0.12059,0.1201,0.11796,0.12203,0.1188,0.40393,0.40124,0.47487,0.2912  
9,0.29087,0.25473,0.25376,0.27399,0.2616,0.28039,0.23558,0.33193,0.117  
66,0.12203,0.11872,0.11845,0.12086,0.12128,0.12016,0.1212,0.12013,0.11  
89,0.11838,0.11898,0.12296,0.11943,0.11889,0.12392,0.45184,0.414,0.446  
05,0.48366,0.25171,0.28042,0.28004,0.28201,0.28154,0.2818,0.26504,0.26  
889,0.27874,0.2624,0.12343,0.12071,0.12085,0.12011,0.11946,0.12173,0.1  
2112,0.11924,0.11971,0.11812,0.11826,0.12017,0.12066,0.12035,0.11902,0  
.12069,0.44602,0.40171,0.41619,0.4242,0.41185,0.43205,0.28256,0.21932,  
0.23779,0.26096,0.25112,0.30607,0.27872,0.24932,0.22776,0.2878,0.12124  
,0.11755,0.11824,0.12118,0.12279,0.12034,0.11919,0.12061,0.12086,0.122  
08,0.12115,0.11795,0.11924,0.12057,0.1224,0.12079,0.1194,0.41194,0.432  
53,0.41721,0.40729,0.45728,0.41135,0.28466,0.30748,0.28779,0.29845,0.2  
7282,0.3117,0.29254,0.27152,0.33954,0.26408,0.2793,0.12001,0.11967,0.1  
1942,0.12303,0.12358,0.11975,0.11896,0.12063,0.12112,0.12568,0.1214,0.  
12107,0.12075,0.096587,0.097796,0.099647,0.12073,0.40792,0.43939,0.435  
28,0.41633,0.45755,0.44441,0.4505,0.25002,0.27915,0.29349,0.26262,0.27  
232,0.28441,0.29011,0.3005,0.31529,0.28374,0.26336,0.12073,0.12321,0.1  
169,0.11906,0.1196,0.11923,0.11969,0.11781,0.11902,0.12032,0.12299,0.0  
99381,0.097968,0.094493,0.10435,0.096871,0.093549,0.11973,0.44615,0.41  
763,0.43347,0.44436,0.42333,0.42345,0.43827,0.26107,0.23899,0.29402,0.  
27169,0.273,0.32702,0.23941,0.25753,0.30873,0.29116,0.27253,0.1207,0.1  
1972,0.12018,0.12084,0.11906,0.11901,0.1207,0.11829,0.11968,0.096513,0  
.099462,0.0956,0.097374,0.097515,0.095685,0.098497,0.097137,0.095322,0  
.12038,0.42821,0.41584,0.43858,0.43434,0.3937,0.46132,0.47878,0.27853,  
0.26208,0.26897,0.29952,0.27467,0.28438,0.27533,0.26482,0.30282,0.2785



9,0.28917,0.28064,0.12021,0.1207,0.12267,0.12047,0.12053,0.12343,0.090  
253,0.093975,0.097935,0.10025,0.098705,0.093747,0.099573,0.09785,0.097  
873,0.10484,0.099286,0.096529,0.4091,0.43712,0.43372,0.43677,0.44472,0  
.44065,0.45564,0.26536,0.26893,0.27281,0.29615,0.31637,0.2679,0.26159,  
0.27524,0.30564,0.28718,0.21731,0.28021,0.12073,0.11792,0.12412,0.1011  
8,0.10032,0.095267,0.10057,0.103,0.09618,0.10135,0.098247,0.097681,0.1  
0322,0.099154,0.097891,0.098458,0.096044,0.097134,0.44122,0.42102,0.44  
622,0.41782,0.4314,0.44948,0.43038,0.4042,0.43338,0.2787,0.29538,0.271  
18,0.29685,0.28378,0.24229,0.3148,0.28724,0.2748,0.26436,0.27209,0.099  
72,0.094684,0.097832,0.09793,0.099931,0.09718,0.10138,0.096345,0.09308  
5,0.10316,0.099572,0.096933,0.095692,0.099496,0.097368,0.10057,0.09610  
2,0.093858,0.44129,0.46105,0.39966,0.44913,0.42107,0.42434,0.46022,0.4  
515,0.42171,0.27123,0.26458,0.2073,0.21722,0.21972,0.18523,0.21643,0.1  
998,0.21147,0.20003,0.21051,0.098857,0.093009,0.099168,0.096888,0.0985  
33,0.096545,0.094043,0.08879,0.098727,0.097217,0.10518,0.098824,0.0972  
7,0.10375,0.09935,0.09737,0.08544,0.10248,0.46106,0.4086,0.45187,0.458  
17,0.43242,0.43705,0.46379,0.43524,0.41446,0.2366,0.21546,0.21152,0.25  
44,0.2397,0.20801,0.20704,0.18621,0.18664,0.20654,0.25129,0.097147,0.0  
98605,0.099223,0.096711,0.099666,0.098582,0.098254,0.1028,0.098924,0.0  
99379,0.094656,0.099512,0.10238,0.096215,0.10359,0.093215,0.099434,0.0  
93288,0.44045,0.42278,0.39416,0.44094,0.46547,0.43697,0.45061,0.20378,  
0.29337,0.27949,0.2205,0.18961,0.20989,0.21619,0.23014,0.21949,0.2184,  
0.1628,0.17871,0.20005,0.10035,0.10091,0.10086,0.098469,0.099949,0.099  
909,0.098958,0.097919,0.10006,0.096006,0.097773,0.097668,0.097123,0.09  
5724,0.097619,0.097532,0.095903,0.094972,0.44369,0.45886,0.4478,0.4361  
9,0.43724,0.44095,0.23217,0.24898,0.26492,0.25289,0.31445,0.22735,0.19  
33,0.18322,0.20175,0.19689,0.18926,0.21344,0.20425,0.21176,0.099107,0.  
094383,0.098392,0.098492,0.10009,0.099149,0.096078,0.098012,0.09775,0.  
097687,0.097179,0.10281,0.098971,0.10108,0.096588,0.10321,0.098752,0.0  
92812,0.44779,0.43999,0.45279,0.42653,0.41047,0.26307,0.24859,0.27261,  
0.26669,0.29494,0.28112,0.17013,0.22706,0.21665,0.20519,0.21971,0.1961  
6,0.23879,0.21719,0.21131,0.10017,0.096049,0.093536,0.098142,0.093563,  
0.097583,0.098325,0.10058,0.09882,0.1032,0.098559,0.098345,0.09744,0.0  
90063,0.096303,0.090539,0.096094,0.095818,0.39869,0.42354,0.46917,0.25  
931,0.24691,0.23731,0.26074,0.25861,0.23145,0.26829,0.26555,0.21682,0.  
21885,0.21214,0.22646,0.21477,0.22009,0.20633,0.21044,0.22167,0.10162,  
0.099426,0.097935,0.10236,0.093893,0.099671,0.1007,0.10108,0.097476,0.  
10338,0.097462,0.094397,0.098153,0.098892,0.092035,0.093929,0.1005,0.1  
0209,0.42073,0.24375,0.26073,0.25976,0.26374,0.24013,0.25653,0.25335,0.  
.24331,0.25149,0.23711,0.21641,0.19043,0.219,0.19061,0.20094,0.1882,0.  
21094,0.2085,0.10162,0.093255,0.099474,0.099435,0.10332,0.09324,0.0960  
2,0.099952,0.10003,0.095578,0.094197,0.098104,0.10337,0.098373,0.09690  
5,0.098744,0.095937,0.075132,0.23724,0.27908,0.3087,0.25635,0.23421,0.  
24267,0.24724,0.24783,0.30405,0.25666,0.19977,0.22332,0.19319,0.22118,  
0.19378,0.20223,0.21232,0.20754,0.20976,0.096021,0.096473,0.097742,0.1  
0007,0.094928,0.099401,0.098163,0.097203,0.098279,0.093005,0.094386,0.  
097933,0.10146,0.10009,0.093466,0.10385,0.097076,0.079418,0.27908,0.23  
032,0.26873,0.24855,0.26512,0.24903,0.26503,0.24849,0.2782,0.25746,0.2  
0946,0.21666,0.21399,0.21132,0.21262,0.21373,0.20172,0.20481,0.097195,  
0.1065,0.099569,0.10001,0.096998,0.099149,0.099852,0.10057,0.10393,0.1  
0184,0.099849,0.095985,0.095869,0.097965,0.096403,0.10173,0.10023,0.10  
685,0.07665,0.2687,0.27517,0.24532,0.20998,0.27213,0.2529,0.24681,0.29

682,0.24226,0.24871,0.20432,0.22015,0.20051,0.22234,0.22381,0.21395,0.2254,0.2054,0.097388,0.097181,0.092083,0.099998,0.096127,0.093498,0.09808,0.099185,0.095956,0.099406,0.10002,0.098223,0.092917,0.097527,0.094977,0.099574,0.098413,0.075145,0.077853,0.075193,0.23261,0.25379,0.26846,0.24029,0.24262,0.36346,0.2965,0.28637,0.27084,0.2172,0.20128,0.2229,0.21542,0.22303,0.22062,0.098706,0.094571,0.096063,0.096004,0.09416,0.097172,0.093975,0.099119,0.093272,0.098003,0.098339,0.097368,0.09679,0.097964,0.09806,0.098129,0.10312,0.10638,0.07629,0.074798,0.078084,0.072497,0.24647,0.28249,0.23833,0.2507,0.24786,0.26669,0.23253,0.31963,0.25755,0.19853,0.19214,0.20248,0.1002,0.099159,0.095791,0.098017,0.094344,0.097043,0.10001,0.095736,0.099279,0.095536,0.094835,0.099103,0.092556,0.099381,0.093075,0.096032,0.097821,0.094781,0.096699,0.10065,0.074962,0.077156,0.075834,0.073917,0.075134,0.075997,0.2596,0.22991,0.24308,0.28825,0.25494,0.26623,0.27175,0.26448,0.096877,0.096844,0.099854,0.095732,0.099707,0.097363,0.094081,0.099325,0.10044,0.09165,0.10132,0.10142,0.099896,0.097989,0.099148,0.098292,0.093684,0.099703,0.098364,0.095422,0.098466,0.097759,0.096964,0.074706,0.074189,0.075639,0.074159,0.073979,0.07836,0.27947,0.20942,0.25235,0.24475,0.25667,0.074584,0.073422,0.10036,0.098476,0.096028,0.10176,0.097478,0.095161,0.099413,0.093471,0.095979,0.095427,0.097272,0.096092,0.098922,0.098572,0.10128,0.098218,0.095606,0.09689,0.098858,0.098268,0.099854,0.075107,0.075931,0.076182,0.07364,0.074013,0.07412,0.077998,0.078624,0.074385,0.077991,0.34842,0.29677,0.07376,0.077942,0.07584,0.074787,0.09241,0.098641,0.09935,0.096993,0.10166,0.097542,0.094957,0.09694,0.096626,0.094883,0.08283,0.096879,0.097195,0.09447,0.092689,0.10586,0.097885,0.096833,0.10101,0.074099,0.076372,0.076198,0.078614,0.075971,0.076062,0.077849,0.075469,0.076256,0.076126,0.073044,0.074107,0.074614,0.073762,0.070525,0.075898,0.077638,0.1,0.10025,0.097558,0.09519,0.090648,0.10538,0.1034,0.096305,0.097158,0.10171,0.098098,0.093913,0.099689,0.1071,0.099782,0.095496,0.075865,0.07686,0.076063,0.077074,0.072559,0.079572,0.077457,0.07389,0.072847,0.076838,0.076233,0.077525,0.074771,0.075812,0.073409,0.076669,0.075562,0.076676,0.075775,0.10017,0.099035,0.10203,0.099092,0.10089,0.10055,0.094026,0.10027,0.098935,0.096325,0.098335,0.0995,0.096849,0.074072,0.072901,0.076693,0.078524,0.073084,0.076233,0.072588,0.078183,0.076724,0.076305,0.076998,0.074442,0.076733,0.075964,0.074342,0.076368,0.076483,0.075637,0.073053,0.077202,0.077537,0.098165,0.094876,0.096703,0.10012,0.10491,0.093596,0.10783,0.088435,0.099532,0.080324,0.077451,0.076774,0.074284,0.076406,0.073366,0.073521,0.07506,0.075236,0.074524,0.07195,0.076715,0.076355,0.071122,0.074848,0.081557,0.074684,0.072906,0.074429,0.076277,0.073385,0.077382,0.073807,0.07888,0.07563,0.09782,0.098903,0.098573,0.096476,0.075358,0.076995,0.072523,0.07507,0.074124,0.078222,0.077433,0.076005,0.0754,0.072346,0.078143,0.07554,0.075449,0.075494,0.079282,0.075107,0.075891,0.077511,0.07526,0.07466,0.076041,0.075761,0.074396,0.074113,0.076938,0.074881,0.076225,0.072762,0.078208,0.076526,0.074295,0.07854,0.074887,0.076164,0.071082,0.079324,0.077045,0.075641,0.076303,0.078407,0.076541,0.072707,0.077525,0.076327,0.077224,0.074698,0.075813,0.073297,0.078655,0.078241,0.072867,0.078099,0.079768,0.078738,0.07731,0.0779,0.076306,0.076328,0.073572,0.07702,0.07463,0.074599,0.076531,0.072198,0.077135,0.075957,0.075762,0.077175,0.073613,0.076439,0.076626,0.074707,0.072456,0.076671,0.079047,0.074287,0.076034,0.074792,0.077006,0.073278,0.074616,0.076266,0.076187,0.073408,0.073455,0.073733,0.076533,0.077062,0.077372,0.07679

7,0.078602,0.074227,0.075115,0.073224,0.073822,0.074084,0.078386,0.075378,0.074836,0.077239,0.076742,0.079147,0.076925,0.074862,0.074672,0.076713,0.077955,0.075233,0.07862,0.076751,0.077386,0.07689,0.070142,0.07638,0.07609,0.076276,0.076176,0.074903,0.076624,0.075587,0.08081,0.077101,0.076362,0.075563,0.075523,0.074723,0.076429,0.075428,0.07651,0.074412,0.074285,0.077069,0.074448,0.075783,0.077457,0.076827,0.078023,0.080087,0.077645,0.075863,0.073594,0.07311,0.078583,0.076593,0.075525,0.07644,0.079257,0.071198,0.075394,0.077444,0.076821,0.073954,0.075366,0.079074,0.077315,0.075354,0.077945,0.076454,0.079215,0.078024,0.076295,0.074231,0.074415,0.074643,0.07419,0.075942,0.078039,0.073982,0.075784,0.077373,0.075038,0.07751,0.077544,0.077589,0.077304,0.075719,0.073794,0.074178,0.076242,0.075088,0.077261,0.076533,0.077297,0.078242,0.079273,0.074108,0.077482,0.077973,0.073746,0.074756,0.079211,0.074266,0.07743,0.075445,0.072325

0.10936,0.10884,0.11023,0.10896,0.11077,0.10874,0.11053,0.11126,0.10766,0.10928,0.11031,0.10846,0.10852,0.11012,0.10733,0.11005,0.10765,0.1091,0.10944,0.10972,0.23998,0.28477,0.23239,0.26452,0.10732,0.10907,0.11018,0.11252,0.11047,0.11241,0.10859,0.10664,0.11062,0.11073,0.11059,0.11066,0.11018,0.11115,0.10966,0.42893,0.28393,0.26122,0.27252,0.28509,0.27786,0.27234,0.10885,0.10971,0.10967,0.11027,0.10832,0.11093,0.10791,0.10683,0.10918,0.11202,0.11015,0.10886,0.10721,0.11126,0.10901,0.38339,0.37281,0.26302,0.25469,0.25859,0.28271,0.26828,0.23416,0.23058,0.27374,0.10914,0.10888,0.11265,0.10906,0.11072,0.11048,0.11139,0.11004,0.10982,0.1115,0.11036,0.10952,0.10837,0.11056,0.10866,0.3985,0.3693,0.44003,0.2718,0.2752,0.24192,0.23376,0.25649,0.24774,0.26864,0.22037,0.31166,0.10692,0.11184,0.10754,0.10813,0.1097,0.11032,0.10913,0.10975,0.1092,0.10905,0.10848,0.10809,0.11237,0.10792,0.10859,0.11337,0.43227,0.3983,0.4197,0.45216,0.23629,0.26158,0.26018,0.26612,0.26589,0.26385,0.24616,0.25172,0.25899,0.24464,0.11176,0.10997,0.10989,0.10916,0.10874,0.11169,0.11072,0.10797,0.10937,0.10707,0.10793,0.10938,0.11005,0.10992,0.10939,0.10991,0.41817,0.38007,0.38819,0.39892,0.37561,0.39638,0.26136,0.20153,0.2193,0.24399,0.23801,0.28777,0.25909,0.23184,0.21219,0.27551,0.10921,0.10664,0.10727,0.11224,0.11163,0.10913,0.10859,0.10887,0.11091,0.11103,0.11065,0.10664,0.10848,0.11043,0.11099,0.11108,0.10968,0.37765,0.39419,0.3901,0.38829,0.43579,0.37215,0.26184,0.28186,0.27349,0.27911,0.25834,0.28848,0.26829,0.25967,0.31902,0.24659,0.25948,0.10945,0.10983,0.10923,0.11244,0.11174,0.10837,0.10791,0.10859,0.11093,0.11589,0.11174,0.10971,0.11013,0.087129,0.088457,0.089688,0.10973,0.38433,0.41213,0.42311,0.38688,0.42522,0.40811,0.40737,0.22924,0.26333,0.2784,0.24964,0.25701,0.26714,0.27077,0.27795,0.29134,0.26287,0.25274,0.11059,0.11183,0.10698,0.10819,0.10981,0.10792,0.10878,0.10764,0.10778,0.10984,0.11167,0.090265,0.089968,0.08565,0.09616,0.088266,0.083724,0.10797,0.41193,0.39678,0.40729,0.41465,0.40439,0.38975,0.41903,0.24643,0.22174,0.26478,0.25464,0.24849,0.30911,0.2188,0.24209,0.29326,0.27442,0.25323,0.11059,0.10895,0.10899,0.10923,0.10891,0.10857,0.11044,0.1076,0.10784,0.087502,0.090632,0.087349,0.088746,0.089416,0.086631,0.090746,0.088094,0.084634,0.10935,0.40648,0.39084,0.39721,0.41007,0.36458,0.43513,0.45263,0.266,0.24284,0.24826,0.28107,0.25409,0.26351,0.25847,0.25561,0.28498,0.26078,0.27059,0.2596,0.1097,0.11013,0.1125,0.11068,0.11038,0.11219,0.080754,0.086101,0.088932,0.091029,0.091179,0.084652,0.090442,0.089028,0.090176,0.09534,0.090143,0.087523,0.38068,0.41451,0.41409,0.40318,0.4148,0.41156,0.42055,0.24922,0.2496,0.25017,0.27743

,0.29664,0.25415,0.24353,0.25793,0.2806,0.27075,0.20061,0.26256,0.1099  
3,0.10797,0.1143,0.093183,0.090592,0.088207,0.09149,0.094182,0.087427,  
0.092391,0.088949,0.087981,0.092967,0.090837,0.088445,0.091131,0.08699  
4,0.089151,0.41907,0.3854,0.42619,0.38894,0.41935,0.41811,0.40668,0.38  
365,0.40991,0.26624,0.28023,0.25025,0.27918,0.26275,0.22667,0.30193,0.  
27024,0.25513,0.24768,0.25712,0.090789,0.086133,0.08835,0.089408,0.090  
768,0.088868,0.090627,0.087244,0.08527,0.094157,0.089911,0.087408,0.08  
7201,0.091946,0.087602,0.090636,0.08746,0.085051,0.41664,0.43351,0.371  
35,0.42299,0.41475,0.41129,0.44321,0.43841,0.3962,0.25321,0.24545,0.18  
95,0.19749,0.2008,0.17466,0.20245,0.18134,0.19653,0.18683,0.20041,0.08  
9827,0.084834,0.089324,0.087966,0.090874,0.086839,0.084569,0.079352,0.  
089517,0.08949,0.096999,0.089119,0.088755,0.09459,0.090016,0.088965,0.  
078189,0.09217,0.42291,0.38818,0.42673,0.43276,0.40825,0.41432,0.42399  
,0.41255,0.38817,0.2229,0.20324,0.19824,0.2441,0.22663,0.19427,0.19087  
,0.17048,0.1781,0.19371,0.23563,0.087959,0.089556,0.091124,0.086257,0.  
091071,0.088489,0.090255,0.093924,0.090651,0.090599,0.087337,0.090925,  
0.092691,0.086124,0.095327,0.084738,0.090358,0.085903,0.41122,0.4135,0.  
.37112,0.42428,0.43375,0.41166,0.42455,0.19238,0.27959,0.26587,0.20518  
,0.17816,0.19308,0.20634,0.21712,0.20748,0.21019,0.14891,0.16594,0.182  
85,0.091414,0.091838,0.091758,0.088671,0.091634,0.091844,0.089582,0.08  
7563,0.09153,0.086971,0.088727,0.089052,0.087904,0.086414,0.088702,0.0  
89183,0.087512,0.085836,0.41069,0.43047,0.42617,0.40377,0.40418,0.4012  
2,0.2122,0.2266,0.23181,0.23722,0.29138,0.21646,0.18267,0.17081,0.1859  
3,0.18348,0.17281,0.19813,0.18637,0.19533,0.09129,0.086846,0.089991,0.  
088732,0.092542,0.08982,0.087799,0.088914,0.089567,0.088896,0.08833,0.  
093013,0.09012,0.091995,0.087378,0.093481,0.09015,0.082838,0.43134,0.4  
0665,0.43019,0.39864,0.37971,0.24024,0.22936,0.25751,0.24511,0.26987,0.  
.26195,0.15766,0.21043,0.19997,0.19274,0.2034,0.1806,0.21792,0.20108,0.  
.19617,0.090664,0.08734,0.084305,0.088318,0.083662,0.08952,0.089423,0.  
091414,0.089952,0.094805,0.090412,0.088265,0.088374,0.08179,0.086114,0.  
.08153,0.088358,0.086995,0.37502,0.39566,0.42655,0.23992,0.23426,0.210  
21,0.24734,0.23786,0.22096,0.24696,0.2485,0.19885,0.2031,0.19914,0.207  
71,0.20294,0.20157,0.19098,0.19564,0.20528,0.092708,0.091074,0.08791,0.  
.092444,0.084845,0.090007,0.09164,0.092417,0.088783,0.093772,0.088221,  
0.085018,0.089468,0.090153,0.083398,0.085909,0.092244,0.093182,0.39689  
,0.22041,0.24682,0.2456,0.24786,0.2246,0.23997,0.23985,0.22764,0.23801  
,0.22414,0.20013,0.17508,0.20271,0.17455,0.19217,0.18044,0.19598,0.192  
92,0.093137,0.083925,0.092143,0.090059,0.094259,0.08329,0.086014,0.090  
085,0.09072,0.087336,0.085144,0.090015,0.095144,0.089478,0.088163,0.08  
88,0.088144,0.068177,0.22068,0.27035,0.28812,0.23365,0.22512,0.23611,0.  
.22136,0.23255,0.2897,0.24254,0.1832,0.20413,0.17731,0.20768,0.18462,0.  
.18719,0.19429,0.19963,0.20302,0.088056,0.087874,0.088047,0.089534,0.0  
86352,0.090719,0.089748,0.089096,0.090593,0.084929,0.086231,0.090276,0.  
.092766,0.090557,0.084081,0.093852,0.087397,0.071334,0.26348,0.21939,0.  
.25186,0.22912,0.24695,0.23661,0.24445,0.23382,0.25472,0.24309,0.19183  
,0.19898,0.20359,0.20058,0.19913,0.19476,0.18873,0.19307,0.088494,0.09  
6712,0.091673,0.090937,0.088923,0.090769,0.089975,0.089664,0.093975,0.  
092967,0.090535,0.08669,0.086814,0.089131,0.087121,0.093503,0.09157,0.  
09753,0.068989,0.25037,0.26092,0.22908,0.18669,0.25984,0.23858,0.23245  
,0.2756,0.22053,0.22924,0.19183,0.20232,0.18995,0.20956,0.21047,0.1946  
3,0.21363,0.19256,0.090399,0.08785,0.083969,0.089441,0.086921,0.084391  
,0.089369,0.090131,0.086137,0.090134,0.091021,0.090318,0.08574,0.08979

6,0.086419,0.090136,0.089314,0.068741,0.071869,0.068158,0.22479,0.2427  
1,0.24862,0.23003,0.23204,0.35785,0.27736,0.27078,0.24901,0.20611,0.18  
372,0.20398,0.19675,0.21198,0.20527,0.090707,0.086806,0.086873,0.08771  
5,0.085561,0.08818,0.084742,0.090845,0.083871,0.090032,0.089066,0.0894  
34,0.088404,0.086587,0.089301,0.088673,0.093731,0.096639,0.06948,0.068  
208,0.070018,0.06608,0.23308,0.26273,0.21698,0.23053,0.22553,0.25494,0  
.22061,0.29948,0.2285,0.17838,0.1775,0.19158,0.090727,0.090588,0.08624  
1,0.088354,0.084771,0.089037,0.090937,0.087605,0.089373,0.087366,0.085  
2,0.090206,0.084028,0.090264,0.084321,0.087367,0.088709,0.086874,0.087  
781,0.091154,0.067826,0.070486,0.070279,0.067369,0.067345,0.068461,0.2  
476,0.21813,0.23116,0.27815,0.24054,0.2481,0.2478,0.24972,0.088914,0.0  
87994,0.089942,0.086652,0.090112,0.087956,0.084872,0.090045,0.092019,0  
.083684,0.090936,0.09117,0.090193,0.088086,0.089265,0.088504,0.08469,0  
.09026,0.089606,0.084779,0.089031,0.088688,0.088381,0.066705,0.067354,  
0.069497,0.067778,0.066187,0.072112,0.25867,0.20164,0.23301,0.22688,0.  
24185,0.067332,0.066671,0.091909,0.090188,0.088326,0.093349,0.089075,0  
.08692,0.089964,0.085949,0.086767,0.086605,0.087796,0.087641,0.089827,  
0.089927,0.093297,0.088805,0.086737,0.088284,0.090216,0.088964,0.09143  
4,0.06685,0.06784,0.069723,0.066649,0.067733,0.066382,0.069576,0.07017  
2,0.06667,0.070382,0.32188,0.28804,0.066508,0.071178,0.068857,0.067105  
,0.084723,0.090198,0.090644,0.087347,0.092615,0.088077,0.086308,0.0889  
56,0.087458,0.087345,0.073639,0.088133,0.087292,0.085803,0.083794,0.09  
6434,0.089016,0.089783,0.09191,0.06745,0.069602,0.069135,0.07179,0.069  
794,0.068131,0.070562,0.066423,0.068237,0.069301,0.067402,0.067704,0.0  
67969,0.066646,0.063759,0.068961,0.069414,0.090377,0.091384,0.089651,0  
.086581,0.081942,0.096117,0.094429,0.086426,0.090344,0.09212,0.089927,  
0.084884,0.090562,0.098431,0.09013,0.086909,0.069943,0.068432,0.069646  
,0.070532,0.06577,0.072287,0.070354,0.06848,0.066604,0.070216,0.067403  
,0.069691,0.067234,0.067119,0.067436,0.068805,0.067299,0.069734,0.0674  
44,0.091184,0.090133,0.092748,0.09014,0.091804,0.091726,0.085104,0.091  
549,0.089369,0.086787,0.089801,0.090229,0.088639,0.067551,0.066082,0.0  
69342,0.071451,0.065651,0.068819,0.065097,0.070571,0.070156,0.068507,0  
.069026,0.067788,0.068684,0.068642,0.068475,0.070741,0.070585,0.068402  
,0.065881,0.068111,0.070952,0.088382,0.087399,0.088224,0.091218,0.0953  
33,0.083611,0.097022,0.080332,0.090191,0.072428,0.069651,0.069378,0.06  
7515,0.069989,0.067293,0.066062,0.06831,0.068327,0.068148,0.065546,0.0  
68307,0.06977,0.064404,0.068625,0.074357,0.068214,0.065498,0.067661,0.  
069751,0.066654,0.069508,0.065871,0.071885,0.06857,0.087601,0.089441,0  
.089083,0.086997,0.067937,0.070545,0.065125,0.067945,0.067973,0.069506  
,0.069964,0.069534,0.06724,0.065875,0.071016,0.067586,0.067237,0.06763  
3,0.072968,0.068103,0.068845,0.070117,0.067709,0.067758,0.067358,0.066  
484,0.068584,0.06794,0.069587,0.067137,0.068636,0.06652,0.070634,0.069  
146,0.066165,0.070857,0.068919,0.068408,0.06287,0.071339,0.070184,0.06  
7829,0.068451,0.07076,0.06861,0.064627,0.06972,0.067786,0.069087,0.067  
199,0.066974,0.066249,0.071797,0.071973,0.064948,0.071447,0.07272,0.07  
1733,0.069724,0.069744,0.068866,0.069364,0.066649,0.069046,0.06689,0.0  
6952,0.070099,0.065107,0.070819,0.06792,0.068594,0.069139,0.066912,0.0  
70339,0.068252,0.06725,0.067109,0.068441,0.070902,0.066353,0.069002,0.  
067307,0.069086,0.066083,0.067702,0.068235,0.067525,0.065968,0.065235,  
0.066598,0.068883,0.070474,0.06933,0.069195,0.070259,0.067638,0.067364  
,0.067397,0.067208,0.067153,0.069455,0.06974,0.068563,0.069878,0.06880  
4,0.071965,0.069914,0.067722,0.067087,0.069217,0.070198,0.069874,0.071

311,0.068124,0.070004,0.070413,0.062591,0.068997,0.068144,0.068957,0.068598,0.066985,0.069652,0.068551,0.073977,0.070142,0.068195,0.0668,0.068526,0.067661,0.068646,0.069261,0.070155,0.067767,0.066652,0.070063,0.066192,0.069165,0.069599,0.06978,0.070557,0.072639,0.069029,0.068117,0.065134,0.065289,0.071959,0.070219,0.067166,0.068651,0.070975,0.062764,0.067472,0.069776,0.069388,0.068272,0.068394,0.071248,0.069572,0.068455,0.07042,0.068988,0.072709,0.070024,0.067199,0.066544,0.066588,0.067225,0.066219,0.06885,0.070373,0.068503,0.067422,0.069842,0.067682,0.070414,0.069783,0.070014,0.070542,0.067708,0.065412,0.066599,0.068526,0.068665,0.069983,0.069257,0.070049,0.070415,0.073495,0.067196,0.070047,0.070488,0.067348,0.066437,0.071481,0.066434,0.071815,0.06843,0.066386

0.1011,0.10072,0.10165,0.10107,0.10338,0.099683,0.10093,0.10133,0.10029,0.1007,0.10197,0.10024,0.099611,0.10084,0.098718,0.10079,0.099236,0.099692,0.10124,0.10063,0.22488,0.27093,0.22411,0.25748,0.099259,0.099783,0.10167,0.10353,0.10195,0.1032,0.10009,0.098988,0.10211,0.1025,0.10005,0.10214,0.10165,0.10266,0.10046,0.40453,0.26974,0.25291,0.25598,0.27754,0.26305,0.25626,0.10046,0.10051,0.10165,0.10053,0.099349,0.10304,0.099012,0.096909,0.10067,0.10247,0.10117,0.10064,0.099318,0.10303,0.10042,0.36363,0.35252,0.24295,0.25205,0.24082,0.27246,0.25777,0.21936,0.21782,0.25865,0.10089,0.1003,0.1031,0.10038,0.10256,0.10134,0.10283,0.1008,0.10148,0.10147,0.10165,0.10073,0.10009,0.10065,0.099902,0.38613,0.36091,0.42501,0.25575,0.2631,0.23122,0.21945,0.23916,0.23473,0.25757,0.20642,0.29864,0.098695,0.10247,0.09904,0.099439,0.1006,0.099939,0.10132,0.10182,0.10004,0.099555,0.10071,0.099092,0.10337,0.097365,0.099608,0.10505,0.40771,0.38021,0.39459,0.44291,0.22527,0.25473,0.25135,0.25253,0.25676,0.25493,0.23608,0.24462,0.23384,0.22839,0.1029,0.10173,0.10122,0.099375,0.10046,0.1027,0.10249,0.099892,0.10028,0.097906,0.098482,0.10032,0.10137,0.10175,0.10142,0.10048,0.41145,0.35861,0.36458,0.37643,0.35423,0.35826,0.25181,0.19247,0.20965,0.23721,0.23011,0.27749,0.24894,0.2205,0.20083,0.26261,0.10105,0.097762,0.099314,0.10434,0.10355,0.10018,0.099584,0.099778,0.10267,0.10332,0.10238,0.098528,0.09849,0.10186,0.10121,0.10336,0.10119,0.36264,0.38881,0.38322,0.3735,0.41951,0.35243,0.24656,0.26812,0.25994,0.2661,0.24914,0.27002,0.24822,0.24779,0.29709,0.23509,0.24779,0.098669,0.10141,0.099984,0.10318,0.10346,0.10039,0.098936,0.10014,0.10196,0.1075,0.10377,0.10102,0.10195,0.079358,0.082408,0.082688,0.10202,0.3612,0.40571,0.394,0.37457,0.4052,0.39787,0.38737,0.21995,0.24612,0.25797,0.23221,0.24239,0.25681,0.25828,0.26964,0.28387,0.24381,0.23784,0.10132,0.10349,0.09956,0.099799,0.10134,0.099014,0.10067,0.098399,0.099265,0.10259,0.10257,0.082551,0.081917,0.077982,0.088382,0.082106,0.076132,0.099368,0.38871,0.38357,0.387,0.40644,0.38721,0.36755,0.3992,0.23219,0.20813,0.25671,0.24177,0.24232,0.28776,0.20922,0.22767,0.27475,0.25583,0.2372,0.10196,0.10053,0.09965,0.10144,0.10162,0.10007,0.10153,0.099396,0.099232,0.080366,0.084004,0.079206,0.082732,0.082882,0.080673,0.083873,0.081276,0.078082,0.10058,0.38372,0.36444,0.37868,0.38001,0.36053,0.41205,0.41705,0.25534,0.23904,0.24085,0.27417,0.24577,0.24912,0.24925,0.2385,0.27647,0.25131,0.25996,0.24304,0.10027,0.10156,0.10366,0.10196,0.10102,0.10409,0.073881,0.080101,0.081835,0.084322,0.084697,0.078743,0.084337,0.081691,0.083547,0.087533,0.083747,0.080331,0.36541,0.39743,0.40156,0.39365,0.39721,0.39094,0.40474,0.2362,0.23778,0.23421,0.26665,0.28276,0.24019,0.23613,0.24289,0.26159,0.25733,0.19069,0.25262,0.10092,0.09931,0.10628,0.085687,0.0

84114,0.082099,0.084347,0.087529,0.0802,0.0855,0.083727,0.08184,0.0858  
82,0.084854,0.082486,0.085423,0.080031,0.082303,0.40177,0.35464,0.4093  
1,0.36082,0.39863,0.40733,0.3928,0.37258,0.3998,0.25461,0.27775,0.2356  
6,0.26384,0.24712,0.2172,0.29349,0.25572,0.24771,0.23369,0.23975,0.084  
503,0.079423,0.08172,0.082199,0.084146,0.082071,0.083107,0.080948,0.07  
8466,0.088026,0.082972,0.080979,0.080646,0.086374,0.080807,0.082965,0.  
078215,0.077806,0.4013,0.41417,0.35915,0.39842,0.38623,0.40137,0.41705  
,0.39939,0.39001,0.24249,0.23341,0.18099,0.18733,0.19197,0.16512,0.190  
63,0.17165,0.1887,0.18036,0.18804,0.08316,0.078768,0.081745,0.082048,0.  
.08488,0.080619,0.07803,0.073904,0.081802,0.083478,0.090747,0.082913,0.  
.082782,0.08731,0.083962,0.082091,0.072212,0.085994,0.40894,0.36493,0.  
4191,0.42826,0.39702,0.40932,0.414,0.38739,0.3823,0.21758,0.19025,0.18  
87,0.23048,0.21898,0.18316,0.18318,0.16497,0.17037,0.18336,0.22056,0.0  
82259,0.082665,0.085306,0.080448,0.083279,0.081547,0.08259,0.086705,0.  
083747,0.083806,0.080044,0.083966,0.08589,0.080606,0.087226,0.078961,0.  
.083419,0.078424,0.40451,0.39365,0.35897,0.40695,0.42008,0.40233,0.405  
69,0.1821,0.26687,0.26267,0.19824,0.16632,0.17878,0.20015,0.211,0.1973  
2,0.197,0.13746,0.15896,0.18115,0.085175,0.084464,0.08382,0.082728,0.0  
83712,0.083791,0.081733,0.081772,0.08466,0.081115,0.082462,0.081178,0.  
081198,0.080038,0.083809,0.082696,0.080704,0.079411,0.38923,0.41645,0.  
42233,0.3816,0.38269,0.38824,0.20028,0.21342,0.2205,0.22194,0.28328,0.  
20216,0.1775,0.16047,0.17588,0.17291,0.16244,0.18527,0.1821,0.18455,0.  
084052,0.080758,0.083022,0.082012,0.085987,0.083207,0.081636,0.081966,  
0.082597,0.082426,0.081413,0.085493,0.08278,0.086668,0.079684,0.085763  
,0.08183,0.076704,0.41545,0.39102,0.41594,0.37204,0.35445,0.2215,0.219  
44,0.24902,0.23992,0.2608,0.25126,0.15048,0.19863,0.18921,0.18138,0.19  
693,0.17204,0.20883,0.18936,0.18627,0.084105,0.080933,0.077942,0.08140  
1,0.076339,0.082108,0.082632,0.085011,0.0821,0.086952,0.082739,0.08244  
2,0.081384,0.075168,0.079762,0.076112,0.08184,0.08058,0.35511,0.39424,  
0.41654,0.23128,0.21377,0.20817,0.23335,0.22695,0.21489,0.23975,0.2357  
8,0.1878,0.19408,0.19144,0.18847,0.18991,0.19028,0.18273,0.1863,0.1976  
1,0.08442,0.084302,0.080567,0.08467,0.07853,0.084043,0.085188,0.084724  
,0.080796,0.086943,0.082032,0.077929,0.083174,0.085625,0.077073,0.0798  
06,0.08465,0.085045,0.36799,0.20268,0.23008,0.23454,0.24166,0.21371,0.  
22939,0.22881,0.2198,0.22169,0.21149,0.18655,0.16789,0.1954,0.17034,0.  
18594,0.17169,0.18826,0.18204,0.086305,0.077404,0.08446,0.084009,0.087  
431,0.077128,0.078865,0.083217,0.08339,0.082191,0.079986,0.083275,0.08  
8331,0.083091,0.081529,0.082429,0.081168,0.062335,0.21155,0.25998,0.27  
794,0.22252,0.21079,0.23039,0.21117,0.22414,0.27812,0.23299,0.17364,0.  
1965,0.16878,0.19676,0.17013,0.18066,0.17733,0.19185,0.18763,0.080152,  
0.081738,0.080228,0.082432,0.07949,0.084841,0.083559,0.081577,0.084172  
,0.077958,0.080596,0.084449,0.086779,0.083456,0.078045,0.087341,0.0814  
69,0.06652,0.24225,0.21468,0.23194,0.21736,0.23648,0.21547,0.22944,0.2  
2704,0.23455,0.2492,0.17927,0.18937,0.18775,0.18851,0.18521,0.18107,0.  
1814,0.17821,0.081714,0.08911,0.085215,0.084468,0.082189,0.082966,0.08  
4631,0.08286,0.086229,0.085719,0.083274,0.079903,0.081357,0.082404,0.0  
82143,0.086314,0.084672,0.090193,0.064261,0.24301,0.24532,0.21974,0.18  
126,0.24628,0.2233,0.23025,0.26517,0.21034,0.21623,0.18486,0.19537,0.1  
8121,0.19779,0.2057,0.19085,0.20386,0.1851,0.083375,0.07967,0.078055,0  
.08212,0.080321,0.077865,0.082323,0.08356,0.079207,0.083989,0.084251,0  
.081641,0.080435,0.083704,0.08032,0.08457,0.081746,0.065134,0.066317,0  
.063716,0.21578,0.23492,0.23121,0.22024,0.22591,0.34742,0.25854,0.2559

6,0.23742,0.19788,0.17298,0.19076,0.18979,0.20672,0.19472,0.083611,0.0  
81694,0.081242,0.082105,0.0785,0.08159,0.07917,0.084012,0.077441,0.083  
042,0.082578,0.082819,0.081462,0.079287,0.083311,0.082367,0.085493,0.0  
89362,0.064827,0.064139,0.065048,0.059989,0.22171,0.24581,0.2089,0.222  
42,0.21778,0.24439,0.20808,0.28379,0.21933,0.16943,0.169,0.18079,0.083  
196,0.084857,0.080122,0.081595,0.078901,0.081062,0.083915,0.081021,0.0  
8298,0.081002,0.078834,0.083116,0.077728,0.082988,0.077866,0.080286,0.  
082077,0.080135,0.081484,0.083938,0.063896,0.06697,0.065825,0.062639,0.  
.062272,0.06488,0.23515,0.20589,0.22088,0.26603,0.21923,0.24159,0.2431  
1,0.23914,0.081893,0.082338,0.083852,0.080835,0.082737,0.081517,0.0794  
41,0.083332,0.085373,0.077265,0.085479,0.083949,0.082677,0.080805,0.08  
358,0.080683,0.077798,0.083994,0.082598,0.077881,0.081716,0.081412,0.0  
81755,0.061892,0.063552,0.066216,0.063644,0.062825,0.068023,0.24375,0.  
18943,0.2177,0.20146,0.22615,0.062365,0.061937,0.086159,0.084157,0.081  
151,0.086414,0.081825,0.080657,0.082336,0.080176,0.08071,0.078674,0.08  
1363,0.08079,0.081358,0.081573,0.085511,0.081438,0.081517,0.081269,0.0  
83841,0.081936,0.084094,0.062525,0.063525,0.064327,0.062606,0.063392,0.  
.061743,0.063548,0.065124,0.061684,0.065645,0.30632,0.2834,0.061753,0.  
066462,0.064279,0.062767,0.077793,0.082884,0.082947,0.080367,0.086248,  
0.080833,0.080533,0.082891,0.080946,0.080254,0.067643,0.080085,0.07949  
8,0.080493,0.077767,0.088924,0.081595,0.083225,0.085443,0.062255,0.064  
081,0.062873,0.06639,0.067311,0.063674,0.066553,0.061838,0.063247,0.06  
3335,0.063897,0.061678,0.062383,0.060952,0.059742,0.062931,0.063951,0.  
08416,0.085725,0.083036,0.080045,0.075712,0.089263,0.087212,0.07965,0.  
082496,0.085399,0.081674,0.078632,0.084559,0.090074,0.084073,0.079028,  
0.065073,0.063558,0.065311,0.065808,0.060806,0.066579,0.065206,0.06356  
2,0.061383,0.064875,0.063611,0.064797,0.062769,0.062341,0.062176,0.064  
385,0.063025,0.063375,0.063493,0.084311,0.083841,0.08442,0.08332,0.083  
982,0.083995,0.079387,0.084066,0.082572,0.080795,0.081502,0.08369,0.08  
0609,0.062792,0.06102,0.064382,0.0669,0.061743,0.064296,0.060179,0.066  
327,0.065742,0.065004,0.06295,0.062798,0.063381,0.064626,0.063228,0.06  
5097,0.066273,0.063177,0.061475,0.06438,0.064427,0.079884,0.080964,0.0  
82265,0.085103,0.08789,0.078671,0.089596,0.074319,0.083583,0.066693,0.  
065607,0.063727,0.062576,0.064611,0.06293,0.062308,0.06397,0.063869,0.  
062654,0.061238,0.06285,0.064955,0.059781,0.062782,0.069702,0.063459,0.  
.060943,0.063166,0.065835,0.061869,0.06382,0.061107,0.06649,0.064079,0.  
.081911,0.083363,0.081714,0.079966,0.062452,0.064644,0.061359,0.063507  
,0.063959,0.064586,0.065058,0.064131,0.063152,0.061826,0.065036,0.0637  
61,0.062901,0.062086,0.064806,0.063855,0.064015,0.065681,0.061741,0.06  
3191,0.062959,0.061145,0.064299,0.063247,0.065515,0.064065,0.064027,0.  
062159,0.066136,0.064919,0.062788,0.066154,0.0649,0.063975,0.058706,0.  
06703,0.065298,0.063586,0.064931,0.065051,0.064771,0.059917,0.065238,0.  
.063779,0.064767,0.063948,0.062621,0.060721,0.066865,0.066646,0.060294  
,0.066833,0.067437,0.067777,0.065383,0.065544,0.06185,0.063877,0.06197  
7,0.065302,0.061044,0.064037,0.064976,0.060619,0.065972,0.063687,0.064  
437,0.063653,0.062997,0.064373,0.064627,0.061592,0.062676,0.064483,0.0  
65487,0.061217,0.064061,0.062756,0.064856,0.060291,0.065662,0.061999,0.  
.064239,0.060566,0.061308,0.063183,0.064153,0.065649,0.063141,0.064669  
,0.065405,0.063896,0.061907,0.061897,0.062036,0.06367,0.063134,0.06455  
2,0.064573,0.066058,0.063928,0.066238,0.064414,0.062375,0.062943,0.063  
75,0.065738,0.065863,0.066043,0.064126,0.066359,0.064477,0.057799,0.06  
2323,0.064475,0.063928,0.064478,0.063342,0.065128,0.065809,0.068953,0.



0.065129,0.063633,0.061897,0.06335,0.063924,0.063798,0.065097,0.064353,0.063728,0.063435,0.065695,0.061784,0.064885,0.063194,0.064368,0.065597,0.068176,0.065378,0.063093,0.061364,0.060506,0.066186,0.065818,0.062989,0.063595,0.06535,0.059292,0.062466,0.066318,0.064144,0.065025,0.064262,0.065824,0.065521,0.064522,0.065763,0.065368,0.066655,0.064962,0.061779,0.060788,0.062813,0.062293,0.062068,0.064917,0.065431,0.063467,0.063027,0.065912,0.062864,0.066266,0.064376,0.065779,0.065069,0.062729,0.062128,0.062383,0.064211,0.06322,0.065399,0.065835,0.065253,0.065903,0.06841,0.062203,0.065692,0.065162,0.063602,0.062289,0.066134,0.061866,0.066795,0.063704,0.062859

0.094142,0.093563,0.094318,0.093158,0.096989,0.092102,0.093996,0.093254,0.093395,0.092999,0.094186,0.09239,0.091833,0.094683,0.091269,0.093925,0.092069,0.093096,0.094285,0.093865,0.2155,0.25573,0.21715,0.24855,0.090996,0.092993,0.094627,0.096908,0.095712,0.095195,0.094025,0.092308,0.094081,0.095478,0.091978,0.094835,0.094497,0.095675,0.092944,0.38882,0.25926,0.23935,0.2496,0.26864,0.25485,0.25167,0.092706,0.094297,0.093636,0.092474,0.093028,0.095679,0.091272,0.090629,0.09331,0.095169,0.094875,0.094224,0.093159,0.09478,0.092664,0.35503,0.35688,0.23497,0.23858,0.23239,0.25827,0.25527,0.21189,0.20855,0.24909,0.093649,0.091909,0.095231,0.093033,0.094467,0.095272,0.095225,0.093832,0.094127,0.094001,0.094139,0.092747,0.093585,0.094031,0.092733,0.37175,0.35051,0.4133,0.24804,0.25133,0.22416,0.20325,0.23037,0.22961,0.25362,0.19736,0.28126,0.09132,0.094449,0.091598,0.092854,0.093516,0.093171,0.094667,0.09511,0.092751,0.092905,0.093487,0.092296,0.096213,0.090817,0.092523,0.098201,0.39711,0.3591,0.4018,0.4329,0.21513,0.24221,0.23857,0.25168,0.2502,0.24349,0.22784,0.2332,0.22585,0.22229,0.095938,0.094368,0.09415,0.092985,0.094157,0.095059,0.094782,0.093099,0.094182,0.091618,0.092126,0.093165,0.092684,0.093699,0.09464,0.092803,0.4034,0.33911,0.3443,0.36076,0.34808,0.35858,0.24424,0.1803,0.20327,0.22195,0.23065,0.26198,0.24434,0.21257,0.19011,0.26129,0.094569,0.091078,0.092345,0.097323,0.095392,0.093533,0.092232,0.09387,0.095093,0.095537,0.095247,0.091105,0.091728,0.094414,0.094096,0.095869,0.094903,0.361,0.38551,0.37833,0.37636,0.40353,0.35682,0.24082,0.25507,0.2437,0.26177,0.24111,0.26823,0.24545,0.22812,0.2755,0.22554,0.23852,0.090676,0.094112,0.092908,0.095988,0.096237,0.093271,0.091372,0.093312,0.094704,0.099594,0.09635,0.09251,0.095249,0.073832,0.078009,0.077816,0.093781,0.34997,0.41033,0.38179,0.36244,0.38349,0.38769,0.37955,0.2118,0.23989,0.25461,0.22655,0.23663,0.25134,0.25952,0.26402,0.28362,0.23235,0.22598,0.093063,0.095413,0.092585,0.092466,0.093424,0.091716,0.092845,0.090262,0.092103,0.094216,0.0954,0.076738,0.076985,0.072986,0.082322,0.079037,0.070352,0.09204,0.37583,0.36816,0.3746,0.3891,0.38138,0.34858,0.39207,0.22056,0.19465,0.25097,0.23119,0.23417,0.28437,0.20037,0.21992,0.26992,0.25168,0.22475,0.094667,0.094408,0.091924,0.092741,0.095491,0.093117,0.095574,0.091885,0.092975,0.07498,0.078399,0.073613,0.077342,0.077565,0.076119,0.079384,0.075656,0.073396,0.093456,0.36931,0.35335,0.37651,0.36979,0.34794,0.38783,0.40619,0.24453,0.2293,0.23791,0.26661,0.23837,0.23888,0.23977,0.23293,0.26849,0.24248,0.25406,0.23121,0.092855,0.0943,0.096342,0.094179,0.093901,0.096784,0.069113,0.075616,0.077251,0.078894,0.079687,0.073673,0.079208,0.076368,0.077126,0.081557,0.078086,0.075449,0.34453,0.38115,0.39408,0.38879,0.39243,0.37913,0.39854,0.2268,0.22512,0.2305,0.25954,0.27655,0.23166,0.22658,0.23088,0.24688,0.24429,0.18219,0.24542,0.093303,0.092668,0.097967,0.080157,0.077645,0.077672,0.07854,0.081975,

0.076296,0.080344,0.077929,0.075948,0.080057,0.080125,0.077153,0.08080  
1,0.075495,0.077113,0.39933,0.34942,0.39784,0.34934,0.3874,0.39711,0.3  
6971,0.37008,0.38496,0.24078,0.26827,0.22354,0.25164,0.23946,0.21293,0  
.278,0.26011,0.24256,0.21994,0.23773,0.079523,0.074427,0.077103,0.0777  
03,0.079799,0.078079,0.07823,0.076434,0.073021,0.081729,0.077726,0.075  
668,0.075354,0.080695,0.075511,0.076603,0.074177,0.072577,0.38581,0.38  
888,0.34964,0.38115,0.38441,0.38833,0.3983,0.36838,0.38655,0.23226,0.2  
2015,0.17678,0.18677,0.1775,0.16015,0.1911,0.16614,0.17878,0.17222,0.1  
8267,0.077257,0.073104,0.075986,0.077158,0.079804,0.075721,0.072714,0.  
069115,0.076138,0.079301,0.084382,0.078154,0.077276,0.081744,0.078017,  
0.077455,0.067854,0.079701,0.39814,0.3548,0.39708,0.4122,0.38023,0.403  
87,0.41297,0.37357,0.36225,0.21257,0.18561,0.17811,0.22015,0.20751,0.1  
6931,0.18245,0.15809,0.16475,0.17916,0.21274,0.078479,0.077126,0.08003  
2,0.075101,0.077882,0.078814,0.07704,0.079785,0.078773,0.079569,0.0757  
38,0.078489,0.079851,0.074472,0.081336,0.074037,0.079399,0.073184,0.40  
434,0.37576,0.34976,0.38634,0.39959,0.39169,0.38719,0.17453,0.25649,0.  
25419,0.1907,0.15909,0.17485,0.18906,0.20207,0.19148,0.18508,0.1325,0.  
14853,0.17833,0.078706,0.078339,0.078568,0.077354,0.078864,0.078296,0.  
075649,0.077459,0.077749,0.076759,0.077199,0.077673,0.076071,0.075289,  
0.077114,0.078373,0.075076,0.074735,0.3843,0.39613,0.40832,0.37302,0.3  
814,0.36819,0.20238,0.21205,0.21793,0.2088,0.27573,0.19611,0.17304,0.1  
5533,0.17468,0.16621,0.15644,0.17835,0.17727,0.17875,0.077877,0.07529,  
0.078209,0.077598,0.081464,0.077633,0.076376,0.077685,0.07837,0.076649  
,0.077374,0.079779,0.078345,0.081407,0.075199,0.080303,0.076991,0.0729  
59,0.39099,0.3737,0.40829,0.36416,0.3473,0.21788,0.21565,0.24234,0.229  
74,0.25114,0.24776,0.14379,0.18975,0.17522,0.17289,0.18755,0.1676,0.20  
496,0.18167,0.1779,0.07923,0.074522,0.073511,0.075365,0.073371,0.07711  
7,0.076967,0.079441,0.077373,0.081158,0.077842,0.07746,0.076949,0.0717  
77,0.074755,0.071629,0.077198,0.076402,0.34652,0.38229,0.40306,0.22051  
,0.20798,0.20452,0.22047,0.21979,0.21338,0.22932,0.22913,0.18637,0.188  
81,0.1818,0.18529,0.18396,0.17972,0.17461,0.17743,0.19215,0.07902,0.07  
8842,0.075201,0.079398,0.073955,0.078724,0.079194,0.078683,0.075677,0.  
080875,0.076962,0.072523,0.0789,0.080415,0.072215,0.074931,0.078814,0.  
079211,0.3632,0.20164,0.22548,0.21958,0.23412,0.20824,0.22577,0.21823,  
0.2084,0.21724,0.20653,0.1787,0.15855,0.18623,0.16814,0.17694,0.16418,  
0.17869,0.17563,0.081417,0.072547,0.078703,0.07978,0.081506,0.072706,0  
.074527,0.077606,0.079093,0.077359,0.073671,0.078023,0.081333,0.078485  
,0.076984,0.077335,0.075798,0.058486,0.20824,0.25237,0.27699,0.21006,0  
.20585,0.22343,0.21058,0.21394,0.27008,0.22641,0.16729,0.19126,0.16007  
,0.18977,0.1684,0.16935,0.16786,0.18671,0.1799,0.075148,0.076654,0.075  
878,0.077594,0.075861,0.078853,0.077769,0.076285,0.07777,0.072065,0.07  
6153,0.078288,0.08107,0.0797,0.073403,0.081751,0.076537,0.062647,0.232  
68,0.20733,0.21582,0.21704,0.22732,0.20699,0.2189,0.2144,0.22482,0.241  
99,0.16963,0.18322,0.17857,0.17848,0.17428,0.17861,0.1748,0.16465,0.07  
7058,0.081415,0.079937,0.079518,0.076007,0.078674,0.080197,0.078262,0.  
080081,0.079545,0.077788,0.074053,0.075982,0.077887,0.07594,0.081886,0  
.080002,0.085581,0.061181,0.23371,0.22522,0.20952,0.17955,0.24068,0.20  
979,0.22696,0.25743,0.20581,0.20543,0.18177,0.18689,0.17393,0.19196,0.  
2017,0.18355,0.19786,0.18092,0.077749,0.074954,0.073628,0.07679,0.0756  
9,0.074011,0.078384,0.078434,0.074046,0.079067,0.079644,0.076483,0.076  
108,0.078871,0.075883,0.078921,0.077255,0.061819,0.063732,0.060331,0.2  
0883,0.21357,0.22883,0.21198,0.22719,0.34031,0.25182,0.24516,0.2357,0.

18956,0.1649,0.1856,0.18212,0.2015,0.18544,0.077464,0.075876,0.076595,  
0.077068,0.074002,0.075269,0.074114,0.078707,0.073793,0.076932,0.07819  
8,0.077901,0.076164,0.074303,0.077533,0.076661,0.081826,0.085011,0.061  
693,0.062166,0.061786,0.058551,0.21454,0.23579,0.20439,0.21333,0.21478  
,0.2378,0.20466,0.28277,0.21365,0.16342,0.16142,0.17542,0.078082,0.080  
362,0.075153,0.0773,0.074957,0.076882,0.077799,0.075629,0.077798,0.077  
528,0.074156,0.077334,0.073514,0.07775,0.07175,0.075315,0.077271,0.075  
34,0.07714,0.079093,0.060766,0.064346,0.062424,0.060189,0.058459,0.060  
657,0.22366,0.20066,0.21958,0.26146,0.21129,0.2309,0.24015,0.22982,0.0  
76595,0.077506,0.079988,0.07607,0.07767,0.07714,0.07427,0.078782,0.079  
82,0.073109,0.081899,0.080031,0.077818,0.075504,0.078899,0.075204,0.07  
3733,0.079597,0.078902,0.074209,0.077089,0.076322,0.077191,0.059667,0.  
059846,0.062967,0.061461,0.058156,0.064587,0.23412,0.18432,0.20972,0.1  
9921,0.22637,0.060146,0.058428,0.080693,0.078517,0.075427,0.081234,0.0  
75928,0.075859,0.076786,0.075952,0.076154,0.073402,0.075928,0.076354,0.  
.075765,0.076841,0.080829,0.074906,0.074586,0.075449,0.078707,0.07692,  
0.079279,0.060121,0.060163,0.062137,0.059752,0.060472,0.058005,0.05917  
4,0.060606,0.057156,0.062589,0.29707,0.27054,0.059077,0.064809,0.06022  
1,0.058386,0.072563,0.079107,0.076858,0.075179,0.080848,0.075842,0.076  
874,0.077823,0.074758,0.076529,0.063203,0.075283,0.075326,0.075375,0.0  
72043,0.083386,0.076917,0.078608,0.079984,0.058721,0.06093,0.059524,0.  
062731,0.063868,0.059692,0.062952,0.059712,0.060577,0.060338,0.060782,  
0.059692,0.058395,0.057797,0.056248,0.060063,0.060396,0.078571,0.08083  
6,0.077977,0.075469,0.071736,0.08272,0.081651,0.075152,0.076797,0.0797  
34,0.076029,0.074453,0.079745,0.083102,0.079401,0.075065,0.062563,0.06  
0404,0.062568,0.061974,0.058554,0.06357,0.062402,0.060787,0.05786,0.06  
1492,0.060516,0.061197,0.058209,0.059096,0.058112,0.061859,0.060137,0.  
061044,0.059824,0.079206,0.079703,0.078666,0.078445,0.077857,0.079227,  
0.076319,0.079371,0.077743,0.076119,0.076066,0.076841,0.076535,0.06124  
6,0.059044,0.060507,0.063442,0.059753,0.061593,0.056659,0.063665,0.063  
342,0.062708,0.059991,0.05872,0.059819,0.061304,0.060999,0.062167,0.06  
3283,0.059951,0.059215,0.061205,0.062012,0.075619,0.075432,0.077582,0.  
080155,0.082603,0.074796,0.082855,0.070328,0.0791,0.063267,0.062784,0.  
061524,0.060027,0.062191,0.060355,0.059042,0.060699,0.060413,0.059269,  
0.059492,0.059661,0.064616,0.057025,0.058777,0.06526,0.059478,0.058942  
,0.06095,0.062011,0.05808,0.060495,0.058286,0.063203,0.06004,0.077515,  
0.077549,0.076706,0.074557,0.058114,0.062105,0.058678,0.06199,0.059658  
,0.061967,0.06134,0.061384,0.060513,0.058342,0.062285,0.060743,0.06053  
5,0.059262,0.061098,0.059778,0.060344,0.060964,0.058467,0.059272,0.060  
967,0.058149,0.060814,0.060782,0.062542,0.061152,0.060982,0.057731,0.0  
63116,0.06219,0.060392,0.062151,0.062617,0.061514,0.054484,0.064024,0.  
062599,0.062156,0.061257,0.061735,0.06139,0.057494,0.06085,0.060384,0.  
059788,0.059508,0.058932,0.058421,0.062534,0.063579,0.058518,0.062995,  
0.064119,0.063925,0.062902,0.062016,0.060126,0.062635,0.058944,0.06367  
,0.059286,0.061298,0.063534,0.057404,0.061999,0.060579,0.0618,0.060172  
,0.060197,0.06106,0.061382,0.058369,0.058869,0.06124,0.064082,0.058171  
,0.06062,0.060078,0.060523,0.05676,0.06123,0.059386,0.062112,0.057559,  
0.057308,0.060824,0.061981,0.06281,0.059714,0.060452,0.062535,0.059366  
,0.059047,0.05907,0.059567,0.060368,0.058927,0.062264,0.061628,0.06260  
4,0.061683,0.063154,0.060997,0.05857,0.060324,0.060827,0.062674,0.0617  
06,0.063052,0.060314,0.064603,0.062733,0.055487,0.059367,0.062352,0.05  
9182,0.062171,0.059419,0.063463,0.062516,0.064698,0.064045,0.059984,0.

058933,0.060295,0.061469,0.059286,0.06084,0.059755,0.060725,0.060429,0.062503,0.058624,0.060819,0.060932,0.061452,0.06204,0.064086,0.062404,0.061015,0.057836,0.05667,0.062825,0.063164,0.060305,0.060765,0.06217,0.057311,0.059908,0.06164,0.060871,0.062098,0.06191,0.061118,0.063516,0.061311,0.061726,0.062041,0.063102,0.062428,0.059971,0.057463,0.059726,0.059859,0.057709,0.060361,0.061869,0.061052,0.060292,0.062469,0.059653,0.063473,0.061559,0.062119,0.060524,0.061036,0.059665,0.059715,0.060719,0.061227,0.060796,0.063107,0.061464,0.061889,0.065101,0.060175,0.062895,0.060652,0.060084,0.060647,0.063977,0.058182,0.063355,0.060913,0.05982

0.089614,0.088458,0.089993,0.088376,0.091183,0.085939,0.088938,0.08816,0.087857,0.087326,0.089342,0.087091,0.086478,0.08847,0.086001,0.089296,0.086131,0.087196,0.089403,0.088763,0.20939,0.24814,0.21153,0.24407,0.08606,0.088196,0.088241,0.090572,0.089478,0.089119,0.088272,0.087203,0.088905,0.089734,0.087039,0.090241,0.089975,0.089182,0.08758,0.39726,0.24799,0.23336,0.2449,0.26546,0.24641,0.2517,0.088043,0.088295,0.088276,0.087326,0.086627,0.089658,0.085442,0.085038,0.087374,0.089216,0.089362,0.089119,0.087585,0.088049,0.08774,0.34801,0.35271,0.22474,0.23407,0.22322,0.24345,0.24339,0.20724,0.20542,0.24453,0.087829,0.087172,0.088524,0.0875,0.087771,0.0894,0.089956,0.088627,0.08926,0.088034,0.08789,0.086791,0.08788,0.087665,0.086499,0.36474,0.35638,0.40859,0.23788,0.23899,0.21978,0.19946,0.21747,0.22611,0.2455,0.1958,0.27124,0.086447,0.088789,0.08572,0.086019,0.088836,0.088442,0.089057,0.088369,0.087346,0.087706,0.087148,0.086772,0.089819,0.085813,0.086841,0.091145,0.37507,0.34488,0.38918,0.43152,0.20991,0.23237,0.23835,0.24795,0.24794,0.22959,0.21908,0.22717,0.22057,0.21512,0.090512,0.087972,0.089653,0.087106,0.08786,0.089934,0.090185,0.088753,0.088404,0.086576,0.086397,0.087099,0.087439,0.088122,0.088344,0.089245,0.39574,0.33682,0.34344,0.36734,0.33272,0.34821,0.23707,0.17457,0.19688,0.21641,0.21979,0.2439,0.2409,0.20116,0.18789,0.25351,0.088687,0.085543,0.0867,0.091405,0.089631,0.087926,0.085006,0.088502,0.090056,0.090058,0.090252,0.086412,0.085223,0.088585,0.087222,0.090108,0.088956,0.37142,0.37343,0.37045,0.37185,0.39938,0.36028,0.22709,0.24955,0.24945,0.24525,0.23649,0.26155,0.24028,0.22804,0.2726,0.22029,0.23207,0.084363,0.088409,0.086552,0.090703,0.089696,0.088238,0.086232,0.087626,0.090215,0.094275,0.090886,0.086782,0.089045,0.070627,0.074417,0.074239,0.088013,0.34595,0.38527,0.37401,0.35549,0.37491,0.3947,0.36256,0.20563,0.2235,0.2435,0.22319,0.23332,0.24373,0.25268,0.25829,0.26842,0.22452,0.21867,0.087508,0.090913,0.086631,0.086779,0.087099,0.085896,0.087382,0.085434,0.086822,0.088858,0.089146,0.07249,0.072249,0.070546,0.078087,0.075072,0.067413,0.086992,0.36954,0.36893,0.36079,0.36937,0.37867,0.33617,0.38392,0.21628,0.18609,0.24403,0.23213,0.22377,0.28305,0.18956,0.21178,0.25629,0.25208,0.22484,0.08901,0.088437,0.086867,0.086814,0.088792,0.088763,0.089797,0.086792,0.087746,0.071763,0.073524,0.070935,0.073394,0.073401,0.073056,0.075203,0.071462,0.070088,0.089293,0.35641,0.35363,0.36771,0.36644,0.34199,0.38741,0.40487,0.23896,0.22094,0.23586,0.25767,0.22843,0.23855,0.23694,0.22065,0.25253,0.23906,0.25126,0.22654,0.087458,0.088635,0.089855,0.087327,0.089183,0.09084,0.066252,0.070421,0.073319,0.074957,0.075859,0.069601,0.074838,0.073066,0.073597,0.076543,0.073777,0.071839,0.34349,0.36764,0.39088,0.37012,0.38557,0.38048,0.38473,0.22219,0.22101,0.23015,0.2571,0.26431,0.22844,0.21806,0.22216,0.23865,0.23462,0.17818,0.23605,0.088301,0.088478,0.091817,0.075506,0.073512,0.074068,0.074277,0

.076465,0.071635,0.075664,0.074138,0.071466,0.076344,0.076158,0.07164,  
0.076617,0.072606,0.073369,0.39238,0.3393,0.39742,0.33733,0.3922,0.389  
66,0.36532,0.36468,0.37338,0.23526,0.26288,0.22185,0.24401,0.23394,0.2  
1001,0.27208,0.25037,0.23797,0.21446,0.22438,0.075648,0.071547,0.07229  
5,0.073966,0.075717,0.074767,0.074394,0.072319,0.070607,0.077742,0.073  
112,0.071907,0.071204,0.075979,0.073247,0.073727,0.071855,0.069098,0.3  
746,0.37721,0.3478,0.3825,0.38477,0.38522,0.41054,0.35626,0.38055,0.22  
735,0.21374,0.17103,0.17883,0.17431,0.1569,0.1881,0.16358,0.17494,0.16  
968,0.17546,0.074677,0.069882,0.071284,0.073466,0.07566,0.072382,0.070  
935,0.065397,0.07152,0.075465,0.079468,0.073906,0.072031,0.076881,0.07  
3349,0.072999,0.064799,0.076542,0.37803,0.35118,0.38839,0.39771,0.3796  
1,0.39752,0.39608,0.37274,0.362,0.20799,0.18244,0.17379,0.2205,0.20192  
,0.16918,0.17998,0.15514,0.15785,0.17326,0.2035,0.074728,0.072909,0.07  
6774,0.070692,0.073912,0.075372,0.073369,0.075286,0.075872,0.075564,0.  
072692,0.073669,0.076697,0.07139,0.076797,0.070667,0.07665,0.069661,0.  
40445,0.36766,0.34821,0.38015,0.38831,0.39647,0.37329,0.17482,0.24756,  
0.24385,0.18102,0.15177,0.17167,0.18302,0.19111,0.19002,0.1798,0.12745  
,0.14297,0.16726,0.074762,0.074974,0.073538,0.074007,0.073707,0.073196  
,0.072321,0.07344,0.073659,0.07373,0.0734,0.074545,0.073711,0.072096,0  
.073402,0.074721,0.071689,0.070308,0.39367,0.38092,0.4047,0.3644,0.366  
47,0.35599,0.19786,0.20349,0.21886,0.20086,0.26832,0.19401,0.1651,0.15  
584,0.16918,0.16385,0.15032,0.16802,0.17202,0.16876,0.074659,0.070606,  
0.074206,0.075063,0.076183,0.074398,0.073716,0.07327,0.07553,0.073197,  
0.074473,0.074978,0.074025,0.077464,0.073186,0.077335,0.072441,0.06994  
7,0.38748,0.36402,0.39577,0.36463,0.35122,0.22002,0.22115,0.2282,0.229  
39,0.24661,0.24591,0.1393,0.18133,0.16544,0.16684,0.18398,0.1613,0.203  
87,0.17722,0.17347,0.075477,0.071405,0.069308,0.071938,0.069929,0.0727  
64,0.072857,0.073416,0.072917,0.076762,0.074485,0.073647,0.072543,0.06  
8241,0.072055,0.069229,0.074342,0.072936,0.3501,0.37307,0.41555,0.2130  
6,0.20021,0.19869,0.2206,0.22111,0.20845,0.22875,0.21759,0.18441,0.187  
68,0.17517,0.17743,0.17795,0.17434,0.17465,0.17304,0.1848,0.074975,0.0  
74728,0.07192,0.075354,0.070822,0.075049,0.076156,0.074454,0.07082,0.0  
76489,0.073666,0.069467,0.074517,0.074965,0.069898,0.07083,0.07481,0.0  
75233,0.35338,0.19418,0.2257,0.22037,0.23128,0.20253,0.23302,0.21218,0  
.20594,0.21899,0.20046,0.17196,0.15495,0.18209,0.16616,0.17056,0.16278  
,0.17126,0.17212,0.075854,0.068616,0.073705,0.076806,0.07769,0.069617,  
0.071285,0.072342,0.07561,0.0735,0.070762,0.073315,0.077331,0.073799,0  
.073287,0.07328,0.071763,0.056947,0.20376,0.2476,0.27435,0.20173,0.200  
03,0.21679,0.20526,0.207,0.25866,0.21261,0.16327,0.19106,0.15311,0.182  
88,0.165,0.16113,0.1615,0.17736,0.17205,0.073353,0.071462,0.071531,0.0  
74077,0.071961,0.074969,0.074046,0.073208,0.074312,0.068031,0.072369,0  
.073109,0.076908,0.075337,0.07036,0.077182,0.073916,0.060121,0.22713,0  
.20026,0.20581,0.21725,0.22245,0.20428,0.2147,0.20596,0.21791,0.23392,  
0.16752,0.18481,0.1682,0.17194,0.1694,0.17868,0.16859,0.16388,0.073152  
,0.077353,0.074252,0.075492,0.072452,0.075247,0.075915,0.074403,0.0765  
19,0.074854,0.073222,0.071227,0.073469,0.07488,0.071638,0.079786,0.076  
037,0.081993,0.060803,0.22579,0.21575,0.2017,0.17807,0.23488,0.21437,0  
.21297,0.24818,0.20077,0.20205,0.17385,0.18035,0.16788,0.18592,0.19086  
,0.17785,0.19357,0.17918,0.074097,0.071138,0.068911,0.074118,0.070474,  
0.070359,0.073439,0.073902,0.069879,0.075794,0.075017,0.07282,0.071722  
,0.07483,0.073632,0.075937,0.073077,0.060751,0.061654,0.059209,0.20183  
,0.20101,0.2098,0.20277,0.21851,0.34413,0.25056,0.23476,0.22121,0.1807

3,0.15984,0.17971,0.1741,0.20139,0.18317,0.073307,0.071584,0.072065,0.07372,0.070973,0.072362,0.070791,0.075074,0.069813,0.073173,0.074045,0.073572,0.073885,0.070577,0.073875,0.073259,0.077607,0.080373,0.0594,0.059681,0.060465,0.057907,0.21249,0.23233,0.19849,0.20639,0.20703,0.22841,0.19755,0.28005,0.21745,0.16134,0.15615,0.16892,0.074069,0.076366,0.071123,0.073818,0.071027,0.073684,0.074446,0.072123,0.074295,0.074134,0.071232,0.073083,0.071066,0.074269,0.068398,0.071652,0.074392,0.070762,0.072469,0.076286,0.058364,0.061113,0.059586,0.05769,0.056705,0.058431,0.20937,0.19358,0.21201,0.25381,0.21039,0.23001,0.24107,0.22245,0.073117,0.073,0.075787,0.072047,0.074221,0.07247,0.069461,0.074924,0.074409,0.070536,0.078118,0.076209,0.073208,0.07124,0.074797,0.071376,0.069365,0.074784,0.074893,0.069975,0.074279,0.072406,0.072447,0.057888,0.057691,0.061538,0.058956,0.055389,0.063293,0.22923,0.18055,0.19914,0.19335,0.21768,0.057903,0.057286,0.076737,0.075304,0.072196,0.07699,0.074379,0.073465,0.07399,0.072902,0.072741,0.069097,0.072447,0.072738,0.0717,0.073139,0.077126,0.072309,0.070816,0.07197,0.074385,0.072209,0.077258,0.058775,0.058534,0.059631,0.056929,0.056584,0.05559,0.05732,0.060045,0.055769,0.060979,0.29725,0.26679,0.057708,0.06343,0.058205,0.05711,0.068428,0.075394,0.073977,0.072384,0.075769,0.073084,0.072052,0.073128,0.070725,0.073183,0.059647,0.070789,0.071019,0.071266,0.068088,0.07838,0.072804,0.074657,0.076626,0.057186,0.05856,0.058807,0.060548,0.061437,0.057918,0.060091,0.059031,0.058122,0.058476,0.057976,0.058379,0.056494,0.057211,0.054697,0.05797,0.059448,0.075105,0.076262,0.073534,0.071207,0.069144,0.078736,0.076243,0.070586,0.071555,0.075574,0.072644,0.070606,0.075901,0.078794,0.074103,0.071863,0.059017,0.058837,0.060336,0.059908,0.057505,0.061533,0.061537,0.059552,0.055187,0.059673,0.058653,0.058993,0.054929,0.057803,0.055558,0.060016,0.058171,0.058495,0.057167,0.075366,0.07521,0.074141,0.074838,0.075256,0.075047,0.073233,0.075682,0.074312,0.072757,0.0724,0.073307,0.073055,0.059778,0.057106,0.057411,0.060087,0.057164,0.059265,0.054461,0.061317,0.061322,0.060387,0.057892,0.057242,0.058249,0.059634,0.058804,0.060178,0.059823,0.057331,0.056237,0.057864,0.05968,0.071626,0.071826,0.074455,0.076323,0.077462,0.072065,0.078537,0.068355,0.074102,0.059324,0.060579,0.059248,0.056125,0.060053,0.058724,0.058943,0.058007,0.058724,0.056658,0.05865,0.057835,0.0598,0.056433,0.056806,0.062209,0.058026,0.05746,0.059712,0.059804,0.056173,0.058843,0.056991,0.060423,0.058623,0.073185,0.074463,0.073207,0.07119,0.056836,0.061151,0.059248,0.058849,0.057787,0.05855,0.058555,0.057808,0.05729,0.057359,0.060379,0.057965,0.059303,0.056975,0.059302,0.056715,0.058271,0.060112,0.056737,0.056696,0.059458,0.057142,0.05694,0.058989,0.059638,0.060019,0.059025,0.055946,0.062221,0.059582,0.059595,0.059315,0.060418,0.059651,0.052701,0.062194,0.059692,0.061003,0.059118,0.058773,0.060447,0.056776,0.058843,0.058792,0.056353,0.057732,0.056981,0.056914,0.060487,0.061113,0.057305,0.060859,0.060766,0.060652,0.062634,0.060036,0.059389,0.060367,0.056495,0.060011,0.057652,0.057672,0.061514,0.055778,0.060415,0.058124,0.059334,0.059285,0.058165,0.060096,0.058703,0.056135,0.055852,0.058686,0.061092,0.05729,0.059129,0.057903,0.057913,0.054096,0.058781,0.057488,0.060113,0.055375,0.055694,0.057203,0.060885,0.061634,0.058149,0.057563,0.06011,0.056815,0.058601,0.057322,0.057042,0.05849,0.055957,0.060908,0.059315,0.061716,0.05861,0.060492,0.059159,0.058338,0.059929,0.058206,0.0609,0.058488,0.060689,0.057594,0.061666,0.060522,0.056771,0.056783,0.05874,0.057061,0.060926,0.056966,0.061834,0.059763,0.06246,0.062046,0.057703,0.05

8662,0.058309,0.0601,0.056663,0.059105,0.057355,0.058847,0.059117,0.06  
0265,0.05592,0.057892,0.05839,0.058396,0.060375,0.06199,0.059757,0.058  
85,0.055428,0.055828,0.06049,0.059367,0.05863,0.058275,0.059309,0.0549  
07,0.058499,0.060231,0.058989,0.060209,0.059598,0.058812,0.06203,0.058  
492,0.059026,0.058891,0.060798,0.061702,0.056706,0.055374,0.059458,0.0  
57507,0.055439,0.057739,0.060418,0.05794,0.058394,0.061263,0.056148,0.  
060266,0.059526,0.059507,0.057641,0.059977,0.056068,0.057246,0.059125,  
0.060357,0.060602,0.061897,0.059386,0.060347,0.062639,0.058103,0.06072  
2,0.058526,0.056758,0.057626,0.060667,0.058192,0.060996,0.05904,0.0572  
69  
0.08584,0.084633,0.084785,0.085592,0.086519,0.081896,0.084394,0.08414,  
0.085254,0.08396,0.08542,0.083432,0.082325,0.083658,0.080531,0.083722,  
0.081405,0.082777,0.085355,0.084402,0.20214,0.23938,0.20621,0.23907,0.  
082585,0.083354,0.083385,0.086329,0.08456,0.08478,0.083855,0.082507,0.  
084925,0.085456,0.08222,0.086484,0.084572,0.085461,0.082498,0.38717,0.  
24828,0.22899,0.23643,0.2496,0.23821,0.246,0.084521,0.083677,0.083155,  
0.082447,0.081698,0.085369,0.082186,0.082669,0.083391,0.085241,0.08552  
2,0.083484,0.083676,0.084051,0.083707,0.35304,0.33138,0.22211,0.22141,  
0.22474,0.24025,0.23796,0.20835,0.20284,0.23584,0.083456,0.08366,0.085  
343,0.082451,0.083834,0.085015,0.085457,0.084382,0.0849,0.083491,0.082  
421,0.083657,0.083615,0.083625,0.082797,0.36758,0.34937,0.39479,0.2271  
4,0.23907,0.21111,0.20049,0.21733,0.23142,0.24178,0.18859,0.26798,0.08  
2862,0.0852,0.081245,0.081,0.085203,0.083636,0.084714,0.083469,0.08261  
9,0.083353,0.082888,0.082956,0.0852,0.081583,0.082242,0.086984,0.36094  
,0.34593,0.37891,0.42128,0.20991,0.22486,0.23427,0.24311,0.24401,0.226  
64,0.21213,0.22196,0.2159,0.21016,0.085988,0.083513,0.08537,0.081973,0  
.08441,0.084825,0.085822,0.08338,0.084082,0.08227,0.08303,0.08261,0.08  
3254,0.084676,0.083892,0.085095,0.37897,0.33167,0.34062,0.37479,0.3420  
2,0.36775,0.23566,0.17277,0.19531,0.20818,0.21648,0.22596,0.23291,0.19  
653,0.18268,0.25155,0.083936,0.081567,0.082861,0.0876,0.085299,0.08346  
7,0.08009,0.08475,0.085651,0.084925,0.085673,0.082997,0.080498,0.08278  
2,0.083161,0.085,0.085426,0.36601,0.36453,0.37018,0.3692,0.39689,0.351  
45,0.22348,0.24146,0.24091,0.23387,0.23438,0.25433,0.23236,0.22758,0.2  
6648,0.21583,0.22653,0.078922,0.083333,0.082088,0.085559,0.084451,0.08  
4416,0.082324,0.084551,0.08522,0.089453,0.087139,0.081921,0.085369,0.0  
68132,0.070469,0.07279,0.083186,0.35061,0.38669,0.3689,0.34618,0.37681  
,0.38633,0.36231,0.2013,0.21735,0.24486,0.21555,0.22789,0.23006,0.2465  
2,0.25167,0.2596,0.22058,0.21447,0.082584,0.086174,0.082513,0.082745,0  
.082182,0.080608,0.082387,0.080893,0.081875,0.0849,0.084009,0.069519,0  
.06894,0.068753,0.074544,0.071164,0.064755,0.082999,0.35607,0.37524,0.  
35028,0.34947,0.38157,0.34993,0.38273,0.20439,0.18271,0.24926,0.22561,  
0.2196,0.27,0.17825,0.20599,0.25147,0.24125,0.22153,0.085423,0.082499,  
0.081679,0.081891,0.084083,0.085347,0.085028,0.083387,0.082645,0.06828  
6,0.069244,0.068615,0.07124,0.069925,0.070328,0.072144,0.069522,0.0671  
11,0.086081,0.34371,0.34732,0.36591,0.35442,0.33898,0.37386,0.4047,0.2  
2926,0.21565,0.23277,0.25262,0.22133,0.23551,0.24049,0.22117,0.23957,0  
.23436,0.24669,0.22174,0.083244,0.083869,0.08495,0.083334,0.084976,0.0  
85444,0.064235,0.067735,0.069299,0.071473,0.074408,0.066247,0.073683,0  
.06962,0.071338,0.073854,0.071536,0.068151,0.34721,0.3637,0.38364,0.36  
974,0.37227,0.36889,0.38257,0.22016,0.21517,0.2221,0.25614,0.25517,0.2  
2001,0.20636,0.21397,0.23378,0.23828,0.17823,0.23006,0.083997,0.084061  
,0.087195,0.073345,0.069855,0.071281,0.070525,0.074091,0.068111,0.0716

63,0.070585,0.068338,0.072852,0.072927,0.069192,0.072342,0.069052,0.0696,0.38848,0.33445,0.37726,0.32991,0.38426,0.37506,0.36736,0.36963,0.37053,0.22802,0.26324,0.21123,0.23795,0.2319,0.20437,0.26636,0.24254,0.23734,0.21338,0.21433,0.071984,0.068401,0.069763,0.071261,0.073191,0.071671,0.071455,0.071068,0.068481,0.073544,0.069821,0.069198,0.068915,0.073567,0.070409,0.069246,0.069774,0.068204,0.38602,0.38849,0.34081,0.37679,0.38565,0.38021,0.42129,0.34318,0.37494,0.22562,0.21634,0.16221,0.17947,0.16817,0.14976,0.1786,0.16158,0.17317,0.17015,0.16786,0.072631,0.067378,0.068907,0.07028,0.071406,0.068904,0.068431,0.06338,0.068062,0.071943,0.076483,0.071499,0.068042,0.073233,0.070466,0.069443,0.062075,0.072689,0.36471,0.35107,0.38778,0.39258,0.37092,0.37861,0.37305,0.36477,0.36671,0.20747,0.17562,0.17638,0.21637,0.19685,0.16679,0.18199,0.14881,0.15541,0.16841,0.19927,0.070877,0.070543,0.073453,0.06758,0.070952,0.070978,0.070235,0.072706,0.074251,0.073127,0.069224,0.07075,0.074537,0.068716,0.073261,0.068025,0.073845,0.066931,0.38803,0.36025,0.34036,0.38427,0.39538,0.39089,0.36169,0.17122,0.23604,0.2484,0.17788,0.14596,0.16725,0.18181,0.18616,0.18572,0.17142,0.12431,0.14133,0.16165,0.071221,0.070328,0.068605,0.069963,0.071317,0.071141,0.070449,0.071134,0.071083,0.070882,0.071211,0.072326,0.071676,0.069235,0.069552,0.071739,0.067832,0.067143,0.38108,0.37222,0.38532,0.36199,0.3538,0.35041,0.18908,0.19902,0.22289,0.20133,0.26178,0.18598,0.16814,0.1514,0.16494,0.1603,0.1477,0.16081,0.16873,0.1696,0.072158,0.067434,0.071172,0.071928,0.072346,0.072128,0.071411,0.071733,0.072043,0.0694,0.070984,0.071879,0.07123,0.074972,0.070032,0.073413,0.069757,0.067062,0.38116,0.3764,0.38874,0.35113,0.34804,0.21904,0.21593,0.21758,0.22165,0.24192,0.25242,0.13417,0.18066,0.16062,0.16088,0.17942,0.16081,0.20664,0.17211,0.17174,0.072023,0.068056,0.066286,0.069019,0.066897,0.06961,0.070242,0.070279,0.070915,0.073936,0.073226,0.070662,0.068969,0.066155,0.068685,0.066782,0.071053,0.070507,0.33784,0.36705,0.41413,0.20911,0.20326,0.19769,0.219,0.21365,0.20374,0.2259,0.21341,0.18497,0.18406,0.17411,0.17486,0.17225,0.16913,0.17539,0.16619,0.18045,0.072035,0.071514,0.069028,0.072736,0.069071,0.072331,0.073804,0.072741,0.068061,0.073842,0.071038,0.066915,0.070963,0.073516,0.066709,0.070204,0.071612,0.07232,0.34767,0.19428,0.22714,0.22235,0.22243,0.20245,0.22931,0.20083,0.20032,0.21201,0.19867,0.17331,0.15197,0.18157,0.15985,0.16774,0.15727,0.16304,0.1695,0.071645,0.064988,0.071411,0.073399,0.075891,0.067826,0.068992,0.068875,0.073187,0.070005,0.067847,0.069401,0.075061,0.0713,0.070886,0.07023,0.068091,0.056023,0.20192,0.24523,0.26806,0.20097,0.19953,0.21083,0.1968,0.20474,0.2626,0.21144,0.16345,0.18934,0.15019,0.18043,0.15879,0.1593,0.15746,0.16847,0.16734,0.070099,0.069074,0.069473,0.071427,0.06865,0.071901,0.071924,0.070138,0.071824,0.064542,0.067846,0.070524,0.073653,0.071769,0.068264,0.074529,0.070931,0.056799,0.22514,0.1975,0.20025,0.21033,0.22422,0.20873,0.21329,0.2024,0.2151,0.23985,0.15854,0.17379,0.17079,0.16611,0.1684,0.1779,0.16455,0.1631,0.069808,0.07381,0.072539,0.071993,0.069802,0.073247,0.072723,0.071577,0.07394,0.072326,0.070561,0.068399,0.070655,0.071255,0.067846,0.07615,0.07242,0.078854,0.059535,0.22127,0.21101,0.19867,0.17815,0.22708,0.21739,0.20867,0.24958,0.19348,0.20447,0.17287,0.18203,0.16377,0.18233,0.18138,0.17673,0.19159,0.17499,0.071467,0.068785,0.066491,0.073024,0.066904,0.069259,0.069087,0.070719,0.068292,0.072825,0.072513,0.069899,0.069551,0.072081,0.070623,0.072875,0.071587,0.060004,0.060461,0.058132,0.20651,0.19791,0.2027,0.19853,0.20923,0.34063,0.25295,0.2283,0.20994,0.17747,0.15613



,0.17255,0.16859,0.19728,0.17499,0.069347,0.067953,0.067974,0.071523,0.069082,0.068914,0.067452,0.072707,0.066627,0.069628,0.071528,0.071274,0.070034,0.067434,0.071208,0.070357,0.073631,0.075999,0.058137,0.057719,0.059313,0.056419,0.21422,0.22469,0.20217,0.20354,0.20026,0.21803,0.18809,0.27503,0.21723,0.16059,0.15126,0.16943,0.071585,0.073113,0.067835,0.070351,0.06873,0.070215,0.073066,0.06909,0.071403,0.07028,0.069112,0.070583,0.066969,0.071569,0.064967,0.069245,0.072276,0.068452,0.069143,0.073718,0.056517,0.059495,0.058728,0.0554,0.056029,0.058052,0.2005,0.18741,0.21121,0.23891,0.20759,0.22457,0.23321,0.2176,0.070758,0.069268,0.073569,0.070079,0.072251,0.069855,0.066874,0.072338,0.072004,0.068376,0.075427,0.074215,0.069901,0.068443,0.071377,0.068089,0.067067,0.072553,0.073064,0.067786,0.070153,0.069034,0.069187,0.055584,0.056985,0.06049,0.057146,0.054604,0.062392,0.22276,0.17646,0.18925,0.19055,0.21037,0.056815,0.056319,0.074509,0.072496,0.067771,0.07459,0.070679,0.069303,0.070365,0.070788,0.069467,0.067407,0.069995,0.070412,0.069937,0.071224,0.073025,0.069845,0.068637,0.069797,0.071396,0.068817,0.074502,0.0582,0.056691,0.058101,0.056362,0.056056,0.054476,0.055972,0.058521,0.05386,0.059085,0.28463,0.25648,0.055978,0.061353,0.056164,0.055401,0.064735,0.07217,0.071774,0.070431,0.07329,0.070631,0.069982,0.069993,0.068211,0.070172,0.058138,0.068852,0.068511,0.067693,0.065703,0.074923,0.069913,0.070347,0.07255,0.058146,0.057598,0.057799,0.058183,0.059153,0.058269,0.057967,0.057606,0.056368,0.057338,0.056157,0.057091,0.055722,0.05612,0.053441,0.055795,0.059293,0.073031,0.072791,0.070829,0.068653,0.066242,0.075632,0.072407,0.067568,0.068375,0.070918,0.069835,0.067445,0.071707,0.075343,0.07239,0.069534,0.057937,0.05753,0.058771,0.059488,0.057684,0.060089,0.060467,0.057512,0.05387,0.057701,0.057868,0.056867,0.053214,0.057071,0.056257,0.05743,0.056846,0.057098,0.055468,0.070905,0.072963,0.072227,0.07069,0.071807,0.071866,0.070083,0.072121,0.071787,0.069548,0.070139,0.06996,0.070675,0.057759,0.055125,0.056127,0.058904,0.055629,0.058128,0.053369,0.058423,0.060689,0.059096,0.056414,0.055829,0.055849,0.05744,0.056749,0.059168,0.058412,0.055249,0.056562,0.056315,0.058815,0.068562,0.068986,0.072019,0.073621,0.074267,0.069205,0.074709,0.066585,0.070889,0.057985,0.058584,0.056308,0.055011,0.058282,0.056624,0.057817,0.057346,0.057627,0.05408,0.056483,0.056544,0.05838,0.055823,0.056442,0.059474,0.056063,0.057552,0.058254,0.058792,0.055005,0.0553,0.056713,0.05854,0.056983,0.069678,0.072725,0.069877,0.068634,0.054518,0.059018,0.057002,0.059261,0.055168,0.056626,0.057376,0.055787,0.055558,0.055471,0.056137,0.057035,0.057396,0.055065,0.057975,0.053618,0.057285,0.059167,0.055891,0.05515,0.058334,0.055164,0.055849,0.0578,0.058706,0.057848,0.057196,0.055451,0.061241,0.057729,0.056218,0.057828,0.05801,0.058206,0.053295,0.060385,0.05832,0.058816,0.05773,0.057728,0.057953,0.056649,0.058285,0.05799,0.054683,0.056366,0.056116,0.056783,0.057381,0.06089,0.055969,0.061051,0.059801,0.060172,0.060966,0.058902,0.058454,0.058596,0.05415,0.0601,0.055967,0.056154,0.060258,0.054685,0.057187,0.056373,0.057969,0.059045,0.05684,0.058814,0.057917,0.05466,0.055025,0.057737,0.059381,0.057245,0.057581,0.057408,0.055188,0.053314,0.057276,0.055028,0.057295,0.055258,0.053664,0.056454,0.058857,0.060805,0.055741,0.056948,0.058991,0.05655,0.056965,0.055459,0.055809,0.058233,0.055304,0.057643,0.058187,0.060068,0.057335,0.057712,0.057618,0.05656,0.057975,0.057284,0.05907,0.05782,0.058491,0.055327,0.060512,0.059566,0.055189,0.055869,0.058712,0.056147,0.058552,0.054817,0.060008,0.0584,0.060837,0.060461,0.056245,0.056236,0.055571,

0.059331,0.054978,0.058141,0.055925,0.058073,0.057181,0.05947,0.053886  
,0.057373,0.056196,0.057303,0.058738,0.058026,0.057581,0.05713,0.05484  
5,0.054739,0.057993,0.058579,0.055956,0.056224,0.057952,0.055259,0.056  
067,0.057581,0.058785,0.058336,0.056772,0.056466,0.05964,0.056487,0.05  
8578,0.057828,0.061165,0.059275,0.054644,0.055064,0.057597,0.056843,0.  
055006,0.055278,0.058649,0.056569,0.055963,0.059359,0.053205,0.057911,  
0.058054,0.058576,0.0557,0.058438,0.056086,0.05583,0.058562,0.060546,0.  
.060008,0.059468,0.057148,0.059567,0.060488,0.055536,0.05881,0.057388,  
0.056419,0.0557,0.059801,0.055439,0.060005,0.059518,0.05615  
0.08142,0.080589,0.079801,0.082691,0.082048,0.078986,0.080102,0.079989  
,0.081778,0.081415,0.082117,0.079252,0.079369,0.080855,0.07607,0.08067  
7,0.078271,0.079919,0.081652,0.080651,0.20382,0.2346,0.19701,0.23471,0.  
.07881,0.079578,0.080628,0.082332,0.081226,0.080893,0.081428,0.079352,  
0.080932,0.082038,0.078432,0.083092,0.080992,0.08215,0.078516,0.36831,  
0.24394,0.22309,0.23693,0.25074,0.23141,0.23751,0.081745,0.080893,0.07  
8486,0.078425,0.07802,0.083078,0.078577,0.079281,0.079359,0.081768,0.0  
82833,0.080672,0.0813,0.080138,0.080617,0.3662,0.32457,0.21104,0.22043  
,0.22379,0.23755,0.24087,0.20517,0.20252,0.23207,0.078718,0.080922,0.0  
82985,0.078887,0.08068,0.081846,0.082176,0.081423,0.082108,0.079331,0.  
079874,0.080338,0.080417,0.079973,0.07917,0.35349,0.35136,0.39006,0.22  
563,0.23529,0.20391,0.19793,0.2187,0.22826,0.23655,0.18499,0.26508,0.0  
7886,0.081831,0.078601,0.077162,0.08232,0.080566,0.082305,0.079691,0.0  
79106,0.08006,0.078724,0.079093,0.081709,0.079366,0.078917,0.083403,0.  
34221,0.3487,0.3739,0.42078,0.20283,0.22833,0.23241,0.23722,0.22833,0.  
22802,0.21655,0.2172,0.20954,0.20629,0.081887,0.081624,0.082146,0.0781  
44,0.080998,0.081246,0.081984,0.081328,0.081002,0.07801,0.079384,0.079  
726,0.079858,0.08105,0.079928,0.080446,0.37667,0.33066,0.33678,0.35956  
,0.34181,0.34481,0.23662,0.17162,0.19161,0.20831,0.21696,0.22307,0.228  
29,0.19247,0.18288,0.24911,0.079397,0.079425,0.080915,0.083974,0.08270  
1,0.079946,0.0762,0.080352,0.081741,0.080658,0.081281,0.079335,0.07750  
7,0.080008,0.079501,0.082056,0.082108,0.36359,0.34104,0.36082,0.36871,  
0.39839,0.34329,0.22053,0.24283,0.23453,0.23623,0.22791,0.25178,0.2210  
3,0.22705,0.26425,0.21184,0.22238,0.076112,0.08073,0.078875,0.081826,0.  
.080678,0.081651,0.078129,0.081754,0.08056,0.085816,0.08342,0.079011,0.  
.080479,0.065889,0.068331,0.070085,0.080046,0.34248,0.36836,0.37064,0.  
33549,0.37787,0.38344,0.34692,0.2015,0.2135,0.23731,0.21089,0.22414,0.  
22862,0.23354,0.24954,0.25823,0.21571,0.21712,0.078629,0.083253,0.0794  
41,0.079274,0.078688,0.078114,0.079377,0.079275,0.07826,0.082122,0.080  
861,0.066695,0.066066,0.067688,0.071901,0.068825,0.063707,0.079228,0.3  
479,0.36477,0.35078,0.33911,0.37401,0.33812,0.38341,0.19974,0.17661,0.  
24245,0.22165,0.21622,0.26897,0.18036,0.19925,0.2442,0.2303,0.21598,0.  
08197,0.079428,0.078688,0.079748,0.079869,0.081901,0.080564,0.079374,0.  
.079582,0.0675,0.065906,0.066391,0.068946,0.068207,0.069218,0.069646,0.  
.068009,0.063856,0.08283,0.34805,0.35039,0.34675,0.35814,0.35112,0.379  
76,0.38351,0.226,0.21634,0.23213,0.24836,0.21078,0.22907,0.23466,0.221  
4,0.2366,0.22874,0.24174,0.21775,0.079887,0.081197,0.081021,0.080217,0.  
.081406,0.081888,0.062246,0.065534,0.067253,0.069481,0.069838,0.065076  
,0.071654,0.067,0.068399,0.071137,0.068456,0.066353,0.34858,0.36638,0.  
36679,0.35821,0.37368,0.37435,0.37636,0.22072,0.2113,0.21226,0.2513,0.  
25723,0.21415,0.21742,0.21192,0.24041,0.23137,0.17596,0.22832,0.080436  
,0.081347,0.083092,0.070709,0.067466,0.068961,0.067573,0.072134,0.0659  
53,0.069031,0.067856,0.066575,0.069801,0.070694,0.06485,0.069836,0.066

798,0.067389,0.38676,0.32733,0.3617,0.32234,0.37406,0.36991,0.35281,0.35522,0.36018,0.22085,0.25274,0.20188,0.22416,0.22508,0.19585,0.26472,0.2418,0.23453,0.21527,0.21057,0.069076,0.065862,0.067934,0.069438,0.070167,0.068411,0.069273,0.06807,0.064721,0.070345,0.0679,0.06804,0.067329,0.070665,0.067401,0.066544,0.066608,0.066878,0.37425,0.38897,0.33906,0.37555,0.38804,0.36818,0.41143,0.35024,0.37564,0.22591,0.2203,0.1608,0.17416,0.16729,0.14932,0.17588,0.15865,0.17251,0.1672,0.16397,0.070473,0.066228,0.066678,0.068189,0.068206,0.067738,0.065713,0.063056,0.066098,0.07027,0.07427,0.070699,0.067359,0.070991,0.066983,0.068393,0.060922,0.070804,0.35692,0.34196,0.38821,0.38326,0.37453,0.36815,0.36398,0.35926,0.35682,0.20701,0.17067,0.17528,0.21054,0.19626,0.16656,0.17759,0.14958,0.14947,0.16567,0.19065,0.069315,0.067528,0.071518,0.06607,0.067248,0.069787,0.067325,0.070553,0.069807,0.070225,0.066872,0.069369,0.072504,0.067401,0.071432,0.065369,0.072566,0.065262,0.38783,0.35745,0.32697,0.38114,0.40179,0.3895,0.35787,0.17287,0.23181,0.24118,0.17734,0.14047,0.1658,0.1786,0.17901,0.17998,0.17218,0.12289,0.1379,0.1613,0.06939,0.067128,0.066518,0.067766,0.069226,0.06958,0.067474,0.07006,0.068412,0.069588,0.068553,0.071211,0.069827,0.06625,0.067461,0.070803,0.06576,0.064468,0.37552,0.36748,0.3754,0.36383,0.35942,0.32763,0.18689,0.19489,0.22587,0.20008,0.25684,0.1867,0.169,0.14628,0.16051,0.15967,0.14365,0.16138,0.16518,0.16594,0.069857,0.065542,0.068925,0.069602,0.069549,0.069794,0.069208,0.069053,0.069614,0.067417,0.06786,0.069992,0.068744,0.072365,0.066657,0.071826,0.067061,0.064599,0.38695,0.363,0.38075,0.34132,0.35506,0.22077,0.20928,0.21337,0.22697,0.23439,0.24937,0.13019,0.17938,0.15811,0.15354,0.17497,0.15917,0.20146,0.17091,0.17613,0.068406,0.066261,0.063916,0.067124,0.064781,0.067555,0.068258,0.068683,0.069868,0.072147,0.070399,0.068721,0.06678,0.064559,0.066811,0.066612,0.069879,0.068756,0.34633,0.36739,0.4011,0.20716,0.19934,0.19781,0.21798,0.20599,0.20107,0.22561,0.21257,0.18416,0.17939,0.16675,0.16917,0.16907,0.16885,0.1829,0.16142,0.17441,0.070019,0.070828,0.066699,0.069043,0.067291,0.071062,0.071318,0.07082,0.066736,0.071077,0.068859,0.064463,0.069001,0.070812,0.065417,0.066573,0.069156,0.06971,0.35168,0.20015,0.22616,0.22179,0.21712,0.20319,0.22476,0.1946,0.19775,0.204,0.19002,0.1713,0.14964,0.17696,0.15683,0.16494,0.156,0.15736,0.17145,0.069245,0.062536,0.069326,0.070791,0.07208,0.064624,0.067767,0.067109,0.0713,0.068158,0.06709,0.06757,0.072682,0.068443,0.068619,0.067503,0.066744,0.055593,0.19797,0.24054,0.26593,0.19808,0.18556,0.20712,0.19038,0.19788,0.25559,0.20345,0.15885,0.18064,0.15158,0.18029,0.15412,0.15923,0.1555,0.16938,0.16276,0.067195,0.066643,0.066593,0.069604,0.067199,0.070023,0.070365,0.067651,0.069304,0.063805,0.066492,0.067562,0.07055,0.068832,0.065491,0.071522,0.067791,0.056116,0.22277,0.19409,0.19167,0.20578,0.22329,0.20047,0.20859,0.2056,0.21436,0.22842,0.15732,0.17268,0.16732,0.16456,0.16628,0.1736,0.15582,0.16245,0.067406,0.071769,0.071294,0.069976,0.067877,0.071211,0.068237,0.068946,0.071994,0.070225,0.068519,0.06632,0.068453,0.068615,0.064986,0.074135,0.070411,0.075753,0.057764,0.22014,0.2081,0.19529,0.17597,0.22332,0.21235,0.20795,0.24961,0.19403,0.20194,0.16813,0.17837,0.15539,0.18184,0.1751,0.17206,0.19324,0.17577,0.070814,0.066905,0.064225,0.070059,0.065625,0.067896,0.066965,0.067743,0.06724,0.070102,0.070432,0.068195,0.067407,0.067233,0.069187,0.070157,0.069579,0.057414,0.059295,0.056615,0.20236,0.19283,0.2036,0.19966,0.20698,0.33429,0.24518,0.22903,0.20403,0.17368,0.15406,0.1704,0.16544,0.19143,0.16947,0.066975,0.066167,0.064949,0.069454,0.065

568,0.066041,0.063284,0.069821,0.063486,0.066539,0.068538,0.069241,0.0  
68274,0.064332,0.068537,0.068813,0.071588,0.072271,0.056814,0.056748,0  
.058157,0.055204,0.20631,0.2196,0.20036,0.20008,0.20999,0.22347,0.1827  
5,0.27599,0.21086,0.15617,0.15461,0.16813,0.069213,0.07045,0.065996,0.  
068972,0.066228,0.068929,0.069323,0.067186,0.069927,0.067187,0.067483,  
0.068749,0.065263,0.069296,0.063452,0.066369,0.069296,0.065867,0.06764  
6,0.070366,0.055044,0.058322,0.056032,0.054792,0.055747,0.057447,0.201  
58,0.19002,0.20731,0.24055,0.20894,0.22494,0.23621,0.2108,0.06847,0.06  
689,0.070996,0.067559,0.070233,0.06677,0.064725,0.06901,0.068613,0.066  
678,0.072915,0.07156,0.067748,0.066319,0.069312,0.066347,0.06626,0.070  
062,0.070773,0.065606,0.067974,0.067808,0.066653,0.05632,0.056709,0.05  
8839,0.054622,0.054458,0.062392,0.22191,0.17732,0.19041,0.18827,0.2072  
6,0.0559,0.055046,0.072859,0.070937,0.066222,0.071411,0.069024,0.06790  
8,0.068101,0.06734,0.067606,0.065846,0.067246,0.067278,0.067831,0.0694  
48,0.06903,0.068015,0.06622,0.066412,0.069028,0.06691,0.07138,0.056699  
,0.054403,0.056865,0.055311,0.055832,0.053006,0.054335,0.056371,0.0538  
19,0.057975,0.2827,0.24693,0.055004,0.060663,0.056551,0.054761,0.06223  
7,0.07038,0.070034,0.068836,0.070563,0.067558,0.066907,0.068113,0.0659  
11,0.066158,0.055973,0.065502,0.066202,0.065096,0.064225,0.073377,0.06  
8427,0.068803,0.070948,0.056614,0.054058,0.055797,0.057122,0.0567,0.05  
7534,0.056567,0.057185,0.055602,0.056773,0.054687,0.056625,0.054678,0.  
056779,0.052217,0.056301,0.05894,0.06976,0.070003,0.068287,0.066795,0.  
064706,0.072984,0.070586,0.066454,0.066808,0.070247,0.066669,0.065682,  
0.068922,0.072473,0.069809,0.067361,0.057724,0.055508,0.058145,0.05785  
,0.05769,0.058567,0.059623,0.056406,0.053989,0.05601,0.05718,0.056774,  
0.054539,0.055991,0.05561,0.056978,0.055795,0.055439,0.055861,0.067725  
,0.070801,0.069503,0.068686,0.069266,0.07017,0.067198,0.069888,0.06929  
,0.066859,0.067616,0.067362,0.068129,0.056375,0.054133,0.056232,0.0577  
52,0.056095,0.05683,0.05365,0.058576,0.05921,0.058422,0.056137,0.05391  
4,0.055955,0.055331,0.054943,0.057809,0.058019,0.054732,0.0558,0.05461  
3,0.057069,0.067337,0.068447,0.0691,0.071124,0.070586,0.066947,0.07089  
7,0.066013,0.068972,0.057858,0.057973,0.056606,0.054243,0.057569,0.056  
092,0.056113,0.056508,0.055868,0.053798,0.055455,0.055422,0.056959,0.0  
54636,0.05561,0.059068,0.053856,0.057066,0.055722,0.057447,0.055103,0.  
054414,0.055089,0.058483,0.055864,0.068233,0.069919,0.067023,0.066572,  
0.05345,0.057991,0.055158,0.057035,0.054235,0.056592,0.05667,0.053991,  
0.054017,0.056303,0.0542,0.056485,0.054911,0.053912,0.057031,0.05341,0  
.057135,0.057331,0.05536,0.055908,0.056768,0.054015,0.056394,0.057362,  
0.057353,0.056151,0.056347,0.05604,0.05889,0.057106,0.054585,0.05828,0  
.058399,0.056499,0.051828,0.059666,0.057558,0.058596,0.056439,0.056978  
,0.057106,0.054865,0.058102,0.057614,0.053952,0.055184,0.056958,0.0566  
23,0.055725,0.059877,0.055667,0.059456,0.059173,0.059852,0.058942,0.05  
7317,0.058574,0.05759,0.053144,0.058008,0.054391,0.055667,0.058966,0.0  
53724,0.055208,0.056285,0.057082,0.058469,0.056438,0.057003,0.056241,0  
.054106,0.053611,0.057284,0.057424,0.055376,0.056608,0.05699,0.054052,  
0.052614,0.056353,0.055508,0.05633,0.054701,0.051594,0.055617,0.058241  
,0.058534,0.05544,0.055963,0.05704,0.056974,0.05593,0.055053,0.055423,  
0.057699,0.054727,0.057139,0.056583,0.058904,0.05553,0.054742,0.057613  
,0.055228,0.057038,0.057611,0.057486,0.055918,0.056623,0.055522,0.0610  
53,0.058244,0.054243,0.056678,0.057208,0.055625,0.056653,0.053353,0.05  
9633,0.05782,0.057325,0.060048,0.055824,0.055648,0.054293,0.058461,0.0  
53958,0.056893,0.054682,0.057399,0.056233,0.059323,0.052518,0.056535,0

.054644,0.057054,0.058796,0.057059,0.056286,0.058347,0.053293,0.05465,  
0.056642,0.056919,0.055237,0.056478,0.056446,0.055276,0.054816,0.05479  
2,0.057994,0.057474,0.055319,0.055233,0.058294,0.054576,0.057556,0.057  
555,0.060706,0.058371,0.05453,0.055079,0.056425,0.056065,0.055343,0.05  
3545,0.057706,0.05532,0.054779,0.058744,0.051275,0.055949,0.057131,0.0  
58465,0.054664,0.05805,0.055054,0.055582,0.057474,0.057745,0.059429,0.  
05854,0.055115,0.05879,0.059095,0.054379,0.057108,0.057214,0.05516,0.0  
53647,0.058768,0.054859,0.059782,0.058695,0.056641  
0.079075,0.077751,0.075799,0.08079,0.07996,0.076712,0.077389,0.07724,0  
.077512,0.078822,0.078881,0.076278,0.077164,0.079143,0.074476,0.077916  
,0.075556,0.077535,0.079282,0.077271,0.20143,0.23213,0.18836,0.23376,0  
.076671,0.07716,0.078107,0.078828,0.078188,0.077964,0.078687,0.076411,  
0.076583,0.078905,0.075724,0.079984,0.078348,0.079505,0.076294,0.34647  
,0.23567,0.22516,0.23552,0.23769,0.22498,0.23186,0.078949,0.07791,0.07  
6263,0.076472,0.07561,0.079669,0.075927,0.076644,0.076722,0.079424,0.0  
80433,0.07902,0.078497,0.077319,0.07757,0.3692,0.33744,0.21064,0.21758  
,0.22705,0.23834,0.24051,0.20497,0.2018,0.21888,0.075985,0.076931,0.07  
9987,0.076037,0.076961,0.079826,0.079843,0.079306,0.078352,0.077828,0.  
077468,0.077238,0.078318,0.076552,0.076978,0.35977,0.34553,0.37627,0.2  
2336,0.22788,0.19984,0.19539,0.21485,0.23073,0.23654,0.18179,0.26102,0  
.077082,0.078631,0.076258,0.074269,0.078388,0.077739,0.079021,0.078537  
,0.077364,0.077872,0.076607,0.076036,0.078378,0.076704,0.077845,0.0814  
76,0.34498,0.32806,0.37823,0.40864,0.20023,0.22396,0.23295,0.23805,0.2  
245,0.22604,0.21497,0.21115,0.20947,0.20504,0.079044,0.078783,0.078996  
,0.075953,0.077455,0.078611,0.078975,0.078984,0.078446,0.075373,0.0762  
44,0.076371,0.077977,0.078017,0.077169,0.076979,0.3641,0.33982,0.33992  
,0.35556,0.3504,0.3645,0.23745,0.16907,0.18442,0.20172,0.20868,0.21721  
,0.22698,0.19396,0.17346,0.2516,0.077532,0.076413,0.077706,0.081713,0.  
079964,0.076436,0.073527,0.077318,0.077823,0.078342,0.078045,0.077158,  
0.074139,0.077091,0.076234,0.079005,0.079708,0.35469,0.33873,0.35169,0  
.36948,0.39333,0.33524,0.21729,0.23799,0.2367,0.23702,0.23109,0.24476,  
0.21344,0.23051,0.25949,0.21072,0.22509,0.073775,0.077147,0.07504,0.07  
8545,0.077222,0.078003,0.076208,0.079781,0.076667,0.081533,0.080434,0.  
076148,0.078597,0.064123,0.065765,0.068616,0.077504,0.34809,0.35149,0.  
36903,0.34834,0.37917,0.36926,0.34018,0.19978,0.20992,0.23751,0.20637,  
0.22255,0.22388,0.23947,0.24908,0.25618,0.21172,0.21679,0.07535,0.0798  
38,0.07689,0.075885,0.07662,0.075205,0.076527,0.075885,0.075071,0.0791  
65,0.077887,0.065865,0.064209,0.065737,0.069396,0.066327,0.063195,0.07  
6946,0.33777,0.36283,0.3383,0.34633,0.36637,0.33536,0.38637,0.20202,0.  
17327,0.24315,0.21558,0.21159,0.26224,0.18439,0.19535,0.2297,0.22689,0  
.2042,0.078457,0.076946,0.076203,0.076982,0.077336,0.079213,0.077686,0  
.077161,0.076834,0.065669,0.064966,0.064276,0.067714,0.06608,0.067414,  
0.067101,0.066937,0.062274,0.07934,0.32967,0.33505,0.33852,0.35634,0.3  
5311,0.3885,0.38358,0.22333,0.21855,0.2358,0.24351,0.20446,0.22535,0.2  
2387,0.22428,0.23889,0.22025,0.24153,0.21729,0.077582,0.079157,0.07860  
1,0.07874,0.0785,0.079268,0.06291,0.063628,0.065319,0.067746,0.068656,  
0.06251,0.069576,0.064315,0.066705,0.069139,0.067127,0.06487,0.35147,0  
.35016,0.36147,0.35498,0.36948,0.37588,0.37737,0.217,0.20168,0.21028,0  
.2538,0.25735,0.2087,0.21161,0.2103,0.23507,0.23116,0.17484,0.21852,0.  
078548,0.078789,0.079051,0.06963,0.066178,0.067104,0.066138,0.070204,0  
.064582,0.067962,0.06575,0.06527,0.06759,0.069076,0.063848,0.068313,0.  
065564,0.066088,0.38626,0.32582,0.36653,0.31446,0.36237,0.37663,0.3603

9, 0.33967, 0.35812, 0.21827, 0.25377, 0.20111, 0.22241, 0.21345, 0.19181, 0.25  
995, 0.24032, 0.23089, 0.21124, 0.20385, 0.067452, 0.064197, 0.065023, 0.06720  
3, 0.067826, 0.067939, 0.067509, 0.065755, 0.063119, 0.068846, 0.066091, 0.067  
663, 0.065255, 0.06917, 0.065753, 0.0651, 0.065529, 0.065386, 0.37272, 0.38886  
, 0.3537, 0.37263, 0.38313, 0.36478, 0.40472, 0.33919, 0.37084, 0.22708, 0.2142  
4, 0.16342, 0.17337, 0.161, 0.14575, 0.17594, 0.15491, 0.17028, 0.16838, 0.1630  
8, 0.068271, 0.063031, 0.065596, 0.066325, 0.065871, 0.066695, 0.063913, 0.061  
826, 0.064884, 0.071307, 0.071572, 0.068868, 0.066271, 0.069829, 0.064455, 0.0  
65548, 0.060371, 0.069375, 0.35755, 0.33744, 0.37128, 0.38735, 0.37375, 0.3593  
4, 0.36769, 0.36038, 0.34589, 0.20844, 0.16936, 0.17296, 0.20915, 0.19263, 0.16  
365, 0.17833, 0.14809, 0.14537, 0.16516, 0.18258, 0.067109, 0.066189, 0.069967  
, 0.065163, 0.065758, 0.067191, 0.06562, 0.069342, 0.06881, 0.067687, 0.065589  
, 0.066614, 0.070998, 0.065224, 0.070877, 0.064038, 0.07044, 0.064652, 0.36957  
, 0.35627, 0.32167, 0.38567, 0.39858, 0.37464, 0.36401, 0.16512, 0.2415, 0.2397  
4, 0.16965, 0.13757, 0.16036, 0.17144, 0.1767, 0.17634, 0.16357, 0.12303, 0.137  
86, 0.16034, 0.068513, 0.064268, 0.065296, 0.067627, 0.068355, 0.068457, 0.066  
799, 0.068456, 0.066564, 0.067921, 0.066185, 0.070314, 0.067929, 0.064495, 0.0  
66242, 0.068428, 0.063635, 0.063096, 0.36948, 0.35073, 0.37417, 0.37678, 0.358  
15, 0.33291, 0.18235, 0.19357, 0.22616, 0.19933, 0.24904, 0.18679, 0.16955, 0.1  
4777, 0.15943, 0.1548, 0.14594, 0.15913, 0.1616, 0.16104, 0.067174, 0.063466, 0  
.06676, 0.068177, 0.067745, 0.067153, 0.068292, 0.066696, 0.067875, 0.066458,  
0.064859, 0.068057, 0.06541, 0.070237, 0.065361, 0.069829, 0.065798, 0.062031  
, 0.38847, 0.34778, 0.38494, 0.33486, 0.35787, 0.21259, 0.20298, 0.20749, 0.224  
71, 0.23291, 0.24569, 0.12561, 0.17428, 0.15884, 0.15649, 0.17545, 0.15756, 0.1  
9263, 0.16459, 0.17474, 0.067137, 0.065433, 0.063193, 0.065258, 0.063356, 0.06  
5611, 0.066701, 0.067349, 0.0661, 0.071039, 0.067735, 0.067862, 0.064566, 0.06  
3534, 0.066011, 0.063508, 0.067238, 0.067693, 0.33729, 0.369, 0.39024, 0.20383  
, 0.19653, 0.19883, 0.21477, 0.20544, 0.19468, 0.22117, 0.21463, 0.17615, 0.167  
91, 0.16402, 0.16521, 0.16971, 0.16723, 0.18515, 0.16076, 0.16491, 0.068405, 0.  
069859, 0.064853, 0.067061, 0.064817, 0.069085, 0.069419, 0.068573, 0.065325,  
0.06803, 0.06763, 0.062749, 0.066821, 0.068875, 0.064293, 0.064246, 0.066371,  
0.065924, 0.36802, 0.18388, 0.2248, 0.20964, 0.22252, 0.19836, 0.22963, 0.1940  
4, 0.19511, 0.20442, 0.18671, 0.16563, 0.15001, 0.17136, 0.15633, 0.16045, 0.14  
781, 0.15656, 0.17231, 0.067004, 0.061571, 0.068666, 0.06961, 0.070449, 0.0626  
81, 0.066496, 0.064505, 0.069932, 0.065632, 0.064783, 0.063785, 0.070358, 0.06  
7263, 0.066654, 0.06715, 0.064626, 0.05607, 0.1913, 0.23326, 0.26664, 0.19068,  
0.18173, 0.20627, 0.19313, 0.19664, 0.25048, 0.20316, 0.15326, 0.17774, 0.1479  
4, 0.17813, 0.15175, 0.16157, 0.15281, 0.17153, 0.15786, 0.065235, 0.065833, 0.  
064797, 0.066819, 0.064776, 0.067749, 0.068391, 0.066418, 0.067439, 0.062699,  
0.065463, 0.066615, 0.069797, 0.066841, 0.062485, 0.069544, 0.066985, 0.05521  
2, 0.22417, 0.1927, 0.19812, 0.20468, 0.21738, 0.19918, 0.20461, 0.19787, 0.210  
9, 0.23085, 0.15504, 0.17249, 0.17187, 0.16861, 0.16695, 0.17199, 0.15353, 0.15  
816, 0.066456, 0.069787, 0.069776, 0.068553, 0.065908, 0.068711, 0.0665, 0.067  
569, 0.069263, 0.068574, 0.067729, 0.063766, 0.06699, 0.066686, 0.06433, 0.072  
929, 0.067859, 0.0734, 0.056424, 0.21272, 0.20184, 0.19088, 0.18006, 0.22187, 0  
.20468, 0.20925, 0.24482, 0.19377, 0.20911, 0.1623, 0.17952, 0.15053, 0.17859,  
0.17164, 0.16848, 0.19228, 0.17456, 0.068625, 0.06507, 0.06363, 0.069588, 0.06  
4033, 0.066837, 0.064895, 0.066066, 0.06543, 0.067229, 0.068453, 0.065666, 0.0  
65305, 0.066136, 0.066526, 0.069844, 0.068978, 0.057336, 0.059172, 0.055849, 0  
.19803, 0.19215, 0.20654, 0.19766, 0.20352, 0.32817, 0.23807, 0.22926, 0.21257  
, 0.1676, 0.1492, 0.17375, 0.16456, 0.1847, 0.17426, 0.065425, 0.06295, 0.06426  
8, 0.066386, 0.064113, 0.063724, 0.060962, 0.067363, 0.063569, 0.064285, 0.067

653,0.068069,0.068529,0.061852,0.067775,0.067929,0.068834,0.070079,0.0  
56033,0.056302,0.055698,0.054421,0.20549,0.21957,0.20056,0.20124,0.214  
75,0.21921,0.18555,0.27095,0.20279,0.15694,0.15194,0.16599,0.067319,0.  
068042,0.064502,0.066649,0.065049,0.068003,0.068256,0.064213,0.068075,  
0.064856,0.065371,0.066933,0.063476,0.067645,0.063312,0.064071,0.06811  
4,0.065305,0.064862,0.069707,0.054258,0.057248,0.056003,0.053639,0.055  
036,0.055187,0.19562,0.17954,0.2026,0.2448,0.20886,0.22974,0.23455,0.2  
0785,0.067914,0.064944,0.069826,0.06764,0.067845,0.065323,0.063762,0.0  
67406,0.066756,0.065781,0.070376,0.070248,0.065862,0.064333,0.067918,0.  
.065737,0.064431,0.066903,0.070695,0.063853,0.066591,0.065245,0.065328  
,0.054665,0.056421,0.058328,0.05359,0.053501,0.061496,0.22469,0.17616,  
0.19522,0.19111,0.204,0.055123,0.054304,0.069817,0.068187,0.065049,0.0  
6924,0.06725,0.065203,0.066304,0.065362,0.067129,0.064556,0.065432,0.0  
64914,0.066342,0.068163,0.067839,0.067373,0.063594,0.065432,0.066861,0.  
.065682,0.069801,0.055619,0.053601,0.056206,0.054394,0.05476,0.051915,  
0.053646,0.05682,0.052896,0.057085,0.28626,0.24192,0.055157,0.060346,0.  
.055693,0.054347,0.060201,0.067414,0.068058,0.067316,0.069442,0.066571  
,0.066539,0.066165,0.064577,0.065226,0.055732,0.063484,0.064925,0.0646  
74,0.063757,0.071187,0.066888,0.066933,0.069868,0.056146,0.053778,0.05  
5804,0.055498,0.056552,0.057921,0.056448,0.058427,0.053831,0.05569,0.0  
54134,0.055453,0.055802,0.055875,0.051303,0.055399,0.058344,0.068638,0.  
.067395,0.064715,0.066403,0.063034,0.071143,0.069303,0.066274,0.06677,  
0.068442,0.06411,0.064592,0.066944,0.06984,0.067366,0.066396,0.056491,  
0.056467,0.056322,0.056307,0.057819,0.058915,0.060436,0.05395,0.053328  
,0.055689,0.054464,0.056613,0.05321,0.056485,0.054933,0.055862,0.05443  
2,0.053762,0.056367,0.067466,0.068725,0.068602,0.067666,0.067612,0.068  
064,0.064463,0.068639,0.067346,0.064767,0.065306,0.066493,0.067495,0.0  
57529,0.052566,0.056196,0.056729,0.055115,0.056395,0.053388,0.058324,0.  
.057078,0.057206,0.05497,0.052933,0.05652,0.055036,0.054688,0.057407,0.  
.055745,0.053772,0.05569,0.05292,0.056698,0.065425,0.066338,0.067286,0.  
.068164,0.067732,0.066462,0.068,0.065729,0.066572,0.05654,0.057071,0.0  
55324,0.055317,0.056424,0.054518,0.05669,0.055753,0.055474,0.053265,0.  
054099,0.05438,0.054704,0.054192,0.055918,0.056545,0.053176,0.056749,0.  
.054247,0.057121,0.054573,0.051203,0.054169,0.057544,0.05497,0.066268,  
0.068972,0.065783,0.06571,0.053532,0.056356,0.053578,0.057151,0.054491  
,0.054978,0.054934,0.052644,0.052814,0.056535,0.054607,0.05573,0.05267  
,0.054259,0.056866,0.051337,0.057766,0.055848,0.053413,0.0558,0.056911  
,0.053641,0.055556,0.056395,0.057217,0.056237,0.055169,0.056261,0.0577  
56,0.056982,0.054218,0.056105,0.057877,0.055383,0.049994,0.057734,0.05  
7157,0.057949,0.056237,0.05837,0.056343,0.05347,0.057008,0.056037,0.05  
2977,0.054486,0.056514,0.056742,0.054371,0.058793,0.054952,0.058101,0.  
05815,0.05959,0.058796,0.05636,0.057658,0.056151,0.052147,0.05749,0.05  
5466,0.054974,0.05821,0.052477,0.054924,0.056534,0.055971,0.057281,0.0  
5566,0.056811,0.05553,0.054515,0.052455,0.056111,0.05594,0.053561,0.05  
5872,0.055909,0.055151,0.052001,0.055658,0.054138,0.053735,0.054247,0.  
050974,0.055217,0.05671,0.058103,0.055617,0.055013,0.056988,0.056284,0.  
.054872,0.054818,0.054336,0.055687,0.055145,0.055858,0.055446,0.057804  
,0.054736,0.053429,0.057371,0.054255,0.056099,0.055797,0.056082,0.0554  
05,0.055285,0.054707,0.060277,0.058579,0.053453,0.056797,0.055911,0.05  
4737,0.056506,0.052002,0.060009,0.057016,0.055758,0.059525,0.055028,0.  
055069,0.052884,0.057397,0.052301,0.055902,0.053746,0.056511,0.056007,  
0.057798,0.052182,0.05579,0.053028,0.056952,0.056025,0.055327,0.055061

,0.055884,0.053799,0.053549,0.05618,0.054112,0.053384,0.055936,0.05536  
1,0.055321,0.054098,0.055112,0.058583,0.057265,0.053739,0.054643,0.057  
825,0.054637,0.057241,0.056287,0.059149,0.057608,0.054153,0.054601,0.0  
55267,0.055135,0.056189,0.052845,0.057195,0.052895,0.052451,0.057333,0  
.052026,0.054783,0.056829,0.057937,0.053302,0.057915,0.054061,0.055454  
,0.057759,0.057722,0.058358,0.057632,0.055327,0.057746,0.05685,0.05454  
8,0.054884,0.056724,0.053234,0.053316,0.058127,0.054384,0.058532,0.059  
136,0.055618  
0.076319,0.075385,0.073262,0.077659,0.07723,0.074663,0.076677,0.074838  
,0.076052,0.076385,0.07539,0.074584,0.075284,0.077593,0.073231,0.07502  
2,0.074567,0.075292,0.077259,0.075862,0.19428,0.23058,0.18922,0.21948,  
0.074055,0.074208,0.075115,0.076089,0.076482,0.076499,0.076647,0.07449  
,0.075048,0.076597,0.074844,0.077757,0.075081,0.077087,0.074339,0.3352  
,0.22563,0.21216,0.2343,0.22735,0.22106,0.22883,0.076206,0.075502,0.07  
4431,0.074311,0.073693,0.076172,0.074441,0.074219,0.074401,0.07575,0.0  
77852,0.075696,0.076376,0.075429,0.073967,0.36676,0.33535,0.20207,0.21  
388,0.22356,0.23344,0.23896,0.20078,0.19943,0.22212,0.073655,0.075421,  
0.077853,0.074599,0.075432,0.077846,0.077248,0.076754,0.075673,0.07486  
3,0.075237,0.073654,0.075665,0.074094,0.074399,0.35236,0.35206,0.37393  
,0.21983,0.22624,0.19488,0.18569,0.21279,0.22557,0.23222,0.17811,0.254  
11,0.074477,0.076728,0.074234,0.072147,0.076868,0.075839,0.076363,0.07  
7233,0.074042,0.076688,0.075077,0.074486,0.076705,0.074084,0.07556,0.0  
797,0.34913,0.31701,0.3804,0.4014,0.19949,0.22058,0.22864,0.23395,0.21  
852,0.22686,0.21317,0.2102,0.21175,0.20706,0.076574,0.077346,0.077213,  
0.074378,0.075057,0.076953,0.076472,0.077062,0.07623,0.071892,0.074685  
,0.075165,0.075128,0.07598,0.074106,0.074526,0.36214,0.33676,0.34556,0  
.36029,0.34277,0.34496,0.23556,0.16279,0.18202,0.19842,0.20802,0.21892  
,0.22707,0.18747,0.16943,0.24772,0.07561,0.074039,0.07588,0.078743,0.0  
77316,0.07478,0.072127,0.075594,0.075271,0.076595,0.075257,0.075086,0.  
071601,0.075082,0.074279,0.07628,0.077955,0.35369,0.34785,0.33816,0.36  
928,0.3841,0.32275,0.21997,0.23278,0.22729,0.23382,0.22191,0.25213,0.2  
0511,0.22455,0.26649,0.20445,0.22799,0.072969,0.075239,0.073764,0.0765  
36,0.075388,0.075652,0.074259,0.077669,0.074508,0.078791,0.078852,0.07  
495,0.075843,0.063004,0.06431,0.068176,0.075567,0.35028,0.34448,0.3692  
4,0.34377,0.37964,0.36546,0.33996,0.19948,0.21393,0.23185,0.20862,0.21  
336,0.22368,0.24126,0.24151,0.25034,0.21055,0.21134,0.073345,0.078511,  
0.074001,0.073525,0.075494,0.072811,0.074142,0.073768,0.073824,0.07610  
7,0.074818,0.064753,0.061631,0.065557,0.068771,0.065699,0.062368,0.074  
546,0.34672,0.3642,0.3339,0.33421,0.36447,0.34479,0.38214,0.19506,0.17  
335,0.24189,0.21722,0.20969,0.25847,0.18077,0.19554,0.22916,0.22026,0.  
20466,0.075164,0.076364,0.074683,0.075132,0.076231,0.076554,0.076457,0  
.074323,0.073781,0.066083,0.063997,0.063056,0.066373,0.063521,0.066415  
,0.065635,0.065006,0.062201,0.077183,0.34481,0.35148,0.33341,0.33648,0  
.33479,0.38377,0.3786,0.22197,0.21678,0.23725,0.23701,0.19973,0.22109,  
0.22905,0.22765,0.23797,0.21997,0.24511,0.2151,0.075341,0.076246,0.075  
547,0.076916,0.075931,0.077216,0.062473,0.062671,0.06445,0.06769,0.066  
812,0.061599,0.068153,0.063111,0.065393,0.068661,0.066271,0.062073,0.3  
5618,0.35767,0.35623,0.36654,0.35699,0.39075,0.38098,0.21618,0.19624,0  
.20731,0.24985,0.24644,0.19964,0.20439,0.21004,0.23035,0.2301,0.17207,  
0.21146,0.075531,0.075814,0.077103,0.068958,0.065649,0.065006,0.065222  
,0.068963,0.063681,0.066684,0.064649,0.064672,0.066246,0.06752,0.06153  
,0.065441,0.064757,0.06434,0.3802,0.33166,0.37041,0.3226,0.35618,0.367



15,0.3306,0.33682,0.36886,0.21075,0.2372,0.20258,0.2164,0.20716,0.1946  
9,0.26203,0.24178,0.22788,0.21647,0.19764,0.067195,0.063371,0.063738,0  
.066562,0.066393,0.067681,0.06623,0.063452,0.062548,0.067195,0.065175,  
0.065851,0.064121,0.065719,0.065218,0.064893,0.064809,0.064204,0.36779  
,0.37611,0.34548,0.36761,0.37424,0.36971,0.40361,0.35278,0.36789,0.219  
76,0.21481,0.16232,0.16922,0.15891,0.14395,0.17164,0.15135,0.16791,0.1  
6804,0.1631,0.066924,0.060017,0.062963,0.065214,0.065357,0.066257,0.06  
2251,0.060457,0.063768,0.069669,0.069322,0.066439,0.065532,0.06781,0.0  
635,0.064717,0.059075,0.066011,0.35463,0.32117,0.37393,0.38483,0.37511  
,0.35038,0.36314,0.35966,0.34113,0.20343,0.17402,0.17456,0.19828,0.187  
05,0.16492,0.17823,0.14056,0.14645,0.1616,0.18635,0.066502,0.064142,0.  
068977,0.064208,0.064261,0.065841,0.064078,0.068666,0.06646,0.065711,0  
.065132,0.06701,0.06846,0.064524,0.068337,0.063251,0.068636,0.063066,0  
.36009,0.36288,0.31827,0.37132,0.39147,0.37038,0.35984,0.1643,0.23902,  
0.23682,0.16872,0.1355,0.15803,0.17021,0.17222,0.17016,0.15756,0.1221,  
0.13381,0.16091,0.067095,0.064186,0.065151,0.06745,0.064781,0.067988,0  
.065669,0.067795,0.064316,0.067311,0.064853,0.070202,0.065515,0.062205  
,0.065322,0.067827,0.061587,0.063194,0.37778,0.34086,0.37415,0.37215,0  
.36154,0.3325,0.18657,0.19147,0.22913,0.19724,0.25818,0.18781,0.16693,  
0.14429,0.15523,0.15226,0.14435,0.16118,0.15937,0.16105,0.064897,0.061  
728,0.064607,0.066495,0.066137,0.065618,0.066962,0.06626,0.065976,0.06  
5539,0.06278,0.066589,0.063398,0.069652,0.063633,0.067381,0.064947,0.0  
61844,0.3823,0.3561,0.37673,0.32612,0.36445,0.20712,0.19606,0.19958,0.  
22515,0.22447,0.23648,0.12234,0.17739,0.15385,0.15591,0.18025,0.15516,  
0.19335,0.1637,0.1752,0.064761,0.063316,0.062586,0.063258,0.061234,0.0  
64866,0.064931,0.066317,0.064294,0.068218,0.066924,0.066381,0.063535,0  
.063354,0.063813,0.062465,0.066386,0.066411,0.3412,0.36235,0.39332,0.2  
0433,0.19625,0.20065,0.2068,0.20858,0.18652,0.21911,0.21515,0.17141,0.  
16689,0.16718,0.16917,0.17295,0.16512,0.17728,0.15942,0.16798,0.065836  
,0.067646,0.062977,0.06631,0.063831,0.066143,0.066733,0.06674,0.064437  
,0.06613,0.066568,0.06207,0.065993,0.068548,0.063037,0.063558,0.065718  
,0.064282,0.37279,0.18605,0.22731,0.20503,0.2203,0.1928,0.22658,0.2000  
1,0.19107,0.20919,0.18646,0.16499,0.1482,0.16912,0.15409,0.16065,0.146  
11,0.15796,0.16956,0.06519,0.061428,0.066977,0.067028,0.067604,0.06294  
,0.065227,0.063155,0.068029,0.065164,0.062751,0.062552,0.067621,0.0670  
7,0.064757,0.066139,0.062763,0.055973,0.18961,0.22542,0.27285,0.19018,  
0.18099,0.20006,0.19986,0.19406,0.25031,0.20839,0.15273,0.17046,0.1473  
,0.16974,0.14722,0.15926,0.15288,0.1673,0.15385,0.064354,0.064978,0.06  
286,0.06479,0.064417,0.066275,0.066537,0.065396,0.065086,0.061628,0.06  
417,0.065244,0.068214,0.065044,0.061514,0.067431,0.064692,0.054845,0.2  
2955,0.18991,0.19504,0.2006,0.21892,0.20877,0.19473,0.19639,0.19951,0.  
22396,0.15811,0.17471,0.17135,0.16504,0.16483,0.17159,0.1483,0.1514,0.  
065531,0.068219,0.068276,0.066026,0.0652,0.066565,0.064991,0.065411,0.  
067891,0.066765,0.066328,0.064257,0.065493,0.064537,0.062554,0.071857,  
0.065536,0.072164,0.056415,0.20743,0.20658,0.19309,0.16897,0.21364,0.2  
1058,0.20961,0.24534,0.19551,0.20771,0.15936,0.1773,0.1489,0.17762,0.1  
683,0.16402,0.19295,0.17076,0.06595,0.063744,0.06326,0.068859,0.063912  
,0.066394,0.063297,0.064422,0.064124,0.066532,0.066422,0.06535,0.06333  
4,0.063988,0.065289,0.067454,0.069221,0.058631,0.057532,0.055535,0.197  
17,0.19848,0.20062,0.20581,0.20538,0.32203,0.23451,0.22918,0.206,0.166  
46,0.1506,0.17359,0.16307,0.18301,0.172,0.063744,0.061744,0.062868,0.0  
65463,0.063117,0.062924,0.060448,0.066683,0.062358,0.063766,0.066846,0

.06617,0.066664,0.059549,0.065304,0.065673,0.067852,0.068336,0.05542,0.054318,0.055456,0.055582,0.1986,0.21155,0.20279,0.19935,0.21435,0.21187,0.18545,0.26629,0.20425,0.15735,0.15228,0.15938,0.067325,0.066227,0.063106,0.065739,0.063997,0.066438,0.067362,0.062914,0.066288,0.063415,0.063606,0.065965,0.061051,0.067378,0.062021,0.062527,0.067435,0.063757,0.064559,0.068908,0.054782,0.056309,0.055113,0.053745,0.054041,0.054293,0.19851,0.18249,0.20218,0.2335,0.20442,0.22889,0.2255,0.20627,0.067523,0.064423,0.06891,0.066679,0.066264,0.065074,0.062962,0.066454,0.06578,0.06406,0.069495,0.069016,0.065259,0.062692,0.066779,0.065133,0.064352,0.066102,0.06979,0.062686,0.066084,0.064688,0.063454,0.056111,0.05547,0.056222,0.052664,0.052997,0.060911,0.22904,0.1807,0.20044,0.18927,0.20284,0.055899,0.054006,0.067241,0.065414,0.064102,0.065722,0.065758,0.064511,0.065906,0.063714,0.065559,0.063841,0.064601,0.063437,0.065036,0.066926,0.065777,0.065721,0.062299,0.063624,0.066128,0.065338,0.068837,0.056302,0.053425,0.055439,0.053086,0.055508,0.051515,0.052638,0.056756,0.051741,0.055647,0.28206,0.23882,0.054048,0.058641,0.055224,0.054981,0.059802,0.06736,0.066276,0.066407,0.066318,0.066135,0.066167,0.064346,0.063884,0.063585,0.054284,0.06262,0.062902,0.063201,0.062748,0.070621,0.06477,0.064694,0.067454,0.055187,0.053466,0.055933,0.054843,0.057082,0.057888,0.056152,0.0575,0.0532,0.054915,0.053248,0.054388,0.056045,0.055561,0.052518,0.054175,0.057943,0.067614,0.066938,0.061561,0.065149,0.062516,0.069185,0.06713,0.065197,0.064997,0.06702,0.064498,0.063769,0.066569,0.067575,0.065611,0.064374,0.058413,0.05608,0.055429,0.05656,0.057163,0.057424,0.060516,0.053832,0.053224,0.056617,0.055173,0.053813,0.052409,0.053229,0.054461,0.055076,0.054413,0.053866,0.057019,0.06678,0.066798,0.067989,0.066914,0.06491,0.067332,0.063834,0.066393,0.065229,0.063075,0.06356,0.064239,0.066174,0.057361,0.052609,0.053849,0.054196,0.054411,0.055143,0.05287,0.058362,0.055544,0.057982,0.054823,0.052486,0.055542,0.053999,0.054369,0.055817,0.055508,0.052612,0.054596,0.053281,0.055485,0.064072,0.065513,0.065693,0.065271,0.065801,0.065315,0.066658,0.065278,0.0646,0.055084,0.055404,0.055844,0.055231,0.054905,0.054878,0.054262,0.055135,0.054792,0.053269,0.053064,0.055296,0.053293,0.054623,0.055638,0.05554,0.054332,0.057544,0.053529,0.056523,0.053419,0.050587,0.053205,0.058393,0.053112,0.063728,0.068521,0.063997,0.064021,0.054073,0.055479,0.05321,0.055699,0.055285,0.056302,0.053566,0.051561,0.051323,0.056588,0.05493,0.054711,0.050855,0.052462,0.055825,0.051857,0.05695,0.054907,0.05333,0.056548,0.056455,0.052827,0.054676,0.05665,0.056442,0.054917,0.054799,0.056243,0.055854,0.056069,0.052716,0.056689,0.056937,0.05521,0.051299,0.057616,0.056759,0.058615,0.054738,0.056679,0.056592,0.052661,0.056788,0.055548,0.051329,0.054921,0.056388,0.055351,0.054036,0.059063,0.054258,0.056136,0.056394,0.058561,0.059711,0.056209,0.056067,0.055341,0.051815,0.055097,0.054154,0.053616,0.057914,0.05366,0.054919,0.057078,0.057301,0.055715,0.056247,0.055819,0.056216,0.054312,0.050927,0.056055,0.054681,0.052373,0.055306,0.053552,0.054205,0.052698,0.057465,0.054673,0.052341,0.053855,0.051104,0.055436,0.054051,0.055845,0.056222,0.053731,0.05489,0.056177,0.054135,0.053495,0.055143,0.055182,0.054772,0.053666,0.054677,0.055949,0.055285,0.052407,0.056871,0.055431,0.055648,0.053888,0.056646,0.054394,0.054908,0.053487,0.058162,0.05742,0.052998,0.055833,0.055504,0.054059,0.056482,0.052572,0.0587,0.057096,0.055445,0.057723,0.056709,0.054591,0.051035,0.057009,0.052386,0.055674,0.053505,0.055647,0.054628,0.056054,0.051371,0.055442,0.052443,0.055887,0.054785,0.053715,0.05439,0

.055348,0.052771,0.052672,0.055292,0.053729,0.051257,0.054315,0.053957,0.053664,0.052898,0.054515,0.057697,0.056682,0.053049,0.054803,0.055386,0.05466,0.056156,0.054182,0.058622,0.056767,0.053659,0.054805,0.054666,0.05502,0.056078,0.054734,0.05644,0.053284,0.052088,0.058258,0.051129,0.053986,0.056606,0.057235,0.051513,0.058607,0.053143,0.053791,0.056195,0.056155,0.058488,0.058042,0.055887,0.05543,0.056662,0.05254,0.054669,0.056066,0.052166,0.052968,0.058152,0.054572,0.056231,0.058799,0.054785,0.074123,0.074085,0.072292,0.076296,0.075152,0.072319,0.075218,0.073292,0.074288,0.074804,0.074236,0.072372,0.072986,0.075335,0.072277,0.073792,0.072718,0.073666,0.076143,0.075219,0.19281,0.22578,0.1895,0.21895,0.071912,0.072977,0.073997,0.074968,0.07473,0.074698,0.0754,0.072877,0.073631,0.075814,0.072677,0.075508,0.074323,0.075862,0.071925,0.34042,0.22255,0.20583,0.22946,0.22002,0.22041,0.22198,0.075272,0.072964,0.072555,0.072504,0.072543,0.074552,0.072493,0.07361,0.07197,0.073761,0.07519,0.073717,0.074174,0.073257,0.073241,0.36478,0.33964,0.20286,0.2099,0.2198,0.23414,0.23969,0.1953,0.19676,0.21788,0.074211,0.073767,0.076014,0.072972,0.074148,0.075645,0.076201,0.075449,0.073617,0.073416,0.07333,0.072444,0.074602,0.072621,0.073362,0.33586,0.34695,0.37926,0.21332,0.22311,0.1924,0.18877,0.20897,0.22242,0.23164,0.17336,0.251,0.072436,0.074597,0.072351,0.069776,0.074847,0.073939,0.074021,0.076224,0.073197,0.074459,0.072917,0.072684,0.073673,0.072716,0.073131,0.077529,0.34811,0.30873,0.39351,0.39172,0.20084,0.21143,0.22412,0.23286,0.20894,0.2249,0.21387,0.20505,0.21274,0.20378,0.074431,0.075336,0.07579,0.072872,0.07337,0.076342,0.075947,0.075908,0.074385,0.070988,0.073184,0.073373,0.073048,0.07451,0.072859,0.073331,0.35372,0.32957,0.35318,0.35691,0.34376,0.35061,0.23457,0.16193,0.17547,0.2005,0.21139,0.22117,0.2266,0.18335,0.1648,0.2461,0.074082,0.072593,0.075204,0.076059,0.075077,0.073947,0.070691,0.073308,0.074773,0.074623,0.073289,0.073497,0.070393,0.071264,0.072871,0.074645,0.075843,0.35485,0.34476,0.34368,0.36859,0.36695,0.31243,0.21802,0.2311,0.23028,0.23467,0.22292,0.24526,0.20344,0.22365,0.25806,0.20645,0.22267,0.071952,0.073681,0.07267,0.074913,0.073526,0.074072,0.072422,0.075747,0.073238,0.076826,0.077458,0.073746,0.073906,0.062568,0.063658,0.067594,0.073924,0.34876,0.34185,0.38146,0.34391,0.37383,0.35113,0.337,0.19593,0.20817,0.22569,0.21068,0.21399,0.23541,0.23835,0.24344,0.2493,0.20164,0.21207,0.073147,0.076733,0.073033,0.072311,0.073625,0.072019,0.07395,0.071467,0.071931,0.074727,0.074381,0.063621,0.061051,0.06415,0.067388,0.063788,0.061056,0.073321,0.3492,0.35073,0.32125,0.33171,0.36846,0.33659,0.37789,0.18788,0.17034,0.24052,0.21609,0.21654,0.26363,0.17905,0.19503,0.22806,0.22392,0.20383,0.07236,0.074938,0.072687,0.073296,0.074325,0.073838,0.07472,0.072785,0.071966,0.06441,0.063686,0.062158,0.064637,0.062855,0.065046,0.064627,0.064439,0.061654,0.076027,0.34511,0.3615,0.32513,0.33695,0.34207,0.37102,0.36337,0.21746,0.21312,0.23666,0.22789,0.19572,0.22118,0.22819,0.2235,0.22738,0.21947,0.24614,0.21273,0.074137,0.074579,0.073501,0.075043,0.073891,0.075218,0.061901,0.061837,0.063771,0.06617,0.065364,0.061158,0.067191,0.061316,0.063734,0.067085,0.06566,0.059873,0.36088,0.36417,0.35126,0.3694,0.36846,0.38725,0.38765,0.21857,0.19413,0.20469,0.24842,0.24225,0.20043,0.20318,0.19855,0.23115,0.22514,0.16926,0.20932,0.073279,0.073778,0.073681,0.066757,0.064603,0.063806,0.064544,0.067883,0.063214,0.06537,0.063859,0.062573,0.064318,0.06602,0.05991,0.064023,0.063202,0.063521,0.37914,0.32212,0.36029,0.31987,0.35353,0.35538,0.343

45,0.33864,0.36116,0.2085,0.2389,0.20389,0.21909,0.20802,0.18594,0.261  
9,0.23361,0.22023,0.21133,0.1979,0.065605,0.062323,0.062256,0.065322,0  
.065081,0.066386,0.066335,0.062575,0.062864,0.065051,0.065133,0.06463,  
0.064631,0.064521,0.064029,0.06431,0.063362,0.063328,0.36714,0.38515,0  
.3601,0.35979,0.37515,0.3552,0.3907,0.35131,0.3636,0.21812,0.21869,0.1  
6215,0.17127,0.15842,0.14237,0.17303,0.14541,0.16884,0.16807,0.16429,0  
.064943,0.059983,0.062894,0.064133,0.063166,0.065274,0.060775,0.061358  
,0.062371,0.068144,0.067712,0.065108,0.063988,0.066008,0.062526,0.0638  
46,0.058626,0.064747,0.35593,0.3216,0.38988,0.37705,0.37294,0.34117,0.  
36068,0.36382,0.34073,0.20268,0.17696,0.17262,0.19344,0.1855,0.16393,0  
.17125,0.14009,0.15303,0.15681,0.18372,0.065748,0.063005,0.067734,0.06  
2487,0.063776,0.065019,0.06356,0.066979,0.065495,0.06355,0.064444,0.06  
5979,0.067395,0.062256,0.067484,0.062526,0.067106,0.062161,0.36936,0.3  
5458,0.33548,0.35697,0.3939,0.36576,0.35997,0.16202,0.23689,0.2247,0.1  
6452,0.13696,0.1552,0.16455,0.16796,0.16591,0.15,0.12299,0.13323,0.161  
54,0.065529,0.062161,0.063934,0.065571,0.062416,0.065461,0.064415,0.06  
5818,0.06295,0.066808,0.064218,0.068878,0.064047,0.061836,0.063124,0.0  
67442,0.060307,0.063364,0.37134,0.33993,0.36495,0.36488,0.36489,0.3404  
1,0.18761,0.19938,0.22426,0.19889,0.26183,0.18248,0.16618,0.14157,0.15  
088,0.15529,0.14112,0.16002,0.15855,0.16196,0.063701,0.060457,0.063583  
,0.065049,0.065065,0.063661,0.064657,0.064738,0.064952,0.064174,0.0604  
95,0.065699,0.062647,0.067729,0.062737,0.066443,0.063967,0.06203,0.386  
72,0.35098,0.37519,0.3151,0.3633,0.21254,0.19786,0.20809,0.22947,0.218  
02,0.24652,0.12221,0.17774,0.1566,0.15351,0.17931,0.15631,0.19188,0.16  
339,0.16768,0.064045,0.06233,0.061187,0.061925,0.059885,0.063531,0.064  
83,0.065435,0.064929,0.066707,0.067149,0.065863,0.062161,0.061631,0.06  
3175,0.061541,0.065868,0.065131,0.34503,0.3686,0.3797,0.2057,0.19563,0  
.19447,0.20293,0.204,0.18925,0.22352,0.21444,0.17398,0.17002,0.16397,0  
.16565,0.17472,0.16174,0.17413,0.16263,0.1627,0.065667,0.065979,0.0625  
09,0.065128,0.063834,0.064817,0.065074,0.066276,0.064241,0.065639,0.06  
5675,0.060525,0.065233,0.065873,0.061819,0.061803,0.06426,0.064151,0.3  
6475,0.18707,0.23081,0.2043,0.22591,0.19129,0.2253,0.19879,0.19236,0.1  
9937,0.17999,0.16535,0.14824,0.17121,0.15353,0.15685,0.1456,0.16243,0.  
16696,0.063907,0.060602,0.065058,0.067359,0.065814,0.061799,0.065518,0  
.061641,0.067465,0.064716,0.061265,0.061949,0.067074,0.067196,0.064591  
,0.064752,0.062241,0.055077,0.18546,0.22851,0.27067,0.18771,0.18024,0.  
20164,0.19464,0.19427,0.25144,0.20891,0.1588,0.16961,0.14801,0.17112,0  
.14402,0.16021,0.15512,0.16709,0.15414,0.063532,0.065111,0.061203,0.06  
478,0.062904,0.064464,0.066567,0.063715,0.065183,0.060104,0.062744,0.0  
64872,0.066086,0.064495,0.059616,0.065697,0.064296,0.052679,0.22446,0.  
18953,0.19631,0.2037,0.2184,0.21344,0.18705,0.19219,0.19709,0.22698,0.  
15524,0.1744,0.16725,0.15818,0.16917,0.17096,0.15147,0.15767,0.065413,  
0.067815,0.065957,0.064706,0.063255,0.063974,0.064338,0.064227,0.06784  
7,0.064909,0.065394,0.063949,0.065588,0.064152,0.06076,0.070165,0.0632  
58,0.069883,0.055938,0.2058,0.20341,0.19372,0.1584,0.2105,0.2149,0.214  
94,0.24582,0.19174,0.21094,0.1549,0.17573,0.1469,0.1734,0.16737,0.1647  
3,0.18498,0.16476,0.066624,0.063425,0.062941,0.067657,0.063734,0.06461  
,0.062771,0.064582,0.06305,0.065999,0.065878,0.062707,0.062289,0.06332  
9,0.064052,0.065783,0.068134,0.057939,0.05822,0.054806,0.19393,0.19767  
,0.20198,0.20265,0.201,0.29238,0.23348,0.22922,0.1972,0.16317,0.15108,  
0.17508,0.16259,0.17745,0.16362,0.0626,0.061861,0.06158,0.065095,0.061  
958,0.061317,0.060103,0.065234,0.062549,0.063535,0.066583,0.064948,0.0

65517,0.058962,0.064645,0.065438,0.066679,0.067802,0.053651,0.054117,0.055043,0.055603,0.19339,0.20094,0.20037,0.19923,0.21586,0.2053,0.18391,0.26713,0.20409,0.15416,0.15134,0.15354,0.06615,0.065745,0.063306,0.064733,0.062636,0.064261,0.066243,0.061132,0.064912,0.062455,0.063979,0.063877,0.059583,0.066329,0.060653,0.062003,0.065362,0.062927,0.062487,0.067938,0.054882,0.056959,0.055359,0.052308,0.053733,0.052581,0.19639,0.17374,0.19706,0.23644,0.20449,0.22565,0.22349,0.2073,0.066613,0.064419,0.067758,0.066249,0.065794,0.063613,0.061756,0.06408,0.064571,0.063352,0.068106,0.067046,0.063871,0.06153,0.066271,0.06348,0.063169,0.06599,0.068601,0.060719,0.065234,0.063452,0.062868,0.055257,0.055609,0.054147,0.051973,0.052252,0.061656,0.22633,0.18306,0.20929,0.18857,0.20234,0.055107,0.054508,0.065522,0.064988,0.063316,0.06442,0.063769,0.063248,0.064477,0.062297,0.064564,0.062183,0.062759,0.063248,0.063283,0.065121,0.06447,0.065112,0.063217,0.063201,0.064017,0.064489,0.067115,0.054149,0.053175,0.056363,0.053299,0.055302,0.051319,0.053165,0.055597,0.05222,0.055559,0.27469,0.23533,0.054572,0.057979,0.053682,0.054441,0.058526,0.065069,0.063782,0.065781,0.065691,0.065347,0.0646,0.063119,0.062726,0.063086,0.054797,0.061989,0.062607,0.06182,0.060317,0.068773,0.064291,0.064855,0.066928,0.054632,0.052633,0.05579,0.054243,0.056544,0.057433,0.056458,0.056951,0.052489,0.053499,0.052727,0.054523,0.055396,0.054515,0.052682,0.054098,0.056645,0.066135,0.065272,0.058918,0.065246,0.062598,0.068588,0.06538,0.064726,0.064796,0.064707,0.063622,0.062697,0.065963,0.066077,0.063881,0.063501,0.057332,0.055902,0.053977,0.056258,0.057538,0.055724,0.061061,0.053729,0.051615,0.055459,0.054424,0.05187,0.051293,0.052152,0.053969,0.053719,0.053533,0.053987,0.056361,0.064135,0.066429,0.066115,0.064726,0.063503,0.067003,0.062381,0.064963,0.064437,0.061831,0.062685,0.062973,0.063568,0.057804,0.054073,0.052746,0.054811,0.055012,0.053308,0.052024,0.058461,0.053365,0.056333,0.05462,0.053414,0.054895,0.053694,0.0551,0.054049,0.055263,0.051808,0.054265,0.052932,0.054627,0.062124,0.064196,0.063942,0.063836,0.064089,0.062603,0.065808,0.064709,0.062106,0.055042,0.054745,0.056658,0.054894,0.054211,0.053834,0.054113,0.053987,0.05461,0.053738,0.053377,0.054168,0.053162,0.05585,0.055535,0.055294,0.054199,0.057837,0.053522,0.056038,0.055335,0.050925,0.052562,0.058189,0.051066,0.062885,0.066945,0.062161,0.062152,0.052549,0.05501,0.052482,0.053991,0.054952,0.055626,0.053365,0.051839,0.05194,0.055303,0.054462,0.054616,0.051333,0.053075,0.054408,0.051507,0.055905,0.053198,0.053308,0.055706,0.055543,0.051302,0.053668,0.056154,0.05732,0.05451,0.055761,0.056075,0.055443,0.055806,0.052627,0.057147,0.055959,0.055706,0.052184,0.057343,0.055263,0.05664,0.053713,0.056696,0.057162,0.051287,0.056257,0.05534,0.050247,0.054473,0.057254,0.055015,0.05525,0.05803,0.052722,0.056125,0.054825,0.057973,0.057518,0.055985,0.054442,0.054089,0.050623,0.054099,0.054943,0.054278,0.056542,0.054794,0.053367,0.056416,0.055201,0.055359,0.055177,0.055095,0.054547,0.05355,0.051328,0.056406,0.054298,0.052193,0.056075,0.051858,0.055561,0.051752,0.05645,0.054179,0.050697,0.053658,0.050155,0.055558,0.052228,0.055556,0.055912,0.053472,0.055262,0.054809,0.055362,0.052697,0.054232,0.053922,0.055444,0.053833,0.054318,0.05478,0.053293,0.05295,0.057006,0.055678,0.054294,0.053805,0.056144,0.05514,0.053146,0.052292,0.058002,0.055019,0.053749,0.053538,0.054351,0.053519,0.056411,0.051953,0.05766,0.056619,0.055337,0.057792,0.056952,0.053294,0.051153,0.057137,0.052073,0.05501,0.052668,0.055488,0.053285,0.055345,0.051182,0.055692,0.052641,0.054813,0.053892,0.054354,0.054986,0.0563



|         |         |         |         |         |         |
|---------|---------|---------|---------|---------|---------|
| 0       | 0       | 0       | 0.46775 | 0.48529 | 0.5     |
| 0       | 0       | 0       | 0       | 0       | 0       |
| 0       | 0       | 0       | 0       | 0       | 0       |
| 0       | 0       | 0       | 0       | 0       | 0       |
| 0       | 0       | 0       | 0       | 0       | 0       |
| 0       | 0       | 0       | 0       | 0       | 0       |
| 0.57881 | 0.51336 | 0.42939 | 0.57541 | 0.5     | 0.55421 |
| 0       | 0       | 0       | 0       | 0       | 0       |
| 0       | 0       | 0       | 0       | 0       | 0       |
| 0       | 0       | 0       | 0       | 0       | 0       |
| 0       | 0       | 0       | 0       | 0       | 0       |
| 0       | 0       | 0       | 0       | 0.4767  | 0.50079 |
| 0.41104 | 0.38479 | 0.42177 | 0.5     | 0.55974 | 0.50352 |
| 0.5     | 0       | 0       | 0       | 0       | 0       |
| 0       | 0       | 0       | 0       | 0       | 0       |
| 0       | 0       | 0       | 0       | 0       | 0       |
| 0       | 0       | 0       | 0       | 0       | 0       |
| 0       | 0       | 0       | 0.56406 | 0.53283 | 0.5     |
| 0.48297 | 0.5     | 0.45429 | 0.4858  | 0.56454 | 0.5     |
| 0.56337 | 0.40733 | 0.49109 | 0       | 0       | 0       |
| 0       | 0       | 0       | 0       | 0       | 0       |
| 0       | 0       | 0       | 0       | 0       | 0       |
| 0       | 0       | 0       | 0       | 0       | 0       |
| 0       | 0.44897 | 0.53232 | 0.5     | 0.50497 | 0.48089 |
| 0.5     | 0.51257 | 0.44985 | 0.5     | 0.49714 | 0.3338  |
| 0.44323 | 0.4609  | 0.53272 | 0.5     | 0       | 0       |
| 0       | 0       | 0       | 0       | 0       | 0       |
| 0       | 0       | 0       | 0       | 0       | 0       |
| 0       | 0       | 0       | 0       | 0       | 0       |
| 0.5     | 0.5     | 0.50193 | 0.51604 | 0.5177  | 0.45952 |
| 0.47932 | 0.5     | 0.63894 | 0.5     | 0.46975 | 0.45144 |
| 0.53304 | 0.5     | 0.44663 | 0.46347 | 0.5137  | 0.45307 |
| 0       | 0       | 0       | 0       | 0       | 0       |
| 0       | 0       | 0       | 0       | 0       | 0.29583 |
| 0.27299 | 0.43874 | 0.30226 | 0.34565 | 0.44239 | 0.36919 |
| 0.30668 | 0.39207 | 0.48305 | 0.46617 | 0.5     | 0.41237 |
| 0.51843 | 0.48967 | 0.57239 | 0.54924 | 0.46116 | 0.54628 |
| 0.5     | 0.49919 | 0.47754 | 0.59041 | 0.5     | 0.50451 |
| 0.52049 | 0.49502 | 0       | 0       | 0       | 0       |
| 0       | 0       | 0       | 0       | 0       | 0.47402 |
| 0.33946 | 0.36903 | 0.34518 | 0.28355 | 0.36868 | 0.30734 |
| 0.34947 | 0.42964 | 0.35716 | 0.29763 | 0.66614 | 0.5     |
| 0.51069 | 0.33944 | 0.46533 | 0.53571 | 0.45924 | 0.5     |
| 0.53825 | 0.52015 | 0.56145 | 0.5     | 0.5     | 0.5119  |
| 0.63154 | 0.49162 | 0.50092 | 0.5     | 0       | 0       |
| 0       | 0       | 0       | 0       | 0       | 0.5     |
| 0.53147 | 0.5     | 0.25004 | 0.33707 | 0.33333 | 0.3877  |
| 0.34906 | 0.31211 | 0.33333 | 0.35958 | 0.34543 | 0.33333 |
| 0.53581 | 0.5     | 0.38387 | 0.47272 | 0.5     | 0.38824 |
| 0.64228 | 0.53706 | 0.4636  | 0.51172 | 0.5     | 0.52459 |
| 0.5     | 0.36992 | 0.5     | 0.40303 | 0.5     | 0.66756 |
| 0       | 0       | 0       | 0       | 0       | 0       |

|         |         |         |         |         |         |
|---------|---------|---------|---------|---------|---------|
| 0.53126 | 0.49431 | 0.4311  | 0.34748 | 0.65797 | 0.28021 |
| 0.41276 | 0.36854 | 0.28822 | 0.34889 | 0.34276 | 0.41233 |
| 0.34006 | 0.3498  | 0.41871 | 0.50211 | 0.51855 | 0.49569 |
| 0.43912 | 0.4234  | 0.54855 | 0.5     | 0.48246 | 0.5273  |
| 0.55264 | 0.55824 | 0.53179 | 0.41852 | 0.50032 | 0.57922 |
| 0.61957 | 0.48105 | 0       | 0       | 0       | 0       |
| 0       | 0.53892 | 0.57155 | 0.47727 | 0.48852 | 0.52621 |
| 0.61699 | 0.34878 | 0.23424 | 0.30279 | 0.43985 | 0.30944 |
| 0.27984 | 0.24786 | 0.3734  | 0.40409 | 0.43496 | 0.45817 |
| 0.57773 | 0.62026 | 0.50049 | 0.56901 | 0.5     | 0.5     |
| 0.49816 | 0.49851 | 0.47004 | 0.49296 | 0.44032 | 0.54352 |
| 0.48188 | 0.56202 | 0.5     | 0.51853 | 0       | 0       |
| 0       | 0.60349 | 0.45227 | 0.39667 | 0.54399 | 0.43934 |
| 0.51153 | 0.48209 | 0.43489 | 0.27637 | 0.33333 | 0.2939  |
| 0.36224 | 0.33333 | 0.30543 | 0.33625 | 0.17886 | 0.33333 |
| 0.4842  | 0.51438 | 0.56569 | 0.42995 | 0.5     | 0.54304 |
| 0.49133 | 0.5     | 0.50593 | 0.48511 | 0.51408 | 0.41794 |
| 0.4867  | 0.5     | 0.5     | 0.50257 | 0.53635 | 0.42281 |
| 0       | 0.62502 | 0.54481 | 0.6091  | 0.55089 | 0.5     |
| 0.5     | 0.56623 | 0.5     | 0.50327 | 0.33573 | 0.38978 |
| 0.35067 | 0.42271 | 0.34831 | 0.3617  | 0.37373 | 0.29418 |
| 0.25831 | 0.47304 | 0.42288 | 0.4648  | 0.5     | 0.4897  |
| 0.46598 | 0.54841 | 0.55013 | 0.36088 | 0.52576 | 0.57065 |
| 0.5     | 0.48399 | 0.33431 | 0.5     | 0.43824 | 0.4483  |
| 1       | 0.51686 | 0.5     | 0.59695 | 0.5     | 0.48164 |
| 0.54454 | 0.46839 | 0.61468 | 0.5     | 0.5     | 0.35268 |
| 0.35151 | 0.27503 | 0.36585 | 0.33333 | 0.40798 | 0.27008 |
| 0.23351 | 0.30773 | 0.54964 | 0.59925 | 0.55704 | 0.5     |
| 0.5     | 0.5     | 0.43411 | 0.50519 | 0.46481 | 0.5248  |
| 0.58445 | 0.5     | 0.5     | 0.59671 | 0.51852 | 0.45119 |
| 0.54907 | 1       | 0.48833 | 0.48616 | 0.56067 | 0.43642 |
| 0.6233  | 0.51801 | 0.5     | 0.3462  | 0.47847 | 0.51542 |
| 0.33333 | 0.33333 | 0.36386 | 0.37158 | 0.33333 | 0.30878 |
| 0.33844 | 0.33333 | 0.5017  | 0.5     | 0.45711 | 0.53792 |
| 0.41637 | 0.50872 | 0.5     | 0.4761  | 0.52139 | 0.49768 |
| 0.5     | 0.49307 | 0.52748 | 0.51266 | 0.5     | 0.621   |
| 0.55382 | 0.49821 | 1       | 0.51985 | 0.59808 | 0.48053 |
| 0.5325  | 0.5     | 0.4472  | 0.62067 | 0.44874 | 0.51404 |
| 0.48935 | 0.35903 | 0.34209 | 0.27337 | 0.24001 | 0.24309 |
| 0.25814 | 0.34881 | 0.33333 | 0.50917 | 0.5353  | 0.24543 |
| 0.5     | 0.41794 | 0.5     | 0.66826 | 0.44077 | 0.43092 |
| 0.41054 | 0.5     | 0.42161 | 0.5513  | 0.50409 | 0.39835 |
| 0.5084  | 0.5     | 1       | 1       | 1       | 0.4913  |
| 0.50037 | 0.61299 | 0.5     | 0.50202 | 0.5     | 0.50864 |
| 0.43711 | 0.50108 | 0.33648 | 0.33333 | 0.35966 | 0.36913 |
| 0.37278 | 0.26348 | 0.5     | 0.47864 | 0.44309 | 0.54612 |
| 0.4505  | 0.52749 | 0.46049 | 0.5     | 0.387   | 0.4629  |
| 0.62192 | 0.5     | 0.5     | 0.48919 | 0.49819 | 0.41716 |
| 0.5     | 0.50568 | 1       | 1       | 1       | 1       |
| 0.5     | 0.54713 | 0.5     | 0.567   | 0.52255 | 0.41846 |
| 0.44383 | 0.5     | 0.7269  | 0.33333 | 0.34346 | 0.34963 |
| 0.5712  | 0.41812 | 0.5     | 0.36997 | 0.5     | 0.5257  |







|         |         |         |         |         |         |         |     |
|---------|---------|---------|---------|---------|---------|---------|-----|
| 0       | 0       | 0       | 0.54654 | 0.41692 | 0.42695 |         |     |
| 0.5     | 0.518   | 0.5254  | 0.4666  | 0.35561 | 0.50185 |         |     |
| 0.47851 | 0.5     |         | 1       | 1       | 1       |         | 1   |
| 1       | 1       | 1       | 1       | 1       | 1       |         | 1   |
| 1       | 1       | 1       | 0.53225 | 0.51471 | 0.5     |         |     |
| 1       | 0       | 0       | 0       | 0       | 0       |         |     |
| 0       | 0       | 0.5     | 0.46865 | 0.5     | 0.44082 |         |     |
| 0.5353  | 0.52344 |         | 0.5     | 0.69945 | 0.51903 |         | 0.5 |
| 0.53572 | 1       |         | 1       | 1       | 1       |         | 1   |
| 1       | 1       | 1       | 1       | 1       | 1       |         | 1   |
| 0.42119 | 0.48664 | 0.57061 | 0.42459 |         | 0.5     | 0.44579 |     |
| 1       | 0       | 0       | 0       | 0       | 0       |         |     |
| 0       | 0       | 0.52921 | 0.4285  | 0.55817 | 0.43824 |         |     |
| 0.5     | 0.5     | 0.50156 | 0.5     | 0.51818 | 0.50428 |         |     |
| 0.56713 | 1       |         | 1       | 1       | 1       |         | 1   |
| 1       | 1       | 1       | 1       | 0.5233  | 0.49921 |         |     |
| 0.58896 | 0.61521 | 0.57823 |         | 0.5     | 0.44026 | 0.49648 |     |
| 0.5     | 1       | 0       |         | 0       | 0       | 0       |     |
| 0       | 0       | 0       | 0.51584 | 0.48743 | 0.51845 |         |     |
| 0.5     | 0.49284 | 0.47105 | 0.5     | 0.47254 | 0.48211 |         |     |
| 0.5     | 0.5     | 0.52454 |         | 1       | 1       |         | 1   |
| 1       | 1       | 1       | 0.43594 | 0.46717 | 0.5     |         |     |
| 0.51703 | 0.5     | 0.54571 | 0.5142  | 0.43546 |         |         | 0.5 |
| 0.43663 | 0.59267 | 0.50891 |         | 0       | 0       |         | 0   |
| 0       | 0       | 0       |         | 0.5     | 0.54062 |         |     |
| 0.5     | 0.50567 | 0.52332 | 0.54486 | 0.5     | 0.34624 |         |     |
| 0.5802  | 0.5     | 0.5     | 0.52885 |         | 1       |         | 1   |
| 1       | 0.55103 | 0.46768 | 0.5     | 0.49503 | 0.51911 |         |     |
| 0.5     | 0.48743 | 0.55015 | 0.5     | 0.50286 | 0.6662  |         |     |
| 0.55677 | 0.5391  | 0.46728 |         | 0.5     | 0       |         | 0   |
| 0       | 0       | 0       | 0       | 0       | 0       |         |     |
| 0       | 0.45536 | 0.51206 | 0.5     | 0.5456  | 0.63177 |         |     |
| 0.49803 | 0.41205 | 0.43748 | 0.7112  | 0.54568 | 0.47678 |         |     |
| 0.5     | 0.5     | 0.49807 | 0.48396 | 0.4823  | 0.54048 |         |     |
| 0.52068 | 0.5     | 0.36106 | 0.5     | 0.53025 | 0.54856 |         |     |
| 0.46696 | 0.5     | 0.55337 | 0.53653 | 0.4863  | 0.54693 |         |     |
| 0       | 0       | 0       | 0       | 0       | 0       |         |     |
| 0       | 0       | 0       | 0.55176 | 0.51763 | 0.35209 |         |     |
| 0.31969 | 0.31386 | 0.35042 | 0.3087  | 0.23911 | 0.26162 |         |     |
| 0.34355 | 0.25663 | 0.51695 | 0.53383 | 0.5     | 0.58763 |         |     |
| 0.48157 | 0.51033 | 0.42761 | 0.45076 | 0.53884 | 0.45372 |         |     |
| 0.5     | 0.50081 | 0.52246 | 0.40959 | 0.5     | 0.49549 |         |     |
| 0.47951 | 0.50498 | 0       | 0       | 0       | 0       |         | 0   |
| 0       | 0       | 0       | 0       | 0       | 0       |         |     |
| 0.33946 | 0.36766 | 0.32789 | 0.3439  | 0.33387 | 0.34633 |         |     |
| 0.34947 | 0.2095  | 0.35716 | 0.35119 | 0.33386 | 0.5     |         |     |
| 0.48931 | 0.66056 | 0.53467 | 0.46429 | 0.54076 | 0.5     |         |     |
| 0.46175 | 0.47985 | 0.43855 | 0.5     | 0.5     | 0.4881  |         |     |
| 0.36846 | 0.50838 | 0.49908 | 0.5     | 0       | 0       |         |     |
| 0       | 0       | 0       | 0       | 0       | 0       |         |     |
| 0       | 0       | 0.33471 | 0.23697 | 0.33333 | 0.22461 |         |     |
| 0.27322 | 0.34394 | 0.33333 | 0.32068 | 0.37877 | 0.33333 |         |     |

|         |         |         |         |         |         |
|---------|---------|---------|---------|---------|---------|
| 0.46419 | 0.5     | 0.61613 | 0.52728 | 0.5     | 0.61176 |
| 0.35772 | 0.46294 | 0.5364  | 0.48828 | 0.5     | 0.47541 |
| 0.5     | 0.63008 | 0.5     | 0.59697 | 0.5     | 0.33244 |
| 0       | 0       | 0       | 0       | 0       | 0       |
| 0       | 0       | 0       | 0       | 0       | 0.3665  |
| 0.31379 | 0.44719 | 0.34528 | 0.23337 | 0.30383 | 0.31824 |
| 0.31988 | 0.36631 | 0.58129 | 0.49789 | 0.48145 | 0.50431 |
| 0.56088 | 0.5766  | 0.45145 | 0.5     | 0.51754 | 0.4727  |
| 0.44736 | 0.44176 | 0.46821 | 0.58148 | 0.49968 | 0.42078 |
| 0.38043 | 0.51895 | 0       | 0       | 0       | 0       |
| 0       | 0       | 0       | 0       | 0       | 0       |
| 0       | 0.34878 | 0.38948 | 0.3088  | 0.28396 | 0.38214 |
| 0.38514 | 0.34417 | 0.24842 | 0.222   | 0.56504 | 0.54183 |
| 0.42227 | 0.37974 | 0.49951 | 0.43099 | 0.5     | 0.5     |
| 0.50184 | 0.50149 | 0.52996 | 0.50704 | 0.55968 | 0.45648 |
| 0.51812 | 0.43798 | 0.5     | 0.48147 | 0       | 0       |
| 0       | 0       | 0       | 0       | 0       | 0       |
| 0       | 0       | 0       | 0.36182 | 0.33333 | 0.35305 |
| 0.4565  | 0.33333 | 0.38981 | 0.32751 | 0.41057 | 0.33333 |
| 0.5158  | 0.48562 | 0.43431 | 0.57005 | 0.5     | 0.45696 |
| 0.50867 | 0.5     | 0.49407 | 0.51489 | 0.48592 | 0.58206 |
| 0.5133  | 0.5     | 0.5     | 0.49743 | 0.46365 | 0.57719 |
| 0       | 0       | 0       | 0       | 0       | 0       |
| 0       | 0       | 0       | 0       | 0.33573 | 0.38098 |
| 0.29866 | 0.2583  | 0.34831 | 0.34788 | 0.37373 | 0.35291 |
| 0.41492 | 0.52696 | 0.57712 | 0.5352  | 0.5     | 0.5103  |
| 0.53402 | 0.45159 | 0.44987 | 0.63912 | 0.47424 | 0.42935 |
| 0.5     | 0.51601 | 0.66569 | 0.5     | 0.56176 | 0.5517  |
| 0       | 0       | 0       | 0       | 0       | 0       |
| 0       | 0       | 0       | 0       | 0       | 0.35268 |
| 0.35151 | 0.36249 | 0.22632 | 0.33333 | 0.38164 | 0.33909 |
| 0.38325 | 0.35742 | 0.45036 | 0.40075 | 0.44296 | 0.5     |
| 0.5     | 0.5     | 0.56589 | 0.49481 | 0.53519 | 0.4752  |
| 0.41555 | 0.5     | 0.5     | 0.40329 | 0.48148 | 0.54881 |
| 0.45093 | 0       | 0       | 0       | 0       | 0       |
| 0       | 0       | 0       | 0       | 0       | 0       |
| 0.33333 | 0.33333 | 0.33789 | 0.3766  | 0.33333 | 0.34307 |
| 0.36433 | 0.33333 | 0.4983  | 0.5     | 0.54289 | 0.46208 |
| 0.58363 | 0.49128 | 0.5     | 0.5239  | 0.47861 | 0.50232 |
| 0.5     | 0.50693 | 0.47252 | 0.48734 | 0.5     | 0.379   |
| 0.44618 | 0.50179 | 0       | 0       | 0       | 0       |
| 0       | 0       | 0       | 0       | 0       | 0       |
| 0       | 0.28195 | 0.31582 | 0.34199 | 0.38    | 0.35792 |
| 0.35755 | 0.30238 | 0.33333 | 0.49083 | 0.4647  | 0.75457 |
| 0.5     | 0.58206 | 0.5     | 0.33174 | 0.55923 | 0.56908 |
| 0.58946 | 0.5     | 0.57839 | 0.4487  | 0.49591 | 0.60165 |
| 0.4916  | 0.5     | 0       | 0       | 0       | 0       |
| 0       | 0       | 0       | 0       | 0       | 0       |
| 0       | 0       | 0.33648 | 0.33333 | 0.38263 | 0.29574 |
| 0.30292 | 0.36826 | 0.5     | 0.52136 | 0.55691 | 0.45388 |
| 0.5495  | 0.47251 | 0.53951 | 0.5     | 0.613   | 0.5371  |
| 0.37808 | 0.5     | 0.5     | 0.51081 | 0.50181 | 0.58284 |





|         |         |         |         |         |         |
|---------|---------|---------|---------|---------|---------|
| 0.5     | 0.5     | 0.58912 | 0.50294 | 0       | 0       |
| 0       | 0       | 0       | 0       | 0       | 0       |
| 0       | 0       | 0       | 0       | 0       | 0       |
| 0       | 0       | 0       | 1       | 1       | 1       |
| 1       | 1       | 1       | 0.45346 | 0.58308 | 0.57305 |
| 0.5     | 0.482   | 0.4746  | 0.5334  | 0.64439 | 0.49815 |
| 0.52149 | 0.5     | 0       | 0       | 0       | 0       |
| 0       | 0       | 0       | 0       | 0       | 0       |
| 0       | 0       | 0       | 0       | 0       | 0       |
| 0       | 1       | 1       | 1       | 1       | 1       |
| 1       | 1       | 0.5     | 0.53135 | 0.5     | 0.55918 |
| 0.4647  | 0.47656 | 0.5     | 0.30055 | 0.48097 | 0.5     |
| 0.46428 | 0       | 0       | 0       | 0       | 0       |
| 0       | 0       | 0       | 0       | 0       | 0       |
| 0       | 0       | 0       | 0       | 0       | 0       |
| 0       | 1       | 1       | 1       | 1       | 1       |
| 1       | 1       | 0.47079 | 0.5715  | 0.44183 | 0.56176 |
| 0.5     | 0.5     | 0.49844 | 0.5     | 0.48182 | 0.49572 |
| 0.43287 | 0       | 0       | 0       | 0       | 0       |
| 0       | 0       | 0       | 0       | 0       | 0       |
| 0       | 0       | 0       | 0       | 0       | 0       |
| 0       | 0       | 1       | 1       | 1       | 1       |
| 1       | 1       | 1       | 0.48416 | 0.51257 | 0.48155 |
| 0.5     | 0.50716 | 0.52895 | 0.5     | 0.52746 | 0.51789 |
| 0.5     | 0.5     | 0.47546 | 0       | 0       | 0       |
| 0       | 0       | 0       | 0       | 0       | 0       |
| 0       | 0       | 0       | 0       | 0       | 0       |
| 0       | 0       | 0       | 1       | 1       | 1       |
| 1       | 1       | 1       | 1       | 0.5     | 0.45938 |
| 0.5     | 0.49433 | 0.47668 | 0.45514 | 0.5     | 0.65376 |
| 0.4198  | 0.5     | 0.5     | 0.47115 | 0       | 0       |
| 0       | 0       | 0       | 0       | 0       | 0       |
| 0       | 0       | 0       | 0       | 0       | 0       |
| 0       | 0       | 0       | 0       | 1       | 1       |
| 1       | 1       | 1       | 1       | 1       | 1       |
| 1       | 0.54464 | 0.48794 | 0.5     | 0.4544  | 0.36823 |
| 0.50197 | 0.58795 | 0.56252 | 0.2888  | 0.45432 | 0.52322 |
| 0       | 0       | 0       | 0       | 0       | 0       |
| 0       | 0       | 0       | 0       | 0       | 0       |
| 0       | 0       | 0       | 0       | 0       | 0       |
| 1       | 1       | 1       | 1       | 1       | 1       |
| 1       | 1       | 1       | 0.44824 | 0.48237 | 0.35209 |
| 0.40732 | 0.24741 | 0.34732 | 0.34565 | 0.3185  | 0.36919 |
| 0.34977 | 0.3513  | 0       | 0       | 0       | 0       |
| 0       | 0       | 0       | 0       | 0       | 0       |
| 0       | 0       | 0       | 0       | 0       | 0       |
| 0       | 0       | 1       | 1       | 1       | 1       |
| 1       | 1       | 1       | 1       | 1       | 0.52598 |
| 0.32108 | 0.26332 | 0.32693 | 0.37254 | 0.29745 | 0.34633 |
| 0.30107 | 0.36086 | 0.28567 | 0.35119 | 0       | 0       |
| 0       | 0       | 0       | 0       | 0       | 0       |
| 0       | 0       | 0       | 0       | 0       | 0       |

|         |         |         |         |         |         |
|---------|---------|---------|---------|---------|---------|
| 0       | 0       | 0       | 0       | 1       | 1       |
| 1       | 1       | 1       | 1       | 1       | 0.5     |
| 0.46853 | 0.5     | 0.41525 | 0.42596 | 0.33333 | 0.3877  |
| 0.37772 | 0.34394 | 0.33333 | 0.31974 | 0.2758  | 0.33333 |
| 0       | 0       | 0       | 0       | 0       | 0       |
| 0       | 0       | 0       | 0       | 0       | 0       |
| 0       | 0       | 0       | 0       | 0       | 0       |
| 1       | 1       | 1       | 1       | 1       | 1       |
| 0.46874 | 0.50569 | 0.5689  | 0.65252 | 0.34203 | 0.35329 |
| 0.27346 | 0.18427 | 0.3665  | 0.41774 | 0.35341 | 0.26943 |
| 0.34006 | 0.28389 | 0       | 0       | 0       | 0       |
| 0       | 0       | 0       | 0       | 0       | 0       |
| 0       | 0       | 0       | 0       | 0       | 0       |
| 0       | 0       | 1       | 1       | 1       | 1       |
| 1       | 0.46108 | 0.42845 | 0.52273 | 0.51148 | 0.47379 |
| 0.38301 | 0.30244 | 0.37629 | 0.38841 | 0.27619 | 0.30842 |
| 0.33503 | 0.40796 | 0.37818 | 0.37391 | 0       | 0       |
| 0       | 0       | 0       | 0       | 0       | 0       |
| 0       | 0       | 0       | 0       | 0       | 0       |
| 0       | 0       | 0       | 0       | 1       | 1       |
| 1       | 0.39651 | 0.54773 | 0.60333 | 0.45601 | 0.56066 |
| 0.48847 | 0.51791 | 0.56511 | 0.36182 | 0.33333 | 0.35305 |
| 0.18126 | 0.33333 | 0.30476 | 0.33625 | 0.41057 | 0.33333 |
| 0       | 0       | 0       | 0       | 0       | 0       |
| 0       | 0       | 0       | 0       | 0       | 0       |
| 0       | 0       | 0       | 0       | 0       | 0       |
| 1       | 0.37498 | 0.45519 | 0.3909  | 0.44911 | 0.5     |
| 0.5     | 0.43377 | 0.5     | 0.49673 | 0.32854 | 0.22925 |
| 0.35067 | 0.31899 | 0.30337 | 0.29042 | 0.25254 | 0.35291 |
| 0.32677 | 0       | 0       | 0       | 0       | 0       |
| 0       | 0       | 0       | 0       | 0       | 0       |
| 0       | 0       | 0       | 0       | 0       | 0       |
| 0       | 0.48314 | 0.5     | 0.40305 | 0.5     | 0.51836 |
| 0.45546 | 0.53161 | 0.38532 | 0.5     | 0.5     | 0.29463 |
| 0.29698 | 0.36249 | 0.40783 | 0.33333 | 0.21038 | 0.39082 |
| 0.38325 | 0.33485 | 0       | 0       | 0       | 0       |
| 0       | 0       | 0       | 0       | 0       | 0       |
| 0       | 0       | 0       | 0       | 0       | 0       |
| 0       | 0       | 0.51167 | 0.51384 | 0.43933 | 0.56358 |
| 0.3767  | 0.48199 | 0.5     | 0.6538  | 0.52153 | 0.48458 |
| 0.33333 | 0.33333 | 0.29825 | 0.25182 | 0.33333 | 0.34815 |
| 0.29723 | 0.33333 | 0       | 0       | 0       | 0       |
| 0       | 0       | 0       | 0       | 0       | 0       |
| 0       | 0       | 0       | 0       | 0       | 0       |
| 0       | 0       | 0       | 0.48015 | 0.40192 | 0.51947 |
| 0.4675  | 0.5     | 0.5528  | 0.37933 | 0.55126 | 0.48596 |
| 0.51065 | 0.35903 | 0.34209 | 0.38464 | 0.38    | 0.39899 |
| 0.38431 | 0.34881 | 0.33333 | 0       | 0       | 0       |
| 0       | 0       | 0       | 0       | 0       | 0       |
| 0       | 0       | 0       | 0       | 0       | 0       |
| 0       | 0       | 0       | 0       | 0       | 0.5087  |
| 0.49963 | 0.38701 | 0.5     | 0.49798 | 0.5     | 0.49136 |





|   |   |   |   |   |   |
|---|---|---|---|---|---|
| 0 | 0 | 0 | 0 | 0 | 0 |
| 0 | 0 | 0 | 0 | 0 | 0 |
| 0 | 0 | 0 | 0 | 0 | 0 |
| 0 | 0 | 0 | 0 | 0 | 0 |
| 0 | 0 | 0 | 0 | 0 | 0 |
| 0 | 0 | 0 | 0 | 0 | 0 |
| 0 | 0 | 0 | 0 | 0 | 0 |
| 0 | 0 | 0 | 0 | 0 | 0 |
| 0 | 0 | 0 | 0 | 0 | 0 |
| 0 | 0 | 0 | 0 | 0 | 0 |
| 0 | 0 | 0 | 0 | 0 | 0 |
| 0 | 0 | 0 | 0 | 0 | 0 |
| 0 | 0 | 0 | 0 | 0 | 0 |
| 0 | 0 | 0 | 0 | 0 | 0 |
| 0 | 0 | 0 | 0 | 0 | 0 |
| 0 | 0 | 0 | 0 | 0 | 0 |
| 0 | 0 | 0 | 0 | 0 | 0 |
| 0 | 0 | 0 | 0 | 0 | 0 |
| 0 | 0 | 0 | 0 | 0 | 0 |
| 0 | 0 | 0 | 0 | 0 | 0 |
| 0 | 0 | 0 | 0 | 0 | 0 |
| 0 | 0 | 0 | 0 | 0 | 0 |
| 0 | 0 | 0 | 0 | 0 | 0 |
| 0 | 0 | 0 | 0 | 0 | 0 |
| 0 | 0 | 0 | 0 | 0 | 0 |
| 0 | 0 | 0 | 0 | 0 | 0 |
| 0 | 0 | 0 | 0 | 0 | 0 |
| 0 | 0 | 0 | 0 | 0 | 0 |
| 0 | 0 | 0 | 0 | 0 | 0 |
| 0 | 0 | 0 | 0 | 0 | 0 |
| 0 | 0 | 0 | 0 | 0 | 0 |

gtTCf=  
0  
0.1908  
0.21796  
0.19252  
0.15724  
0.12639  
0.10315  
0.086848  
0.075855  
0.068599  
0.063857  
0.060755  
0.058703  
0.057315  
0.056342  
0.055627  
0.055072  
0.054617

gtTCs=

0  
0.11925  
0.16824  
0.18061  
0.17524  
0.16239  
0.14746  
0.13307  
0.12035  
0.10964  
0.10088  
0.093851  
0.08828  
0.08389  
0.08044  
0.077724  
0.075577  
0.073866

gtTCp=

0  
2.385  
1.5979  
1.1196  
0.8287  
0.65143  
0.54309  
0.47655  
0.43538  
0.4096  
0.39316  
0.38239  
0.37506  
0.36982  
0.36585  
0.36266  
0.35995  
0.35753

X\_mask=

2.2204e-016, 2.2204e-016, 0.00061763, 2.2204e-016, 2.2204e-016, 2.2204e-016, 0.0004278, 0.00057388, 2.2204e-016, 0.00043688, 2.2204e-016, 2.2204e-016, 0.00019564, 2.2204e-016, 2.2204e-016, 9.9399e-005, 0.0007157, 0.00076826, 2.2204e-016, 0.0007104, 0.00056008, 2.2204e-016, 0.0082957, 0.003177, 2.2204e-016, 8.8879e-005, 2.2204e-016, 0.00035314, 2.2204e-016, 0.00056246, 2.2204e-016, 2.2204e-016, 0.00029035, 2.2204e-016, 0.00044059, 2.2204e-016, 0.00037434, 7.4226e-005, 2.2204e-016, 2.2204e-016, 0.0043374, 2.2204e-016, 0.00037397, 2.2204e-016, 2.2204e-016, 2.2204e-016, 0.00060884, 2.2204e-016, 0.00036047, 2.2204e-016, 0.00037379, 2.2204e-016, 2.2204e-016, 0.0001507, 2.2204e-016, 2.2204e-016, 0.00010846, 2.2204e-016, 2.2204e-016, 0.00016896, 0.00069264, 0.002242, 2.2204e-

016,0.0045239,0.00081875,2.2204e-016,2.2204e-016,0.0032659,2.2204e-016,2.2204e-016,2.2204e-016,0.00010579,2.2204e-016,2.2204e-016,2.2204e-016,6.6484e-005,2.2204e-016,0.00017334,2.2204e-016,2.2204e-016,0.00049422,0.00014586,0.00030893,0.00068522,2.2204e-016,0.00023592,2.2204e-016,2.2204e-016,0.00093717,2.2204e-016,0.0013226,2.2204e-016,2.2204e-016,0.0014769,2.2204e-016,2.2204e-016,2.2204e-016,2.2204e-016,2.2204e-016,2.2204e-016,0.00021117,8.5072e-005,2.2204e-016,0.0003727,0.00040633,6.4291e-005,2.2204e-016,2.2204e-016,0.00047999,2.2204e-016,2.2204e-016,2.2204e-016,0.00036382,6.8263e-005,2.2204e-016,0.0035144,2.2204e-016,2.2204e-016,0.00095367,2.2204e-016,2.2204e-016,2.2204e-016,2.2204e-016,0.0021401,2.2204e-016,2.2204e-016,0.002857,0.0031857,0.0060605,2.2204e-016,0.00094071,0.00025835,0.00010753,2.2204e-016,0.00054992,2.2204e-016,0.00030145,2.2204e-016,0.00052189,0.00021707,0.00047717,0.00030092,2.2204e-016,0.00027318,0.000825,0.0069264,0.0051041,0.00094085,0.0012298,2.2204e-016,0.0040347,0.00032473,2.2204e-016,0.0024823,2.2204e-016,0.0021372,0.002162,2.2204e-016,2.2204e-016,2.2204e-016,0.0011052,0.00022641,5.2276e-005,0.00036219,2.2204e-016,0.0001852,9.6097e-005,9.9035e-005,0.00011087,2.2204e-016,2.2204e-016,2.2204e-016,2.2204e-016,0.00052469,2.2204e-016,0.00063957,2.2204e-016,2.2204e-016,0.02224,0.001618,2.2204e-016,2.2204e-016,2.2204e-016,0.00070833,2.2204e-016,0.0028289,0.00177,2.2204e-016,0.001392,0.0037039,2.2204e-016,2.2204e-016,2.2204e-016,2.2204e-016,2.2204e-016,6.4953e-005,0.00012476,0.00052998,2.2204e-016,0.00044177,0.00018273,0.00060511,0.0002955,2.2204e-016,0.00024751,2.2204e-016,0.00069924,2.2204e-016,0.00059202,2.2204e-016,2.2204e-016,0.0003264,0.00018206,2.2204e-016,2.2204e-016,2.2204e-016,0.0071489,2.2204e-016,2.2204e-016,2.2204e-016,2.2204e-016,2.2204e-016,2.2204e-016,2.2204e-016,2.2204e-016,0.0018931,0.0062922,0.0025972,0.00051808,2.2204e-016,2.2204e-016,0.00022795,0.00038843,0.00085954,0.00046687,0.00024129,0.00034264,2.2204e-016,2.2204e-016,4.7015e-005,2.2204e-016,2.2204e-016,2.2204e-016,0.00052595,2.2204e-016,2.2204e-016,0.00063637,2.2204e-016,0.0001765,2.2204e-016,0.00058503,0.0093461,0.0073668,0.0020176,2.2204e-016,0.0090703,2.2204e-016,2.2204e-016,0.0010148,2.2204e-016,0.0036933,0.0022817,0.0046303,2.2204e-016,2.2204e-016,0.00096529,0.001169,2.2204e-016,0.00024017,2.2204e-016,2.2204e-016,2.2204e-016,0.00027001,1.0414e-005,2.2204e-016,0.00021866,2.2204e-016,2.2204e-016,6.2587e-005,0.00045963,2.2204e-016,0.00050003,2.2204e-016,0.00039549,0.00059636,2.2204e-016,2.2204e-016,2.2204e-016,0.0039018,0.0063518,2.2204e-016,2.2204e-016,2.2204e-016,0.0011969,2.2204e-016,0.0013014,0.00055161,2.2204e-016,2.2204e-016,2.2204e-016,2.2204e-016,0.0016521,0.0024313,2.2204e-016,0.00058034,0.00031813,0.0010885,0.00092201,2.2204e-016,0.00014333,2.2204e-016,2.2204e-016,2.2204e-016,2.2204e-016,2.2204e-016,2.2204e-016,3.598e-005,0.00018696,2.2204e-016,0.0010584,0.00023165,0.00024459,2.2204e-016,2.2204e-016,0.0011997,2.2204e-016,0.0037194,2.2204e-016,0.00029114,2.2204e-016,2.2204e-016,2.2204e-016,2.2204e-016,2.2204e-016,2.2204e-016

016,0.00052445,2.2204e-016,2.2204e-016,0.0039896,2.2204e-  
016,0.0031526,0.00050387,0.00033837,0.00026454,2.2204e-  
016,0.00039425,0.00043257,0.00054378,0.00034628,0.00058019,0.00081215,  
2.2204e-016,0.00057352,0.00080573,0.0015281,0.00018221,2.2204e-  
016,2.2204e-016,0.0006455,2.2204e-  
016,0.0027694,0.0036115,0.00181,0.00096574,2.2204e-  
016,0.0034179,2.2204e-016,2.2204e-016,2.2204e-  
016,0.0067452,0.00095586,2.2204e-016,2.2204e-016,2.2204e-  
016,0.0021508,0.0022769,0.00083305,2.2204e-  
016,0.0012077,0.0029491,2.2204e-016,2.2204e-016,6.2039e-005,2.2204e-  
016,0.00046245,0.00073869,0.00032757,0.00013662,2.2204e-016,2.2204e-  
016,2.2204e-016,2.2204e-016,0.00042041,2.2204e-016,0.00012303,2.2204e-  
016,2.2204e-  
016,0.00067378,0.0036619,0.0065899,0.0097097,0.0095061,2.2204e-  
016,2.2204e-016,0.01104,0.0082771,2.2204e-  
016,0.0016304,0.0031578,0.0030994,2.2204e-  
016,0.00023448,0.0015155,0.0023632,2.2204e-016,2.2204e-016,2.2204e-  
016,2.2204e-016,0.00023382,0.00040006,8.0431e-006,2.2204e-  
016,0.00035826,2.2204e-016,2.2204e-016,2.2204e-  
016,0.00053839,0.00067913,0.00063328,0.00077731,0.0012209,0.00042983,2  
.2204e-016,0.00036858,2.2204e-016,2.2204e-016,2.2204e-  
016,0.0031635,2.2204e-016,2.2204e-016,2.2204e-016,2.2204e-  
016,0.0097646,2.2204e-016,2.2204e-016,2.2204e-016,0.00079364,2.2204e-  
016,2.2204e-016,0.00041006,0.0046,0.00056795,0.0020998,2.2204e-  
016,2.2204e-016,0.00037302,2.2204e-016,6.1394e-005,0.00022367,2.2204e-  
016,3.801e-005,2.2204e-016,2.2204e-016,1.6215e-005,8.5929e-  
005,2.2204e-016,2.2204e-016,2.2204e-016,2.2204e-016,0.0008433,2.2204e-  
016,2.2204e-016,0.00020322,0.00053034,0.003897,2.2204e-  
016,0.009059,2.2204e-016,0.0037387,0.0067469,2.2204e-  
016,0.0027931,0.0011897,2.2204e-016,0.0042926,2.2204e-016,2.2204e-  
016,2.2204e-016,2.2204e-016,0.00071558,0.00061916,0.0010268,2.2204e-  
016,2.2204e-016,2.2204e-016,2.2204e-016,2.2204e-016,2.2204e-  
016,2.2204e-016,2.2204e-016,2.2204e-016,2.2204e-  
016,0.00054404,0.0014027,7.3699e-005,0.00016625,2.2204e-016,2.2204e-  
016,2.2204e-016,7.3589e-005,2.2204e-016,0.000527,0.0048545,2.2204e-  
016,2.2204e-016,2.2204e-016,0.0046827,0.0006227,0.003978,2.2204e-  
016,2.2204e-016,2.2204e-016,0.0037774,2.2204e-016,2.2204e-  
016,0.001329,2.2204e-016,0.00048734,2.2204e-016,0.00083263,2.2204e-  
016,2.2204e-016,2.2204e-016,2.2204e-016,0.00072137,0.00036305,2.2204e-  
016,0.00032469,0.00016998,5.5982e-008,0.00049434,2.2204e-  
016,0.00039005,2.2204e-016,0.00035449,0.00040781,2.2204e-016,8.7746e-  
005,2.2204e-016,0.00021208,2.2204e-016,0.0026888,2.2204e-016,2.2204e-  
016,0.0017435,0.0038832,0.0017353,0.0043239,2.2204e-  
016,0.0014072,0.00026305,0.0012248,2.2204e-016,0.00086599,2.2204e-  
016,0.00056422,2.2204e-016,2.2204e-016,0.0014911,2.2204e-016,2.2204e-  
016,0.00051028,2.2204e-016,2.2204e-016,2.2204e-016,0.0002227,4.4097e-  
005,0.00064991,0.00064549,2.2204e-016,2.2204e-016,0.00057321,2.2204e-  
016,2.2204e-016,0.00022749,0.00035246,2.2204e-016,0.0005753,2.2204e-  
016,2.2204e-016,0.011326,2.2204e-016,2.2204e-016,2.2204e-016,3.3244e-  
005,0.00065242,2.2204e-016,2.2204e-016,2.2204e-016,2.2204e-  
016,2.2204e-016,2.2204e-016,0.0020802,2.2204e-016,2.2204e-  
016,0.00020274,2.2204e-016,0.00012316,0.00012511,2.2204e-

016,0.00051293,2.2204e-016,0.00077939,0.00064693,2.2204e-016,2.2204e-  
016,2.2204e-016,3.6916e-005,2.2204e-016,0.000256,0.00024538,9.7225e-  
005,0.00061217,2.2204e-016,0.00060645,2.2204e-016,0.005291,2.2204e-  
016,2.2204e-016,2.2204e-  
016,0.0015171,0.00048016,0.0074681,0.0046517,2.2204e-  
016,0.00061761,0.0030544,0.0016896,0.0012184,0.0011123,2.2204e-  
016,2.2204e-016,0.0013375,0.0002016,2.2204e-016,2.2204e-  
016,0.00024897,0.00023501,0.00049881,2.2204e-016,2.2204e-016,2.2204e-  
016,2.2204e-016,2.2204e-016,0.0010591,2.2204e-  
016,0.00043881,0.00013786,2.2204e-016,0.0003534,2.2204e-016,2.2204e-  
016,0.00037789,0.0039608,0.002488,0.0027193,0.0028755,0.0012399,2.2204  
e-016,2.2204e-016,2.2204e-016,2.2204e-016,2.2204e-016,2.2204e-  
016,0.0022858,0.00081409,2.2204e-016,0.00024785,2.2204e-  
016,0.0002789,0.003405,0.0016816,0.00017548,0.00068454,0.00019512,0.00  
052624,0.00027531,2.2204e-  
016,0.00031027,0.00066665,0.00096014,2.2204e-016,2.2204e-  
016,0.00013976,2.2204e-016,0.00041502,2.2204e-016,2.2204e-016,2.2204e-  
016,0.00039676,0.006464,2.2204e-016,2.2204e-016,0.0034026,2.2204e-  
016,0.0029794,2.2204e-016,0.0073542,2.2204e-  
016,0.00039809,0.0027406,0.00074571,2.2204e-016,2.2204e-  
016,0.0013378,0.00010124,2.2204e-016,2.2204e-016,0.00054337,2.2204e-  
016,2.2204e-016,2.2204e-016,0.0013103,2.2204e-  
016,0.00029871,0.00012184,0.00019677,2.2204e-  
016,0.00072206,0.00095239,0.00041486,2.2204e-  
016,0.00046005,0.00021656,2.2204e-016,2.2204e-016,2.2204e-016,2.2204e-  
016,0.0026908,0.0011221,0.0017528,0.0014046,2.2204e-  
016,0.00066393,2.2204e-016,2.2204e-016,2.2204e-016,2.2204e-  
016,2.2204e-016,0.0010132,2.2204e-016,2.2204e-  
016,0.0017828,0.0030142,2.2204e-016,2.2204e-016,2.2204e-016,2.2204e-  
016,0.00022728,2.2204e-016,2.2204e-016,7.1608e-005,2.2204e-  
016,2.2204e-016,0.00055152,0.00013471,2.2204e-016,2.2204e-  
016,0.00049419,2.2204e-016,2.2204e-016,2.2204e-  
016,0.00025481,0.0010895,0.0001015,0.0039331,2.2204e-016,2.2204e-  
016,0.00092007,2.2204e-016,0.00060411,0.00084695,0.0019773,2.2204e-  
016,0.0010675,2.2204e-016,2.2204e-016,2.2204e-016,0.00077912,2.2204e-  
016,1.2093e-006,2.2204e-016,0.00036596,0.00040539,2.2204e-016,1.1085e-  
005,7.7533e-005,2.2204e-016,0.00025021,2.2204e-016,0.00067578,2.2204e-  
016,2.2204e-016,2.2204e-  
016,0.0007508,0.00028456,0.00091783,0.00015143,2.2204e-016,2.2204e-  
016,2.2204e-016,2.2204e-016,0.0030421,0.0018013,2.2204e-  
016,0.0048353,0.0004612,6.653e-005,0.0030402,2.2204e-  
016,0.0020263,2.2204e-016,2.2204e-016,0.0059954,2.2204e-016,2.2204e-  
016,2.2204e-016,2.2204e-016,0.00049313,2.2204e-016,2.2204e-  
016,0.00091842,0.00046928,0.00041093,2.2204e-016,2.2204e-  
016,0.00010073,0.00011735,0.00036778,2.2204e-016,2.2204e-016,2.2204e-  
016,2.2204e-016,7.4524e-005,2.2204e-016,2.2204e-016,2.2204e-  
016,0.00063793,0.0013698,2.2204e-016,2.2204e-016,0.0032454,2.2204e-  
016,0.00028463,2.2204e-016,0.0054709,2.2204e-016,0.00041267,2.2204e-  
016,2.2204e-016,0.00034268,0.00061288,0.00044962,2.2204e-016,2.2204e-  
016,0.00024049,2.2204e-016,2.2204e-016,2.2204e-  
016,0.00039964,0.00015992,2.2204e-016,8.3727e-006,2.2204e-016,2.2204e-  
016,2.2204e-016,0.00098274,8.5908e-005,0.00015976,2.2204e-016,2.2204e-

016,2.2204e-016,2.2204e-016,2.2204e-016,2.2204e-  
016,0.00022986,0.0012617,2.2204e-  
016,0.0026498,0.008166,0.0003676,2.2204e-016,0.00072066,2.2204e-  
016,0.00037105,0.00024703,0.00036128,0.00033987,0.00044365,2.2204e-  
016,2.2204e-016,2.2204e-016,2.2204e-016,0.0010008,5.1009e-  
005,0.00010245,2.2204e-016,2.2204e-016,2.2204e-  
016,0.00058539,0.00049394,2.2204e-016,0.00044404,2.2204e-  
016,0.00086505,0.00033543,2.2204e-016,0.00012784,2.2204e-  
016,0.00040614,0.0011789,2.2204e-016,8.659e-  
005,0.00067822,0.0003156,2.2204e-016,2.2204e-016,2.3436e-005,2.2204e-  
016,2.2204e-016,0.0010102,0.00019912,2.2204e-016,2.2204e-  
016,0.00052451,0.00049947,0.00041483,0.00020182,2.2204e-016,2.2204e-  
016,0.0001506,2.2204e-016,2.2204e-016,2.2204e-  
016,0.0012957,0.00034301,2.2204e-016,2.2204e-016,2.2204e-  
016,0.00057878,0.00056571,2.2204e-016,2.2204e-016,9.0806e-  
005,0.00013606,0.00061875,2.2204e-016,2.2204e-016,2.2204e-  
016,0.00045873,2.2204e-016,2.2204e-016,2.2204e-016,0.0001689,2.2204e-  
016,0.00034065,2.2204e-  
016,0.00023938,0.00042773,0.00062157,0.00039016,0.00079937,0.0006445,2  
.2204e-016,2.2204e-016,2.2204e-016,2.2204e-016,2.2204e-016,2.2204e-  
016,2.2204e-016,2.2204e-016,2.2204e-016,2.2204e-  
016,0.00038006,5.1187e-005,0.00035762,2.2204e-016,0.00062847,2.2204e-  
016,2.2204e-016,2.2204e-016,2.2204e-016,0.00019962,2.5293e-  
005,2.2204e-016,7.3156e-005,2.2204e-016,2.2204e-016,2.2204e-  
016,0.00044243,2.2204e-016,2.2204e-016,2.2204e-016,2.2204e-  
016,0.00062029,0.00017888,2.2204e-016,2.2204e-016,0.00086442,2.2204e-  
016,2.2204e-016,0.00031782,2.2204e-016,0.00049923,2.2204e-016,2.2204e-  
016,2.2204e-016,2.2204e-016,9.3661e-006,2.2204e-016,4.6452e-  
005,0.00040511,2.2204e-  
016,0.0013877,0.00025322,0.00067573,0.0004364,2.2204e-016,2.2204e-  
016,0.00018115,2.2204e-016,2.2204e-  
016,0.00072726,0.00011626,0.00060892,0.0010609,0.00058845,2.2204e-  
016,0.00025561,0.00053531,2.2204e-016,2.2204e-016,0.00030332,2.2204e-  
016,2.2204e-016,2.2204e-016,2.3774e-007,2.2204e-016,2.2204e-  
016,2.2204e-016,2.2204e-016,2.2204e-016,2.2204e-016,2.2204e-  
016,0.00027104,3.4402e-005,2.2204e-016,2.2204e-  
016,0.0003213,0.00087021,0.00036065,2.2204e-016,2.2204e-  
016,0.00010171,2.2204e-016,2.2204e-016,2.2204e-016,0.0002653,2.2204e-  
016,0.00028772,2.2204e-016,2.2204e-016,0.00039029,9.873e-  
007,0.00091504,2.2204e-016,0.00058016,3.5836e-005,0.0016444,2.2204e-  
016,0.00015991,0.00053173,0.00019667,0.0011232,0.00089612,2.2204e-  
016,0.00043094,2.2204e-016,2.2204e-016,2.2204e-016,6.6357e-  
005,0.0014595,0.00090987,2.2204e-016,2.2204e-016,2.2204e-016,2.2204e-  
016,0.000149,2.2204e-016,0.00084823,0.00074793,2.2204e-016,2.2204e-  
016,2.2204e-016,2.2204e-016,2.2204e-016,3.0893e-005,2.2204e-  
016,6.0047e-005,0.00031673,2.2204e-016,2.2204e-016,7.3894e-  
005,0.0004794,0.00015394,2.2204e-016,2.2204e-016,2.2204e-016,2.2204e-  
016,2.2204e-016,0.00034333,2.2204e-016,2.2204e-  
016,0.00019421,0.00040543,2.2204e-016,0.00029461,0.0009087,2.2204e-  
016,2.2204e-016,2.2204e-016,2.2204e-016,3.2166e-007,2.2204e-  
016,0.00014884,2.2204e-016,0.00020694,2.2204e-016,2.2204e-016,2.2204e-  
016,2.2204e-016,0.00075676,0.00054372,2.2204e-

016,0.0006549,0.0021348,2.2204e-016,0.00011898,2.2204e-  
016,0.00010522,2.2204e-016,2.2204e-016,2.2204e-  
016,0.00061477,0.00069093,2.6414e-005,2.2204e-  
016,0.00011174,0.00069734,0.00063198,2.2204e-016,2.2204e-016,2.2204e-  
016,0.00036839,2.2204e-016,0.00045844,2.2204e-016,0.00062806,2.2204e-  
016,5.5045e-005,0.00085818,2.2204e-016,0.00034336,7.7397e-005,2.2204e-  
016,0.00052326,0.00047745,2.2204e-  
016,0.00029143,0.00016888,0.0010374,2.2204e-016,2.2204e-016,2.2204e-  
016,8.9285e-005,0.00067257,0.00067158,0.00038295,2.2204e-  
016,0.00023159,3.6254e-005,2.2204e-  
016,0.0013254,0.00017972,0.00012775,2.2204e-  
016,0.00047225,0.00069646,0.00061841,0.00039488,2.2204e-  
016,0.00012507,2.2204e-016,9.2653e-005,0.00040223,0.0011281,2.2204e-  
016,0.00064022,2.2204e-016,7.5076e-005,0.00030678,2.2204e-  
016,0.00015588,2.2204e-016,0.00045598,0.00031259,0.00027278,2.2204e-  
016,0.00082234,0.00031564,0.00021794,0.0006652,2.2204e-016,2.2204e-  
016,0.00039885,0.00022809,0.00056837,2.2204e-016,0.00078127,2.2204e-  
016,2.2204e-016,0.00054552,2.2204e-016,0.00055955,2.2204e-  
016,0.00050507,0.00020396,0.00054547,0.00011623,0.00041704,2.2204e-  
016,2.2204e-016,0.00046488,2.2204e-016,2.2204e-  
016,0.00045792,0.0002563,0.00085136,0.00015392,0.0006619,2.2204e-  
016,0.00071871,2.2204e-016,0.0012654,2.2204e-016,0.0002043,2.2204e-  
016,2.2204e-016,2.2204e-  
016,0.00017367,0.00058159,0.00030585,0.0006983,2.2204e-016,3.8335e-  
005,9.0589e-005,2.2204e-016,2.2204e-016,2.2204e-016  
0.11919,0.11897,0.11953,0.11884,0.11939,0.11915,0.11967,0.12001,0.1187  
5,0.11969,0.1187,0.11907,0.11937,0.11905,0.11854,0.11922,0.11973,0.119  
97,0.11874,0.11991,1.1091,1.2513,1.3612,0.93463,0.1191,0.11964,0.11904  
,0.11943,0.11901,0.11989,0.1193,0.11907,0.11942,0.11863,0.11928,0.1185  
4,0.11967,0.11907,0.11933,2.3892,1.205,1.2765,1.2491,1.2483,1.3278,1.3  
956,0.11973,0.11902,0.11951,0.119,0.11957,0.1184,0.11914,0.1196,0.1188  
2,0.11827,0.11916,0.11833,0.11896,0.11912,0.11941,2.3847,2.3793,1.1085  
,1.569,1.2561,1.2565,1.3519,1.3871,1.3347,1.2221,0.11917,0.11839,0.119  
1,0.11898,0.11935,0.11943,0.11957,0.11887,0.1186,0.11941,0.11923,0.119  
62,0.12008,0.11885,0.11937,2.3768,2.3835,2.385,1.161,1.0625,1.2487,1.2  
469,1.2538,1.2497,1.2502,1.0019,1.4409,0.11818,0.11909,0.11943,0.1193,  
0.11898,0.11997,0.11973,0.11941,0.11858,0.1194,0.1196,0.11876,0.11866,  
0.11886,0.11984,0.11932,2.384,2.3942,2.3811,2.3839,1.1229,1.3198,1.535  
2,1.253,1.2287,1.2504,1.152,1.2936,0.97655,1.2585,0.11897,0.12034,0.11  
949,0.11971,0.11913,0.11941,0.11867,0.11964,0.11864,0.11926,0.11963,0.  
11968,0.11964,0.11875,0.11931,0.1201,2.3949,2.3911,2.3845,2.3875,2.386  
9,2.3894,1.1132,1.2525,1.3552,1.1735,1.3513,1.3255,1.2446,1.2527,1.453  
2,1.2577,0.11935,0.1192,0.11976,0.11906,0.11951,0.1195,0.11948,0.11908  
,0.11893,0.119,0.11898,0.11928,0.1199,0.11885,0.1198,0.11848,0.1191,2.  
407,2.3845,2.3798,2.3813,2.3834,2.3848,1.1455,1.4426,1.4205,1.2468,1.2  
149,1.1961,1.3267,1.5796,1.2465,1.3007,1.2495,0.1195,0.11932,0.11971,0  
.11894,0.11982,0.11949,0.12019,0.11946,0.11923,0.11959,0.11882,0.11961  
,0.11856,0.15339,0.15298,0.1545,0.11964,2.3825,2.3876,2.3791,2.3769,2.  
3893,2.3772,2.3744,1.2476,1.3237,1.252,1.3836,1.1685,1.1998,1.2578,0.8  
0301,1.209,1.2462,1.1725,0.11932,0.11954,0.12016,0.11988,0.11958,0.119  
5,0.1181,0.11881,0.11921,0.119,0.11892,0.15997,0.15637,0.1493,0.15969,  
0.15561,0.15879,0.11934,2.3792,2.3856,2.3953,2.3891,2.3833,2.3711,2.39



1, 1.1834, 1.414, 1.1209, 1.388, 1.2531, 1.2533, 1.2516, 1.2508, 1.2062, 1.2413, 1.1027, 0.11957, 0.11929, 0.11891, 0.11904, 0.11931, 0.11911, 0.11959, 0.11943, 0.11933, 0.15329, 0.15456, 0.148, 0.14668, 0.14979, 0.15462, 0.16011, 0.15462, 0.15583, 0.11986, 2.3788, 2.3835, 2.3802, 2.3858, 2.3883, 2.384, 2.3822, 1.2152, 1.2823, 1.2073, 1.2539, 1.2679, 1.317, 1.2509, 1.3138, 1.2914, 1.2519, 1.2558, 1.1987, 0.1187, 0.12033, 0.11965, 0.12058, 0.12016, 0.11913, 0.15962, 0.15722, 0.15459, 0.15364, 0.15489, 0.15176, 0.154, 0.15952, 0.15459, 0.16015, 0.14875, 0.15445, 2.3798, 2.3851, 2.3852, 2.382, 2.3868, 2.3824, 2.389, 1.2521, 1.1605, 1.2523, 1.2374, 1.1979, 1.1509, 1.2518, 1.6002, 1.0762, 1.2522, 1.2545, 1.1862, 0.11963, 0.11942, 0.11868, 0.15133, 0.15747, 0.15593, 0.15614, 0.15372, 0.15566, 0.15584, 0.15174, 0.15578, 0.15602, 0.1434, 0.15003, 0.15205, 0.15811, 0.15492, 2.3871, 2.3849, 2.3836, 2.3868, 2.3828, 2.3886, 2.3768, 2.3785, 2.3846, 1.3594, 1.2248, 1.2514, 1.1494, 0.95328, 1.2573, 1.453, 1.3963, 0.77134, 1.1503, 1.3064, 0.15416, 0.15413, 0.15513, 0.15573, 0.15647, 0.15285, 0.15374, 0.15498, 0.16392, 0.15477, 0.15164, 0.15138, 0.15757, 0.15453, 0.1512, 0.15216, 0.15566, 0.15237, 2.3935, 2.3935, 2.3898, 2.3921, 2.3803, 2.3779, 2.3955, 2.3933, 2.3789, 1.1347, 1.2157, 0.93979, 1.059, 0.71173, 0.92885, 0.92928, 0.87074, 0.98161, 0.93167, 0.94264, 0.15334, 0.1528, 0.15547, 0.14807, 0.15668, 0.15375, 0.15988, 0.15803, 0.15262, 0.15907, 0.1558, 0.15528, 0.15441, 0.16171, 0.15501, 0.15541, 0.15637, 0.15419, 2.379, 2.3852, 2.384, 2.3817, 2.3859, 2.3815, 2.3949, 2.3853, 2.3878, 1.3439, 0.87166, 0.74278, 0.88467, 0.98392, 0.82373, 0.9255, 0.82697, 0.96537, 0.79145, 0.93601, 0.16689, 0.15521, 0.15594, 0.14319, 0.15216, 0.15743, 0.15121, 0.1551, 0.15786, 0.15613, 0.15877, 0.15451, 0.15497, 0.15706, 0.16401, 0.15416, 0.1551, 0.15587, 2.3892, 2.376, 2.3941, 2.3818, 2.3826, 2.3875, 2.3815, 1.292, 1.2219, 1.2881, 1.0818, 1.1069, 0.89425, 1.0253, 0.99744, 0.92014, 0.89999, 0.87051, 0.76941, 0.89861, 0.15694, 0.15499, 0.14678, 0.15241, 0.15523, 0.14651, 0.16438, 0.15731, 0.15285, 0.15711, 0.15509, 0.15683, 0.15506, 0.14552, 0.15477, 0.14829, 0.1545, 0.16752, 2.3907, 2.3854, 2.373, 2.38, 2.39, 2.3826, 1.2221, 1.3004, 1.4342, 1.6203, 0.94408, 0.93779, 0.76771, 0.56379, 0.96916, 1.0929, 0.94342, 0.76004, 0.9117, 0.78725, 0.14876, 0.15463, 0.15718, 0.15497, 0.15042, 0.14976, 0.15928, 0.15514, 0.15379, 0.15669, 0.15895, 0.15902, 0.15748, 0.14994, 0.15505, 0.16097, 0.16382, 0.15371, 2.3818, 2.3903, 2.3815, 2.3823, 2.3854, 1.205, 1.1327, 1.3396, 1.3099, 1.2306, 1.0311, 0.8302, 0.98531, 1.021, 0.77658, 0.841, 0.89672, 1.057, 1.0039, 0.99012, 0.14956, 0.15251, 0.15968, 0.1637, 0.15512, 0.1602, 0.15521, 0.15537, 0.15549, 0.15418, 0.15235, 0.15518, 0.15047, 0.15807, 0.15388, 0.15951, 0.15442, 0.15694, 2.3835, 2.3721, 2.396, 1.0599, 1.3909, 1.5103, 1.1898, 1.4192, 1.2633, 1.3259, 1.4295, 0.95651, 0.89884, 0.94007, 0.5582, 0.89609, 0.8305, 0.904, 1.0602, 0.89671, 0.15417, 0.1562, 0.16029, 0.14945, 0.15582, 0.15884, 0.15475, 0.15508, 0.15453, 0.15376, 0.15606, 0.15, 0.15384, 0.15484, 0.1556, 0.15494, 0.15822, 0.14933, 2.391, 1.011, 1.1854, 1.0474, 1.1769, 1.2902, 1.2953, 1.1461, 1.2864, 1.2821, 0.89098, 0.6679, 0.93879, 0.87319, 0.82905, 0.80064, 0.71873, 0.93866, 0.87696, 0.15231, 0.14998, 0.15289, 0.15535, 0.15401, 0.15219, 0.15811, 0.15735, 0.14464, 0.1577, 0.15943, 0.15551, 0.15422, 0.14279, 0.15564, 0.15046, 0.15023, 0.19092, 1.2532, 1.288, 1.0796, 1.2913, 1.3294, 1.1878, 1.3579, 1.036, 1.2859, 1.2882, 0.81096, 0.82024, 0.9594, 1.0688, 0.8979, 0.62257, 1.0241, 1.0067, 0.9008, 0.15876, 0.16262, 0.15901, 0.15586, 0.15555, 0.15517, 0.15051, 0.15592, 0.15306, 0.15641, 0.16071, 0.15505, 0.1545, 0.162, 0.15588, 0.15128, 0.15867, 0.19124, 1.3164, 1.3165, 1.1533, 1.4327, 1.0177, 1.252, 1.2841, 1.6318, 1.3358, 1.2531, 0.90199, 0.89889, 0.8172, 0.71503, 0.89798, 0.92885, 0.8147, 0.89572, 0.15587, 0.15467, 0.1513, 0.15739, 0.1497, 0.15495, 0.15538, 0.15336, 0.15703, 0.15406, 0.15559, 0.15567, 0.15723, 0.15586, 0.15544, 0.16384, 0.15862, 0.15462, 0.19055, 1.2439, 1.0758, 1.3317, 1.2181,

1.2902,1.401,1.0244,1.4013,1.2551,1.31,0.9565,0.91614,1.0115,0.99225,1  
.0392,1.0104,0.93742,0.89704,0.1549,0.1574,0.13611,0.15527,0.14874,0.1  
5496,0.16709,0.15029,0.15035,0.14905,0.15523,0.14912,0.1582,0.15582,0.  
1476,0.15477,0.15476,0.191,0.19181,0.19103,1.3114,1.2813,1.0382,1.2891  
,1.2781,1.29,1.2694,1.4301,1.2836,0.88598,0.89686,0.72718,0.90336,0.88  
225,0.97318,0.15501,0.1537,0.15157,0.15852,0.15147,0.15731,0.15229,0.1  
5494,0.14704,0.15166,0.16404,0.15447,0.15451,0.1536,0.15522,0.14953,0.  
15591,0.15573,0.18983,0.18984,0.19107,0.19083,1.2908,1.1879,1.2864,1.1  
457,1.239,1.4642,1.4143,1.286,0.79176,0.89464,0.8807,0.83169,0.15959,0  
.14905,0.15474,0.14557,0.15525,0.15645,0.1549,0.15608,0.15418,0.16206,  
0.16332,0.1531,0.1561,0.15341,0.15536,0.15465,0.1659,0.15397,0.15375,0  
.15559,0.19012,0.19051,0.19019,0.19117,0.19213,0.19033,1.6371,1.1944,1  
.2974,1.2958,1.2866,1.5391,1.1203,1.6204,0.16401,0.15066,0.15718,0.155  
57,0.15547,0.1549,0.15911,0.15478,0.15503,0.1505,0.15899,0.15547,0.154  
34,0.1551,0.1584,0.15597,0.15588,0.15379,0.161,0.15195,0.13965,0.15245  
,0.15685,0.19065,0.19057,0.1905,0.18998,0.19088,0.19176,1.2853,1.291,1  
.437,1.3461,1.286,0.19147,0.19019,0.15644,0.14868,0.15352,0.15215,0.14  
976,0.15464,0.15216,0.16113,0.15343,0.15993,0.15656,0.15506,0.15834,0.  
15711,0.15934,0.15901,0.15136,0.15642,0.15535,0.15186,0.15581,0.19105,  
0.19078,0.19101,0.18979,0.19113,0.19217,0.19081,0.19125,0.19146,0.1912  
1,1.2883,1.375,0.19074,0.18991,0.19009,0.19196,0.15335,0.15421,0.15168  
,0.15572,0.1578,0.15592,0.15666,0.15834,0.15446,0.15587,0.15845,0.1564  
8,0.15483,0.15106,0.15496,0.15414,0.16021,0.15474,0.15561,0.19145,0.19  
004,0.19024,0.19082,0.19102,0.1916,0.19059,0.19087,0.18995,0.19115,0.1  
9024,0.18949,0.1906,0.1906,0.19042,0.19139,0.19078,0.15473,0.154,0.155  
82,0.14877,0.15265,0.15678,0.15355,0.15503,0.15768,0.15683,0.1513,0.15  
086,0.15447,0.14977,0.1552,0.16993,0.19104,0.19084,0.19086,0.19094,0.1  
9151,0.19033,0.1892,0.19027,0.19088,0.19084,0.19044,0.19031,0.19088,0.  
18976,0.19015,0.19067,0.19121,0.18951,0.19085,0.15988,0.15451,0.15712,  
0.15228,0.1545,0.15374,0.14995,0.16277,0.15809,0.15914,0.14923,0.15603  
,0.15537,0.19084,0.18975,0.19065,0.19083,0.1897,0.19088,0.19124,0.1902  
8,0.19181,0.19113,0.19164,0.1911,0.19014,0.1902,0.19083,0.18958,0.1902  
5,0.19121,0.19067,0.19126,0.19197,0.15115,0.15208,0.15584,0.15918,0.15  
334,0.16503,0.15826,0.1616,0.15485,0.19064,0.19075,0.19016,0.19051,0.1  
9089,0.19062,0.18997,0.19085,0.19105,0.19084,0.19127,0.19021,0.19026,0  
.19106,0.19163,0.19101,0.18954,0.19095,0.19135,0.19053,0.19004,0.19036  
,0.19132,0.18998,0.1913,0.16202,0.14905,0.15326,0.15703,0.1917,0.19041  
,0.19084,0.19096,0.19221,0.19041,0.19125,0.191,0.19069,0.19156,0.19192  
,0.19069,0.19126,0.19035,0.19,0.19043,0.191,0.19229,0.19171,0.19067,0.  
19014,0.19056,0.19008,0.19096,0.19055,0.1918,0.19116,0.19069,0.19088,0  
.19025,0.19093,0.19079,0.19084,0.19041,0.19069,0.19111,0.19075,0.19017  
,0.19089,0.19129,0.19123,0.19045,0.19093,0.19048,0.19066,0.18997,0.190  
64,0.19112,0.1902,0.19112,0.19118,0.18995,0.19095,0.19168,0.1901,0.190  
85,0.18991,0.19058,0.19098,0.18972,0.1912,0.19074,0.1911,0.19048,0.189  
83,0.18974,0.1904,0.19136,0.19156,0.19048,0.19163,0.19293,0.19127,0.19  
086,0.19129,0.19055,0.19038,0.19052,0.18992,0.19127,0.1913,0.19113,0.1  
9012,0.1909,0.19169,0.19098,0.19062,0.19063,0.19017,0.19091,0.19014,0.  
19134,0.1909,0.19126,0.19038,0.19083,0.19162,0.19072,0.19137,0.19111,0  
.19027,0.19136,0.19095,0.19047,0.19095,0.19087,0.19212,0.19071,0.1911,  
0.18984,0.19139,0.19124,0.19142,0.19131,0.1907,0.19095,0.19096,0.18988  
,0.192,0.1908,0.19094,0.18959,0.19155,0.19137,0.19111,0.19132,0.19022,  
0.19117,0.19086,0.19075,0.19093,0.19203,0.19009,0.19119,0.19027,0.1909

2, 0.19118, 0.18997, 0.19117, 0.18976, 0.19097, 0.19136, 0.19101, 0.19099, 0.19147, 0.19102, 0.19076, 0.19103, 0.1908, 0.1898, 0.19146, 0.19053, 0.19139, 0.19109, 0.19133, 0.19054, 0.18971, 0.19136, 0.19054, 0.19133, 0.19024, 0.19135, 0.19115, 0.19133, 0.19074, 0.19113, 0.19099, 0.19044, 0.19142, 0.18995, 0.18994, 0.19137, 0.19102, 0.19148, 0.19064, 0.19062, 0.19032, 0.19162, 0.18966, 0.19199, 0.1901, 0.19076, 0.19006, 0.19051, 0.19009, 0.19096, 0.19161, 0.19095, 0.19133, 0.19063, 0.19077, 0.19082, 0.18962, 0.19062, 0.19085  
0.16831, 0.16793, 0.1685, 0.16768, 0.16894, 0.16807, 0.1684, 0.16894, 0.16778, 0.16843, 0.16781, 0.1679, 0.16835, 0.1677, 0.16762, 0.16858, 0.16898, 0.16901, 0.16788, 0.16873, 0.79318, 0.88225, 0.95273, 0.68502, 0.168, 0.16858, 0.16833, 0.16832, 0.16812, 0.16895, 0.16833, 0.16827, 0.16894, 0.16781, 0.16827, 0.16793, 0.16856, 0.16799, 0.16864, 1.5963, 0.85312, 0.89667, 0.87927, 0.87926, 0.92915, 0.97121, 0.16894, 0.16821, 0.16854, 0.16808, 0.16875, 0.16751, 0.16832, 0.16833, 0.16785, 0.16711, 0.16833, 0.16742, 0.16789, 0.16814, 0.16815, 1.5952, 1.5895, 0.7935, 1.0837, 0.883, 0.88675, 0.94647, 0.96717, 0.93385, 0.86253, 0.16818, 0.16725, 0.16826, 0.16851, 0.16841, 0.168, 0.16846, 0.16764, 0.16765, 0.16809, 0.16827, 0.16863, 0.16905, 0.16807, 0.16814, 1.5917, 1.5948, 1.5943, 0.82356, 0.76403, 0.88027, 0.87947, 0.88287, 0.87968, 0.87963, 0.72585, 1.0041, 0.16704, 0.16838, 0.16839, 0.16824, 0.16807, 0.16886, 0.16869, 0.16829, 0.16759, 0.16874, 0.16843, 0.16776, 0.16776, 0.16796, 0.16873, 0.16797, 1.5984, 1.6029, 1.5887, 1.5977, 0.80142, 0.92672, 1.0623, 0.88291, 0.86977, 0.88205, 0.82094, 0.91061, 0.71037, 0.8917, 0.16779, 0.16907, 0.16867, 0.1685, 0.16813, 0.16826, 0.16754, 0.16878, 0.16797, 0.16805, 0.16851, 0.1687, 0.16865, 0.16786, 0.16801, 0.16892, 1.6101, 1.6019, 1.5914, 1.6, 1.5989, 1.5997, 0.79474, 0.8831, 0.94667, 0.83245, 0.94422, 0.93155, 0.87826, 0.8838, 1.0098, 0.8843, 0.1684, 0.16795, 0.16867, 0.16812, 0.16851, 0.16845, 0.16852, 0.16822, 0.1682, 0.16799, 0.16778, 0.16847, 0.16895, 0.16805, 0.16843, 0.16752, 0.16768, 1.6171, 1.5978, 1.5913, 1.5912, 1.6005, 1.5962, 0.81566, 1.0027, 0.98811, 0.87808, 0.86012, 0.84767, 0.92834, 1.0882, 0.87974, 0.91227, 0.88038, 0.1684, 0.16832, 0.16863, 0.16775, 0.16898, 0.16858, 0.16897, 0.1685, 0.16835, 0.16875, 0.1679, 0.16851, 0.16731, 0.19185, 0.19147, 0.19289, 0.16867, 1.5985, 1.6004, 1.5919, 1.5969, 1.6003, 1.5908, 1.5913, 0.87709, 0.92784, 0.8813, 0.96531, 0.82911, 0.8498, 0.88904, 0.60077, 0.85404, 0.8766, 0.8346, 0.16844, 0.1683, 0.16878, 0.16864, 0.16851, 0.16842, 0.16714, 0.16761, 0.1683, 0.16798, 0.16811, 0.19665, 0.19428, 0.18913, 0.19623, 0.19328, 0.19565, 0.16832, 1.5937, 1.5998, 1.6096, 1.6015, 1.5966, 1.5809, 1.6088, 0.83825, 0.98491, 0.80042, 0.96854, 0.88389, 0.88596, 0.88586, 0.88174, 0.85225, 0.87609, 0.78964, 0.16874, 0.16823, 0.16772, 0.16807, 0.16829, 0.16817, 0.16899, 0.16872, 0.16843, 0.19228, 0.19252, 0.18818, 0.18683, 0.18957, 0.19277, 0.19666, 0.19287, 0.1935, 0.16858, 1.5902, 1.5979, 1.5941, 1.5947, 1.6051, 1.5982, 1.6006, 0.8583, 0.9049, 0.8533, 0.88359, 0.891, 0.9246, 0.8822, 0.91975, 0.90635, 0.88239, 0.88702, 0.85088, 0.16757, 0.16953, 0.1685, 0.16961, 0.16883, 0.16819, 0.19606, 0.19435, 0.19315, 0.19169, 0.19329, 0.19083, 0.19199, 0.19632, 0.19251, 0.1966, 0.18909, 0.19298, 1.5966, 1.5971, 1.5971, 1.5935, 1.599, 1.5939, 1.6048, 0.88069, 0.82569, 0.88322, 0.87568, 0.84837, 0.81982, 0.88219, 1.1024, 0.77451, 0.8826, 0.88632, 0.84172, 0.16862, 0.16829, 0.16767, 0.19041, 0.19484, 0.19367, 0.19369, 0.19213, 0.19398, 0.19398, 0.19068, 0.19345, 0.19365, 0.18475, 0.18981, 0.19068, 0.19554, 0.19283, 1.6004, 1.5964, 1.6015, 1.597, 1.5951, 1.6001, 1.5905, 1.5876, 1.5988, 0.9526, 0.86799, 0.88287, 0.81662, 0.69324, 0.88619, 1.0087, 0.97514, 0.57865, 0.82157, 0.91531, 0.19252, 0.19235, 0.19274, 0.19362, 0.19393, 0.19205, 0.19227, 0.19328, 0.19882, 0.19321, 0.19085, 0.19046, 0.19499, 0.19295, 0.19029, 0.19144, 0.19332, 0.19132, 1.6085, 1.6055, 1.6001, 1.6066, 1.5891, 1.5927, 1.607, 1.6064, 1.5897, 0.80872, 0.86274, 0.68894, 0.76339,

0.54326,0.68092,0.67949,0.64465,0.71253,0.68131,0.68945,0.19141,0.1917  
1,0.19315,0.18798,0.19431,0.19227,0.19609,0.19512,0.19109,0.19588,0.19  
36,0.19362,0.19285,0.1983,0.19321,0.19342,0.19415,0.19216,1.594,1.5953  
,1.5997,1.591,1.598,1.5936,1.6118,1.6015,1.6008,0.9435,0.64376,0.56412  
,0.65265,0.7143,0.6158,0.67877,0.61815,0.7047,0.5941,0.68515,0.20137,0  
.19353,0.19396,0.18497,0.19091,0.1947,0.19032,0.19333,0.19461,0.19359,  
0.19594,0.19281,0.19307,0.19481,0.19913,0.1927,0.19311,0.19411,1.6036,  
1.5938,1.6053,1.5967,1.6025,1.6044,1.5922,0.91225,0.86549,0.90782,0.78  
05,0.79228,0.65753,0.74045,0.72108,0.67405,0.66506,0.64416,0.58049,0.6  
6138,0.19352,0.19349,0.18784,0.19125,0.19316,0.1871,0.19911,0.19431,0.  
19162,0.19451,0.19271,0.19455,0.19282,0.18674,0.19279,0.18828,0.19262,  
0.20188,1.6047,1.5982,1.585,1.5916,1.6031,1.5965,0.86732,0.91818,0.994  
47,1.1185,0.69153,0.68647,0.58097,0.44962,0.705,0.78252,0.68877,0.5748  
7,0.66931,0.59229,0.18838,0.19252,0.19459,0.19298,0.18938,0.18949,0.19  
665,0.19311,0.19216,0.19416,0.19622,0.19567,0.19499,0.18966,0.19328,0.  
19747,0.19943,0.19191,1.5934,1.6045,1.5916,1.5905,1.5953,0.85669,0.810  
62,0.94136,0.92041,0.87433,0.74775,0.61893,0.7139,0.7388,0.58527,0.623  
63,0.66033,0.76106,0.7272,0.71802,0.18897,0.19147,0.19631,0.19884,0.19  
3,0.19645,0.19309,0.19351,0.19355,0.19264,0.19134,0.19352,0.1898,0.195  
22,0.19259,0.19637,0.19244,0.19434,1.5907,1.5807,1.6093,0.76329,0.9733  
7,1.049,0.84642,0.98963,0.89059,0.9313,0.99766,0.69648,0.66071,0.68599  
,0.44721,0.66009,0.617,0.66719,0.76195,0.65851,0.19217,0.19384,0.19682  
,0.18929,0.19357,0.19587,0.19308,0.1932,0.1927,0.19193,0.19366,0.18955  
,0.19222,0.19309,0.19347,0.19321,0.19528,0.18899,1.6048,0.73292,0.8408  
2,0.75529,0.83701,0.91051,0.91499,0.81996,0.90557,0.90537,0.65807,0.51  
632,0.68705,0.64712,0.61683,0.59891,0.54822,0.68674,0.64749,0.19104,0.  
18951,0.19179,0.19348,0.19205,0.19078,0.19507,0.19456,0.18605,0.19483,  
0.1957,0.19359,0.19265,0.18435,0.19404,0.18977,0.18966,0.21824,0.88494  
,0.90937,0.77836,0.90982,0.93424,0.84593,0.95194,0.74951,0.90389,0.908  
15,0.60497,0.61227,0.69963,0.76728,0.6609,0.48707,0.74157,0.73079,0.66  
385,0.19578,0.19865,0.19571,0.19402,0.19349,0.19324,0.18995,0.19382,0.  
19165,0.19408,0.19659,0.19323,0.19262,0.19788,0.19364,0.18994,0.19577,  
0.21822,0.92566,0.92464,0.82291,0.99731,0.7392,0.88445,0.90454,1.1262,  
0.93887,0.88438,0.66447,0.66186,0.60952,0.54553,0.6614,0.67979,0.60762  
,0.65924,0.19361,0.19296,0.19052,0.19465,0.18979,0.19273,0.19332,0.191  
95,0.19465,0.19218,0.19379,0.19353,0.19493,0.19376,0.19371,0.1992,0.19  
574,0.19314,0.21792,0.88079,0.77725,0.93867,0.86581,0.91007,0.9799,0.7  
4272,0.98005,0.88626,0.92133,0.69661,0.67178,0.73215,0.71866,0.75059,0  
.73264,0.6877,0.66019,0.19307,0.19423,0.17961,0.19288,0.18868,0.19304,  
0.20145,0.18927,0.18982,0.18928,0.19342,0.18928,0.19513,0.19378,0.188,  
0.19271,0.19282,0.21789,0.21939,0.21794,0.92655,0.90292,0.75076,0.9105  
5,0.89854,0.90971,0.8957,0.99791,0.90483,0.65357,0.65997,0.55278,0.664  
46,0.65128,0.70921,0.19333,0.19157,0.19088,0.19549,0.19066,0.19475,0.1  
9115,0.19287,0.18753,0.19067,0.1997,0.19267,0.19293,0.19191,0.19374,0.  
1894,0.19363,0.19355,0.21682,0.21706,0.21794,0.21815,0.91206,0.84643,0  
.90821,0.82108,0.877,1.0184,0.98712,0.90684,0.5972,0.65845,0.64944,0.6  
1971,0.19604,0.18894,0.19242,0.18588,0.19331,0.19414,0.19319,0.19391,0  
.19273,0.19819,0.19858,0.19174,0.19387,0.19205,0.19357,0.19243,0.20077  
,0.19226,0.19214,0.1939,0.2176,0.21771,0.21751,0.21844,0.21907,0.21757  
,1.1322,0.85001,0.91159,0.91141,0.90555,1.0651,0.80239,1.1171,0.19951,  
0.18966,0.19489,0.19346,0.19311,0.19288,0.19583,0.19238,0.19321,0.1902  
6,0.19612,0.19306,0.19282,0.19333,0.19561,0.1938,0.19317,0.19234,0.197

5, 0.19101, 0.18266, 0.19119, 0.19436, 0.21771, 0.21783, 0.21792, 0.21774, 0.21757, 0.21892, 0.90388, 0.9128, 1.0036, 0.94376, 0.90711, 0.21847, 0.2179, 0.1943, 0.18874, 0.19224, 0.1911, 0.1897, 0.19312, 0.19084, 0.19782, 0.19193, 0.19706, 0.19407, 0.19303, 0.19529, 0.19429, 0.19608, 0.19618, 0.19077, 0.19439, 0.19373, 0.19061, 0.19404, 0.21851, 0.21807, 0.21835, 0.21701, 0.21839, 0.21933, 0.21838, 0.21822, 0.21848, 0.21869, 0.90996, 0.96228, 0.21813, 0.21709, 0.21743, 0.21922, 0.19158, 0.19271, 0.19063, 0.19411, 0.19552, 0.19377, 0.19385, 0.19496, 0.19257, 0.19392, 0.19532, 0.19411, 0.19272, 0.19077, 0.1935, 0.19228, 0.19642, 0.19325, 0.19358, 0.21861, 0.21693, 0.21772, 0.21812, 0.21822, 0.21839, 0.21804, 0.21758, 0.21714, 0.21875, 0.21753, 0.21718, 0.21821, 0.21748, 0.21757, 0.21795, 0.21801, 0.19283, 0.19256, 0.19384, 0.18896, 0.19174, 0.19426, 0.19165, 0.19285, 0.19455, 0.19446, 0.19056, 0.18992, 0.19268, 0.18961, 0.19306, 0.20318, 0.21839, 0.21787, 0.21807, 0.21833, 0.21848, 0.21747, 0.21664, 0.21734, 0.21765, 0.21824, 0.21822, 0.21726, 0.21757, 0.21677, 0.2174, 0.21743, 0.21861, 0.2168, 0.21815, 0.1966, 0.19258, 0.19438, 0.19155, 0.19257, 0.19222, 0.18974, 0.1985, 0.1952, 0.19627, 0.18885, 0.1937, 0.19331, 0.21821, 0.21735, 0.21765, 0.21832, 0.21695, 0.21775, 0.21835, 0.21723, 0.21875, 0.21837, 0.21878, 0.21842, 0.21714, 0.21804, 0.21716, 0.21672, 0.21822, 0.21842, 0.21809, 0.21854, 0.21894, 0.19048, 0.19105, 0.19355, 0.19594, 0.19188, 0.20004, 0.19586, 0.19736, 0.19287, 0.21711, 0.21787, 0.21714, 0.21772, 0.2181, 0.21786, 0.21707, 0.21773, 0.21784, 0.21792, 0.2187, 0.21719, 0.21768, 0.21794, 0.21857, 0.21783, 0.21643, 0.21772, 0.21827, 0.21782, 0.21688, 0.21729, 0.21805, 0.2174, 0.21838, 0.19777, 0.18889, 0.19179, 0.19442, 0.21861, 0.21747, 0.21791, 0.21759, 0.21912, 0.2176, 0.21842, 0.21766, 0.21825, 0.21897, 0.21887, 0.21784, 0.2184, 0.21783, 0.2178, 0.2178, 0.21783, 0.21931, 0.21869, 0.21804, 0.21728, 0.21747, 0.21699, 0.21812, 0.21769, 0.21843, 0.21829, 0.21747, 0.21801, 0.21759, 0.21807, 0.2174, 0.2175, 0.21752, 0.21788, 0.21844, 0.21783, 0.21738, 0.21811, 0.21866, 0.2185, 0.21772, 0.21838, 0.21803, 0.21762, 0.21739, 0.21765, 0.21875, 0.21759, 0.21855, 0.21817, 0.21728, 0.21841, 0.21858, 0.21693, 0.21797, 0.21662, 0.21776, 0.21809, 0.21738, 0.21835, 0.21795, 0.21851, 0.21731, 0.21674, 0.21689, 0.21795, 0.21861, 0.21835, 0.21759, 0.21864, 0.22002, 0.21814, 0.21769, 0.21818, 0.21745, 0.21782, 0.21742, 0.21728, 0.21801, 0.21877, 0.21811, 0.21725, 0.21827, 0.21897, 0.21831, 0.21753, 0.21743, 0.2174, 0.21822, 0.21739, 0.21822, 0.21765, 0.21858, 0.2179, 0.21829, 0.21874, 0.21813, 0.21807, 0.21814, 0.21738, 0.21856, 0.21812, 0.21775, 0.21837, 0.21797, 0.21905, 0.21775, 0.21799, 0.21703, 0.2184, 0.21842, 0.21867, 0.21828, 0.21806, 0.21789, 0.21801, 0.21689, 0.21916, 0.21792, 0.21806, 0.2168, 0.21851, 0.21816, 0.21882, 0.21838, 0.21736, 0.21852, 0.21815, 0.21793, 0.21791, 0.2191, 0.2176, 0.21873, 0.21759, 0.21806, 0.21836, 0.2171, 0.21795, 0.2165, 0.21883, 0.21859, 0.21782, 0.21814, 0.21851, 0.21818, 0.21779, 0.21752, 0.2179, 0.21717, 0.21858, 0.21753, 0.21882, 0.21803, 0.21873, 0.21767, 0.21666, 0.21857, 0.21808, 0.2185, 0.21771, 0.21859, 0.21848, 0.2183, 0.21794, 0.21788, 0.21785, 0.21768, 0.21871, 0.21715, 0.21708, 0.21866, 0.21793, 0.21846, 0.21772, 0.21764, 0.21739, 0.21862, 0.21703, 0.21868, 0.21745, 0.21762, 0.21696, 0.21784, 0.21728, 0.21786, 0.21852, 0.21803, 0.21844, 0.21753, 0.21768, 0.21749, 0.2169, 0.21809, 0.21811  
0.18068, 0.18031, 0.18101, 0.18022, 0.18131, 0.18052, 0.18078, 0.18108, 0.18008, 0.18104, 0.17999, 0.18033, 0.18033, 0.18032, 0.18, 0.18103, 0.18106, 0.18124, 0.17997, 0.18109, 0.59152, 0.65129, 0.69677, 0.52023, 0.18015, 0.18099, 0.18042, 0.18086, 0.18018, 0.18134, 0.18005, 0.18084, 0.18132, 0.17996, 0.18023, 0.18051, 0.18102, 0.18066, 0.18083, 1.117, 0.62856, 0.65695, 0.64701, 0.64543, 0.67993, 0.70723, 0.1811, 0.18049, 0.18082, 0.18077, 0.18091, 0.18051, 0.18042, 0.18092, 0.18022, 0.17951, 0.1805, 0.18008, 0.1803, 0.18049, 0.18069, 1.1188, 1.1

112,0.58861,0.78005,0.64866,0.65315,0.69276,0.70384,0.68457,0.63605,0.1805,0.17938,0.18058,0.18108,0.1808,0.18027,0.18083,0.18012,0.18001,0.1801,0.18029,0.18103,0.18145,0.18045,0.18068,1.1098,1.1139,1.1168,0.6169,0.57208,0.64801,0.64661,0.64909,0.64815,0.64527,0.5484,0.72933,0.17946,0.18061,0.18063,0.18064,0.18044,0.18121,0.18132,0.18066,0.18012,0.18145,0.18068,0.1805,0.18027,0.18054,0.18116,0.17996,1.1215,1.1174,1.1089,1.1223,0.59844,0.68205,0.76741,0.64847,0.64132,0.65191,0.60857,0.66909,0.53759,0.65938,0.18031,0.18143,0.18083,0.18039,0.18038,0.18062,0.17989,0.18131,0.18034,0.18048,0.18106,0.18077,0.18108,0.18019,0.18021,0.18105,1.131,1.1257,1.1145,1.1255,1.1162,1.1219,0.59149,0.65171,0.69177,0.61661,0.68966,0.68011,0.64592,0.64946,0.73155,0.65033,0.18105,0.1804,0.18109,0.18053,0.18071,0.1806,0.18078,0.18032,0.18036,0.18043,0.18022,0.18104,0.18142,0.18035,0.18079,0.17973,0.18001,1.1377,1.1157,1.113,1.114,1.1217,1.118,0.60701,0.73018,0.71989,0.64638,0.63423,0.62753,0.68017,0.78932,0.6476,0.66661,0.64704,0.18055,0.18027,0.18126,0.1808,0.18128,0.18077,0.18125,0.18085,0.18072,0.18081,0.18054,0.18117,0.18016,0.18669,0.18552,0.18651,0.18102,1.1197,1.1131,1.1122,1.1178,1.1204,1.1107,1.1129,0.64701,0.67884,0.64857,0.70506,0.6155,0.62859,0.65481,0.466,0.62948,0.64544,0.62005,0.18077,0.18058,0.18107,0.18107,0.18088,0.18097,0.17983,0.18003,0.18026,0.1805,0.18029,0.18684,0.18685,0.18543,0.18672,0.18655,0.18695,0.18046,1.1133,1.1182,1.1299,1.1246,1.1216,1.1057,1.1317,0.61962,0.71947,0.59672,0.70586,0.65007,0.6512,0.65359,0.64938,0.62803,0.64641,0.58804,0.18092,0.18025,0.1801,0.18019,0.18104,0.1806,0.18122,0.18079,0.18068,0.18664,0.18588,0.1853,0.18511,0.1858,0.1863,0.18793,0.186,0.18712,0.18102,1.1094,1.1188,1.1158,1.117,1.1255,1.1171,1.1201,0.63212,0.6653,0.63013,0.65007,0.65501,0.67855,0.65047,0.67355,0.66609,0.64969,0.65077,0.62905,0.17985,0.18151,0.18105,0.18163,0.18117,0.18056,0.18707,0.18654,0.18696,0.18578,0.18683,0.18617,0.18606,0.18768,0.18618,0.18762,0.18583,0.18678,1.1199,1.1214,1.1208,1.1171,1.1193,1.1152,1.1263,0.6464,0.61096,0.64995,0.64511,0.62648,0.6085,0.65044,0.79111,0.57922,0.64977,0.65448,0.62337,0.18132,0.18056,0.17973,0.18556,0.18709,0.18675,0.1871,0.18589,0.18782,0.18682,0.18593,0.18727,0.18734,0.18476,0.18537,0.18556,0.18752,0.18645,1.1235,1.1196,1.1214,1.1186,1.1158,1.1231,1.1115,1.1093,1.1181,0.69682,0.64161,0.65228,0.60685,0.52678,0.65291,0.73197,0.71106,0.44941,0.61221,0.6717,0.18602,0.18574,0.18578,0.18624,0.18665,0.18685,0.18637,0.18673,0.18729,0.18659,0.1855,0.18584,0.18729,0.18619,0.18556,0.18633,0.18686,0.18659,1.1303,1.1264,1.123,1.1279,1.1117,1.1167,1.1307,1.1303,1.1118,0.60239,0.6389,0.51817,0.56346,0.41686,0.51154,0.50891,0.48363,0.53006,0.51059,0.51439,0.18545,0.18644,0.18672,0.18463,0.18683,0.18629,0.18687,0.18676,0.18597,0.18684,0.18715,0.18741,0.18696,0.18838,0.18671,0.18658,0.18717,0.18615,1.1175,1.1226,1.1257,1.1149,1.1175,1.1181,1.134,1.121,1.125,0.68075,0.48626,0.43333,0.49135,0.53386,0.46852,0.51014,0.46897,0.52262,0.45222,0.5142,0.18817,0.18712,0.18727,0.18423,0.1852,0.18699,0.18481,0.1864,0.18645,0.18658,0.18772,0.18624,0.18659,0.18778,0.18727,0.1865,0.18661,0.18759,1.1267,1.1178,1.1261,1.12,1.1251,1.1275,1.1167,0.6591,0.62795,0.65794,0.57795,0.58301,0.49381,0.54803,0.53484,0.50655,0.5018,0.48352,0.44458,0.49852,0.1858,0.18687,0.18572,0.18617,0.18661,0.18478,0.18696,0.18661,0.18629,0.18785,0.18646,0.18648,0.18604,0.18531,0.18617,0.18526,0.18633,0.18849,1.1254,1.1184,1.1086,1.1149,1.1251,1.12,0.63058,0.66297,0.71444,0.79921,0.5123,0.5133,0.44343,0.35802,0.52576,0.57687,0.5164,0.44076,0.50085,0.4522,0.18442,0.1857,0.18723,0.18672,0.18562

,0.18579,0.18804,0.18661,0.18672,0.18664,0.18781,0.18671,0.18727,0.18607,0.18681,0.18781,0.18836,0.18621,1.1127,1.1251,1.1113,1.1104,1.1186,0.62188,0.58936,0.67859,0.66276,0.6332,0.54752,0.47022,0.53551,0.54826,0.44472,0.47352,0.49716,0.56499,0.54085,0.53356,0.18455,0.18653,0.18683,0.18769,0.18633,0.18756,0.18667,0.18707,0.18721,0.186,0.18619,0.18679,0.18553,0.18701,0.1864,0.18722,0.18604,0.18674,1.1164,1.1049,1.1311,0.55705,0.70037,0.75172,0.61591,0.70942,0.64454,0.66801,0.71536,0.52097,0.49841,0.51505,0.35549,0.49721,0.47015,0.5026,0.56504,0.49498,0.18586,0.18681,0.18772,0.18522,0.18724,0.18782,0.18718,0.18644,0.18601,0.18593,0.1865,0.18617,0.18602,0.18659,0.18739,0.1864,0.18758,0.18509,1.1263,0.53874,0.61248,0.55516,0.6094,0.65876,0.66393,0.59808,0.65431,0.65364,0.49569,0.40139,0.51257,0.48647,0.46799,0.45627,0.42267,0.5148,0.48986,0.18569,0.1859,0.18677,0.18725,0.18592,0.18543,0.18645,0.18688,0.18491,0.18718,0.1865,0.18692,0.18681,0.18427,0.18661,0.18586,0.18529,0.19274,0.64012,0.65641,0.57058,0.66079,0.67305,0.61433,0.68353,0.54952,0.65316,0.65785,0.45942,0.46417,0.52307,0.5649,0.49691,0.38113,0.55175,0.54751,0.50084,0.18772,0.1882,0.18697,0.18767,0.18658,0.18659,0.18577,0.18703,0.18633,0.18662,0.18678,0.18667,0.18596,0.18752,0.18674,0.18552,0.18717,0.19293,0.66631,0.66806,0.59803,0.71764,0.54267,0.63858,0.65394,0.80612,0.67732,0.63824,0.50037,0.49789,0.46293,0.42092,0.49793,0.50985,0.46205,0.49522,0.18665,0.1866,0.18561,0.18645,0.18622,0.18597,0.18731,0.18662,0.18763,0.18593,0.18702,0.18683,0.18738,0.18648,0.18694,0.18811,0.18702,0.18631,0.19223,0.63872,0.56892,0.6775,0.62855,0.65935,0.7024,0.54501,0.70512,0.64076,0.66342,0.52003,0.50326,0.54587,0.53534,0.55621,0.54607,0.51522,0.49486,0.18619,0.18654,0.18282,0.18631,0.18538,0.18649,0.18849,0.18509,0.18563,0.18605,0.18666,0.18575,0.18667,0.18731,0.18535,0.18593,0.18617,0.1925,0.19342,0.19233,0.67038,0.65335,0.54887,0.65836,0.64863,0.65618,0.64756,0.71753,0.65348,0.49332,0.49716,0.42602,0.49838,0.48995,0.5323,0.18674,0.18591,0.18626,0.18705,0.18611,0.1873,0.18623,0.18641,0.18497,0.1861,0.18865,0.18647,0.18649,0.18587,0.18756,0.18607,0.18665,0.18702,0.19128,0.1917,0.19246,0.19245,0.66299,0.6156,0.65827,0.59875,0.63401,0.73076,0.7124,0.65583,0.44773,0.4951,0.48923,0.46999,0.18705,0.18536,0.18612,0.18424,0.1865,0.18692,0.18652,0.1871,0.18661,0.18777,0.1879,0.18557,0.18684,0.1863,0.18652,0.1861,0.18854,0.1858,0.1866,0.18747,0.19247,0.19219,0.19187,0.19293,0.19366,0.19199,0.81024,0.61559,0.66071,0.65921,0.6529,0.75988,0.58496,0.79702,0.18815,0.18505,0.18747,0.18712,0.1867,0.18615,0.18663,0.18614,0.18631,0.18598,0.18714,0.1865,0.18668,0.18719,0.18686,0.18673,0.18595,0.18668,0.18793,0.18567,0.18447,0.18608,0.18694,0.19224,0.1922,0.19264,0.19219,0.19247,0.1938,0.65121,0.66163,0.72134,0.67963,0.6571,0.19338,0.19285,0.18723,0.18552,0.18642,0.18663,0.18647,0.18644,0.18597,0.18756,0.18633,0.18837,0.18671,0.18662,0.18671,0.18673,0.18711,0.18797,0.18629,0.18716,0.18726,0.18511,0.18764,0.19314,0.19264,0.19259,0.19187,0.19294,0.19379,0.19322,0.1933,0.19252,0.19364,0.65736,0.69476,0.19255,0.1917,0.19223,0.19394,0.18562,0.18622,0.18558,0.18742,0.18719,0.18713,0.187,0.18609,0.18624,0.18692,0.18645,0.18712,0.18589,0.18731,0.18713,0.18595,0.18688,0.18705,0.18712,0.19315,0.19153,0.19232,0.19305,0.19289,0.19258,0.19266,0.1923,0.19216,0.1932,0.19239,0.1916,0.1931,0.19238,0.19215,0.19234,0.19244,0.18661,0.18666,0.18714,0.18595,0.18685,0.18713,0.18553,0.18654,0.1866,0.18657,0.18574,0.18515,0.18668,0.18561,0.18615,0.18852,0.19289,0.19289,0.19243,0.19262,0.19313,0.19242,0.19164,0.1921,0.19223,0.19259,0.19323,0.19178,0.19246,0.19122,0.19187,0.19116

,0.19286,0.19157,0.19297,0.18752,0.18596,0.18731,0.18667,0.18618,0.18645,0.1861,0.18756,0.18695,0.18762,0.18468,0.18681,0.18567,0.19242,0.1924,0.19223,0.19282,0.19169,0.19246,0.19293,0.19174,0.19337,0.19304,0.19361,0.19303,0.19132,0.1926,0.19234,0.19204,0.19287,0.19277,0.19264,0.19305,0.19333,0.18641,0.18579,0.18625,0.18723,0.1863,0.18774,0.18782,0.18733,0.18679,0.19161,0.19262,0.19171,0.19218,0.19308,0.19247,0.19179,0.19228,0.19261,0.19224,0.1933,0.19171,0.19196,0.19219,0.19292,0.19268,0.19109,0.1921,0.19298,0.19236,0.19181,0.1918,0.19266,0.19218,0.19295,0.18683,0.18499,0.18596,0.18695,0.19278,0.19228,0.19236,0.19218,0.19347,0.19227,0.19297,0.1924,0.19293,0.19345,0.19267,0.19286,0.19278,0.19217,0.19226,0.19251,0.19237,0.19318,0.19306,0.1927,0.19187,0.19226,0.19141,0.19298,0.19237,0.19274,0.19322,0.19194,0.19252,0.19288,0.19283,0.19238,0.19168,0.19229,0.19214,0.19326,0.19231,0.19193,0.19286,0.19292,0.19287,0.19224,0.19272,0.19283,0.19247,0.19206,0.19246,0.19366,0.19232,0.19329,0.19248,0.1917,0.19284,0.19341,0.19146,0.19237,0.19168,0.19243,0.19253,0.19156,0.1928,0.19241,0.19335,0.19188,0.1909,0.19161,0.19222,0.1926,0.19295,0.1923,0.19311,0.19393,0.19247,0.19235,0.19272,0.19195,0.19265,0.19206,0.1922,0.1925,0.19328,0.19264,0.19186,0.19271,0.1936,0.19342,0.19223,0.19216,0.19211,0.19253,0.19218,0.19252,0.19223,0.19268,0.19211,0.19292,0.19338,0.19331,0.19228,0.19275,0.19177,0.19279,0.19286,0.19231,0.1925,0.19257,0.19408,0.19241,0.19225,0.1913,0.19274,0.19299,0.19304,0.19276,0.19245,0.19267,0.19256,0.19156,0.19341,0.1924,0.19289,0.19189,0.1929,0.19274,0.19351,0.19279,0.19143,0.19325,0.19282,0.19295,0.19211,0.19359,0.19202,0.19324,0.19213,0.19255,0.19276,0.19175,0.19207,0.19105,0.19373,0.193,0.1926,0.19266,0.19346,0.19245,0.19235,0.19176,0.19234,0.19136,0.19291,0.19216,0.19366,0.19275,0.19302,0.1924,0.19125,0.19309,0.19287,0.19332,0.19221,0.19287,0.19335,0.19288,0.19244,0.19287,0.19224,0.19207,0.19291,0.19156,0.19184,0.19335,0.19217,0.19317,0.1924,0.1916,0.19128,0.19296,0.19182,0.19312,0.19198,0.19234,0.19118,0.19184,0.19163,0.19267,0.1929,0.19249,0.19279,0.19231,0.19249,0.19214,0.19173,0.19283,0.19265  
0.17541,0.17465,0.17548,0.17493,0.17597,0.1748,0.17542,0.17586,0.17484,0.17561,0.17489,0.17521,0.17532,0.17503,0.17484,0.17566,0.17591,0.17567,0.17502,0.17545,0.45877,0.50182,0.53611,0.41049,0.17468,0.17555,0.17513,0.17554,0.17449,0.17589,0.17461,0.17564,0.17604,0.17444,0.17501,0.17502,0.17557,0.1756,0.17562,0.82095,0.48895,0.50584,0.49884,0.49836,0.52072,0.54039,0.17525,0.17496,0.17547,0.1753,0.17574,0.17531,0.17517,0.17576,0.17476,0.17427,0.17506,0.17498,0.17517,0.17518,0.17518,0.8301,0.82058,0.45855,0.59231,0.5012,0.50255,0.53289,0.5399,0.52583,0.49219,0.17492,0.17393,0.17551,0.1754,0.17519,0.17441,0.17547,0.17486,0.17446,0.17456,0.17495,0.17528,0.17576,0.17508,0.17519,0.81878,0.82461,0.82547,0.47606,0.44741,0.50226,0.4979,0.50016,0.49906,0.49632,0.43236,0.55515,0.17413,0.17517,0.17562,0.17541,0.17523,0.17578,0.17589,0.17549,0.1747,0.17588,0.17549,0.17522,0.17503,0.17489,0.17566,0.17496,0.82918,0.82082,0.81809,0.82879,0.46555,0.52328,0.58267,0.4999,0.49724,0.50323,0.47482,0.51594,0.42514,0.51038,0.17467,0.17572,0.17569,0.17534,0.1754,0.17524,0.17485,0.1756,0.17505,0.17512,0.17588,0.17484,0.17553,0.17465,0.1747,0.17538,0.83582,0.82809,0.82258,0.82852,0.82397,0.82823,0.46168,0.50384,0.53004,0.47948,0.52847,0.52022,0.49638,0.50136,0.5567,0.50174,0.17562,0.17474,0.17558,0.17501,0.17524,0.17491,0.17527,0.17488,0.1752,0.17507,0.17467,0.1753,0.17583,0.17487,0.17537,0.17414,0.17482,0.84584,0.82597,0.82205,0.82707,0.83213,0.82636,0.47279,0.55462,0.5506



,0.49687,0.49199,0.48621,0.52234,0.59825,0.49946,0.51304,0.49831,0.17512,0.17507,0.17577,0.17443,0.17563,0.17565,0.17572,0.17536,0.17541,0.17541,0.17497,0.17566,0.17502,0.16719,0.1661,0.16599,0.17564,0.82795,0.8268,0.82546,0.82543,0.83084,0.82029,0.82507,0.4991,0.52336,0.50125,0.54009,0.47662,0.48882,0.50539,0.37416,0.4852,0.49745,0.48171,0.17559,0.17548,0.1755,0.17588,0.1755,0.17559,0.17472,0.17441,0.17485,0.17538,0.17495,0.16419,0.16609,0.16739,0.16405,0.16573,0.16534,0.17517,0.82598,0.82201,0.83511,0.83095,0.82945,0.81685,0.84618,0.48105,0.55032,0.46572,0.5386,0.50216,0.50187,0.50404,0.5042,0.48746,0.49651,0.45855,0.17554,0.17465,0.17434,0.17486,0.17543,0.17513,0.17592,0.17541,0.17527,0.16668,0.1656,0.16798,0.16802,0.16744,0.16612,0.16585,0.16572,0.16675,0.17546,0.82238,0.82361,0.81928,0.82906,0.82945,0.82622,0.82769,0.48714,0.51112,0.48479,0.50192,0.50597,0.51969,0.50179,0.51807,0.51444,0.50032,0.49986,0.48815,0.17421,0.17608,0.17551,0.17643,0.17571,0.17501,0.16451,0.16519,0.16633,0.16578,0.16671,0.16708,0.16644,0.16467,0.16598,0.16514,0.16834,0.16645,0.82637,0.83199,0.83095,0.82382,0.82918,0.8194,0.83778,0.49856,0.47407,0.4991,0.49881,0.4849,0.47406,0.50277,0.60244,0.45486,0.50427,0.50561,0.48394,0.17547,0.17557,0.17465,0.16694,0.16595,0.16663,0.16668,0.1661,0.16745,0.16629,0.16698,0.16692,0.16684,0.16937,0.16691,0.16644,0.1661,0.16601,0.83357,0.83531,0.83041,0.82264,0.8274,0.83424,0.82115,0.81736,0.82732,0.53541,0.49716,0.50302,0.47144,0.41839,0.50203,0.5603,0.54824,0.3619,0.47718,0.51742,0.16577,0.16536,0.16542,0.16513,0.16577,0.16767,0.16655,0.16601,0.16311,0.16584,0.16612,0.16706,0.16556,0.16553,0.16717,0.16732,0.16605,0.16737,0.84275,0.83336,0.82934,0.8394,0.81955,0.82302,0.8401,0.83645,0.82169,0.46845,0.49626,0.4015,0.43558,0.32867,0.39767,0.39599,0.37546,0.40963,0.39691,0.39445,0.16559,0.16702,0.16601,0.16732,0.16606,0.16636,0.16449,0.16534,0.1667,0.16511,0.16715,0.16735,0.16726,0.16529,0.16628,0.16601,0.16627,0.1658,0.82741,0.82877,0.83742,0.82007,0.82859,0.82556,0.8396,0.82754,0.83543,0.51082,0.37867,0.34062,0.38206,0.4149,0.36621,0.39628,0.36615,0.40318,0.35486,0.40082,0.16304,0.16647,0.16638,0.16837,0.16636,0.16544,0.16571,0.16584,0.16483,0.16533,0.16564,0.16556,0.16619,0.16725,0.16315,0.16655,0.16612,0.16711,0.83877,0.82434,0.83132,0.83044,0.83371,0.83715,0.82683,0.49472,0.47231,0.49514,0.44848,0.44378,0.38304,0.41934,0.41168,0.39226,0.39161,0.37476,0.34908,0.3868,0.16448,0.16626,0.16903,0.1665,0.16616,0.16818,0.16243,0.16519,0.16724,0.16713,0.16622,0.16532,0.1659,0.16913,0.1656,0.16789,0.16596,0.16344,0.82806,0.82792,0.82023,0.82442,0.83482,0.82784,0.47509,0.49813,0.53411,0.59384,0.39051,0.39842,0.34758,0.2898,0.40732,0.43954,0.39879,0.3465,0.38995,0.3558,0.16673,0.16518,0.16592,0.16652,0.16725,0.16763,0.16636,0.16638,0.16687,0.16547,0.16555,0.165,0.16569,0.16804,0.16685,0.16485,0.16444,0.16638,0.81929,0.83509,0.82017,0.81913,0.82676,0.46607,0.44624,0.50933,0.49635,0.47889,0.41389,0.36818,0.41862,0.42313,0.34841,0.37067,0.3882,0.43582,0.4155,0.41027,0.16631,0.16754,0.1639,0.16337,0.16607,0.16483,0.16651,0.16708,0.16691,0.16584,0.1666,0.16649,0.1668,0.16539,0.16673,0.16506,0.16564,0.16593,0.82306,0.81937,0.84058,0.42149,0.52285,0.56115,0.46272,0.53242,0.48423,0.50061,0.53415,0.40502,0.38776,0.39927,0.28827,0.38649,0.3697,0.39029,0.43709,0.38444,0.16587,0.16571,0.16515,0.16761,0.16677,0.16594,0.16716,0.16586,0.16548,0.16637,0.16601,0.1682,0.16643,0.16639,0.1673,0.16617,0.1662,0.16721,0.83654,0.40722,0.4603,0.41902,0.45912,0.495,0.50023,0.45239,0.49205,0.49321,0.38653,0.31819,0.39606,0.37813,0.36587,0.35731,0.3345,0.40083,0.38352,0.16608,0.16798,0.16761,0.167

01,0.16627,0.1661,0.16442,0.1651,0.16867,0.16627,0.16378,0.16654,0.167  
21,0.16936,0.16618,0.16703,0.16709,0.15744,0.48084,0.49369,0.43224,0.4  
9881,0.50403,0.46038,0.51005,0.41631,0.4918,0.49286,0.35986,0.36352,0.  
40643,0.43341,0.38551,0.30335,0.42675,0.42584,0.39124,0.16566,0.16495,  
0.16536,0.16699,0.16629,0.16592,0.1674,0.16645,0.16688,0.16553,0.16397  
,0.16626,0.1652,0.16451,0.16573,0.16674,0.16522,0.15743,0.49987,0.5004  
8,0.45159,0.53678,0.41319,0.47884,0.49292,0.60425,0.50668,0.47943,0.38  
834,0.38664,0.36237,0.33251,0.38847,0.39667,0.35997,0.3828,0.16599,0.1  
6581,0.16616,0.16509,0.16838,0.16531,0.16713,0.16638,0.16646,0.16577,0  
.16672,0.16687,0.16649,0.16554,0.16692,0.16425,0.16523,0.16653,0.15676  
,0.48148,0.42944,0.51122,0.474,0.49731,0.52386,0.41305,0.52995,0.48178  
,0.49911,0.40219,0.39012,0.42398,0.41537,0.4274,0.42307,0.39994,0.3838  
5,0.16563,0.16522,0.17048,0.16609,0.16755,0.16615,0.16305,0.16683,0.16  
707,0.16812,0.16611,0.16788,0.16526,0.16691,0.16784,0.1659,0.16574,0.1  
5738,0.15781,0.15678,0.50438,0.48762,0.41383,0.4945,0.48793,0.4948,0.4  
8666,0.53609,0.48965,0.38314,0.386,0.33657,0.38617,0.38107,0.41395,0.1  
6633,0.16632,0.16761,0.16551,0.16752,0.16595,0.1668,0.16638,0.16803,0.  
16674,0.16459,0.16636,0.16626,0.16587,0.16699,0.16848,0.16629,0.16649,  
0.15561,0.15681,0.15685,0.15721,0.49671,0.4637,0.49824,0.45184,0.47722  
,0.54454,0.53644,0.4911,0.34205,0.38518,0.37895,0.3669,0.16464,0.16736  
,0.16573,0.16795,0.16643,0.16564,0.16614,0.1671,0.16693,0.16424,0.1641  
,0.16625,0.16601,0.16649,0.16607,0.16596,0.16378,0.16538,0.16639,0.166  
92,0.15744,0.15683,0.1565,0.15732,0.15859,0.15691,0.60579,0.46375,0.49  
582,0.49423,0.48943,0.56949,0.44098,0.59547,0.16401,0.16683,0.16641,0.  
16653,0.16613,0.16578,0.16451,0.16589,0.16569,0.16774,0.16479,0.16625,  
0.16709,0.16696,0.16536,0.16597,0.16465,0.1665,0.1652,0.16674,0.17075,  
0.16659,0.16624,0.15639,0.15736,0.15745,0.15725,0.15679,0.15848,0.4881  
6,0.49601,0.53896,0.508,0.49316,0.15817,0.15748,0.16682,0.1677,0.16696  
,0.16767,0.16866,0.16575,0.16704,0.16435,0.16683,0.16652,0.1659,0.1664  
,0.16476,0.16582,0.16468,0.16577,0.16727,0.16598,0.16668,0.16584,0.167  
14,0.15784,0.15749,0.15728,0.15694,0.15711,0.15871,0.15766,0.15756,0.1  
5736,0.15811,0.49532,0.52049,0.15755,0.15621,0.15646,0.15819,0.16592,0  
.16606,0.16647,0.16727,0.16614,0.16656,0.16598,0.16432,0.16574,0.16657  
,0.16428,0.1664,0.16528,0.16921,0.16642,0.16571,0.16389,0.16655,0.1669  
9,0.15773,0.15675,0.15677,0.15767,0.15756,0.15736,0.15741,0.15686,0.15  
72,0.15785,0.15712,0.15658,0.15752,0.15722,0.15718,0.15687,0.15701,0.1  
6649,0.16724,0.1667,0.16894,0.16775,0.16639,0.16559,0.16622,0.16493,0.  
16495,0.16669,0.16598,0.16651,0.16757,0.16616,0.16173,0.15757,0.15761,  
0.15709,0.15703,0.15783,0.15746,0.1568,0.15715,0.15682,0.1575,0.15848,  
0.15662,0.15723,0.15617,0.15622,0.156,0.15765,0.15654,0.1575,0.16531,0  
.16564,0.16626,0.16724,0.16586,0.16653,0.16829,0.16386,0.16539,0.16546  
,0.16652,0.16613,0.16501,0.15734,0.15718,0.15646,0.15772,0.15658,0.157  
2,0.15747,0.15688,0.15756,0.15807,0.15861,0.15744,0.15634,0.15758,0.15  
7,0.15688,0.15746,0.1576,0.15707,0.1583,0.15763,0.16783,0.16678,0.1652  
1,0.16536,0.16622,0.16328,0.16599,0.16454,0.16647,0.15664,0.15743,0.15  
668,0.1564,0.15793,0.15734,0.15692,0.15707,0.15753,0.15723,0.15801,0.1  
5671,0.15706,0.15724,0.15727,0.15743,0.15595,0.15707,0.15772,0.15747,0  
.15644,0.15651,0.15792,0.15662,0.15831,0.16291,0.1672,0.16679,0.1657,0  
.15744,0.15677,0.15727,0.15652,0.15782,0.15691,0.15771,0.15712,0.15761  
,0.15822,0.15755,0.15783,0.1576,0.15674,0.15691,0.15745,0.15693,0.1578  
9,0.1573,0.15768,0.15695,0.15676,0.15625,0.15757,0.15759,0.1571,0.1577  
5,0.15701,0.15705,0.15757,0.15736,0.15681,0.15641,0.15751,0.15677,0.15

783,0.15707,0.1568,0.1574,0.15729,0.1573,0.15759,0.15723,0.15745,0.156  
97,0.15651,0.15722,0.15846,0.15664,0.15807,0.15746,0.15666,0.15734,0.1  
5791,0.1564,0.15699,0.15622,0.15726,0.15741,0.15638,0.15724,0.15776,0.  
15802,0.15666,0.15543,0.1564,0.15682,0.15745,0.15745,0.15707,0.15816,0  
.15831,0.15714,0.15744,0.15722,0.15666,0.15758,0.15693,0.1573,0.15698,  
0.15787,0.15712,0.156,0.15727,0.15819,0.15779,0.15733,0.15697,0.15725,  
0.1571,0.15733,0.1574,0.15693,0.15746,0.15681,0.1573,0.15821,0.15749,0  
.15728,0.15752,0.15701,0.15741,0.15754,0.15697,0.15724,0.15713,0.15883  
,0.157,0.15692,0.156,0.15755,0.15771,0.15793,0.15756,0.15712,0.1571,0.  
15721,0.15619,0.15764,0.15726,0.15841,0.15655,0.15776,0.15735,0.15853,  
0.15748,0.15591,0.15796,0.15739,0.15748,0.15703,0.15808,0.15654,0.1578  
3,0.15705,0.1575,0.15714,0.15682,0.15635,0.15581,0.15836,0.15713,0.157  
05,0.1575,0.15804,0.15714,0.15701,0.15614,0.15673,0.15591,0.15782,0.15  
753,0.15792,0.15722,0.15775,0.1569,0.15621,0.15807,0.15745,0.15783,0.1  
5684,0.15755,0.15813,0.15748,0.15706,0.15723,0.157,0.15659,0.15776,0.1  
5669,0.1568,0.1584,0.15666,0.15786,0.15726,0.15664,0.15576,0.15789,0.1  
5698,0.15791,0.15651,0.15722,0.1559,0.15708,0.15576,0.15718,0.15766,0.  
15722,0.15805,0.15718,0.15724,0.15706,0.15626,0.15735,0.15769  
0.16253,0.16189,0.16249,0.16185,0.16306,0.16197,0.16282,0.16305,0.1621  
9,0.16271,0.16204,0.16247,0.16265,0.16234,0.16251,0.16266,0.16334,0.16  
256,0.16217,0.16235,0.37505,0.40824,0.43354,0.33904,0.16186,0.16291,0.  
1622,0.1627,0.16172,0.16316,0.162,0.16292,0.16348,0.16148,0.16235,0.16  
208,0.16269,0.16269,0.16286,0.64433,0.3977,0.41161,0.40271,0.40247,0.4  
1923,0.43616,0.16229,0.16187,0.16268,0.16243,0.16293,0.16235,0.16228,0  
.16308,0.16196,0.16132,0.16228,0.16209,0.1624,0.16254,0.16227,0.652,0.  
64363,0.37535,0.47405,0.40534,0.40638,0.43025,0.43281,0.42358,0.39934,  
0.1616,0.16157,0.16259,0.16253,0.16222,0.16173,0.16268,0.16174,0.1617,  
0.16206,0.162,0.16263,0.1631,0.16227,0.16245,0.64037,0.64956,0.64889,0  
.387,0.36502,0.40896,0.40533,0.40468,0.40473,0.40276,0.3556,0.44703,0.  
16147,0.16213,0.16255,0.16249,0.16258,0.16346,0.16262,0.16271,0.16207,  
0.16287,0.16236,0.16241,0.16239,0.16204,0.16307,0.16219,0.64745,0.643,  
0.64503,0.65544,0.37984,0.42249,0.46516,0.40325,0.40198,0.4081,0.38796  
,0.41838,0.34815,0.41424,0.16201,0.16301,0.16324,0.16256,0.16232,0.162  
28,0.16179,0.16259,0.16272,0.16245,0.16304,0.16229,0.16285,0.16168,0.1  
6174,0.16277,0.65518,0.65001,0.64397,0.65443,0.6458,0.65022,0.37714,0.  
40866,0.42897,0.39066,0.42865,0.41886,0.40298,0.40708,0.44682,0.40585,  
0.16281,0.16218,0.16256,0.1621,0.16246,0.16222,0.16269,0.16185,0.16261  
,0.16242,0.16161,0.16248,0.16312,0.16136,0.16243,0.16131,0.1621,0.6603  
7,0.65053,0.64404,0.65036,0.65746,0.64839,0.38588,0.44802,0.4421,0.401  
86,0.4001,0.39458,0.42092,0.48099,0.40559,0.41592,0.40403,0.16227,0.16  
23,0.16291,0.16166,0.1631,0.16273,0.16256,0.16243,0.16244,0.16254,0.16  
272,0.16262,0.16211,0.14582,0.14442,0.1443,0.16249,0.645,0.65177,0.652  
18,0.64501,0.65475,0.642,0.6481,0.40374,0.42339,0.40735,0.43796,0.3892  
6,0.39824,0.41233,0.3124,0.39532,0.40326,0.39452,0.16259,0.16252,0.162  
25,0.16287,0.16237,0.16273,0.16205,0.16164,0.16187,0.16258,0.1625,0.14  
083,0.14369,0.14676,0.14057,0.14383,0.14257,0.16202,0.64947,0.64461,0.  
65958,0.65616,0.65447,0.64099,0.66858,0.39199,0.44342,0.37905,0.43384,  
0.40593,0.40866,0.40733,0.40855,0.39625,0.40209,0.37245,0.16259,0.1616  
6,0.1615,0.16198,0.16272,0.16202,0.16308,0.16251,0.16248,0.14544,0.143  
88,0.14787,0.14828,0.14709,0.14444,0.14272,0.14384,0.14512,0.1627,0.64  
549,0.64669,0.64623,0.64936,0.65232,0.65072,0.6489,0.39465,0.41474,0.3  
9272,0.40744,0.40956,0.42148,0.40719,0.41931,0.41596,0.40745,0.40548,0

.39743,0.16102,0.16284,0.16255,0.16388,0.16267,0.1622,0.14111,0.14298,  
0.14453,0.14486,0.14501,0.14612,0.14512,0.14173,0.14445,0.14202,0.1482  
,0.14463,0.64508,0.65559,0.65188,0.652,0.65174,0.64339,0.65845,0.40261  
,0.38723,0.40379,0.40501,0.39491,0.3872,0.40768,0.48483,0.37311,0.4096  
9,0.40995,0.39325,0.16239,0.16282,0.16202,0.14603,0.14337,0.14461,0.14  
474,0.14464,0.14555,0.14438,0.1461,0.14512,0.14499,0.15074,0.14604,0.1  
4531,0.14341,0.14401,0.6547,0.65861,0.6552,0.65092,0.65059,0.65764,0.6  
4177,0.6428,0.65082,0.43303,0.40617,0.40732,0.38425,0.34343,0.40645,0.  
45213,0.43971,0.30251,0.39004,0.41652,0.14363,0.14334,0.14366,0.14319,  
0.14318,0.14613,0.1451,0.14438,0.1392,0.14401,0.14492,0.14595,0.14293,  
0.1436,0.14641,0.14575,0.14415,0.14608,0.6644,0.65516,0.65052,0.66151,  
0.64358,0.64399,0.65974,0.66011,0.6461,0.38166,0.40363,0.32673,0.35285  
,0.26745,0.32216,0.31963,0.3018,0.3286,0.32089,0.31711,0.14399,0.14623  
,0.14428,0.14708,0.14363,0.14469,0.14132,0.14283,0.14561,0.14255,0.145  
48,0.14544,0.14613,0.14195,0.14428,0.14384,0.14387,0.14417,0.65119,0.6  
4961,0.65765,0.64466,0.64962,0.64695,0.65975,0.65069,0.65942,0.40109,0.  
.30741,0.2767,0.30968,0.33412,0.29728,0.32051,0.29694,0.32308,0.28955,  
0.32298,0.13829,0.14503,0.14432,0.14943,0.14535,0.14354,0.1449,0.14406  
,0.14217,0.14328,0.14277,0.14379,0.14434,0.14512,0.13896,0.14481,0.144  
14,0.14509,0.66211,0.65132,0.6534,0.65422,0.65475,0.66109,0.65005,0.39  
052,0.37431,0.39178,0.36257,0.35476,0.31083,0.33437,0.33194,0.3174,0.3  
1751,0.30085,0.28398,0.31439,0.14202,0.1446,0.14926,0.14446,0.14429,0.  
14844,0.13798,0.14259,0.14595,0.14511,0.14435,0.14341,0.14425,0.14948,  
0.1436,0.14801,0.14404,0.13887,0.65082,0.65202,0.64652,0.6463,0.65516,  
0.64802,0.37647,0.39245,0.42103,0.46658,0.30873,0.32255,0.282,0.24002,  
0.33023,0.35246,0.32177,0.28121,0.31518,0.28975,0.14665,0.14329,0.1441  
,0.14456,0.14651,0.14698,0.14359,0.14437,0.14521,0.14339,0.14272,0.142  
16,0.14321,0.14703,0.14475,0.14119,0.13996,0.14497,0.6468,0.66019,0.64  
317,0.64172,0.64929,0.36949,0.3536,0.40271,0.39096,0.37864,0.32595,0.2  
9756,0.34145,0.34242,0.28108,0.30127,0.31622,0.35307,0.33487,0.3296,0.  
1454,0.14642,0.14041,0.13897,0.14408,0.14174,0.1448,0.14492,0.14457,0.  
14369,0.14524,0.1449,0.14586,0.14289,0.14512,0.14208,0.14394,0.14379,0.  
.64406,0.64674,0.6593,0.33175,0.4123,0.44202,0.3632,0.41871,0.38067,0.  
39418,0.41995,0.32794,0.31276,0.32317,0.23841,0.31421,0.30068,0.31629,  
0.35338,0.31069,0.1443,0.14358,0.14201,0.1466,0.14496,0.14326,0.14526,  
0.14427,0.14374,0.14483,0.14425,0.14821,0.14489,0.14437,0.14548,0.1442  
3,0.14368,0.14671,0.66341,0.32166,0.36301,0.33215,0.36492,0.39211,0.39  
523,0.35784,0.38567,0.38964,0.3132,0.26104,0.31872,0.30551,0.29764,0.2  
9168,0.27263,0.32499,0.31144,0.14473,0.14698,0.14649,0.14499,0.14435,0.  
.14506,0.14187,0.14237,0.14933,0.14386,0.14061,0.14472,0.14536,0.15045  
,0.14432,0.14642,0.14601,0.12663,0.37867,0.38821,0.34176,0.39281,0.397  
,0.36299,0.40391,0.32919,0.38757,0.38943,0.29222,0.29464,0.32896,0.348  
23,0.31153,0.24858,0.34503,0.34465,0.31845,0.14267,0.14131,0.14295,0.1  
4488,0.14475,0.14436,0.14699,0.14472,0.14533,0.1434,0.14089,0.14461,0.  
14354,0.14138,0.14373,0.14578,0.14281,0.12658,0.39352,0.39338,0.35348,  
0.42313,0.3269,0.37971,0.39072,0.47619,0.40006,0.37818,0.31223,0.31273  
,0.29348,0.2725,0.31373,0.32179,0.29211,0.30875,0.14414,0.14378,0.1453  
3,0.14306,0.14793,0.14346,0.14544,0.14521,0.14428,0.14376,0.14471,0.14  
506,0.14403,0.14375,0.14491,0.1399,0.14235,0.14487,0.12619,0.38055,0.3  
3911,0.40364,0.37493,0.39041,0.41253,0.3243,0.4201,0.38057,0.39203,0.3  
2486,0.31567,0.34297,0.33762,0.3442,0.34275,0.32413,0.31001,0.14338,0.  
14279,0.15335,0.14425,0.14725,0.14402,0.13869,0.1463,0.14704,0.1477,0.

14428,0.1476,0.14253,0.14498,0.14793,0.14396,0.14435,0.12625,0.12718,0.12616,0.39975,0.38224,0.3251,0.38886,0.38443,0.39297,0.38342,0.42463,0.3862,0.30936,0.3118,0.27613,0.31222,0.31055,0.33373,0.14423,0.14473,0.14652,0.14257,0.14664,0.14371,0.14547,0.14462,0.14835,0.14537,0.14043,0.14458,0.1445,0.14386,0.14519,0.14779,0.14492,0.14458,0.12505,0.12614,0.12593,0.12685,0.39459,0.36485,0.39386,0.35702,0.37569,0.42851,0.42323,0.3879,0.27219,0.31406,0.30737,0.29838,0.14181,0.1466,0.14422,0.14831,0.14493,0.14337,0.14405,0.14535,0.14557,0.14069,0.14026,0.1449,0.14369,0.14519,0.14426,0.14415,0.1389,0.14346,0.14494,0.14527,0.12641,0.12606,0.12521,0.12681,0.12708,0.12603,0.47757,0.3664,0.38958,0.38942,0.3865,0.44952,0.34777,0.46924,0.13981,0.14587,0.14387,0.14493,0.14409,0.14399,0.14172,0.14346,0.14423,0.14712,0.14225,0.14416,0.14528,0.14491,0.14233,0.14361,0.14226,0.14509,0.1417,0.14609,0.15309,0.14527,0.14365,0.1255,0.12719,0.12658,0.12613,0.12581,0.12745,0.38417,0.39267,0.42606,0.40143,0.38899,0.12736,0.12647,0.14482,0.14752,0.14578,0.1465,0.14839,0.14408,0.14587,0.14058,0.14559,0.14334,0.14423,0.14471,0.14218,0.14326,0.14222,0.14318,0.14665,0.14385,0.14478,0.14448,0.14515,0.12667,0.12735,0.12604,0.12559,0.12575,0.12768,0.12675,0.12652,0.12635,0.12781,0.39046,0.41131,0.12666,0.12534,0.12509,0.12745,0.14511,0.14437,0.14521,0.14538,0.14401,0.14507,0.14391,0.14158,0.14389,0.14456,0.1417,0.14401,0.14338,0.1485,0.14456,0.14381,0.14069,0.14522,0.14486,0.12693,0.12577,0.12587,0.12665,0.127,0.12666,0.12636,0.12578,0.12655,0.12686,0.12661,0.12566,0.12685,0.12628,0.12696,0.12627,0.1257,0.14528,0.14574,0.14489,0.14861,0.1461,0.14441,0.14391,0.14456,0.14224,0.14238,0.14569,0.14489,0.14447,0.1469,0.14443,0.13614,0.12672,0.12655,0.12643,0.12621,0.12697,0.1267,0.12572,0.12653,0.12633,0.12621,0.12761,0.12626,0.12616,0.12565,0.12532,0.12559,0.12666,0.12536,0.12659,0.14191,0.14355,0.14366,0.14591,0.1442,0.14509,0.14786,0.13993,0.14262,0.1428,0.14603,0.14402,0.14281,0.12622,0.12597,0.12599,0.12679,0.12579,0.12619,0.12649,0.12613,0.12677,0.1269,0.12772,0.12684,0.12585,0.12672,0.12639,0.12596,0.12668,0.12682,0.12617,0.12709,0.12657,0.14695,0.14564,0.14328,0.1428,0.1451,0.13854,0.1435,0.14119,0.14459,0.12576,0.12681,0.12594,0.12593,0.12708,0.1263,0.12668,0.12627,0.12616,0.12609,0.12698,0.12551,0.12635,0.12635,0.12648,0.12607,0.12539,0.12593,0.12665,0.12672,0.12581,0.12557,0.12675,0.12566,0.12737,0.13926,0.14681,0.14577,0.14336,0.12682,0.12624,0.12657,0.12589,0.12732,0.12604,0.12698,0.12656,0.12631,0.12726,0.12666,0.12657,0.12645,0.12619,0.1258,0.12685,0.12632,0.12704,0.12654,0.12653,0.12607,0.1261,0.12571,0.12677,0.12653,0.1262,0.12714,0.12608,0.12618,0.12652,0.12666,0.12578,0.1256,0.12657,0.12626,0.1271,0.12662,0.12613,0.12672,0.1266,0.12623,0.12705,0.12619,0.12662,0.12619,0.12562,0.12605,0.12791,0.12598,0.1272,0.12673,0.12545,0.12617,0.12705,0.12554,0.12608,0.12575,0.12662,0.12624,0.12519,0.12648,0.12751,0.12685,0.12575,0.12539,0.12611,0.12559,0.1271,0.12641,0.12616,0.12724,0.12678,0.12612,0.12652,0.12708,0.12564,0.12635,0.12627,0.12671,0.12581,0.12707,0.12663,0.12506,0.12557,0.12704,0.12716,0.12625,0.12594,0.12658,0.12615,0.12635,0.12676,0.12609,0.12673,0.1258,0.12636,0.12705,0.12622,0.12637,0.12637,0.12625,0.12676,0.12661,0.1265,0.12626,0.12671,0.1283,0.12652,0.12615,0.12528,0.12655,0.12695,0.12706,0.12709,0.12637,0.12645,0.12602,0.12519,0.1269,0.12638,0.12777,0.12608,0.12694,0.12591,0.12749,0.12697,0.12513,0.1272,0.12622,0.12666,0.12564,0.12712,0.12564,0.12709,0.12623,0.12697,0.12678,0.12598,0.12561,0.12504,0.12803,0.126,0.1263,0.12671,0.12697,0.12623,0.12612,0.12565,0.12583,0.12523,0.12686,0.12662

,0.12638,0.12669,0.12727,0.12625,0.12558,0.12754,0.12631,0.12698,0.12576,0.1268,0.12758,0.12661,0.12584,0.12622,0.12606,0.12598,0.12706,0.12576,0.12597,0.12766,0.1261,0.12709,0.12653,0.12565,0.12503,0.12676,0.12624,0.12702,0.12565,0.12639,0.12505,0.1264,0.12506,0.12642,0.1269,0.12646,0.12722,0.12686,0.12688,0.12623,0.12541,0.12664,0.12721  
0.14727,0.14669,0.14756,0.14664,0.14821,0.14703,0.14788,0.14794,0.14708,0.14776,0.14697,0.14723,0.14782,0.1472,0.1477,0.1476,0.14842,0.14759,0.14739,0.14723,0.31789,0.34758,0.36644,0.29155,0.14705,0.14777,0.14738,0.1478,0.14676,0.14824,0.14703,0.14806,0.14833,0.14663,0.14767,0.14699,0.14757,0.14765,0.14802,0.53683,0.34039,0.34892,0.34188,0.34152,0.35489,0.3701,0.14701,0.14688,0.14791,0.14735,0.148,0.14731,0.147,0.14787,0.14705,0.14616,0.14728,0.14709,0.14752,0.14778,0.14734,0.54365,0.53695,0.32012,0.40072,0.34338,0.3445,0.36682,0.36484,0.35853,0.33814,0.1469,0.14644,0.1474,0.14742,0.14729,0.14683,0.14791,0.14673,0.14687,0.14704,0.14678,0.14812,0.14804,0.14733,0.14765,0.53458,0.54133,0.5361,0.32821,0.31042,0.34616,0.34193,0.34314,0.34394,0.34031,0.3043,0.37997,0.14671,0.14752,0.14778,0.14743,0.14767,0.14865,0.14767,0.14779,0.14734,0.14786,0.14733,0.14732,0.14761,0.14711,0.14795,0.14705,0.538,0.53679,0.53406,0.5417,0.32099,0.35876,0.39131,0.34176,0.34109,0.34635,0.3319,0.35344,0.29671,0.352,0.14726,0.14823,0.14822,0.14802,0.14732,0.14745,0.14714,0.1478,0.14782,0.1474,0.14839,0.14739,0.14801,0.14646,0.14668,0.14816,0.54898,0.53822,0.53987,0.54408,0.54107,0.53899,0.31997,0.34691,0.36235,0.33086,0.36271,0.35418,0.34077,0.34503,0.37739,0.34281,0.14775,0.1474,0.14743,0.14743,0.14764,0.14743,0.14762,0.14708,0.14731,0.1477,0.14658,0.14783,0.14794,0.1465,0.14722,0.14656,0.14695,0.55454,0.54437,0.53253,0.54254,0.54956,0.53963,0.3269,0.37783,0.37293,0.33983,0.34112,0.33703,0.35702,0.40391,0.34597,0.35206,0.33995,0.14759,0.14732,0.14774,0.14675,0.14804,0.14778,0.14724,0.14721,0.14734,0.14749,0.14787,0.1476,0.14743,0.12683,0.12569,0.12565,0.14758,0.53794,0.54259,0.54359,0.5432,0.54395,0.53551,0.54067,0.34088,0.35848,0.34698,0.37063,0.33257,0.33718,0.34995,0.26912,0.33553,0.34396,0.33672,0.14727,0.14751,0.14734,0.14763,0.14742,0.14793,0.14697,0.14668,0.14687,0.14754,0.1472,0.12125,0.12436,0.12772,0.12112,0.12479,0.12284,0.14719,0.54038,0.53675,0.54977,0.5509,0.54259,0.53217,0.56287,0.33248,0.37483,0.32192,0.36704,0.3471,0.3484,0.34552,0.34657,0.33534,0.34203,0.31662,0.14751,0.14681,0.14646,0.1469,0.14782,0.14705,0.14758,0.14761,0.1474,0.12657,0.12481,0.13006,0.13033,0.12851,0.12534,0.12334,0.12447,0.12675,0.14764,0.53794,0.53979,0.53509,0.53968,0.54068,0.54216,0.53791,0.33593,0.35173,0.33404,0.3437,0.34907,0.35693,0.34447,0.35509,0.35296,0.34333,0.34377,0.33857,0.14593,0.14761,0.14759,0.14889,0.14781,0.14729,0.12168,0.1235,0.12529,0.12591,0.1261,0.12739,0.12609,0.12176,0.12574,0.12229,0.12972,0.12563,0.53956,0.54868,0.53939,0.54495,0.54371,0.53338,0.54375,0.34209,0.32961,0.34313,0.34535,0.33577,0.32856,0.34538,0.41035,0.31813,0.35027,0.34632,0.3317,0.1481,0.1477,0.14736,0.12757,0.12395,0.12553,0.12536,0.12572,0.12639,0.12516,0.12758,0.12592,0.12557,0.13332,0.12723,0.12639,0.12379,0.12476,0.54549,0.54545,0.54645,0.5449,0.54408,0.54775,0.53531,0.53196,0.54282,0.36649,0.34458,0.34652,0.32726,0.2929,0.34613,0.38142,0.37095,0.26217,0.33274,0.35067,0.12452,0.12399,0.12461,0.12362,0.12413,0.12762,0.12598,0.12503,0.11923,0.12488,0.12614,0.1277,0.12352,0.1248,0.12782,0.12697,0.1248,0.12754,0.55663,0.54414,0.54451,0.55052,0.53621,0.53748,0.55155,0.55447,0.53552,0.32682,0.34377,0.27639,0.29752,0.22484,0.27193,0.26997,0.25437,0.27489,0.27059,0.26755,0.12459

,0.12754,0.12525,0.12872,0.12393,0.12566,0.1216,0.12373,0.12692,0.1233  
,0.12595,0.12623,0.12716,0.12213,0.12551,0.12501,0.12464,0.12522,0.543  
65,0.54017,0.55056,0.53607,0.53954,0.53852,0.55261,0.54356,0.55263,0.3  
3469,0.25874,0.23629,0.2619,0.28219,0.25313,0.26985,0.2516,0.27176,0.2  
4547,0.27317,0.11785,0.12588,0.12504,0.13215,0.12669,0.12411,0.12621,0  
.12509,0.12308,0.12435,0.12291,0.12494,0.12512,0.12573,0.11807,0.1261,  
0.12517,0.12567,0.55147,0.54265,0.5459,0.54876,0.54537,0.5493,0.54281,  
0.32443,0.31118,0.32659,0.30622,0.29764,0.2619,0.27756,0.27997,0.26836  
,0.2683,0.25328,0.24081,0.26698,0.12257,0.12565,0.13086,0.12573,0.1251  
8,0.1302,0.11801,0.12295,0.12716,0.12563,0.12524,0.12441,0.12502,0.131  
41,0.12464,0.12963,0.12486,0.11798,0.54058,0.54494,0.54109,0.53418,0.5  
4412,0.53969,0.31279,0.3276,0.34999,0.38899,0.25674,0.27173,0.23795,0.  
20435,0.27859,0.29838,0.26825,0.23687,0.26456,0.24639,0.12856,0.12465,  
0.12484,0.12576,0.12772,0.1286,0.12373,0.12528,0.12632,0.12391,0.12294  
,0.1228,0.12363,0.12867,0.12584,0.12171,0.11967,0.12595,0.53963,0.5532  
1,0.53721,0.5334,0.54194,0.30787,0.29217,0.336,0.32398,0.31472,0.26855  
,0.2508,0.28905,0.28972,0.23691,0.25428,0.26902,0.29812,0.27854,0.2765  
7,0.1269,0.12765,0.12098,0.11878,0.12481,0.12231,0.12595,0.12581,0.125  
28,0.12424,0.12648,0.12572,0.12727,0.12364,0.1263,0.12254,0.12486,0.12  
462,0.54066,0.53993,0.54802,0.27544,0.34286,0.36604,0.29836,0.35055,0.  
31737,0.32767,0.34895,0.27662,0.26396,0.27325,0.20346,0.2662,0.2554,0.  
26815,0.29968,0.26188,0.12586,0.12466,0.12248,0.128,0.12586,0.12368,0.  
12632,0.12553,0.12439,0.12579,0.12496,0.12954,0.12546,0.12528,0.12624,  
0.12504,0.12481,0.12832,0.55324,0.26663,0.29843,0.27519,0.30416,0.3253  
1,0.32938,0.29885,0.32075,0.32306,0.26512,0.22105,0.269,0.25776,0.2523  
2,0.24662,0.2306,0.27407,0.26377,0.12585,0.12864,0.12746,0.12538,0.125  
66,0.12623,0.12246,0.12312,0.13109,0.12454,0.12073,0.1258,0.12659,0.13  
281,0.12521,0.1278,0.12779,0.10363,0.31389,0.32242,0.28368,0.32592,0.3  
2943,0.30171,0.33689,0.27547,0.32277,0.32497,0.24779,0.24974,0.27913,0  
.29504,0.2626,0.21074,0.29308,0.29267,0.26837,0.12339,0.1216,0.12344,0  
.12526,0.12565,0.12532,0.12842,0.12522,0.12634,0.12373,0.12186,0.12569  
,0.12473,0.12117,0.12477,0.12704,0.12342,0.10332,0.32725,0.32532,0.290  
56,0.35125,0.27043,0.31707,0.32597,0.39797,0.33324,0.31451,0.26361,0.2  
6307,0.24774,0.2315,0.26462,0.27039,0.24687,0.26008,0.12469,0.12483,0.  
12612,0.12403,0.12959,0.12458,0.12619,0.12612,0.12493,0.12433,0.12589,  
0.12583,0.12445,0.12454,0.12578,0.11991,0.12267,0.12547,0.10335,0.3154  
1,0.28013,0.33779,0.31348,0.32283,0.34121,0.26726,0.35147,0.31672,0.32  
428,0.27514,0.26518,0.28804,0.28311,0.29197,0.2898,0.27365,0.26328,0.1  
2438,0.12365,0.13652,0.1252,0.12904,0.12497,0.11797,0.12757,0.12868,0.  
12913,0.12485,0.12897,0.12293,0.12596,0.12971,0.12481,0.12541,0.10343,  
0.10378,0.10253,0.33275,0.31438,0.26742,0.3225,0.31915,0.3259,0.3168,0  
.3539,0.32043,0.2617,0.26239,0.23415,0.26287,0.26315,0.28234,0.12553,0  
.12565,0.1279,0.12329,0.12783,0.12428,0.12669,0.12523,0.12989,0.12649,  
0.12023,0.12593,0.1254,0.12488,0.1262,0.12932,0.12623,0.12556,0.10218,  
0.10311,0.10251,0.104,0.32633,0.30292,0.32878,0.29632,0.31402,0.35556,  
0.34981,0.32281,0.22488,0.26473,0.25809,0.25344,0.12186,0.1284,0.12531  
,0.13045,0.12545,0.12417,0.12491,0.12586,0.12654,0.1212,0.12,0.12582,0  
.12415,0.12622,0.12515,0.12505,0.1186,0.12488,0.12629,0.12632,0.10274,  
0.10324,0.10237,0.10351,0.10372,0.10358,0.39899,0.30406,0.32321,0.3221  
3,0.31978,0.37221,0.28644,0.3909,0.11962,0.1271,0.12491,0.12572,0.1250  
6,0.12478,0.12181,0.12454,0.12494,0.12887,0.12252,0.12517,0.1256,0.126  
14,0.12277,0.12436,0.12308,0.12606,0.12177,0.12722,0.13609,0.12698,0.1

2422,0.10217,0.10446,0.10312,0.10307,0.10292,0.10434,0.31857,0.32714,0.35575,0.33482,0.32402,0.10384,0.10328,0.12571,0.12899,0.12691,0.12782,0.12981,0.12476,0.12705,0.12087,0.12638,0.12394,0.12473,0.12537,0.12255,0.12435,0.1224,0.12368,0.12772,0.12456,0.12552,0.12558,0.12614,0.10314,0.10428,0.10275,0.10267,0.10268,0.10455,0.10348,0.10359,0.10278,0.10454,0.32813,0.34297,0.1035,0.10199,0.10159,0.10445,0.12626,0.12518,0.1264,0.1263,0.12453,0.12581,0.12449,0.12196,0.12514,0.1255,0.12232,0.12483,0.12454,0.13005,0.12575,0.12444,0.12107,0.126,0.12532,0.10374,0.10301,0.10253,0.1032,0.10367,0.10333,0.10336,0.10209,0.10359,0.10323,0.10305,0.10281,0.10349,0.10281,0.10395,0.10312,0.10264,0.12639,0.12666,0.12589,0.13069,0.12759,0.12508,0.12528,0.1252,0.12274,0.12322,0.12705,0.12601,0.12545,0.12841,0.1252,0.11488,0.10349,0.103,0.10345,0.10295,0.10369,0.10342,0.10223,0.10302,0.10353,0.10297,0.10399,0.1027,0.10343,0.10276,0.10171,0.10234,0.10344,0.10264,0.10337,0.12228,0.12459,0.12433,0.12712,0.12521,0.12631,0.12919,0.11976,0.12345,0.1232,0.12767,0.12487,0.1235,0.10307,0.10245,0.1033,0.10372,0.10322,0.10342,0.10316,0.10307,0.10367,0.10329,0.10409,0.10373,0.10281,0.10316,0.10307,0.1022,0.10343,0.10321,0.10343,0.10382,0.10347,0.1287,0.12704,0.12364,0.12344,0.12628,0.118,0.12439,0.12142,0.12565,0.10306,0.10343,0.10223,0.10252,0.10388,0.10312,0.10329,0.10256,0.10297,0.10301,0.10389,0.10262,0.10296,0.10326,0.10336,0.10271,0.1021,0.10321,0.10297,0.10286,0.10257,0.10235,0.10299,0.10204,0.10445,0.11944,0.12869,0.12701,0.12392,0.10348,0.10278,0.10316,0.10288,0.1034,0.10295,0.10365,0.10317,0.10273,0.10321,0.103,0.10322,0.10344,0.10312,0.10205,0.10394,0.10307,0.10354,0.10336,0.1037,0.10294,0.10289,0.10256,0.10302,0.10367,0.10313,0.10384,0.10249,0.1034,0.10346,0.10369,0.10279,0.10237,0.10305,0.10342,0.10393,0.10315,0.10271,0.10349,0.10312,0.10241,0.10377,0.10308,0.10328,0.10325,0.10223,0.10275,0.10473,0.10248,0.10376,0.10335,0.10213,0.10304,0.10354,0.10258,0.10304,0.10233,0.10352,0.10282,0.1025,0.10354,0.1044,0.10327,0.1028,0.10199,0.10276,0.10271,0.10373,0.10353,0.1032,0.10381,0.10364,0.10288,0.10303,0.10347,0.10249,0.1033,0.10265,0.10386,0.10288,0.10397,0.10332,0.10193,0.10258,0.1036,0.10401,0.10321,0.10276,0.10369,0.10304,0.10304,0.10343,0.1027,0.10353,0.10267,0.10298,0.10386,0.10268,0.10311,0.10353,0.10322,0.10334,0.10344,0.10334,0.10299,0.10339,0.10475,0.10342,0.10302,0.10212,0.10363,0.10317,0.10371,0.10408,0.10311,0.10334,0.10278,0.10194,0.10334,0.10343,0.10418,0.10325,0.10362,0.10287,0.10442,0.10374,0.10162,0.10361,0.10248,0.10353,0.10246,0.10423,0.10178,0.10362,0.10292,0.10393,0.1036,0.10291,0.10227,0.10234,0.10404,0.10266,0.10332,0.10372,0.1037,0.10332,0.10333,0.10259,0.1023,0.10208,0.10353,0.10315,0.10316,0.10314,0.10344,0.10273,0.10246,0.10422,0.10306,0.10363,0.10253,0.10358,0.10416,0.10321,0.1028,0.10263,0.10281,0.10287,0.10362,0.10284,0.10327,0.10447,0.10284,0.10386,0.10342,0.10255,0.10182,0.10344,0.10331,0.10359,0.10237,0.10286,0.10188,0.10336,0.10214,0.10278,0.10406,0.10314,0.10425,0.10365,0.10385,0.10302,0.10245,0.10309,0.10432  
0.13301,0.13249,0.13312,0.13227,0.13393,0.13255,0.13358,0.13346,0.13253,0.13316,0.13253,0.13274,0.13358,0.13279,0.13345,0.1333,0.13429,0.13321,0.13311,0.13279,0.28233,0.30628,0.32461,0.25822,0.13272,0.13337,0.13312,0.13337,0.13224,0.13342,0.13274,0.13344,0.13373,0.13242,0.13309,0.13262,0.13356,0.1333,0.13363,0.47135,0.30022,0.30899,0.30069,0.3045,0.31428,0.3261,0.13276,0.13273,0.13385,0.13299,0.13374,0.13269,0.1327,0.13358,0.13268,0.13169,0.13272,0.13298,0.133,0.13331,0.13298,0.47617,0.47155,0.28272,0.35144,0.30385,0.30505,0.32506,0.32048,0.31699,0.29808



,0.13245,0.13229,0.13303,0.13302,0.13294,0.13244,0.13343,0.13237,0.13272,0.13287,0.13232,0.13336,0.13355,0.133,0.13324,0.46666,0.47743,0.46816,0.29101,0.27522,0.30599,0.30198,0.30382,0.30275,0.30197,0.27039,0.3339,0.1322,0.13317,0.13329,0.13336,0.13343,0.13404,0.13329,0.13344,0.13257,0.13362,0.13298,0.13295,0.13314,0.13275,0.13343,0.13286,0.47342,0.46244,0.46873,0.47699,0.28121,0.31733,0.345,0.30278,0.30352,0.30585,0.29462,0.31147,0.26275,0.30967,0.13307,0.13345,0.13365,0.13358,0.13297,0.13331,0.1329,0.13316,0.13361,0.13295,0.13408,0.13293,0.13402,0.13212,0.13224,0.1338,0.48143,0.47534,0.47299,0.47422,0.47436,0.4709,0.28341,0.30428,0.31773,0.29212,0.31756,0.31255,0.2998,0.30316,0.33428,0.30364,0.13327,0.13333,0.13306,0.13311,0.13325,0.13277,0.13326,0.13335,0.13311,0.13328,0.13226,0.133,0.1336,0.13237,0.13297,0.13216,0.13255,0.48685,0.47862,0.46513,0.47765,0.48197,0.47603,0.28712,0.3325,0.32642,0.29968,0.30301,0.29913,0.31581,0.35634,0.3049,0.30939,0.3016,0.13354,0.13312,0.13321,0.1324,0.1331,0.13354,0.13319,0.13269,0.13312,0.13338,0.13368,0.13329,0.13315,0.11143,0.11059,0.11023,0.13304,0.47452,0.47788,0.47547,0.47936,0.47694,0.47053,0.47518,0.30059,0.31723,0.3047,0.32529,0.29299,0.29745,0.30683,0.23859,0.29759,0.30245,0.29763,0.13232,0.13284,0.13295,0.13313,0.13299,0.13361,0.13298,0.13259,0.13285,0.13299,0.13279,0.10585,0.10885,0.11229,0.10585,0.10939,0.10722,0.1328,0.47207,0.4659,0.48334,0.47924,0.47355,0.46756,0.49238,0.29496,0.33284,0.28509,0.32279,0.30615,0.30691,0.30489,0.30353,0.29524,0.30277,0.2803,0.133,0.13218,0.13186,0.13256,0.13333,0.13238,0.13299,0.13289,0.13318,0.11131,0.10993,0.11464,0.1156,0.11323,0.10991,0.10787,0.10893,0.1115,0.13299,0.46908,0.4766,0.46589,0.46856,0.47542,0.47494,0.47553,0.29702,0.31094,0.29382,0.30433,0.30885,0.31616,0.30628,0.31144,0.31225,0.30042,0.30172,0.29759,0.13184,0.13323,0.1333,0.13428,0.13341,0.13292,0.1058,0.10789,0.10987,0.11064,0.11039,0.11255,0.11067,0.10642,0.1107,0.10694,0.11434,0.11064,0.47287,0.48342,0.46991,0.48104,0.47981,0.47088,0.47452,0.30053,0.29186,0.30287,0.30198,0.29648,0.29031,0.30426,0.36145,0.28067,0.3094,0.30648,0.2939,0.13373,0.13319,0.13297,0.11287,0.10894,0.10997,0.10963,0.11017,0.11066,0.10985,0.11239,0.11047,0.11002,0.11837,0.11212,0.11109,0.10839,0.10943,0.47849,0.48017,0.48145,0.47612,0.47846,0.47986,0.47175,0.46699,0.47624,0.32344,0.30486,0.30716,0.28897,0.25917,0.30445,0.3366,0.32739,0.23245,0.2948,0.30934,0.10909,0.10885,0.10922,0.10836,0.10918,0.11251,0.11081,0.10965,0.10412,0.10949,0.11075,0.11238,0.10823,0.1096,0.11221,0.11184,0.10917,0.11204,0.48763,0.47444,0.47805,0.47834,0.46654,0.47019,0.48515,0.48972,0.47187,0.28931,0.30399,0.24281,0.25966,0.19776,0.23807,0.23698,0.2234,0.24276,0.23738,0.23563,0.10955,0.11278,0.11,0.11361,0.10912,0.11049,0.10601,0.10831,0.11117,0.10755,0.11038,0.1107,0.11208,0.10645,0.10999,0.1096,0.10939,0.10994,0.47307,0.47759,0.47782,0.46844,0.47393,0.47293,0.48545,0.47614,0.48724,0.29173,0.2271,0.20728,0.22933,0.24758,0.22193,0.23777,0.22201,0.23814,0.21441,0.23967,0.10234,0.11039,0.10985,0.11711,0.11152,0.10872,0.11144,0.10968,0.10762,0.10897,0.10694,0.10995,0.10996,0.11023,0.10264,0.11085,0.10992,0.11027,0.4849,0.47522,0.47856,0.48226,0.48068,0.47742,0.47379,0.28501,0.26812,0.28526,0.27026,0.25981,0.22945,0.24449,0.24463,0.23617,0.23516,0.2231,0.21116,0.23454,0.10759,0.11043,0.11552,0.11077,0.10973,0.11493,0.1023,0.10775,0.11155,0.11029,0.10951,0.1092,0.10958,0.11625,0.10968,0.11438,0.10944,0.10218,0.47554,0.47931,0.47209,0.46788,0.47875,0.47347,0.27231,0.28591,0.30641,0.33882,0.22282,0.23936,0.20695,0.17881,0.24425,0.25993,0.23441,0.20685,0.23198,0.21494,0.11345,0.10

938,0.10935,0.11047,0.11224,0.11338,0.10807,0.10982,0.11106,0.10851,0.10726,0.1072,0.10819,0.11333,0.11033,0.10659,0.10402,0.11092,0.47415,0.48247,0.47524,0.46824,0.47222,0.26905,0.25454,0.29264,0.28066,0.27449,0.23167,0.21877,0.25478,0.25558,0.20606,0.22302,0.23614,0.26251,0.24301,0.24321,0.11186,0.1123,0.10503,0.10346,0.10965,0.1068,0.11035,0.11075,0.11015,0.10903,0.11099,0.11033,0.11212,0.10792,0.11101,0.1071,0.10976,0.10965,0.47509,0.47677,0.47763,0.23892,0.2976,0.31889,0.2588,0.30302,0.27851,0.28469,0.30642,0.24277,0.22988,0.2413,0.17886,0.2339,0.22326,0.23603,0.26447,0.22796,0.11073,0.10922,0.10722,0.11282,0.11048,0.10844,0.11083,0.11009,0.10899,0.11018,0.10962,0.11432,0.1102,0.10986,0.1107,0.11019,0.10942,0.11332,0.49118,0.23197,0.26177,0.23888,0.26565,0.28687,0.28601,0.25913,0.28056,0.28171,0.23204,0.19332,0.23603,0.22613,0.22101,0.21714,0.2031,0.24166,0.23251,0.11062,0.11348,0.11184,0.11017,0.11082,0.11081,0.10717,0.10774,0.11603,0.10887,0.10568,0.11057,0.11142,0.11738,0.11011,0.11231,0.11259,0.087361,0.27333,0.28202,0.24532,0.28562,0.28845,0.26226,0.29571,0.24002,0.28176,0.28256,0.21638,0.21846,0.24568,0.25767,0.23117,0.1848,0.25713,0.25765,0.23649,0.10776,0.10587,0.10793,0.10997,0.11031,0.11017,0.11307,0.10977,0.11114,0.10865,0.10666,0.11016,0.10961,0.1057,0.1094,0.11204,0.10818,0.086901,0.28489,0.28375,0.2529,0.30789,0.23409,0.2755,0.2843,0.35011,0.29101,0.27502,0.23225,0.23145,0.21667,0.20268,0.23236,0.23736,0.21759,0.22838,0.10938,0.10957,0.11102,0.10861,0.11442,0.10921,0.1107,0.11085,0.10941,0.10919,0.11055,0.11021,0.10882,0.1095,0.11012,0.10432,0.10696,0.1105,0.086973,0.27605,0.24407,0.29236,0.27432,0.28221,0.29729,0.23116,0.30701,0.27525,0.28285,0.24087,0.23251,0.25047,0.24823,0.25582,0.25519,0.24163,0.2292,0.10912,0.10829,0.12167,0.10995,0.11395,0.10925,0.10159,0.11272,0.11373,0.11387,0.10923,0.11385,0.10754,0.11072,0.1146,0.10965,0.11069,0.08726,0.087562,0.086823,0.29017,0.27216,0.23144,0.27978,0.27814,0.28464,0.27673,0.30735,0.27745,0.22998,0.23099,0.20675,0.2303,0.22881,0.24867,0.11015,0.11039,0.1124,0.10774,0.1123,0.10868,0.1113,0.10997,0.11489,0.11114,0.10448,0.11062,0.10954,0.10942,0.11053,0.11397,0.11049,0.11033,0.086265,0.086814,0.086485,0.087695,0.28286,0.26352,0.28634,0.25925,0.27412,0.31124,0.30285,0.2823,0.19465,0.23237,0.22543,0.22336,0.10646,0.1131,0.11022,0.11506,0.11009,0.10895,0.10966,0.11042,0.11116,0.10542,0.10431,0.11036,0.10901,0.11105,0.11015,0.10992,0.10338,0.1097,0.11087,0.11092,0.086259,0.087041,0.086619,0.087101,0.087567,0.087162,0.34893,0.263,0.28019,0.2823,0.27791,0.32531,0.24848,0.34082,0.1038,0.11175,0.10918,0.11009,0.10986,0.10947,0.10671,0.10907,0.10988,0.11342,0.10658,0.10975,0.11017,0.11094,0.10715,0.10918,0.10769,0.11031,0.10627,0.11202,0.12111,0.11146,0.10907,0.085566,0.087922,0.086582,0.086797,0.086616,0.088043,0.27776,0.28578,0.3103,0.29285,0.28059,0.087418,0.087172,0.1097,0.11354,0.11132,0.11264,0.11409,0.10953,0.11208,0.10528,0.11121,0.10799,0.10956,0.10981,0.10756,0.10883,0.10705,0.10849,0.113,0.10896,0.11055,0.1103,0.11105,0.08706,0.08763,0.086143,0.086501,0.086459,0.08836,0.087357,0.087147,0.086255,0.087984,0.28637,0.30087,0.087845,0.085805,0.085217,0.08827,0.11076,0.11011,0.11074,0.11075,0.10907,0.11051,0.10914,0.10655,0.10952,0.11044,0.10677,0.10925,0.1092,0.11524,0.11063,0.10964,0.10564,0.11032,0.10996,0.087551,0.087009,0.086304,0.086921,0.087206,0.086989,0.086898,0.085377,0.086986,0.086903,0.086442,0.086801,0.087107,0.086461,0.087378,0.086444,0.086341,0.11087,0.11121,0.11036,0.11523,0.11201,0.10963,0.11013,0.10983,0.1071,0.10794,0.11177,0.11087,0.11016,0.11352,0.10989,0.098953,0.087429,0.086981,0.087231,0.0869

66,0.087547,0.087187,0.086017,0.086243,0.087187,0.086507,0.088121,0.08  
6194,0.086778,0.086158,0.085518,0.086298,0.08703,0.086316,0.087253,0.1  
0671,0.10924,0.10882,0.11184,0.10992,0.11069,0.11385,0.10434,0.10851,0  
.10753,0.11243,0.10982,0.10787,0.086436,0.086128,0.087109,0.08709,0.08  
6494,0.086998,0.086932,0.08674,0.087532,0.087537,0.087494,0.087207,0.0  
86282,0.086452,0.086423,0.08575,0.086877,0.086804,0.087209,0.087676,0.  
08745,0.11326,0.11189,0.10805,0.1076,0.11087,0.10222,0.1085,0.10593,0.  
1103,0.087658,0.087422,0.085918,0.08624,0.087734,0.086646,0.08745,0.08  
6527,0.086985,0.087049,0.087466,0.086765,0.086538,0.086542,0.08719,0.0  
86163,0.085765,0.086773,0.087104,0.086637,0.086066,0.086328,0.08659,0.  
08624,0.087752,0.10398,0.11354,0.11135,0.10878,0.08725,0.086541,0.0873  
59,0.086522,0.086745,0.086767,0.087472,0.086944,0.086415,0.087077,0.08  
6674,0.087183,0.087355,0.086283,0.086446,0.087367,0.08653,0.087146,0.0  
86716,0.087383,0.086303,0.086664,0.086679,0.086348,0.086864,0.086844,0  
.087594,0.085925,0.086738,0.0865,0.08758,0.085978,0.086268,0.086767,0.  
086925,0.087682,0.086776,0.086184,0.087403,0.087084,0.085601,0.087263,  
0.087271,0.087226,0.08721,0.08624,0.086122,0.088846,0.086366,0.087531,  
0.08706,0.086274,0.086403,0.086987,0.086543,0.086262,0.085934,0.087428  
,0.086403,0.086009,0.087196,0.087562,0.087215,0.086438,0.085628,0.0865  
85,0.086203,0.087505,0.087326,0.086907,0.086903,0.087354,0.086812,0.08  
705,0.08737,0.086455,0.0873,0.0862,0.087517,0.087119,0.087825,0.086878  
,0.086033,0.086122,0.087384,0.087562,0.086867,0.086855,0.087491,0.0867  
82,0.086447,0.087177,0.086141,0.087068,0.086756,0.087159,0.087364,0.08  
6302,0.08697,0.087375,0.08687,0.086868,0.087271,0.086393,0.087015,0.08  
6466,0.087683,0.087148,0.086508,0.085776,0.087221,0.086487,0.087386,0.  
08761,0.087525,0.08685,0.086737,0.086207,0.087061,0.087424,0.087823,0.  
086621,0.087173,0.086776,0.087902,0.086968,0.08526,0.086841,0.085974,0  
.086886,0.086142,0.08756,0.085801,0.087515,0.08691,0.087486,0.087583,0  
.08621,0.08554,0.08652,0.087367,0.086093,0.087085,0.087753,0.087613,0.  
086521,0.086995,0.085947,0.086088,0.086051,0.087215,0.086876,0.086685,  
0.08679,0.086882,0.085786,0.086545,0.087528,0.086313,0.087966,0.086536  
,0.087171,0.087495,0.086849,0.08658,0.086506,0.086431,0.086614,0.08716  
6,0.086651,0.086846,0.087746,0.086666,0.087479,0.086987,0.086317,0.085  
299,0.087201,0.087126,0.087231,0.085997,0.086936,0.085497,0.08722,0.08  
5965,0.086253,0.087616,0.086845,0.088386,0.087052,0.087585,0.086822,0.  
08591,0.086716,0.087509  
0.12024,0.11967,0.12026,0.11975,0.12142,0.12006,0.12038,0.12096,0.1193  
1,0.12035,0.11991,0.12008,0.1205,0.1199,0.12059,0.12053,0.12113,0.1204  
,0.12044,0.11996,0.25478,0.27836,0.29257,0.23463,0.12018,0.12083,0.120  
48,0.12066,0.11924,0.12026,0.12029,0.12071,0.12081,0.1198,0.12028,0.12  
009,0.12097,0.12108,0.12072,0.43028,0.27349,0.28155,0.27229,0.27726,0.  
28675,0.29668,0.11991,0.11984,0.12136,0.12031,0.12134,0.12024,0.12012,  
0.1205,0.11961,0.11893,0.12022,0.12028,0.12022,0.12067,0.12003,0.43467  
,0.42771,0.25904,0.32143,0.279,0.27743,0.29185,0.29429,0.28555,0.27214  
,0.11962,0.11978,0.12033,0.11993,0.12006,0.11998,0.12053,0.12,0.1202,0  
.11987,0.11978,0.12051,0.1208,0.12032,0.1207,0.43599,0.4351,0.42799,0.  
26438,0.24979,0.27893,0.27825,0.27561,0.27763,0.27413,0.24496,0.30499,  
0.11974,0.12053,0.12059,0.12046,0.12079,0.1209,0.12028,0.12054,0.12008  
,0.12134,0.12033,0.12003,0.12034,0.12024,0.12051,0.12026,0.43566,0.424  
97,0.43054,0.43847,0.2592,0.29135,0.31425,0.27437,0.27563,0.27729,0.26  
738,0.28433,0.23967,0.28065,0.12021,0.12046,0.12099,0.12064,0.12038,0.  
12064,0.11997,0.12065,0.12072,0.12022,0.12121,0.1203,0.1211,0.11966,0.

11971,0.12112,0.44121,0.435,0.43192,0.43579,0.4301,0.43138,0.25802,0.2  
7628,0.29084,0.26426,0.28713,0.28523,0.27505,0.27353,0.30417,0.27683,0  
.12073,0.12052,0.12067,0.11991,0.12026,0.1198,0.12044,0.12049,0.12034,  
0.12069,0.11975,0.12022,0.12083,0.11999,0.12057,0.11992,0.12002,0.4447  
8,0.44041,0.42478,0.43759,0.44374,0.43743,0.26475,0.30399,0.29688,0.27  
387,0.27518,0.27331,0.28908,0.32354,0.27988,0.28346,0.27543,0.12054,0.  
12037,0.1207,0.11968,0.12016,0.12052,0.12054,0.11979,0.12063,0.12055,0  
.12055,0.1205,0.12062,0.099244,0.0986,0.098334,0.12068,0.42951,0.43371  
,0.43558,0.43667,0.43443,0.43268,0.43241,0.27508,0.29052,0.2767,0.2953  
5,0.26832,0.27109,0.28085,0.21779,0.27158,0.27591,0.27047,0.11958,0.12  
027,0.1204,0.1204,0.11989,0.12066,0.12054,0.11989,0.12021,0.1204,0.119  
84,0.094012,0.096978,0.1001,0.094139,0.097808,0.095626,0.12033,0.43268  
,0.423,0.44324,0.43637,0.42753,0.42615,0.45286,0.26796,0.30132,0.261,0  
.29438,0.27895,0.28027,0.27927,0.27533,0.27004,0.27563,0.25336,0.12024  
,0.11954,0.11942,0.11971,0.12063,0.11941,0.12032,0.12048,0.12018,0.099  
286,0.098653,0.10261,0.10352,0.10155,0.097939,0.096019,0.096991,0.0993  
6,0.12024,0.42944,0.43661,0.42764,0.43028,0.4377,0.43035,0.43852,0.271  
09,0.28443,0.2682,0.27623,0.28135,0.28952,0.27809,0.28297,0.2825,0.274  
13,0.27518,0.26832,0.11956,0.12046,0.12126,0.12129,0.12067,0.12069,0.0  
93873,0.09613,0.097632,0.098749,0.098707,0.10058,0.099074,0.094711,0.0  
9859,0.095379,0.10229,0.098522,0.42935,0.4448,0.43164,0.43411,0.44247,  
0.42758,0.43447,0.27342,0.26715,0.27923,0.27586,0.27044,0.26619,0.2773  
7,0.32802,0.25701,0.28309,0.27976,0.26847,0.12093,0.1209,0.11994,0.100  
8,0.097255,0.098163,0.097571,0.098526,0.098812,0.097857,0.10052,0.0985  
86,0.098028,0.10625,0.10013,0.09921,0.096305,0.098068,0.4365,0.44132,0  
.43559,0.43594,0.43593,0.44036,0.43209,0.42635,0.432,0.29387,0.27696,0  
.2802,0.26532,0.23505,0.27827,0.30709,0.29897,0.21115,0.26744,0.28069,  
0.097198,0.097384,0.097167,0.096906,0.097563,0.10043,0.098927,0.097621  
,0.092411,0.097867,0.09962,0.10062,0.096618,0.097675,0.10039,0.099951,  
0.097375,0.099966,0.44814,0.43497,0.44194,0.43463,0.4285,0.42896,0.442  
51,0.4473,0.4321,0.26463,0.27594,0.21955,0.23754,0.17807,0.21735,0.215  
12,0.20125,0.22021,0.21505,0.21239,0.098126,0.10054,0.097797,0.1015,0.  
097239,0.09855,0.093976,0.096698,0.099332,0.095906,0.098653,0.099051,0  
.09973,0.095072,0.098273,0.097604,0.097596,0.097949,0.43009,0.43408,0.  
43589,0.42517,0.43337,0.43124,0.44578,0.43413,0.44775,0.26365,0.20562,  
0.18736,0.20604,0.22464,0.19939,0.21622,0.20123,0.21473,0.19453,0.2179  
9,0.090723,0.098846,0.098155,0.10499,0.099829,0.096916,0.099837,0.0981  
05,0.095687,0.097059,0.095565,0.097887,0.098171,0.098522,0.090932,0.09  
8647,0.097785,0.098343,0.44165,0.43363,0.43559,0.44319,0.44186,0.43607  
,0.43062,0.25682,0.24207,0.26199,0.24659,0.23639,0.20752,0.22159,0.220  
27,0.2127,0.2127,0.20098,0.19089,0.21241,0.095886,0.098662,0.10366,0.0  
98813,0.097497,0.10248,0.090706,0.096243,0.09953,0.098641,0.097774,0.0  
97325,0.097811,0.10426,0.097924,0.1021,0.097963,0.090997,0.43568,0.435  
53,0.42931,0.425,0.43833,0.43274,0.24561,0.26289,0.27999,0.30882,0.201  
36,0.21852,0.18793,0.16064,0.22221,0.23499,0.21298,0.18526,0.21059,0.1  
9541,0.10111,0.097659,0.097594,0.098258,0.1002,0.10127,0.096529,0.0982  
16,0.09913,0.096862,0.09571,0.095453,0.096319,0.10126,0.098455,0.09431  
9,0.092119,0.098961,0.43637,0.43986,0.43512,0.42418,0.43564,0.2425,0.2  
305,0.26462,0.25297,0.24923,0.21099,0.19832,0.23093,0.23311,0.1883,0.2  
0309,0.21536,0.23928,0.22072,0.22057,0.09989,0.10058,0.093458,0.091659  
,0.097901,0.095037,0.098021,0.099115,0.097801,0.097073,0.099068,0.0986  
46,0.10024,0.095342,0.099363,0.095414,0.097742,0.097914,0.43403,0.4305

8, 0.43584, 0.21611, 0.27271, 0.28831, 0.23549, 0.27575, 0.25296, 0.25809, 0.27  
68, 0.22192, 0.20843, 0.22, 0.16121, 0.21137, 0.20023, 0.2138, 0.23855, 0.20474  
, 0.099122, 0.097223, 0.095698, 0.10058, 0.098214, 0.096619, 0.09873, 0.098184  
, 0.096983, 0.0983, 0.097641, 0.10228, 0.098491, 0.097914, 0.098769, 0.098394,  
0.097472, 0.10132, 0.44901, 0.21146, 0.23563, 0.21751, 0.24164, 0.25954, 0.259  
54, 0.23463, 0.25228, 0.25489, 0.21073, 0.17523, 0.21288, 0.20497, 0.20133, 0.1  
9679, 0.18485, 0.21852, 0.21285, 0.098488, 0.10152, 0.10005, 0.098254, 0.09871  
, 0.099082, 0.09558, 0.095492, 0.10368, 0.097092, 0.09409, 0.098826, 0.099374,  
0.1054, 0.098203, 0.10038, 0.10028, 0.076343, 0.24831, 0.25734, 0.22151, 0.259  
95, 0.26159, 0.23723, 0.26879, 0.21615, 0.25362, 0.25701, 0.19566, 0.19715, 0.2  
2258, 0.23201, 0.21004, 0.16885, 0.23314, 0.23314, 0.21545, 0.095943, 0.093799  
, 0.095818, 0.098, 0.099034, 0.098276, 0.10093, 0.09794, 0.099257, 0.097255, 0.  
094721, 0.097951, 0.097726, 0.093928, 0.097724, 0.10022, 0.096143, 0.075675, 0.  
.25973, 0.25567, 0.23104, 0.27909, 0.2127, 0.2501, 0.25796, 0.31882, 0.26458, 0.  
.25113, 0.20933, 0.2109, 0.19725, 0.18296, 0.20968, 0.21534, 0.19764, 0.2064, 0.  
.09759, 0.097729, 0.099299, 0.096523, 0.10209, 0.097511, 0.098925, 0.098976, 0.  
.097465, 0.097801, 0.098228, 0.098455, 0.096828, 0.09795, 0.098323, 0.092763,  
0.095257, 0.098509, 0.076346, 0.24944, 0.21973, 0.2667, 0.24805, 0.25445, 0.26  
982, 0.20791, 0.28106, 0.2481, 0.25724, 0.21968, 0.21157, 0.22726, 0.22704, 0.2  
338, 0.23134, 0.21961, 0.20814, 0.09702, 0.096693, 0.10917, 0.097831, 0.10204,  
0.097748, 0.089721, 0.10078, 0.10169, 0.10168, 0.097284, 0.10212, 0.095429, 0.  
098683, 0.10221, 0.097693, 0.098836, 0.076316, 0.07643, 0.07572, 0.26237, 0.24  
573, 0.20694, 0.25307, 0.25371, 0.26062, 0.25101, 0.28218, 0.25215, 0.20992, 0.  
20997, 0.18635, 0.20937, 0.20786, 0.22344, 0.098468, 0.09863, 0.10034, 0.09592  
7, 0.10034, 0.096405, 0.099109, 0.098164, 0.10289, 0.099246, 0.092763, 0.09897  
3, 0.097575, 0.097553, 0.098851, 0.10204, 0.098445, 0.098246, 0.075484, 0.0758  
94, 0.07539, 0.07697, 0.25547, 0.23953, 0.2608, 0.23587, 0.24622, 0.28359, 0.27  
421, 0.25644, 0.17476, 0.21059, 0.20285, 0.20246, 0.095044, 0.10102, 0.098293,  
0.10324, 0.098264, 0.097047, 0.098086, 0.098634, 0.099251, 0.093485, 0.092942  
, 0.098512, 0.097407, 0.099351, 0.098478, 0.097986, 0.091588, 0.097646, 0.0990  
78, 0.099328, 0.075189, 0.076542, 0.075647, 0.076242, 0.076535, 0.076028, 0.31  
653, 0.24109, 0.25817, 0.25632, 0.25118, 0.29428, 0.22453, 0.3059, 0.092116, 0.  
1, 0.097352, 0.098343, 0.097909, 0.097288, 0.095143, 0.097068, 0.098357, 0.101  
55, 0.094963, 0.097401, 0.098395, 0.099219, 0.095605, 0.097162, 0.095727, 0.09  
8124, 0.094565, 0.10021, 0.10887, 0.099071, 0.09725, 0.074398, 0.076547, 0.075  
559, 0.076195, 0.075691, 0.077146, 0.24996, 0.26092, 0.28227, 0.26697, 0.25428  
, 0.075948, 0.076144, 0.097975, 0.10161, 0.099079, 0.10066, 0.10191, 0.09798, 0.  
.10024, 0.093288, 0.099422, 0.096199, 0.098182, 0.098183, 0.09547, 0.096751, 0.  
.09506, 0.096708, 0.10065, 0.097054, 0.098685, 0.0986, 0.099204, 0.075785, 0.0  
76526, 0.074965, 0.075352, 0.075693, 0.077551, 0.076503, 0.076059, 0.075598, 0.  
.076791, 0.25815, 0.27179, 0.076945, 0.075267, 0.074129, 0.077073, 0.098462, 0.  
.098551, 0.099443, 0.099142, 0.097096, 0.098551, 0.097438, 0.094918, 0.097577  
, 0.098273, 0.095286, 0.097508, 0.097639, 0.10293, 0.098594, 0.097965, 0.09353  
4, 0.098417, 0.098137, 0.076613, 0.076048, 0.075366, 0.076283, 0.076192, 0.075  
927, 0.076404, 0.074944, 0.075856, 0.075886, 0.075638, 0.075721, 0.075923, 0.0  
75888, 0.076794, 0.07531, 0.075702, 0.099205, 0.099065, 0.098727, 0.10276, 0.1  
0022, 0.098223, 0.098209, 0.097586, 0.095563, 0.095754, 0.099891, 0.098865, 0.  
098328, 0.10142, 0.097977, 0.087347, 0.076655, 0.075817, 0.076283, 0.07604, 0.  
076683, 0.076225, 0.075201, 0.07559, 0.076128, 0.075463, 0.076782, 0.074846, 0.  
.075576, 0.075036, 0.074318, 0.075546, 0.07624, 0.075235, 0.076414, 0.094801,  
0.097146, 0.097536, 0.099774, 0.097916, 0.098859, 0.1018, 0.092364, 0.096408,  
0.095647, 0.10032, 0.097874, 0.096065, 0.074964, 0.075037, 0.075827, 0.075908

,0.075447,0.076143,0.076056,0.076021,0.076769,0.076275,0.076281,0.075777,0.075278,0.07545,0.075319,0.075049,0.075956,0.075888,0.076273,0.075978,0.076427,0.10151,0.10016,0.096394,0.095873,0.099048,0.090916,0.096396,0.094011,0.098364,0.076327,0.076592,0.074974,0.075697,0.076435,0.07573,0.076669,0.07546,0.076169,0.075943,0.076234,0.075773,0.075117,0.075308,0.076293,0.075234,0.074695,0.075573,0.076096,0.075913,0.07517,0.075118,0.075563,0.07527,0.076808,0.092547,0.10116,0.09929,0.097328,0.076033,0.075568,0.076341,0.07568,0.07539,0.076149,0.076556,0.076117,0.075761,0.076148,0.076307,0.076464,0.076116,0.075732,0.075843,0.076574,0.07623,0.076415,0.075546,0.076181,0.074954,0.075983,0.076232,0.075787,0.075765,0.075684,0.077025,0.074823,0.075558,0.075488,0.076835,0.074998,0.075592,0.075431,0.076034,0.076429,0.075616,0.075685,0.076285,0.07599,0.07505,0.076485,0.075999,0.076366,0.076049,0.075299,0.075873,0.077568,0.075713,0.076277,0.0759,0.075378,0.075406,0.076237,0.075432,0.074966,0.075589,0.07624,0.075064,0.07519,0.076732,0.076719,0.076185,0.07551,0.074946,0.07562,0.075202,0.076611,0.076261,0.075901,0.075703,0.076511,0.076171,0.076059,0.076083,0.075636,0.075998,0.075148,0.076666,0.076019,0.076823,0.075789,0.075316,0.075336,0.076532,0.076321,0.075824,0.075384,0.076122,0.075648,0.075043,0.075951,0.07494,0.075841,0.075493,0.07591,0.076025,0.075259,0.075964,0.075771,0.076033,0.075847,0.076417,0.075415,0.075781,0.075319,0.076399,0.076064,0.075109,0.07486,0.076342,0.075434,0.076344,0.076702,0.076667,0.075502,0.075186,0.075595,0.076297,0.076434,0.077223,0.075564,0.075533,0.076397,0.076684,0.07568,0.074304,0.076336,0.075106,0.075854,0.075548,0.076576,0.075315,0.076959,0.075829,0.07646,0.076412,0.075437,0.07482,0.075143,0.076458,0.075283,0.076128,0.076658,0.076685,0.075671,0.075991,0.07503,0.074835,0.075318,0.075827,0.07618,0.075651,0.075716,0.075836,0.075173,0.075959,0.076355,0.075332,0.076877,0.075454,0.076395,0.076847,0.076028,0.075345,0.075469,0.075394,0.075914,0.076166,0.075506,0.07586,0.076991,0.07573,0.07592,0.076069,0.075472,0.07434,0.076001,0.075885,0.076057,0.075508,0.07615,0.074327,0.076036,0.075106,0.075439,0.076812,0.075695,0.077343,0.075881,0.076982,0.075614,0.07516,0.075679,0.076643  
0.10935,0.10887,0.10953,0.1091,0.11035,0.10939,0.1099,0.11024,0.10883,0.10943,0.10901,0.10921,0.10969,0.10932,0.11001,0.11025,0.11016,0.10961,0.1096,0.10918,0.23841,0.25868,0.2727,0.2187,0.10968,0.10966,0.10954,0.10982,0.10869,0.10939,0.1093,0.11,0.11031,0.10882,0.11002,0.10949,0.11009,0.11019,0.11016,0.40433,0.25421,0.26168,0.25371,0.25741,0.26704,0.27727,0.1094,0.10921,0.11066,0.10978,0.11049,0.10922,0.10939,0.10978,0.10887,0.10833,0.10939,0.1093,0.10944,0.11003,0.10916,0.40831,0.40504,0.23912,0.30038,0.26299,0.25964,0.26935,0.27529,0.26465,0.25343,0.10893,0.10889,0.10971,0.10929,0.10921,0.10887,0.10954,0.10925,0.10962,0.10934,0.10919,0.10958,0.11055,0.10974,0.10972,0.41132,0.4115,0.4014,0.2477,0.23356,0.26147,0.25938,0.25559,0.26056,0.25589,0.22664,0.28481,0.10888,0.10966,0.11035,0.10955,0.10992,0.10997,0.10963,0.10965,0.10952,0.11051,0.10935,0.10932,0.10999,0.10938,0.10938,0.10953,0.41268,0.39868,0.40514,0.40902,0.24229,0.27202,0.29417,0.2568,0.25743,0.25833,0.25187,0.26572,0.2237,0.26134,0.10974,0.10956,0.11017,0.10978,0.10974,0.10964,0.10935,0.10983,0.10976,0.1099,0.11048,0.10976,0.11022,0.10922,0.10882,0.11066,0.41414,0.40968,0.4069,0.40919,0.40622,0.40626,0.24112,0.25743,0.27131,0.24761,0.27064,0.26728,0.25658,0.25478,0.28445,0.25694,0.10999,0.10961,0.10984,0.10922,0.10967,0.10904,0.11001,0.1096,0.10953,0.10968,0.10913,0.10989,0.11021,0.10927,0.11005,0.10935,0.10921,0.4

1987,0.41357,0.40281,0.41356,0.41642,0.41153,0.24753,0.286,0.27568,0.25616,0.25636,0.25617,0.26877,0.30542,0.25984,0.26509,0.25801,0.10952,0.10996,0.1101,0.10926,0.10933,0.10977,0.10975,0.10903,0.10961,0.10982,0.10977,0.10947,0.10965,0.090325,0.08936,0.089674,0.11005,0.40275,0.41036,0.40434,0.41475,0.41057,0.41214,0.40542,0.25683,0.27267,0.25834,0.27689,0.24921,0.25407,0.26199,0.20178,0.25301,0.25782,0.25239,0.10874,0.10925,0.10955,0.10936,0.10902,0.10967,0.10997,0.10901,0.10962,0.10969,0.109,0.085388,0.088086,0.090956,0.085641,0.088702,0.086925,0.10994,0.40681,0.39908,0.41255,0.41,0.39772,0.40303,0.42588,0.24989,0.28391,0.24373,0.27679,0.26034,0.26301,0.26164,0.25979,0.25214,0.25936,0.23612,0.10951,0.10929,0.10857,0.1092,0.10967,0.10819,0.10966,0.10959,0.10971,0.090237,0.089409,0.093131,0.094177,0.091971,0.089047,0.087111,0.088215,0.090267,0.10962,0.40616,0.41362,0.40445,0.40531,0.41306,0.40269,0.412,0.25207,0.26724,0.24839,0.25852,0.26269,0.27137,0.26235,0.26361,0.2627,0.25499,0.25727,0.25094,0.10885,0.10988,0.11005,0.11089,0.10972,0.11026,0.085553,0.087256,0.088732,0.089948,0.089772,0.091326,0.089875,0.086041,0.089644,0.086596,0.092915,0.089346,0.40647,0.41888,0.40395,0.41116,0.41412,0.40221,0.40812,0.25566,0.24947,0.26194,0.25512,0.25236,0.2492,0.25712,0.30738,0.23967,0.26155,0.26334,0.24933,0.1104,0.11013,0.1092,0.09137,0.087875,0.0893,0.088292,0.089327,0.090211,0.088846,0.09155,0.089244,0.089118,0.096712,0.090996,0.09009,0.087247,0.088758,0.41102,0.41237,0.4088,0.40949,0.40764,0.41811,0.40436,0.40034,0.40875,0.27516,0.25914,0.26171,0.24846,0.2191,0.25998,0.28709,0.28219,0.19562,0.24799,0.2618,0.088563,0.088485,0.088481,0.087946,0.088254,0.09147,0.090111,0.088725,0.084109,0.089144,0.09055,0.091155,0.088066,0.088742,0.091517,0.090917,0.088729,0.090775,0.41937,0.41038,0.4185,0.40771,0.40455,0.40298,0.41164,0.42357,0.40966,0.2497,0.25645,0.2042,0.22336,0.16443,0.2022,0.19951,0.1866,0.20378,0.19918,0.1975,0.0892,0.091136,0.088909,0.092006,0.088181,0.08942,0.085579,0.087887,0.089768,0.087019,0.089465,0.089955,0.090644,0.086434,0.089019,0.088695,0.088569,0.088943,0.40859,0.40761,0.41033,0.39652,0.40823,0.40597,0.4219,0.40793,0.42079,0.24568,0.19127,0.1729,0.19198,0.20895,0.18623,0.20266,0.18658,0.19965,0.1815,0.20292,0.082199,0.090138,0.089206,0.095262,0.090351,0.088451,0.090369,0.089407,0.087017,0.088056,0.086697,0.089048,0.089168,0.089473,0.082651,0.08969,0.088912,0.089115,0.4181,0.40861,0.40855,0.41496,0.41642,0.41259,0.40433,0.24098,0.22786,0.24611,0.23094,0.22215,0.19361,0.20545,0.20546,0.19902,0.19655,0.1873,0.17848,0.19743,0.087034,0.08984,0.094388,0.089864,0.088207,0.093212,0.082204,0.087215,0.090682,0.089399,0.088678,0.087798,0.08895,0.095014,0.089074,0.092767,0.088692,0.08237,0.40803,0.41062,0.40311,0.40302,0.41263,0.40593,0.22961,0.24527,0.26139,0.28917,0.18815,0.20256,0.17474,0.14838,0.20773,0.22007,0.19867,0.17197,0.19752,0.18109,0.092246,0.088636,0.088689,0.089238,0.090968,0.091968,0.087173,0.089039,0.090156,0.088021,0.086914,0.086663,0.087499,0.092105,0.089394,0.085304,0.083693,0.089756,0.40981,0.41042,0.4085,0.39711,0.40874,0.22643,0.21507,0.24683,0.23971,0.23285,0.19697,0.1845,0.2135,0.21636,0.17484,0.18941,0.19891,0.22246,0.20638,0.2045,0.0908,0.091575,0.084701,0.083063,0.088674,0.086413,0.089333,0.090449,0.088936,0.088381,0.089738,0.089699,0.090935,0.086623,0.090457,0.086808,0.088915,0.089239,0.40943,0.40496,0.41001,0.20304,0.25572,0.27063,0.21982,0.25593,0.23793,0.24355,0.25793,0.20735,0.19258,0.20515,0.14954,0.19908,0.18708,0.19939,0.22072,0.19158,0.090322,0.088139,0.086947,0.091869,0.088889,0.087661,0.089665,0.089252,0.087892,0.089483,0.088918,0.092466,

0.08946,0.089013,0.089268,0.089142,0.088075,0.091903,0.42309,0.19705,0  
.22122,0.20352,0.22257,0.24316,0.24294,0.21887,0.23662,0.23747,0.19664  
,0.16274,0.20063,0.19281,0.1893,0.18111,0.172,0.20552,0.1977,0.089281,  
0.091975,0.091153,0.089101,0.089592,0.089769,0.086836,0.086781,0.09387  
2,0.088075,0.084814,0.089953,0.090335,0.095787,0.0891,0.09096,0.091176  
,0.068921,0.23296,0.24083,0.2082,0.24319,0.24561,0.2231,0.2518,0.20153  
,0.23688,0.24117,0.18351,0.18412,0.2059,0.21573,0.19698,0.15642,0.2195  
8,0.21539,0.20075,0.087704,0.084785,0.086892,0.089113,0.090111,0.08937  
8,0.091839,0.088853,0.090164,0.088489,0.086193,0.088759,0.088874,0.085  
394,0.088847,0.091005,0.087064,0.06819,0.24381,0.24123,0.21442,0.2589,  
0.19948,0.23466,0.24135,0.29859,0.2466,0.23379,0.19584,0.19668,0.18322  
,0.17027,0.19543,0.20094,0.18389,0.19201,0.088895,0.088734,0.090326,0.  
087628,0.092698,0.088641,0.089743,0.089983,0.088865,0.088997,0.089123,  
0.089599,0.087828,0.088854,0.089184,0.0843,0.086156,0.089652,0.068964,  
0.23372,0.20575,0.25046,0.23014,0.23527,0.25259,0.19438,0.2606,0.23166  
,0.24422,0.20333,0.19648,0.21192,0.21379,0.21673,0.21594,0.2045,0.1933  
2,0.088124,0.087664,0.099339,0.089236,0.092621,0.088674,0.081314,0.092  
008,0.092285,0.092382,0.088245,0.092808,0.08641,0.089424,0.09325,0.088  
669,0.089743,0.069581,0.069254,0.068769,0.24645,0.23281,0.19435,0.2350  
2,0.23733,0.24165,0.23373,0.26563,0.23868,0.19536,0.19569,0.17211,0.19  
388,0.19384,0.20831,0.08934,0.089682,0.091154,0.087049,0.090916,0.0873  
46,0.090134,0.089066,0.093313,0.090054,0.08412,0.089943,0.088408,0.088  
458,0.089717,0.092919,0.089414,0.089407,0.068234,0.068644,0.06828,0.06  
9788,0.23858,0.22423,0.24299,0.22142,0.22832,0.26318,0.25696,0.23993,0  
.16247,0.19666,0.18741,0.18873,0.085946,0.092065,0.089383,0.094013,0.0  
89336,0.088141,0.089267,0.089611,0.090295,0.084622,0.084374,0.089749,0  
.088359,0.089985,0.089704,0.088984,0.082619,0.088432,0.09016,0.089886,  
0.068036,0.069093,0.068361,0.068812,0.069655,0.068942,0.29804,0.22231,  
0.24218,0.2408,0.23572,0.2745,0.20995,0.28994,0.083363,0.090986,0.0880  
8,0.089356,0.088921,0.088408,0.086718,0.088506,0.089139,0.09231,0.0860  
41,0.088264,0.089473,0.090084,0.086888,0.088462,0.086572,0.089092,0.08  
5834,0.091068,0.099075,0.090024,0.089054,0.06761,0.069084,0.068323,0.0  
69121,0.068526,0.06961,0.23388,0.24298,0.26276,0.24803,0.23935,0.06903  
4,0.068633,0.088848,0.092504,0.089799,0.09096,0.092617,0.088748,0.0910  
42,0.08464,0.090345,0.087371,0.089208,0.089338,0.086182,0.087854,0.086  
667,0.087663,0.091587,0.088271,0.089749,0.089394,0.090239,0.068146,0.0  
69305,0.067384,0.068255,0.068758,0.070196,0.069339,0.068817,0.06802,0.  
069213,0.24175,0.25485,0.069273,0.068252,0.066434,0.069844,0.089242,0.  
089651,0.090191,0.089802,0.088184,0.089455,0.088422,0.086585,0.088447,  
0.08952,0.086546,0.088669,0.088599,0.093587,0.089376,0.08909,0.084573,  
0.089428,0.089266,0.069527,0.069304,0.068156,0.068866,0.068656,0.06895  
2,0.069345,0.067843,0.06856,0.068387,0.068009,0.06809,0.068447,0.06861  
5,0.069505,0.067833,0.068914,0.08975,0.090118,0.089614,0.093482,0.0906  
17,0.089297,0.08923,0.088455,0.086412,0.087138,0.090693,0.089778,0.089  
255,0.091806,0.089124,0.079508,0.069189,0.068376,0.068813,0.069053,0.0  
69619,0.068546,0.068,0.067847,0.068473,0.068224,0.069631,0.068335,0.06  
8408,0.068045,0.067258,0.067944,0.068916,0.067387,0.068842,0.086231,0.  
08844,0.088396,0.090534,0.088929,0.08971,0.092461,0.083937,0.087141,0.  
087021,0.091273,0.088675,0.087069,0.068139,0.068074,0.067931,0.06882,0  
.06823,0.068737,0.068788,0.068591,0.069378,0.068822,0.068736,0.068752,  
0.067894,0.068371,0.068017,0.067862,0.068702,0.068659,0.06885,0.068498  
,0.069174,0.091975,0.091293,0.087699,0.086963,0.08977,0.082537,0.08761



6, 0.085291, 0.089422, 0.068912, 0.069189, 0.068025, 0.068574, 0.069291, 0.068018, 0.068885, 0.06833, 0.068916, 0.068774, 0.069193, 0.068808, 0.067916, 0.068069, 0.069403, 0.06786, 0.06721, 0.067953, 0.068556, 0.069028, 0.068102, 0.067821, 0.067731, 0.067816, 0.069875, 0.083351, 0.09195, 0.09008, 0.088575, 0.068697, 0.068192, 0.068993, 0.068086, 0.068004, 0.068745, 0.069415, 0.068723, 0.068664, 0.069174, 0.06892, 0.068884, 0.069198, 0.068144, 0.068593, 0.069481, 0.068675, 0.069769, 0.0678, 0.068222, 0.067623, 0.068528, 0.068942, 0.068635, 0.068231, 0.068038, 0.069421, 0.067583, 0.068531, 0.068364, 0.069894, 0.067765, 0.068246, 0.068279, 0.068879, 0.068734, 0.068079, 0.068013, 0.069236, 0.068668, 0.068021, 0.068938, 0.068765, 0.068893, 0.068585, 0.067864, 0.068977, 0.070504, 0.068694, 0.06932, 0.068694, 0.068368, 0.068225, 0.068925, 0.068505, 0.06783, 0.068636, 0.068852, 0.067663, 0.068186, 0.069314, 0.069023, 0.069074, 0.06831, 0.067281, 0.068701, 0.068068, 0.069164, 0.069166, 0.068602, 0.068282, 0.069301, 0.069016, 0.068541, 0.069135, 0.068054, 0.068901, 0.067689, 0.068986, 0.068625, 0.069425, 0.068473, 0.068325, 0.067685, 0.068557, 0.069058, 0.068446, 0.06838, 0.06863, 0.069095, 0.067744, 0.068305, 0.067736, 0.06867, 0.068031, 0.068968, 0.069022, 0.067799, 0.068689, 0.068471, 0.068973, 0.068478, 0.069298, 0.067673, 0.068936, 0.068019, 0.069342, 0.068869, 0.067712, 0.067803, 0.069668, 0.068361, 0.069321, 0.069412, 0.06942, 0.068222, 0.067999, 0.068187, 0.068858, 0.068954, 0.069594, 0.068569, 0.068241, 0.069268, 0.069069, 0.068004, 0.066984, 0.068716, 0.067491, 0.068244, 0.067986, 0.06925, 0.068069, 0.069913, 0.068505, 0.068882, 0.069019, 0.068207, 0.067986, 0.067528, 0.069681, 0.068293, 0.069109, 0.069253, 0.069404, 0.068866, 0.06871, 0.068256, 0.067334, 0.067954, 0.068165, 0.068629, 0.068145, 0.068404, 0.068463, 0.068189, 0.068571, 0.069251, 0.068123, 0.069431, 0.068007, 0.069046, 0.069266, 0.068683, 0.068202, 0.068695, 0.068163, 0.068555, 0.068884, 0.068023, 0.068543, 0.069422, 0.068648, 0.06851, 0.068229, 0.068498, 0.067084, 0.068594, 0.068879, 0.069104, 0.068371, 0.068943, 0.067287, 0.068732, 0.067609, 0.067924, 0.069879, 0.068844, 0.070162, 0.068802, 0.069582, 0.069109, 0.067865, 0.068788, 0.069167, 0.10028, 0.10041, 0.10073, 0.1004, 0.10182, 0.1007, 0.1013, 0.10125, 0.10025, 0.10083, 0.10053, 0.10068, 0.10108, 0.10024, 0.10113, 0.10124, 0.10163, 0.10074, 0.10094, 0.10044, 0.22682, 0.2447, 0.25871, 0.20547, 0.1009, 0.10102, 0.10083, 0.1012, 0.10019, 0.10094, 0.1004, 0.10122, 0.1017, 0.10006, 0.10137, 0.10055, 0.101, 0.10139, 0.10141, 0.38729, 0.24517, 0.25017, 0.24047, 0.24462, 0.25361, 0.26626, 0.10104, 0.10051, 0.10177, 0.10083, 0.102, 0.10063, 0.10065, 0.10119, 0.1004, 0.099558, 0.10024, 0.10079, 0.10093, 0.10102, 0.1005, 0.38901, 0.38497, 0.22499, 0.28432, 0.24999, 0.24807, 0.25716, 0.26124, 0.25225, 0.24015, 0.10026, 0.1002, 0.1009, 0.10075, 0.10047, 0.1006, 0.10083, 0.10014, 0.10062, 0.10072, 0.10013, 0.10079, 0.10165, 0.10116, 0.10112, 0.39354, 0.39477, 0.38203, 0.23451, 0.22152, 0.25031, 0.24681, 0.24292, 0.24764, 0.24372, 0.21382, 0.2717, 0.10009, 0.1011, 0.10117, 0.10069, 0.10114, 0.10118, 0.10062, 0.1009, 0.1008, 0.10161, 0.10057, 0.10028, 0.10106, 0.1006, 0.10066, 0.10107, 0.40042, 0.38743, 0.38765, 0.39198, 0.22998, 0.25804, 0.2815, 0.24579, 0.24527, 0.24553, 0.23984, 0.25361, 0.21158, 0.24804, 0.10082, 0.10091, 0.10145, 0.1008, 0.10106, 0.10048, 0.10075, 0.10099, 0.10073, 0.10082, 0.10126, 0.10109, 0.10097, 0.10019, 0.10035, 0.10211, 0.39754, 0.39446, 0.39146, 0.39403, 0.39408, 0.39186, 0.22752, 0.24644, 0.2589, 0.23493, 0.25768, 0.2547, 0.24544, 0.24398, 0.27146, 0.24628, 0.10119, 0.10072, 0.10142, 0.10045, 0.1011, 0.10063, 0.10136, 0.10093, 0.10047, 0.10064, 0.10032, 0.10106, 0.10141, 0.10078, 0.10138, 0.10109, 0.10076, 0.40175, 0.39967, 0.38298, 0.39433, 0.3975, 0.39647, 0.23673, 0.27396, 0.26194, 0.24411, 0.24265, 0.24209, 0.2573, 0.28924, 0.2459, 0.25082, 0.24581, 0.10105, 0.10106, 0.10138, 0.10038, 0.10061, 0.10133, 0.10103, 0.1003, 0.10079, 0.10092, 0.10086,

0.10113,0.10108,0.083107,0.082783,0.083062,0.10089,0.38775,0.39486,0.3  
8741,0.39961,0.39133,0.39163,0.39231,0.24326,0.25823,0.24867,0.26532,0  
.23576,0.24117,0.24815,0.19063,0.23941,0.24573,0.23855,0.099723,0.1002  
5,0.101,0.10049,0.10025,0.10047,0.10111,0.10032,0.1006,0.10105,0.10034  
,0.079139,0.081292,0.084015,0.079098,0.081979,0.080532,0.10098,0.39226  
,0.3861,0.39741,0.39089,0.38571,0.38508,0.41191,0.23803,0.2691,0.23276  
,0.26377,0.24703,0.2507,0.24859,0.2458,0.24072,0.24594,0.2242,0.10083,  
0.10053,0.099943,0.10041,0.1007,0.099373,0.10104,0.101,0.10119,0.08321  
6,0.082829,0.085851,0.086795,0.085272,0.082206,0.080912,0.081402,0.082  
843,0.10107,0.39273,0.39141,0.38907,0.38885,0.39483,0.3877,0.39806,0.2  
3851,0.25425,0.2345,0.24776,0.24918,0.25731,0.25001,0.24938,0.25095,0.  
24348,0.24429,0.23709,0.10029,0.10076,0.10108,0.10223,0.10077,0.10135,  
0.0792,0.080714,0.081874,0.083183,0.082911,0.084233,0.083183,0.079519,  
0.082533,0.080161,0.085524,0.082673,0.39046,0.40417,0.38654,0.39405,0.  
39317,0.38741,0.39375,0.24548,0.23828,0.25126,0.24428,0.23866,0.23828,  
0.24485,0.29399,0.22609,0.2467,0.24985,0.23588,0.10147,0.10165,0.10024  
,0.084483,0.081068,0.082265,0.08151,0.082807,0.083305,0.081997,0.08426  
9,0.082048,0.082178,0.089312,0.084171,0.083878,0.080817,0.081875,0.395  
25,0.39498,0.38972,0.39127,0.39287,0.3988,0.38629,0.38703,0.39408,0.26  
136,0.24418,0.24706,0.23665,0.2058,0.24836,0.27098,0.26697,0.18493,0.2  
344,0.2503,0.08158,0.081613,0.081619,0.081384,0.081515,0.084441,0.0835  
04,0.081893,0.077681,0.082116,0.083651,0.084098,0.080855,0.082129,0.08  
4733,0.083675,0.082216,0.083483,0.4012,0.3934,0.40085,0.3873,0.38906,0  
.39117,0.39761,0.40603,0.39058,0.23749,0.24633,0.19117,0.21042,0.1561,  
0.19224,0.18824,0.17657,0.19546,0.18863,0.18786,0.082154,0.084542,0.08  
2311,0.084981,0.081612,0.08291,0.078831,0.081634,0.082982,0.080279,0.0  
82473,0.083056,0.083358,0.079893,0.08258,0.082071,0.082055,0.082509,0.  
39475,0.38955,0.3953,0.37917,0.38824,0.38657,0.40409,0.38909,0.40203,0  
.2347,0.18185,0.1646,0.18241,0.19766,0.17588,0.19131,0.17625,0.18943,0  
.17444,0.19116,0.076091,0.083482,0.082844,0.087951,0.083455,0.082213,0  
.083695,0.082929,0.080399,0.08167,0.080237,0.082093,0.082441,0.082895,  
0.076327,0.082782,0.082149,0.082042,0.40177,0.39645,0.39296,0.40246,0.  
40094,0.39431,0.38973,0.23117,0.21595,0.23253,0.22058,0.20995,0.18538,  
0.19733,0.19401,0.18883,0.18668,0.17574,0.16945,0.18787,0.08074,0.0832  
45,0.086831,0.082814,0.081262,0.086305,0.076103,0.080698,0.083924,0.08  
2527,0.081939,0.081045,0.08225,0.087566,0.08271,0.085772,0.082055,0.07  
5885,0.3918,0.3933,0.3869,0.39006,0.39745,0.3901,0.22033,0.23365,0.252  
34,0.27844,0.18074,0.19123,0.16358,0.13964,0.19836,0.20941,0.18882,0.1  
6269,0.18689,0.17148,0.084733,0.081839,0.082073,0.082258,0.084143,0.08  
4561,0.080813,0.082153,0.083422,0.081324,0.080408,0.080268,0.081169,0.  
084809,0.082408,0.079018,0.077191,0.082978,0.39192,0.3915,0.38899,0.37  
852,0.39286,0.21392,0.20713,0.23664,0.23004,0.22142,0.18709,0.17463,0.  
2022,0.20444,0.16436,0.18015,0.18873,0.21201,0.19484,0.19661,0.084123,  
0.084437,0.078388,0.076687,0.08195,0.080027,0.082655,0.083655,0.082148  
,0.082058,0.083091,0.082655,0.08408,0.079763,0.083728,0.080121,0.08187  
6,0.082737,0.39435,0.39163,0.39582,0.19494,0.24654,0.25687,0.21194,0.2  
4416,0.22737,0.23277,0.2462,0.19749,0.18435,0.19579,0.14066,0.18765,0.  
17776,0.18857,0.21152,0.18138,0.08368,0.081446,0.08078,0.08477,0.08245  
1,0.081473,0.082877,0.082591,0.080906,0.082586,0.082439,0.085577,0.082  
614,0.082499,0.082408,0.082336,0.081359,0.084648,0.40505,0.18863,0.211  
57,0.1937,0.21217,0.23106,0.23154,0.20829,0.22731,0.22798,0.18692,0.15  
416,0.19079,0.18259,0.17989,0.17203,0.16228,0.19479,0.18753,0.082448,0

.085318,0.084233,0.082169,0.082585,0.082739,0.080285,0.080885,0.086492,0.081553,0.078859,0.083354,0.083638,0.088003,0.082612,0.084212,0.084122,0.063814,0.22072,0.22738,0.19869,0.22923,0.23627,0.21491,0.24129,0.19268,0.22848,0.23122,0.17296,0.17368,0.1961,0.20513,0.18501,0.14817,0.20913,0.20309,0.18912,0.081606,0.078333,0.080301,0.081953,0.083337,0.082663,0.084616,0.082091,0.083199,0.081885,0.079849,0.082162,0.082006,0.078859,0.08174,0.083854,0.080419,0.063673,0.23177,0.23073,0.20614,0.2482,0.18981,0.225,0.22883,0.28616,0.23735,0.22398,0.18565,0.18545,0.17463,0.16112,0.18645,0.19053,0.17374,0.18252,0.082141,0.082391,0.083155,0.081209,0.085354,0.081847,0.08319,0.083023,0.082513,0.081982,0.082601,0.082782,0.081249,0.082074,0.082797,0.078052,0.079198,0.08281,0.064002,0.22394,0.19572,0.23769,0.22131,0.22397,0.24284,0.18408,0.24975,0.22101,0.2318,0.19306,0.18719,0.20049,0.20261,0.20719,0.20607,0.19505,0.1827,0.08158,0.081188,0.091358,0.082195,0.085536,0.081841,0.075265,0.085045,0.085375,0.085336,0.081539,0.085648,0.079708,0.08259,0.086604,0.082301,0.083262,0.064865,0.064531,0.063514,0.23498,0.22533,0.18483,0.22604,0.22843,0.23175,0.22251,0.25499,0.22687,0.18692,0.18583,0.16163,0.1856,0.18324,0.19767,0.082604,0.082921,0.084463,0.080278,0.083923,0.080949,0.083307,0.081728,0.08615,0.083324,0.077565,0.08322,0.081599,0.081711,0.082755,0.08603,0.082687,0.082904,0.063424,0.063628,0.062881,0.064652,0.2276,0.21227,0.23105,0.2139,0.21983,0.25066,0.24322,0.23099,0.15455,0.18737,0.17789,0.17764,0.079315,0.08477,0.082187,0.086577,0.082474,0.081573,0.082169,0.082748,0.08339,0.078401,0.077823,0.08309,0.081318,0.083269,0.082799,0.082061,0.076687,0.081732,0.083497,0.08325,0.062852,0.064355,0.063365,0.064002,0.065404,0.06427,0.28632,0.21138,0.23142,0.23285,0.2247,0.26292,0.2014,0.27869,0.077211,0.084083,0.081782,0.082789,0.08252,0.082054,0.080168,0.081638,0.081919,0.085218,0.079812,0.081415,0.082758,0.083415,0.080155,0.081914,0.079914,0.08229,0.079302,0.084087,0.091919,0.083399,0.082389,0.062809,0.063995,0.064163,0.065041,0.064154,0.064826,0.22479,0.23232,0.25046,0.23655,0.22828,0.064574,0.063158,0.082407,0.085295,0.083195,0.084026,0.085334,0.08206,0.083925,0.07814,0.083427,0.080616,0.082483,0.082664,0.079628,0.081056,0.080225,0.081125,0.084744,0.081449,0.082716,0.082428,0.083073,0.063398,0.06488,0.062545,0.064041,0.063987,0.065244,0.064543,0.064127,0.063354,0.064443,0.23205,0.24064,0.064449,0.063838,0.061561,0.065051,0.082648,0.083083,0.083254,0.083042,0.081524,0.082646,0.08177,0.079666,0.082006,0.083117,0.080047,0.081635,0.081634,0.08608,0.082716,0.082356,0.078407,0.083127,0.08221,0.064356,0.064709,0.063615,0.064403,0.063742,0.064199,0.064544,0.063172,0.063993,0.06381,0.063307,0.063761,0.063382,0.064627,0.064517,0.063135,0.064401,0.082802,0.083064,0.082728,0.086579,0.083721,0.082652,0.082478,0.082097,0.079931,0.080473,0.083872,0.083061,0.082505,0.085189,0.082488,0.073561,0.064344,0.063464,0.063892,0.064359,0.065135,0.063245,0.063207,0.063093,0.063937,0.063765,0.064548,0.063152,0.064061,0.062834,0.061935,0.063067,0.064443,0.062972,0.064673,0.079799,0.081441,0.08168,0.08372,0.082067,0.082932,0.085225,0.077591,0.080497,0.080841,0.084185,0.082156,0.08063,0.063641,0.063319,0.063119,0.064494,0.063407,0.064134,0.064493,0.063596,0.0642,0.064147,0.064319,0.063826,0.063434,0.063916,0.062953,0.063237,0.063441,0.064149,0.064704,0.063363,0.064103,0.085044,0.084822,0.080904,0.080363,0.083191,0.076231,0.080892,0.078711,0.082876,0.063958,0.064531,0.063118,0.063443,0.06474,0.063421,0.064282,0.063474,0.063917,0.064347,0.064595,0.063858,0.063435,0.063695,0.064829,0.063102,0.0619,0.063285,0.06382,0.064596,0.06295,0

.063241,0.063226,0.062894,0.06452,0.077156,0.084919,0.083288,0.08164,0.064043,0.06339,0.064133,0.063925,0.063533,0.063991,0.064502,0.064051,0.064263,0.064272,0.064189,0.063997,0.064496,0.063109,0.063986,0.064631,0.063931,0.064635,0.063137,0.063582,0.063014,0.063828,0.064129,0.064241,0.063495,0.06345,0.064498,0.063146,0.063961,0.063737,0.065073,0.062956,0.063584,0.06367,0.063779,0.063811,0.063408,0.062991,0.064289,0.064032,0.06347,0.064392,0.063636,0.064583,0.06387,0.062961,0.064263,0.065456,0.06452,0.064591,0.06422,0.063756,0.063619,0.064069,0.06389,0.062828,0.063693,0.064486,0.063106,0.063899,0.064666,0.064554,0.064403,0.063058,0.062126,0.064558,0.063497,0.064763,0.064856,0.063632,0.063992,0.064928,0.063596,0.06419,0.064707,0.063805,0.063836,0.063119,0.064235,0.063899,0.064534,0.063792,0.063564,0.062804,0.063866,0.064385,0.063911,0.063568,0.064235,0.064556,0.063047,0.063184,0.062875,0.064257,0.063347,0.064336,0.063666,0.062967,0.064355,0.063291,0.063801,0.063147,0.064696,0.062661,0.064409,0.063321,0.06469,0.06396,0.062938,0.063298,0.064992,0.064083,0.064714,0.064571,0.064312,0.063306,0.063428,0.063666,0.064149,0.064286,0.065381,0.063737,0.063803,0.064208,0.064644,0.06295,0.06291,0.0636,0.062551,0.063523,0.063468,0.064358,0.06404,0.064894,0.063628,0.063619,0.064346,0.063488,0.063267,0.062665,0.065317,0.063318,0.064031,0.064304,0.064528,0.064081,0.063976,0.063991,0.06285,0.063412,0.06303,0.064233,0.063704,0.063928,0.063568,0.063449,0.063503,0.064037,0.063353,0.064971,0.062918,0.063994,0.064253,0.064186,0.063599,0.06358,0.063219,0.063976,0.064126,0.063363,0.063434,0.064058,0.064126,0.063399,0.063883,0.063885,0.063023,0.064235,0.064003,0.064309,0.063625,0.064119,0.062682,0.064104,0.063191,0.063068,0.065252,0.064461,0.065291,0.064207,0.064816,0.064442,0.063393,0.064271,0.064632,0.09345,0.093455,0.093834,0.093568,0.09469,0.093557,0.094238,0.094036,0.093355,0.093834,0.093561,0.093805,0.094107,0.092829,0.093707,0.093852,0.094869,0.093855,0.093991,0.093226,0.21697,0.23481,0.25132,0.19735,0.093703,0.093763,0.093611,0.094206,0.092908,0.094009,0.093664,0.0942,0.094632,0.092893,0.094279,0.09356,0.093784,0.094524,0.094394,0.37365,0.23675,0.24146,0.23128,0.23415,0.24522,0.25658,0.093808,0.093385,0.09471,0.093776,0.094942,0.093409,0.093725,0.094143,0.09335,0.092531,0.09337,0.094064,0.094094,0.094107,0.093491,0.37983,0.37414,0.21445,0.27176,0.24258,0.24177,0.24864,0.25406,0.24315,0.23153,0.093151,0.093104,0.093851,0.093817,0.093217,0.093775,0.093579,0.093248,0.093751,0.093935,0.093383,0.094026,0.094765,0.094259,0.094229,0.38727,0.38151,0.37234,0.2254,0.21147,0.24072,0.23853,0.23341,0.23826,0.23411,0.20707,0.26033,0.092896,0.093999,0.094112,0.093598,0.094177,0.094472,0.093675,0.093853,0.093675,0.094689,0.093421,0.093536,0.094317,0.093456,0.09419,0.094279,0.38719,0.37668,0.37285,0.38304,0.21972,0.24841,0.2743,0.23698,0.23403,0.23719,0.23098,0.24507,0.20328,0.23861,0.094082,0.093829,0.094791,0.093751,0.094116,0.093556,0.093597,0.093947,0.093681,0.093838,0.094134,0.093978,0.093803,0.093081,0.093385,0.094887,0.38779,0.38505,0.37806,0.38354,0.38158,0.38346,0.21851,0.23817,0.24891,0.22692,0.24893,0.24605,0.23567,0.2359,0.26192,0.23804,0.094182,0.093562,0.09451,0.093146,0.093823,0.093562,0.093981,0.093774,0.0933,0.09318,0.093538,0.094214,0.095003,0.093583,0.094279,0.093811,0.094125,0.39929,0.3875,0.37125,0.3804,0.38586,0.38639,0.22756,0.26397,0.2537,0.23414,0.23293,0.23384,0.24797,0.28086,0.23603,0.24246,0.23767,0.093874,0.093776,0.094332,0.093109,0.093794,0.094361,0.093676,0.093099,0.093697,0.094122,0.093557,0.094052,0.094034,0.07808,0.077435,0.077842,0.093884,0.37358,0.38362,0.379

99,0.38693,0.37693,0.38189,0.37987,0.23391,0.24884,0.23949,0.25727,0.2  
265,0.23175,0.24045,0.18259,0.22901,0.2389,0.23104,0.092673,0.093435,0  
.094056,0.093575,0.093652,0.093617,0.094157,0.093554,0.093573,0.093899  
,0.093249,0.074567,0.076584,0.078882,0.074698,0.076985,0.076108,0.0936  
1,0.38256,0.37281,0.38476,0.38153,0.37706,0.37516,0.40318,0.22897,0.26  
069,0.22378,0.25441,0.23903,0.24107,0.2414,0.23632,0.22969,0.23669,0.2  
1771,0.093431,0.093467,0.092626,0.093243,0.093554,0.092204,0.094132,0.  
094277,0.094136,0.077892,0.077373,0.080234,0.081339,0.079899,0.076975,  
0.076039,0.076431,0.077878,0.093824,0.37875,0.37975,0.37268,0.37962,0.  
38318,0.37486,0.38547,0.22895,0.24501,0.2258,0.23775,0.23954,0.24871,0  
.24083,0.24002,0.24096,0.23482,0.239,0.22663,0.09331,0.093832,0.094266  
,0.095157,0.093713,0.094411,0.074418,0.075374,0.076878,0.077736,0.0779  
26,0.079208,0.077966,0.074883,0.077254,0.075048,0.080099,0.078018,0.37  
971,0.38858,0.37972,0.38521,0.38224,0.37759,0.38368,0.2387,0.23125,0.2  
424,0.23481,0.23024,0.22757,0.23623,0.28129,0.21748,0.23533,0.24125,0.  
22701,0.094842,0.094692,0.093248,0.079133,0.07622,0.077433,0.076745,0.  
077659,0.078028,0.07693,0.078904,0.076848,0.077375,0.083996,0.078899,0  
.078477,0.075459,0.076929,0.38409,0.3878,0.3792,0.38105,0.37951,0.3854  
8,0.37464,0.37578,0.38436,0.25312,0.23497,0.23721,0.22656,0.19876,0.23  
756,0.26009,0.25841,0.17718,0.22422,0.24063,0.076883,0.076294,0.076664  
,0.076322,0.076569,0.078876,0.078419,0.07673,0.073267,0.077334,0.07835  
4,0.07888,0.076178,0.076884,0.079547,0.078629,0.076997,0.07815,0.3878,  
0.38466,0.38651,0.37918,0.3763,0.37923,0.38705,0.39722,0.37901,0.22725  
,0.23739,0.18605,0.20472,0.15141,0.18471,0.18193,0.16991,0.19026,0.181  
75,0.18052,0.076665,0.079309,0.077426,0.079557,0.076447,0.077642,0.073  
706,0.076469,0.077588,0.075288,0.077377,0.077816,0.078405,0.074679,0.0  
77414,0.076556,0.076501,0.077393,0.38623,0.37895,0.38885,0.37242,0.382  
86,0.37531,0.39126,0.37626,0.38925,0.22766,0.17497,0.15647,0.17506,0.1  
8891,0.17002,0.18158,0.17005,0.18377,0.16709,0.18464,0.071917,0.078368  
,0.077407,0.082225,0.078413,0.077175,0.078849,0.078176,0.075301,0.0765  
74,0.075163,0.077027,0.077344,0.077785,0.071667,0.077751,0.076931,0.07  
6904,0.38829,0.38496,0.38343,0.39098,0.39066,0.38377,0.37858,0.22402,0  
.20819,0.22662,0.21162,0.20247,0.17679,0.19051,0.18684,0.18142,0.17987  
,0.16804,0.1622,0.17946,0.076133,0.078105,0.081211,0.077768,0.076002,0  
.080465,0.071873,0.075897,0.078542,0.07756,0.076737,0.076206,0.077126,  
0.081839,0.077647,0.080282,0.076927,0.071423,0.38123,0.38357,0.37877,0  
.37923,0.38398,0.37997,0.21312,0.22559,0.24746,0.26725,0.17516,0.18476  
,0.15817,0.13366,0.19026,0.20167,0.18145,0.15577,0.1813,0.16524,0.0793  
97,0.076487,0.077187,0.07732,0.079076,0.079494,0.075957,0.077169,0.078  
266,0.076761,0.07539,0.075673,0.07652,0.079675,0.077276,0.07425,0.0724  
03,0.078072,0.38234,0.38061,0.38159,0.37141,0.38697,0.20786,0.20216,0.  
22948,0.22468,0.21503,0.18285,0.16812,0.19603,0.19644,0.15635,0.17319,  
0.18171,0.20451,0.18859,0.18899,0.078937,0.079121,0.073621,0.072235,0.  
077073,0.075163,0.077391,0.078112,0.077103,0.077283,0.078161,0.077555,  
0.078412,0.074749,0.078585,0.074862,0.076942,0.077721,0.38019,0.38369,  
0.38383,0.18934,0.23706,0.24917,0.20479,0.23585,0.22151,0.22643,0.2398  
3,0.19019,0.17705,0.18674,0.13487,0.18131,0.1711,0.18117,0.20498,0.173  
27,0.078415,0.076874,0.075674,0.079444,0.076971,0.076311,0.078061,0.07  
7151,0.07602,0.076986,0.077029,0.080136,0.077654,0.077692,0.07726,0.07  
7146,0.076468,0.079215,0.39261,0.1813,0.20351,0.18844,0.2058,0.22387,0  
.22545,0.20297,0.21978,0.22171,0.1792,0.14715,0.18396,0.1742,0.17248,0  
.16601,0.15516,0.18823,0.18076,0.077292,0.080204,0.079004,0.077331,0.0

7725,0.077659,0.075556,0.075964,0.080782,0.076671,0.073952,0.07797,0.0  
78612,0.082182,0.077406,0.079009,0.078628,0.061137,0.21395,0.22059,0.1  
932,0.22268,0.23002,0.20847,0.23205,0.18746,0.22055,0.22633,0.16825,0.  
16765,0.18981,0.1984,0.17936,0.14158,0.20269,0.19423,0.18225,0.076597,  
0.074023,0.075606,0.076787,0.07811,0.077447,0.079589,0.077241,0.078201  
,0.077027,0.075134,0.077197,0.076888,0.074093,0.076764,0.078397,0.0754  
77,0.060903,0.22588,0.22485,0.19975,0.24429,0.1822,0.21836,0.22138,0.2  
743,0.23009,0.21525,0.17869,0.17904,0.16654,0.15519,0.17827,0.18195,0.  
16661,0.17588,0.07705,0.077282,0.077607,0.07642,0.079916,0.076623,0.07  
7956,0.077729,0.077662,0.076778,0.077682,0.077367,0.076734,0.077096,0.  
077804,0.073744,0.074694,0.077719,0.061124,0.21695,0.19145,0.22867,0.2  
1613,0.2172,0.23624,0.17737,0.24329,0.21444,0.22213,0.18717,0.17986,0.  
19258,0.1935,0.20026,0.19912,0.18578,0.1751,0.076976,0.076171,0.085664  
,0.077159,0.079841,0.07635,0.07082,0.079937,0.080313,0.079618,0.076585  
,0.080533,0.075021,0.077025,0.081229,0.077174,0.077956,0.061446,0.0613  
85,0.059912,0.22858,0.21951,0.18065,0.21896,0.22187,0.22432,0.21565,0.  
24657,0.21993,0.18048,0.17799,0.15557,0.17859,0.17859,0.19132,0.077424  
,0.077449,0.07917,0.07507,0.078936,0.076082,0.07868,0.076671,0.080763,  
0.077766,0.072742,0.07788,0.076912,0.077075,0.077583,0.080787,0.077584  
,0.077624,0.059977,0.06042,0.059701,0.061594,0.22112,0.20619,0.22221,0  
.20599,0.21441,0.24517,0.23576,0.22343,0.14918,0.17995,0.17212,0.16981  
,0.074421,0.079458,0.077332,0.08077,0.077185,0.07662,0.077168,0.077501  
,0.078776,0.073829,0.073316,0.07832,0.076572,0.077959,0.077695,0.07718  
7,0.07227,0.077211,0.07837,0.077836,0.059601,0.061078,0.059832,0.06095  
6,0.062024,0.060862,0.27827,0.20522,0.22374,0.22338,0.2175,0.25443,0.1  
9433,0.27036,0.073068,0.0788,0.076801,0.077592,0.077419,0.077339,0.075  
495,0.076794,0.076984,0.079825,0.075286,0.076153,0.077972,0.078335,0.0  
74642,0.07694,0.074834,0.077029,0.074688,0.079013,0.085611,0.077879,0.  
077556,0.059902,0.060678,0.061067,0.061663,0.06108,0.061601,0.21742,0.  
22584,0.2414,0.23038,0.21984,0.061462,0.060232,0.077338,0.080118,0.077  
982,0.07917,0.079783,0.077298,0.07867,0.073771,0.078498,0.075826,0.077  
289,0.077665,0.074569,0.076175,0.075702,0.075824,0.079571,0.076274,0.0  
77401,0.077391,0.077787,0.06025,0.061717,0.059575,0.060908,0.06068,0.0  
61592,0.061395,0.060567,0.060625,0.061343,0.22433,0.23211,0.0608,0.060  
824,0.058236,0.061908,0.077474,0.077852,0.078022,0.077795,0.076961,0.0  
7779,0.076929,0.075245,0.076916,0.078228,0.075307,0.07677,0.076626,0.0  
8025,0.077681,0.0771,0.073873,0.077998,0.077145,0.061345,0.061538,0.06  
035,0.060644,0.060429,0.060594,0.061009,0.060344,0.060738,0.06062,0.05  
983,0.06082,0.060351,0.061068,0.061561,0.060421,0.060775,0.07783,0.077  
518,0.07769,0.081018,0.07833,0.077285,0.077312,0.076859,0.075372,0.075  
886,0.07859,0.077598,0.077704,0.079338,0.077604,0.069666,0.061064,0.06  
0683,0.060452,0.060925,0.061955,0.060167,0.060265,0.060131,0.061126,0.  
061033,0.061298,0.060223,0.061329,0.059647,0.058869,0.059593,0.061104,  
0.059931,0.0614,0.074709,0.07653,0.076836,0.078778,0.07714,0.077872,0.  
079876,0.073065,0.075307,0.075746,0.079128,0.077042,0.075784,0.060879,  
0.060112,0.060085,0.061388,0.060526,0.060983,0.061307,0.060288,0.06092  
1,0.060838,0.061064,0.060387,0.060658,0.060589,0.060195,0.060477,0.060  
622,0.061052,0.061347,0.06033,0.060432,0.079528,0.079619,0.07609,0.075  
574,0.077885,0.071701,0.075964,0.073912,0.077646,0.061006,0.061205,0.0  
60388,0.060115,0.062054,0.060371,0.060993,0.060429,0.061081,0.061292,0  
.06145,0.060893,0.060389,0.060736,0.061451,0.060085,0.058805,0.059983,  
0.060509,0.061388,0.059545,0.06048,0.060023,0.059799,0.061221,0.0732,0

.079814,0.077787,0.076666,0.060844,0.06016,0.060829,0.060773,0.060458,  
0.061324,0.061716,0.060777,0.060772,0.061131,0.061072,0.060936,0.06071  
3,0.060566,0.060845,0.061525,0.06093,0.061772,0.060077,0.060805,0.0598  
84,0.060673,0.061125,0.060967,0.060483,0.060383,0.061422,0.060116,0.06  
0858,0.06058,0.061524,0.059692,0.060545,0.060175,0.060618,0.060432,0.0  
60414,0.059545,0.061064,0.060936,0.060475,0.061292,0.060403,0.061399,0  
.060444,0.059808,0.061202,0.062731,0.061367,0.061884,0.060849,0.060161  
,0.060596,0.060888,0.060728,0.059666,0.060566,0.061283,0.060162,0.0606  
2,0.061533,0.061024,0.061554,0.060191,0.059126,0.061225,0.06061,0.0618  
13,0.061287,0.060443,0.060879,0.06221,0.060613,0.061251,0.061467,0.060  
407,0.06052,0.060476,0.061334,0.060638,0.06169,0.060611,0.060154,0.060  
063,0.060625,0.061184,0.060351,0.06055,0.061225,0.061291,0.059957,0.05  
9998,0.060108,0.061102,0.060246,0.061207,0.060315,0.059968,0.061441,0.  
060109,0.061147,0.060418,0.061344,0.060141,0.060955,0.060118,0.061491,  
0.061187,0.060127,0.060574,0.061815,0.061114,0.061205,0.0614,0.060815,  
0.060371,0.06036,0.060561,0.061031,0.06131,0.06208,0.060815,0.060583,0  
.060795,0.061979,0.059665,0.059564,0.060142,0.059609,0.060508,0.060402  
,0.060936,0.060852,0.061674,0.060509,0.060625,0.061642,0.060996,0.0602  
04,0.059852,0.061993,0.060466,0.060994,0.061248,0.061603,0.061168,0.06  
1012,0.060306,0.059846,0.059904,0.060166,0.061305,0.060507,0.060703,0.  
060215,0.060196,0.060045,0.06061,0.060645,0.061695,0.059918,0.060645,0  
.061072,0.060929,0.060591,0.060453,0.06041,0.060894,0.060951,0.060332,  
0.06009,0.060848,0.061248,0.060517,0.060438,0.061256,0.060029,0.060964  
,0.060825,0.060778,0.060634,0.061122,0.059554,0.060915,0.060334,0.0602  
81,0.061683,0.061465,0.062175,0.061013,0.061592,0.061836,0.060323,0.06  
0841,0.061713  
0.088151,0.088132,0.088343,0.08798,0.088876,0.087899,0.088357,0.088501  
,0.087839,0.088152,0.088312,0.088485,0.088227,0.087576,0.088513,0.0881  
95,0.089608,0.088235,0.088733,0.087761,0.21303,0.22965,0.24725,0.19134  
,0.087692,0.088103,0.088122,0.088408,0.087452,0.08871,0.088592,0.08873  
9,0.08896,0.087534,0.088951,0.087769,0.088297,0.089283,0.088928,0.3695  
4,0.23108,0.23303,0.22621,0.22738,0.24001,0.25306,0.088441,0.087421,0.  
089218,0.088096,0.089367,0.088361,0.088208,0.088475,0.088075,0.087106,  
0.087945,0.088452,0.088657,0.088268,0.088385,0.37035,0.36973,0.21049,0  
.26723,0.23641,0.23546,0.24262,0.24513,0.23826,0.22504,0.087536,0.0872  
91,0.088594,0.088309,0.08763,0.087903,0.088122,0.087595,0.088111,0.088  
637,0.088175,0.088507,0.089028,0.088872,0.088273,0.38031,0.375,0.36656  
,0.22028,0.2069,0.2346,0.23153,0.22634,0.23461,0.22927,0.20039,0.25187  
,0.087134,0.088466,0.088316,0.087946,0.088498,0.088946,0.088353,0.0878  
36,0.088342,0.089287,0.087738,0.087855,0.088539,0.087993,0.088187,0.08  
8606,0.38206,0.37043,0.37102,0.37426,0.21302,0.2438,0.26691,0.23024,0.  
22784,0.22929,0.22554,0.23945,0.19512,0.23191,0.088299,0.088197,0.0891  
3,0.088533,0.088551,0.087804,0.087576,0.088243,0.08806,0.088137,0.0888  
37,0.088474,0.087967,0.087418,0.087591,0.089005,0.38037,0.37938,0.3731  
7,0.37864,0.37718,0.37605,0.21156,0.23241,0.24345,0.22064,0.24424,0.23  
74,0.22725,0.23033,0.25256,0.23076,0.088721,0.087754,0.089033,0.087861  
,0.088286,0.088025,0.08849,0.088061,0.087744,0.087853,0.088052,0.08869  
6,0.089136,0.08821,0.088517,0.088353,0.088477,0.39045,0.38227,0.36689,  
0.37583,0.37739,0.38125,0.2205,0.25538,0.24694,0.22593,0.2277,0.22808,  
0.23849,0.27724,0.23074,0.23574,0.231,0.088346,0.088094,0.088702,0.087  
667,0.088574,0.089011,0.087844,0.087736,0.088134,0.088422,0.088348,0.0  
88763,0.088619,0.074257,0.073487,0.074117,0.088376,0.36516,0.37484,0.3

7658,0.37866,0.36892,0.3769,0.37118,0.22627,0.2437,0.23324,0.24821,0.2  
1873,0.2258,0.23533,0.17506,0.22294,0.23418,0.22597,0.087206,0.08741,0  
.088426,0.087907,0.087942,0.088005,0.0889,0.087877,0.088217,0.08826,0.  
08753,0.070792,0.072925,0.075059,0.0711,0.073354,0.072484,0.087745,0.3  
7678,0.371,0.37546,0.37404,0.37186,0.36868,0.39493,0.22067,0.25524,0.2  
1629,0.24643,0.2306,0.23426,0.23483,0.22802,0.22223,0.23086,0.21047,0.  
087562,0.088065,0.087036,0.087948,0.088088,0.087028,0.088384,0.088861,  
0.088291,0.073827,0.073875,0.076149,0.077377,0.075655,0.073045,0.07218  
4,0.07277,0.074178,0.088244,0.36368,0.37134,0.36297,0.37233,0.37514,0.  
36816,0.37667,0.22439,0.23974,0.22233,0.2318,0.23189,0.24319,0.23251,0  
.23261,0.23669,0.22773,0.23295,0.21894,0.087769,0.088226,0.088646,0.08  
9475,0.088161,0.088943,0.070519,0.071907,0.073193,0.073619,0.073919,0.  
075328,0.073544,0.07123,0.073449,0.071639,0.076054,0.074251,0.37661,0.  
38125,0.37298,0.37438,0.37322,0.37545,0.37947,0.23306,0.22422,0.23525,  
0.22979,0.22574,0.22239,0.23123,0.27622,0.21001,0.22707,0.23475,0.2208  
,0.088957,0.089289,0.087863,0.074957,0.072572,0.073486,0.073178,0.0743  
03,0.074023,0.073015,0.075105,0.072691,0.073723,0.07943,0.074994,0.074  
381,0.071638,0.073558,0.37349,0.38415,0.37099,0.37288,0.37509,0.37718,  
0.37051,0.36624,0.37766,0.2485,0.2271,0.23249,0.21967,0.1916,0.23128,0  
.25214,0.25098,0.17206,0.21666,0.23547,0.073274,0.072552,0.073223,0.07  
2637,0.072976,0.074872,0.074608,0.073147,0.070072,0.07356,0.074602,0.0  
7521,0.072402,0.07303,0.07539,0.074894,0.073196,0.074374,0.37958,0.377  
62,0.37789,0.37171,0.36966,0.37421,0.37824,0.39222,0.37659,0.222,0.230  
76,0.18091,0.20071,0.14664,0.18001,0.17624,0.16546,0.18459,0.1753,0.17  
581,0.072626,0.074939,0.073193,0.075697,0.072756,0.073572,0.070232,0.0  
72969,0.073709,0.071662,0.073322,0.074017,0.074874,0.071117,0.073601,0  
.072672,0.072889,0.073633,0.37935,0.37558,0.3744,0.36609,0.37751,0.369  
21,0.3837,0.36638,0.38013,0.22337,0.17046,0.15182,0.17091,0.18352,0.16  
416,0.17663,0.16686,0.1791,0.16207,0.17855,0.068258,0.074467,0.073512,  
0.078069,0.074469,0.073623,0.074918,0.074172,0.071624,0.072711,0.07182  
7,0.0736,0.073463,0.07381,0.068067,0.073871,0.073345,0.073206,0.38049,  
0.38133,0.37686,0.38737,0.3804,0.37616,0.36701,0.21989,0.20532,0.223,0  
.20513,0.19879,0.17095,0.18542,0.18211,0.17764,0.17662,0.16331,0.15653  
,0.17622,0.072557,0.074293,0.077264,0.073702,0.072134,0.076391,0.06842  
8,0.072777,0.074661,0.074059,0.07275,0.072705,0.073452,0.077728,0.0737  
24,0.076583,0.073351,0.0687,0.37355,0.37626,0.36944,0.37298,0.38463,0.  
37549,0.20907,0.22296,0.23906,0.26344,0.17182,0.18018,0.15398,0.12938,  
0.18451,0.19504,0.17782,0.15193,0.17683,0.16,0.075278,0.072858,0.07330  
7,0.073181,0.075387,0.075205,0.072151,0.073483,0.074437,0.073101,0.071  
74,0.072423,0.072646,0.075735,0.073638,0.070531,0.068729,0.074612,0.37  
498,0.37646,0.37583,0.37051,0.37993,0.20431,0.19699,0.224,0.2197,0.209  
79,0.1779,0.16342,0.19007,0.19065,0.15275,0.16832,0.17838,0.20111,0.18  
379,0.18375,0.075369,0.074566,0.070124,0.069074,0.073649,0.07159,0.073  
592,0.074024,0.073129,0.073665,0.074333,0.073531,0.074247,0.071207,0.0  
74789,0.071399,0.073021,0.07377,0.36816,0.38143,0.37207,0.18426,0.2302  
4,0.2449,0.19977,0.23078,0.21419,0.21908,0.23497,0.18319,0.17357,0.180  
53,0.13069,0.17608,0.16588,0.17608,0.20092,0.16861,0.074792,0.073177,0  
.072126,0.075368,0.073129,0.072606,0.074686,0.072939,0.072239,0.073085  
,0.07336,0.075988,0.073939,0.073908,0.073419,0.073534,0.07311,0.075318  
,0.38393,0.17763,0.20123,0.18571,0.20052,0.21913,0.22203,0.19977,0.214  
04,0.2168,0.17392,0.14339,0.17814,0.16996,0.16626,0.16027,0.15138,0.18  
344,0.17492,0.073491,0.075978,0.074909,0.073488,0.073286,0.073897,0.07



1707,0.072052,0.076391,0.072674,0.070703,0.074331,0.074743,0.077825,0.073984,0.074902,0.074956,0.058833,0.20856,0.21732,0.18964,0.21596,0.22337,0.20313,0.22717,0.18242,0.21648,0.22293,0.16188,0.16309,0.18404,0.1945,0.1758,0.13674,0.19656,0.18902,0.17672,0.073234,0.070356,0.0722,0.072854,0.074142,0.073556,0.075919,0.073519,0.074062,0.073142,0.071696,0.073524,0.072945,0.070925,0.07306,0.074152,0.071996,0.059157,0.22212,0.22237,0.19542,0.24165,0.17763,0.21168,0.21702,0.27016,0.22756,0.20985,0.17319,0.17237,0.16019,0.15123,0.17227,0.17644,0.16169,0.16908,0.073451,0.073447,0.074037,0.072731,0.075857,0.0735,0.074603,0.073617,0.074109,0.072567,0.073892,0.073555,0.073112,0.073658,0.073704,0.070267,0.070851,0.073567,0.058818,0.21106,0.18768,0.21993,0.20974,0.21324,0.23031,0.17178,0.23581,0.20749,0.21843,0.18067,0.17572,0.18761,0.18871,0.1953,0.19269,0.17986,0.17301,0.073442,0.072137,0.080912,0.073263,0.075705,0.072817,0.068278,0.076032,0.075995,0.075638,0.072615,0.076175,0.071137,0.073409,0.076725,0.073301,0.073536,0.059359,0.059356,0.057627,0.22379,0.21454,0.17742,0.21472,0.21703,0.21723,0.21147,0.24099,0.2143,0.17616,0.17292,0.15053,0.17361,0.17429,0.18725,0.074007,0.073724,0.075122,0.071586,0.075042,0.072618,0.074959,0.072994,0.076599,0.073839,0.069597,0.073876,0.073007,0.073396,0.073601,0.07651,0.073752,0.073426,0.0581,0.058119,0.057872,0.059401,0.21931,0.20071,0.21612,0.20009,0.20903,0.24023,0.23129,0.21853,0.14507,0.17466,0.16687,0.16395,0.070725,0.075293,0.073474,0.076626,0.073596,0.073133,0.073256,0.073896,0.074908,0.069991,0.069495,0.07456,0.072693,0.073951,0.074193,0.073414,0.068793,0.073266,0.074625,0.07403,0.057273,0.058869,0.057644,0.058635,0.060064,0.058811,0.27177,0.19928,0.2196,0.21969,0.21471,0.24847,0.18949,0.26541,0.069662,0.074453,0.073278,0.07392,0.073537,0.074058,0.07198,0.073322,0.073311,0.075765,0.071665,0.072533,0.074012,0.074006,0.0707,0.073275,0.071578,0.073105,0.071502,0.075168,0.080944,0.073895,0.073659,0.057547,0.058418,0.058897,0.059687,0.059184,0.05942,0.21249,0.22191,0.23598,0.22418,0.21547,0.059172,0.058175,0.073127,0.07627,0.07423,0.075159,0.075365,0.073377,0.07482,0.070202,0.074628,0.072515,0.073366,0.073989,0.071001,0.072672,0.071779,0.072346,0.076032,0.072708,0.073563,0.073426,0.073825,0.058686,0.059239,0.057488,0.058593,0.058513,0.059619,0.059381,0.05877,0.058913,0.059321,0.21898,0.22756,0.058759,0.058556,0.056388,0.059547,0.073472,0.073537,0.07417,0.074111,0.072956,0.073987,0.073296,0.07164,0.072846,0.074127,0.071651,0.072627,0.073133,0.07593,0.073762,0.073241,0.070056,0.074072,0.073499,0.059101,0.05938,0.058211,0.058816,0.05838,0.058507,0.059106,0.058494,0.05835,0.058626,0.058175,0.05871,0.057959,0.058717,0.059369,0.058136,0.058889,0.073853,0.073672,0.073988,0.076994,0.074362,0.073495,0.073557,0.072926,0.071565,0.071978,0.074445,0.073747,0.073868,0.075536,0.073825,0.066285,0.058674,0.058308,0.058428,0.058797,0.05947,0.05818,0.058139,0.058104,0.059148,0.058865,0.059114,0.058558,0.059504,0.057622,0.056445,0.057418,0.059336,0.057548,0.059322,0.07115,0.072479,0.073047,0.074836,0.073888,0.073767,0.075815,0.069781,0.071628,0.072106,0.075484,0.073686,0.071896,0.058601,0.058167,0.057935,0.05894,0.058307,0.058466,0.059043,0.058205,0.058889,0.058725,0.059141,0.057984,0.058575,0.058666,0.058133,0.058782,0.05876,0.059118,0.059485,0.058013,0.058232,0.075178,0.075493,0.072181,0.071775,0.073672,0.068243,0.072481,0.070206,0.07376,0.058629,0.058958,0.058302,0.05763,0.059509,0.05854,0.058692,0.058666,0.059111,0.059515,0.060082,0.058888,0.057601,0.059091,0.060069,0.057989,0.057415,0.058087,0.058728,0.059814,0.057528,0.058606,0.058077,0.057637,0.059874,0.069888,

0.075957,0.073577,0.073342,0.058335,0.05817,0.05904,0.058665,0.058898,  
0.059314,0.05975,0.058695,0.058988,0.059318,0.059336,0.059373,0.058854  
,0.058578,0.058539,0.059289,0.058746,0.059206,0.058136,0.058296,0.0581  
9,0.058676,0.059428,0.05898,0.058618,0.058505,0.059454,0.058281,0.0588  
37,0.058706,0.059277,0.058117,0.058722,0.058185,0.058539,0.05818,0.058  
475,0.057827,0.05924,0.059185,0.058257,0.058943,0.058411,0.059197,0.05  
8226,0.058195,0.059071,0.060495,0.059499,0.05962,0.058645,0.058053,0.0  
58616,0.058295,0.058619,0.057703,0.058758,0.059133,0.058211,0.058104,0  
.059815,0.059191,0.059956,0.058484,0.057202,0.058902,0.058749,0.059541  
,0.059212,0.058748,0.058837,0.059582,0.058381,0.059437,0.059719,0.0580  
86,0.058629,0.058114,0.059114,0.058438,0.059171,0.058491,0.057978,0.05  
7733,0.058364,0.059182,0.057908,0.05849,0.059104,0.059348,0.05807,0.05  
8247,0.058251,0.059251,0.058361,0.058854,0.058858,0.058124,0.059444,0.  
057766,0.058757,0.058284,0.059282,0.05804,0.058858,0.057878,0.059098,0  
.058867,0.05809,0.058045,0.059694,0.058893,0.059192,0.059152,0.059046,  
0.058033,0.058361,0.058173,0.059097,0.058888,0.059913,0.058583,0.05859  
8,0.058906,0.059664,0.058094,0.058022,0.058218,0.057182,0.058456,0.058  
2,0.059087,0.059016,0.059582,0.058476,0.058508,0.059726,0.059115,0.058  
011,0.057662,0.059535,0.05865,0.058877,0.058926,0.059226,0.05945,0.059  
649,0.058551,0.05799,0.058197,0.058111,0.058948,0.05859,0.058764,0.057  
883,0.058298,0.057904,0.058828,0.058901,0.059471,0.058033,0.058305,0.0  
58754,0.05889,0.058445,0.058397,0.05854,0.058543,0.058825,0.058362,0.0  
57953,0.058716,0.05928,0.058787,0.058285,0.059356,0.057947,0.059022,0.  
058668,0.058907,0.058593,0.058738,0.057295,0.059054,0.058572,0.058207,  
0.059553,0.059795,0.060214,0.058485,0.059756,0.059706,0.057656,0.05844  
,0.05957  
0.083578,0.083918,0.083893,0.083287,0.084382,0.082842,0.084252,0.08391  
1,0.083132,0.084077,0.083799,0.083885,0.083522,0.082797,0.084055,0.083  
765,0.085229,0.084275,0.084206,0.083304,0.20975,0.22456,0.24318,0.1856  
2,0.083397,0.083615,0.083632,0.083828,0.083182,0.08408,0.084491,0.0842  
44,0.084558,0.083213,0.084675,0.083282,0.083808,0.084734,0.084238,0.36  
352,0.22642,0.22821,0.22229,0.22233,0.2327,0.24661,0.083734,0.083366,0  
.084569,0.084082,0.084838,0.084167,0.084001,0.083917,0.083736,0.082881  
,0.083607,0.083976,0.084393,0.083889,0.084128,0.36786,0.36658,0.20582,  
0.26227,0.23241,0.2311,0.24039,0.2414,0.23417,0.22127,0.082886,0.08312  
8,0.084061,0.084086,0.083241,0.08369,0.083887,0.083268,0.083451,0.0842  
83,0.083775,0.084366,0.084364,0.084831,0.083629,0.37384,0.36965,0.3619  
4,0.2147,0.20254,0.2288,0.2243,0.2211,0.23005,0.22397,0.19717,0.24782,  
0.083295,0.084115,0.084365,0.083586,0.084124,0.084228,0.08401,0.083606  
,0.084138,0.084762,0.083109,0.08364,0.083916,0.083679,0.083747,0.08436  
6,0.37371,0.3683,0.36371,0.36873,0.20878,0.23931,0.26298,0.22508,0.224  
37,0.22465,0.21844,0.23122,0.19205,0.22691,0.084259,0.08377,0.084588,0  
.083978,0.084273,0.083558,0.083043,0.083898,0.083601,0.083845,0.084561  
,0.084287,0.083559,0.083351,0.083364,0.084658,0.37564,0.37509,0.3654,0  
.37429,0.37106,0.37443,0.20899,0.22858,0.23634,0.21559,0.23856,0.23193  
,0.2233,0.22727,0.24899,0.2264,0.084002,0.083318,0.084564,0.083316,0.0  
83756,0.083738,0.084011,0.083605,0.08326,0.083578,0.083581,0.084192,0.  
084379,0.083786,0.08405,0.084137,0.084162,0.38258,0.37508,0.36264,0.37  
275,0.37354,0.37575,0.21538,0.25162,0.24334,0.22429,0.22199,0.2231,0.2  
341,0.26989,0.22688,0.23106,0.2256,0.084046,0.083515,0.084287,0.083522  
,0.084134,0.084568,0.083108,0.083325,0.083382,0.084117,0.084173,0.0843  
47,0.083684,0.071106,0.070756,0.070828,0.084219,0.36261,0.36918,0.3657

9, 0.37047, 0.36557, 0.37365, 0.36217, 0.22202, 0.23636, 0.23126, 0.2422, 0.214  
09, 0.21963, 0.23342, 0.16899, 0.21904, 0.23006, 0.21971, 0.083154, 0.083142, 0.  
.083693, 0.083919, 0.083917, 0.083828, 0.084451, 0.083483, 0.08337, 0.083884,  
0.083053, 0.06803, 0.07007, 0.071928, 0.068716, 0.070088, 0.069881, 0.083324,  
0.37522, 0.35898, 0.36689, 0.36833, 0.36716, 0.36314, 0.38585, 0.21511, 0.2501  
6, 0.21091, 0.24103, 0.22673, 0.22857, 0.22985, 0.22543, 0.21765, 0.22515, 0.20  
458, 0.083323, 0.083267, 0.082625, 0.083664, 0.083919, 0.082942, 0.083929, 0.0  
84794, 0.083409, 0.07086, 0.07086, 0.072871, 0.074228, 0.072478, 0.070136, 0.0  
69451, 0.070061, 0.071349, 0.084085, 0.35559, 0.36553, 0.35911, 0.36883, 0.373  
78, 0.3615, 0.37792, 0.22061, 0.23537, 0.21751, 0.22719, 0.22661, 0.23634, 0.22  
803, 0.23018, 0.23267, 0.22172, 0.22709, 0.21403, 0.083116, 0.083703, 0.084087  
, 0.084941, 0.083965, 0.084273, 0.067692, 0.069174, 0.070263, 0.070603, 0.0713  
28, 0.072285, 0.070609, 0.068418, 0.070752, 0.068669, 0.073074, 0.071307, 0.36  
693, 0.37836, 0.37093, 0.37245, 0.37336, 0.37237, 0.37339, 0.22588, 0.22051, 0.  
23156, 0.22635, 0.21977, 0.21827, 0.22717, 0.26876, 0.20471, 0.22191, 0.23086,  
0.21643, 0.084395, 0.085092, 0.083026, 0.072085, 0.06967, 0.070362, 0.070581,  
0.071777, 0.071012, 0.070389, 0.072063, 0.069947, 0.070908, 0.075921, 0.07192  
1, 0.071608, 0.069078, 0.070883, 0.36685, 0.37614, 0.36469, 0.37063, 0.37117, 0  
.36905, 0.367, 0.36311, 0.37417, 0.24269, 0.22373, 0.23, 0.21349, 0.1882, 0.227  
28, 0.24757, 0.24525, 0.16777, 0.21069, 0.23253, 0.070099, 0.069663, 0.070818,  
0.06983, 0.070179, 0.071692, 0.071539, 0.070159, 0.067346, 0.070879, 0.071621  
, 0.072097, 0.069483, 0.070586, 0.07221, 0.071825, 0.070408, 0.071298, 0.3744,  
0.37385, 0.37088, 0.36518, 0.36401, 0.37016, 0.37393, 0.38373, 0.37205, 0.2154  
7, 0.22525, 0.17473, 0.19901, 0.14334, 0.17699, 0.17212, 0.16082, 0.18015, 0.17  
227, 0.173, 0.069689, 0.072099, 0.070449, 0.07246, 0.070259, 0.070107, 0.06789  
2, 0.069687, 0.071079, 0.068749, 0.070189, 0.071461, 0.071919, 0.068817, 0.070  
49, 0.069941, 0.07023, 0.070807, 0.37407, 0.37071, 0.37287, 0.36132, 0.37259, 0  
.36474, 0.38045, 0.36366, 0.36901, 0.21864, 0.16607, 0.14843, 0.1656, 0.18133,  
0.16077, 0.17325, 0.16284, 0.17637, 0.15799, 0.17481, 0.066222, 0.071319, 0.07  
0752, 0.074868, 0.071321, 0.070894, 0.071692, 0.071586, 0.069091, 0.069943, 0.  
068917, 0.070471, 0.070576, 0.071085, 0.065649, 0.070879, 0.070516, 0.070624,  
0.37283, 0.37784, 0.37108, 0.38298, 0.37347, 0.36718, 0.36036, 0.21537, 0.2020  
4, 0.22057, 0.20081, 0.19209, 0.16752, 0.18291, 0.18016, 0.17508, 0.1728, 0.161  
, 0.15266, 0.17374, 0.069954, 0.07132, 0.073809, 0.070753, 0.069842, 0.07345, 0  
.066333, 0.070194, 0.071822, 0.071223, 0.06994, 0.070068, 0.070904, 0.07445, 0  
.070905, 0.073038, 0.070629, 0.066158, 0.36651, 0.36661, 0.36676, 0.36602, 0.3  
7409, 0.37292, 0.20461, 0.21788, 0.23502, 0.25969, 0.1673, 0.17561, 0.15007, 0.  
12605, 0.18134, 0.19196, 0.1744, 0.14633, 0.17232, 0.1558, 0.072183, 0.069742,  
0.070319, 0.070205, 0.072097, 0.071681, 0.069424, 0.07069, 0.071463, 0.070427  
, 0.06933, 0.069862, 0.070239, 0.072681, 0.070623, 0.068002, 0.066281, 0.07115  
, 0.37212, 0.36916, 0.36843, 0.36898, 0.36859, 0.20263, 0.19321, 0.22115, 0.215  
76, 0.2074, 0.17553, 0.16058, 0.18563, 0.1887, 0.14905, 0.16445, 0.17446, 0.198  
75, 0.18115, 0.18114, 0.072281, 0.07149, 0.067135, 0.066722, 0.070678, 0.06893  
3, 0.070894, 0.071022, 0.07008, 0.070648, 0.071528, 0.070734, 0.070784, 0.0683  
98, 0.072206, 0.068647, 0.06991, 0.071019, 0.3661, 0.37262, 0.36873, 0.18011, 0  
.22813, 0.24066, 0.19836, 0.23121, 0.213, 0.21551, 0.23269, 0.17899, 0.17053, 0  
.17578, 0.12767, 0.17321, 0.16347, 0.1742, 0.19679, 0.16558, 0.072022, 0.07067  
3, 0.069907, 0.072386, 0.070313, 0.069569, 0.071607, 0.070207, 0.069659, 0.070  
573, 0.070363, 0.072955, 0.070541, 0.070902, 0.070397, 0.070734, 0.070513, 0.0  
72265, 0.3764, 0.176, 0.19741, 0.18163, 0.19907, 0.21691, 0.21846, 0.19582, 0.2  
12, 0.21683, 0.16949, 0.13911, 0.17554, 0.16462, 0.16387, 0.15647, 0.14693, 0.1  
7909, 0.17103, 0.07041, 0.072733, 0.071743, 0.070365, 0.070097, 0.071105, 0.06

9345,0.069234,0.073169,0.069634,0.068407,0.071212,0.071486,0.07453,0.071178,0.072016,0.072253,0.057298,0.20592,0.21412,0.1854,0.2147,0.21754,0.19948,0.22621,0.18017,0.21508,0.21792,0.15869,0.15958,0.17931,0.19107,0.17446,0.13395,0.19275,0.18396,0.17335,0.070368,0.067766,0.069014,0.069819,0.071021,0.070488,0.07302,0.070621,0.071182,0.070127,0.069015,0.071113,0.07013,0.067982,0.070138,0.071521,0.068964,0.057795,0.21732,0.21623,0.19291,0.23746,0.17411,0.2069,0.21411,0.26455,0.22487,0.20571,0.17121,0.16881,0.15703,0.14725,0.16992,0.17432,0.15931,0.16449,0.070433,0.070607,0.07121,0.070193,0.072491,0.070507,0.07179,0.070921,0.071268,0.069955,0.070878,0.070779,0.070378,0.070846,0.070968,0.067826,0.068011,0.070519,0.057705,0.20628,0.18474,0.21559,0.2078,0.21031,0.22445,0.16825,0.23276,0.2059,0.21462,0.17706,0.1716,0.18323,0.18468,0.1897,0.18951,0.17605,0.1697,0.070811,0.06957,0.077273,0.070328,0.072921,0.070558,0.065988,0.072719,0.072625,0.072375,0.069601,0.073076,0.0682,0.070503,0.073627,0.070412,0.070658,0.057919,0.058167,0.056795,0.21936,0.21066,0.17443,0.21001,0.21383,0.21329,0.20912,0.23607,0.21196,0.17231,0.16776,0.14701,0.16963,0.17048,0.18208,0.071148,0.071027,0.071945,0.068758,0.071866,0.069914,0.071702,0.070258,0.073551,0.070804,0.066949,0.07086,0.070266,0.070706,0.070672,0.07364,0.07066,0.070529,0.056829,0.057201,0.05637,0.058057,0.21741,0.19875,0.2154,0.19662,0.20889,0.23642,0.22795,0.21402,0.14203,0.1715,0.16305,0.16026,0.068087,0.072158,0.070384,0.073426,0.070718,0.070189,0.070382,0.070782,0.072086,0.067569,0.067172,0.071247,0.069958,0.071262,0.071491,0.070745,0.06637,0.070371,0.071773,0.071001,0.055685,0.057529,0.056306,0.05728,0.058182,0.057163,0.26801,0.19591,0.21441,0.21564,0.21146,0.24833,0.18639,0.26228,0.067462,0.07149,0.070139,0.071184,0.071161,0.071398,0.068979,0.070968,0.070192,0.072726,0.06909,0.07025,0.070947,0.070463,0.06815,0.070558,0.069168,0.070591,0.06913,0.072272,0.076931,0.071216,0.070569,0.056454,0.05728,0.057089,0.057655,0.057787,0.057703,0.20794,0.21881,0.23288,0.21952,0.21215,0.057786,0.057136,0.070371,0.07285,0.071308,0.071923,0.072289,0.070449,0.072108,0.067778,0.072147,0.069406,0.070138,0.070742,0.068197,0.069986,0.069266,0.069733,0.072689,0.069912,0.070377,0.070651,0.071069,0.057479,0.057936,0.056497,0.057319,0.056923,0.057848,0.057779,0.05718,0.057956,0.05792,0.21435,0.22395,0.057585,0.057928,0.055273,0.057913,0.070551,0.070384,0.07107,0.071189,0.070192,0.070823,0.070383,0.068948,0.069914,0.071186,0.068838,0.069843,0.069868,0.072972,0.070883,0.07039,0.067462,0.071168,0.0704,0.057555,0.057756,0.056876,0.057328,0.057015,0.05747,0.057404,0.056971,0.056944,0.057807,0.056739,0.057517,0.056696,0.057075,0.058168,0.056858,0.057519,0.070997,0.070493,0.070902,0.073959,0.071712,0.070741,0.070871,0.070185,0.068824,0.069168,0.071687,0.070631,0.071024,0.072579,0.07123,0.064162,0.05741,0.057201,0.057191,0.056937,0.058426,0.057068,0.057023,0.056774,0.0576,0.057504,0.057597,0.056962,0.057785,0.055954,0.055259,0.056676,0.058135,0.056723,0.057689,0.06833,0.069451,0.070181,0.072126,0.070727,0.070848,0.072631,0.067342,0.068862,0.069229,0.072655,0.070863,0.069342,0.057223,0.056533,0.057037,0.057495,0.056949,0.057074,0.057536,0.056395,0.057191,0.057144,0.05774,0.056481,0.05695,0.057459,0.056571,0.056848,0.057195,0.057615,0.057951,0.056204,0.056752,0.072009,0.072505,0.069329,0.069412,0.070751,0.066316,0.069946,0.067456,0.071094,0.057131,0.057436,0.057287,0.056383,0.057633,0.05705,0.057456,0.057847,0.05747,0.057564,0.058264,0.057778,0.056676,0.057609,0.058793,0.056898,0.055735,0.05667,0.057391,0.058156,0.055935,0.057225,0.057053,0.056503,0.058123,0.067372,0.072685,

0.071321,0.070474,0.057304,0.05658,0.057969,0.056655,0.05725,0.057597,  
0.058076,0.057458,0.057542,0.057518,0.057855,0.057696,0.057578,0.05704  
3,0.057036,0.057823,0.057593,0.057685,0.056928,0.056716,0.057553,0.056  
89,0.058033,0.058064,0.057058,0.056808,0.057967,0.05733,0.057595,0.057  
593,0.058328,0.056191,0.057027,0.056877,0.057353,0.057192,0.05714,0.05  
6838,0.05795,0.057867,0.056388,0.057595,0.057514,0.057732,0.056877,0.0  
56877,0.057816,0.059205,0.058204,0.058576,0.057329,0.056875,0.056909,0  
.057153,0.056952,0.056732,0.057359,0.057805,0.057089,0.056878,0.058254  
,0.058022,0.058318,0.057446,0.055761,0.057155,0.057196,0.058082,0.0578  
37,0.057631,0.057138,0.058002,0.056688,0.057824,0.058424,0.056599,0.05  
727,0.057073,0.057794,0.056963,0.057584,0.056814,0.05696,0.056443,0.05  
706,0.057692,0.056686,0.056823,0.057535,0.058278,0.056876,0.057135,0.0  
56243,0.05765,0.057229,0.057464,0.057579,0.0569,0.058148,0.056798,0.05  
7559,0.056879,0.057842,0.056218,0.057315,0.056844,0.058168,0.057961,0.  
057178,0.057046,0.05806,0.057541,0.057965,0.057836,0.058016,0.057208,0  
.056688,0.056776,0.057992,0.057421,0.058295,0.057613,0.057497,0.057806  
,0.058163,0.05687,0.056526,0.056796,0.056261,0.056981,0.056767,0.05760  
2,0.057364,0.058323,0.057333,0.056837,0.058014,0.057844,0.056577,0.056  
494,0.057846,0.056864,0.057576,0.057325,0.058139,0.05824,0.058267,0.05  
7526,0.056248,0.056675,0.05682,0.057182,0.057385,0.057341,0.056481,0.0  
56893,0.056438,0.057376,0.057696,0.058122,0.056939,0.057083,0.057331,0  
.058045,0.057083,0.057464,0.056762,0.057246,0.057456,0.056746,0.056208  
,0.057212,0.058155,0.057317,0.057208,0.057563,0.056456,0.05779,0.05719  
9,0.057396,0.057067,0.057509,0.056029,0.057831,0.057216,0.056838,0.057  
697,0.058096,0.058591,0.0573,0.058283,0.058094,0.056228,0.057625,0.058  
027

0.080199,0.080635,0.080302,0.080029,0.080847,0.079616,0.080932,0.08022  
8,0.079731,0.080618,0.080247,0.080633,0.080127,0.079489,0.080406,0.080  
438,0.081639,0.080805,0.080759,0.079685,0.20723,0.21967,0.2387,0.1826,  
0.080074,0.080331,0.080235,0.08051,0.079693,0.080469,0.081389,0.081093  
,0.08099,0.07989,0.080949,0.079887,0.08044,0.080826,0.080689,0.35865,0  
.21906,0.22769,0.21761,0.21976,0.22778,0.24346,0.08016,0.079876,0.0812  
31,0.080621,0.081386,0.08062,0.080369,0.080608,0.080207,0.079641,0.080  
538,0.080476,0.08086,0.080347,0.080842,0.36427,0.36364,0.20386,0.25496  
,0.22758,0.22611,0.23785,0.23859,0.23098,0.21914,0.079405,0.079575,0.0  
80403,0.080865,0.079951,0.0803,0.080494,0.079594,0.080212,0.080677,0.0  
80392,0.081466,0.080613,0.081371,0.080158,0.36627,0.36748,0.35958,0.21  
153,0.1995,0.2253,0.22096,0.21842,0.22584,0.22157,0.19212,0.24275,0.07  
9777,0.080504,0.080819,0.079961,0.080342,0.080428,0.080471,0.080486,0.  
080838,0.081234,0.07978,0.080441,0.080229,0.080617,0.07988,0.081123,0.  
37007,0.36613,0.36391,0.3655,0.20509,0.23495,0.2579,0.2243,0.22046,0.2  
2034,0.21264,0.2266,0.18593,0.224,0.080419,0.080368,0.080769,0.080269,  
0.080782,0.080399,0.079941,0.07999,0.080247,0.080528,0.081214,0.080768  
,0.080173,0.079978,0.080181,0.081432,0.37014,0.3733,0.36113,0.36434,0.  
36522,0.36969,0.20454,0.22391,0.23129,0.21191,0.23463,0.22792,0.21829,  
0.22418,0.24834,0.22222,0.080299,0.080173,0.081179,0.079766,0.080408,0  
.080432,0.08043,0.080515,0.080011,0.080024,0.080069,0.080756,0.080723,  
0.080376,0.080562,0.080783,0.080504,0.37683,0.37206,0.35977,0.3687,0.3  
7105,0.37249,0.21042,0.24843,0.24012,0.22133,0.21653,0.21921,0.23104,0  
.26323,0.22156,0.22705,0.22332,0.080887,0.08024,0.080813,0.08002,0.080  
509,0.080652,0.07966,0.079667,0.079771,0.08049,0.080812,0.080652,0.080  
354,0.068843,0.068522,0.06877,0.080824,0.35684,0.36683,0.36274,0.36711

,0.36398,0.37041,0.3594,0.22208,0.23084,0.22524,0.23735,0.21107,0.21601,0.23041,0.16544,0.21455,0.22557,0.21547,0.079763,0.079924,0.080289,0.08028,0.080469,0.080332,0.081055,0.079916,0.080036,0.080278,0.079502,0.066319,0.068197,0.06947,0.066727,0.067874,0.067667,0.07959,0.3671,0.35513,0.36423,0.3641,0.36424,0.3604,0.38204,0.21276,0.245,0.20642,0.24098,0.22293,0.22322,0.22518,0.2231,0.21512,0.21979,0.20072,0.079913,0.07993,0.079644,0.08029,0.080707,0.079615,0.080541,0.081412,0.079778,0.068498,0.068545,0.070604,0.071863,0.070092,0.068062,0.067318,0.067672,0.069079,0.080851,0.34857,0.36054,0.35384,0.36517,0.36928,0.35703,0.37412,0.21671,0.23048,0.21598,0.22393,0.22514,0.23194,0.22356,0.22779,0.22958,0.21927,0.22432,0.21278,0.079559,0.080121,0.080248,0.081119,0.080947,0.081049,0.06576,0.06712,0.067894,0.068449,0.069155,0.069748,0.068531,0.066204,0.068319,0.066633,0.070723,0.068974,0.36348,0.37368,0.36861,0.36833,0.37478,0.36994,0.36807,0.22223,0.21454,0.2274,0.22224,0.21649,0.21377,0.22493,0.268,0.20231,0.2195,0.22689,0.21317,0.081001,0.081325,0.079522,0.069726,0.067745,0.068389,0.06821,0.06933,0.068572,0.068338,0.069908,0.06777,0.068618,0.073061,0.06924,0.069433,0.066882,0.068476,0.36331,0.36704,0.36476,0.36191,0.36787,0.36637,0.36497,0.35794,0.37072,0.2397,0.2207,0.22583,0.20928,0.18586,0.22564,0.2421,0.24056,0.16344,0.20661,0.22943,0.067767,0.067743,0.06849,0.06793,0.068145,0.069534,0.069249,0.068365,0.065405,0.069057,0.069091,0.069999,0.067441,0.068613,0.069829,0.069957,0.06839,0.068989,0.37044,0.36891,0.36413,0.36267,0.35869,0.36499,0.3735,0.3739,0.36725,0.21164,0.22176,0.1725,0.19431,0.14148,0.17372,0.17049,0.15901,0.17453,0.16855,0.16974,0.067609,0.069431,0.068155,0.070302,0.067959,0.067953,0.065801,0.067733,0.068854,0.066496,0.068345,0.069356,0.069484,0.067031,0.068182,0.0678,0.068107,0.068769,0.37293,0.36399,0.36676,0.35991,0.36959,0.36268,0.37214,0.36015,0.359,0.21612,0.16375,0.14555,0.16376,0.17807,0.15869,0.17106,0.15913,0.17301,0.15522,0.17217,0.064038,0.069223,0.068127,0.072308,0.069069,0.068649,0.069366,0.069323,0.066757,0.067715,0.066934,0.068241,0.068406,0.069093,0.063866,0.06839,0.068404,0.068431,0.37232,0.36926,0.36886,0.38013,0.36991,0.36215,0.35555,0.21162,0.19968,0.22015,0.19794,0.18898,0.1659,0.18099,0.17817,0.17205,0.1695,0.15772,0.14968,0.17201,0.067786,0.068651,0.071308,0.068635,0.067556,0.070981,0.064986,0.067944,0.06951,0.068681,0.067527,0.067966,0.068728,0.071936,0.068915,0.07038,0.068368,0.06454,0.36569,0.36939,0.36108,0.3669,0.3718,0.36646,0.20061,0.21585,0.23579,0.26087,0.16376,0.17309,0.14864,0.12351,0.17909,0.18705,0.17112,0.14378,0.16979,0.15185,0.069908,0.067502,0.067987,0.067887,0.069845,0.069005,0.067583,0.068398,0.069562,0.068231,0.067333,0.067921,0.067454,0.07043,0.068151,0.065949,0.064207,0.068728,0.37092,0.36827,0.36503,0.36772,0.36681,0.19955,0.19238,0.21902,0.21525,0.20667,0.17467,0.1578,0.18227,0.18495,0.14481,0.16004,0.17138,0.19724,0.17832,0.17779,0.070198,0.069112,0.065184,0.064787,0.068345,0.066923,0.069117,0.06891,0.067462,0.068567,0.069,0.068434,0.06866,0.0666,0.069974,0.066348,0.067698,0.06897,0.36191,0.36921,0.36143,0.17704,0.22802,0.23713,0.19797,0.22805,0.20953,0.21376,0.23056,0.17624,0.1677,0.17492,0.12487,0.17076,0.16122,0.17204,0.19319,0.1631,0.069629,0.06865,0.067624,0.069599,0.06828,0.067414,0.068981,0.067765,0.067564,0.06843,0.068048,0.070491,0.068273,0.06857,0.068071,0.068239,0.068005,0.070118,0.37497,0.17385,0.19332,0.18012,0.19759,0.21336,0.21663,0.19323,0.20958,0.21542,0.16672,0.13761,0.17341,0.16084,0.15879,0.15277,0.1444,0.17556,0.16813,0.068237,0.069826,0.069369,0.068429,0.067875,0.068943,0.067207,0.067281,0.07

0555,0.067549,0.066151,0.069292,0.068764,0.072138,0.068991,0.069424,0.069593,0.056324,0.20437,0.21122,0.18383,0.21206,0.21587,0.19733,0.21995,0.17687,0.2126,0.21546,0.1552,0.15634,0.17597,0.18874,0.17279,0.13145,0.18912,0.18061,0.17103,0.067885,0.065783,0.066635,0.067571,0.068744,0.068164,0.070268,0.068523,0.068861,0.067949,0.066858,0.069045,0.068089,0.066032,0.068006,0.069161,0.067698,0.056503,0.21425,0.21556,0.19136,0.23294,0.17377,0.20305,0.21369,0.26196,0.22467,0.20498,0.16743,0.16668,0.1538,0.14513,0.16685,0.17144,0.15604,0.16331,0.06835,0.068608,0.069437,0.067951,0.070059,0.068135,0.069564,0.068278,0.069022,0.067807,0.068625,0.068593,0.067788,0.068738,0.069092,0.06585,0.065888,0.068302,0.056971,0.20321,0.18265,0.21358,0.20628,0.20873,0.21913,0.16771,0.22805,0.20579,0.21253,0.17399,0.1696,0.18165,0.18112,0.1873,0.18628,0.17241,0.16694,0.068824,0.067469,0.074094,0.068207,0.070461,0.068281,0.063959,0.070211,0.070583,0.070236,0.067599,0.070462,0.066822,0.068263,0.070975,0.068411,0.068335,0.057031,0.057065,0.056005,0.21804,0.20856,0.17349,0.20685,0.21155,0.21292,0.20559,0.23265,0.21116,0.16865,0.16512,0.14486,0.16839,0.16877,0.17922,0.068774,0.068721,0.069389,0.066428,0.06943,0.067563,0.069323,0.067674,0.07076,0.068536,0.065071,0.068462,0.06797,0.06854,0.06814,0.071236,0.068418,0.068147,0.055479,0.056232,0.056346,0.057273,0.21521,0.19635,0.21288,0.19548,0.208,0.23426,0.22624,0.21301,0.1396,0.16931,0.16035,0.1579,0.065931,0.069598,0.068466,0.07114,0.068821,0.067805,0.06847,0.068293,0.069933,0.06513,0.065156,0.068987,0.067425,0.068957,0.069029,0.068706,0.064453,0.068041,0.069295,0.068676,0.054937,0.056865,0.055446,0.056122,0.056614,0.056018,0.26274,0.19282,0.2131,0.21579,0.20945,0.24597,0.18469,0.26004,0.065703,0.069235,0.067926,0.069591,0.0688,0.069201,0.066845,0.068257,0.067872,0.07005,0.067308,0.0679,0.068468,0.068275,0.066333,0.068259,0.067323,0.068226,0.06681,0.070029,0.074433,0.068895,0.06812,0.055186,0.056234,0.056313,0.056973,0.057141,0.056951,0.20656,0.21459,0.22915,0.21794,0.21018,0.057188,0.055791,0.068489,0.07057,0.068978,0.069835,0.070274,0.068072,0.070087,0.06585,0.06933,0.067534,0.067889,0.068253,0.065787,0.067766,0.067547,0.067294,0.069967,0.068108,0.068506,0.068275,0.068745,0.056331,0.057082,0.055877,0.056306,0.056182,0.05688,0.056619,0.056299,0.056494,0.056323,0.20934,0.22289,0.056838,0.056657,0.05458,0.056866,0.068601,0.068333,0.068738,0.068924,0.067939,0.068648,0.068343,0.067057,0.067656,0.069172,0.066937,0.067589,0.068093,0.070879,0.068832,0.06781,0.065581,0.068975,0.068241,0.056716,0.056578,0.056097,0.05661,0.055806,0.056163,0.05639,0.056247,0.055795,0.056627,0.055822,0.055837,0.055914,0.056417,0.057257,0.056474,0.056361,0.068622,0.068124,0.068914,0.071256,0.069582,0.068472,0.068652,0.068176,0.066643,0.066944,0.06925,0.068392,0.069257,0.070206,0.068673,0.062767,0.056331,0.056501,0.056488,0.055757,0.056918,0.056277,0.056572,0.055519,0.056505,0.056659,0.056881,0.05639,0.05692,0.055068,0.054545,0.055295,0.056775,0.055717,0.056464,0.066491,0.067016,0.067525,0.069679,0.068615,0.068895,0.07024,0.065446,0.066827,0.066985,0.070121,0.068613,0.067336,0.056139,0.055878,0.05605,0.056298,0.055849,0.056417,0.0566,0.055943,0.056269,0.055981,0.057203,0.055332,0.056213,0.056815,0.055939,0.055473,0.056645,0.056534,0.056675,0.055412,0.05586,0.069556,0.070044,0.06704,0.067663,0.068141,0.065085,0.067524,0.065732,0.068819,0.056146,0.056655,0.05605,0.055436,0.057015,0.055782,0.056898,0.056829,0.056266,0.056264,0.057043,0.056656,0.056035,0.05623,0.057619,0.056132,0.054961,0.055775,0.056557,0.05725,0.055115,0.055673,0.056021,0.055366,0.057112,0.065598,0.070319,0.069542,0.06836

,0.056755,0.05545,0.057123,0.055939,0.056591,0.056231,0.056798,0.05652  
,0.056798,0.056383,0.056608,0.056734,0.056451,0.056285,0.05608,0.05636  
2,0.056309,0.056947,0.05605,0.055566,0.056483,0.055538,0.057199,0.0572  
74,0.055748,0.056058,0.057344,0.056792,0.05667,0.056599,0.056977,0.055  
343,0.056055,0.056056,0.05629,0.056054,0.05631,0.056638,0.056537,0.056  
984,0.055368,0.056625,0.056608,0.056715,0.055898,0.055669,0.056491,0.0  
58339,0.05761,0.057747,0.056704,0.056128,0.055846,0.056558,0.055884,0.  
055843,0.056118,0.056418,0.056247,0.05565,0.057526,0.057223,0.057167,0  
.056403,0.054836,0.056182,0.055683,0.057041,0.05661,0.057146,0.05647,0  
.057084,0.055597,0.056451,0.057609,0.055513,0.056491,0.055944,0.056501  
,0.056176,0.056257,0.05544,0.056225,0.055117,0.056406,0.056265,0.05556  
3,0.055548,0.05649,0.056987,0.055887,0.056214,0.055302,0.056819,0.0566  
45,0.056583,0.05629,0.05601,0.05696,0.056048,0.0566,0.055905,0.057164,  
0.055646,0.056101,0.055781,0.056903,0.056873,0.056262,0.056213,0.05721  
7,0.056043,0.056356,0.056432,0.05681,0.056647,0.056101,0.055977,0.0569  
,0.0566,0.057542,0.05667,0.05681,0.056751,0.056994,0.05566,0.055672,0.  
055521,0.055779,0.056187,0.055628,0.057038,0.056259,0.057306,0.056617,  
0.055688,0.056901,0.057071,0.055527,0.055373,0.057018,0.055942,0.05668  
7,0.056289,0.056986,0.05721,0.057609,0.056583,0.055296,0.055493,0.0556  
05,0.056026,0.056129,0.056742,0.055319,0.055565,0.055082,0.056574,0.05  
6965,0.056803,0.056292,0.056395,0.056585,0.05739,0.056233,0.056547,0.0  
56207,0.056355,0.056852,0.056217,0.055449,0.055887,0.057029,0.056602,0  
.055986,0.056778,0.055416,0.056247,0.056111,0.056936,0.056065,0.056383  
,0.055271,0.056621,0.056184,0.055538,0.056856,0.057445,0.0574,0.056304  
,0.056972,0.057312,0.05537,0.05674,0.056739  
0.077289,0.078062,0.078018,0.077215,0.077839,0.077433,0.078005,0.07795  
9,0.076982,0.077788,0.077755,0.077934,0.077369,0.076963,0.078013,0.077  
79,0.078586,0.077847,0.078157,0.077347,0.20408,0.21606,0.23498,0.17972  
,0.077234,0.077707,0.077602,0.07775,0.077115,0.07777,0.078305,0.078514  
,0.078035,0.077167,0.078471,0.077273,0.077859,0.078116,0.077963,0.3512  
6,0.21607,0.22493,0.21359,0.21656,0.22515,0.23986,0.077687,0.076884,0.  
078377,0.077963,0.078345,0.07788,0.077825,0.078135,0.077553,0.076933,0  
.077938,0.077794,0.077781,0.077647,0.07798,0.36224,0.36081,0.19867,0.2  
5436,0.22355,0.22263,0.23301,0.23456,0.22743,0.21513,0.076877,0.076811  
,0.077748,0.078168,0.077578,0.077782,0.077786,0.077003,0.077571,0.0778  
1,0.077677,0.078511,0.077862,0.078421,0.077229,0.362,0.36169,0.35816,0  
.20888,0.19627,0.22383,0.21826,0.21717,0.22333,0.21842,0.19093,0.24235  
,0.077109,0.077741,0.078058,0.077371,0.077961,0.077766,0.077739,0.0775  
3,0.077883,0.078713,0.077241,0.077548,0.077307,0.07781,0.077045,0.0782  
79,0.3654,0.36339,0.36014,0.36509,0.20013,0.23185,0.2582,0.22161,0.218  
17,0.21802,0.21012,0.22482,0.18315,0.22111,0.077783,0.077708,0.077856,  
0.077656,0.07801,0.077773,0.07718,0.077355,0.077792,0.077785,0.078256,  
0.078059,0.077798,0.077337,0.077693,0.078316,0.37068,0.37329,0.3567,0.  
35794,0.36325,0.36669,0.2018,0.21821,0.22996,0.20905,0.23233,0.22597,0  
.21489,0.22011,0.24835,0.22112,0.077608,0.077628,0.078206,0.07753,0.07  
7585,0.077448,0.077382,0.077538,0.077437,0.077205,0.077399,0.078034,0.  
078042,0.077461,0.077957,0.07758,0.077661,0.37257,0.36658,0.35459,0.36  
791,0.36922,0.36474,0.20799,0.24239,0.23738,0.21611,0.21352,0.21605,0.  
22739,0.26209,0.21709,0.22287,0.22085,0.07813,0.077796,0.078227,0.0772  
74,0.077424,0.07792,0.077065,0.076616,0.07694,0.077904,0.078032,0.0779  
4,0.077514,0.067069,0.067092,0.066962,0.078249,0.35282,0.36391,0.36262  
,0.36684,0.36409,0.3633,0.3564,0.21693,0.2269,0.22449,0.23391,0.20728,



0.21192,0.22729,0.16307,0.21212,0.22156,0.21464,0.077195,0.077139,0.077345,0.077503,0.077491,0.077724,0.078286,0.077156,0.077284,0.077672,0.077002,0.064628,0.066415,0.067232,0.065547,0.066299,0.066212,0.076933,0.36221,0.35198,0.35999,0.36126,0.36238,0.36085,0.37921,0.20992,0.24073,0.20248,0.23559,0.22134,0.21996,0.2215,0.21774,0.2131,0.21436,0.19803,0.077186,0.07714,0.077137,0.077776,0.077763,0.077203,0.077678,0.078579,0.077122,0.066712,0.066761,0.068749,0.069997,0.06801,0.066391,0.065354,0.066151,0.06717,0.078219,0.34648,0.35964,0.35471,0.36296,0.36425,0.352,0.36943,0.21552,0.22629,0.21383,0.22003,0.22023,0.22644,0.2213,0.22533,0.22488,0.21763,0.22134,0.21058,0.077226,0.077091,0.077308,0.078268,0.078272,0.078476,0.064147,0.065453,0.065989,0.066935,0.067819,0.067796,0.066941,0.064374,0.0663,0.065136,0.068766,0.067461,0.36057,0.37142,0.36239,0.36563,0.3711,0.36539,0.36181,0.22017,0.21246,0.22281,0.21755,0.21472,0.21087,0.22342,0.26256,0.19801,0.21745,0.22277,0.21082,0.078091,0.078651,0.077075,0.067711,0.066148,0.066744,0.066366,0.067681,0.066674,0.066944,0.06806,0.066345,0.066335,0.070695,0.067384,0.067692,0.065538,0.066882,0.35861,0.36606,0.36088,0.3592,0.36571,0.36101,0.36485,0.35502,0.3669,0.23693,0.21672,0.22434,0.20701,0.18372,0.22213,0.23781,0.24069,0.16212,0.20333,0.22623,0.066293,0.066552,0.066713,0.066355,0.066284,0.067532,0.067208,0.06634,0.063839,0.067471,0.067439,0.068109,0.065643,0.067142,0.068233,0.068243,0.066435,0.067575,0.37261,0.36472,0.36084,0.35906,0.35763,0.36126,0.36575,0.36926,0.36735,0.20897,0.21824,0.17006,0.18912,0.13969,0.17161,0.16888,0.15502,0.17167,0.16705,0.16744,0.066179,0.067816,0.066161,0.068544,0.066493,0.066665,0.064379,0.066337,0.067024,0.064946,0.066299,0.067927,0.067605,0.06513,0.06609,0.065915,0.066658,0.067116,0.36508,0.36377,0.36395,0.35646,0.3673,0.35934,0.3687,0.35898,0.35761,0.21505,0.1596,0.1432,0.16169,0.17685,0.15584,0.16766,0.15558,0.1719,0.15214,0.17217,0.062624,0.067503,0.066674,0.07031,0.067402,0.066613,0.067468,0.067475,0.065152,0.066377,0.065107,0.066626,0.066795,0.067537,0.062912,0.066829,0.066909,0.066792,0.37142,0.3662,0.36049,0.37736,0.36136,0.35843,0.35655,0.2096,0.19776,0.21802,0.19483,0.18832,0.16472,0.17764,0.1771,0.16911,0.16631,0.15619,0.14925,0.1686,0.066176,0.067137,0.069009,0.066856,0.065693,0.068866,0.063621,0.066519,0.067804,0.067084,0.065874,0.066392,0.06729,0.069991,0.067001,0.068125,0.066684,0.063035,0.36414,0.36518,0.35616,0.36341,0.37022,0.36738,0.19861,0.21203,0.23202,0.25732,0.16308,0.16995,0.14496,0.12186,0.17774,0.18567,0.17013,0.14421,0.16812,0.15042,0.068472,0.06611,0.066768,0.066459,0.068047,0.067384,0.065559,0.066557,0.067656,0.066556,0.065761,0.066086,0.065869,0.068605,0.066364,0.064224,0.063017,0.067,0.37002,0.36724,0.36066,0.36746,0.36166,0.19714,0.19179,0.21603,0.21257,0.20301,0.17303,0.15567,0.18098,0.18152,0.14292,0.15767,0.16799,0.19329,0.17669,0.17422,0.067962,0.0675,0.063889,0.063478,0.066649,0.065018,0.067361,0.066512,0.065469,0.067192,0.066826,0.066819,0.066819,0.064919,0.068073,0.064598,0.065994,0.067132,0.35838,0.36595,0.36207,0.17777,0.22359,0.23666,0.19688,0.22445,0.20688,0.21152,0.22828,0.17329,0.16461,0.1732,0.12223,0.16877,0.16055,0.16943,0.19088,0.16247,0.068015,0.06678,0.066208,0.067497,0.066481,0.065869,0.06746,0.066347,0.065814,0.06653,0.066325,0.068381,0.066453,0.066432,0.066383,0.066732,0.06657,0.068442,0.37356,0.17238,0.193,0.17836,0.19428,0.20998,0.21378,0.19015,0.20736,0.2115,0.16553,0.13498,0.17185,0.15958,0.15569,0.15,0.14184,0.17403,0.16663,0.066548,0.068386,0.067792,0.066488,0.066443,0.067063,0.06581,0.065845,0.06855,0.065724,0.064815,0.067889,0.067119,0.07013,0.

067137,0.067793,0.067595,0.055539,0.2032,0.20759,0.1811,0.2075,0.21301  
,0.19602,0.21588,0.1762,0.20981,0.2128,0.15393,0.15465,0.17403,0.18615  
,0.1722,0.12916,0.18642,0.17735,0.16719,0.066455,0.064132,0.065023,0.0  
65691,0.067155,0.066064,0.068613,0.066927,0.067094,0.066866,0.065047,0  
.066942,0.066612,0.064367,0.066424,0.067606,0.066039,0.055493,0.21285,  
0.2141,0.19175,0.22879,0.17044,0.2021,0.21162,0.26142,0.2211,0.20369,0  
.16661,0.1655,0.15269,0.14315,0.16562,0.16966,0.15286,0.16159,0.066894  
,0.067426,0.067628,0.066249,0.067865,0.06619,0.06784,0.066667,0.067319  
,0.066021,0.067362,0.066857,0.065928,0.066649,0.067356,0.064448,0.0643  
87,0.06608,0.056267,0.20067,0.18215,0.21205,0.20541,0.20857,0.21633,0.  
16564,0.22739,0.20428,0.21085,0.17144,0.16559,0.17962,0.18009,0.18489,  
0.18509,0.17074,0.16588,0.066895,0.065622,0.072063,0.066042,0.068565,0  
.066164,0.062376,0.068325,0.068427,0.068189,0.065721,0.068733,0.065193  
,0.066428,0.068673,0.066667,0.066651,0.056281,0.056161,0.055285,0.2155  
7,0.20577,0.17235,0.20507,0.20934,0.20994,0.20299,0.23032,0.20986,0.16  
566,0.16345,0.14241,0.16636,0.16535,0.17705,0.066654,0.067428,0.067524  
,0.064864,0.067546,0.065588,0.067645,0.065723,0.069001,0.066857,0.0637  
26,0.066608,0.066371,0.06687,0.066129,0.069025,0.067521,0.066517,0.054  
96,0.055277,0.055639,0.056408,0.21242,0.19183,0.20929,0.19429,0.20606,  
0.23358,0.22577,0.21094,0.14062,0.16761,0.15724,0.15521,0.06455,0.0677  
38,0.067081,0.069463,0.067097,0.066127,0.066688,0.066755,0.067531,0.06  
37,0.0638,0.06726,0.065886,0.067472,0.067275,0.066814,0.062663,0.06623  
,0.067685,0.066801,0.054322,0.056221,0.054604,0.055735,0.055507,0.0557  
67,0.26138,0.19162,0.21037,0.21435,0.20757,0.24541,0.18278,0.26071,0.0  
64547,0.067447,0.066158,0.067679,0.067475,0.067311,0.065287,0.066462,0  
.066033,0.068334,0.065744,0.066533,0.066479,0.066657,0.064823,0.066253  
,0.065625,0.066277,0.065222,0.067999,0.072535,0.067028,0.066526,0.0546  
06,0.0556,0.0557,0.056312,0.056343,0.056188,0.20369,0.21292,0.22803,0.  
21682,0.20752,0.056569,0.054854,0.066434,0.068519,0.067017,0.067675,0.  
06821,0.066533,0.068218,0.064464,0.067352,0.066277,0.066275,0.066342,0  
.064466,0.065968,0.065846,0.065636,0.068124,0.06684,0.066674,0.066405,  
0.067123,0.055786,0.056208,0.054989,0.055476,0.055846,0.05591,0.055563  
,0.055421,0.055399,0.055685,0.20694,0.22093,0.056444,0.055872,0.05387,  
0.055978,0.066769,0.066829,0.06695,0.067439,0.066697,0.06704,0.066896,  
0.065446,0.065816,0.067648,0.065151,0.065928,0.066385,0.069145,0.06740  
3,0.066407,0.064148,0.067361,0.06626,0.055962,0.055811,0.055376,0.0559  
61,0.055442,0.055418,0.055368,0.055959,0.055335,0.055587,0.054959,0.05  
5309,0.055349,0.055986,0.056243,0.056187,0.055244,0.066716,0.066502,0.  
067503,0.069521,0.06729,0.066788,0.066861,0.06674,0.065104,0.06543,0.0  
67478,0.066482,0.066808,0.068188,0.066889,0.061061,0.055331,0.055814,0  
.055463,0.054636,0.055985,0.05541,0.055691,0.055149,0.056397,0.055751,  
0.055904,0.055883,0.055601,0.054344,0.053601,0.054496,0.056236,0.05524  
3,0.055744,0.065164,0.065132,0.066052,0.067733,0.066993,0.066943,0.068  
626,0.064081,0.065574,0.06534,0.068298,0.06674,0.065683,0.056004,0.055  
546,0.055122,0.055475,0.055738,0.055792,0.055692,0.055162,0.055226,0.0  
55565,0.056426,0.054682,0.05564,0.056535,0.055145,0.055193,0.055705,0.  
056136,0.055851,0.055043,0.055375,0.067823,0.067923,0.06518,0.066009,0  
.066457,0.063446,0.065856,0.064282,0.066914,0.055275,0.056275,0.055594  
,0.054835,0.05677,0.05466,0.055395,0.055819,0.055348,0.05535,0.056336,  
0.055742,0.055304,0.055508,0.056939,0.055478,0.053953,0.055263,0.05597  
4,0.056204,0.054073,0.054885,0.055095,0.054585,0.056274,0.064185,0.068  
518,0.067606,0.066985,0.055722,0.054488,0.056427,0.055154,0.056163,0.0

55369,0.055916,0.055941,0.055536,0.055825,0.055717,0.056407,0.055577,0.055688,0.055299,0.055814,0.055567,0.056095,0.055343,0.05473,0.055425,0.054912,0.056379,0.056471,0.055015,0.055463,0.05688,0.05588,0.055812,0.056107,0.056368,0.05436,0.055683,0.055233,0.055607,0.055621,0.055222,0.056006,0.056033,0.056094,0.05458,0.056002,0.056154,0.05557,0.055669,0.054499,0.055543,0.057058,0.057004,0.056599,0.055639,0.055442,0.054701,0.05601,0.055704,0.054976,0.055289,0.055923,0.0554,0.054687,0.056434,0.056302,0.056453,0.05583,0.054363,0.055028,0.055266,0.056122,0.056228,0.056607,0.056042,0.056582,0.054616,0.055771,0.056949,0.054613,0.056115,0.055204,0.055975,0.055481,0.055721,0.054558,0.0551,0.054878,0.055763,0.055422,0.054538,0.054602,0.055901,0.056053,0.055102,0.055376,0.054514,0.056172,0.056135,0.055838,0.055452,0.055604,0.055726,0.0552,0.05593,0.054958,0.056671,0.055061,0.055748,0.055219,0.056433,0.05627,0.055131,0.055555,0.056314,0.055398,0.055742,0.0562,0.055904,0.056165,0.055472,0.055155,0.056306,0.055873,0.05665,0.05577,0.055745,0.056175,0.056143,0.055273,0.055387,0.054943,0.055311,0.055014,0.055086,0.056001,0.055471,0.056318,0.0564,0.055506,0.055974,0.056292,0.05479,0.05485,0.056564,0.055588,0.055926,0.05565,0.056322,0.056408,0.056684,0.055504,0.0549,0.055186,0.054729,0.055485,0.055397,0.055964,0.054869,0.054749,0.054468,0.056311,0.056197,0.056019,0.055519,0.055883,0.055415,0.056329,0.055648,0.055393,0.055342,0.055747,0.056187,0.055145,0.054547,0.05554,0.05638,0.055917,0.055145,0.055695,0.054775,0.055328,0.055552,0.056576,0.055641,0.055951,0.054305,0.056186,0.055355,0.055221,0.056134,0.05664,0.056397,0.055723,0.056278,0.055774,0.054318,0.055965,0.056253,0.075108,0.075884,0.075492,0.075257,0.07537,0.075201,0.075828,0.075984,0.074925,0.075527,0.075434,0.07545,0.075005,0.074659,0.075795,0.075576,0.076438,0.075701,0.075718,0.075055,0.20162,0.21319,0.23046,0.1767,0.075067,0.075787,0.075642,0.075772,0.075157,0.075593,0.075475,0.076192,0.075933,0.075333,0.076387,0.075259,0.075715,0.075467,0.075614,0.35104,0.21144,0.2225,0.21376,0.21382,0.22415,0.23574,0.075204,0.074847,0.075994,0.075643,0.076044,0.075597,0.07578,0.076042,0.075276,0.074677,0.075422,0.07569,0.075987,0.075465,0.076018,0.36077,0.35987,0.19751,0.25458,0.22016,0.21978,0.22895,0.23323,0.22456,0.21424,0.074665,0.074877,0.075423,0.07604,0.075604,0.07578,0.075404,0.074684,0.075085,0.075565,0.07554,0.076271,0.075558,0.076081,0.075032,0.35786,0.35951,0.35082,0.20556,0.1943,0.22119,0.2157,0.21379,0.22196,0.21479,0.18836,0.24068,0.07498,0.075765,0.076033,0.075261,0.076012,0.075491,0.075447,0.075287,0.075916,0.076576,0.07501,0.075525,0.075079,0.075292,0.074866,0.075924,0.36282,0.35833,0.35762,0.36282,0.19886,0.22856,0.25569,0.21918,0.2136,0.21338,0.20537,0.2225,0.18083,0.21766,0.075515,0.075566,0.075489,0.075256,0.075905,0.075326,0.075164,0.07566,0.075611,0.075808,0.075912,0.075805,0.075317,0.075078,0.075202,0.076054,0.36617,0.37241,0.35311,0.35073,0.36114,0.36627,0.20076,0.21415,0.22781,0.2076,0.2305,0.22387,0.21277,0.21641,0.24551,0.21925,0.075778,0.07539,0.076118,0.075473,0.075402,0.075528,0.075148,0.075301,0.075126,0.075218,0.075092,0.075866,0.076032,0.075309,0.075805,0.07545,0.075123,0.37046,0.36306,0.35373,0.36315,0.37038,0.36274,0.20676,0.24082,0.23776,0.21212,0.21057,0.21501,0.22535,0.25811,0.21192,0.22012,0.21785,0.076076,0.075447,0.075872,0.075299,0.07529,0.075582,0.07565,0.074474,0.074767,0.075685,0.075718,0.075816,0.075602,0.066044,0.065756,0.065791,0.075966,0.35354,0.36132,0.3567,0.36122,0.35998,0.3624,0.35015,0.21377,0.22432,0.22122,0.23296,0.20569,0.20781,0.22279,0.1621,0.21102,0.21987,0.21248,0.075094,0.074889,0.07

5051,0.07551,0.075376,0.075659,0.075923,0.074956,0.07498,0.075591,0.07  
4901,0.063766,0.065016,0.065751,0.064342,0.06488,0.064438,0.074617,0.3  
5878,0.3463,0.35804,0.35561,0.35582,0.35627,0.37512,0.20699,0.2382,0.2  
0206,0.2355,0.22071,0.218,0.22071,0.21539,0.21171,0.21295,0.195,0.0750  
54,0.075244,0.074918,0.075834,0.075651,0.075239,0.075103,0.076425,0.07  
4892,0.065376,0.065586,0.067493,0.068347,0.06673,0.064766,0.064519,0.0  
64378,0.06615,0.075744,0.3455,0.35501,0.3535,0.3611,0.36127,0.35067,0.  
36438,0.21361,0.22327,0.21083,0.21963,0.21627,0.22691,0.21697,0.22451,  
0.22076,0.21621,0.21867,0.20772,0.075324,0.074972,0.075547,0.075778,0.  
076286,0.076381,0.062973,0.064086,0.064415,0.065689,0.0659,0.066556,0.  
065636,0.063151,0.065052,0.063843,0.067381,0.066289,0.3611,0.36635,0.3  
664,0.36238,0.36776,0.36344,0.35893,0.21562,0.20941,0.22105,0.21522,0.  
21305,0.20906,0.22156,0.26056,0.19165,0.2154,0.21905,0.20734,0.075752,  
0.076413,0.07473,0.066476,0.065242,0.065666,0.065109,0.066326,0.065114  
,0.065453,0.066473,0.064948,0.065061,0.069352,0.065998,0.06658,0.06389  
,0.065699,0.36088,0.35998,0.36007,0.35884,0.36297,0.35988,0.36198,0.35  
274,0.36219,0.23439,0.21377,0.22019,0.20372,0.18043,0.21962,0.2373,0.2  
398,0.15987,0.20184,0.22398,0.064933,0.065014,0.065133,0.065155,0.0651  
88,0.066103,0.065624,0.065141,0.06284,0.065955,0.066036,0.0669,0.06434  
8,0.065629,0.066699,0.067029,0.065107,0.066303,0.37013,0.36018,0.35856  
,0.3603,0.35316,0.35991,0.36631,0.36994,0.36753,0.20611,0.21621,0.1694  
,0.18762,0.13914,0.1689,0.16521,0.15284,0.16947,0.16388,0.16701,0.0647  
43,0.066142,0.064921,0.06718,0.065284,0.065696,0.062706,0.06493,0.0654  
45,0.063999,0.065149,0.066379,0.066419,0.063957,0.065067,0.064369,0.06  
5259,0.066203,0.36246,0.36354,0.36123,0.35541,0.3635,0.35689,0.36358,0  
.3547,0.35535,0.21694,0.15877,0.14158,0.16063,0.17306,0.15439,0.1653,0  
.15196,0.16931,0.15046,0.16976,0.061565,0.065745,0.065246,0.068773,0.0  
65718,0.065263,0.066057,0.066103,0.064186,0.065229,0.064299,0.065376,0  
.06568,0.0659,0.061794,0.065193,0.065518,0.065396,0.37125,0.36235,0.35  
875,0.37503,0.35791,0.354,0.3573,0.20466,0.19462,0.21504,0.19443,0.186  
45,0.16357,0.1774,0.17521,0.1668,0.16361,0.15513,0.14623,0.16729,0.065  
04,0.065692,0.067505,0.065786,0.064659,0.067219,0.062659,0.065038,0.06  
6322,0.065804,0.064542,0.064888,0.066035,0.068578,0.065303,0.066877,0.  
065506,0.061931,0.36021,0.35991,0.35128,0.3605,0.36406,0.3657,0.19873,  
0.20934,0.22932,0.25692,0.16079,0.16663,0.14357,0.11961,0.17594,0.1809  
4,0.16852,0.14268,0.16852,0.1493,0.067171,0.064953,0.065664,0.065275,0  
.066825,0.066223,0.063861,0.064842,0.066107,0.065092,0.064502,0.064818  
,0.064688,0.066978,0.065108,0.063275,0.061931,0.065657,0.36957,0.36214  
,0.35919,0.36779,0.35968,0.19522,0.19016,0.21644,0.21325,0.20142,0.172  
76,0.15449,0.17862,0.1779,0.14229,0.15697,0.16665,0.19127,0.1746,0.172  
48,0.066382,0.066093,0.062475,0.062705,0.064915,0.063578,0.066219,0.06  
53,0.064324,0.065755,0.065529,0.065438,0.06574,0.063357,0.066706,0.063  
307,0.064064,0.065332,0.35498,0.36487,0.35826,0.17515,0.22162,0.2363,0  
.19454,0.22276,0.20512,0.20819,0.22394,0.17238,0.16233,0.17205,0.12042  
,0.16664,0.15966,0.168,0.18884,0.16052,0.06682,0.065343,0.065126,0.066  
216,0.065184,0.064099,0.065781,0.065146,0.064765,0.065454,0.065083,0.0  
67005,0.065568,0.065009,0.065195,0.065883,0.065262,0.066856,0.36533,0.  
16983,0.19072,0.17686,0.19503,0.20789,0.21344,0.18684,0.20583,0.2088,0  
.1647,0.13367,0.16931,0.15783,0.15505,0.1485,0.13883,0.17145,0.16585,0  
.064922,0.066867,0.066425,0.065312,0.065245,0.065742,0.064661,0.064652  
,0.067382,0.06436,0.063747,0.066134,0.06564,0.068912,0.065817,0.066156  
,0.066438,0.054914,0.2009,0.20179,0.17964,0.20409,0.21243,0.19489,0.21

637,0.17402,0.20833,0.21144,0.1524,0.1529,0.17163,0.18503,0.17041,0.12  
739,0.18171,0.17405,0.16645,0.064701,0.063209,0.063802,0.064515,0.0656  
31,0.064546,0.066981,0.065617,0.06567,0.065275,0.064183,0.065605,0.065  
122,0.063008,0.065324,0.066149,0.064527,0.054796,0.21063,0.21386,0.192  
14,0.22659,0.16651,0.20135,0.2093,0.2589,0.21968,0.20231,0.16335,0.164  
55,0.15164,0.14193,0.16272,0.16681,0.15031,0.16034,0.06561,0.066196,0.  
066199,0.064945,0.066399,0.065561,0.0666,0.065151,0.065932,0.064902,0.  
065816,0.065631,0.064391,0.065308,0.066158,0.063227,0.063119,0.064633,  
0.055469,0.19816,0.17852,0.20928,0.20167,0.20823,0.21611,0.16417,0.227  
44,0.2036,0.21062,0.1694,0.16401,0.17829,0.17936,0.18281,0.18486,0.169  
46,0.16495,0.065519,0.064431,0.070358,0.064929,0.067059,0.065018,0.061  
275,0.066847,0.067045,0.066851,0.064271,0.067315,0.064462,0.065538,0.0  
67217,0.065249,0.065146,0.055249,0.055795,0.054935,0.21451,0.20493,0.1  
6991,0.20141,0.20946,0.20672,0.201,0.22513,0.20821,0.16346,0.1617,0.14  
129,0.1639,0.16331,0.17522,0.06508,0.065888,0.066165,0.063663,0.065801  
,0.064418,0.06622,0.064481,0.067521,0.06553,0.062864,0.065007,0.065103  
,0.065431,0.064996,0.067212,0.066087,0.06489,0.054277,0.054611,0.05485  
3,0.055642,0.2113,0.19203,0.20826,0.19482,0.20442,0.23175,0.22343,0.21  
059,0.13936,0.16519,0.15718,0.15285,0.063711,0.066679,0.065582,0.06776  
1,0.065967,0.064974,0.065503,0.065539,0.066178,0.062543,0.062548,0.065  
686,0.064865,0.065882,0.065669,0.065661,0.061584,0.06481,0.066228,0.06  
5138,0.053987,0.05549,0.054023,0.055342,0.055139,0.05529,0.25731,0.192  
11,0.20768,0.2124,0.20822,0.24305,0.18058,0.25917,0.063142,0.065865,0.  
064532,0.066122,0.065836,0.065795,0.064268,0.065281,0.064724,0.066906,  
0.064583,0.06523,0.065057,0.065313,0.063681,0.065113,0.064187,0.065041  
,0.06406,0.066914,0.070807,0.065699,0.064954,0.054103,0.054713,0.05516  
8,0.056116,0.05571,0.055646,0.20263,0.20899,0.22603,0.21357,0.20559,0.  
055782,0.054137,0.065047,0.067102,0.065785,0.066375,0.066734,0.065162,  
0.06678,0.0635,0.0657,0.065005,0.065108,0.064869,0.063349,0.064522,0.0  
64444,0.06422,0.066967,0.065503,0.065275,0.065266,0.065752,0.055006,0.  
055212,0.054482,0.055386,0.055048,0.055433,0.054981,0.055255,0.055234,  
0.055399,0.20457,0.21665,0.056017,0.055572,0.053779,0.054892,0.065941,  
0.065673,0.065546,0.065978,0.065439,0.065633,0.065185,0.063777,0.06454  
8,0.065691,0.064056,0.064835,0.065045,0.067959,0.065781,0.065796,0.062  
808,0.066027,0.065254,0.055588,0.05533,0.054257,0.055571,0.055103,0.05  
449,0.054624,0.054854,0.055123,0.054997,0.054415,0.054761,0.054564,0.0  
55152,0.055325,0.055442,0.054526,0.065196,0.065262,0.066077,0.067868,0  
.066149,0.065394,0.065476,0.065351,0.063871,0.064333,0.066075,0.065056  
,0.065503,0.066801,0.065968,0.060099,0.055237,0.055506,0.054682,0.0543  
68,0.05524,0.054752,0.055251,0.054443,0.055865,0.05473,0.055095,0.0552  
25,0.055081,0.054289,0.053242,0.054741,0.055609,0.054856,0.054655,0.06  
4049,0.06363,0.064783,0.066118,0.065552,0.065771,0.067257,0.063207,0.0  
64304,0.063815,0.066984,0.065524,0.064181,0.055905,0.055032,0.054742,0  
.055183,0.05527,0.055074,0.055003,0.054959,0.054217,0.054767,0.055674,  
0.054206,0.055286,0.055521,0.055098,0.054447,0.054842,0.055518,0.05533  
6,0.054542,0.054991,0.066796,0.066344,0.064025,0.064586,0.065045,0.062  
31,0.06403,0.062525,0.06549,0.054648,0.055862,0.054577,0.054869,0.0563  
8,0.054391,0.054926,0.055287,0.055078,0.054669,0.055765,0.055056,0.054  
911,0.05513,0.05643,0.054946,0.053502,0.054807,0.055214,0.055743,0.053  
65,0.054865,0.054643,0.054511,0.055701,0.062863,0.066906,0.066031,0.06  
565,0.055031,0.0537,0.05577,0.05483,0.055211,0.054566,0.055629,0.05579  
8,0.055221,0.055186,0.055195,0.055759,0.055122,0.055007,0.054467,0.055

835,0.054802,0.055437,0.054828,0.054694,0.054962,0.054132,0.055899,0.056264,0.054409,0.054475,0.056263,0.05528,0.055281,0.055681,0.055625,0.053691,0.054794,0.054272,0.054248,0.054764,0.054804,0.056056,0.055556,0.0556,0.054233,0.055154,0.055514,0.055223,0.055181,0.053875,0.055042,0.055778,0.056194,0.055702,0.05521,0.055069,0.054199,0.055439,0.055407,0.055012,0.054594,0.055094,0.055351,0.053928,0.056005,0.055381,0.055732,0.054799,0.054271,0.054163,0.054442,0.055389,0.055351,0.055768,0.055301,0.055501,0.054205,0.055593,0.055777,0.054434,0.055549,0.054619,0.055536,0.054643,0.054945,0.053735,0.054849,0.054638,0.055218,0.054607,0.053617,0.053802,0.05568,0.055248,0.054392,0.054515,0.053562,0.055828,0.055089,0.055581,0.054776,0.054768,0.054862,0.054868,0.055751,0.054318,0.056334,0.054243,0.055124,0.054806,0.055611,0.055082,0.054897,0.05476,0.055676,0.055153,0.055035,0.056096,0.055136,0.055618,0.054816,0.054493,0.055281,0.055447,0.0561,0.055002,0.055512,0.055494,0.05534,0.054384,0.054739,0.054328,0.054829,0.054519,0.054867,0.055515,0.054785,0.055897,0.055486,0.054876,0.055004,0.055214,0.054899,0.054183,0.056163,0.054867,0.055629,0.055299,0.056063,0.055357,0.055989,0.054717,0.054482,0.05434,0.054773,0.054572,0.05503,0.05559,0.053936,0.05468,0.053763,0.056044,0.055592,0.055806,0.055238,0.055653,0.054299,0.055867,0.055089,0.054858,0.054894,0.055368,0.055075,0.054681,0.054139,0.054894,0.055788,0.055503,0.054737,0.05465,0.053964,0.054525,0.054556,0.056291,0.054949,0.055417,0.054014,0.055364,0.054464,0.055252,0.055857,0.056285,0.055413,0.055715,0.055608,0.055336,0.053535,0.055684,0.055838  
0.073465,0.074357,0.073786,0.073369,0.073829,0.07374,0.073967,0.074297,0.073228,0.073828,0.073572,0.073489,0.073343,0.072724,0.073832,0.074341,0.074586,0.073841,0.074169,0.073084,0.19858,0.21369,0.22785,0.17417,0.073325,0.074411,0.073713,0.073975,0.073563,0.074225,0.074111,0.074628,0.074186,0.073583,0.074474,0.073729,0.073991,0.073667,0.073828,0.35069,0.20945,0.22143,0.21201,0.21202,0.22161,0.23173,0.07328,0.073246,0.074165,0.073859,0.074538,0.073834,0.074144,0.074293,0.073707,0.072788,0.07367,0.07414,0.074208,0.073312,0.074045,0.35709,0.35292,0.19749,0.25342,0.21926,0.21816,0.22561,0.23452,0.22176,0.21385,0.073136,0.073348,0.074061,0.074457,0.073565,0.074148,0.073932,0.073134,0.073384,0.074239,0.073841,0.074589,0.073571,0.07419,0.073311,0.35607,0.3583,0.35079,0.20457,0.19172,0.21784,0.21383,0.21164,0.22176,0.21401,0.18665,0.23938,0.073308,0.07383,0.074284,0.073641,0.074106,0.07393,0.073448,0.0736,0.074362,0.074754,0.073193,0.073884,0.073529,0.073673,0.073197,0.074087,0.35773,0.35733,0.35608,0.35746,0.19595,0.22698,0.2535,0.21839,0.21268,0.21347,0.20376,0.21947,0.17837,0.21471,0.074032,0.074081,0.073727,0.07355,0.074128,0.073522,0.07361,0.07382,0.073784,0.074259,0.074154,0.07407,0.074084,0.073165,0.073583,0.074243,0.36285,0.36736,0.34833,0.3509,0.36122,0.35911,0.19758,0.21241,0.22631,0.20774,0.22837,0.2227,0.21125,0.21577,0.24486,0.21836,0.074134,0.073652,0.074228,0.073715,0.073429,0.073876,0.073409,0.073626,0.073346,0.073879,0.073324,0.074111,0.074589,0.073549,0.074313,0.073927,0.073647,0.36869,0.35896,0.34957,0.36146,0.36743,0.3609,0.20411,0.23926,0.2369,0.2113,0.20774,0.21382,0.22262,0.25661,0.20885,0.21977,0.21752,0.074572,0.073353,0.074243,0.073564,0.073856,0.073392,0.073611,0.072707,0.073311,0.073868,0.074265,0.073933,0.074267,0.064769,0.064389,0.064617,0.074202,0.35208,0.35904,0.35617,0.35715,0.35774,0.36314,0.34985,0.21233,0.22489,0.21746,0.23024,0.20397,0.20651,0.22154,0.16077,0.20799,0.21753,0.20952,0.073309,0.073354,0.073083,0.073871,0.073705,0.074045,0.074287,0.073105,0.073145,0.0740

95,0.073374,0.062568,0.063696,0.064671,0.063308,0.063818,0.063182,0.07  
3118,0.35509,0.34615,0.3552,0.35375,0.35327,0.35366,0.37464,0.20622,0.  
23481,0.19863,0.23356,0.21873,0.21515,0.21787,0.21294,0.211,0.21116,0.  
19365,0.07336,0.073588,0.072965,0.074259,0.073784,0.073465,0.073683,0.  
074729,0.072894,0.064327,0.064547,0.066403,0.066734,0.065636,0.063534,  
0.063556,0.063341,0.065458,0.073916,0.34531,0.35336,0.35358,0.3589,0.3  
5729,0.34734,0.36058,0.2108,0.22086,0.21013,0.21896,0.2136,0.22296,0.2  
1707,0.22141,0.21827,0.21533,0.21433,0.20494,0.073307,0.073323,0.07363  
9,0.074096,0.074628,0.075154,0.061905,0.062994,0.063671,0.064663,0.064  
841,0.065093,0.065035,0.062565,0.064077,0.06291,0.066109,0.064981,0.35  
989,0.35894,0.36234,0.36117,0.37041,0.36433,0.35725,0.21252,0.20671,0.  
21877,0.21152,0.20898,0.20685,0.21741,0.25777,0.18734,0.21349,0.2179,0.  
.20371,0.073763,0.07451,0.073353,0.065192,0.064039,0.065011,0.064419,0.  
.064809,0.064061,0.064425,0.064783,0.064167,0.064314,0.068207,0.064706  
,0.065084,0.063256,0.064681,0.36046,0.35574,0.35475,0.35961,0.35999,0.  
35532,0.36062,0.34563,0.3609,0.23039,0.21313,0.21683,0.20395,0.17791,0.  
.21764,0.23549,0.23311,0.15807,0.19933,0.22194,0.063828,0.064075,0.064  
117,0.064366,0.063935,0.064955,0.06482,0.063687,0.062114,0.065003,0.06  
5173,0.06608,0.06311,0.064543,0.065805,0.065603,0.064261,0.065289,0.36  
653,0.35829,0.35625,0.35494,0.35213,0.35371,0.36219,0.36754,0.36576,0.  
20142,0.21269,0.16842,0.18569,0.13809,0.16821,0.16236,0.15331,0.16792,  
0.16273,0.16759,0.063996,0.065298,0.063732,0.066388,0.064247,0.064771,  
0.061809,0.064241,0.064252,0.063041,0.063915,0.0653,0.065327,0.06247,0.  
.063859,0.063583,0.064185,0.065069,0.3617,0.3592,0.35535,0.35407,0.361  
24,0.35348,0.36656,0.35441,0.3495,0.21536,0.15639,0.14062,0.1605,0.173  
23,0.15286,0.1629,0.15035,0.16842,0.14772,0.17078,0.060888,0.064418,0.  
064015,0.067871,0.064328,0.06438,0.064996,0.065228,0.063131,0.063923,0.  
.063266,0.064398,0.064626,0.064588,0.061165,0.06434,0.064093,0.064567,  
0.36682,0.36091,0.35432,0.37039,0.35646,0.35035,0.35567,0.2045,0.19414  
,0.213,0.19351,0.18414,0.16356,0.17517,0.17326,0.16588,0.162,0.15517,0.  
.14533,0.16504,0.063739,0.06462,0.066149,0.064479,0.064071,0.066093,0.  
061551,0.06393,0.064963,0.064838,0.063661,0.064026,0.064896,0.06739,0.  
064035,0.065864,0.064321,0.060971,0.3574,0.35765,0.34653,0.35907,0.362  
63,0.36186,0.19412,0.20772,0.22549,0.25619,0.15884,0.16576,0.14273,0.1  
1874,0.17487,0.18033,0.16715,0.14026,0.16797,0.14785,0.065792,0.063796  
,0.06453,0.064007,0.06538,0.064757,0.062909,0.063633,0.065341,0.063993  
,0.064077,0.063807,0.063588,0.065547,0.063761,0.062111,0.061282,0.0648  
95,0.3627,0.35939,0.35766,0.36404,0.35703,0.19356,0.18906,0.21519,0.21  
121,0.20101,0.17108,0.15344,0.17686,0.17638,0.13988,0.15658,0.16522,0.  
18838,0.17287,0.16999,0.065297,0.064577,0.061323,0.061722,0.063923,0.0  
62489,0.065383,0.064298,0.063639,0.064205,0.064286,0.06403,0.06437,0.0  
62158,0.065692,0.062287,0.06338,0.064192,0.35206,0.36196,0.35656,0.174  
11,0.2219,0.23249,0.19301,0.21967,0.20378,0.20706,0.22366,0.17194,0.16  
178,0.17074,0.11794,0.16318,0.15765,0.16585,0.18673,0.16009,0.065489,0.  
.064184,0.064038,0.065587,0.063825,0.062962,0.06461,0.064149,0.063896,  
0.064693,0.063924,0.065961,0.064748,0.06408,0.063834,0.064624,0.064574  
,0.065856,0.36093,0.16913,0.18932,0.17668,0.19326,0.20751,0.21066,0.18  
415,0.2045,0.20804,0.16433,0.13239,0.16885,0.15608,0.15328,0.14654,0.1  
3762,0.16968,0.16393,0.063958,0.065421,0.065501,0.064359,0.06405,0.064  
397,0.063632,0.063665,0.066532,0.063322,0.063051,0.065053,0.064452,0.0  
67295,0.064511,0.065214,0.065449,0.054109,0.19997,0.20303,0.17839,0.20  
328,0.2111,0.19239,0.21785,0.17302,0.20796,0.21016,0.15134,0.15175,0.1

6992,0.18347,0.16968,0.12659,0.17912,0.17287,0.16394,0.063358,0.062251  
,0.063161,0.063848,0.064608,0.063165,0.065495,0.06453,0.064704,0.06411  
,0.063145,0.064461,0.064052,0.0619,0.064128,0.065493,0.063412,0.054301  
,0.21001,0.21054,0.18977,0.22573,0.16553,0.19951,0.20779,0.25622,0.214  
79,0.20013,0.16187,0.16254,0.15065,0.14272,0.16162,0.16592,0.1474,0.16  
108,0.064245,0.064705,0.064983,0.063861,0.065124,0.064317,0.065121,0.0  
64063,0.064931,0.064023,0.064692,0.064511,0.063188,0.064238,0.065413,0  
.062129,0.062675,0.06341,0.055085,0.19428,0.17743,0.20932,0.19828,0.20  
685,0.21346,0.16248,0.22752,0.2035,0.20987,0.16877,0.16314,0.17639,0.1  
7785,0.18212,0.18258,0.16697,0.16435,0.064925,0.063506,0.068841,0.0638  
6,0.065671,0.064107,0.060559,0.065791,0.06551,0.06553,0.063167,0.06580  
2,0.063532,0.064328,0.066076,0.064449,0.06408,0.054142,0.055549,0.0543  
44,0.21425,0.20291,0.16886,0.20033,0.2078,0.20651,0.19991,0.22305,0.20  
655,0.16072,0.16098,0.13988,0.16274,0.16331,0.1715,0.064093,0.064735,0  
.064891,0.062598,0.064912,0.063478,0.065136,0.06351,0.06623,0.064244,0  
.062068,0.064198,0.063842,0.06429,0.063636,0.066289,0.065129,0.063571,  
0.053648,0.05424,0.054536,0.055102,0.21289,0.19328,0.20752,0.19267,0.1  
9983,0.23043,0.22111,0.20996,0.13738,0.16519,0.1555,0.15257,0.062836,0  
.066028,0.064512,0.066406,0.064907,0.06396,0.064528,0.064131,0.064639,  
0.061764,0.061958,0.06442,0.06397,0.064547,0.064786,0.06449,0.060583,0  
.063713,0.064756,0.063689,0.05316,0.055227,0.053582,0.054554,0.054493,  
0.054673,0.25532,0.18988,0.20792,0.21077,0.20682,0.24365,0.18152,0.257  
71,0.062088,0.064902,0.063307,0.065038,0.064571,0.064989,0.06366,0.064  
368,0.063939,0.065654,0.063308,0.064226,0.064112,0.064368,0.062657,0.0  
63812,0.062908,0.064073,0.062942,0.065763,0.06941,0.064478,0.063661,0.  
054257,0.053812,0.054488,0.055312,0.055135,0.055468,0.20379,0.20769,0.  
22398,0.21209,0.20531,0.055259,0.053517,0.063893,0.065543,0.064543,0.0  
65207,0.065522,0.064001,0.065525,0.062708,0.064533,0.06407,0.064422,0.  
063728,0.062168,0.063308,0.063654,0.063469,0.06589,0.06461,0.064277,0.  
064159,0.06433,0.054245,0.054261,0.05373,0.054885,0.054038,0.054787,0.  
054605,0.054805,0.054756,0.054676,0.20542,0.21471,0.055476,0.054922,0.  
053351,0.054744,0.064745,0.064237,0.064432,0.065217,0.064252,0.064458,  
0.064168,0.062828,0.064267,0.064498,0.063123,0.063671,0.063871,0.06652  
,0.064587,0.0644,0.061674,0.064549,0.064476,0.055458,0.054079,0.054,0.  
055127,0.055057,0.054067,0.05427,0.054558,0.055145,0.054514,0.054008,0  
.054429,0.054087,0.054428,0.054418,0.054873,0.05378,0.063971,0.064216,  
0.065167,0.066498,0.065491,0.064174,0.064515,0.064443,0.062947,0.06313  
3,0.065289,0.064312,0.064456,0.06572,0.065071,0.059654,0.054454,0.0548  
55,0.053936,0.053841,0.054771,0.054494,0.055038,0.054155,0.055399,0.05  
4177,0.055133,0.054777,0.054754,0.054255,0.052898,0.054391,0.05483,0.0  
54323,0.054527,0.063036,0.063217,0.064037,0.065419,0.06434,0.064507,0.  
066061,0.062088,0.06331,0.062345,0.065274,0.064489,0.06292,0.055397,0.  
054756,0.054068,0.055066,0.054729,0.054276,0.054446,0.054427,0.05408,0  
.054436,0.055093,0.054274,0.054565,0.05492,0.054337,0.053742,0.054252,  
0.054684,0.054537,0.053882,0.054588,0.065628,0.065496,0.063103,0.06336  
6,0.064053,0.061371,0.062875,0.061509,0.064716,0.054318,0.055502,0.054  
663,0.054208,0.056277,0.05386,0.054531,0.055113,0.054691,0.054367,0.05  
4976,0.055113,0.053928,0.054543,0.055998,0.054668,0.053277,0.054656,0.  
054789,0.054963,0.053647,0.054278,0.053921,0.053704,0.055371,0.061912,  
0.066032,0.064893,0.06467,0.054555,0.053368,0.05543,0.054319,0.054923,  
0.054041,0.055446,0.054607,0.054958,0.054708,0.055095,0.055488,0.05489  
3,0.054303,0.053387,0.055619,0.054544,0.054913,0.054368,0.054338,0.054



789,0.053957,0.055359,0.055656,0.054355,0.054349,0.055975,0.054622,0.054815,0.055221,0.054904,0.053097,0.054251,0.054253,0.053783,0.054487,0.054449,0.054835,0.054813,0.054843,0.053912,0.055026,0.055026,0.054706,0.054614,0.053786,0.054775,0.055305,0.05569,0.055552,0.054677,0.054749,0.054164,0.055304,0.054546,0.054283,0.05416,0.054613,0.054937,0.05372,0.055482,0.054594,0.055162,0.054661,0.053993,0.05348,0.05457,0.05501,0.054878,0.05569,0.054976,0.054879,0.053944,0.055512,0.055759,0.053807,0.055416,0.05448,0.054914,0.054322,0.054584,0.053716,0.054409,0.053912,0.055129,0.05368,0.053492,0.053169,0.054803,0.054443,0.053744,0.053724,0.053423,0.054991,0.054383,0.055007,0.054711,0.054405,0.054601,0.054551,0.055365,0.054154,0.056196,0.053501,0.05444,0.054221,0.055062,0.054542,0.054423,0.054437,0.055103,0.05486,0.054395,0.05542,0.055027,0.055278,0.054472,0.053816,0.05524,0.054653,0.055784,0.054686,0.054951,0.054918,0.054428,0.054273,0.054544,0.054176,0.054228,0.054039,0.0541,0.054942,0.053982,0.055106,0.054961,0.054533,0.054259,0.054873,0.054556,0.053959,0.055707,0.05455,0.055128,0.054903,0.055246,0.054982,0.055546,0.054138,0.053712,0.054412,0.054104,0.054256,0.054458,0.055027,0.053992,0.053928,0.053658,0.055371,0.055383,0.055423,0.054806,0.055143,0.053836,0.05546,0.054914,0.054612,0.054389,0.054388,0.055055,0.053502,0.053626,0.054797,0.055174,0.05552,0.054266,0.053958,0.053901,0.054442,0.054003,0.055451,0.054795,0.055425,0.053597,0.054748,0.054266,0.054691,0.055398,0.055837,0.054965,0.055545,0.055155,0.054539,0.052958,0.055539,0.055575
