# Supplementary material for: Unsupervised Deconvolution of Dynamic Imaging Reveals Intratumor Vascular Heterogeneity and Repopulation Dynamics
Source: PubMed Central journal article supplement (PMC4224420; doi:10.1371/journal.pone.0112143), 2014-11-07
Supplement: pone.0112143.s013.pdf [file pone.0112143.s013.pdf]

|        |        |        |        |        |        |        |        |        |
|--------|--------|--------|--------|--------|--------|--------|--------|--------|
| 0.0179 | 0.0114 | 0.0092 | 0.0088 | 0.0087 | 0.0083 | 0.0076 | 0.008  | 0.0084 |
| 0.0248 | 0.0141 | 0.0121 | 0.0116 | 0.0118 | 0.012  | 0.0125 | 0.0118 | 0.0115 |
| 0.0251 | 0.0138 | 0.0113 | 0.0103 | 0.0099 | 0.0098 | 0.009  | 0.0091 | 0.0095 |
| 0.0182 | 0.0108 | 0.0091 | 0.0085 | 0.009  | 0.0092 | 0.0094 | 0.0089 | 0.0083 |
| 0      | 0      | 0      | 0      | 0      | 0      | 0      | 0      | 0      |
| 0      | 0      | 0      | 0      | 0      | 0      | 0      | 0      | 0      |
| 0      | 0      | 0      | 0      | 0      | 0      | 0      | 0      | 0      |
| 0      | 0      | 0      | 0      | 0      | 0      | 0      | 0      | 0      |
| 0      | 0      | 0      | 0      | 0      | 0      | 0      | 0      | 0      |
| 0      | 0      | 0      | 0      | 0      | 0      | 0      | 0      | 0      |
| 0      | 0      | 0      | 0      | 0      | 0      | 0      | 0      | 0      |
| 0      | 0      | 0      | 0      | 0      | 0      | 0      | 0      | 0      |
| 0      | 0      | 0      | 0      | 0      | 0      | 0      | 0      | 0      |
| 0      | 0      | 0      | 0      | 0      | 0      | 0      | 0      | 0      |
| 0      | 0      | 0      | 0      | 0      | 0      | 0      | 0      | 0      |
| 0      | 0      | 0      | 0      | 0      | 0      | 0      | 0      | 0      |
| 0      | 0      | 0      | 0      | 0      | 0      | 0      | 0      | 0      |
| 0      | 0      | 0      | 0      | 0      | 0      | 0      | 0      | 0      |
| 0      | 0      | 0      | 0      | 0      | 0      | 0      | 0      | 0      |
| 0      | 0      | 0      | 0      | 0      | 0      | 0      | 0      | 0      |
| 0      | 0      | 0      | 0      | 0      | 0      | 0      | 0      | 0      |
| 0      | 0      | 0      | 0      | 0      | 0      | 0      | 0      | 0      |
| 0      | 0      | 0      | 0      | 0      | 0      | 0      | 0      | 0      |
| 0      | 0      | 0      | 0      | 0      | 0      | 0      | 0      | 0      |
| 0      | 0      | 0      | 0      | 0      | 0      | 0      | 0      | 0      |
| 0      | 0      | 0      | 0      | 0      | 0      | 0      | 0      | 0      |
| 0      | 0      | 0      | 0      | 0      | 0      | 0      | 0      | 0      |
| 0      | 0      | 0      | 0      | 0      | 0      | 0      | 0      | 0      |
| 0      | 0      | 0      | 0      | 0      | 0      | 0      | 0      | 0      |
| 0      | 0      | 0      | 0      | 0      | 0      | 0      | 0      | 0      |
| 0      | 0      | 0      | 0      | 0      | 0      | 0      | 0      | 0      |
| 0      | 0      | 0      | 0      | 0      | 0      | 0      | 0      | 0      |
| 0      | 0      | 0      | 0      | 0      | 0      | 0      | 0      | 0      |
| 0      | 0      | 0      | 0      | 0      | 0      | 0      | 0      | 0      |
| 0.0427 | 0.0258 | 0.0211 | 0.0195 | 0.0196 | 0.0198 | 0.0202 | 0.0208 | 0.0199 |
| 0.0008 | 0.0009 | 0.0011 | 0.0012 | 0.0014 | 0.0016 | 0.0018 | 0.0019 | 0.0018 |
| 0.04   | 0.0235 | 0.0183 | 0.0187 | 0.0194 | 0.02   | 0.0184 | 0.019  | 0.0192 |
| 0.0531 | 0.0315 | 0.0254 | 0.0242 | 0.0215 | 0.023  | 0.0223 | 0.0232 | 0.0245 |
| 0.0004 | 0.0004 | 0.0005 | 0.0006 | 0.0007 | 0.0007 | 0.0008 | 0.0009 | 0.0009 |
| 0.0003 | 0.0004 | 0.0005 | 0.0006 | 0.0006 | 0.0007 | 0.0008 | 0.0009 | 0.0009 |
| 0      | 0      | 0      | 0      | 0      | 0      | 0      | 0      | 0      |
| 0.052  | 0.0325 | 0.0255 | 0.026  | 0.0265 | 0.0268 | 0.0273 | 0.0268 | 0.0278 |
| 0      | 0      | 0      | 0      | 0      | 0      | 0      | 0      | 0      |
| 0      | 0      | 0      | 0      | 0      | 0      | 0      | 0      | 0      |
| 0      | 0      | 0      | 0      | 0      | 0      | 0      | 0      | 0      |
| 0      | 0      | 0      | 0      | 0      | 0      | 0      | 0      | 0      |
| 0      | 0      | 0      | 0      | 0      | 0      | 0      | 0      | 0      |
| 0.0167 | 0.0093 | 0.0076 | 0.0069 | 0.0071 | 0.0078 | 0.0078 | 0.0079 | 0.0083 |

|        |        |        |        |        |        |        |        |        |
|--------|--------|--------|--------|--------|--------|--------|--------|--------|
| 0.0078 | 0.0046 | 0.0036 | 0.0035 | 0.0034 | 0.0035 | 0.0035 | 0.0038 | 0.0041 |
| 0      | 0      | 0      | 0      | 0      | 0      | 0      | 0      | 0      |
| 0      | 0      | 0      | 0      | 0      | 0      | 0      | 0      | 0      |
| 0      | 0      | 0      | 0      | 0      | 0      | 0      | 0      | 0      |
| 0      | 0      | 0      | 0      | 0      | 0      | 0      | 0      | 0      |
| 0.0258 | 0.0152 | 0.0124 | 0.0116 | 0.0128 | 0.0136 | 0.0124 | 0.0122 | 0.0128 |
| 0.0418 | 0.0255 | 0.0184 | 0.0174 | 0.0178 | 0.018  | 0.016  | 0.018  | 0.0177 |
| 0.0326 | 0.0178 | 0.0147 | 0.0146 | 0.0144 | 0.0136 | 0.0135 | 0.013  | 0.0126 |
| 0.0086 | 0.0049 | 0.0038 | 0.0037 | 0.0036 | 0.0036 | 0.0033 | 0.003  | 0.0032 |
| 0      | 0      | 0      | 0      | 0      | 0      | 0      | 0      | 0      |
| 0      | 0      | 0      | 0      | 0      | 0      | 0      | 0      | 0      |
| 0      | 0      | 0      | 0      | 0      | 0      | 0      | 0      | 0      |
| 0      | 0      | 0      | 0      | 0      | 0      | 0      | 0      | 0      |
| 0      | 0      | 0      | 0      | 0      | 0      | 0      | 0      | 0      |
| 0      | 0      | 0      | 0      | 0      | 0      | 0      | 0      | 0      |
| 0      | 0      | 0      | 0      | 0      | 0      | 0      | 0      | 0      |
| 0      | 0      | 0      | 0      | 0      | 0      | 0      | 0      | 0      |
| 0      | 0      | 0      | 0      | 0      | 0      | 0      | 0      | 0      |
| 0      | 0      | 0      | 0      | 0      | 0      | 0      | 0      | 0      |
| 0      | 0      | 0      | 0      | 0      | 0      | 0      | 0      | 0      |
| 0      | 0      | 0      | 0      | 0      | 0      | 0      | 0      | 0      |
| 0      | 0      | 0      | 0      | 0      | 0      | 0      | 0      | 0      |
| 0      | 0      | 0      | 0      | 0      | 0      | 0      | 0      | 0      |
| 0      | 0      | 0      | 0      | 0      | 0      | 0      | 0      | 0      |
| 0      | 0      | 0      | 0      | 0      | 0      | 0      | 0      | 0      |
| 0      | 0      | 0      | 0      | 0      | 0      | 0      | 0      | 0      |
| 0      | 0      | 0      | 0      | 0      | 0      | 0      | 0      | 0      |
| 0      | 0      | 0      | 0      | 0      | 0      | 0      | 0      | 0      |
| 0      | 0      | 0      | 0      | 0      | 0      | 0      | 0      | 0      |
| 0      | 0      | 0      | 0      | 0      | 0      | 0      | 0      | 0      |
| 0      | 0      | 0      | 0      | 0      | 0      | 0      | 0      | 0      |
| 0      | 0      | 0      | 0      | 0      | 0      | 0      | 0      | 0      |
| 0      | 0      | 0      | 0      | 0      | 0      | 0      | 0      | 0      |
| 0      | 0      | 0      | 0      | 0      | 0      | 0      | 0      | 0      |
| 0      | 0      | 0      | 0      | 0      | 0      | 0      | 0      | 0      |
| 0      | 0      | 0      | 0      | 0      | 0      | 0      | 0      | 0      |
| 0      | 0      | 0      | 0      | 0      | 0      | 0      | 0      | 0      |
| 0      | 0      | 0      | 0      | 0      | 0      | 0      | 0      | 0      |
| 0      | 0      | 0      | 0      | 0      | 0      | 0      | 0      | 0      |
| 0      | 0      | 0      | 0      | 0      | 0      | 0      | 0      | 0      |
| 0      | 0      | 0      | 0      | 0      | 0      | 0      | 0      | 0      |
| 0      | 0      | 0      | 0      | 0      | 0      | 0      | 0      | 0      |
| 0      | 0      | 0      | 0      | 0      | 0      | 0      | 0      | 0      |
| 0      | 0      | 0      | 0      | 0      | 0      | 0      | 0      | 0      |
| 0      | 0      | 0      | 0      | 0      | 0      | 0      | 0      | 0      |
| 0      | 0      | 0      | 0      | 0      | 0      | 0      | 0      | 0      |
| 0      | 0      | 0      | 0      | 0      | 0      | 0      | 0      | 0      |
| 0      | 0      | 0      | 0      | 0      | 0      | 0      | 0      | 0      |
| 0      | 0      | 0      | 0      | 0      | 0      | 0      | 0      | 0      |
| 0      | 0      | 0      | 0      | 0      | 0      | 0      | 0      | 0      |
| 0      | 0      | 0      | 0      | 0      | 0      | 0      | 0      | 0      |
| 0      | 0      | 0      | 0      | 0      | 0      | 0      | 0      | 0      |
| 0      | 0      | 0      | 0      | 0      | 0      | 0      | 0      | 0      |
| 0      | 0      | 0      | 0      | 0      | 0      | 0      | 0      | 0      |
| 0.0565 | 0.0348 | 0.027  | 0.0253 | 0.0259 | 0.0246 | 0.0232 | 0.0269 | 0.0289 |
| 0.0311 | 0.0176 | 0.0131 | 0.0135 | 0.0145 | 0.0142 | 0.0129 | 0.0135 | 0.0125 |
| 0.0688 | 0.0429 | 0.0368 | 0.0356 | 0.0349 | 0.0348 | 0.0349 | 0.0351 | 0.0352 |
| 0.081  | 0.0479 | 0.0375 | 0.0335 | 0.0319 | 0.0339 | 0.0337 | 0.0374 | 0.0375 |
| 0.0266 | 0.0161 | 0.0131 | 0.0114 | 0.0115 | 0.0114 | 0.0109 | 0.0115 | 0.012  |
| 0.0165 | 0.0094 | 0.0076 | 0.007  | 0.0074 | 0.0077 | 0.0076 | 0.0076 | 0.0071 |
| 0.0542 | 0.0309 | 0.0239 | 0.0251 | 0.0259 | 0.0272 | 0.027  | 0.0277 | 0.0276 |
| 0.0646 | 0.0386 | 0.0315 | 0.0329 | 0.0324 | 0.0335 | 0.0327 | 0.0331 | 0.0298 |

|        |        |        |        |        |        |        |        |        |
|--------|--------|--------|--------|--------|--------|--------|--------|--------|
| 0.0996 | 0.0609 | 0.051  | 0.0507 | 0.0526 | 0.0496 | 0.0476 | 0.0458 | 0.0485 |
| 0.0843 | 0.0484 | 0.0381 | 0.0361 | 0.0362 | 0.0362 | 0.0341 | 0.0355 | 0.0388 |
| 0.0749 | 0.0457 | 0.0378 | 0.0374 | 0.0366 | 0.0387 | 0.0366 | 0.036  | 0.0392 |
| 0.0755 | 0.046  | 0.0383 | 0.0379 | 0.0349 | 0.0344 | 0.0341 | 0.035  | 0.0342 |
| 0.0756 | 0.0478 | 0.0369 | 0.0368 | 0.0376 | 0.0347 | 0.0327 | 0.0318 | 0.0334 |
| 0.052  | 0.0331 | 0.0269 | 0.0253 | 0.024  | 0.0233 | 0.0252 | 0.0257 | 0.0253 |
| 0.0086 | 0.005  | 0.004  | 0.0037 | 0.0037 | 0.0037 | 0.0033 | 0.0035 | 0.0035 |
| 0      | 0      | 0      | 0      | 0      | 0      | 0      | 0      | 0      |
| 0      | 0      | 0      | 0      | 0      | 0      | 0      | 0      | 0      |
| 0      | 0      | 0      | 0      | 0      | 0      | 0      | 0      | 0      |
| 0.0092 | 0.0057 | 0.0047 | 0.0044 | 0.0043 | 0.0043 | 0.0043 | 0.0042 | 0.0044 |
| 0.0258 | 0.0156 | 0.0121 | 0.0119 | 0.0115 | 0.0118 | 0.0111 | 0.0108 | 0.0111 |
| 0.0418 | 0.0239 | 0.0179 | 0.0174 | 0.0183 | 0.0197 | 0.0176 | 0.0165 | 0.0173 |
| 0.035  | 0.022  | 0.0192 | 0.0189 | 0.0188 | 0.0179 | 0.0163 | 0.0168 | 0.0185 |
| 0.0174 | 0.0109 | 0.0089 | 0.0083 | 0.0083 | 0.0084 | 0.0077 | 0.0075 | 0.0084 |
| 0      | 0      | 0      | 0      | 0      | 0      | 0      | 0      | 0      |
| 0      | 0      | 0      | 0      | 0      | 0      | 0      | 0      | 0      |
| 0      | 0      | 0      | 0      | 0      | 0      | 0      | 0      | 0      |
| 0      | 0      | 0      | 0      | 0      | 0      | 0      | 0      | 0      |
| 0      | 0      | 0      | 0      | 0      | 0      | 0      | 0      | 0      |
| 0      | 0      | 0      | 0      | 0      | 0      | 0      | 0      | 0      |
| 0      | 0      | 0      | 0      | 0      | 0      | 0      | 0      | 0      |
| 0      | 0      | 0      | 0      | 0      | 0      | 0      | 0      | 0      |
| 0      | 0      | 0      | 0      | 0      | 0      | 0      | 0      | 0      |
| 0      | 0      | 0      | 0      | 0      | 0      | 0      | 0      | 0      |
| 0      | 0      | 0      | 0      | 0      | 0      | 0      | 0      | 0      |
| 0      | 0      | 0      | 0      | 0      | 0      | 0      | 0      | 0      |
| 0      | 0      | 0      | 0      | 0      | 0      | 0      | 0      | 0      |
| 0      | 0      | 0      | 0      | 0      | 0      | 0      | 0      | 0      |
| 0      | 0      | 0      | 0      | 0      | 0      | 0      | 0      | 0      |
| 0      | 0      | 0      | 0      | 0      | 0      | 0      | 0      | 0      |
| 0      | 0      | 0      | 0      | 0      | 0      | 0      | 0      | 0      |
| 0      | 0      | 0      | 0      | 0      | 0      | 0      | 0      | 0      |
| 0      | 0      | 0      | 0      | 0      | 0      | 0      | 0      | 0      |
| 0      | 0      | 0      | 0      | 0      | 0      | 0      | 0      | 0      |
| 0      | 0      | 0      | 0      | 0      | 0      | 0      | 0      | 0      |
| 0      | 0      | 0      | 0      | 0      | 0      | 0      | 0      | 0      |
| 0      | 0      | 0      | 0      | 0      | 0      | 0      | 0      | 0      |
| 0      | 0      | 0      | 0      | 0      | 0      | 0      | 0      | 0      |
| 0      | 0      | 0      | 0      | 0      | 0      | 0      | 0      | 0      |
| 0      | 0      | 0      | 0      | 0      | 0      | 0      | 0      | 0      |
| 0      | 0      | 0      | 0      | 0      | 0      | 0      | 0      | 0      |
| 0      | 0      | 0      | 0      | 0      | 0      | 0      | 0      | 0      |
| 0      | 0      | 0      | 0      | 0      | 0      | 0      | 0      | 0      |
| 0      | 0      | 0      | 0      | 0      | 0      | 0      | 0      | 0      |
| 0      | 0      | 0      | 0      | 0      | 0      | 0      | 0      | 0      |
| 0      | 0      | 0      | 0      | 0      | 0      | 0      | 0      | 0      |
| 0.0011 | 0.0013 | 0.0017 | 0.0019 | 0.002  | 0.0022 | 0.0025 | 0.0029 | 0.0029 |
| 0.127  | 0.0709 | 0.0574 | 0.0593 | 0.0604 | 0.0613 | 0.0602 | 0.0639 | 0.064  |













|        |        |        |        |        |        |        |        |        |
|--------|--------|--------|--------|--------|--------|--------|--------|--------|
| 0.0274 | 0.0174 | 0.0149 | 0.014  | 0.0143 | 0.015  | 0.0153 | 0.0151 | 0.0149 |
| 0.0516 | 0.0297 | 0.0252 | 0.0242 | 0.0236 | 0.024  | 0.0228 | 0.0231 | 0.0215 |
| 0      | 0      | 0      | 0      | 0      | 0      | 0      | 0      | 0      |
| 0      | 0      | 0      | 0      | 0      | 0      | 0      | 0      | 0      |
| 0      | 0      | 0      | 0      | 0      | 0      | 0      | 0      | 0      |
| 0      | 0      | 0      | 0      | 0      | 0      | 0      | 0      | 0      |
| 0      | 0      | 0      | 0      | 0      | 0      | 0      | 0      | 0      |
| 0      | 0      | 0      | 0      | 0      | 0      | 0      | 0      | 0      |
| 0      | 0      | 0      | 0      | 0      | 0      | 0      | 0      | 0      |
| 0      | 0      | 0      | 0      | 0      | 0      | 0      | 0      | 0      |
| 0      | 0      | 0      | 0      | 0      | 0      | 0      | 0      | 0      |
| 0.002  | 0.0039 | 0.0043 | 0.0044 | 0.0045 | 0.0043 | 0.0044 | 0.0043 | 0.0042 |
| 0.0028 | 0.0088 | 0.0081 | 0.0084 | 0.0078 | 0.0071 | 0.0067 | 0.005  | 0.0054 |
| 0.0175 | 0.0177 | 0.0188 | 0.0207 | 0.0212 | 0.0222 | 0.0227 | 0.0234 | 0.0229 |
| 0.0083 | 0.0049 | 0.004  | 0.0038 | 0.0042 | 0.0044 | 0.0043 | 0.004  | 0.0038 |
| 0.0118 | 0.0093 | 0.0092 | 0.0097 | 0.0104 | 0.0113 | 0.0118 | 0.0121 | 0.0122 |
| 0.0181 | 0.0127 | 0.0106 | 0.0102 | 0.0107 | 0.0107 | 0.0104 | 0.01   | 0.0095 |
| 0.0167 | 0.0096 | 0.0078 | 0.0069 | 0.007  | 0.0075 | 0.0075 | 0.0078 | 0.0076 |
| 0      | 0      | 0      | 0      | 0      | 0      | 0      | 0      | 0      |
| 0.031  | 0.0232 | 0.0216 | 0.0212 | 0.0214 | 0.0221 | 0.022  | 0.0223 | 0.0223 |
| 0.025  | 0.017  | 0.0139 | 0.0141 | 0.0153 | 0.0158 | 0.0159 | 0.0158 | 0.0157 |
| 0.0802 | 0.055  | 0.0443 | 0.0413 | 0.0414 | 0.039  | 0.0367 | 0.039  | 0.0392 |
| 0.0274 | 0.0193 | 0.0164 | 0.0158 | 0.0155 | 0.0152 | 0.0152 | 0.0145 | 0.0142 |
| 0.0489 | 0.0325 | 0.0295 | 0.0298 | 0.0297 | 0.0311 | 0.0333 | 0.0344 | 0.0338 |
| 0.1531 | 0.0997 | 0.0853 | 0.0814 | 0.0859 | 0.0885 | 0.0889 | 0.091  | 0.0903 |
| 0.0038 | 0.0041 | 0.0054 | 0.0063 | 0.0073 | 0.0078 | 0.0084 | 0.0099 | 0.01   |
| 0.1228 | 0.0781 | 0.0646 | 0.0628 | 0.0614 | 0.064  | 0.0639 | 0.0615 | 0.0619 |
| 0.3536 | 0.2041 | 0.1558 | 0.1496 | 0.1386 | 0.1458 | 0.1464 | 0.1489 | 0.1479 |
| 0.3594 | 0.204  | 0.1655 | 0.1639 | 0.1594 | 0.1595 | 0.1497 | 0.1587 | 0.1496 |
| 0.1043 | 0.0635 | 0.0502 | 0.0449 | 0.0428 | 0.0434 | 0.0431 | 0.0429 | 0.0432 |
| 0.0017 | 0.002  | 0.0025 | 0.0031 | 0.003  | 0.0035 | 0.0039 | 0.0045 | 0.0045 |
| 0.0737 | 0.0454 | 0.0368 | 0.0313 | 0.0321 | 0.0319 | 0.0327 | 0.0297 | 0.028  |
| 0.0767 | 0.0442 | 0.0349 | 0.0353 | 0.034  | 0.0357 | 0.0345 | 0.0364 | 0.0351 |
| 0      | 0      | 0      | 0      | 0      | 0      | 0      | 0      | 0      |
| 0.3556 | 0.2208 | 0.1785 | 0.1566 | 0.1513 | 0.1484 | 0.1458 | 0.1598 | 0.1574 |
| 0.4494 | 0.2676 | 0.2144 | 0.2082 | 0.1983 | 0.2106 | 0.195  | 0.1909 | 0.1993 |
| 0.6973 | 0.4205 | 0.3458 | 0.3384 | 0.3459 | 0.3458 | 0.3404 | 0.3576 | 0.3439 |
| 0.3434 | 0.2132 | 0.1771 | 0.1705 | 0.1666 | 0.1638 | 0.1626 | 0.1548 | 0.1424 |
| 0.3043 | 0.1691 | 0.1339 | 0.1195 | 0.1235 | 0.1268 | 0.1198 | 0.1166 | 0.1183 |
| 1.3057 | 0.8192 | 0.6427 | 0.5974 | 0.5687 | 0.5572 | 0.5492 | 0.5635 | 0.5639 |
| 1.2305 | 0.7371 | 0.5578 | 0.531  | 0.5201 | 0.5297 | 0.4878 | 0.5114 | 0.4715 |
| 0.4082 | 0.2536 | 0.1999 | 0.192  | 0.19   | 0.1934 | 0.1826 | 0.1784 | 0.1805 |

|        |        |        |        |        |        |        |        |        |
|--------|--------|--------|--------|--------|--------|--------|--------|--------|
| 0.8097 | 0.4741 | 0.3983 | 0.3836 | 0.3886 | 0.371  | 0.3452 | 0.3391 | 0.3428 |
| 0.9234 | 0.5867 | 0.482  | 0.4075 | 0.3874 | 0.3798 | 0.3689 | 0.3895 | 0.3967 |
| 0.9739 | 0.5777 | 0.5072 | 0.4595 | 0.4695 | 0.4375 | 0.4082 | 0.41   | 0.4122 |
| 0.5299 | 0.32   | 0.2618 | 0.2626 | 0.2802 | 0.2788 | 0.2625 | 0.278  | 0.2651 |
| 0.1719 | 0.106  | 0.0899 | 0.0814 | 0.0868 | 0.0904 | 0.0922 | 0.0967 | 0.0945 |
| 0.0012 | 0.0015 | 0.0019 | 0.0025 | 0.0028 | 0.0033 | 0.0037 | 0.0036 | 0.0032 |
| 0      | 0      | 0      | 0      | 0      | 0      | 0      | 0      | 0      |
| 0.0089 | 0.0054 | 0.0043 | 0.0042 | 0.0044 | 0.0046 | 0.0043 | 0.0042 | 0.0042 |
| 0      | 0      | 0      | 0      | 0      | 0      | 0      | 0      | 0      |
| 0      | 0      | 0      | 0      | 0      | 0      | 0      | 0      | 0      |
| 0      | 0      | 0      | 0      | 0      | 0      | 0      | 0      | 0      |
| 0      | 0      | 0      | 0      | 0      | 0      | 0      | 0      | 0      |
| 0      | 0      | 0      | 0      | 0      | 0      | 0      | 0      | 0      |
| 0      | 0      | 0      | 0      | 0      | 0      | 0      | 0      | 0      |
| 0      | 0      | 0      | 0      | 0      | 0      | 0      | 0      | 0      |
| 0      | 0      | 0      | 0      | 0      | 0      | 0      | 0      | 0      |
| 0      | 0      | 0      | 0      | 0      | 0      | 0      | 0      | 0      |
| 0      | 0      | 0      | 0      | 0      | 0      | 0      | 0      | 0      |
| 0.0074 | 0.0136 | 0.0145 | 0.0154 | 0.0168 | 0.0162 | 0.0174 | 0.0175 | 0.0168 |
| 0.0047 | 0.0048 | 0.0058 | 0.0066 | 0.0071 | 0.0084 | 0.009  | 0.0095 | 0.0094 |
| 0      | 0      | 0      | 0      | 0      | 0      | 0      | 0      | 0      |
| 0      | 0      | 0      | 0      | 0      | 0      | 0      | 0      | 0      |
| 0.0089 | 0.0055 | 0.0046 | 0.0045 | 0.0045 | 0.0046 | 0.004  | 0.004  | 0.0037 |
| 0.015  | 0.0167 | 0.0167 | 0.017  | 0.0173 | 0.0179 | 0.019  | 0.0192 | 0.0188 |
| 0.0161 | 0.0193 | 0.0194 | 0.0207 | 0.0219 | 0.0224 | 0.024  | 0.0243 | 0.0245 |
| 0.0119 | 0.0091 | 0.0094 | 0.0103 | 0.011  | 0.0114 | 0.0124 | 0.0131 | 0.0131 |
| 0.0602 | 0.0468 | 0.0424 | 0.0424 | 0.0435 | 0.0448 | 0.0454 | 0.0462 | 0.0453 |
| 0.1085 | 0.0624 | 0.0502 | 0.0482 | 0.0518 | 0.05   | 0.0492 | 0.0499 | 0.0475 |
| 0.0558 | 0.0359 | 0.0298 | 0.0296 | 0.0287 | 0.0297 | 0.0289 | 0.0283 | 0.0268 |
| 0.0045 | 0.0131 | 0.0127 | 0.0131 | 0.013  | 0.0124 | 0.0126 | 0.0112 | 0.011  |
| 0.0181 | 0.0251 | 0.0289 | 0.0327 | 0.0374 | 0.0376 | 0.044  | 0.0458 | 0.047  |
| 0.0576 | 0.0782 | 0.0927 | 0.099  | 0.1106 | 0.1282 | 0.1511 | 0.1606 | 0.164  |
| 0.2232 | 0.191  | 0.1836 | 0.1934 | 0.1995 | 0.2087 | 0.2263 | 0.2477 | 0.2523 |
| 0.1151 | 0.1111 | 0.1292 | 0.1444 | 0.1565 | 0.1711 | 0.1738 | 0.1964 | 0.1861 |
| 0.0155 | 0.0177 | 0.0215 | 0.0245 | 0.0271 | 0.0292 | 0.0302 | 0.0347 | 0.0343 |
| 0.0281 | 0.0196 | 0.0159 | 0.0158 | 0.0156 | 0.015  | 0.0147 | 0.0144 | 0.0141 |
| 0.0435 | 0.0271 | 0.0228 | 0.021  | 0.0215 | 0.0227 | 0.0214 | 0.0225 | 0.0224 |
| 0.0347 | 0.023  | 0.0203 | 0.0198 | 0.0198 | 0.0191 | 0.019  | 0.0195 | 0.0186 |
| 0.0286 | 0.0191 | 0.017  | 0.0173 | 0.0176 | 0.0179 | 0.0181 | 0.0178 | 0.0179 |
| 0      | 0      | 0      | 0      | 0      | 0      | 0      | 0      | 0      |
| 0.051  | 0.0316 | 0.0262 | 0.0263 | 0.0267 | 0.0261 | 0.0264 | 0.0261 | 0.0252 |
| 0.1886 | 0.126  | 0.1035 | 0.103  | 0.1055 | 0.0999 | 0.0939 | 0.0878 | 0.0856 |
| 0.3179 | 0.1963 | 0.1558 | 0.1531 | 0.142  | 0.1468 | 0.1396 | 0.1502 | 0.1447 |
| 0.4446 | 0.25   | 0.2185 | 0.2089 | 0.2049 | 0.2059 | 0.2118 | 0.2181 | 0.1985 |

|        |        |        |        |        |        |        |        |        |
|--------|--------|--------|--------|--------|--------|--------|--------|--------|
| 0.4794 | 0.282  | 0.223  | 0.2198 | 0.207  | 0.2183 | 0.2063 | 0.2199 | 0.2322 |
| 0.279  | 0.1692 | 0.1323 | 0.1222 | 0.1279 | 0.1287 | 0.1238 | 0.1308 | 0.1245 |
| 0.4046 | 0.2467 | 0.1935 | 0.1899 | 0.1739 | 0.1772 | 0.1717 | 0.1673 | 0.1695 |
| 0.6225 | 0.3857 | 0.3246 | 0.3085 | 0.3009 | 0.2972 | 0.288  | 0.2769 | 0.2796 |
| 0.4205 | 0.2566 | 0.214  | 0.2057 | 0.2062 | 0.2045 | 0.1964 | 0.1906 | 0.1971 |
| 0.4881 | 0.3025 | 0.2402 | 0.2262 | 0.2099 | 0.2131 | 0.2067 | 0.2157 | 0.2249 |
| 0.7804 | 0.4783 | 0.3941 | 0.3831 | 0.3875 | 0.4138 | 0.3816 | 0.383  | 0.4092 |
| 1.0053 | 0.559  | 0.4434 | 0.4169 | 0.4059 | 0.4183 | 0.4117 | 0.4229 | 0.4654 |
| 1.0946 | 0.6643 | 0.5629 | 0.5517 | 0.5503 | 0.5078 | 0.4844 | 0.4818 | 0.4953 |
| 0.8205 | 0.493  | 0.4012 | 0.3822 | 0.3825 | 0.3893 | 0.3803 | 0.4081 | 0.4037 |
| 0.4665 | 0.2874 | 0.24   | 0.2301 | 0.2366 | 0.2326 | 0.2213 | 0.2278 | 0.224  |
| 0.1142 | 0.0705 | 0.0578 | 0.0534 | 0.0519 | 0.051  | 0.0518 | 0.0529 | 0.0542 |
| 0.0003 | 0.0003 | 0.0004 | 0.0004 | 0.0005 | 0.0006 | 0.0006 | 0.0007 | 0.0007 |
| 0.0464 | 0.03   | 0.0255 | 0.0243 | 0.0245 | 0.0267 | 0.0269 | 0.028  | 0.0273 |
| 0      | 0      | 0      | 0      | 0      | 0      | 0      | 0      | 0      |
| 0      | 0      | 0      | 0      | 0      | 0      | 0      | 0      | 0      |
| 0      | 0      | 0      | 0      | 0      | 0      | 0      | 0      | 0      |
| 0      | 0      | 0      | 0      | 0      | 0      | 0      | 0      | 0      |
| 0      | 0      | 0      | 0      | 0      | 0      | 0      | 0      | 0      |
| 0      | 0      | 0      | 0      | 0      | 0      | 0      | 0      | 0      |
| 0      | 0      | 0      | 0      | 0      | 0      | 0      | 0      | 0      |
| 0      | 0      | 0      | 0      | 0      | 0      | 0      | 0      | 0      |
| 0      | 0      | 0      | 0      | 0      | 0      | 0      | 0      | 0      |
| 0      | 0      | 0      | 0      | 0      | 0      | 0      | 0      | 0      |
| 0.0106 | 0.0086 | 0.0073 | 0.0068 | 0.0068 | 0.0063 | 0.0061 | 0.0059 | 0.0058 |
| 0.0038 | 0.0044 | 0.0053 | 0.0064 | 0.0071 | 0.0078 | 0.0093 | 0.0102 | 0.0099 |
| 0.0084 | 0.012  | 0.017  | 0.02   | 0.0204 | 0.024  | 0.0271 | 0.0276 | 0.0271 |
| 0.0055 | 0.0084 | 0.0092 | 0.0098 | 0.0104 | 0.0109 | 0.0118 | 0.0121 | 0.0118 |
| 0.0013 | 0.0023 | 0.0024 | 0.0026 | 0.0028 | 0.003  | 0.0034 | 0.0033 | 0.0033 |
| 0.0005 | 0.0014 | 0.0014 | 0.0013 | 0.0012 | 0.001  | 0.001  | 0.0009 | 0.0009 |
| 0.0103 | 0.0132 | 0.0148 | 0.0167 | 0.0179 | 0.0186 | 0.0193 | 0.0199 | 0.0196 |
| 0.0052 | 0.0096 | 0.0109 | 0.0115 | 0.0124 | 0.0125 | 0.0142 | 0.014  | 0.0142 |
| 0.053  | 0.0345 | 0.0297 | 0.0281 | 0.0288 | 0.0293 | 0.0277 | 0.028  | 0.0288 |
| 0.0141 | 0.0147 | 0.0162 | 0.0188 | 0.0207 | 0.0202 | 0.0244 | 0.0261 | 0.0267 |
| 0.0581 | 0.1126 | 0.1173 | 0.1192 | 0.1226 | 0.122  | 0.1271 | 0.1226 | 0.1245 |
| 0.2584 | 0.266  | 0.2421 | 0.2492 | 0.2535 | 0.2385 | 0.2382 | 0.2224 | 0.2235 |
| 0.2261 | 0.2165 | 0.2007 | 0.2025 | 0.2069 | 0.202  | 0.2045 | 0.2011 | 0.1979 |
| 0.0694 | 0.0972 | 0.1214 | 0.1427 | 0.1655 | 0.1809 | 0.1928 | 0.2071 | 0.1981 |
| 0.1548 | 0.1398 | 0.1636 | 0.1937 | 0.2036 | 0.2351 | 0.2511 | 0.2493 | 0.2431 |
| 0.1459 | 0.1485 | 0.1529 | 0.1591 | 0.1839 | 0.2132 | 0.2331 | 0.2499 | 0.2537 |
| 0.1774 | 0.1419 | 0.1512 | 0.1631 | 0.1718 | 0.1879 | 0.1992 | 0.2075 | 0.2018 |
| 0.0319 | 0.0235 | 0.0223 | 0.0233 | 0.0247 | 0.0269 | 0.0285 | 0.0299 | 0.0306 |
| 0.0022 | 0.0026 | 0.0028 | 0.0034 | 0.0038 | 0.0041 | 0.0044 | 0.0048 | 0.0045 |
| 0.0429 | 0.0242 | 0.0197 | 0.0178 | 0.0169 | 0.0177 | 0.0173 | 0.0173 | 0.0183 |

|        |        |        |        |        |        |        |        |        |
|--------|--------|--------|--------|--------|--------|--------|--------|--------|
| 0.12   | 0.0819 | 0.067  | 0.0631 | 0.0644 | 0.0645 | 0.0614 | 0.0614 | 0.0581 |
| 0.0644 | 0.0467 | 0.0385 | 0.0379 | 0.0353 | 0.0347 | 0.0364 | 0.0365 | 0.035  |
| 0.0497 | 0.028  | 0.0224 | 0.0224 | 0.0227 | 0.0221 | 0.0202 | 0.0196 | 0.0192 |
| 0.1405 | 0.0801 | 0.0682 | 0.0625 | 0.0637 | 0.0659 | 0.0618 | 0.0642 | 0.0612 |
| 0.1209 | 0.0681 | 0.0564 | 0.0556 | 0.0568 | 0.0574 | 0.0547 | 0.0529 | 0.0525 |
| 0.112  | 0.067  | 0.0552 | 0.0484 | 0.0491 | 0.0493 | 0.0443 | 0.0436 | 0.0435 |
| 0.0044 | 0.0106 | 0.0103 | 0.0106 | 0.0103 | 0.0097 | 0.01   | 0.0089 | 0.0084 |
| 0.0717 | 0.0447 | 0.039  | 0.0362 | 0.0368 | 0.0383 | 0.0374 | 0.036  | 0.0343 |
| 0.4636 | 0.2702 | 0.2094 | 0.2003 | 0.1995 | 0.2064 | 0.2027 | 0.197  | 0.2091 |
| 0.3316 | 0.1929 | 0.1483 | 0.1473 | 0.1398 | 0.1396 | 0.1315 | 0.1444 | 0.1418 |
| 0.1708 | 0.1056 | 0.0835 | 0.08   | 0.078  | 0.0798 | 0.0792 | 0.0827 | 0.084  |
| 0.6874 | 0.4199 | 0.3324 | 0.3114 | 0.334  | 0.3366 | 0.3301 | 0.3256 | 0.3375 |
| 0.8424 | 0.5346 | 0.4454 | 0.4408 | 0.4275 | 0.41   | 0.3943 | 0.4157 | 0.4156 |
| 0.8053 | 0.4691 | 0.3942 | 0.3427 | 0.3263 | 0.3214 | 0.3192 | 0.3217 | 0.3383 |
| 0.5117 | 0.2929 | 0.2476 | 0.2378 | 0.2306 | 0.2335 | 0.2342 | 0.2311 | 0.2302 |
| 0.3557 | 0.2142 | 0.1642 | 0.1593 | 0.157  | 0.1606 | 0.1567 | 0.1604 | 0.1761 |
| 0.4007 | 0.2364 | 0.1817 | 0.1647 | 0.1689 | 0.1725 | 0.155  | 0.1678 | 0.1608 |
| 0.2589 | 0.158  | 0.1223 | 0.12   | 0.119  | 0.1191 | 0.1178 | 0.1225 | 0.128  |
| 0      | 0      | 0      | 0      | 0      | 0      | 0      | 0      | 0      |
| 0.0279 | 0.0173 | 0.015  | 0.0148 | 0.0148 | 0.0153 | 0.0155 | 0.0162 | 0.0167 |
| 0      | 0      | 0      | 0      | 0      | 0      | 0      | 0      | 0      |
| 0      | 0      | 0      | 0      | 0      | 0      | 0      | 0      | 0      |
| 0      | 0      | 0      | 0      | 0      | 0      | 0      | 0      | 0      |
| 0      | 0      | 0      | 0      | 0      | 0      | 0      | 0      | 0      |
| 0      | 0      | 0      | 0      | 0      | 0      | 0      | 0      | 0      |
| 0      | 0      | 0      | 0      | 0      | 0      | 0      | 0      | 0      |
| 0      | 0      | 0      | 0      | 0      | 0      | 0      | 0      | 0      |
| 0      | 0      | 0      | 0      | 0      | 0      | 0      | 0      | 0      |
| 0      | 0      | 0      | 0      | 0      | 0      | 0      | 0      | 0      |
| 0      | 0      | 0      | 0      | 0      | 0      | 0      | 0      | 0      |
| 0.0085 | 0.0054 | 0.0043 | 0.004  | 0.0044 | 0.0048 | 0.0044 | 0.0045 | 0.0045 |
| 0.0245 | 0.0233 | 0.0236 | 0.0269 | 0.0286 | 0.0301 | 0.032  | 0.0329 | 0.0324 |
| 0.0209 | 0.0348 | 0.0396 | 0.049  | 0.0501 | 0.054  | 0.061  | 0.0608 | 0.0686 |
| 0.0173 | 0.0249 | 0.0282 | 0.0295 | 0.0299 | 0.0324 | 0.0355 | 0.036  | 0.035  |
| 0.004  | 0.0051 | 0.0061 | 0.0065 | 0.0066 | 0.0076 | 0.0088 | 0.0098 | 0.0097 |
| 0.0054 | 0.0141 | 0.0139 | 0.0143 | 0.0146 | 0.0129 | 0.0135 | 0.0122 | 0.0121 |
| 0.0429 | 0.0872 | 0.0919 | 0.0928 | 0.0979 | 0.096  | 0.1029 | 0.0986 | 0.0981 |
| 0.0701 | 0.1395 | 0.1492 | 0.1569 | 0.1626 | 0.1609 | 0.1663 | 0.1583 | 0.1512 |
| 0.0669 | 0.131  | 0.138  | 0.1417 | 0.1464 | 0.1483 | 0.1524 | 0.1473 | 0.1445 |
| 0.1303 | 0.1423 | 0.1432 | 0.1439 | 0.1505 | 0.154  | 0.1629 | 0.1642 | 0.1637 |
| 0.6496 | 0.4937 | 0.4322 | 0.42   | 0.4141 | 0.414  | 0.4107 | 0.4053 | 0.4128 |
| 1.302  | 0.9256 | 0.7897 | 0.7668 | 0.7842 | 0.7597 | 0.7314 | 0.6911 | 0.6922 |
| 1.0739 | 0.7391 | 0.6271 | 0.5939 | 0.602  | 0.5714 | 0.5708 | 0.5285 | 0.5163 |
| 0.224  | 0.2087 | 0.1987 | 0.2014 | 0.2057 | 0.21   | 0.2183 | 0.2182 | 0.2173 |

|        |        |        |        |        |        |        |        |        |
|--------|--------|--------|--------|--------|--------|--------|--------|--------|
| 0.0803 | 0.1088 | 0.1356 | 0.1464 | 0.1525 | 0.1688 | 0.1952 | 0.1969 | 0.1943 |
| 0.1568 | 0.163  | 0.1774 | 0.2004 | 0.2198 | 0.2361 | 0.2612 | 0.2715 | 0.2565 |
| 0.1392 | 0.1251 | 0.1351 | 0.1487 | 0.1623 | 0.1801 | 0.1931 | 0.2021 | 0.2027 |
| 0.0764 | 0.0633 | 0.06   | 0.0615 | 0.0639 | 0.0653 | 0.0677 | 0.0685 | 0.0675 |
| 0.0121 | 0.0305 | 0.0296 | 0.0303 | 0.0296 | 0.0281 | 0.0287 | 0.0255 | 0.0231 |
| 0.0073 | 0.02   | 0.0182 | 0.0178 | 0.0168 | 0.0136 | 0.0129 | 0.0104 | 0.0095 |
| 0.0607 | 0.0404 | 0.0362 | 0.0338 | 0.0335 | 0.0323 | 0.0318 | 0.0313 | 0.0284 |
| 0.1004 | 0.0852 | 0.0722 | 0.0683 | 0.0669 | 0.0664 | 0.0647 | 0.0625 | 0.0603 |
| 0.0195 | 0.0416 | 0.0395 | 0.0397 | 0.0395 | 0.0345 | 0.0328 | 0.0283 | 0.0274 |
| 0.0079 | 0.0212 | 0.0205 | 0.0205 | 0.0203 | 0.018  | 0.0186 | 0.0173 | 0.0167 |
| 0.0774 | 0.0615 | 0.0551 | 0.054  | 0.0542 | 0.0533 | 0.0547 | 0.0541 | 0.0521 |
| 0      | 0      | 0      | 0      | 0      | 0      | 0      | 0      | 0      |
| 0      | 0      | 0      | 0      | 0      | 0      | 0      | 0      | 0      |
| 0.0841 | 0.0536 | 0.0433 | 0.0428 | 0.0419 | 0.04   | 0.0381 | 0.0399 | 0.04   |
| 0.2072 | 0.1154 | 0.091  | 0.0849 | 0.0891 | 0.0913 | 0.0851 | 0.095  | 0.098  |
| 0.1087 | 0.0697 | 0.0563 | 0.0539 | 0.0544 | 0.0535 | 0.0487 | 0.051  | 0.0501 |
| 0.0587 | 0.0324 | 0.0252 | 0.0254 | 0.026  | 0.0259 | 0.0233 | 0.0246 | 0.0239 |
| 0.3002 | 0.1881 | 0.1508 | 0.1499 | 0.1629 | 0.1661 | 0.1635 | 0.1573 | 0.1553 |
| 0.7775 | 0.4622 | 0.3593 | 0.3702 | 0.3736 | 0.3777 | 0.3796 | 0.391  | 0.4044 |
| 0.7832 | 0.4625 | 0.3687 | 0.3582 | 0.3518 | 0.3608 | 0.348  | 0.3567 | 0.3695 |
| 0.574  | 0.3334 | 0.2769 | 0.2553 | 0.2624 | 0.2581 | 0.2441 | 0.2417 | 0.233  |
| 0.6351 | 0.3679 | 0.2892 | 0.2954 | 0.2875 | 0.2749 | 0.2787 | 0.2974 | 0.2855 |
| 1.0308 | 0.6335 | 0.5264 | 0.5073 | 0.5271 | 0.5266 | 0.5165 | 0.5195 | 0.5021 |
| 0.6958 | 0.416  | 0.3366 | 0.3032 | 0.2894 | 0.3368 | 0.3368 | 0.335  | 0.3372 |
| 0.1685 | 0.0967 | 0.0751 | 0.0737 | 0.073  | 0.0687 | 0.0669 | 0.0661 | 0.0722 |
| 0      | 0      | 0      | 0      | 0      | 0      | 0      | 0      | 0      |
| 0      | 0      | 0      | 0      | 0      | 0      | 0      | 0      | 0      |
| 0      | 0      | 0      | 0      | 0      | 0      | 0      | 0      | 0      |
| 0      | 0      | 0      | 0      | 0      | 0      | 0      | 0      | 0      |
| 0      | 0      | 0      | 0      | 0      | 0      | 0      | 0      | 0      |
| 0      | 0      | 0      | 0      | 0      | 0      | 0      | 0      | 0      |
| 0      | 0      | 0      | 0      | 0      | 0      | 0      | 0      | 0      |
| 0      | 0      | 0      | 0      | 0      | 0      | 0      | 0      | 0      |
| 0      | 0      | 0      | 0      | 0      | 0      | 0      | 0      | 0      |
| 0      | 0      | 0      | 0      | 0      | 0      | 0      | 0      | 0      |
| 0      | 0      | 0      | 0      | 0      | 0      | 0      | 0      | 0      |
| 0.0106 | 0.0079 | 0.0078 | 0.0079 | 0.0086 | 0.0093 | 0.01   | 0.0107 | 0.0102 |
| 0.0101 | 0.0066 | 0.006  | 0.0061 | 0.0062 | 0.0065 | 0.0065 | 0.0067 | 0.0064 |
| 0.0207 | 0.02   | 0.0225 | 0.0233 | 0.0247 | 0.0258 | 0.0283 | 0.0309 | 0.0307 |
| 0      | 0      | 0      | 0      | 0      | 0      | 0      | 0      | 0      |
| 0.0017 | 0.0023 | 0.0033 | 0.0041 | 0.0049 | 0.0058 | 0.0065 | 0.0069 | 0.0069 |
| 0.0205 | 0.0508 | 0.0525 | 0.0546 | 0.0547 | 0.051  | 0.0531 | 0.0487 | 0.0474 |
| 0.0532 | 0.1419 | 0.1424 | 0.145  | 0.1422 | 0.1413 | 0.1406 | 0.1332 | 0.1275 |
| 0.085  | 0.2196 | 0.2148 | 0.2145 | 0.2106 | 0.1933 | 0.197  | 0.1659 | 0.1665 |







|        |        |        |        |        |        |        |        |        |
|--------|--------|--------|--------|--------|--------|--------|--------|--------|
| 0      | 0      | 0      | 0      | 0      | 0      | 0      | 0      | 0      |
| 0      | 0      | 0      | 0      | 0      | 0      | 0      | 0      | 0      |
| 0      | 0      | 0      | 0      | 0      | 0      | 0      | 0      | 0      |
| 0      | 0      | 0      | 0      | 0      | 0      | 0      | 0      | 0      |
| 0      | 0      | 0      | 0      | 0      | 0      | 0      | 0      | 0      |
| 0      | 0      | 0      | 0      | 0      | 0      | 0      | 0      | 0      |
| 0.0087 | 0.0051 | 0.0042 | 0.004  | 0.0039 | 0.0038 | 0.0037 | 0.0037 | 0.0035 |
| 0.0188 | 0.0131 | 0.0107 | 0.0105 | 0.0103 | 0.0105 | 0.0104 | 0.01   | 0.0096 |
| 0.0347 | 0.0367 | 0.0345 | 0.0342 | 0.0345 | 0.033  | 0.0337 | 0.0326 | 0.0319 |
| 0.0808 | 0.1036 | 0.1081 | 0.1088 | 0.1152 | 0.1186 | 0.1276 | 0.1279 | 0.1279 |
| 0.0919 | 0.1108 | 0.1121 | 0.1207 | 0.1314 | 0.1383 | 0.1477 | 0.1488 | 0.144  |
| 0.0937 | 0.0954 | 0.1113 | 0.1234 | 0.1279 | 0.139  | 0.1548 | 0.1684 | 0.1644 |
| 0.9332 | 0.6129 | 0.5263 | 0.5207 | 0.5606 | 0.5407 | 0.5376 | 0.5314 | 0.5364 |
| 0.7378 | 0.5891 | 0.4951 | 0.4838 | 0.4624 | 0.4749 | 0.4864 | 0.4847 | 0.4714 |
| 0.1854 | 0.2459 | 0.2304 | 0.2299 | 0.2316 | 0.2149 | 0.2182 | 0.2071 | 0.1946 |
| 0.0766 | 0.1549 | 0.1665 | 0.1685 | 0.1734 | 0.1713 | 0.186  | 0.1762 | 0.1658 |
| 0.0986 | 0.159  | 0.1651 | 0.1724 | 0.1775 | 0.1751 | 0.1848 | 0.1821 | 0.1777 |
| 0.1816 | 0.2009 | 0.1964 | 0.2023 | 0.2086 | 0.2094 | 0.2189 | 0.2157 | 0.2132 |
| 0.2143 | 0.2308 | 0.2207 | 0.2234 | 0.2283 | 0.2262 | 0.2296 | 0.2227 | 0.22   |
| 0.1129 | 0.1921 | 0.1867 | 0.1882 | 0.1922 | 0.1874 | 0.1881 | 0.17   | 0.1697 |
| 0.1242 | 0.3072 | 0.2951 | 0.2995 | 0.2904 | 0.2765 | 0.2783 | 0.2376 | 0.2224 |
| 0.2152 | 0.3729 | 0.3561 | 0.3443 | 0.3377 | 0.313  | 0.3086 | 0.2679 | 0.2603 |
| 0.3437 | 0.4591 | 0.4232 | 0.4133 | 0.4103 | 0.3574 | 0.3562 | 0.3126 | 0.3197 |
| 0.3539 | 0.4316 | 0.3905 | 0.3761 | 0.3853 | 0.3526 | 0.3346 | 0.3053 | 0.297  |
| 0.2841 | 0.3943 | 0.353  | 0.3486 | 0.3459 | 0.3203 | 0.3093 | 0.2626 | 0.274  |
| 0.1174 | 0.2538 | 0.24   | 0.2491 | 0.2492 | 0.2281 | 0.224  | 0.1847 | 0.1765 |
| 0.0957 | 0.171  | 0.1728 | 0.1723 | 0.1745 | 0.1679 | 0.1719 | 0.1575 | 0.1523 |
| 0.2272 | 0.2371 | 0.2146 | 0.2062 | 0.2068 | 0.2017 | 0.2064 | 0.19   | 0.1901 |
| 1.2633 | 0.8855 | 0.7454 | 0.7383 | 0.6976 | 0.6504 | 0.6378 | 0.6307 | 0.5972 |
| 0.9057 | 0.7567 | 0.6666 | 0.638  | 0.6334 | 0.6098 | 0.6123 | 0.6073 | 0.612  |
| 0.3577 | 0.4447 | 0.4102 | 0.3917 | 0.3952 | 0.3447 | 0.338  | 0.301  | 0.2879 |
| 0.1926 | 0.3634 | 0.3462 | 0.3366 | 0.3414 | 0.3184 | 0.3043 | 0.2511 | 0.2461 |
| 0.2508 | 0.3163 | 0.2987 | 0.2972 | 0.2899 | 0.2802 | 0.285  | 0.2643 | 0.2536 |
| 0.0466 | 0.0715 | 0.0782 | 0.0856 | 0.0992 | 0.1109 | 0.1299 | 0.1339 | 0.1327 |
| 0.0804 | 0.0868 | 0.0939 | 0.1115 | 0.119  | 0.1195 | 0.1337 | 0.1364 | 0.1277 |
| 0.0555 | 0.044  | 0.0426 | 0.044  | 0.0454 | 0.0473 | 0.0499 | 0.051  | 0.0503 |
| 0.2202 | 0.1352 | 0.1174 | 0.1136 | 0.1205 | 0.1267 | 0.1304 | 0.1367 | 0.1278 |
| 0.008  | 0.0048 | 0.0042 | 0.0039 | 0.004  | 0.0042 | 0.0041 | 0.0043 | 0.0041 |
| 0.0276 | 0.0169 | 0.0132 | 0.0115 | 0.0121 | 0.0128 | 0.0116 | 0.0127 | 0.0122 |
| 0.3396 | 0.2101 | 0.1722 | 0.151  | 0.1465 | 0.1435 | 0.1363 | 0.1427 | 0.145  |
| 0.5387 | 0.3266 | 0.2877 | 0.256  | 0.2502 | 0.2853 | 0.2992 | 0.2781 | 0.2556 |
| 0.5254 | 0.3072 | 0.2389 | 0.2238 | 0.2377 | 0.2265 | 0.2124 | 0.2029 | 0.1938 |
| 0.272  | 0.165  | 0.1309 | 0.1234 | 0.1316 | 0.1346 | 0.1311 | 0.1337 | 0.143  |
| 0.042  | 0.0258 | 0.0205 | 0.0187 | 0.0184 | 0.0182 | 0.0167 | 0.018  | 0.0186 |

|        |        |        |        |        |        |        |        |        |   |
|--------|--------|--------|--------|--------|--------|--------|--------|--------|---|
| 0      | 0      | 0      | 0      | 0      | 0      | 0      | 0      | 0      | 0 |
| 0      | 0      | 0      | 0      | 0      | 0      | 0      | 0      | 0      | 0 |
| 0      | 0      | 0      | 0      | 0      | 0      | 0      | 0      | 0      | 0 |
| 0      | 0      | 0      | 0      | 0      | 0      | 0      | 0      | 0      | 0 |
| 0      | 0      | 0      | 0      | 0      | 0      | 0      | 0      | 0      | 0 |
| 0      | 0      | 0      | 0      | 0      | 0      | 0      | 0      | 0      | 0 |
| 0      | 0      | 0      | 0      | 0      | 0      | 0      | 0      | 0      | 0 |
| 0      | 0      | 0      | 0      | 0      | 0      | 0      | 0      | 0      | 0 |
| 0      | 0      | 0      | 0      | 0      | 0      | 0      | 0      | 0      | 0 |
| 0      | 0      | 0      | 0      | 0      | 0      | 0      | 0      | 0      | 0 |
| 0.0031 | 0.0046 | 0.0059 | 0.0064 | 0.0072 | 0.0075 | 0.0081 | 0.0083 | 0.008  |   |
| 0.0007 | 0.0025 | 0.0024 | 0.0024 | 0.0023 | 0.0022 | 0.0022 | 0.0017 | 0.0016 |   |
| 0.0097 | 0.0068 | 0.006  | 0.0055 | 0.0055 | 0.0053 | 0.0051 | 0.0051 | 0.005  |   |
| 0.02   | 0.0138 | 0.013  | 0.013  | 0.0138 | 0.0142 | 0.0147 | 0.0157 | 0.0155 |   |
| 0.0418 | 0.038  | 0.0342 | 0.034  | 0.0344 | 0.0333 | 0.0347 | 0.034  | 0.0344 |   |
| 0.0975 | 0.1116 | 0.1132 | 0.1177 | 0.1256 | 0.1318 | 0.1388 | 0.1392 | 0.1377 |   |
| 0.1053 | 0.1195 | 0.122  | 0.1292 | 0.1359 | 0.135  | 0.1458 | 0.1478 | 0.1489 |   |
| 0.1084 | 0.1162 | 0.1239 | 0.1308 | 0.1334 | 0.1512 | 0.168  | 0.1736 | 0.1742 |   |
| 0.2893 | 0.2479 | 0.2258 | 0.2189 | 0.2269 | 0.2209 | 0.2244 | 0.2183 | 0.2165 |   |
| 0.3999 | 0.3397 | 0.3071 | 0.2988 | 0.2794 | 0.2662 | 0.261  | 0.246  | 0.2368 |   |
| 0.2483 | 0.319  | 0.2981 | 0.3097 | 0.3013 | 0.2811 | 0.2677 | 0.2357 | 0.2243 |   |
| 0.1201 | 0.234  | 0.2356 | 0.2348 | 0.2416 | 0.2255 | 0.2365 | 0.2123 | 0.2006 |   |
| 0.1194 | 0.1762 | 0.1779 | 0.1829 | 0.1837 | 0.1776 | 0.185  | 0.172  | 0.1724 |   |
| 0.0612 | 0.0872 | 0.0929 | 0.1036 | 0.1137 | 0.1213 | 0.1265 | 0.1303 | 0.126  |   |
| 0.0843 | 0.0968 | 0.1029 | 0.1069 | 0.1146 | 0.1173 | 0.1212 | 0.1265 | 0.1257 |   |
| 0.105  | 0.1488 | 0.1521 | 0.1614 | 0.1693 | 0.1713 | 0.1802 | 0.1793 | 0.1746 |   |
| 0.0673 | 0.1374 | 0.1417 | 0.1462 | 0.1522 | 0.1457 | 0.152  | 0.1443 | 0.143  |   |
| 0.1579 | 0.2968 | 0.2835 | 0.2679 | 0.2695 | 0.2213 | 0.2288 | 0.1818 | 0.1776 |   |
| 0.0806 | 0.2605 | 0.2563 | 0.2522 | 0.2394 | 0.2159 | 0.2178 | 0.1888 | 0.197  |   |
| 0.165  | 0.3458 | 0.3254 | 0.3209 | 0.3161 | 0.2779 | 0.2593 | 0.2234 | 0.2179 |   |
| 0.3148 | 0.4419 | 0.418  | 0.4016 | 0.3808 | 0.3502 | 0.3424 | 0.298  | 0.2778 |   |
| 0.3685 | 0.3718 | 0.3241 | 0.3254 | 0.3068 | 0.2812 | 0.2741 | 0.2432 | 0.2377 |   |
| 0.2591 | 0.2629 | 0.2441 | 0.2447 | 0.2403 | 0.233  | 0.2389 | 0.2259 | 0.2214 |   |
| 0.0507 | 0.2131 | 0.2112 | 0.2243 | 0.2274 | 0.2057 | 0.2123 | 0.1934 | 0.1909 |   |
| 0.2959 | 0.3881 | 0.3578 | 0.3625 | 0.3677 | 0.3153 | 0.3125 | 0.2637 | 0.2625 |   |
| 0.4622 | 0.4626 | 0.4006 | 0.3802 | 0.3777 | 0.3546 | 0.3617 | 0.3355 | 0.3309 |   |
| 0.4683 | 0.4044 | 0.3642 | 0.3554 | 0.354  | 0.3392 | 0.3194 | 0.3068 | 0.3004 |   |
| 0.6119 | 0.5953 | 0.5255 | 0.5012 | 0.5023 | 0.459  | 0.4201 | 0.3981 | 0.3719 |   |
| 0.336  | 0.4114 | 0.3836 | 0.3766 | 0.3773 | 0.3402 | 0.3355 | 0.2987 | 0.3024 |   |
| 0.0582 | 0.1122 | 0.1272 | 0.1366 | 0.145  | 0.1484 | 0.1649 | 0.1561 | 0.1544 |   |
| 0.1535 | 0.1458 | 0.1528 | 0.1708 | 0.1845 | 0.2057 | 0.2198 | 0.2266 | 0.228  |   |
| 0.0738 | 0.0825 | 0.0941 | 0.1029 | 0.1155 | 0.1202 | 0.1304 | 0.1468 | 0.1463 |   |
| 0.1142 | 0.0865 | 0.0865 | 0.0888 | 0.0915 | 0.1024 | 0.1096 | 0.1172 | 0.1164 |   |
| 0.0067 | 0.0094 | 0.0126 | 0.0142 | 0.0145 | 0.0166 | 0.0176 | 0.0187 | 0.0188 |   |

|        |        |        |        |        |        |        |        |        |
|--------|--------|--------|--------|--------|--------|--------|--------|--------|
| 0.0443 | 0.0257 | 0.0219 | 0.0212 | 0.021  | 0.0214 | 0.022  | 0.0212 | 0.0193 |
| 0.1988 | 0.1164 | 0.0935 | 0.0923 | 0.0909 | 0.0951 | 0.0975 | 0.0985 | 0.0984 |
| 0.1738 | 0.1058 | 0.0829 | 0.084  | 0.0844 | 0.0863 | 0.0817 | 0.0835 | 0.0818 |
| 0.1273 | 0.0726 | 0.0571 | 0.0554 | 0.0556 | 0.0557 | 0.058  | 0.0594 | 0.0598 |
| 0.1051 | 0.0655 | 0.0523 | 0.0493 | 0.0465 | 0.0487 | 0.047  | 0.0497 | 0.0464 |
| 0      | 0      | 0      | 0      | 0      | 0      | 0      | 0      | 0      |
| 0      | 0      | 0      | 0      | 0      | 0      | 0      | 0      | 0      |
| 0      | 0      | 0      | 0      | 0      | 0      | 0      | 0      | 0      |
| 0      | 0      | 0      | 0      | 0      | 0      | 0      | 0      | 0      |
| 0      | 0      | 0      | 0      | 0      | 0      | 0      | 0      | 0      |
| 0      | 0      | 0      | 0      | 0      | 0      | 0      | 0      | 0      |
| 0      | 0      | 0      | 0      | 0      | 0      | 0      | 0      | 0      |
| 0      | 0      | 0      | 0      | 0      | 0      | 0      | 0      | 0      |
| 0      | 0      | 0      | 0      | 0      | 0      | 0      | 0      | 0      |
| 0      | 0      | 0      | 0      | 0      | 0      | 0      | 0      | 0      |
| 0      | 0      | 0      | 0      | 0      | 0      | 0      | 0      | 0      |
| 0.0286 | 0.0259 | 0.0225 | 0.0221 | 0.0215 | 0.0205 | 0.0196 | 0.0195 | 0.0186 |
| 0.0392 | 0.0263 | 0.0235 | 0.0231 | 0.0246 | 0.0257 | 0.0263 | 0.0273 | 0.0275 |
| 0.0384 | 0.031  | 0.0255 | 0.0241 | 0.0228 | 0.0216 | 0.0213 | 0.0204 | 0.0188 |
| 0.0018 | 0.003  | 0.0032 | 0.0034 | 0.0035 | 0.0035 | 0.0038 | 0.0039 | 0.0036 |
| 0.0145 | 0.0232 | 0.0242 | 0.0276 | 0.0298 | 0.03   | 0.0317 | 0.032  | 0.0317 |
| 0.1237 | 0.1416 | 0.1447 | 0.1519 | 0.1591 | 0.1588 | 0.1648 | 0.1655 | 0.1672 |
| 0.1295 | 0.1643 | 0.1623 | 0.1686 | 0.176  | 0.1733 | 0.18   | 0.176  | 0.1712 |
| 0.0638 | 0.1543 | 0.1581 | 0.1665 | 0.166  | 0.1549 | 0.1665 | 0.1534 | 0.1576 |
| 0.1414 | 0.241  | 0.2401 | 0.238  | 0.2356 | 0.2164 | 0.2177 | 0.1954 | 0.1977 |
| 0.219  | 0.2905 | 0.2555 | 0.2567 | 0.2374 | 0.2252 | 0.229  | 0.2146 | 0.2138 |
| 0.2894 | 0.341  | 0.3055 | 0.3074 | 0.3129 | 0.2846 | 0.2888 | 0.2619 | 0.2515 |
| 0.1048 | 0.2055 | 0.209  | 0.2072 | 0.2059 | 0.1924 | 0.1954 | 0.1789 | 0.1779 |
| 0.0717 | 0.1336 | 0.1409 | 0.1534 | 0.1603 | 0.1647 | 0.1733 | 0.1701 | 0.1724 |
| 0.334  | 0.2887 | 0.2606 | 0.2631 | 0.2706 | 0.2742 | 0.2776 | 0.2736 | 0.2693 |
| 0.3532 | 0.3062 | 0.2699 | 0.2587 | 0.2596 | 0.2501 | 0.2504 | 0.248  | 0.2504 |
| 0.0526 | 0.111  | 0.1135 | 0.1109 | 0.1151 | 0.1133 | 0.1234 | 0.1165 | 0.1144 |
| 0.0596 | 0.1305 | 0.1368 | 0.1482 | 0.1539 | 0.1521 | 0.1637 | 0.1573 | 0.1597 |
| 0.107  | 0.2143 | 0.2045 | 0.2073 | 0.1999 | 0.1787 | 0.1792 | 0.1676 | 0.1627 |
| 0.1323 | 0.2994 | 0.2797 | 0.2795 | 0.2708 | 0.2468 | 0.2369 | 0.2056 | 0.1996 |
| 0.1519 | 0.3081 | 0.2823 | 0.3004 | 0.2933 | 0.267  | 0.2501 | 0.2188 | 0.2195 |
| 0.2408 | 0.3544 | 0.3275 | 0.3263 | 0.3257 | 0.3078 | 0.308  | 0.251  | 0.2597 |
| 0.2041 | 0.3134 | 0.2893 | 0.287  | 0.2967 | 0.2705 | 0.2743 | 0.226  | 0.2252 |
| 0.1446 | 0.2586 | 0.2363 | 0.2296 | 0.2348 | 0.2167 | 0.2251 | 0.1991 | 0.1913 |
| 0.2154 | 0.358  | 0.335  | 0.3276 | 0.3289 | 0.2869 | 0.2864 | 0.2592 | 0.2546 |
| 0.1248 | 0.3396 | 0.3303 | 0.3202 | 0.3312 | 0.2812 | 0.266  | 0.2189 | 0.211  |
| 0.1087 | 0.2761 | 0.2413 | 0.2403 | 0.2278 | 0.1888 | 0.1918 | 0.1533 | 0.1514 |
| 0.2972 | 0.3537 | 0.3209 | 0.3194 | 0.3204 | 0.3044 | 0.3003 | 0.2662 | 0.2505 |
| 0.4184 | 0.447  | 0.4126 | 0.4069 | 0.4001 | 0.3557 | 0.3532 | 0.307  | 0.3132 |

|        |        |        |        |        |        |        |        |        |
|--------|--------|--------|--------|--------|--------|--------|--------|--------|
| 0.1611 | 0.3092 | 0.283  | 0.2677 | 0.294  | 0.257  | 0.2532 | 0.2102 | 0.1894 |
| 0.0708 | 0.2139 | 0.2143 | 0.2116 | 0.2148 | 0.1941 | 0.1907 | 0.1545 | 0.1554 |
| 0.1092 | 0.1877 | 0.1912 | 0.1971 | 0.1961 | 0.1871 | 0.1933 | 0.1788 | 0.1738 |
| 0.077  | 0.1975 | 0.2018 | 0.21   | 0.2069 | 0.1969 | 0.2109 | 0.1974 | 0.1905 |
| 0.0599 | 0.1216 | 0.1294 | 0.1357 | 0.137  | 0.1357 | 0.1461 | 0.1478 | 0.1477 |
| 0.0425 | 0.031  | 0.0286 | 0.03   | 0.0317 | 0.0336 | 0.0365 | 0.0386 | 0.0385 |
| 0.1808 | 0.1101 | 0.0872 | 0.0833 | 0.0839 | 0.0874 | 0.092  | 0.0939 | 0.0933 |
| 0.2514 | 0.1605 | 0.1274 | 0.1246 | 0.1307 | 0.135  | 0.1379 | 0.1411 | 0.1361 |
| 0.1869 | 0.1134 | 0.0939 | 0.0871 | 0.0919 | 0.095  | 0.0962 | 0.0958 | 0.0959 |
| 0.0664 | 0.0395 | 0.0313 | 0.029  | 0.0302 | 0.0309 | 0.0296 | 0.0315 | 0.0302 |
| 0.0147 | 0.0209 | 0.019  | 0.0194 | 0.0188 | 0.0176 | 0.0182 | 0.0154 | 0.0142 |
| 0.0339 | 0.0212 | 0.0173 | 0.0167 | 0.0173 | 0.0173 | 0.0166 | 0.0176 | 0.0165 |
| 0.0087 | 0.0053 | 0.0044 | 0.0039 | 0.0037 | 0.0038 | 0.0039 | 0.0039 | 0.0041 |
| 0.0084 | 0.0051 | 0.0041 | 0.0039 | 0.0039 | 0.004  | 0.0039 | 0.0041 | 0.004  |
| 0      | 0      | 0      | 0      | 0      | 0      | 0      | 0      | 0      |
| 0      | 0      | 0      | 0      | 0      | 0      | 0      | 0      | 0      |
| 0      | 0      | 0      | 0      | 0      | 0      | 0      | 0      | 0      |
| 0      | 0      | 0      | 0      | 0      | 0      | 0      | 0      | 0      |
| 0      | 0      | 0      | 0      | 0      | 0      | 0      | 0      | 0      |
| 0      | 0      | 0      | 0      | 0      | 0      | 0      | 0      | 0      |
| 0      | 0      | 0      | 0      | 0      | 0      | 0      | 0      | 0      |
| 0      | 0      | 0      | 0      | 0      | 0      | 0      | 0      | 0      |
| 0.0553 | 0.037  | 0.0307 | 0.0279 | 0.0283 | 0.0281 | 0.0271 | 0.0262 | 0.0261 |
| 0.0281 | 0.0182 | 0.0147 | 0.0142 | 0.014  | 0.0144 | 0.0137 | 0.0133 | 0.013  |
| 0.0515 | 0.0342 | 0.0303 | 0.0289 | 0.0285 | 0.0279 | 0.0271 | 0.0276 | 0.0264 |
| 0.0833 | 0.0609 | 0.0553 | 0.0559 | 0.0579 | 0.059  | 0.0608 | 0.0627 | 0.063  |
| 0.0698 | 0.0888 | 0.0949 | 0.1012 | 0.1036 | 0.1092 | 0.1226 | 0.1232 | 0.1239 |
| 0.0843 | 0.1607 | 0.1608 | 0.1666 | 0.1693 | 0.169  | 0.1784 | 0.1628 | 0.1604 |
| 0.1323 | 0.2399 | 0.2292 | 0.225  | 0.2249 | 0.2052 | 0.2077 | 0.1876 | 0.1835 |
| 0.1504 | 0.2587 | 0.2501 | 0.2459 | 0.2438 | 0.2259 | 0.2288 | 0.1967 | 0.198  |
| 0.0755 | 0.2269 | 0.2208 | 0.2184 | 0.2101 | 0.1927 | 0.1915 | 0.1653 | 0.1713 |
| 0.2776 | 0.379  | 0.3466 | 0.343  | 0.3372 | 0.324  | 0.3202 | 0.2802 | 0.2811 |
| 0.1962 | 0.3319 | 0.3063 | 0.2821 | 0.2874 | 0.249  | 0.2482 | 0.2129 | 0.2212 |
| 0.1524 | 0.2466 | 0.2411 | 0.2409 | 0.2468 | 0.2272 | 0.2279 | 0.1935 | 0.1861 |
| 0.0938 | 0.1482 | 0.1489 | 0.1551 | 0.1545 | 0.1538 | 0.1599 | 0.1497 | 0.1488 |
| 0.3944 | 0.3973 | 0.3541 | 0.3524 | 0.3656 | 0.3428 | 0.3501 | 0.3311 | 0.3231 |
| 0.8658 | 0.7348 | 0.6527 | 0.6548 | 0.6448 | 0.5835 | 0.5584 | 0.5276 | 0.5299 |
| 0.7133 | 0.642  | 0.5659 | 0.517  | 0.5184 | 0.4927 | 0.5011 | 0.4625 | 0.4445 |
| 0.3318 | 0.2785 | 0.2514 | 0.2512 | 0.2567 | 0.2561 | 0.2582 | 0.2561 | 0.2536 |
| 0.0734 | 0.2269 | 0.2205 | 0.2212 | 0.2255 | 0.2101 | 0.2194 | 0.1844 | 0.1714 |
| 0.12   | 0.3133 | 0.2854 | 0.2813 | 0.275  | 0.2388 | 0.253  | 0.2157 | 0.1957 |
| 0.3294 | 0.45   | 0.416  | 0.4118 | 0.4074 | 0.3597 | 0.3481 | 0.297  | 0.2743 |
| 0.1978 | 0.3435 | 0.313  | 0.3056 | 0.3147 | 0.2918 | 0.283  | 0.2342 | 0.2278 |
| 0.1102 | 0.2803 | 0.2764 | 0.2568 | 0.2615 | 0.2337 | 0.2225 | 0.1801 | 0.1782 |

|        |        |        |        |        |        |        |        |        |
|--------|--------|--------|--------|--------|--------|--------|--------|--------|
| 0.1571 | 0.3144 | 0.294  | 0.3147 | 0.3173 | 0.2866 | 0.2682 | 0.2286 | 0.2236 |
| 0.0943 | 0.282  | 0.2729 | 0.2801 | 0.2719 | 0.2502 | 0.2446 | 0.2013 | 0.1788 |
| 0.0806 | 0.2811 | 0.2657 | 0.2559 | 0.2447 | 0.2222 | 0.217  | 0.1642 | 0.1516 |
| 0.1054 | 0.2914 | 0.2619 | 0.2521 | 0.2553 | 0.2275 | 0.2384 | 0.1969 | 0.1903 |
| 0.1975 | 0.3285 | 0.3109 | 0.3055 | 0.3127 | 0.2831 | 0.2683 | 0.2408 | 0.2344 |
| 0.2554 | 0.3321 | 0.3022 | 0.2973 | 0.297  | 0.2786 | 0.2829 | 0.2565 | 0.2657 |
| 0.1193 | 0.2595 | 0.2375 | 0.2402 | 0.2413 | 0.231  | 0.2138 | 0.1804 | 0.171  |
| 0.1142 | 0.2858 | 0.2698 | 0.2704 | 0.288  | 0.248  | 0.2412 | 0.2044 | 0.2053 |
| 0.282  | 0.3998 | 0.3679 | 0.3308 | 0.3338 | 0.3144 | 0.3163 | 0.2758 | 0.2673 |
| 0.2835 | 0.4022 | 0.3677 | 0.3711 | 0.3922 | 0.3391 | 0.351  | 0.3057 | 0.2919 |
| 0.1288 | 0.2451 | 0.2359 | 0.2309 | 0.2368 | 0.2117 | 0.2161 | 0.1854 | 0.187  |
| 0.079  | 0.1648 | 0.1722 | 0.1731 | 0.1767 | 0.1667 | 0.1738 | 0.16   | 0.1533 |
| 0.0819 | 0.1137 | 0.1271 | 0.1388 | 0.1477 | 0.1539 | 0.1586 | 0.1687 | 0.1727 |
| 0.0893 | 0.0812 | 0.0816 | 0.0858 | 0.0919 | 0.1029 | 0.1135 | 0.1249 | 0.124  |
| 0.0856 | 0.0688 | 0.0648 | 0.0662 | 0.0697 | 0.0725 | 0.075  | 0.0768 | 0.0758 |
| 0.0507 | 0.0453 | 0.0396 | 0.039  | 0.0388 | 0.038  | 0.038  | 0.0359 | 0.0357 |
| 0.0595 | 0.0404 | 0.0361 | 0.0355 | 0.0367 | 0.0387 | 0.0395 | 0.0417 | 0.0409 |
| 0.0837 | 0.0453 | 0.0412 | 0.0392 | 0.0393 | 0.0378 | 0.0357 | 0.036  | 0.0396 |
| 0.0086 | 0.0053 | 0.0043 | 0.004  | 0.0039 | 0.0039 | 0.0037 | 0.0041 | 0.004  |
| 0.0079 | 0.0047 | 0.0035 | 0.0031 | 0.0031 | 0.0033 | 0.0032 | 0.0035 | 0.0033 |
| 0      | 0      | 0      | 0      | 0      | 0      | 0      | 0      | 0      |
| 0      | 0      | 0      | 0      | 0      | 0      | 0      | 0      | 0      |
| 0      | 0      | 0      | 0      | 0      | 0      | 0      | 0      | 0      |
| 0      | 0      | 0      | 0      | 0      | 0      | 0      | 0      | 0      |
| 0      | 0      | 0      | 0      | 0      | 0      | 0      | 0      | 0      |
| 0      | 0      | 0      | 0      | 0      | 0      | 0      | 0      | 0      |
| 0      | 0      | 0      | 0      | 0      | 0      | 0      | 0      | 0      |
| 0      | 0      | 0      | 0      | 0      | 0      | 0      | 0      | 0      |
| 0.0428 | 0.0232 | 0.0195 | 0.0186 | 0.0204 | 0.0207 | 0.0207 | 0.0216 | 0.0219 |
| 0      | 0      | 0      | 0      | 0      | 0      | 0      | 0      | 0      |
| 0.0428 | 0.0267 | 0.0217 | 0.0218 | 0.023  | 0.0232 | 0.0228 | 0.0228 | 0.0242 |
| 0.127  | 0.0979 | 0.0892 | 0.0883 | 0.0901 | 0.0919 | 0.0954 | 0.0931 | 0.0903 |
| 0.1173 | 0.1485 | 0.1557 | 0.1638 | 0.1706 | 0.1733 | 0.1869 | 0.1882 | 0.1851 |
| 0.0714 | 0.2019 | 0.2031 | 0.204  | 0.203  | 0.1829 | 0.1975 | 0.1679 | 0.165  |
| 0.0681 | 0.2549 | 0.2448 | 0.2557 | 0.241  | 0.2054 | 0.2085 | 0.172  | 0.1815 |
| 0.2583 | 0.3799 | 0.3478 | 0.34   | 0.3441 | 0.3159 | 0.305  | 0.2748 | 0.2659 |
| 0.2906 | 0.3917 | 0.3523 | 0.3276 | 0.3304 | 0.2832 | 0.2845 | 0.2539 | 0.2481 |
| 0.3899 | 0.4061 | 0.3261 | 0.3208 | 0.3124 | 0.3067 | 0.2913 | 0.2531 | 0.2477 |
| 0.1488 | 0.3378 | 0.3252 | 0.3179 | 0.3036 | 0.284  | 0.2624 | 0.2347 | 0.2306 |
| 0.0896 | 0.261  | 0.2622 | 0.261  | 0.2631 | 0.229  | 0.2321 | 0.2055 | 0.1976 |
| 0.0614 | 0.1604 | 0.1565 | 0.1643 | 0.1655 | 0.1472 | 0.1493 | 0.1377 | 0.1346 |
| 0.2468 | 0.3068 | 0.279  | 0.2788 | 0.2856 | 0.2664 | 0.2648 | 0.2382 | 0.2361 |
| 1.1118 | 0.8889 | 0.7497 | 0.7359 | 0.6971 | 0.6934 | 0.6765 | 0.656  | 0.677  |
| 1.2006 | 0.8746 | 0.6842 | 0.6498 | 0.6544 | 0.6245 | 0.6735 | 0.6637 | 0.6865 |

|        |        |        |        |        |        |        |        |        |
|--------|--------|--------|--------|--------|--------|--------|--------|--------|
| 0.492  | 0.3966 | 0.3312 | 0.3335 | 0.3421 | 0.3362 | 0.3214 | 0.3071 | 0.2849 |
| 0.0782 | 0.2367 | 0.2247 | 0.2199 | 0.214  | 0.1794 | 0.1765 | 0.1389 | 0.1332 |
| 0.2899 | 0.4049 | 0.3658 | 0.3405 | 0.3516 | 0.3186 | 0.3007 | 0.2736 | 0.2651 |
| 0.5554 | 0.5502 | 0.4746 | 0.4416 | 0.4342 | 0.4216 | 0.4205 | 0.3852 | 0.3858 |
| 0.2742 | 0.3998 | 0.3752 | 0.3453 | 0.3442 | 0.3116 | 0.3099 | 0.2605 | 0.2546 |
| 0.1105 | 0.3082 | 0.2723 | 0.2767 | 0.2812 | 0.2423 | 0.2472 | 0.1927 | 0.1827 |
| 0.2468 | 0.3672 | 0.3337 | 0.3298 | 0.3238 | 0.2976 | 0.3033 | 0.263  | 0.2662 |
| 0.1694 | 0.3168 | 0.2981 | 0.2951 | 0.2962 | 0.2623 | 0.2548 | 0.2115 | 0.2035 |
| 0.2389 | 0.3832 | 0.3529 | 0.3425 | 0.3277 | 0.2891 | 0.2945 | 0.246  | 0.2218 |
| 0.1009 | 0.3082 | 0.2774 | 0.2629 | 0.2581 | 0.2338 | 0.2222 | 0.173  | 0.1753 |
| 0.1872 | 0.3739 | 0.3646 | 0.3467 | 0.3305 | 0.2941 | 0.279  | 0.2315 | 0.2197 |
| 0.1451 | 0.2418 | 0.2334 | 0.2238 | 0.2272 | 0.2095 | 0.2112 | 0.1866 | 0.1827 |
| 0.0734 | 0.1612 | 0.1643 | 0.1696 | 0.1724 | 0.1647 | 0.1725 | 0.1603 | 0.1639 |
| 0.2119 | 0.3188 | 0.2963 | 0.2923 | 0.2977 | 0.2626 | 0.2629 | 0.2214 | 0.2303 |
| 0.4434 | 0.5311 | 0.4754 | 0.4396 | 0.4364 | 0.3964 | 0.384  | 0.3623 | 0.3503 |
| 0.5195 | 0.5312 | 0.4608 | 0.4479 | 0.4472 | 0.4302 | 0.4181 | 0.3987 | 0.3712 |
| 0.2243 | 0.3675 | 0.3517 | 0.3497 | 0.3555 | 0.3059 | 0.2965 | 0.2767 | 0.2629 |
| 0.0755 | 0.2242 | 0.2323 | 0.2233 | 0.2294 | 0.2063 | 0.2052 | 0.1686 | 0.1643 |
| 0.0714 | 0.169  | 0.1717 | 0.1748 | 0.1794 | 0.1714 | 0.1797 | 0.1614 | 0.1602 |
| 0.0698 | 0.1135 | 0.1231 | 0.1385 | 0.143  | 0.1518 | 0.1664 | 0.1613 | 0.1515 |
| 0.0952 | 0.0824 | 0.1037 | 0.1136 | 0.1202 | 0.1358 | 0.1502 | 0.154  | 0.149  |
| 0.0397 | 0.0361 | 0.0368 | 0.0376 | 0.0392 | 0.0424 | 0.0441 | 0.0457 | 0.0455 |
| 0.0175 | 0.0104 | 0.0082 | 0.0077 | 0.0077 | 0.0077 | 0.0078 | 0.0083 | 0.0084 |
| 0.0284 | 0.0217 | 0.0192 | 0.0178 | 0.0176 | 0.0171 | 0.0171 | 0.0168 | 0.0168 |
| 0.0081 | 0.0045 | 0.0036 | 0.0035 | 0.0034 | 0.0035 | 0.0036 | 0.0036 | 0.0039 |
| 0.0083 | 0.005  | 0.0041 | 0.0038 | 0.0037 | 0.0035 | 0.0036 | 0.0039 | 0.0036 |
| 0      | 0      | 0      | 0      | 0      | 0      | 0      | 0      | 0      |
| 0      | 0      | 0      | 0      | 0      | 0      | 0      | 0      | 0      |
| 0      | 0      | 0      | 0      | 0      | 0      | 0      | 0      | 0      |
| 0      | 0      | 0      | 0      | 0      | 0      | 0      | 0      | 0      |
| 0      | 0      | 0      | 0      | 0      | 0      | 0      | 0      | 0      |
| 0      | 0      | 0      | 0      | 0      | 0      | 0      | 0      | 0      |
| 0      | 0      | 0      | 0      | 0      | 0      | 0      | 0      | 0      |
| 0      | 0      | 0      | 0      | 0      | 0      | 0      | 0      | 0      |
| 0      | 0      | 0      | 0      | 0      | 0      | 0      | 0      | 0      |
| 0.003  | 0.0073 | 0.007  | 0.0073 | 0.0074 | 0.0063 | 0.0063 | 0.0053 | 0.0055 |
| 0.0161 | 0.0277 | 0.027  | 0.0278 | 0.0269 | 0.0256 | 0.0258 | 0.0236 | 0.0223 |
| 0.0969 | 0.1308 | 0.1219 | 0.1242 | 0.1302 | 0.1239 | 0.1239 | 0.1143 | 0.1127 |
| 0.135  | 0.206  | 0.2057 | 0.2086 | 0.2058 | 0.2064 | 0.2088 | 0.1932 | 0.1923 |
| 0.0808 | 0.2288 | 0.2194 | 0.2177 | 0.2114 | 0.1866 | 0.1893 | 0.1612 | 0.1595 |
| 0.1289 | 0.3238 | 0.3073 | 0.3124 | 0.3029 | 0.2885 | 0.2859 | 0.2447 | 0.2484 |
| 0.2104 | 0.3598 | 0.3348 | 0.3222 | 0.3155 | 0.2846 | 0.2873 | 0.2599 | 0.2623 |
| 0.2655 | 0.361  | 0.3381 | 0.3292 | 0.3317 | 0.2978 | 0.3053 | 0.2771 | 0.2818 |
| 0.3063 | 0.3604 | 0.3312 | 0.3236 | 0.2939 | 0.2715 | 0.2775 | 0.2524 | 0.2498 |

|        |        |        |        |        |        |        |        |        |
|--------|--------|--------|--------|--------|--------|--------|--------|--------|
| 0.201  | 0.3297 | 0.3228 | 0.3149 | 0.2973 | 0.2813 | 0.2994 | 0.2549 | 0.237  |
| 0.1887 | 0.3238 | 0.3055 | 0.2933 | 0.3062 | 0.2645 | 0.2587 | 0.2261 | 0.2213 |
| 0.103  | 0.2248 | 0.2182 | 0.2343 | 0.2227 | 0.2023 | 0.1978 | 0.1769 | 0.1739 |
| 0.1363 | 0.2245 | 0.2089 | 0.2136 | 0.2069 | 0.1918 | 0.1981 | 0.1768 | 0.1731 |
| 0.5647 | 0.4774 | 0.4135 | 0.4281 | 0.4185 | 0.3874 | 0.3607 | 0.3453 | 0.3517 |
| 0.6912 | 0.5038 | 0.4287 | 0.4066 | 0.3947 | 0.3762 | 0.3652 | 0.381  | 0.3687 |
| 0.2768 | 0.2651 | 0.239  | 0.2438 | 0.2539 | 0.243  | 0.2396 | 0.226  | 0.2201 |
| 0.1009 | 0.2663 | 0.2565 | 0.244  | 0.2486 | 0.231  | 0.2335 | 0.1917 | 0.1887 |
| 0.427  | 0.4718 | 0.426  | 0.4088 | 0.3928 | 0.3809 | 0.3612 | 0.3123 | 0.3134 |
| 0.6716 | 0.5868 | 0.5361 | 0.5134 | 0.5099 | 0.4802 | 0.4505 | 0.4293 | 0.4263 |
| 0.2844 | 0.4082 | 0.3783 | 0.3485 | 0.3339 | 0.2888 | 0.3093 | 0.2709 | 0.2703 |
| 0.0816 | 0.2681 | 0.2563 | 0.2579 | 0.2497 | 0.2263 | 0.2353 | 0.1994 | 0.1904 |
| 0.2725 | 0.373  | 0.3377 | 0.3247 | 0.3211 | 0.2843 | 0.2583 | 0.2191 | 0.2158 |
| 0.2836 | 0.3572 | 0.3235 | 0.3242 | 0.3303 | 0.3029 | 0.305  | 0.2839 | 0.2817 |
| 0.2781 | 0.3889 | 0.3595 | 0.3387 | 0.3473 | 0.3364 | 0.3162 | 0.2666 | 0.2786 |
| 0.1909 | 0.3445 | 0.324  | 0.3235 | 0.3073 | 0.2813 | 0.2814 | 0.2403 | 0.2254 |
| 0.1349 | 0.3363 | 0.3227 | 0.3135 | 0.3183 | 0.2761 | 0.276  | 0.2384 | 0.211  |
| 0.0987 | 0.2019 | 0.199  | 0.1974 | 0.1921 | 0.1792 | 0.184  | 0.162  | 0.1599 |
| 0.081  | 0.117  | 0.1229 | 0.1299 | 0.1336 | 0.1343 | 0.1414 | 0.1504 | 0.1525 |
| 0.1885 | 0.2664 | 0.2476 | 0.2472 | 0.2466 | 0.2296 | 0.2255 | 0.2045 | 0.1996 |
| 0.3403 | 0.4174 | 0.3751 | 0.3583 | 0.3584 | 0.311  | 0.2968 | 0.2526 | 0.2731 |
| 0.4235 | 0.4306 | 0.3764 | 0.387  | 0.3895 | 0.3652 | 0.367  | 0.3432 | 0.3332 |
| 0.1423 | 0.2581 | 0.248  | 0.2462 | 0.2425 | 0.2234 | 0.2213 | 0.1939 | 0.1934 |
| 0.0829 | 0.1969 | 0.182  | 0.179  | 0.1763 | 0.153  | 0.1577 | 0.1386 | 0.134  |
| 0.0982 | 0.2465 | 0.235  | 0.2208 | 0.2197 | 0.1856 | 0.1876 | 0.1518 | 0.1526 |
| 0.1465 | 0.2522 | 0.2449 | 0.2431 | 0.2486 | 0.2325 | 0.2364 | 0.2174 | 0.2068 |
| 0.1144 | 0.1307 | 0.1347 | 0.1432 | 0.1488 | 0.1539 | 0.1712 | 0.1778 | 0.1776 |
| 0.0239 | 0.0168 | 0.0194 | 0.0223 | 0.0246 | 0.0282 | 0.03   | 0.0318 | 0.0304 |
| 0      | 0      | 0      | 0      | 0      | 0      | 0      | 0      | 0      |
| 0.002  | 0.0027 | 0.004  | 0.0054 | 0.0068 | 0.008  | 0.0091 | 0.0102 | 0.0106 |
| 0.0086 | 0.0048 | 0.0038 | 0.0037 | 0.0036 | 0.0038 | 0.0036 | 0.0036 | 0.0036 |
| 0.008  | 0.0045 | 0.0033 | 0.0033 | 0.0032 | 0.0032 | 0.0031 | 0.0032 | 0.0032 |
| 0      | 0      | 0      | 0      | 0      | 0      | 0      | 0      | 0      |
| 0      | 0      | 0      | 0      | 0      | 0      | 0      | 0      | 0      |
| 0      | 0      | 0      | 0      | 0      | 0      | 0      | 0      | 0      |
| 0      | 0      | 0      | 0      | 0      | 0      | 0      | 0      | 0      |
| 0      | 0      | 0      | 0      | 0      | 0      | 0      | 0      | 0      |
| 0      | 0      | 0      | 0      | 0      | 0      | 0      | 0      | 0      |
| 0      | 0      | 0      | 0      | 0      | 0      | 0      | 0      | 0      |
| 0      | 0      | 0      | 0      | 0      | 0      | 0      | 0      | 0      |
| 0.0023 | 0.0035 | 0.0039 | 0.0042 | 0.0042 | 0.0042 | 0.0045 | 0.0045 | 0.0043 |
| 0.0424 | 0.0269 | 0.0223 | 0.023  | 0.0226 | 0.0223 | 0.0224 | 0.0223 | 0.0233 |
| 0.0269 | 0.0419 | 0.0396 | 0.0395 | 0.04   | 0.0369 | 0.0383 | 0.0341 | 0.0332 |
| 0.0615 | 0.1589 | 0.1528 | 0.1603 | 0.1638 | 0.1547 | 0.1555 | 0.1387 | 0.133  |





|        |        |        |        |        |        |        |        |        |
|--------|--------|--------|--------|--------|--------|--------|--------|--------|
| 0      | 0      | 0      | 0      | 0      | 0      | 0      | 0      | 0      |
| 0      | 0      | 0      | 0      | 0      | 0      | 0      | 0      | 0      |
| 0.0041 | 0.0086 | 0.0086 | 0.0089 | 0.0092 | 0.0088 | 0.0095 | 0.0089 | 0.0087 |
| 0.0847 | 0.0487 | 0.0386 | 0.0343 | 0.0338 | 0.0342 | 0.0309 | 0.0352 | 0.0333 |
| 0.0477 | 0.0346 | 0.0297 | 0.0284 | 0.0278 | 0.0274 | 0.0277 | 0.0282 | 0.029  |
| 0.0892 | 0.1563 | 0.1544 | 0.1554 | 0.1537 | 0.1421 | 0.1435 | 0.1342 | 0.1343 |
| 0.293  | 0.3635 | 0.3239 | 0.3096 | 0.2953 | 0.2695 | 0.2622 | 0.2356 | 0.2196 |
| 0.4347 | 0.5113 | 0.4471 | 0.4405 | 0.4395 | 0.4133 | 0.3957 | 0.3527 | 0.3475 |
| 0.2349 | 0.3604 | 0.3339 | 0.3183 | 0.3297 | 0.291  | 0.2994 | 0.2554 | 0.2531 |
| 0.0545 | 0.1697 | 0.1731 | 0.1777 | 0.1828 | 0.1731 | 0.1808 | 0.1591 | 0.1582 |
| 0.2043 | 0.3007 | 0.2866 | 0.2888 | 0.2943 | 0.2695 | 0.2594 | 0.216  | 0.2093 |
| 0.0852 | 0.2589 | 0.2484 | 0.2437 | 0.2452 | 0.2081 | 0.2105 | 0.1806 | 0.1732 |
| 0.1755 | 0.3175 | 0.3043 | 0.2706 | 0.261  | 0.2268 | 0.2336 | 0.1994 | 0.1995 |
| 0.097  | 0.2763 | 0.2565 | 0.2603 | 0.2581 | 0.2328 | 0.2276 | 0.1855 | 0.19   |
| 0.211  | 0.3659 | 0.342  | 0.3362 | 0.338  | 0.3086 | 0.2968 | 0.2606 | 0.2472 |
| 0.4032 | 0.4077 | 0.3627 | 0.3517 | 0.3452 | 0.3114 | 0.3127 | 0.2783 | 0.2865 |
| 0.0866 | 0.175  | 0.1654 | 0.1543 | 0.1558 | 0.1414 | 0.1323 | 0.1102 | 0.1145 |
| 0.1158 | 0.1806 | 0.1827 | 0.1858 | 0.1882 | 0.1789 | 0.185  | 0.1723 | 0.1695 |
| 0.0785 | 0.1759 | 0.1772 | 0.1807 | 0.1806 | 0.1714 | 0.1876 | 0.1744 | 0.1677 |
| 0.1099 | 0.2526 | 0.2428 | 0.234  | 0.2367 | 0.2192 | 0.2258 | 0.1875 | 0.1779 |
| 0.105  | 0.2539 | 0.2445 | 0.2468 | 0.2435 | 0.2136 | 0.2183 | 0.1824 | 0.1858 |
| 0.1102 | 0.2898 | 0.2763 | 0.2718 | 0.2585 | 0.2185 | 0.2236 | 0.1763 | 0.1571 |
| 0.0881 | 0.2613 | 0.2639 | 0.2443 | 0.252  | 0.2308 | 0.234  | 0.1895 | 0.1744 |
| 0.117  | 0.202  | 0.1903 | 0.1938 | 0.2011 | 0.1807 | 0.1862 | 0.1659 | 0.1615 |
| 0.1135 | 0.1962 | 0.1929 | 0.1895 | 0.1913 | 0.1738 | 0.1806 | 0.1562 | 0.1498 |
| 0.137  | 0.3214 | 0.3029 | 0.2954 | 0.291  | 0.2511 | 0.2542 | 0.1999 | 0.2153 |
| 0.1005 | 0.2792 | 0.2489 | 0.256  | 0.2597 | 0.2441 | 0.2287 | 0.2045 | 0.1926 |
| 0.094  | 0.2226 | 0.2189 | 0.2198 | 0.2131 | 0.1904 | 0.1972 | 0.1743 | 0.1625 |
| 0.089  | 0.2757 | 0.282  | 0.274  | 0.2842 | 0.2433 | 0.2476 | 0.1975 | 0.193  |
| 0.1557 | 0.324  | 0.3058 | 0.2945 | 0.2787 | 0.235  | 0.2279 | 0.1899 | 0.1891 |
| 0.1329 | 0.252  | 0.2357 | 0.2396 | 0.2472 | 0.2202 | 0.2141 | 0.1885 | 0.1803 |
| 0.1162 | 0.2539 | 0.2484 | 0.2418 | 0.2405 | 0.2156 | 0.2034 | 0.1761 | 0.1834 |
| 0.0812 | 0.2125 | 0.212  | 0.2163 | 0.2051 | 0.1727 | 0.1832 | 0.1468 | 0.1404 |
| 0.0746 | 0.2295 | 0.2172 | 0.2143 | 0.2202 | 0.2091 | 0.2093 | 0.1695 | 0.1657 |
| 0.1039 | 0.2425 | 0.2291 | 0.2322 | 0.2462 | 0.2237 | 0.2119 | 0.1823 | 0.1902 |
| 0.0717 | 0.1878 | 0.1813 | 0.1768 | 0.1824 | 0.1685 | 0.1727 | 0.154  | 0.1527 |
| 0.0738 | 0.2447 | 0.232  | 0.2357 | 0.2378 | 0.2067 | 0.1949 | 0.16   | 0.1624 |
| 0.148  | 0.3714 | 0.3656 | 0.3574 | 0.3435 | 0.3025 | 0.3078 | 0.257  | 0.2446 |
| 0.1067 | 0.2819 | 0.2659 | 0.2734 | 0.2758 | 0.2419 | 0.2377 | 0.2035 | 0.1958 |
| 0.0766 | 0.1336 | 0.1314 | 0.1353 | 0.1343 | 0.1296 | 0.1365 | 0.1256 | 0.1226 |
| 0.2955 | 0.1844 | 0.1557 | 0.1481 | 0.1504 | 0.153  | 0.1453 | 0.1453 | 0.1486 |
| 0.5233 | 0.3062 | 0.2569 | 0.2294 | 0.2393 | 0.238  | 0.2352 | 0.2464 | 0.2416 |
| 0.0087 | 0.005  | 0.0042 | 0.0041 | 0.004  | 0.004  | 0.0037 | 0.0041 | 0.004  |
| 0.0094 | 0.0058 | 0.0047 | 0.0044 | 0.0042 | 0.0042 | 0.0041 | 0.004  | 0.0041 |

|        |        |        |        |        |        |        |        |        |   |
|--------|--------|--------|--------|--------|--------|--------|--------|--------|---|
| 0      | 0      | 0      | 0      | 0      | 0      | 0      | 0      | 0      | 0 |
| 0      | 0      | 0      | 0      | 0      | 0      | 0      | 0      | 0      | 0 |
| 0      | 0      | 0      | 0      | 0      | 0      | 0      | 0      | 0      | 0 |
| 0      | 0      | 0      | 0      | 0      | 0      | 0      | 0      | 0      | 0 |
| 0      | 0      | 0      | 0      | 0      | 0      | 0      | 0      | 0      | 0 |
| 0      | 0      | 0      | 0      | 0      | 0      | 0      | 0      | 0      | 0 |
| 0      | 0      | 0      | 0      | 0      | 0      | 0      | 0      | 0      | 0 |
| 0      | 0      | 0      | 0      | 0      | 0      | 0      | 0      | 0      | 0 |
| 0.0105 | 0.01   | 0.0088 | 0.0084 | 0.0083 | 0.0077 | 0.0078 | 0.0068 | 0.0067 |   |
| 0.0651 | 0.0377 | 0.0286 | 0.0286 | 0.0284 | 0.0294 | 0.0268 | 0.0255 | 0.0291 |   |
| 0.0356 | 0.0328 | 0.0314 | 0.0322 | 0.033  | 0.0335 | 0.0346 | 0.0347 | 0.0342 |   |
| 0.1364 | 0.1435 | 0.135  | 0.1354 | 0.135  | 0.1317 | 0.1342 | 0.1284 | 0.1242 |   |
| 0.387  | 0.3711 | 0.3283 | 0.3176 | 0.3255 | 0.3101 | 0.3114 | 0.284  | 0.2877 |   |
| 0.3899 | 0.4733 | 0.4298 | 0.4118 | 0.3925 | 0.3659 | 0.3609 | 0.3285 | 0.329  |   |
| 0.1811 | 0.3463 | 0.3045 | 0.2932 | 0.3019 | 0.2561 | 0.2524 | 0.2216 | 0.213  |   |
| 0.116  | 0.2818 | 0.2567 | 0.2715 | 0.2644 | 0.2324 | 0.2289 | 0.1979 | 0.184  |   |
| 0.1085 | 0.2682 | 0.253  | 0.2401 | 0.2444 | 0.2178 | 0.2124 | 0.1732 | 0.1663 |   |
| 0.1097 | 0.2708 | 0.2584 | 0.2617 | 0.2499 | 0.2169 | 0.2235 | 0.1881 | 0.1927 |   |
| 0.1936 | 0.3159 | 0.2881 | 0.2831 | 0.2789 | 0.2501 | 0.2407 | 0.2168 | 0.225  |   |
| 0.1801 | 0.3502 | 0.3239 | 0.3183 | 0.3202 | 0.2758 | 0.275  | 0.2269 | 0.2188 |   |
| 0.3769 | 0.431  | 0.3956 | 0.3763 | 0.3633 | 0.3394 | 0.3441 | 0.3073 | 0.2678 |   |
| 0.534  | 0.43   | 0.349  | 0.3339 | 0.353  | 0.3321 | 0.3508 | 0.34   | 0.3397 |   |
| 0.2174 | 0.1943 | 0.1762 | 0.1694 | 0.1653 | 0.1605 | 0.1568 | 0.148  | 0.1514 |   |
| 0.0746 | 0.1538 | 0.1553 | 0.1582 | 0.1622 | 0.155  | 0.164  | 0.1511 | 0.1453 |   |
| 0.1796 | 0.2468 | 0.2358 | 0.2367 | 0.2359 | 0.2272 | 0.2336 | 0.2186 | 0.2172 |   |
| 0.1355 | 0.2579 | 0.2381 | 0.2431 | 0.2448 | 0.2147 | 0.2133 | 0.185  | 0.1796 |   |
| 0.1126 | 0.2568 | 0.2436 | 0.2484 | 0.2437 | 0.2242 | 0.2318 | 0.1999 | 0.202  |   |
| 0.0597 | 0.2227 | 0.2215 | 0.2383 | 0.2452 | 0.2113 | 0.2061 | 0.1722 | 0.1661 |   |
| 0.174  | 0.3114 | 0.3003 | 0.2939 | 0.2953 | 0.268  | 0.2681 | 0.2244 | 0.2052 |   |
| 0.1845 | 0.2622 | 0.2385 | 0.2419 | 0.2423 | 0.2291 | 0.2342 | 0.2091 | 0.2132 |   |
| 0.1876 | 0.3027 | 0.2854 | 0.2742 | 0.2682 | 0.2434 | 0.2519 | 0.223  | 0.2135 |   |
| 0.1796 | 0.3497 | 0.325  | 0.3162 | 0.3073 | 0.2844 | 0.2798 | 0.2308 | 0.2182 |   |
| 0.1115 | 0.2657 | 0.2553 | 0.2544 | 0.2516 | 0.2216 | 0.2246 | 0.1734 | 0.1745 |   |
| 0.1369 | 0.2371 | 0.2334 | 0.2284 | 0.2207 | 0.2073 | 0.2112 | 0.1849 | 0.1885 |   |
| 0.1232 | 0.2884 | 0.2671 | 0.2591 | 0.2606 | 0.2269 | 0.2212 | 0.1851 | 0.1878 |   |
| 0.1576 | 0.3401 | 0.3129 | 0.2913 | 0.2908 | 0.25   | 0.2593 | 0.2022 | 0.1815 |   |
| 0.1908 | 0.328  | 0.3059 | 0.302  | 0.2952 | 0.2785 | 0.2638 | 0.2254 | 0.2164 |   |
| 0.1379 | 0.2424 | 0.2204 | 0.2133 | 0.2111 | 0.1917 | 0.1922 | 0.1754 | 0.1737 |   |
| 0.1129 | 0.1737 | 0.1727 | 0.1788 | 0.1818 | 0.1728 | 0.1776 | 0.1671 | 0.1647 |   |
| 0.1515 | 0.2282 | 0.2179 | 0.2169 | 0.2162 | 0.2025 | 0.2095 | 0.2014 | 0.1999 |   |
| 0.1225 | 0.2968 | 0.2772 | 0.2522 | 0.2532 | 0.2113 | 0.2263 | 0.1934 | 0.1923 |   |
| 0.1024 | 0.275  | 0.2619 | 0.2659 | 0.2408 | 0.2027 | 0.2127 | 0.1744 | 0.1676 |   |
| 0.1233 | 0.3379 | 0.3282 | 0.3279 | 0.3091 | 0.2663 | 0.2694 | 0.2298 | 0.2301 |   |
| 0.1158 | 0.3075 | 0.2907 | 0.2797 | 0.2622 | 0.2174 | 0.2246 | 0.1937 | 0.1993 |   |

|        |        |        |        |        |        |        |        |        |
|--------|--------|--------|--------|--------|--------|--------|--------|--------|
| 0.124  | 0.2789 | 0.2619 | 0.2651 | 0.2522 | 0.2114 | 0.2033 | 0.1554 | 0.1518 |
| 0.1154 | 0.1709 | 0.1626 | 0.1651 | 0.1676 | 0.1607 | 0.167  | 0.1536 | 0.1498 |
| 0.2275 | 0.1449 | 0.1285 | 0.1199 | 0.1181 | 0.1251 | 0.1184 | 0.1203 | 0.1192 |
| 0.3993 | 0.2487 | 0.1997 | 0.1904 | 0.1915 | 0.1999 | 0.1979 | 0.2042 | 0.208  |
| 0.0093 | 0.0058 | 0.0046 | 0.0041 | 0.0042 | 0.0043 | 0.0044 | 0.0043 | 0.0042 |
| 0.0092 | 0.0058 | 0.0047 | 0.0045 | 0.0044 | 0.0041 | 0.0041 | 0.0043 | 0.0046 |
| 0      | 0      | 0      | 0      | 0      | 0      | 0      | 0      | 0      |
| 0      | 0      | 0      | 0      | 0      | 0      | 0      | 0      | 0      |
| 0      | 0      | 0      | 0      | 0      | 0      | 0      | 0      | 0      |
| 0      | 0      | 0      | 0      | 0      | 0      | 0      | 0      | 0      |
| 0      | 0      | 0      | 0      | 0      | 0      | 0      | 0      | 0      |
| 0      | 0      | 0      | 0      | 0      | 0      | 0      | 0      | 0      |
| 0      | 0      | 0      | 0      | 0      | 0      | 0      | 0      | 0      |
| 0      | 0      | 0      | 0      | 0      | 0      | 0      | 0      | 0      |
| 0.0104 | 0.0088 | 0.0077 | 0.0076 | 0.0076 | 0.0077 | 0.0078 | 0.0078 | 0.0076 |
| 0.0278 | 0.049  | 0.0479 | 0.0494 | 0.05   | 0.0476 | 0.0492 | 0.0467 | 0.0459 |
| 0.0447 | 0.0895 | 0.0937 | 0.0944 | 0.0937 | 0.0917 | 0.0984 | 0.0918 | 0.0924 |
| 0.1674 | 0.1503 | 0.1334 | 0.1296 | 0.1238 | 0.1187 | 0.1201 | 0.1116 | 0.1129 |
| 0.391  | 0.3455 | 0.2952 | 0.2933 | 0.2964 | 0.2705 | 0.2735 | 0.268  | 0.2548 |
| 0.3234 | 0.4175 | 0.3868 | 0.3695 | 0.3519 | 0.3224 | 0.3117 | 0.2736 | 0.2603 |
| 0.1456 | 0.3217 | 0.321  | 0.3165 | 0.3094 | 0.2763 | 0.2778 | 0.2401 | 0.2334 |
| 0.1604 | 0.3345 | 0.3262 | 0.3166 | 0.3124 | 0.2731 | 0.2795 | 0.2278 | 0.227  |
| 0.0963 | 0.238  | 0.2144 | 0.2035 | 0.2079 | 0.1863 | 0.1874 | 0.1641 | 0.1639 |
| 0.2228 | 0.37   | 0.3529 | 0.3571 | 0.3491 | 0.3232 | 0.3147 | 0.2761 | 0.2882 |
| 0.1119 | 0.3176 | 0.3117 | 0.2946 | 0.2855 | 0.2493 | 0.235  | 0.1786 | 0.1694 |
| 0.0521 | 0.2463 | 0.2335 | 0.2334 | 0.2321 | 0.2021 | 0.2198 | 0.1838 | 0.1682 |
| 0.2349 | 0.3602 | 0.322  | 0.3093 | 0.2966 | 0.2607 | 0.2528 | 0.2167 | 0.201  |
| 0.3691 | 0.3401 | 0.3067 | 0.2992 | 0.2963 | 0.2894 | 0.2842 | 0.2528 | 0.2471 |
| 0.2918 | 0.2449 | 0.213  | 0.206  | 0.2053 | 0.2006 | 0.2021 | 0.1965 | 0.1888 |
| 0.0569 | 0.1231 | 0.1243 | 0.1271 | 0.1274 | 0.1193 | 0.1256 | 0.1132 | 0.1111 |
| 0.106  | 0.1365 | 0.132  | 0.1333 | 0.1377 | 0.1341 | 0.1355 | 0.1261 | 0.1248 |
| 0.0542 | 0.134  | 0.1407 | 0.1415 | 0.1414 | 0.1333 | 0.1336 | 0.1207 | 0.1201 |
| 0.0867 | 0.1621 | 0.1613 | 0.1681 | 0.1692 | 0.1644 | 0.1701 | 0.1585 | 0.155  |
| 0.1124 | 0.2039 | 0.1964 | 0.2007 | 0.2027 | 0.192  | 0.1963 | 0.1857 | 0.1851 |
| 0.1349 | 0.2713 | 0.2538 | 0.251  | 0.2591 | 0.2375 | 0.2302 | 0.2123 | 0.2029 |
| 0.1431 | 0.2814 | 0.2717 | 0.2772 | 0.2756 | 0.2377 | 0.2439 | 0.212  | 0.2159 |
| 0.1581 | 0.316  | 0.2941 | 0.293  | 0.2957 | 0.2431 | 0.2431 | 0.2095 | 0.2146 |
| 0.1811 | 0.3042 | 0.2811 | 0.2897 | 0.2756 | 0.2564 | 0.2427 | 0.2054 | 0.2143 |
| 0.1432 | 0.2666 | 0.2566 | 0.2473 | 0.2374 | 0.2111 | 0.1989 | 0.1775 | 0.1763 |
| 0.0982 | 0.1771 | 0.1729 | 0.1811 | 0.1792 | 0.1671 | 0.1679 | 0.1505 | 0.1496 |
| 0.0855 | 0.2208 | 0.2151 | 0.2233 | 0.2257 | 0.2048 | 0.2103 | 0.1853 | 0.1799 |
| 0.092  | 0.2662 | 0.2543 | 0.2489 | 0.2422 | 0.1965 | 0.1964 | 0.1527 | 0.1519 |
| 0.1388 | 0.3    | 0.2859 | 0.2771 | 0.2557 | 0.2356 | 0.2325 | 0.1909 | 0.1836 |
| 0.1205 | 0.2369 | 0.2203 | 0.2197 | 0.2136 | 0.1995 | 0.2005 | 0.1857 | 0.1759 |

|        |        |        |        |        |        |        |        |        |
|--------|--------|--------|--------|--------|--------|--------|--------|--------|
| 0.1128 | 0.1717 | 0.1669 | 0.1697 | 0.171  | 0.1629 | 0.1675 | 0.1537 | 0.1514 |
| 0.2104 | 0.2758 | 0.2457 | 0.2483 | 0.2399 | 0.213  | 0.2111 | 0.191  | 0.1949 |
| 0.1478 | 0.2797 | 0.2792 | 0.2723 | 0.2763 | 0.2333 | 0.2225 | 0.189  | 0.1842 |
| 0.1264 | 0.3392 | 0.3241 | 0.3084 | 0.3017 | 0.2565 | 0.2524 | 0.1953 | 0.2113 |
| 0.1529 | 0.322  | 0.3047 | 0.3131 | 0.2867 | 0.2491 | 0.2571 | 0.2271 | 0.2234 |
| 0.1825 | 0.2451 | 0.2274 | 0.2326 | 0.2376 | 0.2181 | 0.2112 | 0.1935 | 0.1853 |
| 0.1791 | 0.1951 | 0.1837 | 0.1873 | 0.1919 | 0.1823 | 0.1794 | 0.1662 | 0.1668 |
| 0.1236 | 0.1493 | 0.1475 | 0.1492 | 0.1525 | 0.152  | 0.1589 | 0.1542 | 0.152  |
| 0.0251 | 0.031  | 0.0286 | 0.0288 | 0.0284 | 0.0272 | 0.0279 | 0.0253 | 0.0245 |
| 0.0241 | 0.0236 | 0.022  | 0.0223 | 0.0225 | 0.0223 | 0.0228 | 0.0225 | 0.0223 |
| 0.009  | 0.0056 | 0.0047 | 0.0045 | 0.0045 | 0.0045 | 0.0045 | 0.0048 | 0.0046 |
| 0.0085 | 0.0049 | 0.004  | 0.004  | 0.0041 | 0.004  | 0.004  | 0.0043 | 0.0046 |
| 0.0007 | 0.0026 | 0.0024 | 0.0023 | 0.0022 | 0.0021 | 0.002  | 0.0016 | 0.0015 |
| 0.0007 | 0.0008 | 0.001  | 0.0013 | 0.0014 | 0.0016 | 0.0018 | 0.0019 | 0.0019 |
| 0.0096 | 0.0063 | 0.0053 | 0.0053 | 0.0053 | 0.0056 | 0.0055 | 0.0057 | 0.0055 |
| 0.01   | 0.0107 | 0.0097 | 0.0093 | 0.0094 | 0.0095 | 0.0095 | 0.0087 | 0.0086 |
| 0.0027 | 0.0039 | 0.0041 | 0.0046 | 0.0051 | 0.0055 | 0.0062 | 0.0062 | 0.0064 |
| 0.0118 | 0.0143 | 0.0129 | 0.0127 | 0.0127 | 0.0122 | 0.0122 | 0.0114 | 0.0117 |
| 0.1104 | 0.0771 | 0.067  | 0.0667 | 0.0656 | 0.0655 | 0.0625 | 0.0609 | 0.0604 |
| 0.1855 | 0.1129 | 0.0993 | 0.093  | 0.0953 | 0.0993 | 0.1025 | 0.109  | 0.1102 |
| 0.0309 | 0.0616 | 0.065  | 0.0694 | 0.0727 | 0.0734 | 0.0779 | 0.0747 | 0.0731 |
| 0.1112 | 0.1706 | 0.1687 | 0.1682 | 0.1695 | 0.1655 | 0.1702 | 0.1586 | 0.154  |
| 0.1389 | 0.1886 | 0.1817 | 0.1863 | 0.1881 | 0.1773 | 0.1771 | 0.162  | 0.1577 |
| 0.0926 | 0.1528 | 0.1464 | 0.1518 | 0.1505 | 0.1405 | 0.1431 | 0.1293 | 0.1265 |
| 0.0879 | 0.2111 | 0.1938 | 0.206  | 0.1995 | 0.1784 | 0.1707 | 0.1379 | 0.1332 |
| 0.1636 | 0.3269 | 0.2986 | 0.3083 | 0.3035 | 0.2731 | 0.2715 | 0.2431 | 0.2239 |
| 0.1729 | 0.3251 | 0.3028 | 0.2944 | 0.2887 | 0.2583 | 0.258  | 0.2231 | 0.2139 |
| 0.1246 | 0.2687 | 0.2608 | 0.2531 | 0.2547 | 0.2345 | 0.2297 | 0.2008 | 0.1924 |
| 0.1023 | 0.2027 | 0.1995 | 0.1987 | 0.1983 | 0.1872 | 0.1886 | 0.17   | 0.1609 |
| 0.2832 | 0.3798 | 0.358  | 0.3381 | 0.3345 | 0.2936 | 0.3032 | 0.2654 | 0.2543 |
| 0.1887 | 0.368  | 0.3368 | 0.3338 | 0.3375 | 0.2934 | 0.2758 | 0.2438 | 0.2389 |
| 0.0759 | 0.2752 | 0.2751 | 0.2784 | 0.2803 | 0.2361 | 0.223  | 0.1964 | 0.1832 |
| 0.1049 | 0.2782 | 0.2599 | 0.2666 | 0.2718 | 0.2553 | 0.244  | 0.1937 | 0.1977 |
| 0.2983 | 0.2892 | 0.2628 | 0.2473 | 0.2492 | 0.2407 | 0.2252 | 0.2151 | 0.2079 |
| 0.591  | 0.3803 | 0.3035 | 0.2693 | 0.2733 | 0.2712 | 0.2669 | 0.251  | 0.26   |
| 0.2796 | 0.2416 | 0.2018 | 0.2046 | 0.2017 | 0.1923 | 0.1904 | 0.1783 | 0.1827 |
| 0.4847 | 0.2993 | 0.2373 | 0.239  | 0.2368 | 0.2366 | 0.2233 | 0.2315 | 0.2142 |
| 0.1739 | 0.1999 | 0.1911 | 0.1898 | 0.1896 | 0.1869 | 0.192  | 0.1798 | 0.1742 |
| 0.0955 | 0.1983 | 0.1937 | 0.1952 | 0.1889 | 0.1796 | 0.1813 | 0.1611 | 0.1617 |
| 0.1364 | 0.2202 | 0.2177 | 0.2116 | 0.2103 | 0.1936 | 0.1993 | 0.1802 | 0.1736 |
| 0.0973 | 0.229  | 0.2206 | 0.2245 | 0.2194 | 0.2064 | 0.2156 | 0.181  | 0.1823 |
| 0.0772 | 0.2528 | 0.2357 | 0.2379 | 0.2494 | 0.2174 | 0.2157 | 0.1846 | 0.1915 |
| 0.1267 | 0.295  | 0.2972 | 0.2997 | 0.2941 | 0.2698 | 0.257  | 0.2145 | 0.2048 |
| 0.109  | 0.2394 | 0.221  | 0.2216 | 0.2255 | 0.2085 | 0.2048 | 0.182  | 0.1753 |

|        |        |        |        |        |        |        |        |        |
|--------|--------|--------|--------|--------|--------|--------|--------|--------|
| 0.1669 | 0.2542 | 0.2406 | 0.2347 | 0.2269 | 0.2025 | 0.2051 | 0.1881 | 0.1901 |
| 0.1176 | 0.2284 | 0.2268 | 0.2271 | 0.2343 | 0.2148 | 0.21   | 0.1828 | 0.1773 |
| 0.0927 | 0.2398 | 0.2223 | 0.2118 | 0.2108 | 0.1914 | 0.2055 | 0.1778 | 0.1805 |
| 0.1531 | 0.3156 | 0.2796 | 0.2764 | 0.2603 | 0.2327 | 0.2323 | 0.213  | 0.1912 |
| 0.1445 | 0.2511 | 0.2351 | 0.2295 | 0.2372 | 0.2118 | 0.2119 | 0.1825 | 0.176  |
| 0.2209 | 0.2696 | 0.2465 | 0.2335 | 0.2262 | 0.1916 | 0.197  | 0.173  | 0.174  |
| 0.2583 | 0.3333 | 0.2986 | 0.2962 | 0.2998 | 0.2664 | 0.2641 | 0.2201 | 0.2328 |
| 0.1941 | 0.306  | 0.2859 | 0.2785 | 0.268  | 0.2437 | 0.2422 | 0.2079 | 0.1959 |
| 0.0467 | 0.2277 | 0.224  | 0.2292 | 0.237  | 0.2038 | 0.208  | 0.1723 | 0.1566 |
| 0.08   | 0.255  | 0.2313 | 0.2292 | 0.2282 | 0.1988 | 0.1921 | 0.151  | 0.1502 |
| 0.145  | 0.3027 | 0.2883 | 0.282  | 0.2747 | 0.237  | 0.2334 | 0.1963 | 0.1687 |
| 0.2953 | 0.285  | 0.2501 | 0.2467 | 0.2524 | 0.246  | 0.2492 | 0.2312 | 0.2246 |
| 0.3639 | 0.2694 | 0.2305 | 0.2271 | 0.2322 | 0.2295 | 0.2227 | 0.2284 | 0.2235 |
| 0.2332 | 0.2431 | 0.2155 | 0.2142 | 0.206  | 0.187  | 0.1865 | 0.1755 | 0.1769 |
| 0.0146 | 0.017  | 0.0165 | 0.0169 | 0.0172 | 0.0171 | 0.0178 | 0.0173 | 0.0169 |
| 0.0111 | 0.0116 | 0.0102 | 0.0097 | 0.0096 | 0.0095 | 0.0098 | 0.0087 | 0.0087 |
| 0      | 0      | 0      | 0      | 0      | 0      | 0      | 0      | 0      |
| 0      | 0      | 0      | 0      | 0      | 0      | 0      | 0      | 0      |
| 0.0005 | 0.0015 | 0.0015 | 0.0016 | 0.0017 | 0.0016 | 0.0017 | 0.0016 | 0.0016 |
| 0.0084 | 0.0048 | 0.004  | 0.004  | 0.004  | 0.0042 | 0.004  | 0.0038 | 0.0037 |
| 0.0246 | 0.0144 | 0.0113 | 0.0117 | 0.0121 | 0.0129 | 0.0125 | 0.0135 | 0.0137 |
| 0.0444 | 0.028  | 0.022  | 0.0218 | 0.0222 | 0.0218 | 0.0208 | 0.021  | 0.0218 |
| 0.0361 | 0.0233 | 0.0196 | 0.0185 | 0.0183 | 0.0187 | 0.0183 | 0.0188 | 0.018  |
| 0.0399 | 0.0232 | 0.0165 | 0.0143 | 0.0154 | 0.0166 | 0.016  | 0.0152 | 0.0159 |
| 0.106  | 0.0689 | 0.0574 | 0.055  | 0.055  | 0.0586 | 0.0571 | 0.0568 | 0.0579 |
| 0.212  | 0.152  | 0.134  | 0.1352 | 0.1395 | 0.1433 | 0.144  | 0.1473 | 0.1482 |
| 0.1998 | 0.185  | 0.1812 | 0.1861 | 0.1916 | 0.1959 | 0.203  | 0.2069 | 0.2063 |
| 0.0603 | 0.1135 | 0.1261 | 0.1475 | 0.158  | 0.1557 | 0.1676 | 0.166  | 0.1641 |
| 0.0569 | 0.1271 | 0.1312 | 0.1387 | 0.1437 | 0.1425 | 0.1514 | 0.1399 | 0.1352 |
| 0.1334 | 0.268  | 0.2563 | 0.2564 | 0.2429 | 0.2179 | 0.2227 | 0.1919 | 0.1999 |
| 0.1435 | 0.3212 | 0.3084 | 0.2801 | 0.27   | 0.2345 | 0.2449 | 0.2    | 0.1933 |
| 0.0804 | 0.2348 | 0.2203 | 0.2295 | 0.2234 | 0.2042 | 0.2016 | 0.1705 | 0.1744 |
| 0.0723 | 0.2101 | 0.2023 | 0.1984 | 0.1989 | 0.1705 | 0.1751 | 0.1463 | 0.1349 |
| 0.119  | 0.2386 | 0.2339 | 0.2332 | 0.2475 | 0.2312 | 0.2336 | 0.2064 | 0.1952 |
| 0.0719 | 0.2154 | 0.2212 | 0.2243 | 0.2117 | 0.1778 | 0.1787 | 0.1556 | 0.1522 |
| 0.1384 | 0.2939 | 0.292  | 0.2799 | 0.2686 | 0.2434 | 0.2364 | 0.1913 | 0.1918 |
| 0.1054 | 0.3066 | 0.2713 | 0.2735 | 0.2762 | 0.2364 | 0.2325 | 0.1878 | 0.1896 |
| 0.1488 | 0.2945 | 0.2997 | 0.2828 | 0.2726 | 0.2494 | 0.2501 | 0.232  | 0.2106 |
| 0.3549 | 0.3333 | 0.2898 | 0.2945 | 0.2857 | 0.2707 | 0.2702 | 0.2429 | 0.2506 |
| 0.653  | 0.4035 | 0.3254 | 0.3012 | 0.2986 | 0.2982 | 0.2566 | 0.2713 | 0.2726 |
| 0.9749 | 0.585  | 0.4969 | 0.453  | 0.4196 | 0.4427 | 0.4539 | 0.432  | 0.4319 |
| 0.6115 | 0.3837 | 0.3107 | 0.2989 | 0.2868 | 0.2695 | 0.2656 | 0.2661 | 0.2492 |
| 0.4331 | 0.2934 | 0.2405 | 0.2311 | 0.2312 | 0.2457 | 0.2442 | 0.2383 | 0.2346 |
| 0.223  | 0.2656 | 0.2422 | 0.2396 | 0.2321 | 0.2118 | 0.2141 | 0.1979 | 0.195  |

|        |        |        |        |        |        |        |        |        |
|--------|--------|--------|--------|--------|--------|--------|--------|--------|
| 0.1293 | 0.2643 | 0.236  | 0.2448 | 0.2368 | 0.2095 | 0.2161 | 0.187  | 0.1889 |
| 0.1366 | 0.2787 | 0.258  | 0.232  | 0.238  | 0.2184 | 0.2158 | 0.1729 | 0.161  |
| 0.0869 | 0.2484 | 0.2435 | 0.2541 | 0.2631 | 0.2338 | 0.2393 | 0.2082 | 0.2076 |
| 0.1213 | 0.2897 | 0.2609 | 0.2811 | 0.2796 | 0.2381 | 0.249  | 0.197  | 0.1779 |
| 0.1135 | 0.3007 | 0.2923 | 0.2842 | 0.2698 | 0.2165 | 0.2225 | 0.1959 | 0.1957 |
| 0.154  | 0.3115 | 0.2753 | 0.277  | 0.2659 | 0.2374 | 0.2339 | 0.1855 | 0.1697 |
| 0.1308 | 0.3042 | 0.2847 | 0.2851 | 0.2757 | 0.237  | 0.2415 | 0.1909 | 0.1765 |
| 0.1159 | 0.273  | 0.2633 | 0.2417 | 0.2467 | 0.2148 | 0.2134 | 0.1849 | 0.1738 |
| 0.0887 | 0.2446 | 0.2293 | 0.2071 | 0.2119 | 0.1835 | 0.1907 | 0.1675 | 0.1559 |
| 0.1998 | 0.3543 | 0.3327 | 0.317  | 0.3118 | 0.2824 | 0.2769 | 0.2282 | 0.2197 |
| 0.1519 | 0.3071 | 0.2842 | 0.2794 | 0.298  | 0.263  | 0.2652 | 0.2304 | 0.2369 |
| 0.2038 | 0.3409 | 0.3085 | 0.2872 | 0.2891 | 0.2508 | 0.2501 | 0.2215 | 0.2294 |
| 0.1249 | 0.2873 | 0.275  | 0.274  | 0.2719 | 0.2535 | 0.2572 | 0.2157 | 0.206  |
| 0.0664 | 0.1863 | 0.1835 | 0.1851 | 0.1833 | 0.1607 | 0.1649 | 0.136  | 0.1411 |
| 0.202  | 0.3021 | 0.28   | 0.2733 | 0.2783 | 0.2515 | 0.2467 | 0.2171 | 0.211  |
| 0.1383 | 0.2883 | 0.2679 | 0.2646 | 0.2641 | 0.2386 | 0.2453 | 0.2022 | 0.2125 |
| 0.1382 | 0.282  | 0.243  | 0.2514 | 0.2416 | 0.2101 | 0.2095 | 0.1719 | 0.1743 |
| 0.278  | 0.3445 | 0.3095 | 0.3002 | 0.2994 | 0.2649 | 0.268  | 0.224  | 0.2219 |
| 0.3121 | 0.3696 | 0.3165 | 0.3185 | 0.3164 | 0.2945 | 0.293  | 0.2703 | 0.271  |
| 0.2242 | 0.3087 | 0.2754 | 0.2738 | 0.2598 | 0.2346 | 0.2268 | 0.1977 | 0.1975 |
| 0.0248 | 0.0293 | 0.0275 | 0.027  | 0.0263 | 0.0247 | 0.0242 | 0.0219 | 0.0207 |
| 0.0562 | 0.0368 | 0.0301 | 0.0277 | 0.0265 | 0.0282 | 0.0291 | 0.0294 | 0.0282 |
| 0      | 0      | 0      | 0      | 0      | 0      | 0      | 0      | 0      |
| 0      | 0      | 0      | 0      | 0      | 0      | 0      | 0      | 0      |
| 0.0169 | 0.0103 | 0.0085 | 0.0083 | 0.0085 | 0.0086 | 0.0087 | 0.0088 | 0.0084 |
| 0.0097 | 0.0088 | 0.0079 | 0.0073 | 0.0073 | 0.0067 | 0.0064 | 0.006  | 0.0062 |
| 0.0185 | 0.0115 | 0.0096 | 0.0097 | 0.0104 | 0.0107 | 0.0107 | 0.0109 | 0.011  |
| 0.0434 | 0.0259 | 0.022  | 0.0205 | 0.0195 | 0.0186 | 0.018  | 0.018  | 0.0177 |
| 0.0546 | 0.0343 | 0.0277 | 0.0268 | 0.026  | 0.027  | 0.0258 | 0.0259 | 0.0264 |
| 0.0548 | 0.0338 | 0.0282 | 0.0259 | 0.0245 | 0.0266 | 0.0263 | 0.0259 | 0.0265 |
| 0.0914 | 0.0672 | 0.0608 | 0.0593 | 0.0601 | 0.0592 | 0.0601 | 0.0602 | 0.0609 |
| 0.1607 | 0.1487 | 0.1439 | 0.1478 | 0.1505 | 0.1529 | 0.1587 | 0.1562 | 0.1557 |
| 0.1826 | 0.2382 | 0.2313 | 0.2296 | 0.2351 | 0.2258 | 0.2325 | 0.2217 | 0.2147 |
| 0.1451 | 0.1919 | 0.1878 | 0.1948 | 0.199  | 0.1944 | 0.2051 | 0.1973 | 0.1947 |
| 0.1296 | 0.1814 | 0.1737 | 0.1746 | 0.1763 | 0.1686 | 0.1682 | 0.1567 | 0.1545 |
| 0.1536 | 0.3059 | 0.3003 | 0.3015 | 0.3021 | 0.2699 | 0.2636 | 0.2376 | 0.2379 |
| 0.1303 | 0.3149 | 0.3046 | 0.2778 | 0.2704 | 0.2208 | 0.2343 | 0.1962 | 0.183  |
| 0.0975 | 0.2189 | 0.209  | 0.2062 | 0.2073 | 0.1824 | 0.1763 | 0.1479 | 0.1524 |
| 0.0933 | 0.2224 | 0.2072 | 0.2074 | 0.2072 | 0.1837 | 0.1867 | 0.1694 | 0.1645 |
| 0.1259 | 0.2521 | 0.2353 | 0.2264 | 0.2288 | 0.214  | 0.2054 | 0.182  | 0.1851 |
| 0.0987 | 0.251  | 0.2446 | 0.2435 | 0.2474 | 0.2237 | 0.2303 | 0.2021 | 0.1875 |
| 0.0938 | 0.2323 | 0.2245 | 0.2171 | 0.2044 | 0.1754 | 0.1956 | 0.1579 | 0.1579 |
| 0.1093 | 0.2987 | 0.2954 | 0.292  | 0.291  | 0.2491 | 0.2516 | 0.2145 | 0.2168 |
| 0.1974 | 0.3232 | 0.3112 | 0.2992 | 0.2996 | 0.2552 | 0.252  | 0.2143 | 0.2251 |

|        |        |        |        |        |        |        |        |        |
|--------|--------|--------|--------|--------|--------|--------|--------|--------|
| 0.3712 | 0.292  | 0.2455 | 0.2276 | 0.2356 | 0.2337 | 0.2382 | 0.2342 | 0.2366 |
| 0.556  | 0.3217 | 0.2512 | 0.2378 | 0.2374 | 0.2419 | 0.255  | 0.262  | 0.261  |
| 0.6827 | 0.4212 | 0.318  | 0.2919 | 0.3186 | 0.3456 | 0.3359 | 0.3622 | 0.3689 |
| 0.4875 | 0.325  | 0.2662 | 0.2529 | 0.2414 | 0.2531 | 0.2476 | 0.2667 | 0.2728 |
| 0.3059 | 0.2029 | 0.1765 | 0.1733 | 0.174  | 0.1833 | 0.1843 | 0.1923 | 0.186  |
| 0.2627 | 0.2658 | 0.2374 | 0.2338 | 0.2277 | 0.2192 | 0.2104 | 0.1989 | 0.1984 |
| 0.1515 | 0.2925 | 0.2683 | 0.2488 | 0.2537 | 0.215  | 0.2295 | 0.206  | 0.2037 |
| 0.1267 | 0.3242 | 0.3127 | 0.3174 | 0.319  | 0.2816 | 0.2756 | 0.2275 | 0.229  |
| 0.1467 | 0.3088 | 0.3081 | 0.3101 | 0.2996 | 0.26   | 0.2727 | 0.224  | 0.2264 |
| 0.1391 | 0.2619 | 0.2391 | 0.2368 | 0.2194 | 0.1961 | 0.1831 | 0.1505 | 0.1571 |
| 0.1024 | 0.2521 | 0.2419 | 0.2408 | 0.2363 | 0.2241 | 0.2305 | 0.2019 | 0.1926 |
| 0.1432 | 0.3004 | 0.2875 | 0.2824 | 0.2881 | 0.2499 | 0.251  | 0.2175 | 0.2182 |
| 0.2808 | 0.3781 | 0.3387 | 0.3251 | 0.3241 | 0.2981 | 0.2748 | 0.2387 | 0.2421 |
| 0.1951 | 0.3489 | 0.3159 | 0.312  | 0.3078 | 0.2702 | 0.2604 | 0.2177 | 0.2034 |
| 0.14   | 0.3137 | 0.2878 | 0.2965 | 0.2896 | 0.2736 | 0.288  | 0.2428 | 0.234  |
| 0.1693 | 0.3512 | 0.3113 | 0.2988 | 0.2902 | 0.2404 | 0.2566 | 0.2184 | 0.2256 |
| 0.1027 | 0.272  | 0.2601 | 0.2575 | 0.2515 | 0.2366 | 0.213  | 0.171  | 0.1597 |
| 0.1443 | 0.295  | 0.2752 | 0.2635 | 0.2455 | 0.2166 | 0.2216 | 0.1907 | 0.1884 |
| 0.2495 | 0.3664 | 0.3385 | 0.3273 | 0.3195 | 0.3018 | 0.2999 | 0.2462 | 0.2314 |
| 0.2978 | 0.3316 | 0.3042 | 0.2936 | 0.2909 | 0.2664 | 0.2679 | 0.2328 | 0.2265 |
| 0.2771 | 0.3122 | 0.2814 | 0.2786 | 0.2784 | 0.2788 | 0.2698 | 0.2613 | 0.2546 |
| 0.2379 | 0.3601 | 0.333  | 0.3282 | 0.3171 | 0.2853 | 0.2702 | 0.2361 | 0.2299 |
| 0.174  | 0.3046 | 0.2809 | 0.2715 | 0.2616 | 0.2465 | 0.2384 | 0.2105 | 0.2044 |
| 0.187  | 0.3195 | 0.2931 | 0.2796 | 0.2754 | 0.2368 | 0.2298 | 0.1948 | 0.199  |
| 0.2595 | 0.3891 | 0.366  | 0.358  | 0.3454 | 0.3248 | 0.3099 | 0.253  | 0.2556 |
| 0.1126 | 0.2111 | 0.1882 | 0.1931 | 0.1978 | 0.177  | 0.1755 | 0.1582 | 0.1601 |
| 0.0153 | 0.0229 | 0.0207 | 0.0194 | 0.02   | 0.0187 | 0.0187 | 0.0168 | 0.0161 |
| 0.0796 | 0.0478 | 0.0379 | 0.0359 | 0.0362 | 0.0359 | 0.033  | 0.0312 | 0.0296 |
| 0      | 0      | 0      | 0      | 0      | 0      | 0      | 0      | 0      |
| 0      | 0      | 0      | 0      | 0      | 0      | 0      | 0      | 0      |
| 0.0014 | 0.0016 | 0.0021 | 0.0024 | 0.0025 | 0.0027 | 0.0031 | 0.0035 | 0.0036 |
| 0.0029 | 0.0069 | 0.0066 | 0.0062 | 0.0062 | 0.0053 | 0.0053 | 0.0044 | 0.004  |
| 0.0005 | 0.0006 | 0.0008 | 0.001  | 0.0011 | 0.0013 | 0.0015 | 0.0015 | 0.0016 |
| 0.026  | 0.0151 | 0.0123 | 0.0123 | 0.0122 | 0.0132 | 0.0129 | 0.0127 | 0.0127 |
| 0.0389 | 0.03   | 0.025  | 0.0245 | 0.024  | 0.0247 | 0.0237 | 0.0222 | 0.0215 |
| 0.0261 | 0.0157 | 0.0126 | 0.0124 | 0.0118 | 0.0119 | 0.0112 | 0.0114 | 0.0109 |
| 0.0388 | 0.0422 | 0.0408 | 0.0413 | 0.0422 | 0.0418 | 0.0431 | 0.042  | 0.0412 |
| 0.1073 | 0.145  | 0.1441 | 0.1459 | 0.1477 | 0.1436 | 0.1499 | 0.1421 | 0.1385 |
| 0.1057 | 0.2246 | 0.2193 | 0.2232 | 0.221  | 0.2081 | 0.206  | 0.1729 | 0.1614 |
| 0.2877 | 0.3048 | 0.2758 | 0.2813 | 0.2814 | 0.2632 | 0.2598 | 0.2336 | 0.2402 |
| 0.4674 | 0.4291 | 0.3916 | 0.3833 | 0.3766 | 0.356  | 0.3597 | 0.3348 | 0.3109 |
| 0.2464 | 0.3199 | 0.2903 | 0.2887 | 0.2876 | 0.2755 | 0.2518 | 0.2158 | 0.2137 |
| 0.0867 | 0.2252 | 0.2164 | 0.2284 | 0.227  | 0.2035 | 0.2149 | 0.1921 | 0.1788 |
| 0.0974 | 0.2141 | 0.2078 | 0.209  | 0.2137 | 0.193  | 0.1853 | 0.1539 | 0.1527 |

|        |        |        |        |        |        |        |        |        |
|--------|--------|--------|--------|--------|--------|--------|--------|--------|
| 0.1495 | 0.2704 | 0.2645 | 0.2535 | 0.2507 | 0.228  | 0.2312 | 0.1995 | 0.2002 |
| 0.0889 | 0.2221 | 0.211  | 0.2169 | 0.2104 | 0.1885 | 0.1888 | 0.1605 | 0.1606 |
| 0.1186 | 0.2069 | 0.1998 | 0.2039 | 0.2014 | 0.1915 | 0.1927 | 0.1745 | 0.178  |
| 0.1419 | 0.2572 | 0.241  | 0.2476 | 0.2366 | 0.2048 | 0.2022 | 0.1826 | 0.1777 |
| 0.1434 | 0.3239 | 0.3079 | 0.3033 | 0.2915 | 0.2669 | 0.2544 | 0.2014 | 0.1783 |
| 0.1974 | 0.3513 | 0.324  | 0.3103 | 0.3188 | 0.2824 | 0.2787 | 0.2287 | 0.2191 |
| 0.1203 | 0.2188 | 0.2145 | 0.2167 | 0.207  | 0.2004 | 0.1931 | 0.1742 | 0.1734 |
| 0.1473 | 0.178  | 0.1729 | 0.1733 | 0.1747 | 0.1681 | 0.1724 | 0.1611 | 0.1581 |
| 0.2204 | 0.2344 | 0.2199 | 0.2199 | 0.2238 | 0.2232 | 0.2303 | 0.2234 | 0.2182 |
| 0.1232 | 0.1473 | 0.1426 | 0.1436 | 0.1474 | 0.1452 | 0.151  | 0.1455 | 0.1436 |
| 0.1819 | 0.2131 | 0.1961 | 0.1951 | 0.1934 | 0.1805 | 0.1838 | 0.1725 | 0.1717 |
| 0.2725 | 0.3277 | 0.2995 | 0.289  | 0.2866 | 0.2598 | 0.2494 | 0.2272 | 0.2178 |
| 0.1815 | 0.3285 | 0.2902 | 0.2856 | 0.3021 | 0.2573 | 0.268  | 0.2311 | 0.2263 |
| 0.1291 | 0.3388 | 0.3193 | 0.3088 | 0.3068 | 0.2829 | 0.2715 | 0.2274 | 0.2296 |
| 0.1684 | 0.303  | 0.2934 | 0.2769 | 0.2669 | 0.2396 | 0.2467 | 0.2077 | 0.2082 |
| 0.1332 | 0.1883 | 0.1862 | 0.1895 | 0.1938 | 0.1884 | 0.1928 | 0.1847 | 0.1821 |
| 0.0791 | 0.1559 | 0.1644 | 0.1719 | 0.174  | 0.1687 | 0.1823 | 0.1802 | 0.1749 |
| 0.1463 | 0.2728 | 0.2688 | 0.2674 | 0.2677 | 0.2416 | 0.2511 | 0.2201 | 0.2184 |
| 0.4051 | 0.4186 | 0.3871 | 0.3887 | 0.3831 | 0.3622 | 0.3484 | 0.3165 | 0.3166 |
| 0.268  | 0.3682 | 0.3415 | 0.3195 | 0.2934 | 0.262  | 0.245  | 0.208  | 0.2101 |
| 0.1156 | 0.2706 | 0.2486 | 0.2491 | 0.2556 | 0.2232 | 0.2117 | 0.1824 | 0.1971 |
| 0.1014 | 0.2446 | 0.2323 | 0.2308 | 0.238  | 0.2165 | 0.2165 | 0.1899 | 0.1877 |
| 0.071  | 0.2189 | 0.2161 | 0.2165 | 0.2144 | 0.1965 | 0.2049 | 0.1822 | 0.1773 |
| 0.1515 | 0.2794 | 0.2613 | 0.2669 | 0.2669 | 0.2502 | 0.2555 | 0.228  | 0.2202 |
| 0.3413 | 0.3751 | 0.3253 | 0.3211 | 0.3206 | 0.3064 | 0.2942 | 0.2583 | 0.2647 |
| 0.4622 | 0.4194 | 0.3595 | 0.3756 | 0.3773 | 0.357  | 0.3449 | 0.329  | 0.3137 |
| 0.3187 | 0.3796 | 0.3365 | 0.3044 | 0.2982 | 0.2753 | 0.28   | 0.2524 | 0.2523 |
| 0.221  | 0.3514 | 0.3302 | 0.331  | 0.3212 | 0.2792 | 0.273  | 0.2257 | 0.2174 |
| 0.13   | 0.2881 | 0.2716 | 0.2581 | 0.2522 | 0.2076 | 0.1993 | 0.1688 | 0.1767 |
| 0.128  | 0.2712 | 0.2554 | 0.2633 | 0.2697 | 0.2302 | 0.2334 | 0.1995 | 0.1957 |
| 0.147  | 0.2519 | 0.2296 | 0.2153 | 0.2117 | 0.1876 | 0.1893 | 0.1687 | 0.1604 |
| 0.0464 | 0.126  | 0.1228 | 0.1237 | 0.1294 | 0.1102 | 0.1168 | 0.1035 | 0.0999 |
| 0.0073 | 0.0234 | 0.0221 | 0.0211 | 0.0208 | 0.0179 | 0.017  | 0.0128 | 0.0131 |
| 0.0683 | 0.0426 | 0.0358 | 0.0357 | 0.0348 | 0.0367 | 0.0342 | 0.0339 | 0.0318 |
| 0      | 0      | 0      | 0      | 0      | 0      | 0      | 0      | 0      |
| 0      | 0      | 0      | 0      | 0      | 0      | 0      | 0      | 0      |
| 0.0019 | 0.0024 | 0.0029 | 0.0032 | 0.0035 | 0.0036 | 0.0039 | 0.0042 | 0.0043 |
| 0.0032 | 0.0086 | 0.0081 | 0.0081 | 0.0079 | 0.0068 | 0.007  | 0.0058 | 0.0052 |
| 0      | 0      | 0      | 0      | 0      | 0      | 0      | 0      | 0      |
| 0.0256 | 0.0153 | 0.0115 | 0.0107 | 0.0114 | 0.0114 | 0.0114 | 0.0113 | 0.0108 |
| 0.036  | 0.0271 | 0.0238 | 0.0228 | 0.0225 | 0.0231 | 0.0225 | 0.0217 | 0.0217 |
| 0.0149 | 0.0084 | 0.0065 | 0.0063 | 0.0064 | 0.0064 | 0.0064 | 0.0059 | 0.006  |
| 0.0163 | 0.0252 | 0.0237 | 0.0247 | 0.0241 | 0.0226 | 0.0229 | 0.0212 | 0.0209 |
| 0.0644 | 0.1067 | 0.1069 | 0.1117 | 0.1157 | 0.1108 | 0.1143 | 0.105  | 0.103  |



|        |        |        |        |        |        |        |        |        |
|--------|--------|--------|--------|--------|--------|--------|--------|--------|
| 0.0571 | 0.1259 | 0.1312 | 0.1352 | 0.1378 | 0.1307 | 0.1356 | 0.1238 | 0.1251 |
| 0.3218 | 0.2997 | 0.2549 | 0.2513 | 0.254  | 0.2331 | 0.2363 | 0.2199 | 0.2171 |
| 0.4207 | 0.4279 | 0.3763 | 0.3804 | 0.3876 | 0.3668 | 0.3546 | 0.314  | 0.2891 |
| 0.2646 | 0.3081 | 0.2839 | 0.2791 | 0.2827 | 0.2716 | 0.2664 | 0.2422 | 0.2346 |
| 0.078  | 0.1726 | 0.1755 | 0.1738 | 0.1803 | 0.1681 | 0.1735 | 0.1516 | 0.1501 |
| 0.1154 | 0.2363 | 0.2316 | 0.2289 | 0.2288 | 0.2094 | 0.2147 | 0.1934 | 0.1924 |
| 0.15   | 0.223  | 0.2148 | 0.2139 | 0.2197 | 0.1946 | 0.2008 | 0.1796 | 0.1804 |
| 0.0875 | 0.1581 | 0.1611 | 0.1694 | 0.1752 | 0.1729 | 0.1778 | 0.1711 | 0.1661 |
| 0.0878 | 0.1753 | 0.1743 | 0.1808 | 0.1822 | 0.1772 | 0.1855 | 0.1663 | 0.1617 |
| 0.1366 | 0.2924 | 0.2756 | 0.2816 | 0.2804 | 0.2515 | 0.2416 | 0.2162 | 0.2182 |
| 0.2195 | 0.3919 | 0.3571 | 0.344  | 0.3423 | 0.3135 | 0.3158 | 0.266  | 0.265  |
| 0.1141 | 0.2864 | 0.2819 | 0.262  | 0.2544 | 0.2256 | 0.2265 | 0.2087 | 0.2011 |
| 0.0813 | 0.2332 | 0.218  | 0.2151 | 0.2177 | 0.2025 | 0.1999 | 0.1782 | 0.1631 |
| 0.0799 | 0.2212 | 0.229  | 0.2263 | 0.2189 | 0.1991 | 0.2028 | 0.1811 | 0.1774 |
| 0.0776 | 0.1989 | 0.2    | 0.2007 | 0.2061 | 0.1925 | 0.2048 | 0.1914 | 0.189  |
| 0.0878 | 0.1908 | 0.1871 | 0.1876 | 0.1831 | 0.1731 | 0.1793 | 0.1574 | 0.1457 |
| 0.0943 | 0.2233 | 0.2204 | 0.2238 | 0.2301 | 0.2026 | 0.1986 | 0.1726 | 0.1734 |
| 0.2611 | 0.3737 | 0.3538 | 0.3486 | 0.3415 | 0.2927 | 0.315  | 0.285  | 0.2808 |
| 0.1602 | 0.3142 | 0.2823 | 0.2854 | 0.2897 | 0.2768 | 0.2677 | 0.2304 | 0.2212 |
| 0.0997 | 0.2906 | 0.2917 | 0.3061 | 0.284  | 0.2451 | 0.2372 | 0.1903 | 0.1927 |
| 0.1572 | 0.2976 | 0.2784 | 0.2707 | 0.2663 | 0.2354 | 0.228  | 0.1892 | 0.1871 |
| 0.115  | 0.148  | 0.148  | 0.1565 | 0.1638 | 0.1679 | 0.1771 | 0.1705 | 0.1696 |
| 0.0458 | 0.0684 | 0.0888 | 0.1067 | 0.1187 | 0.1287 | 0.146  | 0.1529 | 0.1482 |
| 0.13   | 0.2171 | 0.2128 | 0.2133 | 0.2169 | 0.2024 | 0.2046 | 0.1889 | 0.1871 |
| 0.1535 | 0.3036 | 0.2823 | 0.2641 | 0.2728 | 0.2456 | 0.2483 | 0.2042 | 0.2143 |
| 0.09   | 0.2244 | 0.2245 | 0.2232 | 0.2184 | 0.1942 | 0.1933 | 0.1562 | 0.1619 |
| 0.1065 | 0.1827 | 0.1784 | 0.1804 | 0.1819 | 0.1727 | 0.1741 | 0.1546 | 0.1528 |
| 0.1954 | 0.2426 | 0.2284 | 0.222  | 0.2203 | 0.1983 | 0.1978 | 0.184  | 0.1832 |
| 0.164  | 0.2714 | 0.2584 | 0.2567 | 0.2514 | 0.232  | 0.2345 | 0.2118 | 0.208  |
| 0.1067 | 0.2421 | 0.227  | 0.2163 | 0.2172 | 0.183  | 0.1833 | 0.1461 | 0.1487 |
| 0.2304 | 0.3473 | 0.3257 | 0.3075 | 0.3085 | 0.2669 | 0.2556 | 0.2253 | 0.2161 |
| 0.3274 | 0.3708 | 0.3276 | 0.3051 | 0.2907 | 0.2626 | 0.2659 | 0.2449 | 0.2518 |
| 0.1768 | 0.2879 | 0.2561 | 0.2494 | 0.2443 | 0.2093 | 0.2156 | 0.1777 | 0.1738 |
| 0.1216 | 0.269  | 0.2455 | 0.2487 | 0.233  | 0.2111 | 0.2152 | 0.177  | 0.1702 |
| 0.1256 | 0.3119 | 0.3032 | 0.3004 | 0.3084 | 0.2553 | 0.2517 | 0.2006 | 0.1941 |
| 0.1641 | 0.3164 | 0.2999 | 0.2913 | 0.2967 | 0.2553 | 0.267  | 0.2377 | 0.2163 |
| 0.1779 | 0.2871 | 0.2714 | 0.2752 | 0.2792 | 0.2399 | 0.2345 | 0.1998 | 0.1929 |
| 0.1076 | 0.1987 | 0.1913 | 0.1907 | 0.1985 | 0.1722 | 0.1696 | 0.1465 | 0.1486 |
| 0.0219 | 0.0434 | 0.0364 | 0.0355 | 0.0359 | 0.0303 | 0.0291 | 0.0251 | 0.0252 |
| 0.0741 | 0.0415 | 0.0329 | 0.0298 | 0.0305 | 0.032  | 0.0296 | 0.0312 | 0.0315 |
| 0      | 0      | 0      | 0      | 0      | 0      | 0      | 0      | 0      |
| 0      | 0      | 0      | 0      | 0      | 0      | 0      | 0      | 0      |
| 0.01   | 0.0069 | 0.0061 | 0.0063 | 0.0064 | 0.0067 | 0.007  | 0.0073 | 0.0074 |
| 0.0093 | 0.0094 | 0.0086 | 0.0085 | 0.0086 | 0.0079 | 0.0076 | 0.0065 | 0.0066 |

|        |        |        |        |        |        |        |        |        |
|--------|--------|--------|--------|--------|--------|--------|--------|--------|
| 0.0266 | 0.0169 | 0.0142 | 0.014  | 0.0139 | 0.0134 | 0.0122 | 0.0126 | 0.0131 |
| 0.042  | 0.0241 | 0.0198 | 0.0181 | 0.0185 | 0.0176 | 0.0149 | 0.0164 | 0.0159 |
| 0.0352 | 0.022  | 0.0172 | 0.0176 | 0.0173 | 0.0197 | 0.0186 | 0.0191 | 0.0184 |
| 0.017  | 0.0108 | 0.0088 | 0.0085 | 0.0086 | 0.0086 | 0.0084 | 0.0083 | 0.0085 |
| 0.027  | 0.0201 | 0.0168 | 0.0166 | 0.0169 | 0.0158 | 0.0144 | 0.0133 | 0.0137 |
| 0.082  | 0.0872 | 0.0804 | 0.0802 | 0.08   | 0.077  | 0.0763 | 0.0695 | 0.0677 |
| 0.2206 | 0.143  | 0.1269 | 0.1312 | 0.1301 | 0.1355 | 0.1373 | 0.1452 | 0.1439 |
| 0.1775 | 0.1709 | 0.1534 | 0.1494 | 0.1501 | 0.1412 | 0.1365 | 0.1299 | 0.1236 |
| 0.1578 | 0.2643 | 0.2353 | 0.2284 | 0.2355 | 0.213  | 0.2166 | 0.1806 | 0.1804 |
| 0.138  | 0.255  | 0.2349 | 0.2311 | 0.2307 | 0.2039 | 0.2056 | 0.1796 | 0.1751 |
| 0.1155 | 0.2186 | 0.223  | 0.2253 | 0.239  | 0.2145 | 0.2078 | 0.1834 | 0.1863 |
| 0.0899 | 0.2337 | 0.2314 | 0.2249 | 0.2216 | 0.1895 | 0.1906 | 0.161  | 0.148  |
| 0.0982 | 0.1971 | 0.1917 | 0.196  | 0.1919 | 0.1791 | 0.1873 | 0.1672 | 0.1635 |
| 0.1191 | 0.1607 | 0.1608 | 0.162  | 0.1699 | 0.1709 | 0.1807 | 0.1753 | 0.1749 |
| 0.1121 | 0.2416 | 0.2308 | 0.2258 | 0.2263 | 0.206  | 0.2103 | 0.1932 | 0.1881 |
| 0.1002 | 0.3022 | 0.2799 | 0.2837 | 0.2883 | 0.2762 | 0.2685 | 0.2003 | 0.19   |
| 0.1192 | 0.2712 | 0.2588 | 0.2585 | 0.2581 | 0.2309 | 0.2284 | 0.1964 | 0.1899 |
| 0.0745 | 0.1891 | 0.1856 | 0.1832 | 0.1847 | 0.167  | 0.1767 | 0.1577 | 0.1505 |
| 0.1211 | 0.234  | 0.2228 | 0.2308 | 0.2302 | 0.2037 | 0.1995 | 0.18   | 0.1728 |
| 0.2332 | 0.3164 | 0.2862 | 0.2855 | 0.276  | 0.2559 | 0.251  | 0.2239 | 0.2115 |
| 0.1178 | 0.2398 | 0.2353 | 0.236  | 0.2447 | 0.2101 | 0.216  | 0.1891 | 0.1897 |
| 0.1673 | 0.2986 | 0.2729 | 0.2693 | 0.2641 | 0.2337 | 0.2269 | 0.1957 | 0.1869 |
| 0.0726 | 0.2264 | 0.2124 | 0.2125 | 0.2077 | 0.2042 | 0.2065 | 0.1722 | 0.171  |
| 0.173  | 0.3155 | 0.305  | 0.3068 | 0.3033 | 0.2747 | 0.2795 | 0.2351 | 0.2152 |
| 0.1443 | 0.2936 | 0.2779 | 0.2641 | 0.2699 | 0.2283 | 0.2311 | 0.1851 | 0.1882 |
| 0.0885 | 0.2632 | 0.2454 | 0.2319 | 0.2418 | 0.2106 | 0.2062 | 0.1771 | 0.1834 |
| 0.1088 | 0.2866 | 0.2611 | 0.2543 | 0.2524 | 0.2249 | 0.221  | 0.1766 | 0.1788 |
| 0.1066 | 0.1848 | 0.1807 | 0.187  | 0.1904 | 0.1831 | 0.1936 | 0.1769 | 0.174  |
| 0.0729 | 0.1048 | 0.1121 | 0.1297 | 0.1407 | 0.1476 | 0.1646 | 0.1638 | 0.1589 |
| 0.0844 | 0.1509 | 0.1486 | 0.1518 | 0.1553 | 0.1496 | 0.1541 | 0.1363 | 0.136  |
| 0.0895 | 0.2438 | 0.2424 | 0.236  | 0.2291 | 0.2075 | 0.2197 | 0.1865 | 0.1909 |
| 0.0614 | 0.2002 | 0.2023 | 0.2117 | 0.2019 | 0.175  | 0.1746 | 0.16   | 0.1535 |
| 0.1185 | 0.2162 | 0.2009 | 0.2012 | 0.2082 | 0.1912 | 0.1979 | 0.177  | 0.1729 |
| 0.194  | 0.3013 | 0.2739 | 0.2856 | 0.2793 | 0.2451 | 0.2425 | 0.2056 | 0.2087 |
| 0.1633 | 0.3216 | 0.3077 | 0.2881 | 0.2958 | 0.2629 | 0.2518 | 0.2199 | 0.2115 |
| 0.1033 | 0.2756 | 0.2796 | 0.27   | 0.2824 | 0.2459 | 0.2397 | 0.1944 | 0.185  |
| 0.0624 | 0.2309 | 0.2348 | 0.2379 | 0.2391 | 0.2068 | 0.2093 | 0.1889 | 0.194  |
| 0.1041 | 0.244  | 0.2223 | 0.2168 | 0.2131 | 0.1846 | 0.1746 | 0.1537 | 0.1382 |
| 0.1123 | 0.2229 | 0.2204 | 0.2139 | 0.206  | 0.1806 | 0.1743 | 0.1395 | 0.1317 |
| 0.0645 | 0.1664 | 0.1662 | 0.1671 | 0.175  | 0.1567 | 0.164  | 0.1436 | 0.1385 |
| 0.1319 | 0.2601 | 0.2448 | 0.2421 | 0.249  | 0.2312 | 0.2379 | 0.2057 | 0.2011 |
| 0.1726 | 0.296  | 0.2849 | 0.2733 | 0.2707 | 0.2415 | 0.2379 | 0.2181 | 0.2123 |
| 0.2205 | 0.3715 | 0.3463 | 0.3325 | 0.34   | 0.3009 | 0.2863 | 0.2551 | 0.2653 |
| 0.1816 | 0.298  | 0.2717 | 0.2578 | 0.2635 | 0.2464 | 0.2553 | 0.227  | 0.2228 |

|        |        |        |        |        |        |        |        |        |
|--------|--------|--------|--------|--------|--------|--------|--------|--------|
| 0.056  | 0.0526 | 0.0448 | 0.0438 | 0.0431 | 0.0411 | 0.0406 | 0.0373 | 0.0395 |
| 0.1046 | 0.0618 | 0.0501 | 0.0457 | 0.0446 | 0.0439 | 0.0433 | 0.0452 | 0.0464 |
| 0      | 0      | 0      | 0      | 0      | 0      | 0      | 0      | 0      |
| 0      | 0      | 0      | 0      | 0      | 0      | 0      | 0      | 0      |
| 0.0018 | 0.0037 | 0.004  | 0.0042 | 0.0043 | 0.0044 | 0.0046 | 0.0042 | 0.0041 |
| 0.0088 | 0.0055 | 0.0046 | 0.0042 | 0.0043 | 0.0046 | 0.0047 | 0.0045 | 0.0044 |
| 0.0367 | 0.022  | 0.0183 | 0.0173 | 0.017  | 0.0183 | 0.0176 | 0.0174 | 0.0175 |
| 0.0449 | 0.0277 | 0.0224 | 0.0221 | 0.0209 | 0.0205 | 0.0195 | 0.021  | 0.0197 |
| 0.018  | 0.0105 | 0.0086 | 0.0086 | 0.0089 | 0.0088 | 0.0082 | 0.0079 | 0.0078 |
| 0.0018 | 0.002  | 0.0026 | 0.0031 | 0.0032 | 0.0037 | 0.004  | 0.0044 | 0.0046 |
| 0.0261 | 0.0166 | 0.014  | 0.0123 | 0.013  | 0.0133 | 0.0126 | 0.0137 | 0.0141 |
| 0.0902 | 0.0603 | 0.0491 | 0.0489 | 0.0469 | 0.0443 | 0.0423 | 0.0444 | 0.0434 |
| 0.2794 | 0.1934 | 0.1661 | 0.1598 | 0.1543 | 0.1535 | 0.1567 | 0.1474 | 0.1399 |
| 0.114  | 0.1501 | 0.1443 | 0.1503 | 0.139  | 0.1244 | 0.1277 | 0.1124 | 0.1129 |
| 0.0677 | 0.2141 | 0.2066 | 0.206  | 0.1962 | 0.1816 | 0.1826 | 0.166  | 0.165  |
| 0.0853 | 0.25   | 0.2442 | 0.2427 | 0.2515 | 0.2231 | 0.2407 | 0.1985 | 0.1998 |
| 0.1085 | 0.2645 | 0.2654 | 0.2628 | 0.2559 | 0.2275 | 0.2401 | 0.2084 | 0.2088 |
| 0.1196 | 0.2928 | 0.2785 | 0.2592 | 0.2798 | 0.2477 | 0.2435 | 0.2012 | 0.1977 |
| 0.0905 | 0.2382 | 0.2238 | 0.2383 | 0.2371 | 0.2093 | 0.2104 | 0.1905 | 0.186  |
| 0.1147 | 0.2007 | 0.1935 | 0.1917 | 0.1875 | 0.1809 | 0.1866 | 0.1686 | 0.167  |
| 0.1809 | 0.318  | 0.2873 | 0.2829 | 0.2847 | 0.249  | 0.2547 | 0.2129 | 0.2102 |
| 0.0961 | 0.2668 | 0.2411 | 0.2214 | 0.2336 | 0.205  | 0.2026 | 0.1674 | 0.1668 |
| 0.1332 | 0.228  | 0.2161 | 0.2105 | 0.2087 | 0.1925 | 0.1924 | 0.1748 | 0.1767 |
| 0.0596 | 0.1253 | 0.1321 | 0.1434 | 0.148  | 0.1433 | 0.1509 | 0.1384 | 0.1416 |
| 0.1539 | 0.2013 | 0.1946 | 0.196  | 0.2004 | 0.1919 | 0.1982 | 0.1875 | 0.1861 |
| 0.3239 | 0.3497 | 0.319  | 0.3148 | 0.3136 | 0.2927 | 0.2895 | 0.2593 | 0.2519 |
| 0.1616 | 0.3221 | 0.3005 | 0.3043 | 0.3023 | 0.2695 | 0.2513 | 0.2072 | 0.2155 |
| 0.1063 | 0.2943 | 0.268  | 0.2755 | 0.2628 | 0.2289 | 0.2477 | 0.1943 | 0.1916 |
| 0.1362 | 0.293  | 0.2857 | 0.3075 | 0.2897 | 0.2463 | 0.2502 | 0.2105 | 0.2145 |
| 0.1254 | 0.3118 | 0.2981 | 0.2824 | 0.2842 | 0.2492 | 0.2515 | 0.1954 | 0.1959 |
| 0.1275 | 0.2813 | 0.2636 | 0.2648 | 0.2555 | 0.2315 | 0.2293 | 0.1802 | 0.1855 |
| 0.1561 | 0.3056 | 0.2907 | 0.2914 | 0.2953 | 0.2602 | 0.2573 | 0.2125 | 0.207  |
| 0.0964 | 0.2803 | 0.2547 | 0.244  | 0.2338 | 0.2072 | 0.1981 | 0.1668 | 0.1676 |
| 0.1245 | 0.2887 | 0.2802 | 0.2788 | 0.2568 | 0.2251 | 0.2152 | 0.1851 | 0.1746 |
| 0.1242 | 0.2325 | 0.2267 | 0.229  | 0.231  | 0.2089 | 0.2053 | 0.1864 | 0.1828 |
| 0.1036 | 0.2296 | 0.2255 | 0.2341 | 0.2278 | 0.2086 | 0.2141 | 0.1903 | 0.1822 |
| 0.1526 | 0.2524 | 0.2354 | 0.2314 | 0.2242 | 0.2061 | 0.2161 | 0.2017 | 0.1996 |
| 0.0987 | 0.2147 | 0.1969 | 0.1925 | 0.1985 | 0.1808 | 0.1868 | 0.1697 | 0.1586 |
| 0.1291 | 0.2465 | 0.2268 | 0.2311 | 0.2264 | 0.2064 | 0.208  | 0.1837 | 0.185  |
| 0.1401 | 0.2928 | 0.2895 | 0.2718 | 0.2621 | 0.2294 | 0.232  | 0.201  | 0.1963 |
| 0.0709 | 0.2512 | 0.2483 | 0.2599 | 0.2564 | 0.2074 | 0.2019 | 0.1447 | 0.1586 |
| 0.1339 | 0.2991 | 0.2618 | 0.2592 | 0.2501 | 0.2163 | 0.2105 | 0.1668 | 0.1493 |
| 0.1443 | 0.3045 | 0.2882 | 0.2774 | 0.2799 | 0.2509 | 0.2539 | 0.2086 | 0.2059 |
| 0.1066 | 0.2622 | 0.2529 | 0.2474 | 0.2399 | 0.204  | 0.1983 | 0.1648 | 0.1544 |

|        |        |        |        |        |        |        |        |        |
|--------|--------|--------|--------|--------|--------|--------|--------|--------|
| 0.1024 | 0.2334 | 0.2251 | 0.2169 | 0.2163 | 0.1918 | 0.1888 | 0.1591 | 0.1664 |
| 0.1062 | 0.2049 | 0.1988 | 0.1912 | 0.1927 | 0.1819 | 0.1816 | 0.1581 | 0.1597 |
| 0.0922 | 0.2073 | 0.1961 | 0.196  | 0.1905 | 0.1676 | 0.1631 | 0.1443 | 0.1394 |
| 0.1842 | 0.3177 | 0.2995 | 0.2927 | 0.286  | 0.2545 | 0.2486 | 0.2041 | 0.2008 |
| 0.2142 | 0.3668 | 0.3465 | 0.339  | 0.3418 | 0.3074 | 0.3123 | 0.2787 | 0.2957 |
| 0.143  | 0.2725 | 0.2629 | 0.2636 | 0.2488 | 0.2255 | 0.2204 | 0.1778 | 0.1897 |
| 0.0547 | 0.0364 | 0.0311 | 0.0313 | 0.0312 | 0.0299 | 0.0288 | 0.0291 | 0.0296 |
| 0.0987 | 0.0609 | 0.0498 | 0.0485 | 0.0474 | 0.0482 | 0.0428 | 0.0437 | 0.0415 |
| 0      | 0      | 0      | 0      | 0      | 0      | 0      | 0      | 0      |
| 0      | 0      | 0      | 0      | 0      | 0      | 0      | 0      | 0      |
| 0.0017 | 0.0043 | 0.0042 | 0.004  | 0.0041 | 0.0037 | 0.0037 | 0.0032 | 0.0031 |
| 0      | 0      | 0      | 0      | 0      | 0      | 0      | 0      | 0      |
| 0.0106 | 0.0076 | 0.0072 | 0.0075 | 0.0079 | 0.0085 | 0.0087 | 0.009  | 0.0089 |
| 0.0193 | 0.0152 | 0.0135 | 0.0128 | 0.0126 | 0.0119 | 0.0118 | 0.0111 | 0.0108 |
| 0      | 0      | 0      | 0      | 0      | 0      | 0      | 0      | 0      |
| 0.0046 | 0.0089 | 0.0097 | 0.0104 | 0.0109 | 0.0106 | 0.0114 | 0.0106 | 0.0105 |
| 0.0032 | 0.0083 | 0.0083 | 0.0081 | 0.0081 | 0.0071 | 0.0068 | 0.006  | 0.0056 |
| 0.0741 | 0.0429 | 0.0356 | 0.0325 | 0.0345 | 0.0351 | 0.0378 | 0.0359 | 0.0371 |
| 0.1335 | 0.089  | 0.0763 | 0.0707 | 0.074  | 0.0747 | 0.0727 | 0.0711 | 0.072  |
| 0.1492 | 0.1899 | 0.1752 | 0.1738 | 0.1754 | 0.1621 | 0.1596 | 0.1512 | 0.1504 |
| 0.1389 | 0.2623 | 0.2535 | 0.2553 | 0.26   | 0.2446 | 0.2442 | 0.2124 | 0.2067 |
| 0.0827 | 0.2413 | 0.2339 | 0.2375 | 0.2366 | 0.2079 | 0.2057 | 0.1811 | 0.179  |
| 0.0993 | 0.2641 | 0.2691 | 0.2655 | 0.2557 | 0.2331 | 0.2253 | 0.1931 | 0.1936 |
| 0.0991 | 0.2864 | 0.2794 | 0.2774 | 0.2799 | 0.2524 | 0.2465 | 0.2166 | 0.2198 |
| 0.133  | 0.291  | 0.2754 | 0.2628 | 0.2531 | 0.2296 | 0.2285 | 0.2019 | 0.1914 |
| 0.0757 | 0.1759 | 0.1711 | 0.1822 | 0.1815 | 0.1706 | 0.1714 | 0.1574 | 0.1518 |
| 0.0908 | 0.1948 | 0.1921 | 0.1897 | 0.1904 | 0.1816 | 0.1868 | 0.1632 | 0.1616 |
| 0.0629 | 0.149  | 0.1429 | 0.1433 | 0.1453 | 0.131  | 0.1311 | 0.1116 | 0.1058 |
| 0.1774 | 0.2069 | 0.1976 | 0.1929 | 0.1929 | 0.1866 | 0.1897 | 0.1767 | 0.1697 |
| 0.0811 | 0.146  | 0.1476 | 0.1562 | 0.1559 | 0.1549 | 0.1638 | 0.1535 | 0.151  |
| 0.1613 | 0.1927 | 0.1871 | 0.1867 | 0.1878 | 0.1834 | 0.1909 | 0.1824 | 0.1821 |
| 0.3291 | 0.3543 | 0.3256 | 0.3117 | 0.315  | 0.2875 | 0.2809 | 0.2518 | 0.2527 |
| 0.205  | 0.3591 | 0.3458 | 0.3442 | 0.3267 | 0.2908 | 0.2682 | 0.2233 | 0.2119 |
| 0.1377 | 0.3097 | 0.2877 | 0.2726 | 0.255  | 0.2287 | 0.2031 | 0.1512 | 0.1323 |
| 0.1911 | 0.3212 | 0.299  | 0.2854 | 0.287  | 0.2522 | 0.251  | 0.2181 | 0.2222 |
| 0.0631 | 0.1998 | 0.2019 | 0.1969 | 0.1951 | 0.1741 | 0.1834 | 0.1589 | 0.161  |
| 0.0919 | 0.2144 | 0.2035 | 0.2034 | 0.2058 | 0.1816 | 0.1821 | 0.1597 | 0.1615 |
| 0.2134 | 0.328  | 0.2984 | 0.2874 | 0.2858 | 0.2611 | 0.268  | 0.2447 | 0.2427 |
| 0.1323 | 0.313  | 0.3012 | 0.3041 | 0.2979 | 0.2517 | 0.237  | 0.1902 | 0.1727 |
| 0.1058 | 0.2819 | 0.2649 | 0.2482 | 0.257  | 0.2229 | 0.2028 | 0.174  | 0.1714 |
| 0.1684 | 0.3327 | 0.3078 | 0.2945 | 0.2975 | 0.2616 | 0.2581 | 0.2224 | 0.2047 |
| 0.1098 | 0.2679 | 0.2517 | 0.2536 | 0.2402 | 0.2116 | 0.1949 | 0.1702 | 0.1672 |
| 0.1147 | 0.2691 | 0.248  | 0.2401 | 0.2418 | 0.2067 | 0.2081 | 0.17   | 0.1598 |
| 0.0906 | 0.1896 | 0.191  | 0.1968 | 0.195  | 0.1869 | 0.1937 | 0.178  | 0.177  |

|        |        |        |        |        |        |        |        |        |
|--------|--------|--------|--------|--------|--------|--------|--------|--------|
| 0.0906 | 0.128  | 0.1385 | 0.1463 | 0.1505 | 0.1504 | 0.1637 | 0.1612 | 0.1632 |
| 0.0803 | 0.159  | 0.1639 | 0.1671 | 0.1739 | 0.1666 | 0.1745 | 0.1665 | 0.1608 |
| 0.0841 | 0.2285 | 0.2211 | 0.2193 | 0.215  | 0.1828 | 0.1846 | 0.1493 | 0.1506 |
| 0.1215 | 0.2751 | 0.2595 | 0.2766 | 0.2827 | 0.2427 | 0.2451 | 0.2153 | 0.1955 |
| 0.2196 | 0.346  | 0.3199 | 0.3174 | 0.312  | 0.2817 | 0.2619 | 0.2091 | 0.1869 |
| 0.1186 | 0.2784 | 0.2491 | 0.2576 | 0.2648 | 0.222  | 0.2309 | 0.1958 | 0.1867 |
| 0.1808 | 0.3297 | 0.3079 | 0.2916 | 0.2794 | 0.2464 | 0.2537 | 0.1865 | 0.1764 |
| 0.1125 | 0.2481 | 0.2289 | 0.2266 | 0.2248 | 0.202  | 0.1868 | 0.1624 | 0.1613 |
| 0.0947 | 0.256  | 0.2406 | 0.2516 | 0.2581 | 0.2221 | 0.2331 | 0.1933 | 0.1991 |
| 0.101  | 0.2835 | 0.271  | 0.2656 | 0.2516 | 0.2203 | 0.2104 | 0.1838 | 0.1828 |
| 0.1643 | 0.3363 | 0.3181 | 0.3145 | 0.315  | 0.2775 | 0.2609 | 0.2099 | 0.1917 |
| 0.0816 | 0.2106 | 0.207  | 0.2034 | 0.1994 | 0.1837 | 0.1879 | 0.1575 | 0.1522 |
| 0.0124 | 0.0156 | 0.0142 | 0.0136 | 0.0131 | 0.0118 | 0.0115 | 0.0099 | 0.01   |
| 0.0777 | 0.0573 | 0.0467 | 0.0466 | 0.0466 | 0.0474 | 0.0463 | 0.0451 | 0.0456 |
| 0      | 0      | 0      | 0      | 0      | 0      | 0      | 0      | 0      |
| 0      | 0      | 0      | 0      | 0      | 0      | 0      | 0      | 0      |
| 0      | 0      | 0      | 0      | 0      | 0      | 0      | 0      | 0      |
| 0      | 0      | 0      | 0      | 0      | 0      | 0      | 0      | 0      |
| 0      | 0      | 0      | 0      | 0      | 0      | 0      | 0      | 0      |
| 0      | 0      | 0      | 0      | 0      | 0      | 0      | 0      | 0      |
| 0      | 0      | 0      | 0      | 0      | 0      | 0      | 0      | 0      |
| 0      | 0      | 0      | 0      | 0      | 0      | 0      | 0      | 0      |
| 0      | 0      | 0      | 0      | 0      | 0      | 0      | 0      | 0      |
| 0      | 0      | 0      | 0      | 0      | 0      | 0      | 0      | 0      |
| 0.0006 | 0.0009 | 0.0011 | 0.0013 | 0.0013 | 0.0014 | 0.0015 | 0.0015 | 0.0015 |
| 0.0252 | 0.0542 | 0.0523 | 0.0521 | 0.0528 | 0.049  | 0.0488 | 0.0425 | 0.0424 |
| 0.0892 | 0.1554 | 0.151  | 0.1508 | 0.1497 | 0.1387 | 0.1394 | 0.1241 | 0.1187 |
| 0.4809 | 0.4436 | 0.4019 | 0.3798 | 0.3782 | 0.3698 | 0.3596 | 0.3382 | 0.3475 |
| 0.2882 | 0.3387 | 0.3011 | 0.2934 | 0.2918 | 0.2637 | 0.2583 | 0.2326 | 0.2342 |
| 0.0886 | 0.2104 | 0.2    | 0.1905 | 0.1915 | 0.1592 | 0.1638 | 0.1344 | 0.1328 |
| 0.2625 | 0.2909 | 0.2568 | 0.2491 | 0.258  | 0.2412 | 0.2335 | 0.2004 | 0.1992 |
| 0.1064 | 0.2232 | 0.2201 | 0.2184 | 0.2167 | 0.1963 | 0.2022 | 0.1729 | 0.1658 |
| 0.0736 | 0.1685 | 0.1707 | 0.179  | 0.183  | 0.175  | 0.1762 | 0.1544 | 0.1568 |
| 0.0601 | 0.1286 | 0.1285 | 0.1312 | 0.1424 | 0.1371 | 0.1459 | 0.1332 | 0.1321 |
| 0.0694 | 0.118  | 0.1251 | 0.1297 | 0.1378 | 0.1374 | 0.1507 | 0.1435 | 0.1402 |
| 0.0932 | 0.1387 | 0.1422 | 0.1458 | 0.1513 | 0.1473 | 0.1561 | 0.1571 | 0.1544 |
| 0.142  | 0.2114 | 0.2053 | 0.1964 | 0.196  | 0.1776 | 0.183  | 0.1584 | 0.1547 |
| 0.2094 | 0.3664 | 0.3218 | 0.3039 | 0.295  | 0.2503 | 0.2593 | 0.2162 | 0.2225 |
| 0.1531 | 0.311  | 0.3067 | 0.3038 | 0.3199 | 0.29   | 0.2796 | 0.2407 | 0.2407 |
| 0.1432 | 0.216  | 0.2107 | 0.2069 | 0.2052 | 0.1968 | 0.2004 | 0.1835 | 0.1772 |
| 0.148  | 0.1406 | 0.1353 | 0.1379 | 0.1409 | 0.1429 | 0.1489 | 0.1474 | 0.1447 |
| 0.1016 | 0.0996 | 0.1004 | 0.108  | 0.1173 | 0.1278 | 0.1321 | 0.1418 | 0.1439 |
| 0.1307 | 0.2003 | 0.19   | 0.1899 | 0.1887 | 0.1802 | 0.1772 | 0.1622 | 0.1556 |
| 0.1778 | 0.3206 | 0.2935 | 0.2825 | 0.2882 | 0.2589 | 0.2583 | 0.2159 | 0.2183 |

|        |        |        |        |        |        |        |        |        |
|--------|--------|--------|--------|--------|--------|--------|--------|--------|
| 0.1236 | 0.303  | 0.3047 | 0.2998 | 0.3066 | 0.2681 | 0.2653 | 0.2439 | 0.2468 |
| 0.1393 | 0.307  | 0.2888 | 0.2874 | 0.2867 | 0.2444 | 0.2617 | 0.2072 | 0.1916 |
| 0.1477 | 0.3234 | 0.2992 | 0.2752 | 0.2679 | 0.2305 | 0.2384 | 0.2098 | 0.2008 |
| 0.1584 | 0.3377 | 0.2931 | 0.2799 | 0.2716 | 0.2433 | 0.248  | 0.21   | 0.2104 |
| 0.1304 | 0.2929 | 0.2724 | 0.2683 | 0.2672 | 0.2316 | 0.236  | 0.214  | 0.2154 |
| 0.101  | 0.1937 | 0.1968 | 0.2007 | 0.2015 | 0.1899 | 0.1964 | 0.1807 | 0.1815 |
| 0.1109 | 0.1283 | 0.1421 | 0.1514 | 0.1623 | 0.1695 | 0.1776 | 0.1831 | 0.1873 |
| 0.1042 | 0.1542 | 0.1555 | 0.1578 | 0.1633 | 0.1595 | 0.1701 | 0.1584 | 0.1602 |
| 0.0789 | 0.2276 | 0.2237 | 0.2169 | 0.2202 | 0.1956 | 0.2045 | 0.1719 | 0.1617 |
| 0.1237 | 0.3092 | 0.2904 | 0.2825 | 0.2852 | 0.2414 | 0.2274 | 0.1718 | 0.1752 |
| 0.1692 | 0.3035 | 0.2962 | 0.2957 | 0.2808 | 0.2464 | 0.2433 | 0.202  | 0.2073 |
| 0.0714 | 0.233  | 0.2214 | 0.2141 | 0.2215 | 0.1886 | 0.1823 | 0.143  | 0.1245 |
| 0.1995 | 0.2934 | 0.2669 | 0.2636 | 0.2756 | 0.2522 | 0.2394 | 0.2132 | 0.2027 |
| 0.0961 | 0.2425 | 0.2245 | 0.2244 | 0.2182 | 0.1893 | 0.1853 | 0.1521 | 0.145  |
| 0.1161 | 0.2827 | 0.2745 | 0.2653 | 0.26   | 0.2366 | 0.2484 | 0.2195 | 0.2051 |
| 0.2462 | 0.4077 | 0.3863 | 0.3709 | 0.3652 | 0.3198 | 0.3367 | 0.2841 | 0.2936 |
| 0.2232 | 0.3264 | 0.2958 | 0.2853 | 0.2902 | 0.2624 | 0.2455 | 0.2038 | 0.199  |
| 0.0442 | 0.0633 | 0.0592 | 0.057  | 0.0568 | 0.052  | 0.0498 | 0.0434 | 0.0407 |
| 0.2236 | 0.1315 | 0.1084 | 0.1038 | 0.1107 | 0.1114 | 0.1038 | 0.1143 | 0.1019 |
| 0.5872 | 0.3701 | 0.2988 | 0.2806 | 0.2941 | 0.3095 | 0.2786 | 0.2774 | 0.2614 |
| 0.1063 | 0.0643 | 0.0536 | 0.0515 | 0.0488 | 0.0496 | 0.0496 | 0.0535 | 0.053  |
| 0.0558 | 0.0349 | 0.0271 | 0.026  | 0.0249 | 0.0255 | 0.024  | 0.0246 | 0.024  |
| 0      | 0      | 0      | 0      | 0      | 0      | 0      | 0      | 0      |
| 0      | 0      | 0      | 0      | 0      | 0      | 0      | 0      | 0      |
| 0      | 0      | 0      | 0      | 0      | 0      | 0      | 0      | 0      |
| 0      | 0      | 0      | 0      | 0      | 0      | 0      | 0      | 0      |
| 0      | 0      | 0      | 0      | 0      | 0      | 0      | 0      | 0      |
| 0      | 0      | 0      | 0      | 0      | 0      | 0      | 0      | 0      |
| 0      | 0      | 0      | 0      | 0      | 0      | 0      | 0      | 0      |
| 0      | 0      | 0      | 0      | 0      | 0      | 0      | 0      | 0      |
| 0      | 0      | 0      | 0      | 0      | 0      | 0      | 0      | 0      |
| 0.046  | 0.029  | 0.0234 | 0.0236 | 0.0234 | 0.0228 | 0.0226 | 0.0236 | 0.024  |
| 0.173  | 0.1188 | 0.1012 | 0.0975 | 0.0986 | 0.0991 | 0.0888 | 0.0852 | 0.0876 |
| 0.8627 | 0.5762 | 0.4585 | 0.4622 | 0.4659 | 0.4714 | 0.4645 | 0.4607 | 0.4562 |
| 0.8992 | 0.6089 | 0.5123 | 0.4989 | 0.495  | 0.477  | 0.4463 | 0.4574 | 0.4266 |
| 0.2925 | 0.2897 | 0.2567 | 0.2515 | 0.2495 | 0.2346 | 0.2289 | 0.2112 | 0.2063 |
| 0.1617 | 0.2743 | 0.2507 | 0.251  | 0.2528 | 0.2239 | 0.2234 | 0.2018 | 0.2025 |
| 0.0844 | 0.2547 | 0.2493 | 0.2641 | 0.2672 | 0.2369 | 0.2276 | 0.1919 | 0.188  |
| 0.1618 | 0.2968 | 0.2758 | 0.2729 | 0.2748 | 0.2621 | 0.2661 | 0.2306 | 0.217  |
| 0.1729 | 0.2454 | 0.239  | 0.2467 | 0.249  | 0.2362 | 0.2413 | 0.2249 | 0.2202 |
| 0.1077 | 0.1523 | 0.1552 | 0.1575 | 0.1648 | 0.1651 | 0.1763 | 0.1737 | 0.1737 |
| 0.0595 | 0.1578 | 0.1628 | 0.1672 | 0.166  | 0.1548 | 0.1527 | 0.136  | 0.1319 |
| 0.118  | 0.2872 | 0.2527 | 0.2524 | 0.2535 | 0.2205 | 0.22   | 0.1873 | 0.1964 |
| 0.1245 | 0.2727 | 0.25   | 0.245  | 0.2547 | 0.2228 | 0.2321 | 0.1851 | 0.1828 |

|        |        |        |        |        |        |        |        |        |
|--------|--------|--------|--------|--------|--------|--------|--------|--------|
| 0.0654 | 0.1747 | 0.1608 | 0.1618 | 0.1609 | 0.1492 | 0.1515 | 0.1301 | 0.1193 |
| 0.0819 | 0.1739 | 0.1797 | 0.1822 | 0.1834 | 0.1766 | 0.1846 | 0.1716 | 0.1663 |
| 0.1225 | 0.1461 | 0.1508 | 0.1597 | 0.1657 | 0.17   | 0.1809 | 0.1814 | 0.1793 |
| 0.0934 | 0.0935 | 0.1131 | 0.1259 | 0.1266 | 0.1482 | 0.1629 | 0.1731 | 0.1752 |
| 0.1226 | 0.1894 | 0.1842 | 0.1861 | 0.1967 | 0.1828 | 0.1914 | 0.1747 | 0.1733 |
| 0.1273 | 0.2821 | 0.2641 | 0.2518 | 0.2415 | 0.2092 | 0.2116 | 0.159  | 0.1593 |
| 0.1019 | 0.2977 | 0.2992 | 0.2965 | 0.2782 | 0.2513 | 0.2652 | 0.2152 | 0.2033 |
| 0.1646 | 0.3412 | 0.3265 | 0.3206 | 0.325  | 0.2844 | 0.2624 | 0.2268 | 0.2227 |
| 0.1103 | 0.2825 | 0.28   | 0.281  | 0.2898 | 0.2562 | 0.24   | 0.1861 | 0.1835 |
| 0.1175 | 0.3128 | 0.2897 | 0.2908 | 0.2846 | 0.248  | 0.2466 | 0.2112 | 0.1963 |
| 0.1373 | 0.2863 | 0.268  | 0.2447 | 0.2437 | 0.2092 | 0.2008 | 0.1576 | 0.1533 |
| 0.0835 | 0.1809 | 0.1791 | 0.1764 | 0.1761 | 0.1651 | 0.1688 | 0.1567 | 0.162  |
| 0.1146 | 0.1806 | 0.1812 | 0.1862 | 0.1918 | 0.1881 | 0.1932 | 0.1801 | 0.1778 |
| 0.1267 | 0.2258 | 0.2187 | 0.2202 | 0.2232 | 0.2081 | 0.2126 | 0.1888 | 0.1923 |
| 0.1287 | 0.2992 | 0.3001 | 0.2912 | 0.2769 | 0.2433 | 0.2427 | 0.2042 | 0.2024 |
| 0.1634 | 0.3406 | 0.3257 | 0.2876 | 0.2936 | 0.2503 | 0.2622 | 0.2287 | 0.2216 |
| 0.1366 | 0.3002 | 0.2732 | 0.2697 | 0.2774 | 0.2467 | 0.2453 | 0.2055 | 0.2039 |
| 0.1467 | 0.3454 | 0.3409 | 0.3383 | 0.3117 | 0.2764 | 0.2765 | 0.2349 | 0.2437 |
| 0.0969 | 0.2542 | 0.2422 | 0.2428 | 0.2373 | 0.2041 | 0.197  | 0.1571 | 0.138  |
| 0.192  | 0.2909 | 0.2648 | 0.2602 | 0.2541 | 0.2312 | 0.2346 | 0.212  | 0.2201 |
| 0.3157 | 0.3357 | 0.2946 | 0.2762 | 0.2701 | 0.2504 | 0.2367 | 0.2156 | 0.205  |
| 0.2477 | 0.3884 | 0.3812 | 0.3679 | 0.3492 | 0.3078 | 0.3184 | 0.3011 | 0.2848 |
| 0.1199 | 0.2968 | 0.2723 | 0.2593 | 0.2655 | 0.2282 | 0.2314 | 0.1833 | 0.174  |
| 0.1396 | 0.1099 | 0.099  | 0.1019 | 0.1029 | 0.0939 | 0.0888 | 0.0808 | 0.0796 |
| 0.607  | 0.3645 | 0.3176 | 0.3031 | 0.2879 | 0.289  | 0.2902 | 0.3002 | 0.2949 |
| 1.0665 | 0.6279 | 0.512  | 0.5228 | 0.5259 | 0.5101 | 0.5089 | 0.5384 | 0.5316 |
| 0.0718 | 0.0409 | 0.0337 | 0.0312 | 0.0313 | 0.0325 | 0.0296 | 0.0319 | 0.0341 |
| 0.0324 | 0.0197 | 0.0155 | 0.0143 | 0.0149 | 0.0149 | 0.0136 | 0.014  | 0.0144 |
| 0      | 0      | 0      | 0      | 0      | 0      | 0      | 0      | 0      |
| 0      | 0      | 0      | 0      | 0      | 0      | 0      | 0      | 0      |
| 0      | 0      | 0      | 0      | 0      | 0      | 0      | 0      | 0      |
| 0      | 0      | 0      | 0      | 0      | 0      | 0      | 0      | 0      |
| 0      | 0      | 0      | 0      | 0      | 0      | 0      | 0      | 0      |
| 0      | 0      | 0      | 0      | 0      | 0      | 0      | 0      | 0      |
| 0      | 0      | 0      | 0      | 0      | 0      | 0      | 0      | 0      |
| 0      | 0      | 0      | 0      | 0      | 0      | 0      | 0      | 0      |
| 0.0464 | 0.0377 | 0.0312 | 0.0301 | 0.0287 | 0.0281 | 0.0278 | 0.028  | 0.0285 |
| 0.0987 | 0.0583 | 0.0463 | 0.0446 | 0.0472 | 0.0517 | 0.0467 | 0.0465 | 0.045  |
| 0.0432 | 0.0267 | 0.0229 | 0.0227 | 0.0212 | 0.0207 | 0.0193 | 0.0196 | 0.0196 |
| 0.6202 | 0.3848 | 0.3224 | 0.3209 | 0.3172 | 0.3096 | 0.3054 | 0.2971 | 0.276  |
| 0.8682 | 0.5482 | 0.4283 | 0.4263 | 0.428  | 0.4559 | 0.4295 | 0.4206 | 0.4179 |
| 0.2868 | 0.27   | 0.2388 | 0.229  | 0.2206 | 0.2098 | 0.2069 | 0.1832 | 0.1778 |
| 0.1156 | 0.2734 | 0.2588 | 0.2636 | 0.2665 | 0.2321 | 0.236  | 0.2009 | 0.1866 |
| 0.2095 | 0.3405 | 0.3208 | 0.3234 | 0.3183 | 0.2955 | 0.2835 | 0.2402 | 0.2326 |

|        |        |        |        |        |        |        |        |        |
|--------|--------|--------|--------|--------|--------|--------|--------|--------|
| 0.0698 | 0.2195 | 0.2172 | 0.215  | 0.2112 | 0.1953 | 0.1911 | 0.1705 | 0.1636 |
| 0.1271 | 0.2712 | 0.2556 | 0.2501 | 0.2536 | 0.2155 | 0.2141 | 0.1813 | 0.1776 |
| 0.1402 | 0.3119 | 0.3034 | 0.283  | 0.2861 | 0.2663 | 0.2619 | 0.2218 | 0.2156 |
| 0.1346 | 0.3041 | 0.2824 | 0.2867 | 0.2745 | 0.2671 | 0.2637 | 0.2209 | 0.2211 |
| 0.1904 | 0.2775 | 0.2699 | 0.2519 | 0.2395 | 0.2105 | 0.2119 | 0.1887 | 0.1946 |
| 0.1716 | 0.1676 | 0.1552 | 0.1567 | 0.1596 | 0.1606 | 0.1645 | 0.1605 | 0.1604 |
| 0.1229 | 0.1003 | 0.1053 | 0.114  | 0.1198 | 0.1303 | 0.1411 | 0.146  | 0.1472 |
| 0.1431 | 0.1747 | 0.1794 | 0.1855 | 0.1935 | 0.1962 | 0.2055 | 0.2028 | 0.201  |
| 0.0862 | 0.1325 | 0.1451 | 0.1572 | 0.1698 | 0.1736 | 0.1874 | 0.1839 | 0.1815 |
| 0.0899 | 0.1293 | 0.1388 | 0.144  | 0.1474 | 0.1491 | 0.1634 | 0.1709 | 0.1686 |
| 0.0956 | 0.208  | 0.2065 | 0.2115 | 0.2112 | 0.1927 | 0.1963 | 0.1742 | 0.1642 |
| 0.0918 | 0.2708 | 0.2508 | 0.2419 | 0.2504 | 0.22   | 0.2294 | 0.2084 | 0.2134 |
| 0.0822 | 0.2657 | 0.2574 | 0.2459 | 0.2377 | 0.2121 | 0.2063 | 0.1574 | 0.1551 |
| 0.1763 | 0.3224 | 0.3002 | 0.2802 | 0.2842 | 0.2542 | 0.2516 | 0.2154 | 0.2256 |
| 0.2508 | 0.3648 | 0.3434 | 0.3382 | 0.3311 | 0.304  | 0.2994 | 0.2628 | 0.2503 |
| 0.1086 | 0.3104 | 0.2971 | 0.2894 | 0.2928 | 0.2448 | 0.2362 | 0.218  | 0.2087 |
| 0.1147 | 0.2836 | 0.2522 | 0.2519 | 0.2492 | 0.2109 | 0.2057 | 0.1768 | 0.1657 |
| 0.1049 | 0.2066 | 0.2017 | 0.2037 | 0.2046 | 0.1917 | 0.193  | 0.1786 | 0.1738 |
| 0.1134 | 0.2197 | 0.2052 | 0.2074 | 0.2119 | 0.1889 | 0.1898 | 0.1665 | 0.161  |
| 0.1663 | 0.2951 | 0.2744 | 0.2758 | 0.2772 | 0.2692 | 0.2712 | 0.2383 | 0.2462 |
| 0.1075 | 0.2734 | 0.2536 | 0.2548 | 0.2579 | 0.2363 | 0.2361 | 0.1845 | 0.1834 |
| 0.1054 | 0.2771 | 0.2686 | 0.2638 | 0.2522 | 0.2243 | 0.23   | 0.1847 | 0.1818 |
| 0.0967 | 0.2628 | 0.2405 | 0.2293 | 0.2324 | 0.1902 | 0.1928 | 0.1489 | 0.1449 |
| 0.1321 | 0.3017 | 0.281  | 0.2715 | 0.2699 | 0.2534 | 0.2468 | 0.199  | 0.1943 |
| 0.1032 | 0.2749 | 0.2597 | 0.2587 | 0.2492 | 0.2193 | 0.2172 | 0.1895 | 0.1806 |
| 0.2434 | 0.3192 | 0.3012 | 0.2998 | 0.2991 | 0.2849 | 0.2729 | 0.2419 | 0.2341 |
| 0.3275 | 0.3715 | 0.3283 | 0.3205 | 0.3163 | 0.2996 | 0.2849 | 0.2572 | 0.2586 |
| 0.129  | 0.3293 | 0.3016 | 0.2913 | 0.2916 | 0.2432 | 0.2393 | 0.203  | 0.2061 |
| 0.0796 | 0.2236 | 0.2183 | 0.2136 | 0.2116 | 0.1837 | 0.186  | 0.1528 | 0.146  |
| 0.2035 | 0.1467 | 0.1207 | 0.119  | 0.1177 | 0.1188 | 0.1189 | 0.1122 | 0.1113 |
| 0.3387 | 0.2003 | 0.1488 | 0.1443 | 0.1516 | 0.1654 | 0.1703 | 0.176  | 0.1701 |
| 0.3185 | 0.1917 | 0.1465 | 0.1357 | 0.1312 | 0.1186 | 0.1082 | 0.1149 | 0.1201 |
| 0.0521 | 0.0328 | 0.0251 | 0.0246 | 0.0246 | 0.0256 | 0.0262 | 0.0264 | 0.0253 |
| 0.0175 | 0.0111 | 0.0089 | 0.0086 | 0.0089 | 0.0096 | 0.0092 | 0.009  | 0.0091 |
| 0      | 0      | 0      | 0      | 0      | 0      | 0      | 0      | 0      |
| 0      | 0      | 0      | 0      | 0      | 0      | 0      | 0      | 0      |
| 0      | 0      | 0      | 0      | 0      | 0      | 0      | 0      | 0      |
| 0      | 0      | 0      | 0      | 0      | 0      | 0      | 0      | 0      |
| 0      | 0      | 0      | 0      | 0      | 0      | 0      | 0      | 0      |
| 0      | 0      | 0      | 0      | 0      | 0      | 0      | 0      | 0      |
| 0      | 0      | 0      | 0      | 0      | 0      | 0      | 0      | 0      |
| 0      | 0      | 0      | 0      | 0      | 0      | 0      | 0      | 0      |
| 0.0037 | 0.007  | 0.0069 | 0.0072 | 0.0074 | 0.0071 | 0.0072 | 0.0067 | 0.0065 |
| 0.1103 | 0.065  | 0.0512 | 0.0476 | 0.0517 | 0.056  | 0.0577 | 0.0565 | 0.0602 |





|        |        |        |        |        |        |        |        |        |
|--------|--------|--------|--------|--------|--------|--------|--------|--------|
| 0      | 0      | 0      | 0      | 0      | 0      | 0      | 0      | 0      |
| 0      | 0      | 0      | 0      | 0      | 0      | 0      | 0      | 0      |
| 0      | 0      | 0      | 0      | 0      | 0      | 0      | 0      | 0      |
| 0      | 0      | 0      | 0      | 0      | 0      | 0      | 0      | 0      |
| 0.0003 | 0.0004 | 0.0005 | 0.0006 | 0.0006 | 0.0007 | 0.0008 | 0.0008 | 0.0008 |
| 0.081  | 0.0512 | 0.0454 | 0.0443 | 0.0466 | 0.0483 | 0.0465 | 0.0471 | 0.0471 |
| 0.0089 | 0.0055 | 0.0045 | 0.0042 | 0.0042 | 0.0043 | 0.0039 | 0.0041 | 0.004  |
| 0.0038 | 0.0045 | 0.0057 | 0.0076 | 0.0077 | 0.0093 | 0.0105 | 0.0127 | 0.0133 |
| 0.1052 | 0.1275 | 0.1252 | 0.1281 | 0.1305 | 0.1293 | 0.1338 | 0.1301 | 0.1276 |
| 0.1138 | 0.1918 | 0.1885 | 0.1852 | 0.1892 | 0.1756 | 0.186  | 0.172  | 0.1706 |
| 0.1013 | 0.1848 | 0.181  | 0.1825 | 0.1891 | 0.1787 | 0.1843 | 0.1746 | 0.1733 |
| 0.0627 | 0.1018 | 0.1144 | 0.1233 | 0.1286 | 0.1371 | 0.1638 | 0.1581 | 0.1557 |
| 0.1829 | 0.2444 | 0.2374 | 0.2382 | 0.2359 | 0.2215 | 0.2226 | 0.199  | 0.1971 |
| 0.0743 | 0.1839 | 0.1788 | 0.1889 | 0.1925 | 0.1781 | 0.1792 | 0.1616 | 0.1623 |
| 0.0776 | 0.1607 | 0.1687 | 0.1732 | 0.1742 | 0.1651 | 0.1711 | 0.1613 | 0.1633 |
| 0.1547 | 0.1375 | 0.1363 | 0.1424 | 0.1452 | 0.1508 | 0.1595 | 0.1613 | 0.1596 |
| 0.218  | 0.1559 | 0.1507 | 0.1541 | 0.1626 | 0.1715 | 0.1834 | 0.19   | 0.1845 |
| 0.1177 | 0.1429 | 0.1501 | 0.1555 | 0.1584 | 0.1696 | 0.1806 | 0.1786 | 0.1766 |
| 0.0586 | 0.0999 | 0.1204 | 0.1319 | 0.1472 | 0.1454 | 0.1529 | 0.1562 | 0.1561 |
| 0.0848 | 0.1037 | 0.1123 | 0.1355 | 0.1487 | 0.1578 | 0.1877 | 0.1946 | 0.1918 |
| 0.0836 | 0.1044 | 0.1248 | 0.1423 | 0.1263 | 0.146  | 0.1728 | 0.1749 | 0.1626 |
| 0.0976 | 0.1409 | 0.1509 | 0.1491 | 0.1559 | 0.1639 | 0.1812 | 0.1868 | 0.1806 |
| 0.11   | 0.2235 | 0.2192 | 0.2217 | 0.2267 | 0.1991 | 0.2085 | 0.1831 | 0.1795 |
| 0.1063 | 0.2799 | 0.2656 | 0.2585 | 0.2511 | 0.2175 | 0.2123 | 0.1756 | 0.1772 |
| 0.1364 | 0.3109 | 0.2992 | 0.2953 | 0.2932 | 0.2671 | 0.2841 | 0.2518 | 0.2392 |
| 0.3238 | 0.4089 | 0.3667 | 0.3665 | 0.3779 | 0.3464 | 0.3275 | 0.2951 | 0.2828 |
| 0.3469 | 0.3878 | 0.3563 | 0.354  | 0.3569 | 0.3213 | 0.3169 | 0.2946 | 0.2939 |
| 0.1645 | 0.3016 | 0.269  | 0.2569 | 0.2546 | 0.2302 | 0.2302 | 0.1952 | 0.2004 |
| 0.1109 | 0.2587 | 0.2448 | 0.2315 | 0.2186 | 0.1888 | 0.1895 | 0.1548 | 0.1542 |
| 0.1896 | 0.3492 | 0.3137 | 0.3073 | 0.2962 | 0.2692 | 0.2559 | 0.2167 | 0.22   |
| 0.1321 | 0.3009 | 0.2974 | 0.2881 | 0.2837 | 0.2461 | 0.2544 | 0.2085 | 0.196  |
| 0.1022 | 0.2821 | 0.2536 | 0.248  | 0.2422 | 0.223  | 0.214  | 0.1526 | 0.1457 |
| 0.1279 | 0.3276 | 0.3106 | 0.2981 | 0.2973 | 0.2622 | 0.275  | 0.2182 | 0.2175 |
| 0.1135 | 0.3083 | 0.2771 | 0.2757 | 0.2777 | 0.2378 | 0.2266 | 0.1952 | 0.2053 |
| 0.0926 | 0.2574 | 0.245  | 0.2523 | 0.2505 | 0.2169 | 0.2121 | 0.1813 | 0.1787 |
| 0.1911 | 0.3226 | 0.2883 | 0.2723 | 0.2604 | 0.2259 | 0.2261 | 0.1771 | 0.162  |
| 0.1053 | 0.2619 | 0.251  | 0.2507 | 0.2541 | 0.2168 | 0.2284 | 0.1848 | 0.1841 |
| 0.2116 | 0.3425 | 0.3088 | 0.2919 | 0.2771 | 0.2532 | 0.2502 | 0.2007 | 0.2082 |
| 0.2018 | 0.2965 | 0.2726 | 0.2718 | 0.2652 | 0.239  | 0.2419 | 0.208  | 0.2023 |
| 0.0691 | 0.0671 | 0.0618 | 0.0606 | 0.0592 | 0.054  | 0.0522 | 0.0476 | 0.0472 |
| 0.1045 | 0.0601 | 0.0467 | 0.0436 | 0.0424 | 0.0472 | 0.0422 | 0.0451 | 0.0432 |
| 0.2343 | 0.1567 | 0.1272 | 0.1303 | 0.1272 | 0.1281 | 0.1165 | 0.1197 | 0.1154 |
| 0.2296 | 0.1419 | 0.1101 | 0.1078 | 0.1091 | 0.1066 | 0.0968 | 0.1006 | 0.1047 |
| 0.1106 | 0.0813 | 0.0705 | 0.0657 | 0.0659 | 0.0589 | 0.0601 | 0.0564 | 0.0524 |

|        |        |        |        |        |        |        |        |        |   |
|--------|--------|--------|--------|--------|--------|--------|--------|--------|---|
| 0      | 0      | 0      | 0      | 0      | 0      | 0      | 0      | 0      | 0 |
| 0      | 0      | 0      | 0      | 0      | 0      | 0      | 0      | 0      | 0 |
| 0      | 0      | 0      | 0      | 0      | 0      | 0      | 0      | 0      | 0 |
| 0      | 0      | 0      | 0      | 0      | 0      | 0      | 0      | 0      | 0 |
| 0      | 0      | 0      | 0      | 0      | 0      | 0      | 0      | 0      | 0 |
| 0      | 0      | 0      | 0      | 0      | 0      | 0      | 0      | 0      | 0 |
| 0      | 0      | 0      | 0      | 0      | 0      | 0      | 0      | 0      | 0 |
| 0      | 0      | 0      | 0      | 0      | 0      | 0      | 0      | 0      | 0 |
| 0      | 0      | 0      | 0      | 0      | 0      | 0      | 0      | 0      | 0 |
| 0      | 0      | 0      | 0      | 0      | 0      | 0      | 0      | 0      | 0 |
| 0.025  | 0.0139 | 0.0105 | 0.0101 | 0.01   | 0.0101 | 0.0097 | 0.0104 | 0.0101 |   |
| 0.013  | 0.0129 | 0.0124 | 0.0128 | 0.0133 | 0.0136 | 0.0143 | 0.0143 | 0.0142 |   |
| 0.08   | 0.0497 | 0.0399 | 0.0374 | 0.0376 | 0.0394 | 0.0388 | 0.0383 | 0.0357 |   |
| 0.1276 | 0.0904 | 0.0822 | 0.0813 | 0.0822 | 0.0837 | 0.0831 | 0.083  | 0.0801 |   |
| 0.1034 | 0.1701 | 0.1683 | 0.1736 | 0.1778 | 0.1716 | 0.1733 | 0.1627 | 0.1635 |   |
| 0.1144 | 0.2318 | 0.2344 | 0.2371 | 0.2335 | 0.2176 | 0.2302 | 0.2052 | 0.1909 |   |
| 0.1218 | 0.1952 | 0.1909 | 0.1976 | 0.2044 | 0.1948 | 0.2029 | 0.1897 | 0.1883 |   |
| 0.1222 | 0.1428 | 0.1473 | 0.1563 | 0.1692 | 0.1808 | 0.2036 | 0.2059 | 0.1985 |   |
| 0.1172 | 0.1838 | 0.1899 | 0.1963 | 0.2001 | 0.1944 | 0.2024 | 0.1925 | 0.1911 |   |
| 0.0966 | 0.2308 | 0.2279 | 0.2233 | 0.229  | 0.2099 | 0.2091 | 0.1795 | 0.1743 |   |
| 0.0692 | 0.1673 | 0.1581 | 0.1689 | 0.1704 | 0.1589 | 0.1641 | 0.1492 | 0.1508 |   |
| 0.0513 | 0.0987 | 0.1048 | 0.1088 | 0.1186 | 0.1213 | 0.1323 | 0.1268 | 0.1252 |   |
| 0.0784 | 0.138  | 0.1401 | 0.1471 | 0.1497 | 0.1466 | 0.1579 | 0.156  | 0.1516 |   |
| 0.0731 | 0.1289 | 0.141  | 0.1574 | 0.1675 | 0.1684 | 0.1775 | 0.1719 | 0.1662 |   |
| 0.0718 | 0.0826 | 0.1047 | 0.125  | 0.1396 | 0.1477 | 0.1579 | 0.1614 | 0.1748 |   |
| 0.1057 | 0.1019 | 0.126  | 0.1491 | 0.1565 | 0.1755 | 0.2039 | 0.2085 | 0.2014 |   |
| 0.0882 | 0.1211 | 0.1473 | 0.1564 | 0.1624 | 0.1683 | 0.1864 | 0.1897 | 0.193  |   |
| 0.1021 | 0.1003 | 0.1235 | 0.1302 | 0.1374 | 0.1537 | 0.1628 | 0.1828 | 0.1778 |   |
| 0.1126 | 0.164  | 0.1707 | 0.1786 | 0.1849 | 0.1863 | 0.1981 | 0.1909 | 0.1861 |   |
| 0.0814 | 0.261  | 0.2513 | 0.2527 | 0.2419 | 0.2108 | 0.2176 | 0.1828 | 0.1788 |   |
| 0.0974 | 0.3043 | 0.2707 | 0.2855 | 0.2828 | 0.2458 | 0.2582 | 0.2145 | 0.193  |   |
| 0.2059 | 0.3444 | 0.314  | 0.3072 | 0.3039 | 0.2754 | 0.2555 | 0.2187 | 0.2025 |   |
| 0.2559 | 0.388  | 0.3498 | 0.3292 | 0.3353 | 0.2985 | 0.2946 | 0.2784 | 0.2778 |   |
| 0.1043 | 0.2415 | 0.2336 | 0.2186 | 0.2155 | 0.1799 | 0.1858 | 0.1534 | 0.152  |   |
| 0.0742 | 0.203  | 0.2063 | 0.2079 | 0.2013 | 0.1799 | 0.1883 | 0.1642 | 0.1521 |   |
| 0.1728 | 0.3575 | 0.3164 | 0.2966 | 0.3052 | 0.2643 | 0.2497 | 0.2207 | 0.208  |   |
| 0.1439 | 0.3125 | 0.2975 | 0.3018 | 0.3101 | 0.2749 | 0.2662 | 0.2312 | 0.2296 |   |
| 0.1128 | 0.2808 | 0.2676 | 0.2529 | 0.253  | 0.2381 | 0.2417 | 0.2147 | 0.217  |   |
| 0.1527 | 0.3056 | 0.2994 | 0.2891 | 0.2886 | 0.2587 | 0.2402 | 0.2045 | 0.1921 |   |
| 0.179  | 0.2756 | 0.2443 | 0.252  | 0.2517 | 0.2357 | 0.2375 | 0.2005 | 0.1883 |   |
| 0.1523 | 0.2599 | 0.2473 | 0.2423 | 0.2441 | 0.2156 | 0.2029 | 0.1737 | 0.1645 |   |
| 0.1584 | 0.3343 | 0.3296 | 0.3316 | 0.3142 | 0.2898 | 0.2868 | 0.2443 | 0.2548 |   |
| 0.185  | 0.3523 | 0.3253 | 0.3245 | 0.3445 | 0.2845 | 0.281  | 0.2406 | 0.2495 |   |
| 0.1759 | 0.2645 | 0.2406 | 0.2486 | 0.2393 | 0.2146 | 0.2137 | 0.1712 | 0.1731 |   |

|        |        |        |        |        |        |        |        |        |
|--------|--------|--------|--------|--------|--------|--------|--------|--------|
| 0.0937 | 0.0894 | 0.0812 | 0.079  | 0.0789 | 0.072  | 0.0694 | 0.0632 | 0.0625 |
| 0.0278 | 0.0169 | 0.0138 | 0.0136 | 0.014  | 0.0147 | 0.0143 | 0.0146 | 0.0139 |
| 0.0014 | 0.0041 | 0.0041 | 0.0044 | 0.0043 | 0.0039 | 0.0041 | 0.0037 | 0.0037 |
| 0.0092 | 0.0055 | 0.0044 | 0.0042 | 0.0045 | 0.0044 | 0.0044 | 0.0043 | 0.0044 |
| 0      | 0      | 0      | 0      | 0      | 0      | 0      | 0      | 0      |
| 0.001  | 0.0026 | 0.0026 | 0.0026 | 0.0026 | 0.0022 | 0.0022 | 0.0019 | 0.0019 |
| 0      | 0      | 0      | 0      | 0      | 0      | 0      | 0      | 0      |
| 0      | 0      | 0      | 0      | 0      | 0      | 0      | 0      | 0      |
| 0      | 0      | 0      | 0      | 0      | 0      | 0      | 0      | 0      |
| 0      | 0      | 0      | 0      | 0      | 0      | 0      | 0      | 0      |
| 0      | 0      | 0      | 0      | 0      | 0      | 0      | 0      | 0      |
| 0      | 0      | 0      | 0      | 0      | 0      | 0      | 0      | 0      |
| 0      | 0      | 0      | 0      | 0      | 0      | 0      | 0      | 0      |
| 0      | 0      | 0      | 0      | 0      | 0      | 0      | 0      | 0      |
| 0      | 0      | 0      | 0      | 0      | 0      | 0      | 0      | 0      |
| 0      | 0      | 0      | 0      | 0      | 0      | 0      | 0      | 0      |
| 0.0684 | 0.0459 | 0.0362 | 0.0344 | 0.0341 | 0.0321 | 0.0294 | 0.0283 | 0.0295 |
| 0.0052 | 0.0136 | 0.0133 | 0.0132 | 0.0132 | 0.0116 | 0.0121 | 0.011  | 0.0107 |
| 0.0421 | 0.0246 | 0.0198 | 0.0186 | 0.0199 | 0.0196 | 0.0187 | 0.0178 | 0.0186 |
| 0.0687 | 0.0667 | 0.0619 | 0.0621 | 0.0626 | 0.0607 | 0.0597 | 0.0573 | 0.0555 |
| 0.051  | 0.1271 | 0.1246 | 0.1218 | 0.123  | 0.1104 | 0.1191 | 0.1095 | 0.1099 |
| 0.0705 | 0.1708 | 0.1711 | 0.1749 | 0.1721 | 0.1574 | 0.1622 | 0.1456 | 0.1371 |
| 0.0669 | 0.1359 | 0.1336 | 0.1343 | 0.1394 | 0.1328 | 0.139  | 0.1254 | 0.1234 |
| 0.1395 | 0.15   | 0.1513 | 0.1577 | 0.1623 | 0.1614 | 0.1724 | 0.1747 | 0.1731 |
| 0.0585 | 0.0865 | 0.1092 | 0.1272 | 0.1296 | 0.1404 | 0.1555 | 0.1587 | 0.1517 |
| 0.2765 | 0.3435 | 0.3171 | 0.3164 | 0.3228 | 0.2978 | 0.2944 | 0.2733 | 0.2718 |
| 0.2968 | 0.4069 | 0.3695 | 0.3443 | 0.3423 | 0.3025 | 0.2953 | 0.2514 | 0.2388 |
| 0.1512 | 0.3025 | 0.2852 | 0.2801 | 0.2947 | 0.2645 | 0.2725 | 0.234  | 0.2182 |
| 0.06   | 0.2178 | 0.2182 | 0.2111 | 0.2178 | 0.2104 | 0.2136 | 0.1821 | 0.178  |
| 0.179  | 0.2048 | 0.2013 | 0.2057 | 0.2113 | 0.2128 | 0.221  | 0.2154 | 0.2122 |
| 0.2117 | 0.157  | 0.1582 | 0.1728 | 0.1888 | 0.2074 | 0.2257 | 0.2365 | 0.2318 |
| 0.2113 | 0.1978 | 0.1969 | 0.207  | 0.2151 | 0.2285 | 0.2452 | 0.2518 | 0.2453 |
| 0.1039 | 0.1682 | 0.1741 | 0.1789 | 0.1814 | 0.1794 | 0.1908 | 0.1799 | 0.1775 |
| 0.0724 | 0.0935 | 0.1171 | 0.1456 | 0.1532 | 0.1645 | 0.1809 | 0.1949 | 0.192  |
| 0.0852 | 0.1111 | 0.1222 | 0.1363 | 0.146  | 0.1602 | 0.1685 | 0.1771 | 0.1701 |
| 0.1144 | 0.2662 | 0.2571 | 0.251  | 0.2512 | 0.2103 | 0.199  | 0.1722 | 0.1605 |
| 0.0997 | 0.2812 | 0.2737 | 0.2655 | 0.267  | 0.228  | 0.2434 | 0.1944 | 0.1937 |
| 0.1288 | 0.2917 | 0.2812 | 0.2778 | 0.2611 | 0.239  | 0.2278 | 0.1934 | 0.1894 |
| 0.1696 | 0.3414 | 0.3168 | 0.3142 | 0.3009 | 0.2641 | 0.2573 | 0.2157 | 0.2085 |
| 0.0899 | 0.2426 | 0.2378 | 0.2418 | 0.2359 | 0.2125 | 0.2109 | 0.1763 | 0.1737 |
| 0.1009 | 0.2493 | 0.2384 | 0.2274 | 0.2273 | 0.1995 | 0.1946 | 0.1598 | 0.1559 |
| 0.1935 | 0.3492 | 0.3246 | 0.3094 | 0.3011 | 0.273  | 0.2729 | 0.2374 | 0.2363 |
| 0.0859 | 0.25   | 0.2358 | 0.2418 | 0.2441 | 0.2113 | 0.2222 | 0.1808 | 0.175  |
| 0.0786 | 0.2289 | 0.2189 | 0.2055 | 0.1952 | 0.1777 | 0.1869 | 0.1585 | 0.1492 |

|        |        |        |        |        |        |        |        |        |
|--------|--------|--------|--------|--------|--------|--------|--------|--------|
| 0.3092 | 0.3145 | 0.2857 | 0.2877 | 0.2856 | 0.263  | 0.2522 | 0.2198 | 0.2117 |
| 0.448  | 0.3809 | 0.329  | 0.313  | 0.3108 | 0.2864 | 0.2722 | 0.2538 | 0.2603 |
| 0.2741 | 0.3003 | 0.2731 | 0.2718 | 0.2701 | 0.2546 | 0.2554 | 0.2382 | 0.2428 |
| 0.1475 | 0.2662 | 0.2399 | 0.2325 | 0.2229 | 0.1953 | 0.1904 | 0.1533 | 0.1496 |
| 0.1729 | 0.2742 | 0.2669 | 0.2549 | 0.2515 | 0.222  | 0.2281 | 0.191  | 0.1887 |
| 0.0683 | 0.1015 | 0.0917 | 0.0875 | 0.0855 | 0.0725 | 0.0716 | 0.0574 | 0.059  |
| 0.0003 | 0.0003 | 0.0004 | 0.0005 | 0.0006 | 0.0007 | 0.0008 | 0.0008 | 0.0008 |
| 0.0388 | 0.0301 | 0.026  | 0.026  | 0.0267 | 0.0254 | 0.0247 | 0.0227 | 0.0229 |
| 0.1375 | 0.0861 | 0.0689 | 0.0661 | 0.0684 | 0.0698 | 0.0635 | 0.0575 | 0.0546 |
| 0.1501 | 0.0918 | 0.074  | 0.0719 | 0.0736 | 0.0696 | 0.0705 | 0.0735 | 0.0756 |
| 0.0757 | 0.0577 | 0.052  | 0.0486 | 0.0472 | 0.0455 | 0.0461 | 0.042  | 0.0406 |
| 0      | 0      | 0      | 0      | 0      | 0      | 0      | 0      | 0      |
| 0      | 0      | 0      | 0      | 0      | 0      | 0      | 0      | 0      |
| 0      | 0      | 0      | 0      | 0      | 0      | 0      | 0      | 0      |
| 0      | 0      | 0      | 0      | 0      | 0      | 0      | 0      | 0      |
| 0      | 0      | 0      | 0      | 0      | 0      | 0      | 0      | 0      |
| 0      | 0      | 0      | 0      | 0      | 0      | 0      | 0      | 0      |
| 0      | 0      | 0      | 0      | 0      | 0      | 0      | 0      | 0      |
| 0      | 0      | 0      | 0      | 0      | 0      | 0      | 0      | 0      |
| 0      | 0      | 0      | 0      | 0      | 0      | 0      | 0      | 0      |
| 0      | 0      | 0      | 0      | 0      | 0      | 0      | 0      | 0      |
| 0.0017 | 0.0021 | 0.0024 | 0.0029 | 0.0032 | 0.0036 | 0.0041 | 0.0044 | 0.0045 |
| 0.0167 | 0.0099 | 0.0085 | 0.0083 | 0.008  | 0.0083 | 0.0083 | 0.0085 | 0.0083 |
| 0.0618 | 0.0369 | 0.0306 | 0.0286 | 0.0275 | 0.0274 | 0.026  | 0.0277 | 0.0277 |
| 0.0008 | 0.001  | 0.0013 | 0.0014 | 0.0015 | 0.0016 | 0.0018 | 0.002  | 0.0019 |
| 0.0173 | 0.0272 | 0.026  | 0.0257 | 0.0255 | 0.0239 | 0.0243 | 0.0211 | 0.0207 |
| 0.0699 | 0.0678 | 0.0583 | 0.0579 | 0.0584 | 0.057  | 0.0558 | 0.0525 | 0.0508 |
| 0.0087 | 0.0221 | 0.0226 | 0.0233 | 0.0244 | 0.0235 | 0.0235 | 0.022  | 0.022  |
| 0.0071 | 0.009  | 0.0108 | 0.0153 | 0.0172 | 0.0199 | 0.022  | 0.0228 | 0.0225 |
| 0.0686 | 0.0463 | 0.0419 | 0.0424 | 0.0419 | 0.0439 | 0.0457 | 0.0482 | 0.0474 |
| 0.6128 | 0.4595 | 0.3981 | 0.3865 | 0.3971 | 0.3822 | 0.3759 | 0.3631 | 0.3785 |
| 0.7415 | 0.6742 | 0.6033 | 0.5595 | 0.5399 | 0.5093 | 0.5141 | 0.5005 | 0.5004 |
| 0.4249 | 0.5293 | 0.4821 | 0.4669 | 0.4497 | 0.4099 | 0.38   | 0.3483 | 0.324  |
| 0.1088 | 0.2993 | 0.2963 | 0.2778 | 0.2759 | 0.2535 | 0.2618 | 0.2318 | 0.2157 |
| 0.2622 | 0.3643 | 0.3401 | 0.3324 | 0.3277 | 0.2978 | 0.2904 | 0.2499 | 0.2459 |
| 0.2685 | 0.3135 | 0.2844 | 0.2724 | 0.2762 | 0.2586 | 0.2558 | 0.2343 | 0.2296 |
| 0.0685 | 0.1452 | 0.1457 | 0.1506 | 0.1467 | 0.142  | 0.147  | 0.1357 | 0.1316 |
| 0.1091 | 0.1918 | 0.1883 | 0.1817 | 0.1845 | 0.175  | 0.1786 | 0.1661 | 0.1618 |
| 0.0818 | 0.1432 | 0.1538 | 0.1553 | 0.1614 | 0.1595 | 0.1705 | 0.175  | 0.1697 |
| 0.0903 | 0.0995 | 0.116  | 0.1232 | 0.1254 | 0.1395 | 0.1562 | 0.1634 | 0.1671 |
| 0.1297 | 0.2431 | 0.2278 | 0.2245 | 0.2196 | 0.2002 | 0.2006 | 0.1807 | 0.1691 |
| 0.0773 | 0.2574 | 0.2397 | 0.2524 | 0.2462 | 0.2391 | 0.2374 | 0.1875 | 0.1662 |
| 0.0785 | 0.2148 | 0.2032 | 0.1931 | 0.1923 | 0.1815 | 0.1843 | 0.1596 | 0.1585 |

|        |        |        |        |        |        |        |        |        |
|--------|--------|--------|--------|--------|--------|--------|--------|--------|
| 0.1078 | 0.2662 | 0.2505 | 0.2485 | 0.2616 | 0.2331 | 0.246  | 0.2096 | 0.2111 |
| 0.1567 | 0.3144 | 0.2861 | 0.2842 | 0.2807 | 0.2455 | 0.247  | 0.2106 | 0.2138 |
| 0.0832 | 0.2266 | 0.2084 | 0.2086 | 0.2158 | 0.1984 | 0.2052 | 0.1771 | 0.1719 |
| 0.1625 | 0.244  | 0.2393 | 0.2398 | 0.2365 | 0.2244 | 0.2289 | 0.2026 | 0.1958 |
| 0.089  | 0.2345 | 0.2367 | 0.2336 | 0.2387 | 0.2047 | 0.2105 | 0.1709 | 0.1614 |
| 0.0684 | 0.196  | 0.188  | 0.1835 | 0.1907 | 0.1744 | 0.1754 | 0.147  | 0.1515 |
| 0.3914 | 0.2813 | 0.2304 | 0.2265 | 0.2202 | 0.2211 | 0.2116 | 0.2095 | 0.2052 |
| 0.6505 | 0.4631 | 0.3909 | 0.3814 | 0.3788 | 0.368  | 0.3471 | 0.3241 | 0.3392 |
| 0.4078 | 0.3859 | 0.3356 | 0.3345 | 0.3338 | 0.3168 | 0.3197 | 0.2725 | 0.257  |
| 0.0508 | 0.0822 | 0.0759 | 0.0738 | 0.0717 | 0.0657 | 0.063  | 0.0547 | 0.0552 |
| 0.0541 | 0.0367 | 0.0311 | 0.0301 | 0.0314 | 0.0337 | 0.0319 | 0.0327 | 0.0333 |
| 0.0656 | 0.0386 | 0.033  | 0.0302 | 0.0305 | 0.0311 | 0.0279 | 0.0272 | 0.0279 |
| 0.0458 | 0.0298 | 0.0247 | 0.0237 | 0.0232 | 0.0223 | 0.0201 | 0.019  | 0.0197 |
| 0      | 0      | 0      | 0      | 0      | 0      | 0      | 0      | 0      |
| 0      | 0      | 0      | 0      | 0      | 0      | 0      | 0      | 0      |
| 0.0268 | 0.02   | 0.0175 | 0.0161 | 0.0175 | 0.017  | 0.0164 | 0.0154 | 0.0156 |
| 0.0543 | 0.0342 | 0.0289 | 0.0266 | 0.0272 | 0.0272 | 0.0254 | 0.0257 | 0.0258 |
| 0.0444 | 0.0333 | 0.0265 | 0.0267 | 0.0266 | 0.0257 | 0.0251 | 0.0236 | 0.0227 |
| 0      | 0      | 0      | 0      | 0      | 0      | 0      | 0      | 0      |
| 0.0078 | 0.0044 | 0.0037 | 0.0034 | 0.0036 | 0.0037 | 0.0037 | 0.0038 | 0.0039 |
| 0      | 0      | 0      | 0      | 0      | 0      | 0      | 0      | 0      |
| 0      | 0      | 0      | 0      | 0      | 0      | 0      | 0      | 0      |
| 0      | 0      | 0      | 0      | 0      | 0      | 0      | 0      | 0      |
| 0      | 0      | 0      | 0      | 0      | 0      | 0      | 0      | 0      |
| 0      | 0      | 0      | 0      | 0      | 0      | 0      | 0      | 0      |
| 0      | 0      | 0      | 0      | 0      | 0      | 0      | 0      | 0      |
| 0      | 0      | 0      | 0      | 0      | 0      | 0      | 0      | 0      |
| 0      | 0      | 0      | 0      | 0      | 0      | 0      | 0      | 0      |
| 0      | 0      | 0      | 0      | 0      | 0      | 0      | 0      | 0      |
| 0      | 0      | 0      | 0      | 0      | 0      | 0      | 0      | 0      |
| 0      | 0      | 0      | 0      | 0      | 0      | 0      | 0      | 0      |
| 0      | 0      | 0      | 0      | 0      | 0      | 0      | 0      | 0      |
| 0      | 0      | 0      | 0      | 0      | 0      | 0      | 0      | 0      |
| 0      | 0      | 0      | 0      | 0      | 0      | 0      | 0      | 0      |
| 0      | 0      | 0      | 0      | 0      | 0      | 0      | 0      | 0      |
| 0      | 0      | 0      | 0      | 0      | 0      | 0      | 0      | 0      |
| 0      | 0      | 0      | 0      | 0      | 0      | 0      | 0      | 0      |
| 0.1165 | 0.067  | 0.0514 | 0.0507 | 0.0528 | 0.0554 | 0.0536 | 0.0559 | 0.0542 |
| 0.591  | 0.3703 | 0.3149 | 0.3068 | 0.3149 | 0.3491 | 0.3307 | 0.3326 | 0.3261 |
| 0.7315 | 0.5762 | 0.4859 | 0.4715 | 0.4636 | 0.4402 | 0.4506 | 0.4382 | 0.4427 |
| 0.2765 | 0.3599 | 0.3352 | 0.3228 | 0.3208 | 0.2933 | 0.2921 | 0.2583 | 0.2448 |
| 0.1353 | 0.3061 | 0.2835 | 0.2845 | 0.2944 | 0.2526 | 0.2532 | 0.2004 | 0.1999 |
| 0.1444 | 0.3063 | 0.3124 | 0.2891 | 0.2979 | 0.2618 | 0.2474 | 0.1995 | 0.1998 |
| 0.135  | 0.256  | 0.2338 | 0.2357 | 0.2297 | 0.199  | 0.195  | 0.1758 | 0.1662 |
| 0.1679 | 0.2614 | 0.2292 | 0.2199 | 0.2216 | 0.1931 | 0.1931 | 0.1688 | 0.1689 |

|        |        |        |        |        |        |        |        |        |
|--------|--------|--------|--------|--------|--------|--------|--------|--------|
| 0.2904 | 0.2879 | 0.2627 | 0.2578 | 0.2564 | 0.2458 | 0.2455 | 0.2244 | 0.2169 |
| 0.1736 | 0.1928 | 0.1875 | 0.1901 | 0.1945 | 0.191  | 0.1983 | 0.1934 | 0.1926 |
| 0.0938 | 0.1199 | 0.1336 | 0.1448 | 0.1528 | 0.1627 | 0.1749 | 0.1782 | 0.1744 |
| 0.0468 | 0.0723 | 0.0806 | 0.0907 | 0.0937 | 0.1094 | 0.1233 | 0.1393 | 0.1298 |
| 0.0511 | 0.1001 | 0.1086 | 0.1134 | 0.1174 | 0.1177 | 0.1251 | 0.1239 | 0.1247 |
| 0.1244 | 0.1939 | 0.1932 | 0.1948 | 0.1969 | 0.1914 | 0.1947 | 0.1763 | 0.1721 |
| 0.1508 | 0.2386 | 0.2213 | 0.2203 | 0.2188 | 0.1931 | 0.1876 | 0.1665 | 0.1626 |
| 0.0752 | 0.2011 | 0.1964 | 0.1931 | 0.1914 | 0.1619 | 0.1657 | 0.1407 | 0.1444 |
| 0.0872 | 0.1762 | 0.1835 | 0.178  | 0.177  | 0.1654 | 0.1718 | 0.1455 | 0.1479 |
| 0.0953 | 0.1604 | 0.1601 | 0.1695 | 0.1709 | 0.1686 | 0.1748 | 0.1685 | 0.1654 |
| 0.0957 | 0.1716 | 0.1734 | 0.1823 | 0.186  | 0.1766 | 0.1878 | 0.1775 | 0.1714 |
| 0.0913 | 0.1563 | 0.1476 | 0.1497 | 0.153  | 0.142  | 0.1452 | 0.1323 | 0.1306 |
| 0.0744 | 0.0688 | 0.0617 | 0.0613 | 0.0631 | 0.0597 | 0.0584 | 0.0555 | 0.0539 |
| 0.0725 | 0.0619 | 0.0557 | 0.056  | 0.0565 | 0.0573 | 0.0575 | 0.057  | 0.0559 |
| 0.0624 | 0.0742 | 0.0693 | 0.0668 | 0.0664 | 0.0614 | 0.0616 | 0.0555 | 0.0564 |
| 0.0264 | 0.017  | 0.014  | 0.0144 | 0.0147 | 0.0139 | 0.0131 | 0.0134 | 0.0137 |
| 0      | 0      | 0      | 0      | 0      | 0      | 0      | 0      | 0      |
| 0      | 0      | 0      | 0      | 0      | 0      | 0      | 0      | 0      |
| 0      | 0      | 0      | 0      | 0      | 0      | 0      | 0      | 0      |
| 0      | 0      | 0      | 0      | 0      | 0      | 0      | 0      | 0      |
| 0      | 0      | 0      | 0      | 0      | 0      | 0      | 0      | 0      |
| 0      | 0      | 0      | 0      | 0      | 0      | 0      | 0      | 0      |
| 0      | 0      | 0      | 0      | 0      | 0      | 0      | 0      | 0      |
| 0      | 0      | 0      | 0      | 0      | 0      | 0      | 0      | 0      |
| 0      | 0      | 0      | 0      | 0      | 0      | 0      | 0      | 0      |
| 0      | 0      | 0      | 0      | 0      | 0      | 0      | 0      | 0      |
| 0      | 0      | 0      | 0      | 0      | 0      | 0      | 0      | 0      |
| 0      | 0      | 0      | 0      | 0      | 0      | 0      | 0      | 0      |
| 0      | 0      | 0      | 0      | 0      | 0      | 0      | 0      | 0      |
| 0      | 0      | 0      | 0      | 0      | 0      | 0      | 0      | 0      |
| 0      | 0      | 0      | 0      | 0      | 0      | 0      | 0      | 0      |
| 0      | 0      | 0      | 0      | 0      | 0      | 0      | 0      | 0      |
| 0      | 0      | 0      | 0      | 0      | 0      | 0      | 0      | 0      |
| 0      | 0      | 0      | 0      | 0      | 0      | 0      | 0      | 0      |
| 0      | 0      | 0      | 0      | 0      | 0      | 0      | 0      | 0      |
| 0      | 0      | 0      | 0      | 0      | 0      | 0      | 0      | 0      |
| 0      | 0      | 0      | 0      | 0      | 0      | 0      | 0      | 0      |
| 0      | 0      | 0      | 0      | 0      | 0      | 0      | 0      | 0      |
| 0      | 0      | 0      | 0      | 0      | 0      | 0      | 0      | 0      |
| 0.0063 | 0.0174 | 0.0171 | 0.0174 | 0.0162 | 0.0145 | 0.0148 | 0.0132 | 0.0122 |
| 0.1176 | 0.0773 | 0.0685 | 0.0664 | 0.0678 | 0.0681 | 0.0675 | 0.0658 | 0.063  |











|        |        |        |        |        |        |        |        |        |
|--------|--------|--------|--------|--------|--------|--------|--------|--------|
| 0      | 0      | 0      | 0      | 0      | 0      | 0      | 0      | 0      |
| 0      | 0      | 0      | 0      | 0      | 0      | 0      | 0      | 0      |
| 0      | 0      | 0      | 0      | 0      | 0      | 0      | 0      | 0      |
| 0      | 0      | 0      | 0      | 0      | 0      | 0      | 0      | 0      |
| 0      | 0      | 0      | 0      | 0      | 0      | 0      | 0      | 0      |
| 0      | 0      | 0      | 0      | 0      | 0      | 0      | 0      | 0      |
| 0      | 0      | 0      | 0      | 0      | 0      | 0      | 0      | 0      |
| 0      | 0      | 0      | 0      | 0      | 0      | 0      | 0      | 0      |
| 0      | 0      | 0      | 0      | 0      | 0      | 0      | 0      | 0      |
| 0      | 0      | 0      | 0      | 0      | 0      | 0      | 0      | 0      |
| 0      | 0      | 0      | 0      | 0      | 0      | 0      | 0      | 0      |
| 0      | 0      | 0      | 0      | 0      | 0      | 0      | 0      | 0      |
| 0      | 0      | 0      | 0      | 0      | 0      | 0      | 0      | 0      |
| 0      | 0      | 0      | 0      | 0      | 0      | 0      | 0      | 0      |
| 0      | 0      | 0      | 0      | 0      | 0      | 0      | 0      | 0      |
| 0      | 0      | 0      | 0      | 0      | 0      | 0      | 0      | 0      |
| 0      | 0      | 0      | 0      | 0      | 0      | 0      | 0      | 0      |
| 0      | 0      | 0      | 0      | 0      | 0      | 0      | 0      | 0      |
| 0      | 0      | 0      | 0      | 0      | 0      | 0      | 0      | 0      |
| 0      | 0      | 0      | 0      | 0      | 0      | 0      | 0      | 0      |
| 0      | 0      | 0      | 0      | 0      | 0      | 0      | 0      | 0      |
| 0      | 0      | 0      | 0      | 0      | 0      | 0      | 0      | 0      |
| 0      | 0      | 0      | 0      | 0      | 0      | 0      | 0      | 0      |
| 0.0543 | 0.0341 | 0.0295 | 0.028  | 0.0261 | 0.0259 | 0.0231 | 0.0243 | 0.0252 |
| 0.0023 | 0.0027 | 0.0034 | 0.004  | 0.0048 | 0.0052 | 0.0059 | 0.0062 | 0.0064 |
| 0.001  | 0.0012 | 0.0014 | 0.0016 | 0.0018 | 0.0019 | 0.0022 | 0.0024 | 0.0025 |
| 0.0265 | 0.0158 | 0.0131 | 0.0127 | 0.0125 | 0.0128 | 0.0133 | 0.0132 | 0.0126 |
| 0.0422 | 0.0247 | 0.0197 | 0.0178 | 0.0192 | 0.0174 | 0.0165 | 0.0175 | 0.017  |
| 0.025  | 0.0155 | 0.0128 | 0.0112 | 0.0111 | 0.0115 | 0.0116 | 0.0111 | 0.011  |
| 0.0175 | 0.0114 | 0.0099 | 0.0098 | 0.0104 | 0.0101 | 0.0095 | 0.0096 | 0.0097 |
| 0.0289 | 0.0184 | 0.0159 | 0.0158 | 0.0161 | 0.0162 | 0.016  | 0.0163 | 0.016  |
| 0.1546 | 0.0985 | 0.0829 | 0.0744 | 0.0775 | 0.0779 | 0.0736 | 0.0746 | 0.0747 |
| 0.0034 | 0.0062 | 0.0065 | 0.0066 | 0.0069 | 0.007  | 0.0072 | 0.0071 | 0.0069 |
| 0.0036 | 0.0061 | 0.0071 | 0.0079 | 0.0081 | 0.0087 | 0.0098 | 0.0102 | 0.0099 |
| 0.0589 | 0.0367 | 0.0308 | 0.0299 | 0.0313 | 0.0339 | 0.0345 | 0.0364 | 0.0371 |
| 0.0367 | 0.0222 | 0.0184 | 0.0162 | 0.016  | 0.0155 | 0.0153 | 0.0162 | 0.0161 |
| 0.0009 | 0.0026 | 0.0025 | 0.0024 | 0.0023 | 0.002  | 0.002  | 0.0016 | 0.0015 |
| 0.0169 | 0.0274 | 0.03   | 0.0315 | 0.0322 | 0.034  | 0.036  | 0.0363 | 0.0349 |
| 0.1113 | 0.1073 | 0.1076 | 0.1112 | 0.1178 | 0.1245 | 0.1318 | 0.1347 | 0.1359 |
| 0.0422 | 0.0301 | 0.0282 | 0.0286 | 0.0288 | 0.0298 | 0.0311 | 0.0323 | 0.032  |
| 0.0201 | 0.0162 | 0.0147 | 0.0144 | 0.0142 | 0.0137 | 0.0137 | 0.0135 | 0.0131 |
| 0      | 0      | 0      | 0      | 0      | 0      | 0      | 0      | 0      |
| 0.0017 | 0.002  | 0.0027 | 0.0028 | 0.0032 | 0.0036 | 0.0041 | 0.0043 | 0.0043 |
| 0.0107 | 0.0078 | 0.0075 | 0.0079 | 0.0083 | 0.0091 | 0.0098 | 0.0104 | 0.01   |
| 0.0173 | 0.0098 | 0.008  | 0.0078 | 0.0075 | 0.0075 | 0.0073 | 0.0076 | 0.0078 |

|        |        |        |        |        |        |        |        |        |
|--------|--------|--------|--------|--------|--------|--------|--------|--------|
| 0.0082 | 0.0049 | 0.004  | 0.0036 | 0.0038 | 0.004  | 0.0039 | 0.0041 | 0.0038 |
| 0.0098 | 0.0081 | 0.0071 | 0.0068 | 0.0065 | 0.0062 | 0.0059 | 0.0055 | 0.0058 |
| 0      | 0      | 0      | 0      | 0      | 0      | 0      | 0      | 0      |
| 0      | 0      | 0      | 0      | 0      | 0      | 0      | 0      | 0      |
| 0      | 0      | 0      | 0      | 0      | 0      | 0      | 0      | 0      |
| 0      | 0      | 0      | 0      | 0      | 0      | 0      | 0      | 0      |
| 0      | 0      | 0      | 0      | 0      | 0      | 0      | 0      | 0      |
| 0      | 0      | 0      | 0      | 0      | 0      | 0      | 0      | 0      |
| 0      | 0      | 0      | 0      | 0      | 0      | 0      | 0      | 0      |
| 0      | 0      | 0      | 0      | 0      | 0      | 0      | 0      | 0      |
| 0      | 0      | 0      | 0      | 0      | 0      | 0      | 0      | 0      |
| 0      | 0      | 0      | 0      | 0      | 0      | 0      | 0      | 0      |
| 0      | 0      | 0      | 0      | 0      | 0      | 0      | 0      | 0      |
| 0      | 0      | 0      | 0      | 0      | 0      | 0      | 0      | 0      |
| 0      | 0      | 0      | 0      | 0      | 0      | 0      | 0      | 0      |
| 0      | 0      | 0      | 0      | 0      | 0      | 0      | 0      | 0      |
| 0      | 0      | 0      | 0      | 0      | 0      | 0      | 0      | 0      |
| 0      | 0      | 0      | 0      | 0      | 0      | 0      | 0      | 0      |
| 0      | 0      | 0      | 0      | 0      | 0      | 0      | 0      | 0      |
| 0      | 0      | 0      | 0      | 0      | 0      | 0      | 0      | 0      |
| 0      | 0      | 0      | 0      | 0      | 0      | 0      | 0      | 0      |
| 0      | 0      | 0      | 0      | 0      | 0      | 0      | 0      | 0      |
| 0      | 0      | 0      | 0      | 0      | 0      | 0      | 0      | 0      |
| 0      | 0      | 0      | 0      | 0      | 0      | 0      | 0      | 0      |
| 0      | 0      | 0      | 0      | 0      | 0      | 0      | 0      | 0      |
| 0      | 0      | 0      | 0      | 0      | 0      | 0      | 0      | 0      |
| 0.1456 | 0.0947 | 0.0804 | 0.0756 | 0.0741 | 0.0703 | 0.0722 | 0.0704 | 0.0703 |
| 0.034  | 0.0232 | 0.0197 | 0.0187 | 0.0181 | 0.0186 | 0.0199 | 0.0183 | 0.0172 |
| 0.0278 | 0.0201 | 0.0167 | 0.0156 | 0.016  | 0.0157 | 0.0141 | 0.0143 | 0.0148 |
| 0.0851 | 0.0508 | 0.0428 | 0.0435 | 0.0401 | 0.0411 | 0.0425 | 0.0444 | 0.0424 |
| 0.0672 | 0.0428 | 0.0368 | 0.035  | 0.0372 | 0.038  | 0.0368 | 0.0344 | 0.0353 |
| 0.0173 | 0.0107 | 0.0087 | 0.0085 | 0.0075 | 0.0077 | 0.0075 | 0.0076 | 0.007  |
| 0.0354 | 0.0239 | 0.0195 | 0.0187 | 0.0194 | 0.0179 | 0.0163 | 0.0171 | 0.0179 |
| 0.0796 | 0.0596 | 0.0527 | 0.0515 | 0.051  | 0.0493 | 0.0476 | 0.0446 | 0.0431 |
| 0.0525 | 0.0313 | 0.0258 | 0.0265 | 0.0267 | 0.0287 | 0.0282 | 0.0293 | 0.0279 |
| 0      | 0      | 0      | 0      | 0      | 0      | 0      | 0      | 0      |
| 0.0008 | 0.0024 | 0.0023 | 0.0023 | 0.0021 | 0.0019 | 0.0019 | 0.0017 | 0.0015 |
| 0.0742 | 0.0488 | 0.0412 | 0.0399 | 0.0398 | 0.0398 | 0.0377 | 0.0386 | 0.0378 |
| 0.0934 | 0.0606 | 0.0514 | 0.0506 | 0.0508 | 0.0504 | 0.0509 | 0.0475 | 0.0483 |
| 0.0275 | 0.0183 | 0.0151 | 0.0146 | 0.0139 | 0.0135 | 0.0128 | 0.0139 | 0.0136 |
| 0.0005 | 0.0007 | 0.0009 | 0.001  | 0.0011 | 0.0011 | 0.0014 | 0.0015 | 0.0017 |
| 0.0158 | 0.0148 | 0.0161 | 0.0178 | 0.0192 | 0.0199 | 0.0211 | 0.0215 | 0.0211 |

|        |        |        |        |        |        |        |        |        |
|--------|--------|--------|--------|--------|--------|--------|--------|--------|
| 0.0428 | 0.036  | 0.0334 | 0.0338 | 0.0346 | 0.0344 | 0.0352 | 0.0348 | 0.0347 |
| 0.0231 | 0.0235 | 0.0212 | 0.0212 | 0.0214 | 0.0211 | 0.0215 | 0.0204 | 0.0204 |
| 0      | 0      | 0      | 0      | 0      | 0      | 0      | 0      | 0      |
| 0      | 0      | 0      | 0      | 0      | 0      | 0      | 0      | 0      |
| 0      | 0      | 0      | 0      | 0      | 0      | 0      | 0      | 0      |
| 0.0084 | 0.0048 | 0.004  | 0.0039 | 0.0038 | 0.0038 | 0.0036 | 0.0041 | 0.0042 |
| 0.0083 | 0.005  | 0.004  | 0.0038 | 0.0035 | 0.0036 | 0.0032 | 0.0029 | 0.003  |
| 0.0009 | 0.0026 | 0.0024 | 0.0022 | 0.0022 | 0.002  | 0.0019 | 0.0016 | 0.0017 |
| 0      | 0      | 0      | 0      | 0      | 0      | 0      | 0      | 0      |
| 0      | 0      | 0      | 0      | 0      | 0      | 0      | 0      | 0      |
| 0      | 0      | 0      | 0      | 0      | 0      | 0      | 0      | 0      |
| 0      | 0      | 0      | 0      | 0      | 0      | 0      | 0      | 0      |
| 0      | 0      | 0      | 0      | 0      | 0      | 0      | 0      | 0      |
| 0      | 0      | 0      | 0      | 0      | 0      | 0      | 0      | 0      |
| 0      | 0      | 0      | 0      | 0      | 0      | 0      | 0      | 0      |
| 0      | 0      | 0      | 0      | 0      | 0      | 0      | 0      | 0      |
| 0      | 0      | 0      | 0      | 0      | 0      | 0      | 0      | 0      |
| 0      | 0      | 0      | 0      | 0      | 0      | 0      | 0      | 0      |
| 0      | 0      | 0      | 0      | 0      | 0      | 0      | 0      | 0      |
| 0      | 0      | 0      | 0      | 0      | 0      | 0      | 0      | 0      |
| 0      | 0      | 0      | 0      | 0      | 0      | 0      | 0      | 0      |
| 0      | 0      | 0      | 0      | 0      | 0      | 0      | 0      | 0      |
| 0      | 0      | 0      | 0      | 0      | 0      | 0      | 0      | 0      |
| 0      | 0      | 0      | 0      | 0      | 0      | 0      | 0      | 0      |
| 0      | 0      | 0      | 0      | 0      | 0      | 0      | 0      | 0      |
| 0      | 0      | 0      | 0      | 0      | 0      | 0      | 0      | 0      |
| 0      | 0      | 0      | 0      | 0      | 0      | 0      | 0      | 0      |
| 0      | 0      | 0      | 0      | 0      | 0      | 0      | 0      | 0      |
| 0      | 0      | 0      | 0      | 0      | 0      | 0      | 0      | 0      |
| 0      | 0      | 0      | 0      | 0      | 0      | 0      | 0      | 0      |
| 0      | 0      | 0      | 0      | 0      | 0      | 0      | 0      | 0      |
| 0      | 0      | 0      | 0      | 0      | 0      | 0      | 0      | 0      |
| 0      | 0      | 0      | 0      | 0      | 0      | 0      | 0      | 0      |
| 0      | 0      | 0      | 0      | 0      | 0      | 0      | 0      | 0      |
| 0      | 0      | 0      | 0      | 0      | 0      | 0      | 0      | 0      |
| 0      | 0      | 0      | 0      | 0      | 0      | 0      | 0      | 0      |
| 0      | 0      | 0      | 0      | 0      | 0      | 0      | 0      | 0      |
| 0      | 0      | 0      | 0      | 0      | 0      | 0      | 0      | 0      |
| 0      | 0      | 0      | 0      | 0      | 0      | 0      | 0      | 0      |
| 0      | 0      | 0      | 0      | 0      | 0      | 0      | 0      | 0      |
| 0      | 0      | 0      | 0      | 0      | 0      | 0      | 0      | 0      |
| 0      | 0      | 0      | 0      | 0      | 0      | 0      | 0      | 0      |
| 0      | 0      | 0      | 0      | 0      | 0      | 0      | 0      | 0      |
| 0      | 0      | 0      | 0      | 0      | 0      | 0      | 0      | 0      |
| 0      | 0      | 0      | 0      | 0      | 0      | 0      | 0      | 0      |
| 0      | 0      | 0      | 0      | 0      | 0      | 0      | 0      | 0      |
| 0      | 0      | 0      | 0      | 0      | 0      | 0      | 0      | 0      |
| 0      | 0      | 0      | 0      | 0      | 0      | 0      | 0      | 0      |
| 0.0006 | 0.0008 | 0.0011 | 0.0013 | 0.0013 | 0.0015 | 0.0017 | 0.0018 | 0.0018 |
| 0.0092 | 0.0061 | 0.0055 | 0.0054 | 0.0055 | 0.0059 | 0.006  | 0.0063 | 0.0063 |
| 0.0189 | 0.0167 | 0.0145 | 0.014  | 0.014  | 0.0131 | 0.0126 | 0.0122 | 0.0127 |
| 0.0046 | 0.0106 | 0.01   | 0.0098 | 0.0095 | 0.0083 | 0.0078 | 0.0061 | 0.0061 |
| 0.0396 | 0.0239 | 0.0179 | 0.0157 | 0.0171 | 0.0165 | 0.0161 | 0.0164 | 0.0172 |
| 0.0813 | 0.0502 | 0.0411 | 0.0369 | 0.0414 | 0.043  | 0.0401 | 0.04   | 0.0419 |
| 0.0264 | 0.0165 | 0.0133 | 0.0127 | 0.0124 | 0.0123 | 0.012  | 0.0123 | 0.0125 |
| 0.0366 | 0.0272 | 0.0227 | 0.0207 | 0.0218 | 0.0209 | 0.0216 | 0.0207 | 0.0192 |
| 0.0599 | 0.0378 | 0.0331 | 0.0327 | 0.0331 | 0.0346 | 0.0343 | 0.0356 | 0.0347 |











|        |        |        |        |        |        |        |        |        |
|--------|--------|--------|--------|--------|--------|--------|--------|--------|
| 0.008  | 0.008  | 0.0077 | 0.0074 | 0.0066 | 0.0066 | 0.0067 | 0.0069 | 0.007  |
| 0.01   | 0.01   | 0.0097 | 0.0103 | 0.0105 | 0.0105 | 0.0108 | 0.0111 | 0.0108 |
| 0.0094 | 0.0096 | 0.0088 | 0.0091 | 0.0082 | 0.0077 | 0.008  | 0.0082 | 0.0085 |
| 0.0077 | 0.0084 | 0.0085 | 0.0084 | 0.0073 | 0.0071 | 0.0078 | 0.0083 | 0.0088 |
| 0      | 0      | 0      | 0      | 0      | 0      | 0      | 0      | 0      |
| 0      | 0      | 0      | 0      | 0      | 0      | 0      | 0      | 0      |
| 0      | 0      | 0      | 0      | 0      | 0      | 0      | 0      | 0      |
| 0      | 0      | 0      | 0      | 0      | 0      | 0      | 0      | 0      |
| 0      | 0      | 0      | 0      | 0      | 0      | 0      | 0      | 0      |
| 0      | 0      | 0      | 0      | 0      | 0      | 0      | 0      | 0      |
| 0      | 0      | 0      | 0      | 0      | 0      | 0      | 0      | 0      |
| 0      | 0      | 0      | 0      | 0      | 0      | 0      | 0      | 0      |
| 0      | 0      | 0      | 0      | 0      | 0      | 0      | 0      | 0      |
| 0      | 0      | 0      | 0      | 0      | 0      | 0      | 0      | 0      |
| 0      | 0      | 0      | 0      | 0      | 0      | 0      | 0      | 0      |
| 0      | 0      | 0      | 0      | 0      | 0      | 0      | 0      | 0      |
| 0      | 0      | 0      | 0      | 0      | 0      | 0      | 0      | 0      |
| 0      | 0      | 0      | 0      | 0      | 0      | 0      | 0      | 0      |
| 0      | 0      | 0      | 0      | 0      | 0      | 0      | 0      | 0      |
| 0      | 0      | 0      | 0      | 0      | 0      | 0      | 0      | 0      |
| 0      | 0      | 0      | 0      | 0      | 0      | 0      | 0      | 0      |
| 0      | 0      | 0      | 0      | 0      | 0      | 0      | 0      | 0      |
| 0      | 0      | 0      | 0      | 0      | 0      | 0      | 0      | 0      |
| 0      | 0      | 0      | 0      | 0      | 0      | 0      | 0      | 0      |
| 0      | 0      | 0      | 0      | 0      | 0      | 0      | 0      | 0      |
| 0      | 0      | 0      | 0      | 0      | 0      | 0      | 0      | 0      |
| 0      | 0      | 0      | 0      | 0      | 0      | 0      | 0      | 0      |
| 0      | 0      | 0      | 0      | 0      | 0      | 0      | 0      | 0      |
| 0      | 0      | 0      | 0      | 0      | 0      | 0      | 0      | 0      |
| 0      | 0      | 0      | 0      | 0      | 0      | 0      | 0      | 0      |
| 0      | 0      | 0      | 0      | 0      | 0      | 0      | 0      | 0      |
| 0      | 0      | 0      | 0      | 0      | 0      | 0      | 0      | 0      |
| 0      | 0      | 0      | 0      | 0      | 0      | 0      | 0      | 0      |
| 0      | 0      | 0      | 0      | 0      | 0      | 0      | 0      | 0      |
| 0.0174 | 0.0173 | 0.0157 | 0.0163 | 0.0145 | 0.0153 | 0.0154 | 0.0156 | 0.0153 |
| 0.0018 | 0.0017 | 0.0018 | 0.0019 | 0.0019 | 0.0019 | 0.0021 | 0.0022 | 0.0023 |
| 0.0163 | 0.0162 | 0.016  | 0.0155 | 0.0139 | 0.016  | 0.0154 | 0.0155 | 0.0156 |
| 0.0231 | 0.0231 | 0.023  | 0.0225 | 0.0206 | 0.0212 | 0.0197 | 0.0194 | 0.0191 |
| 0.001  | 0.001  | 0.001  | 0.001  | 0.001  | 0.0011 | 0.0011 | 0.0011 | 0.0012 |
| 0.0009 | 0.0009 | 0.0009 | 0.001  | 0.001  | 0.001  | 0.001  | 0.001  | 0.0011 |
| 0      | 0      | 0      | 0      | 0      | 0      | 0      | 0      | 0      |
| 0.0248 | 0.0249 | 0.0248 | 0.0236 | 0.0215 | 0.0209 | 0.0197 | 0.0183 | 0.0187 |
| 0      | 0      | 0      | 0      | 0      | 0      | 0      | 0      | 0      |
| 0      | 0      | 0      | 0      | 0      | 0      | 0      | 0      | 0      |
| 0      | 0      | 0      | 0      | 0      | 0      | 0      | 0      | 0      |
| 0      | 0      | 0      | 0      | 0      | 0      | 0      | 0      | 0      |
| 0      | 0      | 0      | 0      | 0      | 0      | 0      | 0      | 0      |
| 0.0078 | 0.0081 | 0.0079 | 0.0077 | 0.0075 | 0.0079 | 0.0081 | 0.0077 | 0.0078 |

|        |        |        |        |        |        |        |        |        |
|--------|--------|--------|--------|--------|--------|--------|--------|--------|
| 0.0038 | 0.0038 | 0.0039 | 0.0038 | 0.0035 | 0.0035 | 0.0034 | 0.0035 | 0.0037 |
| 0      | 0      | 0      | 0      | 0      | 0      | 0      | 0      | 0      |
| 0      | 0      | 0      | 0      | 0      | 0      | 0      | 0      | 0      |
| 0      | 0      | 0      | 0      | 0      | 0      | 0      | 0      | 0      |
| 0      | 0      | 0      | 0      | 0      | 0      | 0      | 0      | 0      |
| 0.0111 | 0.0113 | 0.0104 | 0.0105 | 0.0098 | 0.0089 | 0.0097 | 0.0091 | 0.0095 |
| 0.0159 | 0.0161 | 0.0134 | 0.0145 | 0.0131 | 0.0138 | 0.0148 | 0.0153 | 0.0171 |
| 0.0105 | 0.0115 | 0.0114 | 0.0116 | 0.0111 | 0.0122 | 0.0113 | 0.0112 | 0.0117 |
| 0.003  | 0.0031 | 0.0031 | 0.0033 | 0.0032 | 0.0035 | 0.0033 | 0.0031 | 0.0029 |
| 0      | 0      | 0      | 0      | 0      | 0      | 0      | 0      | 0      |
| 0      | 0      | 0      | 0      | 0      | 0      | 0      | 0      | 0      |
| 0      | 0      | 0      | 0      | 0      | 0      | 0      | 0      | 0      |
| 0      | 0      | 0      | 0      | 0      | 0      | 0      | 0      | 0      |
| 0      | 0      | 0      | 0      | 0      | 0      | 0      | 0      | 0      |
| 0      | 0      | 0      | 0      | 0      | 0      | 0      | 0      | 0      |
| 0      | 0      | 0      | 0      | 0      | 0      | 0      | 0      | 0      |
| 0      | 0      | 0      | 0      | 0      | 0      | 0      | 0      | 0      |
| 0      | 0      | 0      | 0      | 0      | 0      | 0      | 0      | 0      |
| 0      | 0      | 0      | 0      | 0      | 0      | 0      | 0      | 0      |
| 0      | 0      | 0      | 0      | 0      | 0      | 0      | 0      | 0      |
| 0      | 0      | 0      | 0      | 0      | 0      | 0      | 0      | 0      |
| 0      | 0      | 0      | 0      | 0      | 0      | 0      | 0      | 0      |
| 0      | 0      | 0      | 0      | 0      | 0      | 0      | 0      | 0      |
| 0      | 0      | 0      | 0      | 0      | 0      | 0      | 0      | 0      |
| 0      | 0      | 0      | 0      | 0      | 0      | 0      | 0      | 0      |
| 0      | 0      | 0      | 0      | 0      | 0      | 0      | 0      | 0      |
| 0      | 0      | 0      | 0      | 0      | 0      | 0      | 0      | 0      |
| 0      | 0      | 0      | 0      | 0      | 0      | 0      | 0      | 0      |
| 0      | 0      | 0      | 0      | 0      | 0      | 0      | 0      | 0      |
| 0      | 0      | 0      | 0      | 0      | 0      | 0      | 0      | 0      |
| 0      | 0      | 0      | 0      | 0      | 0      | 0      | 0      | 0      |
| 0      | 0      | 0      | 0      | 0      | 0      | 0      | 0      | 0      |
| 0      | 0      | 0      | 0      | 0      | 0      | 0      | 0      | 0      |
| 0      | 0      | 0      | 0      | 0      | 0      | 0      | 0      | 0      |
| 0      | 0      | 0      | 0      | 0      | 0      | 0      | 0      | 0      |
| 0.0278 | 0.0293 | 0.0284 | 0.0307 | 0.0292 | 0.0303 | 0.0317 | 0.0298 | 0.0267 |
| 0.0104 | 0.0125 | 0.0133 | 0.0134 | 0.013  | 0.014  | 0.0141 | 0.0146 | 0.0146 |
| 0.0308 | 0.0313 | 0.032  | 0.0294 | 0.0296 | 0.0313 | 0.0303 | 0.0301 | 0.0294 |
| 0.0331 | 0.0342 | 0.0292 | 0.031  | 0.0326 | 0.0337 | 0.0329 | 0.0321 | 0.0341 |
| 0.0099 | 0.0097 | 0.0099 | 0.0106 | 0.0093 | 0.0099 | 0.0094 | 0.0099 | 0.0099 |
| 0.0063 | 0.007  | 0.007  | 0.0072 | 0.0064 | 0.0071 | 0.0072 | 0.007  | 0.0071 |
| 0.0246 | 0.0242 | 0.0243 | 0.025  | 0.0208 | 0.021  | 0.0199 | 0.0179 | 0.0204 |
| 0.0275 | 0.0316 | 0.0297 | 0.0292 | 0.0287 | 0.0303 | 0.0284 | 0.0264 | 0.0261 |

|        |        |        |        |        |        |        |        |        |
|--------|--------|--------|--------|--------|--------|--------|--------|--------|
| 0.0451 | 0.0406 | 0.0398 | 0.0397 | 0.0354 | 0.0377 | 0.0391 | 0.039  | 0.0368 |
| 0.0383 | 0.0365 | 0.0323 | 0.0324 | 0.0322 | 0.0315 | 0.0314 | 0.0316 | 0.0301 |
| 0.0361 | 0.0338 | 0.0334 | 0.0345 | 0.032  | 0.0335 | 0.033  | 0.0337 | 0.0354 |
| 0.0316 | 0.0334 | 0.0317 | 0.0316 | 0.0291 | 0.0295 | 0.0291 | 0.027  | 0.0297 |
| 0.0297 | 0.0314 | 0.0279 | 0.0287 | 0.0293 | 0.0286 | 0.0296 | 0.026  | 0.0308 |
| 0.0227 | 0.0222 | 0.0214 | 0.023  | 0.0202 | 0.0218 | 0.0231 | 0.0229 | 0.0229 |
| 0.0032 | 0.0035 | 0.0033 | 0.0035 | 0.0034 | 0.0038 | 0.0037 | 0.0037 | 0.0037 |
| 0      | 0      | 0      | 0      | 0      | 0      | 0      | 0      | 0      |
| 0      | 0      | 0      | 0      | 0      | 0      | 0      | 0      | 0      |
| 0      | 0      | 0      | 0      | 0      | 0      | 0      | 0      | 0      |
| 0.0039 | 0.0036 | 0.0034 | 0.0035 | 0.0031 | 0.003  | 0.003  | 0.003  | 0.0031 |
| 0.0103 | 0.0109 | 0.0107 | 0.0103 | 0.0101 | 0.01   | 0.0089 | 0.009  | 0.0092 |
| 0.0157 | 0.0168 | 0.0166 | 0.0179 | 0.0177 | 0.0175 | 0.0175 | 0.0169 | 0.0168 |
| 0.0173 | 0.0167 | 0.0153 | 0.0145 | 0.0131 | 0.0128 | 0.0126 | 0.0131 | 0.0134 |
| 0.0076 | 0.0072 | 0.0072 | 0.0078 | 0.0072 | 0.0069 | 0.0072 | 0.0071 | 0.0077 |
| 0      | 0      | 0      | 0      | 0      | 0      | 0      | 0      | 0      |
| 0      | 0      | 0      | 0      | 0      | 0      | 0      | 0      | 0      |
| 0      | 0      | 0      | 0      | 0      | 0      | 0      | 0      | 0      |
| 0      | 0      | 0      | 0      | 0      | 0      | 0      | 0      | 0      |
| 0      | 0      | 0      | 0      | 0      | 0      | 0      | 0      | 0      |
| 0      | 0      | 0      | 0      | 0      | 0      | 0      | 0      | 0      |
| 0      | 0      | 0      | 0      | 0      | 0      | 0      | 0      | 0      |
| 0      | 0      | 0      | 0      | 0      | 0      | 0      | 0      | 0      |
| 0      | 0      | 0      | 0      | 0      | 0      | 0      | 0      | 0      |
| 0      | 0      | 0      | 0      | 0      | 0      | 0      | 0      | 0      |
| 0      | 0      | 0      | 0      | 0      | 0      | 0      | 0      | 0      |
| 0      | 0      | 0      | 0      | 0      | 0      | 0      | 0      | 0      |
| 0      | 0      | 0      | 0      | 0      | 0      | 0      | 0      | 0      |
| 0      | 0      | 0      | 0      | 0      | 0      | 0      | 0      | 0      |
| 0      | 0      | 0      | 0      | 0      | 0      | 0      | 0      | 0      |
| 0      | 0      | 0      | 0      | 0      | 0      | 0      | 0      | 0      |
| 0      | 0      | 0      | 0      | 0      | 0      | 0      | 0      | 0      |
| 0      | 0      | 0      | 0      | 0      | 0      | 0      | 0      | 0      |
| 0      | 0      | 0      | 0      | 0      | 0      | 0      | 0      | 0      |
| 0      | 0      | 0      | 0      | 0      | 0      | 0      | 0      | 0      |
| 0      | 0      | 0      | 0      | 0      | 0      | 0      | 0      | 0      |
| 0      | 0      | 0      | 0      | 0      | 0      | 0      | 0      | 0      |
| 0      | 0      | 0      | 0      | 0      | 0      | 0      | 0      | 0      |
| 0.0031 | 0.0032 | 0.0032 | 0.0031 | 0.0033 | 0.0034 | 0.0034 | 0.0034 | 0.0035 |
| 0.0622 | 0.0651 | 0.063  | 0.0627 | 0.0551 | 0.0577 | 0.0557 | 0.0566 | 0.0607 |













|        |        |        |        |        |        |        |        |        |
|--------|--------|--------|--------|--------|--------|--------|--------|--------|
| 0.0133 | 0.0124 | 0.0118 | 0.0125 | 0.0126 | 0.014  | 0.0139 | 0.0129 | 0.0124 |
| 0.0198 | 0.0192 | 0.0205 | 0.0222 | 0.0202 | 0.0223 | 0.0207 | 0.0183 | 0.0191 |
| 0      | 0      | 0      | 0      | 0      | 0      | 0      | 0      | 0      |
| 0      | 0      | 0      | 0      | 0      | 0      | 0      | 0      | 0      |
| 0      | 0      | 0      | 0      | 0      | 0      | 0      | 0      | 0      |
| 0      | 0      | 0      | 0      | 0      | 0      | 0      | 0      | 0      |
| 0      | 0      | 0      | 0      | 0      | 0      | 0      | 0      | 0      |
| 0      | 0      | 0      | 0      | 0      | 0      | 0      | 0      | 0      |
| 0      | 0      | 0      | 0      | 0      | 0      | 0      | 0      | 0      |
| 0      | 0      | 0      | 0      | 0      | 0      | 0      | 0      | 0      |
| 0      | 0      | 0      | 0      | 0      | 0      | 0      | 0      | 0      |
| 0      | 0      | 0      | 0      | 0      | 0      | 0      | 0      | 0      |
| 0.0041 | 0.0039 | 0.004  | 0.0041 | 0.0044 | 0.0045 | 0.0045 | 0.0044 | 0.0042 |
| 0.005  | 0.0043 | 0.0041 | 0.0036 | 0.0038 | 0.0041 | 0.0046 | 0.0046 | 0.0035 |
| 0.023  | 0.0225 | 0.0229 | 0.0233 | 0.0232 | 0.0246 | 0.0257 | 0.0257 | 0.0262 |
| 0.0034 | 0.0035 | 0.0032 | 0.0032 | 0.0029 | 0.0034 | 0.0036 | 0.0037 | 0.0036 |
| 0.0124 | 0.0121 | 0.0127 | 0.0129 | 0.0128 | 0.0137 | 0.0141 | 0.0141 | 0.0145 |
| 0.009  | 0.0092 | 0.009  | 0.0087 | 0.0087 | 0.0093 | 0.0094 | 0.0094 | 0.0097 |
| 0.0074 | 0.0072 | 0.0066 | 0.0074 | 0.0069 | 0.0073 | 0.0069 | 0.0072 | 0.0077 |
| 0      | 0      | 0      | 0      | 0      | 0      | 0      | 0      | 0      |
| 0.0213 | 0.0215 | 0.0215 | 0.0214 | 0.0219 | 0.0226 | 0.0235 | 0.0235 | 0.0239 |
| 0.0143 | 0.0146 | 0.0143 | 0.0136 | 0.013  | 0.0134 | 0.0143 | 0.0145 | 0.014  |
| 0.0349 | 0.0352 | 0.0348 | 0.0359 | 0.0347 | 0.0372 | 0.033  | 0.0353 | 0.0336 |
| 0.0135 | 0.0141 | 0.0136 | 0.0137 | 0.0141 | 0.0142 | 0.0148 | 0.015  | 0.0156 |
| 0.0313 | 0.0314 | 0.0316 | 0.0326 | 0.0321 | 0.033  | 0.0339 | 0.0353 | 0.0357 |
| 0.0843 | 0.0857 | 0.0845 | 0.0814 | 0.0805 | 0.0846 | 0.0886 | 0.0907 | 0.0893 |
| 0.0112 | 0.0113 | 0.0113 | 0.0115 | 0.0119 | 0.0118 | 0.0116 | 0.0126 | 0.0122 |
| 0.0551 | 0.0556 | 0.0569 | 0.0563 | 0.0538 | 0.0579 | 0.0573 | 0.0532 | 0.055  |
| 0.1359 | 0.1406 | 0.127  | 0.1301 | 0.122  | 0.1272 | 0.1201 | 0.1102 | 0.1147 |
| 0.1418 | 0.1453 | 0.134  | 0.1401 | 0.1424 | 0.1591 | 0.1566 | 0.1487 | 0.1565 |
| 0.0402 | 0.0454 | 0.0451 | 0.0444 | 0.0405 | 0.0451 | 0.0404 | 0.0388 | 0.0389 |
| 0.0048 | 0.0051 | 0.0056 | 0.0057 | 0.0063 | 0.006  | 0.006  | 0.0061 | 0.006  |
| 0.024  | 0.0247 | 0.025  | 0.0266 | 0.0257 | 0.0252 | 0.0248 | 0.0241 | 0.0236 |
| 0.0312 | 0.0319 | 0.0282 | 0.0287 | 0.0249 | 0.0263 | 0.0266 | 0.0278 | 0.0282 |
| 0      | 0      | 0      | 0      | 0      | 0      | 0      | 0      | 0      |
| 0.1434 | 0.1534 | 0.146  | 0.1393 | 0.1347 | 0.1473 | 0.1474 | 0.1327 | 0.1305 |
| 0.1885 | 0.1904 | 0.1788 | 0.1842 | 0.1758 | 0.1777 | 0.1633 | 0.1597 | 0.1584 |
| 0.3031 | 0.3    | 0.2644 | 0.2931 | 0.2821 | 0.2543 | 0.2593 | 0.256  | 0.2602 |
| 0.1269 | 0.1272 | 0.1209 | 0.1168 | 0.1165 | 0.1053 | 0.1091 | 0.117  | 0.1183 |
| 0.0986 | 0.1056 | 0.1069 | 0.1126 | 0.1112 | 0.1094 | 0.1135 | 0.1196 | 0.119  |
| 0.5157 | 0.5933 | 0.5519 | 0.5599 | 0.5137 | 0.5485 | 0.5187 | 0.485  | 0.4488 |
| 0.3847 | 0.4156 | 0.4088 | 0.4375 | 0.4237 | 0.4467 | 0.413  | 0.3796 | 0.4265 |
| 0.156  | 0.1564 | 0.1519 | 0.1513 | 0.1467 | 0.1548 | 0.1405 | 0.1366 | 0.1454 |

|        |        |        |        |        |        |        |        |        |
|--------|--------|--------|--------|--------|--------|--------|--------|--------|
| 0.2993 | 0.3441 | 0.3299 | 0.3251 | 0.3105 | 0.3505 | 0.3372 | 0.3374 | 0.3226 |
| 0.3844 | 0.425  | 0.3987 | 0.4279 | 0.3963 | 0.3906 | 0.373  | 0.3997 | 0.3928 |
| 0.3619 | 0.3681 | 0.3568 | 0.3469 | 0.2956 | 0.3437 | 0.339  | 0.334  | 0.3486 |
| 0.237  | 0.2485 | 0.2325 | 0.2334 | 0.2124 | 0.2216 | 0.2168 | 0.2013 | 0.1958 |
| 0.0873 | 0.0836 | 0.079  | 0.0756 | 0.0731 | 0.0735 | 0.0694 | 0.065  | 0.0646 |
| 0.0034 | 0.0032 | 0.0037 | 0.0037 | 0.004  | 0.0041 | 0.0042 | 0.004  | 0.0039 |
| 0      | 0      | 0      | 0      | 0      | 0      | 0      | 0      | 0      |
| 0.0038 | 0.0038 | 0.0037 | 0.0037 | 0.0038 | 0.0039 | 0.0041 | 0.0039 | 0.0037 |
| 0      | 0      | 0      | 0      | 0      | 0      | 0      | 0      | 0      |
| 0      | 0      | 0      | 0      | 0      | 0      | 0      | 0      | 0      |
| 0      | 0      | 0      | 0      | 0      | 0      | 0      | 0      | 0      |
| 0      | 0      | 0      | 0      | 0      | 0      | 0      | 0      | 0      |
| 0      | 0      | 0      | 0      | 0      | 0      | 0      | 0      | 0      |
| 0      | 0      | 0      | 0      | 0      | 0      | 0      | 0      | 0      |
| 0      | 0      | 0      | 0      | 0      | 0      | 0      | 0      | 0      |
| 0      | 0      | 0      | 0      | 0      | 0      | 0      | 0      | 0      |
| 0      | 0      | 0      | 0      | 0      | 0      | 0      | 0      | 0      |
| 0      | 0      | 0      | 0      | 0      | 0      | 0      | 0      | 0      |
| 0.017  | 0.0161 | 0.0167 | 0.0168 | 0.018  | 0.0188 | 0.0195 | 0.0197 | 0.0195 |
| 0.0096 | 0.0088 | 0.0095 | 0.0096 | 0.0104 | 0.0109 | 0.0116 | 0.0115 | 0.0123 |
| 0      | 0      | 0      | 0      | 0      | 0      | 0      | 0      | 0      |
| 0      | 0      | 0      | 0      | 0      | 0      | 0      | 0      | 0      |
| 0.0035 | 0.0036 | 0.0035 | 0.0034 | 0.003  | 0.0032 | 0.0036 | 0.0035 | 0.0033 |
| 0.0185 | 0.018  | 0.018  | 0.018  | 0.0184 | 0.0189 | 0.0191 | 0.0189 | 0.0189 |
| 0.0237 | 0.0229 | 0.0236 | 0.0233 | 0.0241 | 0.0254 | 0.0263 | 0.0265 | 0.0263 |
| 0.013  | 0.0131 | 0.0133 | 0.0134 | 0.0138 | 0.0145 | 0.015  | 0.0148 | 0.015  |
| 0.0427 | 0.0428 | 0.043  | 0.0435 | 0.0444 | 0.0455 | 0.0463 | 0.0456 | 0.0456 |
| 0.0408 | 0.0404 | 0.0365 | 0.0381 | 0.034  | 0.036  | 0.0329 | 0.0369 | 0.0373 |
| 0.0255 | 0.026  | 0.0259 | 0.0261 | 0.0264 | 0.028  | 0.0291 | 0.0292 | 0.0287 |
| 0.0099 | 0.0089 | 0.0091 | 0.0086 | 0.0089 | 0.0094 | 0.01   | 0.0098 | 0.0091 |
| 0.0491 | 0.0449 | 0.044  | 0.045  | 0.0495 | 0.052  | 0.0533 | 0.0523 | 0.0559 |
| 0.1638 | 0.1529 | 0.1575 | 0.1566 | 0.1614 | 0.1538 | 0.1606 | 0.1617 | 0.1712 |
| 0.2563 | 0.2553 | 0.2543 | 0.2639 | 0.2772 | 0.2779 | 0.2855 | 0.2883 | 0.2983 |
| 0.1842 | 0.1814 | 0.1929 | 0.1943 | 0.2036 | 0.2195 | 0.2269 | 0.2375 | 0.2367 |
| 0.0353 | 0.0346 | 0.0364 | 0.0357 | 0.0393 | 0.0413 | 0.0441 | 0.0444 | 0.0446 |
| 0.0137 | 0.0144 | 0.0138 | 0.014  | 0.0134 | 0.0134 | 0.0135 | 0.0126 | 0.0123 |
| 0.0216 | 0.0232 | 0.0222 | 0.0224 | 0.0222 | 0.0219 | 0.0224 | 0.0219 | 0.0228 |
| 0.0171 | 0.0173 | 0.017  | 0.0177 | 0.0156 | 0.0168 | 0.0165 | 0.0167 | 0.0166 |
| 0.0171 | 0.0173 | 0.017  | 0.0175 | 0.0168 | 0.018  | 0.0179 | 0.0179 | 0.0181 |
| 0      | 0      | 0      | 0      | 0      | 0      | 0      | 0      | 0      |
| 0.0239 | 0.0252 | 0.0256 | 0.0269 | 0.0255 | 0.0249 | 0.0236 | 0.0245 | 0.0236 |
| 0.0749 | 0.0769 | 0.074  | 0.0739 | 0.0723 | 0.0717 | 0.0721 | 0.0726 | 0.0736 |
| 0.128  | 0.1333 | 0.1291 | 0.1267 | 0.1192 | 0.129  | 0.1255 | 0.1195 | 0.1312 |
| 0.182  | 0.1899 | 0.2003 | 0.1903 | 0.1763 | 0.1837 | 0.1776 | 0.176  | 0.1841 |

|        |        |        |        |        |        |        |        |        |
|--------|--------|--------|--------|--------|--------|--------|--------|--------|
| 0.1941 | 0.2082 | 0.187  | 0.1779 | 0.1678 | 0.1829 | 0.1827 | 0.1872 | 0.2027 |
| 0.1103 | 0.1173 | 0.1123 | 0.115  | 0.1032 | 0.1111 | 0.1039 | 0.0948 | 0.0947 |
| 0.1533 | 0.158  | 0.1522 | 0.1581 | 0.1659 | 0.168  | 0.1534 | 0.1543 | 0.1666 |
| 0.2588 | 0.2582 | 0.2559 | 0.2784 | 0.2886 | 0.292  | 0.2737 | 0.2792 | 0.2822 |
| 0.1803 | 0.1755 | 0.1837 | 0.1823 | 0.1854 | 0.1802 | 0.1844 | 0.1875 | 0.1939 |
| 0.204  | 0.225  | 0.2178 | 0.2311 | 0.2015 | 0.2126 | 0.189  | 0.1859 | 0.184  |
| 0.3423 | 0.3647 | 0.349  | 0.3721 | 0.3425 | 0.3442 | 0.334  | 0.3296 | 0.3244 |
| 0.4286 | 0.4568 | 0.4661 | 0.4495 | 0.4286 | 0.4633 | 0.4807 | 0.4868 | 0.5043 |
| 0.4614 | 0.4588 | 0.4902 | 0.4783 | 0.4703 | 0.4613 | 0.4738 | 0.4444 | 0.4134 |
| 0.3389 | 0.3374 | 0.3005 | 0.3175 | 0.2992 | 0.3322 | 0.3349 | 0.3238 | 0.3203 |
| 0.198  | 0.1967 | 0.1933 | 0.1954 | 0.1791 | 0.1812 | 0.1788 | 0.1733 | 0.1797 |
| 0.0528 | 0.0527 | 0.0493 | 0.0513 | 0.0486 | 0.0514 | 0.0505 | 0.0484 | 0.0455 |
| 0.0007 | 0.0007 | 0.0008 | 0.0008 | 0.0009 | 0.001  | 0.001  | 0.0011 | 0.0011 |
| 0.0255 | 0.0252 | 0.0242 | 0.0226 | 0.0228 | 0.0241 | 0.0248 | 0.0236 | 0.0237 |
| 0      | 0      | 0      | 0      | 0      | 0      | 0      | 0      | 0      |
| 0      | 0      | 0      | 0      | 0      | 0      | 0      | 0      | 0      |
| 0      | 0      | 0      | 0      | 0      | 0      | 0      | 0      | 0      |
| 0      | 0      | 0      | 0      | 0      | 0      | 0      | 0      | 0      |
| 0      | 0      | 0      | 0      | 0      | 0      | 0      | 0      | 0      |
| 0      | 0      | 0      | 0      | 0      | 0      | 0      | 0      | 0      |
| 0      | 0      | 0      | 0      | 0      | 0      | 0      | 0      | 0      |
| 0      | 0      | 0      | 0      | 0      | 0      | 0      | 0      | 0      |
| 0      | 0      | 0      | 0      | 0      | 0      | 0      | 0      | 0      |
| 0      | 0      | 0      | 0      | 0      | 0      | 0      | 0      | 0      |
| 0.0049 | 0.0045 | 0.0045 | 0.0046 | 0.0045 | 0.004  | 0.0044 | 0.0044 | 0.0045 |
| 0.0101 | 0.0103 | 0.0108 | 0.0108 | 0.0117 | 0.0127 | 0.0133 | 0.0137 | 0.0139 |
| 0.0288 | 0.0287 | 0.0299 | 0.0327 | 0.0348 | 0.0345 | 0.0357 | 0.0341 | 0.0369 |
| 0.0122 | 0.0115 | 0.012  | 0.0124 | 0.0128 | 0.0134 | 0.0141 | 0.0138 | 0.014  |
| 0.0034 | 0.0033 | 0.0035 | 0.0035 | 0.0036 | 0.0035 | 0.0036 | 0.0036 | 0.0036 |
| 0.0008 | 0.0007 | 0.0007 | 0.0006 | 0.0006 | 0.0006 | 0.0007 | 0.0007 | 0.0006 |
| 0.0192 | 0.018  | 0.019  | 0.0196 | 0.0207 | 0.022  | 0.0227 | 0.0229 | 0.0224 |
| 0.014  | 0.0131 | 0.0142 | 0.0143 | 0.0152 | 0.0164 | 0.017  | 0.0174 | 0.0178 |
| 0.0273 | 0.0271 | 0.0264 | 0.0267 | 0.0256 | 0.0276 | 0.029  | 0.029  | 0.0297 |
| 0.0273 | 0.0273 | 0.0279 | 0.0295 | 0.0303 | 0.0332 | 0.0351 | 0.0346 | 0.0342 |
| 0.1226 | 0.1139 | 0.1097 | 0.1084 | 0.1136 | 0.1157 | 0.1227 | 0.1209 | 0.1214 |
| 0.201  | 0.1948 | 0.1949 | 0.1911 | 0.1908 | 0.1905 | 0.1961 | 0.1922 | 0.1928 |
| 0.188  | 0.1828 | 0.1809 | 0.1801 | 0.1806 | 0.1834 | 0.1877 | 0.1858 | 0.182  |
| 0.2    | 0.1978 | 0.2151 | 0.2218 | 0.2314 | 0.2362 | 0.2467 | 0.2468 | 0.2524 |
| 0.2618 | 0.2571 | 0.248  | 0.2494 | 0.2664 | 0.2759 | 0.2803 | 0.279  | 0.2809 |
| 0.2563 | 0.2519 | 0.2603 | 0.2581 | 0.2768 | 0.2878 | 0.2955 | 0.2901 | 0.2881 |
| 0.1976 | 0.2015 | 0.2113 | 0.2136 | 0.2225 | 0.235  | 0.2394 | 0.2407 | 0.2445 |
| 0.03   | 0.0301 | 0.0302 | 0.0298 | 0.0299 | 0.0307 | 0.0313 | 0.031  | 0.0314 |
| 0.0046 | 0.0048 | 0.0051 | 0.0054 | 0.0058 | 0.0065 | 0.0073 | 0.0074 | 0.0076 |
| 0.0169 | 0.0172 | 0.0153 | 0.0162 | 0.0154 | 0.0152 | 0.0159 | 0.0151 | 0.0133 |

|        |        |        |        |        |        |        |        |        |
|--------|--------|--------|--------|--------|--------|--------|--------|--------|
| 0.0524 | 0.0531 | 0.0531 | 0.0513 | 0.0501 | 0.0524 | 0.0495 | 0.0534 | 0.0508 |
| 0.03   | 0.0313 | 0.0312 | 0.0296 | 0.0288 | 0.0295 | 0.0299 | 0.0288 | 0.0282 |
| 0.0162 | 0.0186 | 0.0177 | 0.0177 | 0.0168 | 0.0175 | 0.0192 | 0.019  | 0.019  |
| 0.0606 | 0.0615 | 0.0629 | 0.06   | 0.0598 | 0.0553 | 0.0591 | 0.0521 | 0.0487 |
| 0.0462 | 0.0438 | 0.046  | 0.0457 | 0.0463 | 0.0475 | 0.045  | 0.0419 | 0.0442 |
| 0.0417 | 0.0437 | 0.0429 | 0.0453 | 0.0427 | 0.0453 | 0.042  | 0.0383 | 0.0337 |
| 0.008  | 0.0075 | 0.0073 | 0.0072 | 0.0078 | 0.0076 | 0.008  | 0.0076 | 0.0069 |
| 0.0325 | 0.0325 | 0.0299 | 0.0309 | 0.0301 | 0.0324 | 0.0321 | 0.0333 | 0.034  |
| 0.1864 | 0.1944 | 0.1798 | 0.1938 | 0.1973 | 0.1919 | 0.2026 | 0.2045 | 0.2002 |
| 0.1341 | 0.1412 | 0.1317 | 0.1318 | 0.1256 | 0.1364 | 0.1329 | 0.1393 | 0.1363 |
| 0.0767 | 0.0786 | 0.0776 | 0.0725 | 0.0677 | 0.072  | 0.0709 | 0.0662 | 0.071  |
| 0.3226 | 0.3294 | 0.3127 | 0.3238 | 0.3119 | 0.3349 | 0.3426 | 0.335  | 0.3193 |
| 0.3814 | 0.4049 | 0.3887 | 0.4045 | 0.359  | 0.3846 | 0.3948 | 0.3819 | 0.3935 |
| 0.2466 | 0.2631 | 0.244  | 0.2543 | 0.2432 | 0.2509 | 0.2913 | 0.3008 | 0.3176 |
| 0.2209 | 0.2256 | 0.2046 | 0.1931 | 0.174  | 0.1796 | 0.1704 | 0.1658 | 0.1849 |
| 0.1632 | 0.1708 | 0.1794 | 0.1855 | 0.179  | 0.1902 | 0.1757 | 0.172  | 0.176  |
| 0.1328 | 0.1376 | 0.1448 | 0.1391 | 0.1299 | 0.1399 | 0.1471 | 0.1494 | 0.1655 |
| 0.1129 | 0.1124 | 0.1021 | 0.1043 | 0.091  | 0.0946 | 0.0916 | 0.0984 | 0.0963 |
| 0      | 0      | 0      | 0      | 0      | 0      | 0      | 0      | 0      |
| 0.0159 | 0.0163 | 0.0161 | 0.0167 | 0.0164 | 0.0171 | 0.0169 | 0.0167 | 0.0173 |
| 0      | 0      | 0      | 0      | 0      | 0      | 0      | 0      | 0      |
| 0      | 0      | 0      | 0      | 0      | 0      | 0      | 0      | 0      |
| 0      | 0      | 0      | 0      | 0      | 0      | 0      | 0      | 0      |
| 0      | 0      | 0      | 0      | 0      | 0      | 0      | 0      | 0      |
| 0      | 0      | 0      | 0      | 0      | 0      | 0      | 0      | 0      |
| 0      | 0      | 0      | 0      | 0      | 0      | 0      | 0      | 0      |
| 0      | 0      | 0      | 0      | 0      | 0      | 0      | 0      | 0      |
| 0      | 0      | 0      | 0      | 0      | 0      | 0      | 0      | 0      |
| 0      | 0      | 0      | 0      | 0      | 0      | 0      | 0      | 0      |
| 0      | 0      | 0      | 0      | 0      | 0      | 0      | 0      | 0      |
| 0.0041 | 0.0043 | 0.0041 | 0.0037 | 0.0037 | 0.0038 | 0.0036 | 0.0036 | 0.0036 |
| 0.0323 | 0.0318 | 0.0335 | 0.0337 | 0.0377 | 0.0382 | 0.0389 | 0.0389 | 0.04   |
| 0.0752 | 0.0739 | 0.0796 | 0.0849 | 0.094  | 0.1023 | 0.1037 | 0.106  | 0.1081 |
| 0.0347 | 0.0331 | 0.0344 | 0.0354 | 0.0367 | 0.0384 | 0.0389 | 0.0397 | 0.041  |
| 0.0105 | 0.0103 | 0.0108 | 0.0107 | 0.0109 | 0.011  | 0.0112 | 0.0118 | 0.012  |
| 0.0117 | 0.0112 | 0.0104 | 0.0095 | 0.0106 | 0.0104 | 0.011  | 0.0108 | 0.0106 |
| 0.0975 | 0.0905 | 0.0927 | 0.0924 | 0.095  | 0.0965 | 0.1032 | 0.1022 | 0.0997 |
| 0.1452 | 0.1377 | 0.1433 | 0.1414 | 0.1558 | 0.1567 | 0.1625 | 0.1595 | 0.1542 |
| 0.1446 | 0.1408 | 0.1361 | 0.1329 | 0.1378 | 0.143  | 0.1468 | 0.1457 | 0.1446 |
| 0.1611 | 0.1588 | 0.1618 | 0.1617 | 0.1655 | 0.1713 | 0.1774 | 0.178  | 0.1756 |
| 0.3799 | 0.3852 | 0.3657 | 0.3735 | 0.3624 | 0.3637 | 0.3789 | 0.3827 | 0.3849 |
| 0.6561 | 0.6533 | 0.655  | 0.6393 | 0.6011 | 0.6267 | 0.6345 | 0.6176 | 0.5906 |
| 0.4873 | 0.4898 | 0.4667 | 0.4836 | 0.4735 | 0.4882 | 0.4933 | 0.4488 | 0.4295 |
| 0.2079 | 0.2048 | 0.2072 | 0.2087 | 0.2111 | 0.2176 | 0.2224 | 0.2207 | 0.2194 |

|        |        |        |        |        |        |        |        |        |
|--------|--------|--------|--------|--------|--------|--------|--------|--------|
| 0.1864 | 0.1754 | 0.1787 | 0.1834 | 0.1912 | 0.1979 | 0.2026 | 0.2162 | 0.2296 |
| 0.2608 | 0.2576 | 0.2655 | 0.2735 | 0.2864 | 0.3171 | 0.323  | 0.3197 | 0.3263 |
| 0.2041 | 0.2035 | 0.2137 | 0.2215 | 0.2275 | 0.2346 | 0.2273 | 0.2231 | 0.238  |
| 0.0656 | 0.0656 | 0.0662 | 0.0668 | 0.0682 | 0.0712 | 0.0734 | 0.0735 | 0.0728 |
| 0.0201 | 0.0183 | 0.0195 | 0.0202 | 0.0214 | 0.0209 | 0.022  | 0.0234 | 0.0214 |
| 0.0089 | 0.0081 | 0.0075 | 0.0074 | 0.0076 | 0.0069 | 0.0073 | 0.0069 | 0.0056 |
| 0.0261 | 0.0268 | 0.0272 | 0.03   | 0.0278 | 0.0257 | 0.0265 | 0.0253 | 0.0266 |
| 0.0549 | 0.0563 | 0.0533 | 0.0527 | 0.051  | 0.0525 | 0.0513 | 0.052  | 0.0541 |
| 0.0222 | 0.0199 | 0.0189 | 0.0165 | 0.0182 | 0.0186 | 0.0187 | 0.0177 | 0.0166 |
| 0.0152 | 0.0142 | 0.0149 | 0.0134 | 0.0137 | 0.0128 | 0.0131 | 0.0119 | 0.011  |
| 0.0496 | 0.0492 | 0.0486 | 0.0481 | 0.048  | 0.051  | 0.0523 | 0.0519 | 0.0535 |
| 0      | 0      | 0      | 0      | 0      | 0      | 0      | 0      | 0      |
| 0      | 0      | 0      | 0      | 0      | 0      | 0      | 0      | 0      |
| 0.0359 | 0.0373 | 0.0367 | 0.0373 | 0.0348 | 0.0375 | 0.036  | 0.0354 | 0.0374 |
| 0.0759 | 0.0858 | 0.084  | 0.084  | 0.0767 | 0.0777 | 0.0822 | 0.0845 | 0.0893 |
| 0.0446 | 0.0444 | 0.044  | 0.0434 | 0.0387 | 0.0417 | 0.0397 | 0.0375 | 0.0396 |
| 0.0219 | 0.0236 | 0.023  | 0.023  | 0.0199 | 0.0213 | 0.0219 | 0.0218 | 0.0227 |
| 0.1367 | 0.1393 | 0.1456 | 0.1481 | 0.1448 | 0.1454 | 0.1433 | 0.1417 | 0.1397 |
| 0.3581 | 0.3686 | 0.3531 | 0.3683 | 0.3194 | 0.3437 | 0.3539 | 0.3485 | 0.3844 |
| 0.3304 | 0.3694 | 0.3417 | 0.3226 | 0.3051 | 0.311  | 0.3008 | 0.2901 | 0.2734 |
| 0.2016 | 0.2009 | 0.1939 | 0.1963 | 0.1944 | 0.2118 | 0.2027 | 0.2187 | 0.2113 |
| 0.2638 | 0.2828 | 0.2772 | 0.2687 | 0.2645 | 0.2635 | 0.2823 | 0.28   | 0.2628 |
| 0.449  | 0.4288 | 0.388  | 0.4141 | 0.4067 | 0.4312 | 0.4282 | 0.439  | 0.4325 |
| 0.3135 | 0.3256 | 0.3241 | 0.3181 | 0.2917 | 0.3213 | 0.2931 | 0.2846 | 0.3046 |
| 0.0635 | 0.0648 | 0.0655 | 0.0664 | 0.0654 | 0.0714 | 0.0736 | 0.0728 | 0.0726 |
| 0      | 0      | 0      | 0      | 0      | 0      | 0      | 0      | 0      |
| 0      | 0      | 0      | 0      | 0      | 0      | 0      | 0      | 0      |
| 0      | 0      | 0      | 0      | 0      | 0      | 0      | 0      | 0      |
| 0      | 0      | 0      | 0      | 0      | 0      | 0      | 0      | 0      |
| 0      | 0      | 0      | 0      | 0      | 0      | 0      | 0      | 0      |
| 0      | 0      | 0      | 0      | 0      | 0      | 0      | 0      | 0      |
| 0      | 0      | 0      | 0      | 0      | 0      | 0      | 0      | 0      |
| 0      | 0      | 0      | 0      | 0      | 0      | 0      | 0      | 0      |
| 0      | 0      | 0      | 0      | 0      | 0      | 0      | 0      | 0      |
| 0      | 0      | 0      | 0      | 0      | 0      | 0      | 0      | 0      |
| 0      | 0      | 0      | 0      | 0      | 0      | 0      | 0      | 0      |
| 0.01   | 0.0102 | 0.0105 | 0.0108 | 0.0115 | 0.012  | 0.0122 | 0.0119 | 0.0122 |
| 0.0062 | 0.0063 | 0.0064 | 0.0064 | 0.0062 | 0.0064 | 0.0068 | 0.0067 | 0.0067 |
| 0.0299 | 0.0303 | 0.032  | 0.031  | 0.0314 | 0.0332 | 0.0351 | 0.0355 | 0.0357 |
| 0      | 0      | 0      | 0      | 0      | 0      | 0      | 0      | 0      |
| 0.0076 | 0.0078 | 0.0076 | 0.0082 | 0.0081 | 0.0081 | 0.0086 | 0.0085 | 0.0084 |
| 0.0453 | 0.043  | 0.0421 | 0.0425 | 0.0431 | 0.0444 | 0.0463 | 0.0432 | 0.0418 |
| 0.1159 | 0.107  | 0.105  | 0.1078 | 0.1112 | 0.1104 | 0.1064 | 0.105  | 0.0975 |
| 0.1516 | 0.1389 | 0.1372 | 0.1448 | 0.1507 | 0.1405 | 0.1299 | 0.1243 | 0.1144 |







|        |        |        |        |        |        |        |        |        |
|--------|--------|--------|--------|--------|--------|--------|--------|--------|
| 0      | 0      | 0      | 0      | 0      | 0      | 0      | 0      | 0      |
| 0      | 0      | 0      | 0      | 0      | 0      | 0      | 0      | 0      |
| 0      | 0      | 0      | 0      | 0      | 0      | 0      | 0      | 0      |
| 0      | 0      | 0      | 0      | 0      | 0      | 0      | 0      | 0      |
| 0      | 0      | 0      | 0      | 0      | 0      | 0      | 0      | 0      |
| 0      | 0      | 0      | 0      | 0      | 0      | 0      | 0      | 0      |
| 0.0032 | 0.0032 | 0.0029 | 0.0032 | 0.0028 | 0.003  | 0.0031 | 0.0032 | 0.0034 |
| 0.0089 | 0.0084 | 0.0076 | 0.0072 | 0.007  | 0.0074 | 0.0073 | 0.0071 | 0.0068 |
| 0.0295 | 0.0287 | 0.0286 | 0.0289 | 0.0293 | 0.0292 | 0.0304 | 0.0297 | 0.0291 |
| 0.1236 | 0.1189 | 0.122  | 0.1244 | 0.1284 | 0.1336 | 0.1368 | 0.1316 | 0.1353 |
| 0.1437 | 0.1396 | 0.1445 | 0.1458 | 0.1505 | 0.1536 | 0.1565 | 0.1613 | 0.1561 |
| 0.1632 | 0.1569 | 0.1689 | 0.1654 | 0.1725 | 0.1806 | 0.1872 | 0.1881 | 0.1878 |
| 0.4695 | 0.4453 | 0.4273 | 0.413  | 0.4053 | 0.4393 | 0.4348 | 0.4202 | 0.3997 |
| 0.4341 | 0.424  | 0.3938 | 0.4006 | 0.3884 | 0.385  | 0.3863 | 0.3816 | 0.3908 |
| 0.1774 | 0.1731 | 0.172  | 0.1639 | 0.1613 | 0.1571 | 0.1626 | 0.159  | 0.151  |
| 0.165  | 0.1516 | 0.1546 | 0.1531 | 0.1581 | 0.1594 | 0.1604 | 0.1646 | 0.1573 |
| 0.1762 | 0.1658 | 0.1691 | 0.1702 | 0.1765 | 0.178  | 0.1804 | 0.1775 | 0.1785 |
| 0.204  | 0.197  | 0.1998 | 0.2012 | 0.2023 | 0.2092 | 0.2162 | 0.2158 | 0.213  |
| 0.2084 | 0.2037 | 0.2023 | 0.204  | 0.2081 | 0.2113 | 0.2125 | 0.2099 | 0.2071 |
| 0.1521 | 0.1438 | 0.144  | 0.1393 | 0.1469 | 0.1456 | 0.1485 | 0.1482 | 0.1403 |
| 0.1974 | 0.1882 | 0.1816 | 0.1677 | 0.1799 | 0.172  | 0.1652 | 0.1529 | 0.1371 |
| 0.2185 | 0.1938 | 0.1833 | 0.1908 | 0.1974 | 0.2042 | 0.2008 | 0.1759 | 0.1509 |
| 0.2838 | 0.2659 | 0.2372 | 0.2315 | 0.2516 | 0.2257 | 0.2313 | 0.2357 | 0.2019 |
| 0.2644 | 0.2549 | 0.2294 | 0.21   | 0.2096 | 0.1965 | 0.2058 | 0.1885 | 0.1735 |
| 0.2487 | 0.2412 | 0.222  | 0.2152 | 0.2181 | 0.2172 | 0.2114 | 0.2089 | 0.204  |
| 0.1567 | 0.1515 | 0.1477 | 0.1407 | 0.1309 | 0.1164 | 0.1144 | 0.1151 | 0.1082 |
| 0.1431 | 0.1346 | 0.1319 | 0.1282 | 0.1375 | 0.1375 | 0.1469 | 0.1423 | 0.1378 |
| 0.1724 | 0.1659 | 0.1623 | 0.1608 | 0.1632 | 0.1641 | 0.1633 | 0.1624 | 0.1595 |
| 0.519  | 0.511  | 0.4485 | 0.4786 | 0.4312 | 0.4213 | 0.4145 | 0.398  | 0.4069 |
| 0.5422 | 0.5304 | 0.5161 | 0.5115 | 0.5015 | 0.5133 | 0.5008 | 0.4734 | 0.4508 |
| 0.2621 | 0.2249 | 0.224  | 0.2074 | 0.1963 | 0.1929 | 0.1797 | 0.1746 | 0.1736 |
| 0.2162 | 0.197  | 0.2031 | 0.1893 | 0.1797 | 0.1675 | 0.1787 | 0.1789 | 0.1713 |
| 0.2303 | 0.2236 | 0.2192 | 0.2158 | 0.223  | 0.2254 | 0.2213 | 0.2156 | 0.2049 |
| 0.137  | 0.1328 | 0.1343 | 0.1421 | 0.1638 | 0.1707 | 0.1824 | 0.1798 | 0.1781 |
| 0.1301 | 0.1277 | 0.1336 | 0.1364 | 0.1441 | 0.1503 | 0.162  | 0.1558 | 0.1628 |
| 0.0494 | 0.0487 | 0.0492 | 0.0491 | 0.0495 | 0.0511 | 0.0523 | 0.0523 | 0.0523 |
| 0.1229 | 0.1234 | 0.1255 | 0.1246 | 0.1136 | 0.1233 | 0.1201 | 0.1156 | 0.1133 |
| 0.0037 | 0.0035 | 0.0031 | 0.0029 | 0.0027 | 0.0029 | 0.003  | 0.0031 | 0.0031 |
| 0.0113 | 0.0122 | 0.0124 | 0.0129 | 0.0127 | 0.0134 | 0.0128 | 0.012  | 0.0118 |
| 0.1241 | 0.1306 | 0.1201 | 0.1313 | 0.116  | 0.1358 | 0.1394 | 0.1306 | 0.1307 |
| 0.2349 | 0.2413 | 0.2098 | 0.2176 | 0.202  | 0.2079 | 0.2188 | 0.231  | 0.2333 |
| 0.1737 | 0.1687 | 0.1558 | 0.1501 | 0.128  | 0.137  | 0.1358 | 0.1419 | 0.1354 |
| 0.1249 | 0.1226 | 0.1144 | 0.1114 | 0.1102 | 0.1056 | 0.0986 | 0.1005 | 0.1036 |
| 0.0169 | 0.0167 | 0.0172 | 0.0189 | 0.017  | 0.0177 | 0.0182 | 0.0175 | 0.0167 |

|        |        |        |        |        |        |        |        |        |   |
|--------|--------|--------|--------|--------|--------|--------|--------|--------|---|
| 0      | 0      | 0      | 0      | 0      | 0      | 0      | 0      | 0      | 0 |
| 0      | 0      | 0      | 0      | 0      | 0      | 0      | 0      | 0      | 0 |
| 0      | 0      | 0      | 0      | 0      | 0      | 0      | 0      | 0      | 0 |
| 0      | 0      | 0      | 0      | 0      | 0      | 0      | 0      | 0      | 0 |
| 0      | 0      | 0      | 0      | 0      | 0      | 0      | 0      | 0      | 0 |
| 0      | 0      | 0      | 0      | 0      | 0      | 0      | 0      | 0      | 0 |
| 0      | 0      | 0      | 0      | 0      | 0      | 0      | 0      | 0      | 0 |
| 0      | 0      | 0      | 0      | 0      | 0      | 0      | 0      | 0      | 0 |
| 0      | 0      | 0      | 0      | 0      | 0      | 0      | 0      | 0      | 0 |
| 0      | 0      | 0      | 0      | 0      | 0      | 0      | 0      | 0      | 0 |
| 0.0082 | 0.0079 | 0.0081 | 0.0083 | 0.0086 | 0.0092 | 0.0097 | 0.0098 | 0.0105 |   |
| 0.0016 | 0.0014 | 0.0013 | 0.0013 | 0.0012 | 0.0011 | 0.001  | 0.0012 | 0.0011 |   |
| 0.0046 | 0.0043 | 0.0039 | 0.0039 | 0.0035 | 0.0036 | 0.0035 | 0.0037 | 0.0035 |   |
| 0.0151 | 0.015  | 0.0155 | 0.0159 | 0.0155 | 0.0161 | 0.0165 | 0.0163 | 0.0166 |   |
| 0.0319 | 0.0315 | 0.0318 | 0.032  | 0.0322 | 0.0331 | 0.0338 | 0.033  | 0.0325 |   |
| 0.1376 | 0.1306 | 0.134  | 0.1343 | 0.137  | 0.1429 | 0.1466 | 0.1479 | 0.1489 |   |
| 0.1441 | 0.1405 | 0.143  | 0.1456 | 0.1489 | 0.1566 | 0.1625 | 0.1606 | 0.159  |   |
| 0.1823 | 0.1814 | 0.1874 | 0.19   | 0.1983 | 0.2025 | 0.2002 | 0.2038 | 0.2089 |   |
| 0.2062 | 0.2009 | 0.2062 | 0.2032 | 0.2012 | 0.205  | 0.2055 | 0.2034 | 0.2029 |   |
| 0.2013 | 0.2041 | 0.2049 | 0.1905 | 0.1945 | 0.1987 | 0.2009 | 0.1994 | 0.1947 |   |
| 0.2057 | 0.1929 | 0.198  | 0.1862 | 0.1823 | 0.1768 | 0.1914 | 0.1858 | 0.1779 |   |
| 0.1828 | 0.1659 | 0.1608 | 0.1524 | 0.1588 | 0.157  | 0.1612 | 0.164  | 0.1582 |   |
| 0.1608 | 0.1534 | 0.1534 | 0.1529 | 0.1582 | 0.1658 | 0.1741 | 0.1795 | 0.1727 |   |
| 0.1297 | 0.1237 | 0.133  | 0.1354 | 0.1377 | 0.1408 | 0.1486 | 0.1512 | 0.1562 |   |
| 0.1258 | 0.1222 | 0.1257 | 0.1296 | 0.1346 | 0.1374 | 0.1386 | 0.1413 | 0.1386 |   |
| 0.1713 | 0.1682 | 0.171  | 0.1756 | 0.182  | 0.1918 | 0.1965 | 0.1951 | 0.1942 |   |
| 0.1365 | 0.1291 | 0.1302 | 0.1315 | 0.133  | 0.1345 | 0.1399 | 0.1422 | 0.14   |   |
| 0.1545 | 0.1352 | 0.1333 | 0.1167 | 0.1239 | 0.1212 | 0.1288 | 0.1266 | 0.1092 |   |
| 0.1603 | 0.1378 | 0.1214 | 0.1058 | 0.1187 | 0.1107 | 0.1132 | 0.1194 | 0.1092 |   |
| 0.2009 | 0.1975 | 0.1801 | 0.156  | 0.1635 | 0.1393 | 0.1416 | 0.1485 | 0.1079 |   |
| 0.2518 | 0.2247 | 0.22   | 0.215  | 0.2238 | 0.2171 | 0.2204 | 0.2152 | 0.2224 |   |
| 0.2026 | 0.202  | 0.2084 | 0.1998 | 0.1898 | 0.1897 | 0.1898 | 0.1838 | 0.1839 |   |
| 0.2083 | 0.1999 | 0.1983 | 0.1986 | 0.1972 | 0.2012 | 0.2057 | 0.2034 | 0.1996 |   |
| 0.1807 | 0.1743 | 0.1796 | 0.1739 | 0.173  | 0.1623 | 0.1643 | 0.159  | 0.1383 |   |
| 0.2281 | 0.2191 | 0.2163 | 0.2028 | 0.1964 | 0.197  | 0.2029 | 0.1897 | 0.1875 |   |
| 0.274  | 0.2674 | 0.2753 | 0.2652 | 0.251  | 0.2531 | 0.26   | 0.2566 | 0.2228 |   |
| 0.2708 | 0.2727 | 0.263  | 0.2661 | 0.2667 | 0.2745 | 0.285  | 0.2843 | 0.2745 |   |
| 0.3264 | 0.3201 | 0.2833 | 0.2721 | 0.2782 | 0.2861 | 0.3003 | 0.2861 | 0.2783 |   |
| 0.2807 | 0.2655 | 0.2356 | 0.2327 | 0.2398 | 0.2302 | 0.2281 | 0.2269 | 0.2151 |   |
| 0.1529 | 0.1483 | 0.1482 | 0.1478 | 0.1552 | 0.1606 | 0.1674 | 0.1672 | 0.1721 |   |
| 0.2362 | 0.2264 | 0.2318 | 0.2366 | 0.2463 | 0.255  | 0.2674 | 0.2719 | 0.2738 |   |
| 0.1563 | 0.1576 | 0.1627 | 0.1564 | 0.1633 | 0.1719 | 0.1756 | 0.1765 | 0.1821 |   |
| 0.1207 | 0.1184 | 0.1228 | 0.12   | 0.1184 | 0.1259 | 0.1302 | 0.1323 | 0.1379 |   |
| 0.0189 | 0.0202 | 0.0204 | 0.0229 | 0.0248 | 0.0271 | 0.0282 | 0.0274 | 0.0277 |   |

|        |        |        |        |        |        |        |        |        |
|--------|--------|--------|--------|--------|--------|--------|--------|--------|
| 0.0173 | 0.0176 | 0.0158 | 0.0152 | 0.0136 | 0.0137 | 0.0141 | 0.014  | 0.0142 |
| 0.0875 | 0.0956 | 0.0949 | 0.0973 | 0.0969 | 0.1008 | 0.0989 | 0.0954 | 0.0908 |
| 0.0707 | 0.07   | 0.069  | 0.0625 | 0.0602 | 0.0623 | 0.0661 | 0.0643 | 0.0686 |
| 0.0531 | 0.0554 | 0.0551 | 0.0577 | 0.0529 | 0.055  | 0.0527 | 0.0524 | 0.0536 |
| 0.0424 | 0.0475 | 0.0442 | 0.0426 | 0.0388 | 0.0373 | 0.0368 | 0.0338 | 0.0334 |
| 0      | 0      | 0      | 0      | 0      | 0      | 0      | 0      | 0      |
| 0      | 0      | 0      | 0      | 0      | 0      | 0      | 0      | 0      |
| 0      | 0      | 0      | 0      | 0      | 0      | 0      | 0      | 0      |
| 0      | 0      | 0      | 0      | 0      | 0      | 0      | 0      | 0      |
| 0      | 0      | 0      | 0      | 0      | 0      | 0      | 0      | 0      |
| 0      | 0      | 0      | 0      | 0      | 0      | 0      | 0      | 0      |
| 0      | 0      | 0      | 0      | 0      | 0      | 0      | 0      | 0      |
| 0      | 0      | 0      | 0      | 0      | 0      | 0      | 0      | 0      |
| 0      | 0      | 0      | 0      | 0      | 0      | 0      | 0      | 0      |
| 0      | 0      | 0      | 0      | 0      | 0      | 0      | 0      | 0      |
| 0      | 0      | 0      | 0      | 0      | 0      | 0      | 0      | 0      |
| 0.0166 | 0.0153 | 0.0141 | 0.0141 | 0.0141 | 0.0149 | 0.0144 | 0.0143 | 0.0139 |
| 0.0269 | 0.0273 | 0.0271 | 0.0273 | 0.0261 | 0.0271 | 0.0273 | 0.0274 | 0.0277 |
| 0.0185 | 0.0186 | 0.0174 | 0.0175 | 0.0161 | 0.0166 | 0.0153 | 0.0145 | 0.0135 |
| 0.0037 | 0.0036 | 0.0037 | 0.0035 | 0.0039 | 0.004  | 0.0041 | 0.0041 | 0.0041 |
| 0.0314 | 0.029  | 0.0315 | 0.0322 | 0.033  | 0.0339 | 0.035  | 0.0356 | 0.0352 |
| 0.1624 | 0.158  | 0.1609 | 0.1633 | 0.1651 | 0.1723 | 0.1785 | 0.1789 | 0.178  |
| 0.1644 | 0.1615 | 0.1638 | 0.1636 | 0.1684 | 0.1721 | 0.1797 | 0.1784 | 0.1776 |
| 0.1538 | 0.1489 | 0.1539 | 0.1542 | 0.158  | 0.1573 | 0.1624 | 0.1616 | 0.1546 |
| 0.1725 | 0.1561 | 0.1474 | 0.1436 | 0.1526 | 0.1465 | 0.1552 | 0.156  | 0.1418 |
| 0.1778 | 0.1633 | 0.1633 | 0.1705 | 0.1701 | 0.1718 | 0.1714 | 0.1566 | 0.1429 |
| 0.2142 | 0.1995 | 0.1943 | 0.1901 | 0.1899 | 0.1764 | 0.1835 | 0.1683 | 0.1538 |
| 0.1695 | 0.1569 | 0.1526 | 0.1498 | 0.1561 | 0.1526 | 0.1621 | 0.1643 | 0.1529 |
| 0.1663 | 0.1563 | 0.1593 | 0.1633 | 0.1724 | 0.1724 | 0.1816 | 0.1801 | 0.1826 |
| 0.2531 | 0.2496 | 0.2435 | 0.2461 | 0.2496 | 0.2524 | 0.2568 | 0.2538 | 0.2533 |
| 0.2278 | 0.2208 | 0.2143 | 0.2111 | 0.2016 | 0.205  | 0.2093 | 0.213  | 0.2124 |
| 0.1119 | 0.1074 | 0.1096 | 0.1105 | 0.113  | 0.117  | 0.1165 | 0.1116 | 0.1082 |
| 0.1539 | 0.1423 | 0.141  | 0.1378 | 0.1513 | 0.1567 | 0.1636 | 0.1637 | 0.1622 |
| 0.1434 | 0.1307 | 0.1222 | 0.1127 | 0.1173 | 0.1247 | 0.1326 | 0.1287 | 0.1139 |
| 0.1675 | 0.1631 | 0.1627 | 0.1567 | 0.1679 | 0.1686 | 0.1669 | 0.1588 | 0.1444 |
| 0.1848 | 0.1757 | 0.1598 | 0.1582 | 0.1739 | 0.142  | 0.1547 | 0.164  | 0.1432 |
| 0.2047 | 0.1806 | 0.1766 | 0.1834 | 0.2064 | 0.1976 | 0.2185 | 0.2143 | 0.2087 |
| 0.1894 | 0.1771 | 0.1725 | 0.1636 | 0.165  | 0.162  | 0.1646 | 0.156  | 0.1399 |
| 0.1732 | 0.1577 | 0.1437 | 0.1477 | 0.1508 | 0.1493 | 0.1438 | 0.1459 | 0.1349 |
| 0.2042 | 0.1936 | 0.1885 | 0.1768 | 0.1761 | 0.1799 | 0.1806 | 0.1704 | 0.1484 |
| 0.1765 | 0.1473 | 0.1381 | 0.1348 | 0.1442 | 0.1252 | 0.1296 | 0.0902 | 0.0884 |
| 0.1307 | 0.1149 | 0.1068 | 0.101  | 0.0951 | 0.1134 | 0.1197 | 0.0978 | 0.0875 |
| 0.2139 | 0.2094 | 0.2097 | 0.2069 | 0.2074 | 0.2238 | 0.2275 | 0.2069 | 0.1897 |
| 0.2783 | 0.2609 | 0.2438 | 0.2428 | 0.2248 | 0.2277 | 0.2393 | 0.2338 | 0.22   |

|        |        |        |        |        |        |        |        |        |
|--------|--------|--------|--------|--------|--------|--------|--------|--------|
| 0.1678 | 0.1444 | 0.1638 | 0.1391 | 0.1361 | 0.1245 | 0.1418 | 0.1443 | 0.1229 |
| 0.1404 | 0.1274 | 0.1329 | 0.1253 | 0.1239 | 0.1201 | 0.1285 | 0.1276 | 0.1105 |
| 0.1596 | 0.1543 | 0.1537 | 0.1523 | 0.1617 | 0.1589 | 0.1692 | 0.1632 | 0.1517 |
| 0.1762 | 0.1669 | 0.1674 | 0.1645 | 0.1735 | 0.172  | 0.1814 | 0.182  | 0.1721 |
| 0.1437 | 0.1359 | 0.1348 | 0.1319 | 0.1392 | 0.1381 | 0.1417 | 0.1406 | 0.1376 |
| 0.0382 | 0.0384 | 0.0409 | 0.0403 | 0.0407 | 0.0431 | 0.0432 | 0.0445 | 0.0449 |
| 0.0854 | 0.0838 | 0.0846 | 0.0878 | 0.0851 | 0.0921 | 0.0938 | 0.094  | 0.099  |
| 0.1331 | 0.1298 | 0.1319 | 0.1385 | 0.1285 | 0.1269 | 0.1278 | 0.1264 | 0.1273 |
| 0.0824 | 0.0816 | 0.0848 | 0.0861 | 0.0833 | 0.0866 | 0.089  | 0.0789 | 0.0805 |
| 0.027  | 0.0281 | 0.0288 | 0.0278 | 0.0249 | 0.0256 | 0.0247 | 0.0227 | 0.023  |
| 0.0127 | 0.0119 | 0.0121 | 0.0114 | 0.0113 | 0.0102 | 0.0113 | 0.0105 | 0.0097 |
| 0.0148 | 0.0157 | 0.0155 | 0.0145 | 0.0134 | 0.0141 | 0.0131 | 0.0132 | 0.014  |
| 0.0034 | 0.0036 | 0.0033 | 0.0032 | 0.003  | 0.0033 | 0.0033 | 0.0031 | 0.0031 |
| 0.0036 | 0.0038 | 0.0035 | 0.0033 | 0.0031 | 0.0032 | 0.0032 | 0.0029 | 0.003  |
| 0      | 0      | 0      | 0      | 0      | 0      | 0      | 0      | 0      |
| 0      | 0      | 0      | 0      | 0      | 0      | 0      | 0      | 0      |
| 0      | 0      | 0      | 0      | 0      | 0      | 0      | 0      | 0      |
| 0      | 0      | 0      | 0      | 0      | 0      | 0      | 0      | 0      |
| 0      | 0      | 0      | 0      | 0      | 0      | 0      | 0      | 0      |
| 0      | 0      | 0      | 0      | 0      | 0      | 0      | 0      | 0      |
| 0      | 0      | 0      | 0      | 0      | 0      | 0      | 0      | 0      |
| 0      | 0      | 0      | 0      | 0      | 0      | 0      | 0      | 0      |
| 0.0236 | 0.0237 | 0.0232 | 0.0251 | 0.0239 | 0.0258 | 0.0246 | 0.0241 | 0.0228 |
| 0.0124 | 0.0135 | 0.013  | 0.013  | 0.012  | 0.0125 | 0.0132 | 0.0126 | 0.0125 |
| 0.0234 | 0.0235 | 0.0232 | 0.0252 | 0.0248 | 0.0234 | 0.023  | 0.024  | 0.0236 |
| 0.0592 | 0.0585 | 0.0593 | 0.0601 | 0.0594 | 0.0619 | 0.0628 | 0.0614 | 0.0608 |
| 0.1283 | 0.1184 | 0.1222 | 0.1248 | 0.1299 | 0.1293 | 0.1362 | 0.1387 | 0.1382 |
| 0.1556 | 0.1464 | 0.1528 | 0.1481 | 0.1551 | 0.1589 | 0.1656 | 0.163  | 0.1585 |
| 0.1694 | 0.1586 | 0.1544 | 0.1464 | 0.1556 | 0.1534 | 0.1537 | 0.1598 | 0.1568 |
| 0.1805 | 0.1633 | 0.1707 | 0.1678 | 0.1731 | 0.1649 | 0.1665 | 0.1693 | 0.151  |
| 0.1543 | 0.1407 | 0.1383 | 0.1228 | 0.1262 | 0.1275 | 0.1301 | 0.1258 | 0.1027 |
| 0.2516 | 0.2312 | 0.2299 | 0.2282 | 0.2247 | 0.2306 | 0.2229 | 0.2192 | 0.1833 |
| 0.1926 | 0.186  | 0.1763 | 0.1733 | 0.1656 | 0.1506 | 0.1444 | 0.1485 | 0.1247 |
| 0.173  | 0.163  | 0.1619 | 0.1501 | 0.1562 | 0.1538 | 0.1619 | 0.1632 | 0.1498 |
| 0.1396 | 0.1336 | 0.1335 | 0.1339 | 0.1428 | 0.1446 | 0.1491 | 0.1472 | 0.1419 |
| 0.2791 | 0.2611 | 0.2405 | 0.2377 | 0.2461 | 0.25   | 0.2615 | 0.2475 | 0.2514 |
| 0.4591 | 0.464  | 0.4526 | 0.4671 | 0.4039 | 0.4135 | 0.4068 | 0.3846 | 0.3772 |
| 0.4039 | 0.4209 | 0.4011 | 0.3966 | 0.3929 | 0.399  | 0.3951 | 0.371  | 0.3429 |
| 0.24   | 0.2382 | 0.2339 | 0.2351 | 0.2301 | 0.2412 | 0.2391 | 0.2349 | 0.2331 |
| 0.1559 | 0.1418 | 0.1355 | 0.1346 | 0.1475 | 0.1409 | 0.1421 | 0.1397 | 0.1312 |
| 0.1604 | 0.1265 | 0.1191 | 0.1156 | 0.1108 | 0.1003 | 0.1103 | 0.1005 | 0.0808 |
| 0.245  | 0.2256 | 0.2128 | 0.196  | 0.1969 | 0.1837 | 0.196  | 0.2122 | 0.1984 |
| 0.2049 | 0.1885 | 0.1977 | 0.1978 | 0.2019 | 0.1978 | 0.186  | 0.1861 | 0.1315 |
| 0.1582 | 0.1459 | 0.1434 | 0.1187 | 0.1089 | 0.0846 | 0.0996 | 0.1076 | 0.0858 |

|        |        |        |        |        |        |        |        |        |
|--------|--------|--------|--------|--------|--------|--------|--------|--------|
| 0.1998 | 0.1885 | 0.1743 | 0.1725 | 0.1721 | 0.1574 | 0.1619 | 0.1462 | 0.1122 |
| 0.1699 | 0.1511 | 0.1657 | 0.1456 | 0.1599 | 0.1418 | 0.1559 | 0.1432 | 0.1259 |
| 0.1341 | 0.1129 | 0.1089 | 0.0972 | 0.0886 | 0.0972 | 0.1004 | 0.1134 | 0.1022 |
| 0.1622 | 0.1426 | 0.1518 | 0.1467 | 0.1625 | 0.1464 | 0.1467 | 0.1412 | 0.1173 |
| 0.1914 | 0.1742 | 0.1564 | 0.1463 | 0.1429 | 0.1467 | 0.1478 | 0.1415 | 0.1406 |
| 0.2278 | 0.2142 | 0.2073 | 0.1808 | 0.1812 | 0.1622 | 0.1753 | 0.1724 | 0.1573 |
| 0.1478 | 0.1243 | 0.1167 | 0.1022 | 0.1069 | 0.1081 | 0.1336 | 0.1266 | 0.1183 |
| 0.1761 | 0.1595 | 0.1445 | 0.1382 | 0.142  | 0.132  | 0.1375 | 0.1256 | 0.1275 |
| 0.219  | 0.2106 | 0.1912 | 0.2075 | 0.2052 | 0.1875 | 0.1872 | 0.1881 | 0.1781 |
| 0.2632 | 0.2581 | 0.2302 | 0.2167 | 0.219  | 0.1848 | 0.1887 | 0.1774 | 0.1674 |
| 0.1572 | 0.1376 | 0.1326 | 0.1362 | 0.1392 | 0.1392 | 0.1476 | 0.1419 | 0.1317 |
| 0.1433 | 0.1357 | 0.1367 | 0.1332 | 0.1434 | 0.143  | 0.1526 | 0.1543 | 0.1465 |
| 0.1777 | 0.1699 | 0.1783 | 0.1744 | 0.1852 | 0.1798 | 0.1868 | 0.1937 | 0.1923 |
| 0.1264 | 0.131  | 0.1365 | 0.1397 | 0.1408 | 0.1486 | 0.1526 | 0.1532 | 0.1614 |
| 0.0732 | 0.072  | 0.073  | 0.0727 | 0.0727 | 0.0756 | 0.0765 | 0.0766 | 0.0778 |
| 0.0315 | 0.0302 | 0.0281 | 0.0275 | 0.0287 | 0.0297 | 0.0297 | 0.029  | 0.0295 |
| 0.0397 | 0.04   | 0.0407 | 0.0417 | 0.0426 | 0.0444 | 0.0445 | 0.0469 | 0.047  |
| 0.0362 | 0.0391 | 0.0376 | 0.0373 | 0.0361 | 0.038  | 0.0383 | 0.0374 | 0.0397 |
| 0.0037 | 0.0036 | 0.0033 | 0.0034 | 0.0031 | 0.0031 | 0.0031 | 0.0033 | 0.0033 |
| 0.003  | 0.0031 | 0.0032 | 0.0033 | 0.0031 | 0.0033 | 0.0033 | 0.0033 | 0.0033 |
| 0      | 0      | 0      | 0      | 0      | 0      | 0      | 0      | 0      |
| 0      | 0      | 0      | 0      | 0      | 0      | 0      | 0      | 0      |
| 0      | 0      | 0      | 0      | 0      | 0      | 0      | 0      | 0      |
| 0      | 0      | 0      | 0      | 0      | 0      | 0      | 0      | 0      |
| 0      | 0      | 0      | 0      | 0      | 0      | 0      | 0      | 0      |
| 0      | 0      | 0      | 0      | 0      | 0      | 0      | 0      | 0      |
| 0      | 0      | 0      | 0      | 0      | 0      | 0      | 0      | 0      |
| 0      | 0      | 0      | 0      | 0      | 0      | 0      | 0      | 0      |
| 0.0215 | 0.0234 | 0.0223 | 0.0221 | 0.021  | 0.0219 | 0.0212 | 0.0214 | 0.0213 |
| 0      | 0      | 0      | 0      | 0      | 0      | 0      | 0      | 0      |
| 0.0225 | 0.0229 | 0.0229 | 0.0228 | 0.0219 | 0.0213 | 0.0201 | 0.0203 | 0.0207 |
| 0.0851 | 0.0872 | 0.0888 | 0.089  | 0.0872 | 0.0913 | 0.0929 | 0.0926 | 0.0917 |
| 0.1838 | 0.1832 | 0.185  | 0.1869 | 0.1962 | 0.2023 | 0.2076 | 0.2058 | 0.2016 |
| 0.1517 | 0.1324 | 0.1348 | 0.135  | 0.1423 | 0.1426 | 0.1537 | 0.154  | 0.1503 |
| 0.1533 | 0.1273 | 0.1205 | 0.1272 | 0.138  | 0.1159 | 0.1244 | 0.1447 | 0.1361 |
| 0.2188 | 0.2024 | 0.1874 | 0.1822 | 0.1797 | 0.1803 | 0.1926 | 0.1738 | 0.1486 |
| 0.2138 | 0.2069 | 0.2008 | 0.1887 | 0.1976 | 0.1876 | 0.2009 | 0.197  | 0.1587 |
| 0.2194 | 0.224  | 0.2179 | 0.2031 | 0.2128 | 0.2095 | 0.2174 | 0.2149 | 0.2162 |
| 0.1879 | 0.1815 | 0.1794 | 0.177  | 0.1846 | 0.1591 | 0.1599 | 0.1389 | 0.1267 |
| 0.1798 | 0.1722 | 0.173  | 0.1675 | 0.1887 | 0.1672 | 0.1587 | 0.1533 | 0.1236 |
| 0.127  | 0.1138 | 0.1105 | 0.1006 | 0.1115 | 0.1121 | 0.1189 | 0.1143 | 0.1108 |
| 0.2193 | 0.2134 | 0.2069 | 0.2057 | 0.2002 | 0.1913 | 0.1915 | 0.1936 | 0.1764 |
| 0.5945 | 0.5718 | 0.5232 | 0.5191 | 0.4974 | 0.4993 | 0.5051 | 0.4961 | 0.4971 |
| 0.64   | 0.6408 | 0.6001 | 0.5898 | 0.5653 | 0.5687 | 0.5278 | 0.5494 | 0.5365 |

|        |        |        |        |        |        |        |        |        |
|--------|--------|--------|--------|--------|--------|--------|--------|--------|
| 0.2495 | 0.2343 | 0.2288 | 0.2377 | 0.2443 | 0.2409 | 0.2359 | 0.238  | 0.2365 |
| 0.1102 | 0.0943 | 0.0941 | 0.0871 | 0.1038 | 0.0818 | 0.0929 | 0.0952 | 0.0711 |
| 0.2058 | 0.1812 | 0.1546 | 0.1367 | 0.1309 | 0.129  | 0.1362 | 0.1326 | 0.1135 |
| 0.3466 | 0.3293 | 0.3205 | 0.3089 | 0.2912 | 0.2831 | 0.2737 | 0.2835 | 0.2623 |
| 0.2243 | 0.2028 | 0.1844 | 0.1707 | 0.1747 | 0.1749 | 0.171  | 0.174  | 0.1639 |
| 0.1612 | 0.1424 | 0.127  | 0.1202 | 0.1367 | 0.1285 | 0.143  | 0.1449 | 0.1069 |
| 0.2377 | 0.2335 | 0.2191 | 0.2029 | 0.1996 | 0.1795 | 0.1991 | 0.1867 | 0.1678 |
| 0.1735 | 0.1578 | 0.1483 | 0.1405 | 0.1423 | 0.1306 | 0.1222 | 0.1184 | 0.0979 |
| 0.191  | 0.1618 | 0.1496 | 0.1453 | 0.1439 | 0.1479 | 0.1697 | 0.1572 | 0.1298 |
| 0.1343 | 0.1175 | 0.1093 | 0.1204 | 0.1392 | 0.1235 | 0.1327 | 0.1328 | 0.1075 |
| 0.1924 | 0.1794 | 0.1823 | 0.1865 | 0.1945 | 0.1881 | 0.1862 | 0.1772 | 0.157  |
| 0.1561 | 0.1386 | 0.1349 | 0.1291 | 0.13   | 0.1248 | 0.1339 | 0.1327 | 0.1207 |
| 0.1543 | 0.1426 | 0.1389 | 0.1319 | 0.1355 | 0.1352 | 0.1444 | 0.1488 | 0.1411 |
| 0.1978 | 0.1864 | 0.1788 | 0.1701 | 0.1747 | 0.1738 | 0.1729 | 0.1654 | 0.1624 |
| 0.2946 | 0.2592 | 0.2459 | 0.242  | 0.2551 | 0.2771 | 0.2649 | 0.2508 | 0.244  |
| 0.3249 | 0.3227 | 0.3081 | 0.2791 | 0.276  | 0.2593 | 0.2727 | 0.279  | 0.2667 |
| 0.226  | 0.1994 | 0.1972 | 0.1698 | 0.1598 | 0.1472 | 0.1668 | 0.1626 | 0.1557 |
| 0.1557 | 0.142  | 0.1244 | 0.1155 | 0.1267 | 0.1226 | 0.116  | 0.1061 | 0.0931 |
| 0.1518 | 0.1457 | 0.1509 | 0.1504 | 0.1519 | 0.1519 | 0.1617 | 0.1605 | 0.1523 |
| 0.1624 | 0.1595 | 0.1584 | 0.1585 | 0.1658 | 0.1776 | 0.1817 | 0.1787 | 0.1956 |
| 0.1529 | 0.1535 | 0.1657 | 0.1763 | 0.1894 | 0.1911 | 0.203  | 0.1991 | 0.1978 |
| 0.0454 | 0.0457 | 0.0454 | 0.0456 | 0.0465 | 0.0477 | 0.0498 | 0.0493 | 0.0504 |
| 0.0078 | 0.0083 | 0.0075 | 0.0076 | 0.0073 | 0.0074 | 0.0071 | 0.0073 | 0.0079 |
| 0.0143 | 0.0145 | 0.0144 | 0.0128 | 0.0118 | 0.0123 | 0.012  | 0.0115 | 0.011  |
| 0.0035 | 0.0034 | 0.0031 | 0.0032 | 0.003  | 0.0033 | 0.0033 | 0.0033 | 0.003  |
| 0.0032 | 0.0034 | 0.0033 | 0.0034 | 0.0031 | 0.003  | 0.003  | 0.0029 | 0.0033 |
| 0      | 0      | 0      | 0      | 0      | 0      | 0      | 0      | 0      |
| 0      | 0      | 0      | 0      | 0      | 0      | 0      | 0      | 0      |
| 0      | 0      | 0      | 0      | 0      | 0      | 0      | 0      | 0      |
| 0      | 0      | 0      | 0      | 0      | 0      | 0      | 0      | 0      |
| 0      | 0      | 0      | 0      | 0      | 0      | 0      | 0      | 0      |
| 0      | 0      | 0      | 0      | 0      | 0      | 0      | 0      | 0      |
| 0      | 0      | 0      | 0      | 0      | 0      | 0      | 0      | 0      |
| 0      | 0      | 0      | 0      | 0      | 0      | 0      | 0      | 0      |
| 0      | 0      | 0      | 0      | 0      | 0      | 0      | 0      | 0      |
| 0.0051 | 0.0043 | 0.0043 | 0.0044 | 0.0045 | 0.0041 | 0.0043 | 0.0041 | 0.0038 |
| 0.0194 | 0.0183 | 0.0188 | 0.0187 | 0.0186 | 0.0181 | 0.0179 | 0.0183 | 0.0175 |
| 0.1052 | 0.0994 | 0.0993 | 0.0991 | 0.1001 | 0.0963 | 0.0975 | 0.0959 | 0.0893 |
| 0.1824 | 0.1741 | 0.173  | 0.1731 | 0.1773 | 0.1774 | 0.18   | 0.1817 | 0.1764 |
| 0.1409 | 0.1259 | 0.1266 | 0.1044 | 0.1094 | 0.0969 | 0.1032 | 0.0905 | 0.0851 |
| 0.2225 | 0.2019 | 0.191  | 0.1671 | 0.189  | 0.1716 | 0.159  | 0.154  | 0.1306 |
| 0.219  | 0.2124 | 0.1976 | 0.1675 | 0.1695 | 0.1757 | 0.1702 | 0.1636 | 0.1431 |
| 0.2523 | 0.2316 | 0.2197 | 0.2124 | 0.2177 | 0.2199 | 0.2175 | 0.2145 | 0.1886 |
| 0.2081 | 0.2107 | 0.1972 | 0.1849 | 0.1742 | 0.1816 | 0.1955 | 0.1854 | 0.1673 |

|        |        |        |        |        |        |        |        |        |
|--------|--------|--------|--------|--------|--------|--------|--------|--------|
| 0.199  | 0.1926 | 0.18   | 0.1734 | 0.1675 | 0.1574 | 0.151  | 0.1377 | 0.1416 |
| 0.2035 | 0.1942 | 0.1803 | 0.1806 | 0.1979 | 0.1792 | 0.1695 | 0.1701 | 0.1357 |
| 0.1522 | 0.1402 | 0.149  | 0.1319 | 0.1323 | 0.1339 | 0.1407 | 0.1343 | 0.1224 |
| 0.1477 | 0.1465 | 0.1394 | 0.1381 | 0.1389 | 0.1372 | 0.1525 | 0.1483 | 0.1359 |
| 0.3168 | 0.3286 | 0.3183 | 0.3147 | 0.3232 | 0.3305 | 0.3376 | 0.3099 | 0.2977 |
| 0.343  | 0.3272 | 0.3271 | 0.3128 | 0.2836 | 0.2928 | 0.2952 | 0.2879 | 0.3131 |
| 0.1949 | 0.1843 | 0.1844 | 0.187  | 0.1905 | 0.1896 | 0.1821 | 0.1847 | 0.1898 |
| 0.1472 | 0.1256 | 0.1293 | 0.1128 | 0.1134 | 0.1131 | 0.0996 | 0.0936 | 0.0842 |
| 0.2472 | 0.2339 | 0.2279 | 0.2029 | 0.188  | 0.188  | 0.202  | 0.2004 | 0.1917 |
| 0.3718 | 0.3526 | 0.3301 | 0.3244 | 0.3037 | 0.3148 | 0.314  | 0.3339 | 0.3281 |
| 0.2317 | 0.2113 | 0.2141 | 0.2024 | 0.2005 | 0.1932 | 0.195  | 0.1679 | 0.1405 |
| 0.1728 | 0.1541 | 0.1437 | 0.147  | 0.1471 | 0.1302 | 0.1307 | 0.1249 | 0.0979 |
| 0.1848 | 0.1835 | 0.1756 | 0.1606 | 0.1504 | 0.1631 | 0.1591 | 0.1523 | 0.1464 |
| 0.2515 | 0.231  | 0.2229 | 0.2294 | 0.2211 | 0.2172 | 0.217  | 0.2169 | 0.1928 |
| 0.2395 | 0.2075 | 0.2038 | 0.1878 | 0.188  | 0.1867 | 0.2019 | 0.1922 | 0.1763 |
| 0.1983 | 0.1909 | 0.1937 | 0.1981 | 0.1957 | 0.1816 | 0.1753 | 0.181  | 0.1546 |
| 0.1853 | 0.1592 | 0.1344 | 0.1394 | 0.1307 | 0.1324 | 0.1419 | 0.1371 | 0.1183 |
| 0.1513 | 0.141  | 0.1402 | 0.1387 | 0.1432 | 0.142  | 0.1435 | 0.135  | 0.1244 |
| 0.1519 | 0.1468 | 0.1507 | 0.1527 | 0.1563 | 0.1599 | 0.1676 | 0.1677 | 0.1606 |
| 0.1858 | 0.1687 | 0.1672 | 0.1596 | 0.1666 | 0.1634 | 0.1672 | 0.1766 | 0.1739 |
| 0.2217 | 0.2036 | 0.19   | 0.2021 | 0.1844 | 0.1887 | 0.197  | 0.2    | 0.2012 |
| 0.3082 | 0.2916 | 0.2727 | 0.2776 | 0.2727 | 0.273  | 0.2889 | 0.2956 | 0.2578 |
| 0.1674 | 0.1537 | 0.1465 | 0.1511 | 0.1535 | 0.1526 | 0.1565 | 0.1404 | 0.1211 |
| 0.1214 | 0.1101 | 0.1075 | 0.1026 | 0.1109 | 0.1111 | 0.1223 | 0.1259 | 0.1226 |
| 0.1431 | 0.1325 | 0.1253 | 0.1274 | 0.1361 | 0.1382 | 0.1394 | 0.1263 | 0.1137 |
| 0.1911 | 0.1785 | 0.1811 | 0.1769 | 0.1794 | 0.1808 | 0.1929 | 0.1943 | 0.1804 |
| 0.1717 | 0.1657 | 0.1706 | 0.1713 | 0.1728 | 0.1842 | 0.1896 | 0.1902 | 0.1903 |
| 0.0298 | 0.0302 | 0.0305 | 0.0301 | 0.0301 | 0.0313 | 0.0323 | 0.0326 | 0.0335 |
| 0      | 0      | 0      | 0      | 0      | 0      | 0      | 0      | 0      |
| 0.011  | 0.0113 | 0.0118 | 0.0124 | 0.0129 | 0.013  | 0.0135 | 0.0138 | 0.0143 |
| 0.0036 | 0.0033 | 0.0031 | 0.0032 | 0.0031 | 0.0036 | 0.0033 | 0.0034 | 0.0033 |
| 0.0029 | 0.003  | 0.0029 | 0.003  | 0.0028 | 0.0033 | 0.0035 | 0.0036 | 0.0038 |
| 0      | 0      | 0      | 0      | 0      | 0      | 0      | 0      | 0      |
| 0      | 0      | 0      | 0      | 0      | 0      | 0      | 0      | 0      |
| 0      | 0      | 0      | 0      | 0      | 0      | 0      | 0      | 0      |
| 0      | 0      | 0      | 0      | 0      | 0      | 0      | 0      | 0      |
| 0      | 0      | 0      | 0      | 0      | 0      | 0      | 0      | 0      |
| 0      | 0      | 0      | 0      | 0      | 0      | 0      | 0      | 0      |
| 0      | 0      | 0      | 0      | 0      | 0      | 0      | 0      | 0      |
| 0      | 0      | 0      | 0      | 0      | 0      | 0      | 0      | 0      |
| 0.0044 | 0.0042 | 0.0044 | 0.0045 | 0.0047 | 0.005  | 0.0052 | 0.0051 | 0.0053 |
| 0.0209 | 0.021  | 0.02   | 0.0211 | 0.0223 | 0.022  | 0.0244 | 0.0239 | 0.0233 |
| 0.029  | 0.0254 | 0.0262 | 0.0258 | 0.0257 | 0.025  | 0.0246 | 0.0249 | 0.0235 |
| 0.1275 | 0.117  | 0.1166 | 0.1109 | 0.1214 | 0.1254 | 0.1252 | 0.12   | 0.1085 |





|        |        |        |        |        |        |        |        |        |
|--------|--------|--------|--------|--------|--------|--------|--------|--------|
| 0      | 0      | 0      | 0      | 0      | 0      | 0      | 0      | 0      |
| 0      | 0      | 0      | 0      | 0      | 0      | 0      | 0      | 0      |
| 0.0083 | 0.0077 | 0.0076 | 0.0073 | 0.0076 | 0.0075 | 0.0078 | 0.0077 | 0.0071 |
| 0.0325 | 0.0308 | 0.0299 | 0.0289 | 0.0266 | 0.0283 | 0.0293 | 0.0293 | 0.0307 |
| 0.0264 | 0.0256 | 0.0253 | 0.0252 | 0.0235 | 0.0238 | 0.0232 | 0.0222 | 0.021  |
| 0.1288 | 0.1225 | 0.1201 | 0.1194 | 0.1278 | 0.129  | 0.1373 | 0.1325 | 0.1227 |
| 0.2073 | 0.1979 | 0.1912 | 0.186  | 0.1775 | 0.1766 | 0.1707 | 0.1674 | 0.1783 |
| 0.2858 | 0.2415 | 0.2311 | 0.2098 | 0.215  | 0.221  | 0.2233 | 0.2169 | 0.2138 |
| 0.2267 | 0.2207 | 0.2238 | 0.2171 | 0.2076 | 0.1911 | 0.2017 | 0.1957 | 0.1811 |
| 0.1504 | 0.1388 | 0.1387 | 0.1308 | 0.134  | 0.1246 | 0.13   | 0.1252 | 0.1201 |
| 0.186  | 0.1617 | 0.1629 | 0.1622 | 0.1707 | 0.1748 | 0.1806 | 0.1687 | 0.1476 |
| 0.1533 | 0.1251 | 0.1382 | 0.1326 | 0.1338 | 0.1191 | 0.1229 | 0.1329 | 0.1169 |
| 0.1667 | 0.1333 | 0.1285 | 0.1311 | 0.1352 | 0.1366 | 0.1511 | 0.1494 | 0.1381 |
| 0.1735 | 0.1541 | 0.1606 | 0.1689 | 0.1609 | 0.1455 | 0.1634 | 0.1642 | 0.1492 |
| 0.2172 | 0.2042 | 0.1842 | 0.1646 | 0.1594 | 0.1432 | 0.1484 | 0.1431 | 0.1172 |
| 0.26   | 0.2586 | 0.2421 | 0.2277 | 0.2256 | 0.2189 | 0.2079 | 0.2037 | 0.2088 |
| 0.1028 | 0.09   | 0.084  | 0.0788 | 0.0922 | 0.0904 | 0.0934 | 0.0839 | 0.0818 |
| 0.1614 | 0.1531 | 0.1556 | 0.1562 | 0.1594 | 0.1625 | 0.1673 | 0.1628 | 0.1603 |
| 0.1563 | 0.1463 | 0.1416 | 0.1381 | 0.1488 | 0.1551 | 0.1617 | 0.1599 | 0.1475 |
| 0.1567 | 0.1321 | 0.1316 | 0.1285 | 0.1259 | 0.1304 | 0.142  | 0.1489 | 0.1302 |
| 0.1625 | 0.1435 | 0.1323 | 0.1225 | 0.1273 | 0.1312 | 0.1422 | 0.1382 | 0.1155 |
| 0.1216 | 0.1052 | 0.1062 | 0.1027 | 0.1031 | 0.0982 | 0.1253 | 0.1235 | 0.116  |
| 0.1336 | 0.1349 | 0.1108 | 0.1041 | 0.1029 | 0.096  | 0.1143 | 0.1059 | 0.0956 |
| 0.1472 | 0.1411 | 0.1315 | 0.1305 | 0.1336 | 0.1287 | 0.1348 | 0.1304 | 0.1171 |
| 0.1304 | 0.1244 | 0.1227 | 0.1285 | 0.1359 | 0.1368 | 0.1394 | 0.1391 | 0.1331 |
| 0.1813 | 0.1615 | 0.1551 | 0.1516 | 0.151  | 0.1457 | 0.15   | 0.1411 | 0.1212 |
| 0.1641 | 0.1406 | 0.1191 | 0.1202 | 0.1277 | 0.1221 | 0.1306 | 0.1372 | 0.1346 |
| 0.1394 | 0.1245 | 0.1318 | 0.1248 | 0.1235 | 0.1181 | 0.1244 | 0.1341 | 0.128  |
| 0.1549 | 0.15   | 0.1443 | 0.1328 | 0.1242 | 0.1168 | 0.1301 | 0.1244 | 0.0982 |
| 0.1565 | 0.15   | 0.1435 | 0.1362 | 0.1332 | 0.144  | 0.1406 | 0.1402 | 0.1301 |
| 0.147  | 0.1363 | 0.1274 | 0.1295 | 0.1369 | 0.1412 | 0.1393 | 0.1326 | 0.1203 |
| 0.1786 | 0.1577 | 0.1505 | 0.1411 | 0.1442 | 0.149  | 0.1518 | 0.1529 | 0.1395 |
| 0.1141 | 0.0981 | 0.0942 | 0.0969 | 0.1062 | 0.1022 | 0.1132 | 0.1048 | 0.0913 |
| 0.1377 | 0.1362 | 0.1183 | 0.107  | 0.1128 | 0.1115 | 0.1049 | 0.1122 | 0.0892 |
| 0.1758 | 0.1576 | 0.1531 | 0.1544 | 0.1559 | 0.1539 | 0.1548 | 0.1502 | 0.1391 |
| 0.1349 | 0.1233 | 0.1256 | 0.1274 | 0.1339 | 0.1328 | 0.1351 | 0.1289 | 0.11   |
| 0.1355 | 0.1391 | 0.127  | 0.1168 | 0.1256 | 0.1138 | 0.1115 | 0.0935 | 0.0843 |
| 0.2049 | 0.1721 | 0.1607 | 0.1523 | 0.1515 | 0.1559 | 0.1332 | 0.119  | 0.0988 |
| 0.166  | 0.1544 | 0.1413 | 0.1342 | 0.1453 | 0.141  | 0.1412 | 0.149  | 0.1387 |
| 0.1172 | 0.1114 | 0.1113 | 0.1103 | 0.1151 | 0.1182 | 0.1209 | 0.1186 | 0.1107 |
| 0.1394 | 0.1415 | 0.1281 | 0.1311 | 0.1314 | 0.136  | 0.1357 | 0.1435 | 0.1386 |
| 0.2116 | 0.2223 | 0.2187 | 0.2346 | 0.2143 | 0.2227 | 0.2091 | 0.2147 | 0.2384 |
| 0.0034 | 0.0035 | 0.0031 | 0.0031 | 0.0031 | 0.0034 | 0.0034 | 0.0031 | 0.003  |
| 0.0037 | 0.0037 | 0.0036 | 0.0036 | 0.0033 | 0.0034 | 0.0036 | 0.0034 | 0.0033 |

|        |        |        |        |        |        |        |        |        |   |
|--------|--------|--------|--------|--------|--------|--------|--------|--------|---|
| 0      | 0      | 0      | 0      | 0      | 0      | 0      | 0      | 0      | 0 |
| 0      | 0      | 0      | 0      | 0      | 0      | 0      | 0      | 0      | 0 |
| 0      | 0      | 0      | 0      | 0      | 0      | 0      | 0      | 0      | 0 |
| 0      | 0      | 0      | 0      | 0      | 0      | 0      | 0      | 0      | 0 |
| 0      | 0      | 0      | 0      | 0      | 0      | 0      | 0      | 0      | 0 |
| 0      | 0      | 0      | 0      | 0      | 0      | 0      | 0      | 0      | 0 |
| 0      | 0      | 0      | 0      | 0      | 0      | 0      | 0      | 0      | 0 |
| 0      | 0      | 0      | 0      | 0      | 0      | 0      | 0      | 0      | 0 |
| 0.0058 | 0.0058 | 0.0058 | 0.0056 | 0.0053 | 0.0049 | 0.0051 | 0.0049 | 0.0045 |   |
| 0.0275 | 0.0267 | 0.0254 | 0.028  | 0.0247 | 0.0282 | 0.0265 | 0.0271 | 0.0268 |   |
| 0.0332 | 0.0324 | 0.0329 | 0.0333 | 0.0337 | 0.0347 | 0.0358 | 0.0355 | 0.0352 |   |
| 0.1158 | 0.1102 | 0.1069 | 0.1052 | 0.107  | 0.1091 | 0.1096 | 0.1099 | 0.1055 |   |
| 0.2584 | 0.2472 | 0.2381 | 0.2291 | 0.2194 | 0.2095 | 0.2091 | 0.196  | 0.1962 |   |
| 0.275  | 0.2719 | 0.2507 | 0.245  | 0.2244 | 0.2551 | 0.2419 | 0.2456 | 0.2143 |   |
| 0.1731 | 0.1505 | 0.1494 | 0.1376 | 0.1389 | 0.1315 | 0.1363 | 0.1265 | 0.1112 |   |
| 0.1652 | 0.1502 | 0.1508 | 0.1354 | 0.1458 | 0.1444 | 0.1447 | 0.1399 | 0.1207 |   |
| 0.1493 | 0.1373 | 0.1356 | 0.1312 | 0.1369 | 0.1167 | 0.1162 | 0.0998 | 0.1011 |   |
| 0.1643 | 0.144  | 0.1385 | 0.1275 | 0.1302 | 0.1177 | 0.1196 | 0.1065 | 0.0805 |   |
| 0.1911 | 0.1757 | 0.1663 | 0.1532 | 0.1626 | 0.1617 | 0.1572 | 0.1615 | 0.1546 |   |
| 0.1884 | 0.1777 | 0.1656 | 0.1567 | 0.1436 | 0.1432 | 0.1627 | 0.165  | 0.1471 |   |
| 0.2309 | 0.2116 | 0.2009 | 0.1989 | 0.1908 | 0.1766 | 0.1698 | 0.1651 | 0.1435 |   |
| 0.309  | 0.3161 | 0.3064 | 0.2954 | 0.2855 | 0.2958 | 0.2843 | 0.2706 | 0.2519 |   |
| 0.1361 | 0.1318 | 0.1269 | 0.1272 | 0.1229 | 0.127  | 0.1305 | 0.1268 | 0.1274 |   |
| 0.1432 | 0.1391 | 0.1385 | 0.1342 | 0.147  | 0.1489 | 0.1521 | 0.1522 | 0.1422 |   |
| 0.1995 | 0.1881 | 0.18   | 0.1756 | 0.1825 | 0.1815 | 0.1815 | 0.1782 | 0.1715 |   |
| 0.154  | 0.1333 | 0.1265 | 0.1261 | 0.1174 | 0.114  | 0.1277 | 0.1327 | 0.1244 |   |
| 0.1906 | 0.1692 | 0.1579 | 0.1424 | 0.1473 | 0.1423 | 0.1424 | 0.1261 | 0.119  |   |
| 0.1455 | 0.139  | 0.1336 | 0.1186 | 0.1264 | 0.1158 | 0.1124 | 0.1058 | 0.0816 |   |
| 0.1841 | 0.1703 | 0.1683 | 0.1633 | 0.1604 | 0.1419 | 0.1473 | 0.1388 | 0.1192 |   |
| 0.1939 | 0.1899 | 0.1849 | 0.1849 | 0.1805 | 0.1868 | 0.1914 | 0.1886 | 0.1834 |   |
| 0.1993 | 0.1892 | 0.19   | 0.1875 | 0.1917 | 0.1822 | 0.1844 | 0.1674 | 0.1576 |   |
| 0.186  | 0.165  | 0.1613 | 0.1655 | 0.1733 | 0.1677 | 0.1784 | 0.1593 | 0.1356 |   |
| 0.1441 | 0.1304 | 0.1201 | 0.1214 | 0.123  | 0.1207 | 0.1352 | 0.1315 | 0.11   |   |
| 0.1647 | 0.1571 | 0.1558 | 0.1505 | 0.156  | 0.1581 | 0.1657 | 0.1548 | 0.1474 |   |
| 0.1555 | 0.1421 | 0.156  | 0.1368 | 0.1416 | 0.1564 | 0.1603 | 0.1558 | 0.1455 |   |
| 0.1458 | 0.1212 | 0.1158 | 0.0973 | 0.1124 | 0.107  | 0.132  | 0.1351 | 0.1047 |   |
| 0.1958 | 0.1889 | 0.1772 | 0.1688 | 0.1852 | 0.1774 | 0.1783 | 0.1659 | 0.147  |   |
| 0.1566 | 0.1519 | 0.1543 | 0.1547 | 0.1769 | 0.177  | 0.1752 | 0.1729 | 0.164  |   |
| 0.1537 | 0.1471 | 0.1497 | 0.147  | 0.1537 | 0.154  | 0.1572 | 0.1552 | 0.1519 |   |
| 0.1808 | 0.1768 | 0.1778 | 0.1748 | 0.1807 | 0.1841 | 0.1875 | 0.1855 | 0.1745 |   |
| 0.1624 | 0.1379 | 0.1131 | 0.0989 | 0.1011 | 0.0997 | 0.1108 | 0.0959 | 0.0995 |   |
| 0.1515 | 0.1434 | 0.1334 | 0.1126 | 0.1248 | 0.1258 | 0.1239 | 0.122  | 0.1074 |   |
| 0.1845 | 0.1627 | 0.1544 | 0.1518 | 0.1606 | 0.1318 | 0.1214 | 0.1206 | 0.1163 |   |
| 0.1767 | 0.1768 | 0.1859 | 0.1683 | 0.1612 | 0.137  | 0.1447 | 0.1419 | 0.1324 |   |

|        |        |        |        |        |        |        |        |        |
|--------|--------|--------|--------|--------|--------|--------|--------|--------|
| 0.1384 | 0.1218 | 0.1087 | 0.1024 | 0.1023 | 0.1012 | 0.0961 | 0.0792 | 0.0773 |
| 0.1413 | 0.135  | 0.1333 | 0.1354 | 0.1356 | 0.1362 | 0.1394 | 0.1348 | 0.1294 |
| 0.1113 | 0.1147 | 0.1109 | 0.1228 | 0.1184 | 0.1225 | 0.1193 | 0.1182 | 0.1116 |
| 0.1843 | 0.1891 | 0.1821 | 0.1807 | 0.1833 | 0.1822 | 0.182  | 0.1791 | 0.1798 |
| 0.0037 | 0.0042 | 0.0039 | 0.0038 | 0.0035 | 0.0036 | 0.0037 | 0.0035 | 0.0032 |
| 0.0043 | 0.0043 | 0.0043 | 0.0047 | 0.0041 | 0.0039 | 0.004  | 0.0037 | 0.0038 |
| 0      | 0      | 0      | 0      | 0      | 0      | 0      | 0      | 0      |
| 0      | 0      | 0      | 0      | 0      | 0      | 0      | 0      | 0      |
| 0      | 0      | 0      | 0      | 0      | 0      | 0      | 0      | 0      |
| 0      | 0      | 0      | 0      | 0      | 0      | 0      | 0      | 0      |
| 0      | 0      | 0      | 0      | 0      | 0      | 0      | 0      | 0      |
| 0      | 0      | 0      | 0      | 0      | 0      | 0      | 0      | 0      |
| 0      | 0      | 0      | 0      | 0      | 0      | 0      | 0      | 0      |
| 0      | 0      | 0      | 0      | 0      | 0      | 0      | 0      | 0      |
| 0.007  | 0.0068 | 0.0069 | 0.0067 | 0.0068 | 0.0068 | 0.0065 | 0.0063 | 0.0062 |
| 0.0438 | 0.0408 | 0.0399 | 0.0397 | 0.0411 | 0.0398 | 0.0415 | 0.0412 | 0.0397 |
| 0.0906 | 0.0835 | 0.0867 | 0.0852 | 0.0899 | 0.0927 | 0.0967 | 0.0927 | 0.0854 |
| 0.1034 | 0.1039 | 0.1022 | 0.1023 | 0.0987 | 0.1002 | 0.1009 | 0.0983 | 0.094  |
| 0.2314 | 0.2272 | 0.2204 | 0.2191 | 0.1997 | 0.1906 | 0.1994 | 0.1896 | 0.1776 |
| 0.2384 | 0.2202 | 0.2242 | 0.2517 | 0.2468 | 0.248  | 0.247  | 0.2429 | 0.2112 |
| 0.1991 | 0.1849 | 0.1861 | 0.1782 | 0.1853 | 0.1788 | 0.1853 | 0.1821 | 0.1608 |
| 0.1971 | 0.1809 | 0.1853 | 0.1762 | 0.1638 | 0.1648 | 0.1645 | 0.16   | 0.1472 |
| 0.1372 | 0.1275 | 0.1111 | 0.1028 | 0.1156 | 0.1211 | 0.1213 | 0.1158 | 0.0962 |
| 0.2368 | 0.2139 | 0.2013 | 0.1897 | 0.2112 | 0.1994 | 0.202  | 0.2028 | 0.1822 |
| 0.1253 | 0.1196 | 0.1114 | 0.1092 | 0.1115 | 0.103  | 0.1085 | 0.1229 | 0.1033 |
| 0.1455 | 0.1198 | 0.1319 | 0.1466 | 0.1781 | 0.1657 | 0.1689 | 0.1626 | 0.1254 |
| 0.1876 | 0.1609 | 0.1384 | 0.1383 | 0.1328 | 0.1112 | 0.1178 | 0.1254 | 0.1013 |
| 0.2182 | 0.224  | 0.2124 | 0.2277 | 0.2277 | 0.2404 | 0.2208 | 0.2151 | 0.1975 |
| 0.1738 | 0.1682 | 0.1665 | 0.1648 | 0.1619 | 0.1645 | 0.1619 | 0.1665 | 0.1664 |
| 0.106  | 0.0977 | 0.1023 | 0.0996 | 0.1026 | 0.1012 | 0.1055 | 0.1078 | 0.1036 |
| 0.1168 | 0.1118 | 0.1089 | 0.1103 | 0.1116 | 0.1126 | 0.1169 | 0.1113 | 0.1069 |
| 0.1123 | 0.1043 | 0.1034 | 0.1082 | 0.115  | 0.1172 | 0.1207 | 0.1149 | 0.1084 |
| 0.1495 | 0.1409 | 0.1411 | 0.1387 | 0.1426 | 0.1433 | 0.1459 | 0.1427 | 0.1351 |
| 0.1715 | 0.161  | 0.1535 | 0.1508 | 0.1538 | 0.156  | 0.1617 | 0.1595 | 0.1478 |
| 0.1706 | 0.1488 | 0.1489 | 0.1375 | 0.1539 | 0.1555 | 0.1498 | 0.1532 | 0.1371 |
| 0.1949 | 0.195  | 0.2056 | 0.1905 | 0.1978 | 0.2036 | 0.2062 | 0.2112 | 0.181  |
| 0.1768 | 0.1631 | 0.1564 | 0.1537 | 0.1731 | 0.1553 | 0.1593 | 0.1629 | 0.1429 |
| 0.1823 | 0.172  | 0.1631 | 0.1509 | 0.1549 | 0.1494 | 0.1518 | 0.1396 | 0.1294 |
| 0.1549 | 0.1502 | 0.1461 | 0.1373 | 0.1439 | 0.1424 | 0.1437 | 0.1433 | 0.1153 |
| 0.1499 | 0.1457 | 0.1384 | 0.1331 | 0.1435 | 0.1417 | 0.1476 | 0.1467 | 0.139  |
| 0.1599 | 0.1588 | 0.1489 | 0.1464 | 0.1475 | 0.1346 | 0.1393 | 0.1418 | 0.1315 |
| 0.1394 | 0.1268 | 0.1155 | 0.1023 | 0.0983 | 0.0939 | 0.1105 | 0.0865 | 0.0755 |
| 0.1577 | 0.1563 | 0.1521 | 0.1376 | 0.1491 | 0.1365 | 0.1463 | 0.1238 | 0.1111 |
| 0.1499 | 0.1381 | 0.1414 | 0.129  | 0.1401 | 0.1224 | 0.1339 | 0.1386 | 0.1174 |

|        |        |        |        |        |        |        |        |        |
|--------|--------|--------|--------|--------|--------|--------|--------|--------|
| 0.1412 | 0.1346 | 0.1334 | 0.1262 | 0.1304 | 0.1265 | 0.1315 | 0.1261 | 0.1197 |
| 0.1787 | 0.1768 | 0.1724 | 0.168  | 0.1774 | 0.1733 | 0.1693 | 0.1636 | 0.1548 |
| 0.1436 | 0.1368 | 0.1358 | 0.1478 | 0.1515 | 0.1435 | 0.1501 | 0.1538 | 0.1425 |
| 0.1887 | 0.164  | 0.1511 | 0.1303 | 0.1376 | 0.1366 | 0.1583 | 0.125  | 0.1067 |
| 0.1799 | 0.15   | 0.1454 | 0.1424 | 0.156  | 0.1586 | 0.1616 | 0.1553 | 0.1307 |
| 0.1712 | 0.1569 | 0.1517 | 0.1417 | 0.1401 | 0.1502 | 0.1569 | 0.158  | 0.1534 |
| 0.15   | 0.1456 | 0.1411 | 0.136  | 0.1348 | 0.1321 | 0.138  | 0.1296 | 0.128  |
| 0.1437 | 0.1389 | 0.1385 | 0.1381 | 0.1424 | 0.1459 | 0.1505 | 0.1482 | 0.1458 |
| 0.0226 | 0.0213 | 0.0215 | 0.0218 | 0.0217 | 0.0214 | 0.0222 | 0.0208 | 0.0206 |
| 0.0213 | 0.0205 | 0.0203 | 0.0202 | 0.0205 | 0.0211 | 0.0216 | 0.0215 | 0.0211 |
| 0.0042 | 0.0044 | 0.004  | 0.004  | 0.0038 | 0.0038 | 0.0037 | 0.0035 | 0.0034 |
| 0.004  | 0.0042 | 0.004  | 0.004  | 0.004  | 0.0037 | 0.0037 | 0.0036 | 0.0036 |
| 0.0012 | 0.0011 | 0.001  | 0.0011 | 0.001  | 0.0009 | 0.0011 | 0.0011 | 0.0009 |
| 0.002  | 0.0021 | 0.0021 | 0.0021 | 0.0022 | 0.0022 | 0.0024 | 0.0024 | 0.0024 |
| 0.0051 | 0.0051 | 0.005  | 0.0051 | 0.0049 | 0.0052 | 0.0053 | 0.0053 | 0.0055 |
| 0.0076 | 0.0073 | 0.0067 | 0.0061 | 0.0058 | 0.0056 | 0.0057 | 0.0056 | 0.0053 |
| 0.0067 | 0.0065 | 0.0071 | 0.007  | 0.0073 | 0.0078 | 0.0085 | 0.009  | 0.0088 |
| 0.0109 | 0.0103 | 0.01   | 0.0096 | 0.0091 | 0.0087 | 0.0085 | 0.0081 | 0.0074 |
| 0.0525 | 0.0532 | 0.0495 | 0.0452 | 0.0449 | 0.0467 | 0.0489 | 0.0444 | 0.0445 |
| 0.1036 | 0.1031 | 0.0996 | 0.0934 | 0.0874 | 0.0926 | 0.094  | 0.0963 | 0.0991 |
| 0.0716 | 0.0704 | 0.0706 | 0.0703 | 0.0752 | 0.076  | 0.0831 | 0.0788 | 0.0796 |
| 0.1479 | 0.1392 | 0.1394 | 0.1339 | 0.1383 | 0.1402 | 0.1456 | 0.1448 | 0.142  |
| 0.1455 | 0.1365 | 0.1383 | 0.1377 | 0.1407 | 0.1371 | 0.1376 | 0.1378 | 0.1318 |
| 0.1183 | 0.1106 | 0.1007 | 0.0991 | 0.1031 | 0.1061 | 0.1026 | 0.1036 | 0.0903 |
| 0.1069 | 0.0877 | 0.0775 | 0.0801 | 0.0808 | 0.0707 | 0.0735 | 0.069  | 0.0605 |
| 0.1853 | 0.1834 | 0.1636 | 0.1676 | 0.1784 | 0.1808 | 0.1858 | 0.1663 | 0.1498 |
| 0.1898 | 0.1614 | 0.1539 | 0.1464 | 0.156  | 0.1382 | 0.1425 | 0.1319 | 0.1248 |
| 0.17   | 0.1514 | 0.1328 | 0.1251 | 0.1288 | 0.1167 | 0.131  | 0.1239 | 0.119  |
| 0.1471 | 0.1389 | 0.1337 | 0.1302 | 0.125  | 0.1203 | 0.1281 | 0.1259 | 0.1115 |
| 0.2252 | 0.2173 | 0.2185 | 0.2048 | 0.183  | 0.1908 | 0.2082 | 0.1896 | 0.168  |
| 0.2157 | 0.2139 | 0.2133 | 0.2035 | 0.2025 | 0.2049 | 0.2063 | 0.1921 | 0.1761 |
| 0.1526 | 0.1281 | 0.1073 | 0.0863 | 0.098  | 0.109  | 0.0827 | 0.0917 | 0.077  |
| 0.1671 | 0.1298 | 0.1304 | 0.1256 | 0.1258 | 0.1145 | 0.0984 | 0.0877 | 0.0751 |
| 0.1774 | 0.1774 | 0.1773 | 0.1691 | 0.1694 | 0.1638 | 0.1676 | 0.1701 | 0.1553 |
| 0.2547 | 0.2639 | 0.2568 | 0.2641 | 0.2613 | 0.2674 | 0.2448 | 0.2325 | 0.2384 |
| 0.1695 | 0.1623 | 0.1461 | 0.1486 | 0.1385 | 0.1368 | 0.1384 | 0.1384 | 0.1217 |
| 0.1992 | 0.2156 | 0.1956 | 0.2015 | 0.1879 | 0.1934 | 0.2021 | 0.2011 | 0.1867 |
| 0.1677 | 0.1599 | 0.1599 | 0.1593 | 0.1622 | 0.163  | 0.1671 | 0.162  | 0.1558 |
| 0.1536 | 0.1404 | 0.1384 | 0.1431 | 0.142  | 0.1401 | 0.1425 | 0.1426 | 0.1364 |
| 0.1572 | 0.1479 | 0.1475 | 0.1438 | 0.1467 | 0.149  | 0.159  | 0.1576 | 0.1523 |
| 0.1653 | 0.1494 | 0.1571 | 0.1462 | 0.1556 | 0.1446 | 0.1486 | 0.1467 | 0.1302 |
| 0.1731 | 0.1453 | 0.1446 | 0.1352 | 0.1349 | 0.1305 | 0.1339 | 0.1223 | 0.105  |
| 0.1735 | 0.144  | 0.1383 | 0.1367 | 0.1441 | 0.1403 | 0.1406 | 0.1332 | 0.1053 |
| 0.165  | 0.1441 | 0.1518 | 0.1544 | 0.1516 | 0.1469 | 0.1502 | 0.1379 | 0.1249 |

|        |        |        |        |        |        |        |        |        |
|--------|--------|--------|--------|--------|--------|--------|--------|--------|
| 0.1609 | 0.1456 | 0.1445 | 0.1405 | 0.1504 | 0.1492 | 0.1518 | 0.1508 | 0.1366 |
| 0.1567 | 0.1483 | 0.1482 | 0.1458 | 0.1514 | 0.1483 | 0.1507 | 0.1419 | 0.1348 |
| 0.1516 | 0.1237 | 0.109  | 0.1172 | 0.1273 | 0.1248 | 0.123  | 0.1213 | 0.1119 |
| 0.161  | 0.1388 | 0.1234 | 0.1187 | 0.1349 | 0.129  | 0.1205 | 0.1138 | 0.1067 |
| 0.1552 | 0.1529 | 0.1444 | 0.1427 | 0.1527 | 0.1448 | 0.1409 | 0.133  | 0.1213 |
| 0.1642 | 0.1678 | 0.1604 | 0.1625 | 0.1678 | 0.1671 | 0.172  | 0.1701 | 0.1583 |
| 0.1928 | 0.1797 | 0.1666 | 0.1516 | 0.1531 | 0.141  | 0.1301 | 0.1318 | 0.123  |
| 0.1697 | 0.1704 | 0.1633 | 0.1598 | 0.1739 | 0.1729 | 0.1806 | 0.165  | 0.1531 |
| 0.1337 | 0.1162 | 0.1047 | 0.1032 | 0.1137 | 0.1047 | 0.1123 | 0.1054 | 0.0981 |
| 0.1229 | 0.1018 | 0.1041 | 0.109  | 0.107  | 0.0891 | 0.0915 | 0.0908 | 0.0779 |
| 0.1511 | 0.1483 | 0.15   | 0.1557 | 0.1608 | 0.1496 | 0.1474 | 0.1375 | 0.128  |
| 0.2092 | 0.1967 | 0.1875 | 0.1767 | 0.1742 | 0.1735 | 0.1759 | 0.1847 | 0.1791 |
| 0.2048 | 0.2062 | 0.1936 | 0.1883 | 0.1867 | 0.1955 | 0.1949 | 0.1947 | 0.1981 |
| 0.1658 | 0.1634 | 0.161  | 0.1612 | 0.1598 | 0.1626 | 0.1598 | 0.1523 | 0.1429 |
| 0.0162 | 0.0156 | 0.0156 | 0.0154 | 0.0158 | 0.016  | 0.0166 | 0.0162 | 0.016  |
| 0.0076 | 0.0071 | 0.0061 | 0.006  | 0.0057 | 0.0061 | 0.0059 | 0.0056 | 0.0053 |
| 0      | 0      | 0      | 0      | 0      | 0      | 0      | 0      | 0      |
| 0      | 0      | 0      | 0      | 0      | 0      | 0      | 0      | 0      |
| 0.0016 | 0.0015 | 0.0015 | 0.0015 | 0.0015 | 0.0015 | 0.0016 | 0.0016 | 0.0016 |
| 0.0035 | 0.0034 | 0.0034 | 0.0035 | 0.0035 | 0.0037 | 0.004  | 0.0039 | 0.0044 |
| 0.0129 | 0.0138 | 0.014  | 0.0141 | 0.0135 | 0.0139 | 0.014  | 0.0141 | 0.0145 |
| 0.0201 | 0.018  | 0.0173 | 0.0191 | 0.0179 | 0.019  | 0.0182 | 0.018  | 0.0171 |
| 0.0177 | 0.0172 | 0.0172 | 0.0178 | 0.017  | 0.017  | 0.0166 | 0.0159 | 0.0163 |
| 0.0146 | 0.016  | 0.0181 | 0.0185 | 0.0182 | 0.0177 | 0.0172 | 0.0171 | 0.0173 |
| 0.0519 | 0.0519 | 0.0516 | 0.0506 | 0.0498 | 0.0512 | 0.0535 | 0.0516 | 0.0495 |
| 0.1391 | 0.1383 | 0.1388 | 0.1397 | 0.1371 | 0.1415 | 0.1434 | 0.1413 | 0.1465 |
| 0.2002 | 0.1962 | 0.1994 | 0.2007 | 0.2038 | 0.2073 | 0.2118 | 0.2109 | 0.2117 |
| 0.1685 | 0.162  | 0.167  | 0.1696 | 0.1774 | 0.1864 | 0.194  | 0.197  | 0.1976 |
| 0.133  | 0.1263 | 0.1289 | 0.1251 | 0.1374 | 0.14   | 0.1454 | 0.1459 | 0.145  |
| 0.1745 | 0.1611 | 0.1491 | 0.1306 | 0.1377 | 0.1253 | 0.1306 | 0.1262 | 0.1048 |
| 0.1523 | 0.1404 | 0.1309 | 0.1271 | 0.1271 | 0.1353 | 0.1346 | 0.1179 | 0.1204 |
| 0.1558 | 0.134  | 0.1261 | 0.1135 | 0.1205 | 0.1059 | 0.1132 | 0.1099 | 0.1018 |
| 0.1274 | 0.1049 | 0.1059 | 0.1079 | 0.1205 | 0.1186 | 0.1232 | 0.1208 | 0.1135 |
| 0.1773 | 0.1718 | 0.1515 | 0.1508 | 0.1665 | 0.1485 | 0.1544 | 0.1462 | 0.1351 |
| 0.1253 | 0.11   | 0.1068 | 0.1129 | 0.1134 | 0.1105 | 0.1233 | 0.1161 | 0.1078 |
| 0.1764 | 0.1612 | 0.1563 | 0.1664 | 0.1697 | 0.1575 | 0.16   | 0.1547 | 0.142  |
| 0.1576 | 0.129  | 0.1254 | 0.1244 | 0.1337 | 0.1241 | 0.124  | 0.1019 | 0.1048 |
| 0.1835 | 0.1649 | 0.1612 | 0.1539 | 0.1596 | 0.1378 | 0.1329 | 0.1306 | 0.1032 |
| 0.2251 | 0.222  | 0.2064 | 0.2015 | 0.1959 | 0.188  | 0.1815 | 0.1689 | 0.1511 |
| 0.2368 | 0.252  | 0.2513 | 0.2758 | 0.2451 | 0.2523 | 0.2494 | 0.2382 | 0.2363 |
| 0.3938 | 0.4239 | 0.3927 | 0.4235 | 0.4018 | 0.4118 | 0.3914 | 0.397  | 0.4042 |
| 0.2269 | 0.2532 | 0.2409 | 0.257  | 0.2203 | 0.2217 | 0.2324 | 0.2225 | 0.2114 |
| 0.2117 | 0.223  | 0.2198 | 0.2164 | 0.1949 | 0.2065 | 0.2004 | 0.1925 | 0.184  |
| 0.171  | 0.1666 | 0.1603 | 0.1537 | 0.1415 | 0.1457 | 0.1477 | 0.1418 | 0.1445 |

|        |        |        |        |        |        |        |        |        |
|--------|--------|--------|--------|--------|--------|--------|--------|--------|
| 0.1703 | 0.1579 | 0.1437 | 0.1395 | 0.1295 | 0.1216 | 0.1137 | 0.1214 | 0.1017 |
| 0.1447 | 0.1308 | 0.1247 | 0.1121 | 0.106  | 0.1081 | 0.1077 | 0.1078 | 0.0995 |
| 0.1834 | 0.1641 | 0.1532 | 0.1478 | 0.1494 | 0.1536 | 0.1584 | 0.1326 | 0.1163 |
| 0.1536 | 0.1544 | 0.157  | 0.1381 | 0.1421 | 0.1289 | 0.1272 | 0.1233 | 0.1152 |
| 0.163  | 0.148  | 0.1288 | 0.1029 | 0.0993 | 0.1064 | 0.11   | 0.1072 | 0.0879 |
| 0.1513 | 0.1443 | 0.1433 | 0.1394 | 0.1418 | 0.1407 | 0.1491 | 0.1482 | 0.1269 |
| 0.1479 | 0.1479 | 0.1557 | 0.1501 | 0.1583 | 0.1547 | 0.1518 | 0.1587 | 0.1412 |
| 0.1535 | 0.1538 | 0.1516 | 0.1503 | 0.1496 | 0.1426 | 0.1561 | 0.1463 | 0.1424 |
| 0.1332 | 0.1262 | 0.1196 | 0.1278 | 0.1354 | 0.1402 | 0.1468 | 0.1539 | 0.138  |
| 0.1804 | 0.1744 | 0.1642 | 0.154  | 0.1625 | 0.1482 | 0.1586 | 0.1472 | 0.1163 |
| 0.2195 | 0.2057 | 0.1803 | 0.1561 | 0.1573 | 0.1365 | 0.1415 | 0.1421 | 0.1385 |
| 0.2054 | 0.189  | 0.1816 | 0.1793 | 0.1862 | 0.159  | 0.1727 | 0.1679 | 0.1531 |
| 0.1698 | 0.1701 | 0.16   | 0.1549 | 0.1592 | 0.1442 | 0.1401 | 0.1391 | 0.1275 |
| 0.1258 | 0.1111 | 0.1057 | 0.1126 | 0.1211 | 0.1242 | 0.1247 | 0.1243 | 0.1034 |
| 0.1876 | 0.1807 | 0.1707 | 0.1717 | 0.1736 | 0.1844 | 0.1833 | 0.1671 | 0.153  |
| 0.1872 | 0.1767 | 0.1712 | 0.1468 | 0.1452 | 0.1363 | 0.1463 | 0.1578 | 0.1314 |
| 0.1394 | 0.1436 | 0.1147 | 0.1058 | 0.1286 | 0.121  | 0.1223 | 0.116  | 0.0931 |
| 0.192  | 0.1918 | 0.1962 | 0.1701 | 0.1656 | 0.1647 | 0.1774 | 0.1756 | 0.1681 |
| 0.2439 | 0.2287 | 0.2156 | 0.2097 | 0.2023 | 0.2004 | 0.2032 | 0.1991 | 0.1871 |
| 0.176  | 0.1626 | 0.152  | 0.149  | 0.1445 | 0.1403 | 0.15   | 0.1429 | 0.1177 |
| 0.0184 | 0.017  | 0.0163 | 0.0157 | 0.0156 | 0.0151 | 0.0155 | 0.0146 | 0.014  |
| 0.0258 | 0.0263 | 0.0261 | 0.0275 | 0.0272 | 0.0268 | 0.0255 | 0.027  | 0.0273 |
| 0      | 0      | 0      | 0      | 0      | 0      | 0      | 0      | 0      |
| 0      | 0      | 0      | 0      | 0      | 0      | 0      | 0      | 0      |
| 0.0081 | 0.0085 | 0.0078 | 0.0077 | 0.0075 | 0.0081 | 0.008  | 0.0081 | 0.0082 |
| 0.0055 | 0.0051 | 0.0049 | 0.0045 | 0.0045 | 0.0044 | 0.0043 | 0.0039 | 0.0037 |
| 0.0103 | 0.0104 | 0.0101 | 0.01   | 0.0097 | 0.0098 | 0.0101 | 0.01   | 0.0101 |
| 0.0181 | 0.0185 | 0.0199 | 0.0204 | 0.0185 | 0.0188 | 0.0179 | 0.0191 | 0.0184 |
| 0.0251 | 0.0264 | 0.026  | 0.0257 | 0.0233 | 0.0229 | 0.0223 | 0.0233 | 0.0224 |
| 0.024  | 0.0227 | 0.0213 | 0.0204 | 0.0209 | 0.0204 | 0.0209 | 0.0186 | 0.018  |
| 0.0578 | 0.0576 | 0.0555 | 0.0546 | 0.0541 | 0.0572 | 0.0584 | 0.0593 | 0.0583 |
| 0.1512 | 0.1483 | 0.1497 | 0.1509 | 0.1527 | 0.1571 | 0.1619 | 0.1618 | 0.1614 |
| 0.2027 | 0.1933 | 0.1937 | 0.1939 | 0.1998 | 0.199  | 0.2031 | 0.1994 | 0.1988 |
| 0.1872 | 0.1783 | 0.1759 | 0.1747 | 0.1782 | 0.1812 | 0.1856 | 0.1873 | 0.1865 |
| 0.1419 | 0.1358 | 0.1351 | 0.1345 | 0.1446 | 0.15   | 0.1576 | 0.1579 | 0.1494 |
| 0.2093 | 0.1838 | 0.1816 | 0.1791 | 0.1811 | 0.1631 | 0.1717 | 0.1635 | 0.1594 |
| 0.1598 | 0.1366 | 0.1338 | 0.1334 | 0.1439 | 0.1445 | 0.1584 | 0.1625 | 0.1528 |
| 0.1391 | 0.1289 | 0.1196 | 0.1282 | 0.1278 | 0.1104 | 0.1055 | 0.1131 | 0.1066 |
| 0.1502 | 0.1354 | 0.1372 | 0.1392 | 0.1487 | 0.1438 | 0.1473 | 0.1502 | 0.1457 |
| 0.1667 | 0.1608 | 0.1543 | 0.1471 | 0.1446 | 0.1343 | 0.1413 | 0.1391 | 0.1318 |
| 0.1603 | 0.1436 | 0.1414 | 0.1402 | 0.1485 | 0.1366 | 0.1514 | 0.1506 | 0.1334 |
| 0.1241 | 0.1108 | 0.0998 | 0.0918 | 0.1041 | 0.0946 | 0.0936 | 0.0961 | 0.0935 |
| 0.1877 | 0.1722 | 0.1588 | 0.1664 | 0.1714 | 0.1545 | 0.1527 | 0.1459 | 0.1315 |
| 0.1949 | 0.1777 | 0.1786 | 0.1843 | 0.1801 | 0.1559 | 0.1602 | 0.154  | 0.1315 |

|        |        |        |        |        |        |        |        |        |
|--------|--------|--------|--------|--------|--------|--------|--------|--------|
| 0.2198 | 0.2048 | 0.196  | 0.1895 | 0.1838 | 0.1931 | 0.1857 | 0.1931 | 0.1948 |
| 0.2521 | 0.2487 | 0.2424 | 0.2384 | 0.2341 | 0.2311 | 0.2171 | 0.2152 | 0.2375 |
| 0.3235 | 0.3291 | 0.3073 | 0.3204 | 0.2994 | 0.3075 | 0.321  | 0.2984 | 0.2787 |
| 0.2483 | 0.248  | 0.2458 | 0.2382 | 0.2349 | 0.2369 | 0.232  | 0.2141 | 0.2206 |
| 0.1731 | 0.1678 | 0.1713 | 0.1743 | 0.1716 | 0.1709 | 0.175  | 0.178  | 0.1774 |
| 0.176  | 0.1805 | 0.1751 | 0.1645 | 0.1637 | 0.1679 | 0.1655 | 0.1767 | 0.1719 |
| 0.1581 | 0.1463 | 0.1436 | 0.1345 | 0.1388 | 0.1264 | 0.1291 | 0.1352 | 0.1214 |
| 0.1976 | 0.1703 | 0.1617 | 0.1602 | 0.1755 | 0.1585 | 0.1717 | 0.1771 | 0.1652 |
| 0.1914 | 0.1834 | 0.1667 | 0.1731 | 0.1663 | 0.1686 | 0.1674 | 0.1506 | 0.14   |
| 0.1387 | 0.1294 | 0.1216 | 0.1166 | 0.1243 | 0.1095 | 0.1218 | 0.1182 | 0.107  |
| 0.1692 | 0.1428 | 0.1355 | 0.1279 | 0.1402 | 0.1266 | 0.1423 | 0.1375 | 0.1187 |
| 0.1938 | 0.1747 | 0.1737 | 0.1643 | 0.1606 | 0.1493 | 0.1346 | 0.1208 | 0.1027 |
| 0.2198 | 0.2166 | 0.1989 | 0.1832 | 0.1823 | 0.1733 | 0.1831 | 0.1731 | 0.1593 |
| 0.1806 | 0.1688 | 0.167  | 0.1592 | 0.1599 | 0.1394 | 0.1549 | 0.1544 | 0.1332 |
| 0.2026 | 0.1817 | 0.1844 | 0.192  | 0.1886 | 0.1489 | 0.1579 | 0.1508 | 0.125  |
| 0.2015 | 0.1833 | 0.1811 | 0.1663 | 0.1614 | 0.1487 | 0.1464 | 0.1529 | 0.1383 |
| 0.1451 | 0.1339 | 0.1267 | 0.1208 | 0.1233 | 0.122  | 0.1181 | 0.1185 | 0.103  |
| 0.1477 | 0.1276 | 0.1261 | 0.1092 | 0.1259 | 0.125  | 0.1172 | 0.1244 | 0.1075 |
| 0.2122 | 0.1989 | 0.194  | 0.1781 | 0.184  | 0.188  | 0.1824 | 0.1656 | 0.1493 |
| 0.1997 | 0.1964 | 0.1857 | 0.1876 | 0.183  | 0.1788 | 0.1852 | 0.1797 | 0.1775 |
| 0.2223 | 0.2145 | 0.2032 | 0.2003 | 0.1975 | 0.193  | 0.2041 | 0.2034 | 0.2029 |
| 0.1981 | 0.1894 | 0.1834 | 0.1718 | 0.1784 | 0.1559 | 0.1517 | 0.1508 | 0.1428 |
| 0.1748 | 0.1593 | 0.1666 | 0.16   | 0.1359 | 0.1309 | 0.1316 | 0.1222 | 0.1209 |
| 0.1771 | 0.1605 | 0.1464 | 0.1237 | 0.1238 | 0.1141 | 0.124  | 0.1133 | 0.1105 |
| 0.2415 | 0.2463 | 0.233  | 0.1988 | 0.1916 | 0.1857 | 0.2037 | 0.2008 | 0.1885 |
| 0.1449 | 0.1361 | 0.1335 | 0.1242 | 0.1216 | 0.1117 | 0.1085 | 0.1024 | 0.0896 |
| 0.0143 | 0.0141 | 0.013  | 0.0129 | 0.013  | 0.0124 | 0.0126 | 0.0128 | 0.0112 |
| 0.0262 | 0.0275 | 0.0263 | 0.0259 | 0.0246 | 0.0239 | 0.0252 | 0.0261 | 0.0257 |
| 0      | 0      | 0      | 0      | 0      | 0      | 0      | 0      | 0      |
| 0      | 0      | 0      | 0      | 0      | 0      | 0      | 0      | 0      |
| 0.0039 | 0.0039 | 0.0039 | 0.004  | 0.004  | 0.004  | 0.0042 | 0.0042 | 0.0043 |
| 0.0034 | 0.003  | 0.003  | 0.0027 | 0.0031 | 0.0027 | 0.003  | 0.0031 | 0.0023 |
| 0.0018 | 0.0017 | 0.0019 | 0.002  | 0.0019 | 0.002  | 0.0022 | 0.0022 | 0.0023 |
| 0.0117 | 0.0114 | 0.0118 | 0.0114 | 0.01   | 0.0104 | 0.011  | 0.0105 | 0.0111 |
| 0.0197 | 0.0198 | 0.0191 | 0.0194 | 0.0184 | 0.0193 | 0.0195 | 0.02   | 0.0199 |
| 0.0105 | 0.0106 | 0.0106 | 0.0114 | 0.0105 | 0.0103 | 0.0109 | 0.0096 | 0.0102 |
| 0.0392 | 0.038  | 0.0382 | 0.0379 | 0.0388 | 0.0395 | 0.0406 | 0.0406 | 0.0402 |
| 0.134  | 0.1279 | 0.1313 | 0.1313 | 0.1366 | 0.1388 | 0.1433 | 0.1422 | 0.1418 |
| 0.1485 | 0.1371 | 0.1239 | 0.1262 | 0.1316 | 0.1275 | 0.1312 | 0.1232 | 0.1192 |
| 0.2078 | 0.1892 | 0.183  | 0.1829 | 0.1843 | 0.1901 | 0.1875 | 0.1869 | 0.1737 |
| 0.2746 | 0.2552 | 0.2469 | 0.2496 | 0.2399 | 0.2443 | 0.236  | 0.234  | 0.2367 |
| 0.1968 | 0.1845 | 0.1882 | 0.1875 | 0.1871 | 0.1849 | 0.1837 | 0.1787 | 0.1557 |
| 0.1506 | 0.1348 | 0.1354 | 0.123  | 0.127  | 0.1262 | 0.1318 | 0.1252 | 0.113  |
| 0.1311 | 0.1232 | 0.1135 | 0.1164 | 0.1286 | 0.1309 | 0.1339 | 0.1394 | 0.1314 |



|        |        |        |        |        |        |        |        |        |
|--------|--------|--------|--------|--------|--------|--------|--------|--------|
| 0.1789 | 0.1719 | 0.169  | 0.1494 | 0.1564 | 0.1464 | 0.1446 | 0.148  | 0.1337 |
| 0.1484 | 0.1344 | 0.1366 | 0.1183 | 0.1165 | 0.1154 | 0.1238 | 0.1237 | 0.1152 |
| 0.1628 | 0.1479 | 0.1437 | 0.1515 | 0.1598 | 0.1615 | 0.1617 | 0.1534 | 0.1418 |
| 0.1583 | 0.1365 | 0.1373 | 0.1283 | 0.1319 | 0.1094 | 0.1185 | 0.1196 | 0.1016 |
| 0.1569 | 0.1717 | 0.1609 | 0.1607 | 0.159  | 0.1521 | 0.1505 | 0.1378 | 0.1217 |
| 0.1799 | 0.151  | 0.1404 | 0.1333 | 0.1277 | 0.141  | 0.1299 | 0.1276 | 0.1094 |
| 0.147  | 0.1327 | 0.1271 | 0.1366 | 0.1361 | 0.1329 | 0.139  | 0.135  | 0.1263 |
| 0.1497 | 0.1438 | 0.1405 | 0.1407 | 0.1423 | 0.1469 | 0.1491 | 0.1453 | 0.1407 |
| 0.2038 | 0.1992 | 0.195  | 0.1974 | 0.1996 | 0.2001 | 0.1996 | 0.197  | 0.1929 |
| 0.1381 | 0.134  | 0.1336 | 0.1326 | 0.1363 | 0.1385 | 0.1433 | 0.1415 | 0.139  |
| 0.1573 | 0.1534 | 0.1521 | 0.1532 | 0.152  | 0.1519 | 0.1564 | 0.1592 | 0.147  |
| 0.1907 | 0.1792 | 0.1598 | 0.1529 | 0.1592 | 0.1581 | 0.1629 | 0.1616 | 0.149  |
| 0.1983 | 0.1899 | 0.1785 | 0.1661 | 0.1611 | 0.1461 | 0.1463 | 0.1447 | 0.1232 |
| 0.2048 | 0.1907 | 0.1755 | 0.1687 | 0.1662 | 0.1583 | 0.1481 | 0.1352 | 0.1143 |
| 0.1693 | 0.1486 | 0.1508 | 0.1474 | 0.1439 | 0.1386 | 0.1484 | 0.143  | 0.1342 |
| 0.1721 | 0.164  | 0.1658 | 0.1622 | 0.1693 | 0.1704 | 0.1776 | 0.1783 | 0.1748 |
| 0.1715 | 0.1648 | 0.1626 | 0.1611 | 0.1716 | 0.173  | 0.1788 | 0.1837 | 0.1831 |
| 0.193  | 0.1805 | 0.1839 | 0.1744 | 0.167  | 0.1685 | 0.18   | 0.193  | 0.1702 |
| 0.2591 | 0.2313 | 0.2218 | 0.2141 | 0.2119 | 0.2182 | 0.2205 | 0.2361 | 0.2255 |
| 0.179  | 0.1624 | 0.154  | 0.1423 | 0.1485 | 0.1372 | 0.1478 | 0.1413 | 0.1372 |
| 0.1712 | 0.1567 | 0.1532 | 0.1414 | 0.1403 | 0.1297 | 0.1407 | 0.1394 | 0.1287 |
| 0.1572 | 0.1471 | 0.1296 | 0.1222 | 0.1186 | 0.1285 | 0.1388 | 0.1297 | 0.1079 |
| 0.1533 | 0.1382 | 0.146  | 0.1272 | 0.1389 | 0.1398 | 0.1556 | 0.1482 | 0.1423 |
| 0.1929 | 0.18   | 0.166  | 0.1578 | 0.1682 | 0.1591 | 0.1682 | 0.1567 | 0.1541 |
| 0.2304 | 0.2282 | 0.2269 | 0.2097 | 0.2136 | 0.2155 | 0.2228 | 0.2224 | 0.1846 |
| 0.2824 | 0.2739 | 0.2644 | 0.2586 | 0.2359 | 0.2302 | 0.2426 | 0.2397 | 0.2131 |
| 0.2238 | 0.2029 | 0.1862 | 0.1899 | 0.1838 | 0.171  | 0.1876 | 0.1881 | 0.1802 |
| 0.1932 | 0.1832 | 0.1701 | 0.1653 | 0.1531 | 0.1485 | 0.1542 | 0.1454 | 0.1287 |
| 0.1564 | 0.1492 | 0.1432 | 0.1333 | 0.13   | 0.1334 | 0.1567 | 0.1409 | 0.1369 |
| 0.1726 | 0.1573 | 0.154  | 0.1441 | 0.1406 | 0.1225 | 0.1087 | 0.1065 | 0.0931 |
| 0.1326 | 0.1325 | 0.1283 | 0.1317 | 0.1242 | 0.1141 | 0.1169 | 0.1231 | 0.1076 |
| 0.0876 | 0.0871 | 0.0818 | 0.0708 | 0.0743 | 0.0691 | 0.072  | 0.064  | 0.0533 |
| 0.0124 | 0.0111 | 0.0106 | 0.01   | 0.0105 | 0.0103 | 0.0116 | 0.0108 | 0.0076 |
| 0.0306 | 0.0304 | 0.0268 | 0.0287 | 0.0285 | 0.0279 | 0.0292 | 0.0272 | 0.0247 |
| 0      | 0      | 0      | 0      | 0      | 0      | 0      | 0      | 0      |
| 0      | 0      | 0      | 0      | 0      | 0      | 0      | 0      | 0      |
| 0.0044 | 0.0041 | 0.0044 | 0.0046 | 0.0049 | 0.0053 | 0.0055 | 0.0058 | 0.0061 |
| 0.0043 | 0.004  | 0.0032 | 0.003  | 0.0035 | 0.003  | 0.0029 | 0.0033 | 0.0026 |
| 0      | 0      | 0      | 0      | 0      | 0      | 0      | 0      | 0      |
| 0.0103 | 0.0112 | 0.0116 | 0.011  | 0.0088 | 0.0094 | 0.0093 | 0.0083 | 0.009  |
| 0.0199 | 0.0191 | 0.0179 | 0.0184 | 0.0179 | 0.0183 | 0.0183 | 0.0174 | 0.0185 |
| 0.005  | 0.0055 | 0.0056 | 0.0057 | 0.0054 | 0.0056 | 0.0059 | 0.0059 | 0.0058 |
| 0.0198 | 0.0189 | 0.0191 | 0.0192 | 0.0197 | 0.0197 | 0.019  | 0.0187 | 0.0176 |
| 0.0985 | 0.0898 | 0.0915 | 0.0888 | 0.0933 | 0.0942 | 0.0985 | 0.096  | 0.0924 |

|        |        |        |        |        |        |        |        |        |
|--------|--------|--------|--------|--------|--------|--------|--------|--------|
| 0.1188 | 0.1125 | 0.111  | 0.1056 | 0.11   | 0.1111 | 0.114  | 0.112  | 0.1071 |
| 0.1943 | 0.1871 | 0.1824 | 0.1811 | 0.1758 | 0.1766 | 0.1788 | 0.1646 | 0.1635 |
| 0.2561 | 0.2391 | 0.2429 | 0.2372 | 0.2161 | 0.2268 | 0.2408 | 0.24   | 0.253  |
| 0.2091 | 0.1916 | 0.1963 | 0.1919 | 0.1963 | 0.1938 | 0.1894 | 0.1926 | 0.1825 |
| 0.1379 | 0.132  | 0.1331 | 0.134  | 0.1399 | 0.1414 | 0.1456 | 0.1436 | 0.1344 |
| 0.1749 | 0.1516 | 0.1478 | 0.1437 | 0.1595 | 0.1495 | 0.1556 | 0.147  | 0.1318 |
| 0.1599 | 0.1522 | 0.147  | 0.1411 | 0.1423 | 0.1482 | 0.1548 | 0.1523 | 0.1507 |
| 0.1566 | 0.1477 | 0.1484 | 0.1495 | 0.1578 | 0.1659 | 0.1708 | 0.1679 | 0.1644 |
| 0.1472 | 0.1372 | 0.1365 | 0.1343 | 0.1423 | 0.1449 | 0.1566 | 0.1544 | 0.1497 |
| 0.1882 | 0.1751 | 0.1717 | 0.1686 | 0.1809 | 0.1675 | 0.1792 | 0.1594 | 0.1443 |
| 0.2104 | 0.2136 | 0.1949 | 0.196  | 0.1881 | 0.1975 | 0.2153 | 0.1999 | 0.1875 |
| 0.1777 | 0.1626 | 0.156  | 0.1537 | 0.159  | 0.14   | 0.1389 | 0.1411 | 0.1306 |
| 0.1427 | 0.1309 | 0.1329 | 0.1329 | 0.1331 | 0.1319 | 0.1389 | 0.1429 | 0.132  |
| 0.1635 | 0.148  | 0.1515 | 0.1535 | 0.1613 | 0.1556 | 0.1616 | 0.1649 | 0.1509 |
| 0.1694 | 0.1593 | 0.1557 | 0.1632 | 0.168  | 0.1734 | 0.1755 | 0.1749 | 0.1675 |
| 0.1366 | 0.1317 | 0.1227 | 0.1165 | 0.1256 | 0.1256 | 0.1285 | 0.1309 | 0.1264 |
| 0.1486 | 0.1287 | 0.1304 | 0.1174 | 0.12   | 0.1291 | 0.1325 | 0.133  | 0.1301 |
| 0.2374 | 0.2096 | 0.2079 | 0.2148 | 0.2229 | 0.2071 | 0.2081 | 0.1936 | 0.1742 |
| 0.1927 | 0.1845 | 0.1622 | 0.1539 | 0.1686 | 0.1613 | 0.1667 | 0.1566 | 0.1487 |
| 0.1644 | 0.1508 | 0.135  | 0.1186 | 0.1112 | 0.098  | 0.0967 | 0.0926 | 0.0736 |
| 0.1509 | 0.1504 | 0.143  | 0.133  | 0.1377 | 0.1352 | 0.1368 | 0.1503 | 0.1458 |
| 0.1692 | 0.1647 | 0.1674 | 0.1682 | 0.1733 | 0.1799 | 0.1868 | 0.1866 | 0.19   |
| 0.1639 | 0.1621 | 0.1705 | 0.1717 | 0.1886 | 0.1934 | 0.204  | 0.1915 | 0.203  |
| 0.168  | 0.1551 | 0.1489 | 0.1418 | 0.1537 | 0.1459 | 0.1479 | 0.1452 | 0.1394 |
| 0.193  | 0.1922 | 0.1779 | 0.172  | 0.19   | 0.1768 | 0.1705 | 0.1542 | 0.1392 |
| 0.1487 | 0.134  | 0.1316 | 0.139  | 0.1482 | 0.1467 | 0.1498 | 0.1376 | 0.1248 |
| 0.1351 | 0.1291 | 0.1262 | 0.1262 | 0.1318 | 0.1291 | 0.1275 | 0.1235 | 0.1149 |
| 0.1622 | 0.1551 | 0.1502 | 0.1475 | 0.1499 | 0.1529 | 0.1546 | 0.1547 | 0.1495 |
| 0.181  | 0.168  | 0.1638 | 0.1602 | 0.1628 | 0.158  | 0.1597 | 0.159  | 0.1504 |
| 0.1231 | 0.1045 | 0.1034 | 0.1047 | 0.1192 | 0.1052 | 0.116  | 0.1103 | 0.1052 |
| 0.1881 | 0.1842 | 0.1802 | 0.1635 | 0.1678 | 0.1698 | 0.1677 | 0.1599 | 0.1419 |
| 0.2171 | 0.1947 | 0.1943 | 0.1858 | 0.1822 | 0.1698 | 0.1718 | 0.1587 | 0.1537 |
| 0.1451 | 0.1341 | 0.1397 | 0.147  | 0.137  | 0.1238 | 0.1339 | 0.1283 | 0.1161 |
| 0.15   | 0.1393 | 0.119  | 0.1136 | 0.1191 | 0.1206 | 0.1339 | 0.1304 | 0.1102 |
| 0.1733 | 0.1507 | 0.1393 | 0.1293 | 0.1302 | 0.1261 | 0.1429 | 0.1368 | 0.1136 |
| 0.1769 | 0.1603 | 0.1525 | 0.1558 | 0.1521 | 0.1389 | 0.1555 | 0.1374 | 0.1212 |
| 0.1711 | 0.1509 | 0.1517 | 0.139  | 0.1393 | 0.1303 | 0.1301 | 0.1223 | 0.1114 |
| 0.1146 | 0.1058 | 0.106  | 0.0932 | 0.1009 | 0.0979 | 0.1059 | 0.0935 | 0.0785 |
| 0.021  | 0.0194 | 0.0195 | 0.0185 | 0.0196 | 0.0165 | 0.0178 | 0.0172 | 0.0129 |
| 0.0297 | 0.0299 | 0.0285 | 0.0287 | 0.0291 | 0.0313 | 0.0287 | 0.0272 | 0.0271 |
| 0      | 0      | 0      | 0      | 0      | 0      | 0      | 0      | 0      |
| 0      | 0      | 0      | 0      | 0      | 0      | 0      | 0      | 0      |
| 0.0072 | 0.0071 | 0.0073 | 0.0075 | 0.0076 | 0.008  | 0.008  | 0.0079 | 0.008  |
| 0.0059 | 0.0059 | 0.006  | 0.006  | 0.006  | 0.0057 | 0.0056 | 0.0054 | 0.0049 |

|        |        |        |        |        |        |        |        |        |
|--------|--------|--------|--------|--------|--------|--------|--------|--------|
| 0.0118 | 0.0121 | 0.0109 | 0.0111 | 0.0112 | 0.0117 | 0.0115 | 0.0119 | 0.0122 |
| 0.016  | 0.0164 | 0.016  | 0.0158 | 0.0157 | 0.0165 | 0.0172 | 0.0167 | 0.015  |
| 0.0179 | 0.0189 | 0.0177 | 0.018  | 0.0178 | 0.019  | 0.0185 | 0.0177 | 0.017  |
| 0.0078 | 0.0082 | 0.0078 | 0.0075 | 0.0069 | 0.0072 | 0.0072 | 0.0069 | 0.0068 |
| 0.0129 | 0.0127 | 0.0122 | 0.0112 | 0.0108 | 0.0102 | 0.0108 | 0.0106 | 0.0111 |
| 0.0612 | 0.0582 | 0.0565 | 0.0556 | 0.0535 | 0.0542 | 0.0552 | 0.0536 | 0.0561 |
| 0.1312 | 0.1315 | 0.1278 | 0.1338 | 0.1306 | 0.1344 | 0.1346 | 0.1348 | 0.1377 |
| 0.11   | 0.1105 | 0.108  | 0.1113 | 0.1103 | 0.1094 | 0.112  | 0.1086 | 0.1057 |
| 0.1612 | 0.1564 | 0.1369 | 0.1227 | 0.1157 | 0.1016 | 0.1055 | 0.0964 | 0.0835 |
| 0.1588 | 0.1562 | 0.1584 | 0.1548 | 0.1608 | 0.155  | 0.1473 | 0.1437 | 0.1378 |
| 0.1595 | 0.1483 | 0.1435 | 0.1335 | 0.1413 | 0.1379 | 0.1404 | 0.1383 | 0.1291 |
| 0.1368 | 0.1247 | 0.1268 | 0.1271 | 0.1259 | 0.124  | 0.1325 | 0.1328 | 0.1224 |
| 0.154  | 0.1425 | 0.1392 | 0.1373 | 0.1415 | 0.1366 | 0.1457 | 0.1415 | 0.134  |
| 0.1741 | 0.1673 | 0.1684 | 0.168  | 0.1751 | 0.1784 | 0.1848 | 0.184  | 0.1796 |
| 0.161  | 0.153  | 0.1389 | 0.1325 | 0.149  | 0.1494 | 0.163  | 0.151  | 0.1406 |
| 0.1722 | 0.1531 | 0.1527 | 0.1412 | 0.1533 | 0.1417 | 0.1393 | 0.1313 | 0.1114 |
| 0.1779 | 0.1518 | 0.1565 | 0.1654 | 0.1594 | 0.152  | 0.1649 | 0.1632 | 0.1296 |
| 0.1454 | 0.1398 | 0.1409 | 0.1369 | 0.1445 | 0.1474 | 0.1571 | 0.1505 | 0.1368 |
| 0.1557 | 0.1516 | 0.144  | 0.1421 | 0.1503 | 0.1426 | 0.1391 | 0.1396 | 0.1322 |
| 0.2028 | 0.1872 | 0.1792 | 0.1798 | 0.1739 | 0.1621 | 0.1589 | 0.144  | 0.1357 |
| 0.1739 | 0.162  | 0.1545 | 0.1364 | 0.1457 | 0.1479 | 0.1551 | 0.1525 | 0.1431 |
| 0.1614 | 0.1439 | 0.14   | 0.1362 | 0.1462 | 0.1344 | 0.1357 | 0.1306 | 0.1164 |
| 0.1471 | 0.1412 | 0.1393 | 0.145  | 0.1568 | 0.1497 | 0.1592 | 0.1441 | 0.1245 |
| 0.1911 | 0.1779 | 0.1633 | 0.1516 | 0.1477 | 0.1534 | 0.1431 | 0.1316 | 0.118  |
| 0.1676 | 0.168  | 0.177  | 0.1577 | 0.1778 | 0.1742 | 0.1711 | 0.1603 | 0.1483 |
| 0.1546 | 0.1416 | 0.1221 | 0.1131 | 0.1306 | 0.1025 | 0.1135 | 0.114  | 0.0971 |
| 0.1471 | 0.1399 | 0.1277 | 0.115  | 0.1194 | 0.1135 | 0.1212 | 0.1227 | 0.105  |
| 0.1648 | 0.1598 | 0.1567 | 0.1522 | 0.1554 | 0.1544 | 0.1621 | 0.1617 | 0.153  |
| 0.1588 | 0.1572 | 0.1539 | 0.1599 | 0.1691 | 0.1826 | 0.1922 | 0.1865 | 0.1931 |
| 0.1275 | 0.122  | 0.124  | 0.1236 | 0.1255 | 0.1224 | 0.1258 | 0.1231 | 0.1164 |
| 0.1822 | 0.1593 | 0.1581 | 0.155  | 0.1581 | 0.1546 | 0.1693 | 0.1732 | 0.1555 |
| 0.1293 | 0.1155 | 0.1097 | 0.1195 | 0.126  | 0.1306 | 0.1354 | 0.129  | 0.1211 |
| 0.1531 | 0.1407 | 0.1358 | 0.125  | 0.1326 | 0.1244 | 0.1256 | 0.1151 | 0.1086 |
| 0.1837 | 0.1741 | 0.17   | 0.1639 | 0.1768 | 0.1716 | 0.1686 | 0.1602 | 0.1373 |
| 0.1862 | 0.1572 | 0.1405 | 0.1528 | 0.1603 | 0.1507 | 0.1654 | 0.1634 | 0.1335 |
| 0.15   | 0.1423 | 0.1317 | 0.1173 | 0.1298 | 0.1113 | 0.115  | 0.1186 | 0.1044 |
| 0.1634 | 0.1468 | 0.1509 | 0.1342 | 0.1193 | 0.096  | 0.1036 | 0.1046 | 0.0861 |
| 0.1216 | 0.0962 | 0.0895 | 0.0803 | 0.0812 | 0.0756 | 0.0724 | 0.071  | 0.0538 |
| 0.1249 | 0.1116 | 0.1138 | 0.1061 | 0.1114 | 0.1082 | 0.1086 | 0.1134 | 0.0895 |
| 0.1195 | 0.1073 | 0.1059 | 0.0888 | 0.0982 | 0.0971 | 0.112  | 0.1002 | 0.0863 |
| 0.1771 | 0.1578 | 0.1603 | 0.1504 | 0.1486 | 0.1379 | 0.1376 | 0.1353 | 0.1116 |
| 0.1963 | 0.1685 | 0.1615 | 0.1373 | 0.1372 | 0.1247 | 0.1286 | 0.1253 | 0.1142 |
| 0.2355 | 0.2211 | 0.2183 | 0.2119 | 0.2272 | 0.2083 | 0.2183 | 0.2052 | 0.173  |
| 0.1876 | 0.1794 | 0.1675 | 0.1529 | 0.1495 | 0.1344 | 0.143  | 0.1445 | 0.1303 |

|        |        |        |        |        |        |        |        |        |
|--------|--------|--------|--------|--------|--------|--------|--------|--------|
| 0.0371 | 0.0346 | 0.0309 | 0.0313 | 0.0297 | 0.0322 | 0.0323 | 0.0302 | 0.0283 |
| 0.0396 | 0.0405 | 0.0402 | 0.0421 | 0.0428 | 0.0447 | 0.046  | 0.0464 | 0.0457 |
| 0      | 0      | 0      | 0      | 0      | 0      | 0      | 0      | 0      |
| 0      | 0      | 0      | 0      | 0      | 0      | 0      | 0      | 0      |
| 0.0039 | 0.0038 | 0.0038 | 0.0037 | 0.0039 | 0.004  | 0.0042 | 0.0041 | 0.0039 |
| 0.0038 | 0.0038 | 0.0038 | 0.0038 | 0.004  | 0.0041 | 0.004  | 0.0041 | 0.0042 |
| 0.016  | 0.0161 | 0.0154 | 0.0158 | 0.0155 | 0.0162 | 0.015  | 0.0144 | 0.0151 |
| 0.0175 | 0.0182 | 0.0187 | 0.0178 | 0.0176 | 0.018  | 0.0176 | 0.018  | 0.0164 |
| 0.0068 | 0.0069 | 0.0069 | 0.0066 | 0.006  | 0.0061 | 0.0056 | 0.0055 | 0.0059 |
| 0.0047 | 0.0049 | 0.0051 | 0.0055 | 0.0057 | 0.0059 | 0.0058 | 0.0059 | 0.0061 |
| 0.0128 | 0.0132 | 0.0126 | 0.0124 | 0.0118 | 0.0118 | 0.0119 | 0.0112 | 0.0115 |
| 0.0424 | 0.0445 | 0.0439 | 0.0446 | 0.0435 | 0.0428 | 0.041  | 0.0387 | 0.0351 |
| 0.1294 | 0.1331 | 0.1251 | 0.1281 | 0.118  | 0.1241 | 0.1239 | 0.1205 | 0.1188 |
| 0.0988 | 0.0922 | 0.0866 | 0.0827 | 0.0837 | 0.0758 | 0.0798 | 0.0738 | 0.0678 |
| 0.1461 | 0.1394 | 0.1567 | 0.1494 | 0.1432 | 0.1367 | 0.1392 | 0.1377 | 0.1204 |
| 0.1873 | 0.1478 | 0.1283 | 0.1129 | 0.1224 | 0.1319 | 0.122  | 0.1069 | 0.0937 |
| 0.194  | 0.1819 | 0.1643 | 0.1536 | 0.1701 | 0.167  | 0.165  | 0.1646 | 0.1404 |
| 0.166  | 0.1424 | 0.1272 | 0.1083 | 0.1142 | 0.104  | 0.0986 | 0.0931 | 0.0964 |
| 0.1577 | 0.1489 | 0.1436 | 0.1357 | 0.1464 | 0.1495 | 0.1436 | 0.1413 | 0.1354 |
| 0.1532 | 0.1411 | 0.1403 | 0.1431 | 0.1495 | 0.1495 | 0.158  | 0.1541 | 0.1481 |
| 0.1902 | 0.1761 | 0.1597 | 0.1556 | 0.163  | 0.1703 | 0.1809 | 0.1885 | 0.1744 |
| 0.1397 | 0.1323 | 0.1382 | 0.1306 | 0.1217 | 0.1103 | 0.1201 | 0.1122 | 0.0994 |
| 0.1587 | 0.1431 | 0.1308 | 0.1344 | 0.1432 | 0.1482 | 0.1474 | 0.1381 | 0.1279 |
| 0.1399 | 0.1341 | 0.1329 | 0.1303 | 0.1422 | 0.1477 | 0.1575 | 0.1561 | 0.1517 |
| 0.1739 | 0.1682 | 0.168  | 0.1638 | 0.1647 | 0.1691 | 0.173  | 0.1671 | 0.1652 |
| 0.2295 | 0.2244 | 0.2081 | 0.202  | 0.1827 | 0.1864 | 0.1851 | 0.1909 | 0.184  |
| 0.1825 | 0.1697 | 0.1786 | 0.179  | 0.1692 | 0.1666 | 0.182  | 0.1845 | 0.1702 |
| 0.1656 | 0.1477 | 0.1418 | 0.1428 | 0.1436 | 0.1454 | 0.1487 | 0.1496 | 0.1278 |
| 0.1869 | 0.1667 | 0.1647 | 0.1648 | 0.1524 | 0.1391 | 0.1384 | 0.1497 | 0.1373 |
| 0.1739 | 0.1672 | 0.1592 | 0.1523 | 0.1526 | 0.1428 | 0.1329 | 0.1404 | 0.1097 |
| 0.167  | 0.1329 | 0.1226 | 0.1304 | 0.1388 | 0.1294 | 0.1277 | 0.1027 | 0.0962 |
| 0.1737 | 0.1511 | 0.1492 | 0.1372 | 0.1348 | 0.1099 | 0.0976 | 0.0796 | 0.079  |
| 0.1355 | 0.1119 | 0.1161 | 0.1059 | 0.1164 | 0.1036 | 0.1091 | 0.1061 | 0.0891 |
| 0.1556 | 0.1349 | 0.1333 | 0.1286 | 0.1393 | 0.1377 | 0.1422 | 0.1388 | 0.119  |
| 0.1705 | 0.1612 | 0.1632 | 0.1484 | 0.1476 | 0.1495 | 0.1581 | 0.1532 | 0.1388 |
| 0.154  | 0.1332 | 0.1311 | 0.1293 | 0.1391 | 0.1235 | 0.1297 | 0.1409 | 0.1341 |
| 0.1725 | 0.1605 | 0.1528 | 0.1439 | 0.1529 | 0.1509 | 0.1549 | 0.1514 | 0.1378 |
| 0.148  | 0.1401 | 0.1349 | 0.1316 | 0.1465 | 0.1426 | 0.1459 | 0.153  | 0.1439 |
| 0.1693 | 0.1591 | 0.1589 | 0.1588 | 0.1716 | 0.1735 | 0.1816 | 0.1721 | 0.1596 |
| 0.184  | 0.1745 | 0.1655 | 0.1532 | 0.1616 | 0.1567 | 0.1592 | 0.1468 | 0.1225 |
| 0.1089 | 0.0861 | 0.0815 | 0.0709 | 0.0857 | 0.092  | 0.108  | 0.1102 | 0.1057 |
| 0.1299 | 0.1105 | 0.1187 | 0.1147 | 0.1204 | 0.1126 | 0.1205 | 0.1168 | 0.1062 |
| 0.174  | 0.1509 | 0.1514 | 0.1446 | 0.1401 | 0.1347 | 0.1461 | 0.1291 | 0.1219 |
| 0.1222 | 0.1221 | 0.1171 | 0.1194 | 0.1228 | 0.1295 | 0.1293 | 0.1218 | 0.1084 |

|        |        |        |        |        |        |        |        |        |
|--------|--------|--------|--------|--------|--------|--------|--------|--------|
| 0.1377 | 0.1341 | 0.125  | 0.1217 | 0.1302 | 0.1179 | 0.1263 | 0.1215 | 0.1106 |
| 0.1428 | 0.1312 | 0.1295 | 0.1232 | 0.1235 | 0.1185 | 0.1207 | 0.1266 | 0.1116 |
| 0.1175 | 0.1129 | 0.1054 | 0.1009 | 0.1085 | 0.1031 | 0.1081 | 0.1069 | 0.1001 |
| 0.1751 | 0.1631 | 0.148  | 0.1343 | 0.132  | 0.1314 | 0.1253 | 0.1253 | 0.107  |
| 0.2446 | 0.22   | 0.2021 | 0.192  | 0.2048 | 0.2084 | 0.2071 | 0.2038 | 0.184  |
| 0.1607 | 0.157  | 0.1648 | 0.1514 | 0.1548 | 0.1536 | 0.1627 | 0.1538 | 0.1398 |
| 0.0279 | 0.0279 | 0.0273 | 0.0275 | 0.0268 | 0.0279 | 0.0271 | 0.0265 | 0.0251 |
| 0.037  | 0.0389 | 0.0372 | 0.0387 | 0.0378 | 0.0381 | 0.0391 | 0.0386 | 0.0351 |
| 0      | 0      | 0      | 0      | 0      | 0      | 0      | 0      | 0      |
| 0      | 0      | 0      | 0      | 0      | 0      | 0      | 0      | 0      |
| 0.0027 | 0.0025 | 0.0026 | 0.0024 | 0.0027 | 0.0027 | 0.0029 | 0.0029 | 0.0026 |
| 0      | 0      | 0      | 0      | 0      | 0      | 0      | 0      | 0      |
| 0.0087 | 0.0087 | 0.0091 | 0.0094 | 0.0095 | 0.01   | 0.0101 | 0.0101 | 0.0104 |
| 0.0096 | 0.0096 | 0.0092 | 0.0085 | 0.0085 | 0.0081 | 0.0079 | 0.0074 | 0.0072 |
| 0      | 0      | 0      | 0      | 0      | 0      | 0      | 0      | 0      |
| 0.0104 | 0.0102 | 0.0104 | 0.0102 | 0.0108 | 0.0106 | 0.0112 | 0.011  | 0.0108 |
| 0.0053 | 0.0051 | 0.0049 | 0.0047 | 0.0047 | 0.0043 | 0.0045 | 0.0044 | 0.0041 |
| 0.0322 | 0.0339 | 0.0328 | 0.0335 | 0.0352 | 0.0349 | 0.034  | 0.0315 | 0.0332 |
| 0.0671 | 0.0666 | 0.064  | 0.0634 | 0.0592 | 0.0612 | 0.0586 | 0.0589 | 0.0581 |
| 0.1387 | 0.1375 | 0.1323 | 0.1329 | 0.1324 | 0.1335 | 0.135  | 0.1309 | 0.129  |
| 0.1969 | 0.1821 | 0.1783 | 0.17   | 0.1731 | 0.1705 | 0.1799 | 0.1679 | 0.145  |
| 0.168  | 0.1585 | 0.1364 | 0.1426 | 0.1477 | 0.1291 | 0.1369 | 0.1268 | 0.1248 |
| 0.1714 | 0.1552 | 0.1507 | 0.139  | 0.1381 | 0.1322 | 0.1315 | 0.1138 | 0.09   |
| 0.1726 | 0.1451 | 0.141  | 0.1328 | 0.1383 | 0.1153 | 0.1225 | 0.1247 | 0.1018 |
| 0.1625 | 0.1541 | 0.1502 | 0.1368 | 0.1219 | 0.1152 | 0.12   | 0.1287 | 0.1054 |
| 0.1416 | 0.1389 | 0.1358 | 0.1326 | 0.1316 | 0.1273 | 0.132  | 0.1266 | 0.1169 |
| 0.1518 | 0.1398 | 0.1408 | 0.132  | 0.135  | 0.1391 | 0.1411 | 0.1374 | 0.1346 |
| 0.0965 | 0.086  | 0.085  | 0.078  | 0.0847 | 0.0886 | 0.094  | 0.0915 | 0.0839 |
| 0.1539 | 0.1509 | 0.1453 | 0.1426 | 0.1411 | 0.1434 | 0.1509 | 0.1465 | 0.1373 |
| 0.1508 | 0.1461 | 0.1522 | 0.1516 | 0.156  | 0.1611 | 0.1676 | 0.1673 | 0.163  |
| 0.1702 | 0.1633 | 0.1639 | 0.1645 | 0.1675 | 0.1677 | 0.1722 | 0.1722 | 0.1676 |
| 0.2329 | 0.2128 | 0.2054 | 0.1956 | 0.1917 | 0.1918 | 0.1754 | 0.1804 | 0.1662 |
| 0.2006 | 0.1884 | 0.1805 | 0.1611 | 0.1533 | 0.1357 | 0.1234 | 0.1116 | 0.0885 |
| 0.116  | 0.1134 | 0.1103 | 0.1076 | 0.1069 | 0.1001 | 0.115  | 0.1239 | 0.1035 |
| 0.1979 | 0.1831 | 0.1643 | 0.1427 | 0.1305 | 0.1296 | 0.1261 | 0.1231 | 0.0931 |
| 0.1474 | 0.1283 | 0.1236 | 0.1259 | 0.1353 | 0.1313 | 0.1308 | 0.1318 | 0.1209 |
| 0.1434 | 0.1333 | 0.1338 | 0.1305 | 0.1352 | 0.1303 | 0.1381 | 0.1324 | 0.1175 |
| 0.1999 | 0.1864 | 0.185  | 0.178  | 0.1806 | 0.1824 | 0.1723 | 0.1635 | 0.1542 |
| 0.132  | 0.136  | 0.1312 | 0.1303 | 0.1461 | 0.1449 | 0.1522 | 0.1578 | 0.1202 |
| 0.1439 | 0.1375 | 0.1444 | 0.1316 | 0.1394 | 0.1273 | 0.1307 | 0.1419 | 0.1226 |
| 0.1805 | 0.1587 | 0.1585 | 0.1525 | 0.1652 | 0.1467 | 0.1626 | 0.1508 | 0.1387 |
| 0.1366 | 0.1319 | 0.1332 | 0.123  | 0.112  | 0.1033 | 0.1029 | 0.0976 | 0.0947 |
| 0.14   | 0.1266 | 0.1116 | 0.0927 | 0.1074 | 0.0961 | 0.1031 | 0.1005 | 0.09   |
| 0.1676 | 0.1613 | 0.1562 | 0.1523 | 0.1582 | 0.1527 | 0.1577 | 0.1515 | 0.1446 |

|        |        |        |        |        |        |        |        |        |
|--------|--------|--------|--------|--------|--------|--------|--------|--------|
| 0.1639 | 0.1515 | 0.1539 | 0.154  | 0.1604 | 0.1652 | 0.1734 | 0.174  | 0.1746 |
| 0.1556 | 0.1458 | 0.1495 | 0.1467 | 0.1531 | 0.1562 | 0.1635 | 0.1574 | 0.1516 |
| 0.1377 | 0.1225 | 0.1021 | 0.0941 | 0.1043 | 0.1077 | 0.1268 | 0.1175 | 0.111  |
| 0.1766 | 0.1564 | 0.1446 | 0.1377 | 0.1449 | 0.1497 | 0.1519 | 0.1392 | 0.1285 |
| 0.175  | 0.1802 | 0.1643 | 0.163  | 0.1632 | 0.1438 | 0.1514 | 0.1542 | 0.1468 |
| 0.1655 | 0.1483 | 0.1269 | 0.1176 | 0.1167 | 0.1101 | 0.1217 | 0.1205 | 0.1227 |
| 0.1451 | 0.1208 | 0.1293 | 0.1216 | 0.127  | 0.1081 | 0.1148 | 0.1233 | 0.1064 |
| 0.1363 | 0.1378 | 0.1347 | 0.1304 | 0.1335 | 0.1338 | 0.1336 | 0.1305 | 0.1179 |
| 0.1749 | 0.1546 | 0.1424 | 0.1261 | 0.134  | 0.1185 | 0.116  | 0.1057 | 0.0957 |
| 0.1583 | 0.1375 | 0.1399 | 0.133  | 0.1269 | 0.1217 | 0.1164 | 0.1098 | 0.1048 |
| 0.1685 | 0.1395 | 0.1277 | 0.1182 | 0.1273 | 0.117  | 0.1242 | 0.138  | 0.1244 |
| 0.1315 | 0.1147 | 0.1074 | 0.0995 | 0.097  | 0.0905 | 0.0911 | 0.0859 | 0.0683 |
| 0.0089 | 0.0083 | 0.0079 | 0.007  | 0.0069 | 0.0071 | 0.0069 | 0.0069 | 0.0062 |
| 0.0423 | 0.0409 | 0.0417 | 0.0417 | 0.042  | 0.0418 | 0.0425 | 0.0408 | 0.0428 |
| 0      | 0      | 0      | 0      | 0      | 0      | 0      | 0      | 0      |
| 0      | 0      | 0      | 0      | 0      | 0      | 0      | 0      | 0      |
| 0      | 0      | 0      | 0      | 0      | 0      | 0      | 0      | 0      |
| 0      | 0      | 0      | 0      | 0      | 0      | 0      | 0      | 0      |
| 0      | 0      | 0      | 0      | 0      | 0      | 0      | 0      | 0      |
| 0      | 0      | 0      | 0      | 0      | 0      | 0      | 0      | 0      |
| 0      | 0      | 0      | 0      | 0      | 0      | 0      | 0      | 0      |
| 0      | 0      | 0      | 0      | 0      | 0      | 0      | 0      | 0      |
| 0      | 0      | 0      | 0      | 0      | 0      | 0      | 0      | 0      |
| 0.0016 | 0.0016 | 0.0017 | 0.0018 | 0.002  | 0.0022 | 0.0023 | 0.0024 | 0.0025 |
| 0.0409 | 0.0392 | 0.038  | 0.037  | 0.0379 | 0.0367 | 0.0368 | 0.0349 | 0.0315 |
| 0.1047 | 0.1004 | 0.0924 | 0.0864 | 0.0898 | 0.0888 | 0.0938 | 0.0896 | 0.083  |
| 0.309  | 0.3053 | 0.295  | 0.2957 | 0.2908 | 0.2809 | 0.2885 | 0.2734 | 0.2604 |
| 0.2104 | 0.2027 | 0.1871 | 0.1642 | 0.1655 | 0.1639 | 0.1697 | 0.1699 | 0.1665 |
| 0.1128 | 0.1027 | 0.1006 | 0.0989 | 0.091  | 0.0865 | 0.0899 | 0.1014 | 0.0788 |
| 0.1654 | 0.1652 | 0.154  | 0.1598 | 0.1557 | 0.1439 | 0.1461 | 0.1416 | 0.1296 |
| 0.1502 | 0.1455 | 0.1474 | 0.1421 | 0.1496 | 0.1285 | 0.132  | 0.1264 | 0.1173 |
| 0.1492 | 0.1368 | 0.1382 | 0.1371 | 0.1405 | 0.1427 | 0.1468 | 0.1481 | 0.1401 |
| 0.125  | 0.1148 | 0.1149 | 0.1111 | 0.1211 | 0.1217 | 0.127  | 0.1272 | 0.1206 |
| 0.1344 | 0.1283 | 0.1327 | 0.1331 | 0.141  | 0.1443 | 0.1481 | 0.1519 | 0.1495 |
| 0.1512 | 0.146  | 0.1449 | 0.1485 | 0.1549 | 0.1586 | 0.1622 | 0.1598 | 0.1553 |
| 0.1341 | 0.1184 | 0.1133 | 0.1121 | 0.1239 | 0.1229 | 0.1218 | 0.1201 | 0.1127 |
| 0.2005 | 0.1799 | 0.1658 | 0.1685 | 0.1804 | 0.1777 | 0.185  | 0.1693 | 0.1612 |
| 0.2146 | 0.1962 | 0.1799 | 0.1689 | 0.1711 | 0.1741 | 0.1742 | 0.1592 | 0.1342 |
| 0.1637 | 0.1548 | 0.1499 | 0.1463 | 0.1472 | 0.1484 | 0.161  | 0.153  | 0.1454 |
| 0.1407 | 0.1372 | 0.1387 | 0.1382 | 0.1402 | 0.1442 | 0.1484 | 0.148  | 0.1468 |
| 0.1476 | 0.1427 | 0.1463 | 0.1468 | 0.1524 | 0.1568 | 0.1628 | 0.1723 | 0.1754 |
| 0.1409 | 0.137  | 0.1355 | 0.1326 | 0.1336 | 0.1347 | 0.1424 | 0.1385 | 0.1323 |
| 0.1774 | 0.1751 | 0.1663 | 0.1602 | 0.1728 | 0.158  | 0.1632 | 0.1581 | 0.1399 |

|        |        |        |        |        |        |        |        |        |
|--------|--------|--------|--------|--------|--------|--------|--------|--------|
| 0.2181 | 0.2068 | 0.195  | 0.1746 | 0.1788 | 0.1568 | 0.1325 | 0.1208 | 0.116  |
| 0.1763 | 0.1484 | 0.1511 | 0.1409 | 0.1385 | 0.1331 | 0.1388 | 0.152  | 0.1356 |
| 0.1791 | 0.1692 | 0.1435 | 0.1401 | 0.1395 | 0.1247 | 0.1212 | 0.1253 | 0.1083 |
| 0.1793 | 0.1465 | 0.1445 | 0.1324 | 0.1612 | 0.1446 | 0.1273 | 0.1267 | 0.1119 |
| 0.1869 | 0.1661 | 0.144  | 0.1339 | 0.1421 | 0.1563 | 0.146  | 0.1333 | 0.1046 |
| 0.1684 | 0.1558 | 0.1552 | 0.1536 | 0.1578 | 0.1592 | 0.1583 | 0.1531 | 0.1512 |
| 0.1813 | 0.1745 | 0.1794 | 0.1855 | 0.194  | 0.1964 | 0.2005 | 0.2067 | 0.2076 |
| 0.1524 | 0.15   | 0.1521 | 0.1493 | 0.1566 | 0.1608 | 0.1663 | 0.1662 | 0.1637 |
| 0.1484 | 0.1279 | 0.1141 | 0.0989 | 0.1025 | 0.1026 | 0.1139 | 0.1076 | 0.0983 |
| 0.1354 | 0.1216 | 0.1218 | 0.1239 | 0.1202 | 0.1112 | 0.0894 | 0.083  | 0.0691 |
| 0.1865 | 0.185  | 0.1704 | 0.1727 | 0.1645 | 0.1589 | 0.1536 | 0.1329 | 0.116  |
| 0.0941 | 0.0795 | 0.0783 | 0.0692 | 0.07   | 0.0726 | 0.0911 | 0.0966 | 0.0793 |
| 0.1801 | 0.1695 | 0.1693 | 0.1635 | 0.1639 | 0.1485 | 0.149  | 0.14   | 0.1198 |
| 0.1263 | 0.1047 | 0.0995 | 0.0956 | 0.1017 | 0.0955 | 0.1015 | 0.0942 | 0.0846 |
| 0.1742 | 0.1555 | 0.1569 | 0.1631 | 0.1553 | 0.1387 | 0.1413 | 0.133  | 0.1054 |
| 0.2385 | 0.211  | 0.1941 | 0.1752 | 0.1916 | 0.1884 | 0.206  | 0.2202 | 0.1933 |
| 0.1788 | 0.1759 | 0.1769 | 0.164  | 0.1693 | 0.1613 | 0.1609 | 0.1482 | 0.1344 |
| 0.0355 | 0.0324 | 0.0305 | 0.0302 | 0.0288 | 0.0283 | 0.0292 | 0.0295 | 0.0249 |
| 0.0863 | 0.0897 | 0.0861 | 0.0866 | 0.0803 | 0.0815 | 0.0829 | 0.08   | 0.0832 |
| 0.2488 | 0.2452 | 0.2379 | 0.2186 | 0.2081 | 0.2326 | 0.2263 | 0.2096 | 0.2184 |
| 0.0482 | 0.0512 | 0.0459 | 0.0445 | 0.0404 | 0.0406 | 0.0392 | 0.037  | 0.04   |
| 0.0218 | 0.0225 | 0.0206 | 0.022  | 0.0199 | 0.0198 | 0.0186 | 0.0185 | 0.0191 |
| 0      | 0      | 0      | 0      | 0      | 0      | 0      | 0      | 0      |
| 0      | 0      | 0      | 0      | 0      | 0      | 0      | 0      | 0      |
| 0      | 0      | 0      | 0      | 0      | 0      | 0      | 0      | 0      |
| 0      | 0      | 0      | 0      | 0      | 0      | 0      | 0      | 0      |
| 0      | 0      | 0      | 0      | 0      | 0      | 0      | 0      | 0      |
| 0      | 0      | 0      | 0      | 0      | 0      | 0      | 0      | 0      |
| 0      | 0      | 0      | 0      | 0      | 0      | 0      | 0      | 0      |
| 0      | 0      | 0      | 0      | 0      | 0      | 0      | 0      | 0      |
| 0      | 0      | 0      | 0      | 0      | 0      | 0      | 0      | 0      |
| 0.0228 | 0.0228 | 0.0232 | 0.0238 | 0.0217 | 0.0224 | 0.0236 | 0.0224 | 0.0233 |
| 0.0846 | 0.0837 | 0.0813 | 0.0802 | 0.0754 | 0.0776 | 0.079  | 0.0808 | 0.0765 |
| 0.3985 | 0.4085 | 0.3936 | 0.3772 | 0.3564 | 0.3803 | 0.3587 | 0.3555 | 0.3472 |
| 0.4238 | 0.417  | 0.3799 | 0.3739 | 0.3489 | 0.3655 | 0.3633 | 0.3819 | 0.3785 |
| 0.1777 | 0.1772 | 0.1704 | 0.1577 | 0.1576 | 0.1452 | 0.1537 | 0.149  | 0.1403 |
| 0.1764 | 0.155  | 0.1424 | 0.14   | 0.1473 | 0.1443 | 0.1617 | 0.1608 | 0.1447 |
| 0.1689 | 0.149  | 0.1559 | 0.1389 | 0.1359 | 0.1404 | 0.1505 | 0.14   | 0.1229 |
| 0.1993 | 0.1777 | 0.1755 | 0.1619 | 0.1605 | 0.1557 | 0.1568 | 0.1527 | 0.1405 |
| 0.2037 | 0.1946 | 0.1917 | 0.183  | 0.1782 | 0.1842 | 0.1895 | 0.1837 | 0.1708 |
| 0.1704 | 0.16   | 0.1652 | 0.1625 | 0.1667 | 0.1693 | 0.1758 | 0.1757 | 0.176  |
| 0.1233 | 0.1141 | 0.1136 | 0.1082 | 0.1159 | 0.1138 | 0.1211 | 0.1188 | 0.1108 |
| 0.1777 | 0.1421 | 0.1315 | 0.1244 | 0.121  | 0.1237 | 0.135  | 0.1291 | 0.1157 |
| 0.1592 | 0.1378 | 0.1457 | 0.1418 | 0.1497 | 0.1409 | 0.1324 | 0.14   | 0.1049 |

|        |        |        |        |        |        |        |        |        |
|--------|--------|--------|--------|--------|--------|--------|--------|--------|
| 0.1046 | 0.0905 | 0.0916 | 0.0898 | 0.0985 | 0.0973 | 0.1131 | 0.1146 | 0.0963 |
| 0.1541 | 0.144  | 0.1446 | 0.1431 | 0.1514 | 0.1549 | 0.1658 | 0.1576 | 0.147  |
| 0.1733 | 0.1679 | 0.1709 | 0.1719 | 0.1805 | 0.1846 | 0.1898 | 0.1867 | 0.1881 |
| 0.1755 | 0.1695 | 0.1823 | 0.1843 | 0.1945 | 0.2052 | 0.2135 | 0.2069 | 0.213  |
| 0.1627 | 0.1523 | 0.1541 | 0.1508 | 0.161  | 0.1619 | 0.1664 | 0.1615 | 0.1567 |
| 0.1461 | 0.1339 | 0.1373 | 0.1383 | 0.1395 | 0.1296 | 0.1224 | 0.1106 | 0.0969 |
| 0.1645 | 0.1504 | 0.1441 | 0.1455 | 0.1452 | 0.1459 | 0.1546 | 0.1491 | 0.1312 |
| 0.1815 | 0.1488 | 0.152  | 0.1442 | 0.1385 | 0.1441 | 0.1342 | 0.1229 | 0.1117 |
| 0.1657 | 0.1467 | 0.1462 | 0.1293 | 0.1443 | 0.1256 | 0.1209 | 0.1379 | 0.1289 |
| 0.1813 | 0.1563 | 0.1332 | 0.1133 | 0.1102 | 0.1015 | 0.1126 | 0.0943 | 0.087  |
| 0.1394 | 0.1149 | 0.1139 | 0.1082 | 0.1166 | 0.1212 | 0.1155 | 0.1067 | 0.0917 |
| 0.1488 | 0.1436 | 0.1363 | 0.1326 | 0.1368 | 0.1387 | 0.142  | 0.1452 | 0.1355 |
| 0.1669 | 0.1621 | 0.1619 | 0.1597 | 0.1613 | 0.1606 | 0.1687 | 0.1669 | 0.1632 |
| 0.1751 | 0.1651 | 0.1612 | 0.1558 | 0.17   | 0.1698 | 0.1771 | 0.1764 | 0.1686 |
| 0.1934 | 0.1762 | 0.1732 | 0.1728 | 0.171  | 0.1623 | 0.1918 | 0.1715 | 0.1343 |
| 0.178  | 0.162  | 0.1575 | 0.1573 | 0.1484 | 0.1454 | 0.1573 | 0.1476 | 0.1421 |
| 0.1719 | 0.1733 | 0.1424 | 0.1466 | 0.1389 | 0.1354 | 0.1456 | 0.1508 | 0.1333 |
| 0.2097 | 0.193  | 0.186  | 0.1744 | 0.1746 | 0.1705 | 0.1741 | 0.167  | 0.1696 |
| 0.1168 | 0.0935 | 0.0941 | 0.0938 | 0.1084 | 0.0982 | 0.0925 | 0.0853 | 0.0711 |
| 0.1982 | 0.1856 | 0.1747 | 0.1617 | 0.1449 | 0.1178 | 0.1178 | 0.1232 | 0.1143 |
| 0.1782 | 0.1669 | 0.1752 | 0.1718 | 0.1675 | 0.1791 | 0.1771 | 0.1636 | 0.1549 |
| 0.2458 | 0.2364 | 0.2306 | 0.2046 | 0.2139 | 0.1954 | 0.1853 | 0.1625 | 0.1454 |
| 0.1458 | 0.1258 | 0.1151 | 0.1196 | 0.1163 | 0.1075 | 0.1117 | 0.1033 | 0.0853 |
| 0.0706 | 0.0706 | 0.0702 | 0.0689 | 0.0677 | 0.0642 | 0.0601 | 0.0618 | 0.0612 |
| 0.2754 | 0.285  | 0.2763 | 0.2726 | 0.2354 | 0.2318 | 0.2227 | 0.2226 | 0.2211 |
| 0.4968 | 0.4744 | 0.4536 | 0.4559 | 0.4543 | 0.4778 | 0.4668 | 0.4345 | 0.4203 |
| 0.0326 | 0.0301 | 0.0294 | 0.0304 | 0.0279 | 0.0274 | 0.0269 | 0.0274 | 0.0281 |
| 0.0119 | 0.0123 | 0.013  | 0.0131 | 0.0122 | 0.0132 | 0.0124 | 0.0123 | 0.0139 |
| 0      | 0      | 0      | 0      | 0      | 0      | 0      | 0      | 0      |
| 0      | 0      | 0      | 0      | 0      | 0      | 0      | 0      | 0      |
| 0      | 0      | 0      | 0      | 0      | 0      | 0      | 0      | 0      |
| 0      | 0      | 0      | 0      | 0      | 0      | 0      | 0      | 0      |
| 0      | 0      | 0      | 0      | 0      | 0      | 0      | 0      | 0      |
| 0      | 0      | 0      | 0      | 0      | 0      | 0      | 0      | 0      |
| 0      | 0      | 0      | 0      | 0      | 0      | 0      | 0      | 0      |
| 0      | 0      | 0      | 0      | 0      | 0      | 0      | 0      | 0      |
| 0.0252 | 0.0252 | 0.0244 | 0.0242 | 0.0225 | 0.0225 | 0.0215 | 0.0223 | 0.022  |
| 0.0422 | 0.0461 | 0.0457 | 0.0422 | 0.0358 | 0.0406 | 0.0414 | 0.0423 | 0.0435 |
| 0.0176 | 0.0174 | 0.0176 | 0.0165 | 0.0165 | 0.0165 | 0.0156 | 0.015  | 0.0153 |
| 0.2782 | 0.2814 | 0.27   | 0.2925 | 0.2836 | 0.2644 | 0.2686 | 0.2607 | 0.2578 |
| 0.3818 | 0.4057 | 0.3774 | 0.4199 | 0.4118 | 0.4065 | 0.3975 | 0.3782 | 0.3876 |
| 0.1707 | 0.1636 | 0.1412 | 0.1432 | 0.1305 | 0.1272 | 0.1264 | 0.1264 | 0.1283 |
| 0.1736 | 0.1618 | 0.1671 | 0.1627 | 0.1713 | 0.1628 | 0.1586 | 0.1482 | 0.1296 |
| 0.1923 | 0.1755 | 0.1583 | 0.1674 | 0.1695 | 0.159  | 0.16   | 0.1536 | 0.1518 |



|        |        |        |        |        |        |        |        |        |
|--------|--------|--------|--------|--------|--------|--------|--------|--------|
| 0.1424 | 0.1443 | 0.1319 | 0.1205 | 0.126  | 0.1109 | 0.1161 | 0.1084 | 0.0975 |
| 0.1533 | 0.1367 | 0.1413 | 0.1425 | 0.1343 | 0.1232 | 0.1306 | 0.1202 | 0.1059 |
| 0.1949 | 0.1782 | 0.1668 | 0.1591 | 0.1648 | 0.1538 | 0.1718 | 0.1532 | 0.1381 |
| 0.1928 | 0.1748 | 0.1644 | 0.1559 | 0.151  | 0.14   | 0.1353 | 0.1248 | 0.1089 |
| 0.1741 | 0.1424 | 0.1361 | 0.1443 | 0.1526 | 0.1415 | 0.1349 | 0.1187 | 0.1098 |
| 0.1512 | 0.1461 | 0.147  | 0.1473 | 0.1493 | 0.1527 | 0.1554 | 0.1532 | 0.1504 |
| 0.1478 | 0.1546 | 0.1591 | 0.1604 | 0.1639 | 0.1683 | 0.1744 | 0.1788 | 0.177  |
| 0.1956 | 0.1908 | 0.1934 | 0.1927 | 0.1973 | 0.2015 | 0.208  | 0.2051 | 0.2081 |
| 0.1837 | 0.1729 | 0.1802 | 0.1846 | 0.1869 | 0.1972 | 0.1981 | 0.2008 | 0.1947 |
| 0.1697 | 0.1628 | 0.1719 | 0.1725 | 0.1772 | 0.1866 | 0.1896 | 0.1859 | 0.1861 |
| 0.1467 | 0.1393 | 0.1365 | 0.1277 | 0.1317 | 0.1389 | 0.1356 | 0.1278 | 0.1171 |
| 0.1753 | 0.1626 | 0.1598 | 0.1545 | 0.1539 | 0.1529 | 0.1412 | 0.1527 | 0.1378 |
| 0.1409 | 0.1262 | 0.1273 | 0.1213 | 0.11   | 0.1124 | 0.1248 | 0.1102 | 0.095  |
| 0.2068 | 0.1816 | 0.1899 | 0.1745 | 0.1758 | 0.161  | 0.1841 | 0.1903 | 0.1683 |
| 0.2216 | 0.2015 | 0.2075 | 0.1887 | 0.1813 | 0.1604 | 0.1662 | 0.1481 | 0.135  |
| 0.1746 | 0.1572 | 0.1689 | 0.1529 | 0.1601 | 0.1572 | 0.1647 | 0.1559 | 0.1413 |
| 0.1501 | 0.1477 | 0.1381 | 0.1376 | 0.1273 | 0.1234 | 0.1357 | 0.1396 | 0.1243 |
| 0.1565 | 0.1485 | 0.1488 | 0.145  | 0.146  | 0.1427 | 0.1502 | 0.1453 | 0.127  |
| 0.1447 | 0.1266 | 0.1275 | 0.1293 | 0.1382 | 0.1323 | 0.1377 | 0.1406 | 0.1222 |
| 0.2194 | 0.2161 | 0.1959 | 0.1966 | 0.1951 | 0.1879 | 0.2033 | 0.1897 | 0.1778 |
| 0.1506 | 0.1495 | 0.1413 | 0.1239 | 0.1405 | 0.1273 | 0.1351 | 0.1277 | 0.1272 |
| 0.1555 | 0.1429 | 0.1587 | 0.153  | 0.1571 | 0.1411 | 0.1436 | 0.131  | 0.1085 |
| 0.1398 | 0.1199 | 0.1143 | 0.0869 | 0.1063 | 0.1064 | 0.1086 | 0.1085 | 0.0965 |
| 0.1692 | 0.1645 | 0.1628 | 0.1497 | 0.1551 | 0.1386 | 0.1427 | 0.1419 | 0.1267 |
| 0.1586 | 0.1307 | 0.1306 | 0.1193 | 0.1125 | 0.1002 | 0.0982 | 0.1031 | 0.0989 |
| 0.2215 | 0.2045 | 0.2034 | 0.1999 | 0.1912 | 0.1741 | 0.171  | 0.1801 | 0.1561 |
| 0.2005 | 0.193  | 0.1835 | 0.1839 | 0.1889 | 0.1935 | 0.1767 | 0.1671 | 0.1475 |
| 0.1731 | 0.1384 | 0.1314 | 0.1154 | 0.1254 | 0.135  | 0.1414 | 0.1264 | 0.1032 |
| 0.1289 | 0.1098 | 0.1153 | 0.1051 | 0.101  | 0.0984 | 0.1022 | 0.1032 | 0.0912 |
| 0.097  | 0.0963 | 0.0982 | 0.0938 | 0.0893 | 0.0932 | 0.0885 | 0.0879 | 0.0812 |
| 0.1565 | 0.1578 | 0.1502 | 0.1519 | 0.1355 | 0.1335 | 0.1219 | 0.1108 | 0.1208 |
| 0.101  | 0.0968 | 0.099  | 0.1058 | 0.1064 | 0.1208 | 0.1301 | 0.1296 | 0.1273 |
| 0.0234 | 0.025  | 0.0254 | 0.0257 | 0.0248 | 0.0256 | 0.024  | 0.0232 | 0.0223 |
| 0.0081 | 0.0075 | 0.0069 | 0.0073 | 0.0074 | 0.0075 | 0.0079 | 0.0077 | 0.0073 |
| 0      | 0      | 0      | 0      | 0      | 0      | 0      | 0      | 0      |
| 0      | 0      | 0      | 0      | 0      | 0      | 0      | 0      | 0      |
| 0      | 0      | 0      | 0      | 0      | 0      | 0      | 0      | 0      |
| 0      | 0      | 0      | 0      | 0      | 0      | 0      | 0      | 0      |
| 0      | 0      | 0      | 0      | 0      | 0      | 0      | 0      | 0      |
| 0      | 0      | 0      | 0      | 0      | 0      | 0      | 0      | 0      |
| 0      | 0      | 0      | 0      | 0      | 0      | 0      | 0      | 0      |
| 0      | 0      | 0      | 0      | 0      | 0      | 0      | 0      | 0      |
| 0.0063 | 0.0058 | 0.0059 | 0.0059 | 0.0062 | 0.0063 | 0.0067 | 0.0064 | 0.0063 |
| 0.0545 | 0.0572 | 0.0571 | 0.0571 | 0.0555 | 0.0562 | 0.0503 | 0.046  | 0.0444 |



|        |        |        |        |        |        |        |        |        |
|--------|--------|--------|--------|--------|--------|--------|--------|--------|
| 0      | 0      | 0      | 0      | 0      | 0      | 0      | 0      | 0      |
| 0      | 0      | 0      | 0      | 0      | 0      | 0      | 0      | 0      |
| 0      | 0      | 0      | 0      | 0      | 0      | 0      | 0      | 0      |
| 0      | 0      | 0      | 0      | 0      | 0      | 0      | 0      | 0      |
| 0.0008 | 0.0009 | 0.0009 | 0.0009 | 0.001  | 0.0011 | 0.0012 | 0.0011 | 0.0011 |
| 0.0423 | 0.0441 | 0.0454 | 0.0449 | 0.0428 | 0.0432 | 0.0421 | 0.0409 | 0.0411 |
| 0.0034 | 0.0033 | 0.0033 | 0.0031 | 0.0028 | 0.003  | 0.0029 | 0.0032 | 0.0031 |
| 0.0143 | 0.0145 | 0.0148 | 0.0154 | 0.0163 | 0.0159 | 0.0167 | 0.0166 | 0.0172 |
| 0.1232 | 0.119  | 0.1175 | 0.1188 | 0.1222 | 0.1249 | 0.1298 | 0.1292 | 0.1271 |
| 0.1617 | 0.1495 | 0.1482 | 0.1422 | 0.1467 | 0.151  | 0.1567 | 0.1545 | 0.1527 |
| 0.1661 | 0.1571 | 0.1545 | 0.1511 | 0.1564 | 0.1587 | 0.1602 | 0.1598 | 0.1565 |
| 0.158  | 0.1518 | 0.1521 | 0.1562 | 0.1652 | 0.1712 | 0.1806 | 0.18   | 0.1854 |
| 0.1847 | 0.1733 | 0.1675 | 0.1682 | 0.1722 | 0.1776 | 0.18   | 0.1741 | 0.1668 |
| 0.1464 | 0.1381 | 0.1427 | 0.1351 | 0.1403 | 0.1263 | 0.1279 | 0.1308 | 0.1234 |
| 0.1497 | 0.1352 | 0.1347 | 0.1307 | 0.1344 | 0.1287 | 0.1333 | 0.1363 | 0.1287 |
| 0.1568 | 0.153  | 0.1562 | 0.1566 | 0.1628 | 0.1674 | 0.1724 | 0.1725 | 0.1743 |
| 0.184  | 0.1819 | 0.1839 | 0.1843 | 0.1865 | 0.1932 | 0.1968 | 0.1937 | 0.2012 |
| 0.1747 | 0.1685 | 0.169  | 0.1736 | 0.1795 | 0.1852 | 0.1925 | 0.1937 | 0.1917 |
| 0.1546 | 0.1436 | 0.1561 | 0.1571 | 0.1678 | 0.1652 | 0.1754 | 0.1795 | 0.1721 |
| 0.1925 | 0.1982 | 0.2132 | 0.205  | 0.2226 | 0.2248 | 0.2234 | 0.2225 | 0.2414 |
| 0.1837 | 0.1723 | 0.1816 | 0.1956 | 0.2054 | 0.2333 | 0.2519 | 0.2678 | 0.2726 |
| 0.1815 | 0.1769 | 0.1745 | 0.1711 | 0.1823 | 0.1888 | 0.1967 | 0.1957 | 0.1988 |
| 0.1672 | 0.1441 | 0.1387 | 0.1344 | 0.1432 | 0.1381 | 0.1374 | 0.1347 | 0.1342 |
| 0.1613 | 0.1601 | 0.1575 | 0.1351 | 0.1341 | 0.1295 | 0.1348 | 0.1255 | 0.1149 |
| 0.2134 | 0.2033 | 0.2023 | 0.194  | 0.1999 | 0.1689 | 0.1681 | 0.1577 | 0.1249 |
| 0.2351 | 0.2066 | 0.19   | 0.1858 | 0.198  | 0.2137 | 0.214  | 0.1939 | 0.1662 |
| 0.2538 | 0.2468 | 0.2544 | 0.2401 | 0.2285 | 0.2224 | 0.2112 | 0.1969 | 0.1807 |
| 0.1704 | 0.1591 | 0.1552 | 0.1524 | 0.1674 | 0.1677 | 0.1809 | 0.1666 | 0.1614 |
| 0.1356 | 0.1382 | 0.131  | 0.121  | 0.1329 | 0.1162 | 0.1232 | 0.1101 | 0.0957 |
| 0.1969 | 0.1619 | 0.1562 | 0.1556 | 0.1593 | 0.1611 | 0.1605 | 0.1576 | 0.1289 |
| 0.171  | 0.1466 | 0.1351 | 0.111  | 0.122  | 0.1159 | 0.1145 | 0.1294 | 0.1009 |
| 0.1205 | 0.1117 | 0.0878 | 0.0739 | 0.0689 | 0.074  | 0.0933 | 0.1152 | 0.1026 |
| 0.1901 | 0.171  | 0.1578 | 0.154  | 0.1488 | 0.1311 | 0.1288 | 0.1226 | 0.1012 |
| 0.1853 | 0.1617 | 0.1483 | 0.1322 | 0.1415 | 0.1425 | 0.1469 | 0.1249 | 0.1233 |
| 0.1686 | 0.1472 | 0.1254 | 0.1174 | 0.1237 | 0.1134 | 0.1328 | 0.1305 | 0.1037 |
| 0.1474 | 0.1442 | 0.1502 | 0.1387 | 0.1392 | 0.1509 | 0.1728 | 0.1721 | 0.1606 |
| 0.1705 | 0.1398 | 0.1252 | 0.1184 | 0.126  | 0.1115 | 0.1154 | 0.1095 | 0.0898 |
| 0.1752 | 0.1662 | 0.1434 | 0.1405 | 0.1403 | 0.1386 | 0.1447 | 0.1299 | 0.1243 |
| 0.192  | 0.1722 | 0.1557 | 0.1445 | 0.1381 | 0.1403 | 0.1458 | 0.1385 | 0.1261 |
| 0.0436 | 0.0433 | 0.04   | 0.0402 | 0.0408 | 0.04   | 0.0442 | 0.0421 | 0.0377 |
| 0.035  | 0.0375 | 0.0383 | 0.0428 | 0.0444 | 0.0497 | 0.0462 | 0.0465 | 0.0475 |
| 0.1067 | 0.1125 | 0.1014 | 0.0978 | 0.0901 | 0.1004 | 0.0906 | 0.0896 | 0.0945 |
| 0.0984 | 0.1028 | 0.1056 | 0.0945 | 0.0853 | 0.0821 | 0.0857 | 0.0862 | 0.0858 |
| 0.0502 | 0.0502 | 0.0487 | 0.0466 | 0.0442 | 0.0422 | 0.0414 | 0.0382 | 0.039  |

|        |        |        |        |        |        |        |        |        |   |
|--------|--------|--------|--------|--------|--------|--------|--------|--------|---|
| 0      | 0      | 0      | 0      | 0      | 0      | 0      | 0      | 0      | 0 |
| 0      | 0      | 0      | 0      | 0      | 0      | 0      | 0      | 0      | 0 |
| 0      | 0      | 0      | 0      | 0      | 0      | 0      | 0      | 0      | 0 |
| 0      | 0      | 0      | 0      | 0      | 0      | 0      | 0      | 0      | 0 |
| 0      | 0      | 0      | 0      | 0      | 0      | 0      | 0      | 0      | 0 |
| 0      | 0      | 0      | 0      | 0      | 0      | 0      | 0      | 0      | 0 |
| 0      | 0      | 0      | 0      | 0      | 0      | 0      | 0      | 0      | 0 |
| 0      | 0      | 0      | 0      | 0      | 0      | 0      | 0      | 0      | 0 |
| 0      | 0      | 0      | 0      | 0      | 0      | 0      | 0      | 0      | 0 |
| 0      | 0      | 0      | 0      | 0      | 0      | 0      | 0      | 0      | 0 |
| 0.0092 | 0.0097 | 0.0093 | 0.0096 | 0.0094 | 0.0097 | 0.0096 | 0.0097 | 0.0099 |   |
| 0.0139 | 0.0135 | 0.0137 | 0.0136 | 0.0139 | 0.0144 | 0.0149 | 0.015  | 0.0151 |   |
| 0.032  | 0.0341 | 0.0351 | 0.0359 | 0.0334 | 0.033  | 0.0319 | 0.0329 | 0.0318 |   |
| 0.0765 | 0.0763 | 0.0758 | 0.077  | 0.0752 | 0.0778 | 0.0819 | 0.0815 | 0.0827 |   |
| 0.1574 | 0.1469 | 0.1482 | 0.1458 | 0.1517 | 0.1525 | 0.1544 | 0.1528 | 0.1448 |   |
| 0.1796 | 0.168  | 0.1661 | 0.1588 | 0.1706 | 0.156  | 0.1658 | 0.1675 | 0.1525 |   |
| 0.1786 | 0.1743 | 0.1746 | 0.1707 | 0.1786 | 0.1791 | 0.1877 | 0.188  | 0.1818 |   |
| 0.1939 | 0.189  | 0.1963 | 0.2011 | 0.202  | 0.2105 | 0.2207 | 0.23   | 0.2266 |   |
| 0.184  | 0.1735 | 0.1756 | 0.1738 | 0.1762 | 0.1791 | 0.1864 | 0.1869 | 0.1818 |   |
| 0.1405 | 0.1309 | 0.1358 | 0.1425 | 0.1493 | 0.1388 | 0.1384 | 0.1412 | 0.1325 |   |
| 0.1429 | 0.1332 | 0.1334 | 0.1395 | 0.1441 | 0.147  | 0.1464 | 0.1453 | 0.1358 |   |
| 0.1215 | 0.119  | 0.1213 | 0.121  | 0.1306 | 0.1299 | 0.1346 | 0.1332 | 0.1352 |   |
| 0.149  | 0.1478 | 0.1544 | 0.153  | 0.1583 | 0.1571 | 0.1611 | 0.1596 | 0.1557 |   |
| 0.1703 | 0.1618 | 0.1663 | 0.1711 | 0.1729 | 0.1831 | 0.1854 | 0.191  | 0.1935 |   |
| 0.1898 | 0.1907 | 0.2014 | 0.1996 | 0.2047 | 0.2248 | 0.2255 | 0.229  | 0.2358 |   |
| 0.2042 | 0.209  | 0.2227 | 0.2302 | 0.2405 | 0.2438 | 0.2479 | 0.2553 | 0.2539 |   |
| 0.1913 | 0.2003 | 0.205  | 0.1983 | 0.2065 | 0.2147 | 0.2289 | 0.2292 | 0.2426 |   |
| 0.1871 | 0.1836 | 0.1991 | 0.2029 | 0.2156 | 0.2415 | 0.2458 | 0.243  | 0.2363 |   |
| 0.1837 | 0.1733 | 0.1767 | 0.1782 | 0.1856 | 0.1859 | 0.1914 | 0.1859 | 0.1812 |   |
| 0.1742 | 0.164  | 0.1438 | 0.135  | 0.1483 | 0.1492 | 0.1477 | 0.1383 | 0.1234 |   |
| 0.1612 | 0.1365 | 0.1399 | 0.1496 | 0.1675 | 0.155  | 0.1526 | 0.1534 | 0.1158 |   |
| 0.1915 | 0.1762 | 0.1664 | 0.1724 | 0.1788 | 0.1522 | 0.1611 | 0.1585 | 0.1353 |   |
| 0.2333 | 0.2193 | 0.2026 | 0.1883 | 0.1968 | 0.1942 | 0.2118 | 0.2064 | 0.1896 |   |
| 0.1441 | 0.1202 | 0.1252 | 0.1191 | 0.1251 | 0.1224 | 0.1178 | 0.1083 | 0.0992 |   |
| 0.1372 | 0.126  | 0.1145 | 0.1112 | 0.1244 | 0.1218 | 0.1241 | 0.111  | 0.1002 |   |
| 0.1732 | 0.1548 | 0.1418 | 0.1484 | 0.1418 | 0.1427 | 0.1392 | 0.1293 | 0.1103 |   |
| 0.2038 | 0.1849 | 0.1658 | 0.1489 | 0.1399 | 0.1271 | 0.1376 | 0.1208 | 0.1069 |   |
| 0.1823 | 0.1679 | 0.1589 | 0.1447 | 0.152  | 0.1421 | 0.1378 | 0.1298 | 0.1246 |   |
| 0.1712 | 0.1418 | 0.1468 | 0.1313 | 0.148  | 0.1273 | 0.1384 | 0.1308 | 0.1177 |   |
| 0.1604 | 0.1498 | 0.1598 | 0.1565 | 0.1378 | 0.1305 | 0.1343 | 0.1235 | 0.1157 |   |
| 0.1403 | 0.1317 | 0.1286 | 0.1248 | 0.1254 | 0.119  | 0.1156 | 0.1156 | 0.1089 |   |
| 0.2313 | 0.1925 | 0.172  | 0.1411 | 0.1473 | 0.1291 | 0.1389 | 0.1321 | 0.1161 |   |
| 0.2234 | 0.1999 | 0.2133 | 0.1958 | 0.1989 | 0.1792 | 0.1838 | 0.1796 | 0.147  |   |
| 0.154  | 0.1411 | 0.1297 | 0.1244 | 0.1243 | 0.1183 | 0.1226 | 0.1201 | 0.1113 |   |

|        |        |        |        |        |        |        |        |        |
|--------|--------|--------|--------|--------|--------|--------|--------|--------|
| 0.0534 | 0.0514 | 0.0464 | 0.0498 | 0.046  | 0.0503 | 0.0507 | 0.0516 | 0.0481 |
| 0.0121 | 0.0131 | 0.0133 | 0.0127 | 0.0124 | 0.0125 | 0.0129 | 0.0134 | 0.0137 |
| 0.0033 | 0.003  | 0.0029 | 0.003  | 0.0031 | 0.0031 | 0.0031 | 0.0029 | 0.0028 |
| 0.004  | 0.0039 | 0.0037 | 0.0038 | 0.0036 | 0.0038 | 0.0037 | 0.0039 | 0.0039 |
| 0      | 0      | 0      | 0      | 0      | 0      | 0      | 0      | 0      |
| 0.0017 | 0.0015 | 0.0015 | 0.0015 | 0.0015 | 0.0013 | 0.0014 | 0.0015 | 0.0013 |
| 0      | 0      | 0      | 0      | 0      | 0      | 0      | 0      | 0      |
| 0      | 0      | 0      | 0      | 0      | 0      | 0      | 0      | 0      |
| 0      | 0      | 0      | 0      | 0      | 0      | 0      | 0      | 0      |
| 0      | 0      | 0      | 0      | 0      | 0      | 0      | 0      | 0      |
| 0      | 0      | 0      | 0      | 0      | 0      | 0      | 0      | 0      |
| 0      | 0      | 0      | 0      | 0      | 0      | 0      | 0      | 0      |
| 0      | 0      | 0      | 0      | 0      | 0      | 0      | 0      | 0      |
| 0      | 0      | 0      | 0      | 0      | 0      | 0      | 0      | 0      |
| 0      | 0      | 0      | 0      | 0      | 0      | 0      | 0      | 0      |
| 0      | 0      | 0      | 0      | 0      | 0      | 0      | 0      | 0      |
| 0.0263 | 0.0304 | 0.0283 | 0.0297 | 0.0282 | 0.0279 | 0.0274 | 0.028  | 0.0297 |
| 0.01   | 0.0089 | 0.0087 | 0.0085 | 0.0085 | 0.0086 | 0.0086 | 0.0089 | 0.0087 |
| 0.0178 | 0.0173 | 0.0175 | 0.0168 | 0.0167 | 0.0166 | 0.0161 | 0.0159 | 0.0168 |
| 0.0505 | 0.0495 | 0.0494 | 0.0481 | 0.0482 | 0.049  | 0.0512 | 0.0504 | 0.0484 |
| 0.0978 | 0.093  | 0.0917 | 0.0869 | 0.0931 | 0.093  | 0.0995 | 0.1033 | 0.1005 |
| 0.1287 | 0.1193 | 0.1186 | 0.1118 | 0.1135 | 0.1081 | 0.117  | 0.1186 | 0.1101 |
| 0.1163 | 0.1072 | 0.1058 | 0.1028 | 0.1124 | 0.1116 | 0.1151 | 0.1129 | 0.1147 |
| 0.1694 | 0.1599 | 0.1658 | 0.1658 | 0.1733 | 0.1768 | 0.1769 | 0.1783 | 0.1746 |
| 0.1425 | 0.1417 | 0.1437 | 0.1443 | 0.15   | 0.1555 | 0.1692 | 0.1649 | 0.1692 |
| 0.2463 | 0.2309 | 0.215  | 0.2067 | 0.2154 | 0.209  | 0.2114 | 0.2095 | 0.2036 |
| 0.2076 | 0.1882 | 0.1711 | 0.1697 | 0.1828 | 0.1628 | 0.1609 | 0.1571 | 0.1429 |
| 0.1933 | 0.1689 | 0.1487 | 0.1354 | 0.1515 | 0.1362 | 0.1518 | 0.1394 | 0.1199 |
| 0.1711 | 0.1538 | 0.153  | 0.1519 | 0.1579 | 0.1626 | 0.1557 | 0.1407 | 0.1182 |
| 0.2051 | 0.1964 | 0.1973 | 0.1968 | 0.203  | 0.2078 | 0.2125 | 0.2118 | 0.2119 |
| 0.2387 | 0.2429 | 0.2546 | 0.2635 | 0.2724 | 0.2869 | 0.2973 | 0.2942 | 0.2951 |
| 0.2409 | 0.2335 | 0.2357 | 0.2409 | 0.2492 | 0.2586 | 0.263  | 0.2651 | 0.2722 |
| 0.1689 | 0.1613 | 0.1623 | 0.1601 | 0.1684 | 0.1708 | 0.1793 | 0.178  | 0.1708 |
| 0.1888 | 0.1838 | 0.1953 | 0.2086 | 0.202  | 0.216  | 0.2164 | 0.2266 | 0.2369 |
| 0.1805 | 0.1836 | 0.1917 | 0.1961 | 0.2007 | 0.2136 | 0.2179 | 0.2124 | 0.2161 |
| 0.135  | 0.1184 | 0.1223 | 0.1202 | 0.1254 | 0.129  | 0.115  | 0.1137 | 0.1126 |
| 0.1736 | 0.1709 | 0.1807 | 0.1703 | 0.1896 | 0.1864 | 0.1812 | 0.1731 | 0.1479 |
| 0.1589 | 0.1455 | 0.1293 | 0.1329 | 0.144  | 0.1237 | 0.1268 | 0.1163 | 0.1031 |
| 0.1744 | 0.1599 | 0.1609 | 0.155  | 0.1603 | 0.1691 | 0.1875 | 0.1745 | 0.1633 |
| 0.1454 | 0.1387 | 0.1397 | 0.1316 | 0.1401 | 0.1371 | 0.1313 | 0.1241 | 0.1103 |
| 0.1383 | 0.1262 | 0.1279 | 0.1185 | 0.125  | 0.1131 | 0.1132 | 0.115  | 0.106  |
| 0.2101 | 0.1871 | 0.1834 | 0.1827 | 0.1877 | 0.1817 | 0.1821 | 0.1698 | 0.1448 |
| 0.1513 | 0.147  | 0.1363 | 0.1351 | 0.1242 | 0.1206 | 0.13   | 0.1496 | 0.1413 |
| 0.1204 | 0.1036 | 0.099  | 0.0997 | 0.0989 | 0.094  | 0.0911 | 0.0898 | 0.082  |

|        |        |        |        |        |        |        |        |        |
|--------|--------|--------|--------|--------|--------|--------|--------|--------|
| 0.1863 | 0.172  | 0.1629 | 0.1617 | 0.1626 | 0.1699 | 0.1742 | 0.1742 | 0.168  |
| 0.2465 | 0.24   | 0.2405 | 0.2317 | 0.2283 | 0.2294 | 0.2285 | 0.2258 | 0.2215 |
| 0.2123 | 0.2018 | 0.1957 | 0.203  | 0.1962 | 0.2021 | 0.2116 | 0.2065 | 0.1869 |
| 0.1228 | 0.1239 | 0.1166 | 0.1131 | 0.118  | 0.1177 | 0.1216 | 0.1237 | 0.1097 |
| 0.1652 | 0.1423 | 0.1419 | 0.1429 | 0.1275 | 0.1207 | 0.1344 | 0.1304 | 0.1132 |
| 0.0474 | 0.0462 | 0.044  | 0.0439 | 0.047  | 0.047  | 0.0528 | 0.0532 | 0.0517 |
| 0.0008 | 0.0009 | 0.0009 | 0.0009 | 0.0009 | 0.001  | 0.0011 | 0.001  | 0.0011 |
| 0.0203 | 0.0208 | 0.0206 | 0.0211 | 0.0194 | 0.0206 | 0.0213 | 0.021  | 0.019  |
| 0.0492 | 0.0479 | 0.0452 | 0.0452 | 0.0441 | 0.0453 | 0.0518 | 0.0554 | 0.0552 |
| 0.0693 | 0.0719 | 0.0681 | 0.0659 | 0.0602 | 0.0604 | 0.063  | 0.0572 | 0.0586 |
| 0.0381 | 0.0394 | 0.0378 | 0.0354 | 0.0351 | 0.034  | 0.0351 | 0.0324 | 0.0294 |
| 0      | 0      | 0      | 0      | 0      | 0      | 0      | 0      | 0      |
| 0      | 0      | 0      | 0      | 0      | 0      | 0      | 0      | 0      |
| 0      | 0      | 0      | 0      | 0      | 0      | 0      | 0      | 0      |
| 0      | 0      | 0      | 0      | 0      | 0      | 0      | 0      | 0      |
| 0      | 0      | 0      | 0      | 0      | 0      | 0      | 0      | 0      |
| 0      | 0      | 0      | 0      | 0      | 0      | 0      | 0      | 0      |
| 0      | 0      | 0      | 0      | 0      | 0      | 0      | 0      | 0      |
| 0      | 0      | 0      | 0      | 0      | 0      | 0      | 0      | 0      |
| 0      | 0      | 0      | 0      | 0      | 0      | 0      | 0      | 0      |
| 0      | 0      | 0      | 0      | 0      | 0      | 0      | 0      | 0      |
| 0      | 0      | 0      | 0      | 0      | 0      | 0      | 0      | 0      |
| 0.0049 | 0.0048 | 0.0048 | 0.0048 | 0.0049 | 0.0051 | 0.0055 | 0.0058 | 0.0055 |
| 0.0075 | 0.0077 | 0.0073 | 0.0068 | 0.0066 | 0.0065 | 0.0069 | 0.0076 | 0.008  |
| 0.0251 | 0.0269 | 0.0262 | 0.0252 | 0.026  | 0.024  | 0.0261 | 0.0241 | 0.0228 |
| 0.0021 | 0.0021 | 0.0022 | 0.0022 | 0.0022 | 0.0022 | 0.0023 | 0.0024 | 0.0024 |
| 0.0174 | 0.017  | 0.0178 | 0.0177 | 0.0187 | 0.0183 | 0.019  | 0.0185 | 0.0171 |
| 0.0449 | 0.0437 | 0.0424 | 0.0428 | 0.0432 | 0.0439 | 0.0461 | 0.045  | 0.0441 |
| 0.021  | 0.019  | 0.0195 | 0.0195 | 0.0201 | 0.02   | 0.02   | 0.0206 | 0.0196 |
| 0.0219 | 0.02   | 0.0214 | 0.0226 | 0.0236 | 0.0248 | 0.0262 | 0.0294 | 0.0318 |
| 0.0457 | 0.0472 | 0.0472 | 0.0484 | 0.0479 | 0.0503 | 0.0498 | 0.0492 | 0.0496 |
| 0.3321 | 0.3291 | 0.32   | 0.3179 | 0.3186 | 0.3054 | 0.2879 | 0.2809 | 0.2818 |
| 0.4341 | 0.4178 | 0.4213 | 0.4234 | 0.4326 | 0.4335 | 0.4051 | 0.3933 | 0.3853 |
| 0.2749 | 0.2522 | 0.2179 | 0.203  | 0.2048 | 0.2096 | 0.2166 | 0.2016 | 0.1902 |
| 0.1836 | 0.1645 | 0.1658 | 0.1645 | 0.1735 | 0.1529 | 0.1773 | 0.1687 | 0.1496 |
| 0.2069 | 0.1901 | 0.185  | 0.1653 | 0.1677 | 0.1596 | 0.1827 | 0.1707 | 0.1586 |
| 0.2099 | 0.2094 | 0.2106 | 0.2067 | 0.2049 | 0.2025 | 0.1951 | 0.2017 | 0.1777 |
| 0.1228 | 0.1096 | 0.1116 | 0.1135 | 0.1185 | 0.1207 | 0.1279 | 0.1252 | 0.1237 |
| 0.1525 | 0.133  | 0.1349 | 0.1342 | 0.139  | 0.1377 | 0.1488 | 0.1431 | 0.1373 |
| 0.1705 | 0.1645 | 0.1668 | 0.1747 | 0.1883 | 0.1869 | 0.1944 | 0.1937 | 0.1933 |
| 0.176  | 0.1735 | 0.1783 | 0.1734 | 0.1788 | 0.1803 | 0.1799 | 0.1868 | 0.1843 |
| 0.1537 | 0.1407 | 0.1353 | 0.1309 | 0.134  | 0.1373 | 0.142  | 0.1402 | 0.1371 |
| 0.1458 | 0.13   | 0.1077 | 0.0795 | 0.1001 | 0.09   | 0.104  | 0.1022 | 0.0878 |
| 0.1439 | 0.1277 | 0.1262 | 0.1206 | 0.1292 | 0.1313 | 0.1335 | 0.128  | 0.123  |

|        |        |        |        |        |        |        |        |        |
|--------|--------|--------|--------|--------|--------|--------|--------|--------|
| 0.1824 | 0.1544 | 0.15   | 0.134  | 0.159  | 0.1555 | 0.1589 | 0.156  | 0.1524 |
| 0.1774 | 0.156  | 0.1578 | 0.1435 | 0.143  | 0.1223 | 0.1227 | 0.1079 | 0.1003 |
| 0.1424 | 0.1398 | 0.1332 | 0.1388 | 0.1477 | 0.1519 | 0.1588 | 0.1546 | 0.142  |
| 0.1816 | 0.1769 | 0.1803 | 0.1675 | 0.1661 | 0.1635 | 0.1628 | 0.1658 | 0.1523 |
| 0.142  | 0.1298 | 0.1124 | 0.1165 | 0.1273 | 0.1173 | 0.1268 | 0.1188 | 0.1003 |
| 0.1472 | 0.1332 | 0.1301 | 0.1234 | 0.1279 | 0.1299 | 0.1291 | 0.1235 | 0.1075 |
| 0.193  | 0.1868 | 0.1914 | 0.1859 | 0.1687 | 0.1638 | 0.1614 | 0.1677 | 0.1648 |
| 0.3187 | 0.3315 | 0.3252 | 0.3239 | 0.3182 | 0.3237 | 0.3447 | 0.3394 | 0.3156 |
| 0.2249 | 0.2133 | 0.1988 | 0.1946 | 0.1984 | 0.1989 | 0.2161 | 0.2183 | 0.2043 |
| 0.0484 | 0.0467 | 0.0462 | 0.0447 | 0.0495 | 0.0478 | 0.0486 | 0.0464 | 0.045  |
| 0.0301 | 0.03   | 0.0289 | 0.0287 | 0.0275 | 0.0278 | 0.0252 | 0.0248 | 0.0247 |
| 0.0223 | 0.0245 | 0.0269 | 0.0266 | 0.0255 | 0.0287 | 0.0279 | 0.0286 | 0.0285 |
| 0.019  | 0.0184 | 0.0175 | 0.0164 | 0.0166 | 0.0169 | 0.0176 | 0.017  | 0.0153 |
| 0      | 0      | 0      | 0      | 0      | 0      | 0      | 0      | 0      |
| 0      | 0      | 0      | 0      | 0      | 0      | 0      | 0      | 0      |
| 0.0141 | 0.0141 | 0.0143 | 0.0129 | 0.0121 | 0.0116 | 0.0119 | 0.0114 | 0.0118 |
| 0.0229 | 0.0213 | 0.0203 | 0.0191 | 0.0186 | 0.0197 | 0.0189 | 0.0192 | 0.0191 |
| 0.0221 | 0.0225 | 0.0212 | 0.0208 | 0.0191 | 0.0209 | 0.021  | 0.0203 | 0.0212 |
| 0      | 0      | 0      | 0      | 0      | 0      | 0      | 0      | 0      |
| 0.0035 | 0.0035 | 0.0035 | 0.0037 | 0.0036 | 0.0039 | 0.0039 | 0.0041 | 0.0041 |
| 0      | 0      | 0      | 0      | 0      | 0      | 0      | 0      | 0      |
| 0      | 0      | 0      | 0      | 0      | 0      | 0      | 0      | 0      |
| 0      | 0      | 0      | 0      | 0      | 0      | 0      | 0      | 0      |
| 0      | 0      | 0      | 0      | 0      | 0      | 0      | 0      | 0      |
| 0      | 0      | 0      | 0      | 0      | 0      | 0      | 0      | 0      |
| 0      | 0      | 0      | 0      | 0      | 0      | 0      | 0      | 0      |
| 0      | 0      | 0      | 0      | 0      | 0      | 0      | 0      | 0      |
| 0      | 0      | 0      | 0      | 0      | 0      | 0      | 0      | 0      |
| 0      | 0      | 0      | 0      | 0      | 0      | 0      | 0      | 0      |
| 0      | 0      | 0      | 0      | 0      | 0      | 0      | 0      | 0      |
| 0      | 0      | 0      | 0      | 0      | 0      | 0      | 0      | 0      |
| 0      | 0      | 0      | 0      | 0      | 0      | 0      | 0      | 0      |
| 0      | 0      | 0      | 0      | 0      | 0      | 0      | 0      | 0      |
| 0      | 0      | 0      | 0      | 0      | 0      | 0      | 0      | 0      |
| 0      | 0      | 0      | 0      | 0      | 0      | 0      | 0      | 0      |
| 0      | 0      | 0      | 0      | 0      | 0      | 0      | 0      | 0      |
| 0      | 0      | 0      | 0      | 0      | 0      | 0      | 0      | 0      |
| 0.0496 | 0.0523 | 0.0522 | 0.0528 | 0.0526 | 0.0545 | 0.0526 | 0.0569 | 0.0586 |
| 0.2909 | 0.3174 | 0.3229 | 0.3204 | 0.2993 | 0.2803 | 0.2663 | 0.2524 | 0.28   |
| 0.3835 | 0.3691 | 0.3368 | 0.3203 | 0.3017 | 0.2995 | 0.301  | 0.2918 | 0.2574 |
| 0.2054 | 0.1849 | 0.1832 | 0.1841 | 0.1912 | 0.1747 | 0.1759 | 0.1748 | 0.176  |
| 0.1707 | 0.1555 | 0.1304 | 0.1395 | 0.143  | 0.1423 | 0.1579 | 0.1562 | 0.13   |
| 0.1683 | 0.1662 | 0.1588 | 0.1628 | 0.1713 | 0.155  | 0.1476 | 0.14   | 0.1317 |
| 0.1516 | 0.1467 | 0.1408 | 0.1278 | 0.1255 | 0.122  | 0.1179 | 0.1035 | 0.091  |
| 0.1575 | 0.1471 | 0.1499 | 0.1402 | 0.1266 | 0.1204 | 0.1337 | 0.1167 | 0.1098 |













|        |        |        |        |        |        |        |        |        |   |
|--------|--------|--------|--------|--------|--------|--------|--------|--------|---|
| 0      | 0      | 0      | 0      | 0      | 0      | 0      | 0      | 0      | 0 |
| 0      | 0      | 0      | 0      | 0      | 0      | 0      | 0      | 0      | 0 |
| 0      | 0      | 0      | 0      | 0      | 0      | 0      | 0      | 0      | 0 |
| 0      | 0      | 0      | 0      | 0      | 0      | 0      | 0      | 0      | 0 |
| 0      | 0      | 0      | 0      | 0      | 0      | 0      | 0      | 0      | 0 |
| 0      | 0      | 0      | 0      | 0      | 0      | 0      | 0      | 0      | 0 |
| 0      | 0      | 0      | 0      | 0      | 0      | 0      | 0      | 0      | 0 |
| 0      | 0      | 0      | 0      | 0      | 0      | 0      | 0      | 0      | 0 |
| 0      | 0      | 0      | 0      | 0      | 0      | 0      | 0      | 0      | 0 |
| 0      | 0      | 0      | 0      | 0      | 0      | 0      | 0      | 0      | 0 |
| 0      | 0      | 0      | 0      | 0      | 0      | 0      | 0      | 0      | 0 |
| 0      | 0      | 0      | 0      | 0      | 0      | 0      | 0      | 0      | 0 |
| 0      | 0      | 0      | 0      | 0      | 0      | 0      | 0      | 0      | 0 |
| 0      | 0      | 0      | 0      | 0      | 0      | 0      | 0      | 0      | 0 |
| 0      | 0      | 0      | 0      | 0      | 0      | 0      | 0      | 0      | 0 |
| 0      | 0      | 0      | 0      | 0      | 0      | 0      | 0      | 0      | 0 |
| 0      | 0      | 0      | 0      | 0      | 0      | 0      | 0      | 0      | 0 |
| 0      | 0      | 0      | 0      | 0      | 0      | 0      | 0      | 0      | 0 |
| 0      | 0      | 0      | 0      | 0      | 0      | 0      | 0      | 0      | 0 |
| 0      | 0      | 0      | 0      | 0      | 0      | 0      | 0      | 0      | 0 |
| 0      | 0      | 0      | 0      | 0      | 0      | 0      | 0      | 0      | 0 |
| 0      | 0      | 0      | 0      | 0      | 0      | 0      | 0      | 0      | 0 |
| 0.0235 | 0.0243 | 0.023  | 0.0217 | 0.022  | 0.0223 | 0.0226 | 0.022  | 0.0237 |   |
| 0.0071 | 0.0066 | 0.0069 | 0.0071 | 0.0073 | 0.0075 | 0.0077 | 0.0074 | 0.0076 |   |
| 0.0026 | 0.0026 | 0.0027 | 0.0027 | 0.0027 | 0.0029 | 0.003  | 0.0032 | 0.0033 |   |
| 0.0106 | 0.0105 | 0.01   | 0.0094 | 0.0086 | 0.0081 | 0.0091 | 0.0096 | 0.009  |   |
| 0.015  | 0.0154 | 0.0142 | 0.0143 | 0.0124 | 0.0125 | 0.013  | 0.011  | 0.0101 |   |
| 0.0105 | 0.0111 | 0.0098 | 0.0108 | 0.0095 | 0.0098 | 0.0101 | 0.0104 | 0.0108 |   |
| 0.0084 | 0.0084 | 0.0084 | 0.0087 | 0.0083 | 0.0089 | 0.0089 | 0.0088 | 0.0091 |   |
| 0.0151 | 0.0151 | 0.0151 | 0.0151 | 0.0143 | 0.0151 | 0.0149 | 0.0157 | 0.0165 |   |
| 0.0721 | 0.072  | 0.0679 | 0.0708 | 0.0644 | 0.0659 | 0.064  | 0.0605 | 0.0592 |   |
| 0.0068 | 0.0065 | 0.0068 | 0.0069 | 0.0072 | 0.0071 | 0.0075 | 0.0073 | 0.0072 |   |
| 0.0096 | 0.0095 | 0.0102 | 0.0104 | 0.0103 | 0.0109 | 0.0113 | 0.0118 | 0.0119 |   |
| 0.0349 | 0.0364 | 0.0352 | 0.0353 | 0.0332 | 0.0343 | 0.0342 | 0.0334 | 0.0334 |   |
| 0.0157 | 0.0154 | 0.015  | 0.0149 | 0.014  | 0.014  | 0.0141 | 0.012  | 0.0125 |   |
| 0.0012 | 0.0011 | 0.001  | 0.001  | 0.0011 | 0.001  | 0.0011 | 0.0011 | 0.001  |   |
| 0.0351 | 0.0328 | 0.0343 | 0.0346 | 0.0371 | 0.0381 | 0.0381 | 0.0381 | 0.0373 |   |
| 0.1339 | 0.1293 | 0.1328 | 0.1355 | 0.1421 | 0.1498 | 0.1506 | 0.1501 | 0.1516 |   |
| 0.0321 | 0.032  | 0.0324 | 0.0326 | 0.0319 | 0.0339 | 0.0335 | 0.0328 | 0.0329 |   |
| 0.0121 | 0.0123 | 0.0122 | 0.0125 | 0.0122 | 0.0124 | 0.0128 | 0.0131 | 0.0129 |   |
| 0      | 0      | 0      | 0      | 0      | 0      | 0      | 0      | 0      |   |
| 0.0044 | 0.0044 | 0.0047 | 0.0047 | 0.005  | 0.0053 | 0.0056 | 0.0057 | 0.0059 |   |
| 0.0097 | 0.0096 | 0.0098 | 0.01   | 0.0103 | 0.0108 | 0.0108 | 0.0107 | 0.0109 |   |
| 0.0073 | 0.0074 | 0.0071 | 0.0071 | 0.0069 | 0.0073 | 0.0079 | 0.0076 | 0.0077 |   |















|         |        |        |        |        |        |        |        |        |
|---------|--------|--------|--------|--------|--------|--------|--------|--------|
| 0       | 0      | 0      | 0      | 0      | 0      | 0      | 0      | 0      |
| 0       | 0      | 0      | 0      | 0      | 0      | 0      | 0      | 0      |
| 0       | 0      | 0      | 0      | 0      | 0      | 0      | 0      | 0      |
| 0       | 0      | 0      | 0      | 0      | 0      | 0      | 0      | 0      |
| 0       | 0      | 0      | 0      | 0      | 0      | 0      | 0      | 0      |
| 0       | 0      | 0      | 0      | 0      | 0      | 0      | 0      | 0      |
| 0       | 0      | 0      | 0      | 0      | 0      | 0      | 0      | 0      |
| 0       | 0      | 0      | 0      | 0      | 0      | 0      | 0      | 0      |
| 0       | 0      | 0      | 0      | 0      | 0      | 0      | 0      | 0      |
| 0       | 0      | 0      | 0      | 0      | 0      | 0      | 0      | 0      |
| 0       | 0      | 0      | 0      | 0      | 0      | 0      | 0      | 0      |
| 0       | 0      | 0      | 0      | 0      | 0      | 0      | 0      | 0      |
| 0       | 0      | 0      | 0      | 0      | 0      | 0      | 0      | 0      |
| 0       | 0      | 0      | 0      | 0      | 0      | 0      | 0      | 0      |
| 0       | 0      | 0      | 0      | 0      | 0      | 0      | 0      | 0      |
| 0       | 0      | 0      | 0      | 0      | 0      | 0      | 0      | 0      |
| 0       | 0      | 0      | 0      | 0      | 0      | 0      | 0      | 0      |
| 0       | 0      | 0      | 0      | 0      | 0      | 0      | 0      | 0      |
| 0       | 0      | 0      | 0      | 0      | 0      | 0      | 0      | 0      |
| 0       | 0      | 0      | 0      | 0      | 0      | 0      | 0      | 0      |
| 0       | 0      | 0      | 0      | 0      | 0      | 0      | 0      | 0      |
| 0       | 0      | 0      | 0      | 0      | 0      | 0      | 0      | 0      |
| 0       | 0      | 0      | 0      | 0      | 0      | 0      | 0      | 0      |
| 0.0004  | 0.0013 | 0.0025 | 0.0026 | 0.0024 | 0.0026 | 0.0027 | 0.0023 | 0.0022 |
| 0       | 0      | 0      | 0      | 0      | 0      | 0      | 0      | 0      |
| -0.0006 | 0.0007 | 0.0009 | 0.0016 | 0.0015 | 0.0021 | 0.0024 | 0.0023 | 0.0026 |
| 0       | 0.0006 | 0.0007 | 0.001  | 0.001  | 0.0014 | 0.0017 | 0.0016 | 0.0014 |
| 0.0004  | 0.0011 | 0.0021 | 0.0023 | 0.0021 | 0.002  | 0.002  | 0.0015 | 0.0014 |
| 0.0438  | 0.0189 | 0.0157 | 0.015  | 0.0139 | 0.0133 | 0.0111 | 0.0078 | 0.0054 |
| 0.0639  | 0.0285 | 0.0197 | 0.0162 | 0.0142 | 0.0183 | 0.0187 | 0.0175 | 0.0157 |
| 0.0236  | 0.0099 | 0.0077 | 0.0058 | 0.0057 | 0.0061 | 0.0061 | 0.0055 | 0.0053 |
| 0.0001  | 0.0006 | 0.0009 | 0.0014 | 0.0013 | 0.0015 | 0.0018 | 0.0016 | 0.0016 |
| 0       | 0.0015 | 0.0018 | 0.0025 | 0.0023 | 0.0027 | 0.0033 | 0.0032 | 0.0031 |
| -0.001  | 0.0012 | 0.0018 | 0.0035 | 0.0028 | 0.0036 | 0.004  | 0.0038 | 0.0042 |
| -0.0003 | 0.0006 | 0.0013 | 0.0019 | 0.002  | 0.0023 | 0.0027 | 0.0022 | 0.0022 |
| 0.0075  | 0.0043 | 0.0045 | 0.005  | 0.0044 | 0.0051 | 0.0051 | 0.0043 | 0.0044 |
| 0       | 0      | 0      | 0      | 0      | 0      | 0      | 0      | 0      |
| 0.0002  | 0.0006 | 0.0012 | 0.0011 | 0.0011 | 0.001  | 0.001  | 0.0008 | 0.0008 |
| 0.0011  | 0.0057 | 0.0079 | 0.0101 | 0.0094 | 0.01   | 0.0119 | 0.0109 | 0.0108 |
| 0.0002  | 0.0008 | 0.0015 | 0.0016 | 0.0014 | 0.0016 | 0.0018 | 0.0015 | 0.0015 |
| 0.0005  | 0.0013 | 0.0024 | 0.0024 | 0.0022 | 0.0021 | 0.0021 | 0.0015 | 0.0014 |
| -0.0001 | 0.0011 | 0.0018 | 0.0022 | 0.0021 | 0.0022 | 0.0025 | 0.0023 | 0.0025 |
| -0.0001 | 0.0003 | 0.0003 | 0.0005 | 0.0004 | 0.0005 | 0.0007 | 0.0006 | 0.0007 |
| 0       | 0      | 0      | 0      | 0      | 0      | 0      | 0      | 0      |
| 0.0084  | 0.0048 | 0.0056 | 0.0054 | 0.0051 | 0.0053 | 0.005  | 0.0041 | 0.0037 |

|         |        |        |        |        |        |        |        |        |
|---------|--------|--------|--------|--------|--------|--------|--------|--------|
| 0.0081  | 0.0055 | 0.0067 | 0.0067 | 0.0063 | 0.0068 | 0.0069 | 0.0057 | 0.0054 |
| 0.0002  | 0.0005 | 0.0004 | 0.0007 | 0.0008 | 0.0009 | 0.0011 | 0.0009 | 0.0009 |
| 0       | 0      | 0      | 0      | 0      | 0      | 0      | 0      | 0      |
| 0       | 0      | 0      | 0      | 0      | 0      | 0      | 0      | 0      |
| 0       | 0      | 0      | 0      | 0      | 0      | 0      | 0      | 0      |
| 0       | 0      | 0      | 0      | 0      | 0      | 0      | 0      | 0      |
| 0       | 0      | 0      | 0      | 0      | 0      | 0      | 0      | 0      |
| 0       | 0      | 0      | 0      | 0      | 0      | 0      | 0      | 0      |
| 0       | 0      | 0      | 0      | 0      | 0      | 0      | 0      | 0      |
| 0       | 0      | 0      | 0      | 0      | 0      | 0      | 0      | 0      |
| 0       | 0      | 0      | 0      | 0      | 0      | 0      | 0      | 0      |
| 0       | 0      | 0      | 0      | 0      | 0      | 0      | 0      | 0      |
| 0       | 0      | 0      | 0      | 0      | 0      | 0      | 0      | 0      |
| 0       | 0      | 0      | 0      | 0      | 0      | 0      | 0      | 0      |
| 0       | 0      | 0      | 0      | 0      | 0      | 0      | 0      | 0      |
| 0       | 0      | 0      | 0      | 0      | 0      | 0      | 0      | 0      |
| 0       | 0      | 0      | 0      | 0      | 0      | 0      | 0      | 0      |
| 0       | 0      | 0      | 0      | 0      | 0      | 0      | 0      | 0      |
| 0       | 0      | 0      | 0      | 0      | 0      | 0      | 0      | 0      |
| 0       | 0      | 0      | 0      | 0      | 0      | 0      | 0      | 0      |
| 0       | 0      | 0      | 0      | 0      | 0      | 0      | 0      | 0      |
| 0       | 0      | 0      | 0      | 0      | 0      | 0      | 0      | 0      |
| 0       | 0      | 0      | 0      | 0      | 0      | 0      | 0      | 0      |
| 0       | 0      | 0      | 0      | 0      | 0      | 0      | 0      | 0      |
| 0.0221  | 0.0094 | 0.0084 | 0.0082 | 0.0088 | 0.009  | 0.0085 | 0.0079 | 0.0081 |
| 0.0218  | 0.0087 | 0.007  | 0.0059 | 0.0062 | 0.0058 | 0.0051 | 0.0051 | 0.0049 |
| 0.0345  | 0.0139 | 0.0114 | 0.012  | 0.0108 | 0.0138 | 0.0145 | 0.0132 | 0.0126 |
| 0.0214  | 0.0074 | 0.0075 | 0.0058 | 0.0063 | 0.0071 | 0.0078 | 0.0065 | 0.0066 |
| 0.0003  | 0.0006 | 0.0012 | 0.0012 | 0.0011 | 0.001  | 0.0011 | 0.0008 | 0.0009 |
| -0.0004 | 0.0026 | 0.0043 | 0.0062 | 0.0052 | 0.0061 | 0.0075 | 0.0056 | 0.0057 |
| -0.0008 | 0.0042 | 0.0073 | 0.0099 | 0.0093 | 0.0111 | 0.0129 | 0.0121 | 0.0127 |
| 0       | 0      | 0      | 0      | 0      | 0      | 0      | 0      | 0      |
| 0       | 0      | 0      | 0      | 0      | 0      | 0      | 0      | 0      |
| 0.0224  | 0.0094 | 0.0068 | 0.0072 | 0.0077 | 0.0082 | 0.0071 | 0.0056 | 0.0043 |
| 0.0072  | 0.0029 | 0.0022 | 0.0018 | 0.0018 | 0.0022 | 0.0021 | 0.0019 | 0.0014 |
| 0.0002  | 0.0013 | 0.0021 | 0.0025 | 0.0024 | 0.0027 | 0.0029 | 0.0025 | 0.0023 |
| 0.0319  | 0.0173 | 0.0158 | 0.0144 | 0.0138 | 0.0151 | 0.0155 | 0.0125 | 0.0123 |
| 0.0161  | 0.0086 | 0.0087 | 0.0076 | 0.0069 | 0.0073 | 0.0071 | 0.0056 | 0.0046 |
| 0.0003  | 0.0005 | 0.0011 | 0.0011 | 0.001  | 0.0009 | 0.001  | 0.0008 | 0.0008 |
| 0.0052  | 0.0063 | 0.0064 | 0.01   | 0.0093 | 0.0122 | 0.015  | 0.0128 | 0.0132 |



|        |        |        |        |        |        |        |        |        |
|--------|--------|--------|--------|--------|--------|--------|--------|--------|
| 0      | 0      | 0      | 0      | 0      | 0      | 0      | 0      | 0      |
| 0.0002 | 0.0009 | 0.0015 | 0.0018 | 0.0017 | 0.0018 | 0.002  | 0.0017 | 0.0016 |
| 0.0079 | 0.0041 | 0.0037 | 0.0031 | 0.0032 | 0.0034 | 0.003  | 0.0027 | 0.0023 |
| 0.0152 | 0.0065 | 0.0055 | 0.005  | 0.0047 | 0.0057 | 0.0052 | 0.0049 | 0.0055 |
| 0.0146 | 0.0088 | 0.0083 | 0.0093 | 0.0091 | 0.0109 | 0.0105 | 0.0089 | 0.0085 |
| 0.0475 | 0.0223 | 0.0199 | 0.0169 | 0.0157 | 0.0171 | 0.0162 | 0.0135 | 0.0092 |
| 0.0071 | 0.0031 | 0.0027 | 0.0029 | 0.0027 | 0.0033 | 0.0033 | 0.003  | 0.0027 |
| 0      | 0      | 0      | 0      | 0      | 0      | 0      | 0      | 0      |
| 0      | 0      | 0      | 0      | 0      | 0      | 0      | 0      | 0      |
| 0      | 0      | 0      | 0      | 0      | 0      | 0      | 0      | 0      |
| 0.0141 | 0.0049 | 0.003  | 0.0021 | 0.0028 | 0.0038 | 0.0039 | 0.0042 | 0.0038 |
| 0.0002 | 0.0009 | 0.0021 | 0.0021 | 0.0019 | 0.0019 | 0.0018 | 0.0014 | 0.0013 |
| 0      | 0      | 0      | 0      | 0      | 0      | 0      | 0      | 0      |
| 0.0156 | 0.0075 | 0.006  | 0.0065 | 0.0067 | 0.0078 | 0.0078 | 0.0074 | 0.0078 |
| 0      | 0      | 0      | 0      | 0      | 0      | 0      | 0      | 0      |
| 0      | 0      | 0      | 0      | 0      | 0      | 0      | 0      | 0      |
| 0      | 0      | 0      | 0      | 0      | 0      | 0      | 0      | 0      |
| 0      | 0      | 0      | 0      | 0      | 0      | 0      | 0      | 0      |
| 0      | 0      | 0      | 0      | 0      | 0      | 0      | 0      | 0      |
| 0      | 0      | 0      | 0      | 0      | 0      | 0      | 0      | 0      |
| 0      | 0      | 0      | 0      | 0      | 0      | 0      | 0      | 0      |
| 0      | 0      | 0      | 0      | 0      | 0      | 0      | 0      | 0      |
| 0      | 0      | 0      | 0      | 0      | 0      | 0      | 0      | 0      |
| 0      | 0      | 0      | 0      | 0      | 0      | 0      | 0      | 0      |
| 0      | 0      | 0      | 0      | 0      | 0      | 0      | 0      | 0      |
| 0      | 0      | 0      | 0      | 0      | 0      | 0      | 0      | 0      |
| 0      | 0      | 0      | 0      | 0      | 0      | 0      | 0      | 0      |
| 0      | 0      | 0      | 0      | 0      | 0      | 0      | 0      | 0      |
| 0      | 0      | 0      | 0      | 0      | 0      | 0      | 0      | 0      |
| 0      | 0      | 0      | 0      | 0      | 0      | 0      | 0      | 0      |
| 0      | 0      | 0      | 0      | 0      | 0      | 0      | 0      | 0      |
| 0      | 0      | 0      | 0      | 0      | 0      | 0      | 0      | 0      |
| 0      | 0      | 0      | 0      | 0      | 0      | 0      | 0      | 0      |
| 0      | 0      | 0      | 0      | 0      | 0      | 0      | 0      | 0      |
| 0      | 0      | 0      | 0      | 0      | 0      | 0      | 0      | 0      |
| 0      | 0      | 0      | 0      | 0      | 0      | 0      | 0      | 0      |
| 0      | 0      | 0      | 0      | 0      | 0      | 0      | 0      | 0      |
| 0      | 0      | 0      | 0      | 0      | 0      | 0      | 0      | 0      |
| 0      | 0      | 0      | 0      | 0      | 0      | 0      | 0      | 0      |
| 0.0147 | 0.0064 | 0.0045 | 0.0034 | 0.003  | 0.0037 | 0.0037 | 0.0038 | 0.004  |
| 0.001  | 0.003  | 0.0052 | 0.0057 | 0.0054 | 0.0056 | 0.0057 | 0.005  | 0.0045 |
| 0.0246 | 0.0141 | 0.0148 | 0.0138 | 0.013  | 0.0128 | 0.0129 | 0.0108 | 0.0103 |
| 0.0075 | 0.004  | 0.0042 | 0.004  | 0.0039 | 0.0036 | 0.0033 | 0.0025 | 0.0024 |











|         |        |        |        |        |        |        |        |        |   |
|---------|--------|--------|--------|--------|--------|--------|--------|--------|---|
| 0       | 0      | 0      | 0      | 0      | 0      | 0      | 0      | 0      | 0 |
| 0       | 0      | 0      | 0      | 0      | 0      | 0      | 0      | 0      | 0 |
| 0       | 0      | 0      | 0      | 0      | 0      | 0      | 0      | 0      | 0 |
| 0       | 0      | 0      | 0      | 0      | 0      | 0      | 0      | 0      | 0 |
| 0       | 0      | 0      | 0      | 0      | 0      | 0      | 0      | 0      | 0 |
| 0       | 0      | 0      | 0      | 0      | 0      | 0      | 0      | 0      | 0 |
| 0       | 0      | 0      | 0      | 0      | 0      | 0      | 0      | 0      | 0 |
| 0       | 0      | 0      | 0      | 0      | 0      | 0      | 0      | 0      | 0 |
| 0       | 0      | 0      | 0      | 0      | 0      | 0      | 0      | 0      | 0 |
| 0       | 0      | 0      | 0      | 0      | 0      | 0      | 0      | 0      | 0 |
| 0       | 0      | 0      | 0      | 0      | 0      | 0      | 0      | 0      | 0 |
| 0.0017  | 0.0059 | 0.0102 | 0.0106 | 0.0093 | 0.0092 | 0.0092 | 0.0072 | 0.0064 |   |
| -0.001  | 0.0003 | 0.0004 | 0.0016 | 0.0017 | 0.0025 | 0.0034 | 0.0029 | 0.0028 |   |
| 0.0039  | 0.0093 | 0.0175 | 0.017  | 0.0157 | 0.0142 | 0.0145 | 0.0122 | 0.0125 |   |
| 0.004   | 0.0091 | 0.0174 | 0.0173 | 0.0155 | 0.0157 | 0.0161 | 0.0125 | 0.0131 |   |
| 0.0217  | 0.0097 | 0.0073 | 0.0076 | 0.0087 | 0.0097 | 0.01   | 0.0097 | 0.0083 |   |
| 0.03    | 0.0135 | 0.0102 | 0.0097 | 0.0102 | 0.0111 | 0.0106 | 0.0083 | 0.0077 |   |
| 0.003   | 0.0064 | 0.011  | 0.011  | 0.0103 | 0.0101 | 0.0098 | 0.008  | 0.007  |   |
| 0       | 0      | 0      | 0      | 0      | 0      | 0      | 0      | 0      |   |
| -0.0002 | 0.0025 | 0.003  | 0.0047 | 0.0044 | 0.0048 | 0.0061 | 0.0054 | 0.0057 |   |
| 0.0542  | 0.0445 | 0.0618 | 0.0635 | 0.0591 | 0.0616 | 0.0628 | 0.0506 | 0.0485 |   |
| 0.1256  | 0.0665 | 0.0576 | 0.0561 | 0.0554 | 0.0593 | 0.0593 | 0.0474 | 0.0468 |   |
| 0.1227  | 0.0659 | 0.0692 | 0.0718 | 0.0726 | 0.0821 | 0.0865 | 0.0703 | 0.0624 |   |
| 0.0538  | 0.086  | 0.1293 | 0.1472 | 0.1303 | 0.1337 | 0.1454 | 0.1178 | 0.1103 |   |
| 0.0268  | 0.0819 | 0.1098 | 0.1371 | 0.1225 | 0.1327 | 0.157  | 0.1253 | 0.1309 |   |
| -0.002  | 0.0542 | 0.0958 | 0.1286 | 0.1072 | 0.113  | 0.1225 | 0.0889 | 0.116  |   |
| 0.0523  | 0.0857 | 0.1155 | 0.1421 | 0.1172 | 0.1615 | 0.1826 | 0.1547 | 0.1587 |   |
| 0.0081  | 0.0597 | 0.1101 | 0.1369 | 0.1189 | 0.1229 | 0.1418 | 0.1231 | 0.1202 |   |
| 0.0392  | 0.099  | 0.1473 | 0.1792 | 0.1569 | 0.1728 | 0.1856 | 0.1584 | 0.1613 |   |
| 0.0425  | 0.0812 | 0.1243 | 0.1536 | 0.1311 | 0.1416 | 0.151  | 0.123  | 0.1271 |   |
| 0.0455  | 0.1008 | 0.171  | 0.1873 | 0.1697 | 0.1735 | 0.1816 | 0.1553 | 0.1493 |   |
| 0.0252  | 0.0779 | 0.1514 | 0.148  | 0.1414 | 0.1289 | 0.1409 | 0.107  | 0.1009 |   |
| 0.0293  | 0.0864 | 0.1522 | 0.1641 | 0.1464 | 0.1496 | 0.1613 | 0.1366 | 0.1292 |   |
| 0.0332  | 0.0606 | 0.096  | 0.1024 | 0.0899 | 0.0988 | 0.1028 | 0.0791 | 0.076  |   |
| 0.0104  | 0.0118 | 0.0195 | 0.0188 | 0.0167 | 0.0164 | 0.0159 | 0.0125 | 0.0111 |   |
| 0.0036  | 0.0144 | 0.0193 | 0.0331 | 0.0317 | 0.0358 | 0.0466 | 0.0424 | 0.0432 |   |
| 0.1394  | 0.0862 | 0.0863 | 0.0995 | 0.0916 | 0.1033 | 0.1107 | 0.0943 | 0.0927 |   |
| 0.1401  | 0.0527 | 0.0344 | 0.0358 | 0.0379 | 0.0426 | 0.0432 | 0.035  | 0.0353 |   |
| 0.015   | 0.009  | 0.0117 | 0.0121 | 0.0111 | 0.0107 | 0.0106 | 0.0082 | 0.0077 |   |
| 0.0008  | 0.0028 | 0.0058 | 0.006  | 0.0055 | 0.0054 | 0.0055 | 0.0045 | 0.0043 |   |
| 0.0145  | 0.0068 | 0.0051 | 0.0045 | 0.0048 | 0.0051 | 0.0051 | 0.0048 | 0.0045 |   |
| 0.0044  | 0.0115 | 0.0191 | 0.0222 | 0.0194 | 0.0186 | 0.0205 | 0.0159 | 0.0164 |   |
| 0.0079  | 0.0035 | 0.0028 | 0.0024 | 0.0029 | 0.0028 | 0.0028 | 0.0023 | 0.0021 |   |

|         |        |        |        |        |        |        |        |        |
|---------|--------|--------|--------|--------|--------|--------|--------|--------|
| 0.001   | 0.0026 | 0.005  | 0.0053 | 0.005  | 0.0052 | 0.0054 | 0.0044 | 0.004  |
| 0.0005  | 0.0017 | 0.0027 | 0.003  | 0.0026 | 0.0026 | 0.0028 | 0.002  | 0.0021 |
| 0.0075  | 0.0036 | 0.0027 | 0.0027 | 0.0026 | 0.0026 | 0.0029 | 0.0022 | 0.0019 |
| 0       | 0      | 0      | 0      | 0      | 0      | 0      | 0      | 0      |
| 0       | 0      | 0      | 0      | 0      | 0      | 0      | 0      | 0      |
| 0.0003  | 0.0007 | 0.0013 | 0.0013 | 0.0012 | 0.0012 | 0.0012 | 0.0009 | 0.0009 |
| 0.0286  | 0.0124 | 0.0106 | 0.0087 | 0.0097 | 0.0108 | 0.0113 | 0.0105 | 0.0089 |
| 0.0084  | 0.0042 | 0.0031 | 0.0028 | 0.0027 | 0.0028 | 0.0026 | 0.0023 | 0.0024 |
| 0       | 0      | 0      | 0      | 0      | 0      | 0      | 0      | 0      |
| 0       | 0      | 0      | 0      | 0      | 0      | 0      | 0      | 0      |
| 0       | 0      | 0      | 0      | 0      | 0      | 0      | 0      | 0      |
| 0       | 0      | 0      | 0      | 0      | 0      | 0      | 0      | 0      |
| 0       | 0      | 0      | 0      | 0      | 0      | 0      | 0      | 0      |
| 0       | 0      | 0      | 0      | 0      | 0      | 0      | 0      | 0      |
| 0       | 0      | 0      | 0      | 0      | 0      | 0      | 0      | 0      |
| 0       | 0      | 0      | 0      | 0      | 0      | 0      | 0      | 0      |
| 0       | 0      | 0      | 0      | 0      | 0      | 0      | 0      | 0      |
| 0       | 0      | 0      | 0      | 0      | 0      | 0      | 0      | 0      |
| 0       | 0      | 0      | 0      | 0      | 0      | 0      | 0      | 0      |
| 0.0018  | 0.0047 | 0.0069 | 0.0093 | 0.009  | 0.0097 | 0.0114 | 0.0098 | 0.01   |
| 0.0083  | 0.0041 | 0.0032 | 0.0028 | 0.0029 | 0.0029 | 0.0026 | 0.0023 | 0.002  |
| 0.0295  | 0.0132 | 0.0124 | 0.0141 | 0.0125 | 0.0156 | 0.0163 | 0.0135 | 0.0126 |
| 0.0012  | 0.0046 | 0.0049 | 0.0061 | 0.0058 | 0.0074 | 0.0094 | 0.0086 | 0.0091 |
| 0.0006  | 0.0013 | 0.0024 | 0.0025 | 0.0023 | 0.002  | 0.0021 | 0.0016 | 0.0014 |
| 0.0002  | 0.0009 | 0.0019 | 0.0019 | 0.0017 | 0.0016 | 0.0018 | 0.0015 | 0.0014 |
| 0.0443  | 0.0204 | 0.0175 | 0.0194 | 0.0194 | 0.0231 | 0.0238 | 0.0223 | 0.023  |
| 0.0929  | 0.041  | 0.0407 | 0.0388 | 0.0341 | 0.037  | 0.041  | 0.0337 | 0.0286 |
| 0.0013  | 0.0047 | 0.0084 | 0.0083 | 0.0076 | 0.007  | 0.0073 | 0.0061 | 0.0061 |
| 0.0074  | 0.0499 | 0.0723 | 0.0895 | 0.0736 | 0.0851 | 0.0945 | 0.0717 | 0.0757 |
| 0.0255  | 0.04   | 0.0544 | 0.0722 | 0.0598 | 0.0673 | 0.074  | 0.0684 | 0.0717 |
| 0.0526  | 0.0413 | 0.056  | 0.0551 | 0.0517 | 0.0519 | 0.052  | 0.0419 | 0.0406 |
| 0.0751  | 0.1086 | 0.1815 | 0.1985 | 0.184  | 0.1881 | 0.1859 | 0.1466 | 0.1399 |
| 0.0686  | 0.1104 | 0.1848 | 0.2055 | 0.1852 | 0.1774 | 0.1814 | 0.1478 | 0.1419 |
| 0.0536  | 0.1062 | 0.1931 | 0.2033 | 0.1915 | 0.1929 | 0.2038 | 0.1637 | 0.163  |
| -0.0011 | 0.0745 | 0.1588 | 0.1679 | 0.1481 | 0.1694 | 0.1874 | 0.1455 | 0.1379 |
| 0.0984  | 0.1481 | 0.2558 | 0.2594 | 0.2327 | 0.2262 | 0.2335 | 0.1754 | 0.1627 |
| 0.0392  | 0.0772 | 0.1388 | 0.1538 | 0.1391 | 0.1382 | 0.14   | 0.1131 | 0.1056 |
| 0.0322  | 0.0857 | 0.1324 | 0.1527 | 0.139  | 0.1499 | 0.1693 | 0.1416 | 0.141  |
| -0.0002 | 0.041  | 0.0855 | 0.1037 | 0.0901 | 0.0887 | 0.1075 | 0.0898 | 0.0952 |
| 0.0096  | 0.0618 | 0.0888 | 0.1165 | 0.1057 | 0.1159 | 0.1379 | 0.1244 | 0.1229 |
| 0.0297  | 0.0536 | 0.0743 | 0.0944 | 0.0801 | 0.0955 | 0.1119 | 0.0958 | 0.1005 |
| 0.093   | 0.0949 | 0.1347 | 0.1426 | 0.1324 | 0.135  | 0.1326 | 0.1062 | 0.1015 |
| 0.1031  | 0.1257 | 0.2021 | 0.1933 | 0.1739 | 0.1751 | 0.1714 | 0.1222 | 0.1205 |
| 0.0779  | 0.0681 | 0.0986 | 0.0999 | 0.0906 | 0.0939 | 0.0945 | 0.0759 | 0.0706 |
| 0.0456  | 0.0338 | 0.0385 | 0.0448 | 0.0424 | 0.0465 | 0.0492 | 0.0411 | 0.0416 |

|         |        |        |        |        |        |        |        |        |
|---------|--------|--------|--------|--------|--------|--------|--------|--------|
| 0.0119  | 0.0159 | 0.0227 | 0.0248 | 0.0228 | 0.0233 | 0.024  | 0.0199 | 0.0195 |
| 0.0003  | 0.0029 | 0.003  | 0.0055 | 0.0048 | 0.0058 | 0.0075 | 0.0073 | 0.0079 |
| -0.0028 | 0.0027 | 0.0047 | 0.0074 | 0.0069 | 0.0089 | 0.0119 | 0.0101 | 0.0115 |
| 0.0038  | 0.0087 | 0.0164 | 0.0174 | 0.0152 | 0.0149 | 0.0148 | 0.0107 | 0.0102 |
| 0.0003  | 0.0007 | 0.0013 | 0.0013 | 0.0012 | 0.0011 | 0.0011 | 0.0008 | 0.0007 |
| -0.0005 | 0.0006 | 0.0006 | 0.0013 | 0.0013 | 0.0019 | 0.0021 | 0.0018 | 0.0021 |
| 0.0142  | 0.0073 | 0.0087 | 0.0084 | 0.0077 | 0.0083 | 0.0082 | 0.006  | 0.0047 |
| 0.0081  | 0.0049 | 0.0052 | 0.0051 | 0.0048 | 0.0048 | 0.0047 | 0.004  | 0.0037 |
| 0.0311  | 0.0145 | 0.0111 | 0.0107 | 0.0107 | 0.0113 | 0.0103 | 0.0091 | 0.008  |
| 0.0319  | 0.0147 | 0.0097 | 0.0093 | 0.0088 | 0.0112 | 0.0101 | 0.0099 | 0.0094 |
| 0       | 0      | 0      | 0      | 0      | 0      | 0      | 0      | 0      |
| 0.0001  | 0.0005 | 0.0011 | 0.0011 | 0.001  | 0.001  | 0.001  | 0.0008 | 0.0007 |
| 0.015   | 0.0062 | 0.0048 | 0.0038 | 0.0045 | 0.0048 | 0.0045 | 0.0038 | 0.0036 |
| 0       | 0      | 0      | 0      | 0      | 0      | 0      | 0      | 0      |
| 0       | 0      | 0      | 0      | 0      | 0      | 0      | 0      | 0      |
| 0       | 0      | 0      | 0      | 0      | 0      | 0      | 0      | 0      |
| 0       | 0      | 0      | 0      | 0      | 0      | 0      | 0      | 0      |
| 0       | 0      | 0      | 0      | 0      | 0      | 0      | 0      | 0      |
| 0       | 0      | 0      | 0      | 0      | 0      | 0      | 0      | 0      |
| 0       | 0      | 0      | 0      | 0      | 0      | 0      | 0      | 0      |
| 0       | 0      | 0      | 0      | 0      | 0      | 0      | 0      | 0      |
| 0       | 0      | 0      | 0      | 0      | 0      | 0      | 0      | 0      |
| 0       | 0      | 0      | 0      | 0      | 0      | 0      | 0      | 0      |
| 0       | 0      | 0      | 0      | 0      | 0      | 0      | 0      | 0      |
| 0       | 0      | 0      | 0      | 0      | 0      | 0      | 0      | 0      |
| 0       | 0      | 0      | 0      | 0      | 0      | 0      | 0      | 0      |
| 0       | 0      | 0      | 0      | 0      | 0      | 0      | 0      | 0      |
| 0.0011  | 0.0061 | 0.0092 | 0.0112 | 0.0102 | 0.0111 | 0.0131 | 0.0108 | 0.0113 |
| 0       | 0      | 0      | 0      | 0      | 0      | 0      | 0      | 0      |
| 0       | 0      | 0      | 0      | 0      | 0      | 0      | 0      | 0      |
| 0.0169  | 0.0171 | 0.0235 | 0.0258 | 0.0237 | 0.0256 | 0.0279 | 0.0226 | 0.0225 |
| 0.0219  | 0.0135 | 0.0144 | 0.0155 | 0.0142 | 0.0159 | 0.0166 | 0.0143 | 0.014  |
| 0       | 0      | 0      | 0      | 0      | 0      | 0      | 0      | 0      |
| 0       | 0      | 0      | 0      | 0      | 0      | 0      | 0      | 0      |
| 0.0395  | 0.0256 | 0.0267 | 0.0296 | 0.0282 | 0.0318 | 0.0329 | 0.028  | 0.0275 |
| 0.0236  | 0.058  | 0.0873 | 0.1026 | 0.0923 | 0.0979 | 0.1077 | 0.0895 | 0.0866 |
| 0.0186  | 0.0796 | 0.1355 | 0.1538 | 0.1509 | 0.1497 | 0.1554 | 0.1291 | 0.1339 |
| 0.0383  | 0.0706 | 0.1281 | 0.1404 | 0.1232 | 0.1234 | 0.1231 | 0.0922 | 0.0881 |
| 0.0645  | 0.1128 | 0.2161 | 0.2227 | 0.2068 | 0.2108 | 0.205  | 0.1398 | 0.1309 |
| 0.1092  | 0.1643 | 0.2793 | 0.277  | 0.2435 | 0.2393 | 0.2291 | 0.1826 | 0.1778 |
| 0.0563  | 0.115  | 0.2233 | 0.2198 | 0.1766 | 0.1647 | 0.1736 | 0.1394 | 0.1306 |
| 0.0134  | 0.0864 | 0.2076 | 0.1982 | 0.1821 | 0.1668 | 0.1731 | 0.1377 | 0.128  |
| 0.0865  | 0.1456 | 0.2425 | 0.2474 | 0.226  | 0.2163 | 0.2064 | 0.1621 | 0.153  |
| 0.0385  | 0.0837 | 0.1156 | 0.1301 | 0.112  | 0.1184 | 0.1263 | 0.1067 | 0.1095 |
| -0.0136 | 0.0591 | 0.1004 | 0.1437 | 0.1169 | 0.1349 | 0.1634 | 0.1437 | 0.1429 |
| 0.0272  | 0.0832 | 0.128  | 0.1526 | 0.13   | 0.1458 | 0.1624 | 0.1259 | 0.1339 |

|         |        |        |        |        |        |        |        |        |
|---------|--------|--------|--------|--------|--------|--------|--------|--------|
| -0.0112 | 0.0401 | 0.0724 | 0.1048 | 0.0989 | 0.1155 | 0.1393 | 0.118  | 0.1281 |
| 0.0884  | 0.0986 | 0.1363 | 0.1585 | 0.1413 | 0.1579 | 0.1744 | 0.1457 | 0.1461 |
| 0.1011  | 0.0982 | 0.1418 | 0.1531 | 0.1431 | 0.1492 | 0.1545 | 0.1289 | 0.1216 |
| 0.1302  | 0.1565 | 0.2736 | 0.2581 | 0.2387 | 0.2273 | 0.2361 | 0.1834 | 0.1797 |
| 0.2539  | 0.1862 | 0.2699 | 0.2673 | 0.2458 | 0.2476 | 0.2555 | 0.2045 | 0.1789 |
| 0.0824  | 0.0692 | 0.0961 | 0.0955 | 0.0872 | 0.0856 | 0.0871 | 0.0686 | 0.0655 |
| -0.0015 | 0.0068 | 0.009  | 0.0146 | 0.0127 | 0.0172 | 0.022  | 0.0187 | 0.0188 |
| 0.0382  | 0.0148 | 0.0109 | 0.0077 | 0.0074 | 0.0096 | 0.0101 | 0.0085 | 0.008  |
| 0.0741  | 0.0353 | 0.0314 | 0.0298 | 0.0282 | 0.0334 | 0.0356 | 0.0316 | 0.0249 |
| 0.0373  | 0.0209 | 0.0187 | 0.0205 | 0.0184 | 0.02   | 0.0216 | 0.0185 | 0.0193 |
| 0       | 0      | 0      | 0      | 0      | 0      | 0      | 0      | 0      |
| 0.0004  | 0.0013 | 0.0026 | 0.0026 | 0.0023 | 0.0022 | 0.0023 | 0.0018 | 0.0016 |
| 0.0007  | 0.0026 | 0.0048 | 0.0048 | 0.0043 | 0.0042 | 0.0043 | 0.0037 | 0.0037 |
| 0.0003  | 0.0014 | 0.0026 | 0.0028 | 0.0027 | 0.0028 | 0.0029 | 0.0024 | 0.0021 |
| 0.015   | 0.0061 | 0.0046 | 0.0046 | 0.0043 | 0.0043 | 0.0052 | 0.004  | 0.0038 |
| 0.0365  | 0.0152 | 0.0108 | 0.0091 | 0.0098 | 0.0114 | 0.0122 | 0.0103 | 0.0083 |
| 0.0076  | 0.0034 | 0.0023 | 0.0021 | 0.0024 | 0.0026 | 0.0027 | 0.0022 | 0.0018 |
| 0.0076  | 0.0038 | 0.0036 | 0.0033 | 0.0031 | 0.0033 | 0.0033 | 0.0028 | 0.0026 |
| 0.0088  | 0.0046 | 0.0043 | 0.0035 | 0.0029 | 0.0032 | 0.0028 | 0.0024 | 0.0022 |
| 0       | 0      | 0      | 0      | 0      | 0      | 0      | 0      | 0      |
| 0       | 0      | 0      | 0      | 0      | 0      | 0      | 0      | 0      |
| 0       | 0      | 0      | 0      | 0      | 0      | 0      | 0      | 0      |
| 0       | 0      | 0      | 0      | 0      | 0      | 0      | 0      | 0      |
| 0       | 0      | 0      | 0      | 0      | 0      | 0      | 0      | 0      |
| 0       | 0      | 0      | 0      | 0      | 0      | 0      | 0      | 0      |
| 0       | 0      | 0      | 0      | 0      | 0      | 0      | 0      | 0      |
| 0       | 0      | 0      | 0      | 0      | 0      | 0      | 0      | 0      |
| 0       | 0      | 0      | 0      | 0      | 0      | 0      | 0      | 0      |
| 0       | 0      | 0      | 0      | 0      | 0      | 0      | 0      | 0      |
| 0       | 0      | 0      | 0      | 0      | 0      | 0      | 0      | 0      |
| 0       | 0      | 0      | 0      | 0      | 0      | 0      | 0      | 0      |
| 0.0002  | 0.0011 | 0.0023 | 0.0022 | 0.002  | 0.0019 | 0.0019 | 0.0015 | 0.0015 |
| 0.0217  | 0.0107 | 0.0105 | 0.0107 | 0.0104 | 0.0123 | 0.0129 | 0.0117 | 0.0109 |
| 0.0921  | 0.0415 | 0.0412 | 0.0313 | 0.0301 | 0.0251 | 0.0249 | 0.0192 | 0.0152 |
| 0.0652  | 0.0352 | 0.0366 | 0.0344 | 0.0332 | 0.036  | 0.0357 | 0.0274 | 0.0281 |
| -0.0036 | 0.012  | 0.0224 | 0.0362 | 0.0335 | 0.0391 | 0.0409 | 0.0336 | 0.0334 |
| 0.0065  | 0.015  | 0.025  | 0.0243 | 0.0224 | 0.0215 | 0.022  | 0.0174 | 0.0174 |
| 0.025   | 0.0195 | 0.0281 | 0.0284 | 0.0258 | 0.0258 | 0.0255 | 0.0209 | 0.0194 |
| 0.0708  | 0.0586 | 0.0565 | 0.0735 | 0.0672 | 0.0812 | 0.0889 | 0.0819 | 0.0803 |
| 0.0398  | 0.0275 | 0.027  | 0.0327 | 0.0296 | 0.0332 | 0.0453 | 0.0371 | 0.0396 |
| 0.0591  | 0.0522 | 0.0793 | 0.0838 | 0.0766 | 0.0797 | 0.0831 | 0.0667 | 0.0655 |
| 0.0852  | 0.1189 | 0.1929 | 0.195  | 0.1749 | 0.1707 | 0.1837 | 0.1496 | 0.141  |
| 0.0332  | 0.087  | 0.1592 | 0.1761 | 0.1591 | 0.1663 | 0.1765 | 0.1308 | 0.1355 |
| 0.0546  | 0.1229 | 0.2384 | 0.2466 | 0.2249 | 0.2057 | 0.2137 | 0.1658 | 0.1468 |
| 0.0429  | 0.1237 | 0.2249 | 0.2314 | 0.2009 | 0.1981 | 0.2046 | 0.1564 | 0.1414 |

|         |        |        |        |        |        |        |        |        |
|---------|--------|--------|--------|--------|--------|--------|--------|--------|
| 0.0664  | 0.1113 | 0.1862 | 0.1896 | 0.1798 | 0.1773 | 0.1768 | 0.1399 | 0.1332 |
| 0.0316  | 0.0613 | 0.1115 | 0.1206 | 0.1101 | 0.1107 | 0.1148 | 0.0924 | 0.0938 |
| 0.0373  | 0.0964 | 0.16   | 0.1572 | 0.1418 | 0.1419 | 0.1451 | 0.1211 | 0.1049 |
| 0.0236  | 0.0876 | 0.1356 | 0.1612 | 0.1492 | 0.1519 | 0.1595 | 0.1431 | 0.1424 |
| 0.0422  | 0.0871 | 0.1507 | 0.1682 | 0.1419 | 0.1503 | 0.154  | 0.1234 | 0.1336 |
| 0.0349  | 0.0799 | 0.1444 | 0.1633 | 0.1411 | 0.1426 | 0.1431 | 0.1057 | 0.1042 |
| 0.0588  | 0.0869 | 0.1402 | 0.1564 | 0.1443 | 0.1504 | 0.1601 | 0.1336 | 0.1307 |
| 0.0896  | 0.1141 | 0.1889 | 0.1897 | 0.1719 | 0.1674 | 0.1703 | 0.1347 | 0.1344 |
| 0.0637  | 0.0828 | 0.123  | 0.1364 | 0.1215 | 0.1272 | 0.1364 | 0.1101 | 0.1092 |
| 0.0377  | 0.0681 | 0.1267 | 0.1378 | 0.1227 | 0.1308 | 0.134  | 0.1121 | 0.1063 |
| 0.1803  | 0.1474 | 0.2192 | 0.2272 | 0.2171 | 0.207  | 0.211  | 0.1659 | 0.1622 |
| 0.1851  | 0.1581 | 0.2123 | 0.2141 | 0.1881 | 0.1807 | 0.1686 | 0.1259 | 0.1167 |
| 0.0418  | 0.0375 | 0.0527 | 0.0571 | 0.0517 | 0.0552 | 0.0562 | 0.0468 | 0.0453 |
| 0.0634  | 0.0365 | 0.0329 | 0.0378 | 0.0346 | 0.0411 | 0.0471 | 0.0399 | 0.039  |
| 0.2096  | 0.1072 | 0.104  | 0.1026 | 0.1002 | 0.1152 | 0.1134 | 0.0945 | 0.095  |
| 0.1913  | 0.0891 | 0.0681 | 0.0614 | 0.0585 | 0.0729 | 0.0756 | 0.075  | 0.0752 |
| 0.0418  | 0.0141 | 0.0089 | 0.0064 | 0.0052 | 0.0058 | 0.0054 | 0.0059 | 0.0081 |
| 0.0436  | 0.0409 | 0.0603 | 0.065  | 0.0602 | 0.0613 | 0.0624 | 0.0515 | 0.0503 |
| 0.0007  | 0.0027 | 0.0054 | 0.0058 | 0.0052 | 0.0053 | 0.0056 | 0.0046 | 0.0042 |
| 0.0006  | 0.0017 | 0.0028 | 0.0029 | 0.0025 | 0.0026 | 0.0028 | 0.0023 | 0.0022 |
| 0.0002  | 0.0006 | 0.0005 | 0.0008 | 0.0008 | 0.0009 | 0.001  | 0.0009 | 0.0011 |
| 0       | 0      | 0      | 0      | 0      | 0      | 0      | 0      | 0      |
| 0       | 0      | 0      | 0      | 0      | 0      | 0      | 0      | 0      |
| 0.0003  | 0.0007 | 0.0012 | 0.0012 | 0.001  | 0.001  | 0.0009 | 0.0007 | 0.0006 |
| 0.0139  | 0.0058 | 0.0037 | 0.0035 | 0.003  | 0.0037 | 0.0035 | 0.0029 | 0.0021 |
| 0       | 0      | 0      | 0      | 0      | 0      | 0      | 0      | 0      |
| 0       | 0      | 0      | 0      | 0      | 0      | 0      | 0      | 0      |
| 0       | 0      | 0      | 0      | 0      | 0      | 0      | 0      | 0      |
| 0       | 0      | 0      | 0      | 0      | 0      | 0      | 0      | 0      |
| 0       | 0      | 0      | 0      | 0      | 0      | 0      | 0      | 0      |
| 0       | 0      | 0      | 0      | 0      | 0      | 0      | 0      | 0      |
| 0       | 0      | 0      | 0      | 0      | 0      | 0      | 0      | 0      |
| 0       | 0      | 0      | 0      | 0      | 0      | 0      | 0      | 0      |
| 0       | 0      | 0      | 0      | 0      | 0      | 0      | 0      | 0      |
| 0       | 0      | 0      | 0      | 0      | 0      | 0      | 0      | 0      |
| 0       | 0      | 0      | 0      | 0      | 0      | 0      | 0      | 0      |
| 0.0877  | 0.0386 | 0.0337 | 0.0329 | 0.0321 | 0.0348 | 0.0359 | 0.0306 | 0.0301 |
| 0       | 0      | 0      | 0      | 0      | 0      | 0      | 0      | 0      |
| -0.0008 | 0.0015 | 0.0018 | 0.0037 | 0.0036 | 0.0044 | 0.0053 | 0.0045 | 0.0048 |
| 0.0002  | 0.0044 | 0.005  | 0.0074 | 0.0072 | 0.0077 | 0.0096 | 0.0082 | 0.0086 |
| 0.0676  | 0.0412 | 0.0509 | 0.0505 | 0.0496 | 0.0515 | 0.0537 | 0.0459 | 0.0448 |
| 0.1854  | 0.1104 | 0.1242 | 0.1317 | 0.1289 | 0.1332 | 0.137  | 0.1148 | 0.1159 |
| 0.1976  | 0.1252 | 0.1357 | 0.1448 | 0.1347 | 0.1509 | 0.1602 | 0.1334 | 0.1292 |
| 0.1273  | 0.0764 | 0.0851 | 0.0853 | 0.0811 | 0.0929 | 0.096  | 0.0802 | 0.0777 |



|         |        |        |        |        |        |        |        |        |
|---------|--------|--------|--------|--------|--------|--------|--------|--------|
| 0.0608  | 0.0729 | 0.1141 | 0.1194 | 0.1105 | 0.1096 | 0.1136 | 0.1007 | 0.1006 |
| 0.0427  | 0.0649 | 0.1208 | 0.1321 | 0.1276 | 0.1178 | 0.121  | 0.0938 | 0.0817 |
| 0.0525  | 0.1077 | 0.1791 | 0.1851 | 0.166  | 0.1737 | 0.1816 | 0.1316 | 0.1309 |
| 0.029   | 0.0937 | 0.1625 | 0.1804 | 0.1618 | 0.1759 | 0.1961 | 0.1628 | 0.149  |
| 0.0391  | 0.1025 | 0.2045 | 0.2116 | 0.1787 | 0.1832 | 0.1936 | 0.1568 | 0.1458 |
| 0.0898  | 0.1374 | 0.2458 | 0.2514 | 0.2276 | 0.2248 | 0.2283 | 0.1861 | 0.1608 |
| 0.067   | 0.1039 | 0.1835 | 0.1888 | 0.1839 | 0.1835 | 0.1846 | 0.1546 | 0.1477 |
| -0.0272 | 0.0315 | 0.0776 | 0.1086 | 0.1025 | 0.1159 | 0.127  | 0.1053 | 0.1107 |
| 0.019   | 0.0656 | 0.1198 | 0.1371 | 0.1248 | 0.1249 | 0.1281 | 0.0988 | 0.0977 |
| 0.0181  | 0.0769 | 0.1335 | 0.1599 | 0.14   | 0.1472 | 0.1579 | 0.1253 | 0.1414 |
| 0.0465  | 0.0877 | 0.1491 | 0.1615 | 0.1414 | 0.1513 | 0.1594 | 0.131  | 0.1276 |
| 0.0386  | 0.0799 | 0.1295 | 0.1432 | 0.1277 | 0.13   | 0.1393 | 0.1185 | 0.1201 |
| 0.0192  | 0.0916 | 0.1325 | 0.1508 | 0.1341 | 0.1396 | 0.1539 | 0.1251 | 0.1284 |
| 0.0059  | 0.0519 | 0.0937 | 0.1165 | 0.1082 | 0.1167 | 0.1302 | 0.1082 | 0.1107 |
| 0.0327  | 0.0699 | 0.0798 | 0.1225 | 0.1047 | 0.135  | 0.152  | 0.1235 | 0.1175 |
| 0.0571  | 0.0864 | 0.0854 | 0.121  | 0.1136 | 0.142  | 0.1599 | 0.1491 | 0.163  |
| 0.0085  | 0.0446 | 0.081  | 0.09   | 0.0775 | 0.0863 | 0.0979 | 0.0893 | 0.0902 |
| 0.1783  | 0.1636 | 0.2407 | 0.2343 | 0.2071 | 0.2064 | 0.2096 | 0.1609 | 0.1561 |
| 0.0168  | 0.076  | 0.1546 | 0.1644 | 0.1425 | 0.1395 | 0.1495 | 0.1216 | 0.1135 |
| 0.0018  | 0.0305 | 0.0417 | 0.057  | 0.0554 | 0.0629 | 0.0796 | 0.0719 | 0.0709 |
| 0.2421  | 0.1074 | 0.0864 | 0.0941 | 0.0895 | 0.1008 | 0.1083 | 0.0886 | 0.0948 |
| 0.2806  | 0.1293 | 0.0933 | 0.0986 | 0.0913 | 0.097  | 0.0981 | 0.0709 | 0.0543 |
| 0.1482  | 0.0768 | 0.0714 | 0.0715 | 0.0744 | 0.0813 | 0.0827 | 0.0724 | 0.0677 |
| 0.2099  | 0.1024 | 0.0996 | 0.1043 | 0.097  | 0.1082 | 0.1021 | 0.0846 | 0.0861 |
| 0.0824  | 0.0355 | 0.0364 | 0.0315 | 0.0292 | 0.0328 | 0.0325 | 0.0252 | 0.0258 |
| 0.0003  | 0.0014 | 0.0028 | 0.003  | 0.0027 | 0.0029 | 0.0029 | 0.0023 | 0.0024 |
| 0       | 0.0003 | 0.0004 | 0.0006 | 0.0006 | 0.0008 | 0.0009 | 0.0009 | 0.0009 |
| 0       | 0      | 0      | 0      | 0      | 0      | 0      | 0      | 0      |
| 0       | 0      | 0      | 0      | 0      | 0      | 0      | 0      | 0      |
| 0.0002  | 0.0006 | 0.0012 | 0.0012 | 0.0011 | 0.0011 | 0.001  | 0.0009 | 0.0009 |
| 0.0158  | 0.0071 | 0.0061 | 0.0058 | 0.0059 | 0.0058 | 0.0058 | 0.0048 | 0.0041 |
| 0.0166  | 0.007  | 0.0052 | 0.0049 | 0.0046 | 0.0053 | 0.0047 | 0.0042 | 0.0041 |
| 0       | 0      | 0      | 0      | 0      | 0      | 0      | 0      | 0      |
| 0       | 0      | 0      | 0      | 0      | 0      | 0      | 0      | 0      |
| 0       | 0      | 0      | 0      | 0      | 0      | 0      | 0      | 0      |
| 0       | 0      | 0      | 0      | 0      | 0      | 0      | 0      | 0      |
| 0       | 0      | 0      | 0      | 0      | 0      | 0      | 0      | 0      |
| 0       | 0      | 0      | 0      | 0      | 0      | 0      | 0      | 0      |
| 0       | 0      | 0      | 0      | 0      | 0      | 0      | 0      | 0      |
| 0       | 0      | 0      | 0      | 0      | 0      | 0      | 0      | 0      |
| 0       | 0      | 0      | 0      | 0      | 0      | 0      | 0      | 0      |
| 0       | 0      | 0      | 0      | 0      | 0      | 0      | 0      | 0      |
| 0       | 0      | 0      | 0      | 0      | 0      | 0      | 0      | 0      |
| 0.0097  | 0.0115 | 0.0181 | 0.0186 | 0.0172 | 0.0175 | 0.0177 | 0.0143 | 0.0137 |



|         |        |        |        |        |        |        |        |        |
|---------|--------|--------|--------|--------|--------|--------|--------|--------|
| 0       | 0      | 0      | 0      | 0      | 0      | 0      | 0      | 0      |
| 0       | 0      | 0      | 0      | 0      | 0      | 0      | 0      | 0      |
| 0       | 0      | 0      | 0      | 0      | 0      | 0      | 0      | 0      |
| 0       | 0      | 0      | 0      | 0      | 0      | 0      | 0      | 0      |
| 0       | 0      | 0      | 0      | 0      | 0      | 0      | 0      | 0      |
| 0.0038  | 0.0082 | 0.0145 | 0.0144 | 0.0125 | 0.0122 | 0.0124 | 0.0099 | 0.009  |
| 0       | 0      | 0      | 0      | 0      | 0      | 0      | 0      | 0      |
| 0.0351  | 0.0311 | 0.0411 | 0.0431 | 0.0398 | 0.042  | 0.0442 | 0.0361 | 0.0352 |
| 0.1189  | 0.0947 | 0.1256 | 0.1322 | 0.1204 | 0.1255 | 0.1321 | 0.1078 | 0.1036 |
| 0.1494  | 0.0807 | 0.0844 | 0.0708 | 0.069  | 0.072  | 0.0691 | 0.0546 | 0.0535 |
| 0.0701  | 0.0363 | 0.0341 | 0.0376 | 0.0351 | 0.0409 | 0.0456 | 0.04   | 0.0376 |
| 0.0581  | 0.1226 | 0.1611 | 0.2027 | 0.1838 | 0.184  | 0.2024 | 0.1696 | 0.1639 |
| 0.013   | 0.0743 | 0.1225 | 0.1512 | 0.137  | 0.1525 | 0.1599 | 0.1532 | 0.1623 |
| 0.1237  | 0.1147 | 0.1682 | 0.1803 | 0.1674 | 0.1764 | 0.1856 | 0.1507 | 0.1485 |
| 0.175   | 0.1203 | 0.1423 | 0.1572 | 0.1452 | 0.1576 | 0.1639 | 0.1346 | 0.1276 |
| 0.1752  | 0.137  | 0.1757 | 0.1848 | 0.1661 | 0.1755 | 0.1802 | 0.1488 | 0.1435 |
| 0.142   | 0.1016 | 0.1128 | 0.1231 | 0.1141 | 0.1262 | 0.1345 | 0.1103 | 0.1108 |
| 0.1407  | 0.1217 | 0.1567 | 0.1685 | 0.153  | 0.1651 | 0.1708 | 0.1403 | 0.1372 |
| 0.1027  | 0.1235 | 0.1901 | 0.2009 | 0.1941 | 0.1936 | 0.1985 | 0.1608 | 0.1611 |
| 0.0186  | 0.0785 | 0.1519 | 0.1676 | 0.1565 | 0.158  | 0.1619 | 0.1335 | 0.1446 |
| 0.0397  | 0.0764 | 0.1312 | 0.1512 | 0.1354 | 0.1423 | 0.1456 | 0.1113 | 0.1098 |
| 0.0259  | 0.064  | 0.1081 | 0.1314 | 0.1157 | 0.1233 | 0.1367 | 0.1163 | 0.1189 |
| 0.0059  | 0.0689 | 0.1282 | 0.1427 | 0.1287 | 0.1426 | 0.1472 | 0.1298 | 0.125  |
| 0.0258  | 0.0818 | 0.1439 | 0.1661 | 0.1517 | 0.16   | 0.1687 | 0.1428 | 0.1389 |
| 0.094   | 0.1552 | 0.2397 | 0.2477 | 0.2209 | 0.2093 | 0.1968 | 0.1497 | 0.1319 |
| 0.1215  | 0.143  | 0.24   | 0.2477 | 0.2297 | 0.2204 | 0.2214 | 0.176  | 0.1709 |
| 0.1272  | 0.1587 | 0.2639 | 0.25   | 0.2345 | 0.2236 | 0.2247 | 0.1731 | 0.1532 |
| 0.0745  | 0.1119 | 0.1955 | 0.207  | 0.188  | 0.1838 | 0.1841 | 0.1375 | 0.1312 |
| 0.2027  | 0.1736 | 0.2455 | 0.2486 | 0.2323 | 0.2364 | 0.2327 | 0.1842 | 0.1747 |
| 0.1743  | 0.1379 | 0.1827 | 0.1849 | 0.1691 | 0.175  | 0.1787 | 0.1485 | 0.141  |
| 0.0761  | 0.1075 | 0.156  | 0.1884 | 0.1636 | 0.1741 | 0.1864 | 0.1617 | 0.1591 |
| -0.0108 | 0.06   | 0.0641 | 0.1264 | 0.1008 | 0.1389 | 0.1675 | 0.1374 | 0.1756 |
| 0.0742  | 0.0754 | 0.0814 | 0.1221 | 0.1033 | 0.1385 | 0.1616 | 0.1342 | 0.1475 |
| 0.2169  | 0.1258 | 0.1264 | 0.1419 | 0.1295 | 0.1464 | 0.16   | 0.1427 | 0.1399 |
| 0.2437  | 0.1066 | 0.0878 | 0.0962 | 0.0813 | 0.1025 | 0.1008 | 0.0884 | 0.0771 |
| 0.3545  | 0.1404 | 0.1088 | 0.0859 | 0.0889 | 0.1047 | 0.1005 | 0.0761 | 0.0718 |
| 0.1606  | 0.064  | 0.0418 | 0.0391 | 0.0393 | 0.0522 | 0.06   | 0.0466 | 0.0438 |
| 0.0506  | 0.0211 | 0.0165 | 0.0151 | 0.0131 | 0.0134 | 0.0154 | 0.0112 | 0.0104 |
| 0       | 0.0004 | 0.0004 | 0.0006 | 0.0006 | 0.0007 | 0.0009 | 0.0008 | 0.0008 |
| 0.016   | 0.0069 | 0.0057 | 0.0051 | 0.0049 | 0.0052 | 0.0058 | 0.0055 | 0.005  |
| 0       | 0      | 0      | 0      | 0      | 0      | 0      | 0      | 0      |
| 0.0003  | 0.0007 | 0.0012 | 0.0012 | 0.0012 | 0.0012 | 0.0011 | 0.0008 | 0.0008 |
| 0.0001  | 0.0005 | 0.001  | 0.0011 | 0.001  | 0.001  | 0.001  | 0.0007 | 0.0007 |
| 0.0076  | 0.0033 | 0.0024 | 0.0018 | 0.0019 | 0.0021 | 0.002  | 0.0015 | 0.0013 |

|         |        |        |        |        |        |        |        |        |   |
|---------|--------|--------|--------|--------|--------|--------|--------|--------|---|
| 0       | 0      | 0      | 0      | 0      | 0      | 0      | 0      | 0      | 0 |
| 0       | 0      | 0      | 0      | 0      | 0      | 0      | 0      | 0      | 0 |
| 0       | 0      | 0      | 0      | 0      | 0      | 0      | 0      | 0      | 0 |
| 0       | 0      | 0      | 0      | 0      | 0      | 0      | 0      | 0      | 0 |
| 0       | 0      | 0      | 0      | 0      | 0      | 0      | 0      | 0      | 0 |
| 0       | 0      | 0      | 0      | 0      | 0      | 0      | 0      | 0      | 0 |
| 0       | 0      | 0      | 0      | 0      | 0      | 0      | 0      | 0      | 0 |
| 0       | 0      | 0      | 0      | 0      | 0      | 0      | 0      | 0      | 0 |
| 0       | 0      | 0      | 0      | 0      | 0      | 0      | 0      | 0      | 0 |
| 0       | 0      | 0      | 0      | 0      | 0      | 0      | 0      | 0      | 0 |
| 0.0084  | 0.008  | 0.0109 | 0.0127 | 0.0117 | 0.013  | 0.0146 | 0.0123 | 0.0118 |   |
| -0.0005 | 0.001  | 0.0015 | 0.0021 | 0.002  | 0.0024 | 0.003  | 0.0027 | 0.0031 |   |
| 0       | 0      | 0      | 0      | 0      | 0      | 0      | 0      | 0      |   |
| 0.0037  | 0.0237 | 0.0385 | 0.0467 | 0.0431 | 0.0476 | 0.0504 | 0.0396 | 0.039  |   |
| 0.0976  | 0.079  | 0.091  | 0.1055 | 0.1019 | 0.1165 | 0.1218 | 0.1041 | 0.1035 |   |
| 0.2571  | 0.1213 | 0.0988 | 0.0978 | 0.1038 | 0.1241 | 0.1399 | 0.1215 | 0.1193 |   |
| 0.4663  | 0.2209 | 0.1829 | 0.1853 | 0.1905 | 0.207  | 0.2061 | 0.1627 | 0.1299 |   |
| 0.5069  | 0.2287 | 0.2362 | 0.2388 | 0.2261 | 0.2684 | 0.2657 | 0.2061 | 0.2008 |   |
| 0.0101  | 0.0718 | 0.1188 | 0.1499 | 0.1426 | 0.159  | 0.1635 | 0.1395 | 0.1463 |   |
| 0.2529  | 0.1562 | 0.1806 | 0.1788 | 0.1713 | 0.1798 | 0.1861 | 0.1486 | 0.1374 |   |
| 0.4391  | 0.2019 | 0.2045 | 0.1933 | 0.1924 | 0.2104 | 0.2088 | 0.1765 | 0.1528 |   |
| 0.4001  | 0.2717 | 0.3494 | 0.3412 | 0.3161 | 0.3182 | 0.3156 | 0.2459 | 0.2314 |   |
| 0.1853  | 0.1682 | 0.2428 | 0.2471 | 0.2305 | 0.2385 | 0.2468 | 0.2027 | 0.1987 |   |
| 0.0581  | 0.1224 | 0.2194 | 0.2181 | 0.1982 | 0.1985 | 0.2096 | 0.1509 | 0.1365 |   |
| 0.1062  | 0.1479 | 0.2426 | 0.2446 | 0.2227 | 0.2254 | 0.2352 | 0.1748 | 0.1549 |   |
| 0.0785  | 0.1175 | 0.2077 | 0.2128 | 0.2004 | 0.1973 | 0.2033 | 0.1697 | 0.1572 |   |
| 0.0455  | 0.101  | 0.1802 | 0.1843 | 0.1603 | 0.1498 | 0.1591 | 0.1222 | 0.1112 |   |
| 0.0398  | 0.1157 | 0.1891 | 0.2095 | 0.1839 | 0.1795 | 0.1856 | 0.1488 | 0.1393 |   |
| 0.049   | 0.0913 | 0.1706 | 0.1682 | 0.1619 | 0.1611 | 0.1712 | 0.1443 | 0.1402 |   |
| 0.143   | 0.1538 | 0.2213 | 0.2314 | 0.2075 | 0.2001 | 0.204  | 0.1688 | 0.1607 |   |
| 0.2218  | 0.1563 | 0.2057 | 0.1997 | 0.1856 | 0.1907 | 0.1857 | 0.1484 | 0.1325 |   |
| 0.2568  | 0.1972 | 0.277  | 0.2674 | 0.2579 | 0.2531 | 0.2495 | 0.2005 | 0.1871 |   |
| 0.1393  | 0.1546 | 0.2481 | 0.243  | 0.2114 | 0.2086 | 0.2124 | 0.1662 | 0.1597 |   |
| 0.0268  | 0.0987 | 0.205  | 0.2071 | 0.1868 | 0.1798 | 0.1691 | 0.1352 | 0.1294 |   |
| 0.2583  | 0.1624 | 0.24   | 0.2321 | 0.2148 | 0.2175 | 0.2088 | 0.1741 | 0.1612 |   |
| 0.0996  | 0.151  | 0.2666 | 0.2807 | 0.2492 | 0.2372 | 0.2342 | 0.1865 | 0.1642 |   |
| 0.0422  | 0.095  | 0.1572 | 0.1814 | 0.1677 | 0.1798 | 0.188  | 0.1521 | 0.153  |   |
| 0.0879  | 0.1273 | 0.1425 | 0.1896 | 0.1674 | 0.179  | 0.2088 | 0.1741 | 0.1784 |   |
| -0.004  | 0.0621 | 0.0817 | 0.1233 | 0.1187 | 0.1543 | 0.1707 | 0.151  | 0.1517 |   |
| 0.0486  | 0.0697 | 0.0929 | 0.1406 | 0.138  | 0.1786 | 0.2046 | 0.1822 | 0.1788 |   |
| 0.1635  | 0.1103 | 0.1064 | 0.1413 | 0.1372 | 0.1745 | 0.1867 | 0.163  | 0.1644 |   |
| 0.1441  | 0.0857 | 0.0764 | 0.0809 | 0.0753 | 0.0816 | 0.0926 | 0.0791 | 0.0752 |   |
| 0.0749  | 0.0306 | 0.0272 | 0.022  | 0.0209 | 0.0228 | 0.0251 | 0.0227 | 0.0222 |   |
| 0.0004  | 0.0014 | 0.0027 | 0.0029 | 0.0026 | 0.0027 | 0.0031 | 0.0025 | 0.0023 |   |

|         |        |        |        |        |        |        |        |        |
|---------|--------|--------|--------|--------|--------|--------|--------|--------|
| -0.0001 | 0.0002 | 0.0003 | 0.0006 | 0.0005 | 0.0007 | 0.0008 | 0.0007 | 0.0008 |
| 0       | 0      | 0      | 0      | 0      | 0      | 0      | 0      | 0      |
| 0       | 0      | 0      | 0      | 0      | 0      | 0      | 0      | 0      |
| 0.0002  | 0.0005 | 0.0011 | 0.0011 | 0.001  | 0.0009 | 0.0009 | 0.0007 | 0.0007 |
| 0.0001  | 0.0005 | 0.0011 | 0.0011 | 0.0009 | 0.0009 | 0.0009 | 0.0007 | 0.0006 |
| 0.0072  | 0.0026 | 0.0021 | 0.0019 | 0.0018 | 0.0016 | 0.0014 | 0.0008 | 0.0007 |
| 0       | 0      | 0      | 0      | 0      | 0      | 0      | 0      | 0      |
| 0       | 0      | 0      | 0      | 0      | 0      | 0      | 0      | 0      |
| 0.0002  | 0.0018 | 0.0023 | 0.0032 | 0.003  | 0.0031 | 0.0038 | 0.0031 | 0.0031 |
| 0       | 0      | 0      | 0      | 0      | 0      | 0      | 0      | 0      |
| 0       | 0      | 0      | 0      | 0      | 0      | 0      | 0      | 0      |
| 0.0002  | 0.0005 | 0.0011 | 0.001  | 0.0009 | 0.0009 | 0.0009 | 0.0006 | 0.0005 |
| -0.0001 | 0.0029 | 0.005  | 0.0067 | 0.0061 | 0.0076 | 0.0086 | 0.0072 | 0.0079 |
| 0.0004  | 0.0022 | 0.0034 | 0.0042 | 0.0038 | 0.0042 | 0.0047 | 0.0038 | 0.0037 |
| 0       | 0.0003 | 0.0004 | 0.0007 | 0.0007 | 0.0009 | 0.0011 | 0.001  | 0.001  |
| 0.0004  | 0.0021 | 0.0025 | 0.0043 | 0.0034 | 0.0042 | 0.0057 | 0.0049 | 0.0052 |
| 0       | 0      | 0      | 0      | 0      | 0      | 0      | 0      | 0      |
| 0.0813  | 0.0349 | 0.0321 | 0.029  | 0.0283 | 0.0367 | 0.0375 | 0.0339 | 0.0324 |
| 0.0001  | 0.0006 | 0.0006 | 0.0013 | 0.0011 | 0.0015 | 0.0018 | 0.0016 | 0.0019 |
| 0.1476  | 0.0755 | 0.0726 | 0.0791 | 0.0723 | 0.0791 | 0.0837 | 0.0757 | 0.0735 |
| 0.0673  | 0.036  | 0.0294 | 0.0371 | 0.035  | 0.0405 | 0.0452 | 0.0397 | 0.04   |
| 0.1654  | 0.0712 | 0.0625 | 0.0591 | 0.0632 | 0.0616 | 0.0709 | 0.0588 | 0.0526 |
| 0.204   | 0.0969 | 0.0823 | 0.085  | 0.0928 | 0.11   | 0.1258 | 0.115  | 0.1069 |
| 0.8579  | 0.4117 | 0.3042 | 0.2822 | 0.2464 | 0.2525 | 0.249  | 0.2154 | 0.1943 |
| 0.9002  | 0.3916 | 0.3889 | 0.3482 | 0.3567 | 0.3989 | 0.3699 | 0.2847 | 0.2464 |
| 0.4544  | 0.264  | 0.2582 | 0.2534 | 0.2487 | 0.2809 | 0.2709 | 0.2107 | 0.1845 |
| 0.0971  | 0.1124 | 0.1629 | 0.1718 | 0.1601 | 0.1718 | 0.1758 | 0.1494 | 0.1367 |
| 0.1352  | 0.1512 | 0.236  | 0.2244 | 0.2053 | 0.2009 | 0.1949 | 0.1494 | 0.142  |
| 0.134   | 0.119  | 0.2056 | 0.2058 | 0.1863 | 0.1791 | 0.1803 | 0.1513 | 0.1409 |
| 0.0791  | 0.1442 | 0.2575 | 0.2447 | 0.2278 | 0.2239 | 0.2113 | 0.1791 | 0.1684 |
| 0.0385  | 0.1067 | 0.219  | 0.2299 | 0.2054 | 0.2024 | 0.2043 | 0.1594 | 0.1591 |
| 0.122   | 0.1765 | 0.2762 | 0.2655 | 0.2366 | 0.2339 | 0.2298 | 0.1694 | 0.161  |
| 0.0502  | 0.1389 | 0.2505 | 0.255  | 0.2264 | 0.2109 | 0.2239 | 0.1801 | 0.164  |
| 0.1182  | 0.1363 | 0.2369 | 0.2432 | 0.2293 | 0.2177 | 0.219  | 0.1707 | 0.1603 |
| 0.0314  | 0.0948 | 0.1953 | 0.1862 | 0.1619 | 0.1599 | 0.1807 | 0.1319 | 0.1292 |
| 0.0691  | 0.1067 | 0.1797 | 0.1853 | 0.1592 | 0.1414 | 0.1544 | 0.1195 | 0.1175 |
| 0.5641  | 0.3075 | 0.298  | 0.2651 | 0.2609 | 0.2594 | 0.2755 | 0.2309 | 0.2101 |
| 0.3503  | 0.2151 | 0.2823 | 0.2709 | 0.2534 | 0.2456 | 0.2525 | 0.2036 | 0.1957 |
| 0.0278  | 0.0822 | 0.1558 | 0.159  | 0.1491 | 0.1462 | 0.1543 | 0.1136 | 0.1144 |
| 0.2353  | 0.1654 | 0.2298 | 0.2234 | 0.2089 | 0.21   | 0.2041 | 0.1636 | 0.1595 |
| 0.274   | 0.1994 | 0.2696 | 0.2546 | 0.2409 | 0.2481 | 0.2509 | 0.1979 | 0.1752 |
| 0.0333  | 0.0993 | 0.1919 | 0.193  | 0.1711 | 0.1688 | 0.1593 | 0.1193 | 0.115  |
| 0.1401  | 0.1505 | 0.2226 | 0.2398 | 0.2228 | 0.2255 | 0.2336 | 0.1876 | 0.1789 |
| 0.055   | 0.098  | 0.1301 | 0.1493 | 0.1319 | 0.1467 | 0.1488 | 0.118  | 0.1248 |

|         |        |        |        |        |        |        |        |        |
|---------|--------|--------|--------|--------|--------|--------|--------|--------|
| -0.0206 | 0.0502 | 0.0597 | 0.0931 | 0.0856 | 0.1209 | 0.1428 | 0.1386 | 0.1239 |
| 0.0887  | 0.1013 | 0.1247 | 0.157  | 0.1427 | 0.1669 | 0.1778 | 0.1624 | 0.161  |
| -0.0042 | 0.05   | 0.087  | 0.1402 | 0.1324 | 0.1551 | 0.1856 | 0.1604 | 0.1616 |
| 0.0914  | 0.0852 | 0.1    | 0.1252 | 0.1154 | 0.1291 | 0.141  | 0.1243 | 0.119  |
| 0.1189  | 0.0654 | 0.0757 | 0.0724 | 0.0672 | 0.0725 | 0.0738 | 0.0643 | 0.0542 |
| 0.0496  | 0.0239 | 0.0239 | 0.0204 | 0.0189 | 0.0225 | 0.0224 | 0.0204 | 0.0165 |
| -0.0003 | 0.0004 | 0.0006 | 0.001  | 0.0009 | 0.0012 | 0.0015 | 0.0011 | 0.0011 |
| 0.0001  | 0.0015 | 0.0034 | 0.0036 | 0.0033 | 0.0035 | 0.0036 | 0.0029 | 0.0029 |
| 0.0591  | 0.0251 | 0.0198 | 0.0186 | 0.0202 | 0.0227 | 0.0239 | 0.0241 | 0.0208 |
| 0.0332  | 0.0205 | 0.0225 | 0.0213 | 0.0211 | 0.0194 | 0.0206 | 0.0172 | 0.016  |
| 0.0015  | 0.0046 | 0.0101 | 0.0105 | 0.0094 | 0.0093 | 0.0087 | 0.0068 | 0.0066 |
| 0.0811  | 0.0319 | 0.0236 | 0.0208 | 0.0209 | 0.0222 | 0.0249 | 0.0201 | 0.0231 |
| 0       | 0      | 0      | 0      | 0      | 0      | 0      | 0      | 0      |
| 0       | 0      | 0      | 0      | 0      | 0      | 0      | 0      | 0      |
| 0       | 0      | 0      | 0      | 0      | 0      | 0      | 0      | 0      |
| -0.0002 | 0.0001 | 0.0002 | 0.0004 | 0.0005 | 0.0006 | 0.0006 | 0.0006 | 0.0007 |
| -0.0001 | 0.0003 | 0.0004 | 0.0006 | 0.0004 | 0.0006 | 0.0007 | 0.0006 | 0.0007 |
| 0       | 0.0006 | 0.0006 | 0.0012 | 0.0011 | 0.0012 | 0.0013 | 0.0012 | 0.0012 |
| 0.0005  | 0.0023 | 0.0033 | 0.0042 | 0.0042 | 0.0047 | 0.005  | 0.0041 | 0.0038 |
| 0.0006  | 0.0014 | 0.0026 | 0.0023 | 0.0021 | 0.002  | 0.0019 | 0.0013 | 0.0013 |
| 0.0003  | 0.0007 | 0.0012 | 0.0012 | 0.001  | 0.001  | 0.0011 | 0.0008 | 0.0008 |
| 0.0003  | 0.0007 | 0.0013 | 0.0012 | 0.0011 | 0.0011 | 0.0011 | 0.0009 | 0.0008 |
| 0.003   | 0.0076 | 0.0133 | 0.0128 | 0.0118 | 0.0103 | 0.0104 | 0.0084 | 0.0072 |
| 0       | 0      | 0      | 0      | 0      | 0      | 0      | 0      | 0      |
| 0.0356  | 0.0129 | 0.0097 | 0.0099 | 0.0117 | 0.0123 | 0.0113 | 0.0096 | 0.0095 |
| 0.0029  | 0.0138 | 0.029  | 0.0287 | 0.0259 | 0.0246 | 0.0234 | 0.0181 | 0.0158 |
| 0.6565  | 0.2717 | 0.2035 | 0.1989 | 0.2343 | 0.233  | 0.2102 | 0.1934 | 0.1666 |
| 0.2433  | 0.124  | 0.1164 | 0.1159 | 0.1087 | 0.1121 | 0.108  | 0.0897 | 0.0756 |
| 0.0087  | 0.0518 | 0.0856 | 0.103  | 0.0939 | 0.0942 | 0.1037 | 0.0866 | 0.0885 |
| -0.0044 | 0.0455 | 0.0577 | 0.0894 | 0.0609 | 0.0856 | 0.1047 | 0.0946 | 0.1006 |
| 0.3996  | 0.2267 | 0.2325 | 0.2451 | 0.2382 | 0.2592 | 0.2568 | 0.2195 | 0.1985 |
| 0.1604  | 0.1294 | 0.1671 | 0.1722 | 0.1575 | 0.1623 | 0.1706 | 0.138  | 0.1318 |
| 0.0087  | 0.0516 | 0.071  | 0.1019 | 0.081  | 0.0942 | 0.118  | 0.1109 | 0.1057 |
| 0.1024  | 0.1385 | 0.2144 | 0.2232 | 0.2069 | 0.2096 | 0.2101 | 0.1725 | 0.1597 |
| 0.1465  | 0.1433 | 0.2285 | 0.2293 | 0.2099 | 0.2217 | 0.2165 | 0.177  | 0.1646 |
| 0.0528  | 0.1117 | 0.1928 | 0.2057 | 0.188  | 0.1808 | 0.1859 | 0.1539 | 0.1428 |
| 0.03    | 0.0856 | 0.1614 | 0.1564 | 0.1471 | 0.1418 | 0.1467 | 0.109  | 0.1062 |
| 0.0227  | 0.0836 | 0.1845 | 0.2009 | 0.1693 | 0.162  | 0.1544 | 0.1089 | 0.0948 |
| 0.1125  | 0.1536 | 0.2465 | 0.2383 | 0.2182 | 0.2101 | 0.2212 | 0.1772 | 0.1573 |
| 0.1178  | 0.1654 | 0.2595 | 0.2558 | 0.2344 | 0.2266 | 0.2198 | 0.184  | 0.1749 |
| 0.1351  | 0.1371 | 0.2061 | 0.2132 | 0.1953 | 0.1955 | 0.202  | 0.1746 | 0.1626 |
| 0.2011  | 0.1654 | 0.2402 | 0.2386 | 0.219  | 0.2158 | 0.2208 | 0.1821 | 0.1677 |
| 0.1563  | 0.1511 | 0.2248 | 0.224  | 0.21   | 0.2134 | 0.2164 | 0.1757 | 0.1637 |
| 0.0929  | 0.1233 | 0.2408 | 0.2408 | 0.2151 | 0.2066 | 0.2145 | 0.1592 | 0.1529 |

|         |        |        |        |        |        |        |        |        |
|---------|--------|--------|--------|--------|--------|--------|--------|--------|
| 0.3202  | 0.2151 | 0.2601 | 0.2467 | 0.2292 | 0.236  | 0.2349 | 0.1871 | 0.1714 |
| 0.7454  | 0.4016 | 0.3893 | 0.3231 | 0.2954 | 0.3051 | 0.2784 | 0.2322 | 0.2234 |
| 0.2449  | 0.1791 | 0.2382 | 0.2271 | 0.209  | 0.1998 | 0.2015 | 0.1549 | 0.1421 |
| 0.101   | 0.1157 | 0.1887 | 0.1922 | 0.1815 | 0.1838 | 0.1825 | 0.137  | 0.1294 |
| 0.0173  | 0.0954 | 0.1806 | 0.1852 | 0.164  | 0.168  | 0.1678 | 0.1332 | 0.1304 |
| 0.0529  | 0.0717 | 0.1064 | 0.1276 | 0.1239 | 0.1432 | 0.1622 | 0.1343 | 0.1482 |
| 0.0609  | 0.0769 | 0.0969 | 0.1384 | 0.1238 | 0.1498 | 0.159  | 0.1244 | 0.1217 |
| 0.0111  | 0.0839 | 0.1414 | 0.1832 | 0.1568 | 0.1778 | 0.1918 | 0.1733 | 0.1721 |
| 0.0138  | 0.0575 | 0.0755 | 0.111  | 0.0913 | 0.1239 | 0.1475 | 0.12   | 0.1403 |
| 0.0353  | 0.0469 | 0.0688 | 0.0966 | 0.1031 | 0.1253 | 0.1454 | 0.1299 | 0.1503 |
| -0.0027 | 0.0417 | 0.0712 | 0.0849 | 0.0791 | 0.0855 | 0.0933 | 0.0753 | 0.0725 |
| -0.0083 | 0.0008 | 0.006  | 0.0138 | 0.0126 | 0.0162 | 0.0207 | 0.018  | 0.0201 |
| 0.263   | 0.1165 | 0.107  | 0.1054 | 0.0908 | 0.1009 | 0.0942 | 0.0835 | 0.06   |
| 0.2565  | 0.0964 | 0.0702 | 0.0584 | 0.0663 | 0.0786 | 0.0815 | 0.0774 | 0.0661 |
| 0.1787  | 0.0927 | 0.0866 | 0.0921 | 0.0895 | 0.0986 | 0.0964 | 0.0838 | 0.0863 |
| 0.2379  | 0.1295 | 0.1329 | 0.1373 | 0.1266 | 0.1327 | 0.1347 | 0.1117 | 0.1043 |
| 0.1174  | 0.0597 | 0.0583 | 0.0534 | 0.0555 | 0.0591 | 0.0637 | 0.0491 | 0.0489 |
| 0.0085  | 0.0157 | 0.0253 | 0.0243 | 0.0226 | 0.0208 | 0.0215 | 0.0162 | 0.0154 |
| 0       | 0      | 0      | 0      | 0      | 0      | 0      | 0      | 0      |
| 0       | 0      | 0      | 0      | 0      | 0      | 0      | 0      | 0      |
| 0       | 0      | 0      | 0      | 0      | 0      | 0      | 0      | 0      |
| -0.0002 | 0.0006 | 0.0008 | 0.0017 | 0.0014 | 0.0024 | 0.0027 | 0.0025 | 0.003  |
| -0.0004 | 0.0015 | 0.0013 | 0.0028 | 0.0028 | 0.0035 | 0.0042 | 0.0039 | 0.0043 |
| 0       | 0      | 0      | 0      | 0      | 0      | 0      | 0      | 0      |
| 0       | 0      | 0      | 0      | 0      | 0      | 0      | 0      | 0      |
| 0.0002  | 0.0006 | 0.0012 | 0.0011 | 0.0009 | 0.0009 | 0.0009 | 0.0006 | 0.0006 |
| 0.0006  | 0.0014 | 0.0025 | 0.0025 | 0.0022 | 0.002  | 0.002  | 0.0015 | 0.0014 |
| 0.0007  | 0.0019 | 0.0039 | 0.0038 | 0.0036 | 0.0035 | 0.0035 | 0.0028 | 0.0026 |
| 0.1616  | 0.0785 | 0.0558 | 0.0447 | 0.0556 | 0.0555 | 0.0577 | 0.0556 | 0.0469 |
| 0.0003  | 0.0015 | 0.0031 | 0.0032 | 0.0029 | 0.0028 | 0.0029 | 0.0022 | 0.002  |
| 0.055   | 0.0259 | 0.0214 | 0.0229 | 0.0233 | 0.0258 | 0.0277 | 0.022  | 0.0204 |
| 0       | 0      | 0      | 0      | 0      | 0      | 0      | 0      | 0      |
| 0.9721  | 0.3825 | 0.3231 | 0.3581 | 0.3496 | 0.3339 | 0.3552 | 0.2676 | 0.2186 |
| 0.5676  | 0.2341 | 0.1717 | 0.1324 | 0.1437 | 0.1631 | 0.158  | 0.1373 | 0.1334 |
| 0.403   | 0.2087 | 0.2027 | 0.1952 | 0.1929 | 0.205  | 0.2142 | 0.178  | 0.1725 |
| 0.029   | 0.075  | 0.1095 | 0.1303 | 0.1139 | 0.1501 | 0.1832 | 0.1602 | 0.1592 |
| 0.046   | 0.0978 | 0.1265 | 0.1565 | 0.1402 | 0.1605 | 0.1826 | 0.1535 | 0.1437 |
| 0.0284  | 0.0965 | 0.1684 | 0.179  | 0.1625 | 0.1672 | 0.1721 | 0.14   | 0.1469 |
| -0.021  | 0.0336 | 0.0617 | 0.0912 | 0.075  | 0.0978 | 0.1114 | 0.0951 | 0.094  |
| 0.0197  | 0.0476 | 0.0854 | 0.1083 | 0.1041 | 0.1079 | 0.1239 | 0.1052 | 0.1171 |
| 0.0739  | 0.0955 | 0.1268 | 0.1428 | 0.1351 | 0.1469 | 0.1619 | 0.1375 | 0.1325 |
| 0.0026  | 0.0594 | 0.1043 | 0.1335 | 0.1096 | 0.1327 | 0.1417 | 0.1202 | 0.1169 |
| 0.0509  | 0.0956 | 0.1493 | 0.1599 | 0.1436 | 0.138  | 0.1484 | 0.1136 | 0.114  |
| 0.0693  | 0.1258 | 0.221  | 0.2279 | 0.1904 | 0.1933 | 0.1952 | 0.151  | 0.1357 |

|         |        |        |        |        |        |        |        |        |
|---------|--------|--------|--------|--------|--------|--------|--------|--------|
| 0.0548  | 0.1422 | 0.2593 | 0.2477 | 0.2174 | 0.2092 | 0.1909 | 0.1396 | 0.1262 |
| 0.1874  | 0.1739 | 0.2579 | 0.2487 | 0.2274 | 0.2197 | 0.2218 | 0.1845 | 0.171  |
| 0.642   | 0.3166 | 0.3013 | 0.2757 | 0.2551 | 0.2976 | 0.2601 | 0.2477 | 0.2308 |
| 0.5767  | 0.3021 | 0.331  | 0.289  | 0.2627 | 0.2785 | 0.2706 | 0.2036 | 0.1976 |
| 0.0364  | 0.0888 | 0.183  | 0.1809 | 0.151  | 0.1448 | 0.1604 | 0.1185 | 0.1215 |
| 0.0658  | 0.1247 | 0.2304 | 0.2235 | 0.1963 | 0.191  | 0.205  | 0.1573 | 0.1489 |
| 0.1524  | 0.1475 | 0.2122 | 0.2196 | 0.2072 | 0.208  | 0.2116 | 0.167  | 0.1507 |
| 0.1221  | 0.1353 | 0.2029 | 0.2026 | 0.1853 | 0.189  | 0.1963 | 0.1569 | 0.1438 |
| 0.0758  | 0.0987 | 0.145  | 0.1595 | 0.1474 | 0.1562 | 0.1712 | 0.1397 | 0.1377 |
| 0.1145  | 0.1139 | 0.1609 | 0.1774 | 0.1577 | 0.1664 | 0.18   | 0.1543 | 0.1497 |
| 0.0264  | 0.0905 | 0.1652 | 0.1863 | 0.1593 | 0.1597 | 0.1594 | 0.1307 | 0.1281 |
| 0.0639  | 0.0827 | 0.0963 | 0.1259 | 0.1105 | 0.139  | 0.1543 | 0.1342 | 0.1363 |
| 0.1269  | 0.0886 | 0.0978 | 0.1192 | 0.1134 | 0.1298 | 0.1386 | 0.1223 | 0.1219 |
| 0.0398  | 0.096  | 0.1618 | 0.1783 | 0.1707 | 0.1762 | 0.1841 | 0.1558 | 0.1555 |
| 0.0121  | 0.0695 | 0.1356 | 0.1718 | 0.156  | 0.1797 | 0.2045 | 0.1849 | 0.1774 |
| 0.0236  | 0.0721 | 0.0742 | 0.1152 | 0.1193 | 0.1617 | 0.1863 | 0.1615 | 0.1556 |
| 0.2397  | 0.1493 | 0.153  | 0.1739 | 0.1549 | 0.1808 | 0.1923 | 0.165  | 0.1658 |
| 0.0536  | 0.035  | 0.0319 | 0.0432 | 0.0391 | 0.0519 | 0.0675 | 0.0627 | 0.0633 |
| 0.1786  | 0.1026 | 0.1092 | 0.1111 | 0.1077 | 0.1176 | 0.124  | 0.1007 | 0.0941 |
| 0.2226  | 0.1297 | 0.1178 | 0.1275 | 0.1237 | 0.1373 | 0.1463 | 0.1204 | 0.1102 |
| 0.2104  | 0.1028 | 0.0933 | 0.1103 | 0.1101 | 0.1199 | 0.132  | 0.1163 | 0.1161 |
| 0.4066  | 0.1911 | 0.172  | 0.1473 | 0.1422 | 0.1584 | 0.1484 | 0.1279 | 0.1192 |
| 0.2821  | 0.1256 | 0.0947 | 0.065  | 0.073  | 0.0788 | 0.0698 | 0.0535 | 0.0476 |
| 0       | 0      | 0      | 0      | 0      | 0      | 0      | 0      | 0      |
| 0       | 0      | 0      | 0      | 0      | 0      | 0      | 0      | 0      |
| 0       | 0      | 0      | 0      | 0      | 0      | 0      | 0      | 0      |
| 0       | 0      | 0      | 0      | 0      | 0      | 0      | 0      | 0      |
| -0.0006 | 0.0013 | 0.002  | 0.0033 | 0.0032 | 0.0041 | 0.005  | 0.0048 | 0.0048 |
| -0.0001 | 0.0012 | 0.002  | 0.0026 | 0.0026 | 0.0028 | 0.0032 | 0.0027 | 0.003  |
| 0       | 0      | 0      | 0      | 0      | 0      | 0      | 0      | 0      |
| 0       | 0      | 0      | 0      | 0      | 0      | 0      | 0      | 0      |
| -0.0001 | 0.0003 | 0.0007 | 0.0011 | 0.0011 | 0.0016 | 0.0018 | 0.0017 | 0.0018 |
| 0.0002  | 0.0015 | 0.0014 | 0.0023 | 0.0019 | 0.0024 | 0.0027 | 0.0024 | 0.0025 |
| -0.0001 | 0.0016 | 0.002  | 0.0027 | 0.0023 | 0.0029 | 0.0038 | 0.0036 | 0.0037 |
| 0.0002  | 0.0038 | 0.0083 | 0.009  | 0.0078 | 0.0074 | 0.0075 | 0.0055 | 0.0055 |
| 0       | 0      | 0      | 0      | 0      | 0      | 0      | 0      | 0      |
| 0.0393  | 0.0144 | 0.0099 | 0.0089 | 0.0111 | 0.0104 | 0.0093 | 0.0081 | 0.008  |
| 0.0112  | 0.0266 | 0.0487 | 0.052  | 0.0464 | 0.0441 | 0.0453 | 0.0335 | 0.0341 |
| 0.3078  | 0.161  | 0.182  | 0.1629 | 0.1504 | 0.167  | 0.1779 | 0.1423 | 0.1239 |
| 0.7844  | 0.3304 | 0.2715 | 0.2371 | 0.1991 | 0.2159 | 0.2142 | 0.1529 | 0.1152 |
| 0.7857  | 0.3576 | 0.2689 | 0.2446 | 0.2392 | 0.2874 | 0.3164 | 0.2701 | 0.2851 |
| 0.0826  | 0.1056 | 0.1121 | 0.1618 | 0.1591 | 0.191  | 0.2298 | 0.1947 | 0.1977 |
| 0.0066  | 0.0757 | 0.116  | 0.1563 | 0.1426 | 0.1748 | 0.1869 | 0.1657 | 0.1664 |
| 0.0397  | 0.1031 | 0.1618 | 0.1791 | 0.1583 | 0.1606 | 0.1658 | 0.1399 | 0.1312 |



|         |        |        |        |        |        |        |        |        |
|---------|--------|--------|--------|--------|--------|--------|--------|--------|
| 0.0248  | 0.0689 | 0.1123 | 0.1342 | 0.1211 | 0.1357 | 0.1488 | 0.1178 | 0.1175 |
| 0.0217  | 0.0608 | 0.0937 | 0.1255 | 0.1197 | 0.1459 | 0.159  | 0.1326 | 0.1316 |
| -0.0008 | 0.0414 | 0.0531 | 0.0924 | 0.0762 | 0.1076 | 0.1377 | 0.1261 | 0.1232 |
| 0.0102  | 0.0679 | 0.0869 | 0.111  | 0.1008 | 0.1207 | 0.1357 | 0.1198 | 0.1165 |
| 0.0218  | 0.0715 | 0.1391 | 0.146  | 0.1345 | 0.1417 | 0.144  | 0.1158 | 0.1204 |
| 0.0787  | 0.1232 | 0.2294 | 0.2385 | 0.222  | 0.2237 | 0.2257 | 0.1709 | 0.1555 |
| 0.1885  | 0.1775 | 0.281  | 0.2741 | 0.2581 | 0.2633 | 0.266  | 0.2095 | 0.1876 |
| 0.0984  | 0.1129 | 0.2123 | 0.2081 | 0.1993 | 0.1903 | 0.2014 | 0.1486 | 0.1445 |
| 0.5195  | 0.2291 | 0.2405 | 0.2364 | 0.2202 | 0.2374 | 0.2505 | 0.2094 | 0.2015 |
| 0.858   | 0.4182 | 0.3833 | 0.3417 | 0.3277 | 0.3384 | 0.355  | 0.3039 | 0.2765 |
| 0.3976  | 0.2449 | 0.2993 | 0.2732 | 0.2718 | 0.2806 | 0.2781 | 0.2497 | 0.2335 |
| 0.0437  | 0.1029 | 0.1877 | 0.192  | 0.1822 | 0.1835 | 0.1897 | 0.1503 | 0.1314 |
| 0.0604  | 0.0976 | 0.1649 | 0.1708 | 0.1531 | 0.1517 | 0.1525 | 0.1285 | 0.1265 |
| 0.1376  | 0.1228 | 0.2021 | 0.2062 | 0.1899 | 0.1955 | 0.192  | 0.1413 | 0.1297 |
| 0.1015  | 0.1267 | 0.2207 | 0.2255 | 0.2044 | 0.1893 | 0.1941 | 0.1443 | 0.1408 |
| 0.0115  | 0.0689 | 0.1325 | 0.1439 | 0.1276 | 0.1307 | 0.1395 | 0.1016 | 0.102  |
| 0.1797  | 0.1386 | 0.1708 | 0.182  | 0.1672 | 0.1732 | 0.1799 | 0.1518 | 0.1453 |
| -0.0026 | 0.0562 | 0.1342 | 0.1694 | 0.1527 | 0.157  | 0.1784 | 0.1373 | 0.1321 |
| 0.0094  | 0.0614 | 0.1059 | 0.1407 | 0.1231 | 0.1335 | 0.1472 | 0.1264 | 0.1243 |
| 0.1812  | 0.1237 | 0.1645 | 0.1689 | 0.1563 | 0.158  | 0.1534 | 0.1232 | 0.1176 |
| 0.0152  | 0.0972 | 0.1867 | 0.2125 | 0.1771 | 0.1972 | 0.2115 | 0.1735 | 0.1599 |
| 0.0308  | 0.0775 | 0.1024 | 0.1264 | 0.1107 | 0.1457 | 0.1739 | 0.1612 | 0.17   |
| 0.0867  | 0.0781 | 0.0913 | 0.1081 | 0.0988 | 0.1135 | 0.1182 | 0.0934 | 0.0938 |
| 0.048   | 0.0388 | 0.05   | 0.0537 | 0.0488 | 0.0518 | 0.0529 | 0.0436 | 0.0419 |
| 0.1621  | 0.1023 | 0.1197 | 0.1147 | 0.1072 | 0.1149 | 0.1162 | 0.0974 | 0.0888 |
| 0.2311  | 0.1373 | 0.1337 | 0.1428 | 0.1377 | 0.152  | 0.1576 | 0.1376 | 0.1329 |
| 0.3136  | 0.1517 | 0.1257 | 0.1313 | 0.1317 | 0.1504 | 0.1559 | 0.1338 | 0.125  |
| 0.2199  | 0.099  | 0.0903 | 0.076  | 0.0759 | 0.09   | 0.0783 | 0.0722 | 0.0755 |
| 0       | 0      | 0      | 0      | 0      | 0      | 0      | 0      | 0      |
| 0.0396  | 0.0222 | 0.0239 | 0.0223 | 0.0199 | 0.0205 | 0.0215 | 0.0172 | 0.0148 |
| 0       | 0      | 0      | 0      | 0      | 0      | 0      | 0      | 0      |
| 0       | 0      | 0      | 0      | 0      | 0      | 0      | 0      | 0      |
| 0       | 0      | 0      | 0      | 0      | 0      | 0      | 0      | 0      |
| -0.0013 | 0.0003 | 0.0009 | 0.002  | 0.0018 | 0.0025 | 0.0028 | 0.0026 | 0.0024 |
| 0.0005  | 0.0011 | 0.0022 | 0.0021 | 0.002  | 0.0018 | 0.0019 | 0.0014 | 0.0014 |
| 0.0005  | 0.0012 | 0.0023 | 0.0024 | 0.0022 | 0.0021 | 0.002  | 0.0017 | 0.0016 |
| 0       | 0      | 0      | 0      | 0      | 0      | 0      | 0      | 0      |
| 0.0001  | 0.0015 | 0.0017 | 0.0026 | 0.0024 | 0.0029 | 0.0037 | 0.0035 | 0.0037 |
| -0.0002 | 0.0003 | 0.0006 | 0.001  | 0.001  | 0.0015 | 0.0016 | 0.0014 | 0.0014 |
| -0.0001 | 0.0002 | 0.0003 | 0.0006 | 0.0006 | 0.0008 | 0.001  | 0.0009 | 0.0009 |
| 0       | 0.0003 | 0.0004 | 0.0006 | 0.0005 | 0.0008 | 0.0009 | 0.0009 | 0.001  |
| -0.0002 | 0.0009 | 0.0017 | 0.0025 | 0.0023 | 0.0029 | 0.0032 | 0.0029 | 0.0029 |
| 0.0018  | 0.0064 | 0.0133 | 0.014  | 0.0119 | 0.0121 | 0.0125 | 0.0103 | 0.0107 |
| 0.1664  | 0.0607 | 0.0417 | 0.0481 | 0.0506 | 0.0608 | 0.0609 | 0.0553 | 0.0586 |





|         |        |        |        |        |        |        |        |        |
|---------|--------|--------|--------|--------|--------|--------|--------|--------|
| 0       | 0      | 0      | 0      | 0      | 0      | 0      | 0      | 0      |
| 0.0003  | 0.0008 | 0.0013 | 0.0012 | 0.0011 | 0.001  | 0.001  | 0.0008 | 0.0008 |
| 0.0005  | 0.0012 | 0.0024 | 0.0024 | 0.0021 | 0.0021 | 0.0022 | 0.0016 | 0.0014 |
| -0.0003 | 0.0013 | 0.0015 | 0.0026 | 0.0024 | 0.0028 | 0.0034 | 0.0029 | 0.0034 |
| 0.0006  | 0.0013 | 0.0017 | 0.003  | 0.0028 | 0.0037 | 0.0046 | 0.004  | 0.0038 |
| 0.0003  | 0.0006 | 0.0012 | 0.0012 | 0.0011 | 0.001  | 0.0011 | 0.0009 | 0.0008 |
| 0.0013  | 0.0052 | 0.0108 | 0.0118 | 0.0113 | 0.0122 | 0.0133 | 0.0109 | 0.0101 |
| -0.0007 | 0.0147 | 0.0276 | 0.0361 | 0.0326 | 0.0338 | 0.0415 | 0.0332 | 0.0344 |
| 0.0359  | 0.0173 | 0.0155 | 0.0159 | 0.016  | 0.0176 | 0.0172 | 0.0165 | 0.0144 |
| 0.0005  | 0.0008 | 0.0013 | 0.0014 | 0.0012 | 0.0011 | 0.0012 | 0.0009 | 0.0008 |
| -0.0001 | 0.0013 | 0.0014 | 0.0024 | 0.0018 | 0.0024 | 0.003  | 0.0026 | 0.0028 |
| 0.0032  | 0.0142 | 0.0178 | 0.0232 | 0.0195 | 0.0232 | 0.027  | 0.0246 | 0.025  |
| 0.2399  | 0.1429 | 0.1491 | 0.16   | 0.152  | 0.1716 | 0.1751 | 0.147  | 0.1388 |
| -0.0006 | 0.0488 | 0.0775 | 0.1018 | 0.105  | 0.1086 | 0.1201 | 0.1003 | 0.0964 |
| 0.0421  | 0.0538 | 0.0742 | 0.1021 | 0.0971 | 0.1349 | 0.1445 | 0.122  | 0.1307 |
| 0.1995  | 0.1465 | 0.123  | 0.1607 | 0.153  | 0.1855 | 0.2277 | 0.1939 | 0.2092 |
| 0.0581  | 0.0863 | 0.0947 | 0.1352 | 0.1262 | 0.1496 | 0.1564 | 0.1496 | 0.1529 |
| 0.0239  | 0.0752 | 0.1135 | 0.1519 | 0.1356 | 0.1402 | 0.1643 | 0.139  | 0.1379 |
| 0.0042  | 0.0745 | 0.1138 | 0.186  | 0.1726 | 0.1815 | 0.1956 | 0.1769 | 0.1829 |
| 0.0044  | 0.0538 | 0.0716 | 0.1128 | 0.1148 | 0.1226 | 0.1487 | 0.1224 | 0.1435 |
| -0.0018 | 0.046  | 0.0738 | 0.0968 | 0.0901 | 0.1111 | 0.1204 | 0.1053 | 0.1156 |
| 0.0032  | 0.0586 | 0.0787 | 0.1121 | 0.1028 | 0.142  | 0.1591 | 0.1379 | 0.1452 |
| 0.0352  | 0.0989 | 0.1527 | 0.1667 | 0.1577 | 0.1685 | 0.1811 | 0.1484 | 0.1531 |
| 0.0509  | 0.104  | 0.1784 | 0.1814 | 0.1631 | 0.1668 | 0.1612 | 0.1274 | 0.1283 |
| 0.0419  | 0.0972 | 0.1501 | 0.164  | 0.1438 | 0.1578 | 0.1643 | 0.1238 | 0.1282 |
| 0.0487  | 0.0907 | 0.1375 | 0.1479 | 0.1344 | 0.1319 | 0.1475 | 0.1309 | 0.1263 |
| 0.0116  | 0.0739 | 0.1333 | 0.1633 | 0.1523 | 0.1613 | 0.1768 | 0.1496 | 0.1464 |
| 0.0355  | 0.0816 | 0.1292 | 0.1434 | 0.1304 | 0.137  | 0.1557 | 0.1316 | 0.1241 |
| 0.2084  | 0.1749 | 0.2397 | 0.2468 | 0.2249 | 0.2224 | 0.2256 | 0.1818 | 0.1705 |
| 0.1252  | 0.115  | 0.1677 | 0.1756 | 0.1661 | 0.171  | 0.1769 | 0.1427 | 0.1328 |
| 0.0433  | 0.0995 | 0.1739 | 0.1677 | 0.152  | 0.1503 | 0.1539 | 0.1235 | 0.1266 |
| 0.0918  | 0.1291 | 0.2278 | 0.2335 | 0.2089 | 0.2124 | 0.2144 | 0.1656 | 0.1525 |
| 0.0001  | 0.0583 | 0.1198 | 0.1403 | 0.1306 | 0.1365 | 0.1534 | 0.1276 | 0.1337 |
| 0.111   | 0.1079 | 0.1484 | 0.1655 | 0.1457 | 0.1611 | 0.1748 | 0.1484 | 0.1452 |
| -0.0048 | 0.0513 | 0.0957 | 0.1131 | 0.0893 | 0.106  | 0.1336 | 0.1193 | 0.1218 |
| 0.2584  | 0.1395 | 0.1348 | 0.149  | 0.1434 | 0.168  | 0.1851 | 0.1483 | 0.1515 |
| 0.7448  | 0.3594 | 0.3295 | 0.2595 | 0.2211 | 0.2545 | 0.214  | 0.1783 | 0.1622 |
| 0.4309  | 0.2657 | 0.3196 | 0.3053 | 0.2751 | 0.2747 | 0.2495 | 0.2333 | 0.2148 |
| 0.0583  | 0.1585 | 0.2548 | 0.2682 | 0.2338 | 0.2273 | 0.2349 | 0.1786 | 0.1722 |
| 0.0191  | 0.0918 | 0.1842 | 0.1977 | 0.177  | 0.1763 | 0.1813 | 0.1333 | 0.1271 |
| -0.0083 | 0.0571 | 0.1128 | 0.1349 | 0.1169 | 0.1249 | 0.1339 | 0.1027 | 0.1127 |
| 0.0247  | 0.0807 | 0.1137 | 0.1283 | 0.1144 | 0.1256 | 0.1449 | 0.1177 | 0.1228 |
| 0.4988  | 0.2459 | 0.2185 | 0.2142 | 0.1919 | 0.2341 | 0.2513 | 0.2049 | 0.1998 |
| 0.6791  | 0.326  | 0.2557 | 0.2467 | 0.2428 | 0.2698 | 0.2691 | 0.2363 | 0.2554 |

|         |         |        |        |        |        |        |        |        |
|---------|---------|--------|--------|--------|--------|--------|--------|--------|
| 0.3576  | 0.1572  | 0.1369 | 0.1306 | 0.1336 | 0.1542 | 0.1472 | 0.123  | 0.1104 |
| 0.3679  | 0.1504  | 0.1095 | 0.0972 | 0.0933 | 0.0966 | 0.1088 | 0.1021 | 0.0796 |
| 0.2618  | 0.1211  | 0.0992 | 0.0838 | 0.0887 | 0.11   | 0.1027 | 0.0951 | 0.0833 |
| 0.0003  | 0.0064  | 0.0064 | 0.0096 | 0.0078 | 0.0094 | 0.0133 | 0.0125 | 0.0127 |
| 0       | 0       | 0      | 0      | 0      | 0      | 0      | 0      | 0      |
| 0       | 0       | 0      | 0      | 0      | 0      | 0      | 0      | 0      |
| 0.0008  | 0.0017  | 0.0021 | 0.0029 | 0.0024 | 0.003  | 0.0034 | 0.0032 | 0.0036 |
| 0.0003  | 0.0006  | 0.0012 | 0.0012 | 0.0011 | 0.0011 | 0.0011 | 0.0009 | 0.0008 |
| 0       | 0       | 0      | 0      | 0      | 0      | 0      | 0      | 0      |
| 0.0003  | 0.0011  | 0.0012 | 0.0018 | 0.0016 | 0.0019 | 0.0022 | 0.002  | 0.0021 |
| 0       | 0       | 0      | 0      | 0      | 0      | 0      | 0      | 0      |
| 0.0013  | 0.0032  | 0.0063 | 0.0065 | 0.0062 | 0.0061 | 0.0063 | 0.005  | 0.0047 |
| 0.0041  | 0.0167  | 0.0277 | 0.0328 | 0.0307 | 0.0327 | 0.0346 | 0.0295 | 0.0306 |
| 0.02    | 0.0488  | 0.0651 | 0.0778 | 0.0742 | 0.0745 | 0.0837 | 0.0665 | 0.0724 |
| 0.0408  | 0.0211  | 0.018  | 0.0189 | 0.0177 | 0.0189 | 0.0194 | 0.0186 | 0.0161 |
| 0.0358  | 0.0137  | 0.0113 | 0.0097 | 0.0108 | 0.0116 | 0.0129 | 0.0128 | 0.0131 |
| 0.1313  | 0.0757  | 0.078  | 0.0858 | 0.0818 | 0.0957 | 0.1028 | 0.0891 | 0.0898 |
| -0.0055 | 0.0307  | 0.0464 | 0.0728 | 0.0687 | 0.0829 | 0.0969 | 0.0828 | 0.0857 |
| 0.0197  | 0.0797  | 0.1038 | 0.1529 | 0.1372 | 0.1665 | 0.178  | 0.1466 | 0.1437 |
| 0.0006  | 0.0393  | 0.0451 | 0.102  | 0.0792 | 0.0914 | 0.1277 | 0.0982 | 0.0998 |
| 0.0912  | 0.0889  | 0.1082 | 0.1487 | 0.143  | 0.1991 | 0.2379 | 0.1891 | 0.2064 |
| -0.0732 | -0.0081 | 0.0154 | 0.0686 | 0.0608 | 0.0912 | 0.1294 | 0.1115 | 0.1226 |
| 0.0334  | 0.0668  | 0.1012 | 0.1412 | 0.1273 | 0.1523 | 0.1715 | 0.1475 | 0.1547 |
| 0.0287  | 0.0747  | 0.0924 | 0.1206 | 0.1193 | 0.136  | 0.1649 | 0.1464 | 0.155  |
| 0.0157  | 0.0713  | 0.0983 | 0.1233 | 0.1057 | 0.1259 | 0.1315 | 0.1145 | 0.1265 |
| 0.0134  | 0.0623  | 0.0575 | 0.105  | 0.0886 | 0.127  | 0.163  | 0.1397 | 0.1677 |
| 0.0631  | 0.1155  | 0.1265 | 0.1554 | 0.1482 | 0.1618 | 0.187  | 0.1513 | 0.1572 |
| 0.0286  | 0.0786  | 0.1205 | 0.1346 | 0.1157 | 0.1263 | 0.1512 | 0.1321 | 0.125  |
| 0.0646  | 0.1227  | 0.2163 | 0.2254 | 0.2088 | 0.21   | 0.2122 | 0.1711 | 0.1688 |
| 0.144   | 0.1651  | 0.2652 | 0.2592 | 0.2565 | 0.2481 | 0.2424 | 0.1941 | 0.1732 |
| 0.1746  | 0.1645  | 0.2582 | 0.2505 | 0.2301 | 0.2218 | 0.2241 | 0.1756 | 0.168  |
| 0.0407  | 0.1006  | 0.2095 | 0.221  | 0.19   | 0.1911 | 0.1992 | 0.1551 | 0.1428 |
| 0.0551  | 0.1161  | 0.2252 | 0.2311 | 0.2    | 0.2004 | 0.2138 | 0.1677 | 0.1491 |
| 0.0793  | 0.1059  | 0.2061 | 0.2061 | 0.1881 | 0.1892 | 0.1841 | 0.143  | 0.1343 |
| 0.0171  | 0.0786  | 0.1518 | 0.152  | 0.1365 | 0.1348 | 0.1478 | 0.103  | 0.0953 |
| 0.0273  | 0.089   | 0.1545 | 0.1659 | 0.1484 | 0.1538 | 0.1589 | 0.1321 | 0.1356 |
| 0.0752  | 0.1327  | 0.2322 | 0.2392 | 0.2122 | 0.2155 | 0.2125 | 0.1582 | 0.1446 |
| 0.0206  | 0.078   | 0.1485 | 0.1511 | 0.1499 | 0.1499 | 0.1475 | 0.1116 | 0.107  |
| 0.0207  | 0.0813  | 0.137  | 0.1487 | 0.1317 | 0.1394 | 0.1502 | 0.1267 | 0.132  |
| 0.1872  | 0.1327  | 0.143  | 0.1691 | 0.1643 | 0.1837 | 0.1992 | 0.17   | 0.1694 |
| 0.1093  | 0.0944  | 0.1134 | 0.1464 | 0.1327 | 0.155  | 0.173  | 0.141  | 0.1385 |
| 0.0512  | 0.0536  | 0.0724 | 0.0798 | 0.0735 | 0.0794 | 0.0851 | 0.0687 | 0.072  |
| 0.7913  | 0.3719  | 0.2947 | 0.2676 | 0.2876 | 0.311  | 0.3314 | 0.2997 | 0.2657 |
| 0.8969  | 0.4653  | 0.4277 | 0.4012 | 0.4183 | 0.4344 | 0.4511 | 0.4071 | 0.3668 |

|         |        |        |        |        |        |        |        |        |
|---------|--------|--------|--------|--------|--------|--------|--------|--------|
| 0.1256  | 0.1372 | 0.2296 | 0.2199 | 0.197  | 0.1953 | 0.1967 | 0.1479 | 0.1333 |
| 0.2595  | 0.1983 | 0.2658 | 0.2491 | 0.2294 | 0.2406 | 0.2473 | 0.2009 | 0.187  |
| 0.1405  | 0.139  | 0.1945 | 0.2039 | 0.1848 | 0.1879 | 0.1941 | 0.156  | 0.1531 |
| 0.004   | 0.0877 | 0.1285 | 0.1635 | 0.1563 | 0.1821 | 0.1933 | 0.1728 | 0.1792 |
| 0.0477  | 0.0602 | 0.0796 | 0.1063 | 0.0967 | 0.119  | 0.1335 | 0.116  | 0.1213 |
| 0.1639  | 0.104  | 0.1097 | 0.1179 | 0.1067 | 0.121  | 0.131  | 0.1133 | 0.1147 |
| 0.177   | 0.0808 | 0.0735 | 0.0755 | 0.0738 | 0.0831 | 0.0794 | 0.0652 | 0.0669 |
| 0.1408  | 0.0619 | 0.05   | 0.0463 | 0.05   | 0.0556 | 0.0597 | 0.0605 | 0.0536 |
| 0.0074  | 0.0037 | 0.0036 | 0.003  | 0.0024 | 0.0027 | 0.0024 | 0.0022 | 0.0016 |
| 0.009   | 0.0072 | 0.0104 | 0.0101 | 0.0089 | 0.0094 | 0.0092 | 0.0074 | 0.0072 |
| 0       | 0      | 0      | 0      | 0      | 0      | 0      | 0      | 0      |
| 0       | 0      | 0      | 0      | 0      | 0      | 0      | 0      | 0      |
| 0.0009  | 0.0041 | 0.0063 | 0.0082 | 0.0074 | 0.0078 | 0.0082 | 0.0067 | 0.0071 |
| 0.0002  | 0.0006 | 0.0011 | 0.0011 | 0.001  | 0.001  | 0.0009 | 0.0008 | 0.0007 |
| 0.0072  | 0.0029 | 0.0022 | 0.0023 | 0.002  | 0.0018 | 0.0013 | 0.0011 | 0.0012 |
| 0.0145  | 0.0078 | 0.0072 | 0.0086 | 0.0084 | 0.0092 | 0.0097 | 0.0085 | 0.0085 |
| 0.0156  | 0.0117 | 0.0145 | 0.0153 | 0.014  | 0.0148 | 0.0156 | 0.0131 | 0.0126 |
| 0.0545  | 0.0394 | 0.0474 | 0.0504 | 0.0477 | 0.0529 | 0.0564 | 0.0476 | 0.0448 |
| 0.0394  | 0.0348 | 0.044  | 0.0497 | 0.0447 | 0.0491 | 0.0539 | 0.0446 | 0.0449 |
| 0.0008  | 0.0076 | 0.0123 | 0.018  | 0.0152 | 0.0176 | 0.0205 | 0.0166 | 0.0168 |
| 0.0646  | 0.0426 | 0.0395 | 0.0465 | 0.0468 | 0.0547 | 0.0609 | 0.0514 | 0.0533 |
| 0.0176  | 0.0187 | 0.022  | 0.0317 | 0.0289 | 0.0367 | 0.04   | 0.0366 | 0.0394 |
| 0.142   | 0.092  | 0.1154 | 0.1141 | 0.1057 | 0.1094 | 0.1152 | 0.0928 | 0.0876 |
| 0.0248  | 0.0885 | 0.1342 | 0.1656 | 0.1465 | 0.1549 | 0.1649 | 0.1271 | 0.1322 |
| 0.1579  | 0.1241 | 0.1465 | 0.1591 | 0.1469 | 0.1651 | 0.1748 | 0.1442 | 0.1351 |
| 0.0593  | 0.0752 | 0.0945 | 0.1226 | 0.1099 | 0.139  | 0.16   | 0.1304 | 0.1403 |
| -0.0023 | 0.0586 | 0.0993 | 0.1337 | 0.1238 | 0.1334 | 0.1507 | 0.128  | 0.1287 |
| -0.0069 | 0.0535 | 0.0925 | 0.1258 | 0.1157 | 0.1408 | 0.15   | 0.1325 | 0.129  |
| -0.0051 | 0.0464 | 0.1113 | 0.1368 | 0.1317 | 0.1363 | 0.1466 | 0.1366 | 0.1287 |
| 0.1937  | 0.1588 | 0.2372 | 0.2387 | 0.2202 | 0.2063 | 0.2092 | 0.1615 | 0.1497 |
| 0.1054  | 0.136  | 0.221  | 0.2134 | 0.1992 | 0.1996 | 0.1912 | 0.1507 | 0.1404 |
| 0.0449  | 0.0763 | 0.1159 | 0.1395 | 0.1353 | 0.1423 | 0.1511 | 0.1215 | 0.1172 |
| 0.0481  | 0.0705 | 0.0988 | 0.1281 | 0.132  | 0.1402 | 0.1555 | 0.1348 | 0.1313 |
| -0.0009 | 0.0795 | 0.1423 | 0.1677 | 0.1462 | 0.1493 | 0.163  | 0.1355 | 0.134  |
| 0.0841  | 0.1169 | 0.2147 | 0.2137 | 0.1902 | 0.1853 | 0.1903 | 0.1535 | 0.1518 |
| 0.1547  | 0.1422 | 0.2178 | 0.209  | 0.1932 | 0.1928 | 0.1894 | 0.1456 | 0.1238 |
| 0.2624  | 0.2042 | 0.2785 | 0.2779 | 0.2605 | 0.259  | 0.2443 | 0.1867 | 0.1744 |
| 0.0205  | 0.1023 | 0.211  | 0.2152 | 0.1934 | 0.1879 | 0.1902 | 0.1437 | 0.1219 |
| 0.1557  | 0.1818 | 0.2743 | 0.2673 | 0.2424 | 0.2301 | 0.2275 | 0.1806 | 0.1771 |
| 0.1838  | 0.1404 | 0.2008 | 0.1997 | 0.1871 | 0.193  | 0.1916 | 0.1524 | 0.1435 |
| 0.7326  | 0.4099 | 0.3843 | 0.3604 | 0.3824 | 0.3481 | 0.3263 | 0.2699 | 0.2352 |
| 0.1441  | 0.1613 | 0.2402 | 0.2549 | 0.2361 | 0.2313 | 0.2291 | 0.1919 | 0.1823 |
| 0.0194  | 0.0801 | 0.1389 | 0.1556 | 0.1371 | 0.1459 | 0.1561 | 0.1144 | 0.1169 |
| 0.0994  | 0.0968 | 0.1286 | 0.1497 | 0.1378 | 0.159  | 0.1693 | 0.1427 | 0.1501 |

|         |        |        |        |        |        |        |        |        |
|---------|--------|--------|--------|--------|--------|--------|--------|--------|
| 0.0649  | 0.1171 | 0.1899 | 0.1974 | 0.1757 | 0.1688 | 0.1712 | 0.1324 | 0.1242 |
| 0.0326  | 0.0838 | 0.1503 | 0.1737 | 0.1601 | 0.1694 | 0.1866 | 0.1519 | 0.1472 |
| 0.1599  | 0.1265 | 0.1645 | 0.1803 | 0.1688 | 0.1826 | 0.1938 | 0.1573 | 0.1444 |
| 0.1318  | 0.1054 | 0.1427 | 0.1414 | 0.1327 | 0.1352 | 0.1322 | 0.1066 | 0.1039 |
| 0.2808  | 0.1822 | 0.236  | 0.233  | 0.2213 | 0.2293 | 0.2279 | 0.1806 | 0.1568 |
| 0.4961  | 0.2743 | 0.3063 | 0.2842 | 0.2976 | 0.3003 | 0.2813 | 0.2454 | 0.2446 |
| 0.1788  | 0.1324 | 0.2006 | 0.1964 | 0.1742 | 0.1823 | 0.1782 | 0.1425 | 0.1342 |
| 0.1166  | 0.1571 | 0.2586 | 0.2658 | 0.2379 | 0.2335 | 0.2365 | 0.1934 | 0.1903 |
| 0.1227  | 0.1512 | 0.238  | 0.2403 | 0.2259 | 0.2282 | 0.2292 | 0.1841 | 0.1836 |
| 0.0971  | 0.0887 | 0.1233 | 0.1384 | 0.1296 | 0.1427 | 0.1525 | 0.1276 | 0.1227 |
| 0.2127  | 0.1479 | 0.1724 | 0.2062 | 0.195  | 0.2253 | 0.2457 | 0.2067 | 0.2001 |
| -0.0258 | 0.0373 | 0.0536 | 0.0874 | 0.0644 | 0.0775 | 0.1158 | 0.095  | 0.0906 |
| 0.0079  | 0.0348 | 0.0633 | 0.0701 | 0.0674 | 0.0676 | 0.0709 | 0.0579 | 0.0514 |
| 0.4688  | 0.2136 | 0.1627 | 0.1536 | 0.1531 | 0.1734 | 0.1952 | 0.163  | 0.1442 |
| 0.1317  | 0.0566 | 0.041  | 0.0351 | 0.0398 | 0.0389 | 0.0405 | 0.0361 | 0.0288 |
| 0.0483  | 0.0218 | 0.0185 | 0.0163 | 0.0152 | 0.0182 | 0.0212 | 0.0178 | 0.0163 |
| 0       | 0      | 0      | 0      | 0      | 0      | 0      | 0      | 0      |
| 0       | 0      | 0      | 0      | 0      | 0      | 0      | 0      | 0      |
| 0.0443  | 0.0184 | 0.0099 | 0.0079 | 0.0083 | 0.0074 | 0.0076 | 0.0056 | 0.006  |
| 0.0323  | 0.015  | 0.0133 | 0.0116 | 0.0107 | 0.0109 | 0.0102 | 0.0097 | 0.0086 |
| -0.0007 | 0.0012 | 0.0015 | 0.0028 | 0.0025 | 0.0031 | 0.0041 | 0.0041 | 0.0041 |
| 0       | 0      | 0      | 0      | 0      | 0      | 0      | 0      | 0      |
| 0.001   | 0.0063 | 0.0119 | 0.0117 | 0.0103 | 0.0092 | 0.0104 | 0.0079 | 0.0076 |
| 0.1664  | 0.0894 | 0.091  | 0.0886 | 0.0862 | 0.0926 | 0.0911 | 0.0757 | 0.0735 |
| 0.199   | 0.0987 | 0.0842 | 0.0905 | 0.0915 | 0.1006 | 0.1127 | 0.0982 | 0.0947 |
| 0.0974  | 0.0449 | 0.0413 | 0.037  | 0.037  | 0.0365 | 0.0352 | 0.0341 | 0.0283 |
| 0.0041  | 0.0296 | 0.0628 | 0.0722 | 0.0649 | 0.0681 | 0.0741 | 0.0552 | 0.0543 |
| 0.0009  | 0.0286 | 0.0624 | 0.0686 | 0.0582 | 0.0608 | 0.0639 | 0.0523 | 0.0515 |
| 0.0443  | 0.0675 | 0.0975 | 0.1182 | 0.1066 | 0.1188 | 0.1305 | 0.1181 | 0.1166 |
| 0.1211  | 0.0868 | 0.0859 | 0.1062 | 0.1    | 0.1233 | 0.1385 | 0.1246 | 0.1195 |
| 0.1612  | 0.1368 | 0.1777 | 0.1908 | 0.1759 | 0.1819 | 0.1904 | 0.1584 | 0.1526 |
| 0.0298  | 0.0974 | 0.1922 | 0.21   | 0.1837 | 0.1808 | 0.1924 | 0.1521 | 0.1481 |
| 0.1327  | 0.139  | 0.2292 | 0.2237 | 0.1996 | 0.1941 | 0.1937 | 0.1532 | 0.1392 |
| 0.0743  | 0.1009 | 0.16   | 0.1753 | 0.1592 | 0.1638 | 0.1729 | 0.1445 | 0.1347 |
| 0.3633  | 0.2001 | 0.2356 | 0.2141 | 0.2022 | 0.2069 | 0.2077 | 0.1595 | 0.145  |
| 0.5058  | 0.3018 | 0.3422 | 0.3451 | 0.331  | 0.3317 | 0.3428 | 0.2868 | 0.2729 |
| 0.1554  | 0.1779 | 0.2752 | 0.2784 | 0.2455 | 0.2457 | 0.2471 | 0.1988 | 0.197  |
| 0.0338  | 0.1043 | 0.2185 | 0.2157 | 0.1932 | 0.1887 | 0.1793 | 0.1374 | 0.132  |
| 0.0575  | 0.1053 | 0.185  | 0.1907 | 0.1718 | 0.1729 | 0.1624 | 0.1313 | 0.1262 |
| 0.0064  | 0.0576 | 0.1084 | 0.1329 | 0.1219 | 0.1298 | 0.1302 | 0.1133 | 0.0991 |
| 0.033   | 0.0819 | 0.1511 | 0.1739 | 0.1571 | 0.1508 | 0.1538 | 0.1233 | 0.1253 |
| 0.1243  | 0.1469 | 0.2395 | 0.2397 | 0.2227 | 0.2194 | 0.2229 | 0.174  | 0.1738 |
| 0.0365  | 0.1124 | 0.2122 | 0.2245 | 0.2018 | 0.1985 | 0.2003 | 0.1544 | 0.1464 |
| 0.0484  | 0.1056 | 0.185  | 0.1995 | 0.1725 | 0.1786 | 0.1768 | 0.1446 | 0.1341 |

|        |        |        |        |        |        |        |        |        |
|--------|--------|--------|--------|--------|--------|--------|--------|--------|
| 0.2256 | 0.1723 | 0.234  | 0.2216 | 0.211  | 0.2122 | 0.2033 | 0.164  | 0.1508 |
| 0.0381 | 0.0772 | 0.1617 | 0.1612 | 0.1521 | 0.1493 | 0.1503 | 0.116  | 0.1036 |
| 0.1558 | 0.1362 | 0.2217 | 0.2364 | 0.2133 | 0.2161 | 0.2311 | 0.1915 | 0.1824 |
| 0.0389 | 0.1012 | 0.1812 | 0.204  | 0.1882 | 0.1798 | 0.1867 | 0.146  | 0.1483 |
| 0.1014 | 0.0879 | 0.1121 | 0.1296 | 0.1162 | 0.1294 | 0.1419 | 0.1185 | 0.1147 |
| 0.2671 | 0.1529 | 0.1664 | 0.1699 | 0.1591 | 0.1755 | 0.1808 | 0.1606 | 0.1496 |
| 0.187  | 0.1432 | 0.2179 | 0.2169 | 0.2091 | 0.203  | 0.1936 | 0.1491 | 0.1342 |
| 0.0499 | 0.1164 | 0.1972 | 0.2019 | 0.1772 | 0.175  | 0.1975 | 0.1498 | 0.1429 |
| 0.1679 | 0.1207 | 0.1406 | 0.1564 | 0.146  | 0.161  | 0.1727 | 0.1434 | 0.1421 |
| 0.1994 | 0.1302 | 0.1463 | 0.1486 | 0.1378 | 0.1459 | 0.1475 | 0.1241 | 0.1223 |
| 0.0799 | 0.1096 | 0.202  | 0.2091 | 0.1897 | 0.1921 | 0.1918 | 0.1409 | 0.1271 |
| 0.2614 | 0.1997 | 0.268  | 0.2592 | 0.2526 | 0.2518 | 0.2443 | 0.1997 | 0.184  |
| 0.2394 | 0.18   | 0.2451 | 0.2551 | 0.2379 | 0.2393 | 0.2352 | 0.1889 | 0.1905 |
| 0.0239 | 0.0667 | 0.1607 | 0.1767 | 0.1542 | 0.1575 | 0.1593 | 0.131  | 0.1184 |
| 0.0544 | 0.1184 | 0.2155 | 0.2209 | 0.2074 | 0.2022 | 0.1995 | 0.1505 | 0.1424 |
| 0.4551 | 0.2359 | 0.2495 | 0.2363 | 0.2226 | 0.2384 | 0.2413 | 0.2054 | 0.1807 |
| 0.4587 | 0.2294 | 0.234  | 0.201  | 0.1826 | 0.2195 | 0.2162 | 0.1807 | 0.1724 |
| 0.2274 | 0.1567 | 0.167  | 0.1809 | 0.1609 | 0.1856 | 0.1982 | 0.1727 | 0.1722 |
| 0.021  | 0.0718 | 0.1269 | 0.1409 | 0.1358 | 0.1379 | 0.1425 | 0.1169 | 0.1016 |
| 0.3145 | 0.1577 | 0.1496 | 0.1471 | 0.1538 | 0.1789 | 0.1684 | 0.1399 | 0.1263 |
| 0.1987 | 0.0916 | 0.0731 | 0.0674 | 0.0676 | 0.0787 | 0.078  | 0.067  | 0.0603 |
| 0.0013 | 0.0031 | 0.0058 | 0.0061 | 0.0057 | 0.0054 | 0.0052 | 0.0044 | 0.0044 |
| 0      | 0      | 0      | 0      | 0      | 0      | 0      | 0      | 0      |
| 0      | 0      | 0      | 0      | 0      | 0      | 0      | 0      | 0      |
| 0      | 0      | 0      | 0      | 0      | 0      | 0      | 0      | 0      |
| 0.0005 | 0.0019 | 0.0028 | 0.0033 | 0.0029 | 0.0034 | 0.0039 | 0.0031 | 0.0029 |
| 0.0078 | 0.0054 | 0.0059 | 0.0066 | 0.0064 | 0.0071 | 0.0075 | 0.0064 | 0.0065 |
| 0.0203 | 0.0085 | 0.0074 | 0.0051 | 0.0045 | 0.0053 | 0.0051 | 0.0045 | 0.0043 |
| 0.0086 | 0.0069 | 0.0103 | 0.01   | 0.0092 | 0.0094 | 0.0091 | 0.0073 | 0.0064 |
| 0.0251 | 0.0211 | 0.0273 | 0.0296 | 0.0269 | 0.0287 | 0.0296 | 0.0249 | 0.024  |
| 0.0459 | 0.0306 | 0.0336 | 0.038  | 0.0352 | 0.0393 | 0.0435 | 0.0368 | 0.0351 |
| 0.0084 | 0.0055 | 0.0065 | 0.0063 | 0.0058 | 0.0057 | 0.0059 | 0.0044 | 0.0044 |
| 0.0974 | 0.068  | 0.0728 | 0.0896 | 0.0799 | 0.0927 | 0.1019 | 0.0888 | 0.0899 |
| 0.0105 | 0.022  | 0.0254 | 0.0397 | 0.037  | 0.039  | 0.0406 | 0.0327 | 0.0331 |
| 0.0473 | 0.0474 | 0.0535 | 0.0698 | 0.0646 | 0.0764 | 0.0886 | 0.0801 | 0.0768 |
| 0.0825 | 0.1007 | 0.1143 | 0.1482 | 0.1369 | 0.1485 | 0.1659 | 0.1381 | 0.1363 |
| 0.2023 | 0.1781 | 0.2389 | 0.2464 | 0.2285 | 0.2381 | 0.2495 | 0.2036 | 0.1906 |
| 0.0334 | 0.0965 | 0.1728 | 0.174  | 0.1633 | 0.1537 | 0.1617 | 0.1225 | 0.1113 |
| 0.0993 | 0.1324 | 0.2073 | 0.2141 | 0.1885 | 0.1948 | 0.1931 | 0.1541 | 0.1441 |
| 0.0521 | 0.1322 | 0.2364 | 0.2479 | 0.2275 | 0.2182 | 0.2203 | 0.1663 | 0.1324 |
| 0.2505 | 0.1825 | 0.2378 | 0.2283 | 0.2135 | 0.2215 | 0.2216 | 0.1707 | 0.1579 |
| 0.322  | 0.2266 | 0.282  | 0.278  | 0.2563 | 0.2555 | 0.264  | 0.208  | 0.1953 |
| 0.0576 | 0.1084 | 0.2026 | 0.2219 | 0.1991 | 0.1952 | 0.192  | 0.142  | 0.128  |
| 0.0754 | 0.1492 | 0.2691 | 0.2712 | 0.2504 | 0.2267 | 0.2347 | 0.1774 | 0.166  |



|         |        |        |        |        |        |        |        |        |
|---------|--------|--------|--------|--------|--------|--------|--------|--------|
| 0.1501  | 0.1628 | 0.2611 | 0.2576 | 0.2274 | 0.2203 | 0.2239 | 0.1816 | 0.1763 |
| 0.0606  | 0.0851 | 0.1367 | 0.1502 | 0.1377 | 0.1513 | 0.152  | 0.1266 | 0.1235 |
| 0.0217  | 0.0763 | 0.1154 | 0.1434 | 0.1254 | 0.1344 | 0.1438 | 0.1216 | 0.128  |
| 0.043   | 0.0984 | 0.1683 | 0.1776 | 0.1591 | 0.1604 | 0.1644 | 0.1304 | 0.1306 |
| 0.1155  | 0.125  | 0.2104 | 0.2094 | 0.1908 | 0.2009 | 0.2027 | 0.1612 | 0.158  |
| 0.0138  | 0.0791 | 0.1491 | 0.1569 | 0.14   | 0.1466 | 0.157  | 0.1256 | 0.1196 |
| 0.0213  | 0.1006 | 0.2031 | 0.2113 | 0.182  | 0.1791 | 0.1908 | 0.1519 | 0.1391 |
| 0.1251  | 0.1631 | 0.2739 | 0.2868 | 0.2576 | 0.2496 | 0.247  | 0.1916 | 0.1757 |
| 0.1058  | 0.1369 | 0.2293 | 0.2167 | 0.1911 | 0.1875 | 0.1953 | 0.1443 | 0.1334 |
| -0.0038 | 0.0585 | 0.1083 | 0.1304 | 0.107  | 0.1218 | 0.1363 | 0.0985 | 0.0989 |
| 0.1671  | 0.117  | 0.125  | 0.1579 | 0.1487 | 0.1747 | 0.185  | 0.1583 | 0.1512 |
| 0.422   | 0.2408 | 0.2584 | 0.2395 | 0.2215 | 0.2262 | 0.2301 | 0.1966 | 0.1884 |
| 0.1308  | 0.136  | 0.1748 | 0.199  | 0.1834 | 0.1959 | 0.2064 | 0.1732 | 0.1771 |
| 0.2038  | 0.1423 | 0.1465 | 0.1647 | 0.1541 | 0.1755 | 0.1868 | 0.1568 | 0.1571 |
| 0.0459  | 0.07   | 0.0766 | 0.1089 | 0.0917 | 0.114  | 0.1363 | 0.1173 | 0.1176 |
| 0.0853  | 0.1077 | 0.1696 | 0.1767 | 0.1612 | 0.1686 | 0.1822 | 0.1537 | 0.1423 |
| 0.242   | 0.166  | 0.2378 | 0.2329 | 0.2061 | 0.1915 | 0.1771 | 0.1407 | 0.1327 |
| 0.1873  | 0.1582 | 0.2357 | 0.2278 | 0.2027 | 0.2008 | 0.2042 | 0.1638 | 0.1537 |
| 0.0256  | 0.0786 | 0.1884 | 0.2002 | 0.1803 | 0.1716 | 0.1714 | 0.1262 | 0.1286 |
| 0.0386  | 0.094  | 0.1607 | 0.1709 | 0.1573 | 0.1496 | 0.156  | 0.1218 | 0.125  |
| 0.0132  | 0.0718 | 0.159  | 0.1633 | 0.1504 | 0.1525 | 0.1597 | 0.1176 | 0.1099 |
| 0.1486  | 0.1527 | 0.2509 | 0.2512 | 0.227  | 0.2085 | 0.2042 | 0.1594 | 0.1443 |
| 0.1178  | 0.1175 | 0.1778 | 0.1784 | 0.1615 | 0.1619 | 0.1681 | 0.1341 | 0.13   |
| 0.6194  | 0.2442 | 0.2058 | 0.1976 | 0.2055 | 0.1915 | 0.2176 | 0.1747 | 0.1687 |
| 0.4533  | 0.2328 | 0.2036 | 0.2038 | 0.2048 | 0.2313 | 0.2235 | 0.1884 | 0.1983 |
| 0.0019  | 0.0055 | 0.0114 | 0.0115 | 0.0102 | 0.0105 | 0.01   | 0.0077 | 0.0071 |
| 0.0027  | 0.0072 | 0.0118 | 0.0126 | 0.0108 | 0.0118 | 0.0126 | 0.0106 | 0.0105 |
| 0.0502  | 0.0216 | 0.017  | 0.0181 | 0.0189 | 0.0214 | 0.0226 | 0.018  | 0.0161 |
| 0       | 0      | 0      | 0      | 0      | 0      | 0      | 0      | 0      |
| 0       | 0      | 0      | 0      | 0      | 0      | 0      | 0      | 0      |
| 0.0436  | 0.0166 | 0.0104 | 0.0099 | 0.0092 | 0.0132 | 0.014  | 0.0136 | 0.0117 |
| 0.0006  | 0.0015 | 0.0027 | 0.0027 | 0.0024 | 0.0023 | 0.0023 | 0.0018 | 0.0016 |
| 0.0004  | 0.0023 | 0.0035 | 0.0046 | 0.0043 | 0.0046 | 0.0049 | 0.004  | 0.0042 |
| 0.0147  | 0.0078 | 0.0067 | 0.0078 | 0.0074 | 0.0086 | 0.0095 | 0.0083 | 0.0076 |
| -0.0001 | 0.0002 | 0.0003 | 0.0006 | 0.0006 | 0.0007 | 0.0007 | 0.0007 | 0.0007 |
| 0.0018  | 0.0085 | 0.0103 | 0.0139 | 0.0134 | 0.0158 | 0.0182 | 0.0167 | 0.0184 |
| 0.2524  | 0.1176 | 0.0954 | 0.099  | 0.0931 | 0.1036 | 0.1084 | 0.0929 | 0.0995 |
| 0.5441  | 0.2538 | 0.1961 | 0.2036 | 0.1987 | 0.2187 | 0.2429 | 0.1896 | 0.1722 |
| 0.0393  | 0.0316 | 0.0306 | 0.0451 | 0.045  | 0.0557 | 0.0646 | 0.0567 | 0.0595 |
| 0.0007  | 0.0238 | 0.0349 | 0.0458 | 0.037  | 0.0441 | 0.0553 | 0.0433 | 0.0475 |
| 0.2012  | 0.1005 | 0.0898 | 0.0986 | 0.0925 | 0.1047 | 0.1108 | 0.0948 | 0.0903 |
| 0.0713  | 0.096  | 0.0999 | 0.1419 | 0.1244 | 0.1507 | 0.177  | 0.161  | 0.153  |
| 0.6299  | 0.3216 | 0.2925 | 0.2818 | 0.265  | 0.2749 | 0.2763 | 0.2483 | 0.2123 |
| 0.6182  | 0.3473 | 0.4288 | 0.4007 | 0.3764 | 0.3842 | 0.3841 | 0.3216 | 0.2701 |

|        |        |        |        |        |        |        |        |        |
|--------|--------|--------|--------|--------|--------|--------|--------|--------|
| 0.0269 | 0.0954 | 0.1999 | 0.202  | 0.1843 | 0.1767 | 0.1934 | 0.1424 | 0.1367 |
| 0.0317 | 0.0962 | 0.1904 | 0.1955 | 0.1703 | 0.1599 | 0.179  | 0.1365 | 0.1204 |
| 0.1378 | 0.1376 | 0.2306 | 0.2215 | 0.1949 | 0.1894 | 0.1873 | 0.1407 | 0.1275 |
| 0.0438 | 0.1311 | 0.2319 | 0.2448 | 0.2131 | 0.2083 | 0.2203 | 0.1795 | 0.1642 |
| 0.0432 | 0.1119 | 0.1995 | 0.199  | 0.1769 | 0.1737 | 0.1665 | 0.1305 | 0.1331 |
| 0.0929 | 0.1426 | 0.2364 | 0.2329 | 0.2106 | 0.2013 | 0.2032 | 0.1619 | 0.1566 |
| 0.1423 | 0.1847 | 0.2957 | 0.2945 | 0.2628 | 0.2588 | 0.2584 | 0.1948 | 0.1867 |
| 0.0369 | 0.0937 | 0.165  | 0.1759 | 0.1581 | 0.1495 | 0.1513 | 0.1177 | 0.1247 |
| 0.0543 | 0.0903 | 0.1146 | 0.154  | 0.1339 | 0.1611 | 0.1812 | 0.1542 | 0.1509 |
| 0.0129 | 0.048  | 0.0784 | 0.1084 | 0.0862 | 0.1174 | 0.1304 | 0.1133 | 0.1197 |
| 0.0318 | 0.0898 | 0.1589 | 0.1708 | 0.1481 | 0.1508 | 0.1548 | 0.1342 | 0.1404 |
| 0.0935 | 0.121  | 0.2039 | 0.2081 | 0.1864 | 0.1882 | 0.1875 | 0.1473 | 0.1378 |
| 0.0384 | 0.1014 | 0.1938 | 0.2016 | 0.1725 | 0.175  | 0.1744 | 0.1357 | 0.127  |
| 0.0633 | 0.1107 | 0.1858 | 0.1941 | 0.1794 | 0.1797 | 0.1904 | 0.1356 | 0.1304 |
| 0.0267 | 0.0806 | 0.1127 | 0.1497 | 0.1353 | 0.1427 | 0.1674 | 0.1529 | 0.1595 |
| 0.1904 | 0.1233 | 0.1091 | 0.1427 | 0.1306 | 0.1527 | 0.181  | 0.1522 | 0.1532 |
| 0.188  | 0.1456 | 0.1786 | 0.1979 | 0.1814 | 0.1944 | 0.2037 | 0.169  | 0.1628 |
| 0.0365 | 0.0867 | 0.1575 | 0.1679 | 0.1424 | 0.1456 | 0.1591 | 0.1285 | 0.1202 |
| 0.0202 | 0.042  | 0.046  | 0.0856 | 0.0778 | 0.099  | 0.1256 | 0.1077 | 0.1079 |
| 0.3294 | 0.1923 | 0.1765 | 0.2029 | 0.1902 | 0.2136 | 0.22   | 0.1966 | 0.1895 |
| 0.0387 | 0.0569 | 0.0731 | 0.0986 | 0.0855 | 0.0981 | 0.1195 | 0.0997 | 0.0994 |
| 0.2599 | 0.187  | 0.2482 | 0.233  | 0.2116 | 0.2137 | 0.2149 | 0.1741 | 0.1678 |
| 0.6489 | 0.3045 | 0.3099 | 0.2855 | 0.2752 | 0.3189 | 0.3105 | 0.2794 | 0.2272 |
| 0.4399 | 0.253  | 0.2998 | 0.2747 | 0.2606 | 0.2523 | 0.255  | 0.2156 | 0.202  |
| 0.098  | 0.1401 | 0.2314 | 0.2393 | 0.2156 | 0.2115 | 0.2101 | 0.1574 | 0.1492 |
| 0.0603 | 0.1075 | 0.1806 | 0.1968 | 0.1706 | 0.1745 | 0.1843 | 0.1433 | 0.1368 |
| 0.0272 | 0.0763 | 0.1363 | 0.1561 | 0.1459 | 0.1483 | 0.1547 | 0.1263 | 0.1278 |
| 0.1535 | 0.1763 | 0.26   | 0.2638 | 0.2395 | 0.2399 | 0.2482 | 0.1988 | 0.1851 |
| 0.0526 | 0.0939 | 0.1396 | 0.1499 | 0.1333 | 0.1479 | 0.1571 | 0.1316 | 0.1378 |
| 0.6287 | 0.2513 | 0.2107 | 0.1935 | 0.1837 | 0.1949 | 0.2074 | 0.1646 | 0.169  |
| 0.5914 | 0.2627 | 0.2263 | 0.1753 | 0.1599 | 0.2046 | 0.2342 | 0.1996 | 0.1654 |
| 0.0708 | 0.0523 | 0.0581 | 0.0697 | 0.0625 | 0.0722 | 0.0768 | 0.0688 | 0.0655 |
| -0.001 | 0.0021 | 0.0026 | 0.0057 | 0.0055 | 0.0068 | 0.0087 | 0.0077 | 0.0085 |
| 0      | 0      | 0      | 0      | 0      | 0      | 0      | 0      | 0      |
| 0      | 0      | 0      | 0      | 0      | 0      | 0      | 0      | 0      |
| 0      | 0      | 0      | 0      | 0      | 0      | 0      | 0      | 0      |
| 0.0307 | 0.0154 | 0.0129 | 0.0124 | 0.0116 | 0.0129 | 0.0139 | 0.0125 | 0.0107 |
| 0.0004 | 0.0012 | 0.0024 | 0.0023 | 0.0021 | 0.0018 | 0.0019 | 0.0015 | 0.0014 |
| 0.0003 | 0.0007 | 0.0012 | 0.0013 | 0.0012 | 0.0011 | 0.0011 | 0.0009 | 0.0009 |
| 0      | 0      | 0      | 0      | 0      | 0      | 0      | 0      | 0      |
| 0      | 0      | 0      | 0      | 0      | 0      | 0      | 0      | 0      |
| 0.0959 | 0.0475 | 0.038  | 0.0374 | 0.0409 | 0.0424 | 0.0395 | 0.034  | 0.0339 |
| 0.3785 | 0.1925 | 0.173  | 0.1611 | 0.1542 | 0.1626 | 0.1723 | 0.1412 | 0.1269 |
| 0.5001 | 0.2371 | 0.1917 | 0.197  | 0.1926 | 0.2188 | 0.2486 | 0.2066 | 0.1882 |

|         |        |        |        |        |        |        |        |        |
|---------|--------|--------|--------|--------|--------|--------|--------|--------|
| 0.34    | 0.1802 | 0.1901 | 0.1882 | 0.1725 | 0.1859 | 0.1952 | 0.1659 | 0.1651 |
| 0.1013  | 0.0527 | 0.0489 | 0.0536 | 0.0541 | 0.0609 | 0.0659 | 0.0595 | 0.0598 |
| 0.2335  | 0.1058 | 0.0763 | 0.0777 | 0.076  | 0.0933 | 0.0992 | 0.0808 | 0.0735 |
| 0.2796  | 0.1583 | 0.152  | 0.1678 | 0.1633 | 0.1889 | 0.226  | 0.198  | 0.2001 |
| 0.9332  | 0.4474 | 0.3792 | 0.317  | 0.3251 | 0.3762 | 0.352  | 0.2746 | 0.2653 |
| 1.0719  | 0.5176 | 0.4154 | 0.3672 | 0.3182 | 0.3548 | 0.3385 | 0.2798 | 0.2277 |
| 0.4774  | 0.2635 | 0.2721 | 0.2584 | 0.2483 | 0.2573 | 0.271  | 0.2229 | 0.2347 |
| 0.5349  | 0.3019 | 0.3292 | 0.2938 | 0.2841 | 0.2905 | 0.3005 | 0.2633 | 0.244  |
| 0.1538  | 0.1452 | 0.2359 | 0.2309 | 0.2134 | 0.2013 | 0.2031 | 0.1668 | 0.1512 |
| 0.0546  | 0.1379 | 0.249  | 0.2619 | 0.2387 | 0.2256 | 0.2331 | 0.1865 | 0.1819 |
| 0.1356  | 0.1405 | 0.2161 | 0.2146 | 0.1932 | 0.1939 | 0.1898 | 0.1523 | 0.137  |
| 0.478   | 0.3021 | 0.3424 | 0.3201 | 0.3056 | 0.3081 | 0.3126 | 0.2426 | 0.233  |
| 0.1924  | 0.1665 | 0.2464 | 0.2437 | 0.228  | 0.2253 | 0.2285 | 0.1804 | 0.1723 |
| 0.0053  | 0.0601 | 0.1044 | 0.1286 | 0.1154 | 0.1145 | 0.1293 | 0.1113 | 0.1194 |
| 0.0465  | 0.0634 | 0.0903 | 0.1229 | 0.1001 | 0.1338 | 0.1681 | 0.1599 | 0.1753 |
| -0.0414 | 0.0256 | 0.075  | 0.1233 | 0.0998 | 0.1339 | 0.1577 | 0.1342 | 0.1388 |
| 0.0038  | 0.0645 | 0.0828 | 0.112  | 0.0975 | 0.1076 | 0.137  | 0.1241 | 0.1341 |
| 0.0771  | 0.0995 | 0.1222 | 0.1439 | 0.1266 | 0.1451 | 0.1528 | 0.1325 | 0.1316 |
| 0.0272  | 0.0852 | 0.1125 | 0.1378 | 0.1211 | 0.1341 | 0.1402 | 0.1246 | 0.1264 |
| 0.2918  | 0.1697 | 0.1685 | 0.1811 | 0.1811 | 0.2026 | 0.2168 | 0.1795 | 0.1686 |
| 0.6515  | 0.3265 | 0.2711 | 0.2778 | 0.2847 | 0.3179 | 0.3152 | 0.2776 | 0.2879 |
| 0.7206  | 0.3774 | 0.3323 | 0.3307 | 0.3195 | 0.343  | 0.3568 | 0.3447 | 0.3178 |
| 0.4285  | 0.2437 | 0.2336 | 0.2203 | 0.2132 | 0.2308 | 0.2331 | 0.1907 | 0.1916 |
| 0.2125  | 0.1511 | 0.1752 | 0.193  | 0.1794 | 0.1962 | 0.2078 | 0.1707 | 0.1667 |
| 0.0443  | 0.0862 | 0.1223 | 0.1471 | 0.1343 | 0.1507 | 0.1662 | 0.1358 | 0.1355 |
| 0.0936  | 0.0928 | 0.1307 | 0.1568 | 0.1465 | 0.1691 | 0.1887 | 0.1546 | 0.1533 |
| 0.0784  | 0.0968 | 0.1377 | 0.1552 | 0.1378 | 0.1528 | 0.1636 | 0.1383 | 0.136  |
| 0.4501  | 0.2547 | 0.2654 | 0.2384 | 0.2224 | 0.2208 | 0.2169 | 0.1597 | 0.1543 |
| 0.6757  | 0.3053 | 0.2791 | 0.2633 | 0.2573 | 0.2534 | 0.2625 | 0.2077 | 0.1846 |
| 0.441   | 0.2489 | 0.2687 | 0.243  | 0.2409 | 0.2531 | 0.2564 | 0.211  | 0.1735 |
| 0.2615  | 0.1931 | 0.2608 | 0.252  | 0.2423 | 0.2434 | 0.2442 | 0.1888 | 0.1758 |
| 0.052   | 0.1101 | 0.1799 | 0.1948 | 0.1621 | 0.1577 | 0.1632 | 0.1375 | 0.1343 |
| 0.0301  | 0.0893 | 0.155  | 0.1701 | 0.1547 | 0.1565 | 0.1606 | 0.1357 | 0.1282 |
| 0.0128  | 0.0704 | 0.132  | 0.1542 | 0.1355 | 0.1388 | 0.152  | 0.1191 | 0.1052 |
| 0.1072  | 0.0917 | 0.1255 | 0.1435 | 0.1293 | 0.145  | 0.1601 | 0.1345 | 0.1325 |
| 0.5845  | 0.253  | 0.2196 | 0.2177 | 0.2245 | 0.2759 | 0.2913 | 0.2652 | 0.2483 |
| 0.5392  | 0.2344 | 0.1868 | 0.1847 | 0.2001 | 0.234  | 0.225  | 0.2029 | 0.1886 |
| 0.3222  | 0.1604 | 0.1488 | 0.1337 | 0.1184 | 0.1363 | 0.1533 | 0.1302 | 0.1226 |
| 0.0579  | 0.0297 | 0.0364 | 0.0354 | 0.0349 | 0.036  | 0.0348 | 0.0295 | 0.0249 |
| 0.0549  | 0.0218 | 0.0178 | 0.0145 | 0.0126 | 0.0151 | 0.014  | 0.0139 | 0.0139 |
| 0       | 0      | 0      | 0      | 0      | 0      | 0      | 0      | 0      |
| 0       | 0      | 0      | 0      | 0      | 0      | 0      | 0      | 0      |
| 0.0001  | 0.0005 | 0.0011 | 0.0012 | 0.0011 | 0.0011 | 0.0011 | 0.0009 | 0.0009 |
| 0.0365  | 0.0169 | 0.0142 | 0.0163 | 0.0149 | 0.0156 | 0.0163 | 0.0138 | 0.0119 |

|         |        |        |        |        |        |        |        |        |
|---------|--------|--------|--------|--------|--------|--------|--------|--------|
| 0.0652  | 0.0239 | 0.0167 | 0.0169 | 0.0193 | 0.0222 | 0.0236 | 0.0184 | 0.0171 |
| 0       | 0      | 0      | 0      | 0      | 0      | 0      | 0      | 0      |
| 0.0232  | 0.0135 | 0.0113 | 0.0135 | 0.0141 | 0.0157 | 0.0175 | 0.0157 | 0.0154 |
| 0.2025  | 0.0955 | 0.0821 | 0.081  | 0.0782 | 0.0925 | 0.0891 | 0.0722 | 0.0654 |
| 0.2493  | 0.1268 | 0.1187 | 0.1216 | 0.1199 | 0.1289 | 0.1364 | 0.1229 | 0.1236 |
| 0.0922  | 0.0672 | 0.075  | 0.0866 | 0.0838 | 0.0964 | 0.1025 | 0.0899 | 0.0892 |
| 0.3141  | 0.1549 | 0.1491 | 0.1517 | 0.1532 | 0.1696 | 0.1745 | 0.1503 | 0.1515 |
| 0.083   | 0.0372 | 0.028  | 0.0207 | 0.015  | 0.0172 | 0.0168 | 0.0189 | 0.0172 |
| 0.0984  | 0.0564 | 0.0541 | 0.0619 | 0.0587 | 0.0713 | 0.0815 | 0.0717 | 0.071  |
| 0.5353  | 0.2592 | 0.2407 | 0.2165 | 0.2199 | 0.2481 | 0.2648 | 0.2287 | 0.2016 |
| 0.9173  | 0.448  | 0.3729 | 0.2894 | 0.2892 | 0.2975 | 0.2804 | 0.2438 | 0.2024 |
| 0.5958  | 0.2737 | 0.2246 | 0.2116 | 0.1942 | 0.2133 | 0.2221 | 0.2007 | 0.2073 |
| 0.7607  | 0.4266 | 0.4013 | 0.3456 | 0.3186 | 0.3376 | 0.3208 | 0.2897 | 0.2661 |
| 0.487   | 0.2765 | 0.2921 | 0.2885 | 0.2694 | 0.2962 | 0.2833 | 0.2242 | 0.2091 |
| 0.0636  | 0.1355 | 0.2298 | 0.2114 | 0.1968 | 0.1923 | 0.1989 | 0.1695 | 0.1721 |
| 0.027   | 0.1091 | 0.1994 | 0.2018 | 0.1854 | 0.189  | 0.1937 | 0.1505 | 0.1354 |
| 0.2621  | 0.1745 | 0.219  | 0.2064 | 0.1887 | 0.1871 | 0.1805 | 0.1463 | 0.1333 |
| 0.6545  | 0.3473 | 0.3473 | 0.3199 | 0.3199 | 0.3105 | 0.3077 | 0.2212 | 0.1956 |
| 0.2754  | 0.1764 | 0.1994 | 0.207  | 0.1982 | 0.2188 | 0.2258 | 0.1804 | 0.1671 |
| 0.0033  | 0.0464 | 0.0783 | 0.1116 | 0.1137 | 0.1392 | 0.1677 | 0.1498 | 0.1538 |
| 0.0774  | 0.0954 | 0.1119 | 0.1591 | 0.1482 | 0.1612 | 0.1934 | 0.1608 | 0.1791 |
| -0.0032 | 0.0578 | 0.0739 | 0.1282 | 0.1241 | 0.1499 | 0.1678 | 0.1579 | 0.1706 |
| 0.0985  | 0.0906 | 0.0997 | 0.147  | 0.1334 | 0.1661 | 0.1854 | 0.1668 | 0.1642 |
| 0.0411  | 0.0687 | 0.0628 | 0.102  | 0.0847 | 0.1072 | 0.1276 | 0.1144 | 0.1285 |
| 0.0353  | 0.0636 | 0.0942 | 0.1187 | 0.1101 | 0.1219 | 0.1335 | 0.1048 | 0.113  |
| 0.5361  | 0.2539 | 0.2233 | 0.2072 | 0.2143 | 0.2258 | 0.2281 | 0.1894 | 0.1722 |
| 0.6165  | 0.2824 | 0.2432 | 0.2277 | 0.2077 | 0.2348 | 0.259  | 0.2315 | 0.2031 |
| 0.0771  | 0.1019 | 0.1361 | 0.1628 | 0.1586 | 0.1695 | 0.1866 | 0.1642 | 0.1687 |
| -0.0207 | 0.0424 | 0.04   | 0.0892 | 0.0798 | 0.1168 | 0.1516 | 0.1243 | 0.1335 |
| 0.2906  | 0.1593 | 0.1461 | 0.1562 | 0.1451 | 0.1589 | 0.1709 | 0.139  | 0.1447 |
| 0.2672  | 0.1683 | 0.1788 | 0.1859 | 0.1707 | 0.1904 | 0.1901 | 0.1642 | 0.1618 |
| 0.2195  | 0.1313 | 0.1336 | 0.145  | 0.1395 | 0.1581 | 0.1727 | 0.1472 | 0.1437 |
| 0.0118  | 0.0582 | 0.0935 | 0.1081 | 0.0943 | 0.1136 | 0.1286 | 0.1097 | 0.1084 |
| 0.0195  | 0.0853 | 0.1837 | 0.1754 | 0.1524 | 0.1411 | 0.1443 | 0.1102 | 0.0936 |
| 0.236   | 0.1829 | 0.2517 | 0.2444 | 0.2282 | 0.2288 | 0.2329 | 0.1927 | 0.1777 |
| 0.2522  | 0.202  | 0.2919 | 0.2856 | 0.2685 | 0.2588 | 0.2502 | 0.2081 | 0.1989 |
| 0.234   | 0.1611 | 0.2299 | 0.2234 | 0.2075 | 0.2057 | 0.1981 | 0.166  | 0.1522 |
| 0.3578  | 0.2347 | 0.2971 | 0.2961 | 0.2748 | 0.286  | 0.2799 | 0.2403 | 0.2298 |
| 0.0056  | 0.0858 | 0.1382 | 0.175  | 0.1653 | 0.1708 | 0.1889 | 0.1507 | 0.1523 |
| -0.012  | 0.0285 | 0.0623 | 0.0816 | 0.0675 | 0.0905 | 0.1029 | 0.0863 | 0.0875 |
| 0.2619  | 0.165  | 0.1922 | 0.1931 | 0.1756 | 0.1936 | 0.1969 | 0.1579 | 0.139  |
| 0.6238  | 0.2316 | 0.174  | 0.1956 | 0.2168 | 0.1724 | 0.1766 | 0.1368 | 0.1199 |
| 0.9568  | 0.3932 | 0.3718 | 0.3331 | 0.3442 | 0.3357 | 0.3361 | 0.3139 | 0.3087 |
| 1.0858  | 0.4676 | 0.3685 | 0.2892 | 0.2972 | 0.3265 | 0.3264 | 0.3677 | 0.324  |

|         |        |        |        |        |        |        |        |        |
|---------|--------|--------|--------|--------|--------|--------|--------|--------|
| 0.3172  | 0.146  | 0.1195 | 0.0967 | 0.1029 | 0.1077 | 0.1093 | 0.106  | 0.0853 |
| 0       | 0      | 0      | 0      | 0      | 0      | 0      | 0      | 0      |
| 0       | 0      | 0      | 0      | 0      | 0      | 0      | 0      | 0      |
| 0       | 0      | 0      | 0      | 0      | 0      | 0      | 0      | 0      |
| 0.0533  | 0.0235 | 0.0187 | 0.0167 | 0.0151 | 0.0149 | 0.0155 | 0.0146 | 0.0144 |
| 0.0375  | 0.0164 | 0.0129 | 0.0112 | 0.011  | 0.0129 | 0.0136 | 0.0105 | 0.0116 |
| 0       | 0.0003 | 0.0005 | 0.0007 | 0.0006 | 0.0008 | 0.001  | 0.0009 | 0.0009 |
| 0       | 0      | 0      | 0      | 0      | 0      | 0      | 0      | 0      |
| 0.0002  | 0.0005 | 0.0011 | 0.0011 | 0.001  | 0.0009 | 0.0009 | 0.0007 | 0.0006 |
| 0.1884  | 0.0809 | 0.0632 | 0.0608 | 0.0637 | 0.0642 | 0.0731 | 0.0622 | 0.0625 |
| 0.4128  | 0.2118 | 0.1885 | 0.1727 | 0.1562 | 0.1655 | 0.1525 | 0.1284 | 0.109  |
| 0.3706  | 0.158  | 0.1097 | 0.0883 | 0.0938 | 0.122  | 0.1265 | 0.1226 | 0.1053 |
| 0.1849  | 0.0909 | 0.0842 | 0.0926 | 0.0938 | 0.1043 | 0.0951 | 0.0734 | 0.0703 |
| 0.0689  | 0.0418 | 0.0464 | 0.0443 | 0.043  | 0.0459 | 0.0442 | 0.0376 | 0.0383 |
| -0.0081 | 0.013  | 0.0173 | 0.034  | 0.0226 | 0.0369 | 0.049  | 0.0467 | 0.0459 |
| 0.1118  | 0.0912 | 0.1166 | 0.1353 | 0.1298 | 0.1496 | 0.1646 | 0.1467 | 0.1493 |
| 0.1634  | 0.1229 | 0.155  | 0.1605 | 0.1478 | 0.1564 | 0.1629 | 0.131  | 0.1218 |
| 0.0356  | 0.09   | 0.1776 | 0.1743 | 0.1534 | 0.1481 | 0.1386 | 0.1093 | 0.1065 |
| 0.4889  | 0.279  | 0.2992 | 0.2714 | 0.2492 | 0.2882 | 0.2893 | 0.2333 | 0.203  |
| 0.2104  | 0.1615 | 0.2331 | 0.2382 | 0.2202 | 0.2238 | 0.2218 | 0.1735 | 0.162  |
| 0.0526  | 0.1358 | 0.2326 | 0.235  | 0.2105 | 0.1983 | 0.21   | 0.1582 | 0.144  |
| 0.0361  | 0.1096 | 0.2074 | 0.2108 | 0.1872 | 0.1849 | 0.1943 | 0.1406 | 0.1244 |
| 0.1078  | 0.1193 | 0.2031 | 0.21   | 0.2024 | 0.1972 | 0.1903 | 0.1489 | 0.1293 |
| 0.2222  | 0.1553 | 0.22   | 0.2176 | 0.2089 | 0.2036 | 0.204  | 0.1478 | 0.1444 |
| 0.0525  | 0.0813 | 0.1409 | 0.1484 | 0.1439 | 0.1479 | 0.1577 | 0.1274 | 0.1207 |
| 0.0059  | 0.0576 | 0.1237 | 0.1339 | 0.13   | 0.1393 | 0.1457 | 0.1083 | 0.1102 |
| 0.1687  | 0.1235 | 0.171  | 0.1739 | 0.155  | 0.1608 | 0.1664 | 0.1352 | 0.1328 |
| 0.131   | 0.0999 | 0.1133 | 0.1276 | 0.1169 | 0.1318 | 0.1457 | 0.1238 | 0.1264 |
| 0.0994  | 0.0729 | 0.0706 | 0.1013 | 0.0867 | 0.1099 | 0.1323 | 0.1099 | 0.1158 |
| 0.2     | 0.1469 | 0.148  | 0.1809 | 0.1656 | 0.2048 | 0.2208 | 0.2023 | 0.2057 |
| 0.2279  | 0.1621 | 0.1915 | 0.201  | 0.1893 | 0.2035 | 0.2191 | 0.1835 | 0.176  |
| 0.2477  | 0.1475 | 0.1537 | 0.1486 | 0.1386 | 0.1466 | 0.143  | 0.1163 | 0.1172 |
| 0.5119  | 0.2944 | 0.2868 | 0.277  | 0.2469 | 0.2458 | 0.242  | 0.2122 | 0.1869 |
| 0.2654  | 0.1862 | 0.2424 | 0.236  | 0.2174 | 0.2201 | 0.2236 | 0.1928 | 0.1866 |
| 0.4465  | 0.2521 | 0.2495 | 0.2478 | 0.2323 | 0.2363 | 0.2348 | 0.182  | 0.1857 |
| 0.1122  | 0.1049 | 0.157  | 0.164  | 0.1524 | 0.1591 | 0.1641 | 0.1326 | 0.1264 |
| 0.1192  | 0.1054 | 0.16   | 0.1529 | 0.1372 | 0.1351 | 0.1302 | 0.1082 | 0.0998 |
| 0.2743  | 0.1902 | 0.2489 | 0.2514 | 0.227  | 0.2261 | 0.2373 | 0.1938 | 0.177  |
| 0.1663  | 0.1346 | 0.1799 | 0.1874 | 0.1715 | 0.178  | 0.1811 | 0.1449 | 0.136  |
| 0.1048  | 0.1044 | 0.1624 | 0.1579 | 0.1421 | 0.145  | 0.1499 | 0.1237 | 0.1138 |
| 0.4936  | 0.2674 | 0.3171 | 0.2725 | 0.2563 | 0.2862 | 0.2783 | 0.2406 | 0.2259 |
| 0.3893  | 0.2379 | 0.3029 | 0.2889 | 0.2733 | 0.2759 | 0.2811 | 0.2378 | 0.2133 |
| 0.0941  | 0.1059 | 0.1783 | 0.1832 | 0.1722 | 0.171  | 0.1819 | 0.1444 | 0.1312 |
| 0.2998  | 0.2029 | 0.2666 | 0.2553 | 0.2315 | 0.2276 | 0.2198 | 0.1864 | 0.1704 |

|         |        |        |        |        |        |        |        |        |
|---------|--------|--------|--------|--------|--------|--------|--------|--------|
| 0.1163  | 0.1291 | 0.1935 | 0.2099 | 0.1893 | 0.1996 | 0.2118 | 0.1633 | 0.1566 |
| -0.0418 | 0.0256 | 0.0545 | 0.0802 | 0.067  | 0.0913 | 0.1083 | 0.0946 | 0.1018 |
| 0.0805  | 0.1006 | 0.152  | 0.1697 | 0.1568 | 0.1681 | 0.1779 | 0.1471 | 0.1406 |
| 0.4349  | 0.2377 | 0.215  | 0.2115 | 0.1973 | 0.2106 | 0.2033 | 0.1572 | 0.1433 |
| 0.2975  | 0.1396 | 0.15   | 0.1373 | 0.1347 | 0.1404 | 0.1372 | 0.1221 | 0.1145 |
| 0.1222  | 0.055  | 0.0417 | 0.0332 | 0.0307 | 0.032  | 0.0347 | 0.0288 | 0.0283 |
| 0       | 0      | 0      | 0      | 0      | 0      | 0      | 0      | 0      |
| 0.1459  | 0.0703 | 0.053  | 0.0518 | 0.052  | 0.0571 | 0.0526 | 0.0485 | 0.0482 |
| 0       | 0      | 0      | 0      | 0      | 0      | 0      | 0      | 0      |
| 0       | 0      | 0      | 0      | 0      | 0      | 0      | 0      | 0      |
| 0.0546  | 0.0232 | 0.0193 | 0.0169 | 0.017  | 0.0152 | 0.0152 | 0.0148 | 0.0135 |
| 0       | 0      | 0      | 0      | 0      | 0      | 0      | 0      | 0      |
| -0.0004 | 0.0004 | 0.0005 | 0.0013 | 0.001  | 0.0013 | 0.0016 | 0.0014 | 0.0014 |
| 0.0639  | 0.0223 | 0.017  | 0.0137 | 0.0131 | 0.0141 | 0.0147 | 0.013  | 0.0086 |
| 0       | 0      | 0      | 0      | 0      | 0      | 0      | 0      | 0      |
| 0       | 0      | 0      | 0      | 0      | 0      | 0      | 0      | 0      |
| 0.1517  | 0.0684 | 0.0581 | 0.0605 | 0.0544 | 0.0639 | 0.074  | 0.0635 | 0.0491 |
| 0.4477  | 0.2121 | 0.1944 | 0.1812 | 0.1925 | 0.2223 | 0.232  | 0.1857 | 0.182  |
| 0.103   | 0.0493 | 0.0409 | 0.0336 | 0.0355 | 0.0408 | 0.04   | 0.0377 | 0.0336 |
| 0.2343  | 0.1233 | 0.1146 | 0.1181 | 0.1198 | 0.1281 | 0.1376 | 0.1154 | 0.1056 |
| 0.1488  | 0.0755 | 0.0667 | 0.0686 | 0.0665 | 0.0753 | 0.0796 | 0.0686 | 0.0701 |
| 0.0516  | 0.1167 | 0.1563 | 0.2008 | 0.173  | 0.1987 | 0.217  | 0.1894 | 0.1807 |
| 0.0351  | 0.0939 | 0.1543 | 0.1815 | 0.1677 | 0.1778 | 0.1813 | 0.1428 | 0.1475 |
| 0.1434  | 0.1193 | 0.1637 | 0.1708 | 0.1593 | 0.1619 | 0.1675 | 0.1376 | 0.1314 |
| 0.3814  | 0.1789 | 0.1759 | 0.1721 | 0.1548 | 0.1778 | 0.1862 | 0.17   | 0.1515 |
| 0.2338  | 0.171  | 0.2591 | 0.2457 | 0.2197 | 0.2223 | 0.2326 | 0.1777 | 0.1586 |
| 0.0434  | 0.131  | 0.274  | 0.2675 | 0.2386 | 0.2359 | 0.2452 | 0.1943 | 0.1842 |
| 0.181   | 0.169  | 0.2547 | 0.2418 | 0.2296 | 0.2253 | 0.2271 | 0.1848 | 0.1697 |
| 0.1149  | 0.1443 | 0.2281 | 0.2276 | 0.1966 | 0.1812 | 0.1888 | 0.1583 | 0.1395 |
| 0.0622  | 0.1265 | 0.2315 | 0.226  | 0.2056 | 0.1944 | 0.205  | 0.1529 | 0.1381 |
| 0.0527  | 0.1087 | 0.1855 | 0.1863 | 0.1683 | 0.173  | 0.1712 | 0.1317 | 0.1243 |
| 0.0918  | 0.1303 | 0.2048 | 0.219  | 0.2004 | 0.2069 | 0.2058 | 0.1588 | 0.1529 |
| 0.1333  | 0.1306 | 0.2242 | 0.2212 | 0.2058 | 0.1955 | 0.1958 | 0.1512 | 0.1425 |
| 0.0832  | 0.112  | 0.1767 | 0.1795 | 0.1588 | 0.1569 | 0.1672 | 0.1348 | 0.1229 |
| 0.1282  | 0.1143 | 0.1427 | 0.1663 | 0.1534 | 0.1698 | 0.1816 | 0.1596 | 0.1631 |
| 0.0959  | 0.0768 | 0.0844 | 0.1187 | 0.111  | 0.1343 | 0.1402 | 0.1227 | 0.12   |
| 0.1656  | 0.1184 | 0.1324 | 0.1522 | 0.1462 | 0.1767 | 0.187  | 0.1648 | 0.159  |
| 0.0782  | 0.089  | 0.1319 | 0.1413 | 0.135  | 0.1433 | 0.151  | 0.1205 | 0.1156 |
| 0.455   | 0.279  | 0.2908 | 0.2696 | 0.2609 | 0.2692 | 0.2532 | 0.2128 | 0.2006 |
| 0.3602  | 0.1909 | 0.21   | 0.1914 | 0.1866 | 0.2035 | 0.2058 | 0.1798 | 0.177  |
| 0.7507  | 0.3909 | 0.3843 | 0.3142 | 0.2684 | 0.2323 | 0.2318 | 0.1922 | 0.1781 |
| 0.1113  | 0.1417 | 0.2328 | 0.232  | 0.203  | 0.2017 | 0.2116 | 0.1605 | 0.1552 |
| 0.1339  | 0.1624 | 0.2559 | 0.2567 | 0.2385 | 0.2384 | 0.2455 | 0.2    | 0.1953 |
| 0.0125  | 0.0888 | 0.1693 | 0.1723 | 0.1579 | 0.1578 | 0.1437 | 0.1012 | 0.1152 |

|         |        |        |        |        |        |        |        |        |
|---------|--------|--------|--------|--------|--------|--------|--------|--------|
| 0.0762  | 0.1129 | 0.1853 | 0.1894 | 0.1698 | 0.1763 | 0.1828 | 0.1534 | 0.1531 |
| 0.1311  | 0.1622 | 0.2689 | 0.2657 | 0.2396 | 0.2364 | 0.2304 | 0.186  | 0.1757 |
| 0.2692  | 0.1702 | 0.2018 | 0.1892 | 0.1752 | 0.178  | 0.179  | 0.1484 | 0.1321 |
| 0.3746  | 0.2043 | 0.2239 | 0.2131 | 0.1923 | 0.2012 | 0.2068 | 0.1575 | 0.1214 |
| 0.173   | 0.1617 | 0.253  | 0.2512 | 0.2258 | 0.227  | 0.2272 | 0.1759 | 0.1657 |
| 0.0447  | 0.115  | 0.2279 | 0.237  | 0.2243 | 0.2059 | 0.2056 | 0.1595 | 0.1579 |
| 0.0203  | 0.1001 | 0.1978 | 0.2158 | 0.2031 | 0.1938 | 0.2003 | 0.1613 | 0.1567 |
| 0.0625  | 0.0851 | 0.0941 | 0.137  | 0.1257 | 0.1722 | 0.1974 | 0.1757 | 0.1798 |
| -0.0094 | 0.0408 | 0.0558 | 0.0999 | 0.0924 | 0.1158 | 0.1332 | 0.1274 | 0.136  |
| 0.0041  | 0.0296 | 0.0596 | 0.0672 | 0.0616 | 0.0674 | 0.0729 | 0.057  | 0.0595 |
| -0.004  | 0.0107 | 0.0141 | 0.0227 | 0.0173 | 0.0246 | 0.0302 | 0.0271 | 0.0272 |
| 0.1065  | 0.0775 | 0.0921 | 0.0971 | 0.0916 | 0.0955 | 0.0998 | 0.0831 | 0.0823 |
| 0.023   | 0.0137 | 0.0181 | 0.0176 | 0.0164 | 0.0169 | 0.0164 | 0.0135 | 0.0122 |
| 0.0006  | 0.0014 | 0.0025 | 0.0027 | 0.0022 | 0.0021 | 0.002  | 0.0014 | 0.0013 |
| 0       | 0      | 0      | 0      | 0      | 0      | 0      | 0      | 0      |
| 0       | 0      | 0      | 0      | 0      | 0      | 0      | 0      | 0      |
| 0.0003  | 0.0007 | 0.0012 | 0.0012 | 0.0012 | 0.0011 | 0.0011 | 0.0009 | 0.0008 |
| 0.0081  | 0.0036 | 0.0022 | 0.0019 | 0.002  | 0.002  | 0.0019 | 0.0016 | 0.0012 |
| 0       | 0      | 0      | 0      | 0      | 0      | 0      | 0      | 0      |
| 0       | 0      | 0      | 0      | 0      | 0      | 0      | 0      | 0      |
| 0       | 0      | 0      | 0      | 0      | 0      | 0      | 0      | 0      |
| 0.0416  | 0.0213 | 0.0197 | 0.0179 | 0.0163 | 0.0181 | 0.0191 | 0.0167 | 0.016  |
| 0.057   | 0.0278 | 0.0259 | 0.0252 | 0.0259 | 0.03   | 0.0294 | 0.0252 | 0.0231 |
| 0.0629  | 0.0342 | 0.0328 | 0.0337 | 0.0325 | 0.0359 | 0.0376 | 0.0324 | 0.0303 |
| -0.0019 | 0.0118 | 0.0255 | 0.0329 | 0.0289 | 0.0394 | 0.048  | 0.0373 | 0.0395 |
| 0.0853  | 0.0673 | 0.0736 | 0.0819 | 0.078  | 0.0847 | 0.092  | 0.0808 | 0.0773 |
| 0.0921  | 0.0654 | 0.0719 | 0.0839 | 0.0792 | 0.0851 | 0.0927 | 0.0829 | 0.0826 |
| 0.0152  | 0.0446 | 0.0683 | 0.0874 | 0.0774 | 0.0949 | 0.1088 | 0.0906 | 0.0869 |
| -0.0033 | 0.0681 | 0.107  | 0.1449 | 0.1392 | 0.1685 | 0.1878 | 0.1502 | 0.1577 |
| 0.0126  | 0.0681 | 0.0871 | 0.1197 | 0.105  | 0.1193 | 0.1391 | 0.1177 | 0.1271 |
| 0.0931  | 0.0886 | 0.1143 | 0.1336 | 0.1202 | 0.1312 | 0.1407 | 0.1224 | 0.1188 |
| 0.1236  | 0.13   | 0.1864 | 0.2068 | 0.189  | 0.1971 | 0.2125 | 0.1808 | 0.1787 |
| 0.1033  | 0.1283 | 0.229  | 0.245  | 0.2216 | 0.218  | 0.2278 | 0.1874 | 0.1696 |
| 0.4175  | 0.2335 | 0.2595 | 0.2491 | 0.2261 | 0.2292 | 0.2308 | 0.1966 | 0.1847 |
| 0.6881  | 0.3316 | 0.338  | 0.2973 | 0.2682 | 0.2819 | 0.2811 | 0.2209 | 0.1734 |
| 0.4013  | 0.2421 | 0.3099 | 0.295  | 0.2829 | 0.2963 | 0.2828 | 0.2239 | 0.1966 |
| 0.0135  | 0.081  | 0.1828 | 0.1916 | 0.1684 | 0.1599 | 0.1684 | 0.1314 | 0.1182 |
| 0.1618  | 0.1452 | 0.2045 | 0.2099 | 0.1938 | 0.1996 | 0.1975 | 0.1624 | 0.1554 |
| 0.012   | 0.075  | 0.1709 | 0.1886 | 0.1715 | 0.1724 | 0.1794 | 0.1418 | 0.1351 |
| 0.1952  | 0.1709 | 0.2476 | 0.2527 | 0.2298 | 0.2232 | 0.2147 | 0.1769 | 0.1701 |
| 0.1702  | 0.1574 | 0.2397 | 0.2332 | 0.2213 | 0.2259 | 0.2204 | 0.1708 | 0.1595 |
| 0.008   | 0.0577 | 0.0749 | 0.093  | 0.0748 | 0.0919 | 0.1211 | 0.0937 | 0.1118 |
| 0.0179  | 0.0778 | 0.1061 | 0.1196 | 0.1117 | 0.1237 | 0.1347 | 0.105  | 0.0972 |
| 0.1093  | 0.1102 | 0.1664 | 0.1689 | 0.154  | 0.1532 | 0.1535 | 0.1201 | 0.1097 |

|        |        |        |        |        |        |        |        |        |
|--------|--------|--------|--------|--------|--------|--------|--------|--------|
| 0.0903 | 0.1285 | 0.2348 | 0.2301 | 0.2082 | 0.2155 | 0.209  | 0.157  | 0.1411 |
| 0.1119 | 0.1501 | 0.2428 | 0.2456 | 0.2247 | 0.2224 | 0.2123 | 0.1687 | 0.1657 |
| 0.1656 | 0.1561 | 0.2367 | 0.2249 | 0.2075 | 0.2073 | 0.2184 | 0.173  | 0.1697 |
| 0.1179 | 0.1345 | 0.2173 | 0.2277 | 0.203  | 0.2066 | 0.207  | 0.1783 | 0.1736 |
| 0.0312 | 0.0774 | 0.137  | 0.1486 | 0.1322 | 0.1309 | 0.1405 | 0.1185 | 0.1153 |
| 0.025  | 0.0848 | 0.1593 | 0.1579 | 0.1517 | 0.1459 | 0.1442 | 0.1146 | 0.1004 |
| 0.1615 | 0.1745 | 0.2616 | 0.2528 | 0.233  | 0.2332 | 0.2293 | 0.1851 | 0.1752 |
| 0.2196 | 0.176  | 0.2577 | 0.2578 | 0.2449 | 0.2383 | 0.2457 | 0.2019 | 0.1829 |
| 0.1992 | 0.1691 | 0.272  | 0.2659 | 0.2415 | 0.242  | 0.2366 | 0.1871 | 0.1768 |
| 0.0369 | 0.1049 | 0.1961 | 0.1948 | 0.1759 | 0.172  | 0.1788 | 0.1392 | 0.1315 |
| 0.175  | 0.1658 | 0.2607 | 0.2509 | 0.2333 | 0.2314 | 0.2468 | 0.2038 | 0.1842 |
| 0.2931 | 0.1907 | 0.2659 | 0.2532 | 0.2381 | 0.238  | 0.2491 | 0.1943 | 0.1872 |
| 0.1046 | 0.1351 | 0.2338 | 0.2456 | 0.2067 | 0.2111 | 0.2302 | 0.1798 | 0.173  |
| 0.0042 | 0.0871 | 0.0959 | 0.1383 | 0.1304 | 0.1541 | 0.184  | 0.1683 | 0.1847 |
| 0.0284 | 0.0281 | 0.0271 | 0.0384 | 0.036  | 0.0437 | 0.0463 | 0.0403 | 0.0428 |
| 0.161  | 0.0824 | 0.0848 | 0.0931 | 0.0924 | 0.1034 | 0.1076 | 0.0954 | 0.0937 |
| 0.1291 | 0.0812 | 0.0868 | 0.0903 | 0.0821 | 0.0874 | 0.0867 | 0.0733 | 0.0697 |
| 0.014  | 0.0518 | 0.0932 | 0.1003 | 0.0911 | 0.0933 | 0.0952 | 0.0775 | 0.074  |
| 0.0032 | 0.012  | 0.0214 | 0.0232 | 0.023  | 0.0229 | 0.0244 | 0.0199 | 0.0202 |
| 0.0074 | 0.0033 | 0.0022 | 0.0019 | 0.0021 | 0.0024 | 0.0024 | 0.0022 | 0.002  |
| 0      | 0      | 0      | 0      | 0      | 0      | 0      | 0      | 0      |
| 0      | 0      | 0      | 0      | 0      | 0      | 0      | 0      | 0      |
| 0.0004 | 0.0016 | 0.0024 | 0.0031 | 0.0029 | 0.0032 | 0.0036 | 0.003  | 0.0035 |
| 0.0004 | 0.001  | 0.001  | 0.0015 | 0.0013 | 0.0016 | 0.0021 | 0.0019 | 0.002  |
| 0      | 0      | 0      | 0      | 0      | 0      | 0      | 0      | 0      |
| 0      | 0      | 0      | 0      | 0      | 0      | 0      | 0      | 0      |
| 0.0148 | 0.0057 | 0.004  | 0.0038 | 0.0043 | 0.0049 | 0.0053 | 0.0055 | 0.0046 |
| 0.0703 | 0.0329 | 0.0275 | 0.0257 | 0.025  | 0.0255 | 0.0269 | 0.0222 | 0.0175 |
| 0.0942 | 0.0436 | 0.04   | 0.0447 | 0.0429 | 0.0469 | 0.0463 | 0.0414 | 0.0399 |
| 0.098  | 0.0458 | 0.0384 | 0.0434 | 0.041  | 0.0461 | 0.0449 | 0.044  | 0.0409 |
| 0.3806 | 0.1906 | 0.1956 | 0.2042 | 0.1891 | 0.2094 | 0.2137 | 0.1838 | 0.1841 |
| 0.1152 | 0.0598 | 0.055  | 0.0541 | 0.0502 | 0.0593 | 0.0615 | 0.0489 | 0.0486 |
| 0      | 0      | 0      | 0      | 0      | 0      | 0      | 0      | 0      |
| 0.0199 | 0.0435 | 0.0513 | 0.0598 | 0.0519 | 0.0542 | 0.0549 | 0.0484 | 0.0532 |
| 0.086  | 0.0862 | 0.1191 | 0.1557 | 0.1376 | 0.1612 | 0.1739 | 0.1539 | 0.1625 |
| 0.039  | 0.0779 | 0.0943 | 0.1682 | 0.1698 | 0.1833 | 0.1957 | 0.1729 | 0.181  |
| 0.0059 | 0.0816 | 0.1014 | 0.1525 | 0.1255 | 0.1318 | 0.151  | 0.1172 | 0.1321 |
| 0.0036 | 0.0667 | 0.084  | 0.122  | 0.1044 | 0.121  | 0.1323 | 0.1129 | 0.1189 |
| 0.0426 | 0.0927 | 0.1605 | 0.172  | 0.1626 | 0.1538 | 0.1572 | 0.1311 | 0.1333 |
| 0.3042 | 0.1871 | 0.2285 | 0.214  | 0.2059 | 0.2107 | 0.2282 | 0.1775 | 0.1577 |
| 0.2879 | 0.1927 | 0.2415 | 0.2286 | 0.2184 | 0.2213 | 0.2277 | 0.1828 | 0.1643 |
| 0.2933 | 0.2172 | 0.2648 | 0.2554 | 0.2416 | 0.2437 | 0.2419 | 0.2084 | 0.2066 |
| 0.0761 | 0.1411 | 0.252  | 0.2618 | 0.2352 | 0.2407 | 0.2212 | 0.1817 | 0.155  |
| 0.0486 | 0.0932 | 0.1648 | 0.1881 | 0.1735 | 0.1806 | 0.1889 | 0.1627 | 0.1618 |



|         |        |        |        |        |        |        |        |        |
|---------|--------|--------|--------|--------|--------|--------|--------|--------|
| 0.0673  | 0.0869 | 0.0953 | 0.1265 | 0.1096 | 0.1301 | 0.1417 | 0.1151 | 0.1194 |
| 0.0029  | 0.0835 | 0.1436 | 0.1771 | 0.1714 | 0.1769 | 0.1957 | 0.1548 | 0.1604 |
| 0.122   | 0.1392 | 0.1946 | 0.2106 | 0.1866 | 0.1982 | 0.2054 | 0.17   | 0.1606 |
| 0.0557  | 0.0798 | 0.0941 | 0.1314 | 0.1227 | 0.1549 | 0.1773 | 0.1584 | 0.1799 |
| -0.0093 | 0.0484 | 0.0909 | 0.1265 | 0.1157 | 0.1332 | 0.1488 | 0.1212 | 0.1407 |
| 0.1313  | 0.1378 | 0.217  | 0.2181 | 0.1983 | 0.1911 | 0.1962 | 0.1437 | 0.1352 |
| 0.495   | 0.3117 | 0.3332 | 0.2933 | 0.2897 | 0.2793 | 0.2895 | 0.2293 | 0.1816 |
| 0.2706  | 0.194  | 0.2538 | 0.2515 | 0.2341 | 0.231  | 0.2295 | 0.1782 | 0.1629 |
| 0.0305  | 0.0968 | 0.2001 | 0.2058 | 0.1768 | 0.1618 | 0.1586 | 0.1271 | 0.1204 |
| 0.11    | 0.1227 | 0.1883 | 0.1976 | 0.1811 | 0.186  | 0.1861 | 0.1482 | 0.1469 |
| 0.0361  | 0.0917 | 0.1707 | 0.19   | 0.1675 | 0.1636 | 0.1769 | 0.1342 | 0.1319 |
| 0.2236  | 0.1604 | 0.2082 | 0.2099 | 0.1969 | 0.1967 | 0.191  | 0.1557 | 0.1556 |
| 0.191   | 0.1398 | 0.2095 | 0.2066 | 0.1887 | 0.1835 | 0.1867 | 0.1565 | 0.137  |
| 0.2476  | 0.1907 | 0.2603 | 0.2464 | 0.2215 | 0.2264 | 0.2246 | 0.1861 | 0.1737 |
| 0.5152  | 0.2486 | 0.2473 | 0.216  | 0.2049 | 0.212  | 0.2091 | 0.1689 | 0.1348 |
| 0.3711  | 0.26   | 0.345  | 0.3089 | 0.2881 | 0.2997 | 0.3046 | 0.256  | 0.2209 |
| 0.2605  | 0.1733 | 0.2054 | 0.1969 | 0.1805 | 0.1823 | 0.1805 | 0.133  | 0.1211 |
| 0.326   | 0.1865 | 0.2323 | 0.2264 | 0.2192 | 0.2348 | 0.2326 | 0.1939 | 0.1946 |
| 0.0254  | 0.108  | 0.1578 | 0.1914 | 0.1779 | 0.2018 | 0.2135 | 0.1772 | 0.1845 |
| 0.057   | 0.0592 | 0.0881 | 0.0925 | 0.0832 | 0.0892 | 0.0931 | 0.0697 | 0.0673 |
| 0.1256  | 0.0713 | 0.0746 | 0.073  | 0.0715 | 0.0766 | 0.0795 | 0.0675 | 0.0618 |
| 0.1175  | 0.0625 | 0.0625 | 0.068  | 0.0671 | 0.0744 | 0.078  | 0.0675 | 0.0673 |
| 0.0578  | 0.0543 | 0.0687 | 0.0803 | 0.0741 | 0.0843 | 0.0885 | 0.0728 | 0.0736 |
| 0.0579  | 0.0397 | 0.0479 | 0.0493 | 0.0471 | 0.0494 | 0.051  | 0.0416 | 0.0389 |
| 0.0604  | 0.0272 | 0.0198 | 0.0199 | 0.0213 | 0.022  | 0.0253 | 0.0203 | 0.0165 |
| 0.0065  | 0.0067 | 0.0075 | 0.0089 | 0.0074 | 0.0097 | 0.0104 | 0.009  | 0.0091 |
| 0       | 0      | 0      | 0      | 0      | 0      | 0      | 0      | 0      |
| 0       | 0      | 0      | 0      | 0      | 0      | 0      | 0      | 0      |
| 0       | 0.0011 | 0.0018 | 0.0024 | 0.0022 | 0.0026 | 0.0029 | 0.0025 | 0.0027 |
| 0.0075  | 0.0033 | 0.0022 | 0.0021 | 0.002  | 0.0024 | 0.0026 | 0.0021 | 0.0019 |
| 0.0068  | 0.0029 | 0.0023 | 0.002  | 0.0018 | 0.0023 | 0.0024 | 0.0023 | 0.0018 |
| -0.0001 | 0.0002 | 0.0003 | 0.0006 | 0.0006 | 0.0007 | 0.0009 | 0.0008 | 0.0008 |
| 0.0079  | 0.0046 | 0.0041 | 0.0045 | 0.0046 | 0.005  | 0.0055 | 0.005  | 0.0049 |
| 0.0527  | 0.0239 | 0.0202 | 0.0182 | 0.0185 | 0.0199 | 0.0191 | 0.018  | 0.017  |
| 0.0782  | 0.0387 | 0.0355 | 0.033  | 0.028  | 0.0322 | 0.0323 | 0.0225 | 0.0209 |
| 0.0808  | 0.0414 | 0.0365 | 0.0365 | 0.0357 | 0.0374 | 0.0395 | 0.0334 | 0.0311 |
| 0.2211  | 0.1132 | 0.0966 | 0.096  | 0.0897 | 0.0986 | 0.0912 | 0.0798 | 0.0663 |
| 0.0667  | 0.0326 | 0.0298 | 0.0338 | 0.0335 | 0.039  | 0.0408 | 0.037  | 0.0357 |
| 0       | 0      | 0      | 0      | 0      | 0      | 0      | 0      | 0      |
| 0.0039  | 0.0228 | 0.0326 | 0.0408 | 0.0362 | 0.0389 | 0.0418 | 0.0314 | 0.033  |
| 0.0253  | 0.051  | 0.0602 | 0.0785 | 0.0753 | 0.0842 | 0.1108 | 0.1064 | 0.1069 |
| -0.007  | 0.0472 | 0.0731 | 0.0913 | 0.0904 | 0.109  | 0.1186 | 0.0997 | 0.1064 |
| 0.0776  | 0.0912 | 0.1137 | 0.1337 | 0.1182 | 0.1401 | 0.1563 | 0.1279 | 0.123  |
| 0.1595  | 0.1008 | 0.1104 | 0.1446 | 0.1354 | 0.1607 | 0.1787 | 0.1406 | 0.1475 |

|         |        |        |        |        |        |        |        |        |
|---------|--------|--------|--------|--------|--------|--------|--------|--------|
| 0.1151  | 0.1289 | 0.1889 | 0.2072 | 0.1874 | 0.1971 | 0.2104 | 0.1793 | 0.1818 |
| 0.0861  | 0.1241 | 0.2165 | 0.2172 | 0.1863 | 0.1852 | 0.1773 | 0.1321 | 0.1341 |
| 0.0537  | 0.1036 | 0.1871 | 0.193  | 0.18   | 0.1694 | 0.17   | 0.1428 | 0.1346 |
| 0.022   | 0.0837 | 0.1632 | 0.1728 | 0.1542 | 0.1479 | 0.1537 | 0.1064 | 0.1066 |
| 0.3572  | 0.2356 | 0.3224 | 0.3109 | 0.2837 | 0.2793 | 0.2664 | 0.209  | 0.2047 |
| 0.024   | 0.0762 | 0.1523 | 0.1501 | 0.1355 | 0.1335 | 0.1355 | 0.1009 | 0.0891 |
| 0.0045  | 0.0617 | 0.0812 | 0.1066 | 0.1024 | 0.1229 | 0.1312 | 0.1204 | 0.1239 |
| 0.0944  | 0.087  | 0.1032 | 0.1593 | 0.1596 | 0.2002 | 0.2177 | 0.1813 | 0.1856 |
| -0.0226 | 0.032  | 0.0445 | 0.0806 | 0.0644 | 0.0856 | 0.1033 | 0.0849 | 0.0961 |
| -0.0006 | 0.0694 | 0.1033 | 0.1315 | 0.1269 | 0.1549 | 0.1769 | 0.1392 | 0.163  |
| 0.0259  | 0.0561 | 0.0593 | 0.0918 | 0.0918 | 0.1214 | 0.1418 | 0.1164 | 0.1373 |
| 0.0674  | 0.0988 | 0.1496 | 0.174  | 0.1569 | 0.175  | 0.1886 | 0.1587 | 0.1699 |
| 0.1241  | 0.1042 | 0.1398 | 0.1486 | 0.1385 | 0.1469 | 0.1514 | 0.1253 | 0.121  |
| 0.1044  | 0.1106 | 0.1726 | 0.1825 | 0.1645 | 0.1731 | 0.1772 | 0.1456 | 0.1416 |
| 0.1127  | 0.1457 | 0.2244 | 0.2271 | 0.2154 | 0.2123 | 0.2169 | 0.1733 | 0.1646 |
| 0.1546  | 0.1332 | 0.2069 | 0.2026 | 0.1852 | 0.1819 | 0.1831 | 0.1488 | 0.1339 |
| 0.3863  | 0.2409 | 0.2926 | 0.2848 | 0.2659 | 0.2535 | 0.2532 | 0.1995 | 0.1815 |
| 0.0516  | 0.12   | 0.2326 | 0.2213 | 0.2068 | 0.2087 | 0.2137 | 0.1724 | 0.1711 |
| 0.0537  | 0.1299 | 0.2414 | 0.2415 | 0.2182 | 0.2117 | 0.1958 | 0.1405 | 0.1455 |
| 0.3242  | 0.2141 | 0.2583 | 0.2445 | 0.2256 | 0.2231 | 0.2079 | 0.1637 | 0.1564 |
| 0.4686  | 0.2602 | 0.2653 | 0.2333 | 0.2632 | 0.2859 | 0.2674 | 0.2128 | 0.207  |
| 0.2768  | 0.1721 | 0.2259 | 0.2052 | 0.2014 | 0.2061 | 0.2079 | 0.1723 | 0.1602 |
| 0.3303  | 0.2172 | 0.2745 | 0.2524 | 0.2441 | 0.231  | 0.2396 | 0.1905 | 0.1824 |
| 0.1408  | 0.1434 | 0.204  | 0.2138 | 0.2018 | 0.2091 | 0.2153 | 0.1793 | 0.1666 |
| 0.0257  | 0.0844 | 0.1142 | 0.1514 | 0.138  | 0.1546 | 0.1572 | 0.1381 | 0.1318 |
| 0.0591  | 0.072  | 0.1126 | 0.1142 | 0.1033 | 0.1052 | 0.1089 | 0.0847 | 0.081  |
| 0.1271  | 0.0757 | 0.0895 | 0.0857 | 0.085  | 0.0798 | 0.0795 | 0.066  | 0.0594 |
| 0.0779  | 0.0703 | 0.0764 | 0.0971 | 0.0909 | 0.102  | 0.1213 | 0.1065 | 0.1093 |
| -0.0086 | 0.0504 | 0.0701 | 0.1303 | 0.1469 | 0.1762 | 0.1855 | 0.161  | 0.1719 |
| 0.0133  | 0.0167 | 0.02   | 0.0261 | 0.0259 | 0.0304 | 0.038  | 0.0337 | 0.0347 |
| 0.0444  | 0.0154 | 0.0123 | 0.0104 | 0.0092 | 0.0116 | 0.0091 | 0.0074 | 0.0088 |
| 0.0026  | 0.0095 | 0.0184 | 0.0196 | 0.0176 | 0.0184 | 0.0185 | 0.0154 | 0.015  |
| 0       | 0      | 0      | 0      | 0      | 0      | 0      | 0      | 0      |
| 0       | 0      | 0      | 0      | 0      | 0      | 0      | 0      | 0      |
| 0.0073  | 0.0032 | 0.003  | 0.0027 | 0.0023 | 0.0025 | 0.0025 | 0.0023 | 0.0019 |
| 0.0156  | 0.0061 | 0.0048 | 0.0029 | 0.0029 | 0.0032 | 0.0037 | 0.0031 | 0.0033 |
| 0       | 0      | 0      | 0      | 0      | 0      | 0      | 0      | 0      |
| 0       | 0      | 0      | 0      | 0      | 0      | 0      | 0      | 0      |
| 0       | 0      | 0      | 0      | 0      | 0      | 0      | 0      | 0      |
| 0.0006  | 0.0012 | 0.0024 | 0.0024 | 0.0021 | 0.002  | 0.0019 | 0.0014 | 0.0015 |
| 0.0004  | 0.0017 | 0.0032 | 0.0033 | 0.0029 | 0.0026 | 0.0024 | 0.0017 | 0.0017 |
| 0.0011  | 0.0027 | 0.0052 | 0.0054 | 0.005  | 0.0047 | 0.0048 | 0.0038 | 0.0038 |
| 0.0011  | 0.005  | 0.0063 | 0.0103 | 0.0088 | 0.0106 | 0.0124 | 0.0105 | 0.0109 |
| 0       | 0.0026 | 0.0043 | 0.0056 | 0.0051 | 0.0058 | 0.0069 | 0.0059 | 0.0062 |





|         |        |        |        |        |        |        |        |        |
|---------|--------|--------|--------|--------|--------|--------|--------|--------|
| 0       | 0      | 0      | 0      | 0      | 0      | 0      | 0      | 0      |
| 0       | 0      | 0      | 0      | 0      | 0      | 0      | 0      | 0      |
| -0.0002 | 0.0005 | 0.0011 | 0.0014 | 0.0012 | 0.0015 | 0.0018 | 0.0015 | 0.0017 |
| 0       | 0.0006 | 0.0013 | 0.0015 | 0.0014 | 0.0017 | 0.0018 | 0.0015 | 0.0015 |
| 0.0075  | 0.0039 | 0.0036 | 0.0035 | 0.0034 | 0.0036 | 0.0038 | 0.0034 | 0.0034 |
| -0.0001 | 0.0002 | 0.0002 | 0.0004 | 0.0004 | 0.0005 | 0.0007 | 0.0006 | 0.0007 |
| 0.0001  | 0.0004 | 0.0005 | 0.0008 | 0.0007 | 0.0008 | 0.0009 | 0.0009 | 0.001  |
| 0.0224  | 0.0102 | 0.0082 | 0.0069 | 0.0069 | 0.007  | 0.0064 | 0.0072 | 0.0065 |
| 0.033   | 0.0137 | 0.0098 | 0.0097 | 0.0103 | 0.0132 | 0.0118 | 0.0086 | 0.0096 |
| 0.0161  | 0.0072 | 0.0056 | 0.0048 | 0.0041 | 0.005  | 0.0043 | 0.0035 | 0.0034 |
| 0.0808  | 0.0277 | 0.0225 | 0.0234 | 0.0263 | 0.025  | 0.0221 | 0.0215 | 0.0207 |
| -0.0019 | 0.0044 | 0.0049 | 0.01   | 0.0082 | 0.0112 | 0.0141 | 0.0125 | 0.0123 |
| 0.0002  | 0.0024 | 0.0019 | 0.0038 | 0.0038 | 0.0047 | 0.0048 | 0.0049 | 0.0048 |
| 0.1698  | 0.0973 | 0.0939 | 0.0786 | 0.0761 | 0.0883 | 0.081  | 0.0683 | 0.0631 |
| 0.3489  | 0.1824 | 0.1866 | 0.191  | 0.1778 | 0.1904 | 0.18   | 0.1448 | 0.1276 |
| 0.2466  | 0.1182 | 0.1185 | 0.1107 | 0.0945 | 0.1154 | 0.124  | 0.1031 | 0.0899 |
| 0.1155  | 0.0707 | 0.0613 | 0.0645 | 0.059  | 0.0679 | 0.0673 | 0.0591 | 0.0591 |
| 0.0159  | 0.0334 | 0.0519 | 0.0701 | 0.0629 | 0.0749 | 0.0814 | 0.072  | 0.0747 |
| 0.1184  | 0.1081 | 0.1258 | 0.1552 | 0.1375 | 0.1702 | 0.1884 | 0.1539 | 0.1545 |
| 0.0715  | 0.0938 | 0.1344 | 0.1543 | 0.1304 | 0.1427 | 0.164  | 0.1323 | 0.1344 |
| 0.0785  | 0.0915 | 0.1393 | 0.1459 | 0.1319 | 0.1307 | 0.137  | 0.1076 | 0.1025 |
| 0.6074  | 0.282  | 0.2772 | 0.238  | 0.2489 | 0.2332 | 0.2318 | 0.2188 | 0.1894 |
| 0.9425  | 0.3957 | 0.3263 | 0.2923 | 0.3063 | 0.3181 | 0.3745 | 0.3416 | 0.315  |
| 0.4986  | 0.2492 | 0.2664 | 0.2415 | 0.2246 | 0.2555 | 0.2585 | 0.2051 | 0.1958 |
| 0.3996  | 0.2532 | 0.2929 | 0.2674 | 0.2499 | 0.2546 | 0.2361 | 0.1959 | 0.193  |
| 0.5826  | 0.2837 | 0.2515 | 0.2361 | 0.2087 | 0.2229 | 0.2355 | 0.2124 | 0.2182 |
| 1.2472  | 0.5434 | 0.4625 | 0.4472 | 0.4649 | 0.4463 | 0.441  | 0.3509 | 0.3801 |
| 0.8707  | 0.4305 | 0.3682 | 0.3354 | 0.2934 | 0.322  | 0.2946 | 0.2515 | 0.2274 |
| 0.2371  | 0.1899 | 0.2619 | 0.2435 | 0.2292 | 0.2284 | 0.2204 | 0.169  | 0.1544 |
| 0.5869  | 0.2924 | 0.2394 | 0.2194 | 0.2277 | 0.2294 | 0.2369 | 0.2059 | 0.1675 |
| 1.3776  | 0.6259 | 0.5156 | 0.4291 | 0.464  | 0.4621 | 0.4742 | 0.3906 | 0.3202 |
| 1.0522  | 0.3811 | 0.3214 | 0.2366 | 0.2509 | 0.3133 | 0.2995 | 0.2933 | 0.2808 |
| 0.6214  | 0.2995 | 0.3224 | 0.3062 | 0.2922 | 0.2706 | 0.2389 | 0.1865 | 0.1617 |
| 0.943   | 0.4288 | 0.4035 | 0.3328 | 0.3048 | 0.3282 | 0.3367 | 0.2879 | 0.3058 |
| 0.8886  | 0.4263 | 0.3535 | 0.3148 | 0.2951 | 0.3275 | 0.325  | 0.2487 | 0.2179 |
| 1.1757  | 0.5259 | 0.4643 | 0.4029 | 0.3662 | 0.4191 | 0.4139 | 0.3728 | 0.3866 |
| 1.2832  | 0.5762 | 0.4599 | 0.3737 | 0.4654 | 0.4785 | 0.4699 | 0.3861 | 0.3715 |
| 1.1076  | 0.5102 | 0.449  | 0.3742 | 0.3356 | 0.3227 | 0.3195 | 0.3214 | 0.2833 |
| 1.3821  | 0.5295 | 0.4378 | 0.4052 | 0.4329 | 0.4428 | 0.4195 | 0.298  | 0.2613 |
| 0.7638  | 0.3649 | 0.3405 | 0.3043 | 0.2625 | 0.2602 | 0.2614 | 0.2235 | 0.2124 |
| 0.1392  | 0.1204 | 0.1629 | 0.1652 | 0.1521 | 0.1492 | 0.1532 | 0.1203 | 0.1103 |
| 0.0117  | 0.0419 | 0.0529 | 0.0629 | 0.0568 | 0.0639 | 0.0643 | 0.0554 | 0.0585 |
| 0.0259  | 0.0288 | 0.0252 | 0.036  | 0.0302 | 0.0462 | 0.0523 | 0.0464 | 0.0529 |
| 0.0336  | 0.0442 | 0.057  | 0.0914 | 0.0917 | 0.1195 | 0.1542 | 0.1339 | 0.1451 |

|        |        |        |        |        |        |        |        |        |
|--------|--------|--------|--------|--------|--------|--------|--------|--------|
| 0.0375 | 0.0636 | 0.0761 | 0.1022 | 0.09   | 0.1051 | 0.1224 | 0.1146 | 0.1252 |
| 0.0003 | 0.0014 | 0.0023 | 0.003  | 0.0028 | 0.0035 | 0.0038 | 0.0032 | 0.0033 |
| 0.0536 | 0.0203 | 0.0152 | 0.0169 | 0.0183 | 0.0225 | 0.0228 | 0.02   | 0.0201 |
| 0.228  | 0.121  | 0.1091 | 0.1206 | 0.1083 | 0.1176 | 0.1326 | 0.1125 | 0.1095 |
| 0.2317 | 0.1128 | 0.0842 | 0.0761 | 0.0809 | 0.0905 | 0.0961 | 0.0811 | 0.068  |
| 0.016  | 0.0122 | 0.0148 | 0.0166 | 0.0159 | 0.0171 | 0.018  | 0.0148 | 0.0148 |
| 0      | 0      | 0      | 0      | 0      | 0      | 0      | 0      | 0      |
| 0      | 0      | 0      | 0      | 0      | 0      | 0      | 0      | 0      |
| 0.0003 | 0.001  | 0.0018 | 0.0019 | 0.0017 | 0.0017 | 0.0018 | 0.0015 | 0.0014 |
| 0.0005 | 0.0013 | 0.0018 | 0.0021 | 0.002  | 0.0021 | 0.002  | 0.0017 | 0.0016 |
| 0.0073 | 0.0035 | 0.0035 | 0.0034 | 0.0032 | 0.0036 | 0.0035 | 0.0028 | 0.0029 |
| 0.0001 | 0.0008 | 0.0012 | 0.0014 | 0.0013 | 0.0014 | 0.0016 | 0.0011 | 0.0011 |
| 0.0081 | 0.0042 | 0.0037 | 0.0034 | 0.0036 | 0.0038 | 0.0036 | 0.0031 | 0.0032 |
| 0.0302 | 0.0129 | 0.0087 | 0.0097 | 0.0113 | 0.0118 | 0.0113 | 0.0095 | 0.008  |
| 0.028  | 0.0111 | 0.0085 | 0.0082 | 0.0087 | 0.0099 | 0.0082 | 0.0066 | 0.0057 |
| 0.0139 | 0.0056 | 0.0048 | 0.0051 | 0.005  | 0.0052 | 0.0046 | 0.0037 | 0.003  |
| 0.0012 | 0.0111 | 0.0207 | 0.0236 | 0.0218 | 0.0235 | 0.0252 | 0.0198 | 0.0203 |
| 0      | 0      | 0      | 0      | 0      | 0      | 0      | 0      | 0      |
| 0.0295 | 0.0148 | 0.0119 | 0.0116 | 0.0123 | 0.0144 | 0.0147 | 0.0125 | 0.0128 |
| 0.1734 | 0.0766 | 0.0692 | 0.0638 | 0.0606 | 0.0677 | 0.0716 | 0.0651 | 0.0638 |
| 0.1952 | 0.1071 | 0.1038 | 0.1024 | 0.1002 | 0.1034 | 0.0989 | 0.0883 | 0.0796 |
| 0.0882 | 0.0646 | 0.073  | 0.0854 | 0.0814 | 0.0932 | 0.0989 | 0.088  | 0.0862 |
| 0.1053 | 0.0757 | 0.0796 | 0.0894 | 0.0819 | 0.0908 | 0.1007 | 0.0862 | 0.0835 |
| 0.1788 | 0.1097 | 0.1183 | 0.124  | 0.1197 | 0.1341 | 0.1431 | 0.1246 | 0.1166 |
| 0.0599 | 0.1159 | 0.1737 | 0.1921 | 0.1717 | 0.1792 | 0.1957 | 0.1641 | 0.1564 |
| 0.0639 | 0.0874 | 0.0955 | 0.1291 | 0.1117 | 0.1335 | 0.1545 | 0.1372 | 0.1414 |
| 0.0394 | 0.1026 | 0.1693 | 0.2096 | 0.1781 | 0.1833 | 0.2058 | 0.1736 | 0.1544 |
| 0.1789 | 0.1104 | 0.1266 | 0.1269 | 0.1193 | 0.1314 | 0.1335 | 0.113  | 0.1098 |
| 1.0118 | 0.4257 | 0.3291 | 0.3008 | 0.2902 | 0.2579 | 0.2138 | 0.1925 | 0.2002 |
| 0.5137 | 0.3127 | 0.3827 | 0.3612 | 0.3339 | 0.3548 | 0.3497 | 0.2815 | 0.2701 |
| 0.3258 | 0.2044 | 0.2507 | 0.2511 | 0.2357 | 0.2298 | 0.2474 | 0.2139 | 0.1943 |
| 0.6131 | 0.2665 | 0.2222 | 0.175  | 0.1668 | 0.1867 | 0.1857 | 0.1433 | 0.1243 |
| 0.6973 | 0.3247 | 0.2744 | 0.2167 | 0.216  | 0.1985 | 0.2119 | 0.1789 | 0.194  |
| 0.3549 | 0.2129 | 0.255  | 0.2322 | 0.2204 | 0.2243 | 0.2149 | 0.1654 | 0.1456 |
| 0.2031 | 0.1667 | 0.2349 | 0.2294 | 0.2063 | 0.199  | 0.2053 | 0.166  | 0.1498 |
| 0.2374 | 0.14   | 0.1734 | 0.1721 | 0.1586 | 0.1662 | 0.1749 | 0.1456 | 0.1311 |
| 0.3762 | 0.1846 | 0.1898 | 0.1659 | 0.1583 | 0.1623 | 0.1695 | 0.1341 | 0.1261 |
| 0.6184 | 0.292  | 0.2913 | 0.2432 | 0.1983 | 0.2051 | 0.1956 | 0.1646 | 0.1506 |
| 0.9243 | 0.4228 | 0.3401 | 0.3203 | 0.2943 | 0.2989 | 0.3024 | 0.2725 | 0.2561 |
| 0.9435 | 0.3155 | 0.2667 | 0.2547 | 0.2713 | 0.2758 | 0.2717 | 0.2274 | 0.2155 |
| 0.7776 | 0.3585 | 0.3209 | 0.2844 | 0.2844 | 0.2766 | 0.2476 | 0.2034 | 0.1896 |
| 0.8423 | 0.4176 | 0.369  | 0.3231 | 0.3531 | 0.3487 | 0.3185 | 0.2383 | 0.2096 |
| 0.8996 | 0.329  | 0.2133 | 0.1885 | 0.1603 | 0.1984 | 0.1819 | 0.1978 | 0.1465 |
| 1.3007 | 0.5699 | 0.475  | 0.3523 | 0.3923 | 0.4365 | 0.401  | 0.3934 | 0.3093 |

|          |         |         |         |         |         |         |         |         |
|----------|---------|---------|---------|---------|---------|---------|---------|---------|
| 1. 4182  | 0. 6373 | 0. 4826 | 0. 5328 | 0. 4926 | 0. 5309 | 0. 5534 | 0. 5409 | 0. 5019 |
| 0. 4075  | 0. 2341 | 0. 2632 | 0. 2445 | 0. 2372 | 0. 2444 | 0. 2446 | 0. 1974 | 0. 1691 |
| 0. 044   | 0. 0612 | 0. 0907 | 0. 1023 | 0. 0951 | 0. 1053 | 0. 1144 | 0. 0876 | 0. 0835 |
| 0. 0991  | 0. 0807 | 0. 0698 | 0. 0924 | 0. 0881 | 0. 1069 | 0. 1204 | 0. 1048 | 0. 1027 |
| -0. 0401 | 0. 023  | 0. 038  | 0. 0946 | 0. 0738 | 0. 1031 | 0. 1505 | 0. 147  | 0. 1571 |
| 0. 0778  | 0. 1005 | 0. 1042 | 0. 1465 | 0. 1341 | 0. 1423 | 0. 1631 | 0. 1546 | 0. 1598 |
| 0. 0465  | 0. 0309 | 0. 0301 | 0. 0367 | 0. 0331 | 0. 0376 | 0. 0416 | 0. 0393 | 0. 0421 |
| 0. 001   | 0. 0024 | 0. 0048 | 0. 0048 | 0. 0045 | 0. 0042 | 0. 0041 | 0. 0032 | 0. 0031 |
| 0. 0463  | 0. 0264 | 0. 0286 | 0. 0276 | 0. 0269 | 0. 0287 | 0. 0305 | 0. 0254 | 0. 0255 |
| 0. 2133  | 0. 0832 | 0. 0549 | 0. 0519 | 0. 0604 | 0. 0679 | 0. 069  | 0. 0598 | 0. 0612 |
| 0. 1733  | 0. 0369 | 0. 0193 | 0. 0182 | 0. 0219 | 0. 0418 | 0. 039  | 0. 036  | 0. 0334 |
| 0. 0015  | 0. 004  | 0. 0073 | 0. 008  | 0. 0069 | 0. 0062 | 0. 0059 | 0. 0047 | 0. 0042 |
| 0        | 0       | 0       | 0       | 0       | 0       | 0       | 0       | 0       |
| 0        | 0       | 0       | 0       | 0       | 0       | 0       | 0       | 0       |
| 0. 0001  | 0. 0006 | 0. 0011 | 0. 0011 | 0. 0011 | 0. 0011 | 0. 001  | 0. 0008 | 0. 0007 |
| 0. 0001  | 0. 0005 | 0. 001  | 0. 001  | 0. 0009 | 0. 0009 | 0. 0009 | 0. 0007 | 0. 0006 |
| 0. 0003  | 0. 0007 | 0. 0012 | 0. 0013 | 0. 0012 | 0. 0011 | 0. 0011 | 0. 0008 | 0. 0008 |
| 0. 0001  | 0. 0005 | 0. 0011 | 0. 0011 | 0. 001  | 0. 0009 | 0. 0009 | 0. 0007 | 0. 0007 |
| 0        | 0       | 0       | 0       | 0       | 0       | 0       | 0       | 0       |
| 0        | 0       | 0       | 0       | 0       | 0       | 0       | 0       | 0       |
| 0        | 0       | 0       | 0       | 0       | 0       | 0       | 0       | 0       |
| 0        | 0       | 0       | 0       | 0       | 0       | 0       | 0       | 0       |
| 0. 0001  | 0. 0004 | 0. 0004 | 0. 0007 | 0. 0006 | 0. 0007 | 0. 0008 | 0. 0007 | 0. 0008 |
| 0. 0289  | 0. 0111 | 0. 0068 | 0. 0047 | 0. 0052 | 0. 0066 | 0. 0065 | 0. 0048 | 0. 0036 |
| 0. 0248  | 0. 0179 | 0. 0221 | 0. 0218 | 0. 0203 | 0. 0211 | 0. 0215 | 0. 018  | 0. 017  |
| 0. 0007  | 0. 0073 | 0. 0151 | 0. 016  | 0. 0144 | 0. 015  | 0. 0156 | 0. 0131 | 0. 0117 |
| 0. 0001  | 0. 0177 | 0. 0249 | 0. 0443 | 0. 04   | 0. 0527 | 0. 0627 | 0. 0553 | 0. 0612 |
| 0. 0428  | 0. 069  | 0. 0945 | 0. 1152 | 0. 0975 | 0. 1114 | 0. 1265 | 0. 112  | 0. 1167 |
| 0. 0549  | 0. 0551 | 0. 076  | 0. 0827 | 0. 0776 | 0. 0822 | 0. 0848 | 0. 0717 | 0. 0692 |
| 0. 014   | 0. 039  | 0. 0604 | 0. 0721 | 0. 0688 | 0. 0737 | 0. 0797 | 0. 0706 | 0. 067  |
| 0. 0005  | 0. 0101 | 0. 0181 | 0. 0228 | 0. 0224 | 0. 0236 | 0. 0278 | 0. 0226 | 0. 0226 |
| 0. 0622  | 0. 0707 | 0. 1001 | 0. 1109 | 0. 105  | 0. 1141 | 0. 1206 | 0. 0997 | 0. 0917 |
| 0. 0146  | 0. 0483 | 0. 0752 | 0. 1022 | 0. 1074 | 0. 1219 | 0. 1444 | 0. 1311 | 0. 1404 |
| 0. 1227  | 0. 1105 | 0. 1473 | 0. 169  | 0. 1537 | 0. 1729 | 0. 1838 | 0. 1605 | 0. 1614 |
| 0. 1278  | 0. 0946 | 0. 1309 | 0. 1287 | 0. 1201 | 0. 1232 | 0. 1253 | 0. 0996 | 0. 0946 |
| 1. 0609  | 0. 4478 | 0. 3866 | 0. 3239 | 0. 3149 | 0. 2844 | 0. 2375 | 0. 2194 | 0. 2478 |
| 0. 717   | 0. 3924 | 0. 4159 | 0. 4022 | 0. 3637 | 0. 3989 | 0. 3944 | 0. 331  | 0. 3102 |
| 0. 3398  | 0. 2384 | 0. 299  | 0. 2885 | 0. 2889 | 0. 2762 | 0. 2795 | 0. 2248 | 0. 2154 |
| 0. 4638  | 0. 262  | 0. 3002 | 0. 2736 | 0. 2683 | 0. 2706 | 0. 3003 | 0. 2371 | 0. 2118 |
| 0. 2324  | 0. 2084 | 0. 3076 | 0. 3102 | 0. 289  | 0. 2737 | 0. 2673 | 0. 2127 | 0. 1867 |
| 0. 3261  | 0. 236  | 0. 2986 | 0. 2913 | 0. 2776 | 0. 2739 | 0. 2743 | 0. 2161 | 0. 1927 |
| 0. 709   | 0. 3879 | 0. 3971 | 0. 3523 | 0. 3405 | 0. 3644 | 0. 3332 | 0. 2708 | 0. 2412 |
| 0. 5702  | 0. 2898 | 0. 3171 | 0. 3152 | 0. 3367 | 0. 3542 | 0. 3757 | 0. 3177 | 0. 2652 |
| 0. 5174  | 0. 2988 | 0. 3143 | 0. 297  | 0. 2851 | 0. 2825 | 0. 2749 | 0. 2249 | 0. 2093 |

|         |        |        |        |        |        |        |        |        |
|---------|--------|--------|--------|--------|--------|--------|--------|--------|
| 0.8055  | 0.4259 | 0.3964 | 0.3432 | 0.349  | 0.3733 | 0.3277 | 0.2888 | 0.2386 |
| 1.1731  | 0.5377 | 0.4377 | 0.3299 | 0.3172 | 0.3611 | 0.3244 | 0.2455 | 0.2105 |
| 0.7616  | 0.3903 | 0.3568 | 0.2835 | 0.2634 | 0.2707 | 0.2553 | 0.1715 | 0.1421 |
| 0.6424  | 0.3468 | 0.3572 | 0.3441 | 0.3342 | 0.3432 | 0.3428 | 0.2667 | 0.2317 |
| 0.6943  | 0.3731 | 0.3201 | 0.2941 | 0.2843 | 0.3405 | 0.3505 | 0.2969 | 0.2838 |
| 0.6314  | 0.2919 | 0.2497 | 0.2401 | 0.2679 | 0.3079 | 0.2726 | 0.2182 | 0.2254 |
| 0.3631  | 0.215  | 0.2516 | 0.2514 | 0.2334 | 0.2512 | 0.2536 | 0.221  | 0.218  |
| -0.0022 | 0.0536 | 0.0839 | 0.1114 | 0.0959 | 0.1082 | 0.1369 | 0.1151 | 0.1064 |
| 0.1756  | 0.0977 | 0.0846 | 0.0974 | 0.0981 | 0.1183 | 0.1273 | 0.1166 | 0.1157 |
| 0.2427  | 0.122  | 0.1006 | 0.1074 | 0.1024 | 0.1154 | 0.1164 | 0.1054 | 0.1001 |
| 0.048   | 0.0396 | 0.0419 | 0.0513 | 0.0468 | 0.0554 | 0.0602 | 0.0528 | 0.0555 |
| 0.004   | 0.0144 | 0.0222 | 0.0258 | 0.025  | 0.0253 | 0.0262 | 0.0224 | 0.022  |
| 0       | 0      | 0      | 0      | 0      | 0      | 0      | 0      | 0      |
| 0.0255  | 0.0443 | 0.0737 | 0.0778 | 0.0738 | 0.0735 | 0.0764 | 0.0649 | 0.0632 |
| 0.0416  | 0.0498 | 0.087  | 0.0854 | 0.0765 | 0.0779 | 0.0796 | 0.0642 | 0.0606 |
| 0.0665  | 0.0304 | 0.0273 | 0.0271 | 0.0257 | 0.0263 | 0.0243 | 0.0201 | 0.0171 |
| 0.0551  | 0.0306 | 0.0309 | 0.0294 | 0.0324 | 0.0346 | 0.033  | 0.0251 | 0.0236 |
| -0.0004 | 0.0014 | 0.001  | 0.0031 | 0.0028 | 0.0035 | 0.0041 | 0.0043 | 0.0048 |
| 0       | 0      | 0      | 0      | 0      | 0      | 0      | 0      | 0      |
| 0       | 0      | 0      | 0      | 0      | 0      | 0      | 0      | 0      |
| 0       | 0      | 0      | 0      | 0      | 0      | 0      | 0      | 0      |
| 0       | 0      | 0      | 0      | 0      | 0      | 0      | 0      | 0      |
| 0       | 0      | 0      | 0      | 0      | 0      | 0      | 0      | 0      |
| 0       | 0      | 0      | 0      | 0      | 0      | 0      | 0      | 0      |
| 0       | 0      | 0      | 0      | 0      | 0      | 0      | 0      | 0      |
| 0       | 0      | 0      | 0      | 0      | 0      | 0      | 0      | 0      |
| 0       | 0      | 0      | 0      | 0      | 0      | 0      | 0      | 0      |
| 0       | 0      | 0      | 0      | 0      | 0      | 0      | 0      | 0      |
| 0       | 0      | 0      | 0      | 0      | 0      | 0      | 0      | 0      |
| 0.0005  | 0.0013 | 0.0018 | 0.0019 | 0.0018 | 0.002  | 0.0022 | 0.0017 | 0.0017 |
| 0.0003  | 0.0015 | 0.0026 | 0.0029 | 0.0024 | 0.0024 | 0.0023 | 0.0018 | 0.0019 |
| 0.001   | 0.0032 | 0.0058 | 0.0067 | 0.0055 | 0.0055 | 0.0054 | 0.0044 | 0.0042 |
| 0       | 0.0027 | 0.0059 | 0.0069 | 0.0062 | 0.0064 | 0.0067 | 0.0054 | 0.0053 |
| 0       | 0.0039 | 0.0084 | 0.0098 | 0.0088 | 0.0091 | 0.0105 | 0.0079 | 0.0079 |
| 0.0018  | 0.0061 | 0.0094 | 0.0117 | 0.0102 | 0.0096 | 0.01   | 0.0075 | 0.0081 |
| 0.0015  | 0.0056 | 0.0088 | 0.0099 | 0.0086 | 0.0103 | 0.0112 | 0.0089 | 0.008  |
| -0.0005 | 0.004  | 0.0071 | 0.0092 | 0.0077 | 0.009  | 0.0097 | 0.0089 | 0.0088 |
| 0.0149  | 0.0083 | 0.0076 | 0.008  | 0.0072 | 0.0085 | 0.0094 | 0.0088 | 0.0087 |
| 0.0631  | 0.0802 | 0.1142 | 0.1213 | 0.1064 | 0.1062 | 0.1086 | 0.0912 | 0.0878 |
| 0.1018  | 0.1087 | 0.1518 | 0.1731 | 0.1566 | 0.1709 | 0.1824 | 0.1522 | 0.1478 |
| 0.0379  | 0.0952 | 0.1689 | 0.1815 | 0.1651 | 0.1703 | 0.1801 | 0.1428 | 0.1448 |
| 0.0314  | 0.0843 | 0.1532 | 0.1697 | 0.1555 | 0.1634 | 0.1619 | 0.1279 | 0.1321 |
| 0.3048  | 0.1699 | 0.1597 | 0.1616 | 0.1589 | 0.1646 | 0.1695 | 0.1447 | 0.1385 |
| 0.6069  | 0.3086 | 0.294  | 0.29   | 0.2905 | 0.3307 | 0.3164 | 0.2633 | 0.243  |
| 0.6244  | 0.3238 | 0.3094 | 0.2926 | 0.2794 | 0.2734 | 0.27   | 0.2173 | 0.2145 |



|         |        |        |        |        |        |        |        |        |
|---------|--------|--------|--------|--------|--------|--------|--------|--------|
| 1.0408  | 0.4779 | 0.4121 | 0.4109 | 0.4164 | 0.3917 | 0.4092 | 0.4195 | 0.4033 |
| 0.4687  | 0.2832 | 0.3049 | 0.2823 | 0.2735 | 0.2728 | 0.2635 | 0.2055 | 0.1812 |
| 0.3392  | 0.1634 | 0.1874 | 0.1665 | 0.1773 | 0.1957 | 0.1826 | 0.166  | 0.1414 |
| 0.8545  | 0.3809 | 0.302  | 0.2542 | 0.2287 | 0.2667 | 0.2487 | 0.1933 | 0.1727 |
| 0.6469  | 0.2946 | 0.2618 | 0.2364 | 0.2161 | 0.2242 | 0.2448 | 0.1998 | 0.1948 |
| 0.1092  | 0.1301 | 0.204  | 0.2162 | 0.1954 | 0.1915 | 0.2067 | 0.1695 | 0.1541 |
| 0.1817  | 0.1399 | 0.1805 | 0.1821 | 0.1642 | 0.1644 | 0.1666 | 0.1381 | 0.1298 |
| 0.5206  | 0.2379 | 0.2081 | 0.2004 | 0.2083 | 0.2396 | 0.2389 | 0.219  | 0.1892 |
| 0.5991  | 0.3216 | 0.3137 | 0.2874 | 0.273  | 0.2893 | 0.2802 | 0.235  | 0.2408 |
| 0.0836  | 0.1094 | 0.1628 | 0.1771 | 0.1549 | 0.1628 | 0.1733 | 0.1409 | 0.1323 |
| 0.0198  | 0.0861 | 0.1496 | 0.1683 | 0.1489 | 0.1596 | 0.1762 | 0.1457 | 0.1537 |
| 0.1141  | 0.1479 | 0.2014 | 0.2269 | 0.2101 | 0.2205 | 0.2328 | 0.1988 | 0.1948 |
| 0.0524  | 0.0944 | 0.1226 | 0.1485 | 0.1339 | 0.1481 | 0.1487 | 0.1247 | 0.1255 |
| 0.0069  | 0.0234 | 0.0297 | 0.0438 | 0.0429 | 0.0486 | 0.0526 | 0.0449 | 0.0442 |
| 0.3346  | 0.1342 | 0.1115 | 0.1119 | 0.0992 | 0.121  | 0.135  | 0.1153 | 0.1025 |
| 0.4751  | 0.1836 | 0.1182 | 0.1103 | 0.1129 | 0.1053 | 0.1105 | 0.1102 | 0.1036 |
| 0.1409  | 0.0547 | 0.0374 | 0.0248 | 0.0356 | 0.046  | 0.0347 | 0.0291 | 0.0229 |
| 0.0143  | 0.0059 | 0.0049 | 0.0052 | 0.0053 | 0.0052 | 0.0053 | 0.0048 | 0.0044 |
| 0.0036  | 0.0097 | 0.0159 | 0.0165 | 0.0154 | 0.0148 | 0.0153 | 0.0108 | 0.0111 |
| 0.0288  | 0.0326 | 0.0529 | 0.0517 | 0.0487 | 0.0482 | 0.0464 | 0.0361 | 0.0327 |
| 0.0126  | 0.022  | 0.0414 | 0.042  | 0.0364 | 0.0364 | 0.0363 | 0.0294 | 0.0291 |
| 0.0014  | 0.0076 | 0.0147 | 0.0148 | 0.0139 | 0.0143 | 0.0157 | 0.0122 | 0.0107 |
| 0       | 0.0007 | 0.0013 | 0.0016 | 0.0014 | 0.0015 | 0.0016 | 0.0014 | 0.0015 |
| 0       | 0      | 0      | 0      | 0      | 0      | 0      | 0      | 0      |
| 0       | 0      | 0      | 0      | 0      | 0      | 0      | 0      | 0      |
| 0       | 0      | 0      | 0      | 0      | 0      | 0      | 0      | 0      |
| 0       | 0      | 0      | 0      | 0      | 0      | 0      | 0      | 0      |
| 0       | 0      | 0      | 0      | 0      | 0      | 0      | 0      | 0      |
| 0       | 0      | 0      | 0      | 0      | 0      | 0      | 0      | 0      |
| 0       | 0      | 0      | 0      | 0      | 0      | 0      | 0      | 0      |
| 0       | 0      | 0      | 0      | 0      | 0      | 0      | 0      | 0      |
| 0       | 0      | 0      | 0      | 0      | 0      | 0      | 0      | 0      |
| 0       | 0      | 0      | 0      | 0      | 0      | 0      | 0      | 0      |
| 0       | 0      | 0      | 0      | 0      | 0      | 0      | 0      | 0      |
| 0       | 0      | 0      | 0      | 0      | 0      | 0      | 0      | 0      |
| 0       | 0      | 0      | 0      | 0      | 0      | 0      | 0      | 0      |
| 0       | 0      | 0      | 0      | 0      | 0      | 0      | 0      | 0      |
| 0       | 0      | 0      | 0      | 0      | 0      | 0      | 0      | 0      |
| 0.0005  | 0.0018 | 0.0029 | 0.0031 | 0.0027 | 0.003  | 0.0032 | 0.0028 | 0.0028 |
| 0.0004  | 0.0024 | 0.0044 | 0.005  | 0.0046 | 0.0049 | 0.0052 | 0.0042 | 0.0039 |
| 0.0009  | 0.0029 | 0.0053 | 0.0058 | 0.0053 | 0.0054 | 0.0057 | 0.0043 | 0.0041 |
| -0.0002 | 0.002  | 0.0039 | 0.0045 | 0.0041 | 0.0045 | 0.0051 | 0.0041 | 0.004  |
| 0.0005  | 0.0026 | 0.0039 | 0.0052 | 0.0052 | 0.0056 | 0.0065 | 0.0052 | 0.0046 |
| 0       | 0.0021 | 0.0033 | 0.0045 | 0.0041 | 0.0044 | 0.0048 | 0.0039 | 0.0039 |
| -0.0022 | 0.0073 | 0.0138 | 0.0172 | 0.0155 | 0.0158 | 0.0188 | 0.0136 | 0.014  |
| 0.0255  | 0.058  | 0.0748 | 0.0943 | 0.0862 | 0.0969 | 0.1133 | 0.1009 | 0.1007 |

|         |        |        |        |        |        |        |        |        |
|---------|--------|--------|--------|--------|--------|--------|--------|--------|
| 0.0368  | 0.0496 | 0.0628 | 0.0896 | 0.0775 | 0.0961 | 0.1104 | 0.0946 | 0.1071 |
| 0.019   | 0.0761 | 0.1136 | 0.1498 | 0.1242 | 0.1317 | 0.146  | 0.1246 | 0.125  |
| -0.0031 | 0.0724 | 0.1245 | 0.1501 | 0.1463 | 0.1722 | 0.1831 | 0.1515 | 0.1594 |
| 0.0786  | 0.0846 | 0.1202 | 0.1365 | 0.1293 | 0.1424 | 0.1538 | 0.1259 | 0.1307 |
| 0.0532  | 0.0794 | 0.1037 | 0.1307 | 0.128  | 0.1504 | 0.1626 | 0.1369 | 0.1302 |
| 0.0107  | 0.0634 | 0.1027 | 0.1209 | 0.1042 | 0.1194 | 0.132  | 0.1113 | 0.1109 |
| 0.0196  | 0.0752 | 0.11   | 0.1358 | 0.1169 | 0.1185 | 0.1285 | 0.1211 | 0.1191 |
| 0.0477  | 0.1075 | 0.1928 | 0.1951 | 0.1756 | 0.1847 | 0.1884 | 0.1516 | 0.1497 |
| 0.0464  | 0.11   | 0.1897 | 0.2077 | 0.1879 | 0.1975 | 0.1943 | 0.1552 | 0.1659 |
| 0.0363  | 0.0737 | 0.1333 | 0.1582 | 0.1433 | 0.1524 | 0.1636 | 0.1415 | 0.1364 |
| 0.0596  | 0.0896 | 0.1283 | 0.1511 | 0.1354 | 0.1348 | 0.1348 | 0.1198 | 0.1071 |
| 0.021   | 0.0833 | 0.1476 | 0.1608 | 0.1463 | 0.15   | 0.1622 | 0.139  | 0.1364 |
| 0.0508  | 0.0881 | 0.1482 | 0.1692 | 0.1456 | 0.1548 | 0.1591 | 0.1308 | 0.1188 |
| 0.2297  | 0.1709 | 0.217  | 0.2234 | 0.2086 | 0.2219 | 0.2298 | 0.192  | 0.1865 |
| -0.0127 | 0.0678 | 0.1124 | 0.1554 | 0.1359 | 0.1589 | 0.1804 | 0.1566 | 0.1543 |
| 0.0007  | 0.0496 | 0.0859 | 0.1152 | 0.0947 | 0.1226 | 0.1335 | 0.1031 | 0.1106 |
| 0.2014  | 0.1399 | 0.1331 | 0.1588 | 0.1588 | 0.1927 | 0.2214 | 0.186  | 0.1856 |
| 0.1754  | 0.1483 | 0.1425 | 0.1762 | 0.1603 | 0.1837 | 0.2012 | 0.1802 | 0.1793 |
| 0.0296  | 0.0357 | 0.0488 | 0.0581 | 0.0523 | 0.0592 | 0.0666 | 0.061  | 0.059  |
| 0.0221  | 0.0575 | 0.0913 | 0.117  | 0.1017 | 0.1121 | 0.1261 | 0.1155 | 0.1153 |
| 0.0036  | 0.0693 | 0.0947 | 0.121  | 0.1159 | 0.1209 | 0.1299 | 0.1009 | 0.1182 |
| 0.5081  | 0.2497 | 0.2124 | 0.1783 | 0.1702 | 0.1605 | 0.1647 | 0.1577 | 0.1567 |
| 0.2048  | 0.087  | 0.083  | 0.0813 | 0.0859 | 0.0883 | 0.0889 | 0.0697 | 0.0638 |
| 0.0724  | 0.0354 | 0.0319 | 0.0266 | 0.0274 | 0.0262 | 0.0261 | 0.0226 | 0.0228 |
| 0       | 0      | 0      | 0      | 0      | 0      | 0      | 0      | 0      |
| 0.0024  | 0.0053 | 0.0102 | 0.0103 | 0.0088 | 0.0085 | 0.0089 | 0.0068 | 0.0068 |
| 0.0012  | 0.0039 | 0.0068 | 0.0068 | 0.0059 | 0.0055 | 0.0062 | 0.0047 | 0.0044 |
| 0       | 0.0004 | 0.0003 | 0.0005 | 0.0004 | 0.0005 | 0.0007 | 0.0006 | 0.0006 |
| 0.0139  | 0.0059 | 0.0046 | 0.005  | 0.0043 | 0.005  | 0.0042 | 0.0029 | 0.0024 |
| 0.0315  | 0.0152 | 0.0132 | 0.0117 | 0.0117 | 0.012  | 0.0109 | 0.0094 | 0.007  |
| 0       | 0      | 0      | 0      | 0      | 0      | 0      | 0      | 0      |
| 0       | 0      | 0      | 0      | 0      | 0      | 0      | 0      | 0      |
| 0       | 0      | 0      | 0      | 0      | 0      | 0      | 0      | 0      |
| 0       | 0      | 0      | 0      | 0      | 0      | 0      | 0      | 0      |
| 0       | 0      | 0      | 0      | 0      | 0      | 0      | 0      | 0      |
| 0       | 0      | 0      | 0      | 0      | 0      | 0      | 0      | 0      |
| 0       | 0      | 0      | 0      | 0      | 0      | 0      | 0      | 0      |
| 0       | 0      | 0      | 0      | 0      | 0      | 0      | 0      | 0      |
| 0       | 0      | 0      | 0      | 0      | 0      | 0      | 0      | 0      |
| 0       | 0      | 0      | 0      | 0      | 0      | 0      | 0      | 0      |
| 0       | 0      | 0      | 0      | 0      | 0      | 0      | 0      | 0      |
| 0       | 0      | 0      | 0      | 0      | 0      | 0      | 0      | 0      |
| 0       | 0      | 0      | 0      | 0      | 0      | 0      | 0      | 0      |
| 0.0001  | 0.0004 | 0.0011 | 0.0011 | 0.0009 | 0.0009 | 0.001  | 0.0008 | 0.0008 |





|        |        |        |        |        |        |        |        |        |   |
|--------|--------|--------|--------|--------|--------|--------|--------|--------|---|
| 0      | 0      | 0      | 0      | 0      | 0      | 0      | 0      | 0      | 0 |
| 0      | 0      | 0      | 0      | 0      | 0      | 0      | 0      | 0      | 0 |
| 0      | 0      | 0      | 0      | 0      | 0      | 0      | 0      | 0      | 0 |
| 0      | 0      | 0      | 0      | 0      | 0      | 0      | 0      | 0      | 0 |
| 0      | 0      | 0      | 0      | 0      | 0      | 0      | 0      | 0      | 0 |
| 0      | 0      | 0      | 0      | 0      | 0      | 0      | 0      | 0      | 0 |
| 0      | 0      | 0      | 0      | 0      | 0      | 0      | 0      | 0      | 0 |
| 0      | 0      | 0      | 0      | 0      | 0      | 0      | 0      | 0      | 0 |
| 0.0003 | 0.0017 | 0.0025 | 0.0031 | 0.0027 | 0.003  | 0.0034 | 0.003  | 0.0029 |   |
| 0.0002 | 0.0014 | 0.0019 | 0.0024 | 0.0022 | 0.0024 | 0.0028 | 0.0023 | 0.0026 |   |
| 0.0001 | 0.0012 | 0.002  | 0.0024 | 0.0021 | 0.0024 | 0.0025 | 0.0019 | 0.0021 |   |
| 0.0002 | 0.0009 | 0.0016 | 0.0018 | 0.0016 | 0.0017 | 0.0018 | 0.0015 | 0.0014 |   |
| 0      | 0      | 0      | 0      | 0      | 0      | 0      | 0      | 0      |   |
| 0      | 0      | 0      | 0      | 0      | 0      | 0      | 0      | 0      |   |
| 0.0003 | 0.0007 | 0.0012 | 0.0012 | 0.0011 | 0.0011 | 0.0011 | 0.0009 | 0.0009 |   |
| 0.0003 | 0.0007 | 0.0012 | 0.0012 | 0.001  | 0.001  | 0.001  | 0.0008 | 0.0008 |   |
| 0.0088 | 0.0062 | 0.0079 | 0.0073 | 0.0067 | 0.0069 | 0.0066 | 0.0053 | 0.0049 |   |
| 0.0751 | 0.0455 | 0.048  | 0.0506 | 0.0476 | 0.0547 | 0.0559 | 0.049  | 0.0471 |   |
| 0.0646 | 0.0642 | 0.0825 | 0.0933 | 0.0853 | 0.0979 | 0.1066 | 0.0888 | 0.0875 |   |
| 0.0883 | 0.0691 | 0.0928 | 0.0924 | 0.0864 | 0.0857 | 0.0842 | 0.0702 | 0.0642 |   |
| 0.1891 | 0.0866 | 0.0837 | 0.0721 | 0.0677 | 0.0782 | 0.0826 | 0.0738 | 0.0823 |   |
| 0.2607 | 0.1367 | 0.1223 | 0.1133 | 0.1095 | 0.1203 | 0.1212 | 0.0914 | 0.0867 |   |
| 0.4646 | 0.2273 | 0.2241 | 0.2145 | 0.1992 | 0.2057 | 0.2109 | 0.1711 | 0.1567 |   |
| 0.6961 | 0.3216 | 0.2226 | 0.2025 | 0.2017 | 0.255  | 0.2431 | 0.2166 | 0.2244 |   |
| 0.4875 | 0.1826 | 0.1367 | 0.1428 | 0.1519 | 0.1507 | 0.1492 | 0.1229 | 0.0925 |   |
| 0.0012 | 0.0042 | 0.0092 | 0.0092 | 0.0079 | 0.0072 | 0.0071 | 0.0053 | 0.0056 |   |
| 0.181  | 0.0769 | 0.0632 | 0.0516 | 0.0541 | 0.0629 | 0.0532 | 0.0454 | 0.0401 |   |
| 0.3205 | 0.149  | 0.1217 | 0.1241 | 0.1283 | 0.1412 | 0.1465 | 0.1261 | 0.1209 |   |
| 0.1713 | 0.0949 | 0.0975 | 0.1045 | 0.1003 | 0.1158 | 0.1254 | 0.1003 | 0.0938 |   |
| 0.3638 | 0.1663 | 0.1539 | 0.1484 | 0.1317 | 0.146  | 0.1498 | 0.1189 | 0.113  |   |
| 0.3276 | 0.1644 | 0.1687 | 0.1504 | 0.1452 | 0.1575 | 0.1556 | 0.1291 | 0.1117 |   |
| 0.3283 | 0.1745 | 0.1531 | 0.1496 | 0.1526 | 0.1734 | 0.18   | 0.1635 | 0.1434 |   |
| 0.5249 | 0.247  | 0.2201 | 0.2053 | 0.1745 | 0.2053 | 0.1995 | 0.1872 | 0.1655 |   |
| 0.1485 | 0.1022 | 0.0915 | 0.1154 | 0.114  | 0.1346 | 0.1464 | 0.1302 | 0.1357 |   |
| 0.2264 | 0.119  | 0.0976 | 0.1083 | 0.1158 | 0.126  | 0.1273 | 0.1074 | 0.1039 |   |
| 0.5574 | 0.2602 | 0.2383 | 0.2394 | 0.2321 | 0.2455 | 0.2389 | 0.1765 | 0.1681 |   |
| 0.1627 | 0.1306 | 0.1621 | 0.1799 | 0.1709 | 0.1861 | 0.1974 | 0.1579 | 0.1575 |   |
| 0.5296 | 0.205  | 0.2104 | 0.2057 | 0.2212 | 0.2178 | 0.2144 | 0.212  | 0.1953 |   |
| 0.4276 | 0.1831 | 0.1393 | 0.1055 | 0.0893 | 0.0824 | 0.0874 | 0.066  | 0.0628 |   |
| 0.5679 | 0.2798 | 0.2394 | 0.2359 | 0.2089 | 0.2269 | 0.2467 | 0.2166 | 0.2156 |   |
| 0.0026 | 0.0091 | 0.0181 | 0.0205 | 0.0186 | 0.0197 | 0.0213 | 0.0164 | 0.0161 |   |
| 0.0001 | 0.0024 | 0.0031 | 0.0044 | 0.0044 | 0.0052 | 0.006  | 0.0052 | 0.0052 |   |
| 0      | 0.0004 | 0.0004 | 0.0007 | 0.0007 | 0.0008 | 0.0009 | 0.0009 | 0.0009 |   |
| 0.0239 | 0.0106 | 0.0092 | 0.0082 | 0.0089 | 0.009  | 0.0085 | 0.0082 | 0.0074 |   |

|         |        |        |        |        |        |        |        |        |
|---------|--------|--------|--------|--------|--------|--------|--------|--------|
| 0.0152  | 0.0073 | 0.0059 | 0.0056 | 0.0055 | 0.0065 | 0.0062 | 0.0053 | 0.0044 |
| 0.014   | 0.0052 | 0.004  | 0.0026 | 0.0023 | 0.0022 | 0.0019 | 0.001  | 0.0005 |
| 0.0075  | 0.0033 | 0.0027 | 0.0026 | 0.0024 | 0.0025 | 0.0027 | 0.0022 | 0.002  |
| -0.0002 | 0.0001 | 0.0003 | 0.0006 | 0.0004 | 0.0006 | 0.0008 | 0.0006 | 0.0007 |
| 0       | 0      | 0      | 0      | 0      | 0      | 0      | 0      | 0      |
| 0       | 0      | 0      | 0      | 0      | 0      | 0      | 0      | 0      |
| 0       | 0      | 0      | 0      | 0      | 0      | 0      | 0      | 0      |
| 0       | 0      | 0      | 0      | 0      | 0      | 0      | 0      | 0      |
| 0       | 0      | 0      | 0      | 0      | 0      | 0      | 0      | 0      |
| 0       | 0      | 0      | 0      | 0      | 0      | 0      | 0      | 0      |
| 0       | 0      | 0      | 0      | 0      | 0      | 0      | 0      | 0      |
| 0       | 0      | 0      | 0      | 0      | 0      | 0      | 0      | 0      |
| 0       | 0      | 0      | 0      | 0      | 0      | 0      | 0      | 0      |
| 0       | 0      | 0      | 0      | 0      | 0      | 0      | 0      | 0      |
| 0.0014  | 0.0035 | 0.0054 | 0.0062 | 0.0058 | 0.0064 | 0.0072 | 0.0064 | 0.0061 |
| 0.0002  | 0.0026 | 0.0048 | 0.0053 | 0.0046 | 0.005  | 0.0052 | 0.0043 | 0.0043 |
| 0       | 0.0016 | 0.0031 | 0.0037 | 0.0034 | 0.0037 | 0.0041 | 0.0033 | 0.0033 |
| -0.0003 | 0.0009 | 0.0015 | 0.0022 | 0.002  | 0.0023 | 0.0026 | 0.0022 | 0.002  |
| 0.0001  | 0.0005 | 0.0006 | 0.0009 | 0.0009 | 0.0011 | 0.0011 | 0.0011 | 0.001  |
| 0       | 0.0007 | 0.0013 | 0.0015 | 0.0014 | 0.0015 | 0.0017 | 0.0013 | 0.0013 |
| 0.0002  | 0.0007 | 0.0012 | 0.0012 | 0.001  | 0.0009 | 0.001  | 0.0008 | 0.0007 |
| 0.0005  | 0.0012 | 0.0023 | 0.0022 | 0.002  | 0.002  | 0.0019 | 0.0015 | 0.0014 |
| 0.0027  | 0.0079 | 0.0119 | 0.0131 | 0.0124 | 0.0129 | 0.0136 | 0.0117 | 0.012  |
| 0       | 0      | 0      | 0      | 0      | 0      | 0      | 0      | 0      |
| 0.0032  | 0.0307 | 0.0723 | 0.0748 | 0.0654 | 0.0637 | 0.0663 | 0.05   | 0.0488 |
| 0.0943  | 0.0801 | 0.1082 | 0.1093 | 0.1017 | 0.1033 | 0.1057 | 0.0842 | 0.0815 |
| 0.1739  | 0.0917 | 0.081  | 0.0738 | 0.069  | 0.066  | 0.0659 | 0.0536 | 0.0416 |
| 0.0945  | 0.0773 | 0.1087 | 0.104  | 0.0979 | 0.0998 | 0.1035 | 0.0826 | 0.0813 |
| 0.0563  | 0.0779 | 0.1234 | 0.1199 | 0.1101 | 0.1049 | 0.1019 | 0.078  | 0.0704 |
| 0.0741  | 0.0371 | 0.0373 | 0.0388 | 0.0345 | 0.0372 | 0.0365 | 0.0287 | 0.0273 |
| 0.0697  | 0.0326 | 0.0329 | 0.032  | 0.0308 | 0.0343 | 0.0347 | 0.0277 | 0.0291 |
| -0.0001 | 0.0003 | 0.0004 | 0.0007 | 0.0006 | 0.0007 | 0.0008 | 0.0008 | 0.0009 |
| 0.0692  | 0.0244 | 0.0123 | 0.0108 | 0.0119 | 0.0171 | 0.0187 | 0.0163 | 0.0164 |
| 0.0028  | 0.009  | 0.0141 | 0.0172 | 0.015  | 0.0169 | 0.0188 | 0.0155 | 0.0157 |
| -0.0009 | 0.016  | 0.0289 | 0.0412 | 0.0384 | 0.0417 | 0.0461 | 0.0415 | 0.0444 |
| 0.1614  | 0.063  | 0.0588 | 0.068  | 0.0658 | 0.0736 | 0.0691 | 0.0499 | 0.046  |
| 0.0548  | 0.0241 | 0.0203 | 0.0189 | 0.0163 | 0.0214 | 0.0241 | 0.0213 | 0.0199 |
| 0.0218  | 0.0302 | 0.0384 | 0.0487 | 0.0437 | 0.0551 | 0.0607 | 0.0505 | 0.0497 |
| 0.0347  | 0.0451 | 0.0609 | 0.0746 | 0.07   | 0.0828 | 0.0888 | 0.0724 | 0.0696 |
| 0.0397  | 0.0317 | 0.0386 | 0.0448 | 0.0413 | 0.046  | 0.0498 | 0.0417 | 0.0416 |
| -0.0077 | 0.0101 | 0.0098 | 0.0206 | 0.0174 | 0.03   | 0.0436 | 0.0357 | 0.0349 |
| 0.3552  | 0.1347 | 0.1071 | 0.1214 | 0.1321 | 0.1641 | 0.1518 | 0.1311 | 0.1082 |
| 0.2238  | 0.0764 | 0.0559 | 0.056  | 0.055  | 0.0724 | 0.0794 | 0.079  | 0.063  |
| 0.1592  | 0.0636 | 0.0466 | 0.0358 | 0.0403 | 0.052  | 0.0493 | 0.0452 | 0.0444 |

|        |        |        |        |        |        |        |        |        |
|--------|--------|--------|--------|--------|--------|--------|--------|--------|
| 0.007  | 0.0188 | 0.0351 | 0.036  | 0.03   | 0.03   | 0.0305 | 0.0227 | 0.0227 |
| 0.0526 | 0.0259 | 0.0246 | 0.0241 | 0.0222 | 0.0234 | 0.0231 | 0.019  | 0.0155 |
| 0.0608 | 0.0304 | 0.0303 | 0.0316 | 0.0287 | 0.0332 | 0.0338 | 0.0285 | 0.0263 |
| 0.015  | 0.0077 | 0.0064 | 0.0058 | 0.0055 | 0.0061 | 0.0073 | 0.0065 | 0.0065 |
| 0      | 0      | 0      | 0      | 0      | 0      | 0      | 0      | 0      |
| 0      | 0      | 0      | 0      | 0      | 0      | 0      | 0      | 0      |
| 0      | 0      | 0      | 0      | 0      | 0      | 0      | 0      | 0      |
| 0.0001 | 0.0003 | 0.0005 | 0.0008 | 0.0006 | 0.0007 | 0.0008 | 0.0007 | 0.0008 |
| 0.0225 | 0.0107 | 0.0095 | 0.0089 | 0.0076 | 0.0083 | 0.01   | 0.0091 | 0.009  |
| 0      | 0      | 0      | 0      | 0      | 0      | 0      | 0      | 0      |
| 0      | 0      | 0      | 0      | 0      | 0      | 0      | 0      | 0      |
| 0      | 0      | 0      | 0      | 0      | 0      | 0      | 0      | 0      |
| 0      | 0      | 0      | 0      | 0      | 0      | 0      | 0      | 0      |
| 0      | 0      | 0      | 0      | 0      | 0      | 0      | 0      | 0      |
| 0      | 0      | 0      | 0      | 0      | 0      | 0      | 0      | 0      |
| 0      | 0      | 0      | 0      | 0      | 0      | 0      | 0      | 0      |
| 0      | 0      | 0      | 0      | 0      | 0      | 0      | 0      | 0      |
| 0      | 0      | 0      | 0      | 0      | 0      | 0      | 0      | 0      |
| 0      | 0      | 0      | 0      | 0      | 0      | 0      | 0      | 0      |
| 0      | 0      | 0      | 0      | 0      | 0      | 0      | 0      | 0      |
| 0.0013 | 0.0027 | 0.0046 | 0.0049 | 0.0043 | 0.0041 | 0.0043 | 0.0035 | 0.0031 |
| 0.0006 | 0.0015 | 0.0027 | 0.0029 | 0.0026 | 0.0027 | 0.003  | 0.0024 | 0.0026 |
| 0.0001 | 0.0009 | 0.0016 | 0.0018 | 0.0016 | 0.0016 | 0.0017 | 0.0015 | 0.0015 |
| 0      | 0.0004 | 0.0005 | 0.0006 | 0.0007 | 0.0008 | 0.0008 | 0.0008 | 0.0008 |
| 0.0002 | 0.0006 | 0.0006 | 0.0008 | 0.0007 | 0.0008 | 0.001  | 0.0009 | 0.0008 |
| 0      | 0      | 0      | 0      | 0      | 0      | 0      | 0      | 0      |
| 0      | 0      | 0      | 0      | 0      | 0      | 0      | 0      | 0      |
| 0.0001 | 0.0005 | 0.0011 | 0.0012 | 0.001  | 0.0009 | 0.0009 | 0.0008 | 0.0007 |
| 0      | 0      | 0      | 0      | 0      | 0      | 0      | 0      | 0      |
| 0.0002 | 0.0026 | 0.0035 | 0.0063 | 0.0055 | 0.0065 | 0.0074 | 0.0066 | 0.0064 |
| 0.0634 | 0.0345 | 0.0368 | 0.0331 | 0.0296 | 0.032  | 0.0319 | 0.0259 | 0.0229 |
| 0.0862 | 0.0333 | 0.0231 | 0.0226 | 0.0253 | 0.0279 | 0.028  | 0.0218 | 0.0199 |
| 0      | 0.0004 | 0.0005 | 0.0007 | 0.0006 | 0.0006 | 0.0008 | 0.0007 | 0.0008 |
| 0.0042 | 0.0167 | 0.0359 | 0.0383 | 0.0335 | 0.0306 | 0.0313 | 0.0236 | 0.0248 |
| 0.0023 | 0.0054 | 0.009  | 0.0096 | 0.0089 | 0.0088 | 0.0091 | 0.0074 | 0.007  |
| 0.0297 | 0.0125 | 0.0095 | 0.0084 | 0.0088 | 0.0101 | 0.0096 | 0.0083 | 0.0078 |
| 0.0303 | 0.0135 | 0.0111 | 0.009  | 0.0093 | 0.0099 | 0.0105 | 0.0086 | 0.0068 |
| 0.0319 | 0.0238 | 0.0295 | 0.0318 | 0.0293 | 0.0317 | 0.0338 | 0.0276 | 0.0272 |
| 0.011  | 0.0153 | 0.0226 | 0.0253 | 0.0221 | 0.0234 | 0.0243 | 0.0196 | 0.0182 |
| 0.0072 | 0.0026 | 0.002  | 0.0019 | 0.0019 | 0.0024 | 0.0026 | 0.0023 | 0.002  |
| 0.0372 | 0.0179 | 0.014  | 0.0129 | 0.0127 | 0.0156 | 0.0161 | 0.0161 | 0.0144 |
| 0.0026 | 0.0107 | 0.0198 | 0.0212 | 0.0198 | 0.0209 | 0.0225 | 0.019  | 0.0183 |
| 0.0004 | 0.0046 | 0.0102 | 0.0094 | 0.0083 | 0.0089 | 0.008  | 0.0058 | 0.0047 |
| 0.0143 | 0.0063 | 0.0047 | 0.0039 | 0.0037 | 0.0037 | 0.0037 | 0.0032 | 0.0036 |













|        |        |        |        |        |        |        |        |        |        |
|--------|--------|--------|--------|--------|--------|--------|--------|--------|--------|
| 0      | 0      | 0      | 0      | 0      | 0      | 0      | 0      | 0      | 0      |
| 0      | 0      | 0      | 0      | 0      | 0      | 0      | 0      | 0      | 0      |
| 0      | 0      | 0      | 0      | 0      | 0      | 0      | 0      | 0      | 0      |
| 0      | 0      | 0      | 0      | 0      | 0      | 0      | 0      | 0      | 0      |
| 0      | 0      | 0      | 0      | 0      | 0      | 0      | 0      | 0      | 0      |
| 0      | 0      | 0      | 0      | 0      | 0      | 0      | 0      | 0      | 0      |
| 0      | 0      | 0      | 0      | 0      | 0      | 0      | 0      | 0      | 0      |
| 0      | 0      | 0      | 0      | 0      | 0      | 0      | 0      | 0      | 0      |
| 0      | 0      | 0      | 0      | 0      | 0      | 0      | 0      | 0      | 0      |
| 0      | 0      | 0      | 0      | 0      | 0      | 0      | 0      | 0      | 0      |
| 0      | 0      | 0      | 0      | 0      | 0      | 0      | 0      | 0      | 0      |
| 0      | 0      | 0      | 0      | 0      | 0      | 0      | 0      | 0      | 0      |
| 0      | 0      | 0      | 0      | 0      | 0      | 0      | 0      | 0      | 0      |
| 0      | 0      | 0      | 0      | 0      | 0      | 0      | 0      | 0      | 0      |
| 0      | 0      | 0      | 0      | 0      | 0      | 0      | 0      | 0      | 0      |
| 0      | 0      | 0      | 0      | 0      | 0      | 0      | 0      | 0      | 0      |
| 0      | 0      | 0      | 0      | 0      | 0      | 0      | 0      | 0      | 0      |
| 0      | 0      | 0      | 0      | 0      | 0      | 0      | 0      | 0      | 0      |
| 0      | 0      | 0      | 0      | 0      | 0      | 0      | 0      | 0      | 0      |
| 0      | 0      | 0      | 0      | 0      | 0      | 0      | 0      | 0      | 0      |
| 0.0023 | 0.0023 | 0.0023 | 0.0021 | 0.0021 | 0.0019 | 0.0022 | 0.0024 | 0.0021 | 0.0021 |
| 0      | 0      | 0      | 0      | 0      | 0      | 0      | 0      | 0      | 0      |
| 0.0028 | 0.0029 | 0.0027 | 0.003  | 0.0028 | 0.0031 | 0.0032 | 0.004  | 0.003  | 0.003  |
| 0.0016 | 0.0016 | 0.0014 | 0.0014 | 0.0014 | 0.0015 | 0.0016 | 0.0023 | 0.0018 | 0.0018 |
| 0.0014 | 0.0012 | 0.0013 | 0.0012 | 0.0012 | 0.0012 | 0.0013 | 0.0013 | 0.0012 | 0.0012 |
| 0.0042 | 0.0073 | 0.0057 | 0.0088 | 0.0077 | 0.0081 | 0.0087 | 0.0111 | 0.0115 | 0.0115 |
| 0.0173 | 0.0172 | 0.0152 | 0.0151 | 0.0115 | 0.011  | 0.0138 | 0.0181 | 0.0149 | 0.0149 |
| 0.0044 | 0.0059 | 0.0054 | 0.0062 | 0.0057 | 0.0051 | 0.0048 | 0.0059 | 0.0063 | 0.0063 |
| 0.0017 | 0.0018 | 0.0018 | 0.0018 | 0.0018 | 0.002  | 0.0019 | 0.0024 | 0.0017 | 0.0017 |
| 0.0032 | 0.0036 | 0.0038 | 0.0038 | 0.0039 | 0.0039 | 0.0039 | 0.0048 | 0.0037 | 0.0037 |
| 0.0042 | 0.0042 | 0.0042 | 0.0042 | 0.0042 | 0.0039 | 0.004  | 0.0053 | 0.0035 | 0.0035 |
| 0.0025 | 0.0025 | 0.0025 | 0.0023 | 0.0024 | 0.0025 | 0.0026 | 0.003  | 0.0024 | 0.0024 |
| 0.0047 | 0.0051 | 0.005  | 0.0051 | 0.0046 | 0.0052 | 0.0053 | 0.0064 | 0.0052 | 0.0052 |
| 0      | 0      | 0      | 0      | 0      | 0      | 0      | 0      | 0      | 0      |
| 0.0008 | 0.0007 | 0.0006 | 0.0006 | 0.0005 | 0.0005 | 0.0005 | 0.0005 | 0.0004 | 0.0004 |
| 0.0117 | 0.0118 | 0.0123 | 0.0128 | 0.0128 | 0.0136 | 0.0143 | 0.016  | 0.012  | 0.012  |
| 0.0015 | 0.0017 | 0.0016 | 0.0017 | 0.0017 | 0.0018 | 0.0019 | 0.002  | 0.0016 | 0.0016 |
| 0.0013 | 0.0013 | 0.0013 | 0.0011 | 0.0012 | 0.0011 | 0.0011 | 0.0012 | 0.0012 | 0.0012 |
| 0.0024 | 0.0023 | 0.0023 | 0.0025 | 0.0025 | 0.0027 | 0.0028 | 0.0033 | 0.0027 | 0.0027 |
| 0.0007 | 0.0008 | 0.0008 | 0.001  | 0.001  | 0.0011 | 0.001  | 0.0013 | 0.001  | 0.001  |
| 0      | 0      | 0      | 0      | 0      | 0      | 0      | 0      | 0      | 0      |
| 0.0039 | 0.004  | 0.0039 | 0.0036 | 0.0033 | 0.0033 | 0.0035 | 0.004  | 0.004  | 0.004  |

|        |        |        |        |        |        |        |        |        |
|--------|--------|--------|--------|--------|--------|--------|--------|--------|
| 0.0058 | 0.0059 | 0.0059 | 0.0061 | 0.0058 | 0.0059 | 0.006  | 0.0064 | 0.0057 |
| 0.001  | 0.0011 | 0.0011 | 0.001  | 0.001  | 0.0012 | 0.001  | 0.0013 | 0.0009 |
| 0      | 0      | 0      | 0      | 0      | 0      | 0      | 0      | 0      |
| 0      | 0      | 0      | 0      | 0      | 0      | 0      | 0      | 0      |
| 0      | 0      | 0      | 0      | 0      | 0      | 0      | 0      | 0      |
| 0      | 0      | 0      | 0      | 0      | 0      | 0      | 0      | 0      |
| 0      | 0      | 0      | 0      | 0      | 0      | 0      | 0      | 0      |
| 0      | 0      | 0      | 0      | 0      | 0      | 0      | 0      | 0      |
| 0      | 0      | 0      | 0      | 0      | 0      | 0      | 0      | 0      |
| 0      | 0      | 0      | 0      | 0      | 0      | 0      | 0      | 0      |
| 0      | 0      | 0      | 0      | 0      | 0      | 0      | 0      | 0      |
| 0      | 0      | 0      | 0      | 0      | 0      | 0      | 0      | 0      |
| 0      | 0      | 0      | 0      | 0      | 0      | 0      | 0      | 0      |
| 0      | 0      | 0      | 0      | 0      | 0      | 0      | 0      | 0      |
| 0      | 0      | 0      | 0      | 0      | 0      | 0      | 0      | 0      |
| 0      | 0      | 0      | 0      | 0      | 0      | 0      | 0      | 0      |
| 0      | 0      | 0      | 0      | 0      | 0      | 0      | 0      | 0      |
| 0      | 0      | 0      | 0      | 0      | 0      | 0      | 0      | 0      |
| 0      | 0      | 0      | 0      | 0      | 0      | 0      | 0      | 0      |
| 0      | 0      | 0      | 0      | 0      | 0      | 0      | 0      | 0      |
| 0      | 0      | 0      | 0      | 0      | 0      | 0      | 0      | 0      |
| 0      | 0      | 0      | 0      | 0      | 0      | 0      | 0      | 0      |
| 0      | 0      | 0      | 0      | 0      | 0      | 0      | 0      | 0      |
| 0      | 0      | 0      | 0      | 0      | 0      | 0      | 0      | 0      |
| 0      | 0      | 0      | 0      | 0      | 0      | 0      | 0      | 0      |
| 0      | 0      | 0      | 0      | 0      | 0      | 0      | 0      | 0      |
| 0      | 0      | 0      | 0      | 0      | 0      | 0      | 0      | 0      |
| 0      | 0      | 0      | 0      | 0      | 0      | 0      | 0      | 0      |
| 0      | 0      | 0      | 0      | 0      | 0      | 0      | 0      | 0      |
| 0      | 0      | 0      | 0      | 0      | 0      | 0      | 0      | 0      |
| 0      | 0      | 0      | 0      | 0      | 0      | 0      | 0      | 0      |
| 0      | 0      | 0      | 0      | 0      | 0      | 0      | 0      | 0      |
| 0      | 0      | 0      | 0      | 0      | 0      | 0      | 0      | 0      |
| 0      | 0      | 0      | 0      | 0      | 0      | 0      | 0      | 0      |
| 0      | 0      | 0      | 0      | 0      | 0      | 0      | 0      | 0      |
| 0      | 0      | 0      | 0      | 0      | 0      | 0      | 0      | 0      |
| 0.0082 | 0.0096 | 0.0093 | 0.0081 | 0.0076 | 0.0066 | 0.0067 | 0.0055 | 0.0053 |
| 0.006  | 0.0062 | 0.006  | 0.0073 | 0.0064 | 0.008  | 0.007  | 0.0083 | 0.0071 |
| 0.0113 | 0.0118 | 0.0114 | 0.0112 | 0.0104 | 0.01   | 0.0088 | 0.0117 | 0.012  |
| 0.0059 | 0.0065 | 0.0066 | 0.0076 | 0.0074 | 0.0082 | 0.0076 | 0.0096 | 0.0076 |
| 0.0008 | 0.0008 | 0.0008 | 0.0008 | 0.0007 | 0.0006 | 0.0006 | 0.0007 | 0.0007 |
| 0.0065 | 0.0072 | 0.0076 | 0.0076 | 0.0079 | 0.0081 | 0.0085 | 0.0101 | 0.0078 |
| 0.0135 | 0.0142 | 0.0152 | 0.0157 | 0.0143 | 0.0149 | 0.015  | 0.0185 | 0.0145 |
| 0      | 0      | 0      | 0      | 0      | 0      | 0      | 0      | 0      |
| 0      | 0      | 0      | 0      | 0      | 0      | 0      | 0      | 0      |
| 0.0062 | 0.0071 | 0.0066 | 0.0071 | 0.0055 | 0.0066 | 0.0074 | 0.007  | 0.0061 |
| 0.0013 | 0.0013 | 0.0012 | 0.0014 | 0.0012 | 0.0018 | 0.0022 | 0.0026 | 0.0022 |
| 0.0025 | 0.0025 | 0.0026 | 0.0025 | 0.0026 | 0.0028 | 0.003  | 0.0036 | 0.0028 |
| 0.0118 | 0.0128 | 0.0126 | 0.0145 | 0.0137 | 0.0141 | 0.0148 | 0.0163 | 0.0141 |
| 0.0042 | 0.0046 | 0.0045 | 0.0054 | 0.005  | 0.0054 | 0.006  | 0.0072 | 0.007  |
| 0.0008 | 0.0008 | 0.0008 | 0.0008 | 0.0007 | 0.0007 | 0.0007 | 0.0007 | 0.0006 |
| 0.0144 | 0.0151 | 0.0153 | 0.0157 | 0.0163 | 0.0183 | 0.019  | 0.023  | 0.0172 |















|        |        |        |        |        |        |        |        |        |   |
|--------|--------|--------|--------|--------|--------|--------|--------|--------|---|
| 0      | 0      | 0      | 0      | 0      | 0      | 0      | 0      | 0      | 0 |
| 0      | 0      | 0      | 0      | 0      | 0      | 0      | 0      | 0      | 0 |
| 0      | 0      | 0      | 0      | 0      | 0      | 0      | 0      | 0      | 0 |
| 0      | 0      | 0      | 0      | 0      | 0      | 0      | 0      | 0      | 0 |
| 0      | 0      | 0      | 0      | 0      | 0      | 0      | 0      | 0      | 0 |
| 0      | 0      | 0      | 0      | 0      | 0      | 0      | 0      | 0      | 0 |
| 0      | 0      | 0      | 0      | 0      | 0      | 0      | 0      | 0      | 0 |
| 0      | 0      | 0      | 0      | 0      | 0      | 0      | 0      | 0      | 0 |
| 0      | 0      | 0      | 0      | 0      | 0      | 0      | 0      | 0      | 0 |
| 0      | 0      | 0      | 0      | 0      | 0      | 0      | 0      | 0      | 0 |
| 0.0068 | 0.0069 | 0.0071 | 0.0069 | 0.008  | 0.0082 | 0.0076 | 0.0078 | 0.0074 |   |
| 0.0035 | 0.0037 | 0.0036 | 0.0034 | 0.0035 | 0.0035 | 0.0038 | 0.0051 | 0.0036 |   |
| 0.0133 | 0.0134 | 0.0129 | 0.0121 | 0.0105 | 0.0101 | 0.0099 | 0.0101 | 0.0098 |   |
| 0.0121 | 0.0127 | 0.0126 | 0.0113 | 0.0117 | 0.0113 | 0.0111 | 0.0099 | 0.0088 |   |
| 0.0089 | 0.0096 | 0.0087 | 0.0098 | 0.0082 | 0.0088 | 0.0084 | 0.0093 | 0.0084 |   |
| 0.0094 | 0.0097 | 0.0094 | 0.012  | 0.0106 | 0.0101 | 0.011  | 0.0124 | 0.0127 |   |
| 0.0074 | 0.007  | 0.0065 | 0.0064 | 0.0061 | 0.006  | 0.0063 | 0.0064 | 0.0057 |   |
| 0      | 0      | 0      | 0      | 0      | 0      | 0      | 0      | 0      |   |
| 0.0059 | 0.0068 | 0.0069 | 0.0071 | 0.0068 | 0.0071 | 0.0083 | 0.0105 | 0.0082 |   |
| 0.052  | 0.0539 | 0.0537 | 0.0521 | 0.0481 | 0.0492 | 0.0493 | 0.0564 | 0.0506 |   |
| 0.0519 | 0.0545 | 0.0545 | 0.0624 | 0.0605 | 0.0673 | 0.0688 | 0.088  | 0.075  |   |
| 0.0647 | 0.069  | 0.0638 | 0.0664 | 0.0629 | 0.0688 | 0.0675 | 0.0795 | 0.0766 |   |
| 0.1147 | 0.1217 | 0.12   | 0.1195 | 0.1156 | 0.1255 | 0.131  | 0.1439 | 0.1216 |   |
| 0.1411 | 0.139  | 0.1528 | 0.1494 | 0.1438 | 0.1442 | 0.1491 | 0.172  | 0.1321 |   |
| 0.144  | 0.158  | 0.1649 | 0.1577 | 0.1614 | 0.1742 | 0.1829 | 0.212  | 0.1796 |   |
| 0.1676 | 0.1788 | 0.1587 | 0.139  | 0.1531 | 0.1651 | 0.169  | 0.206  | 0.142  |   |
| 0.128  | 0.1314 | 0.1401 | 0.1373 | 0.1397 | 0.1521 | 0.1572 | 0.1903 | 0.1504 |   |
| 0.1719 | 0.1898 | 0.1799 | 0.1818 | 0.1704 | 0.1788 | 0.2003 | 0.2185 | 0.1801 |   |
| 0.1253 | 0.1307 | 0.1358 | 0.1434 | 0.1462 | 0.1589 | 0.1649 | 0.1947 | 0.1642 |   |
| 0.1518 | 0.147  | 0.1541 | 0.138  | 0.1316 | 0.1411 | 0.134  | 0.1492 | 0.1289 |   |
| 0.1064 | 0.1065 | 0.1021 | 0.0958 | 0.0972 | 0.0951 | 0.0956 | 0.1011 | 0.088  |   |
| 0.1355 | 0.1263 | 0.133  | 0.1264 | 0.1236 | 0.1311 | 0.132  | 0.139  | 0.1206 |   |
| 0.0767 | 0.078  | 0.0816 | 0.081  | 0.0729 | 0.077  | 0.0778 | 0.0933 | 0.0831 |   |
| 0.0114 | 0.0115 | 0.011  | 0.0113 | 0.0106 | 0.011  | 0.0126 | 0.0134 | 0.0138 |   |
| 0.0461 | 0.0447 | 0.0469 | 0.0483 | 0.045  | 0.0441 | 0.0462 | 0.055  | 0.0434 |   |
| 0.0965 | 0.1049 | 0.109  | 0.115  | 0.1054 | 0.1106 | 0.114  | 0.1349 | 0.108  |   |
| 0.0402 | 0.0453 | 0.0474 | 0.0488 | 0.0536 | 0.0623 | 0.0549 | 0.0621 | 0.0544 |   |
| 0.0079 | 0.0081 | 0.0081 | 0.0087 | 0.008  | 0.0085 | 0.0082 | 0.0089 | 0.0086 |   |
| 0.0044 | 0.0046 | 0.0046 | 0.0042 | 0.0038 | 0.0041 | 0.0042 | 0.0047 | 0.0043 |   |
| 0.0045 | 0.005  | 0.0054 | 0.0064 | 0.0058 | 0.0063 | 0.0065 | 0.0075 | 0.0066 |   |
| 0.0172 | 0.0182 | 0.0172 | 0.0156 | 0.0151 | 0.0161 | 0.0161 | 0.018  | 0.0152 |   |
| 0.0018 | 0.0015 | 0.0015 | 0.0012 | 0.0008 | 0.0009 | 0.0009 | 0.0011 | 0.0008 |   |

|        |        |        |        |        |        |        |        |        |
|--------|--------|--------|--------|--------|--------|--------|--------|--------|
| 0.0041 | 0.0043 | 0.0046 | 0.0044 | 0.0042 | 0.0039 | 0.004  | 0.0042 | 0.0036 |
| 0.0022 | 0.0023 | 0.0023 | 0.0022 | 0.0022 | 0.0022 | 0.0021 | 0.0025 | 0.002  |
| 0.002  | 0.0027 | 0.0027 | 0.0031 | 0.0029 | 0.003  | 0.0033 | 0.0039 | 0.0033 |
| 0      | 0      | 0      | 0      | 0      | 0      | 0      | 0      | 0      |
| 0      | 0      | 0      | 0      | 0      | 0      | 0      | 0      | 0      |
| 0.001  | 0.001  | 0.001  | 0.001  | 0.001  | 0.001  | 0.001  | 0.0009 | 0.0009 |
| 0.0092 | 0.0097 | 0.0098 | 0.0121 | 0.0103 | 0.0111 | 0.0107 | 0.0115 | 0.0107 |
| 0.0029 | 0.0031 | 0.0028 | 0.0029 | 0.0021 | 0.0021 | 0.0021 | 0.002  | 0.0018 |
| 0      | 0      | 0      | 0      | 0      | 0      | 0      | 0      | 0      |
| 0      | 0      | 0      | 0      | 0      | 0      | 0      | 0      | 0      |
| 0      | 0      | 0      | 0      | 0      | 0      | 0      | 0      | 0      |
| 0      | 0      | 0      | 0      | 0      | 0      | 0      | 0      | 0      |
| 0      | 0      | 0      | 0      | 0      | 0      | 0      | 0      | 0      |
| 0      | 0      | 0      | 0      | 0      | 0      | 0      | 0      | 0      |
| 0      | 0      | 0      | 0      | 0      | 0      | 0      | 0      | 0      |
| 0      | 0      | 0      | 0      | 0      | 0      | 0      | 0      | 0      |
| 0      | 0      | 0      | 0      | 0      | 0      | 0      | 0      | 0      |
| 0      | 0      | 0      | 0      | 0      | 0      | 0      | 0      | 0      |
| 0.0108 | 0.0113 | 0.0117 | 0.0111 | 0.0115 | 0.0118 | 0.011  | 0.013  | 0.0107 |
| 0.0022 | 0.0022 | 0.0016 | 0.0022 | 0.0019 | 0.0023 | 0.0024 | 0.003  | 0.0026 |
| 0.0123 | 0.0126 | 0.0133 | 0.0146 | 0.0117 | 0.0134 | 0.0131 | 0.0152 | 0.0128 |
| 0.0094 | 0.0098 | 0.0104 | 0.0106 | 0.0104 | 0.0116 | 0.0123 | 0.0144 | 0.0108 |
| 0.0012 | 0.0013 | 0.0013 | 0.0012 | 0.0012 | 0.001  | 0.0012 | 0.0012 | 0.0012 |
| 0.0015 | 0.0013 | 0.0015 | 0.0014 | 0.0014 | 0.0014 | 0.0013 | 0.0013 | 0.0012 |
| 0.0216 | 0.0211 | 0.0224 | 0.023  | 0.0196 | 0.0203 | 0.0205 | 0.0268 | 0.0233 |
| 0.0297 | 0.0314 | 0.0304 | 0.0284 | 0.0233 | 0.0278 | 0.0255 | 0.0308 | 0.0271 |
| 0.006  | 0.0061 | 0.0064 | 0.0057 | 0.0053 | 0.0051 | 0.0044 | 0.0045 | 0.0045 |
| 0.0817 | 0.0902 | 0.0867 | 0.0935 | 0.0896 | 0.0961 | 0.0971 | 0.1104 | 0.0818 |
| 0.084  | 0.0899 | 0.0887 | 0.0894 | 0.0857 | 0.0942 | 0.098  | 0.1154 | 0.0928 |
| 0.0405 | 0.0419 | 0.0428 | 0.0453 | 0.0417 | 0.0431 | 0.0432 | 0.0469 | 0.042  |
| 0.1404 | 0.1345 | 0.1361 | 0.1261 | 0.1155 | 0.118  | 0.1286 | 0.1449 | 0.1246 |
| 0.1523 | 0.1497 | 0.1525 | 0.1375 | 0.1335 | 0.1371 | 0.1501 | 0.1546 | 0.1318 |
| 0.1704 | 0.1632 | 0.1665 | 0.1459 | 0.1436 | 0.1368 | 0.1479 | 0.1628 | 0.1509 |
| 0.1452 | 0.1434 | 0.1556 | 0.1613 | 0.1589 | 0.1556 | 0.1644 | 0.1755 | 0.1388 |
| 0.162  | 0.1681 | 0.1663 | 0.1408 | 0.1342 | 0.1396 | 0.1451 | 0.1511 | 0.1393 |
| 0.1057 | 0.1105 | 0.1135 | 0.1068 | 0.1055 | 0.1145 | 0.1165 | 0.1257 | 0.11   |
| 0.1419 | 0.1441 | 0.1473 | 0.1436 | 0.1326 | 0.139  | 0.1324 | 0.1468 | 0.1166 |
| 0.0935 | 0.0945 | 0.1006 | 0.0954 | 0.0977 | 0.0973 | 0.0974 | 0.1047 | 0.0843 |
| 0.1209 | 0.1295 | 0.1222 | 0.1099 | 0.1049 | 0.1066 | 0.1104 | 0.1392 | 0.1154 |
| 0.1057 | 0.1213 | 0.1184 | 0.1219 | 0.1358 | 0.1403 | 0.1301 | 0.1527 | 0.1159 |
| 0.107  | 0.1132 | 0.1114 | 0.1134 | 0.1073 | 0.1118 | 0.1123 | 0.1281 | 0.1106 |
| 0.1254 | 0.1203 | 0.1151 | 0.1039 | 0.1028 | 0.1022 | 0.1092 | 0.1131 | 0.1055 |
| 0.0738 | 0.075  | 0.0747 | 0.0759 | 0.0763 | 0.0735 | 0.0749 | 0.0821 | 0.0746 |
| 0.0435 | 0.0451 | 0.0453 | 0.0465 | 0.0441 | 0.0465 | 0.0459 | 0.0548 | 0.0446 |

|        |        |        |        |        |        |        |        |        |
|--------|--------|--------|--------|--------|--------|--------|--------|--------|
| 0.0196 | 0.0206 | 0.0203 | 0.0207 | 0.0201 | 0.0208 | 0.022  | 0.0251 | 0.0218 |
| 0.0081 | 0.008  | 0.0083 | 0.0085 | 0.0083 | 0.0091 | 0.0097 | 0.0119 | 0.0098 |
| 0.0121 | 0.0132 | 0.0134 | 0.0151 | 0.0138 | 0.015  | 0.0163 | 0.0194 | 0.0142 |
| 0.0102 | 0.0108 | 0.0112 | 0.0111 | 0.0107 | 0.0107 | 0.0106 | 0.0111 | 0.0113 |
| 0.0008 | 0.0006 | 0.0006 | 0.0006 | 0.0006 | 0.0006 | 0.0006 | 0.0006 | 0.0005 |
| 0.0023 | 0.0026 | 0.0027 | 0.0023 | 0.0022 | 0.0025 | 0.0026 | 0.0033 | 0.0023 |
| 0.0051 | 0.0056 | 0.0062 | 0.0073 | 0.007  | 0.0071 | 0.0068 | 0.0079 | 0.0077 |
| 0.0037 | 0.0039 | 0.0037 | 0.0037 | 0.0033 | 0.0038 | 0.004  | 0.005  | 0.0048 |
| 0.0091 | 0.01   | 0.0099 | 0.0104 | 0.0072 | 0.0072 | 0.0082 | 0.0106 | 0.0099 |
| 0.0093 | 0.0092 | 0.0071 | 0.0097 | 0.0072 | 0.0078 | 0.0079 | 0.0095 | 0.0087 |
| 0      | 0      | 0      | 0      | 0      | 0      | 0      | 0      | 0      |
| 0.0007 | 0.0008 | 0.0008 | 0.0008 | 0.0007 | 0.0008 | 0.0007 | 0.0007 | 0.0006 |
| 0.0041 | 0.0049 | 0.004  | 0.0044 | 0.0033 | 0.0035 | 0.0039 | 0.0048 | 0.0041 |
| 0      | 0      | 0      | 0      | 0      | 0      | 0      | 0      | 0      |
| 0      | 0      | 0      | 0      | 0      | 0      | 0      | 0      | 0      |
| 0      | 0      | 0      | 0      | 0      | 0      | 0      | 0      | 0      |
| 0      | 0      | 0      | 0      | 0      | 0      | 0      | 0      | 0      |
| 0      | 0      | 0      | 0      | 0      | 0      | 0      | 0      | 0      |
| 0      | 0      | 0      | 0      | 0      | 0      | 0      | 0      | 0      |
| 0      | 0      | 0      | 0      | 0      | 0      | 0      | 0      | 0      |
| 0      | 0      | 0      | 0      | 0      | 0      | 0      | 0      | 0      |
| 0      | 0      | 0      | 0      | 0      | 0      | 0      | 0      | 0      |
| 0      | 0      | 0      | 0      | 0      | 0      | 0      | 0      | 0      |
| 0      | 0      | 0      | 0      | 0      | 0      | 0      | 0      | 0      |
| 0      | 0      | 0      | 0      | 0      | 0      | 0      | 0      | 0      |
| 0      | 0      | 0      | 0      | 0      | 0      | 0      | 0      | 0      |
| 0.0113 | 0.012  | 0.013  | 0.0124 | 0.0139 | 0.0148 | 0.0144 | 0.018  | 0.0145 |
| 0      | 0      | 0      | 0      | 0      | 0      | 0      | 0      | 0      |
| 0      | 0      | 0      | 0      | 0      | 0      | 0      | 0      | 0      |
| 0.0236 | 0.0232 | 0.0236 | 0.0239 | 0.0237 | 0.025  | 0.0261 | 0.0293 | 0.0245 |
| 0.014  | 0.0142 | 0.014  | 0.0145 | 0.0142 | 0.0151 | 0.0158 | 0.0186 | 0.0155 |
| 0      | 0      | 0      | 0      | 0      | 0      | 0      | 0      | 0      |
| 0      | 0      | 0      | 0      | 0      | 0      | 0      | 0      | 0      |
| 0.0289 | 0.0302 | 0.0298 | 0.03   | 0.0288 | 0.0307 | 0.0309 | 0.0367 | 0.0306 |
| 0.0784 | 0.085  | 0.088  | 0.0957 | 0.0968 | 0.1012 | 0.1091 | 0.1183 | 0.0934 |
| 0.1381 | 0.1306 | 0.1285 | 0.1229 | 0.1235 | 0.1251 | 0.1267 | 0.1341 | 0.1117 |
| 0.0973 | 0.0995 | 0.1121 | 0.0979 | 0.0958 | 0.0965 | 0.1016 | 0.1036 | 0.0884 |
| 0.1405 | 0.1284 | 0.1256 | 0.1133 | 0.0995 | 0.1081 | 0.1109 | 0.111  | 0.1    |
| 0.1878 | 0.1843 | 0.1841 | 0.1724 | 0.1587 | 0.1485 | 0.1537 | 0.1485 | 0.1457 |
| 0.1203 | 0.1177 | 0.1179 | 0.1111 | 0.109  | 0.1048 | 0.1147 | 0.11   | 0.1075 |
| 0.1253 | 0.139  | 0.1415 | 0.1336 | 0.1092 | 0.1088 | 0.1061 | 0.1041 | 0.0901 |
| 0.1599 | 0.1677 | 0.1683 | 0.1654 | 0.1605 | 0.1699 | 0.1764 | 0.1761 | 0.1551 |
| 0.1107 | 0.1138 | 0.1127 | 0.1149 | 0.1146 | 0.1183 | 0.1264 | 0.1448 | 0.1191 |
| 0.1445 | 0.1559 | 0.1666 | 0.1681 | 0.1896 | 0.1986 | 0.2091 | 0.2378 | 0.1888 |
| 0.152  | 0.1492 | 0.1443 | 0.1435 | 0.1434 | 0.1472 | 0.1575 | 0.1841 | 0.1557 |

|        |        |        |        |        |        |        |        |        |
|--------|--------|--------|--------|--------|--------|--------|--------|--------|
| 0.1304 | 0.1488 | 0.1485 | 0.138  | 0.1432 | 0.1467 | 0.155  | 0.1959 | 0.1507 |
| 0.1621 | 0.1678 | 0.1671 | 0.1719 | 0.1706 | 0.1858 | 0.1857 | 0.2164 | 0.1725 |
| 0.1209 | 0.1239 | 0.1238 | 0.1271 | 0.12   | 0.1241 | 0.1255 | 0.1414 | 0.1164 |
| 0.1827 | 0.1718 | 0.1558 | 0.1433 | 0.1331 | 0.135  | 0.1399 | 0.1453 | 0.1267 |
| 0.1736 | 0.1683 | 0.1614 | 0.1627 | 0.1484 | 0.1543 | 0.169  | 0.1846 | 0.1716 |
| 0.0673 | 0.0697 | 0.0672 | 0.0649 | 0.0639 | 0.0666 | 0.0662 | 0.0716 | 0.0654 |
| 0.0199 | 0.0231 | 0.0234 | 0.0244 | 0.0233 | 0.0241 | 0.0249 | 0.0289 | 0.0217 |
| 0.0076 | 0.0082 | 0.0094 | 0.0099 | 0.0086 | 0.0075 | 0.0067 | 0.0098 | 0.0078 |
| 0.0224 | 0.0231 | 0.0228 | 0.0266 | 0.0229 | 0.026  | 0.025  | 0.0304 | 0.0272 |
| 0.0197 | 0.0207 | 0.0223 | 0.0236 | 0.0223 | 0.0239 | 0.0232 | 0.027  | 0.022  |
| 0      | 0      | 0      | 0      | 0      | 0      | 0      | 0      | 0      |
| 0.0016 | 0.0016 | 0.0015 | 0.0014 | 0.0013 | 0.0013 | 0.0012 | 0.0012 | 0.0013 |
| 0.0038 | 0.0039 | 0.004  | 0.0037 | 0.0035 | 0.0037 | 0.0038 | 0.0039 | 0.0034 |
| 0.0022 | 0.0022 | 0.0022 | 0.0022 | 0.0021 | 0.0022 | 0.0023 | 0.0026 | 0.0021 |
| 0.0046 | 0.005  | 0.0044 | 0.005  | 0.0043 | 0.0047 | 0.0052 | 0.0062 | 0.0049 |
| 0.0092 | 0.0098 | 0.0079 | 0.0071 | 0.006  | 0.0068 | 0.0075 | 0.0099 | 0.0087 |
| 0.0021 | 0.0028 | 0.0028 | 0.0031 | 0.0029 | 0.0026 | 0.0025 | 0.0028 | 0.0024 |
| 0.0028 | 0.0029 | 0.0029 | 0.003  | 0.0025 | 0.0025 | 0.0021 | 0.0026 | 0.0024 |
| 0.002  | 0.0021 | 0.002  | 0.0019 | 0.0013 | 0.0011 | 0.0015 | 0.002  | 0.0018 |
| 0      | 0      | 0      | 0      | 0      | 0      | 0      | 0      | 0      |
| 0      | 0      | 0      | 0      | 0      | 0      | 0      | 0      | 0      |
| 0      | 0      | 0      | 0      | 0      | 0      | 0      | 0      | 0      |
| 0      | 0      | 0      | 0      | 0      | 0      | 0      | 0      | 0      |
| 0      | 0      | 0      | 0      | 0      | 0      | 0      | 0      | 0      |
| 0      | 0      | 0      | 0      | 0      | 0      | 0      | 0      | 0      |
| 0      | 0      | 0      | 0      | 0      | 0      | 0      | 0      | 0      |
| 0      | 0      | 0      | 0      | 0      | 0      | 0      | 0      | 0      |
| 0      | 0      | 0      | 0      | 0      | 0      | 0      | 0      | 0      |
| 0      | 0      | 0      | 0      | 0      | 0      | 0      | 0      | 0      |
| 0      | 0      | 0      | 0      | 0      | 0      | 0      | 0      | 0      |
| 0      | 0      | 0      | 0      | 0      | 0      | 0      | 0      | 0      |
| 0.0015 | 0.0014 | 0.0014 | 0.0013 | 0.0013 | 0.0012 | 0.0013 | 0.0014 | 0.0013 |
| 0.0116 | 0.013  | 0.0129 | 0.013  | 0.012  | 0.0128 | 0.0129 | 0.0154 | 0.0131 |
| 0.0148 | 0.0191 | 0.0154 | 0.0203 | 0.019  | 0.0219 | 0.0264 | 0.029  | 0.0302 |
| 0.0301 | 0.0315 | 0.0317 | 0.0328 | 0.0308 | 0.0322 | 0.0296 | 0.0319 | 0.0337 |
| 0.0369 | 0.0398 | 0.0411 | 0.0412 | 0.0389 | 0.0444 | 0.0445 | 0.0519 | 0.0423 |
| 0.0176 | 0.0185 | 0.0163 | 0.0151 | 0.0144 | 0.0152 | 0.0166 | 0.0179 | 0.0161 |
| 0.0196 | 0.0207 | 0.0216 | 0.022  | 0.0206 | 0.0207 | 0.0195 | 0.0209 | 0.0191 |
| 0.0842 | 0.0872 | 0.0847 | 0.0924 | 0.0872 | 0.1026 | 0.1057 | 0.1259 | 0.0939 |
| 0.0419 | 0.0448 | 0.046  | 0.048  | 0.045  | 0.0491 | 0.0497 | 0.0617 | 0.0475 |
| 0.0648 | 0.0672 | 0.0683 | 0.0647 | 0.0609 | 0.0609 | 0.0619 | 0.0678 | 0.0603 |
| 0.1425 | 0.1391 | 0.1395 | 0.1324 | 0.1334 | 0.137  | 0.1416 | 0.1472 | 0.1326 |
| 0.1364 | 0.1419 | 0.1379 | 0.1263 | 0.1267 | 0.1252 | 0.1305 | 0.144  | 0.1211 |
| 0.1494 | 0.1404 | 0.1415 | 0.1311 | 0.1269 | 0.1277 | 0.1267 | 0.1133 | 0.1229 |
| 0.1426 | 0.1401 | 0.147  | 0.1453 | 0.1408 | 0.1549 | 0.163  | 0.1549 | 0.1434 |



|        |        |        |        |        |        |        |        |        |
|--------|--------|--------|--------|--------|--------|--------|--------|--------|
| 0.1422 | 0.1405 | 0.1427 | 0.1389 | 0.1245 | 0.129  | 0.1317 | 0.1373 | 0.1229 |
| 0.0983 | 0.1047 | 0.1093 | 0.1084 | 0.095  | 0.0985 | 0.1018 | 0.1055 | 0.0877 |
| 0.0971 | 0.0955 | 0.0874 | 0.087  | 0.0825 | 0.0826 | 0.0836 | 0.0798 | 0.066  |
| 0.1471 | 0.1419 | 0.1556 | 0.1545 | 0.1644 | 0.1684 | 0.1672 | 0.1819 | 0.1473 |
| 0.1398 | 0.1395 | 0.1455 | 0.1347 | 0.1357 | 0.1429 | 0.1569 | 0.1695 | 0.1461 |
| 0.1053 | 0.1087 | 0.1055 | 0.0999 | 0.1038 | 0.1107 | 0.1086 | 0.1222 | 0.1053 |
| 0.1384 | 0.1348 | 0.1429 | 0.1425 | 0.1341 | 0.1444 | 0.1434 | 0.1597 | 0.1343 |
| 0.1327 | 0.1366 | 0.1266 | 0.1206 | 0.1105 | 0.103  | 0.1083 | 0.116  | 0.1006 |
| 0.1179 | 0.121  | 0.1152 | 0.1077 | 0.1055 | 0.1152 | 0.1203 | 0.1311 | 0.1055 |
| 0.115  | 0.1066 | 0.1083 | 0.1137 | 0.1111 | 0.1128 | 0.1162 | 0.1247 | 0.1077 |
| 0.1642 | 0.1728 | 0.1748 | 0.1722 | 0.1552 | 0.1456 | 0.1495 | 0.1654 | 0.15   |
| 0.1216 | 0.1237 | 0.1151 | 0.1102 | 0.0985 | 0.0925 | 0.0906 | 0.0926 | 0.09   |
| 0.0476 | 0.0485 | 0.0485 | 0.0476 | 0.0452 | 0.0469 | 0.049  | 0.0534 | 0.0471 |
| 0.0438 | 0.0476 | 0.0467 | 0.0499 | 0.0498 | 0.0581 | 0.0586 | 0.0717 | 0.0596 |
| 0.099  | 0.0977 | 0.1004 | 0.1079 | 0.1023 | 0.1051 | 0.1126 | 0.1319 | 0.1177 |
| 0.079  | 0.0845 | 0.0811 | 0.0859 | 0.0742 | 0.0754 | 0.0788 | 0.0857 | 0.0742 |
| 0.0102 | 0.0119 | 0.0111 | 0.0132 | 0.0115 | 0.0133 | 0.0139 | 0.0154 | 0.0165 |
| 0.0533 | 0.0569 | 0.056  | 0.0551 | 0.052  | 0.0518 | 0.0543 | 0.0593 | 0.051  |
| 0.0042 | 0.0041 | 0.0043 | 0.0041 | 0.0039 | 0.0039 | 0.0039 | 0.004  | 0.0038 |
| 0.0024 | 0.0023 | 0.0022 | 0.0022 | 0.0021 | 0.0021 | 0.0021 | 0.0022 | 0.002  |
| 0.0011 | 0.0011 | 0.0011 | 0.0011 | 0.0011 | 0.0012 | 0.0012 | 0.0014 | 0.0011 |
| 0      | 0      | 0      | 0      | 0      | 0      | 0      | 0      | 0      |
| 0      | 0      | 0      | 0      | 0      | 0      | 0      | 0      | 0      |
| 0.0006 | 0.0007 | 0.0006 | 0.0006 | 0.0006 | 0.0006 | 0.0007 | 0.0006 | 0.0006 |
| 0.0017 | 0.0022 | 0.0021 | 0.0033 | 0.0034 | 0.0038 | 0.0036 | 0.0046 | 0.0052 |
| 0      | 0      | 0      | 0      | 0      | 0      | 0      | 0      | 0      |
| 0      | 0      | 0      | 0      | 0      | 0      | 0      | 0      | 0      |
| 0      | 0      | 0      | 0      | 0      | 0      | 0      | 0      | 0      |
| 0      | 0      | 0      | 0      | 0      | 0      | 0      | 0      | 0      |
| 0      | 0      | 0      | 0      | 0      | 0      | 0      | 0      | 0      |
| 0      | 0      | 0      | 0      | 0      | 0      | 0      | 0      | 0      |
| 0      | 0      | 0      | 0      | 0      | 0      | 0      | 0      | 0      |
| 0      | 0      | 0      | 0      | 0      | 0      | 0      | 0      | 0      |
| 0      | 0      | 0      | 0      | 0      | 0      | 0      | 0      | 0      |
| 0      | 0      | 0      | 0      | 0      | 0      | 0      | 0      | 0      |
| 0      | 0      | 0      | 0      | 0      | 0      | 0      | 0      | 0      |
| 0      | 0      | 0      | 0      | 0      | 0      | 0      | 0      | 0      |
| 0.036  | 0.0377 | 0.0387 | 0.0406 | 0.038  | 0.0435 | 0.0436 | 0.0531 | 0.0419 |
| 0      | 0      | 0      | 0      | 0      | 0      | 0      | 0      | 0      |
| 0.0048 | 0.0055 | 0.0059 | 0.0062 | 0.0053 | 0.0056 | 0.0062 | 0.0081 | 0.0061 |
| 0.0093 | 0.0103 | 0.0094 | 0.0092 | 0.0096 | 0.01   | 0.0096 | 0.0115 | 0.0088 |
| 0.043  | 0.0438 | 0.0415 | 0.0423 | 0.0398 | 0.0418 | 0.043  | 0.0493 | 0.0441 |
| 0.1203 | 0.1263 | 0.1239 | 0.1244 | 0.1137 | 0.1225 | 0.1271 | 0.1509 | 0.1278 |
| 0.1331 | 0.1396 | 0.1366 | 0.1402 | 0.1337 | 0.1422 | 0.1429 | 0.1664 | 0.1413 |
| 0.0814 | 0.0871 | 0.0848 | 0.0915 | 0.0832 | 0.0917 | 0.0928 | 0.1112 | 0.0947 |

|        |        |        |        |        |        |        |        |        |
|--------|--------|--------|--------|--------|--------|--------|--------|--------|
| 0.0964 | 0.0948 | 0.1011 | 0.0948 | 0.09   | 0.0843 | 0.09   | 0.0928 | 0.0837 |
| 0.0801 | 0.0796 | 0.0732 | 0.0758 | 0.0731 | 0.0728 | 0.0762 | 0.0824 | 0.0743 |
| 0.1357 | 0.136  | 0.1496 | 0.1429 | 0.1388 | 0.1328 | 0.136  | 0.1319 | 0.123  |
| 0.1565 | 0.1502 | 0.1466 | 0.134  | 0.1407 | 0.1338 | 0.1299 | 0.1428 | 0.126  |
| 0.1481 | 0.1529 | 0.1544 | 0.145  | 0.1386 | 0.1357 | 0.1408 | 0.1448 | 0.1317 |
| 0.1647 | 0.1646 | 0.1718 | 0.1559 | 0.1453 | 0.1518 | 0.1537 | 0.1586 | 0.151  |
| 0.1384 | 0.1421 | 0.1359 | 0.1375 | 0.1329 | 0.1486 | 0.1539 | 0.1489 | 0.131  |
| 0.1186 | 0.1211 | 0.1208 | 0.1217 | 0.1247 | 0.136  | 0.1511 | 0.1704 | 0.1371 |
| 0.1027 | 0.1101 | 0.1165 | 0.118  | 0.1207 | 0.1202 | 0.13   | 0.1474 | 0.1246 |
| 0.1567 | 0.1617 | 0.1508 | 0.1593 | 0.16   | 0.1593 | 0.1661 | 0.1927 | 0.1509 |
| 0.1315 | 0.1379 | 0.139  | 0.1253 | 0.1167 | 0.1241 | 0.1263 | 0.1471 | 0.1281 |
| 0.1248 | 0.1312 | 0.137  | 0.1381 | 0.1332 | 0.1326 | 0.1304 | 0.1511 | 0.1275 |
| 0.1284 | 0.1325 | 0.1247 | 0.1294 | 0.1236 | 0.1379 | 0.1329 | 0.1594 | 0.1178 |
| 0.1141 | 0.1139 | 0.1145 | 0.117  | 0.1162 | 0.1345 | 0.1413 | 0.163  | 0.1337 |
| 0.1317 | 0.1409 | 0.1497 | 0.1515 | 0.1554 | 0.1571 | 0.1621 | 0.2067 | 0.1546 |
| 0.1806 | 0.1859 | 0.1732 | 0.1802 | 0.1719 | 0.185  | 0.1967 | 0.2388 | 0.1791 |
| 0.0958 | 0.0942 | 0.0914 | 0.0917 | 0.0846 | 0.09   | 0.0874 | 0.1089 | 0.0914 |
| 0.1633 | 0.1612 | 0.165  | 0.1573 | 0.1445 | 0.1524 | 0.1551 | 0.1733 | 0.1629 |
| 0.1135 | 0.1213 | 0.1231 | 0.1163 | 0.1107 | 0.1188 | 0.1229 | 0.1353 | 0.1248 |
| 0.0747 | 0.0785 | 0.0823 | 0.0784 | 0.074  | 0.0744 | 0.0753 | 0.0862 | 0.0598 |
| 0.1011 | 0.1084 | 0.1122 | 0.1153 | 0.1019 | 0.1048 | 0.1047 | 0.1193 | 0.1053 |
| 0.0753 | 0.0932 | 0.0983 | 0.1102 | 0.1008 | 0.1165 | 0.1089 | 0.1466 | 0.1404 |
| 0.0681 | 0.0752 | 0.0722 | 0.0713 | 0.0658 | 0.0705 | 0.0747 | 0.088  | 0.0755 |
| 0.091  | 0.1044 | 0.1126 | 0.1261 | 0.1193 | 0.1238 | 0.1271 | 0.147  | 0.1237 |
| 0.0254 | 0.0296 | 0.0302 | 0.0332 | 0.0274 | 0.0299 | 0.0306 | 0.0352 | 0.0302 |
| 0.0024 | 0.0024 | 0.0026 | 0.0024 | 0.0025 | 0.0025 | 0.0027 | 0.0029 | 0.0025 |
| 0.0008 | 0.0009 | 0.001  | 0.0009 | 0.0009 | 0.0009 | 0.001  | 0.0012 | 0.0009 |
| 0      | 0      | 0      | 0      | 0      | 0      | 0      | 0      | 0      |
| 0      | 0      | 0      | 0      | 0      | 0      | 0      | 0      | 0      |
| 0.0009 | 0.0009 | 0.0008 | 0.0008 | 0.0007 | 0.0007 | 0.0007 | 0.0007 | 0.0007 |
| 0.0042 | 0.0042 | 0.0038 | 0.0045 | 0.0046 | 0.0045 | 0.0048 | 0.006  | 0.0055 |
| 0.0049 | 0.0054 | 0.0052 | 0.0053 | 0.0051 | 0.0056 | 0.0054 | 0.0062 | 0.0069 |
| 0      | 0      | 0      | 0      | 0      | 0      | 0      | 0      | 0      |
| 0      | 0      | 0      | 0      | 0      | 0      | 0      | 0      | 0      |
| 0      | 0      | 0      | 0      | 0      | 0      | 0      | 0      | 0      |
| 0      | 0      | 0      | 0      | 0      | 0      | 0      | 0      | 0      |
| 0      | 0      | 0      | 0      | 0      | 0      | 0      | 0      | 0      |
| 0      | 0      | 0      | 0      | 0      | 0      | 0      | 0      | 0      |
| 0      | 0      | 0      | 0      | 0      | 0      | 0      | 0      | 0      |
| 0      | 0      | 0      | 0      | 0      | 0      | 0      | 0      | 0      |
| 0      | 0      | 0      | 0      | 0      | 0      | 0      | 0      | 0      |
| 0      | 0      | 0      | 0      | 0      | 0      | 0      | 0      | 0      |
| 0      | 0      | 0      | 0      | 0      | 0      | 0      | 0      | 0      |
| 0.0143 | 0.0145 | 0.0145 | 0.0152 | 0.015  | 0.0147 | 0.0144 | 0.0162 | 0.0136 |



|        |        |        |        |        |        |        |        |        |
|--------|--------|--------|--------|--------|--------|--------|--------|--------|
| 0      | 0      | 0      | 0      | 0      | 0      | 0      | 0      | 0      |
| 0      | 0      | 0      | 0      | 0      | 0      | 0      | 0      | 0      |
| 0      | 0      | 0      | 0      | 0      | 0      | 0      | 0      | 0      |
| 0      | 0      | 0      | 0      | 0      | 0      | 0      | 0      | 0      |
| 0      | 0      | 0      | 0      | 0      | 0      | 0      | 0      | 0      |
| 0.0091 | 0.0083 | 0.0079 | 0.0068 | 0.0061 | 0.0057 | 0.0065 | 0.0055 | 0.0059 |
| 0      | 0      | 0      | 0      | 0      | 0      | 0      | 0      | 0      |
| 0.0363 | 0.0374 | 0.0371 | 0.0381 | 0.0359 | 0.0381 | 0.0384 | 0.0432 | 0.0365 |
| 0.1102 | 0.1141 | 0.1156 | 0.1173 | 0.1115 | 0.115  | 0.1155 | 0.127  | 0.1073 |
| 0.0545 | 0.0607 | 0.0656 | 0.0692 | 0.0541 | 0.0603 | 0.0565 | 0.0602 | 0.0544 |
| 0.0425 | 0.0462 | 0.044  | 0.0455 | 0.0433 | 0.0481 | 0.0501 | 0.0604 | 0.0502 |
| 0.1736 | 0.1928 | 0.2093 | 0.2005 | 0.2136 | 0.23   | 0.2307 | 0.2696 | 0.2067 |
| 0.1677 | 0.1725 | 0.1718 | 0.1693 | 0.1822 | 0.1759 | 0.1808 | 0.2125 | 0.1782 |
| 0.1483 | 0.1491 | 0.152  | 0.1521 | 0.1411 | 0.147  | 0.151  | 0.1677 | 0.1427 |
| 0.14   | 0.1474 | 0.1502 | 0.1527 | 0.1455 | 0.1541 | 0.1505 | 0.1774 | 0.1495 |
| 0.1534 | 0.1622 | 0.1613 | 0.1666 | 0.1526 | 0.1622 | 0.1693 | 0.1899 | 0.1668 |
| 0.1164 | 0.1275 | 0.1258 | 0.126  | 0.1182 | 0.1249 | 0.1278 | 0.1516 | 0.1288 |
| 0.1401 | 0.1467 | 0.1446 | 0.1466 | 0.1367 | 0.1434 | 0.1448 | 0.1687 | 0.1491 |
| 0.1611 | 0.1578 | 0.1569 | 0.1521 | 0.1449 | 0.1523 | 0.1539 | 0.1735 | 0.143  |
| 0.1469 | 0.1456 | 0.147  | 0.1358 | 0.132  | 0.1282 | 0.1302 | 0.14   | 0.1271 |
| 0.1141 | 0.1158 | 0.1179 | 0.1171 | 0.1155 | 0.1191 | 0.1139 | 0.1271 | 0.1099 |
| 0.1169 | 0.1176 | 0.1199 | 0.1195 | 0.113  | 0.1136 | 0.1163 | 0.1361 | 0.1113 |
| 0.1308 | 0.1224 | 0.1218 | 0.119  | 0.1348 | 0.1411 | 0.1493 | 0.171  | 0.1499 |
| 0.1466 | 0.1431 | 0.1497 | 0.1411 | 0.1354 | 0.1472 | 0.1459 | 0.1559 | 0.1288 |
| 0.1349 | 0.135  | 0.134  | 0.1179 | 0.1124 | 0.1359 | 0.1425 | 0.1464 | 0.1283 |
| 0.1778 | 0.1786 | 0.1727 | 0.1643 | 0.1562 | 0.1566 | 0.1693 | 0.172  | 0.161  |
| 0.1724 | 0.165  | 0.16   | 0.1631 | 0.1537 | 0.15   | 0.1541 | 0.1564 | 0.1482 |
| 0.1383 | 0.1444 | 0.1585 | 0.1492 | 0.151  | 0.1506 | 0.1498 | 0.161  | 0.1466 |
| 0.1816 | 0.1961 | 0.1958 | 0.1901 | 0.175  | 0.1825 | 0.1911 | 0.2074 | 0.1863 |
| 0.1443 | 0.1473 | 0.1441 | 0.1474 | 0.1371 | 0.1407 | 0.1399 | 0.158  | 0.1374 |
| 0.1587 | 0.1624 | 0.1676 | 0.1744 | 0.1743 | 0.1828 | 0.1893 | 0.2214 | 0.1891 |
| 0.1809 | 0.1974 | 0.1846 | 0.1862 | 0.2007 | 0.2199 | 0.2197 | 0.2625 | 0.1845 |
| 0.1552 | 0.1629 | 0.1589 | 0.1636 | 0.1611 | 0.1793 | 0.1894 | 0.2385 | 0.1948 |
| 0.1471 | 0.1609 | 0.1566 | 0.1661 | 0.158  | 0.1686 | 0.1758 | 0.2089 | 0.1823 |
| 0.0833 | 0.1028 | 0.1007 | 0.1195 | 0.1176 | 0.1348 | 0.1328 | 0.166  | 0.1492 |
| 0.0686 | 0.0906 | 0.0927 | 0.0979 | 0.0894 | 0.096  | 0.0949 | 0.118  | 0.0871 |
| 0.0463 | 0.0477 | 0.0528 | 0.0554 | 0.0507 | 0.0484 | 0.0514 | 0.0617 | 0.0545 |
| 0.012  | 0.0122 | 0.0106 | 0.0131 | 0.0096 | 0.0095 | 0.0103 | 0.0147 | 0.0154 |
| 0.0008 | 0.0008 | 0.0008 | 0.0008 | 0.0008 | 0.0008 | 0.0009 | 0.0012 | 0.0009 |
| 0.0057 | 0.0058 | 0.0056 | 0.0061 | 0.0054 | 0.0053 | 0.0047 | 0.0056 | 0.0049 |
| 0      | 0      | 0      | 0      | 0      | 0      | 0      | 0      | 0      |
| 0.0008 | 0.0008 | 0.0008 | 0.0007 | 0.0006 | 0.0005 | 0.0006 | 0.0007 | 0.0006 |
| 0.0006 | 0.0006 | 0.0007 | 0.0007 | 0.0007 | 0.0006 | 0.0007 | 0.0007 | 0.0007 |
| 0.0012 | 0.0011 | 0.0009 | 0.0011 | 0.0008 | 0.0007 | 0.0008 | 0.0009 | 0.001  |

|        |        |        |        |        |        |        |        |        |   |
|--------|--------|--------|--------|--------|--------|--------|--------|--------|---|
| 0      | 0      | 0      | 0      | 0      | 0      | 0      | 0      | 0      | 0 |
| 0      | 0      | 0      | 0      | 0      | 0      | 0      | 0      | 0      | 0 |
| 0      | 0      | 0      | 0      | 0      | 0      | 0      | 0      | 0      | 0 |
| 0      | 0      | 0      | 0      | 0      | 0      | 0      | 0      | 0      | 0 |
| 0      | 0      | 0      | 0      | 0      | 0      | 0      | 0      | 0      | 0 |
| 0      | 0      | 0      | 0      | 0      | 0      | 0      | 0      | 0      | 0 |
| 0      | 0      | 0      | 0      | 0      | 0      | 0      | 0      | 0      | 0 |
| 0      | 0      | 0      | 0      | 0      | 0      | 0      | 0      | 0      | 0 |
| 0      | 0      | 0      | 0      | 0      | 0      | 0      | 0      | 0      | 0 |
| 0      | 0      | 0      | 0      | 0      | 0      | 0      | 0      | 0      | 0 |
| 0.0119 | 0.0127 | 0.0124 | 0.0128 | 0.0126 | 0.0138 | 0.0143 | 0.0165 | 0.0137 |   |
| 0.0031 | 0.0033 | 0.0033 | 0.0032 | 0.0033 | 0.0038 | 0.0039 | 0.0051 | 0.0038 |   |
| 0      | 0      | 0      | 0      | 0      | 0      | 0      | 0      | 0      |   |
| 0.0428 | 0.0436 | 0.0472 | 0.0438 | 0.0427 | 0.0434 | 0.0457 | 0.0518 | 0.0444 |   |
| 0.1003 | 0.1098 | 0.1111 | 0.1124 | 0.1086 | 0.1151 | 0.1172 | 0.1341 | 0.1085 |   |
| 0.1241 | 0.1283 | 0.1147 | 0.1322 | 0.127  | 0.1371 | 0.1402 | 0.1633 | 0.143  |   |
| 0.1512 | 0.1448 | 0.144  | 0.1676 | 0.1646 | 0.1864 | 0.1749 | 0.1967 | 0.1924 |   |
| 0.2229 | 0.2178 | 0.2331 | 0.2428 | 0.2241 | 0.2229 | 0.2496 | 0.2983 | 0.2622 |   |
| 0.1483 | 0.1539 | 0.1484 | 0.1512 | 0.154  | 0.1533 | 0.1497 | 0.1633 | 0.1416 |   |
| 0.1408 | 0.158  | 0.1615 | 0.1569 | 0.145  | 0.1542 | 0.1636 | 0.1791 | 0.1636 |   |
| 0.1638 | 0.1692 | 0.1532 | 0.1916 | 0.1577 | 0.1654 | 0.1643 | 0.1909 | 0.1835 |   |
| 0.2407 | 0.2304 | 0.2083 | 0.2107 | 0.1811 | 0.1927 | 0.1854 | 0.2093 | 0.2065 |   |
| 0.1929 | 0.1927 | 0.1882 | 0.1808 | 0.1719 | 0.1705 | 0.1801 | 0.1927 | 0.1784 |   |
| 0.1422 | 0.1512 | 0.1597 | 0.1503 | 0.1365 | 0.1275 | 0.1306 | 0.1322 | 0.1287 |   |
| 0.152  | 0.1473 | 0.1411 | 0.139  | 0.1352 | 0.1262 | 0.1393 | 0.1543 | 0.148  |   |
| 0.1465 | 0.1512 | 0.1574 | 0.1435 | 0.131  | 0.1303 | 0.1337 | 0.1462 | 0.1303 |   |
| 0.1087 | 0.1033 | 0.1109 | 0.1059 | 0.0971 | 0.0977 | 0.1088 | 0.1097 | 0.0972 |   |
| 0.1592 | 0.158  | 0.1544 | 0.1632 | 0.1561 | 0.1487 | 0.1569 | 0.1678 | 0.1323 |   |
| 0.1431 | 0.1352 | 0.1398 | 0.1272 | 0.1197 | 0.1114 | 0.1147 | 0.1298 | 0.1235 |   |
| 0.1688 | 0.1703 | 0.1677 | 0.1622 | 0.1569 | 0.157  | 0.1615 | 0.1698 | 0.1514 |   |
| 0.1223 | 0.1326 | 0.1269 | 0.1368 | 0.1137 | 0.1175 | 0.1245 | 0.132  | 0.125  |   |
| 0.1827 | 0.1827 | 0.1875 | 0.1805 | 0.1652 | 0.1663 | 0.1675 | 0.1824 | 0.1719 |   |
| 0.1497 | 0.1469 | 0.1447 | 0.1478 | 0.1253 | 0.1296 | 0.147  | 0.1528 | 0.1483 |   |
| 0.138  | 0.1341 | 0.138  | 0.118  | 0.1121 | 0.1027 | 0.109  | 0.1176 | 0.1135 |   |
| 0.1716 | 0.1677 | 0.1627 | 0.1619 | 0.1601 | 0.171  | 0.1951 | 0.1927 | 0.1735 |   |
| 0.1747 | 0.1694 | 0.1632 | 0.1452 | 0.156  | 0.1424 | 0.1486 | 0.1597 | 0.1502 |   |
| 0.1526 | 0.1665 | 0.1726 | 0.1685 | 0.163  | 0.1703 | 0.1816 | 0.1988 | 0.1566 |   |
| 0.1941 | 0.2026 | 0.197  | 0.1983 | 0.1978 | 0.1985 | 0.2232 | 0.2644 | 0.206  |   |
| 0.1876 | 0.1877 | 0.197  | 0.1997 | 0.1907 | 0.2017 | 0.2044 | 0.2489 | 0.1764 |   |
| 0.179  | 0.1932 | 0.202  | 0.2046 | 0.1937 | 0.2101 | 0.2099 | 0.2623 | 0.2093 |   |
| 0.1688 | 0.1704 | 0.169  | 0.1787 | 0.1806 | 0.1942 | 0.212  | 0.2574 | 0.2045 |   |
| 0.0773 | 0.0788 | 0.0778 | 0.0835 | 0.0751 | 0.0819 | 0.0886 | 0.1075 | 0.0882 |   |
| 0.0226 | 0.0225 | 0.0207 | 0.0258 | 0.0196 | 0.0173 | 0.0177 | 0.0217 | 0.0234 |   |
| 0.0023 | 0.0024 | 0.0025 | 0.0024 | 0.0024 | 0.0025 | 0.0024 | 0.0026 | 0.0021 |   |

|        |        |        |        |        |        |        |        |        |
|--------|--------|--------|--------|--------|--------|--------|--------|--------|
| 0.0008 | 0.0009 | 0.0009 | 0.001  | 0.001  | 0.0011 | 0.001  | 0.0012 | 0.0009 |
| 0      | 0      | 0      | 0      | 0      | 0      | 0      | 0      | 0      |
| 0      | 0      | 0      | 0      | 0      | 0      | 0      | 0      | 0      |
| 0.0008 | 0.0007 | 0.0008 | 0.0007 | 0.0007 | 0.0007 | 0.0007 | 0.0006 | 0.0005 |
| 0.0006 | 0.0006 | 0.0005 | 0.0004 | 0.0004 | 0.0004 | 0.0004 | 0.0005 | 0.0005 |
| 0.0011 | 0.0014 | 0.0012 | 0.0014 | 0.0015 | 0.0016 | 0.0016 | 0.0019 | 0.0018 |
| 0      | 0      | 0      | 0      | 0      | 0      | 0      | 0      | 0      |
| 0      | 0      | 0      | 0      | 0      | 0      | 0      | 0      | 0      |
| 0.003  | 0.0031 | 0.0027 | 0.0027 | 0.0029 | 0.0031 | 0.0031 | 0.0046 | 0.0037 |
| 0      | 0      | 0      | 0      | 0      | 0      | 0      | 0      | 0      |
| 0      | 0      | 0      | 0      | 0      | 0      | 0      | 0      | 0      |
| 0.0006 | 0.0006 | 0.0006 | 0.0006 | 0.0006 | 0.0006 | 0.0006 | 0.0006 | 0.0005 |
| 0.0082 | 0.0086 | 0.0087 | 0.0078 | 0.0077 | 0.0076 | 0.0076 | 0.0084 | 0.0062 |
| 0.004  | 0.0041 | 0.0043 | 0.0043 | 0.0043 | 0.0043 | 0.0045 | 0.0052 | 0.0041 |
| 0.001  | 0.0009 | 0.001  | 0.001  | 0.0009 | 0.0009 | 0.001  | 0.0013 | 0.0009 |
| 0.0052 | 0.0053 | 0.0055 | 0.0053 | 0.0054 | 0.0062 | 0.0065 | 0.0072 | 0.0054 |
| 0      | 0      | 0      | 0      | 0      | 0      | 0      | 0      | 0      |
| 0.0333 | 0.032  | 0.0326 | 0.039  | 0.0348 | 0.0383 | 0.0352 | 0.0426 | 0.0409 |
| 0.002  | 0.002  | 0.0023 | 0.0023 | 0.0022 | 0.0024 | 0.0026 | 0.0031 | 0.0025 |
| 0.0731 | 0.0741 | 0.0717 | 0.0711 | 0.0595 | 0.0629 | 0.0651 | 0.0747 | 0.0685 |
| 0.0406 | 0.0428 | 0.0459 | 0.0483 | 0.0456 | 0.0509 | 0.0511 | 0.0659 | 0.0539 |
| 0.0561 | 0.0647 | 0.0602 | 0.0674 | 0.0593 | 0.0666 | 0.0672 | 0.0749 | 0.0696 |
| 0.1124 | 0.1141 | 0.1144 | 0.1162 | 0.0984 | 0.1112 | 0.1145 | 0.141  | 0.1267 |
| 0.2302 | 0.2515 | 0.2342 | 0.2112 | 0.1889 | 0.1944 | 0.2359 | 0.2949 | 0.2407 |
| 0.2891 | 0.2687 | 0.2535 | 0.319  | 0.2579 | 0.2647 | 0.2569 | 0.3146 | 0.2766 |
| 0.1855 | 0.1832 | 0.1671 | 0.1663 | 0.1553 | 0.1848 | 0.1924 | 0.2347 | 0.22   |
| 0.1462 | 0.1597 | 0.1604 | 0.1624 | 0.1582 | 0.1615 | 0.164  | 0.1821 | 0.1523 |
| 0.1396 | 0.1379 | 0.1382 | 0.1402 | 0.1303 | 0.1157 | 0.112  | 0.1186 | 0.1184 |
| 0.1454 | 0.1531 | 0.1567 | 0.1472 | 0.1337 | 0.1335 | 0.1256 | 0.1385 | 0.1292 |
| 0.1816 | 0.1614 | 0.1538 | 0.1418 | 0.1216 | 0.126  | 0.1217 | 0.1205 | 0.1052 |
| 0.1697 | 0.1619 | 0.1542 | 0.1501 | 0.1519 | 0.1365 | 0.1436 | 0.1558 | 0.1458 |
| 0.1668 | 0.1567 | 0.1495 | 0.1423 | 0.1285 | 0.1248 | 0.1242 | 0.1303 | 0.1289 |
| 0.164  | 0.1546 | 0.136  | 0.1379 | 0.1346 | 0.1309 | 0.1276 | 0.1213 | 0.1108 |
| 0.1755 | 0.1825 | 0.1802 | 0.1817 | 0.1644 | 0.1721 | 0.1876 | 0.1977 | 0.1956 |
| 0.1337 | 0.1249 | 0.1261 | 0.1171 | 0.1248 | 0.114  | 0.1125 | 0.1214 | 0.1154 |
| 0.1238 | 0.1181 | 0.1246 | 0.1147 | 0.109  | 0.1104 | 0.1192 | 0.1302 | 0.1045 |
| 0.201  | 0.2072 | 0.2156 | 0.2283 | 0.199  | 0.2003 | 0.1907 | 0.2172 | 0.1892 |
| 0.1835 | 0.1808 | 0.1822 | 0.1804 | 0.1666 | 0.1841 | 0.1929 | 0.2147 | 0.2014 |
| 0.1141 | 0.1103 | 0.1148 | 0.1035 | 0.1019 | 0.0962 | 0.101  | 0.0978 | 0.0971 |
| 0.1622 | 0.1585 | 0.1594 | 0.1731 | 0.159  | 0.1667 | 0.1732 | 0.171  | 0.1551 |
| 0.1801 | 0.1861 | 0.1882 | 0.1931 | 0.1756 | 0.1804 | 0.1717 | 0.1789 | 0.1688 |
| 0.1176 | 0.1197 | 0.1241 | 0.1206 | 0.1108 | 0.1183 | 0.1295 | 0.1239 | 0.1124 |
| 0.179  | 0.1843 | 0.1866 | 0.183  | 0.1907 | 0.1903 | 0.1933 | 0.214  | 0.1855 |
| 0.1305 | 0.1404 | 0.1461 | 0.1451 | 0.1273 | 0.1409 | 0.1474 | 0.1776 | 0.1443 |

|        |        |        |        |        |        |        |        |        |
|--------|--------|--------|--------|--------|--------|--------|--------|--------|
| 0.1341 | 0.1549 | 0.1548 | 0.1486 | 0.1536 | 0.1659 | 0.1793 | 0.208  | 0.1547 |
| 0.1722 | 0.181  | 0.1779 | 0.1767 | 0.1784 | 0.1821 | 0.1954 | 0.2309 | 0.1672 |
| 0.1685 | 0.1767 | 0.1873 | 0.2073 | 0.1958 | 0.2146 | 0.2223 | 0.257  | 0.179  |
| 0.1201 | 0.1251 | 0.1358 | 0.1348 | 0.1246 | 0.1323 | 0.1381 | 0.1652 | 0.1334 |
| 0.0553 | 0.0544 | 0.0515 | 0.051  | 0.0414 | 0.0405 | 0.0414 | 0.0431 | 0.0411 |
| 0.0189 | 0.0198 | 0.021  | 0.0195 | 0.017  | 0.0192 | 0.0162 | 0.0202 | 0.0208 |
| 0.0013 | 0.0016 | 0.0015 | 0.0018 | 0.0018 | 0.002  | 0.0022 | 0.0027 | 0.002  |
| 0.0031 | 0.0032 | 0.0031 | 0.0034 | 0.0031 | 0.0031 | 0.003  | 0.0033 | 0.0028 |
| 0.0186 | 0.0175 | 0.017  | 0.0169 | 0.0171 | 0.0171 | 0.0171 | 0.019  | 0.0177 |
| 0.0161 | 0.0168 | 0.0174 | 0.0186 | 0.0171 | 0.0182 | 0.0167 | 0.0185 | 0.0179 |
| 0.0067 | 0.0064 | 0.0067 | 0.0059 | 0.006  | 0.0057 | 0.0054 | 0.0054 | 0.0051 |
| 0.0245 | 0.0208 | 0.0192 | 0.0268 | 0.0178 | 0.0208 | 0.0199 | 0.0239 | 0.0203 |
| 0      | 0      | 0      | 0      | 0      | 0      | 0      | 0      | 0      |
| 0      | 0      | 0      | 0      | 0      | 0      | 0      | 0      | 0      |
| 0      | 0      | 0      | 0      | 0      | 0      | 0      | 0      | 0      |
| 0.0008 | 0.0008 | 0.0008 | 0.0008 | 0.0008 | 0.001  | 0.001  | 0.0013 | 0.0011 |
| 0.0006 | 0.0008 | 0.0008 | 0.0009 | 0.0009 | 0.0011 | 0.001  | 0.0012 | 0.0009 |
| 0.0013 | 0.0015 | 0.0015 | 0.0017 | 0.0017 | 0.0018 | 0.0019 | 0.0023 | 0.0017 |
| 0.004  | 0.0045 | 0.0043 | 0.0048 | 0.0047 | 0.0047 | 0.0048 | 0.0055 | 0.0046 |
| 0.0014 | 0.0013 | 0.0012 | 0.0013 | 0.0011 | 0.0011 | 0.0011 | 0.0011 | 0.0011 |
| 0.0008 | 0.0008 | 0.0008 | 0.0007 | 0.0007 | 0.0006 | 0.0006 | 0.0006 | 0.0006 |
| 0.0008 | 0.0007 | 0.0008 | 0.0007 | 0.0007 | 0.0007 | 0.0007 | 0.0007 | 0.0007 |
| 0.0073 | 0.0079 | 0.0084 | 0.0079 | 0.0074 | 0.0067 | 0.007  | 0.0068 | 0.0064 |
| 0      | 0      | 0      | 0      | 0      | 0      | 0      | 0      | 0      |
| 0.0107 | 0.0112 | 0.011  | 0.0102 | 0.0071 | 0.0086 | 0.0113 | 0.0117 | 0.0108 |
| 0.0172 | 0.0174 | 0.0184 | 0.0168 | 0.0144 | 0.0135 | 0.0121 | 0.0137 | 0.0143 |
| 0.1481 | 0.1254 | 0.1363 | 0.164  | 0.1222 | 0.1408 | 0.148  | 0.204  | 0.2006 |
| 0.0779 | 0.0892 | 0.081  | 0.0865 | 0.0757 | 0.0846 | 0.0885 | 0.1036 | 0.096  |
| 0.0965 | 0.1051 | 0.0989 | 0.0964 | 0.0863 | 0.0866 | 0.0834 | 0.1093 | 0.0857 |
| 0.1094 | 0.1106 | 0.1158 | 0.1285 | 0.1457 | 0.1577 | 0.1613 | 0.2037 | 0.1621 |
| 0.1994 | 0.2177 | 0.2196 | 0.229  | 0.2217 | 0.239  | 0.2417 | 0.2886 | 0.2381 |
| 0.1362 | 0.1428 | 0.14   | 0.1458 | 0.1343 | 0.1408 | 0.1412 | 0.1615 | 0.1422 |
| 0.1203 | 0.116  | 0.1248 | 0.1231 | 0.1177 | 0.1312 | 0.1329 | 0.1599 | 0.1207 |
| 0.1623 | 0.1647 | 0.167  | 0.164  | 0.1583 | 0.1538 | 0.1522 | 0.1594 | 0.1343 |
| 0.161  | 0.1629 | 0.1558 | 0.1479 | 0.1378 | 0.1378 | 0.1324 | 0.1312 | 0.1257 |
| 0.1348 | 0.1348 | 0.1311 | 0.1223 | 0.1196 | 0.131  | 0.1349 | 0.1443 | 0.1228 |
| 0.1106 | 0.1039 | 0.1136 | 0.1172 | 0.1113 | 0.109  | 0.11   | 0.1099 | 0.1084 |
| 0.1056 | 0.114  | 0.1132 | 0.1144 | 0.0963 | 0.1052 | 0.107  | 0.1133 | 0.1123 |
| 0.1565 | 0.1555 | 0.1508 | 0.1532 | 0.1413 | 0.129  | 0.1319 | 0.1348 | 0.1271 |
| 0.1788 | 0.1628 | 0.1635 | 0.1604 | 0.142  | 0.1446 | 0.1485 | 0.158  | 0.1473 |
| 0.1664 | 0.1625 | 0.1592 | 0.1589 | 0.1499 | 0.1484 | 0.1374 | 0.1501 | 0.1339 |
| 0.1744 | 0.1793 | 0.18   | 0.1755 | 0.1629 | 0.1627 | 0.1597 | 0.1741 | 0.1693 |
| 0.1591 | 0.1565 | 0.1569 | 0.1516 | 0.1378 | 0.1427 | 0.1431 | 0.1474 | 0.1426 |
| 0.1605 | 0.1731 | 0.1842 | 0.1776 | 0.1628 | 0.1683 | 0.16   | 0.1586 | 0.1402 |

|        |        |        |        |        |        |        |        |        |
|--------|--------|--------|--------|--------|--------|--------|--------|--------|
| 0.1757 | 0.1993 | 0.1996 | 0.1849 | 0.1537 | 0.1493 | 0.1575 | 0.1725 | 0.1755 |
| 0.2281 | 0.2488 | 0.2716 | 0.2807 | 0.2565 | 0.2687 | 0.248  | 0.2768 | 0.2913 |
| 0.1469 | 0.1451 | 0.139  | 0.1437 | 0.132  | 0.1345 | 0.1395 | 0.1476 | 0.1368 |
| 0.1398 | 0.1413 | 0.1423 | 0.1411 | 0.1392 | 0.1354 | 0.1301 | 0.1346 | 0.1159 |
| 0.1266 | 0.1207 | 0.1208 | 0.1202 | 0.1244 | 0.1097 | 0.1196 | 0.1458 | 0.1354 |
| 0.1574 | 0.167  | 0.1745 | 0.1779 | 0.1777 | 0.1802 | 0.1761 | 0.1947 | 0.1574 |
| 0.1327 | 0.1439 | 0.1511 | 0.1492 | 0.1529 | 0.1591 | 0.1592 | 0.1862 | 0.1484 |
| 0.1784 | 0.1754 | 0.178  | 0.1831 | 0.1833 | 0.1955 | 0.198  | 0.2299 | 0.1875 |
| 0.1439 | 0.1634 | 0.1594 | 0.1749 | 0.17   | 0.1887 | 0.2026 | 0.2245 | 0.1747 |
| 0.1678 | 0.194  | 0.1955 | 0.2041 | 0.1952 | 0.1996 | 0.2022 | 0.2276 | 0.174  |
| 0.0745 | 0.0743 | 0.0705 | 0.0762 | 0.0783 | 0.0806 | 0.086  | 0.0948 | 0.0755 |
| 0.0235 | 0.0261 | 0.0258 | 0.0248 | 0.0251 | 0.0264 | 0.0265 | 0.0325 | 0.0248 |
| 0.0542 | 0.065  | 0.0599 | 0.0705 | 0.0418 | 0.0526 | 0.0578 | 0.0643 | 0.059  |
| 0.0688 | 0.0908 | 0.0919 | 0.1028 | 0.1025 | 0.0973 | 0.0884 | 0.1005 | 0.0862 |
| 0.0887 | 0.0921 | 0.0858 | 0.0921 | 0.0887 | 0.0944 | 0.0989 | 0.1182 | 0.0977 |
| 0.1087 | 0.1152 | 0.1105 | 0.1136 | 0.1006 | 0.1172 | 0.1154 | 0.1395 | 0.1222 |
| 0.0564 | 0.0579 | 0.0545 | 0.058  | 0.0529 | 0.0561 | 0.05   | 0.0589 | 0.0532 |
| 0.0133 | 0.0119 | 0.0124 | 0.0113 | 0.0107 | 0.0102 | 0.01   | 0.0091 | 0.0101 |
| 0      | 0      | 0      | 0      | 0      | 0      | 0      | 0      | 0      |
| 0      | 0      | 0      | 0      | 0      | 0      | 0      | 0      | 0      |
| 0      | 0      | 0      | 0      | 0      | 0      | 0      | 0      | 0      |
| 0.0029 | 0.0029 | 0.0032 | 0.0033 | 0.0037 | 0.0042 | 0.0039 | 0.0048 | 0.0035 |
| 0.0048 | 0.0051 | 0.0052 | 0.0051 | 0.0051 | 0.0049 | 0.0052 | 0.0066 | 0.0051 |
| 0      | 0      | 0      | 0      | 0      | 0      | 0      | 0      | 0      |
| 0      | 0      | 0      | 0      | 0      | 0      | 0      | 0      | 0      |
| 0.0006 | 0.0006 | 0.0006 | 0.0006 | 0.0006 | 0.0006 | 0.0007 | 0.0006 | 0.0006 |
| 0.0015 | 0.0016 | 0.0015 | 0.0013 | 0.0013 | 0.0012 | 0.0013 | 0.0011 | 0.001  |
| 0.0027 | 0.0026 | 0.0023 | 0.0022 | 0.002  | 0.0021 | 0.0021 | 0.0022 | 0.0023 |
| 0.0482 | 0.0555 | 0.048  | 0.0532 | 0.044  | 0.0494 | 0.0483 | 0.0508 | 0.0526 |
| 0.0021 | 0.0022 | 0.0024 | 0.0021 | 0.0018 | 0.0018 | 0.0017 | 0.0019 | 0.0018 |
| 0.0205 | 0.0217 | 0.0233 | 0.0273 | 0.022  | 0.024  | 0.0228 | 0.0267 | 0.0198 |
| 0      | 0      | 0      | 0      | 0      | 0      | 0      | 0      | 0      |
| 0.2048 | 0.2755 | 0.329  | 0.4048 | 0.2986 | 0.3417 | 0.3433 | 0.385  | 0.3717 |
| 0.1509 | 0.1819 | 0.1653 | 0.1978 | 0.1452 | 0.1407 | 0.1065 | 0.1189 | 0.1121 |
| 0.1817 | 0.1802 | 0.188  | 0.1935 | 0.1785 | 0.1843 | 0.1766 | 0.2132 | 0.191  |
| 0.1546 | 0.1721 | 0.174  | 0.1697 | 0.1749 | 0.1867 | 0.1922 | 0.2336 | 0.1699 |
| 0.1491 | 0.1634 | 0.1566 | 0.162  | 0.1636 | 0.1718 | 0.1868 | 0.2164 | 0.1729 |
| 0.162  | 0.1608 | 0.1498 | 0.1521 | 0.1503 | 0.1439 | 0.1399 | 0.1499 | 0.1224 |
| 0.1112 | 0.1138 | 0.1156 | 0.1176 | 0.1185 | 0.1148 | 0.13   | 0.1504 | 0.116  |
| 0.1143 | 0.131  | 0.1416 | 0.1319 | 0.125  | 0.1404 | 0.1362 | 0.1603 | 0.1375 |
| 0.1365 | 0.1322 | 0.1366 | 0.1353 | 0.1338 | 0.1362 | 0.139  | 0.1573 | 0.1241 |
| 0.1107 | 0.1221 | 0.124  | 0.1176 | 0.1045 | 0.1036 | 0.1049 | 0.1303 | 0.098  |
| 0.1228 | 0.1209 | 0.1296 | 0.1249 | 0.1202 | 0.1215 | 0.1205 | 0.1361 | 0.1138 |
| 0.1255 | 0.1154 | 0.1099 | 0.1073 | 0.0906 | 0.0939 | 0.1031 | 0.1134 | 0.1026 |



|        |        |        |        |        |        |        |        |        |
|--------|--------|--------|--------|--------|--------|--------|--------|--------|
| 0.1262 | 0.1509 | 0.1483 | 0.1433 | 0.1427 | 0.134  | 0.1407 | 0.1453 | 0.1307 |
| 0.1689 | 0.1651 | 0.1587 | 0.1627 | 0.1622 | 0.1633 | 0.16   | 0.1671 | 0.1642 |
| 0.2167 | 0.2217 | 0.2125 | 0.221  | 0.1756 | 0.2013 | 0.2074 | 0.2362 | 0.2111 |
| 0.1947 | 0.2033 | 0.1945 | 0.2411 | 0.2148 | 0.1998 | 0.2158 | 0.229  | 0.2218 |
| 0.1151 | 0.119  | 0.1188 | 0.1111 | 0.0934 | 0.0976 | 0.1039 | 0.1078 | 0.0992 |
| 0.1462 | 0.1409 | 0.1405 | 0.1426 | 0.1398 | 0.1303 | 0.1318 | 0.1322 | 0.116  |
| 0.1525 | 0.16   | 0.1577 | 0.162  | 0.1515 | 0.1553 | 0.1605 | 0.1701 | 0.1607 |
| 0.1373 | 0.141  | 0.1406 | 0.1357 | 0.1264 | 0.1369 | 0.1349 | 0.1485 | 0.1303 |
| 0.1425 | 0.1505 | 0.1504 | 0.1483 | 0.1417 | 0.1438 | 0.1497 | 0.1711 | 0.1453 |
| 0.1501 | 0.1548 | 0.1552 | 0.1573 | 0.1484 | 0.1544 | 0.1556 | 0.1702 | 0.1458 |
| 0.1391 | 0.147  | 0.1439 | 0.1325 | 0.1328 | 0.1316 | 0.1402 | 0.1624 | 0.1445 |
| 0.1429 | 0.146  | 0.1441 | 0.1477 | 0.1377 | 0.1522 | 0.1658 | 0.1968 | 0.1497 |
| 0.1263 | 0.1334 | 0.1326 | 0.1392 | 0.1288 | 0.1338 | 0.1379 | 0.1662 | 0.1363 |
| 0.1598 | 0.1529 | 0.1587 | 0.1531 | 0.1531 | 0.1605 | 0.1651 | 0.1804 | 0.1488 |
| 0.1796 | 0.1952 | 0.1877 | 0.1807 | 0.1864 | 0.2053 | 0.2042 | 0.2248 | 0.1858 |
| 0.1662 | 0.1801 | 0.2136 | 0.2144 | 0.1901 | 0.2046 | 0.2151 | 0.2641 | 0.1952 |
| 0.1677 | 0.1675 | 0.1587 | 0.1729 | 0.1604 | 0.1695 | 0.1783 | 0.2179 | 0.1714 |
| 0.0639 | 0.0712 | 0.0691 | 0.0743 | 0.0745 | 0.0755 | 0.076  | 0.0971 | 0.079  |
| 0.1002 | 0.1034 | 0.1043 | 0.1113 | 0.1111 | 0.1178 | 0.1255 | 0.1427 | 0.1226 |
| 0.1155 | 0.1289 | 0.126  | 0.1415 | 0.1368 | 0.1452 | 0.1443 | 0.1727 | 0.1441 |
| 0.1314 | 0.1411 | 0.1391 | 0.147  | 0.133  | 0.1432 | 0.1473 | 0.1699 | 0.144  |
| 0.1399 | 0.1375 | 0.141  | 0.1581 | 0.1502 | 0.1576 | 0.1667 | 0.1766 | 0.1608 |
| 0.0517 | 0.0585 | 0.0671 | 0.079  | 0.0575 | 0.0675 | 0.0696 | 0.0764 | 0.0615 |
| 0      | 0      | 0      | 0      | 0      | 0      | 0      | 0      | 0      |
| 0      | 0      | 0      | 0      | 0      | 0      | 0      | 0      | 0      |
| 0      | 0      | 0      | 0      | 0      | 0      | 0      | 0      | 0      |
| 0      | 0      | 0      | 0      | 0      | 0      | 0      | 0      | 0      |
| 0.0052 | 0.0053 | 0.0056 | 0.0062 | 0.0064 | 0.0068 | 0.0076 | 0.0088 | 0.0069 |
| 0.0032 | 0.0031 | 0.0033 | 0.0032 | 0.0029 | 0.0034 | 0.0034 | 0.0039 | 0.0028 |
| 0      | 0      | 0      | 0      | 0      | 0      | 0      | 0      | 0      |
| 0      | 0      | 0      | 0      | 0      | 0      | 0      | 0      | 0      |
| 0.0019 | 0.0021 | 0.002  | 0.0021 | 0.0021 | 0.0024 | 0.0025 | 0.0029 | 0.0023 |
| 0.003  | 0.0029 | 0.003  | 0.0032 | 0.0032 | 0.0038 | 0.004  | 0.0047 | 0.0037 |
| 0.0039 | 0.0042 | 0.0044 | 0.0047 | 0.0047 | 0.005  | 0.0053 | 0.0065 | 0.0056 |
| 0.0059 | 0.0051 | 0.0052 | 0.0044 | 0.0046 | 0.0049 | 0.0045 | 0.0044 | 0.0041 |
| 0      | 0      | 0      | 0      | 0      | 0      | 0      | 0      | 0      |
| 0.0088 | 0.0091 | 0.0091 | 0.0137 | 0.0143 | 0.0156 | 0.0143 | 0.017  | 0.0166 |
| 0.0314 | 0.0315 | 0.0297 | 0.0284 | 0.0259 | 0.0276 | 0.0275 | 0.0268 | 0.0229 |
| 0.1328 | 0.1373 | 0.1306 | 0.1407 | 0.1288 | 0.1241 | 0.1317 | 0.153  | 0.1462 |
| 0.1051 | 0.1149 | 0.1401 | 0.1234 | 0.0983 | 0.1016 | 0.082  | 0.1361 | 0.1169 |
| 0.2556 | 0.2708 | 0.2521 | 0.2625 | 0.2654 | 0.2563 | 0.2598 | 0.3231 | 0.2976 |
| 0.2107 | 0.2343 | 0.2297 | 0.2309 | 0.24   | 0.2561 | 0.2601 | 0.3117 | 0.2389 |
| 0.1742 | 0.18   | 0.1683 | 0.1615 | 0.1539 | 0.1725 | 0.1696 | 0.2049 | 0.1768 |
| 0.141  | 0.1508 | 0.1418 | 0.1373 | 0.1337 | 0.1442 | 0.1441 | 0.1656 | 0.1424 |

|        |        |        |        |        |        |        |        |        |
|--------|--------|--------|--------|--------|--------|--------|--------|--------|
| 0.1147 | 0.1196 | 0.1239 | 0.1229 | 0.1319 | 0.1297 | 0.1224 | 0.137  | 0.1074 |
| 0.154  | 0.1523 | 0.1498 | 0.1458 | 0.1464 | 0.1539 | 0.1556 | 0.1865 | 0.1593 |
| 0.1275 | 0.1558 | 0.159  | 0.1648 | 0.1617 | 0.1751 | 0.1748 | 0.1995 | 0.1591 |
| 0.124  | 0.1327 | 0.1364 | 0.1313 | 0.1398 | 0.1503 | 0.1632 | 0.177  | 0.1428 |
| 0.1234 | 0.1297 | 0.1299 | 0.1259 | 0.1226 | 0.1287 | 0.1346 | 0.1472 | 0.1238 |
| 0.1557 | 0.1516 | 0.1395 | 0.1425 | 0.1383 | 0.1382 | 0.1373 | 0.1415 | 0.1477 |
| 0.1892 | 0.1969 | 0.1909 | 0.1848 | 0.1701 | 0.1733 | 0.1802 | 0.1967 | 0.1845 |
| 0.1539 | 0.1505 | 0.1477 | 0.1472 | 0.1334 | 0.1428 | 0.1565 | 0.1518 | 0.1546 |
| 0.2024 | 0.2187 | 0.2109 | 0.233  | 0.1963 | 0.2296 | 0.2297 | 0.2417 | 0.2441 |
| 0.2753 | 0.2915 | 0.3255 | 0.3704 | 0.3185 | 0.3173 | 0.2953 | 0.2984 | 0.3378 |
| 0.2406 | 0.236  | 0.2405 | 0.2318 | 0.2049 | 0.2122 | 0.2162 | 0.2496 | 0.2249 |
| 0.1369 | 0.1375 | 0.1404 | 0.1318 | 0.134  | 0.1331 | 0.1308 | 0.1483 | 0.1379 |
| 0.1283 | 0.1272 | 0.1332 | 0.1252 | 0.1243 | 0.1215 | 0.1235 | 0.1229 | 0.1153 |
| 0.1374 | 0.1351 | 0.1242 | 0.1238 | 0.1126 | 0.1257 | 0.1367 | 0.1528 | 0.1408 |
| 0.1496 | 0.1564 | 0.158  | 0.1517 | 0.1479 | 0.1557 | 0.1589 | 0.1722 | 0.1565 |
| 0.1055 | 0.1046 | 0.1035 | 0.1038 | 0.1084 | 0.1033 | 0.107  | 0.1169 | 0.1007 |
| 0.1526 | 0.1583 | 0.1577 | 0.1612 | 0.1537 | 0.1604 | 0.1649 | 0.1839 | 0.16   |
| 0.1341 | 0.1273 | 0.1294 | 0.1177 | 0.1172 | 0.1332 | 0.1404 | 0.1537 | 0.1237 |
| 0.1282 | 0.1403 | 0.1383 | 0.1378 | 0.1499 | 0.162  | 0.1711 | 0.192  | 0.1718 |
| 0.127  | 0.1246 | 0.133  | 0.1337 | 0.1256 | 0.1232 | 0.1192 | 0.1295 | 0.1206 |
| 0.1538 | 0.1703 | 0.1756 | 0.1872 | 0.1817 | 0.1904 | 0.1817 | 0.1866 | 0.1454 |
| 0.1769 | 0.1882 | 0.1961 | 0.1832 | 0.1706 | 0.1736 | 0.1842 | 0.2222 | 0.1635 |
| 0.1005 | 0.1153 | 0.1154 | 0.1173 | 0.1177 | 0.1186 | 0.1225 | 0.1432 | 0.1154 |
| 0.0432 | 0.0453 | 0.0455 | 0.0452 | 0.0428 | 0.0444 | 0.0461 | 0.0536 | 0.0454 |
| 0.0925 | 0.0959 | 0.0948 | 0.0991 | 0.0934 | 0.1001 | 0.0954 | 0.1084 | 0.0972 |
| 0.1394 | 0.1495 | 0.1452 | 0.1504 | 0.1382 | 0.1513 | 0.1458 | 0.1678 | 0.1419 |
| 0.1365 | 0.1431 | 0.1386 | 0.1374 | 0.1191 | 0.1242 | 0.1203 | 0.1555 | 0.1275 |
| 0.0788 | 0.0846 | 0.0856 | 0.0822 | 0.0773 | 0.0768 | 0.0691 | 0.0855 | 0.0891 |
| 0      | 0      | 0      | 0      | 0      | 0      | 0      | 0      | 0      |
| 0.0157 | 0.0159 | 0.0159 | 0.0169 | 0.0163 | 0.0167 | 0.0165 | 0.0187 | 0.0162 |
| 0      | 0      | 0      | 0      | 0      | 0      | 0      | 0      | 0      |
| 0      | 0      | 0      | 0      | 0      | 0      | 0      | 0      | 0      |
| 0      | 0      | 0      | 0      | 0      | 0      | 0      | 0      | 0      |
| 0.0025 | 0.0035 | 0.0036 | 0.0039 | 0.0039 | 0.0041 | 0.0047 | 0.0054 | 0.0039 |
| 0.0014 | 0.0013 | 0.0012 | 0.0012 | 0.0012 | 0.0011 | 0.0012 | 0.0011 | 0.0011 |
| 0.0017 | 0.0018 | 0.0019 | 0.0017 | 0.0015 | 0.0014 | 0.0013 | 0.0011 | 0.0012 |
| 0      | 0      | 0      | 0      | 0      | 0      | 0      | 0      | 0      |
| 0.0035 | 0.004  | 0.0041 | 0.004  | 0.0038 | 0.0042 | 0.0046 | 0.0048 | 0.0036 |
| 0.0015 | 0.0015 | 0.0017 | 0.0018 | 0.002  | 0.0023 | 0.0026 | 0.0028 | 0.0023 |
| 0.001  | 0.0011 | 0.0011 | 0.0012 | 0.0013 | 0.0012 | 0.0013 | 0.0014 | 0.0011 |
| 0.001  | 0.0011 | 0.0011 | 0.0011 | 0.001  | 0.0013 | 0.0013 | 0.0016 | 0.0012 |
| 0.0028 | 0.0028 | 0.0028 | 0.0027 | 0.0025 | 0.0026 | 0.0026 | 0.003  | 0.0024 |
| 0.0106 | 0.0105 | 0.011  | 0.0096 | 0.0098 | 0.01   | 0.0094 | 0.0089 | 0.0088 |
| 0.0633 | 0.0684 | 0.0624 | 0.0629 | 0.0532 | 0.0624 | 0.0707 | 0.0904 | 0.0786 |





|        |        |        |        |        |        |        |        |        |
|--------|--------|--------|--------|--------|--------|--------|--------|--------|
| 0      | 0      | 0      | 0      | 0      | 0      | 0      | 0      | 0      |
| 0.0008 | 0.0008 | 0.0008 | 0.0007 | 0.0006 | 0.0005 | 0.0006 | 0.0006 | 0.0005 |
| 0.0015 | 0.0015 | 0.0016 | 0.0014 | 0.0014 | 0.0012 | 0.0013 | 0.0014 | 0.0015 |
| 0.0037 | 0.0038 | 0.004  | 0.0043 | 0.0043 | 0.0047 | 0.0044 | 0.0049 | 0.0038 |
| 0.0041 | 0.0043 | 0.0047 | 0.005  | 0.0046 | 0.0049 | 0.0052 | 0.0061 | 0.0048 |
| 0.0007 | 0.0007 | 0.0007 | 0.0007 | 0.0007 | 0.0007 | 0.0008 | 0.0008 | 0.0007 |
| 0.0109 | 0.0107 | 0.011  | 0.0105 | 0.0106 | 0.0106 | 0.0108 | 0.0121 | 0.0105 |
| 0.0399 | 0.037  | 0.0412 | 0.039  | 0.0373 | 0.0395 | 0.0392 | 0.045  | 0.0371 |
| 0.0173 | 0.0178 | 0.0171 | 0.0192 | 0.0185 | 0.018  | 0.0176 | 0.0205 | 0.0184 |
| 0.0007 | 0.0007 | 0.0007 | 0.0007 | 0.0007 | 0.0007 | 0.0007 | 0.0007 | 0.0006 |
| 0.0034 | 0.0036 | 0.0035 | 0.0037 | 0.0037 | 0.0042 | 0.0042 | 0.0051 | 0.0038 |
| 0.0261 | 0.0264 | 0.0272 | 0.0289 | 0.0284 | 0.0299 | 0.0336 | 0.0385 | 0.0291 |
| 0.1455 | 0.156  | 0.1577 | 0.1653 | 0.1601 | 0.1717 | 0.1748 | 0.2003 | 0.1657 |
| 0.1017 | 0.1057 | 0.1076 | 0.1183 | 0.1227 | 0.1311 | 0.1257 | 0.1591 | 0.1257 |
| 0.1476 | 0.1634 | 0.1766 | 0.1768 | 0.1706 | 0.181  | 0.1884 | 0.221  | 0.1649 |
| 0.2138 | 0.2324 | 0.2387 | 0.2488 | 0.2363 | 0.254  | 0.2596 | 0.313  | 0.2381 |
| 0.1448 | 0.149  | 0.1503 | 0.14   | 0.1468 | 0.1662 | 0.1696 | 0.1987 | 0.154  |
| 0.1484 | 0.162  | 0.1638 | 0.1699 | 0.17   | 0.1859 | 0.1783 | 0.226  | 0.1753 |
| 0.2065 | 0.2215 | 0.2112 | 0.1938 | 0.2036 | 0.2126 | 0.2196 | 0.2769 | 0.204  |
| 0.1397 | 0.1502 | 0.1564 | 0.1625 | 0.1668 | 0.1815 | 0.2008 | 0.2348 | 0.1826 |
| 0.1112 | 0.1159 | 0.1166 | 0.1059 | 0.1121 | 0.1081 | 0.1117 | 0.1379 | 0.1064 |
| 0.1459 | 0.1391 | 0.1458 | 0.1416 | 0.1536 | 0.174  | 0.1995 | 0.2382 | 0.188  |
| 0.1581 | 0.1658 | 0.1776 | 0.1735 | 0.1683 | 0.164  | 0.1677 | 0.1831 | 0.1358 |
| 0.1306 | 0.1322 | 0.1359 | 0.1361 | 0.1315 | 0.1337 | 0.1312 | 0.1467 | 0.1319 |
| 0.1293 | 0.1345 | 0.1423 | 0.134  | 0.1324 | 0.1388 | 0.1384 | 0.1637 | 0.1298 |
| 0.1366 | 0.1388 | 0.1461 | 0.1362 | 0.1409 | 0.1431 | 0.1425 | 0.1605 | 0.1307 |
| 0.1432 | 0.1459 | 0.152  | 0.151  | 0.152  | 0.1605 | 0.1715 | 0.182  | 0.1484 |
| 0.1322 | 0.1341 | 0.1394 | 0.1348 | 0.1332 | 0.1421 | 0.1473 | 0.1607 | 0.1344 |
| 0.1748 | 0.181  | 0.1792 | 0.1783 | 0.1719 | 0.1804 | 0.1842 | 0.1999 | 0.1791 |
| 0.1394 | 0.1439 | 0.139  | 0.1464 | 0.1316 | 0.1391 | 0.1462 | 0.1664 | 0.141  |
| 0.1309 | 0.1226 | 0.1207 | 0.1075 | 0.0943 | 0.0949 | 0.0975 | 0.092  | 0.0905 |
| 0.1515 | 0.1588 | 0.1518 | 0.1468 | 0.1392 | 0.133  | 0.1355 | 0.1495 | 0.1364 |
| 0.147  | 0.1528 | 0.1552 | 0.1515 | 0.1461 | 0.1361 | 0.1334 | 0.1422 | 0.1129 |
| 0.1505 | 0.1608 | 0.1593 | 0.1606 | 0.1525 | 0.1576 | 0.1655 | 0.1867 | 0.1572 |
| 0.1239 | 0.1397 | 0.1466 | 0.1544 | 0.157  | 0.1601 | 0.1681 | 0.1913 | 0.1658 |
| 0.153  | 0.1658 | 0.1617 | 0.1718 | 0.1615 | 0.174  | 0.1726 | 0.2142 | 0.1775 |
| 0.1715 | 0.1885 | 0.1817 | 0.2209 | 0.2146 | 0.201  | 0.2126 | 0.2363 | 0.1902 |
| 0.2162 | 0.2128 | 0.2227 | 0.2265 | 0.2021 | 0.1967 | 0.1972 | 0.2251 | 0.1971 |
| 0.1742 | 0.1644 | 0.1668 | 0.1506 | 0.1449 | 0.1325 | 0.138  | 0.1216 | 0.1199 |
| 0.1357 | 0.131  | 0.1308 | 0.1217 | 0.1234 | 0.1267 | 0.1132 | 0.1245 | 0.0986 |
| 0.1204 | 0.1243 | 0.1259 | 0.123  | 0.1252 | 0.1329 | 0.1477 | 0.1671 | 0.1434 |
| 0.1418 | 0.1454 | 0.143  | 0.1425 | 0.1533 | 0.1544 | 0.1627 | 0.1796 | 0.1529 |
| 0.2123 | 0.2238 | 0.209  | 0.2215 | 0.1951 | 0.212  | 0.2309 | 0.275  | 0.2615 |
| 0.2291 | 0.2379 | 0.2153 | 0.2298 | 0.2039 | 0.2381 | 0.2552 | 0.2936 | 0.275  |

|        |        |        |        |        |        |        |        |        |
|--------|--------|--------|--------|--------|--------|--------|--------|--------|
| 0.1235 | 0.115  | 0.1095 | 0.1346 | 0.1236 | 0.1253 | 0.1357 | 0.1609 | 0.134  |
| 0.0609 | 0.0946 | 0.0884 | 0.1236 | 0.1168 | 0.1281 | 0.1253 | 0.1359 | 0.1183 |
| 0.0828 | 0.0879 | 0.0851 | 0.0967 | 0.0917 | 0.1029 | 0.0851 | 0.1108 | 0.1054 |
| 0.0132 | 0.0129 | 0.0117 | 0.0127 | 0.0126 | 0.0149 | 0.0161 | 0.0196 | 0.0142 |
| 0      | 0      | 0      | 0      | 0      | 0      | 0      | 0      | 0      |
| 0      | 0      | 0      | 0      | 0      | 0      | 0      | 0      | 0      |
| 0.0037 | 0.0038 | 0.0038 | 0.0038 | 0.0041 | 0.0042 | 0.0042 | 0.005  | 0.0038 |
| 0.0007 | 0.0007 | 0.0007 | 0.0006 | 0.0006 | 0.0005 | 0.0005 | 0.0005 | 0.0005 |
| 0      | 0      | 0      | 0      | 0      | 0      | 0      | 0      | 0      |
| 0.0021 | 0.0022 | 0.0023 | 0.0023 | 0.0022 | 0.0024 | 0.0026 | 0.0032 | 0.0026 |
| 0      | 0      | 0      | 0      | 0      | 0      | 0      | 0      | 0      |
| 0.0046 | 0.0046 | 0.0047 | 0.0044 | 0.0041 | 0.0038 | 0.004  | 0.0037 | 0.0034 |
| 0.0309 | 0.032  | 0.0312 | 0.0318 | 0.0314 | 0.0328 | 0.036  | 0.0421 | 0.0341 |
| 0.0724 | 0.0761 | 0.077  | 0.0772 | 0.0813 | 0.0852 | 0.0878 | 0.0969 | 0.0763 |
| 0.0158 | 0.017  | 0.0171 | 0.0186 | 0.0173 | 0.0179 | 0.017  | 0.0198 | 0.0162 |
| 0.0142 | 0.016  | 0.014  | 0.0153 | 0.0147 | 0.0161 | 0.0166 | 0.0185 | 0.017  |
| 0.096  | 0.1074 | 0.1046 | 0.1092 | 0.1044 | 0.1097 | 0.1145 | 0.1335 | 0.1066 |
| 0.0815 | 0.0885 | 0.0996 | 0.1063 | 0.106  | 0.1064 | 0.1078 | 0.1244 | 0.0978 |
| 0.1495 | 0.1401 | 0.1584 | 0.1573 | 0.1591 | 0.1549 | 0.1616 | 0.1954 | 0.1399 |
| 0.1231 | 0.1381 | 0.1731 | 0.1778 | 0.2005 | 0.2044 | 0.1987 | 0.2497 | 0.1873 |
| 0.2271 | 0.2379 | 0.2399 | 0.2343 | 0.2264 | 0.2479 | 0.2604 | 0.31   | 0.2321 |
| 0.1376 | 0.1411 | 0.1467 | 0.1522 | 0.152  | 0.1461 | 0.1415 | 0.1907 | 0.1362 |
| 0.1655 | 0.1739 | 0.1722 | 0.1668 | 0.1644 | 0.18   | 0.1845 | 0.2343 | 0.179  |
| 0.1607 | 0.168  | 0.1652 | 0.1554 | 0.1603 | 0.168  | 0.1725 | 0.1977 | 0.1561 |
| 0.1238 | 0.1266 | 0.1358 | 0.1382 | 0.1379 | 0.1516 | 0.1563 | 0.1794 | 0.1372 |
| 0.1848 | 0.1891 | 0.189  | 0.1855 | 0.2033 | 0.2221 | 0.2358 | 0.2823 | 0.2183 |
| 0.1567 | 0.1523 | 0.1696 | 0.1674 | 0.1563 | 0.1808 | 0.1717 | 0.227  | 0.1768 |
| 0.1344 | 0.1347 | 0.1349 | 0.1374 | 0.1253 | 0.1349 | 0.1326 | 0.1547 | 0.1338 |
| 0.1654 | 0.165  | 0.1588 | 0.1546 | 0.156  | 0.153  | 0.1465 | 0.1433 | 0.1358 |
| 0.1857 | 0.1886 | 0.1848 | 0.184  | 0.1628 | 0.1598 | 0.1663 | 0.1631 | 0.1484 |
| 0.1644 | 0.1599 | 0.1631 | 0.1578 | 0.1456 | 0.1507 | 0.1478 | 0.1516 | 0.1462 |
| 0.1451 | 0.139  | 0.1283 | 0.1159 | 0.1141 | 0.1157 | 0.1303 | 0.1293 | 0.1274 |
| 0.1724 | 0.1723 | 0.1757 | 0.166  | 0.1645 | 0.1627 | 0.163  | 0.1711 | 0.1609 |
| 0.1401 | 0.1406 | 0.1472 | 0.1433 | 0.1449 | 0.1387 | 0.1436 | 0.1474 | 0.1367 |
| 0.1063 | 0.1089 | 0.1011 | 0.1016 | 0.0916 | 0.0961 | 0.1055 | 0.1187 | 0.115  |
| 0.1319 | 0.1338 | 0.1252 | 0.12   | 0.1176 | 0.1163 | 0.1217 | 0.1388 | 0.1198 |
| 0.1461 | 0.1432 | 0.1496 | 0.1448 | 0.1487 | 0.1542 | 0.1588 | 0.157  | 0.1317 |
| 0.1068 | 0.1038 | 0.103  | 0.0997 | 0.1021 | 0.1068 | 0.1052 | 0.1181 | 0.0988 |
| 0.1346 | 0.1332 | 0.1348 | 0.126  | 0.1146 | 0.1202 | 0.131  | 0.1542 | 0.1186 |
| 0.1776 | 0.1803 | 0.1863 | 0.1928 | 0.1883 | 0.1982 | 0.1968 | 0.2283 | 0.1838 |
| 0.1467 | 0.1589 | 0.1648 | 0.1753 | 0.1748 | 0.1969 | 0.198  | 0.2231 | 0.181  |
| 0.0748 | 0.0798 | 0.079  | 0.0799 | 0.0747 | 0.0764 | 0.081  | 0.0938 | 0.0814 |
| 0.2701 | 0.3055 | 0.2611 | 0.2472 | 0.2507 | 0.2709 | 0.2792 | 0.3543 | 0.3012 |
| 0.3385 | 0.3357 | 0.3137 | 0.3184 | 0.278  | 0.2946 | 0.2771 | 0.3793 | 0.3296 |

|        |        |        |        |        |        |        |        |        |
|--------|--------|--------|--------|--------|--------|--------|--------|--------|
| 0.1299 | 0.1325 | 0.1287 | 0.1204 | 0.1149 | 0.1157 | 0.1224 | 0.123  | 0.1164 |
| 0.1904 | 0.1851 | 0.1775 | 0.1767 | 0.1627 | 0.1735 | 0.17   | 0.1804 | 0.172  |
| 0.162  | 0.1686 | 0.1672 | 0.1652 | 0.1547 | 0.1542 | 0.1604 | 0.1845 | 0.1615 |
| 0.1824 | 0.1877 | 0.1785 | 0.1675 | 0.1681 | 0.1807 | 0.1836 | 0.2184 | 0.1827 |
| 0.1279 | 0.1435 | 0.1478 | 0.1589 | 0.1534 | 0.1684 | 0.1676 | 0.2056 | 0.1664 |
| 0.1187 | 0.1241 | 0.1186 | 0.1257 | 0.1195 | 0.1311 | 0.1335 | 0.1658 | 0.1387 |
| 0.0655 | 0.0727 | 0.0708 | 0.0798 | 0.0699 | 0.077  | 0.0831 | 0.1057 | 0.0985 |
| 0.0508 | 0.053  | 0.0577 | 0.0659 | 0.0589 | 0.0622 | 0.0556 | 0.0648 | 0.0611 |
| 0.0017 | 0.002  | 0.0018 | 0.0021 | 0.0022 | 0.0024 | 0.0026 | 0.0032 | 0.0032 |
| 0.0072 | 0.0072 | 0.007  | 0.007  | 0.0064 | 0.0063 | 0.0062 | 0.0064 | 0.0063 |
| 0      | 0      | 0      | 0      | 0      | 0      | 0      | 0      | 0      |
| 0      | 0      | 0      | 0      | 0      | 0      | 0      | 0      | 0      |
| 0.007  | 0.0065 | 0.0073 | 0.0071 | 0.0069 | 0.0069 | 0.0066 | 0.008  | 0.0068 |
| 0.0007 | 0.0007 | 0.0007 | 0.0007 | 0.0006 | 0.0006 | 0.0006 | 0.0007 | 0.0006 |
| 0.0011 | 0.0014 | 0.0013 | 0.0015 | 0.0009 | 0.0008 | 0.001  | 0.0013 | 0.0014 |
| 0.0087 | 0.0094 | 0.0089 | 0.0092 | 0.009  | 0.0103 | 0.0105 | 0.0128 | 0.0111 |
| 0.0131 | 0.0136 | 0.0139 | 0.0142 | 0.0135 | 0.0136 | 0.014  | 0.0163 | 0.014  |
| 0.0469 | 0.0487 | 0.0476 | 0.0495 | 0.0473 | 0.0506 | 0.0514 | 0.0596 | 0.0515 |
| 0.0465 | 0.0479 | 0.049  | 0.0483 | 0.0469 | 0.0509 | 0.0534 | 0.0647 | 0.054  |
| 0.0157 | 0.0169 | 0.0178 | 0.0164 | 0.0155 | 0.017  | 0.0197 | 0.0238 | 0.0158 |
| 0.0559 | 0.0594 | 0.0593 | 0.0574 | 0.051  | 0.0526 | 0.0549 | 0.0689 | 0.0559 |
| 0.0418 | 0.0482 | 0.0484 | 0.049  | 0.0465 | 0.0507 | 0.0489 | 0.0637 | 0.0475 |
| 0.0876 | 0.0886 | 0.091  | 0.096  | 0.0879 | 0.0911 | 0.093  | 0.1055 | 0.09   |
| 0.1454 | 0.1556 | 0.1634 | 0.1505 | 0.1617 | 0.1781 | 0.1811 | 0.198  | 0.1629 |
| 0.1473 | 0.1524 | 0.1489 | 0.1547 | 0.1456 | 0.1565 | 0.1634 | 0.196  | 0.1661 |
| 0.1497 | 0.1741 | 0.1691 | 0.1698 | 0.1602 | 0.1746 | 0.1804 | 0.2179 | 0.1791 |
| 0.1498 | 0.1539 | 0.1567 | 0.1669 | 0.1638 | 0.171  | 0.1861 | 0.2169 | 0.1725 |
| 0.1342 | 0.1431 | 0.1341 | 0.1406 | 0.1354 | 0.1567 | 0.1586 | 0.2058 | 0.1698 |
| 0.142  | 0.1549 | 0.1467 | 0.1352 | 0.1403 | 0.1579 | 0.1691 | 0.1868 | 0.1572 |
| 0.1466 | 0.1516 | 0.1459 | 0.1405 | 0.1278 | 0.1338 | 0.1343 | 0.1472 | 0.1343 |
| 0.1401 | 0.1384 | 0.144  | 0.1347 | 0.1226 | 0.1219 | 0.1268 | 0.1294 | 0.1171 |
| 0.1264 | 0.1259 | 0.127  | 0.1247 | 0.1189 | 0.1352 | 0.1405 | 0.1606 | 0.1316 |
| 0.149  | 0.163  | 0.1671 | 0.1723 | 0.183  | 0.1844 | 0.192  | 0.2231 | 0.1777 |
| 0.1442 | 0.1528 | 0.1636 | 0.153  | 0.1479 | 0.1588 | 0.1698 | 0.1846 | 0.1542 |
| 0.1555 | 0.1511 | 0.1574 | 0.1459 | 0.1432 | 0.14   | 0.1434 | 0.1385 | 0.1339 |
| 0.117  | 0.1195 | 0.1269 | 0.1184 | 0.1138 | 0.1098 | 0.1068 | 0.1129 | 0.1041 |
| 0.1794 | 0.1824 | 0.1766 | 0.1811 | 0.1718 | 0.1774 | 0.188  | 0.1958 | 0.1708 |
| 0.1218 | 0.1216 | 0.1267 | 0.1227 | 0.1206 | 0.143  | 0.1436 | 0.1418 | 0.1294 |
| 0.1802 | 0.1822 | 0.1667 | 0.1581 | 0.1532 | 0.1553 | 0.1647 | 0.1776 | 0.1693 |
| 0.1452 | 0.1467 | 0.1373 | 0.1318 | 0.1184 | 0.1182 | 0.12   | 0.1265 | 0.1187 |
| 0.2189 | 0.2386 | 0.2358 | 0.255  | 0.2172 | 0.2292 | 0.2549 | 0.304  | 0.2835 |
| 0.1808 | 0.1807 | 0.1799 | 0.1693 | 0.1564 | 0.1513 | 0.1496 | 0.1582 | 0.1469 |
| 0.1143 | 0.1214 | 0.127  | 0.1277 | 0.1264 | 0.1313 | 0.1349 | 0.1542 | 0.1293 |
| 0.1544 | 0.1555 | 0.1512 | 0.1502 | 0.1449 | 0.1519 | 0.1546 | 0.1806 | 0.1512 |

|        |        |        |        |        |        |        |        |        |
|--------|--------|--------|--------|--------|--------|--------|--------|--------|
| 0.1244 | 0.1272 | 0.124  | 0.1211 | 0.1124 | 0.122  | 0.1273 | 0.1368 | 0.1212 |
| 0.1474 | 0.1419 | 0.1465 | 0.1479 | 0.1415 | 0.1455 | 0.1389 | 0.1535 | 0.1367 |
| 0.1458 | 0.1499 | 0.1505 | 0.1553 | 0.1508 | 0.1594 | 0.1659 | 0.1892 | 0.1631 |
| 0.1048 | 0.1044 | 0.102  | 0.1007 | 0.0942 | 0.0963 | 0.0993 | 0.1057 | 0.0977 |
| 0.1642 | 0.1778 | 0.1686 | 0.1605 | 0.1405 | 0.1473 | 0.1539 | 0.1639 | 0.1558 |
| 0.2192 | 0.2266 | 0.2085 | 0.2288 | 0.2004 | 0.2182 | 0.2087 | 0.2215 | 0.2203 |
| 0.139  | 0.1412 | 0.1395 | 0.1418 | 0.1322 | 0.1389 | 0.1393 | 0.1469 | 0.1304 |
| 0.174  | 0.1747 | 0.1817 | 0.1821 | 0.1681 | 0.1581 | 0.1556 | 0.1563 | 0.1402 |
| 0.1895 | 0.1852 | 0.1876 | 0.1858 | 0.1768 | 0.1894 | 0.1859 | 0.186  | 0.1676 |
| 0.1253 | 0.131  | 0.1274 | 0.1266 | 0.119  | 0.1315 | 0.131  | 0.1545 | 0.1292 |
| 0.2051 | 0.2205 | 0.2212 | 0.2335 | 0.2226 | 0.2219 | 0.2356 | 0.2781 | 0.2169 |
| 0.0945 | 0.0928 | 0.0911 | 0.0893 | 0.0986 | 0.1183 | 0.1193 | 0.1572 | 0.1113 |
| 0.0515 | 0.0515 | 0.0529 | 0.0549 | 0.0529 | 0.0522 | 0.0481 | 0.055  | 0.0491 |
| 0.1465 | 0.1553 | 0.1501 | 0.1778 | 0.1704 | 0.1748 | 0.1575 | 0.1968 | 0.1848 |
| 0.0258 | 0.0277 | 0.0306 | 0.0346 | 0.0284 | 0.0312 | 0.0259 | 0.0386 | 0.0307 |
| 0.0159 | 0.0174 | 0.0182 | 0.0209 | 0.0183 | 0.0173 | 0.0177 | 0.0235 | 0.0221 |
| 0      | 0      | 0      | 0      | 0      | 0      | 0      | 0      | 0      |
| 0      | 0      | 0      | 0      | 0      | 0      | 0      | 0      | 0      |
| 0.0065 | 0.0085 | 0.0064 | 0.0075 | 0.0055 | 0.0087 | 0.0104 | 0.0119 | 0.0112 |
| 0.0078 | 0.0078 | 0.0078 | 0.0084 | 0.0081 | 0.0106 | 0.0114 | 0.0133 | 0.0125 |
| 0.0045 | 0.005  | 0.0051 | 0.0048 | 0.0048 | 0.0055 | 0.0061 | 0.0068 | 0.0054 |
| 0      | 0      | 0      | 0      | 0      | 0      | 0      | 0      | 0      |
| 0.0081 | 0.0081 | 0.008  | 0.0064 | 0.0066 | 0.0066 | 0.0065 | 0.0066 | 0.0057 |
| 0.0728 | 0.0784 | 0.0772 | 0.0827 | 0.0786 | 0.0867 | 0.0851 | 0.1057 | 0.0892 |
| 0.0957 | 0.1008 | 0.1055 | 0.1155 | 0.1081 | 0.1157 | 0.1158 | 0.1324 | 0.1226 |
| 0.033  | 0.036  | 0.0313 | 0.037  | 0.0314 | 0.0318 | 0.0295 | 0.0377 | 0.0348 |
| 0.0587 | 0.0655 | 0.0636 | 0.0673 | 0.0686 | 0.0686 | 0.0773 | 0.0885 | 0.0724 |
| 0.0574 | 0.0602 | 0.0589 | 0.0539 | 0.0542 | 0.0564 | 0.0571 | 0.0694 | 0.0585 |
| 0.1229 | 0.13   | 0.1287 | 0.1197 | 0.1136 | 0.1216 | 0.1242 | 0.1412 | 0.1091 |
| 0.1277 | 0.1406 | 0.1462 | 0.1531 | 0.1442 | 0.1572 | 0.1519 | 0.1912 | 0.1544 |
| 0.1599 | 0.1675 | 0.165  | 0.1703 | 0.1654 | 0.1714 | 0.1734 | 0.1901 | 0.1607 |
| 0.1546 | 0.1486 | 0.169  | 0.1677 | 0.1593 | 0.1605 | 0.162  | 0.1682 | 0.146  |
| 0.1453 | 0.1499 | 0.1585 | 0.1468 | 0.1434 | 0.1446 | 0.1548 | 0.1568 | 0.1508 |
| 0.1331 | 0.132  | 0.1378 | 0.1296 | 0.1259 | 0.1305 | 0.1394 | 0.139  | 0.1258 |
| 0.1457 | 0.1543 | 0.1524 | 0.1655 | 0.1578 | 0.1701 | 0.159  | 0.1662 | 0.1496 |
| 0.2606 | 0.2671 | 0.2712 | 0.277  | 0.23   | 0.2444 | 0.2478 | 0.2775 | 0.258  |
| 0.2005 | 0.1928 | 0.1864 | 0.1796 | 0.1718 | 0.1685 | 0.1629 | 0.1657 | 0.1468 |
| 0.1343 | 0.1281 | 0.1444 | 0.1273 | 0.1233 | 0.1131 | 0.1173 | 0.1224 | 0.1156 |
| 0.1437 | 0.1543 | 0.1508 | 0.1339 | 0.1225 | 0.1273 | 0.1315 | 0.1412 | 0.1239 |
| 0.1082 | 0.1152 | 0.1257 | 0.1201 | 0.1199 | 0.1211 | 0.1386 | 0.1565 | 0.1395 |
| 0.1327 | 0.1325 | 0.1346 | 0.1347 | 0.1387 | 0.1427 | 0.1597 | 0.1699 | 0.1367 |
| 0.1828 | 0.1894 | 0.1886 | 0.169  | 0.1578 | 0.1531 | 0.1569 | 0.1628 | 0.1553 |
| 0.1509 | 0.1576 | 0.1461 | 0.142  | 0.1363 | 0.1372 | 0.1461 | 0.1384 | 0.1371 |
| 0.1431 | 0.1326 | 0.1271 | 0.1226 | 0.115  | 0.1195 | 0.1181 | 0.1405 | 0.1294 |



|        |        |        |        |        |        |        |        |        |
|--------|--------|--------|--------|--------|--------|--------|--------|--------|
| 0.1566 | 0.1644 | 0.156  | 0.1589 | 0.1476 | 0.1506 | 0.1567 | 0.1752 | 0.1622 |
| 0.0988 | 0.0979 | 0.1103 | 0.1016 | 0.0974 | 0.0942 | 0.1062 | 0.1121 | 0.1032 |
| 0.1826 | 0.1785 | 0.1773 | 0.1677 | 0.1528 | 0.1581 | 0.1658 | 0.1733 | 0.1558 |
| 0.1515 | 0.1509 | 0.1402 | 0.1351 | 0.1329 | 0.1331 | 0.1393 | 0.1363 | 0.1059 |
| 0.1204 | 0.1279 | 0.1292 | 0.131  | 0.1312 | 0.1401 | 0.1416 | 0.1698 | 0.1383 |
| 0.1542 | 0.1593 | 0.1546 | 0.1666 | 0.1511 | 0.1642 | 0.1643 | 0.176  | 0.1503 |
| 0.1467 | 0.1557 | 0.1497 | 0.1516 | 0.1423 | 0.1477 | 0.1383 | 0.1499 | 0.1356 |
| 0.1479 | 0.15   | 0.1505 | 0.1369 | 0.129  | 0.1292 | 0.1331 | 0.1384 | 0.1226 |
| 0.1516 | 0.1597 | 0.1585 | 0.1576 | 0.1515 | 0.1622 | 0.1672 | 0.1938 | 0.1637 |
| 0.1233 | 0.1325 | 0.1313 | 0.1348 | 0.1246 | 0.1303 | 0.1312 | 0.1515 | 0.1329 |
| 0.1314 | 0.1359 | 0.1381 | 0.1397 | 0.134  | 0.1395 | 0.134  | 0.1433 | 0.1256 |
| 0.1805 | 0.183  | 0.1879 | 0.1811 | 0.1727 | 0.1695 | 0.1723 | 0.1853 | 0.1644 |
| 0.1862 | 0.1885 | 0.1824 | 0.1829 | 0.1711 | 0.1829 | 0.1724 | 0.185  | 0.162  |
| 0.1224 | 0.1259 | 0.1186 | 0.1111 | 0.1061 | 0.1005 | 0.0942 | 0.0987 | 0.0928 |
| 0.1471 | 0.1406 | 0.1491 | 0.1368 | 0.1377 | 0.1356 | 0.1315 | 0.1241 | 0.119  |
| 0.1934 | 0.2158 | 0.2207 | 0.221  | 0.1974 | 0.2015 | 0.194  | 0.2246 | 0.2214 |
| 0.1829 | 0.2044 | 0.2187 | 0.2283 | 0.21   | 0.2312 | 0.226  | 0.2656 | 0.2288 |
| 0.1766 | 0.1863 | 0.1791 | 0.1851 | 0.1775 | 0.1902 | 0.1928 | 0.2325 | 0.1918 |
| 0.1069 | 0.1117 | 0.1078 | 0.1118 | 0.114  | 0.1266 | 0.1254 | 0.1329 | 0.1161 |
| 0.1274 | 0.1302 | 0.1365 | 0.1633 | 0.1419 | 0.143  | 0.1398 | 0.1598 | 0.141  |
| 0.0636 | 0.0721 | 0.0682 | 0.0712 | 0.0662 | 0.0738 | 0.0679 | 0.0774 | 0.072  |
| 0.0044 | 0.0039 | 0.0037 | 0.0035 | 0.0033 | 0.0033 | 0.0031 | 0.0031 | 0.0029 |
| 0      | 0      | 0      | 0      | 0      | 0      | 0      | 0      | 0      |
| 0      | 0      | 0      | 0      | 0      | 0      | 0      | 0      | 0      |
| 0      | 0      | 0      | 0      | 0      | 0      | 0      | 0      | 0      |
| 0.0031 | 0.0035 | 0.0036 | 0.0035 | 0.0034 | 0.0037 | 0.0038 | 0.0047 | 0.0037 |
| 0.0066 | 0.0072 | 0.0071 | 0.0071 | 0.0068 | 0.0072 | 0.0071 | 0.0086 | 0.0073 |
| 0.0044 | 0.0044 | 0.0035 | 0.0053 | 0.004  | 0.0054 | 0.0045 | 0.0059 | 0.0055 |
| 0.0067 | 0.0065 | 0.0062 | 0.0062 | 0.0063 | 0.0061 | 0.0061 | 0.0067 | 0.0063 |
| 0.0255 | 0.0269 | 0.0263 | 0.026  | 0.0247 | 0.0267 | 0.0267 | 0.0305 | 0.0254 |
| 0.0372 | 0.0387 | 0.0387 | 0.0402 | 0.0363 | 0.0394 | 0.0411 | 0.0491 | 0.0417 |
| 0.0046 | 0.0046 | 0.0043 | 0.0045 | 0.0041 | 0.0044 | 0.0044 | 0.0052 | 0.0044 |
| 0.0977 | 0.1056 | 0.1067 | 0.1128 | 0.1101 | 0.1163 | 0.1178 | 0.1382 | 0.1142 |
| 0.0332 | 0.037  | 0.0415 | 0.0435 | 0.0461 | 0.0479 | 0.0522 | 0.0603 | 0.0488 |
| 0.0819 | 0.0857 | 0.0892 | 0.0929 | 0.0943 | 0.1013 | 0.1016 | 0.1194 | 0.0926 |
| 0.1541 | 0.1578 | 0.1545 | 0.1738 | 0.1613 | 0.1785 | 0.1856 | 0.2173 | 0.1811 |
| 0.2003 | 0.2039 | 0.2016 | 0.1965 | 0.1939 | 0.1963 | 0.1942 | 0.2294 | 0.1996 |
| 0.111  | 0.1244 | 0.1477 | 0.1392 | 0.1334 | 0.1289 | 0.1298 | 0.139  | 0.1266 |
| 0.1489 | 0.1513 | 0.1426 | 0.1367 | 0.1307 | 0.1252 | 0.1314 | 0.148  | 0.1438 |
| 0.1434 | 0.1422 | 0.1575 | 0.1473 | 0.1344 | 0.1316 | 0.1359 | 0.1561 | 0.1619 |
| 0.1562 | 0.1565 | 0.1471 | 0.1393 | 0.1305 | 0.1302 | 0.1338 | 0.1431 | 0.1418 |
| 0.1964 | 0.196  | 0.1971 | 0.1935 | 0.1897 | 0.1835 | 0.1787 | 0.181  | 0.1862 |
| 0.1296 | 0.1338 | 0.1448 | 0.1307 | 0.1239 | 0.1234 | 0.1328 | 0.1356 | 0.1311 |
| 0.1661 | 0.1603 | 0.152  | 0.1432 | 0.145  | 0.1325 | 0.1392 | 0.1406 | 0.1223 |

|        |        |        |        |        |        |        |        |        |
|--------|--------|--------|--------|--------|--------|--------|--------|--------|
| 0.1744 | 0.1894 | 0.1944 | 0.1837 | 0.1734 | 0.1692 | 0.1675 | 0.1654 | 0.162  |
| 0.1283 | 0.1293 | 0.1365 | 0.1318 | 0.1172 | 0.1186 | 0.1289 | 0.1429 | 0.1253 |
| 0.1349 | 0.1454 | 0.1489 | 0.1496 | 0.1357 | 0.1397 | 0.1454 | 0.1665 | 0.1386 |
| 0.1338 | 0.1302 | 0.1257 | 0.122  | 0.1144 | 0.1121 | 0.1185 | 0.1218 | 0.1036 |
| 0.1625 | 0.1592 | 0.1593 | 0.1388 | 0.1325 | 0.135  | 0.1386 | 0.1315 | 0.1221 |
| 0.1189 | 0.1152 | 0.119  | 0.1076 | 0.101  | 0.1009 | 0.1129 | 0.1191 | 0.1083 |
| 0.1404 | 0.1404 | 0.1569 | 0.1696 | 0.1558 | 0.1481 | 0.1574 | 0.1531 | 0.1578 |
| 0.1646 | 0.1614 | 0.153  | 0.1439 | 0.1373 | 0.1403 | 0.1497 | 0.1502 | 0.1398 |
| 0.1329 | 0.1378 | 0.1412 | 0.1345 | 0.1323 | 0.1313 | 0.1367 | 0.1395 | 0.1306 |
| 0.1066 | 0.1143 | 0.119  | 0.1214 | 0.1198 | 0.1267 | 0.1336 | 0.1621 | 0.1409 |
| 0.1577 | 0.1727 | 0.1788 | 0.1802 | 0.1726 | 0.1944 | 0.2012 | 0.2349 | 0.1917 |
| 0.1919 | 0.211  | 0.2138 | 0.2219 | 0.2047 | 0.2242 | 0.2151 | 0.2397 | 0.2108 |
| 0.1888 | 0.188  | 0.1901 | 0.1977 | 0.1871 | 0.193  | 0.1937 | 0.2272 | 0.1819 |
| 0.1674 | 0.1801 | 0.1769 | 0.182  | 0.1696 | 0.1736 | 0.1819 | 0.2154 | 0.1778 |
| 0.1321 | 0.1338 | 0.1377 | 0.1358 | 0.1312 | 0.1366 | 0.1344 | 0.1646 | 0.1324 |
| 0.1464 | 0.1489 | 0.1498 | 0.1455 | 0.1407 | 0.1474 | 0.1551 | 0.1647 | 0.1471 |
| 0.1323 | 0.1431 | 0.1474 | 0.1515 | 0.1448 | 0.1531 | 0.1594 | 0.1694 | 0.1688 |
| 0.1628 | 0.1609 | 0.1667 | 0.1589 | 0.1524 | 0.1477 | 0.1434 | 0.1417 | 0.1396 |
| 0.1293 | 0.1356 | 0.1455 | 0.1378 | 0.1372 | 0.117  | 0.1295 | 0.1356 | 0.1277 |
| 0.1249 | 0.1209 | 0.122  | 0.1221 | 0.124  | 0.1273 | 0.1208 | 0.1391 | 0.1266 |
| 0.1147 | 0.1145 | 0.1156 | 0.1048 | 0.0997 | 0.1073 | 0.1172 | 0.1062 | 0.101  |
| 0.1447 | 0.1525 | 0.1651 | 0.161  | 0.1471 | 0.1416 | 0.159  | 0.1778 | 0.1653 |
| 0.1295 | 0.1276 | 0.1205 | 0.1161 | 0.1092 | 0.1152 | 0.1181 | 0.1261 | 0.1098 |
| 0.1697 | 0.168  | 0.1511 | 0.183  | 0.1809 | 0.1959 | 0.1803 | 0.2572 | 0.2317 |
| 0.1899 | 0.1929 | 0.1924 | 0.2042 | 0.1777 | 0.186  | 0.1631 | 0.2005 | 0.1873 |
| 0.0073 | 0.0077 | 0.0074 | 0.0073 | 0.0069 | 0.0072 | 0.0074 | 0.0077 | 0.0078 |
| 0.0109 | 0.011  | 0.0109 | 0.0111 | 0.0105 | 0.0097 | 0.011  | 0.0123 | 0.0107 |
| 0.0162 | 0.0174 | 0.016  | 0.0203 | 0.0174 | 0.02   | 0.021  | 0.027  | 0.0239 |
| 0      | 0      | 0      | 0      | 0      | 0      | 0      | 0      | 0      |
| 0      | 0      | 0      | 0      | 0      | 0      | 0      | 0      | 0      |
| 0.0114 | 0.0129 | 0.0155 | 0.0171 | 0.0156 | 0.018  | 0.0164 | 0.0207 | 0.0184 |
| 0.0017 | 0.0016 | 0.0014 | 0.0013 | 0.0013 | 0.0013 | 0.0012 | 0.0012 | 0.0009 |
| 0.0046 | 0.0053 | 0.0058 | 0.0056 | 0.0054 | 0.006  | 0.0061 | 0.0073 | 0.006  |
| 0.0086 | 0.0098 | 0.0095 | 0.0098 | 0.0086 | 0.0088 | 0.0087 | 0.0112 | 0.0093 |
| 0.0008 | 0.0009 | 0.0009 | 0.001  | 0.001  | 0.0011 | 0.001  | 0.0012 | 0.001  |
| 0.0184 | 0.0187 | 0.0192 | 0.0174 | 0.0178 | 0.018  | 0.0216 | 0.0254 | 0.0195 |
| 0.1069 | 0.1263 | 0.1227 | 0.1328 | 0.1197 | 0.1204 | 0.1182 | 0.1491 | 0.1253 |
| 0.1738 | 0.1999 | 0.2216 | 0.2401 | 0.2192 | 0.2371 | 0.2247 | 0.252  | 0.2411 |
| 0.0636 | 0.064  | 0.0668 | 0.0692 | 0.0712 | 0.0766 | 0.078  | 0.0928 | 0.0762 |
| 0.0503 | 0.058  | 0.0633 | 0.0661 | 0.066  | 0.0677 | 0.0759 | 0.0935 | 0.0684 |
| 0.1014 | 0.1107 | 0.1113 | 0.1259 | 0.115  | 0.1216 | 0.1172 | 0.1446 | 0.12   |
| 0.1589 | 0.1679 | 0.1558 | 0.1574 | 0.1685 | 0.1986 | 0.2028 | 0.2524 | 0.1988 |
| 0.2258 | 0.2374 | 0.2473 | 0.2687 | 0.2098 | 0.2327 | 0.2482 | 0.308  | 0.2764 |
| 0.2658 | 0.2926 | 0.2789 | 0.2846 | 0.2696 | 0.2946 | 0.3091 | 0.3169 | 0.2862 |

|        |        |        |        |        |        |        |        |        |
|--------|--------|--------|--------|--------|--------|--------|--------|--------|
| 0.1389 | 0.139  | 0.1407 | 0.1273 | 0.1248 | 0.1141 | 0.1309 | 0.13   | 0.1226 |
| 0.1252 | 0.1243 | 0.1326 | 0.1391 | 0.1294 | 0.1419 | 0.1295 | 0.1317 | 0.118  |
| 0.1339 | 0.1375 | 0.1391 | 0.1353 | 0.1203 | 0.1265 | 0.1219 | 0.1289 | 0.1245 |
| 0.1627 | 0.154  | 0.1563 | 0.1598 | 0.1593 | 0.1596 | 0.1466 | 0.1509 | 0.1481 |
| 0.1362 | 0.1334 | 0.1378 | 0.1272 | 0.1187 | 0.1221 | 0.1369 | 0.1336 | 0.1286 |
| 0.1564 | 0.1505 | 0.145  | 0.152  | 0.1431 | 0.1443 | 0.147  | 0.1375 | 0.1245 |
| 0.1875 | 0.1896 | 0.1772 | 0.1671 | 0.1521 | 0.1546 | 0.1683 | 0.1629 | 0.1521 |
| 0.1326 | 0.1299 | 0.1419 | 0.1423 | 0.1483 | 0.1523 | 0.1479 | 0.1568 | 0.1335 |
| 0.161  | 0.1678 | 0.1828 | 0.178  | 0.1717 | 0.1926 | 0.1967 | 0.2305 | 0.1812 |
| 0.1432 | 0.1437 | 0.1512 | 0.1489 | 0.1503 | 0.1587 | 0.1657 | 0.205  | 0.1526 |
| 0.1429 | 0.1361 | 0.1397 | 0.1305 | 0.1247 | 0.1285 | 0.1292 | 0.145  | 0.1285 |
| 0.1449 | 0.1405 | 0.1364 | 0.1366 | 0.1191 | 0.1182 | 0.1156 | 0.1283 | 0.1126 |
| 0.1393 | 0.1292 | 0.1321 | 0.12   | 0.1223 | 0.1163 | 0.1281 | 0.1369 | 0.1256 |
| 0.1277 | 0.123  | 0.1175 | 0.1217 | 0.1165 | 0.1194 | 0.1302 | 0.1487 | 0.1333 |
| 0.1766 | 0.1883 | 0.1934 | 0.222  | 0.2124 | 0.2213 | 0.2277 | 0.2514 | 0.2052 |
| 0.1571 | 0.1688 | 0.1819 | 0.1902 | 0.1933 | 0.2136 | 0.2265 | 0.2626 | 0.2103 |
| 0.1708 | 0.1809 | 0.1822 | 0.1818 | 0.174  | 0.1837 | 0.1881 | 0.215  | 0.1871 |
| 0.1249 | 0.1299 | 0.131  | 0.123  | 0.1273 | 0.1189 | 0.1258 | 0.1456 | 0.1219 |
| 0.1181 | 0.1344 | 0.1338 | 0.143  | 0.1285 | 0.1382 | 0.1472 | 0.1861 | 0.14   |
| 0.1994 | 0.2213 | 0.2205 | 0.2287 | 0.2089 | 0.2144 | 0.2136 | 0.2588 | 0.2073 |
| 0.1117 | 0.1184 | 0.1176 | 0.1195 | 0.117  | 0.119  | 0.124  | 0.1521 | 0.1178 |
| 0.1738 | 0.1672 | 0.1656 | 0.1603 | 0.148  | 0.1503 | 0.1484 | 0.1673 | 0.1565 |
| 0.258  | 0.2318 | 0.2626 | 0.255  | 0.2296 | 0.2144 | 0.2319 | 0.2562 | 0.2586 |
| 0.2029 | 0.2146 | 0.1908 | 0.2037 | 0.1834 | 0.1864 | 0.1779 | 0.2022 | 0.1952 |
| 0.1531 | 0.15   | 0.1501 | 0.1472 | 0.1438 | 0.1528 | 0.1597 | 0.1739 | 0.1649 |
| 0.1406 | 0.1551 | 0.1684 | 0.1487 | 0.1484 | 0.1445 | 0.154  | 0.1689 | 0.1373 |
| 0.1245 | 0.1273 | 0.1267 | 0.1167 | 0.1107 | 0.112  | 0.1147 | 0.1295 | 0.1108 |
| 0.1958 | 0.1933 | 0.1984 | 0.1861 | 0.174  | 0.1664 | 0.1703 | 0.1804 | 0.1681 |
| 0.141  | 0.1422 | 0.1393 | 0.1408 | 0.1409 | 0.1479 | 0.1407 | 0.1665 | 0.1338 |
| 0.1901 | 0.1964 | 0.1848 | 0.2389 | 0.2176 | 0.2318 | 0.2419 | 0.3275 | 0.2623 |
| 0.1897 | 0.2107 | 0.1982 | 0.2039 | 0.1737 | 0.1797 | 0.1609 | 0.2035 | 0.1621 |
| 0.0674 | 0.0751 | 0.0756 | 0.0783 | 0.0751 | 0.0792 | 0.0803 | 0.096  | 0.0785 |
| 0.0093 | 0.0106 | 0.0095 | 0.0102 | 0.011  | 0.0119 | 0.0119 | 0.0141 | 0.0108 |
| 0      | 0      | 0      | 0      | 0      | 0      | 0      | 0      | 0      |
| 0      | 0      | 0      | 0      | 0      | 0      | 0      | 0      | 0      |
| 0      | 0      | 0      | 0      | 0      | 0      | 0      | 0      | 0      |
| 0.0099 | 0.0107 | 0.0095 | 0.0115 | 0.0104 | 0.0114 | 0.0114 | 0.0152 | 0.0129 |
| 0.0014 | 0.0013 | 0.0014 | 0.0013 | 0.0012 | 0.0011 | 0.0011 | 0.0011 | 0.0011 |
| 0.0009 | 0.0009 | 0.0008 | 0.0008 | 0.0007 | 0.0007 | 0.0008 | 0.0008 | 0.0007 |
| 0      | 0      | 0      | 0      | 0      | 0      | 0      | 0      | 0      |
| 0      | 0      | 0      | 0      | 0      | 0      | 0      | 0      | 0      |
| 0.0313 | 0.0338 | 0.0366 | 0.0366 | 0.0278 | 0.0302 | 0.0316 | 0.0354 | 0.029  |
| 0.1256 | 0.1217 | 0.1226 | 0.124  | 0.1059 | 0.1104 | 0.1265 | 0.1533 | 0.1409 |
| 0.1727 | 0.1945 | 0.1868 | 0.2013 | 0.1515 | 0.1671 | 0.1503 | 0.1854 | 0.1584 |

|        |        |        |        |        |        |        |        |        |
|--------|--------|--------|--------|--------|--------|--------|--------|--------|
| 0.17   | 0.1702 | 0.1631 | 0.1708 | 0.1703 | 0.1855 | 0.1799 | 0.2132 | 0.1972 |
| 0.0642 | 0.0708 | 0.0684 | 0.0722 | 0.0683 | 0.0748 | 0.0764 | 0.0958 | 0.0783 |
| 0.0989 | 0.1082 | 0.104  | 0.1234 | 0.1    | 0.1058 | 0.1035 | 0.1376 | 0.1117 |
| 0.1994 | 0.215  | 0.197  | 0.2076 | 0.1973 | 0.2082 | 0.2251 | 0.2654 | 0.2127 |
| 0.2731 | 0.3068 | 0.2705 | 0.3225 | 0.2951 | 0.2965 | 0.2903 | 0.4101 | 0.3969 |
| 0.2745 | 0.3249 | 0.3551 | 0.3742 | 0.3541 | 0.3933 | 0.3576 | 0.4331 | 0.3865 |
| 0.2081 | 0.2195 | 0.2296 | 0.223  | 0.2082 | 0.2255 | 0.2261 | 0.2433 | 0.2366 |
| 0.2354 | 0.2449 | 0.2293 | 0.2417 | 0.2006 | 0.2003 | 0.2008 | 0.2146 | 0.2011 |
| 0.1616 | 0.1646 | 0.1645 | 0.1457 | 0.1378 | 0.1346 | 0.1369 | 0.1496 | 0.1447 |
| 0.182  | 0.179  | 0.1972 | 0.1733 | 0.1631 | 0.1578 | 0.1563 | 0.1622 | 0.1455 |
| 0.1454 | 0.1449 | 0.1327 | 0.1269 | 0.1285 | 0.1241 | 0.1199 | 0.1266 | 0.1161 |
| 0.255  | 0.2567 | 0.2531 | 0.2548 | 0.2271 | 0.2208 | 0.2067 | 0.242  | 0.2269 |
| 0.1781 | 0.1741 | 0.1722 | 0.1661 | 0.154  | 0.1537 | 0.1547 | 0.1707 | 0.1631 |
| 0.1161 | 0.1275 | 0.1311 | 0.13   | 0.1367 | 0.1374 | 0.1465 | 0.1542 | 0.1254 |
| 0.1788 | 0.1693 | 0.1724 | 0.1745 | 0.1769 | 0.1747 | 0.1695 | 0.21   | 0.1592 |
| 0.1726 | 0.187  | 0.1831 | 0.2009 | 0.1892 | 0.2187 | 0.2203 | 0.257  | 0.1888 |
| 0.131  | 0.1323 | 0.135  | 0.1396 | 0.159  | 0.1654 | 0.175  | 0.2046 | 0.1692 |
| 0.1479 | 0.1622 | 0.1673 | 0.1722 | 0.1687 | 0.1775 | 0.1859 | 0.2129 | 0.1699 |
| 0.128  | 0.1218 | 0.1215 | 0.1253 | 0.1207 | 0.1252 | 0.1449 | 0.1702 | 0.1307 |
| 0.181  | 0.1989 | 0.2019 | 0.2129 | 0.1972 | 0.2014 | 0.208  | 0.242  | 0.2071 |
| 0.277  | 0.3188 | 0.318  | 0.3045 | 0.2938 | 0.3099 | 0.3353 | 0.3842 | 0.3316 |
| 0.3007 | 0.2734 | 0.256  | 0.2939 | 0.2699 | 0.2925 | 0.2933 | 0.3462 | 0.3078 |
| 0.1901 | 0.2053 | 0.1937 | 0.2004 | 0.1893 | 0.2131 | 0.2177 | 0.2475 | 0.2262 |
| 0.1751 | 0.1825 | 0.1848 | 0.1919 | 0.1804 | 0.1877 | 0.1952 | 0.2251 | 0.1908 |
| 0.1455 | 0.1489 | 0.1381 | 0.1412 | 0.132  | 0.1446 | 0.1431 | 0.1627 | 0.1302 |
| 0.1587 | 0.1745 | 0.171  | 0.1807 | 0.1761 | 0.1817 | 0.1949 | 0.2217 | 0.1821 |
| 0.1376 | 0.1458 | 0.1484 | 0.1363 | 0.1333 | 0.1433 | 0.1393 | 0.1588 | 0.1317 |
| 0.153  | 0.1835 | 0.1762 | 0.1952 | 0.1731 | 0.1674 | 0.1677 | 0.1899 | 0.1866 |
| 0.2064 | 0.1922 | 0.1751 | 0.1931 | 0.165  | 0.206  | 0.1963 | 0.2297 | 0.2396 |
| 0.1949 | 0.2078 | 0.1978 | 0.2058 | 0.1876 | 0.207  | 0.2041 | 0.2036 | 0.1889 |
| 0.1896 | 0.1934 | 0.1934 | 0.1895 | 0.1786 | 0.1769 | 0.1675 | 0.1728 | 0.1559 |
| 0.1358 | 0.141  | 0.1424 | 0.1407 | 0.1383 | 0.1386 | 0.1427 | 0.1502 | 0.1444 |
| 0.1299 | 0.1331 | 0.1266 | 0.1234 | 0.1207 | 0.1217 | 0.119  | 0.1343 | 0.1155 |
| 0.1213 | 0.1372 | 0.142  | 0.1323 | 0.129  | 0.1365 | 0.1281 | 0.157  | 0.132  |
| 0.1459 | 0.1586 | 0.1551 | 0.1612 | 0.1593 | 0.171  | 0.1798 | 0.2172 | 0.1813 |
| 0.2624 | 0.2597 | 0.2661 | 0.2613 | 0.239  | 0.3057 | 0.283  | 0.3391 | 0.2758 |
| 0.208  | 0.2096 | 0.1892 | 0.209  | 0.1558 | 0.1715 | 0.1786 | 0.2227 | 0.1941 |
| 0.1289 | 0.121  | 0.1118 | 0.1165 | 0.1045 | 0.1073 | 0.1075 | 0.1365 | 0.1234 |
| 0.0227 | 0.0245 | 0.0224 | 0.0236 | 0.0225 | 0.0227 | 0.0246 | 0.0276 | 0.0258 |
| 0.0136 | 0.0148 | 0.014  | 0.016  | 0.0137 | 0.0144 | 0.0118 | 0.0164 | 0.0138 |
| 0      | 0      | 0      | 0      | 0      | 0      | 0      | 0      | 0      |
| 0      | 0      | 0      | 0      | 0      | 0      | 0      | 0      | 0      |
| 0.0008 | 0.0008 | 0.0008 | 0.0008 | 0.0008 | 0.0007 | 0.0007 | 0.0007 | 0.0007 |
| 0.0127 | 0.0122 | 0.0125 | 0.0134 | 0.0121 | 0.0133 | 0.0133 | 0.0155 | 0.0146 |

|        |        |        |        |        |        |        |        |        |
|--------|--------|--------|--------|--------|--------|--------|--------|--------|
| 0.018  | 0.0184 | 0.015  | 0.016  | 0.0163 | 0.0217 | 0.0186 | 0.0217 | 0.0191 |
| 0      | 0      | 0      | 0      | 0      | 0      | 0      | 0      | 0      |
| 0.016  | 0.0167 | 0.0173 | 0.0177 | 0.0175 | 0.0193 | 0.0195 | 0.0226 | 0.0183 |
| 0.0721 | 0.0817 | 0.0816 | 0.0889 | 0.086  | 0.0956 | 0.098  | 0.1155 | 0.0931 |
| 0.1235 | 0.1299 | 0.1232 | 0.1296 | 0.122  | 0.1351 | 0.1309 | 0.1547 | 0.1375 |
| 0.0911 | 0.0968 | 0.0988 | 0.1004 | 0.095  | 0.1002 | 0.0975 | 0.1188 | 0.1    |
| 0.1547 | 0.1637 | 0.1562 | 0.1684 | 0.1613 | 0.174  | 0.1684 | 0.203  | 0.1683 |
| 0.0177 | 0.0172 | 0.0118 | 0.0139 | 0.011  | 0.0152 | 0.0135 | 0.0212 | 0.02   |
| 0.0741 | 0.078  | 0.0723 | 0.0739 | 0.0717 | 0.079  | 0.0776 | 0.0957 | 0.08   |
| 0.2267 | 0.2411 | 0.2467 | 0.2592 | 0.2379 | 0.267  | 0.2665 | 0.3196 | 0.2898 |
| 0.1896 | 0.2184 | 0.2386 | 0.2874 | 0.2301 | 0.2551 | 0.2533 | 0.3393 | 0.3141 |
| 0.2044 | 0.2142 | 0.203  | 0.1992 | 0.1609 | 0.1956 | 0.2068 | 0.233  | 0.2086 |
| 0.2427 | 0.2667 | 0.2564 | 0.295  | 0.267  | 0.2691 | 0.2841 | 0.3358 | 0.3022 |
| 0.2205 | 0.2377 | 0.2239 | 0.2288 | 0.1823 | 0.2097 | 0.1951 | 0.2286 | 0.2015 |
| 0.1692 | 0.1745 | 0.1771 | 0.146  | 0.1299 | 0.136  | 0.1364 | 0.1352 | 0.137  |
| 0.1366 | 0.1376 | 0.1404 | 0.1206 | 0.1116 | 0.1106 | 0.118  | 0.1242 | 0.1125 |
| 0.131  | 0.1379 | 0.1398 | 0.1304 | 0.1159 | 0.1243 | 0.1275 | 0.1375 | 0.1326 |
| 0.2261 | 0.2169 | 0.2332 | 0.2289 | 0.1915 | 0.202  | 0.2012 | 0.245  | 0.2365 |
| 0.1758 | 0.1878 | 0.1905 | 0.2027 | 0.1847 | 0.1923 | 0.1961 | 0.2296 | 0.1918 |
| 0.1542 | 0.1583 | 0.1691 | 0.1752 | 0.1803 | 0.1848 | 0.1732 | 0.2062 | 0.1637 |
| 0.2155 | 0.2132 | 0.2088 | 0.2128 | 0.2073 | 0.2103 | 0.2187 | 0.2539 | 0.1943 |
| 0.1794 | 0.1935 | 0.1747 | 0.1569 | 0.1346 | 0.1555 | 0.1846 | 0.228  | 0.1651 |
| 0.1753 | 0.1887 | 0.1895 | 0.2025 | 0.1936 | 0.2147 | 0.2184 | 0.2781 | 0.2182 |
| 0.1537 | 0.1523 | 0.1531 | 0.1481 | 0.1506 | 0.1687 | 0.1847 | 0.2221 | 0.1777 |
| 0.1247 | 0.1203 | 0.1252 | 0.1235 | 0.1145 | 0.1213 | 0.1192 | 0.1435 | 0.1141 |
| 0.2015 | 0.2157 | 0.1865 | 0.2115 | 0.1942 | 0.2101 | 0.2397 | 0.257  | 0.228  |
| 0.1911 | 0.1908 | 0.165  | 0.1954 | 0.1738 | 0.1731 | 0.1835 | 0.2398 | 0.2046 |
| 0.1801 | 0.1921 | 0.1903 | 0.1845 | 0.1793 | 0.1829 | 0.1838 | 0.2009 | 0.1667 |
| 0.1305 | 0.1295 | 0.12   | 0.1412 | 0.146  | 0.1688 | 0.178  | 0.2278 | 0.1606 |
| 0.15   | 0.1629 | 0.1592 | 0.1692 | 0.1555 | 0.1809 | 0.1907 | 0.2367 | 0.2066 |
| 0.1645 | 0.1782 | 0.1799 | 0.1808 | 0.1671 | 0.1796 | 0.1773 | 0.2104 | 0.1799 |
| 0.1557 | 0.1686 | 0.1785 | 0.1903 | 0.1772 | 0.1889 | 0.1929 | 0.2278 | 0.1885 |
| 0.1242 | 0.1297 | 0.124  | 0.1146 | 0.1296 | 0.1353 | 0.1403 | 0.1598 | 0.1324 |
| 0.1034 | 0.1084 | 0.095  | 0.0937 | 0.0954 | 0.0863 | 0.0918 | 0.0946 | 0.0894 |
| 0.1778 | 0.1836 | 0.1781 | 0.1827 | 0.1693 | 0.1672 | 0.1663 | 0.1745 | 0.1705 |
| 0.1949 | 0.2018 | 0.2016 | 0.1999 | 0.1876 | 0.1812 | 0.1827 | 0.1804 | 0.1749 |
| 0.1541 | 0.1564 | 0.1555 | 0.1556 | 0.1435 | 0.1388 | 0.1336 | 0.153  | 0.1545 |
| 0.2283 | 0.2261 | 0.2085 | 0.2138 | 0.1919 | 0.1875 | 0.1819 | 0.2052 | 0.1894 |
| 0.1614 | 0.1657 | 0.1701 | 0.17   | 0.1626 | 0.1663 | 0.1701 | 0.1962 | 0.1632 |
| 0.0851 | 0.1023 | 0.1005 | 0.0925 | 0.0931 | 0.0999 | 0.094  | 0.119  | 0.0907 |
| 0.1442 | 0.1514 | 0.154  | 0.1518 | 0.1352 | 0.1363 | 0.1442 | 0.1543 | 0.1495 |
| 0.1626 | 0.1693 | 0.1916 | 0.22   | 0.2234 | 0.2369 | 0.2305 | 0.2773 | 0.2395 |
| 0.317  | 0.3366 | 0.3239 | 0.3837 | 0.3544 | 0.3091 | 0.23   | 0.2904 | 0.2656 |
| 0.2349 | 0.2722 | 0.2821 | 0.3236 | 0.2852 | 0.3114 | 0.2711 | 0.3101 | 0.2721 |

|        |        |        |        |        |        |        |        |        |
|--------|--------|--------|--------|--------|--------|--------|--------|--------|
| 0.0922 | 0.0978 | 0.0793 | 0.0848 | 0.0646 | 0.0785 | 0.0704 | 0.092  | 0.0921 |
| 0      | 0      | 0      | 0      | 0      | 0      | 0      | 0      | 0      |
| 0      | 0      | 0      | 0      | 0      | 0      | 0      | 0      | 0      |
| 0      | 0      | 0      | 0      | 0      | 0      | 0      | 0      | 0      |
| 0.0161 | 0.0165 | 0.0159 | 0.0188 | 0.0156 | 0.015  | 0.0165 | 0.0211 | 0.0188 |
| 0.0115 | 0.0111 | 0.0121 | 0.0135 | 0.0108 | 0.0115 | 0.013  | 0.0179 | 0.0145 |
| 0.0009 | 0.001  | 0.001  | 0.0009 | 0.001  | 0.0011 | 0.0011 | 0.0014 | 0.001  |
| 0      | 0      | 0      | 0      | 0      | 0      | 0      | 0      | 0      |
| 0.0006 | 0.0006 | 0.0007 | 0.0007 | 0.0006 | 0.0006 | 0.0006 | 0.0005 | 0.0005 |
| 0.0567 | 0.0625 | 0.0582 | 0.0681 | 0.0428 | 0.0552 | 0.0643 | 0.0732 | 0.061  |
| 0.1004 | 0.0823 | 0.0809 | 0.089  | 0.0924 | 0.0925 | 0.1074 | 0.1387 | 0.1213 |
| 0.0998 | 0.1146 | 0.1061 | 0.1285 | 0.1164 | 0.131  | 0.1194 | 0.139  | 0.1417 |
| 0.0751 | 0.0772 | 0.08   | 0.0825 | 0.0781 | 0.0859 | 0.0901 | 0.1074 | 0.0957 |
| 0.0383 | 0.0427 | 0.0407 | 0.0431 | 0.0408 | 0.0409 | 0.0374 | 0.0427 | 0.0395 |
| 0.0542 | 0.0596 | 0.0679 | 0.0675 | 0.0684 | 0.0798 | 0.0835 | 0.0985 | 0.0695 |
| 0.1563 | 0.158  | 0.1594 | 0.1656 | 0.1593 | 0.1693 | 0.1721 | 0.2082 | 0.1768 |
| 0.132  | 0.136  | 0.1302 | 0.1332 | 0.1267 | 0.135  | 0.1374 | 0.1566 | 0.1352 |
| 0.107  | 0.1062 | 0.098  | 0.1032 | 0.1024 | 0.1056 | 0.1091 | 0.1177 | 0.109  |
| 0.2199 | 0.2265 | 0.2009 | 0.2056 | 0.1934 | 0.1985 | 0.1974 | 0.2376 | 0.2226 |
| 0.162  | 0.1627 | 0.1681 | 0.1641 | 0.1578 | 0.1713 | 0.1721 | 0.1809 | 0.1744 |
| 0.1657 | 0.1727 | 0.1739 | 0.1472 | 0.1389 | 0.1363 | 0.1331 | 0.1194 | 0.1076 |
| 0.1301 | 0.1243 | 0.122  | 0.1233 | 0.1121 | 0.1209 | 0.1317 | 0.1425 | 0.129  |
| 0.1429 | 0.1406 | 0.1369 | 0.123  | 0.1159 | 0.1146 | 0.115  | 0.122  | 0.1173 |
| 0.1388 | 0.1375 | 0.1431 | 0.1467 | 0.1391 | 0.1413 | 0.1507 | 0.1594 | 0.1502 |
| 0.1241 | 0.121  | 0.1235 | 0.1179 | 0.1086 | 0.1082 | 0.1107 | 0.1228 | 0.1009 |
| 0.1131 | 0.1111 | 0.1086 | 0.1066 | 0.1044 | 0.1155 | 0.117  | 0.1313 | 0.1115 |
| 0.1413 | 0.1504 | 0.1508 | 0.1511 | 0.1464 | 0.1494 | 0.1492 | 0.173  | 0.1533 |
| 0.1346 | 0.1443 | 0.1424 | 0.1449 | 0.1439 | 0.1588 | 0.16   | 0.1883 | 0.1552 |
| 0.1304 | 0.146  | 0.1362 | 0.1429 | 0.143  | 0.1615 | 0.1641 | 0.2081 | 0.162  |
| 0.2163 | 0.229  | 0.232  | 0.2378 | 0.2244 | 0.2337 | 0.2446 | 0.2913 | 0.2376 |
| 0.1809 | 0.1883 | 0.1886 | 0.1891 | 0.1839 | 0.1924 | 0.198  | 0.2267 | 0.1987 |
| 0.1178 | 0.1288 | 0.1362 | 0.1504 | 0.1385 | 0.1406 | 0.1448 | 0.1627 | 0.1473 |
| 0.2    | 0.2049 | 0.1935 | 0.2095 | 0.1787 | 0.2098 | 0.2255 | 0.2661 | 0.2351 |
| 0.1877 | 0.1948 | 0.1971 | 0.1917 | 0.1856 | 0.1885 | 0.1913 | 0.2122 | 0.2019 |
| 0.1854 | 0.1923 | 0.177  | 0.1927 | 0.1754 | 0.1995 | 0.2043 | 0.2428 | 0.2055 |
| 0.1348 | 0.1362 | 0.1366 | 0.1334 | 0.1315 | 0.1361 | 0.1368 | 0.1458 | 0.1286 |
| 0.0978 | 0.0954 | 0.0931 | 0.0894 | 0.079  | 0.0814 | 0.0864 | 0.0929 | 0.087  |
| 0.1902 | 0.1828 | 0.1866 | 0.1725 | 0.1563 | 0.1645 | 0.1667 | 0.1918 | 0.1792 |
| 0.1391 | 0.1418 | 0.1402 | 0.1362 | 0.1284 | 0.1343 | 0.1415 | 0.1578 | 0.1398 |
| 0.1195 | 0.1272 | 0.122  | 0.1077 | 0.0986 | 0.1006 | 0.1045 | 0.1045 | 0.0941 |
| 0.2126 | 0.2282 | 0.2315 | 0.2494 | 0.2109 | 0.2011 | 0.2001 | 0.2334 | 0.2243 |
| 0.2162 | 0.2294 | 0.2225 | 0.2241 | 0.2115 | 0.2003 | 0.1815 | 0.2023 | 0.1919 |
| 0.1372 | 0.1372 | 0.1294 | 0.1277 | 0.1199 | 0.1198 | 0.1233 | 0.1223 | 0.1144 |
| 0.1752 | 0.1792 | 0.1791 | 0.171  | 0.1557 | 0.1701 | 0.166  | 0.1919 | 0.1655 |

|        |        |        |        |        |        |        |        |        |
|--------|--------|--------|--------|--------|--------|--------|--------|--------|
| 0.1689 | 0.1757 | 0.1817 | 0.1854 | 0.1799 | 0.1853 | 0.1906 | 0.2135 | 0.1839 |
| 0.1072 | 0.1144 | 0.1185 | 0.1277 | 0.1326 | 0.1418 | 0.1509 | 0.1867 | 0.1543 |
| 0.1515 | 0.1458 | 0.1431 | 0.1351 | 0.1367 | 0.1365 | 0.1416 | 0.1544 | 0.126  |
| 0.1449 | 0.1591 | 0.1517 | 0.1615 | 0.1371 | 0.1402 | 0.1481 | 0.1771 | 0.1525 |
| 0.1028 | 0.1033 | 0.1037 | 0.1012 | 0.0855 | 0.102  | 0.1137 | 0.129  | 0.1151 |
| 0.0292 | 0.0228 | 0.0232 | 0.0302 | 0.0262 | 0.0206 | 0.0302 | 0.0326 | 0.0313 |
| 0      | 0      | 0      | 0      | 0      | 0      | 0      | 0      | 0      |
| 0.0554 | 0.0583 | 0.0617 | 0.0625 | 0.0582 | 0.0609 | 0.0517 | 0.0663 | 0.0597 |
| 0      | 0      | 0      | 0      | 0      | 0      | 0      | 0      | 0      |
| 0      | 0      | 0      | 0      | 0      | 0      | 0      | 0      | 0      |
| 0.0147 | 0.0161 | 0.0132 | 0.0126 | 0.0111 | 0.0124 | 0.0116 | 0.0143 | 0.0155 |
| 0      | 0      | 0      | 0      | 0      | 0      | 0      | 0      | 0      |
| 0.0016 | 0.0016 | 0.0018 | 0.0019 | 0.0022 | 0.0026 | 0.0027 | 0.0034 | 0.0028 |
| 0.0116 | 0.0145 | 0.0127 | 0.0189 | 0.017  | 0.0188 | 0.0224 | 0.0268 | 0.0245 |
| 0      | 0      | 0      | 0      | 0      | 0      | 0      | 0      | 0      |
| 0      | 0      | 0      | 0      | 0      | 0      | 0      | 0      | 0      |
| 0.0478 | 0.057  | 0.0571 | 0.0619 | 0.0546 | 0.0575 | 0.0608 | 0.0696 | 0.0581 |
| 0.1699 | 0.1851 | 0.1969 | 0.2008 | 0.1729 | 0.1884 | 0.1892 | 0.2415 | 0.2275 |
| 0.0343 | 0.0343 | 0.0371 | 0.0426 | 0.0374 | 0.0368 | 0.0368 | 0.0421 | 0.0385 |
| 0.113  | 0.1227 | 0.1264 | 0.1425 | 0.1482 | 0.1492 | 0.144  | 0.1724 | 0.1475 |
| 0.0686 | 0.0749 | 0.0716 | 0.0773 | 0.0716 | 0.0738 | 0.0731 | 0.0884 | 0.0679 |
| 0.1904 | 0.1899 | 0.1816 | 0.1791 | 0.1727 | 0.193  | 0.189  | 0.2202 | 0.1882 |
| 0.1632 | 0.1617 | 0.1584 | 0.1509 | 0.1512 | 0.158  | 0.1672 | 0.1925 | 0.1563 |
| 0.1341 | 0.1388 | 0.1387 | 0.1416 | 0.136  | 0.1419 | 0.1473 | 0.1693 | 0.1474 |
| 0.1631 | 0.1695 | 0.1652 | 0.1747 | 0.1469 | 0.1723 | 0.1881 | 0.2307 | 0.2169 |
| 0.1737 | 0.1863 | 0.1806 | 0.1784 | 0.1613 | 0.1741 | 0.173  | 0.1939 | 0.1717 |
| 0.1863 | 0.1683 | 0.1736 | 0.176  | 0.165  | 0.1566 | 0.162  | 0.1719 | 0.1603 |
| 0.1657 | 0.1671 | 0.1647 | 0.1614 | 0.1443 | 0.1509 | 0.151  | 0.1606 | 0.1556 |
| 0.1468 | 0.1431 | 0.1513 | 0.1387 | 0.1326 | 0.1312 | 0.1328 | 0.1372 | 0.1204 |
| 0.1494 | 0.1451 | 0.1477 | 0.1414 | 0.14   | 0.1508 | 0.1484 | 0.1492 | 0.1341 |
| 0.138  | 0.141  | 0.1459 | 0.1415 | 0.1377 | 0.1301 | 0.1232 | 0.1273 | 0.1182 |
| 0.1453 | 0.1436 | 0.1423 | 0.1335 | 0.1307 | 0.1249 | 0.1258 | 0.1342 | 0.1297 |
| 0.1458 | 0.1388 | 0.135  | 0.1373 | 0.132  | 0.1357 | 0.1395 | 0.1395 | 0.1289 |
| 0.1289 | 0.1282 | 0.1284 | 0.1154 | 0.1157 | 0.1139 | 0.1154 | 0.1208 | 0.1002 |
| 0.1673 | 0.1777 | 0.172  | 0.1693 | 0.1644 | 0.1689 | 0.1693 | 0.1988 | 0.1651 |
| 0.1331 | 0.1461 | 0.1394 | 0.1502 | 0.1497 | 0.1634 | 0.1584 | 0.1916 | 0.152  |
| 0.172  | 0.1763 | 0.181  | 0.1774 | 0.1646 | 0.1849 | 0.1887 | 0.2253 | 0.1711 |
| 0.1168 | 0.1227 | 0.122  | 0.1196 | 0.1151 | 0.1244 | 0.1264 | 0.1406 | 0.1227 |
| 0.2069 | 0.2282 | 0.2089 | 0.2348 | 0.2097 | 0.2107 | 0.2167 | 0.2414 | 0.2249 |
| 0.1749 | 0.1822 | 0.1808 | 0.1667 | 0.1655 | 0.1628 | 0.1755 | 0.1903 | 0.1772 |
| 0.2008 | 0.1877 | 0.1948 | 0.1567 | 0.1147 | 0.1366 | 0.1496 | 0.1919 | 0.1741 |
| 0.1627 | 0.174  | 0.1682 | 0.1605 | 0.1417 | 0.1437 | 0.1537 | 0.156  | 0.1436 |
| 0.2066 | 0.2085 | 0.1986 | 0.1906 | 0.1762 | 0.1803 | 0.1878 | 0.1925 | 0.1781 |
| 0.1284 | 0.1162 | 0.1266 | 0.1188 | 0.1071 | 0.103  | 0.1084 | 0.0951 | 0.0912 |

|        |        |        |        |        |        |        |        |        |
|--------|--------|--------|--------|--------|--------|--------|--------|--------|
| 0.1535 | 0.159  | 0.1585 | 0.1565 | 0.1515 | 0.1525 | 0.1511 | 0.1546 | 0.1346 |
| 0.1814 | 0.1862 | 0.1862 | 0.1773 | 0.1649 | 0.1559 | 0.1653 | 0.1693 | 0.1532 |
| 0.1325 | 0.134  | 0.1376 | 0.1359 | 0.1143 | 0.1271 | 0.134  | 0.1445 | 0.1247 |
| 0.127  | 0.1485 | 0.1644 | 0.176  | 0.1588 | 0.1554 | 0.1728 | 0.1968 | 0.2012 |
| 0.1667 | 0.1665 | 0.1622 | 0.1593 | 0.1476 | 0.1575 | 0.166  | 0.1725 | 0.1635 |
| 0.1764 | 0.1871 | 0.1954 | 0.1767 | 0.1673 | 0.1543 | 0.1517 | 0.1387 | 0.1334 |
| 0.1594 | 0.1654 | 0.1698 | 0.1608 | 0.1622 | 0.1601 | 0.1644 | 0.1728 | 0.1477 |
| 0.1823 | 0.1956 | 0.2063 | 0.2161 | 0.2192 | 0.2423 | 0.2547 | 0.2902 | 0.2335 |
| 0.1436 | 0.1591 | 0.1663 | 0.1643 | 0.1608 | 0.1765 | 0.1897 | 0.2411 | 0.1711 |
| 0.0604 | 0.0581 | 0.0592 | 0.0631 | 0.063  | 0.0668 | 0.0706 | 0.0692 | 0.0563 |
| 0.03   | 0.0329 | 0.0342 | 0.0323 | 0.0325 | 0.0354 | 0.0347 | 0.0389 | 0.0306 |
| 0.0859 | 0.0883 | 0.0866 | 0.0861 | 0.082  | 0.0843 | 0.0822 | 0.0951 | 0.081  |
| 0.0122 | 0.0132 | 0.0135 | 0.0132 | 0.0119 | 0.0124 | 0.0121 | 0.0134 | 0.0136 |
| 0.0015 | 0.0015 | 0.0014 | 0.0012 | 0.0011 | 0.0011 | 0.0011 | 0.0012 | 0.0011 |
| 0      | 0      | 0      | 0      | 0      | 0      | 0      | 0      | 0      |
| 0      | 0      | 0      | 0      | 0      | 0      | 0      | 0      | 0      |
| 0.0008 | 0.0007 | 0.0007 | 0.0007 | 0.0005 | 0.0006 | 0.0005 | 0.0005 | 0.0004 |
| 0.0013 | 0.0017 | 0.0012 | 0.0014 | 0.0016 | 0.0017 | 0.0017 | 0.0022 | 0.0019 |
| 0      | 0      | 0      | 0      | 0      | 0      | 0      | 0      | 0      |
| 0      | 0      | 0      | 0      | 0      | 0      | 0      | 0      | 0      |
| 0      | 0      | 0      | 0      | 0      | 0      | 0      | 0      | 0      |
| 0.0173 | 0.0192 | 0.0178 | 0.0158 | 0.0141 | 0.0143 | 0.0158 | 0.0184 | 0.0166 |
| 0.023  | 0.0256 | 0.0242 | 0.0245 | 0.0227 | 0.0236 | 0.0247 | 0.0297 | 0.0266 |
| 0.0331 | 0.0349 | 0.0357 | 0.0379 | 0.034  | 0.0346 | 0.0351 | 0.0416 | 0.036  |
| 0.0402 | 0.0394 | 0.0372 | 0.038  | 0.0364 | 0.0367 | 0.035  | 0.0424 | 0.0326 |
| 0.0803 | 0.0823 | 0.0819 | 0.0845 | 0.0822 | 0.0892 | 0.0945 | 0.1085 | 0.0918 |
| 0.0892 | 0.0923 | 0.0903 | 0.0963 | 0.0897 | 0.0955 | 0.1002 | 0.1161 | 0.0953 |
| 0.093  | 0.0949 | 0.0927 | 0.091  | 0.0859 | 0.0863 | 0.0951 | 0.1198 | 0.0905 |
| 0.1519 | 0.1563 | 0.1475 | 0.1338 | 0.1302 | 0.1461 | 0.1518 | 0.1948 | 0.1546 |
| 0.131  | 0.1346 | 0.1359 | 0.1447 | 0.1446 | 0.1609 | 0.1633 | 0.1887 | 0.146  |
| 0.1292 | 0.1411 | 0.1398 | 0.1451 | 0.1408 | 0.1467 | 0.1508 | 0.1713 | 0.1383 |
| 0.1891 | 0.2016 | 0.1973 | 0.1969 | 0.1913 | 0.1957 | 0.1975 | 0.2274 | 0.1898 |
| 0.1734 | 0.1674 | 0.1747 | 0.1637 | 0.1638 | 0.1701 | 0.1678 | 0.1764 | 0.1502 |
| 0.2092 | 0.2141 | 0.2252 | 0.2176 | 0.1827 | 0.2021 | 0.1941 | 0.2177 | 0.2022 |
| 0.178  | 0.1809 | 0.1829 | 0.1968 | 0.1815 | 0.2039 | 0.2316 | 0.2816 | 0.2643 |
| 0.1923 | 0.2069 | 0.2056 | 0.211  | 0.1959 | 0.1937 | 0.2093 | 0.2254 | 0.2035 |
| 0.1148 | 0.1177 | 0.1274 | 0.125  | 0.1217 | 0.1147 | 0.1078 | 0.108  | 0.1027 |
| 0.1574 | 0.1614 | 0.1551 | 0.153  | 0.1471 | 0.1569 | 0.1629 | 0.1809 | 0.1599 |
| 0.1446 | 0.1457 | 0.1491 | 0.1474 | 0.1377 | 0.1433 | 0.1484 | 0.1634 | 0.1476 |
| 0.1696 | 0.1743 | 0.1658 | 0.1715 | 0.1587 | 0.1646 | 0.1696 | 0.1846 | 0.1794 |
| 0.1626 | 0.1655 | 0.1605 | 0.1516 | 0.1488 | 0.1415 | 0.1375 | 0.1483 | 0.1294 |
| 0.1167 | 0.1445 | 0.1474 | 0.1396 | 0.1367 | 0.1457 | 0.1576 | 0.1995 | 0.156  |
| 0.1144 | 0.1238 | 0.1196 | 0.1217 | 0.1269 | 0.1279 | 0.1296 | 0.1545 | 0.1245 |
| 0.1132 | 0.1078 | 0.102  | 0.1035 | 0.0978 | 0.0981 | 0.1044 | 0.1099 | 0.1014 |



|        |        |        |        |        |        |        |        |        |
|--------|--------|--------|--------|--------|--------|--------|--------|--------|
| 0.1493 | 0.1548 | 0.16   | 0.158  | 0.1398 | 0.1316 | 0.1422 | 0.1344 | 0.1183 |
| 0.1711 | 0.1667 | 0.1702 | 0.1633 | 0.1496 | 0.1581 | 0.1546 | 0.1562 | 0.1503 |
| 0.1764 | 0.1747 | 0.1606 | 0.1512 | 0.1449 | 0.1466 | 0.1429 | 0.1508 | 0.1446 |
| 0.1719 | 0.1733 | 0.1725 | 0.166  | 0.1519 | 0.1524 | 0.1506 | 0.1606 | 0.1528 |
| 0.1095 | 0.113  | 0.1093 | 0.1051 | 0.1019 | 0.1041 | 0.1086 | 0.1206 | 0.0949 |
| 0.0975 | 0.1076 | 0.1098 | 0.101  | 0.0953 | 0.0884 | 0.0958 | 0.0992 | 0.0832 |
| 0.1769 | 0.1775 | 0.1724 | 0.1645 | 0.1554 | 0.1497 | 0.1579 | 0.1617 | 0.154  |
| 0.1812 | 0.1864 | 0.1868 | 0.2013 | 0.1751 | 0.1644 | 0.1655 | 0.1763 | 0.1703 |
| 0.1727 | 0.1584 | 0.164  | 0.1497 | 0.1356 | 0.1417 | 0.1434 | 0.1488 | 0.14   |
| 0.1324 | 0.1366 | 0.1256 | 0.1195 | 0.1262 | 0.1178 | 0.1283 | 0.1184 | 0.1256 |
| 0.1819 | 0.1754 | 0.17   | 0.1665 | 0.1525 | 0.145  | 0.1571 | 0.1645 | 0.1489 |
| 0.2025 | 0.2185 | 0.2189 | 0.2026 | 0.1901 | 0.2001 | 0.1938 | 0.2083 | 0.2051 |
| 0.1821 | 0.1873 | 0.1909 | 0.1854 | 0.179  | 0.1727 | 0.1687 | 0.1907 | 0.169  |
| 0.1916 | 0.2021 | 0.2086 | 0.2086 | 0.2053 | 0.2266 | 0.2251 | 0.2714 | 0.2153 |
| 0.0468 | 0.049  | 0.0483 | 0.052  | 0.0492 | 0.0566 | 0.0588 | 0.071  | 0.0575 |
| 0.0966 | 0.1014 | 0.1038 | 0.1084 | 0.0995 | 0.1075 | 0.1057 | 0.1294 | 0.1149 |
| 0.07   | 0.0737 | 0.074  | 0.0783 | 0.0731 | 0.0781 | 0.0798 | 0.0925 | 0.0836 |
| 0.0742 | 0.0744 | 0.0694 | 0.066  | 0.0654 | 0.0662 | 0.0679 | 0.0773 | 0.0654 |
| 0.0219 | 0.0221 | 0.0226 | 0.0225 | 0.021  | 0.0222 | 0.0233 | 0.0243 | 0.0216 |
| 0.0027 | 0.0028 | 0.0023 | 0.0023 | 0.0019 | 0.0021 | 0.0021 | 0.0028 | 0.0025 |
| 0      | 0      | 0      | 0      | 0      | 0      | 0      | 0      | 0      |
| 0      | 0      | 0      | 0      | 0      | 0      | 0      | 0      | 0      |
| 0.0039 | 0.004  | 0.004  | 0.004  | 0.004  | 0.0043 | 0.0043 | 0.0049 | 0.0042 |
| 0.0018 | 0.002  | 0.002  | 0.002  | 0.0019 | 0.0022 | 0.0023 | 0.0026 | 0.0019 |
| 0      | 0      | 0      | 0      | 0      | 0      | 0      | 0      | 0      |
| 0      | 0      | 0      | 0      | 0      | 0      | 0      | 0      | 0      |
| 0.0048 | 0.0055 | 0.0056 | 0.0063 | 0.0056 | 0.0068 | 0.0063 | 0.0071 | 0.0057 |
| 0.0186 | 0.021  | 0.0219 | 0.0222 | 0.0163 | 0.0186 | 0.0168 | 0.0217 | 0.0194 |
| 0.043  | 0.0465 | 0.043  | 0.0457 | 0.0445 | 0.0468 | 0.0498 | 0.057  | 0.0564 |
| 0.0427 | 0.0452 | 0.0441 | 0.0473 | 0.0404 | 0.0418 | 0.0405 | 0.0472 | 0.0409 |
| 0.1913 | 0.2041 | 0.1901 | 0.2157 | 0.2011 | 0.2213 | 0.2147 | 0.2585 | 0.2098 |
| 0.0521 | 0.0532 | 0.0525 | 0.0565 | 0.053  | 0.0546 | 0.0525 | 0.0629 | 0.0569 |
| 0      | 0      | 0      | 0      | 0      | 0      | 0      | 0      | 0      |
| 0.0582 | 0.0589 | 0.0586 | 0.0594 | 0.0565 | 0.0569 | 0.062  | 0.0766 | 0.0627 |
| 0.1648 | 0.1722 | 0.1806 | 0.1886 | 0.184  | 0.1893 | 0.1879 | 0.2308 | 0.1826 |
| 0.2034 | 0.2171 | 0.208  | 0.1998 | 0.1917 | 0.2098 | 0.2231 | 0.2701 | 0.2242 |
| 0.1534 | 0.1783 | 0.1836 | 0.2001 | 0.198  | 0.199  | 0.2103 | 0.2687 | 0.2044 |
| 0.1393 | 0.1515 | 0.1498 | 0.1576 | 0.1632 | 0.1811 | 0.1832 | 0.2105 | 0.1743 |
| 0.1316 | 0.1263 | 0.1188 | 0.1056 | 0.1089 | 0.1139 | 0.1172 | 0.1205 | 0.1038 |
| 0.1639 | 0.1727 | 0.162  | 0.161  | 0.1442 | 0.1496 | 0.1511 | 0.1837 | 0.1868 |
| 0.1824 | 0.1915 | 0.1872 | 0.1877 | 0.1691 | 0.1789 | 0.1861 | 0.2148 | 0.1878 |
| 0.207  | 0.2125 | 0.2111 | 0.2043 | 0.1947 | 0.1958 | 0.192  | 0.1963 | 0.1764 |
| 0.15   | 0.1467 | 0.1492 | 0.1414 | 0.1428 | 0.1346 | 0.1199 | 0.1156 | 0.1086 |
| 0.1554 | 0.1643 | 0.1667 | 0.1693 | 0.1539 | 0.1514 | 0.166  | 0.1818 | 0.1504 |

|        |        |        |        |        |        |        |        |        |
|--------|--------|--------|--------|--------|--------|--------|--------|--------|
| 0.1242 | 0.1383 | 0.1425 | 0.1387 | 0.1417 | 0.1596 | 0.1678 | 0.1922 | 0.1569 |
| 0.1679 | 0.1773 | 0.1882 | 0.17   | 0.1669 | 0.1705 | 0.173  | 0.1953 | 0.1599 |
| 0.1707 | 0.1778 | 0.1773 | 0.1803 | 0.1713 | 0.178  | 0.1741 | 0.2018 | 0.1682 |
| 0.1772 | 0.1785 | 0.1754 | 0.1764 | 0.1649 | 0.1942 | 0.1935 | 0.2348 | 0.179  |
| 0.1464 | 0.1553 | 0.1527 | 0.1624 | 0.165  | 0.1702 | 0.1705 | 0.2092 | 0.1715 |
| 0.1396 | 0.1353 | 0.1382 | 0.1384 | 0.1236 | 0.1236 | 0.1262 | 0.1349 | 0.1269 |
| 0.1808 | 0.1917 | 0.1897 | 0.196  | 0.1844 | 0.199  | 0.2135 | 0.2526 | 0.2256 |
| 0.1707 | 0.1815 | 0.1806 | 0.1874 | 0.1767 | 0.1702 | 0.1738 | 0.1913 | 0.1691 |
| 0.1132 | 0.1167 | 0.118  | 0.1102 | 0.1088 | 0.1158 | 0.1169 | 0.1192 | 0.1031 |
| 0.1436 | 0.1425 | 0.1422 | 0.14   | 0.1316 | 0.1331 | 0.1411 | 0.1528 | 0.1289 |
| 0.1309 | 0.1279 | 0.132  | 0.1247 | 0.1247 | 0.1202 | 0.1279 | 0.1541 | 0.1323 |
| 0.1649 | 0.1588 | 0.1649 | 0.1699 | 0.1575 | 0.1493 | 0.1574 | 0.1663 | 0.1499 |
| 0.137  | 0.1358 | 0.1238 | 0.1257 | 0.1138 | 0.1191 | 0.123  | 0.1373 | 0.1235 |
| 0.1736 | 0.1698 | 0.1773 | 0.1683 | 0.1487 | 0.1516 | 0.1652 | 0.1725 | 0.1582 |
| 0.1687 | 0.1793 | 0.1902 | 0.1984 | 0.1917 | 0.2052 | 0.2138 | 0.246  | 0.2492 |
| 0.2203 | 0.2132 | 0.1998 | 0.1899 | 0.1688 | 0.1714 | 0.1669 | 0.1848 | 0.1801 |
| 0.1229 | 0.1361 | 0.1336 | 0.131  | 0.1194 | 0.1271 | 0.1333 | 0.1466 | 0.1427 |
| 0.2077 | 0.2108 | 0.212  | 0.2162 | 0.1952 | 0.2039 | 0.2188 | 0.2418 | 0.2184 |
| 0.1815 | 0.1825 | 0.1888 | 0.1742 | 0.1845 | 0.1883 | 0.1973 | 0.223  | 0.1849 |
| 0.0713 | 0.0738 | 0.0745 | 0.0708 | 0.0716 | 0.0756 | 0.0751 | 0.0829 | 0.0723 |
| 0.0618 | 0.0676 | 0.0663 | 0.0725 | 0.0661 | 0.0676 | 0.0703 | 0.0814 | 0.0748 |
| 0.067  | 0.0698 | 0.0675 | 0.0699 | 0.0638 | 0.0718 | 0.0699 | 0.0806 | 0.0676 |
| 0.0754 | 0.0776 | 0.0773 | 0.0792 | 0.0783 | 0.0855 | 0.0855 | 0.0997 | 0.0805 |
| 0.04   | 0.042  | 0.0423 | 0.0428 | 0.0384 | 0.0393 | 0.0392 | 0.0452 | 0.0398 |
| 0.0123 | 0.0128 | 0.0109 | 0.012  | 0.0108 | 0.0115 | 0.0132 | 0.0141 | 0.0147 |
| 0.0099 | 0.011  | 0.0112 | 0.0121 | 0.0121 | 0.0128 | 0.0131 | 0.0158 | 0.0112 |
| 0      | 0      | 0      | 0      | 0      | 0      | 0      | 0      | 0      |
| 0      | 0      | 0      | 0      | 0      | 0      | 0      | 0      | 0      |
| 0.0028 | 0.003  | 0.0028 | 0.0028 | 0.0028 | 0.0028 | 0.0029 | 0.0033 | 0.0025 |
| 0.002  | 0.0027 | 0.0029 | 0.0034 | 0.0029 | 0.0028 | 0.0029 | 0.0035 | 0.0027 |
| 0.0021 | 0.0025 | 0.0023 | 0.0027 | 0.0029 | 0.0031 | 0.0031 | 0.0039 | 0.0032 |
| 0.0007 | 0.0008 | 0.0008 | 0.0008 | 0.0009 | 0.001  | 0.001  | 0.0013 | 0.001  |
| 0.0051 | 0.0053 | 0.0053 | 0.0053 | 0.0045 | 0.0048 | 0.0047 | 0.0058 | 0.0048 |
| 0.0172 | 0.019  | 0.0186 | 0.0191 | 0.0174 | 0.0196 | 0.0213 | 0.0236 | 0.0218 |
| 0.0232 | 0.0248 | 0.0243 | 0.0264 | 0.0228 | 0.0279 | 0.0254 | 0.0307 | 0.0317 |
| 0.031  | 0.0325 | 0.0293 | 0.0307 | 0.0255 | 0.0292 | 0.027  | 0.0338 | 0.0301 |
| 0.07   | 0.0639 | 0.0692 | 0.0857 | 0.0851 | 0.0862 | 0.0862 | 0.1117 | 0.1082 |
| 0.0388 | 0.0396 | 0.0377 | 0.043  | 0.0425 | 0.0431 | 0.0425 | 0.0535 | 0.047  |
| 0      | 0      | 0      | 0      | 0      | 0      | 0      | 0      | 0      |
| 0.0369 | 0.0375 | 0.0397 | 0.0395 | 0.0398 | 0.0451 | 0.0464 | 0.0532 | 0.0427 |
| 0.1164 | 0.1307 | 0.1338 | 0.1396 | 0.1391 | 0.149  | 0.151  | 0.1757 | 0.1438 |
| 0.1225 | 0.1277 | 0.1282 | 0.1408 | 0.1421 | 0.1456 | 0.1485 | 0.1678 | 0.1432 |
| 0.1316 | 0.1354 | 0.1358 | 0.1406 | 0.1408 | 0.1509 | 0.1469 | 0.1758 | 0.1381 |
| 0.1587 | 0.1646 | 0.1681 | 0.173  | 0.1636 | 0.1794 | 0.1821 | 0.2134 | 0.1805 |

|        |        |        |        |        |        |        |        |        |
|--------|--------|--------|--------|--------|--------|--------|--------|--------|
| 0.1893 | 0.1908 | 0.193  | 0.19   | 0.183  | 0.1948 | 0.2026 | 0.2321 | 0.1918 |
| 0.1382 | 0.1436 | 0.1424 | 0.1437 | 0.1349 | 0.1242 | 0.1388 | 0.1424 | 0.1268 |
| 0.1397 | 0.1411 | 0.1342 | 0.1147 | 0.1214 | 0.1119 | 0.1097 | 0.1126 | 0.1073 |
| 0.1053 | 0.1113 | 0.1126 | 0.1037 | 0.1118 | 0.1199 | 0.1188 | 0.1278 | 0.1212 |
| 0.2188 | 0.2158 | 0.2037 | 0.2034 | 0.179  | 0.1904 | 0.1929 | 0.1991 | 0.1865 |
| 0.0903 | 0.0924 | 0.0965 | 0.0909 | 0.0893 | 0.0968 | 0.1051 | 0.104  | 0.0969 |
| 0.1442 | 0.1625 | 0.1588 | 0.1607 | 0.1436 | 0.165  | 0.158  | 0.1872 | 0.1408 |
| 0.1875 | 0.1964 | 0.1979 | 0.2111 | 0.2125 | 0.2168 | 0.2161 | 0.2755 | 0.2058 |
| 0.0996 | 0.1344 | 0.1323 | 0.145  | 0.1492 | 0.167  | 0.1775 | 0.2191 | 0.1757 |
| 0.1776 | 0.1878 | 0.1772 | 0.1699 | 0.1714 | 0.1573 | 0.1739 | 0.2124 | 0.1673 |
| 0.1585 | 0.1607 | 0.1493 | 0.1465 | 0.1406 | 0.1621 | 0.1627 | 0.2166 | 0.1716 |
| 0.1749 | 0.1832 | 0.1833 | 0.1854 | 0.1805 | 0.1832 | 0.1934 | 0.2191 | 0.1633 |
| 0.128  | 0.1334 | 0.1325 | 0.1326 | 0.1259 | 0.131  | 0.1374 | 0.1542 | 0.1334 |
| 0.1465 | 0.1489 | 0.1456 | 0.139  | 0.1304 | 0.1347 | 0.1337 | 0.1447 | 0.1292 |
| 0.159  | 0.1559 | 0.1545 | 0.1569 | 0.1482 | 0.1504 | 0.1598 | 0.1658 | 0.1516 |
| 0.1391 | 0.143  | 0.1423 | 0.1406 | 0.1358 | 0.1333 | 0.1373 | 0.149  | 0.1417 |
| 0.1855 | 0.1847 | 0.1899 | 0.1901 | 0.1659 | 0.174  | 0.1597 | 0.1937 | 0.1768 |
| 0.169  | 0.1654 | 0.1513 | 0.1372 | 0.1288 | 0.1332 | 0.1327 | 0.1336 | 0.1293 |
| 0.1508 | 0.1515 | 0.1599 | 0.1451 | 0.1419 | 0.1348 | 0.1338 | 0.1434 | 0.1337 |
| 0.1718 | 0.1793 | 0.1651 | 0.1765 | 0.1571 | 0.1559 | 0.1553 | 0.1749 | 0.1495 |
| 0.217  | 0.2054 | 0.2021 | 0.1944 | 0.1763 | 0.195  | 0.1949 | 0.2241 | 0.2024 |
| 0.1583 | 0.1586 | 0.1616 | 0.1646 | 0.1499 | 0.1589 | 0.166  | 0.1811 | 0.1647 |
| 0.183  | 0.1819 | 0.18   | 0.1792 | 0.1751 | 0.1889 | 0.1984 | 0.219  | 0.1976 |
| 0.1764 | 0.1815 | 0.1848 | 0.1843 | 0.1798 | 0.1893 | 0.1916 | 0.2088 | 0.1869 |
| 0.1597 | 0.1695 | 0.1807 | 0.1844 | 0.1906 | 0.1861 | 0.1877 | 0.2096 | 0.1533 |
| 0.0834 | 0.0867 | 0.0901 | 0.0849 | 0.085  | 0.0858 | 0.0869 | 0.0974 | 0.0884 |
| 0.0574 | 0.0554 | 0.0541 | 0.0546 | 0.0485 | 0.0483 | 0.0521 | 0.0636 | 0.0615 |
| 0.1135 | 0.1158 | 0.1186 | 0.118  | 0.1092 | 0.1171 | 0.1158 | 0.1443 | 0.1136 |
| 0.166  | 0.1839 | 0.1801 | 0.1868 | 0.1945 | 0.1922 | 0.2007 | 0.2421 | 0.1789 |
| 0.0382 | 0.0398 | 0.0386 | 0.0385 | 0.0397 | 0.0432 | 0.0446 | 0.0538 | 0.0418 |
| 0.0061 | 0.0069 | 0.0047 | 0.0067 | 0.0029 | 0.0076 | 0.0085 | 0.0122 | 0.0113 |
| 0.0162 | 0.0163 | 0.0154 | 0.0145 | 0.0138 | 0.0139 | 0.0139 | 0.0148 | 0.0122 |
| 0      | 0      | 0      | 0      | 0      | 0      | 0      | 0      | 0      |
| 0      | 0      | 0      | 0      | 0      | 0      | 0      | 0      | 0      |
| 0.0015 | 0.0017 | 0.0015 | 0.0016 | 0.0015 | 0.0015 | 0.0017 | 0.0019 | 0.0018 |
| 0.0038 | 0.0044 | 0.0042 | 0.005  | 0.004  | 0.0043 | 0.0042 | 0.0053 | 0.0054 |
| 0      | 0      | 0      | 0      | 0      | 0      | 0      | 0      | 0      |
| 0      | 0      | 0      | 0      | 0      | 0      | 0      | 0      | 0      |
| 0      | 0      | 0      | 0      | 0      | 0      | 0      | 0      | 0      |
| 0.0016 | 0.0016 | 0.0016 | 0.0014 | 0.0014 | 0.0012 | 0.0013 | 0.0013 | 0.0011 |
| 0.0018 | 0.0018 | 0.0021 | 0.0018 | 0.0019 | 0.0017 | 0.0017 | 0.0017 | 0.0013 |
| 0.0036 | 0.0033 | 0.0034 | 0.0033 | 0.003  | 0.003  | 0.0032 | 0.0029 | 0.0029 |
| 0.0115 | 0.0123 | 0.0123 | 0.0129 | 0.0137 | 0.0156 | 0.0153 | 0.0189 | 0.014  |
| 0.0066 | 0.0064 | 0.006  | 0.0057 | 0.0058 | 0.0055 | 0.0062 | 0.0075 | 0.0063 |





|        |        |        |        |        |        |        |        |        |
|--------|--------|--------|--------|--------|--------|--------|--------|--------|
| 0      | 0      | 0      | 0      | 0      | 0      | 0      | 0      | 0      |
| 0      | 0      | 0      | 0      | 0      | 0      | 0      | 0      | 0      |
| 0.0018 | 0.002  | 0.0018 | 0.0018 | 0.0018 | 0.0018 | 0.0017 | 0.0019 | 0.0015 |
| 0.0016 | 0.0017 | 0.0018 | 0.0018 | 0.0018 | 0.0017 | 0.0018 | 0.002  | 0.0018 |
| 0.0038 | 0.0039 | 0.0037 | 0.0036 | 0.0037 | 0.0038 | 0.0037 | 0.0043 | 0.0037 |
| 0.0008 | 0.0009 | 0.001  | 0.001  | 0.001  | 0.0011 | 0.0011 | 0.0014 | 0.0011 |
| 0.001  | 0.001  | 0.001  | 0.0009 | 0.0008 | 0.0009 | 0.001  | 0.0012 | 0.0008 |
| 0.0064 | 0.0072 | 0.0082 | 0.0094 | 0.0087 | 0.0091 | 0.0087 | 0.0101 | 0.0109 |
| 0.0089 | 0.0087 | 0.0103 | 0.0095 | 0.0086 | 0.0085 | 0.01   | 0.0116 | 0.0106 |
| 0.0034 | 0.0045 | 0.0038 | 0.0055 | 0.0047 | 0.0045 | 0.0045 | 0.0053 | 0.0056 |
| 0.019  | 0.0164 | 0.0172 | 0.0175 | 0.0136 | 0.0193 | 0.0131 | 0.0182 | 0.0146 |
| 0.0136 | 0.0153 | 0.0181 | 0.0172 | 0.016  | 0.0178 | 0.0193 | 0.0219 | 0.0151 |
| 0.0055 | 0.0064 | 0.0069 | 0.0075 | 0.0072 | 0.007  | 0.0074 | 0.009  | 0.0073 |
| 0.0571 | 0.063  | 0.06   | 0.0641 | 0.0601 | 0.0634 | 0.0766 | 0.0845 | 0.0815 |
| 0.1391 | 0.154  | 0.1691 | 0.1647 | 0.1538 | 0.1688 | 0.1691 | 0.1811 | 0.1544 |
| 0.0811 | 0.0864 | 0.0917 | 0.102  | 0.0823 | 0.0843 | 0.0834 | 0.0951 | 0.0847 |
| 0.0647 | 0.0656 | 0.0627 | 0.0642 | 0.0576 | 0.0651 | 0.067  | 0.0761 | 0.0663 |
| 0.0757 | 0.0874 | 0.084  | 0.0771 | 0.0799 | 0.0917 | 0.0972 | 0.122  | 0.0889 |
| 0.1709 | 0.1811 | 0.1793 | 0.1817 | 0.1788 | 0.1921 | 0.1904 | 0.2285 | 0.1843 |
| 0.1414 | 0.142  | 0.138  | 0.1409 | 0.1398 | 0.1483 | 0.1503 | 0.1832 | 0.1516 |
| 0.1085 | 0.1099 | 0.1101 | 0.1076 | 0.1017 | 0.1028 | 0.1118 | 0.1229 | 0.1066 |
| 0.2124 | 0.2121 | 0.2113 | 0.2191 | 0.1904 | 0.1865 | 0.2013 | 0.2275 | 0.2303 |
| 0.321  | 0.3059 | 0.2456 | 0.2616 | 0.2413 | 0.2538 | 0.2666 | 0.3035 | 0.2586 |
| 0.1902 | 0.1944 | 0.1819 | 0.2035 | 0.1794 | 0.1936 | 0.1748 | 0.2078 | 0.1877 |
| 0.178  | 0.1785 | 0.1682 | 0.173  | 0.1497 | 0.1511 | 0.1623 | 0.1868 | 0.1681 |
| 0.2179 | 0.2362 | 0.2193 | 0.2502 | 0.1904 | 0.1917 | 0.2023 | 0.2436 | 0.2439 |
| 0.4062 | 0.3783 | 0.3415 | 0.3094 | 0.189  | 0.2449 | 0.2199 | 0.2568 | 0.2745 |
| 0.2326 | 0.2433 | 0.2545 | 0.2882 | 0.2174 | 0.2128 | 0.2352 | 0.2656 | 0.2214 |
| 0.1592 | 0.1638 | 0.1686 | 0.1589 | 0.1468 | 0.1529 | 0.158  | 0.1704 | 0.1564 |
| 0.1948 | 0.1929 | 0.2038 | 0.2335 | 0.2003 | 0.2086 | 0.1655 | 0.2098 | 0.2151 |
| 0.3489 | 0.3781 | 0.3727 | 0.4237 | 0.4162 | 0.4287 | 0.4072 | 0.4175 | 0.3873 |
| 0.2666 | 0.2664 | 0.2795 | 0.3678 | 0.2381 | 0.2338 | 0.2267 | 0.3093 | 0.2835 |
| 0.1908 | 0.1921 | 0.2002 | 0.2207 | 0.1962 | 0.1735 | 0.1946 | 0.2376 | 0.2127 |
| 0.326  | 0.3449 | 0.3547 | 0.3764 | 0.3449 | 0.3501 | 0.3351 | 0.344  | 0.3024 |
| 0.2267 | 0.2327 | 0.2398 | 0.2584 | 0.2857 | 0.3048 | 0.2954 | 0.3319 | 0.3513 |
| 0.372  | 0.3934 | 0.3295 | 0.4207 | 0.3247 | 0.2812 | 0.2821 | 0.4043 | 0.3819 |
| 0.4101 | 0.422  | 0.4193 | 0.4798 | 0.3654 | 0.3973 | 0.3666 | 0.5098 | 0.4567 |
| 0.2887 | 0.278  | 0.2825 | 0.3239 | 0.3144 | 0.3912 | 0.3807 | 0.4648 | 0.3998 |
| 0.2982 | 0.4256 | 0.3695 | 0.3928 | 0.3436 | 0.333  | 0.2731 | 0.3239 | 0.2861 |
| 0.2202 | 0.2597 | 0.2301 | 0.2259 | 0.1888 | 0.2181 | 0.2108 | 0.2343 | 0.2365 |
| 0.1184 | 0.12   | 0.1202 | 0.1155 | 0.1101 | 0.1106 | 0.1112 | 0.1276 | 0.113  |
| 0.0646 | 0.0658 | 0.0653 | 0.0613 | 0.0605 | 0.0649 | 0.0641 | 0.0719 | 0.0553 |
| 0.0567 | 0.0584 | 0.0645 | 0.0682 | 0.0632 | 0.0673 | 0.0692 | 0.0896 | 0.0646 |
| 0.1536 | 0.147  | 0.1391 | 0.1511 | 0.1655 | 0.1652 | 0.1489 | 0.1854 | 0.1371 |

|        |        |        |        |        |        |        |        |        |
|--------|--------|--------|--------|--------|--------|--------|--------|--------|
| 0.1241 | 0.1369 | 0.1315 | 0.1408 | 0.1439 | 0.1517 | 0.1587 | 0.1796 | 0.1415 |
| 0.0034 | 0.0037 | 0.0039 | 0.0037 | 0.0035 | 0.0035 | 0.0036 | 0.0041 | 0.0033 |
| 0.0212 | 0.0219 | 0.0222 | 0.0226 | 0.0204 | 0.0212 | 0.0217 | 0.0281 | 0.0245 |
| 0.1162 | 0.1268 | 0.1264 | 0.1356 | 0.1267 | 0.1361 | 0.1452 | 0.1741 | 0.1459 |
| 0.0608 | 0.0612 | 0.0619 | 0.0643 | 0.0572 | 0.0488 | 0.0538 | 0.0758 | 0.0647 |
| 0.0158 | 0.0167 | 0.0168 | 0.0173 | 0.0164 | 0.017  | 0.0178 | 0.0209 | 0.0173 |
| 0      | 0      | 0      | 0      | 0      | 0      | 0      | 0      | 0      |
| 0      | 0      | 0      | 0      | 0      | 0      | 0      | 0      | 0      |
| 0.0016 | 0.0016 | 0.0016 | 0.0015 | 0.0015 | 0.0015 | 0.0014 | 0.0017 | 0.0014 |
| 0.0017 | 0.0018 | 0.0018 | 0.0017 | 0.0018 | 0.0018 | 0.0019 | 0.0022 | 0.0018 |
| 0.0029 | 0.0031 | 0.0031 | 0.0037 | 0.0035 | 0.004  | 0.0038 | 0.0047 | 0.0042 |
| 0.0013 | 0.0014 | 0.0013 | 0.0014 | 0.0014 | 0.0015 | 0.0016 | 0.0018 | 0.0014 |
| 0.0031 | 0.0034 | 0.0034 | 0.0037 | 0.0034 | 0.0035 | 0.0033 | 0.004  | 0.0034 |
| 0.0076 | 0.0071 | 0.0051 | 0.0057 | 0.0038 | 0.0043 | 0.0042 | 0.006  | 0.0051 |
| 0.0044 | 0.0047 | 0.006  | 0.007  | 0.0062 | 0.0078 | 0.0075 | 0.0099 | 0.0081 |
| 0.0033 | 0.0045 | 0.0042 | 0.0046 | 0.0046 | 0.0059 | 0.0068 | 0.0077 | 0.0068 |
| 0.0201 | 0.0198 | 0.0202 | 0.0201 | 0.0201 | 0.0235 | 0.0238 | 0.0257 | 0.0205 |
| 0      | 0      | 0      | 0      | 0      | 0      | 0      | 0      | 0      |
| 0.0147 | 0.0156 | 0.0155 | 0.0174 | 0.0158 | 0.0152 | 0.0151 | 0.0171 | 0.0142 |
| 0.0619 | 0.0665 | 0.0594 | 0.0676 | 0.0702 | 0.0684 | 0.068  | 0.0767 | 0.068  |
| 0.0851 | 0.0924 | 0.0957 | 0.1002 | 0.0937 | 0.0941 | 0.1034 | 0.1149 | 0.0993 |
| 0.0878 | 0.0958 | 0.0927 | 0.0951 | 0.092  | 0.1021 | 0.1066 | 0.1253 | 0.1017 |
| 0.0864 | 0.0887 | 0.0897 | 0.0918 | 0.0858 | 0.0922 | 0.0941 | 0.1151 | 0.0977 |
| 0.1273 | 0.1337 | 0.1367 | 0.1402 | 0.132  | 0.1345 | 0.1358 | 0.1597 | 0.1344 |
| 0.158  | 0.1551 | 0.1618 | 0.1652 | 0.1529 | 0.1705 | 0.1711 | 0.1986 | 0.164  |
| 0.1492 | 0.157  | 0.1605 | 0.1723 | 0.1627 | 0.1732 | 0.1761 | 0.2073 | 0.164  |
| 0.1722 | 0.1718 | 0.1761 | 0.1603 | 0.1646 | 0.1635 | 0.1805 | 0.2139 | 0.1703 |
| 0.1094 | 0.1155 | 0.1138 | 0.1179 | 0.1147 | 0.1181 | 0.1159 | 0.1362 | 0.1185 |
| 0.2383 | 0.2643 | 0.2589 | 0.2836 | 0.2454 | 0.2881 | 0.3094 | 0.3528 | 0.3188 |
| 0.2521 | 0.2599 | 0.2822 | 0.2865 | 0.2634 | 0.2741 | 0.2679 | 0.282  | 0.2595 |
| 0.2013 | 0.2141 | 0.2319 | 0.2305 | 0.2034 | 0.2068 | 0.1987 | 0.2215 | 0.2078 |
| 0.1437 | 0.1587 | 0.1482 | 0.1524 | 0.1398 | 0.1348 | 0.1309 | 0.1611 | 0.169  |
| 0.1668 | 0.2189 | 0.2045 | 0.2182 | 0.165  | 0.2039 | 0.229  | 0.2641 | 0.2362 |
| 0.1507 | 0.171  | 0.1685 | 0.1642 | 0.1486 | 0.133  | 0.1393 | 0.1584 | 0.1403 |
| 0.1606 | 0.16   | 0.1619 | 0.1646 | 0.1499 | 0.1505 | 0.1574 | 0.1634 | 0.1578 |
| 0.1365 | 0.1347 | 0.1366 | 0.1349 | 0.1212 | 0.1195 | 0.1191 | 0.1326 | 0.1197 |
| 0.1283 | 0.1435 | 0.1315 | 0.1352 | 0.1339 | 0.139  | 0.1538 | 0.1496 | 0.1295 |
| 0.138  | 0.1663 | 0.1641 | 0.1753 | 0.1558 | 0.1837 | 0.1728 | 0.2205 | 0.1787 |
| 0.226  | 0.2585 | 0.2624 | 0.2873 | 0.2172 | 0.2677 | 0.2165 | 0.2906 | 0.2726 |
| 0.2176 | 0.1557 | 0.1578 | 0.1351 | 0.0557 | 0.0889 | 0.0945 | 0.1718 | 0.1609 |
| 0.1926 | 0.2053 | 0.233  | 0.2452 | 0.1901 | 0.2095 | 0.2357 | 0.2864 | 0.2986 |
| 0.2011 | 0.1887 | 0.1982 | 0.2501 | 0.2135 | 0.1945 | 0.203  | 0.2696 | 0.2319 |
| 0.1642 | 0.1637 | 0.1947 | 0.2571 | 0.2359 | 0.2365 | 0.2577 | 0.3014 | 0.2357 |
| 0.3464 | 0.4089 | 0.3815 | 0.4247 | 0.3103 | 0.3604 | 0.3465 | 0.3983 | 0.3918 |

|        |        |        |        |        |        |        |        |        |
|--------|--------|--------|--------|--------|--------|--------|--------|--------|
| 0.4368 | 0.3663 | 0.3712 | 0.3657 | 0.2599 | 0.2906 | 0.2529 | 0.3025 | 0.3002 |
| 0.1818 | 0.1792 | 0.1775 | 0.1763 | 0.1516 | 0.161  | 0.1706 | 0.194  | 0.164  |
| 0.0909 | 0.094  | 0.0983 | 0.0967 | 0.0975 | 0.0996 | 0.1072 | 0.1192 | 0.0981 |
| 0.1032 | 0.1199 | 0.1185 | 0.1239 | 0.1137 | 0.1219 | 0.125  | 0.1495 | 0.1119 |
| 0.133  | 0.1659 | 0.1616 | 0.1757 | 0.1935 | 0.1904 | 0.2117 | 0.2585 | 0.1896 |
| 0.159  | 0.1746 | 0.1773 | 0.1855 | 0.1726 | 0.1953 | 0.1911 | 0.234  | 0.1799 |
| 0.0442 | 0.0475 | 0.0449 | 0.047  | 0.046  | 0.0491 | 0.0497 | 0.0592 | 0.047  |
| 0.0033 | 0.0035 | 0.0037 | 0.0031 | 0.0029 | 0.003  | 0.0029 | 0.0027 | 0.0025 |
| 0.0267 | 0.0286 | 0.029  | 0.0303 | 0.0293 | 0.0288 | 0.0315 | 0.0349 | 0.0305 |
| 0.0632 | 0.0644 | 0.0603 | 0.0657 | 0.0541 | 0.0577 | 0.0494 | 0.0599 | 0.0555 |
| 0.0292 | 0.0285 | 0.0347 | 0.0366 | 0.0274 | 0.0332 | 0.043  | 0.0672 | 0.0692 |
| 0.004  | 0.0038 | 0.0039 | 0.0039 | 0.004  | 0.004  | 0.0041 | 0.0039 | 0.0039 |
| 0      | 0      | 0      | 0      | 0      | 0      | 0      | 0      | 0      |
| 0      | 0      | 0      | 0      | 0      | 0      | 0      | 0      | 0      |
| 0.0008 | 0.0007 | 0.0008 | 0.0007 | 0.0007 | 0.0006 | 0.0006 | 0.0007 | 0.0006 |
| 0.0007 | 0.0007 | 0.0007 | 0.0007 | 0.0007 | 0.0007 | 0.0008 | 0.0007 | 0.0007 |
| 0.0008 | 0.0008 | 0.0008 | 0.0008 | 0.0008 | 0.0007 | 0.0007 | 0.0007 | 0.0006 |
| 0.0007 | 0.0008 | 0.0007 | 0.0006 | 0.0006 | 0.0006 | 0.0006 | 0.0007 | 0.0006 |
| 0      | 0      | 0      | 0      | 0      | 0      | 0      | 0      | 0      |
| 0      | 0      | 0      | 0      | 0      | 0      | 0      | 0      | 0      |
| 0      | 0      | 0      | 0      | 0      | 0      | 0      | 0      | 0      |
| 0      | 0      | 0      | 0      | 0      | 0      | 0      | 0      | 0      |
| 0.0008 | 0.0009 | 0.001  | 0.001  | 0.0011 | 0.0011 | 0.0012 | 0.0015 | 0.0013 |
| 0.0035 | 0.0062 | 0.0072 | 0.0069 | 0.0065 | 0.0077 | 0.0084 | 0.0115 | 0.012  |
| 0.0172 | 0.0179 | 0.0175 | 0.0178 | 0.0168 | 0.018  | 0.0183 | 0.0207 | 0.019  |
| 0.0128 | 0.0132 | 0.0131 | 0.0124 | 0.0114 | 0.0116 | 0.0117 | 0.0126 | 0.0108 |
| 0.0765 | 0.0777 | 0.0756 | 0.0786 | 0.0839 | 0.0835 | 0.0841 | 0.1055 | 0.0803 |
| 0.1197 | 0.125  | 0.1236 | 0.1247 | 0.1287 | 0.1435 | 0.1379 | 0.1636 | 0.1357 |
| 0.0741 | 0.0758 | 0.0746 | 0.0764 | 0.073  | 0.0757 | 0.0751 | 0.0841 | 0.0699 |
| 0.0684 | 0.074  | 0.0756 | 0.076  | 0.0826 | 0.0811 | 0.0842 | 0.0977 | 0.0766 |
| 0.0242 | 0.0259 | 0.0264 | 0.0246 | 0.0242 | 0.0258 | 0.0275 | 0.0323 | 0.0252 |
| 0.0945 | 0.0975 | 0.1    | 0.0971 | 0.094  | 0.0997 | 0.1041 | 0.1142 | 0.0946 |
| 0.1343 | 0.1266 | 0.1323 | 0.1211 | 0.1192 | 0.1327 | 0.1264 | 0.1533 | 0.1122 |
| 0.1704 | 0.182  | 0.1764 | 0.1731 | 0.1686 | 0.1804 | 0.1821 | 0.2119 | 0.1712 |
| 0.0984 | 0.0995 | 0.0976 | 0.1013 | 0.0937 | 0.1006 | 0.1014 | 0.1102 | 0.0965 |
| 0.259  | 0.27   | 0.2549 | 0.2688 | 0.1883 | 0.2456 | 0.2361 | 0.3374 | 0.2983 |
| 0.33   | 0.3485 | 0.3285 | 0.327  | 0.3106 | 0.2732 | 0.2765 | 0.3062 | 0.3035 |
| 0.2132 | 0.2189 | 0.2046 | 0.2087 | 0.1887 | 0.1915 | 0.2033 | 0.2238 | 0.2147 |
| 0.2243 | 0.2298 | 0.2366 | 0.2383 | 0.1911 | 0.2028 | 0.1972 | 0.2294 | 0.2284 |
| 0.1952 | 0.1954 | 0.1899 | 0.1867 | 0.1738 | 0.1892 | 0.181  | 0.1902 | 0.1738 |
| 0.1932 | 0.1994 | 0.2017 | 0.1853 | 0.1762 | 0.1799 | 0.1913 | 0.2183 | 0.2    |
| 0.2264 | 0.2514 | 0.2536 | 0.2594 | 0.2314 | 0.2391 | 0.2382 | 0.2618 | 0.2341 |
| 0.2616 | 0.2816 | 0.2503 | 0.2284 | 0.199  | 0.2206 | 0.1919 | 0.2128 | 0.1934 |
| 0.2184 | 0.2321 | 0.2066 | 0.2309 | 0.2017 | 0.1951 | 0.1955 | 0.2255 | 0.2407 |



|        |        |        |        |        |        |        |        |        |
|--------|--------|--------|--------|--------|--------|--------|--------|--------|
| 0.208  | 0.2154 | 0.2049 | 0.2092 | 0.2123 | 0.2408 | 0.2545 | 0.2795 | 0.2617 |
| 0.2188 | 0.2755 | 0.2432 | 0.2564 | 0.2197 | 0.2485 | 0.2457 | 0.2669 | 0.251  |
| 0.16   | 0.1887 | 0.1939 | 0.2243 | 0.1851 | 0.2008 | 0.1895 | 0.2191 | 0.1831 |
| 0.2339 | 0.2363 | 0.2023 | 0.1864 | 0.1664 | 0.1574 | 0.1632 | 0.1797 | 0.1599 |
| 0.2767 | 0.2832 | 0.2515 | 0.2381 | 0.2136 | 0.2499 | 0.205  | 0.2269 | 0.2392 |
| 0.1981 | 0.2234 | 0.2298 | 0.2334 | 0.2094 | 0.2131 | 0.217  | 0.2706 | 0.2487 |
| 0.2205 | 0.2348 | 0.2262 | 0.2447 | 0.2262 | 0.2303 | 0.2342 | 0.2649 | 0.2395 |
| 0.1081 | 0.1154 | 0.1206 | 0.1181 | 0.1125 | 0.1227 | 0.1268 | 0.1515 | 0.1242 |
| 0.1235 | 0.1332 | 0.1371 | 0.147  | 0.1298 | 0.1382 | 0.1431 | 0.1697 | 0.1418 |
| 0.0987 | 0.099  | 0.0866 | 0.0916 | 0.0832 | 0.0859 | 0.0833 | 0.1075 | 0.0869 |
| 0.0562 | 0.0618 | 0.0618 | 0.0632 | 0.0636 | 0.0663 | 0.0682 | 0.083  | 0.0673 |
| 0.0243 | 0.0252 | 0.0245 | 0.0242 | 0.0242 | 0.027  | 0.0267 | 0.0303 | 0.0255 |
| 0      | 0      | 0      | 0      | 0      | 0      | 0      | 0      | 0      |
| 0.0636 | 0.0645 | 0.0662 | 0.0613 | 0.0578 | 0.0497 | 0.0511 | 0.056  | 0.0484 |
| 0.0588 | 0.0579 | 0.0532 | 0.0501 | 0.0468 | 0.0502 | 0.0533 | 0.0523 | 0.0539 |
| 0.0171 | 0.0183 | 0.0184 | 0.0217 | 0.0185 | 0.0222 | 0.021  | 0.023  | 0.0194 |
| 0.023  | 0.0216 | 0.0197 | 0.0212 | 0.0193 | 0.023  | 0.0237 | 0.0258 | 0.0242 |
| 0.0049 | 0.0053 | 0.0052 | 0.0052 | 0.0048 | 0.0051 | 0.0059 | 0.0079 | 0.0056 |
| 0      | 0      | 0      | 0      | 0      | 0      | 0      | 0      | 0      |
| 0      | 0      | 0      | 0      | 0      | 0      | 0      | 0      | 0      |
| 0      | 0      | 0      | 0      | 0      | 0      | 0      | 0      | 0      |
| 0      | 0      | 0      | 0      | 0      | 0      | 0      | 0      | 0      |
| 0      | 0      | 0      | 0      | 0      | 0      | 0      | 0      | 0      |
| 0      | 0      | 0      | 0      | 0      | 0      | 0      | 0      | 0      |
| 0      | 0      | 0      | 0      | 0      | 0      | 0      | 0      | 0      |
| 0      | 0      | 0      | 0      | 0      | 0      | 0      | 0      | 0      |
| 0      | 0      | 0      | 0      | 0      | 0      | 0      | 0      | 0      |
| 0      | 0      | 0      | 0      | 0      | 0      | 0      | 0      | 0      |
| 0      | 0      | 0      | 0      | 0      | 0      | 0      | 0      | 0      |
| 0.0019 | 0.0019 | 0.0018 | 0.0017 | 0.0017 | 0.0016 | 0.0017 | 0.0019 | 0.0016 |
| 0.0021 | 0.0021 | 0.0021 | 0.0019 | 0.0018 | 0.0018 | 0.0018 | 0.0022 | 0.0019 |
| 0.0048 | 0.0049 | 0.0049 | 0.0048 | 0.0044 | 0.0044 | 0.0044 | 0.0049 | 0.0044 |
| 0.0052 | 0.0055 | 0.0054 | 0.0055 | 0.0056 | 0.0057 | 0.0065 | 0.0069 | 0.006  |
| 0.0078 | 0.0082 | 0.0085 | 0.0083 | 0.0075 | 0.0071 | 0.0082 | 0.0091 | 0.0078 |
| 0.0086 | 0.0093 | 0.0097 | 0.0097 | 0.0098 | 0.0096 | 0.0103 | 0.0119 | 0.0096 |
| 0.008  | 0.009  | 0.0096 | 0.0097 | 0.0107 | 0.0111 | 0.0105 | 0.0123 | 0.01   |
| 0.009  | 0.0096 | 0.009  | 0.0091 | 0.0095 | 0.0094 | 0.0102 | 0.0121 | 0.0097 |
| 0.009  | 0.0094 | 0.0093 | 0.0096 | 0.009  | 0.0102 | 0.0101 | 0.0123 | 0.0103 |
| 0.0934 | 0.1016 | 0.0997 | 0.0984 | 0.0917 | 0.0977 | 0.1009 | 0.1161 | 0.1007 |
| 0.1504 | 0.1519 | 0.1451 | 0.1454 | 0.1394 | 0.1467 | 0.1428 | 0.1703 | 0.1365 |
| 0.1538 | 0.1608 | 0.1536 | 0.154  | 0.1571 | 0.1665 | 0.1684 | 0.1874 | 0.1766 |
| 0.1286 | 0.1292 | 0.1197 | 0.1185 | 0.1185 | 0.1173 | 0.1275 | 0.141  | 0.1277 |
| 0.1416 | 0.1476 | 0.1404 | 0.146  | 0.1339 | 0.1437 | 0.1347 | 0.1607 | 0.137  |
| 0.2558 | 0.2561 | 0.247  | 0.238  | 0.1967 | 0.1992 | 0.1875 | 0.2262 | 0.2033 |
| 0.224  | 0.2227 | 0.2057 | 0.2378 | 0.22   | 0.2538 | 0.2394 | 0.2943 | 0.2473 |

|        |        |        |        |        |        |        |        |        |
|--------|--------|--------|--------|--------|--------|--------|--------|--------|
| 0.3347 | 0.2856 | 0.2846 | 0.3253 | 0.2236 | 0.2584 | 0.239  | 0.2423 | 0.209  |
| 0.1926 | 0.1934 | 0.1798 | 0.1814 | 0.1849 | 0.2034 | 0.2163 | 0.2393 | 0.208  |
| 0.1344 | 0.1223 | 0.1195 | 0.1241 | 0.1132 | 0.1095 | 0.1168 | 0.125  | 0.1111 |
| 0.1904 | 0.1997 | 0.2347 | 0.2276 | 0.1941 | 0.1936 | 0.2153 | 0.2659 | 0.217  |
| 0.2051 | 0.2467 | 0.2446 | 0.2668 | 0.263  | 0.2695 | 0.2601 | 0.286  | 0.2719 |
| 0.1612 | 0.166  | 0.1651 | 0.1571 | 0.1524 | 0.1514 | 0.1466 | 0.1578 | 0.139  |
| 0.1316 | 0.1319 | 0.126  | 0.1199 | 0.11   | 0.1135 | 0.1204 | 0.133  | 0.1189 |
| 0.1898 | 0.2058 | 0.1993 | 0.2378 | 0.2182 | 0.217  | 0.1991 | 0.2311 | 0.1946 |
| 0.2405 | 0.2565 | 0.2382 | 0.2582 | 0.2185 | 0.233  | 0.2293 | 0.2819 | 0.2815 |
| 0.1405 | 0.1405 | 0.1423 | 0.1417 | 0.1406 | 0.1383 | 0.1418 | 0.157  | 0.1268 |
| 0.1637 | 0.1712 | 0.1834 | 0.1819 | 0.1762 | 0.174  | 0.1746 | 0.1869 | 0.1498 |
| 0.2039 | 0.213  | 0.2149 | 0.2131 | 0.2058 | 0.2103 | 0.213  | 0.2425 | 0.1944 |
| 0.1333 | 0.1385 | 0.1336 | 0.1266 | 0.1314 | 0.1396 | 0.1411 | 0.1587 | 0.1276 |
| 0.0522 | 0.0554 | 0.0559 | 0.0612 | 0.0592 | 0.0558 | 0.0603 | 0.0719 | 0.0572 |
| 0.1041 | 0.1233 | 0.1074 | 0.0981 | 0.0866 | 0.1137 | 0.1297 | 0.1533 | 0.1541 |
| 0.1091 | 0.1374 | 0.1469 | 0.1514 | 0.1286 | 0.1599 | 0.142  | 0.1506 | 0.1592 |
| 0.0258 | 0.03   | 0.0284 | 0.0246 | 0.0181 | 0.0206 | 0.0241 | 0.0327 | 0.0284 |
| 0.0045 | 0.0044 | 0.0044 | 0.0046 | 0.0034 | 0.0038 | 0.0044 | 0.006  | 0.0058 |
| 0.0119 | 0.0116 | 0.0113 | 0.0105 | 0.01   | 0.0101 | 0.0102 | 0.0104 | 0.0101 |
| 0.0323 | 0.0304 | 0.0321 | 0.0305 | 0.0275 | 0.0254 | 0.026  | 0.0257 | 0.0258 |
| 0.029  | 0.0298 | 0.0291 | 0.0287 | 0.0293 | 0.0284 | 0.026  | 0.0264 | 0.0232 |
| 0.0112 | 0.0115 | 0.0115 | 0.0107 | 0.0117 | 0.0114 | 0.0118 | 0.0116 | 0.01   |
| 0.0017 | 0.0017 | 0.0018 | 0.0019 | 0.0018 | 0.0019 | 0.0019 | 0.002  | 0.0017 |
| 0      | 0      | 0      | 0      | 0      | 0      | 0      | 0      | 0      |
| 0      | 0      | 0      | 0      | 0      | 0      | 0      | 0      | 0      |
| 0      | 0      | 0      | 0      | 0      | 0      | 0      | 0      | 0      |
| 0      | 0      | 0      | 0      | 0      | 0      | 0      | 0      | 0      |
| 0      | 0      | 0      | 0      | 0      | 0      | 0      | 0      | 0      |
| 0      | 0      | 0      | 0      | 0      | 0      | 0      | 0      | 0      |
| 0      | 0      | 0      | 0      | 0      | 0      | 0      | 0      | 0      |
| 0      | 0      | 0      | 0      | 0      | 0      | 0      | 0      | 0      |
| 0      | 0      | 0      | 0      | 0      | 0      | 0      | 0      | 0      |
| 0      | 0      | 0      | 0      | 0      | 0      | 0      | 0      | 0      |
| 0      | 0      | 0      | 0      | 0      | 0      | 0      | 0      | 0      |
| 0      | 0      | 0      | 0      | 0      | 0      | 0      | 0      | 0      |
| 0      | 0      | 0      | 0      | 0      | 0      | 0      | 0      | 0      |
| 0      | 0      | 0      | 0      | 0      | 0      | 0      | 0      | 0      |
| 0.0028 | 0.0026 | 0.0025 | 0.0024 | 0.0022 | 0.0023 | 0.0024 | 0.0027 | 0.0023 |
| 0.0041 | 0.0043 | 0.0043 | 0.0041 | 0.0037 | 0.0039 | 0.0041 | 0.0045 | 0.0039 |
| 0.0042 | 0.0045 | 0.0045 | 0.0045 | 0.0043 | 0.004  | 0.0039 | 0.0045 | 0.004  |
| 0.0041 | 0.0045 | 0.0049 | 0.0048 | 0.0047 | 0.0049 | 0.0052 | 0.0062 | 0.005  |
| 0.0046 | 0.0047 | 0.0051 | 0.0056 | 0.0057 | 0.0054 | 0.006  | 0.0072 | 0.0057 |
| 0.0049 | 0.0052 | 0.0053 | 0.0049 | 0.005  | 0.0053 | 0.0059 | 0.0071 | 0.0055 |
| 0.0152 | 0.0156 | 0.0163 | 0.0178 | 0.0184 | 0.0192 | 0.0213 | 0.0249 | 0.0202 |
| 0.111  | 0.1131 | 0.1191 | 0.1219 | 0.1165 | 0.119  | 0.1142 | 0.1394 | 0.113  |

|        |        |        |        |        |        |        |        |        |
|--------|--------|--------|--------|--------|--------|--------|--------|--------|
| 0.1119 | 0.1145 | 0.1072 | 0.106  | 0.104  | 0.1079 | 0.1162 | 0.1373 | 0.1159 |
| 0.1366 | 0.1519 | 0.1672 | 0.1527 | 0.1592 | 0.1717 | 0.183  | 0.221  | 0.1727 |
| 0.1727 | 0.1878 | 0.197  | 0.2041 | 0.1951 | 0.211  | 0.2106 | 0.2361 | 0.1787 |
| 0.1329 | 0.1351 | 0.1343 | 0.1389 | 0.1346 | 0.1519 | 0.1539 | 0.1751 | 0.1439 |
| 0.1398 | 0.1437 | 0.1474 | 0.1433 | 0.1466 | 0.1644 | 0.1597 | 0.1959 | 0.1648 |
| 0.1211 | 0.1238 | 0.1248 | 0.1246 | 0.1202 | 0.1365 | 0.1379 | 0.1483 | 0.1247 |
| 0.1239 | 0.1222 | 0.1195 | 0.1138 | 0.1123 | 0.1124 | 0.1223 | 0.1446 | 0.1126 |
| 0.1472 | 0.1393 | 0.1461 | 0.1383 | 0.1368 | 0.1374 | 0.1402 | 0.1545 | 0.1365 |
| 0.1768 | 0.166  | 0.1617 | 0.1541 | 0.1488 | 0.1532 | 0.1543 | 0.1718 | 0.149  |
| 0.1381 | 0.1443 | 0.1376 | 0.1372 | 0.1276 | 0.1325 | 0.1419 | 0.1575 | 0.1257 |
| 0.1081 | 0.1214 | 0.1265 | 0.1265 | 0.1201 | 0.1183 | 0.1161 | 0.1356 | 0.1085 |
| 0.1402 | 0.141  | 0.1333 | 0.125  | 0.1172 | 0.1183 | 0.1236 | 0.1402 | 0.1177 |
| 0.1286 | 0.124  | 0.129  | 0.1256 | 0.1233 | 0.126  | 0.1244 | 0.1346 | 0.1292 |
| 0.197  | 0.2023 | 0.2045 | 0.2049 | 0.194  | 0.1976 | 0.1991 | 0.2308 | 0.2028 |
| 0.1658 | 0.1761 | 0.1961 | 0.1884 | 0.1848 | 0.1787 | 0.1871 | 0.2242 | 0.1754 |
| 0.114  | 0.1162 | 0.1179 | 0.1115 | 0.1046 | 0.1076 | 0.1044 | 0.1288 | 0.0868 |
| 0.1951 | 0.2047 | 0.2145 | 0.2252 | 0.213  | 0.2303 | 0.2363 | 0.286  | 0.2314 |
| 0.1841 | 0.1968 | 0.1928 | 0.1915 | 0.1796 | 0.1876 | 0.1912 | 0.2178 | 0.1659 |
| 0.063  | 0.0663 | 0.0686 | 0.0672 | 0.0669 | 0.0704 | 0.0756 | 0.0899 | 0.069  |
| 0.1224 | 0.1225 | 0.1239 | 0.1273 | 0.1354 | 0.1483 | 0.1513 | 0.168  | 0.1355 |
| 0.1276 | 0.1284 | 0.1286 | 0.1282 | 0.1241 | 0.1416 | 0.1433 | 0.1599 | 0.1254 |
| 0.1828 | 0.2009 | 0.2038 | 0.2175 | 0.1977 | 0.2021 | 0.1896 | 0.2431 | 0.211  |
| 0.0685 | 0.0745 | 0.0674 | 0.0768 | 0.0708 | 0.0715 | 0.0745 | 0.0878 | 0.0785 |
| 0.0233 | 0.0248 | 0.0228 | 0.0233 | 0.0228 | 0.0222 | 0.0216 | 0.0231 | 0.0214 |
| 0      | 0      | 0      | 0      | 0      | 0      | 0      | 0      | 0      |
| 0.0065 | 0.0062 | 0.0068 | 0.0066 | 0.0063 | 0.0061 | 0.0065 | 0.0065 | 0.0064 |
| 0.0048 | 0.005  | 0.0047 | 0.0042 | 0.004  | 0.0043 | 0.0046 | 0.0046 | 0.0041 |
| 0.0007 | 0.0008 | 0.0008 | 0.0008 | 0.0009 | 0.0009 | 0.001  | 0.0013 | 0.0009 |
| 0.0035 | 0.0037 | 0.0032 | 0.0033 | 0.0028 | 0.0028 | 0.0028 | 0.0047 | 0.0045 |
| 0.0069 | 0.0078 | 0.0061 | 0.0057 | 0.0057 | 0.0066 | 0.0075 | 0.0073 | 0.0049 |
| 0      | 0      | 0      | 0      | 0      | 0      | 0      | 0      | 0      |
| 0      | 0      | 0      | 0      | 0      | 0      | 0      | 0      | 0      |
| 0      | 0      | 0      | 0      | 0      | 0      | 0      | 0      | 0      |
| 0      | 0      | 0      | 0      | 0      | 0      | 0      | 0      | 0      |
| 0      | 0      | 0      | 0      | 0      | 0      | 0      | 0      | 0      |
| 0      | 0      | 0      | 0      | 0      | 0      | 0      | 0      | 0      |
| 0      | 0      | 0      | 0      | 0      | 0      | 0      | 0      | 0      |
| 0      | 0      | 0      | 0      | 0      | 0      | 0      | 0      | 0      |
| 0      | 0      | 0      | 0      | 0      | 0      | 0      | 0      | 0      |
| 0      | 0      | 0      | 0      | 0      | 0      | 0      | 0      | 0      |
| 0      | 0      | 0      | 0      | 0      | 0      | 0      | 0      | 0      |
| 0      | 0      | 0      | 0      | 0      | 0      | 0      | 0      | 0      |
| 0      | 0      | 0      | 0      | 0      | 0      | 0      | 0      | 0      |
| 0.0008 | 0.0008 | 0.0007 | 0.0007 | 0.0006 | 0.0006 | 0.0006 | 0.0006 | 0.0006 |





|        |        |        |        |        |        |        |        |        |   |
|--------|--------|--------|--------|--------|--------|--------|--------|--------|---|
| 0      | 0      | 0      | 0      | 0      | 0      | 0      | 0      | 0      | 0 |
| 0      | 0      | 0      | 0      | 0      | 0      | 0      | 0      | 0      | 0 |
| 0      | 0      | 0      | 0      | 0      | 0      | 0      | 0      | 0      | 0 |
| 0      | 0      | 0      | 0      | 0      | 0      | 0      | 0      | 0      | 0 |
| 0      | 0      | 0      | 0      | 0      | 0      | 0      | 0      | 0      | 0 |
| 0      | 0      | 0      | 0      | 0      | 0      | 0      | 0      | 0      | 0 |
| 0      | 0      | 0      | 0      | 0      | 0      | 0      | 0      | 0      | 0 |
| 0      | 0      | 0      | 0      | 0      | 0      | 0      | 0      | 0      | 0 |
| 0.0032 | 0.0036 | 0.0035 | 0.0034 | 0.0036 | 0.004  | 0.004  | 0.0048 | 0.0039 |   |
| 0.0029 | 0.0029 | 0.0029 | 0.0028 | 0.0029 | 0.003  | 0.003  | 0.0034 | 0.0027 |   |
| 0.0024 | 0.0026 | 0.0026 | 0.0025 | 0.0025 | 0.0028 | 0.0028 | 0.0032 | 0.0025 |   |
| 0.0014 | 0.0014 | 0.0016 | 0.0015 | 0.0014 | 0.0015 | 0.0015 | 0.0018 | 0.0015 |   |
| 0      | 0      | 0      | 0      | 0      | 0      | 0      | 0      | 0      |   |
| 0      | 0      | 0      | 0      | 0      | 0      | 0      | 0      | 0      |   |
| 0.0009 | 0.0008 | 0.0008 | 0.0008 | 0.0008 | 0.0007 | 0.0007 | 0.0006 | 0.0006 |   |
| 0.0008 | 0.0008 | 0.0008 | 0.0007 | 0.0006 | 0.0006 | 0.0006 | 0.0007 | 0.0006 |   |
| 0.005  | 0.0051 | 0.0052 | 0.0054 | 0.0052 | 0.0052 | 0.0049 | 0.0053 | 0.0051 |   |
| 0.0481 | 0.0505 | 0.0497 | 0.0516 | 0.0477 | 0.0519 | 0.0538 | 0.0615 | 0.0539 |   |
| 0.0886 | 0.0962 | 0.0924 | 0.0892 | 0.0802 | 0.0807 | 0.0843 | 0.1016 | 0.0843 |   |
| 0.0642 | 0.0598 | 0.0588 | 0.0602 | 0.0533 | 0.0523 | 0.0517 | 0.0589 | 0.0561 |   |
| 0.0785 | 0.079  | 0.075  | 0.0761 | 0.0669 | 0.0691 | 0.066  | 0.0747 | 0.0672 |   |
| 0.0814 | 0.1025 | 0.0946 | 0.0935 | 0.0879 | 0.1011 | 0.1132 | 0.1418 | 0.1225 |   |
| 0.1676 | 0.1836 | 0.1765 | 0.1731 | 0.1315 | 0.1478 | 0.1651 | 0.1926 | 0.1845 |   |
| 0.2463 | 0.2949 | 0.2829 | 0.2892 | 0.284  | 0.2678 | 0.2629 | 0.3478 | 0.3131 |   |
| 0.1294 | 0.1459 | 0.136  | 0.1472 | 0.1198 | 0.137  | 0.1229 | 0.1672 | 0.1461 |   |
| 0.0058 | 0.0059 | 0.0058 | 0.0049 | 0.0048 | 0.0047 | 0.0047 | 0.0044 | 0.0042 |   |
| 0.0377 | 0.0438 | 0.0386 | 0.0465 | 0.0427 | 0.0465 | 0.0551 | 0.0608 | 0.0545 |   |
| 0.1299 | 0.1405 | 0.1461 | 0.1578 | 0.1465 | 0.1699 | 0.1694 | 0.1988 | 0.1746 |   |
| 0.0974 | 0.1023 | 0.1016 | 0.1057 | 0.0985 | 0.1131 | 0.116  | 0.1494 | 0.1239 |   |
| 0.1339 | 0.1292 | 0.1217 | 0.1267 | 0.0992 | 0.1091 | 0.1181 | 0.1378 | 0.1381 |   |
| 0.1313 | 0.1338 | 0.1218 | 0.1382 | 0.1146 | 0.1091 | 0.1166 | 0.1283 | 0.1204 |   |
| 0.1459 | 0.1638 | 0.1533 | 0.1463 | 0.13   | 0.1331 | 0.1229 | 0.1483 | 0.124  |   |
| 0.1835 | 0.1883 | 0.1738 | 0.1833 | 0.1606 | 0.179  | 0.1692 | 0.2194 | 0.1947 |   |
| 0.1404 | 0.1479 | 0.1542 | 0.161  | 0.1556 | 0.1663 | 0.1723 | 0.2101 | 0.1739 |   |
| 0.113  | 0.1165 | 0.1075 | 0.1122 | 0.1039 | 0.1045 | 0.1145 | 0.1346 | 0.1179 |   |
| 0.2085 | 0.2432 | 0.2184 | 0.2269 | 0.209  | 0.246  | 0.242  | 0.2749 | 0.2525 |   |
| 0.1731 | 0.1817 | 0.1773 | 0.1887 | 0.1811 | 0.1931 | 0.1935 | 0.2273 | 0.1935 |   |
| 0.2151 | 0.2166 | 0.2111 | 0.236  | 0.2108 | 0.2485 | 0.2279 | 0.2691 | 0.2637 |   |
| 0.091  | 0.1128 | 0.0976 | 0.0975 | 0.1073 | 0.0825 | 0.0751 | 0.0793 | 0.0666 |   |
| 0.2238 | 0.2121 | 0.1935 | 0.2052 | 0.1803 | 0.2058 | 0.1895 | 0.2452 | 0.2307 |   |
| 0.017  | 0.0173 | 0.0164 | 0.0154 | 0.0155 | 0.016  | 0.0173 | 0.0198 | 0.0164 |   |
| 0.0057 | 0.0063 | 0.0066 | 0.0061 | 0.0057 | 0.0058 | 0.006  | 0.007  | 0.0056 |   |
| 0.001  | 0.001  | 0.0009 | 0.0009 | 0.0009 | 0.001  | 0.001  | 0.0011 | 0.0008 |   |
| 0.0068 | 0.0069 | 0.0064 | 0.0071 | 0.005  | 0.0048 | 0.0054 | 0.0062 | 0.0062 |   |

|        |        |        |        |        |        |        |        |        |
|--------|--------|--------|--------|--------|--------|--------|--------|--------|
| 0.0043 | 0.0042 | 0.0047 | 0.0045 | 0.0044 | 0.004  | 0.0039 | 0.0048 | 0.0039 |
| 0.0016 | 0.002  | 0.0012 | 0.0012 | 0.0013 | 0.0021 | 0.0024 | 0.0032 | 0.0028 |
| 0.002  | 0.0022 | 0.002  | 0.0025 | 0.0022 | 0.0025 | 0.0021 | 0.003  | 0.0028 |
| 0.0007 | 0.0008 | 0.0009 | 0.001  | 0.0009 | 0.0011 | 0.001  | 0.0013 | 0.001  |
| 0      | 0      | 0      | 0      | 0      | 0      | 0      | 0      | 0      |
| 0      | 0      | 0      | 0      | 0      | 0      | 0      | 0      | 0      |
| 0      | 0      | 0      | 0      | 0      | 0      | 0      | 0      | 0      |
| 0      | 0      | 0      | 0      | 0      | 0      | 0      | 0      | 0      |
| 0      | 0      | 0      | 0      | 0      | 0      | 0      | 0      | 0      |
| 0      | 0      | 0      | 0      | 0      | 0      | 0      | 0      | 0      |
| 0      | 0      | 0      | 0      | 0      | 0      | 0      | 0      | 0      |
| 0      | 0      | 0      | 0      | 0      | 0      | 0      | 0      | 0      |
| 0      | 0      | 0      | 0      | 0      | 0      | 0      | 0      | 0      |
| 0      | 0      | 0      | 0      | 0      | 0      | 0      | 0      | 0      |
| 0.0064 | 0.0066 | 0.0064 | 0.0062 | 0.0058 | 0.0059 | 0.0063 | 0.007  | 0.0058 |
| 0.0047 | 0.0054 | 0.0054 | 0.0052 | 0.005  | 0.0047 | 0.0046 | 0.0053 | 0.0046 |
| 0.0033 | 0.0036 | 0.0037 | 0.0036 | 0.0034 | 0.0036 | 0.0036 | 0.0041 | 0.0036 |
| 0.002  | 0.0019 | 0.0019 | 0.002  | 0.0021 | 0.0021 | 0.0023 | 0.0029 | 0.0023 |
| 0.0011 | 0.0012 | 0.0011 | 0.0011 | 0.0011 | 0.0013 | 0.0013 | 0.0015 | 0.0011 |
| 0.0014 | 0.0015 | 0.0015 | 0.0015 | 0.0015 | 0.0015 | 0.0015 | 0.0018 | 0.0015 |
| 0.0007 | 0.0007 | 0.0007 | 0.0007 | 0.0007 | 0.0007 | 0.0008 | 0.0008 | 0.0007 |
| 0.0015 | 0.0015 | 0.0013 | 0.001  | 0.001  | 0.001  | 0.0011 | 0.0011 | 0.0011 |
| 0.0118 | 0.0125 | 0.0121 | 0.0128 | 0.0126 | 0.0129 | 0.0133 | 0.0146 | 0.0121 |
| 0      | 0      | 0      | 0      | 0      | 0      | 0      | 0      | 0      |
| 0.0497 | 0.0514 | 0.0519 | 0.0529 | 0.0494 | 0.045  | 0.0427 | 0.0443 | 0.0417 |
| 0.0826 | 0.0873 | 0.0887 | 0.0883 | 0.0837 | 0.0861 | 0.0876 | 0.0986 | 0.0859 |
| 0.0447 | 0.0485 | 0.0523 | 0.0549 | 0.0499 | 0.0575 | 0.0619 | 0.0752 | 0.0693 |
| 0.0809 | 0.0809 | 0.0794 | 0.0795 | 0.0744 | 0.0716 | 0.072  | 0.0748 | 0.0724 |
| 0.0708 | 0.0687 | 0.0676 | 0.0666 | 0.0585 | 0.0556 | 0.0613 | 0.0639 | 0.0652 |
| 0.0278 | 0.0338 | 0.0335 | 0.0388 | 0.0344 | 0.0367 | 0.0349 | 0.0421 | 0.042  |
| 0.0324 | 0.0368 | 0.037  | 0.0359 | 0.0307 | 0.0319 | 0.029  | 0.0325 | 0.0304 |
| 0.0008 | 0.001  | 0.001  | 0.001  | 0.0011 | 0.0012 | 0.0012 | 0.0014 | 0.0011 |
| 0.0183 | 0.0195 | 0.0195 | 0.0235 | 0.0228 | 0.0212 | 0.0218 | 0.023  | 0.0243 |
| 0.0158 | 0.0146 | 0.0155 | 0.0167 | 0.0171 | 0.0161 | 0.0161 | 0.0185 | 0.0155 |
| 0.0453 | 0.0441 | 0.0408 | 0.0453 | 0.0478 | 0.0508 | 0.0477 | 0.0592 | 0.0439 |
| 0.0548 | 0.06   | 0.0599 | 0.0692 | 0.0587 | 0.0588 | 0.0667 | 0.0792 | 0.0669 |
| 0.0202 | 0.0234 | 0.0238 | 0.0261 | 0.0233 | 0.0237 | 0.0247 | 0.0291 | 0.026  |
| 0.0569 | 0.0556 | 0.0578 | 0.062  | 0.0627 | 0.0633 | 0.0648 | 0.079  | 0.0577 |
| 0.0679 | 0.0717 | 0.0724 | 0.0715 | 0.0733 | 0.0753 | 0.0792 | 0.0963 | 0.0773 |
| 0.0418 | 0.0425 | 0.0431 | 0.0432 | 0.0419 | 0.0461 | 0.048  | 0.0581 | 0.0469 |
| 0.0431 | 0.049  | 0.0463 | 0.0468 | 0.0485 | 0.0553 | 0.0563 | 0.0711 | 0.0528 |
| 0.1065 | 0.1154 | 0.1197 | 0.1222 | 0.1094 | 0.1168 | 0.1205 | 0.149  | 0.1339 |
| 0.0726 | 0.0819 | 0.0845 | 0.0828 | 0.0883 | 0.0952 | 0.0903 | 0.11   | 0.0914 |
| 0.0479 | 0.0463 | 0.0548 | 0.0595 | 0.0542 | 0.073  | 0.0656 | 0.0817 | 0.07   |

|        |        |        |        |        |        |        |        |        |
|--------|--------|--------|--------|--------|--------|--------|--------|--------|
| 0.0225 | 0.0216 | 0.0208 | 0.0204 | 0.0193 | 0.0194 | 0.019  | 0.0184 | 0.0166 |
| 0.0178 | 0.0164 | 0.0166 | 0.0201 | 0.0166 | 0.0194 | 0.019  | 0.0207 | 0.0203 |
| 0.0275 | 0.0295 | 0.029  | 0.0295 | 0.0284 | 0.0301 | 0.0288 | 0.0322 | 0.0288 |
| 0.007  | 0.0074 | 0.0071 | 0.0075 | 0.0069 | 0.0071 | 0.0073 | 0.0089 | 0.0079 |
| 0      | 0      | 0      | 0      | 0      | 0      | 0      | 0      | 0      |
| 0      | 0      | 0      | 0      | 0      | 0      | 0      | 0      | 0      |
| 0      | 0      | 0      | 0      | 0      | 0      | 0      | 0      | 0      |
| 0.0008 | 0.0008 | 0.0008 | 0.0009 | 0.001  | 0.001  | 0.0011 | 0.0013 | 0.0011 |
| 0.0078 | 0.0076 | 0.0077 | 0.0082 | 0.0073 | 0.0077 | 0.0068 | 0.008  | 0.0075 |
| 0      | 0      | 0      | 0      | 0      | 0      | 0      | 0      | 0      |
| 0      | 0      | 0      | 0      | 0      | 0      | 0      | 0      | 0      |
| 0      | 0      | 0      | 0      | 0      | 0      | 0      | 0      | 0      |
| 0      | 0      | 0      | 0      | 0      | 0      | 0      | 0      | 0      |
| 0      | 0      | 0      | 0      | 0      | 0      | 0      | 0      | 0      |
| 0      | 0      | 0      | 0      | 0      | 0      | 0      | 0      | 0      |
| 0      | 0      | 0      | 0      | 0      | 0      | 0      | 0      | 0      |
| 0      | 0      | 0      | 0      | 0      | 0      | 0      | 0      | 0      |
| 0      | 0      | 0      | 0      | 0      | 0      | 0      | 0      | 0      |
| 0      | 0      | 0      | 0      | 0      | 0      | 0      | 0      | 0      |
| 0      | 0      | 0      | 0      | 0      | 0      | 0      | 0      | 0      |
| 0.0034 | 0.0035 | 0.0035 | 0.0034 | 0.0031 | 0.0029 | 0.003  | 0.0031 | 0.0024 |
| 0.0027 | 0.0026 | 0.0025 | 0.0025 | 0.0024 | 0.0023 | 0.0024 | 0.0026 | 0.0022 |
| 0.0015 | 0.0017 | 0.0017 | 0.0016 | 0.0015 | 0.0015 | 0.0015 | 0.0018 | 0.0013 |
| 0.0008 | 0.0008 | 0.0009 | 0.0009 | 0.0009 | 0.0009 | 0.0009 | 0.0013 | 0.0008 |
| 0.0009 | 0.001  | 0.001  | 0.0011 | 0.0011 | 0.001  | 0.0011 | 0.0015 | 0.0012 |
| 0      | 0      | 0      | 0      | 0      | 0      | 0      | 0      | 0      |
| 0      | 0      | 0      | 0      | 0      | 0      | 0      | 0      | 0      |
| 0.0007 | 0.0006 | 0.0006 | 0.0005 | 0.0005 | 0.0005 | 0.0005 | 0.0004 | 0.0005 |
| 0      | 0      | 0      | 0      | 0      | 0      | 0      | 0      | 0      |
| 0.0067 | 0.007  | 0.0075 | 0.007  | 0.0076 | 0.0076 | 0.0085 | 0.0098 | 0.0075 |
| 0.0248 | 0.0269 | 0.026  | 0.0265 | 0.0255 | 0.0273 | 0.0294 | 0.0326 | 0.0295 |
| 0.0181 | 0.0225 | 0.019  | 0.0221 | 0.0177 | 0.0257 | 0.0255 | 0.0309 | 0.0258 |
| 0.0008 | 0.0009 | 0.001  | 0.001  | 0.0009 | 0.001  | 0.0011 | 0.0013 | 0.0009 |
| 0.0241 | 0.0226 | 0.0231 | 0.0227 | 0.0229 | 0.0224 | 0.0224 | 0.0236 | 0.0212 |
| 0.0069 | 0.0071 | 0.0071 | 0.0066 | 0.0066 | 0.0065 | 0.0062 | 0.0066 | 0.0056 |
| 0.0099 | 0.0115 | 0.0104 | 0.0109 | 0.0087 | 0.0084 | 0.009  | 0.0099 | 0.0096 |
| 0.0076 | 0.0079 | 0.0088 | 0.0088 | 0.0084 | 0.009  | 0.0082 | 0.0092 | 0.01   |
| 0.0288 | 0.0297 | 0.0288 | 0.0299 | 0.0291 | 0.0308 | 0.0318 | 0.0366 | 0.0311 |
| 0.0194 | 0.0201 | 0.0203 | 0.0209 | 0.0196 | 0.0205 | 0.0213 | 0.0248 | 0.0217 |
| 0.0023 | 0.0024 | 0.0023 | 0.0029 | 0.0024 | 0.0027 | 0.0026 | 0.0028 | 0.0026 |
| 0.0134 | 0.0131 | 0.0129 | 0.0149 | 0.0133 | 0.0141 | 0.0123 | 0.0138 | 0.0138 |
| 0.0174 | 0.0171 | 0.0185 | 0.0192 | 0.0184 | 0.0187 | 0.0194 | 0.0213 | 0.0181 |
| 0.005  | 0.0049 | 0.0048 | 0.0048 | 0.0044 | 0.0044 | 0.0051 | 0.0045 | 0.0051 |
| 0.003  | 0.0036 | 0.0039 | 0.004  | 0.0038 | 0.0047 | 0.0054 | 0.0061 | 0.006  |







































|        |        |        |        |        |        |        |        |        |
|--------|--------|--------|--------|--------|--------|--------|--------|--------|
| 0      | 0      | 0      | 0      | 0      | 0      | 0      | 0      | 0      |
| 0      | 0      | 0      | 0      | 0      | 0      | 0      | 0      | 0      |
| 0      | 0      | 0      | 0      | 0      | 0      | 0      | 0      | 0      |
| 0      | 0      | 0      | 0      | 0      | 0      | 0      | 0      | 0      |
| 0      | 0      | 0      | 0      | 0      | 0      | 0      | 0      | 0      |
| 0      | 0      | 0      | 0      | 0      | 0      | 0      | 0      | 0      |
| 0      | 0      | 0      | 0      | 0      | 0      | 0      | 0      | 0      |
| 0      | 0      | 0      | 0      | 0      | 0      | 0      | 0      | 0      |
| 0      | 0      | 0      | 0      | 0      | 0      | 0      | 0      | 0      |
| 0      | 0      | 0      | 0      | 0      | 0      | 0      | 0      | 0      |
| 0      | 0      | 0      | 0      | 0      | 0      | 0      | 0      | 0      |
| 0      | 0      | 0      | 0      | 0      | 0      | 0      | 0      | 0      |
| 0      | 0      | 0      | 0      | 0      | 0      | 0      | 0      | 0      |
| 0      | 0      | 0      | 0      | 0      | 0      | 0      | 0      | 0      |
| 0      | 0      | 0      | 0      | 0      | 0      | 0      | 0      | 0      |
| 0      | 0      | 0      | 0      | 0      | 0      | 0      | 0      | 0      |
| 0      | 0      | 0      | 0      | 0      | 0      | 0      | 0      | 0      |
| 0      | 0      | 0      | 0      | 0      | 0      | 0      | 0      | 0      |
| 0      | 0      | 0      | 0      | 0      | 0      | 0      | 0      | 0      |
| 0      | 0      | 0      | 0      | 0      | 0      | 0      | 0      | 0      |
| 0      | 0      | 0      | 0      | 0      | 0      | 0      | 0      | 0      |
| 0      | 0      | 0      | 0      | 0      | 0      | 0      | 0      | 0      |
| 0      | 0      | 0      | 0      | 0      | 0      | 0      | 0      | 0      |
| 0      | 0      | 0      | 0      | 0      | 0      | 0      | 0      | 0      |
| 0      | 0      | 0      | 0      | 0      | 0      | 0      | 0      | 0      |
| 0      | 0      | 0      | 0      | 0      | 0      | 0      | 0      | 0      |
| 0      | 0      | 0      | 0      | 0      | 0      | 0      | 0      | 0      |
| 0      | 0      | 0      | 0      | 0      | 0      | 0      | 0      | 0      |
| 0      | 0      | 0      | 0      | 0      | 0      | 0      | 0      | 0      |
| 0      | 0      | 0      | 0      | 0      | 0      | 0      | 0      | 0      |
| 0      | 0      | 0      | 0      | 0      | 0      | 0      | 0      | 0      |
| 0      | 0      | 0      | 0      | 0      | 0      | 0      | 0      | 0      |
| 0      | 0      | 0      | 0      | 0      | 0      | 0      | 0      | 0      |
| 0      | 0      | 0      | 0      | 0      | 0      | 0      | 0      | 0      |
| 0      | 0      | 0      | 0      | 0      | 0      | 0      | 0      | 0      |
| 0      | 0      | 0      | 0      | 0      | 0      | 0      | 0      | 0      |
| 0      | 0      | 0      | 0      | 0      | 0      | 0      | 0      | 0      |
| 0      | 0      | 0      | 0      | 0      | 0      | 0      | 0      | 0      |
| 0      | 0      | 0      | 0      | 0      | 0      | 0      | 0      | 0      |
| 0      | 0      | 0      | 0      | 0      | 0      | 0      | 0      | 0      |
| 0.009  | 0.0113 | 0.0074 | 0.0085 | 0.0059 | 0.0076 | 0.0074 | 0.0057 | 0.0051 |
| 0.0094 | 0.0129 | 0.0092 | 0.01   | 0.0061 | 0.0081 | 0.0082 | 0.0074 | 0.0062 |
| 0.0093 | 0.0121 | 0.0092 | 0.0093 | 0.0064 | 0.0082 | 0.0082 | 0.0073 | 0.0072 |
| 0.0076 | 0.0102 | 0.0072 | 0.0077 | 0.0047 | 0.0058 | 0.0069 | 0.0062 | 0.0042 |
| 0.0075 | 0.0104 | 0.007  | 0.0087 | 0.0062 | 0.0075 | 0.007  | 0.0054 | 0.0053 |
| 0.0089 | 0.0123 | 0.0086 | 0.0101 | 0.0066 | 0.0091 | 0.0098 | 0.0077 | 0.0064 |











|        |        |        |        |        |        |        |        |        |
|--------|--------|--------|--------|--------|--------|--------|--------|--------|
| 0      | 0      | 0      | 0      | 0      | 0      | 0      | 0      | 0      |
| 0      | 0      | 0      | 0      | 0      | 0      | 0      | 0      | 0      |
| 0      | 0      | 0      | 0      | 0      | 0      | 0      | 0      | 0      |
| 0      | 0      | 0      | 0      | 0      | 0      | 0      | 0      | 0      |
| 0      | 0      | 0      | 0      | 0      | 0      | 0      | 0      | 0      |
| 0      | 0      | 0      | 0      | 0      | 0      | 0      | 0      | 0      |
| 0      | 0      | 0      | 0      | 0      | 0      | 0      | 0      | 0      |
| 0      | 0      | 0      | 0      | 0      | 0      | 0      | 0      | 0      |
| 0      | 0      | 0      | 0      | 0      | 0      | 0      | 0      | 0      |
| 0      | 0      | 0      | 0      | 0      | 0      | 0      | 0      | 0      |
| 0      | 0      | 0      | 0      | 0      | 0      | 0      | 0      | 0      |
| 0      | 0      | 0      | 0      | 0      | 0      | 0      | 0      | 0      |
| 0      | 0      | 0      | 0      | 0      | 0      | 0      | 0      | 0      |
| 0      | 0      | 0      | 0      | 0      | 0      | 0      | 0      | 0      |
| 0      | 0      | 0      | 0      | 0      | 0      | 0      | 0      | 0      |
| 0      | 0      | 0      | 0      | 0      | 0      | 0      | 0      | 0      |
| 0      | 0      | 0      | 0      | 0      | 0      | 0      | 0      | 0      |
| 0      | 0      | 0      | 0      | 0      | 0      | 0      | 0      | 0      |
| 0      | 0      | 0      | 0      | 0      | 0      | 0      | 0      | 0      |
| 0.0002 | 0.0012 | 0.0012 | 0.0013 | 0.0011 | 0.0012 | 0.0009 | 0.001  | 0.0008 |
| 0.0004 | 0.0006 | 0.0005 | 0.0006 | 0.0005 | 0.0005 | 0.0005 | 0.0006 | 0.0006 |
| 0      | 0      | 0      | 0      | 0      | 0      | 0      | 0      | 0      |
| 0      | 0      | 0      | 0      | 0      | 0      | 0      | 0      | 0      |
| 0.0018 | 0.0036 | 0.0031 | 0.0035 | 0.003  | 0.0035 | 0.0042 | 0.0049 | 0.0046 |
| 0.004  | 0.0096 | 0.009  | 0.0115 | 0.0092 | 0.0101 | 0.0109 | 0.0121 | 0.0121 |
| 0.1679 | 0.2329 | 0.1508 | 0.1926 | 0.1065 | 0.1498 | 0.1694 | 0.1523 | 0.1202 |
| 0.3774 | 0.5297 | 0.3366 | 0.3724 | 0.2668 | 0.2917 | 0.2737 | 0.2815 | 0.2626 |
| 0.2271 | 0.3006 | 0.2198 | 0.2389 | 0.1743 | 0.1999 | 0.1934 | 0.1733 | 0.1578 |
| 0.0573 | 0.0869 | 0.0676 | 0.0839 | 0.06   | 0.071  | 0.0789 | 0.0821 | 0.0779 |
| 0.1681 | 0.2438 | 0.1752 | 0.2041 | 0.1358 | 0.1676 | 0.1847 | 0.1637 | 0.1457 |
| 0.0674 | 0.1173 | 0.0958 | 0.0986 | 0.0753 | 0.0915 | 0.0821 | 0.0724 | 0.0614 |
| 0.0226 | 0.1229 | 0.1133 | 0.1031 | 0.0811 | 0.1046 | 0.067  | 0.0593 | 0.0288 |
| 0.4176 | 0.5535 | 0.3652 | 0.441  | 0.2854 | 0.3995 | 0.3514 | 0.3348 | 0.2993 |
| 0.1077 | 0.1588 | 0.1054 | 0.1299 | 0.0772 | 0.1076 | 0.1062 | 0.0896 | 0.0721 |
| 0.0468 | 0.0779 | 0.0627 | 0.0731 | 0.0507 | 0.063  | 0.0543 | 0.0392 | 0.0331 |
| 0.0203 | 0.0447 | 0.0355 | 0.042  | 0.0278 | 0.0382 | 0.0323 | 0.0232 | 0.0162 |
| 0.1216 | 0.1851 | 0.1368 | 0.1659 | 0.1175 | 0.1485 | 0.1628 | 0.1513 | 0.1335 |
| 0.168  | 0.2418 | 0.1803 | 0.2051 | 0.1594 | 0.1862 | 0.1836 | 0.1793 | 0.1663 |
| 0.0165 | 0.0309 | 0.027  | 0.0294 | 0.0217 | 0.0268 | 0.0266 | 0.0257 | 0.0226 |
| 0.0044 | 0.017  | 0.0154 | 0.0147 | 0.0108 | 0.0124 | 0.0108 | 0.0134 | 0.0108 |
| 0.0916 | 0.1366 | 0.1    | 0.1173 | 0.0858 | 0.1057 | 0.1052 | 0.0986 | 0.0872 |
| 0.0021 | 0.0039 | 0.0031 | 0.004  | 0.0033 | 0.0034 | 0.004  | 0.0049 | 0.0048 |
| 0.0003 | 0.0005 | 0.0004 | 0.0005 | 0.0003 | 0.0004 | 0.0005 | 0.0006 | 0.0006 |
| 0      | 0      | 0      | 0      | 0      | 0      | 0      | 0      | 0      |
| 0.0005 | 0.0007 | 0.0007 | 0.0007 | 0.0006 | 0.0007 | 0.0007 | 0.0008 | 0.0007 |

|        |        |        |        |        |        |        |        |        |
|--------|--------|--------|--------|--------|--------|--------|--------|--------|
| 0      | 0      | 0      | 0      | 0      | 0      | 0      | 0      | 0      |
| 0      | 0      | 0      | 0      | 0      | 0      | 0      | 0      | 0      |
| 0.0003 | 0.0005 | 0.0004 | 0.0005 | 0.0004 | 0.0005 | 0.0005 | 0.0006 | 0.0007 |
| 0      | 0      | 0      | 0      | 0      | 0      | 0      | 0      | 0      |
| 0      | 0      | 0      | 0      | 0      | 0      | 0      | 0      | 0      |
| 0      | 0      | 0      | 0      | 0      | 0      | 0      | 0      | 0      |
| 0      | 0      | 0      | 0      | 0      | 0      | 0      | 0      | 0      |
| 0      | 0      | 0      | 0      | 0      | 0      | 0      | 0      | 0      |
| 0      | 0      | 0      | 0      | 0      | 0      | 0      | 0      | 0      |
| 0      | 0      | 0      | 0      | 0      | 0      | 0      | 0      | 0      |
| 0      | 0      | 0      | 0      | 0      | 0      | 0      | 0      | 0      |
| 0      | 0      | 0      | 0      | 0      | 0      | 0      | 0      | 0      |
| 0      | 0      | 0      | 0      | 0      | 0      | 0      | 0      | 0      |
| 0      | 0      | 0      | 0      | 0      | 0      | 0      | 0      | 0      |
| 0      | 0      | 0      | 0      | 0      | 0      | 0      | 0      | 0      |
| 0      | 0      | 0      | 0      | 0      | 0      | 0      | 0      | 0      |
| 0      | 0      | 0      | 0      | 0      | 0      | 0      | 0      | 0      |
| 0      | 0      | 0      | 0      | 0      | 0      | 0      | 0      | 0      |
| 0      | 0      | 0      | 0      | 0      | 0      | 0      | 0      | 0      |
| 0      | 0      | 0      | 0      | 0      | 0      | 0      | 0      | 0      |
| 0      | 0      | 0      | 0      | 0      | 0      | 0      | 0      | 0      |
| 0.0006 | 0.0017 | 0.0014 | 0.0015 | 0.0012 | 0.0014 | 0.0011 | 0.0014 | 0.0011 |
| 0      | 0      | 0      | 0      | 0      | 0      | 0      | 0      | 0      |
| 0      | 0      | 0      | 0      | 0      | 0      | 0      | 0      | 0      |
| 0.0003 | 0.0006 | 0.0005 | 0.0006 | 0.0005 | 0.0005 | 0.0006 | 0.0007 | 0.0007 |
| 0.0003 | 0.0006 | 0.0005 | 0.0006 | 0.0005 | 0.0005 | 0.0006 | 0.0007 | 0.0007 |
| 0      | 0      | 0      | 0      | 0      | 0      | 0      | 0      | 0      |
| 0.0007 | 0.0049 | 0.004  | 0.0045 | 0.0036 | 0.0045 | 0.0033 | 0.0036 | 0.0025 |
| 0.0009 | 0.0087 | 0.0088 | 0.0082 | 0.0057 | 0.0073 | 0.0061 | 0.0069 | 0.0051 |
| 0.0454 | 0.0846 | 0.0678 | 0.0728 | 0.0581 | 0.0703 | 0.0654 | 0.0609 | 0.0508 |
| 0.1389 | 0.1713 | 0.1319 | 0.1408 | 0.0864 | 0.1299 | 0.1361 | 0.1144 | 0.0931 |
| 0.0707 | 0.1101 | 0.0763 | 0.0894 | 0.0617 | 0.0837 | 0.0787 | 0.0718 | 0.0577 |
| 0.0137 | 0.0391 | 0.0314 | 0.0354 | 0.0278 | 0.0337 | 0.0282 | 0.0323 | 0.0298 |
| 0.0191 | 0.0477 | 0.0394 | 0.0464 | 0.0378 | 0.0484 | 0.0489 | 0.0526 | 0.0532 |
| 0.0268 | 0.072  | 0.0607 | 0.0666 | 0.0503 | 0.0575 | 0.0505 | 0.0602 | 0.0598 |
| 0.0404 | 0.1924 | 0.1776 | 0.1737 | 0.1422 | 0.1887 | 0.1564 | 0.1455 | 0.1113 |
| 0.1862 | 0.3521 | 0.2743 | 0.2789 | 0.1751 | 0.2391 | 0.2103 | 0.1499 | 0.114  |
| 0.119  | 0.2083 | 0.153  | 0.1635 | 0.1045 | 0.1373 | 0.1355 | 0.1168 | 0.0858 |
| 0.0487 | 0.1779 | 0.1529 | 0.1724 | 0.1305 | 0.1616 | 0.1288 | 0.1269 | 0.0817 |
| 0.105  | 0.2325 | 0.2163 | 0.2131 | 0.1642 | 0.203  | 0.1701 | 0.1565 | 0.1159 |
| 0.114  | 0.2133 | 0.1732 | 0.191  | 0.1329 | 0.1704 | 0.1528 | 0.1479 | 0.1234 |
| 0.1667 | 0.2308 | 0.1712 | 0.1981 | 0.1419 | 0.1833 | 0.1919 | 0.1808 | 0.17   |
| 0.1032 | 0.1549 | 0.1154 | 0.1403 | 0.1029 | 0.1288 | 0.1409 | 0.1361 | 0.1281 |



|        |        |        |        |        |        |        |        |        |
|--------|--------|--------|--------|--------|--------|--------|--------|--------|
| 0.0593 | 0.0867 | 0.0621 | 0.0656 | 0.0386 | 0.0486 | 0.0492 | 0.0355 | 0.0264 |
| 0.0774 | 0.1144 | 0.086  | 0.0895 | 0.0576 | 0.0776 | 0.0627 | 0.0524 | 0.0451 |
| 0.0025 | 0.0048 | 0.0046 | 0.0054 | 0.0044 | 0.0048 | 0.0056 | 0.0061 | 0.0057 |
| 0.0003 | 0.0005 | 0.0004 | 0.0005 | 0.0004 | 0.0005 | 0.0006 | 0.0006 | 0.0006 |
| 0      | 0      | 0      | 0      | 0      | 0      | 0      | 0      | 0      |
| 0.0004 | 0.0006 | 0.0006 | 0.0007 | 0.0006 | 0.0006 | 0.0007 | 0.0008 | 0.0008 |
| 0      | 0      | 0      | 0      | 0      | 0      | 0      | 0      | 0      |
| 0      | 0      | 0      | 0      | 0      | 0      | 0      | 0      | 0      |
| 0.0004 | 0.0006 | 0.0005 | 0.0006 | 0.0006 | 0.0006 | 0.0007 | 0.0007 | 0.0008 |
| 0      | 0      | 0      | 0      | 0      | 0      | 0      | 0      | 0      |
| 0      | 0      | 0      | 0      | 0      | 0      | 0      | 0      | 0      |
| 0      | 0      | 0      | 0      | 0      | 0      | 0      | 0      | 0      |
| 0      | 0      | 0      | 0      | 0      | 0      | 0      | 0      | 0      |
| 0      | 0      | 0      | 0      | 0      | 0      | 0      | 0      | 0      |
| 0      | 0      | 0      | 0      | 0      | 0      | 0      | 0      | 0      |
| 0      | 0      | 0      | 0      | 0      | 0      | 0      | 0      | 0      |
| 0      | 0      | 0      | 0      | 0      | 0      | 0      | 0      | 0      |
| 0      | 0      | 0      | 0      | 0      | 0      | 0      | 0      | 0      |
| 0      | 0      | 0      | 0      | 0      | 0      | 0      | 0      | 0      |
| 0      | 0      | 0      | 0      | 0      | 0      | 0      | 0      | 0      |
| 0      | 0      | 0      | 0      | 0      | 0      | 0      | 0      | 0      |
| 0      | 0      | 0      | 0      | 0      | 0      | 0      | 0      | 0      |
| 0      | 0      | 0      | 0      | 0      | 0      | 0      | 0      | 0      |
| 0      | 0      | 0      | 0      | 0      | 0      | 0      | 0      | 0      |
| 0      | 0      | 0      | 0      | 0      | 0      | 0      | 0      | 0      |
| 0      | 0      | 0      | 0      | 0      | 0      | 0      | 0      | 0      |
| 0      | 0      | 0      | 0      | 0      | 0      | 0      | 0      | 0      |
| 0      | 0      | 0      | 0      | 0      | 0      | 0      | 0      | 0      |
| 0.0012 | 0.0035 | 0.0031 | 0.0035 | 0.0028 | 0.0036 | 0.0033 | 0.0032 | 0.003  |
| 0.0002 | 0.001  | 0.0009 | 0.001  | 0.0007 | 0.001  | 0.0007 | 0.0007 | 0.0005 |
| 0      | 0      | 0      | 0      | 0      | 0      | 0      | 0      | 0      |
| 0.0004 | 0.0005 | 0.0004 | 0.0005 | 0.0004 | 0.0005 | 0.0006 | 0.0007 | 0.0007 |
| 0.001  | 0.0017 | 0.0014 | 0.0017 | 0.0013 | 0.0015 | 0.0018 | 0.002  | 0.002  |
| 0.0006 | 0.0022 | 0.002  | 0.002  | 0.0016 | 0.0018 | 0.0013 | 0.0017 | 0.0012 |
| 0.0015 | 0.0076 | 0.0072 | 0.0079 | 0.0062 | 0.0081 | 0.006  | 0.0058 | 0.0042 |
| 0.0019 | 0.0106 | 0.0105 | 0.0108 | 0.0099 | 0.0111 | 0.0094 | 0.0104 | 0.0087 |
| 0.0027 | 0.0787 | 0.0853 | 0.0891 | 0.077  | 0.0978 | 0.0742 | 0.0759 | 0.0602 |
| 0.0184 | 0.0486 | 0.0415 | 0.0403 | 0.0326 | 0.0413 | 0.0315 | 0.0312 | 0.0265 |
| 0.1217 | 0.1717 | 0.1246 | 0.1459 | 0.1026 | 0.132  | 0.1396 | 0.1323 | 0.1249 |
| 0.1574 | 0.2248 | 0.1761 | 0.1999 | 0.1492 | 0.182  | 0.1874 | 0.1874 | 0.1639 |
| 0.0307 | 0.1365 | 0.1245 | 0.1263 | 0.0987 | 0.1233 | 0.0806 | 0.0941 | 0.0774 |
| 0.0312 | 0.1677 | 0.1553 | 0.1581 | 0.1285 | 0.1766 | 0.1386 | 0.1505 | 0.1143 |
| 0.0282 | 0.16   | 0.132  | 0.1425 | 0.1084 | 0.1467 | 0.1131 | 0.113  | 0.0832 |
| 0.0497 | 0.1389 | 0.1137 | 0.1207 | 0.0883 | 0.1188 | 0.103  | 0.1037 | 0.0886 |

|        |        |        |        |        |        |        |        |        |
|--------|--------|--------|--------|--------|--------|--------|--------|--------|
| 0.0466 | 0.1634 | 0.1336 | 0.1399 | 0.09   | 0.1218 | 0.1138 | 0.1194 | 0.0968 |
| 0.1156 | 0.2522 | 0.2164 | 0.2451 | 0.1936 | 0.2406 | 0.1922 | 0.1881 | 0.1422 |
| 0.1049 | 0.2439 | 0.2206 | 0.2198 | 0.1498 | 0.1941 | 0.1626 | 0.1544 | 0.1367 |
| 0.0978 | 0.1678 | 0.141  | 0.1567 | 0.1223 | 0.1453 | 0.146  | 0.1376 | 0.1149 |
| 0.1054 | 0.1558 | 0.1344 | 0.1488 | 0.1208 | 0.138  | 0.15   | 0.1581 | 0.1512 |
| 0.0836 | 0.1542 | 0.1246 | 0.1504 | 0.1212 | 0.1412 | 0.1574 | 0.1578 | 0.1482 |
| 0.0999 | 0.1365 | 0.1051 | 0.1161 | 0.0863 | 0.1058 | 0.1018 | 0.0993 | 0.0853 |
| 0.0531 | 0.0639 | 0.0449 | 0.0497 | 0.0321 | 0.0406 | 0.0432 | 0.0381 | 0.0262 |
| 0.0045 | 0.0082 | 0.0071 | 0.008  | 0.0071 | 0.0078 | 0.009  | 0.0096 | 0.009  |
| 0.0005 | 0.0011 | 0.0008 | 0.0011 | 0.0008 | 0.0009 | 0.0011 | 0.0012 | 0.0013 |
| 0      | 0      | 0      | 0      | 0      | 0      | 0      | 0      | 0      |
| 0.0003 | 0.0006 | 0.0004 | 0.0006 | 0.0005 | 0.0005 | 0.0006 | 0.0007 | 0.0007 |
| 0      | 0      | 0      | 0      | 0      | 0      | 0      | 0      | 0      |
| 0      | 0      | 0      | 0      | 0      | 0      | 0      | 0      | 0      |
| 0.0003 | 0.0006 | 0.0004 | 0.0005 | 0.0005 | 0.0005 | 0.0005 | 0.0006 | 0.0006 |
| 0      | 0      | 0      | 0      | 0      | 0      | 0      | 0      | 0      |
| 0      | 0      | 0      | 0      | 0      | 0      | 0      | 0      | 0      |
| 0      | 0      | 0      | 0      | 0      | 0      | 0      | 0      | 0      |
| 0      | 0      | 0      | 0      | 0      | 0      | 0      | 0      | 0      |
| 0      | 0      | 0      | 0      | 0      | 0      | 0      | 0      | 0      |
| 0      | 0      | 0      | 0      | 0      | 0      | 0      | 0      | 0      |
| 0      | 0      | 0      | 0      | 0      | 0      | 0      | 0      | 0      |
| 0      | 0      | 0      | 0      | 0      | 0      | 0      | 0      | 0      |
| 0      | 0      | 0      | 0      | 0      | 0      | 0      | 0      | 0      |
| 0      | 0      | 0      | 0      | 0      | 0      | 0      | 0      | 0      |
| 0      | 0      | 0      | 0      | 0      | 0      | 0      | 0      | 0      |
| 0      | 0      | 0      | 0      | 0      | 0      | 0      | 0      | 0      |
| 0      | 0      | 0      | 0      | 0      | 0      | 0      | 0      | 0      |
| 0      | 0      | 0      | 0      | 0      | 0      | 0      | 0      | 0      |
| 0      | 0      | 0      | 0      | 0      | 0      | 0      | 0      | 0      |
| 0      | 0      | 0      | 0      | 0      | 0      | 0      | 0      | 0      |
| 0      | 0      | 0      | 0      | 0      | 0      | 0      | 0      | 0      |
| 0      | 0      | 0      | 0      | 0      | 0      | 0      | 0      | 0      |
| 0      | 0      | 0      | 0      | 0      | 0      | 0      | 0      | 0      |
| 0      | 0      | 0      | 0      | 0      | 0      | 0      | 0      | 0      |
| 0      | 0      | 0      | 0      | 0      | 0      | 0      | 0      | 0      |
| 0      | 0      | 0      | 0      | 0      | 0      | 0      | 0      | 0      |
| 0      | 0      | 0      | 0      | 0      | 0      | 0      | 0      | 0      |
| 0.0011 | 0.0029 | 0.0023 | 0.0025 | 0.002  | 0.0023 | 0.0023 | 0.0026 | 0.0023 |
| 0.0003 | 0.001  | 0.0009 | 0.0009 | 0.0007 | 0.0009 | 0.0007 | 0.0008 | 0.0005 |
| 0      | 0      | 0      | 0      | 0      | 0      | 0      | 0      | 0      |
| 0.0007 | 0.0013 | 0.0011 | 0.0013 | 0.0011 | 0.0011 | 0.0013 | 0.0013 | 0.0013 |
| 0.0007 | 0.0011 | 0.0009 | 0.0012 | 0.0009 | 0.0011 | 0.0012 | 0.0014 | 0.0013 |
| 0.0001 | 0.0009 | 0.0008 | 0.0007 | 0.0006 | 0.0009 | 0.0006 | 0.0007 | 0.0007 |
| 0.0001 | 0.0046 | 0.0044 | 0.0043 | 0.0032 | 0.0052 | 0.0037 | 0.0039 | 0.0035 |
| 0      | 0.0073 | 0.0063 | 0.0064 | 0.0043 | 0.0073 | 0.0053 | 0.0056 | 0.0046 |
| 0.0193 | 0.0544 | 0.0445 | 0.0486 | 0.0365 | 0.0469 | 0.0409 | 0.0419 | 0.0295 |
| 0.1093 | 0.1833 | 0.1464 | 0.1649 | 0.1173 | 0.1398 | 0.1475 | 0.1454 | 0.1161 |

|         |        |        |        |        |        |        |        |        |
|---------|--------|--------|--------|--------|--------|--------|--------|--------|
| 0.2275  | 0.3356 | 0.2629 | 0.2951 | 0.2009 | 0.254  | 0.2481 | 0.2369 | 0.2065 |
| 0.2718  | 0.3713 | 0.2688 | 0.2919 | 0.2051 | 0.2626 | 0.2539 | 0.2067 | 0.1598 |
| 0.0869  | 0.2435 | 0.1893 | 0.2363 | 0.175  | 0.228  | 0.1609 | 0.1274 | 0.0748 |
| 0.1064  | 0.261  | 0.2006 | 0.186  | 0.1095 | 0.1742 | 0.1438 | 0.1401 | 0.0874 |
| 0.0477  | 0.1508 | 0.1338 | 0.1421 | 0.1056 | 0.1389 | 0.1266 | 0.125  | 0.1134 |
| 0.0344  | 0.1188 | 0.0983 | 0.1116 | 0.0681 | 0.0966 | 0.0743 | 0.0792 | 0.0515 |
| -0.0148 | 0.1197 | 0.1017 | 0.1149 | 0.0854 | 0.1184 | 0.0941 | 0.0852 | 0.0603 |
| 0.2082  | 0.3379 | 0.2691 | 0.2798 | 0.2165 | 0.2724 | 0.2606 | 0.2449 | 0.2007 |
| 0.1956  | 0.2895 | 0.2116 | 0.2367 | 0.1686 | 0.1899 | 0.1822 | 0.165  | 0.1485 |
| 0.0682  | 0.1459 | 0.1157 | 0.1306 | 0.0949 | 0.1228 | 0.1093 | 0.1065 | 0.0944 |
| 0.053   | 0.1362 | 0.1053 | 0.1234 | 0.093  | 0.1255 | 0.1013 | 0.1025 | 0.0936 |
| 0.075   | 0.1987 | 0.1422 | 0.1505 | 0.1121 | 0.164  | 0.1345 | 0.1204 | 0.0918 |
| 0.0771  | 0.1645 | 0.1206 | 0.1497 | 0.1147 | 0.1439 | 0.1426 | 0.1465 | 0.1265 |
| 0.0353  | 0.07   | 0.0594 | 0.0756 | 0.0554 | 0.0616 | 0.0758 | 0.0812 | 0.0802 |
| 0.0055  | 0.0098 | 0.0086 | 0.0097 | 0.0084 | 0.0088 | 0.01   | 0.0108 | 0.0109 |
| 0.0008  | 0.0012 | 0.0011 | 0.0014 | 0.0012 | 0.0012 | 0.0014 | 0.0014 | 0.0014 |
| 0       | 0      | 0      | 0      | 0      | 0      | 0      | 0      | 0      |
| 0.0003  | 0.0006 | 0.0005 | 0.0006 | 0.0005 | 0.0005 | 0.0006 | 0.0007 | 0.0007 |
| 0       | 0      | 0      | 0      | 0      | 0      | 0      | 0      | 0      |
| 0       | 0      | 0      | 0      | 0      | 0      | 0      | 0      | 0      |
| 0.0003  | 0.0006 | 0.0005 | 0.0006 | 0.0005 | 0.0006 | 0.0007 | 0.0007 | 0.0007 |
| 0       | 0      | 0      | 0      | 0      | 0      | 0      | 0      | 0      |
| 0       | 0      | 0      | 0      | 0      | 0      | 0      | 0      | 0      |
| 0       | 0      | 0      | 0      | 0      | 0      | 0      | 0      | 0      |
| 0       | 0      | 0      | 0      | 0      | 0      | 0      | 0      | 0      |
| 0       | 0      | 0      | 0      | 0      | 0      | 0      | 0      | 0      |
| 0       | 0      | 0      | 0      | 0      | 0      | 0      | 0      | 0      |
| 0       | 0      | 0      | 0      | 0      | 0      | 0      | 0      | 0      |
| 0       | 0      | 0      | 0      | 0      | 0      | 0      | 0      | 0      |
| 0       | 0      | 0      | 0      | 0      | 0      | 0      | 0      | 0      |
| 0       | 0      | 0      | 0      | 0      | 0      | 0      | 0      | 0      |
| 0       | 0      | 0      | 0      | 0      | 0      | 0      | 0      | 0      |
| 0       | 0      | 0      | 0      | 0      | 0      | 0      | 0      | 0      |
| 0       | 0      | 0      | 0      | 0      | 0      | 0      | 0      | 0      |
| 0       | 0      | 0      | 0      | 0      | 0      | 0      | 0      | 0      |
| 0       | 0      | 0      | 0      | 0      | 0      | 0      | 0      | 0      |
| 0       | 0      | 0      | 0      | 0      | 0      | 0      | 0      | 0      |
| 0       | 0      | 0      | 0      | 0      | 0      | 0      | 0      | 0      |
| 0       | 0      | 0      | 0      | 0      | 0      | 0      | 0      | 0      |
| 0       | 0      | 0      | 0      | 0      | 0      | 0      | 0      | 0      |
| 0       | 0      | 0      | 0      | 0      | 0      | 0      | 0      | 0      |
| 0       | 0      | 0      | 0      | 0      | 0      | 0      | 0      | 0      |
| 0       | 0      | 0      | 0      | 0      | 0      | 0      | 0      | 0      |
| 0       | 0      | 0      | 0      | 0      | 0      | 0      | 0      | 0      |
| 0       | 0      | 0      | 0      | 0      | 0      | 0      | 0      | 0      |
| 0       | 0      | 0      | 0      | 0      | 0      | 0      | 0      | 0      |
| 0       | 0      | 0      | 0      | 0      | 0      | 0      | 0      | 0      |
| 0       | 0      | 0      | 0      | 0      | 0      | 0      | 0      | 0      |
| 0       | 0      | 0      | 0      | 0      | 0      | 0      | 0      | 0      |
| 0       | 0      | 0      | 0      | 0      | 0      | 0      | 0      | 0      |
| 0       | 0      | 0      | 0      | 0      | 0      | 0      | 0      | 0      |
| 0       | 0      | 0      | 0      | 0      | 0      | 0      | 0      | 0      |
| 0       | 0      | 0      | 0      | 0      | 0      | 0      | 0      | 0      |
| 0.0006  | 0.001  | 0.0008 | 0.0011 | 0.0009 | 0.001  | 0.0011 | 0.0012 | 0.0011 |
| 0.0005  | 0.0019 | 0.0018 | 0.0019 | 0.0016 | 0.002  | 0.0018 | 0.002  | 0.0018 |
| 0.0007  | 0.0029 | 0.0023 | 0.0025 | 0.0018 | 0.0026 | 0.0019 | 0.0021 | 0.0019 |
| 0.0005  | 0.0026 | 0.0023 | 0.0026 | 0.002  | 0.0024 | 0.0021 | 0.0022 | 0.0018 |









|        |        |        |        |        |        |        |        |        |
|--------|--------|--------|--------|--------|--------|--------|--------|--------|
| 0      | 0      | 0      | 0      | 0      | 0      | 0      | 0      | 0      |
| 0.0004 | 0.0007 | 0.0006 | 0.0006 | 0.0006 | 0.0006 | 0.0007 | 0.0008 | 0.0008 |
| 0      | 0      | 0      | 0      | 0      | 0      | 0      | 0      | 0      |
| 0      | 0      | 0      | 0      | 0      | 0      | 0      | 0      | 0      |
| 0      | 0      | 0      | 0      | 0      | 0      | 0      | 0      | 0      |
| 0      | 0      | 0      | 0      | 0      | 0      | 0      | 0      | 0      |
| 0      | 0      | 0      | 0      | 0      | 0      | 0      | 0      | 0      |
| 0      | 0      | 0      | 0      | 0      | 0      | 0      | 0      | 0      |
| 0      | 0      | 0      | 0      | 0      | 0      | 0      | 0      | 0      |
| 0      | 0      | 0      | 0      | 0      | 0      | 0      | 0      | 0      |
| 0      | 0      | 0      | 0      | 0      | 0      | 0      | 0      | 0      |
| 0      | 0      | 0      | 0      | 0      | 0      | 0      | 0      | 0      |
| 0      | 0      | 0      | 0      | 0      | 0      | 0      | 0      | 0      |
| 0      | 0      | 0      | 0      | 0      | 0      | 0      | 0      | 0      |
| 0      | 0      | 0      | 0      | 0      | 0      | 0      | 0      | 0      |
| 0      | 0      | 0      | 0      | 0      | 0      | 0      | 0      | 0      |
| 0      | 0      | 0      | 0      | 0      | 0      | 0      | 0      | 0      |
| 0      | 0      | 0      | 0      | 0      | 0      | 0      | 0      | 0      |
| 0      | 0      | 0      | 0      | 0      | 0      | 0      | 0      | 0      |
| 0      | 0      | 0      | 0      | 0      | 0      | 0      | 0      | 0      |
| 0      | 0      | 0      | 0      | 0      | 0      | 0      | 0      | 0      |
| 0      | 0      | 0      | 0      | 0      | 0      | 0      | 0      | 0      |
| 0      | 0      | 0      | 0      | 0      | 0      | 0      | 0      | 0      |
| 0      | 0      | 0      | 0      | 0      | 0      | 0      | 0      | 0      |
| 0      | 0      | 0      | 0      | 0      | 0      | 0      | 0      | 0      |
| 0      | 0      | 0      | 0      | 0      | 0      | 0      | 0      | 0      |
| 0      | 0      | 0      | 0      | 0      | 0      | 0      | 0      | 0      |
| 0      | 0      | 0      | 0      | 0      | 0      | 0      | 0      | 0      |
| 0      | 0      | 0      | 0      | 0      | 0      | 0      | 0      | 0      |
| 0      | 0      | 0      | 0      | 0      | 0      | 0      | 0      | 0      |
| 0      | 0      | 0      | 0      | 0      | 0      | 0      | 0      | 0      |
| 0      | 0      | 0      | 0      | 0      | 0      | 0      | 0      | 0      |
| 0      | 0      | 0      | 0      | 0      | 0      | 0      | 0      | 0      |
| 0      | 0      | 0      | 0      | 0      | 0      | 0      | 0      | 0      |
| 0      | 0      | 0      | 0      | 0      | 0      | 0      | 0      | 0      |
| 0      | 0      | 0      | 0      | 0      | 0      | 0      | 0      | 0      |
| 0      | 0      | 0      | 0      | 0      | 0      | 0      | 0      | 0      |
| 0.0005 | 0.0033 | 0.0032 | 0.0032 | 0.0026 | 0.0033 | 0.0027 | 0.0029 | 0.0023 |
| 0.1299 | 0.1945 | 0.1304 | 0.1428 | 0.0915 | 0.1156 | 0.1173 | 0.0954 | 0.0743 |
| 0.4222 | 0.5996 | 0.4282 | 0.4642 | 0.3132 | 0.3837 | 0.3321 | 0.3363 | 0.3046 |
| 0.1506 | 0.317  | 0.2485 | 0.2555 | 0.1811 | 0.2383 | 0.186  | 0.18   | 0.1235 |
| 0.0618 | 0.2163 | 0.1865 | 0.1986 | 0.1795 | 0.2203 | 0.18   | 0.1819 | 0.137  |
| 0.0569 | 0.2162 | 0.1805 | 0.183  | 0.1251 | 0.1457 | 0.1099 | 0.1158 | 0.0951 |
| 0.0152 | 0.1472 | 0.1338 | 0.1335 | 0.1076 | 0.1422 | 0.111  | 0.1095 | 0.0997 |
| 0.0404 | 0.1833 | 0.1599 | 0.1618 | 0.1148 | 0.1613 | 0.1326 | 0.1259 | 0.0885 |
| 0.2055 | 0.3285 | 0.249  | 0.2748 | 0.1873 | 0.2253 | 0.2226 | 0.1843 | 0.1332 |
| 0.4854 | 0.7128 | 0.4472 | 0.4897 | 0.3434 | 0.5415 | 0.5453 | 0.5105 | 0.4116 |
| 0.1804 | 0.3463 | 0.2327 | 0.2627 | 0.1437 | 0.1985 | 0.2137 | 0.176  | 0.1451 |
| 0.0339 | 0.1254 | 0.1098 | 0.1195 | 0.085  | 0.1048 | 0.0883 | 0.1028 | 0.094  |
| 0.3021 | 0.409  | 0.2947 | 0.3287 | 0.2379 | 0.2699 | 0.2804 | 0.2313 | 0.2098 |
| 0.4845 | 0.6759 | 0.4618 | 0.5141 | 0.3381 | 0.4368 | 0.4324 | 0.3649 | 0.2839 |
| 0.3172 | 0.4864 | 0.3544 | 0.4075 | 0.2857 | 0.3352 | 0.3552 | 0.3063 | 0.2608 |
| 0.1261 | 0.1899 | 0.1416 | 0.1647 | 0.1221 | 0.1479 | 0.1591 | 0.1502 | 0.1503 |



|        |        |        |        |        |        |        |        |        |
|--------|--------|--------|--------|--------|--------|--------|--------|--------|
| 0.0061 | 0.0138 | 0.0129 | 0.0155 | 0.0112 | 0.0112 | 0.0105 | 0.0118 | 0.0101 |
| 0.0029 | 0.0043 | 0.0037 | 0.0038 | 0.0034 | 0.0038 | 0.004  | 0.0044 | 0.0043 |
| 0      | 0      | 0      | 0      | 0      | 0      | 0      | 0      | 0      |
| 0      | 0.003  | 0.0027 | 0.0025 | 0.0021 | 0.0026 | 0.0018 | 0.002  | 0.0017 |
| 0.0004 | 0.001  | 0.0008 | 0.0011 | 0.0008 | 0.001  | 0.001  | 0.0011 | 0.0013 |
| 0      | 0      | 0      | 0      | 0      | 0      | 0      | 0      | 0      |
| 0      | 0      | 0      | 0      | 0      | 0      | 0      | 0      | 0      |
| 0.0008 | 0.0012 | 0.0011 | 0.0013 | 0.001  | 0.0011 | 0.0012 | 0.0014 | 0.0014 |
| 0      | 0      | 0      | 0      | 0      | 0      | 0      | 0      | 0      |
| 0      | 0      | 0      | 0      | 0      | 0      | 0      | 0      | 0      |
| 0      | 0      | 0      | 0      | 0      | 0      | 0      | 0      | 0      |
| 0      | 0      | 0      | 0      | 0      | 0      | 0      | 0      | 0      |
| 0      | 0      | 0      | 0      | 0      | 0      | 0      | 0      | 0      |
| 0      | 0      | 0      | 0      | 0      | 0      | 0      | 0      | 0      |
| 0      | 0      | 0      | 0      | 0      | 0      | 0      | 0      | 0      |
| 0      | 0      | 0      | 0      | 0      | 0      | 0      | 0      | 0      |
| 0      | 0      | 0      | 0      | 0      | 0      | 0      | 0      | 0      |
| 0      | 0      | 0      | 0      | 0      | 0      | 0      | 0      | 0      |
| 0      | 0      | 0      | 0      | 0      | 0      | 0      | 0      | 0      |
| 0      | 0      | 0      | 0      | 0      | 0      | 0      | 0      | 0      |
| 0      | 0      | 0      | 0      | 0      | 0      | 0      | 0      | 0      |
| 0      | 0      | 0      | 0      | 0      | 0      | 0      | 0      | 0      |
| 0      | 0      | 0      | 0      | 0      | 0      | 0      | 0      | 0      |
| 0      | 0      | 0      | 0      | 0      | 0      | 0      | 0      | 0      |
| 0      | 0      | 0      | 0      | 0      | 0      | 0      | 0      | 0      |
| 0      | 0      | 0      | 0      | 0      | 0      | 0      | 0      | 0      |
| 0      | 0      | 0      | 0      | 0      | 0      | 0      | 0      | 0      |
| 0      | 0      | 0      | 0      | 0      | 0      | 0      | 0      | 0      |
| 0      | 0      | 0      | 0      | 0      | 0      | 0      | 0      | 0      |
| 0      | 0      | 0      | 0      | 0      | 0      | 0      | 0      | 0      |
| 0      | 0      | 0      | 0      | 0      | 0      | 0      | 0      | 0      |
| 0      | 0      | 0      | 0      | 0      | 0      | 0      | 0      | 0      |
| 0      | 0      | 0      | 0      | 0      | 0      | 0      | 0      | 0      |
| 0      | 0      | 0      | 0      | 0      | 0      | 0      | 0      | 0      |
| 0      | 0      | 0      | 0      | 0      | 0      | 0      | 0      | 0      |
| 0      | 0      | 0      | 0      | 0      | 0      | 0      | 0      | 0      |
| 0      | 0      | 0      | 0      | 0      | 0      | 0      | 0      | 0      |
| 0      | 0      | 0      | 0      | 0      | 0      | 0      | 0      | 0      |
| 0      | 0      | 0      | 0      | 0      | 0      | 0      | 0      | 0      |
| 0      | 0      | 0      | 0      | 0      | 0      | 0      | 0      | 0      |
| 0      | 0      | 0      | 0      | 0      | 0      | 0      | 0      | 0      |
| 0      | 0      | 0      | 0      | 0      | 0      | 0      | 0      | 0      |
| 0      | 0      | 0      | 0      | 0      | 0      | 0      | 0      | 0      |
| 0      | 0      | 0      | 0      | 0      | 0      | 0      | 0      | 0      |
| 0      | 0      | 0      | 0      | 0      | 0      | 0      | 0      | 0      |
| 0      | 0      | 0      | 0      | 0      | 0      | 0      | 0      | 0      |
| 0      | 0      | 0      | 0      | 0      | 0      | 0      | 0      | 0      |
| 0      | 0      | 0      | 0      | 0      | 0      | 0      | 0      | 0      |
| 0      | 0      | 0      | 0      | 0      | 0      | 0      | 0      | 0      |
| 0      | 0      | 0      | 0      | 0      | 0      | 0      | 0      | 0      |
| 0      | 0      | 0      | 0      | 0      | 0      | 0      | 0      | 0      |
| 0      | 0      | 0      | 0      | 0      | 0      | 0      | 0      | 0      |
| 0.1335 | 0.1659 | 0.1153 | 0.1104 | 0.0721 | 0.0959 | 0.0914 | 0.0762 | 0.0615 |
| 0.052  | 0.0726 | 0.0452 | 0.0493 | 0.0294 | 0.0429 | 0.04   | 0.0368 | 0.0281 |
| 0.2389 | 0.3439 | 0.2278 | 0.2786 | 0.1942 | 0.2739 | 0.2679 | 0.2063 | 0.1799 |
| 0.1509 | 0.3128 | 0.2598 | 0.2685 | 0.1996 | 0.2651 | 0.2414 | 0.1932 | 0.1112 |
| 0.0032 | 0.1965 | 0.1663 | 0.1816 | 0.1523 | 0.2003 | 0.147  | 0.1403 | 0.1084 |
| 0.0806 | 0.2435 | 0.1808 | 0.1868 | 0.1403 | 0.1708 | 0.1282 | 0.1308 | 0.0836 |
| 0.0046 | 0.1434 | 0.1156 | 0.1258 | 0.0739 | 0.1058 | 0.0811 | 0.0916 | 0.0691 |
| 0.1232 | 0.2599 | 0.2042 | 0.2126 | 0.1537 | 0.2123 | 0.1881 | 0.1746 | 0.1417 |
| 0.2216 | 0.3827 | 0.2822 | 0.3    | 0.2261 | 0.2751 | 0.2486 | 0.2061 | 0.145  |
| 0.254  | 0.4635 | 0.3142 | 0.3522 | 0.2228 | 0.3279 | 0.2718 | 0.2087 | 0.1553 |

|         |        |        |        |        |        |        |        |        |
|---------|--------|--------|--------|--------|--------|--------|--------|--------|
| 0.0572  | 0.2009 | 0.1931 | 0.1964 | 0.1351 | 0.1609 | 0.1008 | 0.1127 | 0.0755 |
| 0.2097  | 0.3568 | 0.2864 | 0.3049 | 0.2028 | 0.2586 | 0.2504 | 0.223  | 0.1946 |
| 0.4939  | 0.7063 | 0.4725 | 0.5681 | 0.3193 | 0.4859 | 0.5203 | 0.3725 | 0.3088 |
| 0.5324  | 0.6745 | 0.4603 | 0.5394 | 0.3191 | 0.4517 | 0.4519 | 0.4285 | 0.4172 |
| 0.123   | 0.1869 | 0.1458 | 0.1747 | 0.131  | 0.1558 | 0.1748 | 0.1727 | 0.1605 |
| 0.0695  | 0.0985 | 0.0873 | 0.1    | 0.0828 | 0.0895 | 0.093  | 0.0962 | 0.0967 |
| 0.0083  | 0.0152 | 0.0128 | 0.0144 | 0.0107 | 0.0126 | 0.0127 | 0.0138 | 0.0133 |
| 0.0011  | 0.0019 | 0.0017 | 0.0023 | 0.0018 | 0.0019 | 0.0023 | 0.0025 | 0.0026 |
| 0       | 0      | 0      | 0      | 0      | 0      | 0      | 0      | 0      |
| 0.0005  | 0.0031 | 0.0031 | 0.0034 | 0.0027 | 0.0035 | 0.0026 | 0.003  | 0.0022 |
| 0.001   | 0.0016 | 0.0014 | 0.0017 | 0.0015 | 0.0015 | 0.0017 | 0.0019 | 0.002  |
| 0       | 0      | 0      | 0      | 0      | 0      | 0      | 0      | 0      |
| -0.0002 | 0.0006 | 0.0006 | 0.0006 | 0.0005 | 0.0006 | 0.0004 | 0.0005 | 0.0003 |
| 0.0003  | 0.0005 | 0.0004 | 0.0006 | 0.0005 | 0.0005 | 0.0007 | 0.0008 | 0.0008 |
| 0       | 0      | 0      | 0      | 0      | 0      | 0      | 0      | 0      |
| 0       | 0      | 0      | 0      | 0      | 0      | 0      | 0      | 0      |
| 0       | 0      | 0      | 0      | 0      | 0      | 0      | 0      | 0      |
| 0       | 0      | 0      | 0      | 0      | 0      | 0      | 0      | 0      |
| 0       | 0      | 0      | 0      | 0      | 0      | 0      | 0      | 0      |
| 0       | 0      | 0      | 0      | 0      | 0      | 0      | 0      | 0      |
| 0       | 0      | 0      | 0      | 0      | 0      | 0      | 0      | 0      |
| 0       | 0      | 0      | 0      | 0      | 0      | 0      | 0      | 0      |
| 0       | 0      | 0      | 0      | 0      | 0      | 0      | 0      | 0      |
| 0       | 0      | 0      | 0      | 0      | 0      | 0      | 0      | 0      |
| 0       | 0      | 0      | 0      | 0      | 0      | 0      | 0      | 0      |
| 0       | 0      | 0      | 0      | 0      | 0      | 0      | 0      | 0      |
| 0       | 0      | 0      | 0      | 0      | 0      | 0      | 0      | 0      |
| 0       | 0      | 0      | 0      | 0      | 0      | 0      | 0      | 0      |
| 0       | 0      | 0      | 0      | 0      | 0      | 0      | 0      | 0      |
| 0       | 0      | 0      | 0      | 0      | 0      | 0      | 0      | 0      |
| 0       | 0      | 0      | 0      | 0      | 0      | 0      | 0      | 0      |
| 0       | 0      | 0      | 0      | 0      | 0      | 0      | 0      | 0      |
| 0       | 0      | 0      | 0      | 0      | 0      | 0      | 0      | 0      |
| 0       | 0      | 0      | 0      | 0      | 0      | 0      | 0      | 0      |
| 0       | 0      | 0      | 0      | 0      | 0      | 0      | 0      | 0      |
| 0       | 0      | 0      | 0      | 0      | 0      | 0      | 0      | 0      |
| 0       | 0      | 0      | 0      | 0      | 0      | 0      | 0      | 0      |
| 0       | 0      | 0      | 0      | 0      | 0      | 0      | 0      | 0      |
| 0       | 0      | 0      | 0      | 0      | 0      | 0      | 0      | 0      |
| 0       | 0      | 0      | 0      | 0      | 0      | 0      | 0      | 0      |
| 0       | 0      | 0      | 0      | 0      | 0      | 0      | 0      | 0      |
| 0.0007  | 0.0087 | 0.0085 | 0.0089 | 0.0078 | 0.0112 | 0.0092 | 0.0085 | 0.0067 |
| 0.0099  | 0.0158 | 0.014  | 0.0178 | 0.0142 | 0.017  | 0.0189 | 0.0219 | 0.0216 |
| 0.0248  | 0.0504 | 0.0386 | 0.0457 | 0.0319 | 0.0402 | 0.0406 | 0.0363 | 0.0335 |
| 0.0222  | 0.1314 | 0.1086 | 0.1289 | 0.0894 | 0.1161 | 0.0984 | 0.0998 | 0.0678 |









|         |        |        |        |        |        |        |        |        |
|---------|--------|--------|--------|--------|--------|--------|--------|--------|
| 0       | 0      | 0      | 0      | 0      | 0      | 0      | 0      | 0      |
| 0       | 0      | 0      | 0      | 0      | 0      | 0      | 0      | 0      |
| 0       | 0      | 0      | 0      | 0      | 0      | 0      | 0      | 0      |
| 0       | 0      | 0      | 0      | 0      | 0      | 0      | 0      | 0      |
| 0       | 0      | 0      | 0      | 0      | 0      | 0      | 0      | 0      |
| 0       | 0      | 0      | 0      | 0      | 0      | 0      | 0      | 0      |
| 0       | 0      | 0      | 0      | 0      | 0      | 0      | 0      | 0      |
| 0       | 0      | 0      | 0      | 0      | 0      | 0      | 0      | 0      |
| 0       | 0      | 0      | 0      | 0      | 0      | 0      | 0      | 0      |
| 0       | 0      | 0      | 0      | 0      | 0      | 0      | 0      | 0      |
| 0       | 0      | 0      | 0      | 0      | 0      | 0      | 0      | 0      |
| 0       | 0      | 0      | 0      | 0      | 0      | 0      | 0      | 0      |
| 0       | 0      | 0      | 0      | 0      | 0      | 0      | 0      | 0      |
| 0       | 0      | 0      | 0      | 0      | 0      | 0      | 0      | 0      |
| 0       | 0      | 0      | 0      | 0      | 0      | 0      | 0      | 0      |
| 0       | 0      | 0      | 0      | 0      | 0      | 0      | 0      | 0      |
| 0       | 0      | 0      | 0      | 0      | 0      | 0      | 0      | 0      |
| 0       | 0      | 0      | 0      | 0      | 0      | 0      | 0      | 0      |
| 0       | 0      | 0      | 0      | 0      | 0      | 0      | 0      | 0      |
| 0       | 0      | 0      | 0      | 0      | 0      | 0      | 0      | 0      |
| 0.0417  | 0.0682 | 0.0427 | 0.05   | 0.0307 | 0.0466 | 0.0451 | 0.0366 | 0.0297 |
| 0.1768  | 0.2715 | 0.1993 | 0.2351 | 0.1529 | 0.2104 | 0.2038 | 0.183  | 0.1494 |
| 0.1057  | 0.153  | 0.1119 | 0.1258 | 0.0962 | 0.1147 | 0.1217 | 0.1162 | 0.0982 |
| 0.2346  | 0.3086 | 0.2346 | 0.2566 | 0.1812 | 0.2148 | 0.2164 | 0.2166 | 0.1917 |
| 0.1672  | 0.2301 | 0.1691 | 0.1758 | 0.1216 | 0.1634 | 0.1594 | 0.1519 | 0.1392 |
| 0.0045  | 0.019  | 0.017  | 0.0185 | 0.0156 | 0.0196 | 0.017  | 0.0185 | 0.0181 |
| 0.0344  | 0.0864 | 0.0733 | 0.0839 | 0.0705 | 0.0782 | 0.0743 | 0.075  | 0.0733 |
| 0.0485  | 0.0916 | 0.0697 | 0.0759 | 0.0583 | 0.0762 | 0.0725 | 0.0682 | 0.0566 |
| 0.2029  | 0.3285 | 0.2236 | 0.2185 | 0.1542 | 0.1976 | 0.1881 | 0.1664 | 0.1271 |
| 0.003   | 0.02   | 0.0179 | 0.0196 | 0.015  | 0.019  | 0.0162 | 0.018  | 0.0148 |
| 0.0022  | 0.0039 | 0.0034 | 0.0043 | 0.0037 | 0.0038 | 0.0043 | 0.0046 | 0.0045 |
| 0.1858  | 0.2642 | 0.1839 | 0.2165 | 0.1428 | 0.1802 | 0.1688 | 0.1456 | 0.1175 |
| 0.0894  | 0.2408 | 0.1939 | 0.1977 | 0.1372 | 0.169  | 0.1502 | 0.1255 | 0.0896 |
| 0.0403  | 0.1545 | 0.1243 | 0.1298 | 0.0801 | 0.1194 | 0.0862 | 0.0753 | 0.0587 |
| 0.2288  | 0.3528 | 0.2504 | 0.2599 | 0.1606 | 0.2187 | 0.2298 | 0.1816 | 0.1707 |
| 0.0438  | 0.1373 | 0.11   | 0.1121 | 0.0731 | 0.111  | 0.093  | 0.0804 | 0.053  |
| 0.0024  | 0.0102 | 0.0104 | 0.0094 | 0.0082 | 0.0103 | 0.0087 | 0.009  | 0.0064 |
| 0.0009  | 0.0026 | 0.0023 | 0.0023 | 0.0018 | 0.0022 | 0.0018 | 0.0019 | 0.0014 |
| 0.0006  | 0.0015 | 0.0014 | 0.0014 | 0.0011 | 0.0015 | 0.0013 | 0.0014 | 0.0013 |
| -0.0002 | 0.0013 | 0.0011 | 0.0011 | 0.0008 | 0.0013 | 0.0009 | 0.0008 | 0.0007 |
| 0       | 0      | 0      | 0      | 0      | 0      | 0      | 0      | 0      |
| 0.0004  | 0.0006 | 0.0005 | 0.0006 | 0.0005 | 0.0006 | 0.0007 | 0.0007 | 0.0007 |
| 0.0008  | 0.002  | 0.0017 | 0.0019 | 0.0014 | 0.0019 | 0.0016 | 0.0016 | 0.0014 |
| 0.0005  | 0.001  | 0.001  | 0.0013 | 0.001  | 0.0011 | 0.0013 | 0.0013 | 0.0014 |

|        |        |        |        |        |        |        |        |        |   |
|--------|--------|--------|--------|--------|--------|--------|--------|--------|---|
| 0      | 0      | 0      | 0      | 0      | 0      | 0      | 0      | 0      | 0 |
| 0      | 0      | 0      | 0      | 0      | 0      | 0      | 0      | 0      | 0 |
| 0      | 0      | 0      | 0      | 0      | 0      | 0      | 0      | 0      | 0 |
| 0      | 0      | 0      | 0      | 0      | 0      | 0      | 0      | 0      | 0 |
| 0      | 0      | 0      | 0      | 0      | 0      | 0      | 0      | 0      | 0 |
| 0      | 0      | 0      | 0      | 0      | 0      | 0      | 0      | 0      | 0 |
| 0      | 0      | 0      | 0      | 0      | 0      | 0      | 0      | 0      | 0 |
| 0      | 0      | 0      | 0      | 0      | 0      | 0      | 0      | 0      | 0 |
| 0      | 0      | 0      | 0      | 0      | 0      | 0      | 0      | 0      | 0 |
| 0      | 0      | 0      | 0      | 0      | 0      | 0      | 0      | 0      | 0 |
| 0      | 0      | 0      | 0      | 0      | 0      | 0      | 0      | 0      | 0 |
| 0      | 0      | 0      | 0      | 0      | 0      | 0      | 0      | 0      | 0 |
| 0      | 0      | 0      | 0      | 0      | 0      | 0      | 0      | 0      | 0 |
| 0      | 0      | 0      | 0      | 0      | 0      | 0      | 0      | 0      | 0 |
| 0      | 0      | 0      | 0      | 0      | 0      | 0      | 0      | 0      | 0 |
| 0      | 0      | 0      | 0      | 0      | 0      | 0      | 0      | 0      | 0 |
| 0      | 0      | 0      | 0      | 0      | 0      | 0      | 0      | 0      | 0 |
| 0      | 0      | 0      | 0      | 0      | 0      | 0      | 0      | 0      | 0 |
| 0      | 0      | 0      | 0      | 0      | 0      | 0      | 0      | 0      | 0 |
| 0      | 0      | 0      | 0      | 0      | 0      | 0      | 0      | 0      | 0 |
| 0      | 0      | 0      | 0      | 0      | 0      | 0      | 0      | 0      | 0 |
| 0      | 0      | 0      | 0      | 0      | 0      | 0      | 0      | 0      | 0 |
| 0      | 0      | 0      | 0      | 0      | 0      | 0      | 0      | 0      | 0 |
| 0      | 0      | 0      | 0      | 0      | 0      | 0      | 0      | 0      | 0 |
| 0      | 0      | 0      | 0      | 0      | 0      | 0      | 0      | 0      | 0 |
| 0      | 0      | 0      | 0      | 0      | 0      | 0      | 0      | 0      | 0 |
| 0.0913 | 0.1448 | 0.0923 | 0.1167 | 0.0597 | 0.0891 | 0.0957 | 0.0734 | 0.0491 |   |
| 0.3931 | 0.5002 | 0.347  | 0.3835 | 0.2287 | 0.3022 | 0.3034 | 0.2128 | 0.1448 |   |
| 0.1402 | 0.1967 | 0.1237 | 0.1358 | 0.0691 | 0.1108 | 0.121  | 0.1108 | 0.1063 |   |
| 0.0317 | 0.0491 | 0.0407 | 0.0403 | 0.0279 | 0.0336 | 0.0322 | 0.0279 | 0.0233 |   |
| 0.0655 | 0.0995 | 0.0699 | 0.0746 | 0.0464 | 0.066  | 0.0651 | 0.0595 | 0.0562 |   |
| 0.0077 | 0.0145 | 0.0138 | 0.0149 | 0.0133 | 0.0147 | 0.0159 | 0.018  | 0.0168 |   |
| 0.1434 | 0.2213 | 0.1621 | 0.1822 | 0.122  | 0.1558 | 0.1643 | 0.1532 | 0.1313 |   |
| 0.1797 | 0.2912 | 0.2059 | 0.2115 | 0.1316 | 0.167  | 0.1767 | 0.146  | 0.1139 |   |
| 0.0995 | 0.1515 | 0.113  | 0.1309 | 0.0952 | 0.121  | 0.127  | 0.1153 | 0.1022 |   |
| 0.256  | 0.3383 | 0.2144 | 0.2493 | 0.1626 | 0.2381 | 0.2348 | 0.2108 | 0.169  |   |
| 0.5032 | 0.6757 | 0.5081 | 0.5398 | 0.3829 | 0.4719 | 0.4388 | 0.3448 | 0.2759 |   |
| 0.4019 | 0.5262 | 0.307  | 0.3824 | 0.2313 | 0.3472 | 0.3393 | 0.2515 | 0.1729 |   |
| 0.0075 | 0.0347 | 0.0318 | 0.0336 | 0.0274 | 0.0347 | 0.0285 | 0.0312 | 0.0274 |   |
| 0.2454 | 0.3379 | 0.2477 | 0.2415 | 0.1622 | 0.2029 | 0.1942 | 0.1637 | 0.1395 |   |
| 0.5205 | 0.6793 | 0.4654 | 0.46   | 0.292  | 0.3978 | 0.4346 | 0.3429 | 0.2345 |   |
| 0.1934 | 0.2724 | 0.1943 | 0.1802 | 0.1246 | 0.1602 | 0.1611 | 0.1443 | 0.1226 |   |
| 0.0032 | 0.0136 | 0.0122 | 0.0113 | 0.0088 | 0.0105 | 0.0087 | 0.0092 | 0.0074 |   |
| 0.0003 | 0.0031 | 0.0029 | 0.0032 | 0.0024 | 0.0031 | 0.0023 | 0.0025 | 0.0022 |   |





|        |        |        |        |        |        |        |        |        |
|--------|--------|--------|--------|--------|--------|--------|--------|--------|
| 0.0605 | 0.079  | 0.0559 | 0.0591 | 0.0352 | 0.0487 | 0.0459 | 0.0376 | 0.028  |
| 0.0527 | 0.0693 | 0.0445 | 0.0527 | 0.0291 | 0.0366 | 0.0386 | 0.0328 | 0.0311 |
| 0.0545 | 0.0704 | 0.0492 | 0.0558 | 0.0403 | 0.0493 | 0.0476 | 0.0396 | 0.0306 |
| 0.0583 | 0.0689 | 0.0399 | 0.0436 | 0.0291 | 0.0432 | 0.0427 | 0.0329 | 0.0214 |
| 0      | 0      | 0      | 0      | 0      | 0      | 0      | 0      | 0      |
| 0      | 0      | 0      | 0      | 0      | 0      | 0      | 0      | 0      |
| 0      | 0      | 0      | 0      | 0      | 0      | 0      | 0      | 0      |
| 0      | 0      | 0      | 0      | 0      | 0      | 0      | 0      | 0      |
| 0      | 0      | 0      | 0      | 0      | 0      | 0      | 0      | 0      |
| 0      | 0      | 0      | 0      | 0      | 0      | 0      | 0      | 0      |
| 0      | 0      | 0      | 0      | 0      | 0      | 0      | 0      | 0      |
| 0      | 0      | 0      | 0      | 0      | 0      | 0      | 0      | 0      |
| 0      | 0      | 0      | 0      | 0      | 0      | 0      | 0      | 0      |
| 0      | 0      | 0      | 0      | 0      | 0      | 0      | 0      | 0      |
| 0      | 0      | 0      | 0      | 0      | 0      | 0      | 0      | 0      |
| 0      | 0      | 0      | 0      | 0      | 0      | 0      | 0      | 0      |
| 0      | 0      | 0      | 0      | 0      | 0      | 0      | 0      | 0      |
| 0      | 0      | 0      | 0      | 0      | 0      | 0      | 0      | 0      |
| 0      | 0      | 0      | 0      | 0      | 0      | 0      | 0      | 0      |
| 0      | 0      | 0      | 0      | 0      | 0      | 0      | 0      | 0      |
| 0      | 0      | 0      | 0      | 0      | 0      | 0      | 0      | 0      |
| 0      | 0      | 0      | 0      | 0      | 0      | 0      | 0      | 0      |
| 0      | 0      | 0      | 0      | 0      | 0      | 0      | 0      | 0      |
| 0      | 0      | 0      | 0      | 0      | 0      | 0      | 0      | 0      |
| 0      | 0      | 0      | 0      | 0      | 0      | 0      | 0      | 0      |
| 0      | 0      | 0      | 0      | 0      | 0      | 0      | 0      | 0      |
| 0      | 0      | 0      | 0      | 0      | 0      | 0      | 0      | 0      |
| 0      | 0      | 0      | 0      | 0      | 0      | 0      | 0      | 0      |
| 0      | 0      | 0      | 0      | 0      | 0      | 0      | 0      | 0      |
| 0      | 0      | 0      | 0      | 0      | 0      | 0      | 0      | 0      |
| 0      | 0      | 0      | 0      | 0      | 0      | 0      | 0      | 0      |
| 0      | 0      | 0      | 0      | 0      | 0      | 0      | 0      | 0      |
| 0      | 0      | 0      | 0      | 0      | 0      | 0      | 0      | 0      |
| 0.0191 | 0.0241 | 0.0177 | 0.0175 | 0.0114 | 0.0163 | 0.0157 | 0.0134 | 0.013  |
| 0.0182 | 0.0229 | 0.0161 | 0.0179 | 0.0115 | 0.015  | 0.0158 | 0.0123 | 0.008  |
| 0.016  | 0.0207 | 0.0138 | 0.0145 | 0.009  | 0.0125 | 0.0119 | 0.0099 | 0.0074 |
| 0.0165 | 0.0211 | 0.0142 | 0.0163 | 0.009  | 0.0134 | 0.0122 | 0.0082 | 0.0062 |
| 0.0215 | 0.025  | 0.0171 | 0.0179 | 0.0101 | 0.014  | 0.0147 | 0.0103 | 0.0072 |
| 0.0165 | 0.0217 | 0.015  | 0.016  | 0.0094 | 0.0133 | 0.013  | 0.0102 | 0.0077 |















|        |        |        |        |        |        |        |        |        |
|--------|--------|--------|--------|--------|--------|--------|--------|--------|
| 0      | 0      | 0      | 0      | 0      | 0      | 0      | 0      | 0      |
| 0      | 0      | 0      | 0      | 0      | 0      | 0      | 0      | 0      |
| 0      | 0      | 0      | 0      | 0      | 0      | 0      | 0      | 0      |
| 0      | 0      | 0      | 0      | 0      | 0      | 0      | 0      | 0      |
| 0      | 0      | 0      | 0      | 0      | 0      | 0      | 0      | 0      |
| 0      | 0      | 0      | 0      | 0      | 0      | 0      | 0      | 0      |
| 0      | 0      | 0      | 0      | 0      | 0      | 0      | 0      | 0      |
| 0      | 0      | 0      | 0      | 0      | 0      | 0      | 0      | 0      |
| 0      | 0      | 0      | 0      | 0      | 0      | 0      | 0      | 0      |
| 0      | 0      | 0      | 0      | 0      | 0      | 0      | 0      | 0      |
| 0      | 0      | 0      | 0      | 0      | 0      | 0      | 0      | 0      |
| 0      | 0      | 0      | 0      | 0      | 0      | 0      | 0      | 0      |
| 0      | 0      | 0      | 0      | 0      | 0      | 0      | 0      | 0      |
| 0      | 0      | 0      | 0      | 0      | 0      | 0      | 0      | 0      |
| 0      | 0      | 0      | 0      | 0      | 0      | 0      | 0      | 0      |
| 0      | 0      | 0      | 0      | 0      | 0      | 0      | 0      | 0      |
| 0      | 0      | 0      | 0      | 0      | 0      | 0      | 0      | 0      |
| 0      | 0      | 0      | 0      | 0      | 0      | 0      | 0      | 0      |
| 0      | 0      | 0      | 0      | 0      | 0      | 0      | 0      | 0      |
| 0      | 0      | 0      | 0      | 0      | 0      | 0      | 0      | 0      |
| 0      | 0      | 0      | 0      | 0      | 0      | 0      | 0      | 0      |
| 0      | 0      | 0      | 0      | 0      | 0      | 0      | 0      | 0      |
| 0      | 0      | 0      | 0      | 0      | 0      | 0      | 0      | 0      |
| 0      | 0      | 0      | 0      | 0      | 0      | 0      | 0      | 0      |
| 0      | 0      | 0      | 0      | 0      | 0      | 0      | 0      | 0      |
| 0      | 0      | 0      | 0      | 0      | 0      | 0      | 0      | 0      |
| 0      | 0      | 0      | 0      | 0      | 0      | 0      | 0      | 0      |
| 0      | 0      | 0      | 0      | 0      | 0      | 0      | 0      | 0      |
| 0      | 0      | 0      | 0      | 0      | 0      | 0      | 0      | 0      |
| 0      | 0      | 0      | 0      | 0      | 0      | 0      | 0      | 0      |
| 0      | 0      | 0      | 0      | 0      | 0      | 0      | 0      | 0      |
| 0      | 0      | 0      | 0      | 0      | 0      | 0      | 0      | 0      |
| 0      | 0      | 0      | 0      | 0      | 0      | 0      | 0      | 0      |
| 0      | 0      | 0      | 0      | 0      | 0      | 0      | 0      | 0      |
| 0      | 0      | 0      | 0      | 0      | 0      | 0      | 0      | 0      |
| 0      | 0      | 0      | 0      | 0      | 0      | 0      | 0      | 0      |
| 0      | 0      | 0      | 0      | 0      | 0      | 0      | 0      | 0      |
| 0      | 0      | 0      | 0      | 0      | 0      | 0      | 0      | 0      |
| 0      | 0      | 0      | 0      | 0      | 0      | 0      | 0      | 0      |
| 0      | 0      | 0      | 0      | 0      | 0      | 0      | 0      | 0      |
| 0      | 0      | 0      | 0      | 0      | 0      | 0      | 0      | 0      |
| 0      | 0      | 0      | 0      | 0      | 0      | 0      | 0      | 0      |
| 0      | 0      | 0      | 0      | 0      | 0      | 0      | 0      | 0      |
| 0      | 0      | 0      | 0      | 0      | 0      | 0      | 0      | 0      |
| 0      | 0      | 0      | 0      | 0      | 0      | 0      | 0      | 0      |
| 0      | 0      | 0      | 0      | 0      | 0      | 0      | 0      | 0      |
| 0      | 0      | 0      | 0      | 0      | 0      | 0      | 0      | 0      |
| 0      | 0      | 0      | 0      | 0      | 0      | 0      | 0      | 0      |
| 0      | 0      | 0      | 0      | 0      | 0      | 0      | 0      | 0      |
| 0      | 0      | 0      | 0      | 0      | 0      | 0      | 0      | 0      |
| 0      | 0      | 0      | 0      | 0      | 0      | 0      | 0      | 0      |
| 0      | 0      | 0      | 0      | 0      | 0      | 0      | 0      | 0      |
| 0      | 0      | 0      | 0      | 0      | 0      | 0      | 0      | 0      |
| 0      | 0      | 0      | 0      | 0      | 0      | 0      | 0      | 0      |
| 0      | 0      | 0      | 0      | 0      | 0      | 0      | 0      | 0      |
| 0      | 0      | 0      | 0      | 0      | 0      | 0      | 0      | 0      |
| 0      | 0      | 0      | 0      | 0      | 0      | 0      | 0      | 0      |
| 0      | 0      | 0      | 0      | 0      | 0      | 0      | 0      | 0      |
| 0      | 0      | 0      | 0      | 0      | 0      | 0      | 0      | 0      |
| 0      | 0      | 0      | 0      | 0      | 0      | 0      | 0      | 0      |
| 0      | 0      | 0      | 0      | 0      | 0      | 0      | 0      | 0      |
| 0      | 0      | 0      | 0      | 0      | 0      | 0      | 0      | 0      |
| 0      | 0      | 0      | 0      | 0      | 0      | 0      | 0      | 0      |
| 0      | 0      | 0      | 0      | 0      | 0      | 0      | 0      | 0      |
| 0      | 0      | 0      | 0      | 0      | 0      | 0      | 0      | 0      |
| 0      | 0      | 0      | 0      | 0      | 0      | 0      | 0      | 0      |
| 0      | 0      | 0      | 0      | 0      | 0      | 0      | 0      | 0      |
| 0      | 0      | 0      | 0      | 0      | 0      | 0      | 0      | 0      |
| 0      | 0      | 0      | 0      | 0      | 0      | 0      | 0      | 0      |
| 0.0009 | 0.0017 | 0.0013 | 0.0016 | 0.0012 | 0.0015 | 0.0016 | 0.0018 | 0.0018 |
| 0.001  | 0.0014 | 0.0012 | 0.0014 | 0.0011 | 0.0012 | 0.0014 | 0.0016 | 0.0015 |
| 0.0003 | 0.0005 | 0.0004 | 0.0005 | 0.0003 | 0.0004 | 0.0005 | 0.0006 | 0.0006 |
| 0      | 0      | 0      | 0      | 0      | 0      | 0      | 0      | 0      |
| 0      | 0      | 0      | 0      | 0      | 0      | 0      | 0      | 0      |
| 0      | 0      | 0      | 0      | 0      | 0      | 0      | 0      | 0      |
| 0.0004 | 0.0006 | 0.0005 | 0.0006 | 0.0006 | 0.0006 | 0.0006 | 0.0007 | 0.0006 |
| 0.0003 | 0.0005 | 0.0004 | 0.0005 | 0.0004 | 0.0004 | 0.0005 | 0.0006 | 0.0006 |
| 0.008  | 0.0097 | 0.0068 | 0.0073 | 0.0042 | 0.0056 | 0.0055 | 0.0036 | 0.0031 |
| 0.0076 | 0.0095 | 0.0069 | 0.0071 | 0.0033 | 0.0045 | 0.0043 | 0.0027 | 0.0013 |
| 0.0081 | 0.0109 | 0.0072 | 0.008  | 0.0059 | 0.0072 | 0.0064 | 0.004  | 0.0027 |
| 0.0075 | 0.0109 | 0.0073 | 0.0085 | 0.0057 | 0.0074 | 0.0069 | 0.006  | 0.0043 |
| 0.0072 | 0.0089 | 0.0055 | 0.0062 | 0.0038 | 0.0055 | 0.0061 | 0.0048 | 0.0042 |
| 0.0068 | 0.0091 | 0.0062 | 0.0066 | 0.0042 | 0.0058 | 0.0057 | 0.0049 | 0.0033 |





















































|        |        |        |        |        |
|--------|--------|--------|--------|--------|
| 0      | 0      | 0      | 0      | 0      |
| 0      | 0      | 0      | 0      | 0      |
| 0      | 0      | 0      | 0      | 0      |
| 0      | 0      | 0      | 0      | 0      |
| 0      | 0      | 0      | 0      | 0      |
| 0      | 0      | 0      | 0      | 0      |
| 0      | 0      | 0      | 0      | 0      |
| 0      | 0      | 0      | 0      | 0      |
| 0      | 0      | 0      | 0      | 0      |
| 0      | 0      | 0      | 0      | 0      |
| 0      | 0      | 0      | 0      | 0      |
| 0      | 0      | 0      | 0      | 0      |
| 0      | 0      | 0      | 0      | 0      |
| 0      | 0      | 0      | 0      | 0      |
| 0      | 0      | 0      | 0      | 0      |
| 0      | 0      | 0      | 0      | 0      |
| 0      | 0      | 0      | 0      | 0      |
| 0      | 0      | 0      | 0      | 0      |
| 0      | 0      | 0      | 0      | 0      |
| 0      | 0      | 0      | 0      | 0      |
| 0      | 0      | 0      | 0      | 0      |
| 0      | 0      | 0      | 0      | 0      |
| 0      | 0      | 0      | 0      | 0      |
| 0      | 0      | 0      | 0      | 0      |
| 0      | 0      | 0      | 0      | 0      |
| 0      | 0      | 0      | 0      | 0      |
| 0      | 0      | 0      | 0      | 0      |
| 0.0044 | 0.0056 | 0.005  | 0.0036 | 0.0056 |
| 0.0037 | 0.005  | 0.0052 | 0.0028 | 0.0051 |
| 0.0062 | 0.0076 | 0.0072 | 0.0053 | 0.0054 |
| 0.0021 | 0.0032 | 0.0025 | 0.0012 | 0.0035 |
| 0.0046 | 0.0054 | 0.0051 | 0.0038 | 0.0054 |
| 0.0059 | 0.0077 | 0.0058 | 0.0042 | 0.0063 |
| 0.0077 | 0.0088 | 0.0082 | 0.0062 | 0.008  |
| 0.0052 | 0.0063 | 0.0055 | 0.0037 | 0.0058 |
| 0.0006 | 0.0006 | 0.0006 | 0.0006 | 0.0005 |
| 0      | 0      | 0      | 0      | 0      |
| 0      | 0      | 0      | 0      | 0      |
| 0      | 0      | 0      | 0      | 0      |













|        |        |        |        |        |
|--------|--------|--------|--------|--------|
| 0      | 0      | 0      | 0      | 0      |
| 0      | 0      | 0      | 0      | 0      |
| 0      | 0      | 0      | 0      | 0      |
| 0      | 0      | 0      | 0      | 0      |
| 0      | 0      | 0      | 0      | 0      |
| 0      | 0      | 0      | 0      | 0      |
| 0      | 0      | 0      | 0      | 0      |
| 0      | 0      | 0      | 0      | 0      |
| 0      | 0      | 0      | 0      | 0      |
| 0      | 0      | 0      | 0      | 0      |
| 0      | 0      | 0      | 0      | 0      |
| 0      | 0      | 0      | 0      | 0      |
| 0      | 0      | 0      | 0      | 0      |
| 0      | 0      | 0      | 0      | 0      |
| 0      | 0      | 0      | 0      | 0      |
| 0      | 0      | 0      | 0      | 0      |
| 0      | 0      | 0      | 0      | 0      |
| 0      | 0      | 0      | 0      | 0      |
| 0      | 0      | 0      | 0      | 0      |
| 0      | 0      | 0      | 0      | 0      |
| 0.0009 | 0.0012 | 0.0013 | 0.001  | 0.001  |
| 0.0006 | 0.0006 | 0.0007 | 0.0007 | 0.0006 |
| 0      | 0      | 0      | 0      | 0      |
| 0      | 0      | 0      | 0      | 0      |
| 0.0044 | 0.0045 | 0.0049 | 0.0046 | 0.0045 |
| 0.0114 | 0.0123 | 0.0128 | 0.0116 | 0.0105 |
| 0.1469 | 0.1766 | 0.1681 | 0.1197 | 0.1567 |
| 0.3027 | 0.3514 | 0.296  | 0.2215 | 0.3141 |
| 0.1808 | 0.1885 | 0.1531 | 0.099  | 0.1425 |
| 0.0792 | 0.0888 | 0.0895 | 0.0776 | 0.0817 |
| 0.1643 | 0.1792 | 0.1728 | 0.1409 | 0.1565 |
| 0.0628 | 0.0753 | 0.0663 | 0.0545 | 0.0602 |
| 0.0243 | 0.0479 | 0.0341 | 0.033  | 0.0486 |
| 0.3403 | 0.3654 | 0.2923 | 0.2245 | 0.2814 |
| 0.0953 | 0.1162 | 0.0816 | 0.0527 | 0.0883 |
| 0.0412 | 0.0478 | 0.042  | 0.0314 | 0.0468 |
| 0.0177 | 0.0232 | 0.0175 | 0.0146 | 0.0251 |
| 0.1425 | 0.1636 | 0.1546 | 0.1253 | 0.1365 |
| 0.1752 | 0.192  | 0.1899 | 0.1523 | 0.1674 |
| 0.023  | 0.0265 | 0.0258 | 0.0222 | 0.0243 |
| 0.012  | 0.014  | 0.013  | 0.0124 | 0.0137 |
| 0.0901 | 0.1011 | 0.096  | 0.0854 | 0.0945 |
| 0.0051 | 0.0056 | 0.0057 | 0.0055 | 0.0049 |
| 0.0006 | 0.0007 | 0.0008 | 0.0007 | 0.0007 |
| 0      | 0      | 0      | 0      | 0      |
| 0.0007 | 0.0007 | 0.0007 | 0.0006 | 0.0006 |



|        |        |        |        |        |
|--------|--------|--------|--------|--------|
| 0      | 0      | 0      | 0      | 0      |
| 0      | 0      | 0      | 0      | 0      |
| 0.0006 | 0.0007 | 0.0007 | 0.0007 | 0.0007 |
| 0      | 0      | 0      | 0      | 0      |
| 0      | 0      | 0      | 0      | 0      |
| 0      | 0      | 0      | 0      | 0      |
| 0      | 0      | 0      | 0      | 0      |
| 0      | 0      | 0      | 0      | 0      |
| 0      | 0      | 0      | 0      | 0      |
| 0      | 0      | 0      | 0      | 0      |
| 0      | 0      | 0      | 0      | 0      |
| 0      | 0      | 0      | 0      | 0      |
| 0      | 0      | 0      | 0      | 0      |
| 0      | 0      | 0      | 0      | 0      |
| 0      | 0      | 0      | 0      | 0      |
| 0      | 0      | 0      | 0      | 0      |
| 0      | 0      | 0      | 0      | 0      |
| 0      | 0      | 0      | 0      | 0      |
| 0      | 0      | 0      | 0      | 0      |
| 0      | 0      | 0      | 0      | 0      |
| 0      | 0      | 0      | 0      | 0      |
| 0      | 0      | 0      | 0      | 0      |
| 0.0009 | 0.0011 | 0.0012 | 0.0012 | 0.0012 |
| 0      | 0      | 0      | 0      | 0      |
| 0      | 0      | 0      | 0      | 0      |
| 0.0007 | 0.0007 | 0.0008 | 0.0008 | 0.0008 |
| 0.0007 | 0.0007 | 0.0007 | 0.0006 | 0.0005 |
| 0      | 0      | 0      | 0      | 0      |
| 0.0023 | 0.0029 | 0.0027 | 0.0026 | 0.0026 |
| 0.0046 | 0.0064 | 0.0062 | 0.0054 | 0.0066 |
| 0.0551 | 0.0652 | 0.0642 | 0.051  | 0.0626 |
| 0.1061 | 0.1201 | 0.0963 | 0.0628 | 0.0801 |
| 0.0592 | 0.0739 | 0.0655 | 0.0529 | 0.0711 |
| 0.0253 | 0.0327 | 0.0325 | 0.0313 | 0.0314 |
| 0.052  | 0.0541 | 0.0552 | 0.0517 | 0.0528 |
| 0.0583 | 0.0697 | 0.0659 | 0.0604 | 0.0578 |
| 0.0989 | 0.1303 | 0.1273 | 0.1092 | 0.1133 |
| 0.1094 | 0.1513 | 0.1306 | 0.0927 | 0.1743 |
| 0.0948 | 0.1304 | 0.1118 | 0.0886 | 0.12   |
| 0.0799 | 0.0984 | 0.0948 | 0.0811 | 0.1012 |
| 0.1141 | 0.1359 | 0.1287 | 0.1057 | 0.1444 |
| 0.1332 | 0.1543 | 0.1433 | 0.1243 | 0.1434 |
| 0.1845 | 0.2075 | 0.2033 | 0.1808 | 0.1835 |
| 0.133  | 0.1488 | 0.1391 | 0.1241 | 0.1294 |

|        |        |        |        |        |
|--------|--------|--------|--------|--------|
| 0.0381 | 0.0476 | 0.0369 | 0.0274 | 0.0424 |
| 0.0557 | 0.0771 | 0.0612 | 0.0427 | 0.0619 |
| 0.0057 | 0.0058 | 0.0061 | 0.0059 | 0.0054 |
| 0.0007 | 0.0007 | 0.0007 | 0.0007 | 0.0007 |
| 0      | 0      | 0      | 0      | 0      |
| 0.0008 | 0.0008 | 0.0007 | 0.0007 | 0.0006 |
| 0      | 0      | 0      | 0      | 0      |
| 0      | 0      | 0      | 0      | 0      |
| 0.0007 | 0.0008 | 0.0008 | 0.0008 | 0.0007 |
| 0      | 0      | 0      | 0      | 0      |
| 0      | 0      | 0      | 0      | 0      |
| 0      | 0      | 0      | 0      | 0      |
| 0      | 0      | 0      | 0      | 0      |
| 0      | 0      | 0      | 0      | 0      |
| 0      | 0      | 0      | 0      | 0      |
| 0      | 0      | 0      | 0      | 0      |
| 0      | 0      | 0      | 0      | 0      |
| 0      | 0      | 0      | 0      | 0      |
| 0      | 0      | 0      | 0      | 0      |
| 0      | 0      | 0      | 0      | 0      |
| 0      | 0      | 0      | 0      | 0      |
| 0      | 0      | 0      | 0      | 0      |
| 0      | 0      | 0      | 0      | 0      |
| 0      | 0      | 0      | 0      | 0      |
| 0      | 0      | 0      | 0      | 0      |
| 0      | 0      | 0      | 0      | 0      |
| 0      | 0      | 0      | 0      | 0      |
| 0      | 0      | 0      | 0      | 0      |
| 0.0029 | 0.0033 | 0.0032 | 0.0031 | 0.003  |
| 0.0005 | 0.0006 | 0.0005 | 0.0005 | 0.0005 |
| 0      | 0      | 0      | 0      | 0      |
| 0.0006 | 0.0007 | 0.0007 | 0.0006 | 0.0006 |
| 0.0018 | 0.0019 | 0.002  | 0.0017 | 0.0014 |
| 0.0011 | 0.0012 | 0.0011 | 0.0009 | 0.0014 |
| 0.0038 | 0.0059 | 0.0049 | 0.0053 | 0.0062 |
| 0.0081 | 0.0082 | 0.0087 | 0.0088 | 0.0075 |
| 0.0594 | 0.0687 | 0.0609 | 0.064  | 0.0606 |
| 0.0257 | 0.0331 | 0.0367 | 0.0369 | 0.0383 |
| 0.1352 | 0.1533 | 0.1474 | 0.1277 | 0.141  |
| 0.1731 | 0.1869 | 0.1793 | 0.1542 | 0.1678 |
| 0.0697 | 0.0898 | 0.0839 | 0.0827 | 0.0943 |
| 0.0901 | 0.1036 | 0.0904 | 0.0854 | 0.1049 |
| 0.0949 | 0.1057 | 0.1005 | 0.0985 | 0.1172 |
| 0.0771 | 0.105  | 0.0977 | 0.0944 | 0.0956 |

|        |        |        |        |        |
|--------|--------|--------|--------|--------|
| 0.0888 | 0.1128 | 0.1026 | 0.0823 | 0.0972 |
| 0.1289 | 0.1646 | 0.1468 | 0.1395 | 0.1689 |
| 0.1317 | 0.1642 | 0.1503 | 0.1332 | 0.1639 |
| 0.1219 | 0.1462 | 0.1406 | 0.125  | 0.1325 |
| 0.1543 | 0.1605 | 0.1614 | 0.1437 | 0.1388 |
| 0.1613 | 0.178  | 0.1716 | 0.1444 | 0.1451 |
| 0.0922 | 0.1045 | 0.096  | 0.081  | 0.0903 |
| 0.0337 | 0.0367 | 0.0322 | 0.0233 | 0.0328 |
| 0.009  | 0.0096 | 0.0094 | 0.0088 | 0.008  |
| 0.0013 | 0.0014 | 0.0014 | 0.0013 | 0.0012 |
| 0      | 0      | 0      | 0      | 0      |
| 0.0006 | 0.0007 | 0.0007 | 0.0007 | 0.0006 |
| 0      | 0      | 0      | 0      | 0      |
| 0      | 0      | 0      | 0      | 0      |
| 0.0005 | 0.0006 | 0.0006 | 0.0006 | 0.0005 |
| 0      | 0      | 0      | 0      | 0      |
| 0      | 0      | 0      | 0      | 0      |
| 0      | 0      | 0      | 0      | 0      |
| 0      | 0      | 0      | 0      | 0      |
| 0      | 0      | 0      | 0      | 0      |
| 0      | 0      | 0      | 0      | 0      |
| 0      | 0      | 0      | 0      | 0      |
| 0      | 0      | 0      | 0      | 0      |
| 0      | 0      | 0      | 0      | 0      |
| 0      | 0      | 0      | 0      | 0      |
| 0      | 0      | 0      | 0      | 0      |
| 0      | 0      | 0      | 0      | 0      |
| 0      | 0      | 0      | 0      | 0      |
| 0      | 0      | 0      | 0      | 0      |
| 0      | 0      | 0      | 0      | 0      |
| 0      | 0      | 0      | 0      | 0      |
| 0      | 0      | 0      | 0      | 0      |
| 0      | 0      | 0      | 0      | 0      |
| 0      | 0      | 0      | 0      | 0      |
| 0      | 0      | 0      | 0      | 0      |
| 0.0023 | 0.0026 | 0.0029 | 0.0029 | 0.0024 |
| 0.0005 | 0.0008 | 0.0006 | 0.0005 | 0.0006 |
| 0      | 0      | 0      | 0      | 0      |
| 0.0014 | 0.0016 | 0.0016 | 0.0015 | 0.0013 |
| 0.0013 | 0.0014 | 0.0015 | 0.0014 | 0.0013 |
| 0.0007 | 0.0008 | 0.0008 | 0.0008 | 0.0009 |
| 0.0031 | 0.0035 | 0.003  | 0.0029 | 0.0031 |
| 0.0046 | 0.0063 | 0.006  | 0.0047 | 0.0055 |
| 0.0297 | 0.034  | 0.0326 | 0.0275 | 0.0366 |
| 0.1267 | 0.16   | 0.1543 | 0.1408 | 0.1534 |

|        |        |        |        |        |
|--------|--------|--------|--------|--------|
| 0.2212 | 0.2743 | 0.2505 | 0.2133 | 0.2499 |
| 0.1646 | 0.208  | 0.2028 | 0.1423 | 0.1843 |
| 0.0883 | 0.1471 | 0.141  | 0.1154 | 0.1737 |
| 0.0695 | 0.1025 | 0.1082 | 0.1028 | 0.1318 |
| 0.109  | 0.1371 | 0.1257 | 0.116  | 0.128  |
| 0.0481 | 0.0696 | 0.062  | 0.0606 | 0.0651 |
| 0.0518 | 0.0677 | 0.0561 | 0.065  | 0.0748 |
| 0.2026 | 0.2409 | 0.2331 | 0.1909 | 0.2369 |
| 0.1759 | 0.2138 | 0.2046 | 0.1622 | 0.1871 |
| 0.0931 | 0.1183 | 0.1136 | 0.0975 | 0.1083 |
| 0.0762 | 0.0996 | 0.1006 | 0.0886 | 0.0967 |
| 0.0907 | 0.1241 | 0.112  | 0.0999 | 0.1191 |
| 0.128  | 0.1438 | 0.135  | 0.1127 | 0.1334 |
| 0.0827 | 0.094  | 0.0965 | 0.0972 | 0.0845 |
| 0.0101 | 0.0116 | 0.0112 | 0.0099 | 0.0093 |
| 0.0014 | 0.0015 | 0.0015 | 0.0015 | 0.0013 |
| 0      | 0      | 0      | 0      | 0      |
| 0.0006 | 0.0007 | 0.0007 | 0.0007 | 0.0006 |
| 0      | 0      | 0      | 0      | 0      |
| 0      | 0      | 0      | 0      | 0      |
| 0.0007 | 0.0008 | 0.0008 | 0.0008 | 0.0008 |
| 0      | 0      | 0      | 0      | 0      |
| 0      | 0      | 0      | 0      | 0      |
| 0      | 0      | 0      | 0      | 0      |
| 0      | 0      | 0      | 0      | 0      |
| 0      | 0      | 0      | 0      | 0      |
| 0      | 0      | 0      | 0      | 0      |
| 0      | 0      | 0      | 0      | 0      |
| 0      | 0      | 0      | 0      | 0      |
| 0      | 0      | 0      | 0      | 0      |
| 0      | 0      | 0      | 0      | 0      |
| 0      | 0      | 0      | 0      | 0      |
| 0      | 0      | 0      | 0      | 0      |
| 0      | 0      | 0      | 0      | 0      |
| 0      | 0      | 0      | 0      | 0      |
| 0      | 0      | 0      | 0      | 0      |
| 0      | 0      | 0      | 0      | 0      |
| 0      | 0      | 0      | 0      | 0      |
| 0      | 0      | 0      | 0      | 0      |
| 0      | 0      | 0      | 0      | 0      |
| 0      | 0      | 0      | 0      | 0      |
| 0.0012 | 0.0013 | 0.0014 | 0.0012 | 0.0012 |
| 0.0017 | 0.002  | 0.0022 | 0.0023 | 0.0021 |
| 0.0019 | 0.0021 | 0.0024 | 0.0022 | 0.0021 |
| 0.0014 | 0.0019 | 0.0019 | 0.0018 | 0.0018 |







|        |        |        |        |        |
|--------|--------|--------|--------|--------|
| 0      | 0      | 0      | 0      | 0      |
| 0      | 0      | 0      | 0      | 0      |
| 0      | 0      | 0      | 0      | 0      |
| 0      | 0      | 0      | 0      | 0      |
| 0      | 0      | 0      | 0      | 0      |
| 0      | 0      | 0      | 0      | 0      |
| 0      | 0      | 0      | 0      | 0      |
| 0      | 0      | 0      | 0      | 0      |
| 0      | 0      | 0      | 0      | 0      |
| 0      | 0      | 0      | 0      | 0      |
| 0      | 0      | 0      | 0      | 0      |
| 0      | 0      | 0      | 0      | 0      |
| 0      | 0      | 0      | 0      | 0      |
| 0.0011 | 0.0014 | 0.0013 | 0.0011 | 0.0012 |
| 0.0009 | 0.0011 | 0.0011 | 0.0009 | 0.0008 |
| 0.0004 | 0.0009 | 0.0008 | 0.0011 | 0.0011 |
| 0.0008 | 0.0009 | 0.0009 | 0.0008 | 0.0008 |
| 0.002  | 0.0022 | 0.0024 | 0.0021 | 0.0022 |
| 0.0009 | 0.0011 | 0.0011 | 0.001  | 0.001  |
| 0.0014 | 0.0019 | 0.0019 | 0.0017 | 0.0018 |
| 0.0019 | 0.0025 | 0.0024 | 0.0019 | 0.0023 |
| 0.0235 | 0.0331 | 0.0289 | 0.0168 | 0.0273 |
| 0.0113 | 0.0126 | 0.0127 | 0.0119 | 0.0112 |
| 0.1106 | 0.1218 | 0.1165 | 0.0914 | 0.1201 |
| 0.1804 | 0.2389 | 0.2132 | 0.1665 | 0.1997 |
| 0.0614 | 0.1106 | 0.1207 | 0.0893 | 0.1155 |
| 0.0871 | 0.1356 | 0.1081 | 0.1046 | 0.1331 |
| 0.3096 | 0.3524 | 0.3183 | 0.1787 | 0.2784 |
| 0.2251 | 0.2415 | 0.228  | 0.1872 | 0.2228 |
| 0.3171 | 0.3455 | 0.3136 | 0.2562 | 0.3415 |
| 0.4544 | 0.5586 | 0.4742 | 0.4087 | 0.6312 |
| 0.334  | 0.4175 | 0.3432 | 0.2929 | 0.4519 |
| 0.1185 | 0.1443 | 0.1412 | 0.1245 | 0.1432 |
| 0.1093 | 0.1322 | 0.119  | 0.1044 | 0.1123 |
| 0.4655 | 0.5981 | 0.5069 | 0.3981 | 0.4901 |
| 0.4179 | 0.4398 | 0.3207 | 0.1979 | 0.3647 |
| 0.1482 | 0.1658 | 0.1721 | 0.1475 | 0.1624 |
| 0.0173 | 0.0186 | 0.0183 | 0.0169 | 0.0162 |
| 0.0013 | 0.0014 | 0.0014 | 0.0013 | 0.0012 |
| 0      | 0      | 0      | 0      | 0      |
| 0.0015 | 0.0016 | 0.0016 | 0.0015 | 0.0013 |
| 0.0024 | 0.0024 | 0.0023 | 0.002  | 0.0017 |
| 0      | 0      | 0      | 0      | 0      |



|        |        |        |        |        |
|--------|--------|--------|--------|--------|
| 0      | 0      | 0      | 0      | 0      |
| 0.0008 | 0.0007 | 0.0008 | 0.0007 | 0.0006 |
| 0      | 0      | 0      | 0      | 0      |
| 0      | 0      | 0      | 0      | 0      |
| 0      | 0      | 0      | 0      | 0      |
| 0      | 0      | 0      | 0      | 0      |
| 0      | 0      | 0      | 0      | 0      |
| 0      | 0      | 0      | 0      | 0      |
| 0      | 0      | 0      | 0      | 0      |
| 0      | 0      | 0      | 0      | 0      |
| 0      | 0      | 0      | 0      | 0      |
| 0      | 0      | 0      | 0      | 0      |
| 0      | 0      | 0      | 0      | 0      |
| 0      | 0      | 0      | 0      | 0      |
| 0      | 0      | 0      | 0      | 0      |
| 0      | 0      | 0      | 0      | 0      |
| 0      | 0      | 0      | 0      | 0      |
| 0      | 0      | 0      | 0      | 0      |
| 0      | 0      | 0      | 0      | 0      |
| 0      | 0      | 0      | 0      | 0      |
| 0      | 0      | 0      | 0      | 0      |
| 0      | 0      | 0      | 0      | 0      |
| 0      | 0      | 0      | 0      | 0      |
| 0      | 0      | 0      | 0      | 0      |
| 0.0021 | 0.0027 | 0.0027 | 0.0026 | 0.0026 |
| 0.0815 | 0.113  | 0.1051 | 0.083  | 0.1097 |
| 0.3161 | 0.4622 | 0.3932 | 0.3325 | 0.4447 |
| 0.1383 | 0.1804 | 0.1546 | 0.1236 | 0.1635 |
| 0.127  | 0.1615 | 0.1558 | 0.14   | 0.1655 |
| 0.0866 | 0.1131 | 0.0983 | 0.0801 | 0.113  |
| 0.0635 | 0.0997 | 0.0925 | 0.0716 | 0.0725 |
| 0.0636 | 0.1052 | 0.1084 | 0.1056 | 0.1225 |
| 0.1661 | 0.1912 | 0.1792 | 0.1683 | 0.19   |
| 0.4186 | 0.5574 | 0.4539 | 0.3828 | 0.4956 |
| 0.1676 | 0.1405 | 0.1074 | 0.0755 | 0.1239 |
| 0.089  | 0.1152 | 0.1142 | 0.1136 | 0.1231 |
| 0.2026 | 0.2385 | 0.2181 | 0.1712 | 0.2375 |
| 0.2918 | 0.3571 | 0.3206 | 0.2018 | 0.2858 |
| 0.2961 | 0.3284 | 0.2932 | 0.2295 | 0.2878 |
| 0.1696 | 0.1946 | 0.1869 | 0.1611 | 0.1708 |

|        |        |        |        |        |
|--------|--------|--------|--------|--------|
| 0.0106 | 0.0125 | 0.0127 | 0.0116 | 0.0116 |
| 0.0043 | 0.0046 | 0.0049 | 0.0044 | 0.004  |
| 0      | 0      | 0      | 0      | 0      |
| 0.0016 | 0.002  | 0.0019 | 0.0018 | 0.002  |
| 0.0012 | 0.0015 | 0.0016 | 0.0016 | 0.0014 |
| 0      | 0      | 0      | 0      | 0      |
| 0      | 0      | 0      | 0      | 0      |
| 0.0015 | 0.0016 | 0.0017 | 0.0016 | 0.0014 |
| 0      | 0      | 0      | 0      | 0      |
| 0      | 0      | 0      | 0      | 0      |
| 0      | 0      | 0      | 0      | 0      |
| 0      | 0      | 0      | 0      | 0      |
| 0      | 0      | 0      | 0      | 0      |
| 0      | 0      | 0      | 0      | 0      |
| 0      | 0      | 0      | 0      | 0      |
| 0      | 0      | 0      | 0      | 0      |
| 0      | 0      | 0      | 0      | 0      |
| 0      | 0      | 0      | 0      | 0      |
| 0      | 0      | 0      | 0      | 0      |
| 0      | 0      | 0      | 0      | 0      |
| 0      | 0      | 0      | 0      | 0      |
| 0      | 0      | 0      | 0      | 0      |
| 0      | 0      | 0      | 0      | 0      |
| 0      | 0      | 0      | 0      | 0      |
| 0      | 0      | 0      | 0      | 0      |
| 0      | 0      | 0      | 0      | 0      |
| 0      | 0      | 0      | 0      | 0      |
| 0      | 0      | 0      | 0      | 0      |
| 0      | 0      | 0      | 0      | 0      |
| 0      | 0      | 0      | 0      | 0      |
| 0      | 0      | 0      | 0      | 0      |
| 0      | 0      | 0      | 0      | 0      |
| 0      | 0      | 0      | 0      | 0      |
| 0.072  | 0.0804 | 0.0602 | 0.0468 | 0.0732 |
| 0.0351 | 0.0455 | 0.0373 | 0.0186 | 0.0336 |
| 0.1944 | 0.2417 | 0.1993 | 0.1317 | 0.1693 |
| 0.1313 | 0.1656 | 0.1641 | 0.1316 | 0.1752 |
| 0.076  | 0.1084 | 0.1136 | 0.1003 | 0.1159 |
| 0.0911 | 0.1333 | 0.1237 | 0.119  | 0.133  |
| 0.0465 | 0.0811 | 0.0801 | 0.0861 | 0.0847 |
| 0.1377 | 0.1647 | 0.1493 | 0.1301 | 0.1562 |
| 0.1887 | 0.248  | 0.1856 | 0.1163 | 0.1723 |
| 0.2002 | 0.2816 | 0.2472 | 0.1251 | 0.2016 |

|        |        |        |        |        |
|--------|--------|--------|--------|--------|
| 0.0632 | 0.0961 | 0.0924 | 0.0712 | 0.0917 |
| 0.2071 | 0.212  | 0.1769 | 0.1613 | 0.1944 |
| 0.3819 | 0.4238 | 0.2859 | 0.123  | 0.2732 |
| 0.4616 | 0.477  | 0.4292 | 0.3355 | 0.4369 |
| 0.1621 | 0.1753 | 0.1702 | 0.1454 | 0.163  |
| 0.0945 | 0.1016 | 0.1021 | 0.0945 | 0.0838 |
| 0.0131 | 0.0147 | 0.0145 | 0.0129 | 0.012  |
| 0.0027 | 0.003  | 0.003  | 0.0026 | 0.0025 |
| 0      | 0      | 0      | 0      | 0      |
| 0.002  | 0.0025 | 0.0026 | 0.0024 | 0.0027 |
| 0.0018 | 0.002  | 0.0022 | 0.0022 | 0.002  |
| 0      | 0      | 0      | 0      | 0      |
| 0.0003 | 0.0005 | 0.0005 | 0.0005 | 0.0007 |
| 0.0008 | 0.0008 | 0.0008 | 0.0008 | 0.0007 |
| 0      | 0      | 0      | 0      | 0      |
| 0      | 0      | 0      | 0      | 0      |
| 0      | 0      | 0      | 0      | 0      |
| 0      | 0      | 0      | 0      | 0      |
| 0      | 0      | 0      | 0      | 0      |
| 0      | 0      | 0      | 0      | 0      |
| 0      | 0      | 0      | 0      | 0      |
| 0      | 0      | 0      | 0      | 0      |
| 0      | 0      | 0      | 0      | 0      |
| 0      | 0      | 0      | 0      | 0      |
| 0      | 0      | 0      | 0      | 0      |
| 0      | 0      | 0      | 0      | 0      |
| 0      | 0      | 0      | 0      | 0      |
| 0      | 0      | 0      | 0      | 0      |
| 0      | 0      | 0      | 0      | 0      |
| 0      | 0      | 0      | 0      | 0      |
| 0      | 0      | 0      | 0      | 0      |
| 0      | 0      | 0      | 0      | 0      |
| 0      | 0      | 0      | 0      | 0      |
| 0      | 0      | 0      | 0      | 0      |
| 0      | 0      | 0      | 0      | 0      |
| 0      | 0      | 0      | 0      | 0      |
| 0      | 0      | 0      | 0      | 0      |
| 0.0054 | 0.0065 | 0.0065 | 0.007  | 0.0078 |
| 0.0206 | 0.0218 | 0.0223 | 0.0192 | 0.0183 |
| 0.0336 | 0.0397 | 0.038  | 0.034  | 0.0367 |
| 0.0639 | 0.0854 | 0.0959 | 0.0974 | 0.0989 |









|        |        |        |        |        |
|--------|--------|--------|--------|--------|
| 0      | 0      | 0      | 0      | 0      |
| 0      | 0      | 0      | 0      | 0      |
| 0      | 0      | 0      | 0      | 0      |
| 0      | 0      | 0      | 0      | 0      |
| 0      | 0      | 0      | 0      | 0      |
| 0      | 0      | 0      | 0      | 0      |
| 0      | 0      | 0      | 0      | 0      |
| 0      | 0      | 0      | 0      | 0      |
| 0      | 0      | 0      | 0      | 0      |
| 0      | 0      | 0      | 0      | 0      |
| 0      | 0      | 0      | 0      | 0      |
| 0      | 0      | 0      | 0      | 0      |
| 0      | 0      | 0      | 0      | 0      |
| 0      | 0      | 0      | 0      | 0      |
| 0      | 0      | 0      | 0      | 0      |
| 0      | 0      | 0      | 0      | 0      |
| 0      | 0      | 0      | 0      | 0      |
| 0      | 0      | 0      | 0      | 0      |
| 0      | 0      | 0      | 0      | 0      |
| 0      | 0      | 0      | 0      | 0      |
| 0.0406 | 0.0485 | 0.0442 | 0.027  | 0.0379 |
| 0.1581 | 0.1879 | 0.1814 | 0.1429 | 0.1871 |
| 0.1048 | 0.1182 | 0.1068 | 0.0855 | 0.1076 |
| 0.2125 | 0.234  | 0.2131 | 0.1692 | 0.2057 |
| 0.1461 | 0.1589 | 0.1487 | 0.1013 | 0.1371 |
| 0.0199 | 0.0235 | 0.0224 | 0.0204 | 0.0208 |
| 0.0728 | 0.0915 | 0.0875 | 0.0714 | 0.073  |
| 0.0541 | 0.0701 | 0.064  | 0.0534 | 0.0516 |
| 0.1301 | 0.1571 | 0.1461 | 0.0902 | 0.1386 |
| 0.0143 | 0.0174 | 0.0167 | 0.0168 | 0.0205 |
| 0.0048 | 0.0055 | 0.0051 | 0.0049 | 0.0045 |
| 0.1224 | 0.1333 | 0.0997 | 0.0758 | 0.1488 |
| 0.0951 | 0.1195 | 0.1213 | 0.119  | 0.1759 |
| 0.0376 | 0.0646 | 0.0578 | 0.0508 | 0.082  |
| 0.1813 | 0.2069 | 0.2038 | 0.1465 | 0.2248 |
| 0.0536 | 0.0855 | 0.0637 | 0.0476 | 0.0667 |
| 0.0051 | 0.0078 | 0.0058 | 0.0053 | 0.0063 |
| 0.0012 | 0.0016 | 0.0016 | 0.0014 | 0.0017 |
| 0.0012 | 0.0013 | 0.0013 | 0.0011 | 0.0011 |
| 0.0006 | 0.001  | 0.0008 | 0.0009 | 0.0011 |
| 0      | 0      | 0      | 0      | 0      |
| 0.0007 | 0.0007 | 0.0007 | 0.0006 | 0.0006 |
| 0.0014 | 0.0018 | 0.0017 | 0.0016 | 0.0016 |
| 0.0014 | 0.0016 | 0.0016 | 0.0015 | 0.0013 |



|        |        |        |        |        |
|--------|--------|--------|--------|--------|
| 0      | 0      | 0      | 0      | 0      |
| 0      | 0      | 0      | 0      | 0      |
| 0      | 0      | 0      | 0      | 0      |
| 0      | 0      | 0      | 0      | 0      |
| 0      | 0      | 0      | 0      | 0      |
| 0      | 0      | 0      | 0      | 0      |
| 0      | 0      | 0      | 0      | 0      |
| 0      | 0      | 0      | 0      | 0      |
| 0      | 0      | 0      | 0      | 0      |
| 0      | 0      | 0      | 0      | 0      |
| 0      | 0      | 0      | 0      | 0      |
| 0      | 0      | 0      | 0      | 0      |
| 0      | 0      | 0      | 0      | 0      |
| 0      | 0      | 0      | 0      | 0      |
| 0      | 0      | 0      | 0      | 0      |
| 0      | 0      | 0      | 0      | 0      |
| 0      | 0      | 0      | 0      | 0      |
| 0      | 0      | 0      | 0      | 0      |
| 0      | 0      | 0      | 0      | 0      |
| 0      | 0      | 0      | 0      | 0      |
| 0      | 0      | 0      | 0      | 0      |
| 0      | 0      | 0      | 0      | 0      |
| 0      | 0      | 0      | 0      | 0      |
| 0      | 0      | 0      | 0      | 0      |
| 0      | 0      | 0      | 0      | 0      |
| 0      | 0      | 0      | 0      | 0      |
| 0      | 0      | 0      | 0      | 0      |
| 0.0689 | 0.0851 | 0.0601 | 0.0425 | 0.079  |
| 0.2112 | 0.2556 | 0.2173 | 0.1343 | 0.2181 |
| 0.1303 | 0.1435 | 0.1295 | 0.1001 | 0.1356 |
| 0.0236 | 0.0317 | 0.0263 | 0.0198 | 0.0224 |
| 0.0695 | 0.0747 | 0.0687 | 0.0514 | 0.0693 |
| 0.0159 | 0.0171 | 0.0171 | 0.0139 | 0.0117 |
| 0.1365 | 0.1531 | 0.156  | 0.1336 | 0.1478 |
| 0.1307 | 0.1609 | 0.1478 | 0.115  | 0.162  |
| 0.1044 | 0.1156 | 0.1129 | 0.0971 | 0.1103 |
| 0.1824 | 0.2074 | 0.1879 | 0.1216 | 0.1637 |
| 0.3644 | 0.4012 | 0.2938 | 0.1767 | 0.2972 |
| 0.2288 | 0.2953 | 0.3099 | 0.2406 | 0.3304 |
| 0.0253 | 0.0305 | 0.0289 | 0.0248 | 0.025  |
| 0.1449 | 0.1794 | 0.1365 | 0.1075 | 0.1495 |
| 0.26   | 0.3294 | 0.2652 | 0.1352 | 0.2155 |
| 0.1371 | 0.1635 | 0.14   | 0.1044 | 0.1353 |
| 0.0063 | 0.0085 | 0.008  | 0.0075 | 0.0081 |
| 0.002  | 0.0026 | 0.0027 | 0.0028 | 0.0026 |

|        |        |        |        |        |
|--------|--------|--------|--------|--------|
| 0.0015 | 0.0018 | 0.0019 | 0.0017 | 0.0016 |
| 0.001  | 0.0012 | 0.0011 | 0.0011 | 0.0011 |
| 0      | 0      | 0      | 0      | 0      |
| 0      | 0      | 0      | 0      | 0      |
| 0.0017 | 0.002  | 0.0019 | 0.002  | 0.0019 |
| 0.001  | 0.0012 | 0.0013 | 0.0012 | 0.0011 |
| 0      | 0      | 0      | 0      | 0      |
| 0      | 0      | 0      | 0      | 0      |
| 0      | 0      | 0      | 0      | 0      |
| 0      | 0      | 0      | 0      | 0      |
| 0      | 0      | 0      | 0      | 0      |
| 0      | 0      | 0      | 0      | 0      |
| 0      | 0      | 0      | 0      | 0      |
| 0      | 0      | 0      | 0      | 0      |
| 0      | 0      | 0      | 0      | 0      |
| 0      | 0      | 0      | 0      | 0      |
| 0      | 0      | 0      | 0      | 0      |
| 0      | 0      | 0      | 0      | 0      |
| 0      | 0      | 0      | 0      | 0      |
| 0      | 0      | 0      | 0      | 0      |
| 0      | 0      | 0      | 0      | 0      |
| 0      | 0      | 0      | 0      | 0      |
| 0      | 0      | 0      | 0      | 0      |
| 0      | 0      | 0      | 0      | 0      |
| 0      | 0      | 0      | 0      | 0      |
| 0      | 0      | 0      | 0      | 0      |
| 0      | 0      | 0      | 0      | 0      |
| 0      | 0      | 0      | 0      | 0      |
| 0      | 0      | 0      | 0      | 0      |
| 0      | 0      | 0      | 0      | 0      |
| 0.0291 | 0.0324 | 0.0262 | 0.0178 | 0.0247 |
| 0.0235 | 0.0255 | 0.0209 | 0.011  | 0.0193 |
| 0.0233 | 0.0276 | 0.0244 | 0.0198 | 0.0263 |
| 0.0128 | 0.0157 | 0.0146 | 0.0067 | 0.0126 |
| 0.0267 | 0.0313 | 0.0284 | 0.0227 | 0.0272 |
| 0.0236 | 0.0314 | 0.0277 | 0.0223 | 0.0305 |
| 0.0275 | 0.0327 | 0.0273 | 0.0196 | 0.0286 |
| 0.0364 | 0.0414 | 0.0371 | 0.0314 | 0.038  |
| 0.0398 | 0.0447 | 0.0382 | 0.0279 | 0.0424 |
| 0.0328 | 0.0401 | 0.0357 | 0.0244 | 0.0448 |
| 0.0302 | 0.0323 | 0.0288 | 0.0158 | 0.0261 |
| 0.0317 | 0.0365 | 0.0291 | 0.0211 | 0.0366 |

|        |        |        |        |        |
|--------|--------|--------|--------|--------|
| 0.032  | 0.0401 | 0.0287 | 0.0184 | 0.0275 |
| 0.041  | 0.0454 | 0.0444 | 0.0333 | 0.0461 |
| 0.0425 | 0.0521 | 0.0436 | 0.0316 | 0.0502 |
| 0.0273 | 0.0353 | 0.0316 | 0.0177 | 0.037  |
| 0      | 0      | 0      | 0      | 0      |
| 0      | 0      | 0      | 0      | 0      |
| 0      | 0      | 0      | 0      | 0      |
| 0      | 0      | 0      | 0      | 0      |
| 0      | 0      | 0      | 0      | 0      |
| 0      | 0      | 0      | 0      | 0      |
| 0      | 0      | 0      | 0      | 0      |
| 0      | 0      | 0      | 0      | 0      |
| 0      | 0      | 0      | 0      | 0      |
| 0      | 0      | 0      | 0      | 0      |
| 0      | 0      | 0      | 0      | 0      |
| 0      | 0      | 0      | 0      | 0      |
| 0      | 0      | 0      | 0      | 0      |
| 0      | 0      | 0      | 0      | 0      |
| 0      | 0      | 0      | 0      | 0      |
| 0      | 0      | 0      | 0      | 0      |
| 0      | 0      | 0      | 0      | 0      |
| 0      | 0      | 0      | 0      | 0      |
| 0      | 0      | 0      | 0      | 0      |
| 0      | 0      | 0      | 0      | 0      |
| 0      | 0      | 0      | 0      | 0      |
| 0      | 0      | 0      | 0      | 0      |
| 0      | 0      | 0      | 0      | 0      |
| 0      | 0      | 0      | 0      | 0      |
| 0      | 0      | 0      | 0      | 0      |
| 0      | 0      | 0      | 0      | 0      |
| 0      | 0      | 0      | 0      | 0      |
| 0      | 0      | 0      | 0      | 0      |
| 0      | 0      | 0      | 0      | 0      |
| 0      | 0      | 0      | 0      | 0      |
| 0      | 0      | 0      | 0      | 0      |
| 0      | 0      | 0      | 0      | 0      |
| 0      | 0      | 0      | 0      | 0      |
| 0      | 0      | 0      | 0      | 0      |
| 0.0158 | 0.0186 | 0.0159 | 0.0128 | 0.0141 |
| 0.01   | 0.0129 | 0.0098 | 0.0051 | 0.0102 |
| 0.0098 | 0.011  | 0.0087 | 0.0059 | 0.0107 |
| 0.0079 | 0.0107 | 0.0099 | 0.0057 | 0.0117 |
| 0.01   | 0.012  | 0.0094 | 0.008  | 0.0094 |
| 0.0095 | 0.0119 | 0.0098 | 0.0061 | 0.0093 |















|        |        |        |        |        |
|--------|--------|--------|--------|--------|
| 0      | 0      | 0      | 0      | 0      |
| 0      | 0      | 0      | 0      | 0      |
| 0      | 0      | 0      | 0      | 0      |
| 0      | 0      | 0      | 0      | 0      |
| 0      | 0      | 0      | 0      | 0      |
| 0      | 0      | 0      | 0      | 0      |
| 0      | 0      | 0      | 0      | 0      |
| 0      | 0      | 0      | 0      | 0      |
| 0      | 0      | 0      | 0      | 0      |
| 0      | 0      | 0      | 0      | 0      |
| 0      | 0      | 0      | 0      | 0      |
| 0      | 0      | 0      | 0      | 0      |
| 0      | 0      | 0      | 0      | 0      |
| 0      | 0      | 0      | 0      | 0      |
| 0      | 0      | 0      | 0      | 0      |
| 0      | 0      | 0      | 0      | 0      |
| 0      | 0      | 0      | 0      | 0      |
| 0      | 0      | 0      | 0      | 0      |
| 0      | 0      | 0      | 0      | 0      |
| 0      | 0      | 0      | 0      | 0      |
| 0      | 0      | 0      | 0      | 0      |
| 0      | 0      | 0      | 0      | 0      |
| 0      | 0      | 0      | 0      | 0      |
| 0      | 0      | 0      | 0      | 0      |
| 0      | 0      | 0      | 0      | 0      |
| 0      | 0      | 0      | 0      | 0      |
| 0.0018 | 0.002  | 0.002  | 0.0019 | 0.0017 |
| 0.0015 | 0.0015 | 0.0015 | 0.0015 | 0.0013 |
| 0.0006 | 0.0006 | 0.0007 | 0.0006 | 0.0005 |
| 0      | 0      | 0      | 0      | 0      |
| 0      | 0      | 0      | 0      | 0      |
| 0      | 0      | 0      | 0      | 0      |
| 0.0007 | 0.0007 | 0.0007 | 0.0007 | 0.0006 |
| 0.0006 | 0.0006 | 0.0007 | 0.0006 | 0.0005 |
| 0.0037 | 0.0044 | 0.004  | 0.0022 | 0.0041 |
| 0.0028 | 0.0042 | 0.003  | 0.0017 | 0.0037 |
| 0.0041 | 0.0066 | 0.0056 | 0.0043 | 0.0062 |
| 0.0048 | 0.0065 | 0.0054 | 0.0048 | 0.0067 |
| 0.0051 | 0.0068 | 0.0064 | 0.0052 | 0.0065 |
| 0.0042 | 0.005  | 0.0039 | 0.0016 | 0.0033 |
